# Supplementary material for: Metatranscriptome Analysis of Nasopharyngeal Swabs across the Varying Severity of COVID-19 Disease Demonstrated Unprecedented Species Diversity
Source: MDPI journal article supplement (doi:10.3390/microorganisms11071804), 2023-07-14

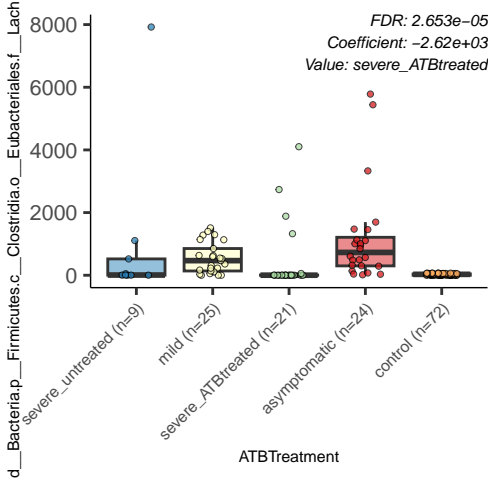

FDR:  $2.653e-05$   
Coefficient:  $-2.62e+03$   
Value: severe\_ATBtreated

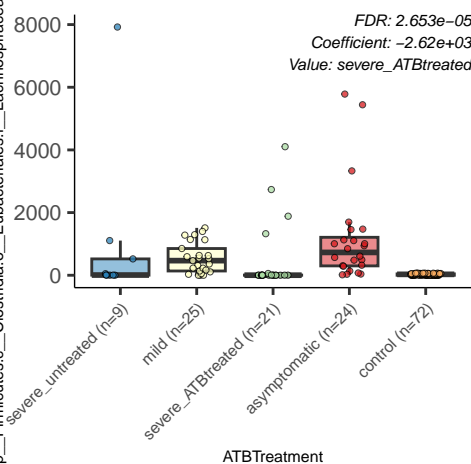

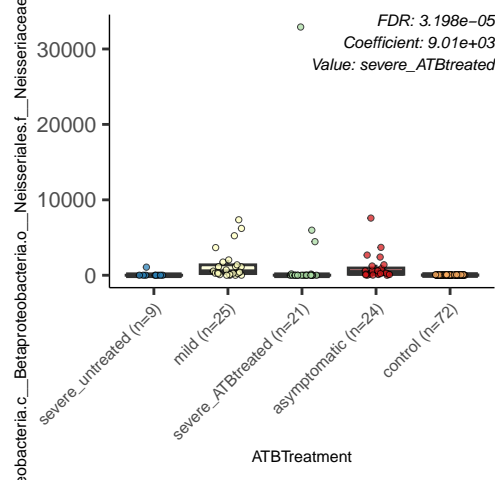

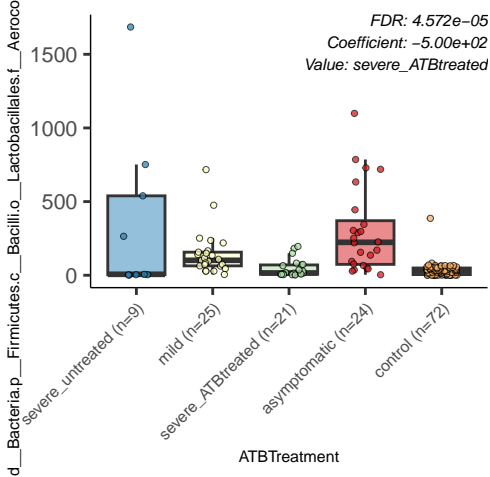

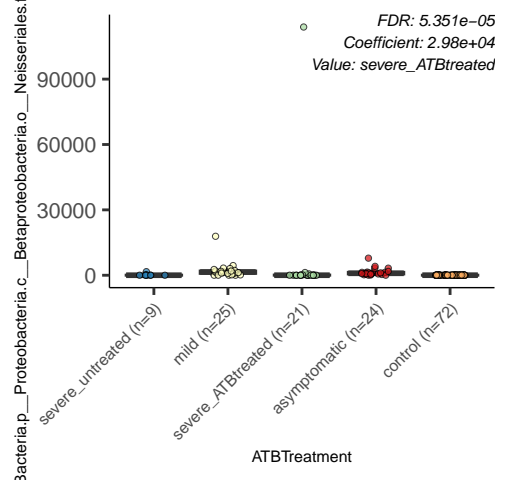

eria.p\_Actinobacteria.c\_Actinomycetia.o\_Actinomycetales.f\_Ac

$FDR: 5.414e-05$   
 $Coefficient: -3.20e+03$   
 $Value: severe\_ATBtreated$

10000

5000

0

severe\_untreated (n=9)

mild (n=25)

severe\_ATBtreated (n=21)

asymptomatic (n=24)

control (n=72)

ATBTreatment

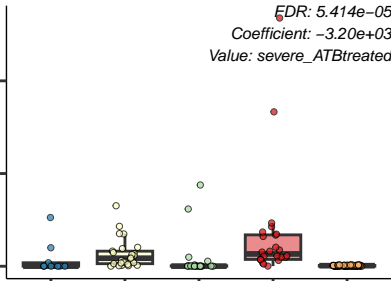

bacteria.c\_Actinomycetia.o\_Actinomycetales.f\_Actinomycetaceae

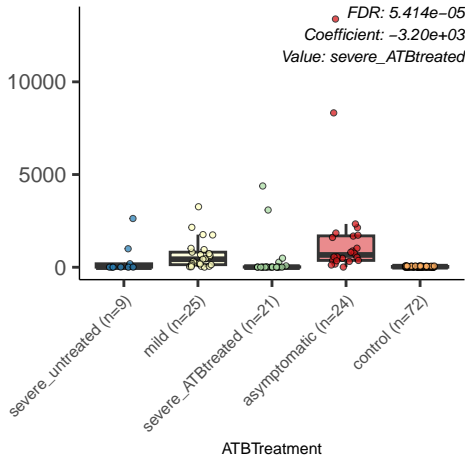

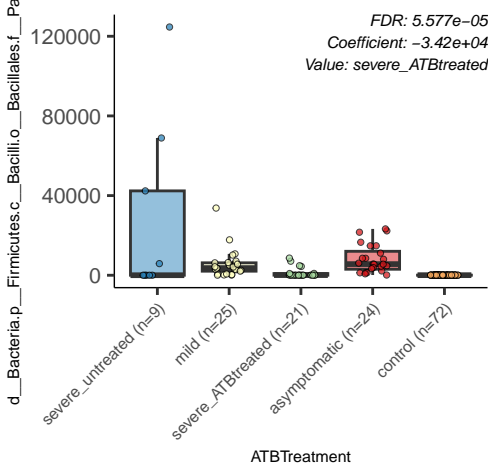



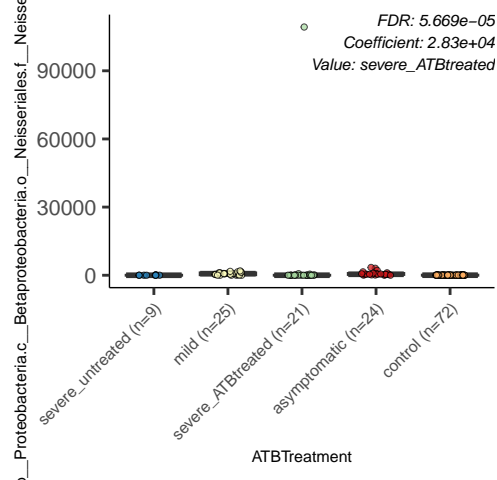

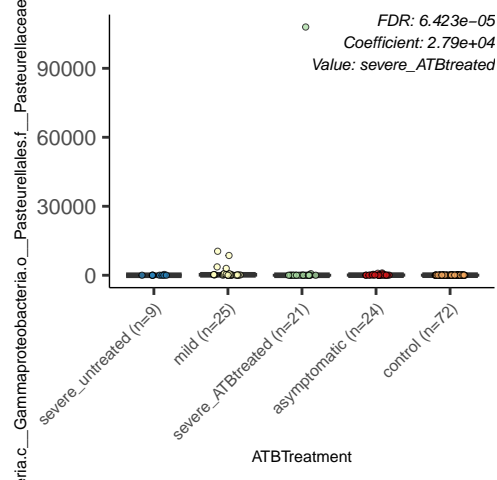

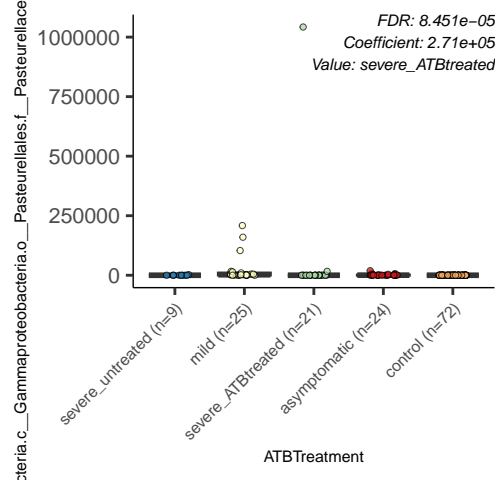

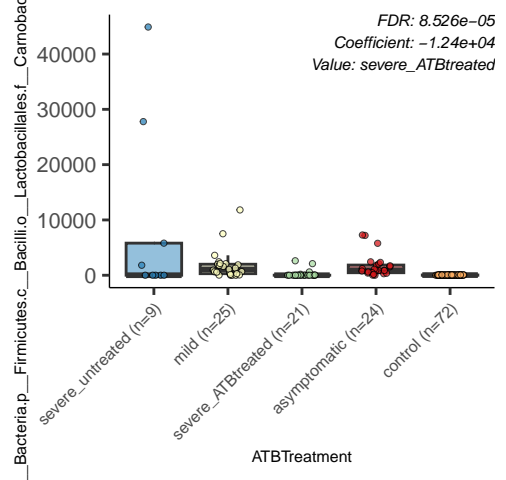

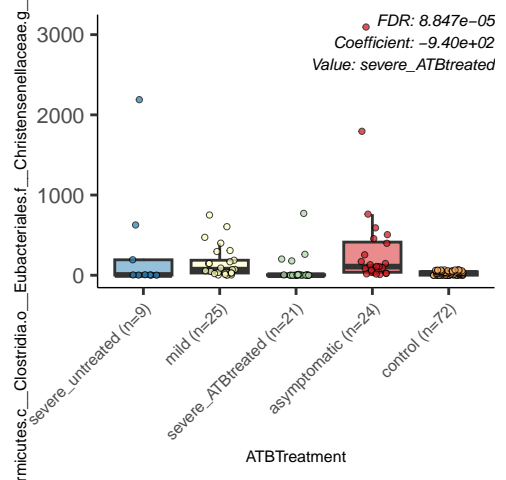

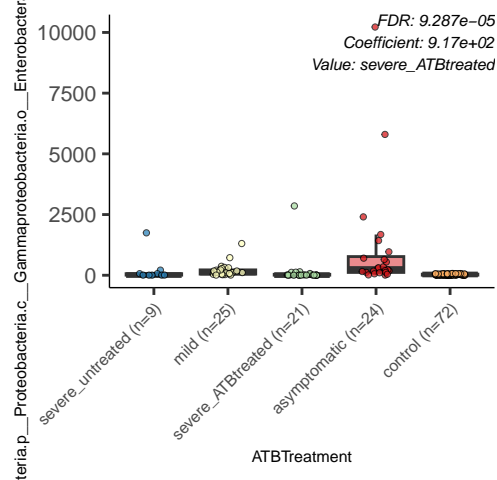

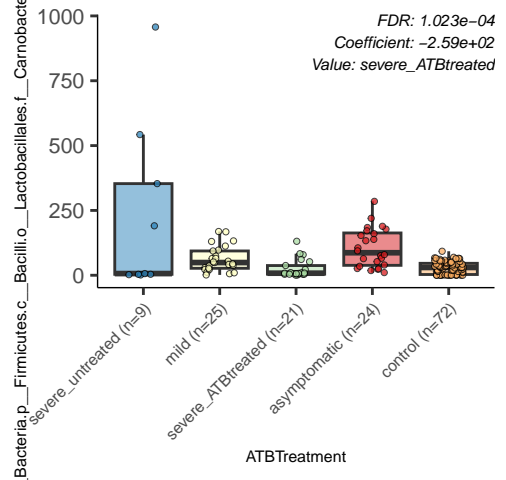

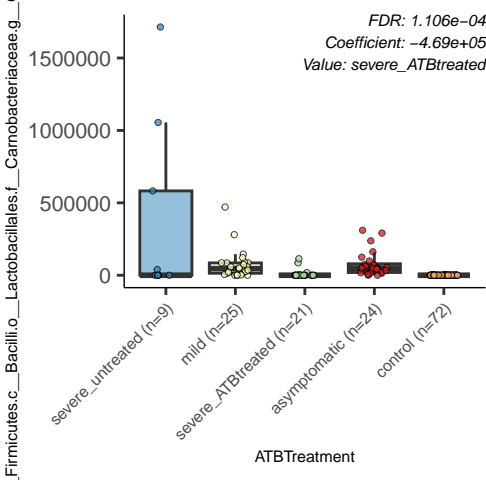



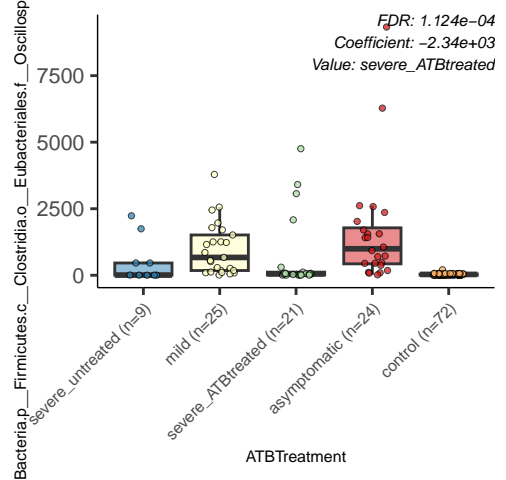

a.c\_\_Gammaproteobacteria.o\_\_Pasteurellales.f\_\_Pasteurellaceae.g

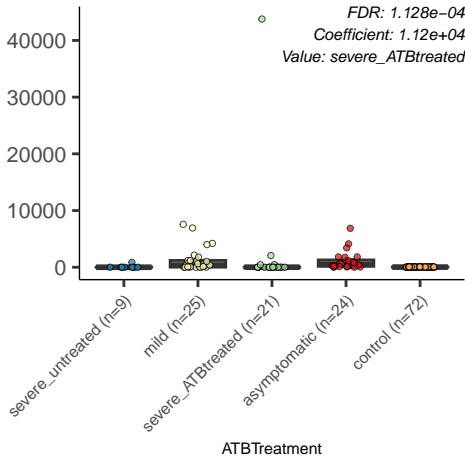

d\_Bacteria.p\_Firmicutes.c\_Bacilli.o\_Bacillales.f\_Paenibacillales

FDR: 1.206e-04  
Coefficient: -2.82e+04  
Value: severe\_ATBtreated

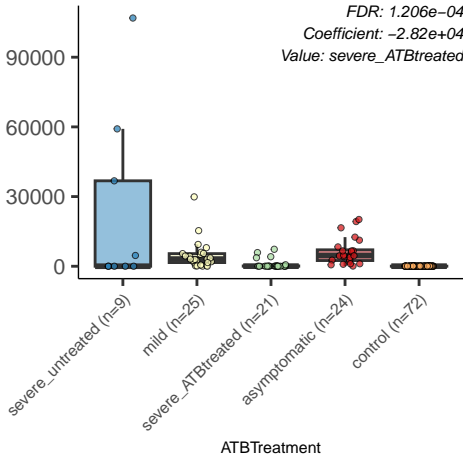

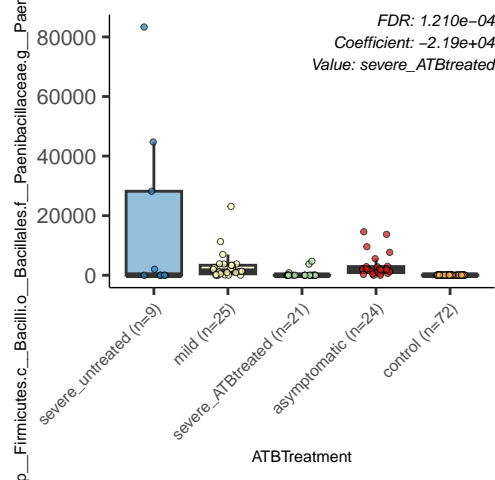

d\_Bacteria.p\_Firmicutes.c\_Bacilli.o\_Lactobacillales.f

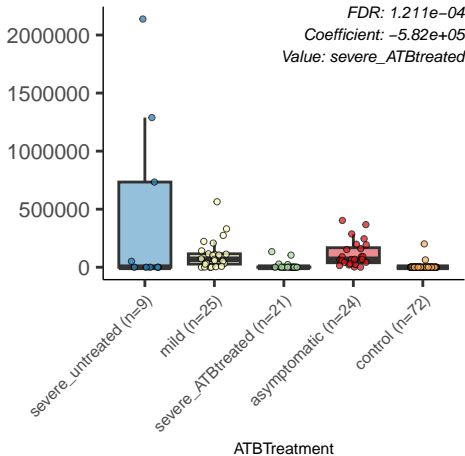

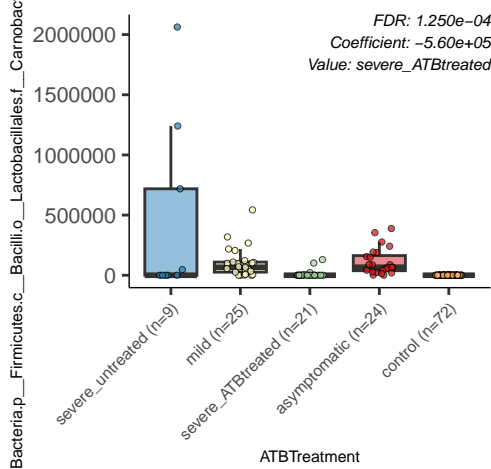

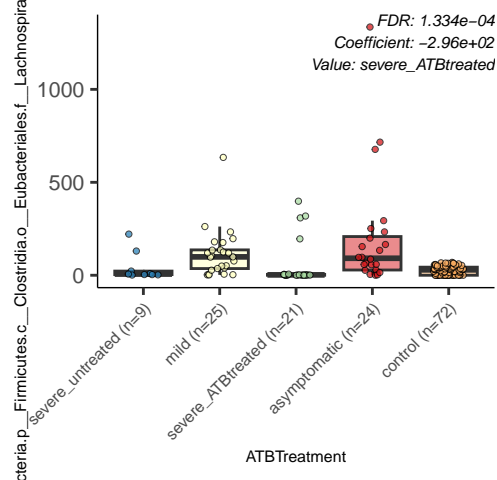

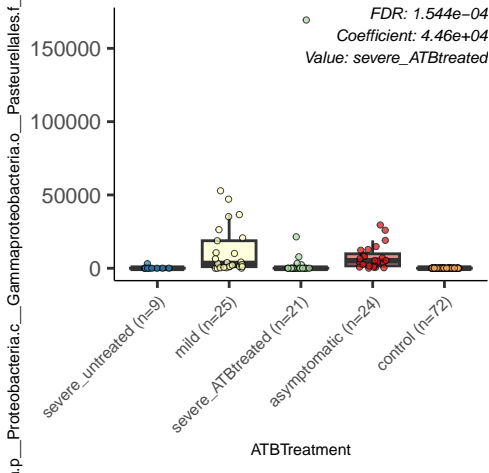



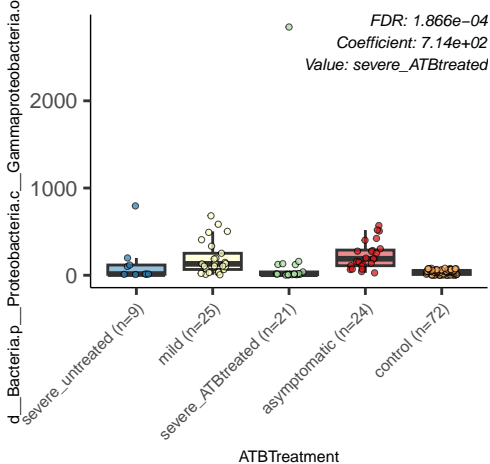

ria.p\_\_Proteobacteria.c\_\_Gammaproteobacteria.o\_\_Pasteurellales.

FDR: 2.012e-04  
Coefficient: 8.03e+02  
Value: severe\_ATBtreated

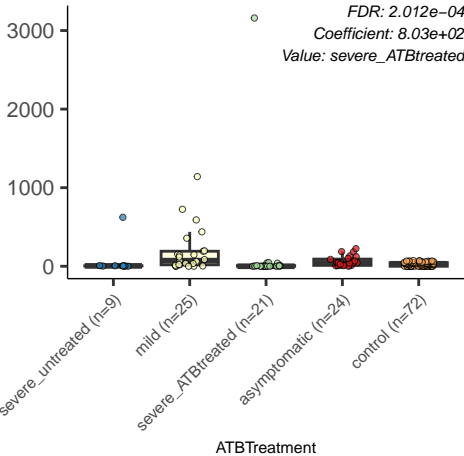

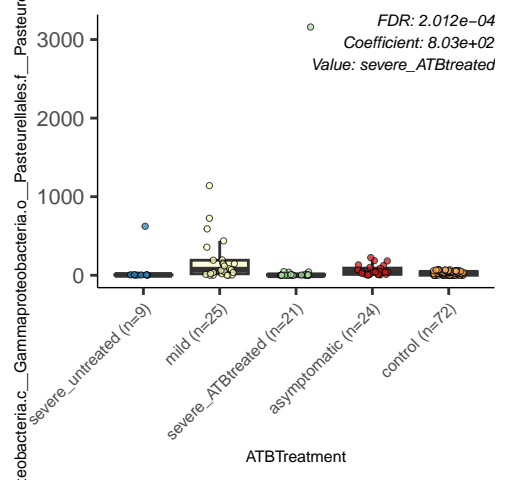

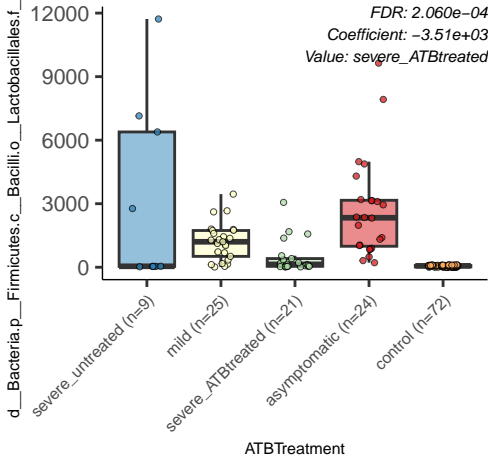

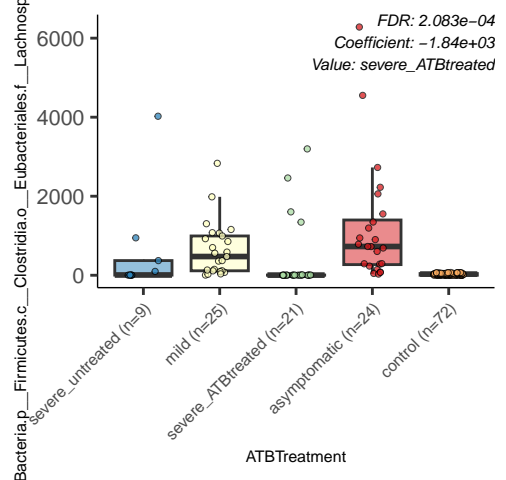

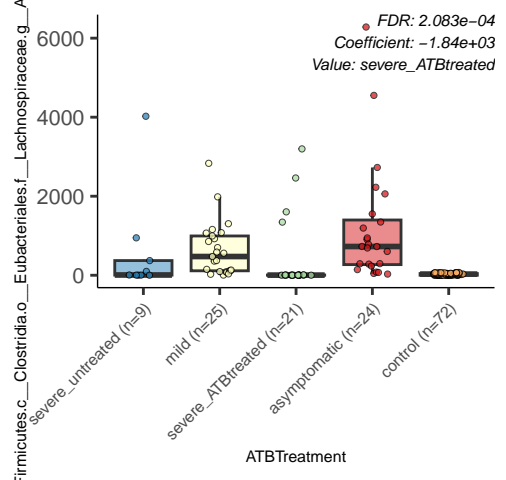

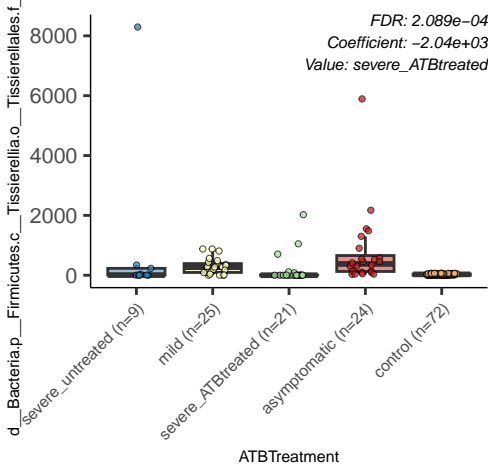

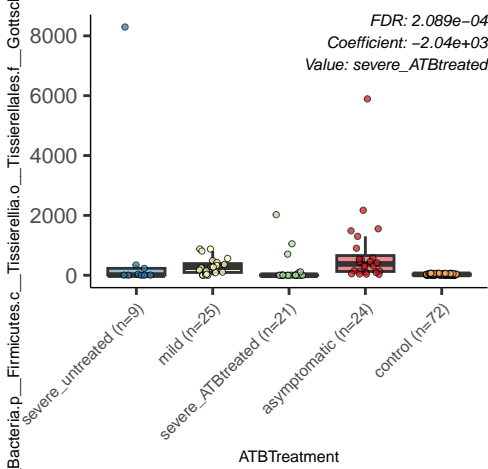



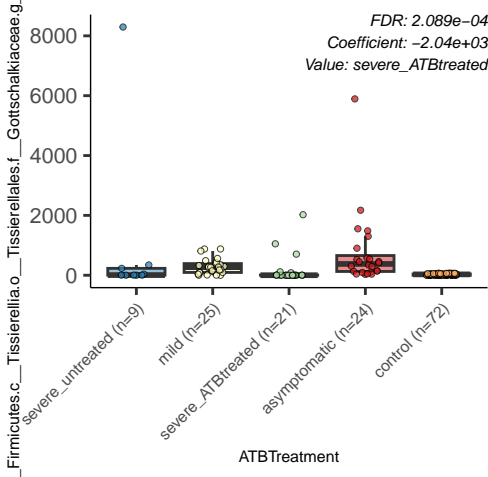

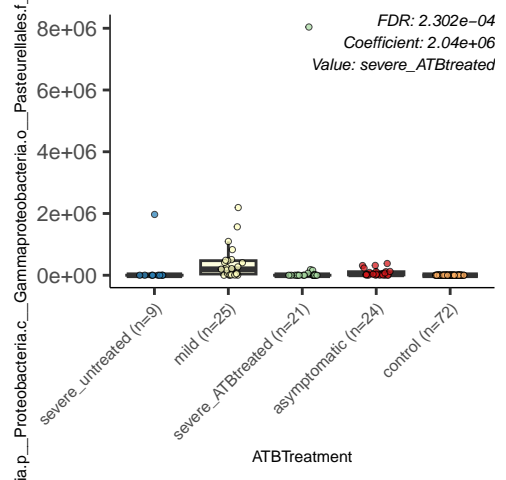

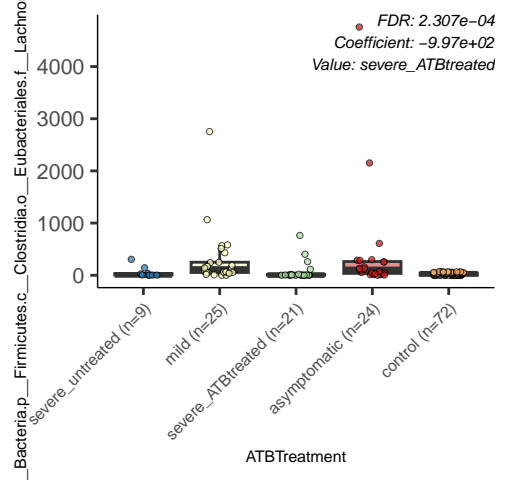

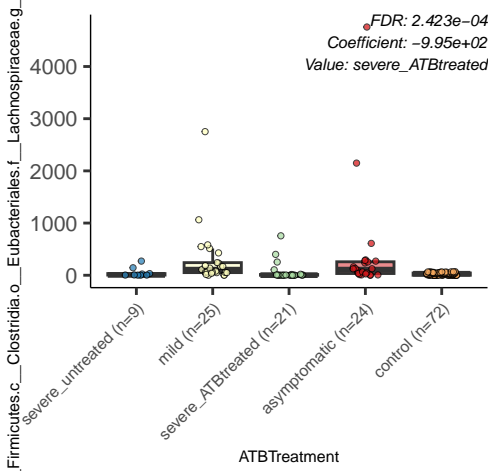

bacteria.p\_\_Proteobacteria.c\_\_Gammaproteobacteria.o\_\_Enterobact

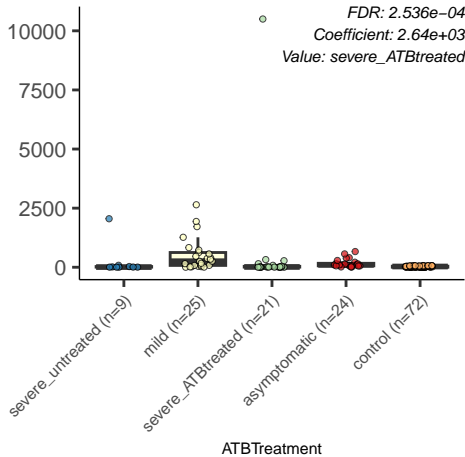

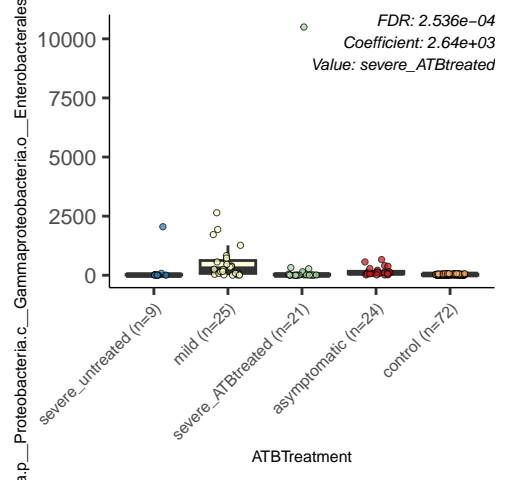

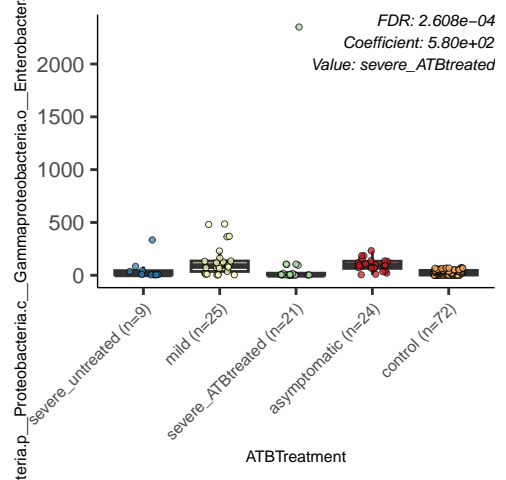

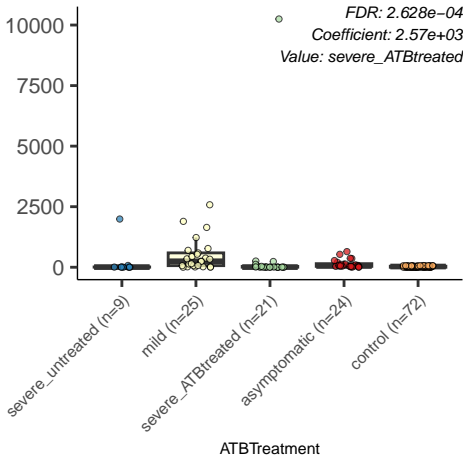



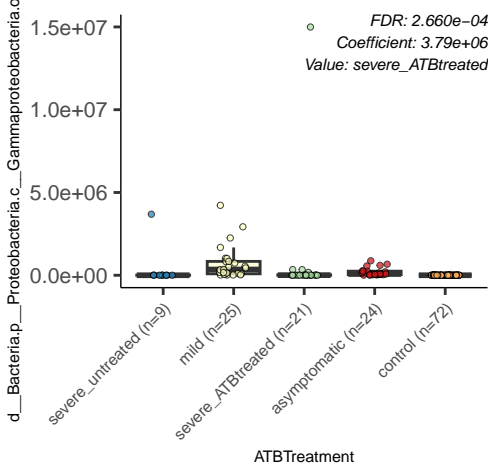

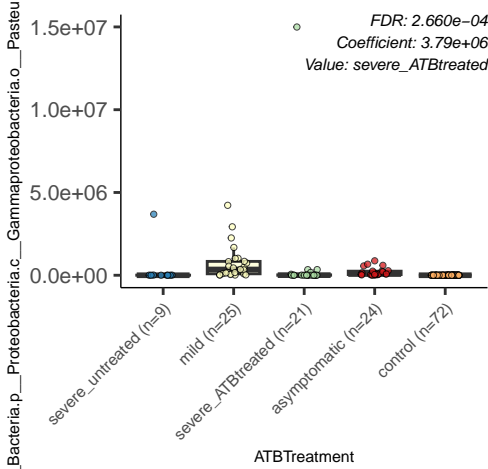

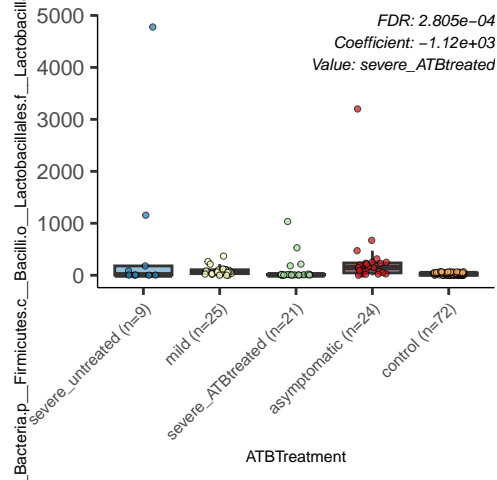

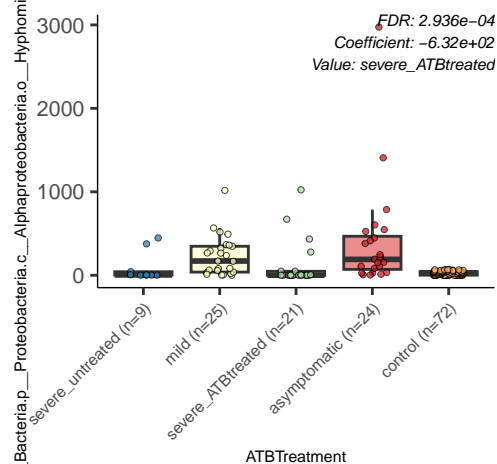

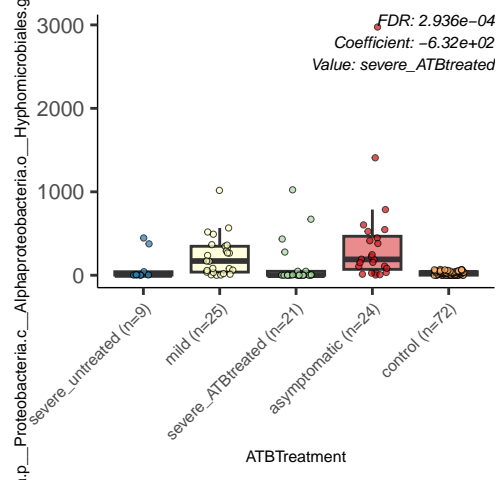

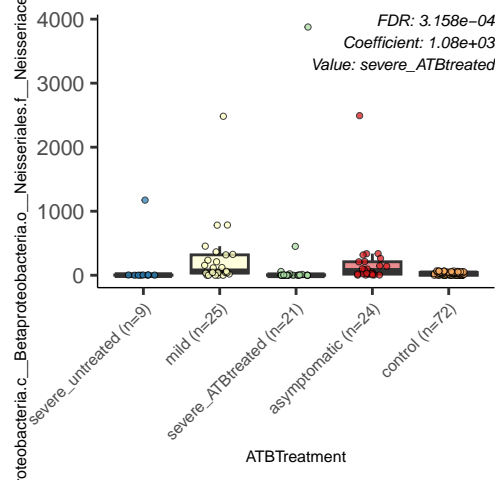

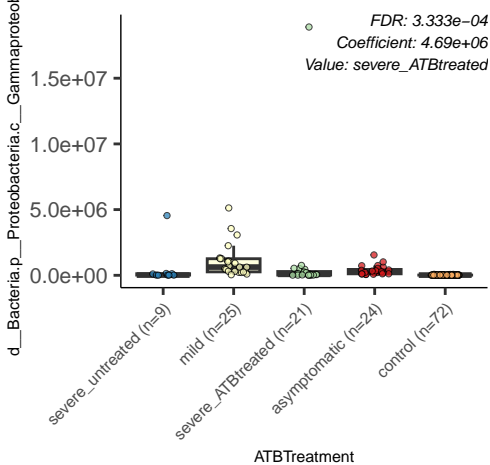

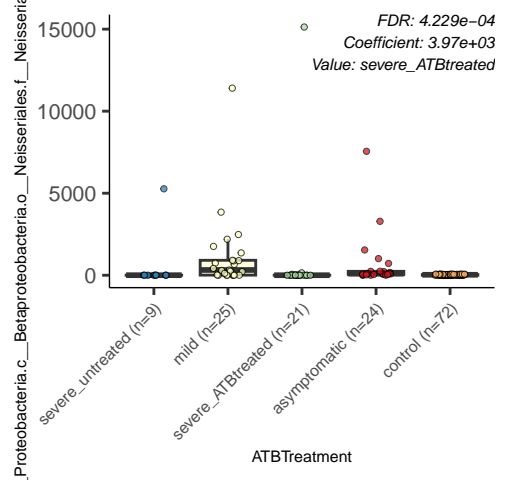



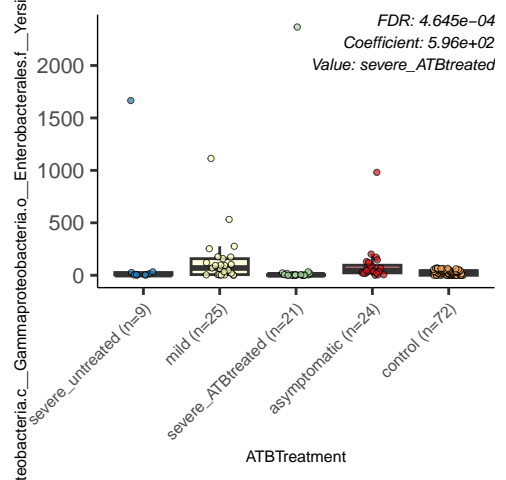

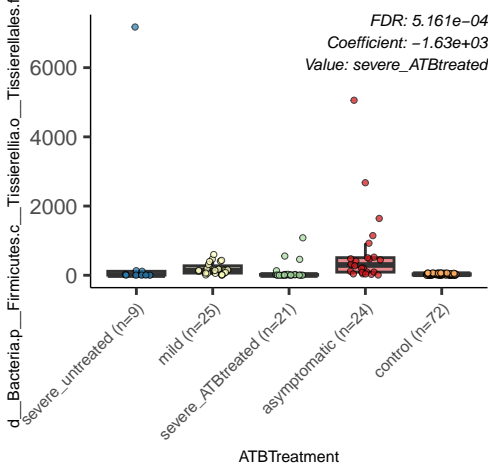

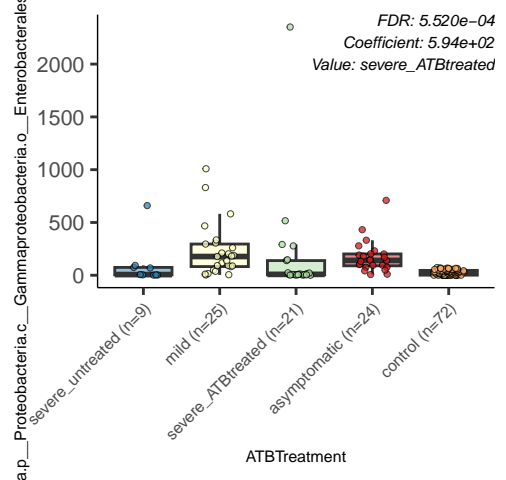

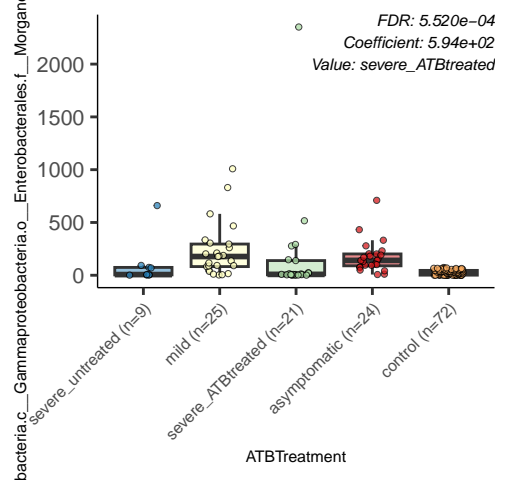

d\_Bacteria.p\_Firmicutes.c\_Clostridia.o\_Halanaerobiales.f

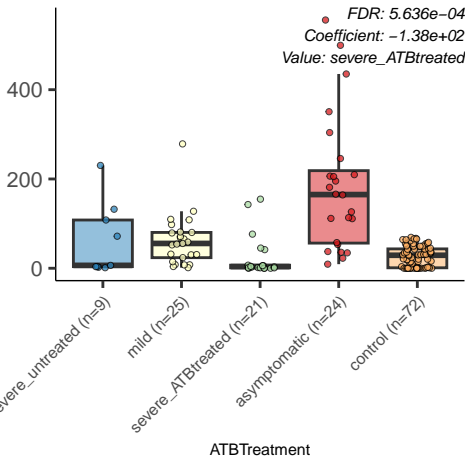

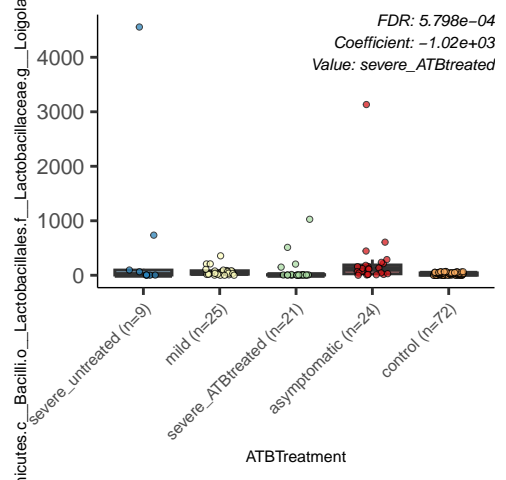

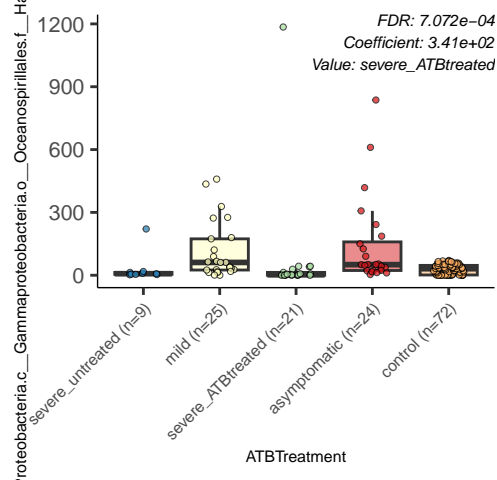

terial.c\_\_Gammaproteobacteria.o\_\_Pasteurellales.f\_\_Pasteurellaceae

*FDR: 8.018e-04*  
*Coefficient: 4.35e+05*  
*Value: severe\_ATBtreated*

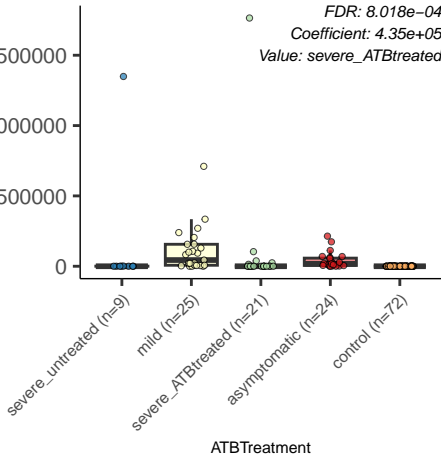



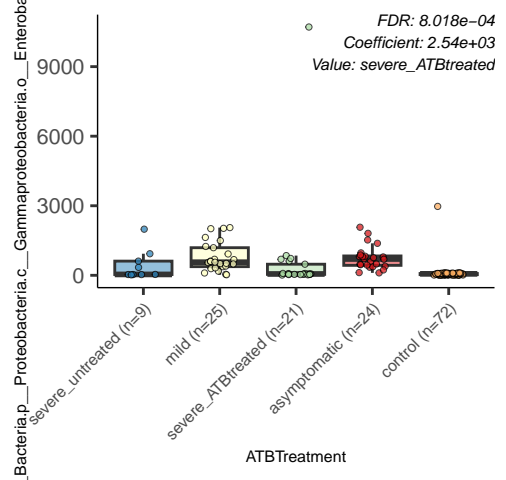

bacteria.p\_Firmicutes.c\_Clostridia.o\_Eubacteriales.f\_Lachnosp

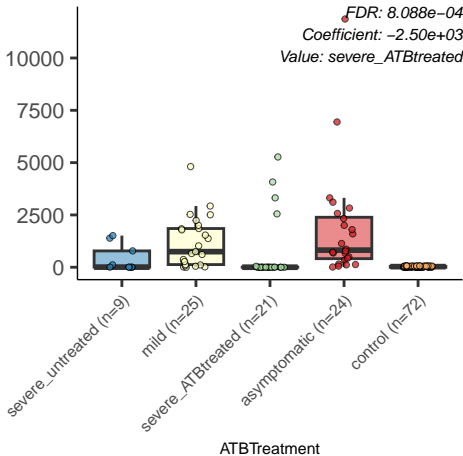

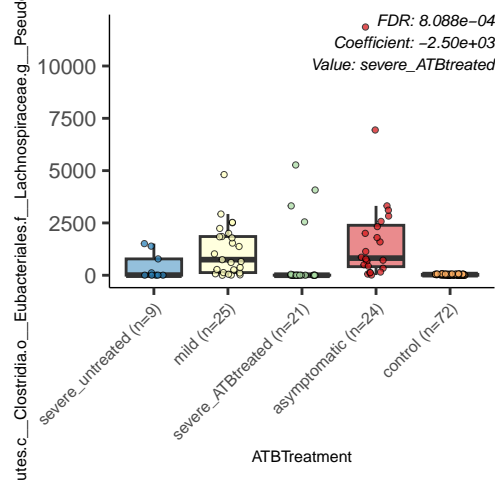

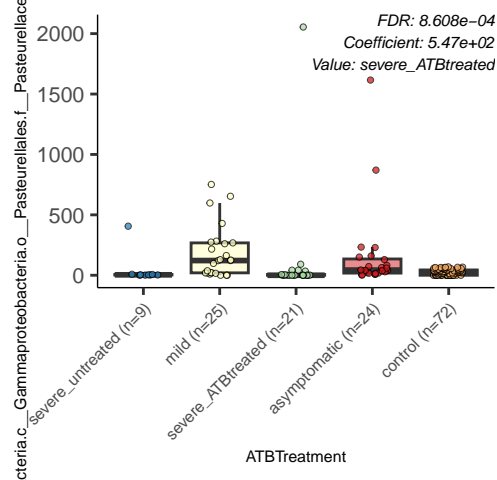

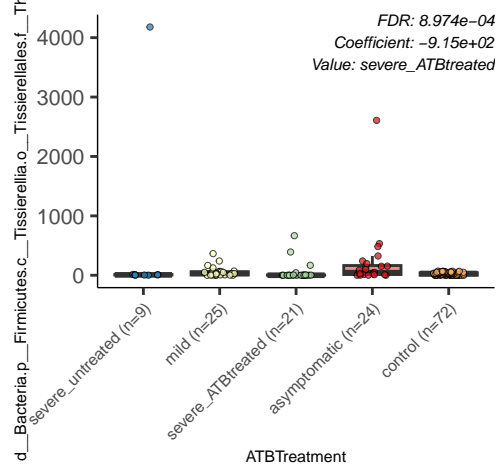

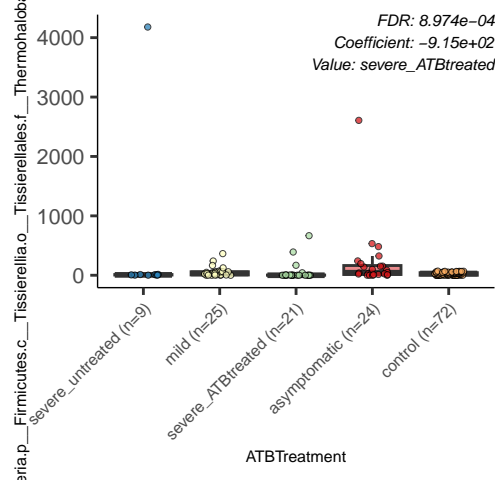

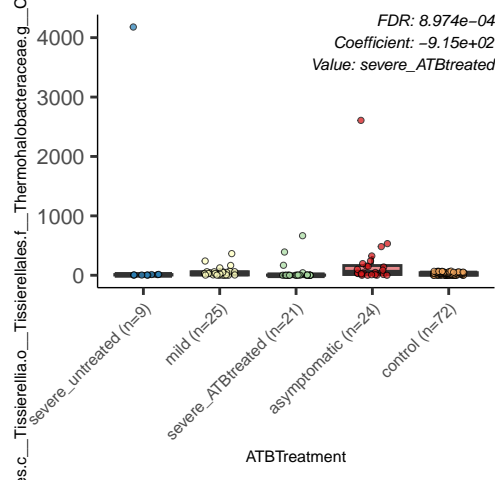

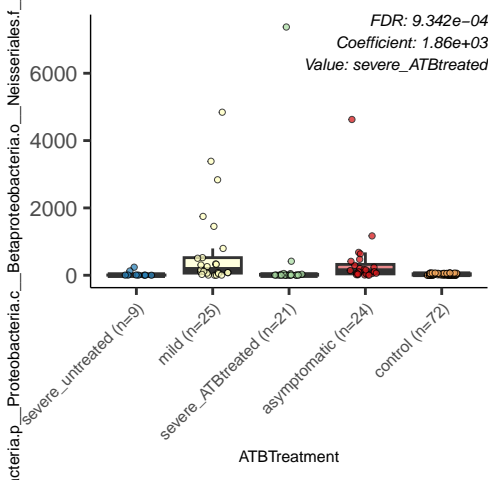



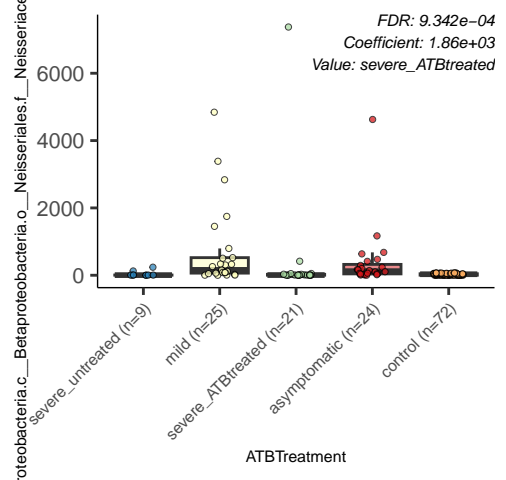

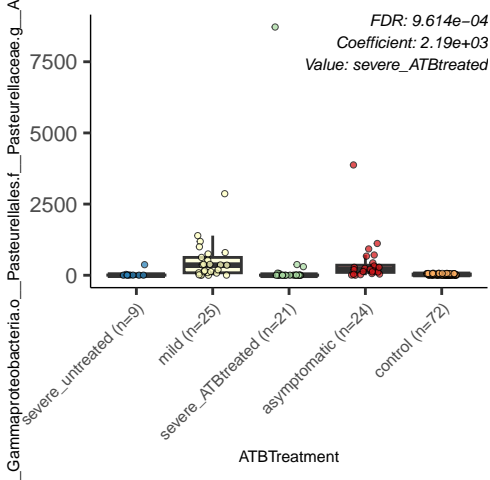

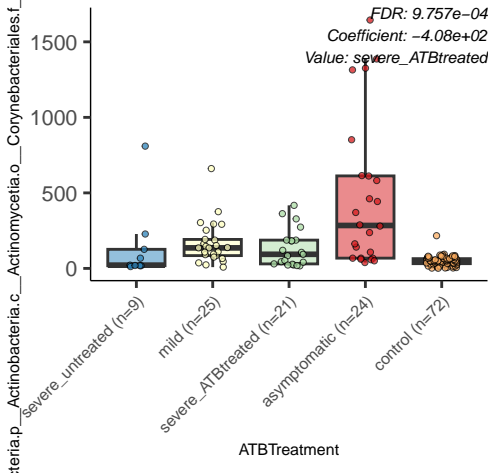

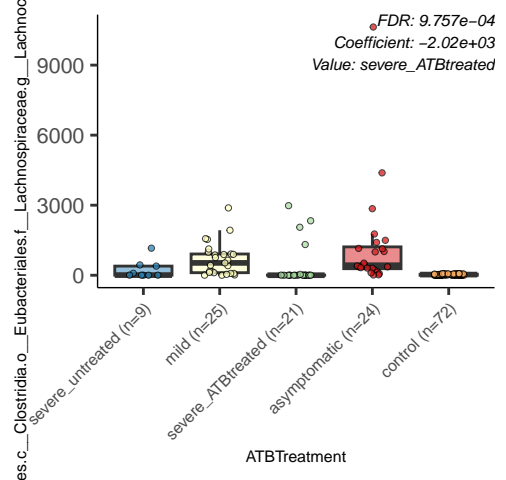

ia.c\_\_Gammaproteobacteria.o\_\_Pasteurellales.f\_\_Pasteurellaceae.

FDR:  $9.781e-04$   
Coefficient:  $4.88e+02$   
Value: severe\_ATBtreated

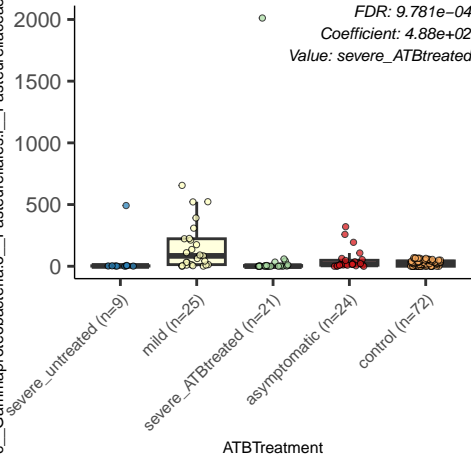

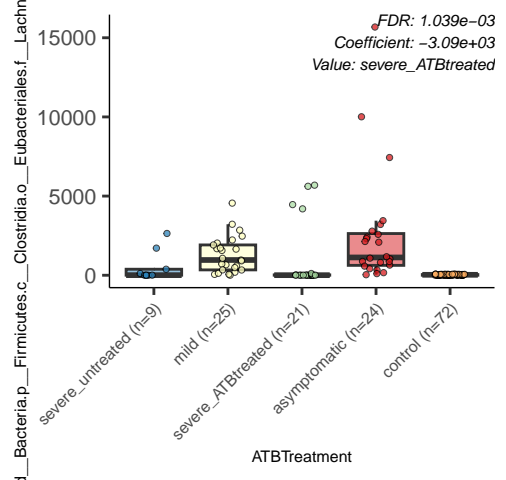

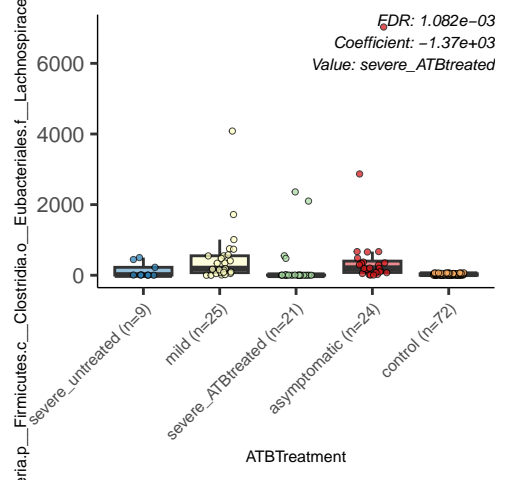

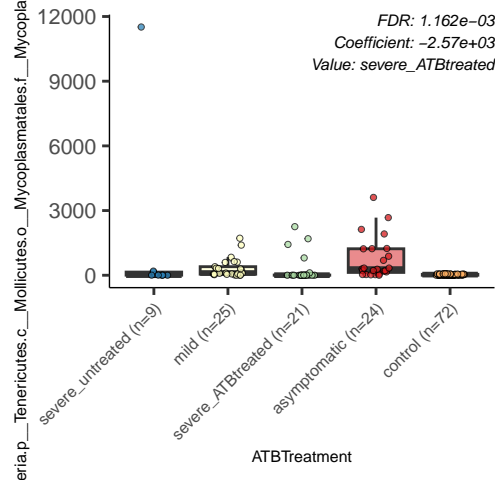



p\_Firmicutes.c\_Clostridia.o\_Eubacteriales.f\_Lachnospiraceae

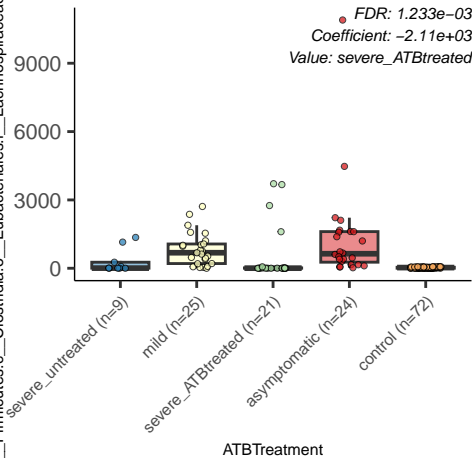

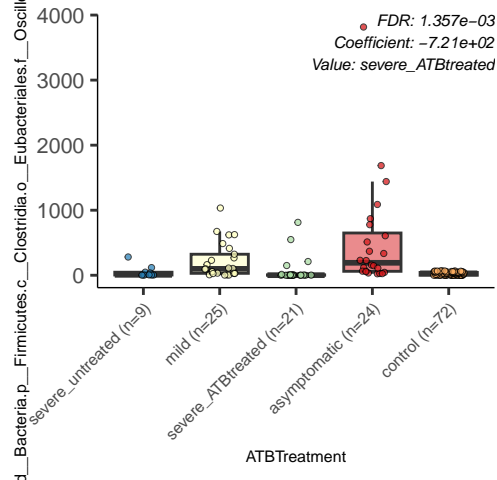

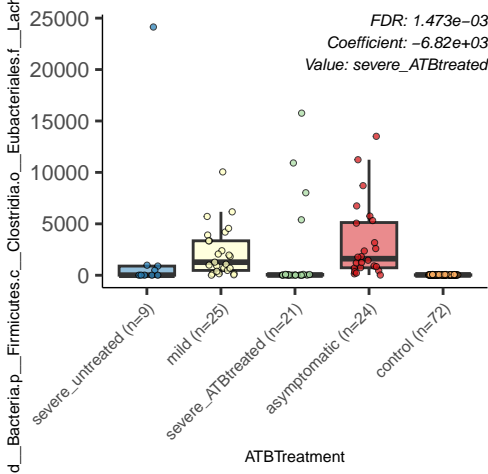

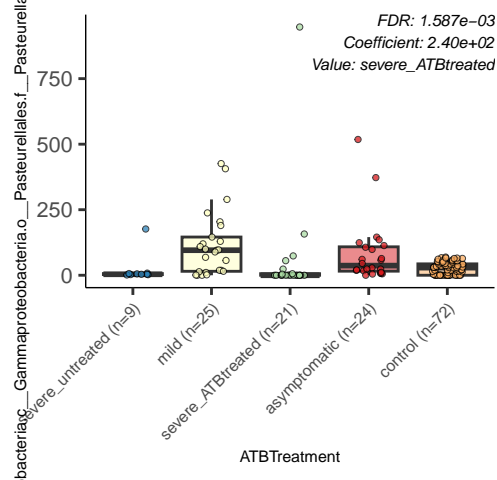

a.p\_\_Proteobacteria.c\_\_Gammaproteobacteria.o\_\_Aeromonadales.

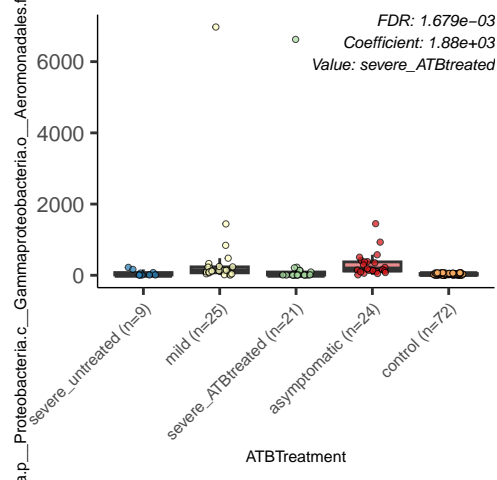

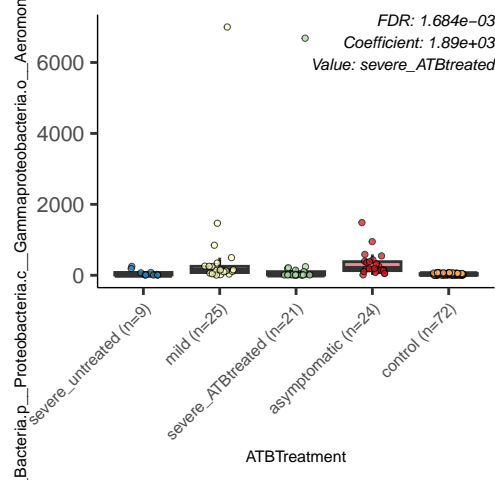

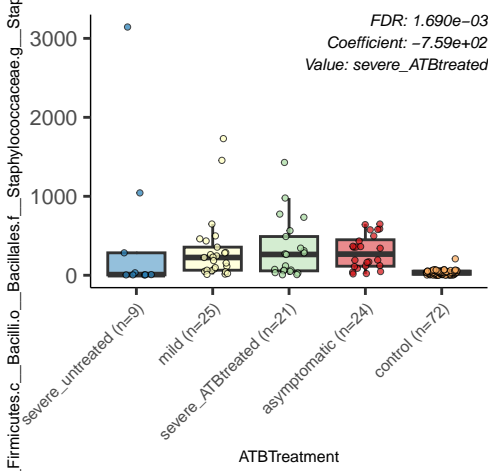

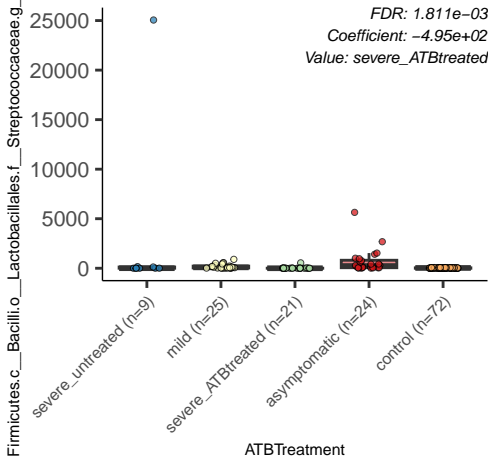



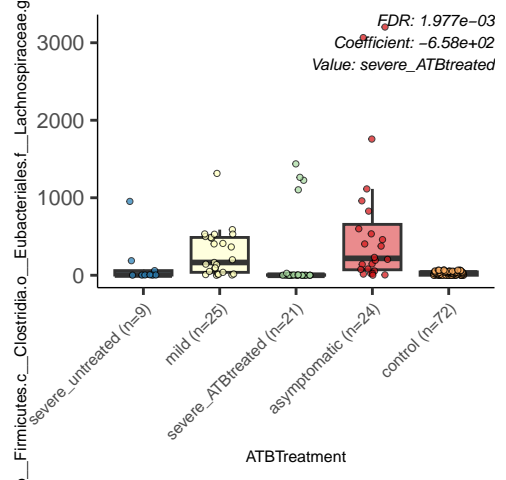

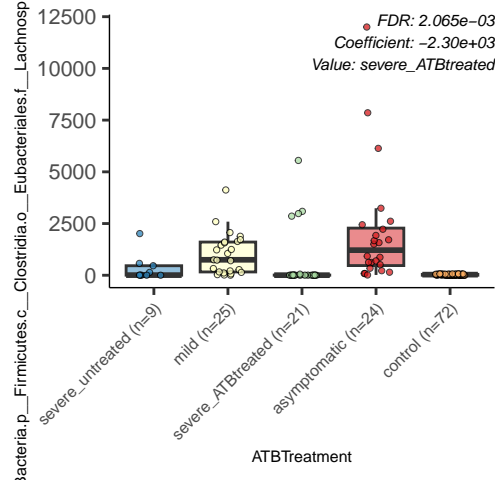

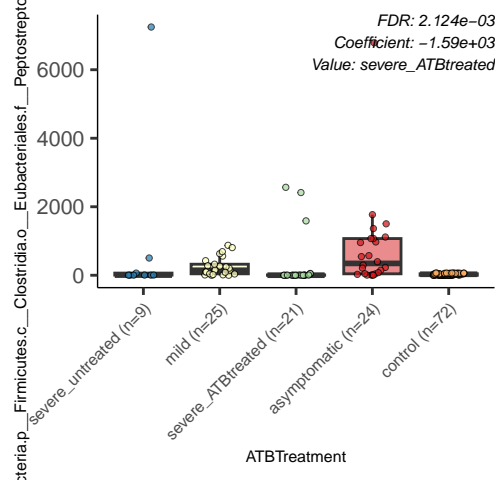

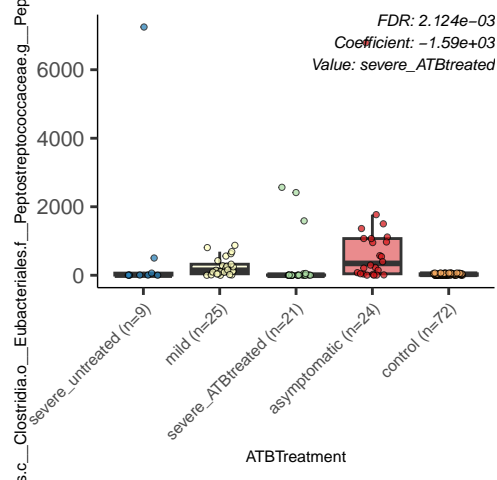

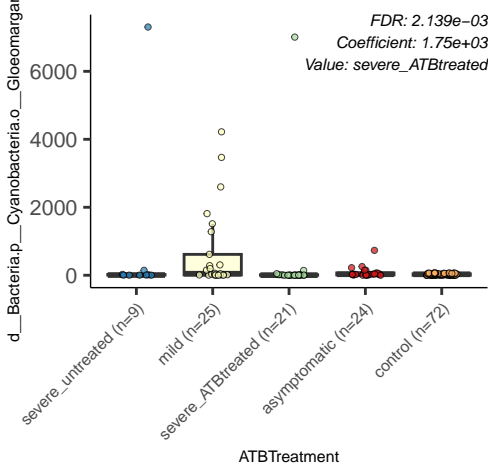

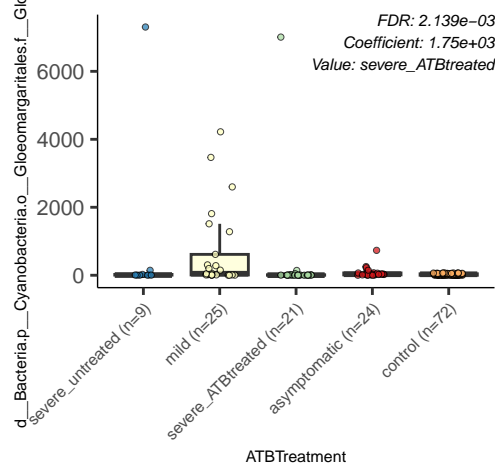

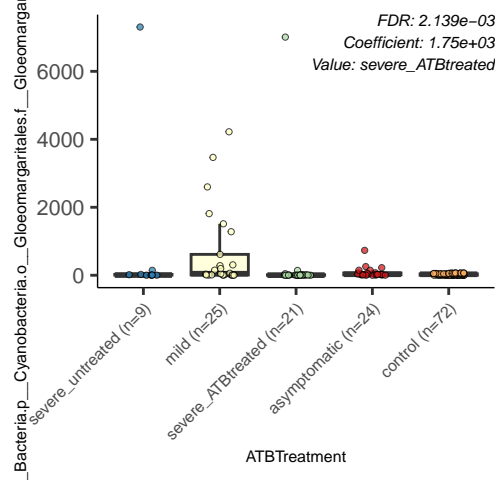

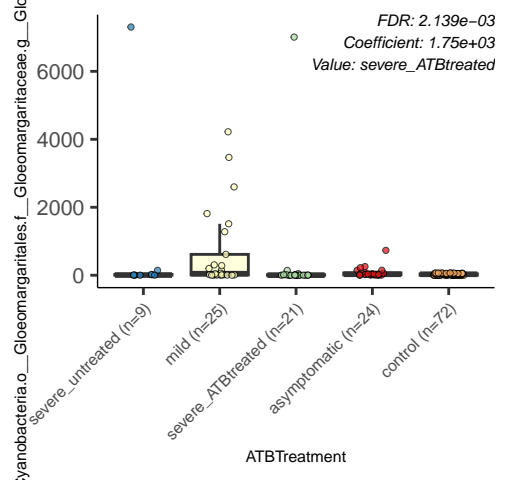



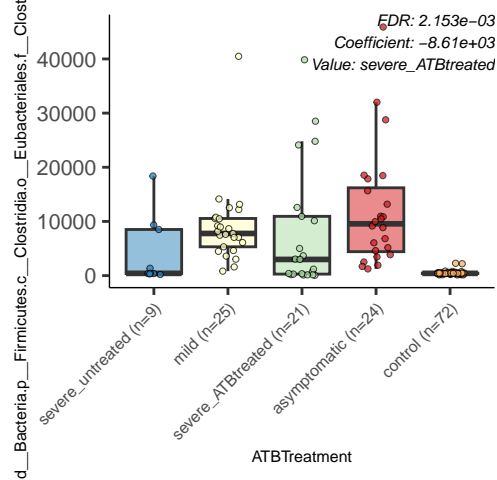

Bacteria.p\_Firmicutes.c\_Clostridia.o\_Eubacteriales.f\_Peptostreptococcaceae

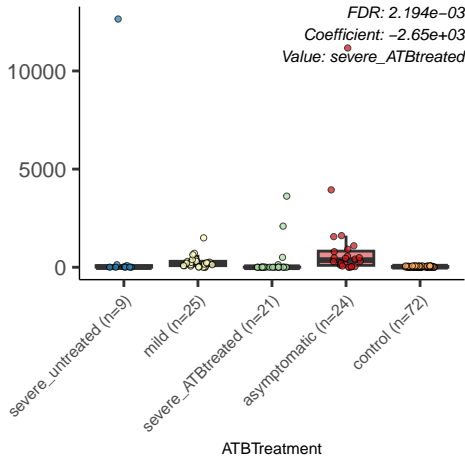

rmicutes.c\_\_Clostridia.o\_\_Eubacteriales.f\_\_Peptostreptococcaceae

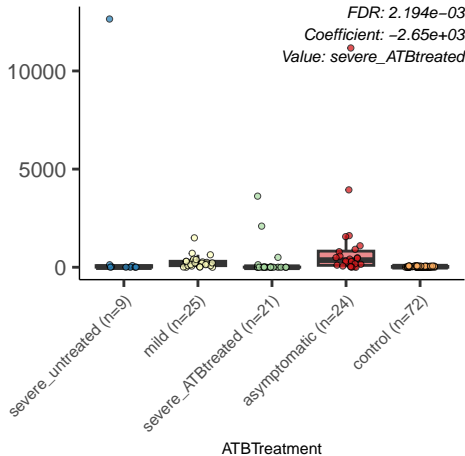

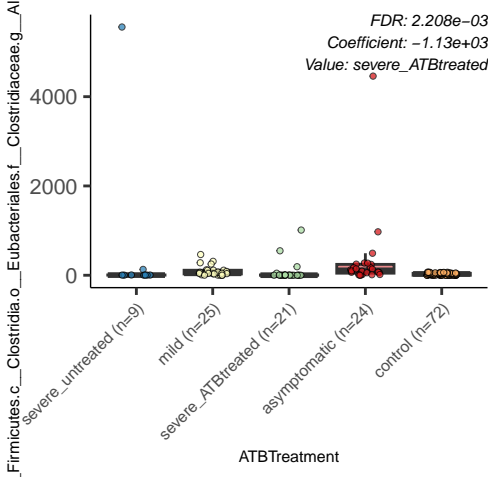

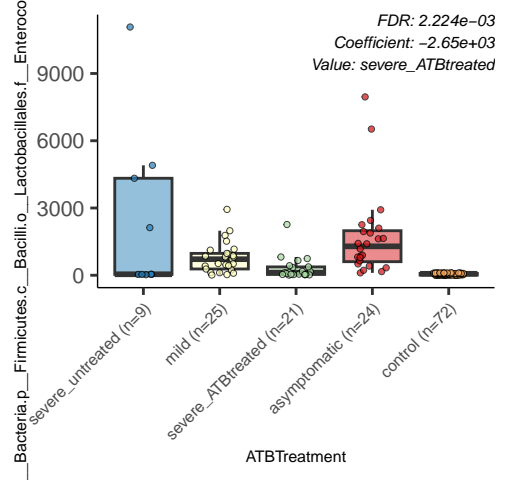

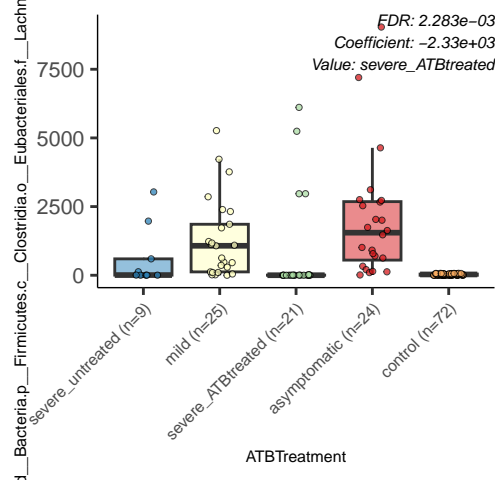

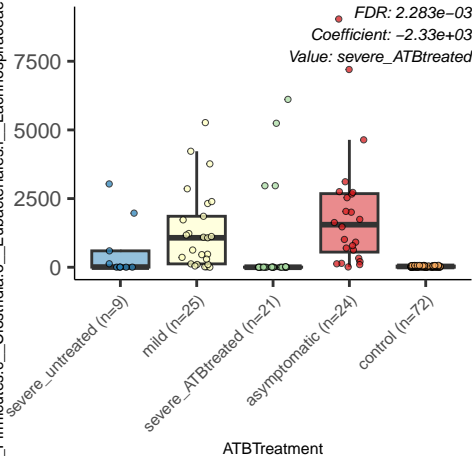

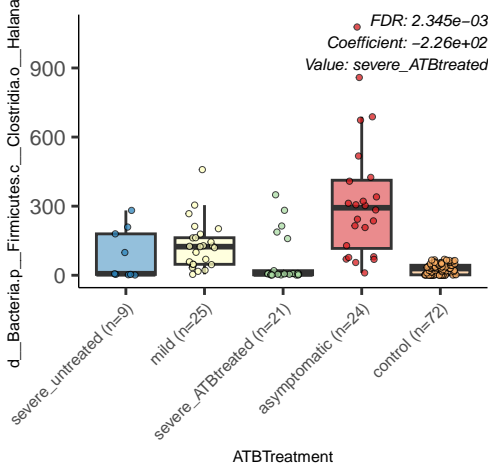



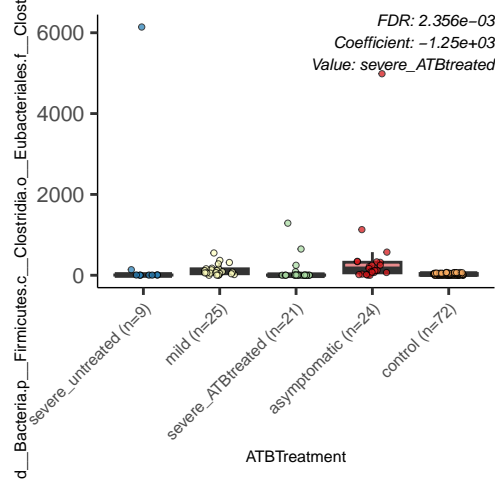

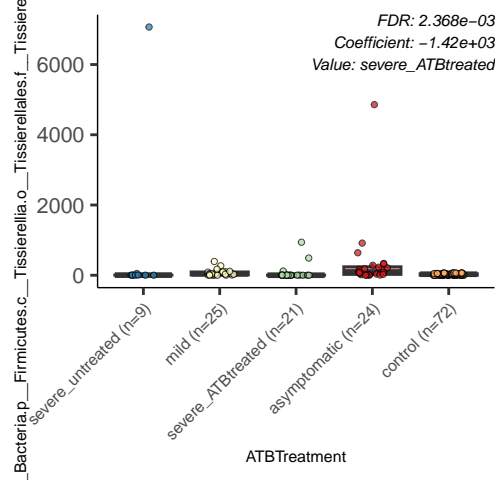

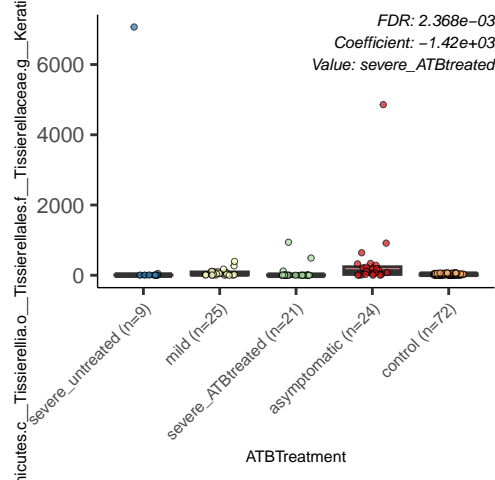

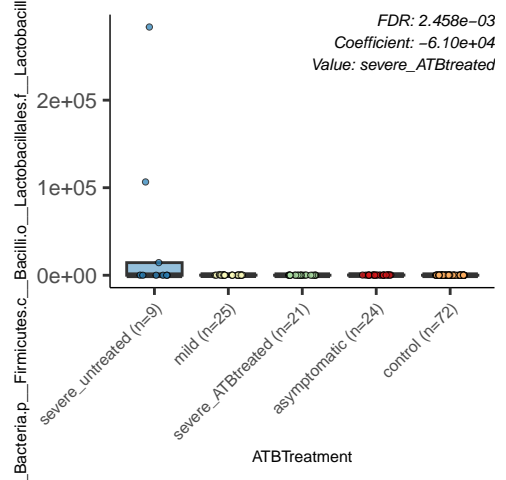

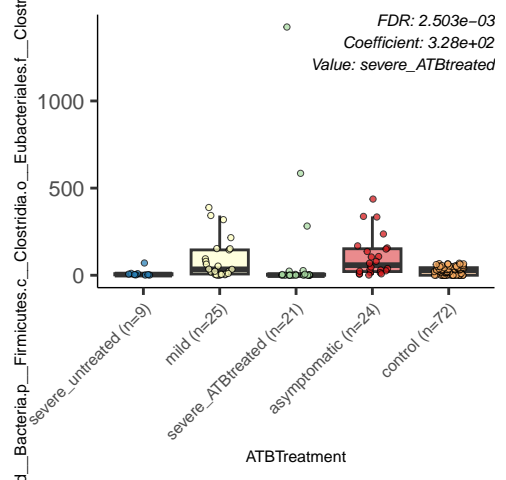

p\_Firmicutes.c\_Clostridia.o\_Eubacteriales.f\_Clostridiaceae.g

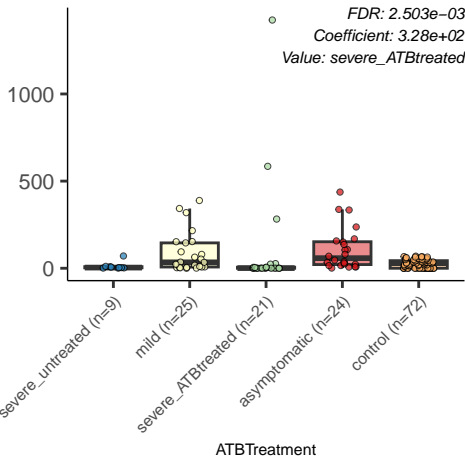

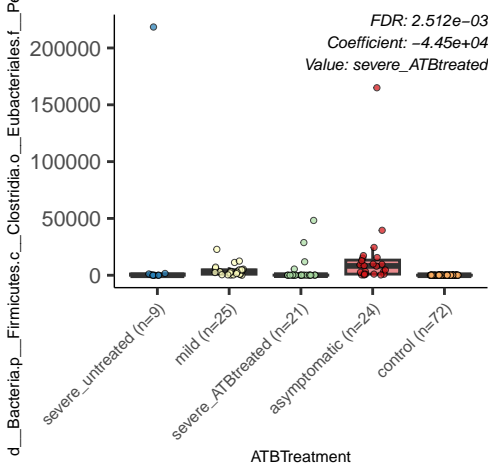

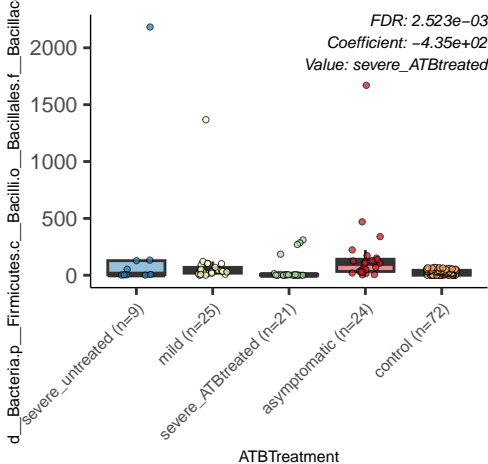



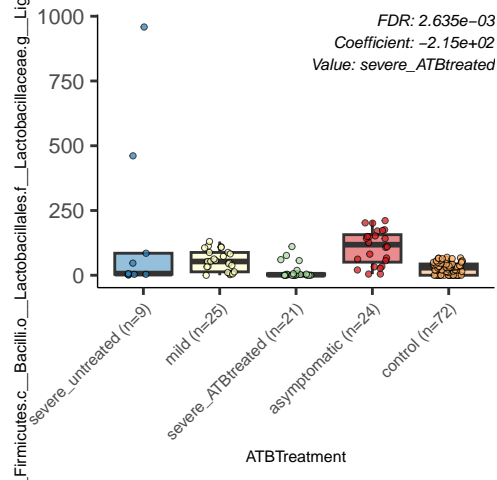

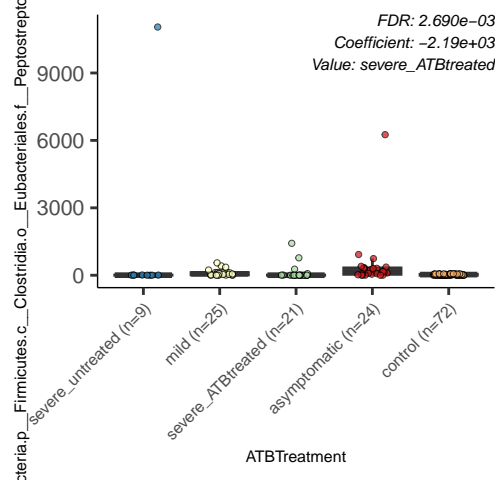

cutes.c\_\_Clostridia.o\_\_Eubacteriales.f\_\_Peptostreptococaceae.g\_\_

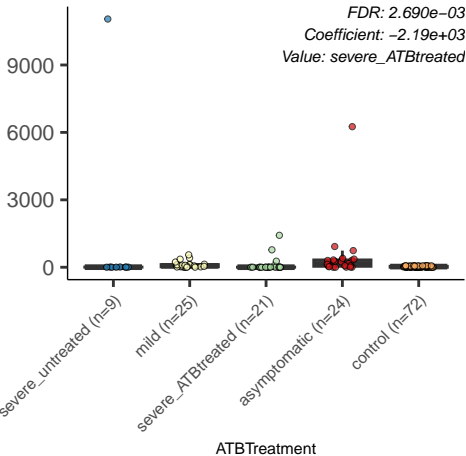

Bacteria.p\_Firmicutes.c\_Bacilli.o\_Lactobacillales.f\_Lactobacilli

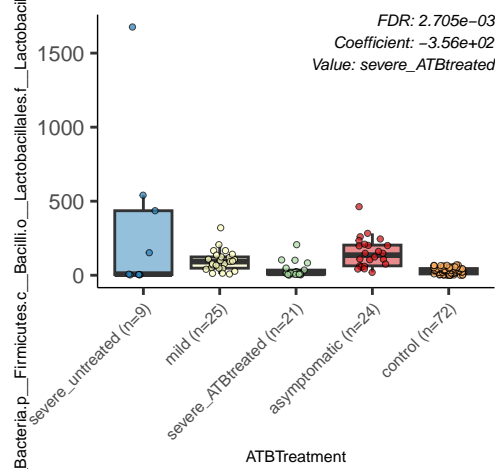

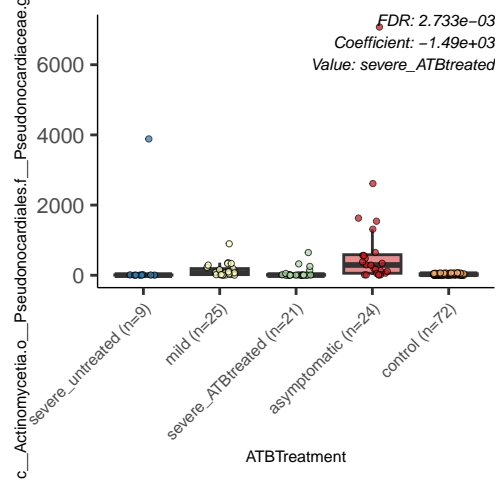

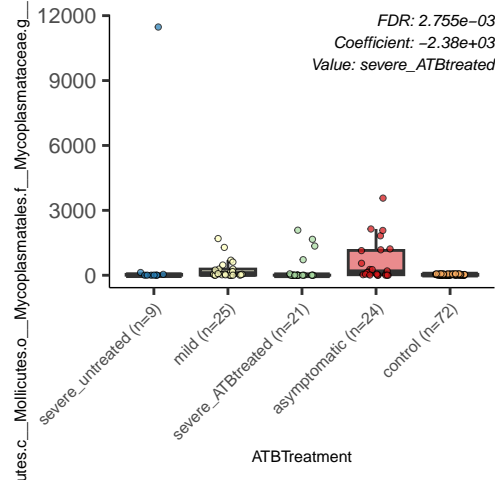

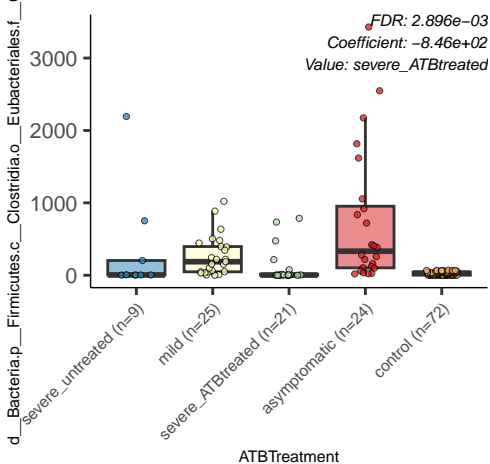

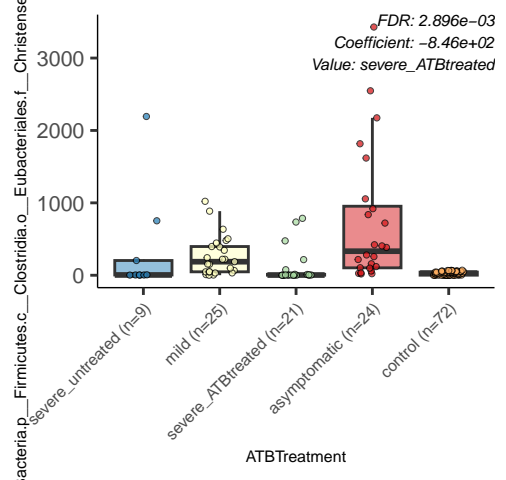



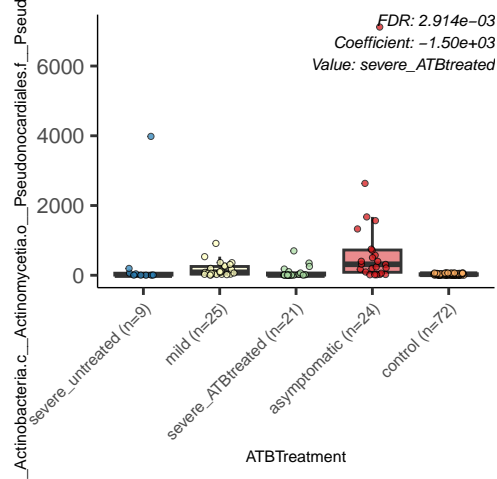

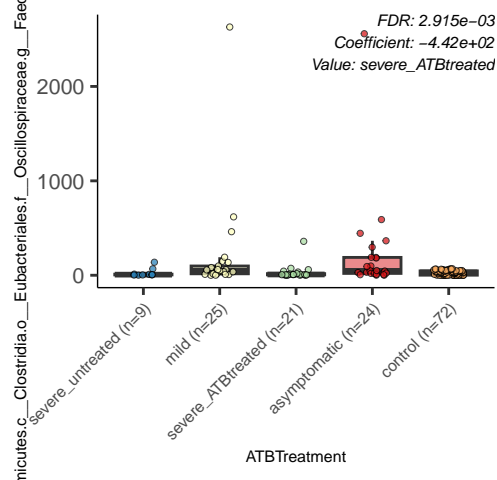

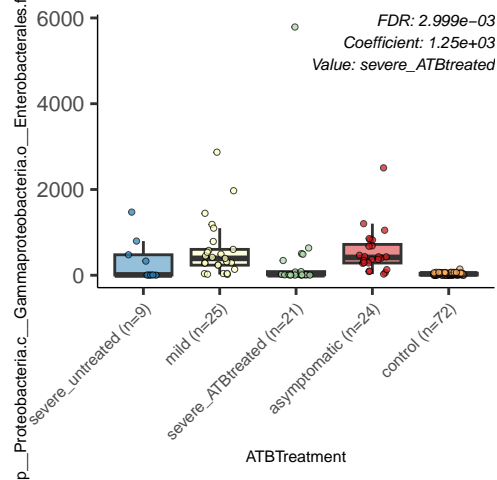

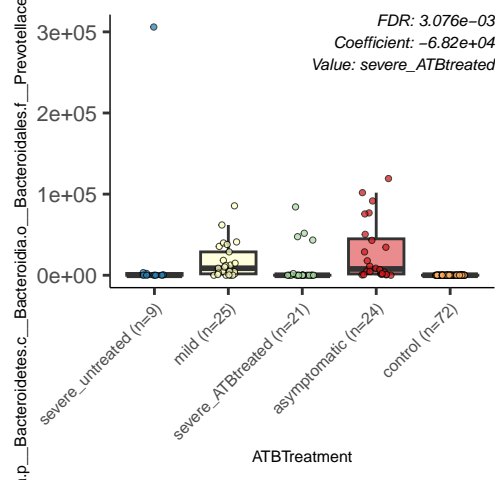

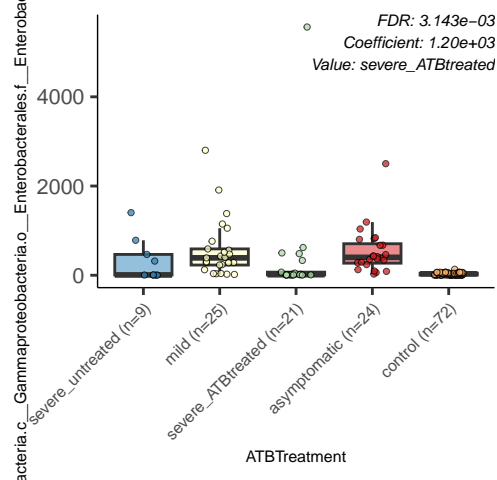

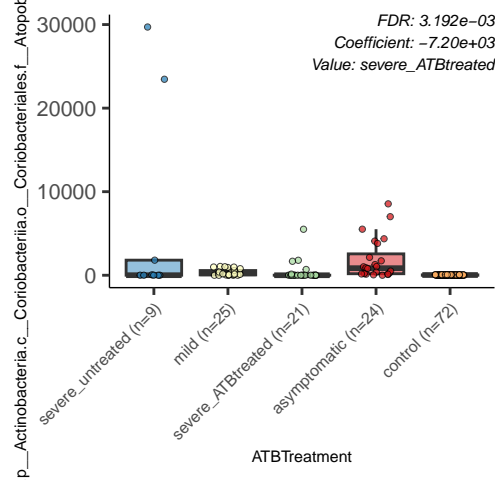

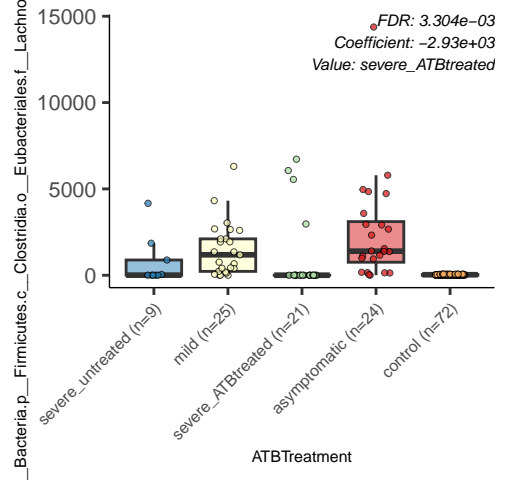

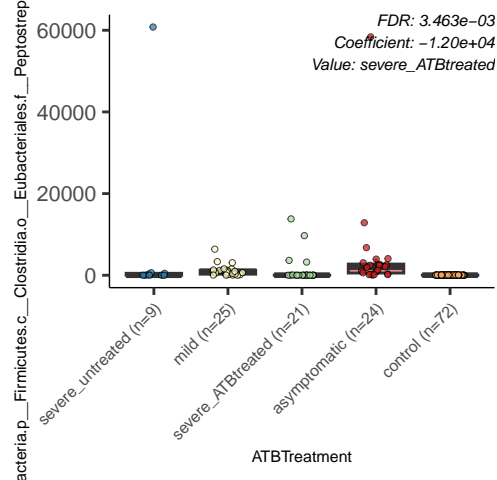



bacteria.p\_\_Firmicutes.c\_\_Clostridia.o\_\_Eubacteriales.f\_\_Peptostreptococcus

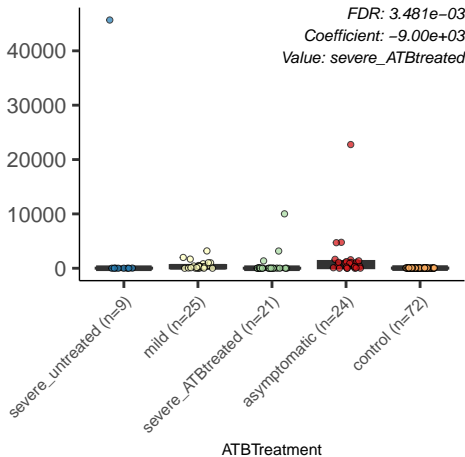

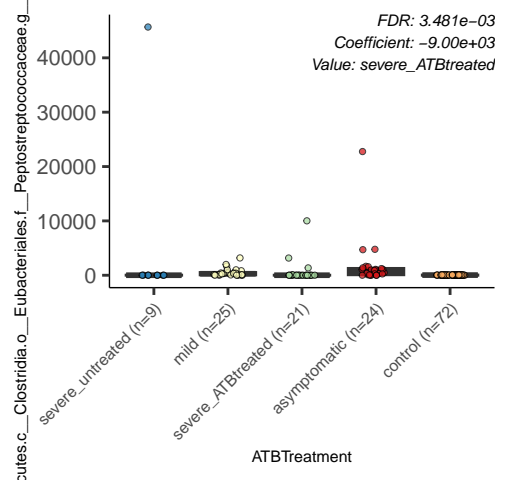

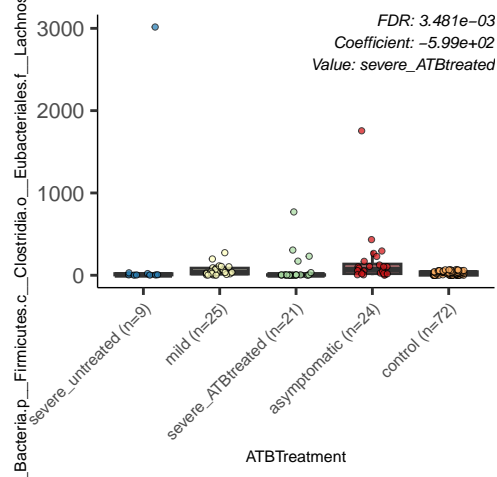

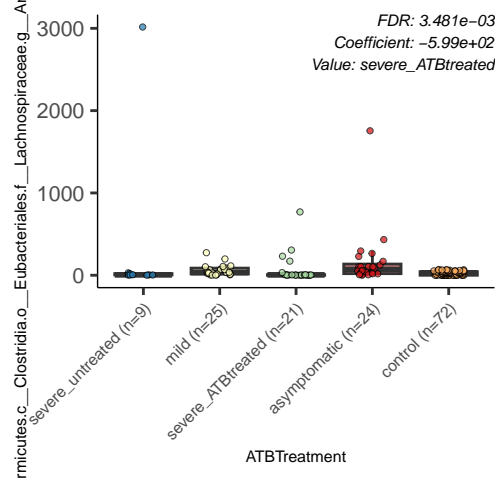

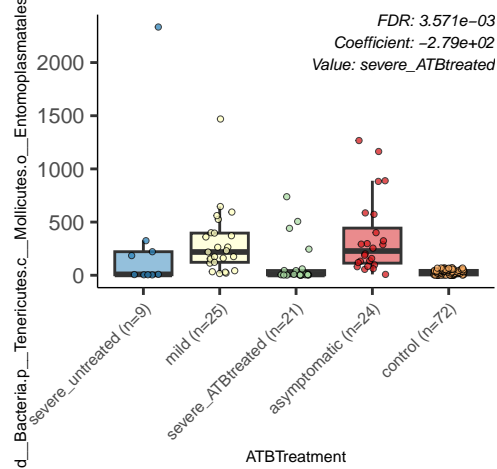

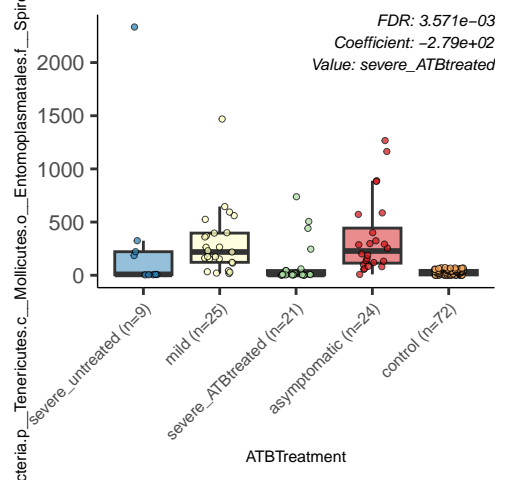

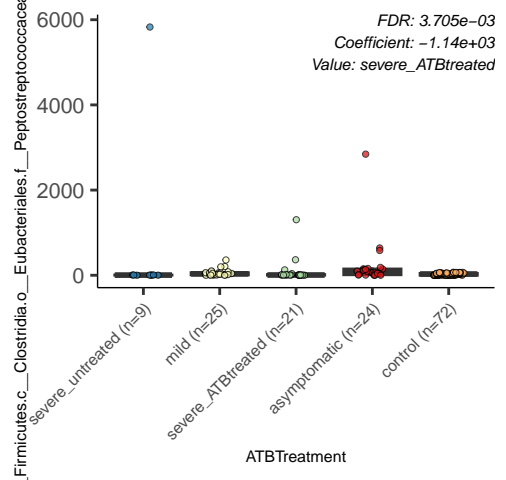

irmicutes.c\_\_Clostridia.o\_\_Eubacteriales.f\_\_Peptostreptococcaceae

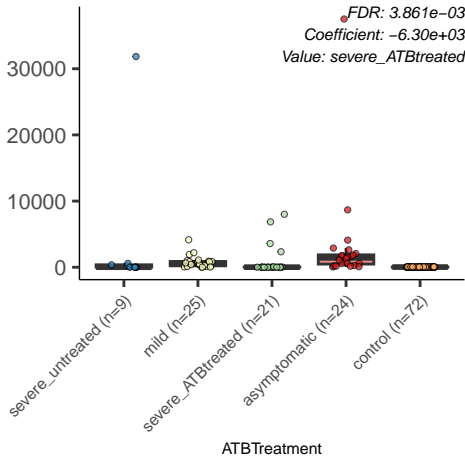



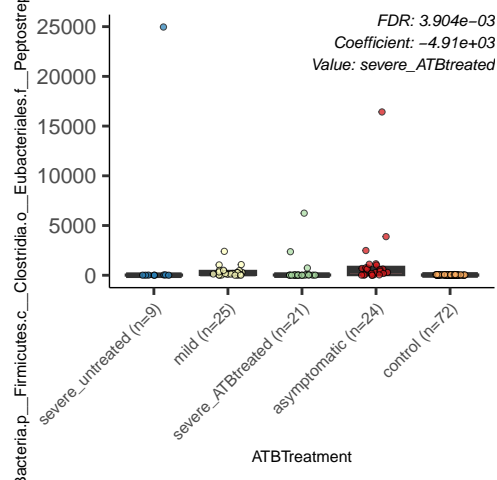

irmicutes.c\_\_Clostridia.o\_\_Eubacteriales.f\_\_Peptostreptococcaceae

FDR:  $3.966e-03$   
Coefficient:  $-1.35e+03$   
Value: severe\_ATBtreated

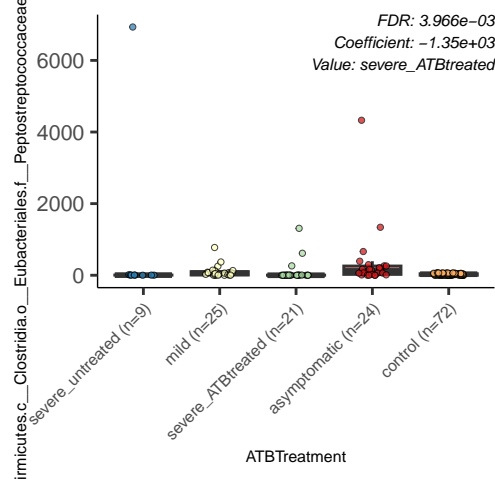

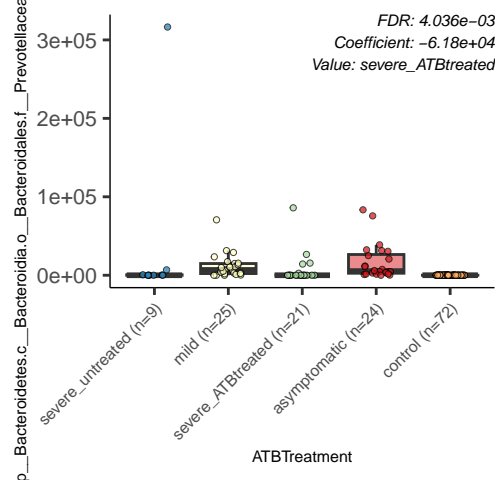

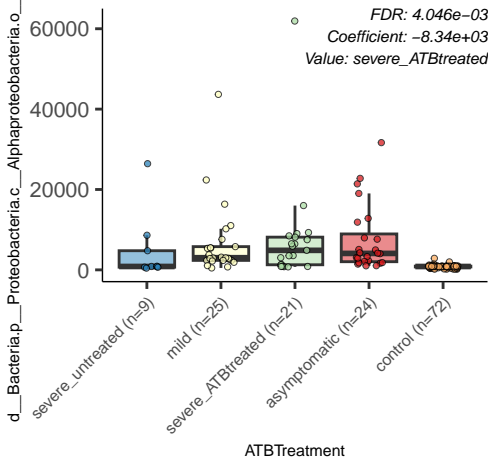

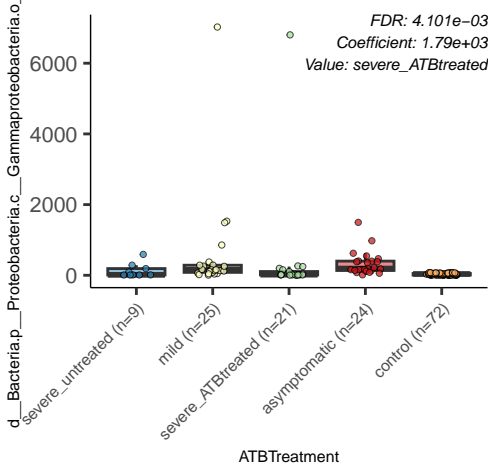

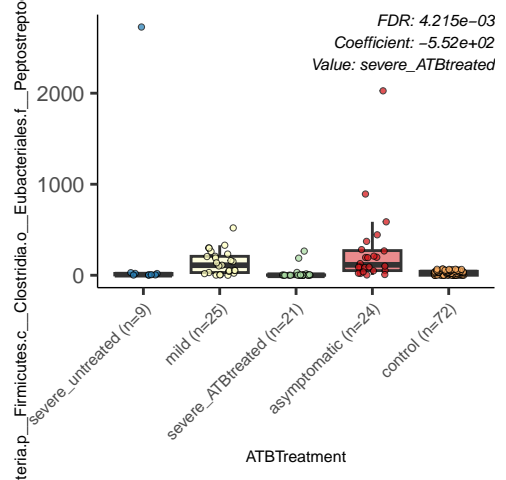

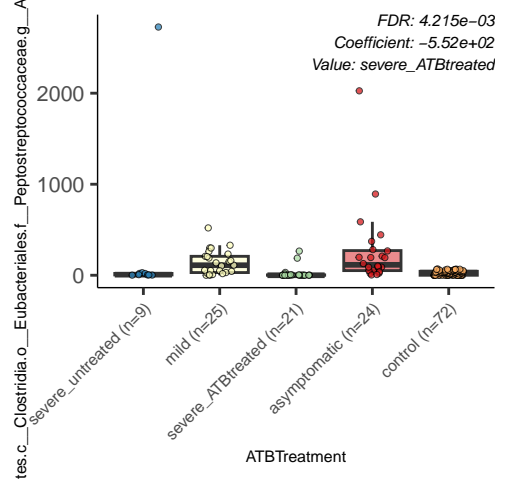

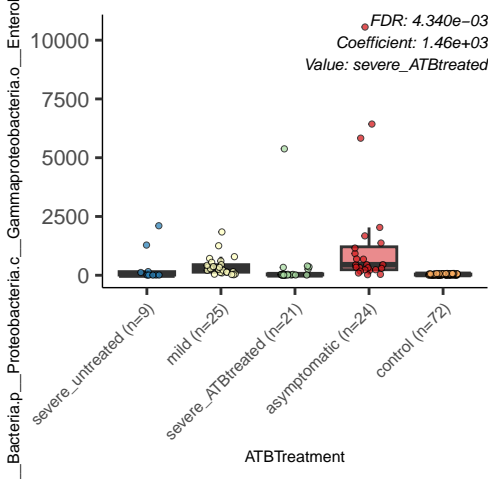



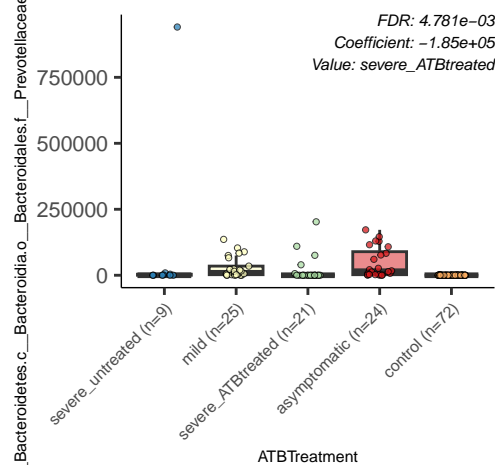

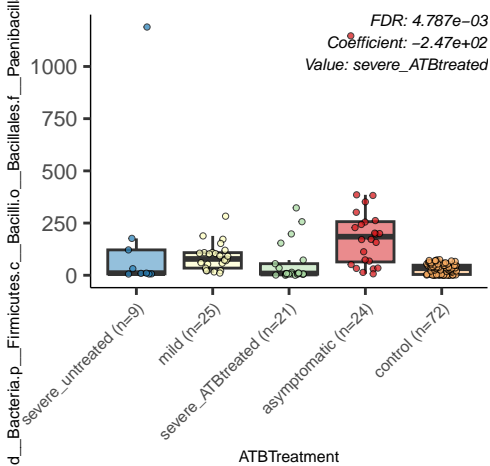

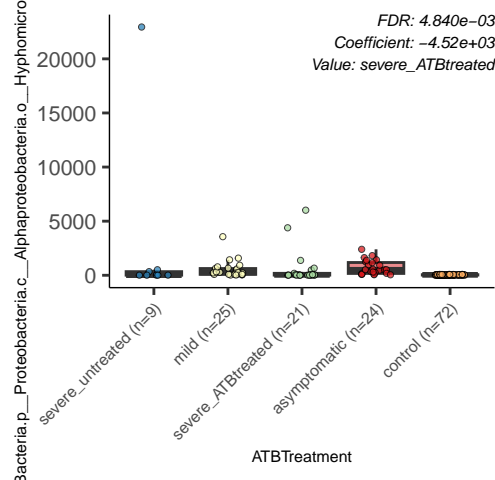

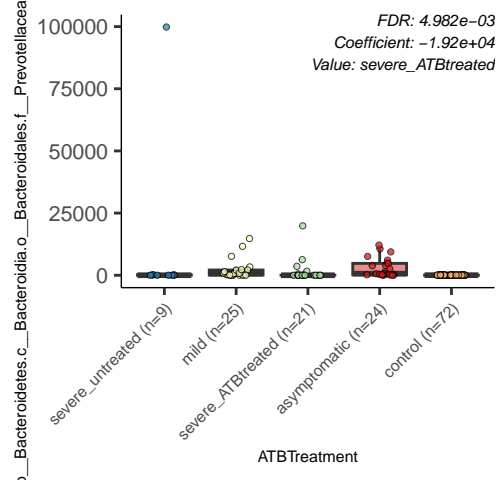

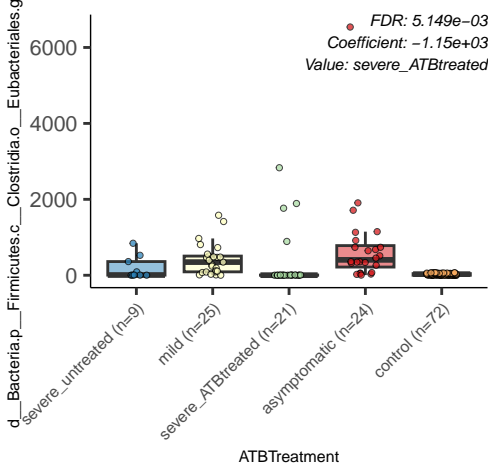

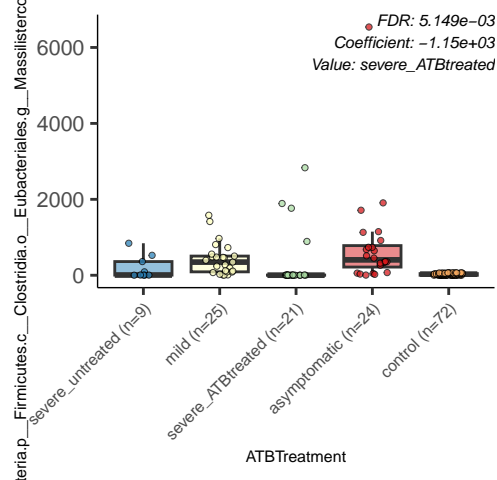



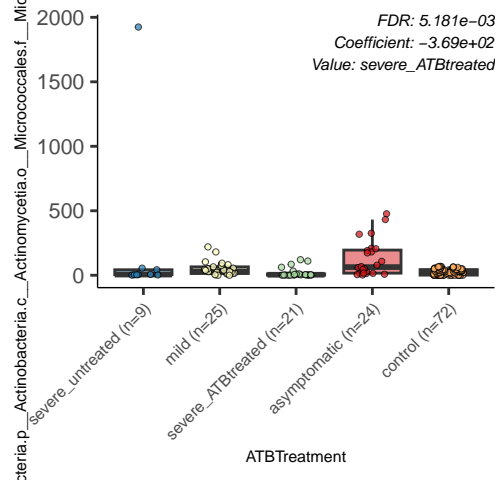



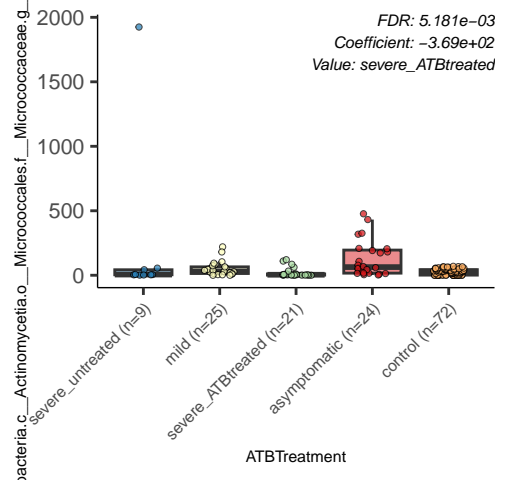

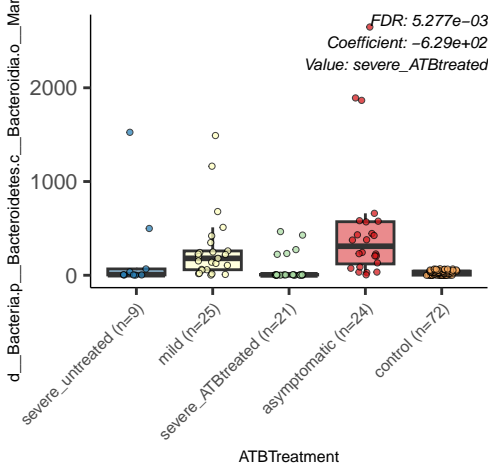

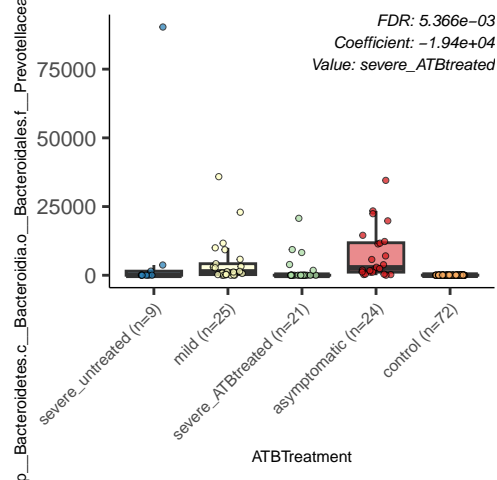

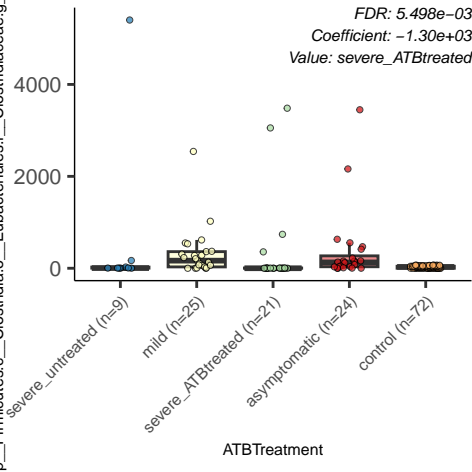

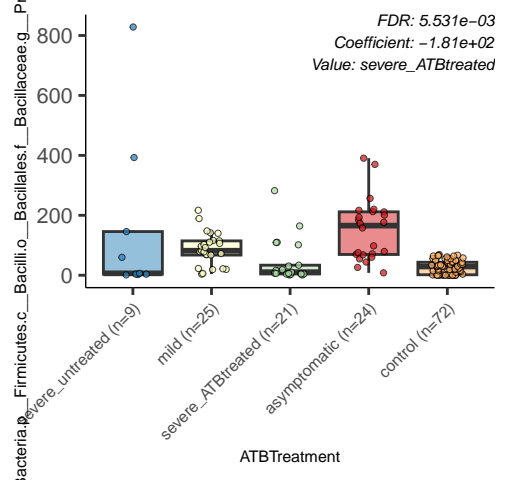

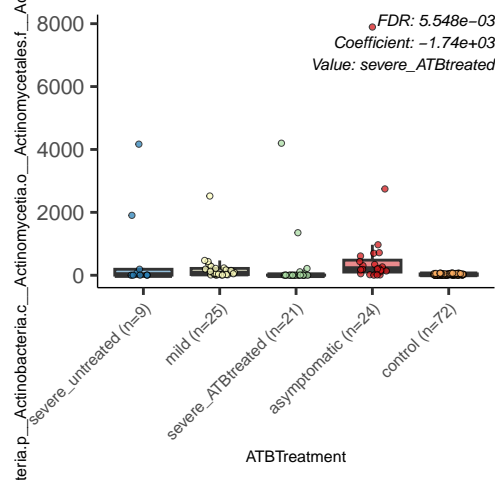

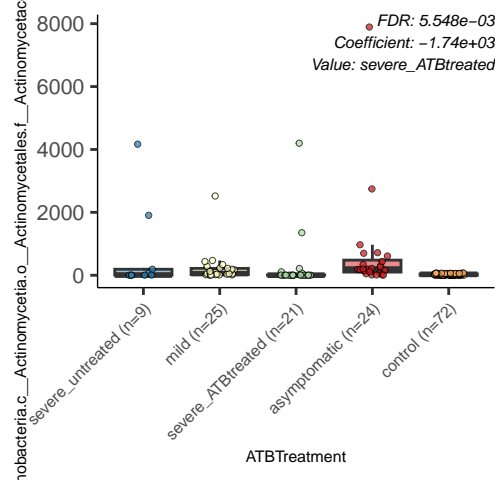

p\_\_Bacteroidetes.c\_\_Bacteroidia.o\_\_Bacteroidales.f\_\_Prevotellaceae

FDR:  $5.561e-03$   
Coefficient:  $-6.48e+04$   
Value: severe\_ATBtreated

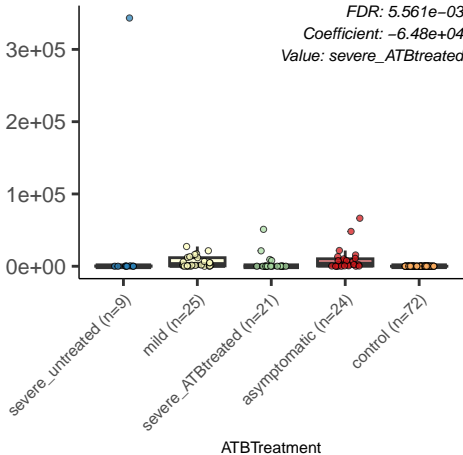



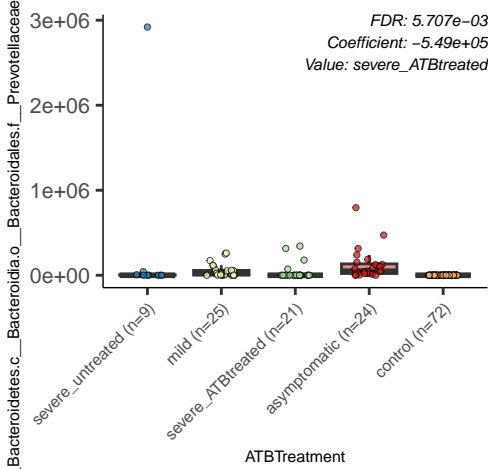

Firmicutes.c\_\_Bacilli.o\_\_Lactobacillales.f\_\_Streptococcaceae.g\_\_Str

FDR:  $5.829 \times 10^{-3}$   
Coefficient:  $1.35 \times 10^4$   
Value: severe\_ATBtreated

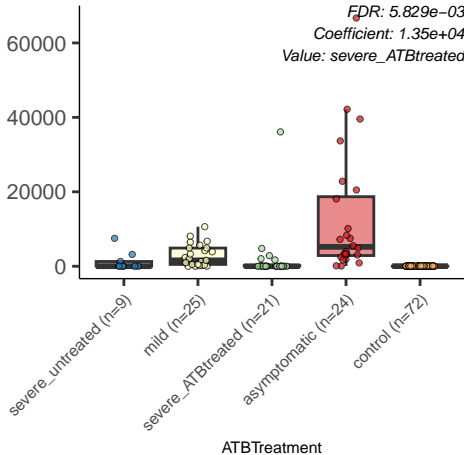

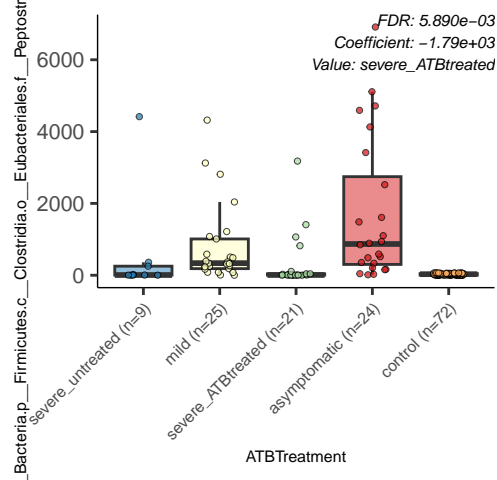

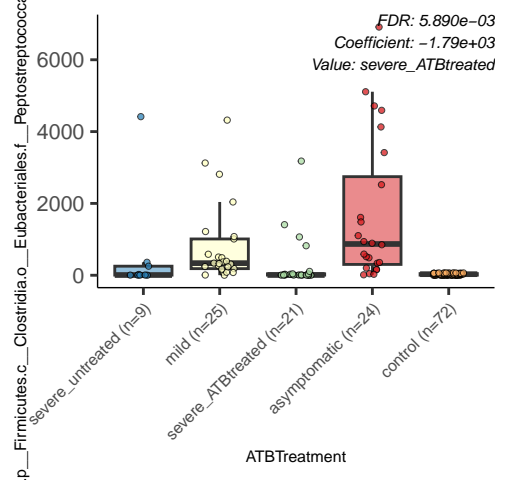

a.p.\_Bacteroidetes.c.\_Bacteroidia.o.\_Bacteroidales.f.\_Prevotellac

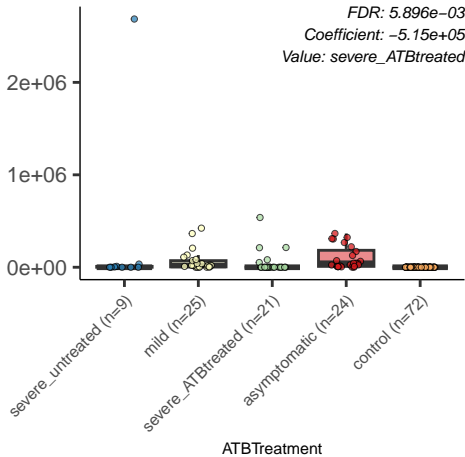

a.p\_\_Proteobacteria.c\_\_Gammaproteobacteria.o\_\_Alteromonadales

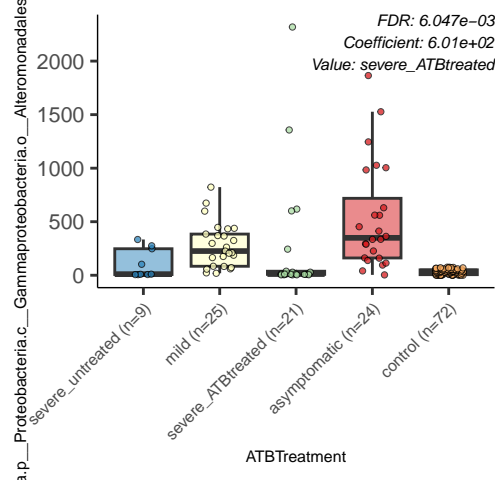

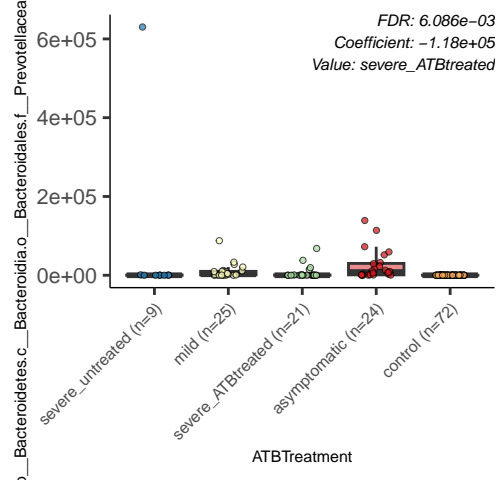

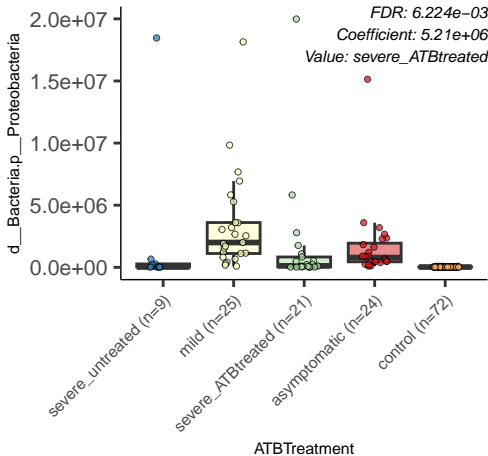



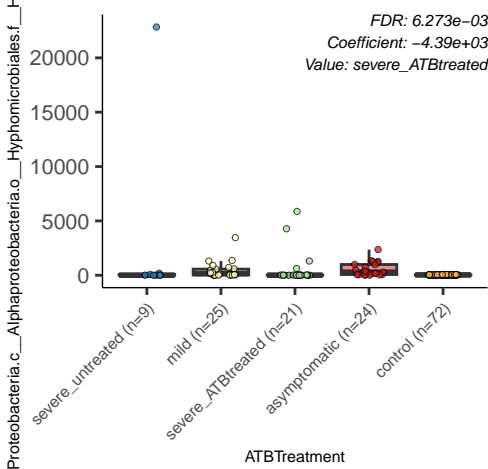

c\_\_Alphaproteobacteria.o\_\_Hyphomicrobiales.f\_\_Hyphomicrobiaceae

FDR:  $6.304e-03$   
Coefficient:  $-4.39e+03$   
Value: severe\_ATBtreated

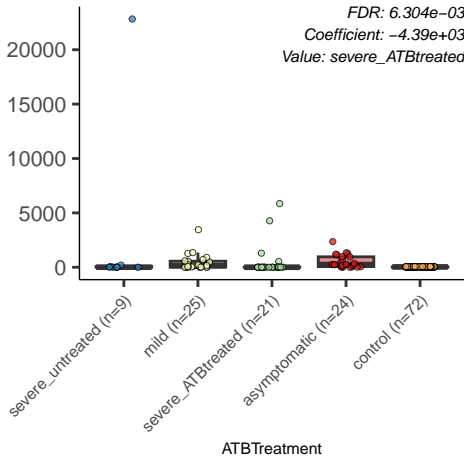

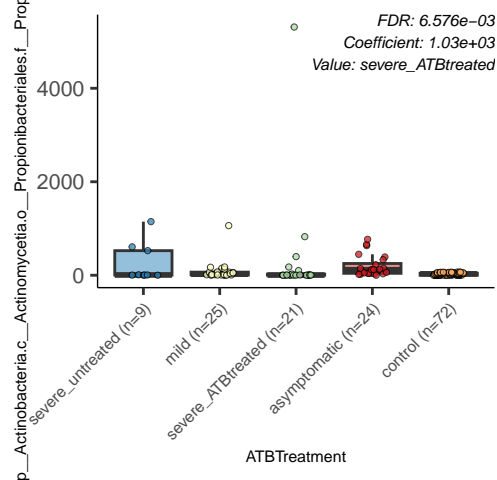

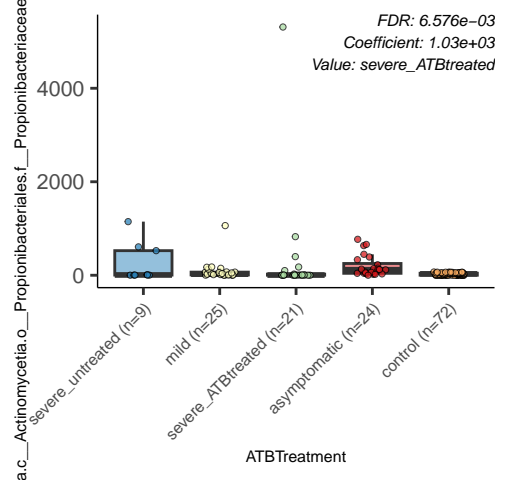

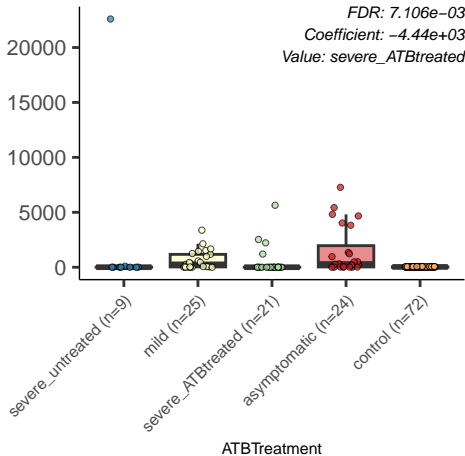

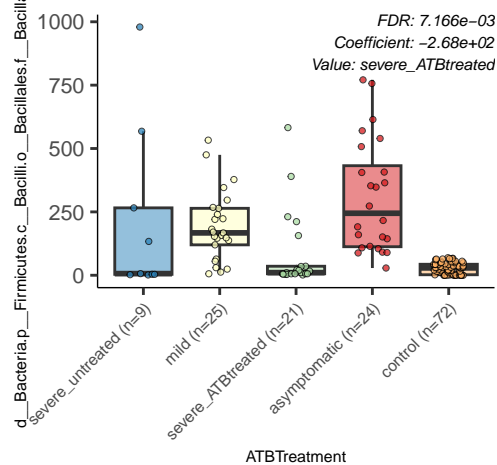

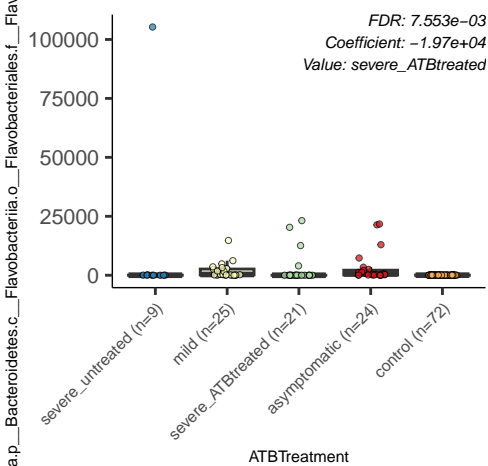

p\_\_Proteobacteria.c\_\_Gammaproteobacteria.o\_\_Enterobacterales.f

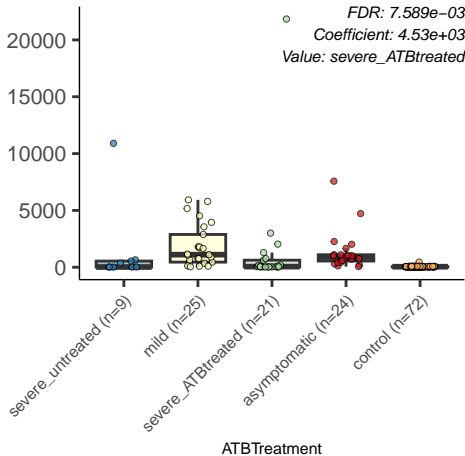



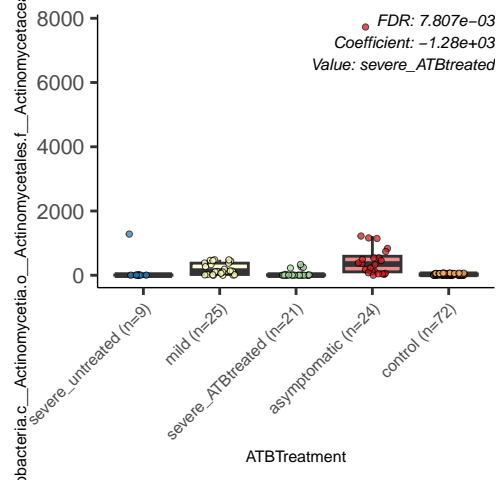

Firmicutes.c\_Bacilli.o\_Lactobacillales.f\_Lactobacillaceae.g\_La

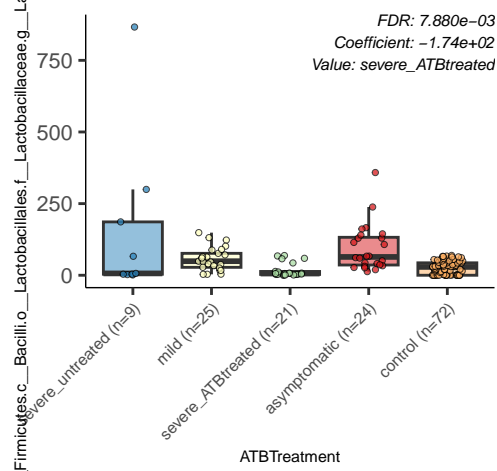

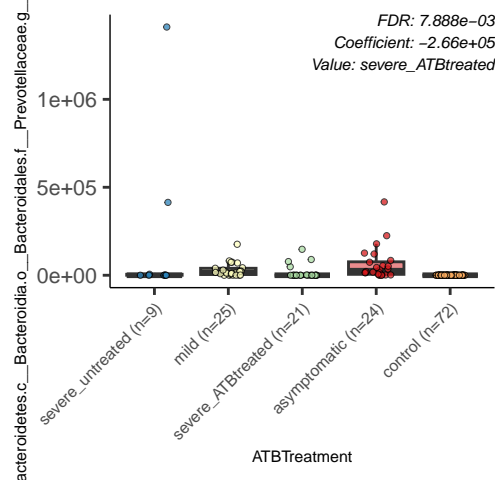

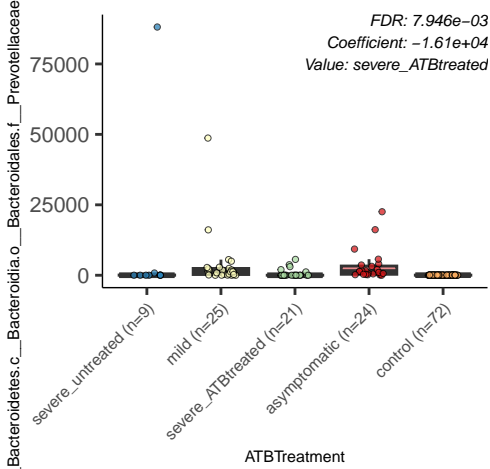

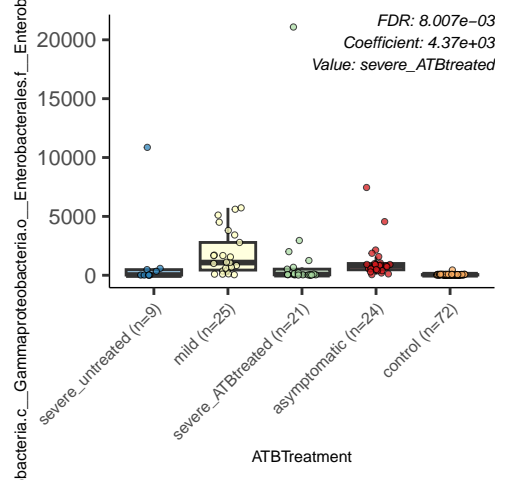

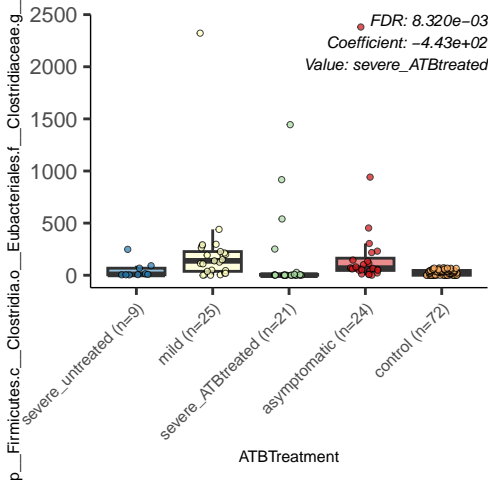

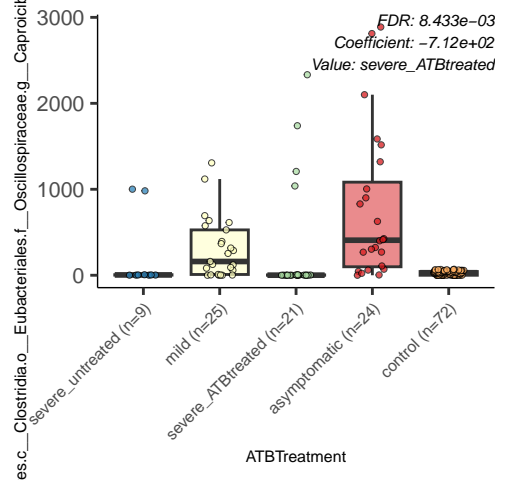

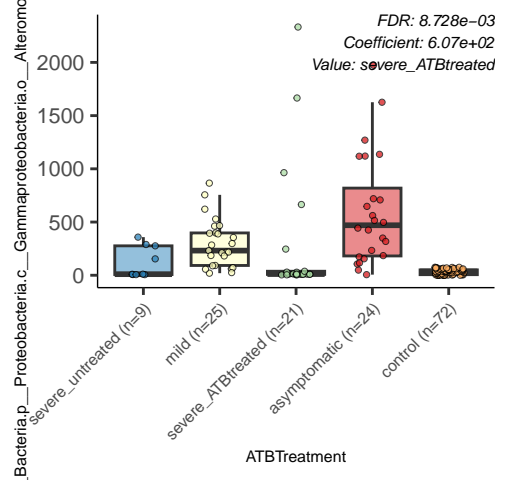



Actinobacteria.c\_Actinomyces.f\_Actinomyces

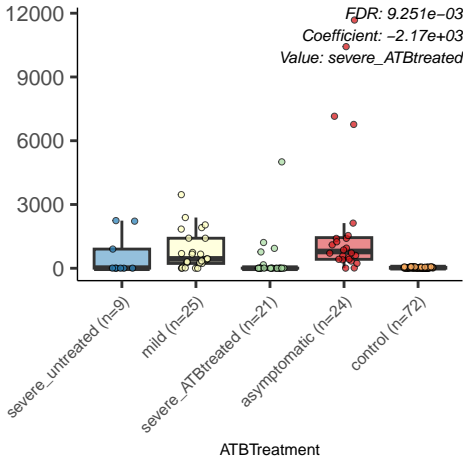

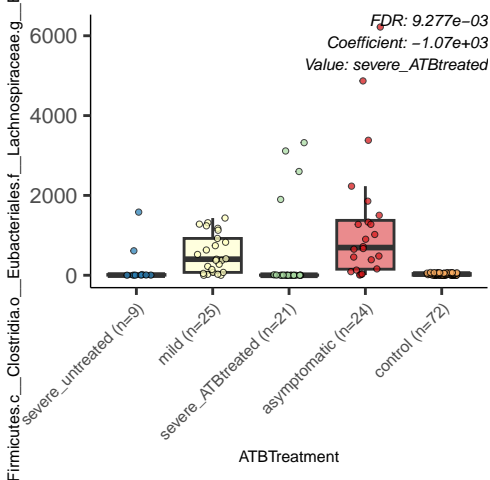

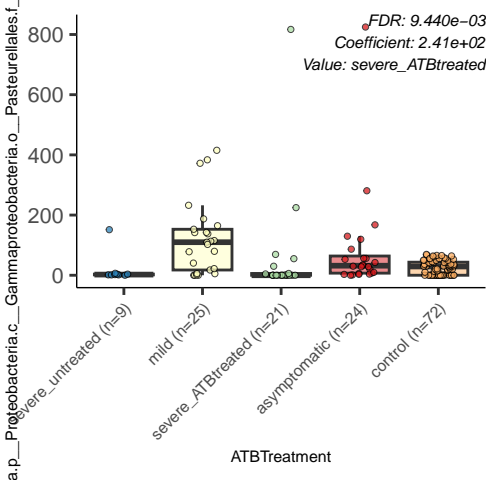

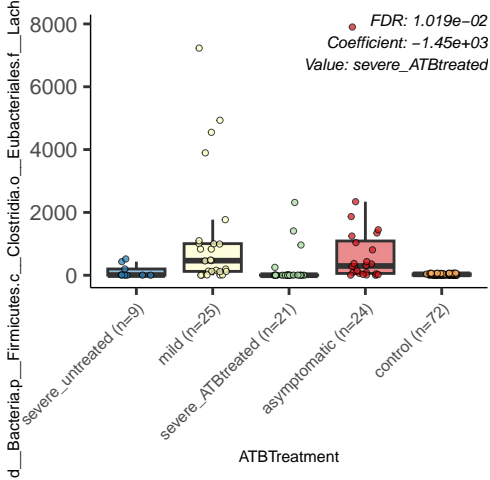

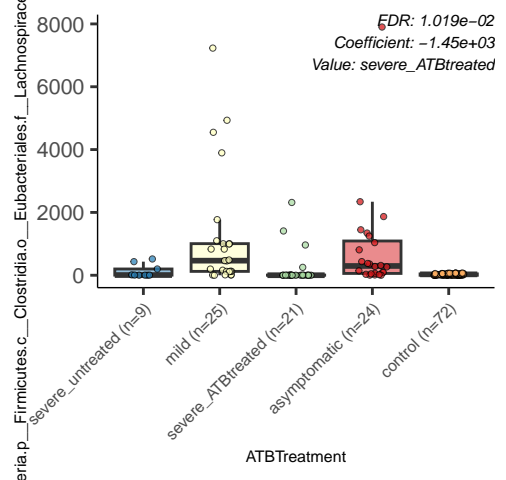

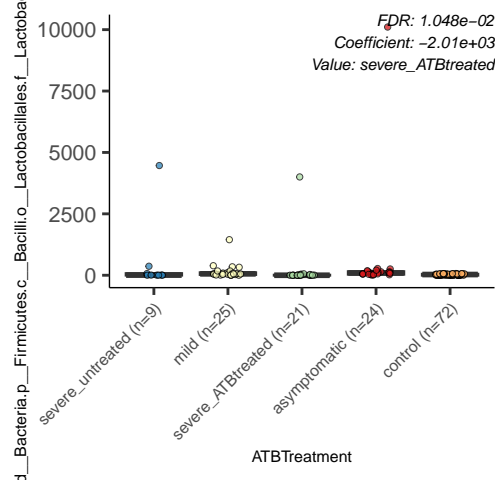

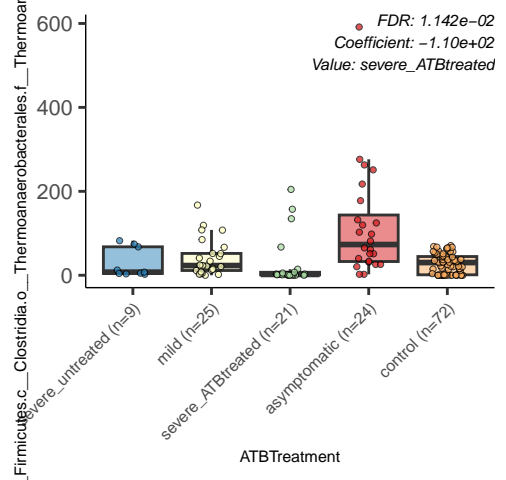

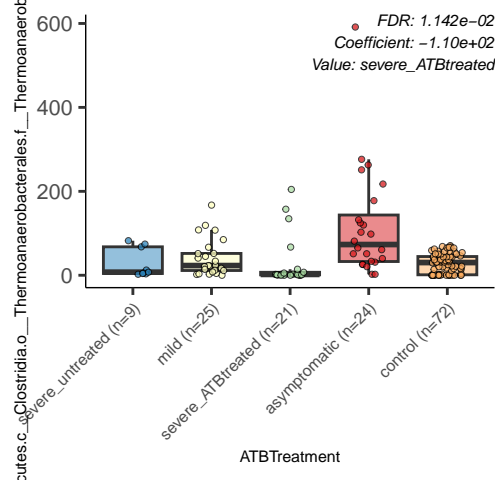



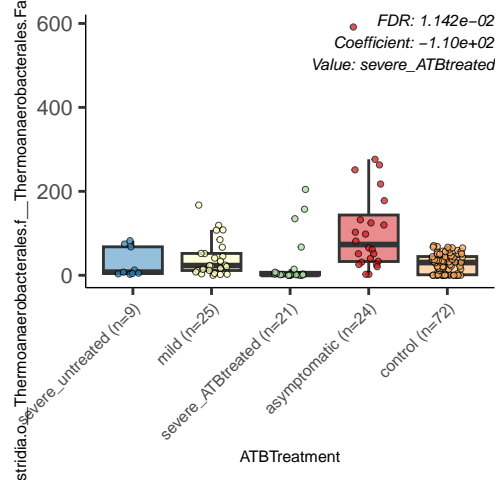

Gammaproteobacteria.o\_\_Cardiobacteriales.f\_\_Cardiobacteriaceae.

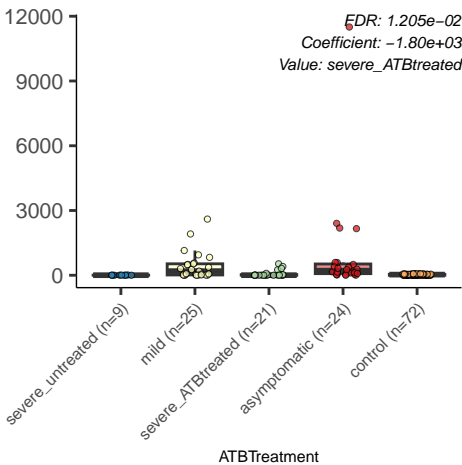

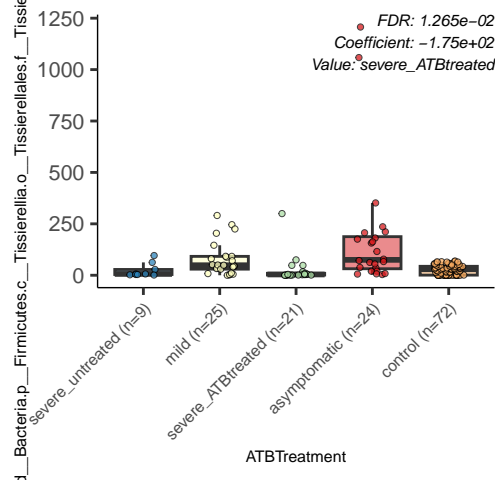

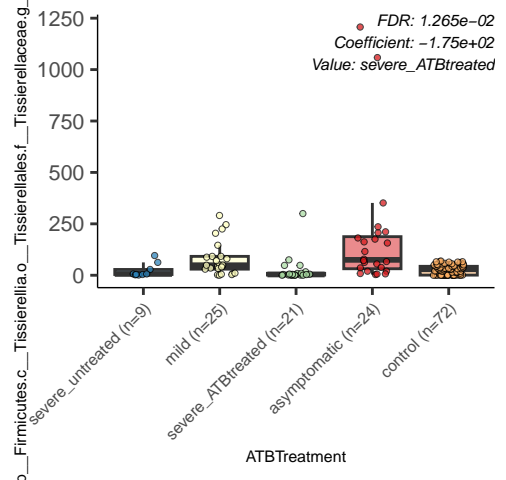

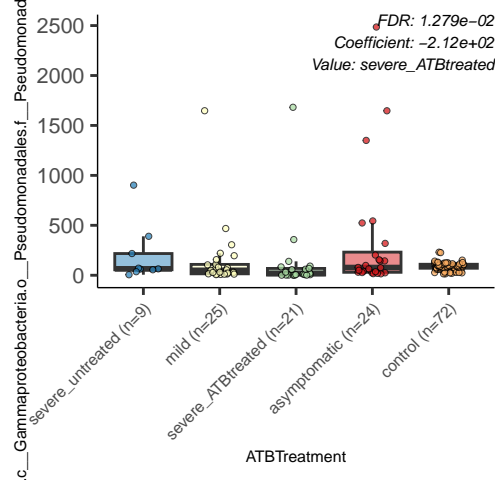

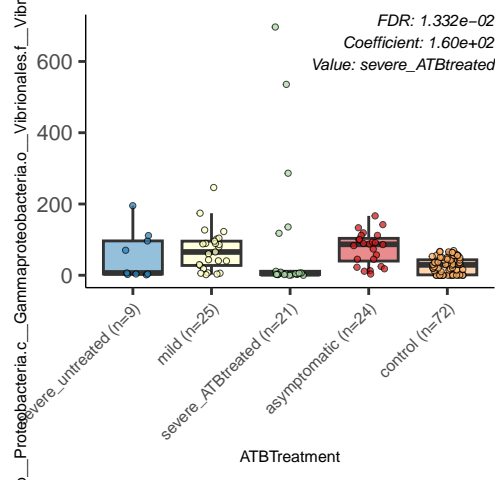

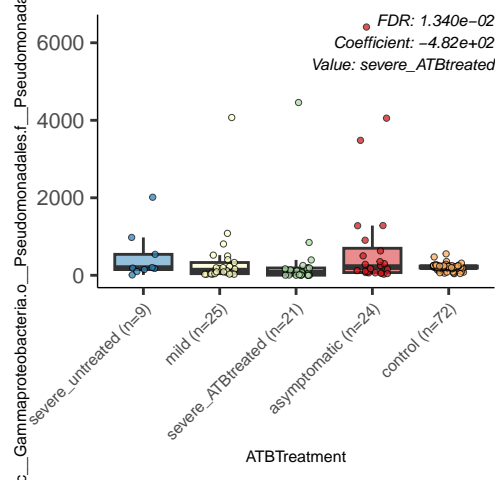

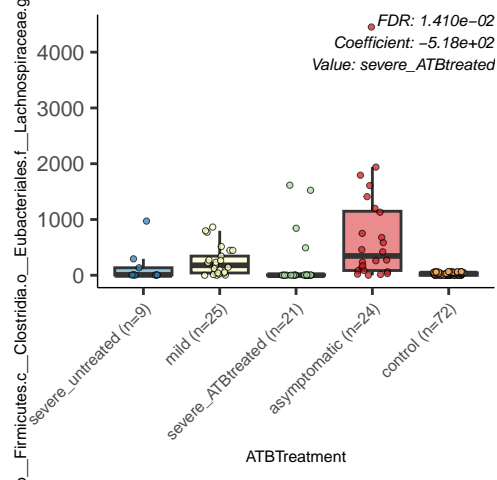



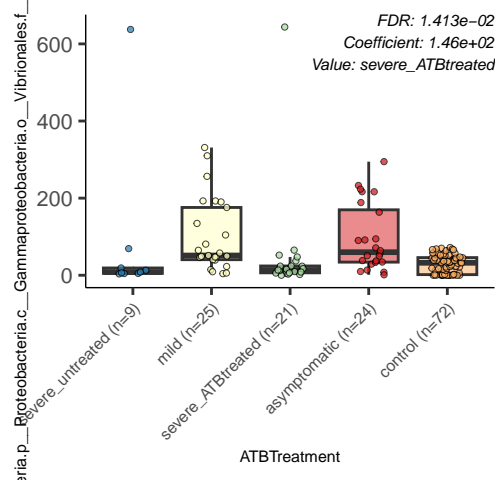

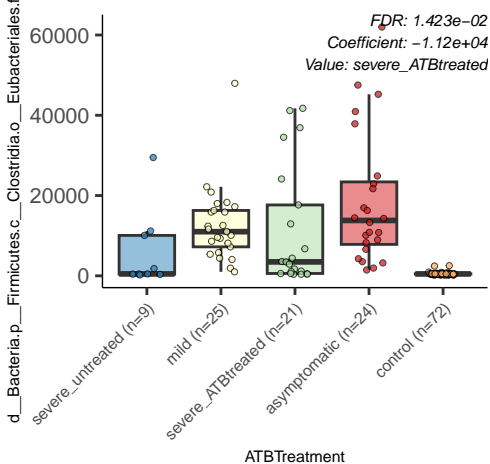

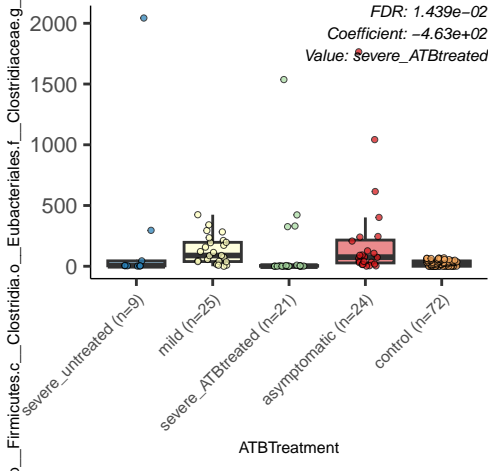

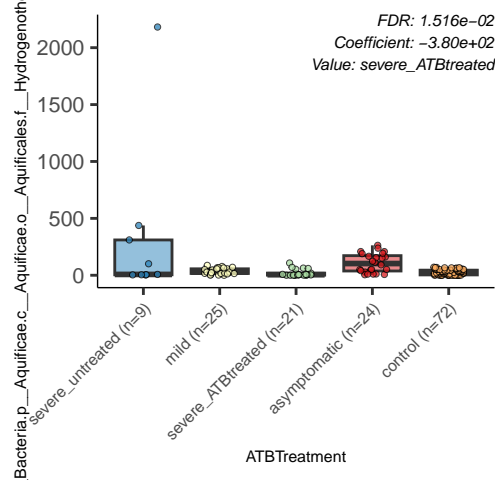

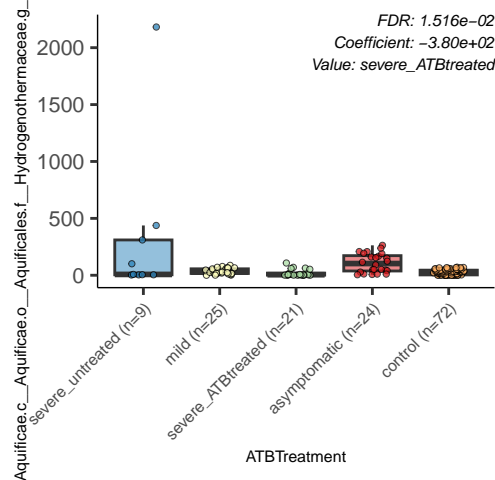

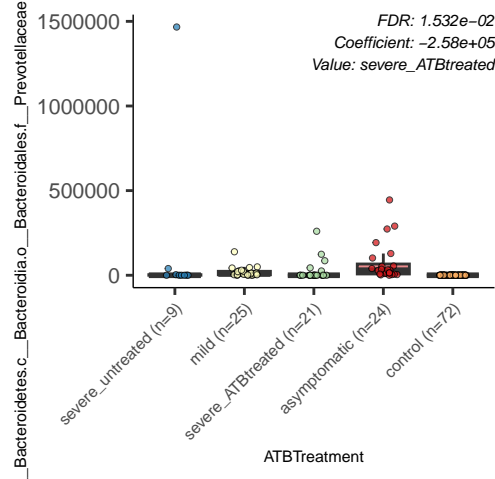

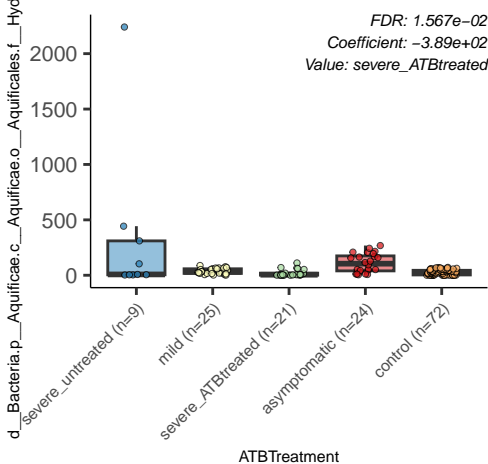

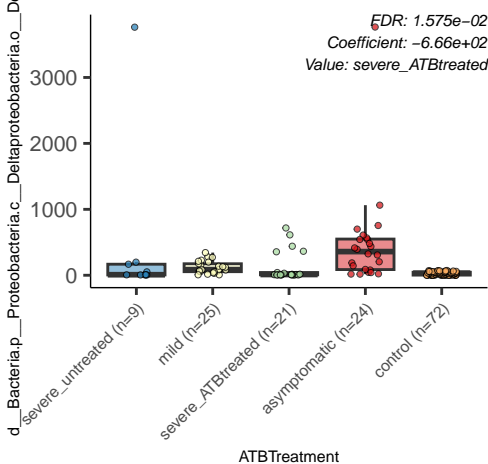



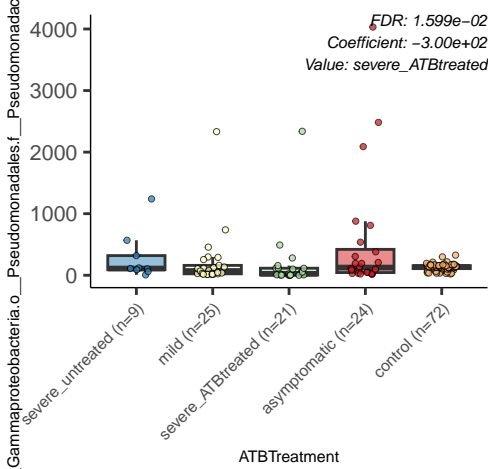

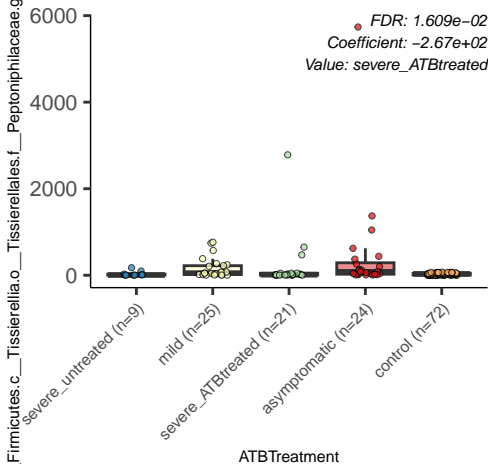

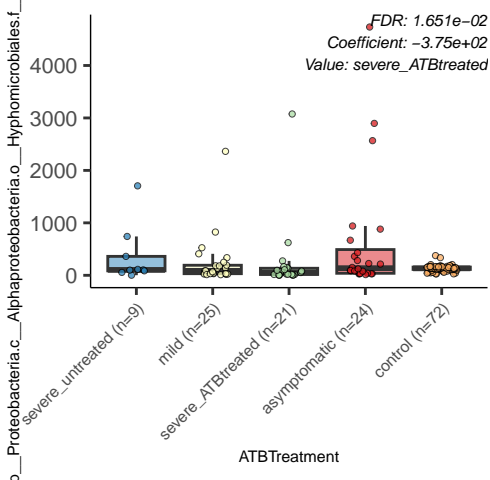

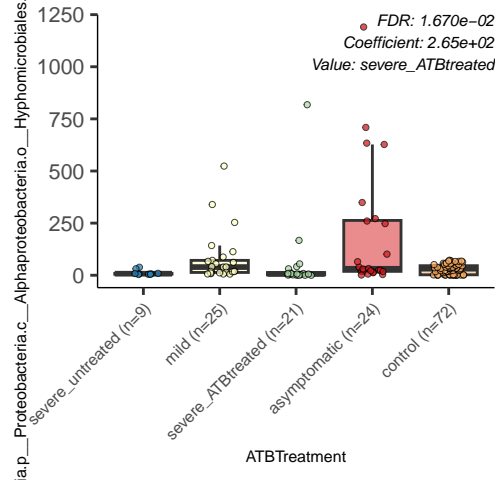

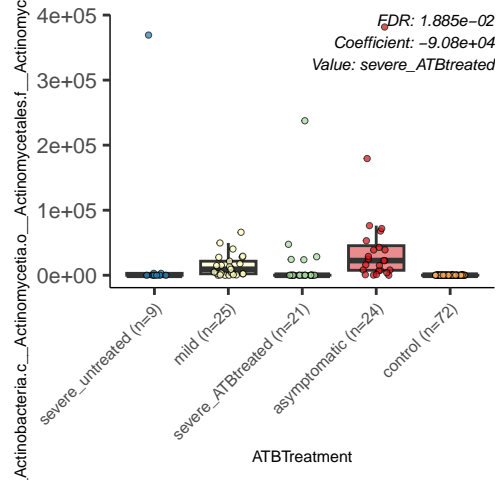

Bacteroidetes.c\_\_Bacteroidia.o\_\_Bacteroidales.f\_\_Bacteroidaceae.

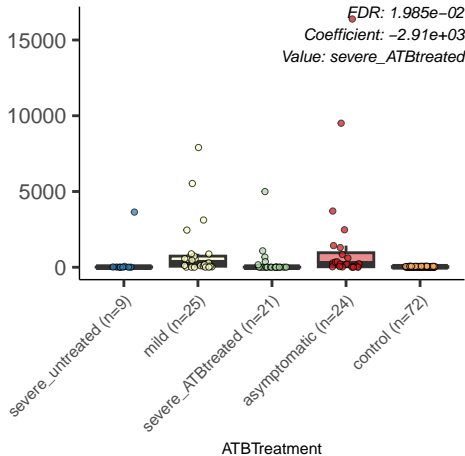

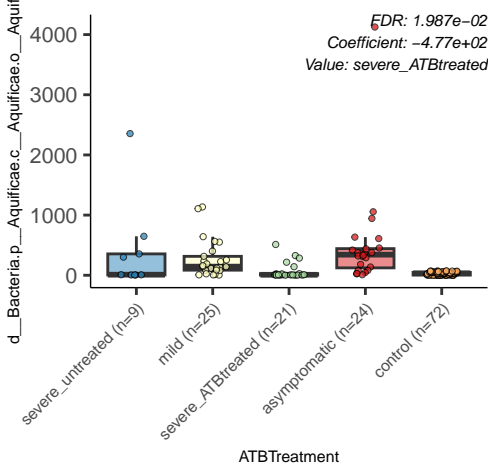

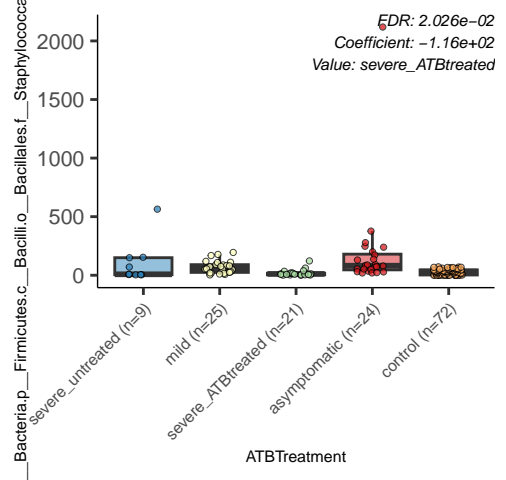



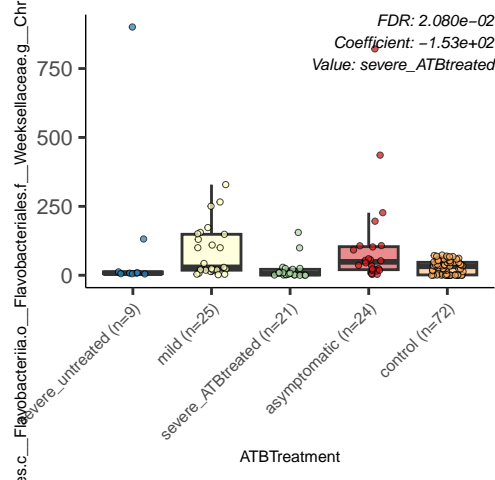

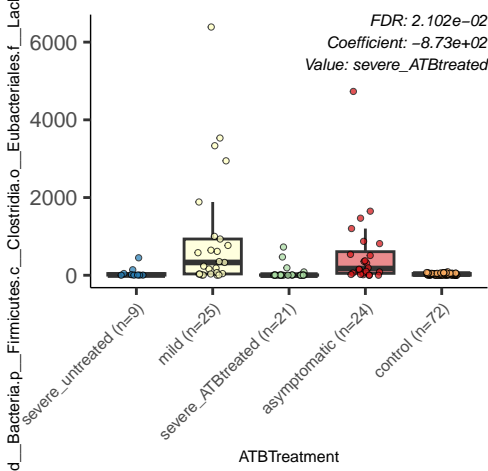

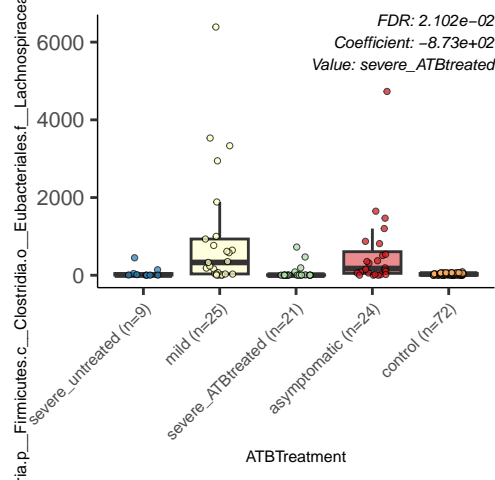

Bacteria.p\_\_Proteobacteria.c\_\_Gammaproteobacteria.o\_\_Vibrionaceae

FDR:  $2.145 \times 10^{-2}$   
Coefficient:  $1.21 \times 10^3$   
Value: severe\_ATBtreated

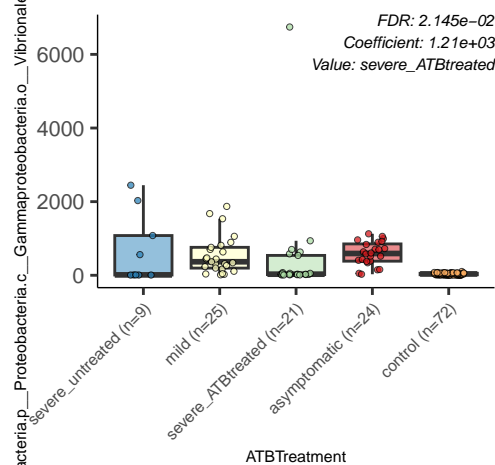

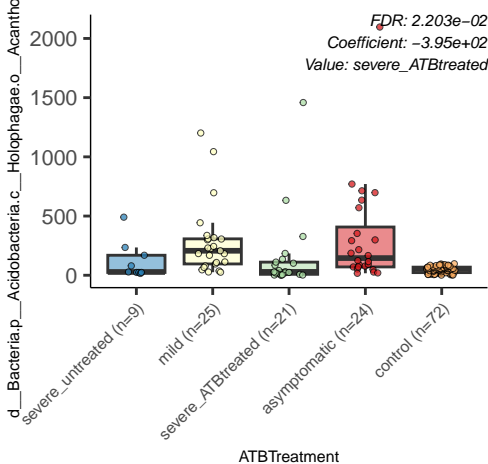

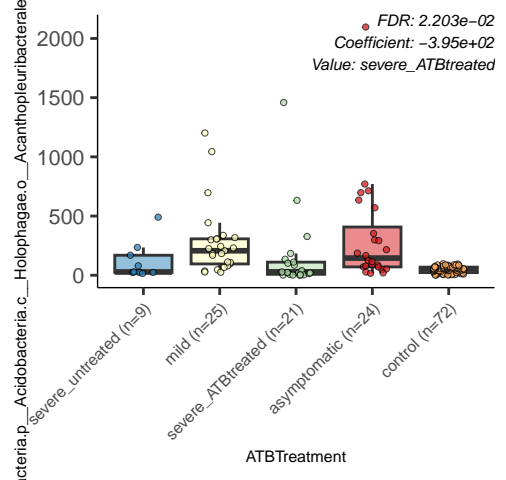

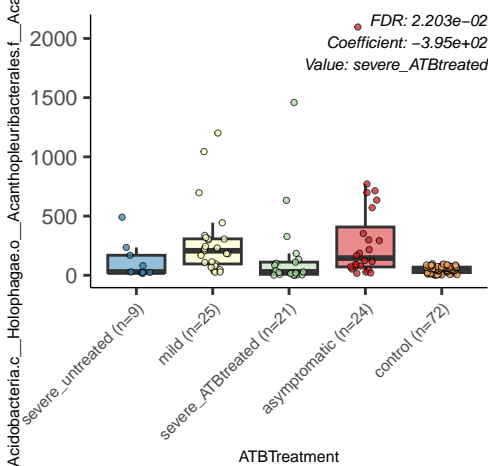

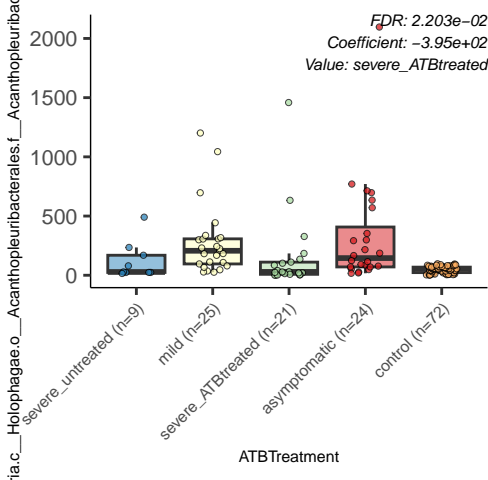



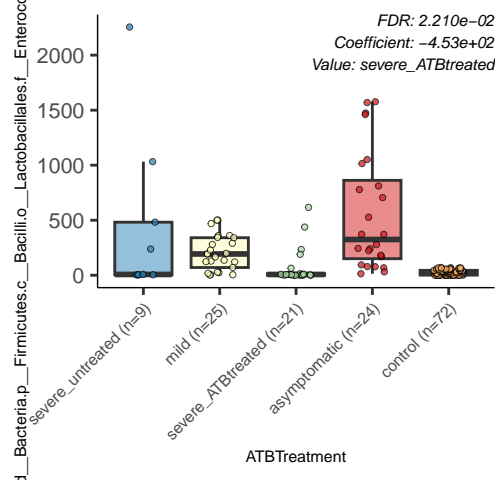

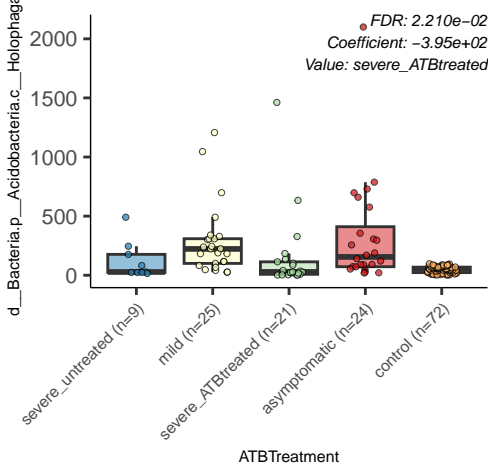

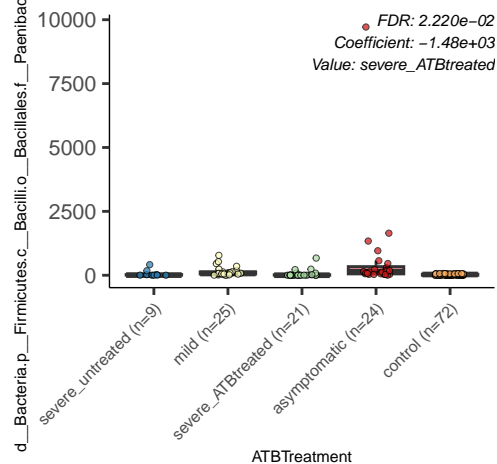

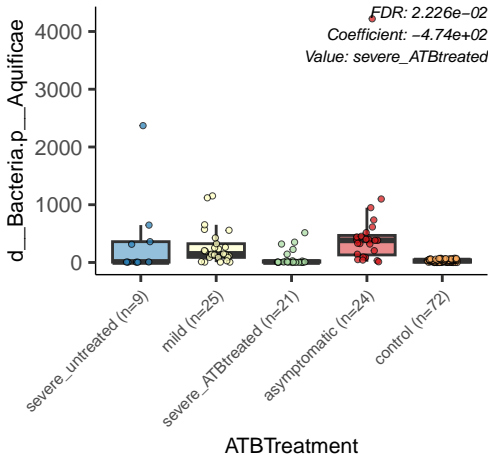

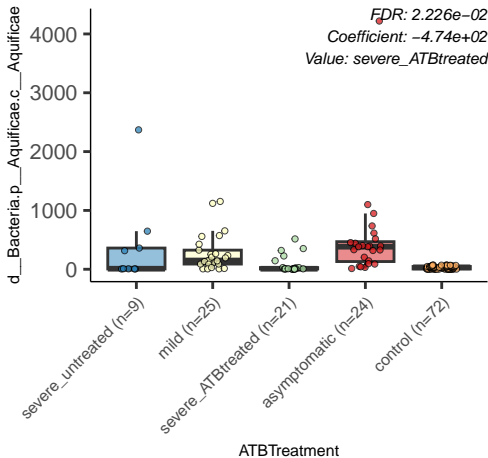

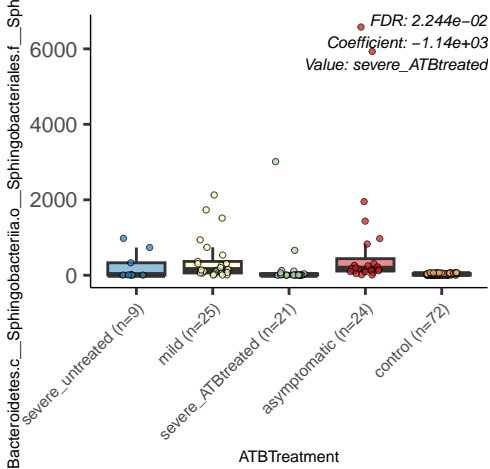

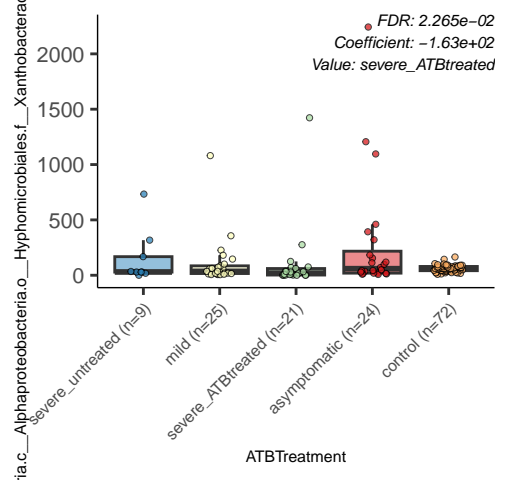

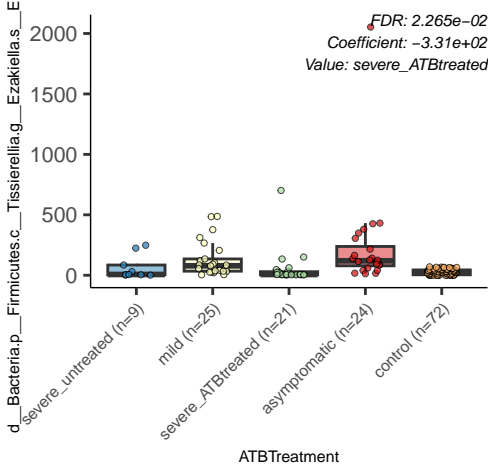



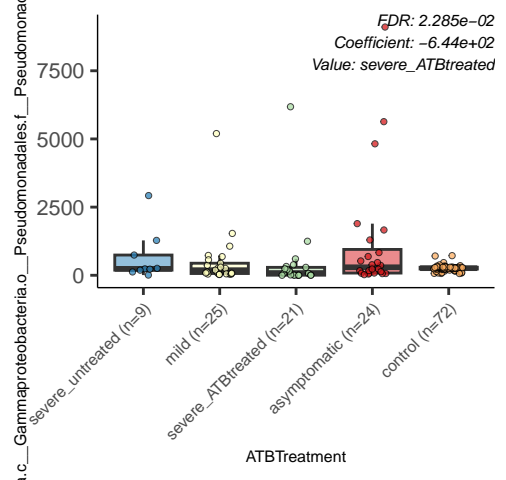

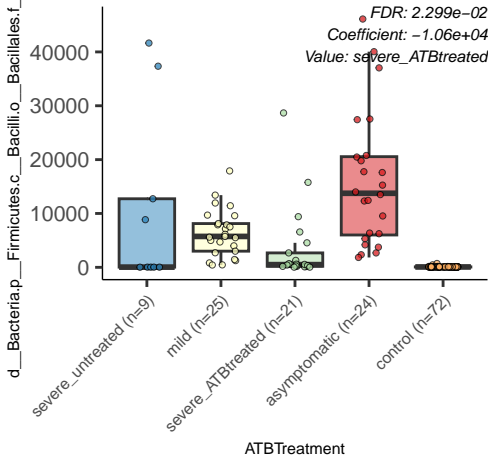

Bacteria.p\_Bacteroidetes.c\_Bacteroidia.o\_Marinilabiales.f\_Ma

FDR:  $2.363 \times 10^{-2}$   
Coefficient:  $-1.35 \times 10^2$   
Value: severe\_ATBtreated

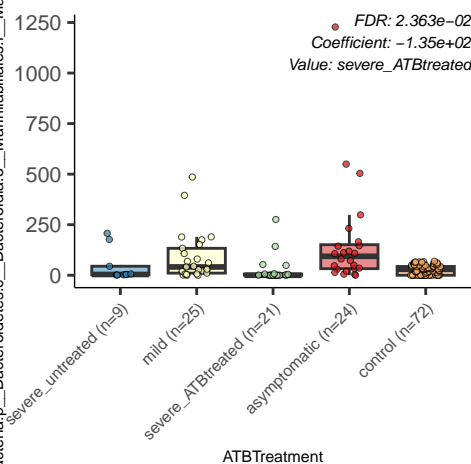

Bacteroidetes.c\_\_Bacteroidia.o\_\_Marinilabiales.f\_\_Marinilabiales

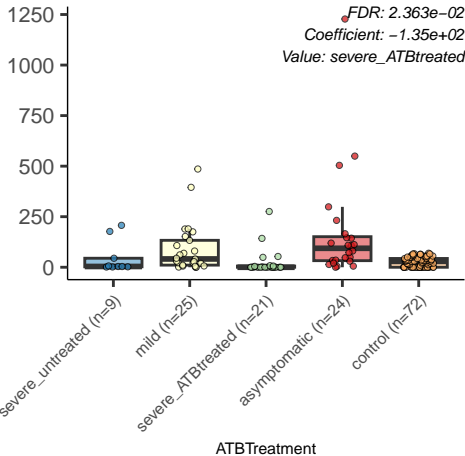

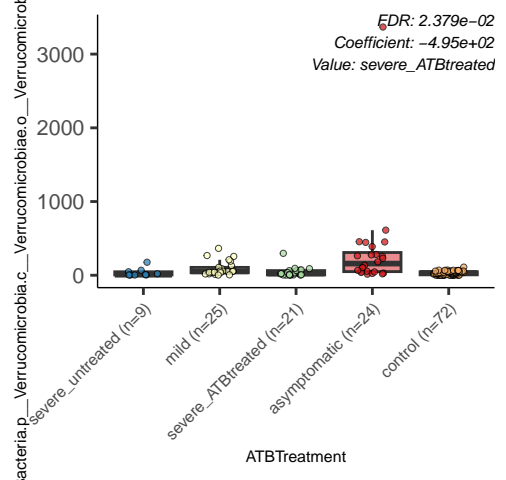

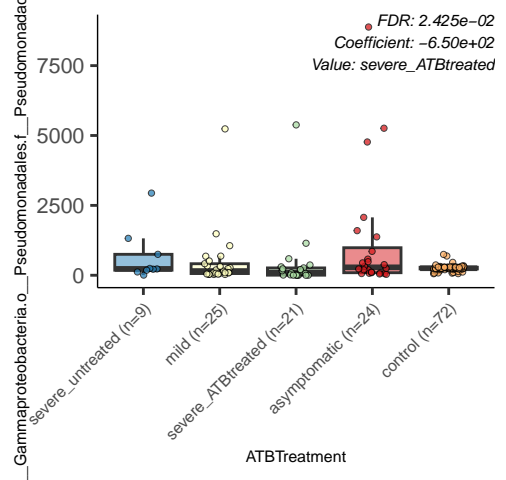

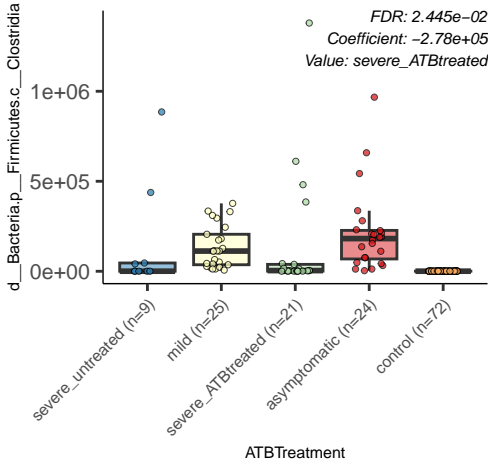

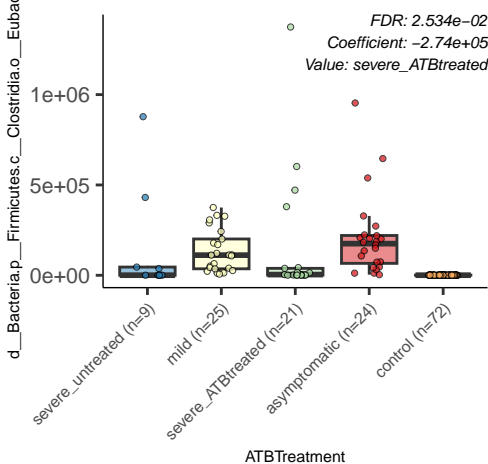



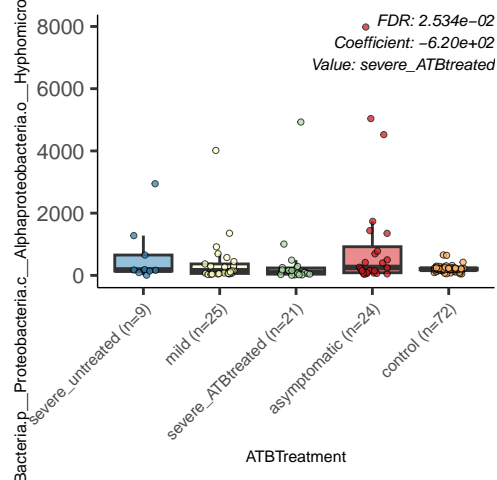

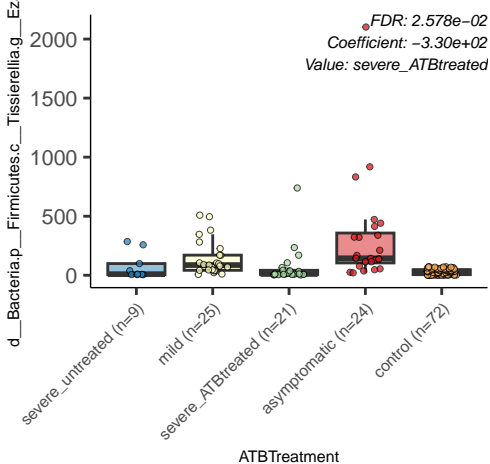

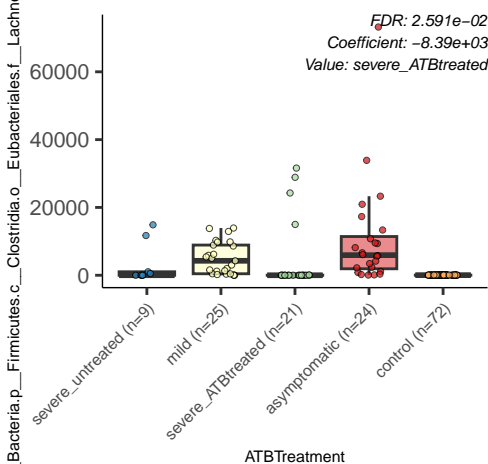

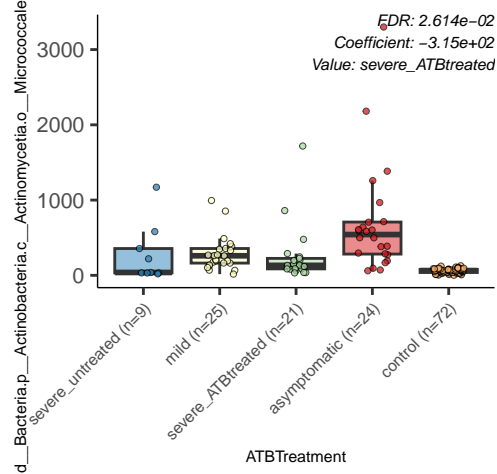

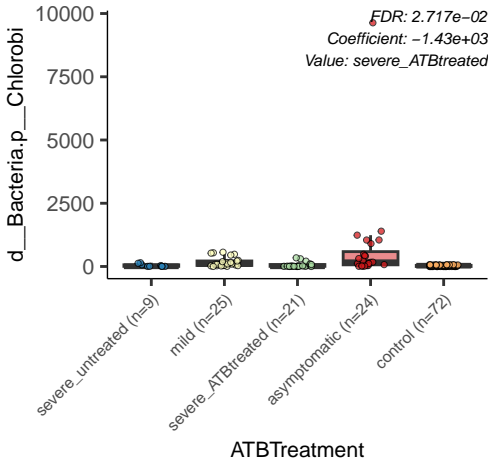

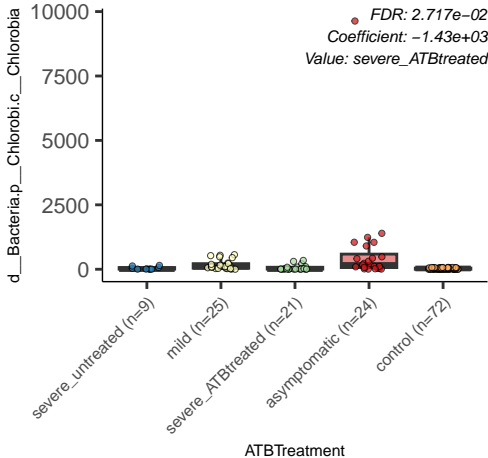

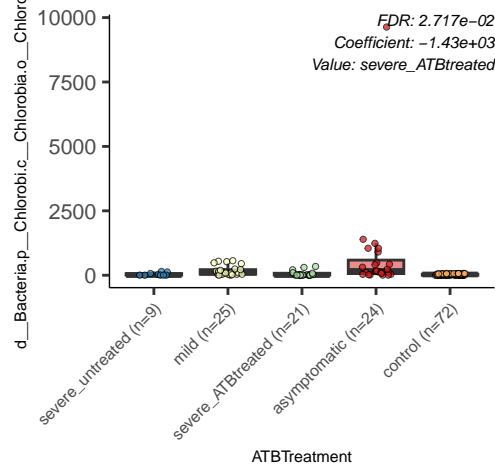

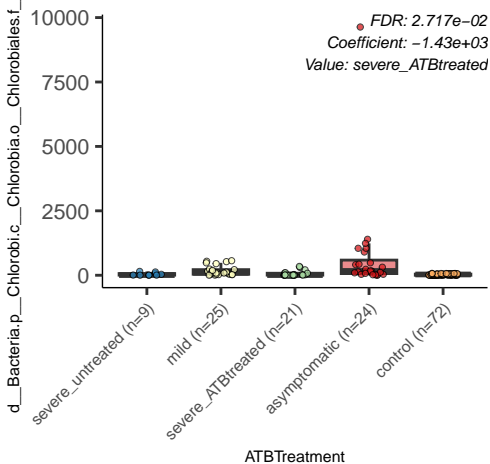



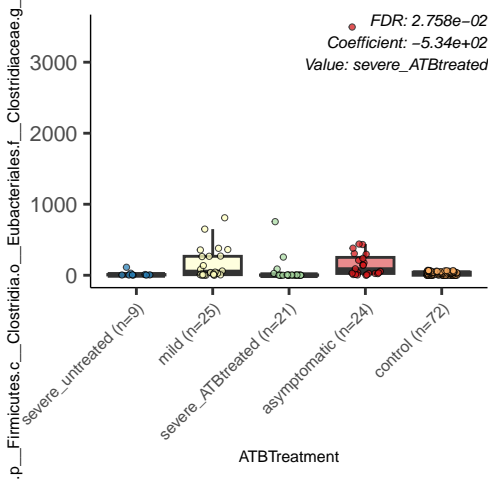

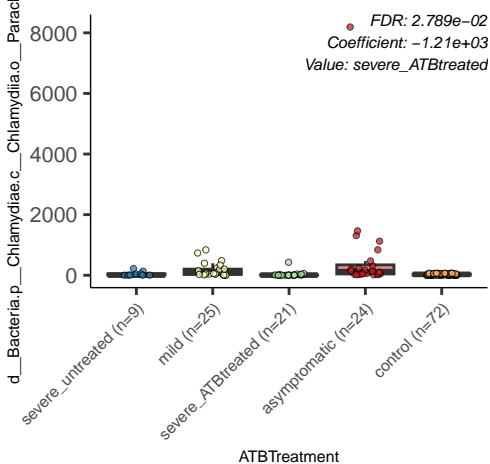

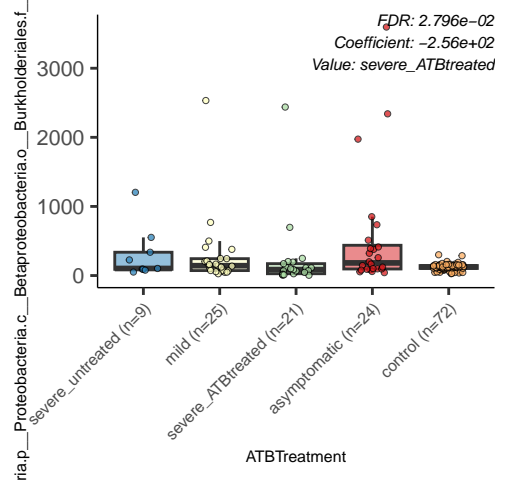

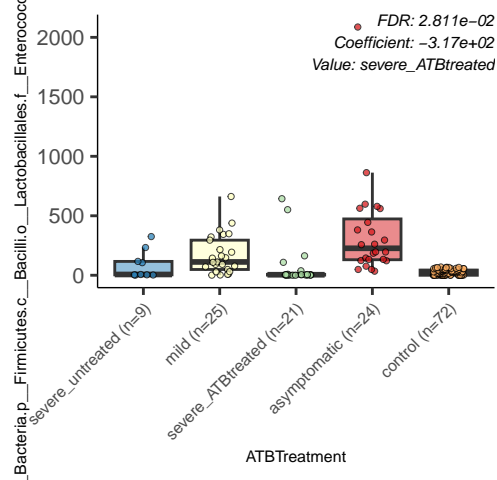

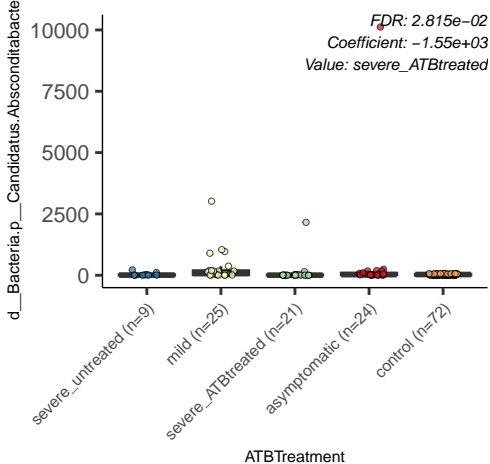

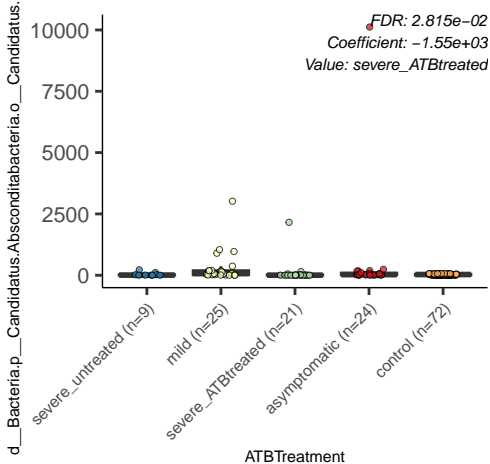

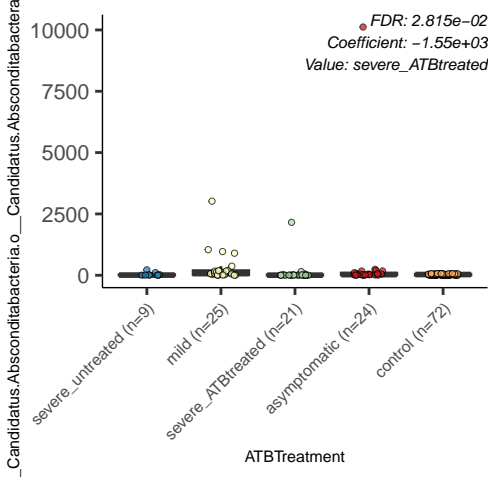

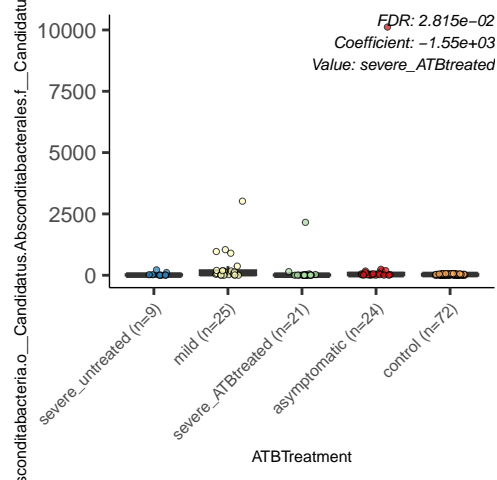



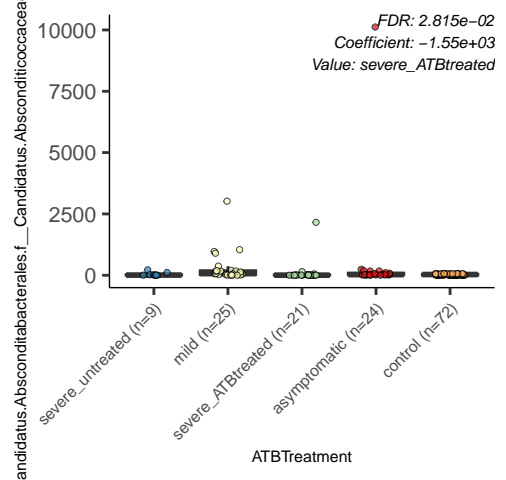

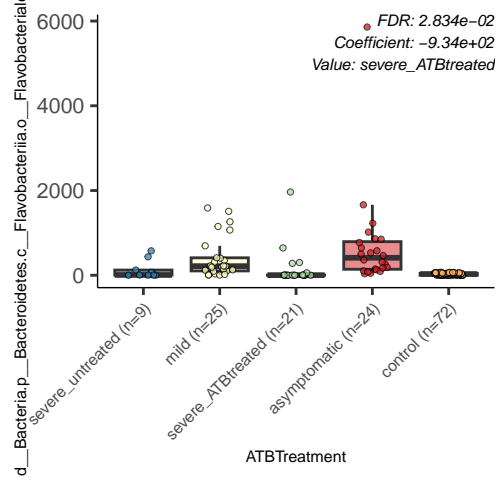

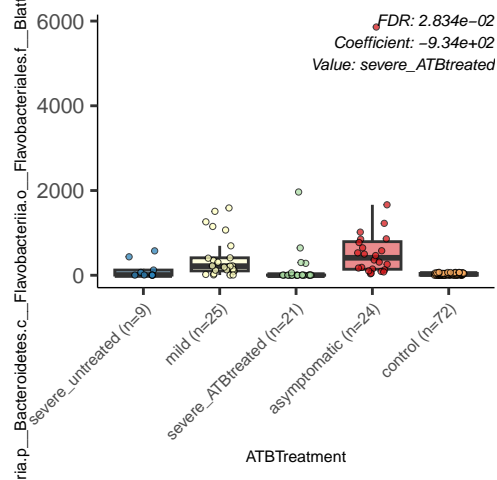

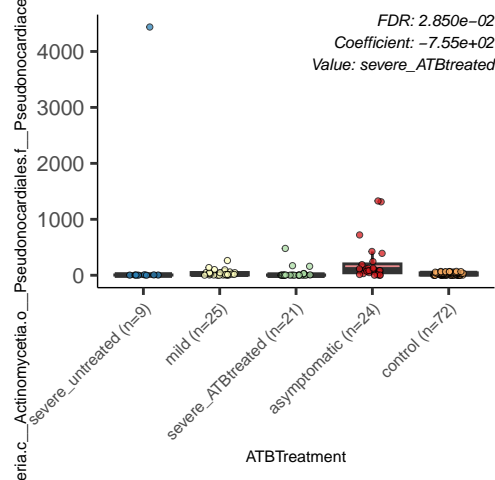

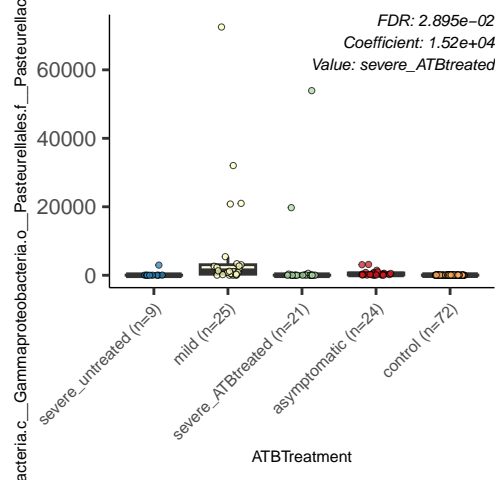

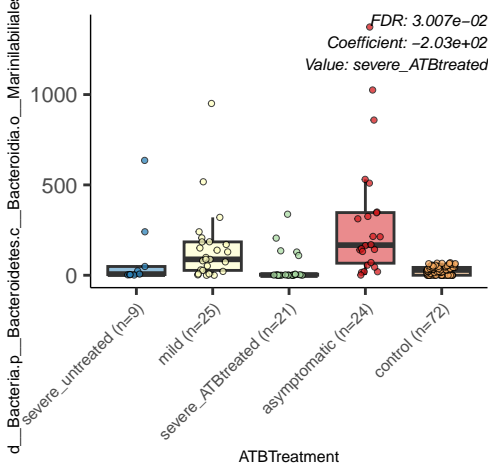

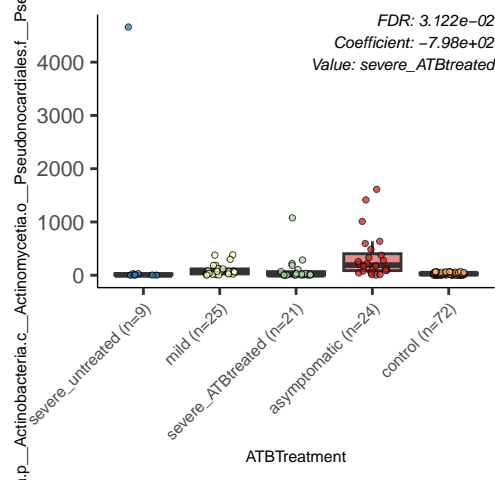

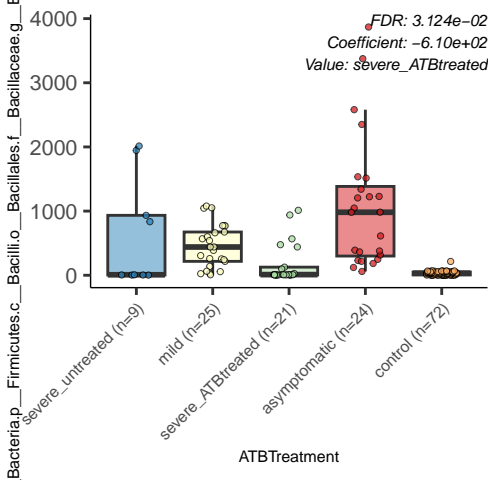



d\_\_Bacteria.p\_\_Bacteroidetes.c\_\_Sphingobact

FDR:  $3.181 \times 10^{-2}$   
Coefficient:  $-2.42 \times 10^3$   
Value: severe\_ATBtreated

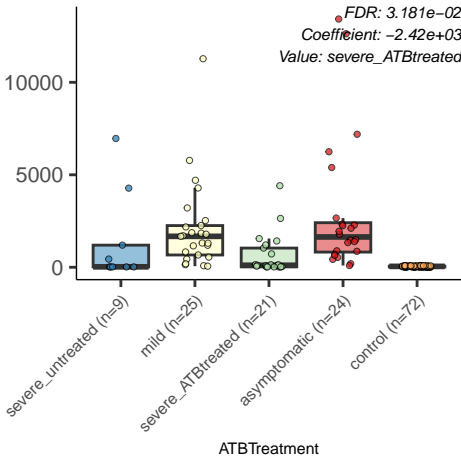

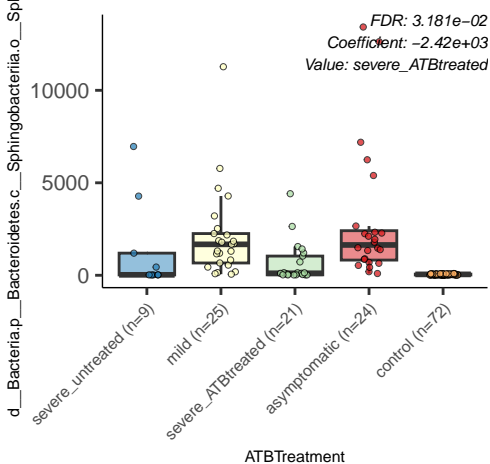

Bacteria.p\_Bacteroidetes.c\_Sphingobacteriia.o\_Sphingobacteriia

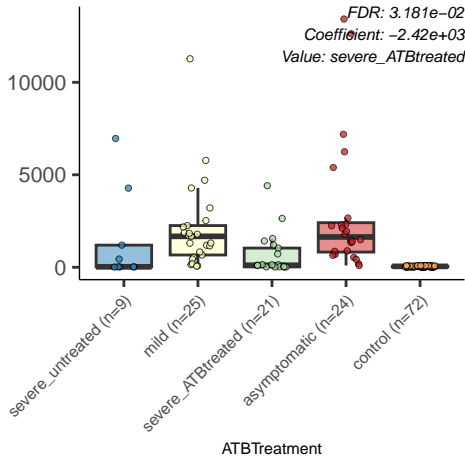

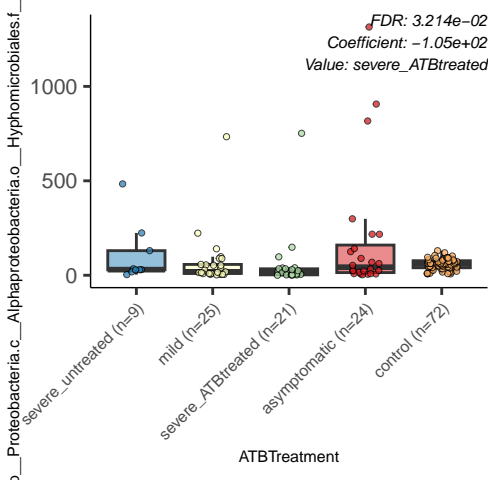

ria.c\_\_Alphaproteobacteria.o\_\_Hyphomicrobiales.f\_\_Xanthobacteria

FDR:  $3.214 \times 10^{-2}$   
Coefficient:  $-1.05 \times 10^2$   
Value: severe\_ATBtreated

1000  
500  
0

severe\_unreated (n=9)

mild (n=25)

severe\_ATBtreated (n=21)

asymptomatic (n=24)

control (n=72)

ATBTreatment

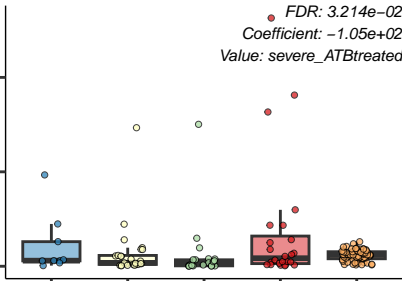

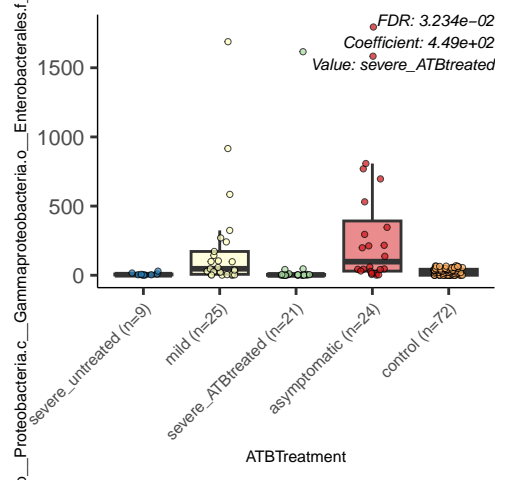

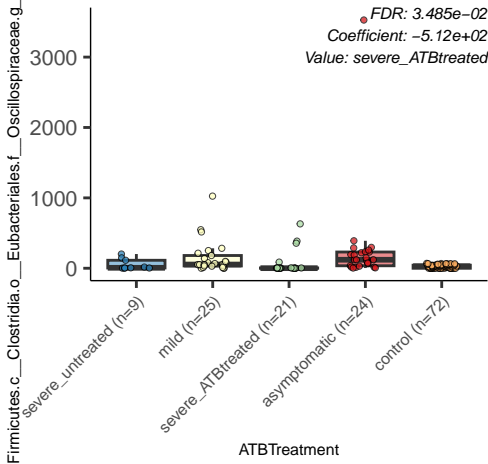

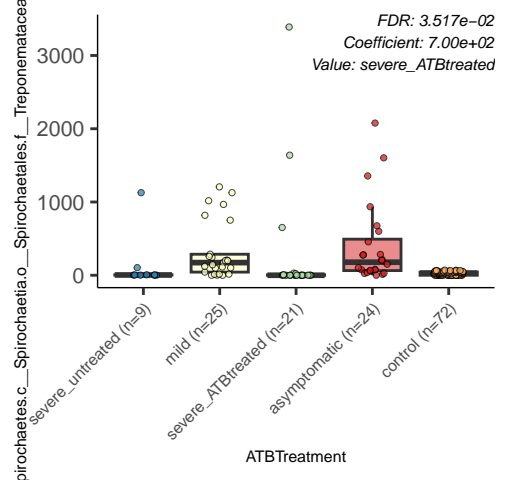



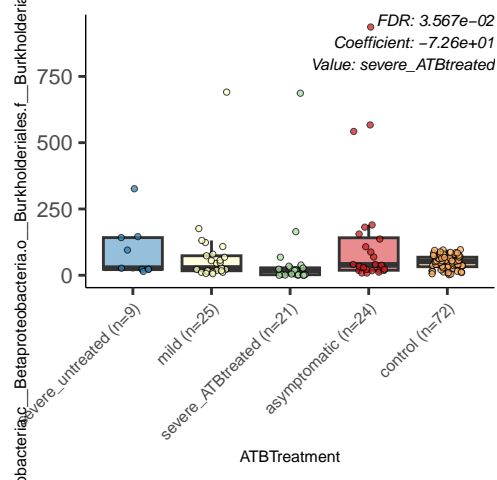

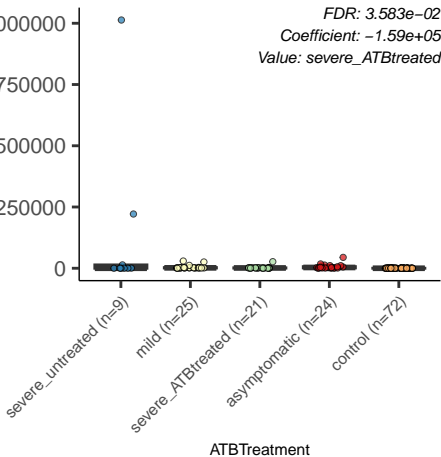

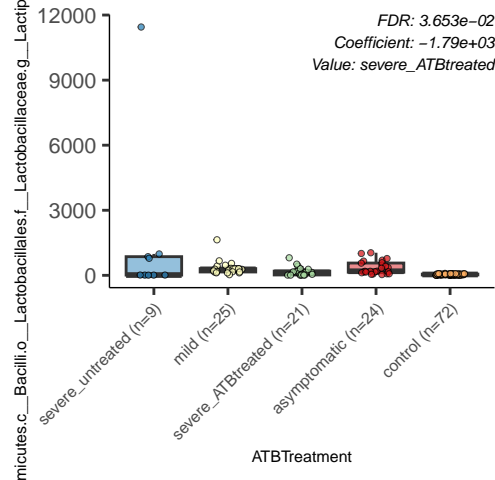

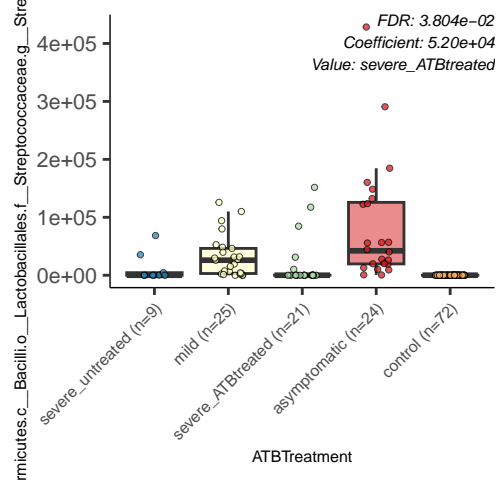

Bacteroidetes.c\_Bacteroidia.o\_Bacteroidales.f\_Bacteroidaceae.

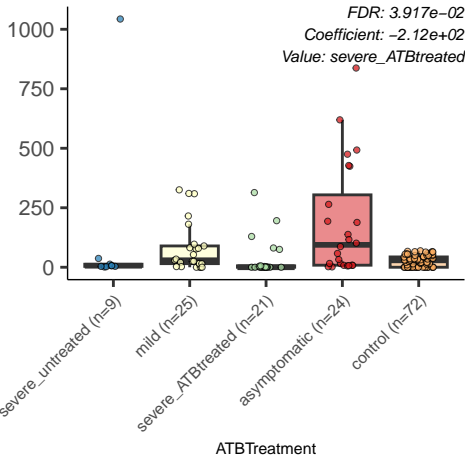

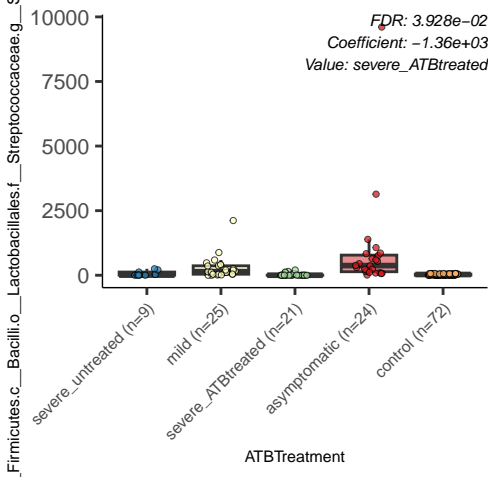

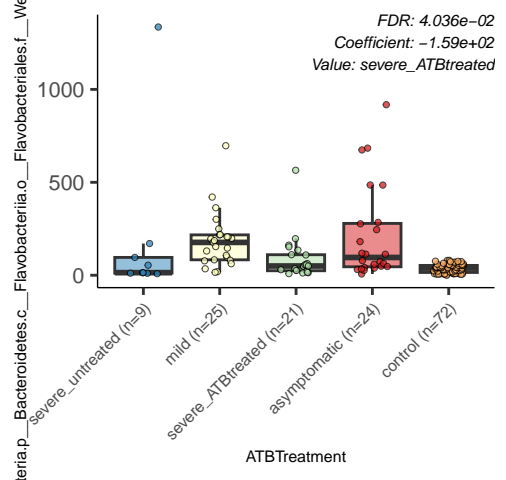

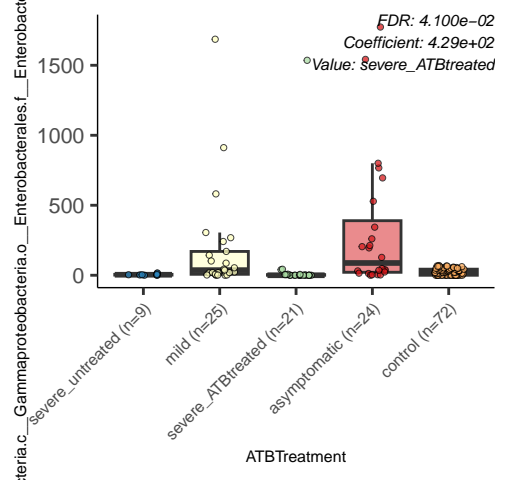



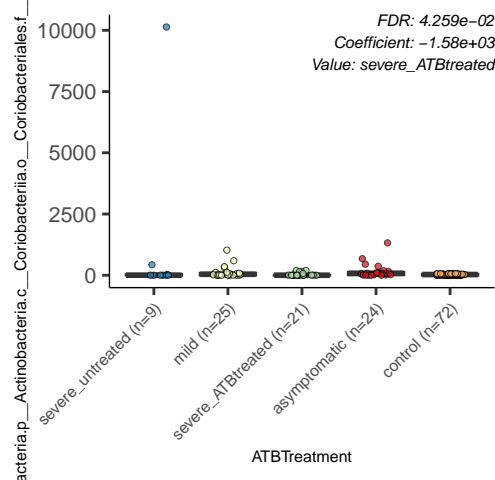

a.p\_\_Candidatus.Saccharibacteria.c\_\_Candidatus.Saccharimonadia

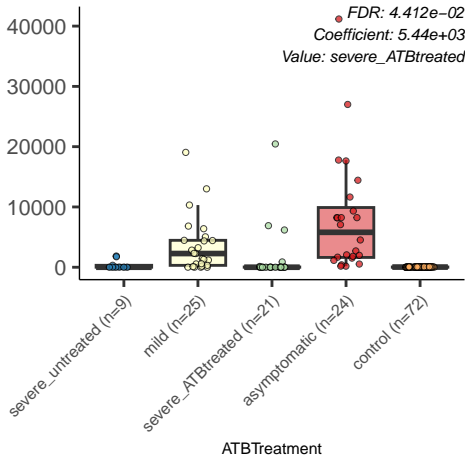

Saccharibacteria.c\_\_Candidatus.Saccharimonadia.o\_\_Candidatus.Sa

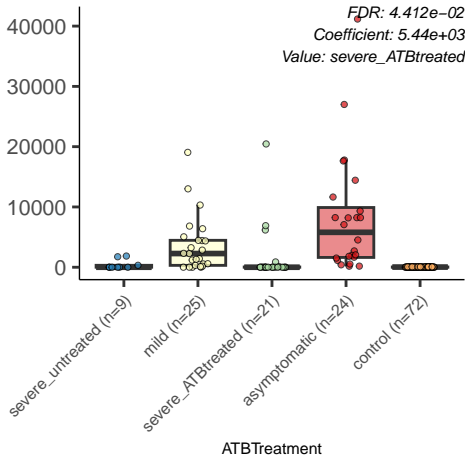

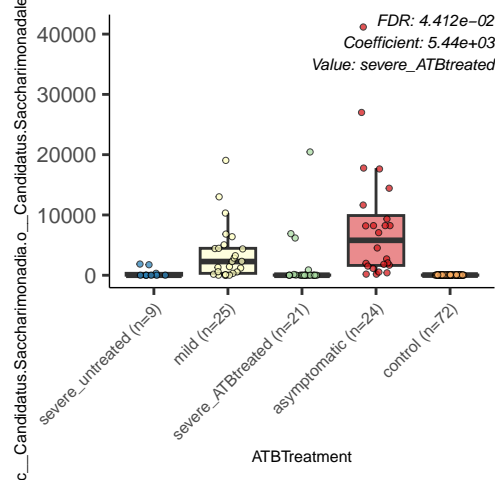

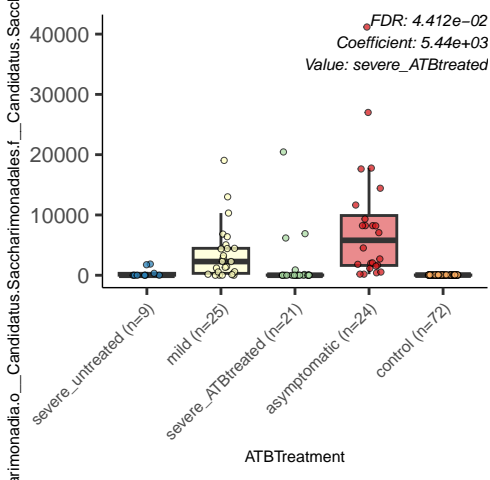



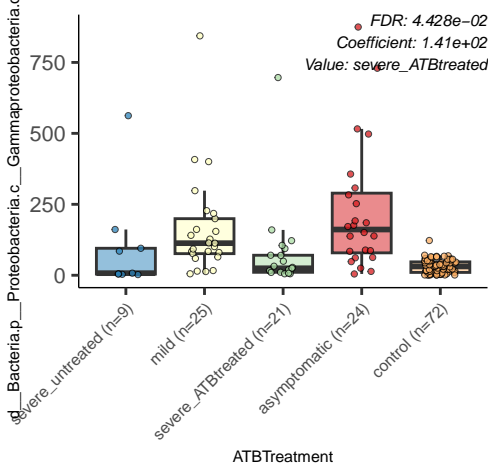

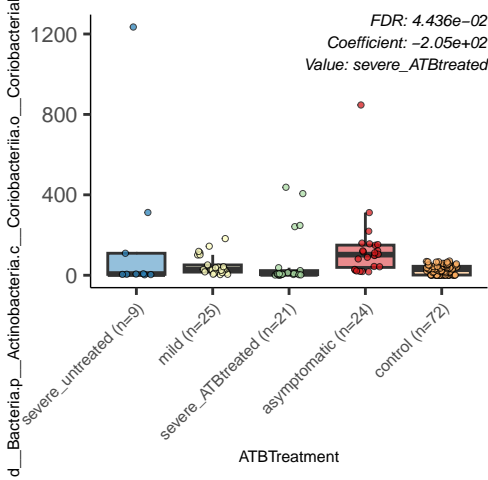



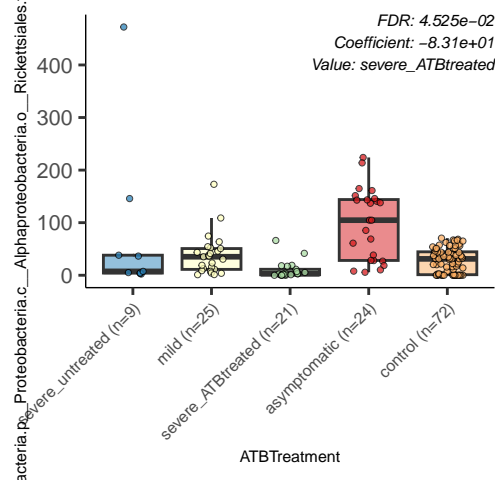

Firmicutes.c\_\_Clostridia.o\_\_Eubacteriales.f\_\_Lachnospiraceae.g

*FDR*: 4.549e-02

Coefficient:  $-2.70e+03$

Value: severe\_ATBtreated

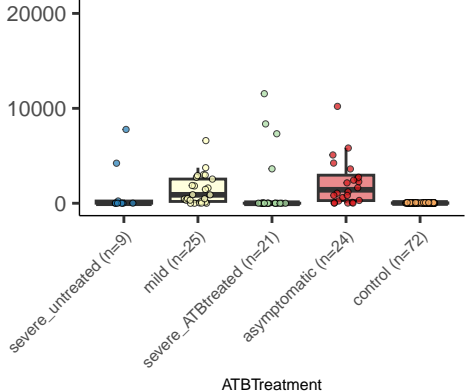

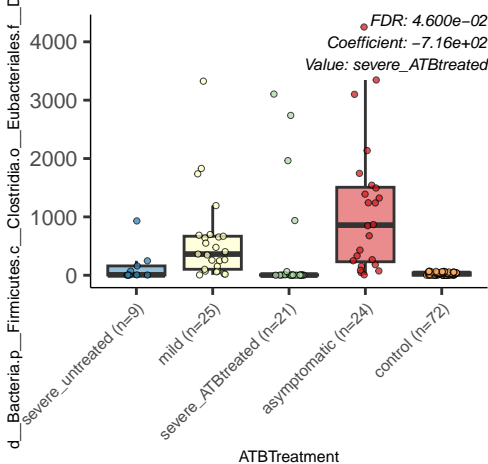

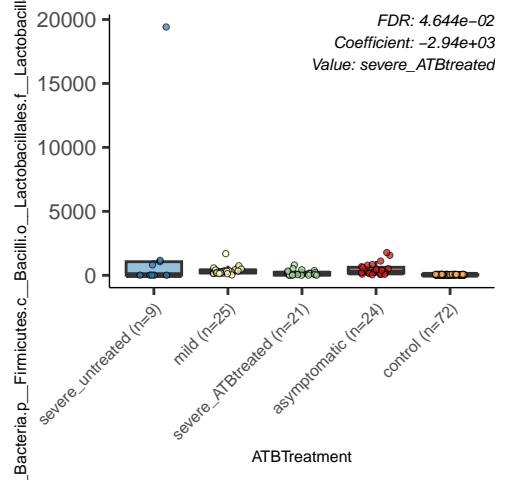

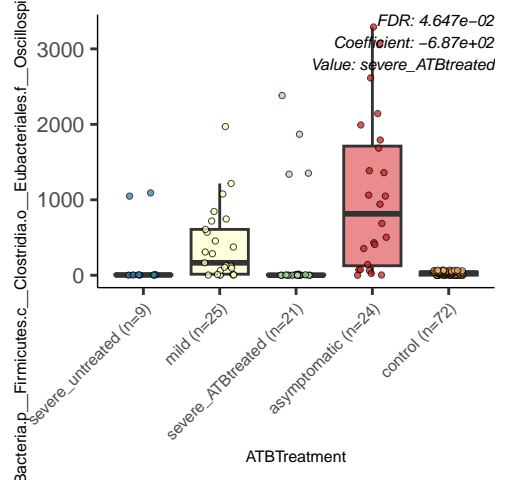

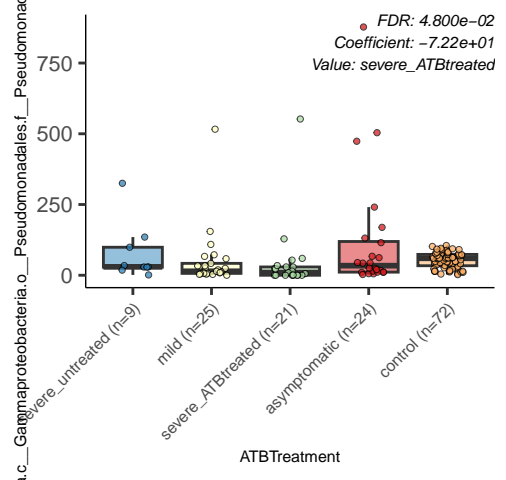

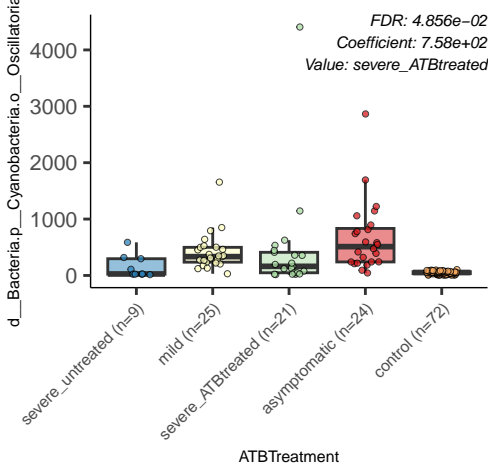

FDR:  $4.918e-02$   
Coefficient:  $-3.43e+04$   
Value: severe\_ATBtreated

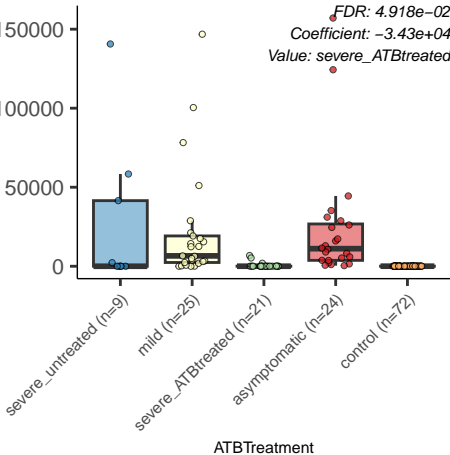



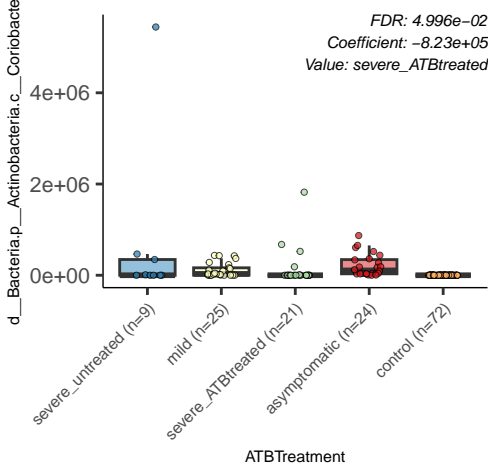

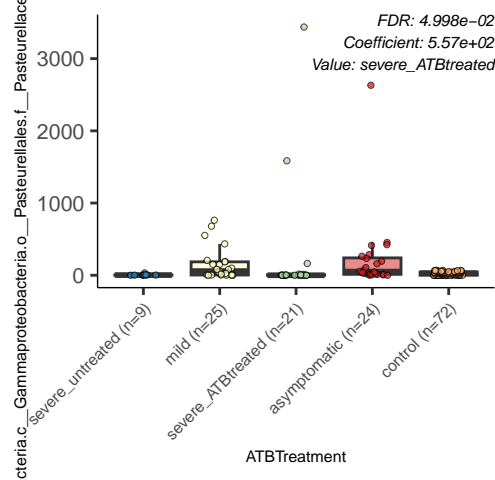

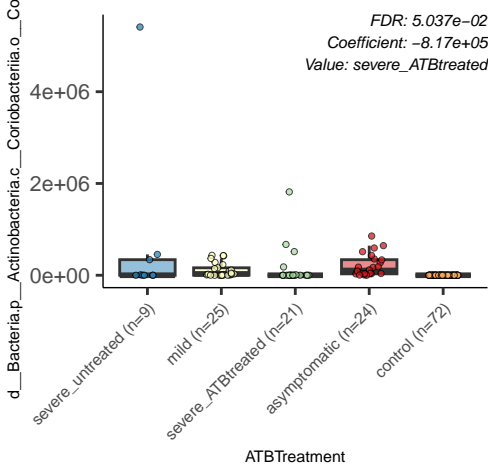

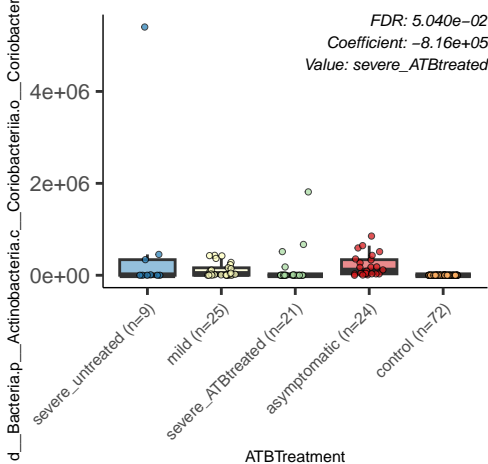

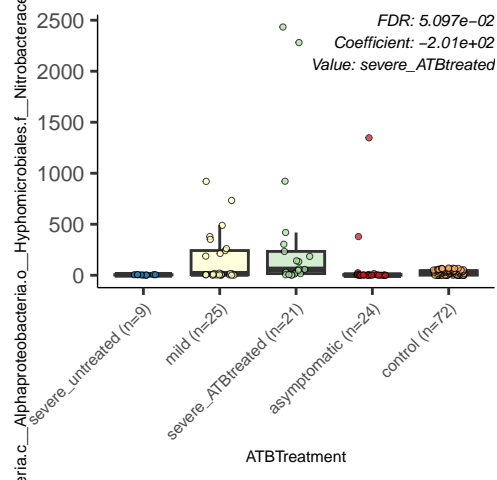

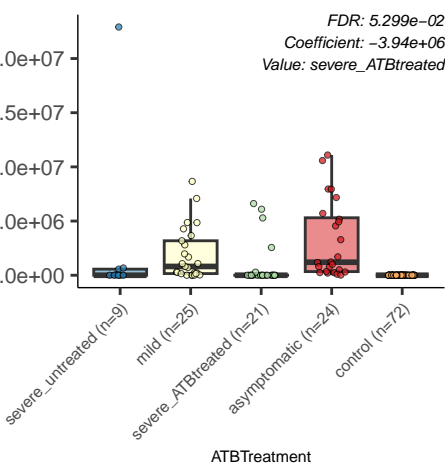

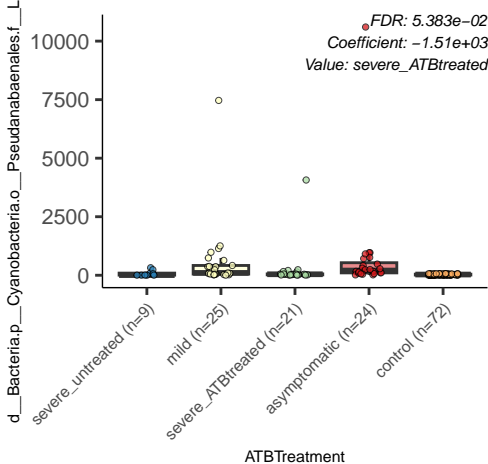

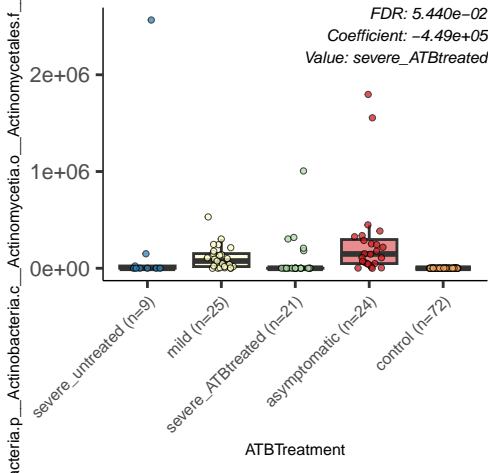



l\_Bacteria.p\_\_Cyanobacteria.o\_\_Pseudanabaenales.f\_\_Leptolyng

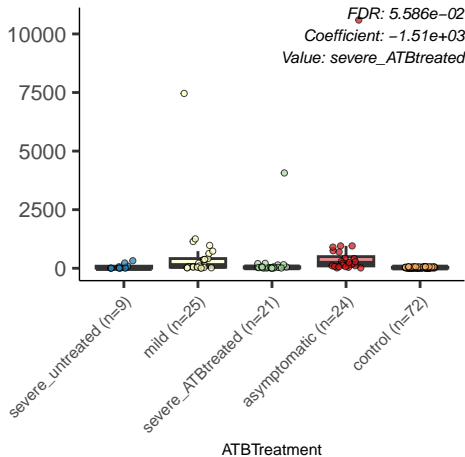

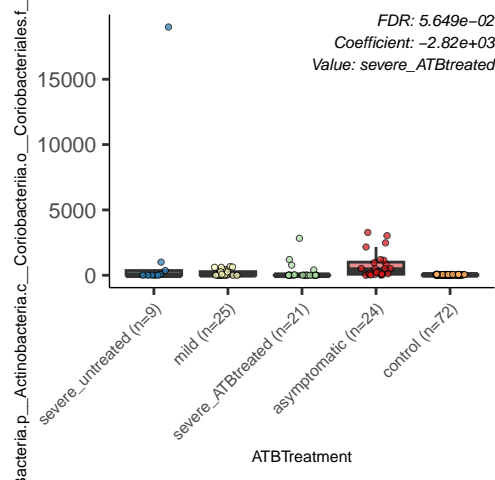

obacteria.c\_\_Coriobacteriia.o\_\_Coriobacteriales.f\_\_Atopobiaceae.g

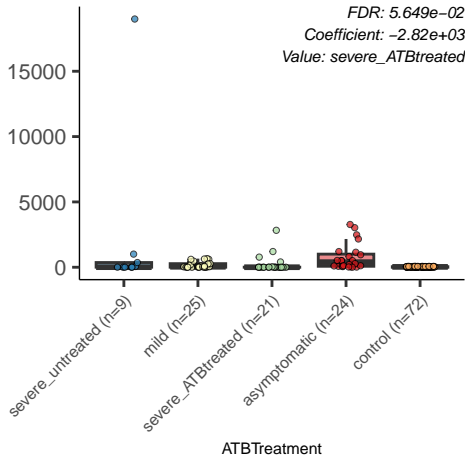

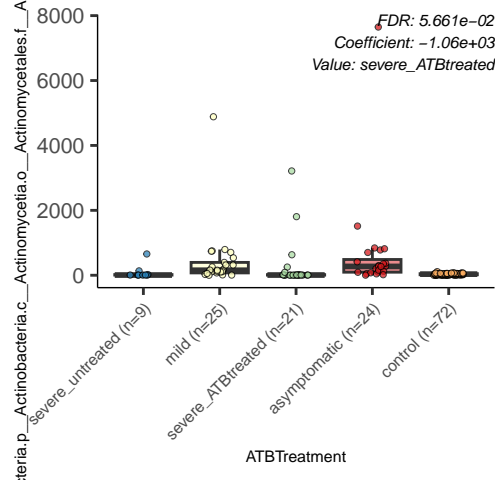

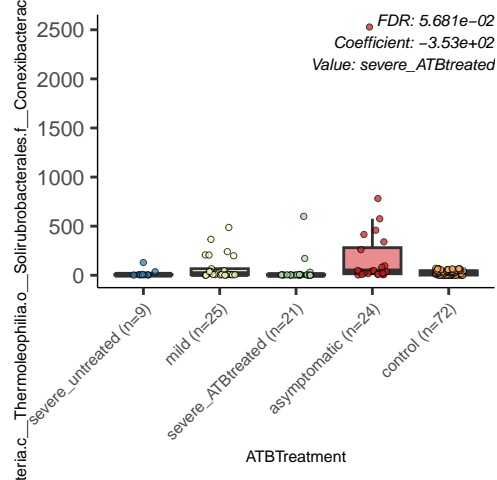

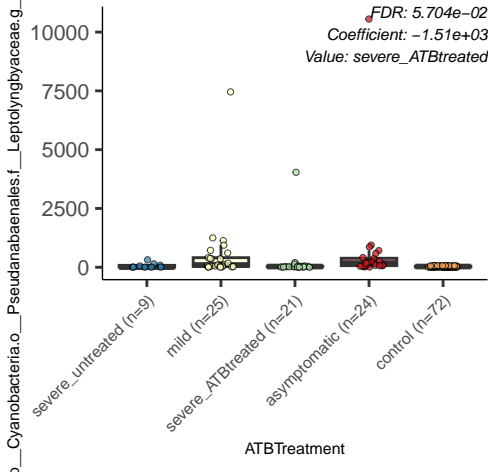

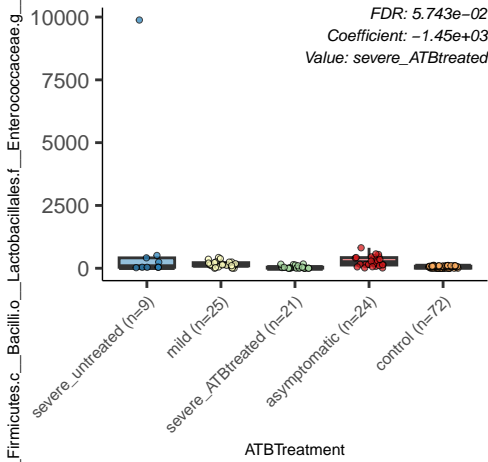

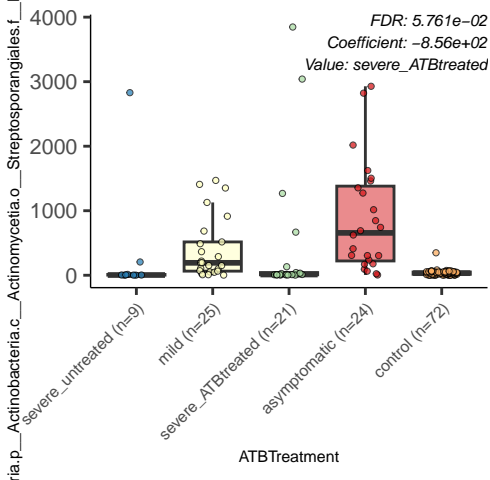



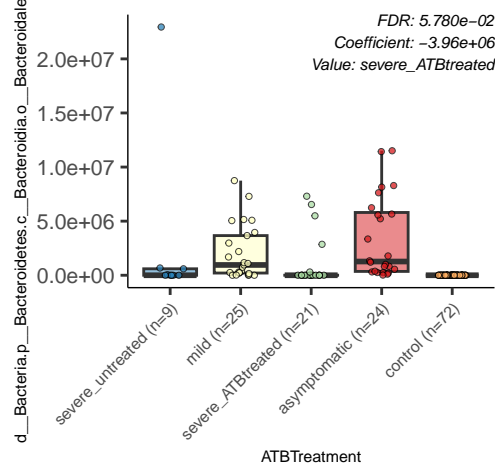

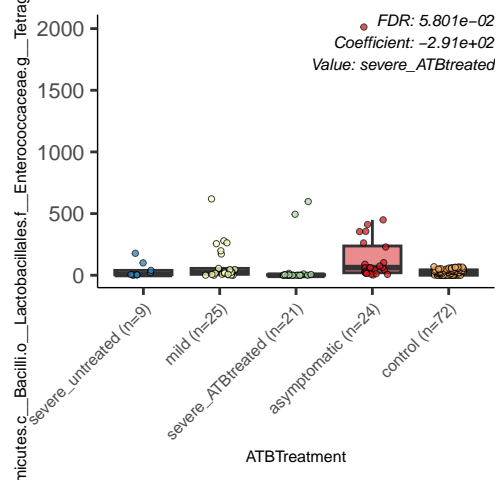

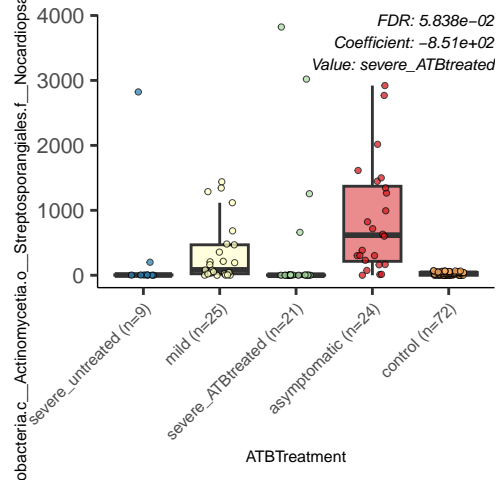

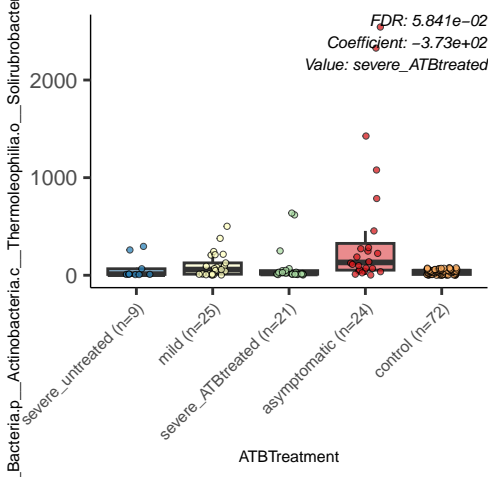

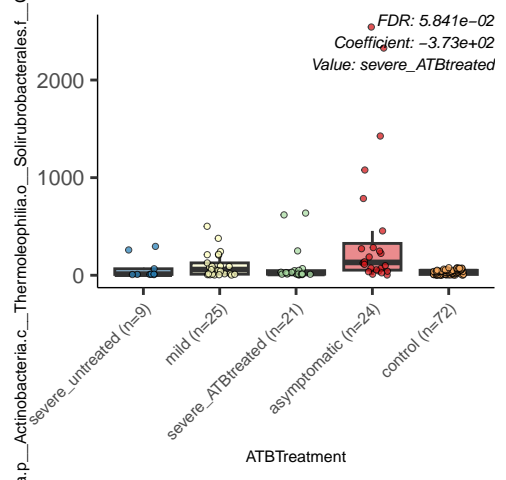

bacteria.c\_\_Actinomycetia.o\_\_Actinomycetales.f\_\_Actinomycetaceae

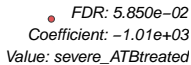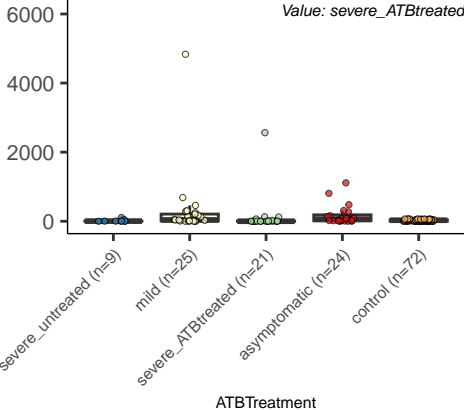

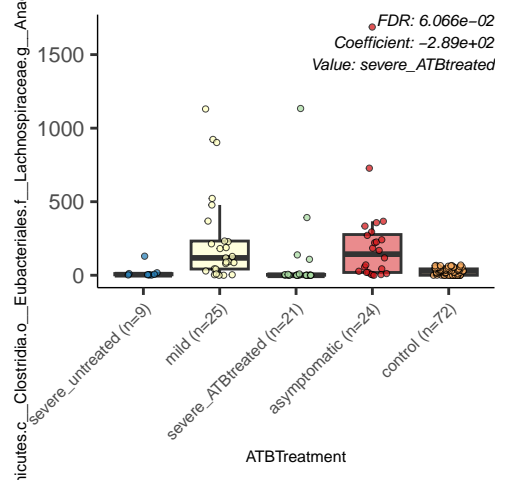

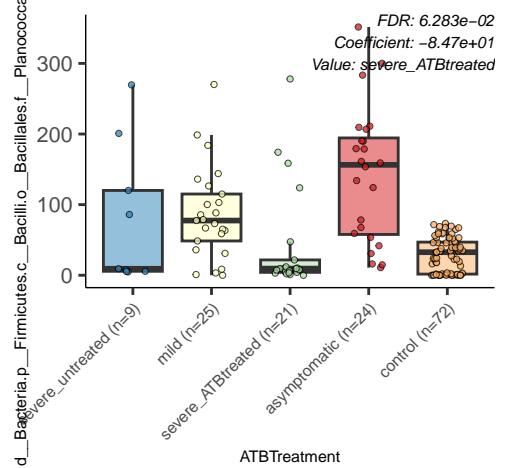



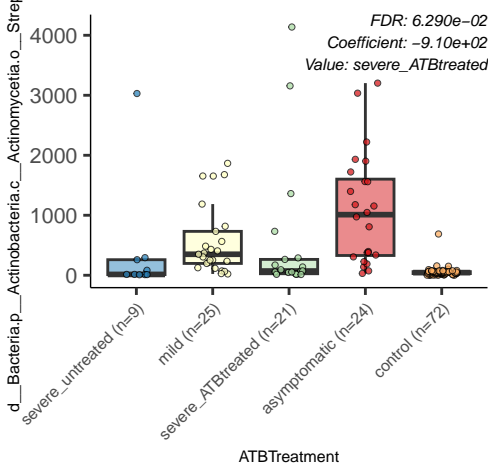

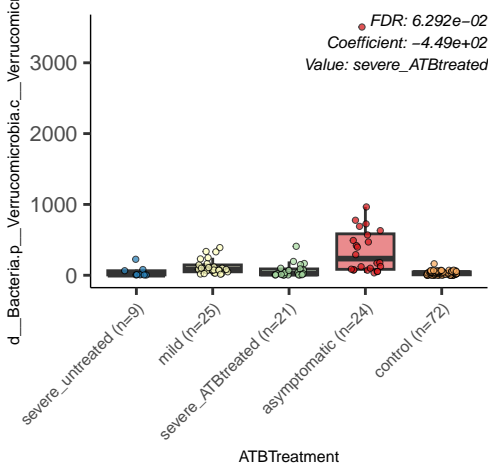

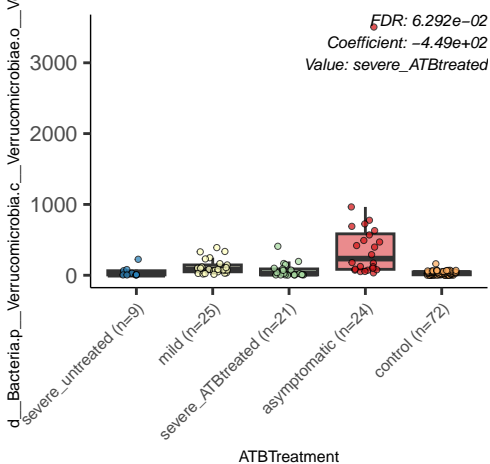

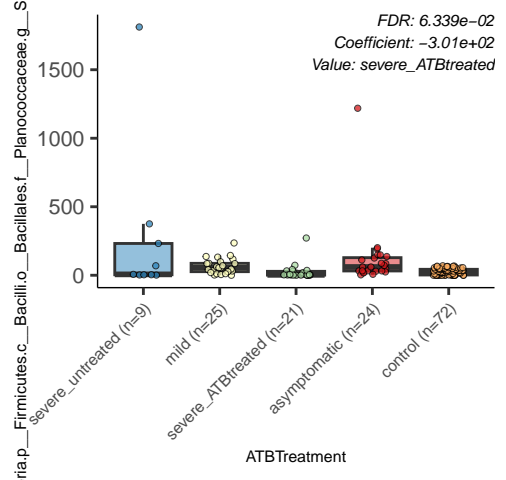

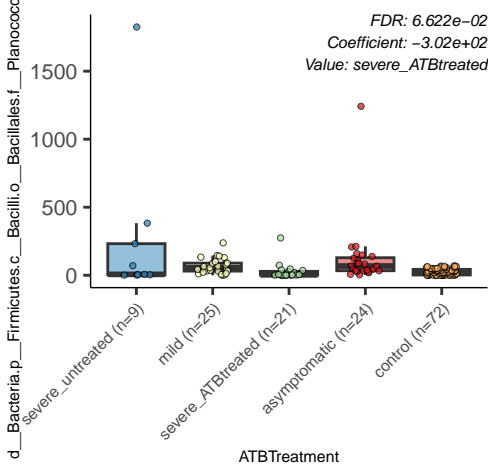

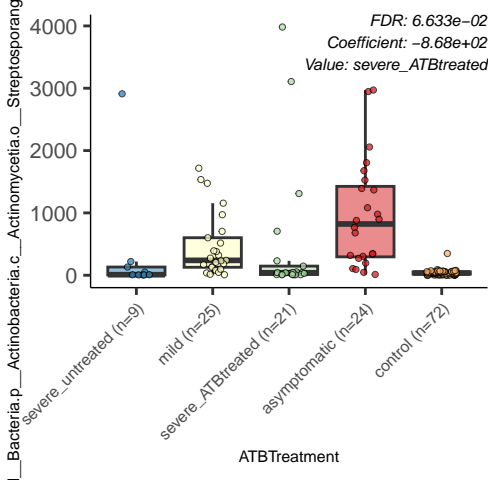

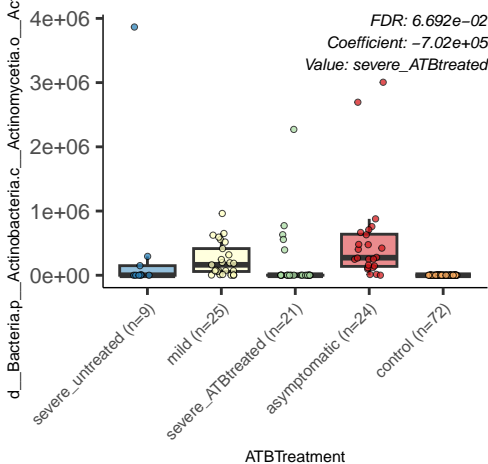

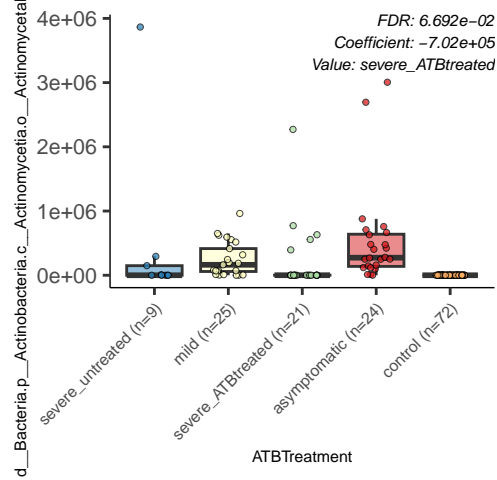



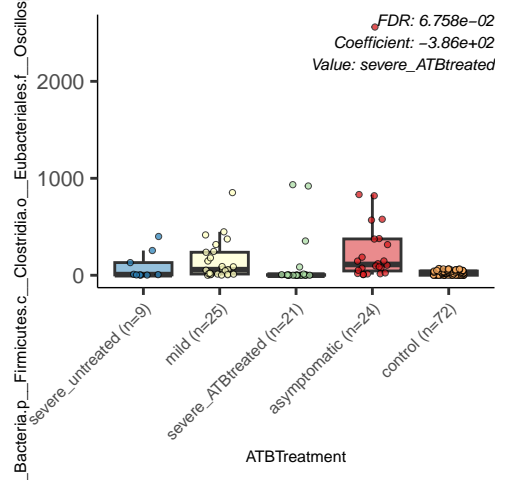

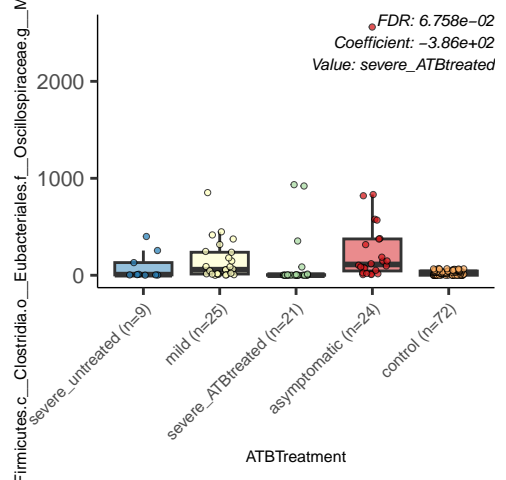

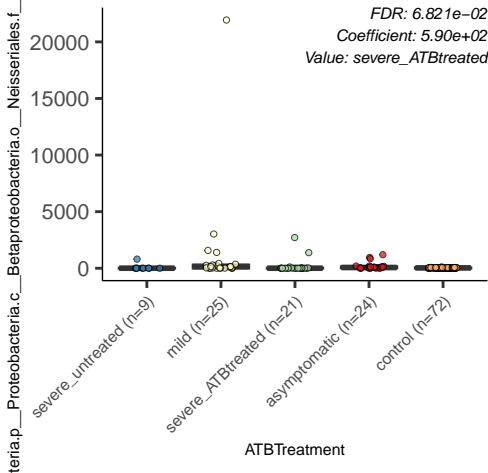



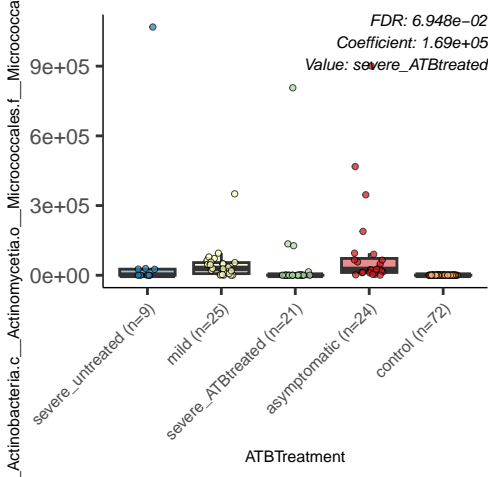

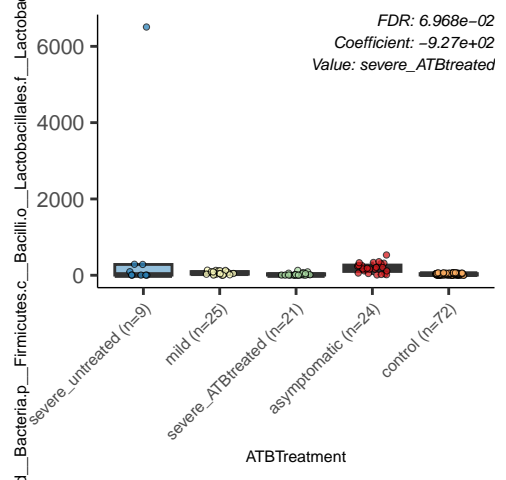

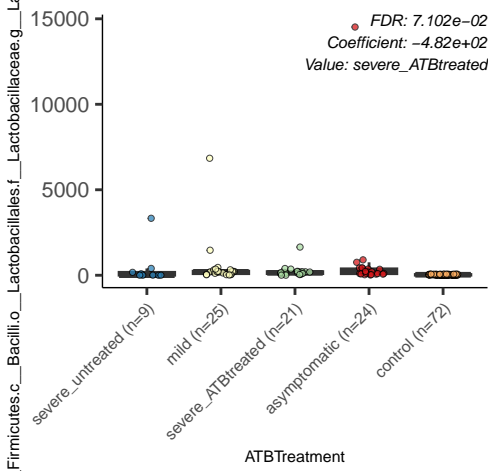

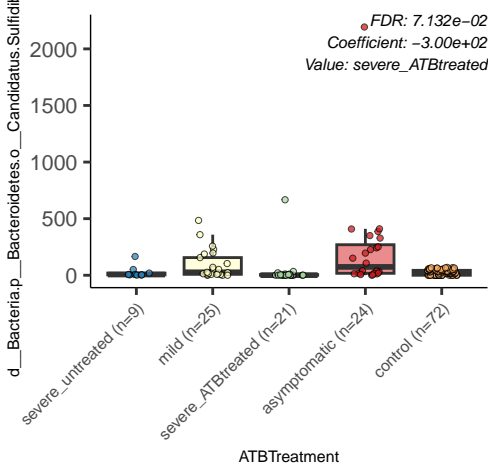



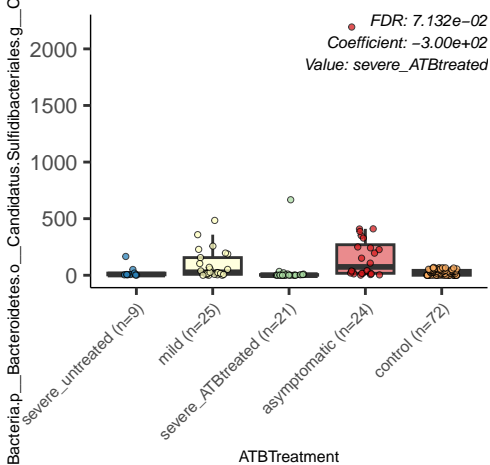

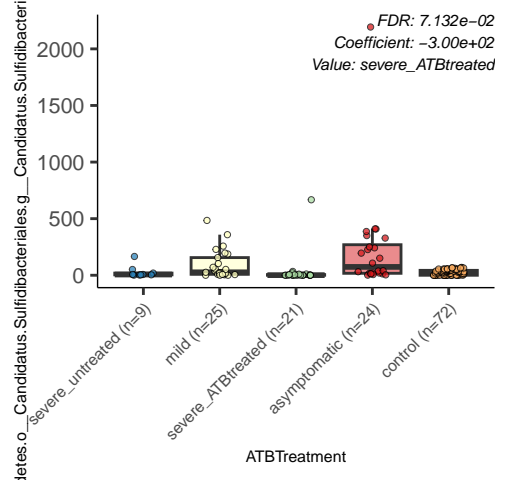

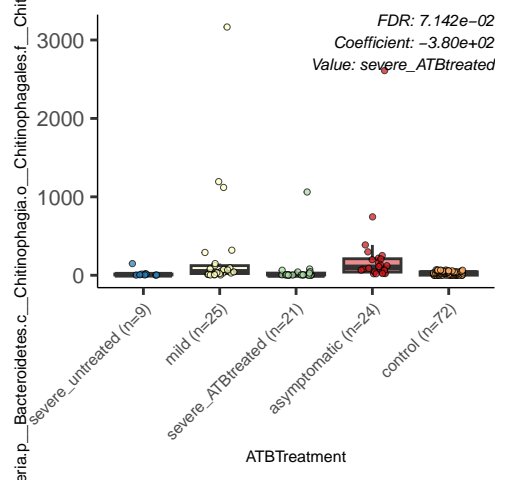

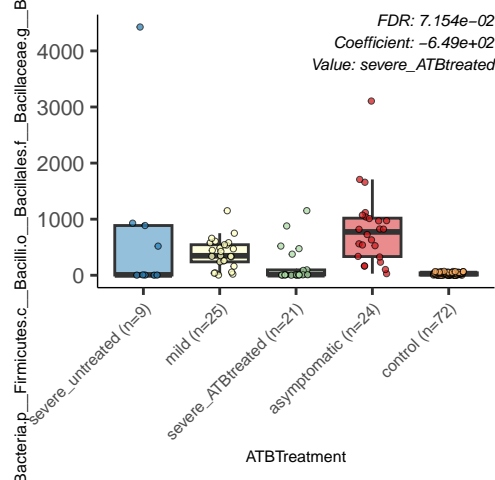

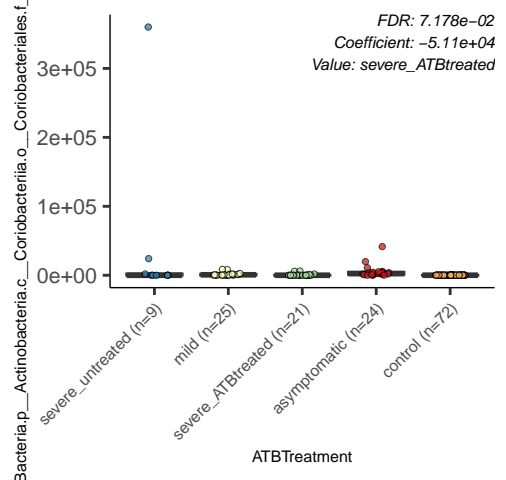

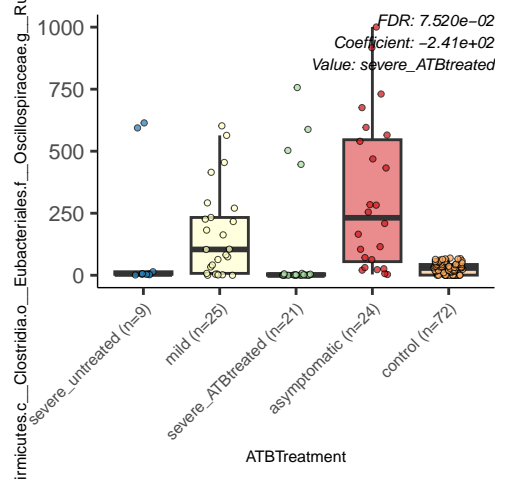

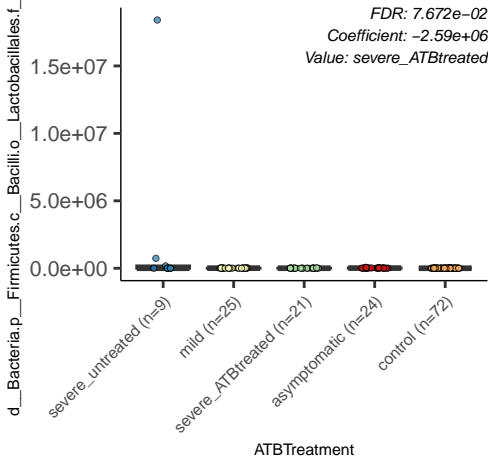

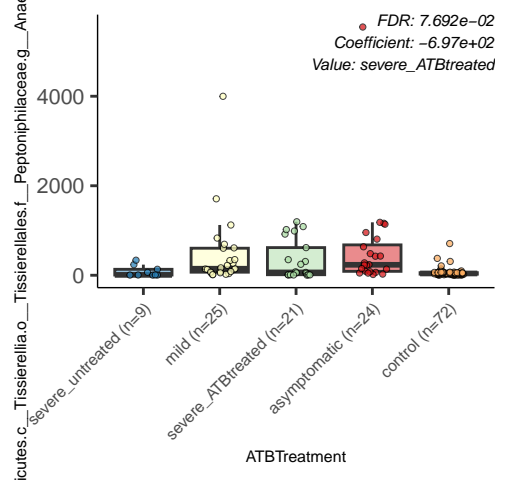



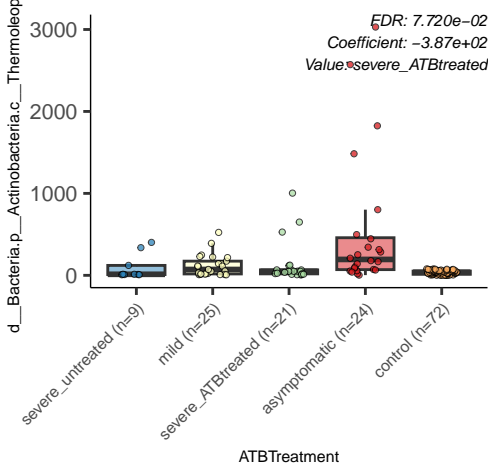

FDR:  $7.779 \times 10^{-2}$   
Coefficient:  $-2.66 \times 10^5$   
Value: severe\_ATBtreated

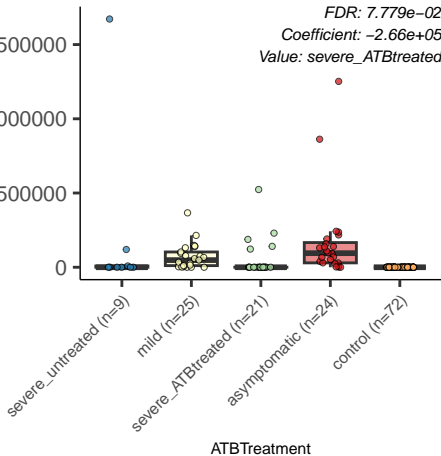

d\_\_Bacteria.p\_\_Cyanobacteria.o\_\_Pseudanabaena

FDR:  $7.996e-02$   
Coefficient:  $-1.70e+03$   
Value: severe\_ATBtreated

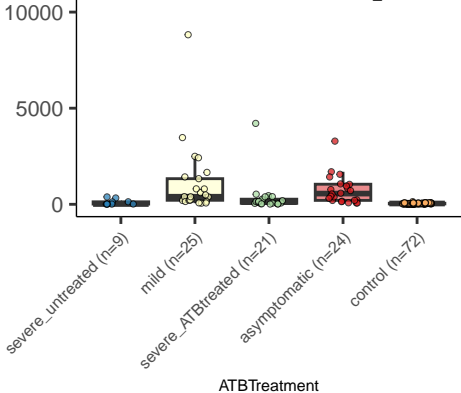

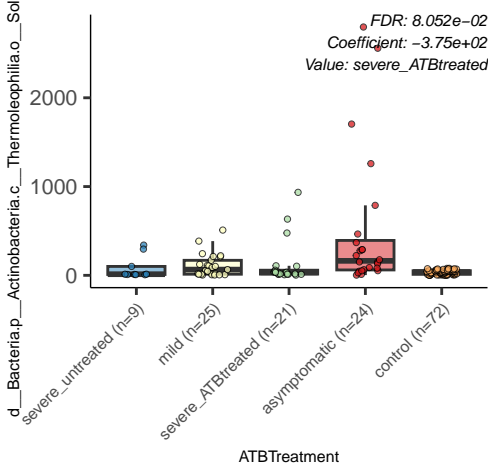

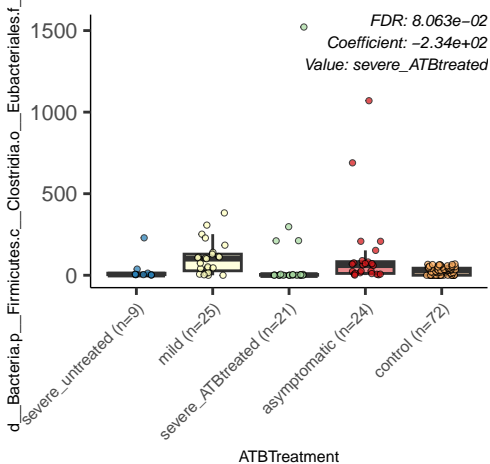

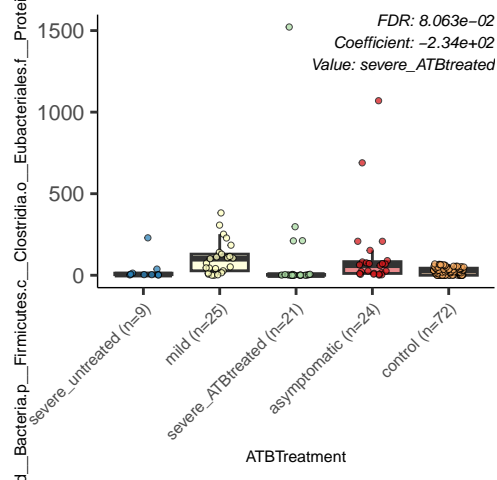

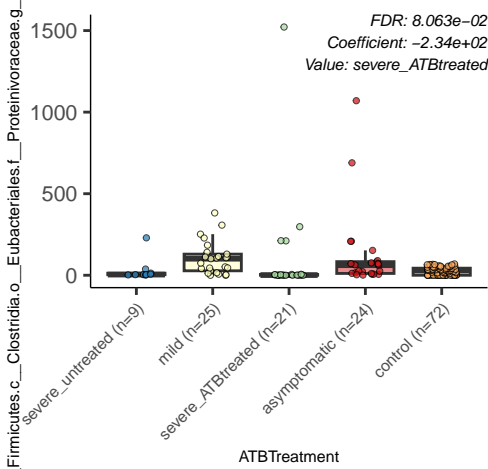

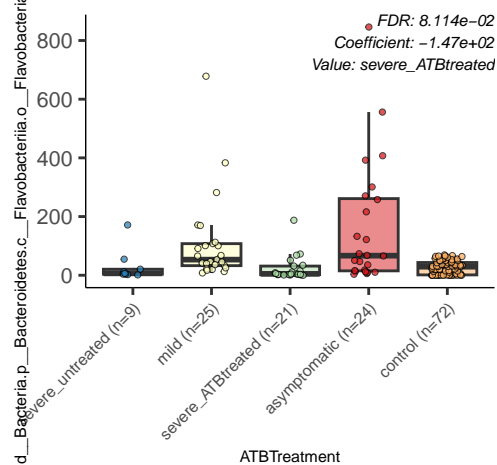



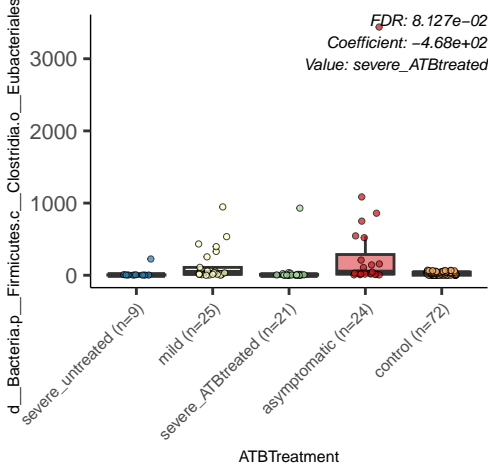

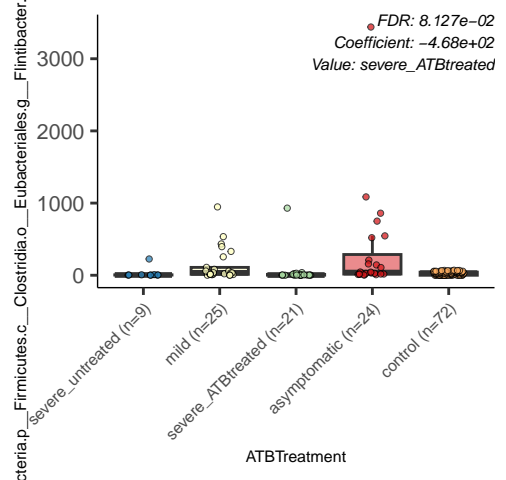

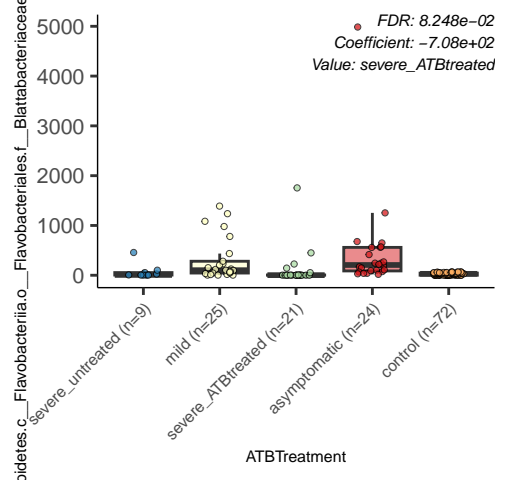

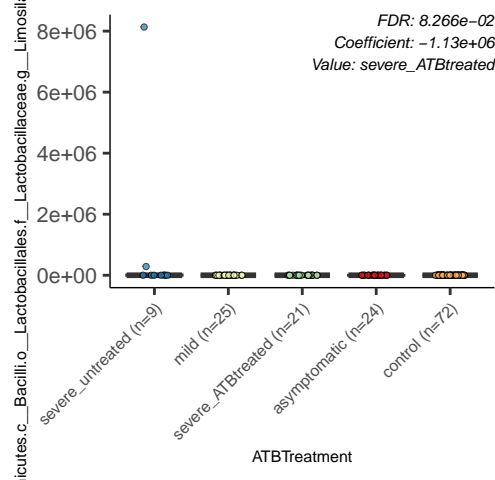

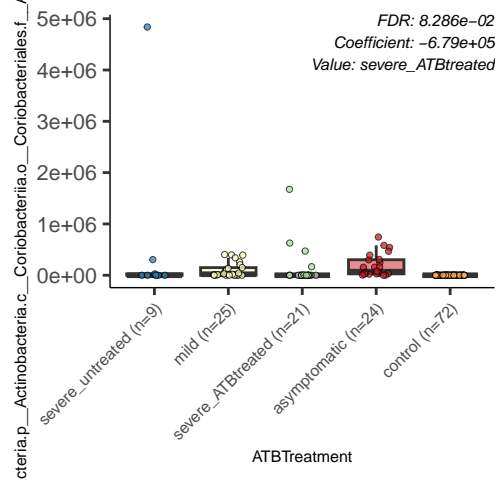

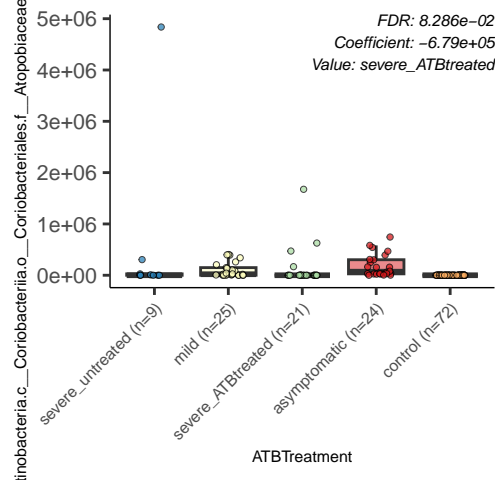

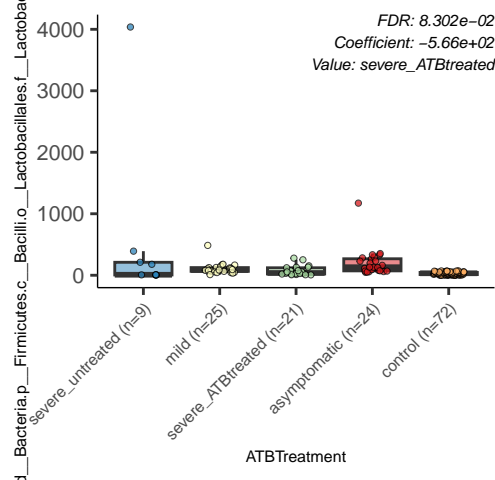

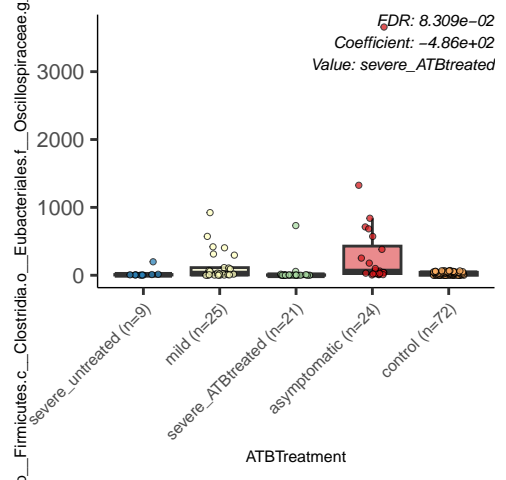



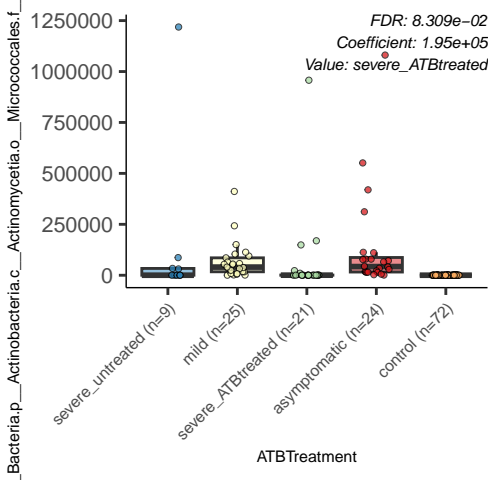

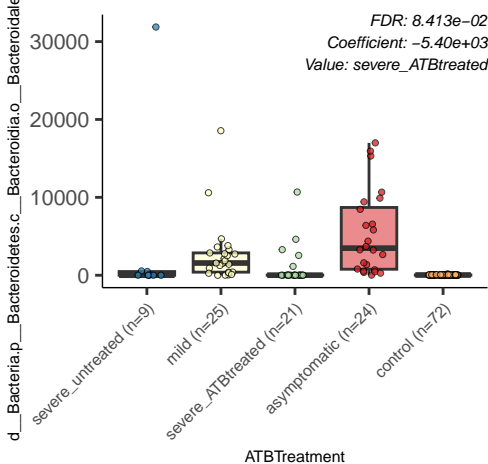

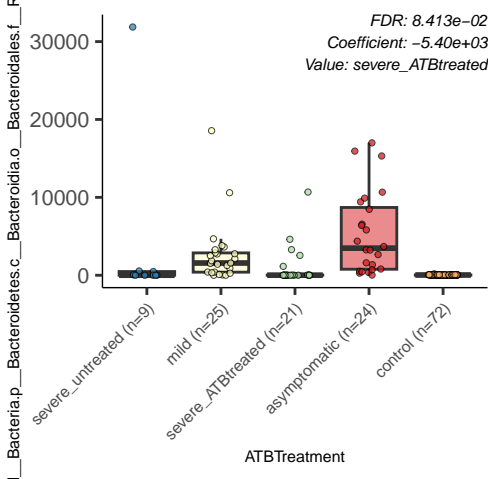

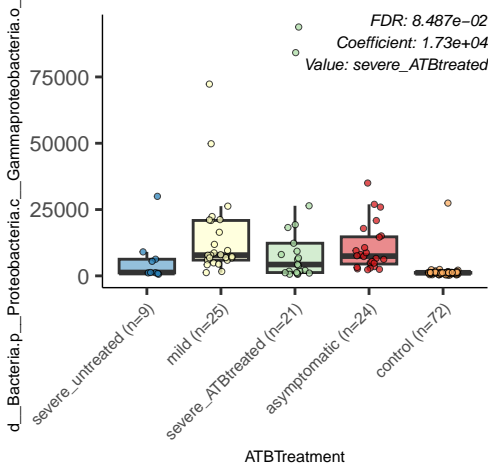

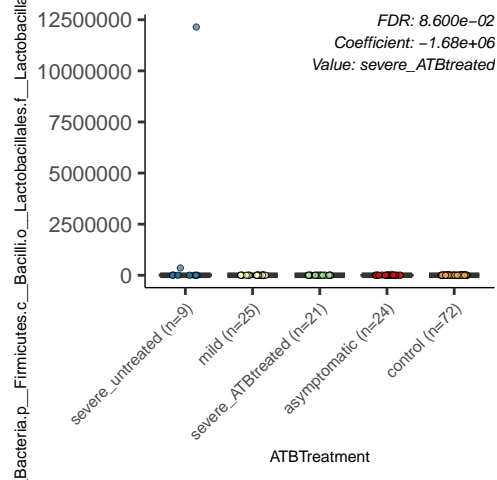

Bacteroidetes.c\_Bacteroidia.o\_Bacteroidales.f\_Bacteroidaceae.g

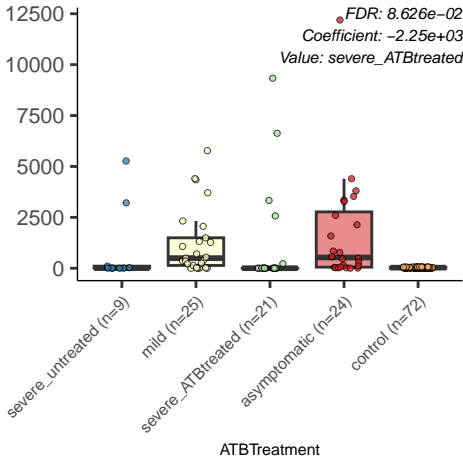

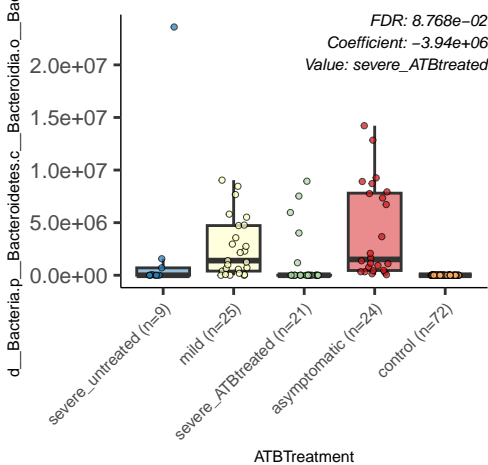

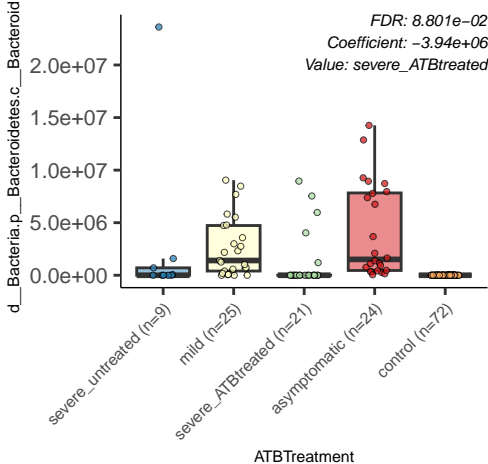



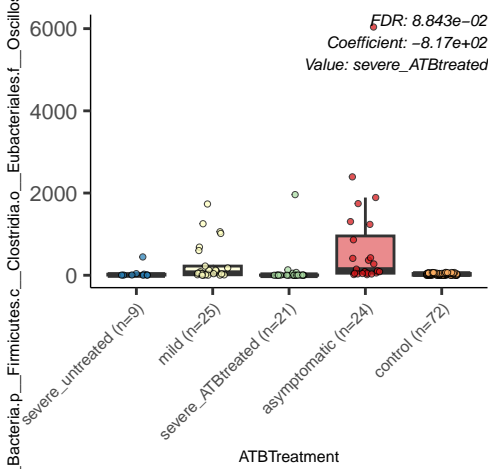

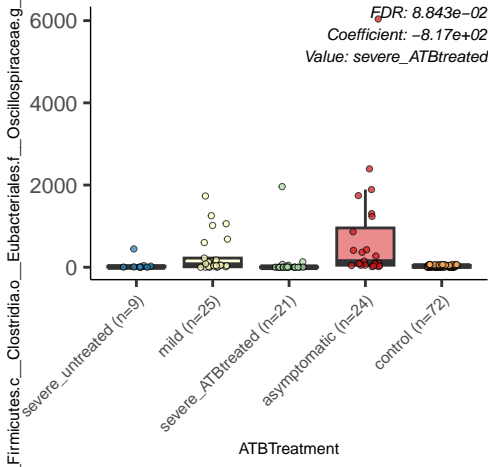

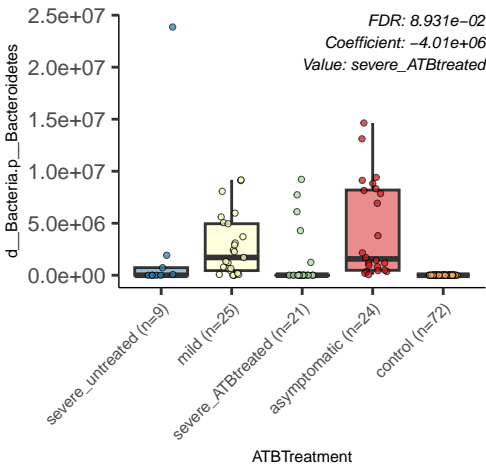

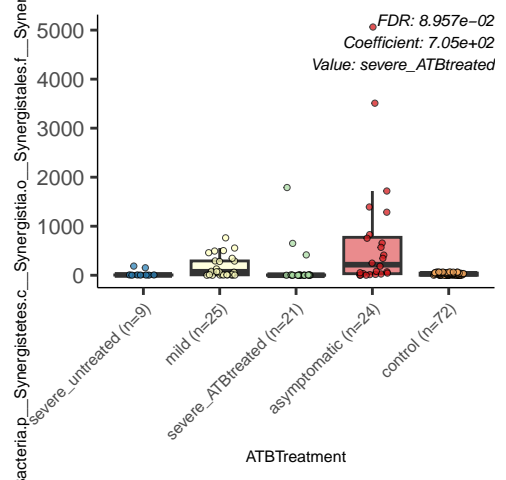

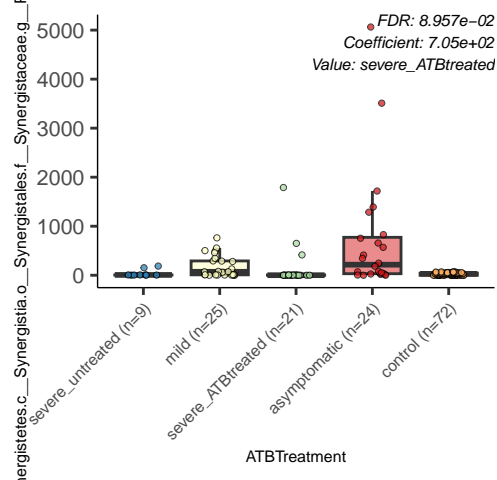

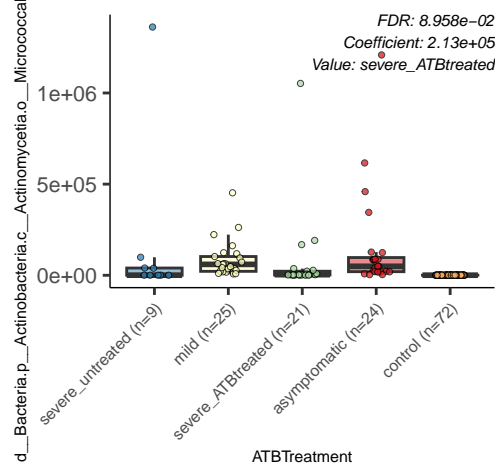

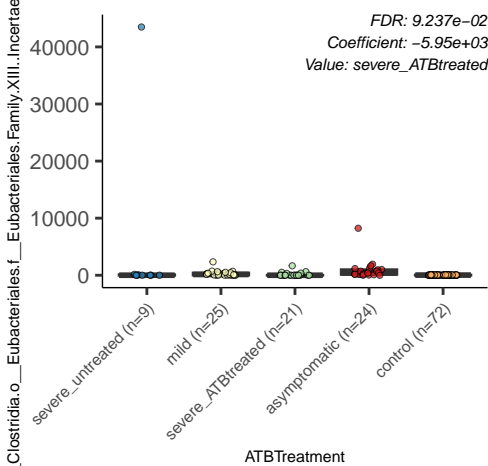

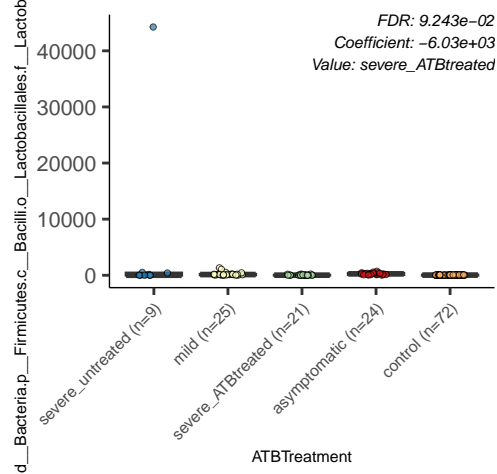



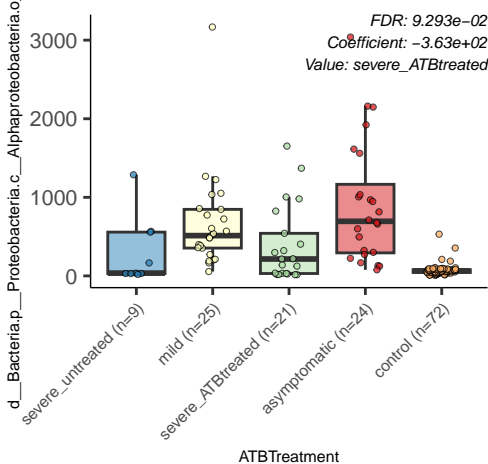

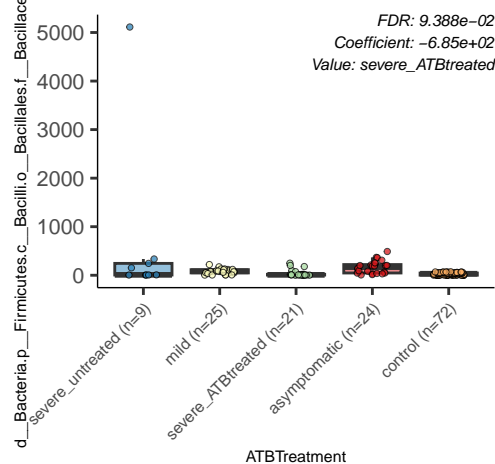

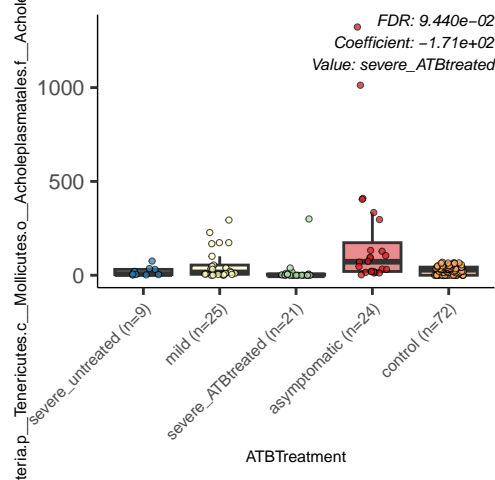

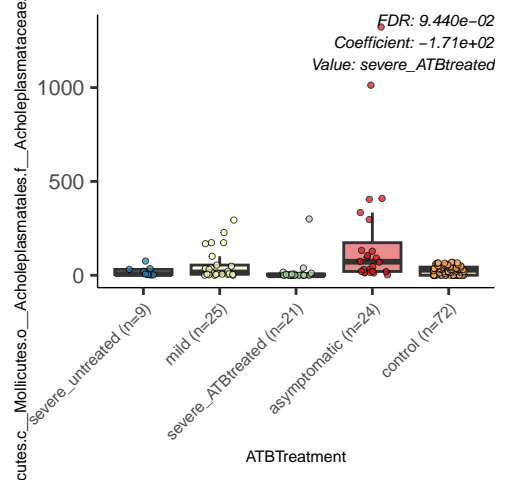

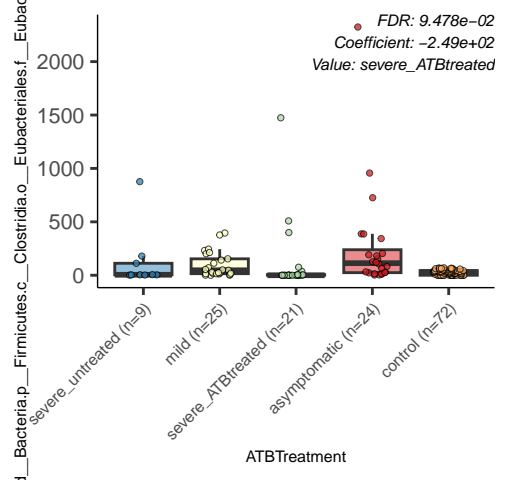

Firmicutes.c\_\_Clostridia.o\_\_Eubacteriales.f\_\_Eubacteriaceae.g

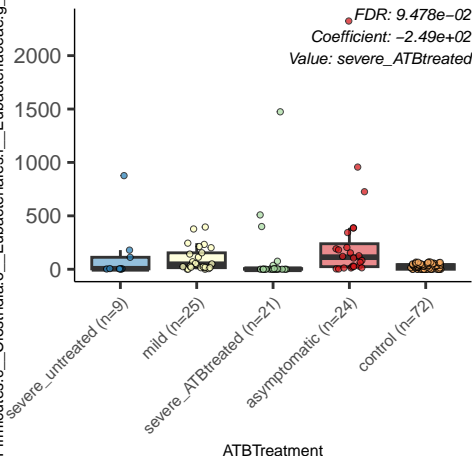

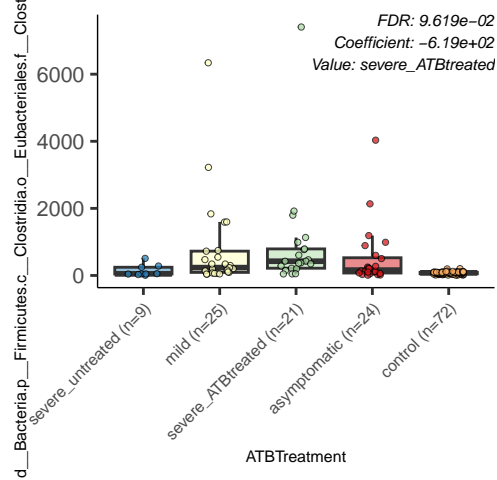

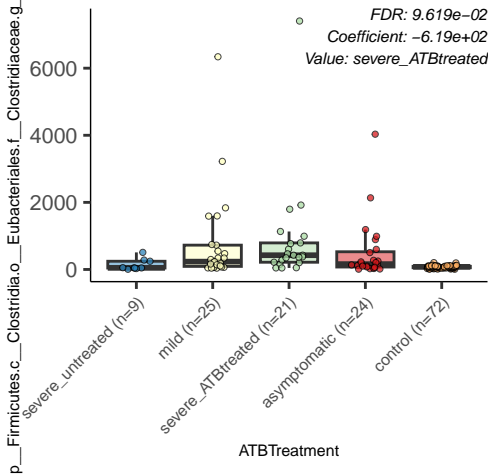



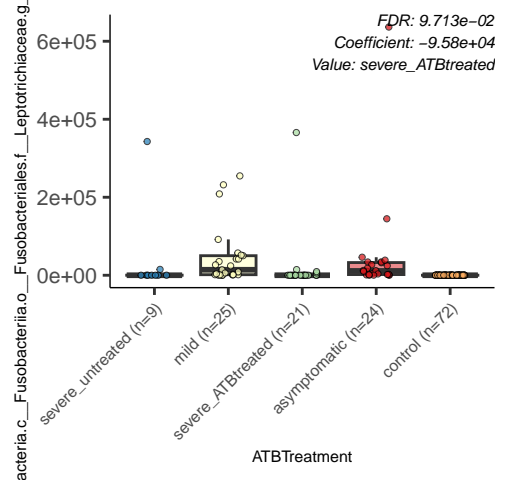

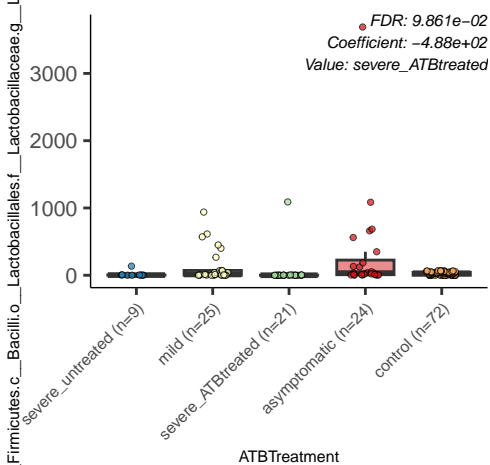

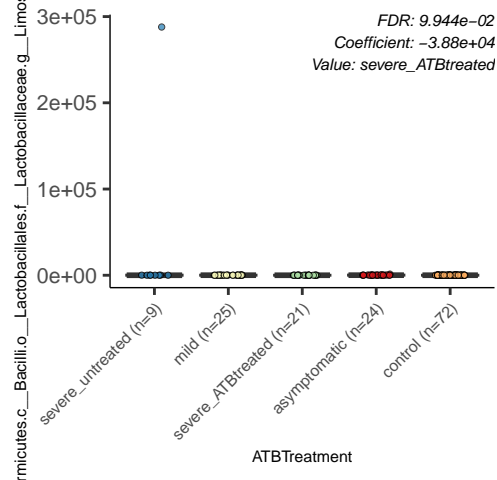

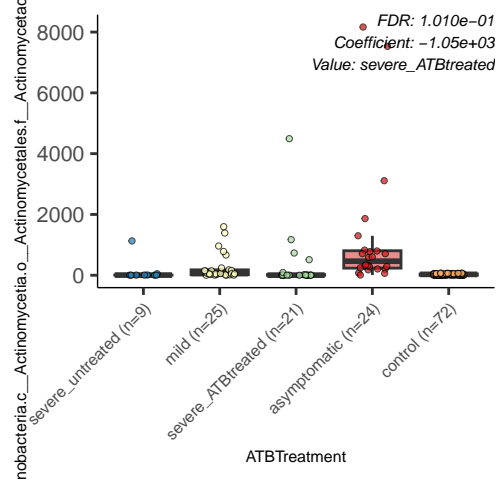

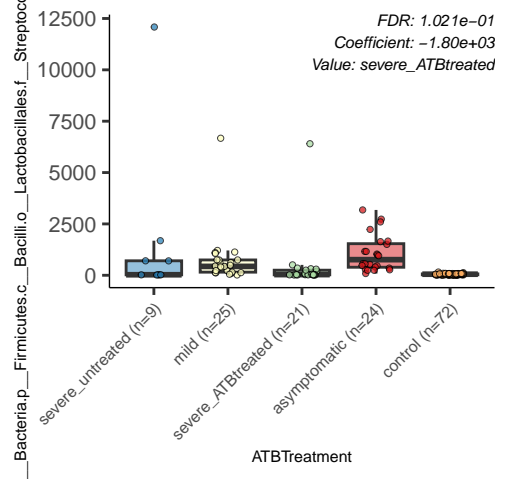

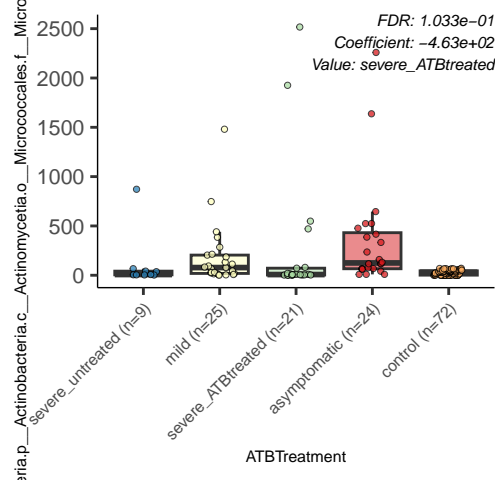

Bacteroidetes.c\_\_Bacteroidia.o\_\_Bacteroidales.f\_\_Bacteroidaceae.g

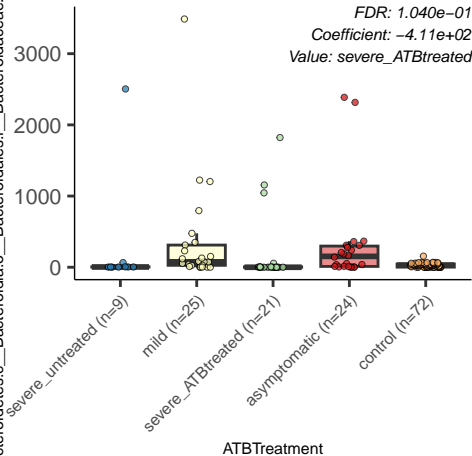

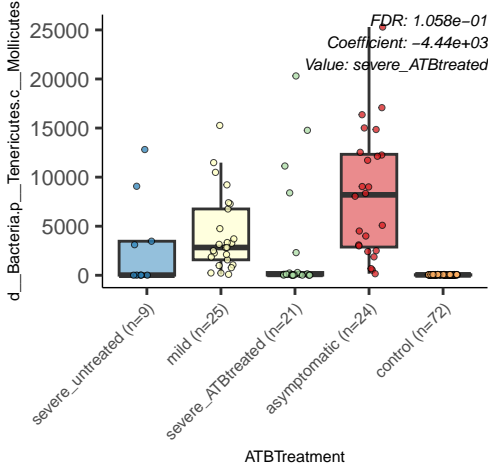



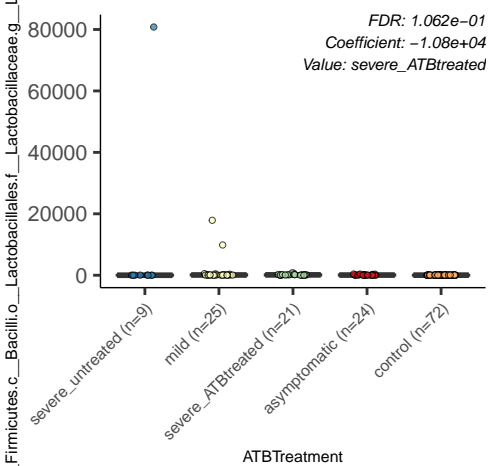

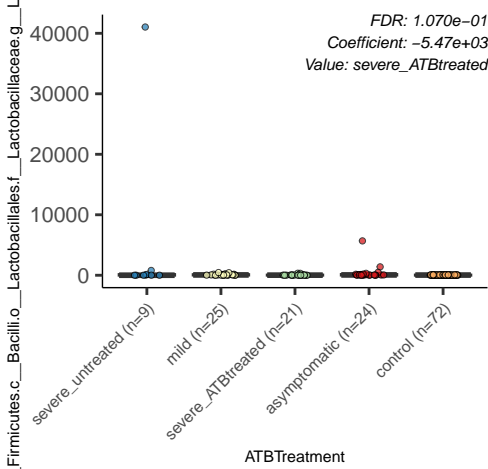

a.p\_Firmicutes.c\_Clostridia.o\_Eubacteriales.f\_Clostridiaceae.g

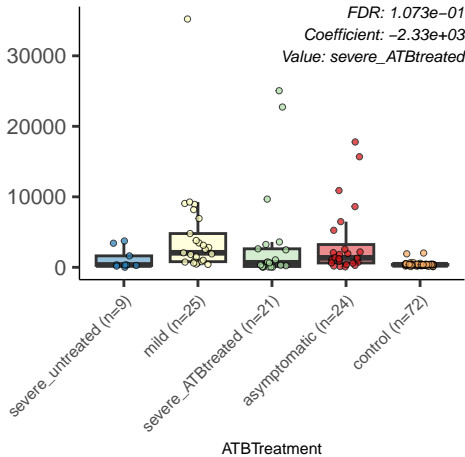



Actinomyces

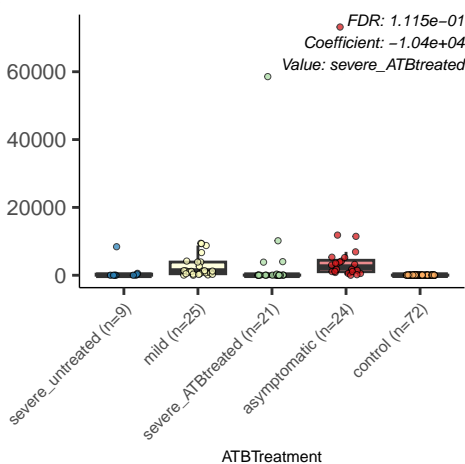

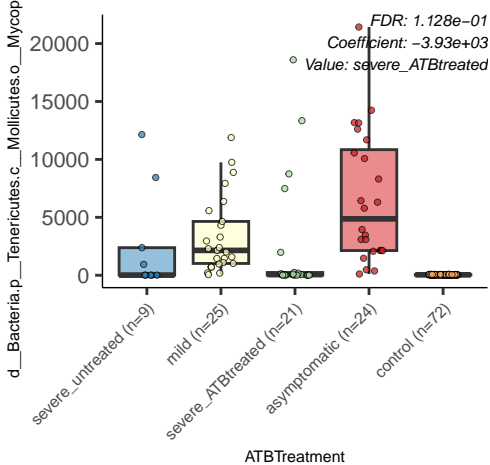

d\_Bacteria.p\_Tenericutes.c\_Mollicutes.o\_Mycoplasmales.

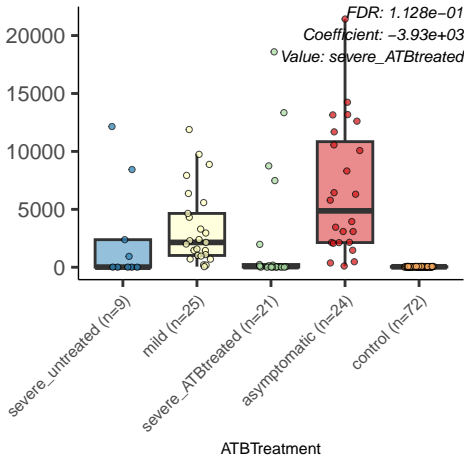

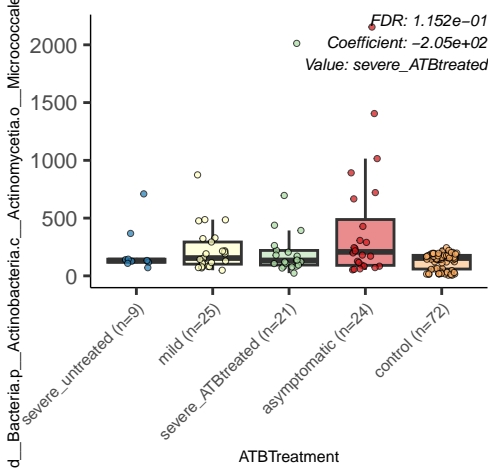



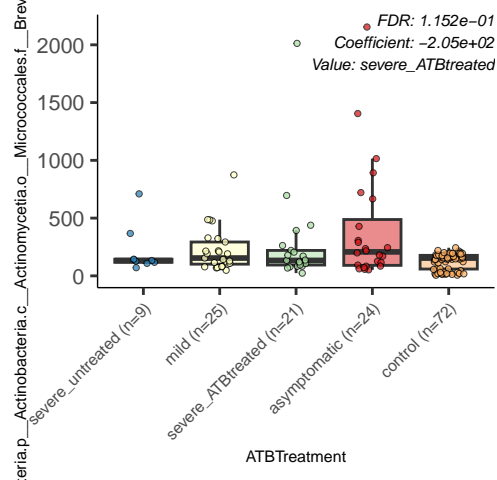



Firmicutes.c\_\_Bacilli.o\_\_Lactobacillales.f\_\_Streptococcaceae.g\_\_S

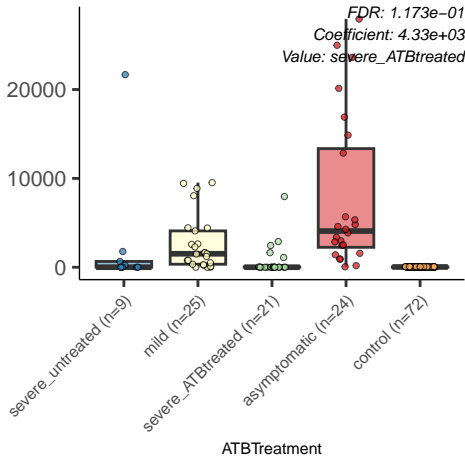

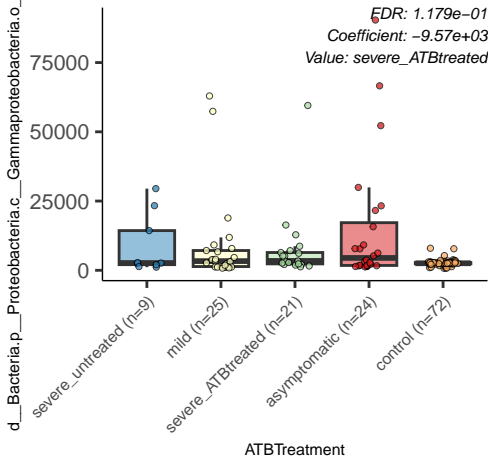

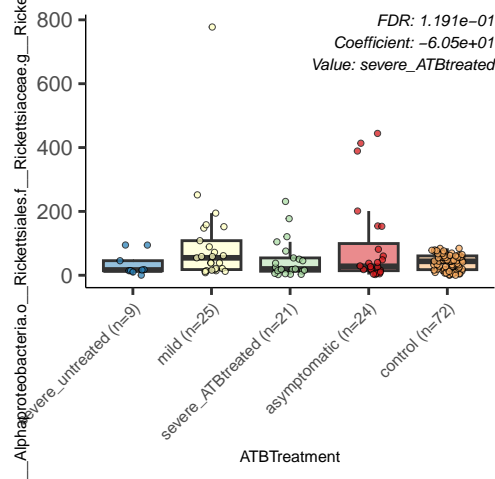

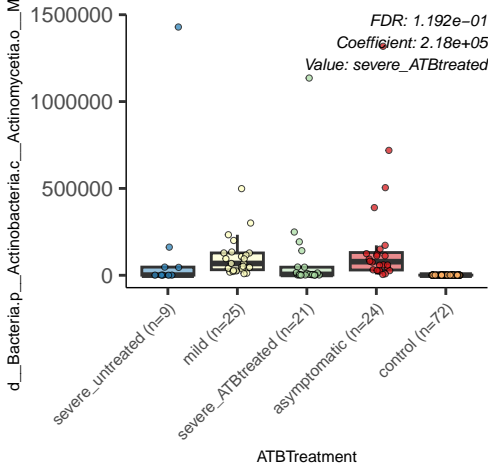

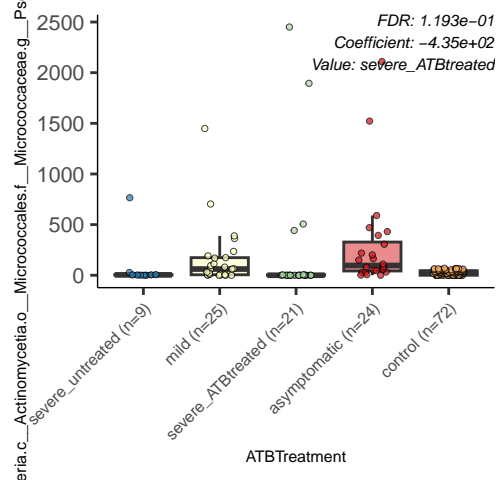

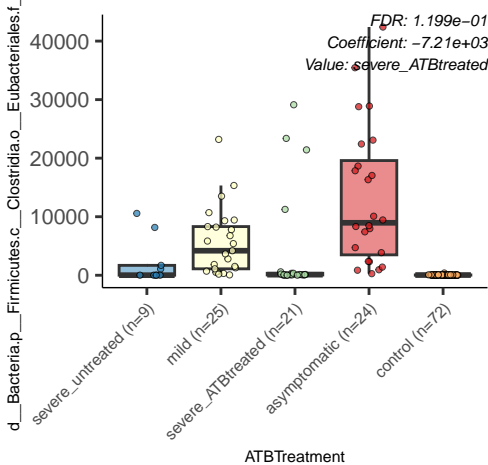



a.c.\_Epsilonproteobacteria.o\_\_Campylobacteriales.f\_\_Campylobact

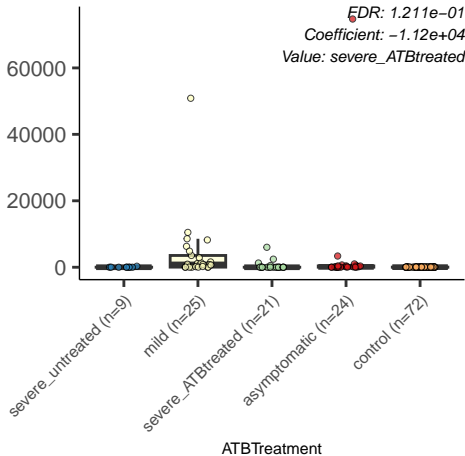

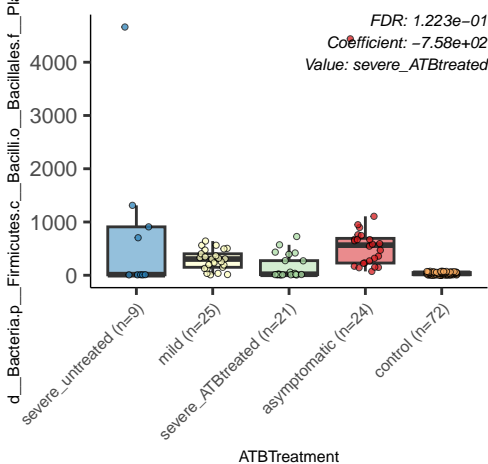

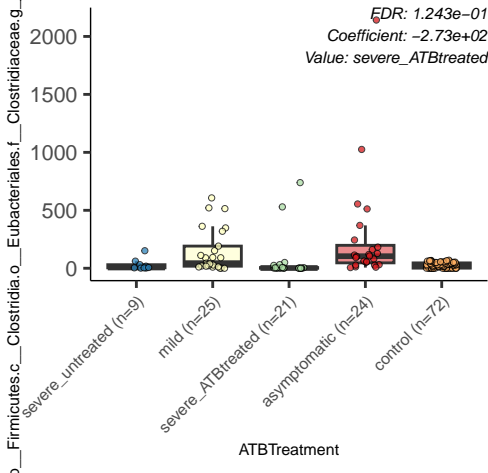

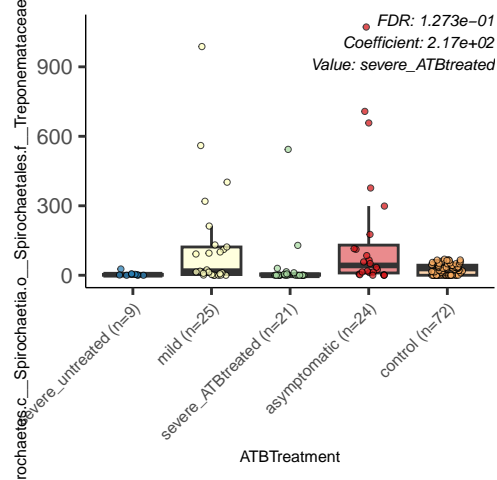



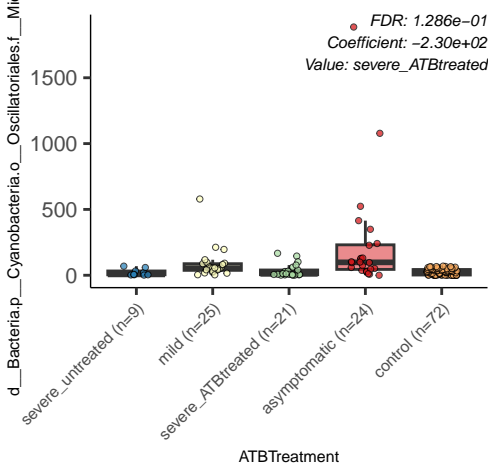

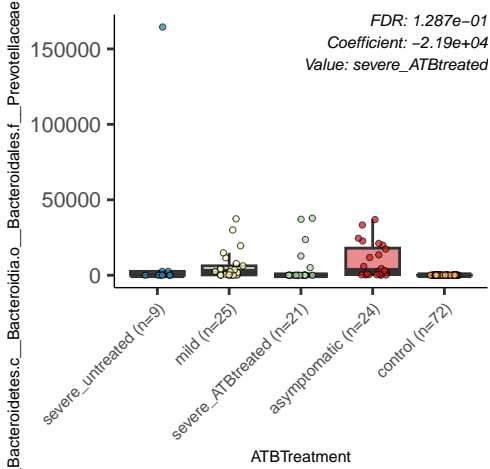

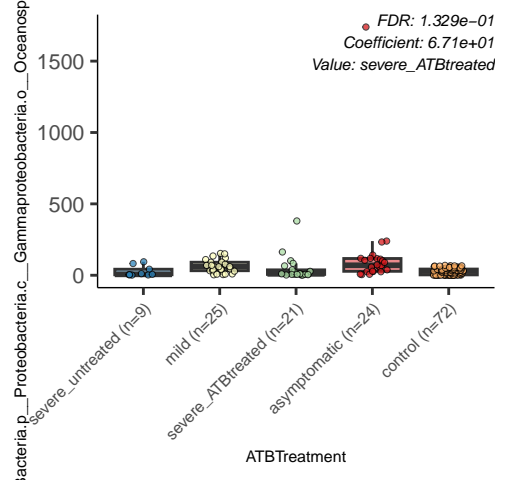



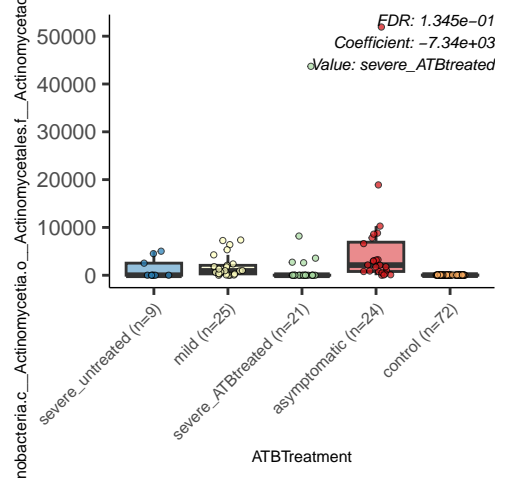

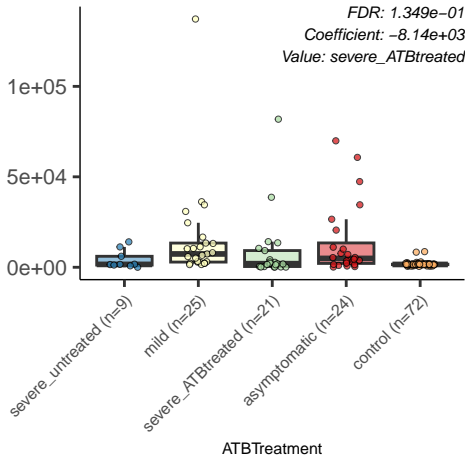

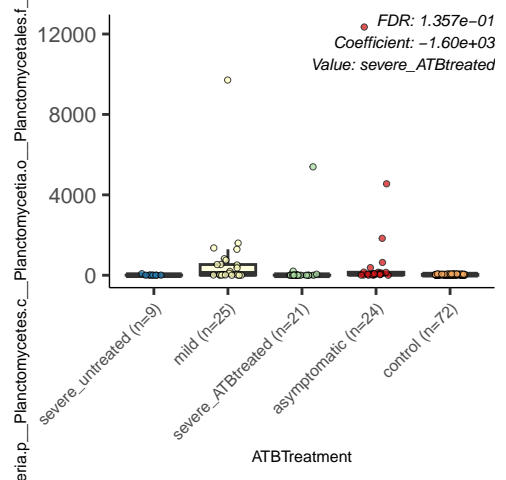

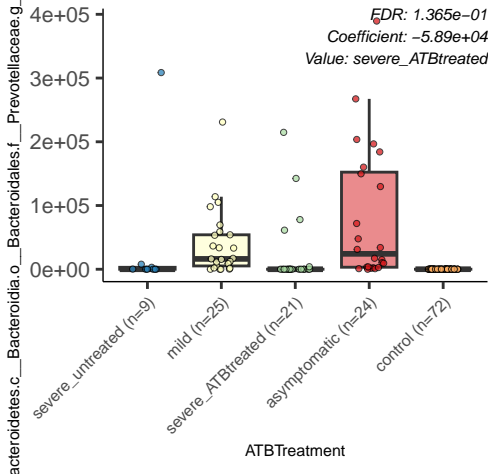

l\_Bacteria.p\_\_Proteobacteria.c\_\_Alphaproteobacteria.o\_\_Ricketts

FDR:  $1.366e-01$   
Coefficient:  $-1.91e+02$   
Value: severe\_ATBtreated

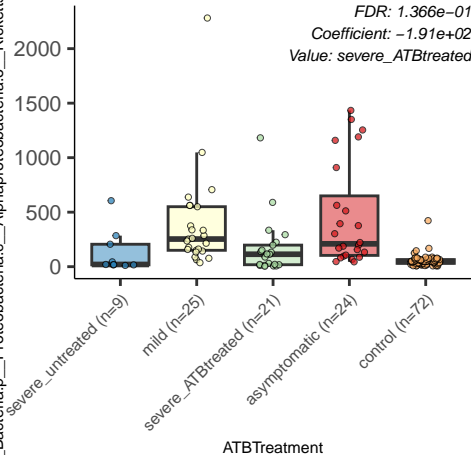

.p\_\_Proteobacteria.c\_\_Gammaproteobacteria.o\_\_Oceanospirillales

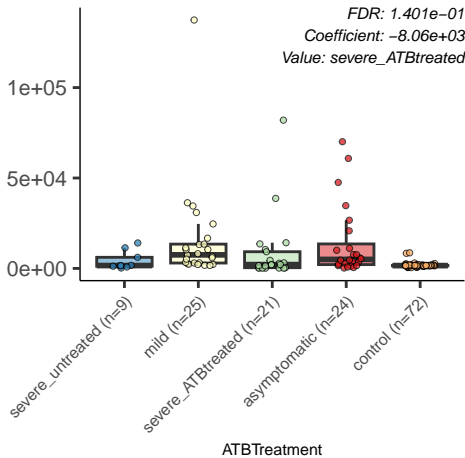

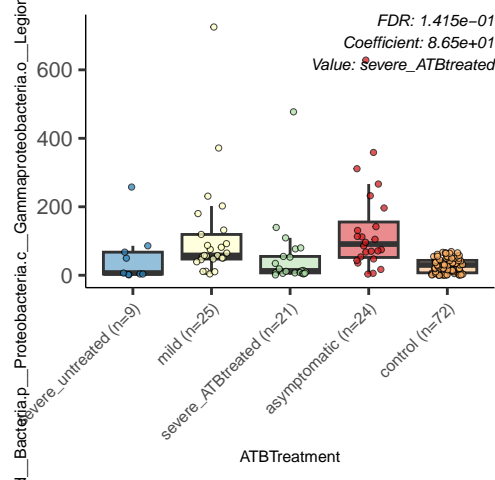

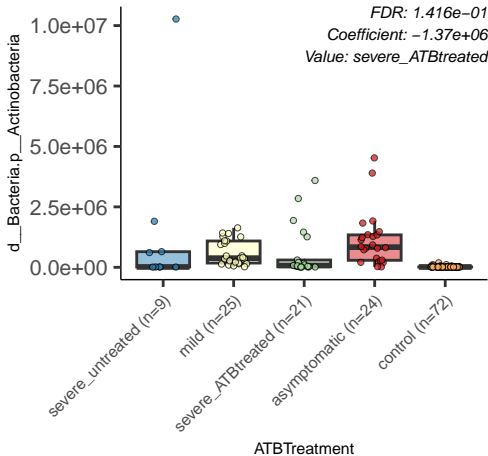



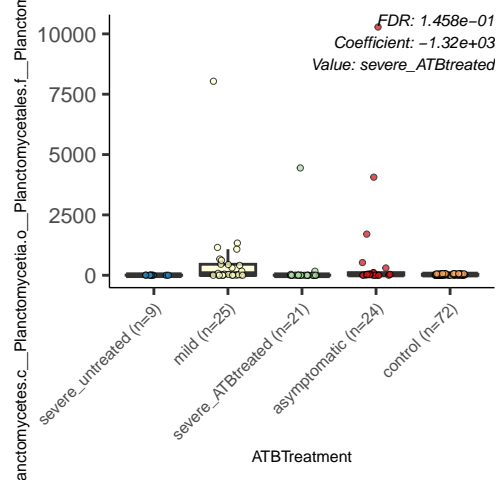

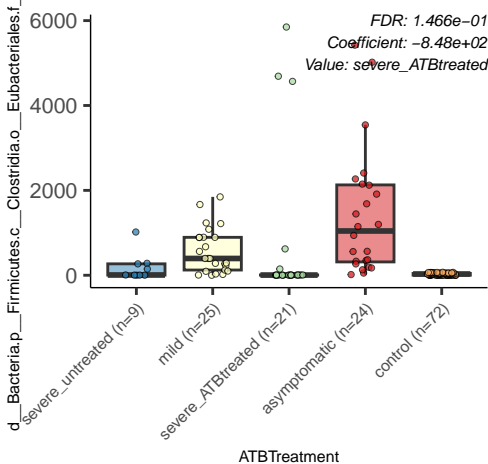

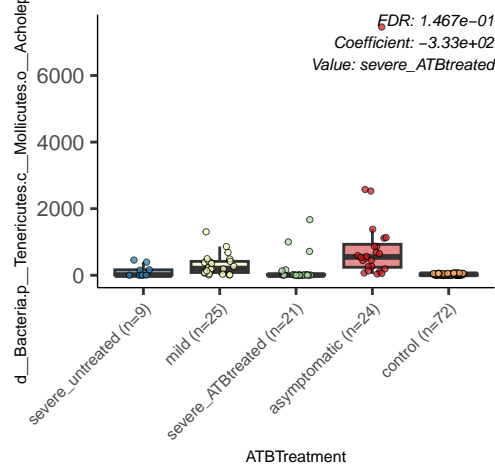

d\_Bacteria.p\_\_Tenericutes.c\_\_Mollicutes.o\_\_Acholeplasmatales.

FDR:  $1.467 \times 10^{-1}$   
Coefficient:  $-3.33 \times 10^2$   
Value: severe\_ATBtreated

6000

4000

2000

0

severe\_unreated (n=9)

mild (n=25)

severe\_ATBtreated (n=21)

asymptomatic (n=24)

control (n=72)

ATBTreatment

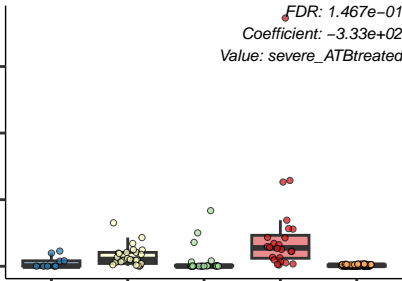

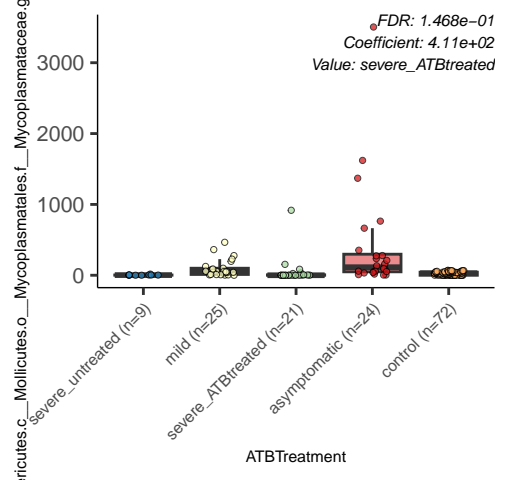

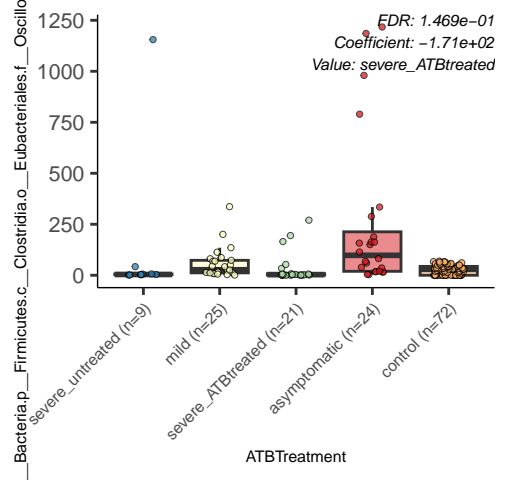

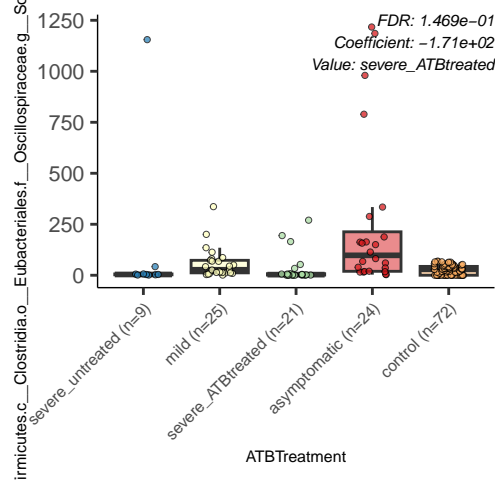

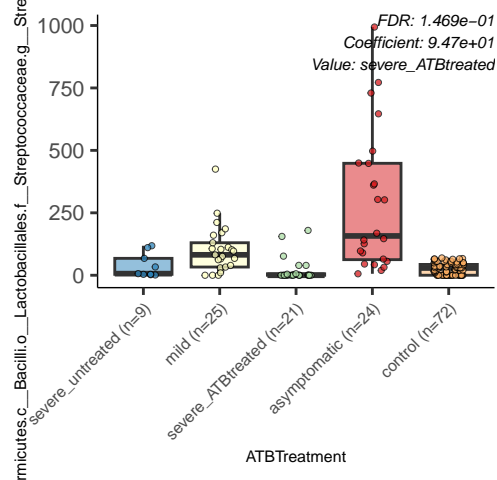



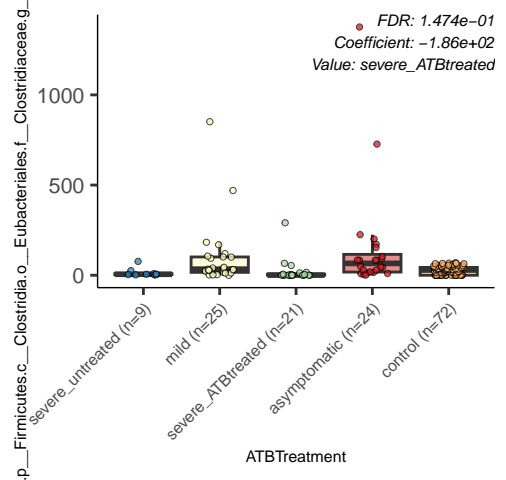

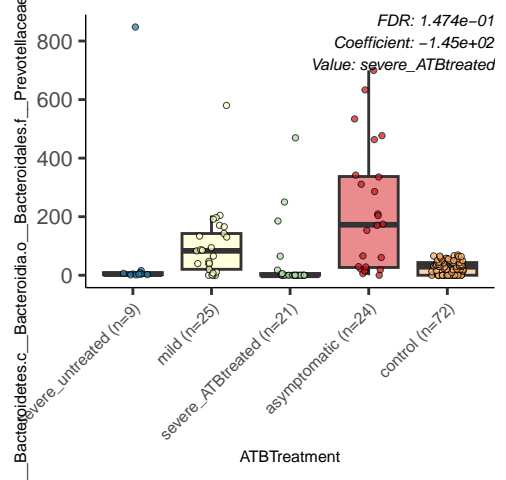

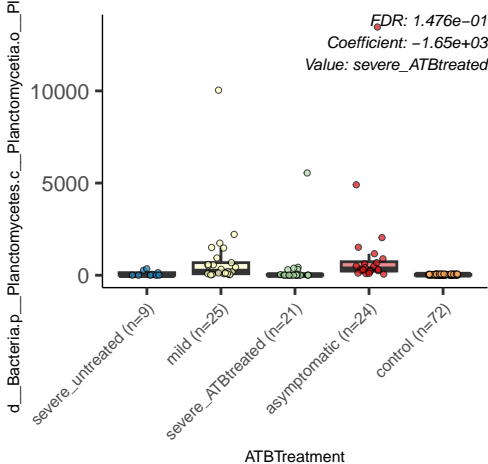

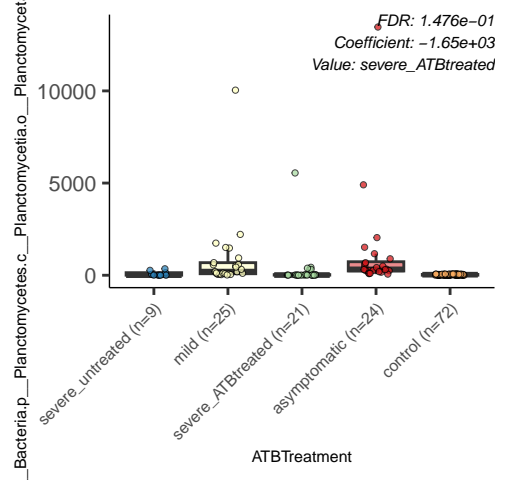

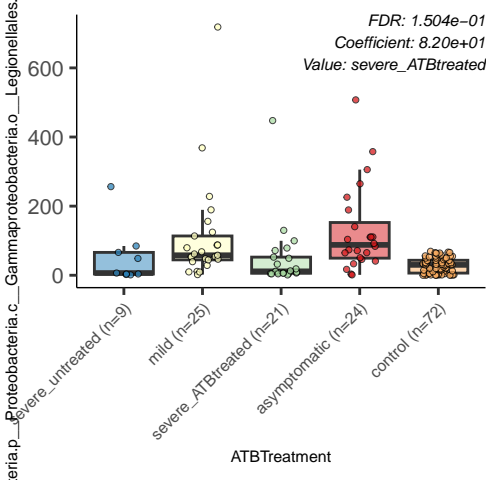

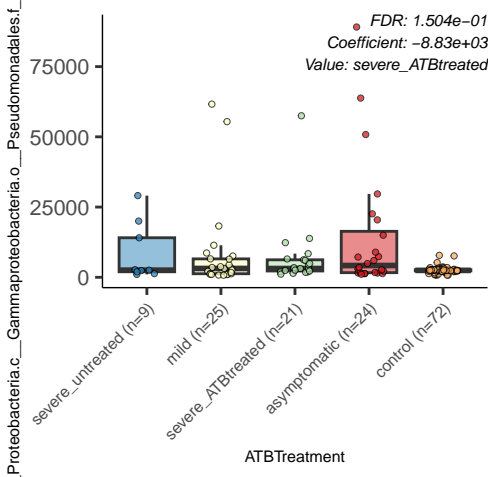



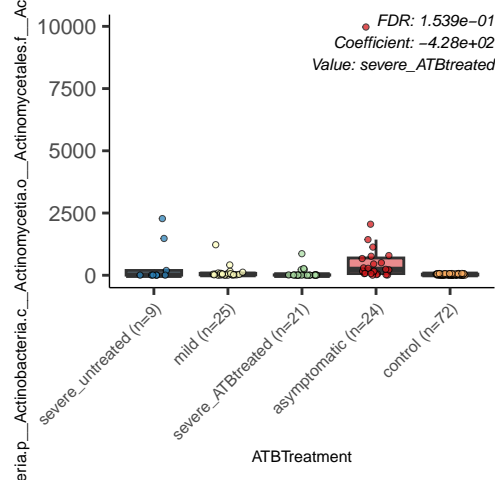



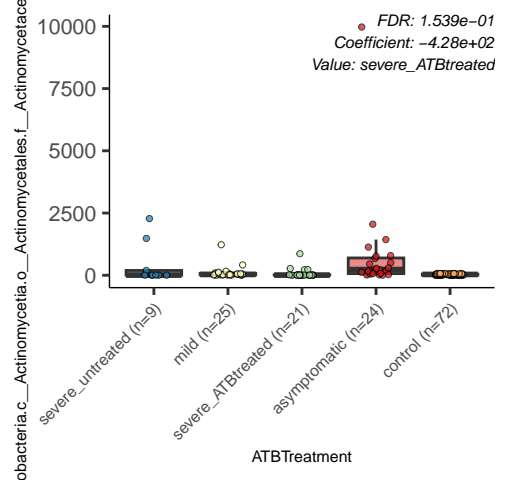

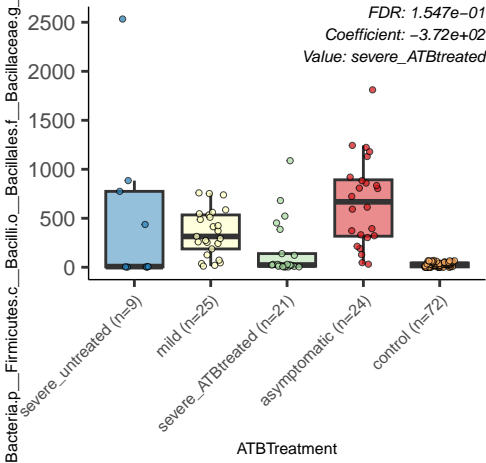

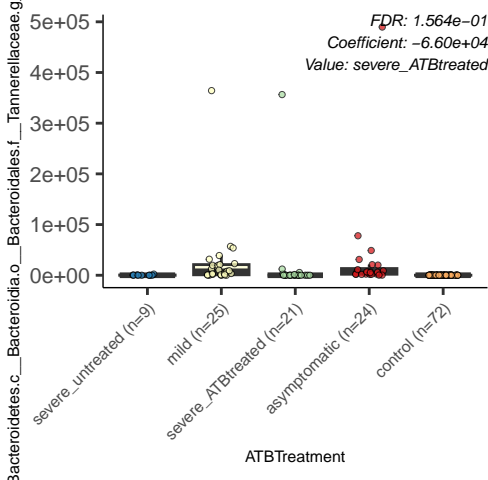

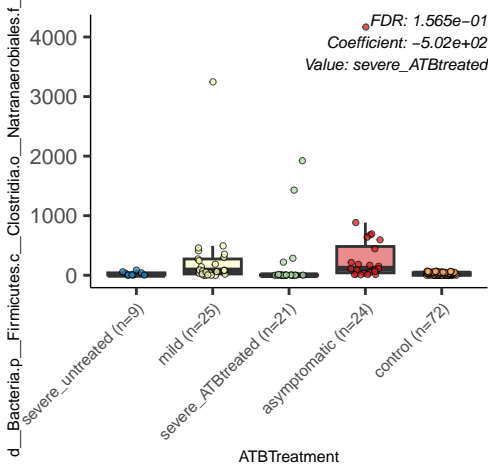

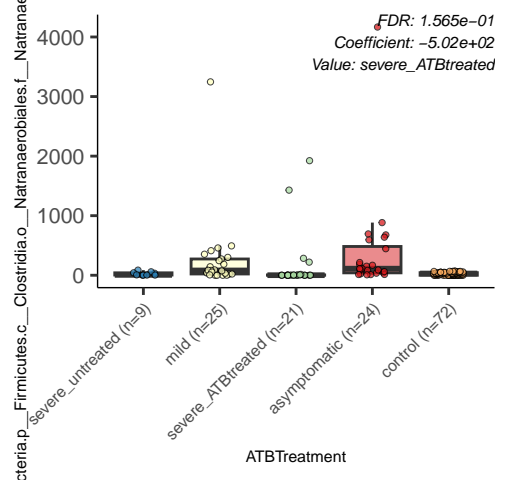

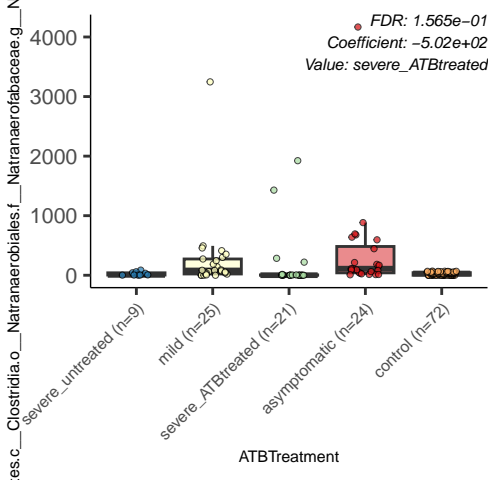

roidetes.c\_Flavobacteriia.o\_Flavobacteriales.f\_Flavobacteriaceae

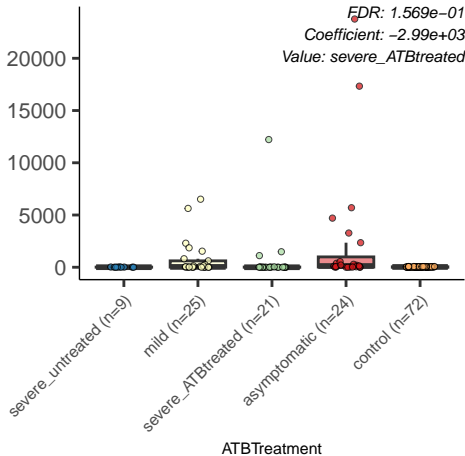

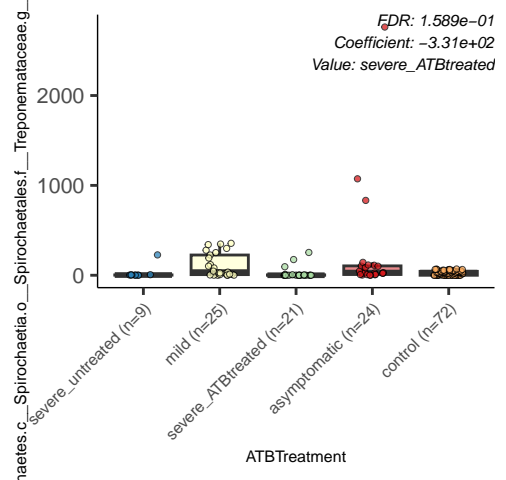



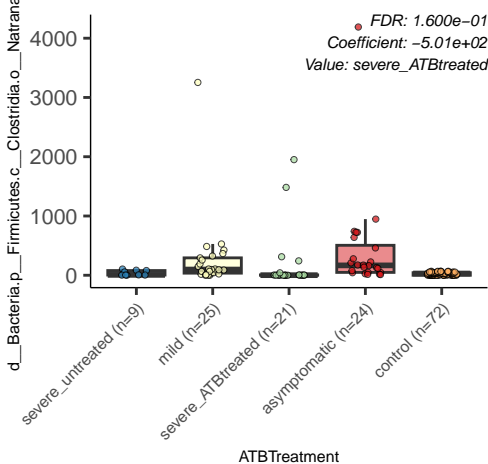

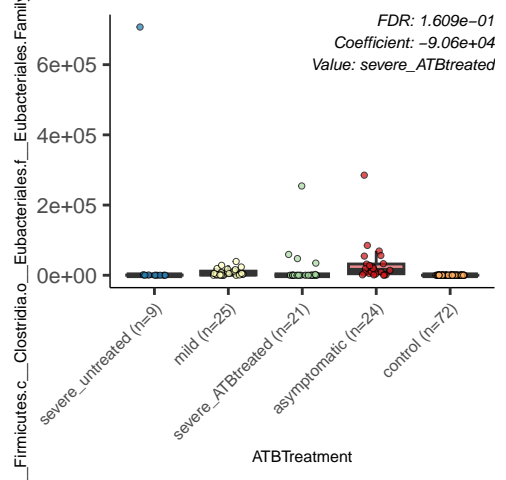

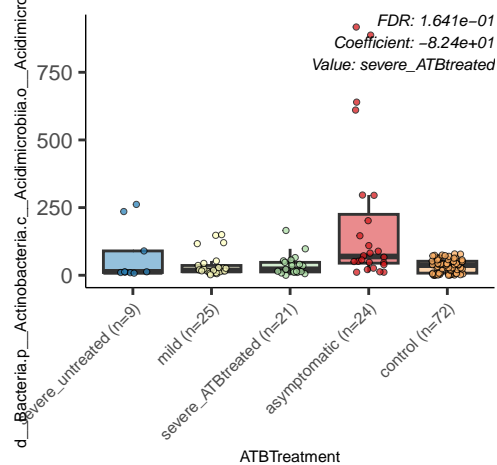

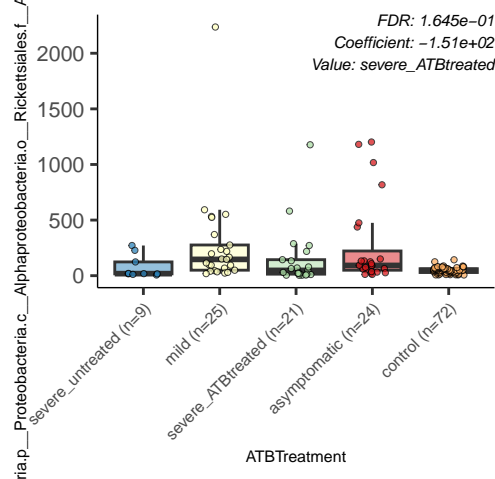

acteria.p\_Firmicutes.c\_Clostridia.o\_Eubacteriales.f\_Eubacteri

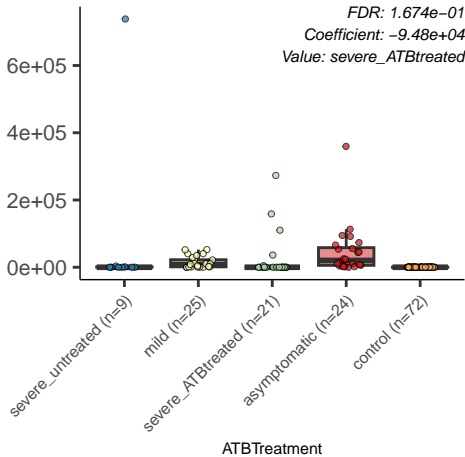

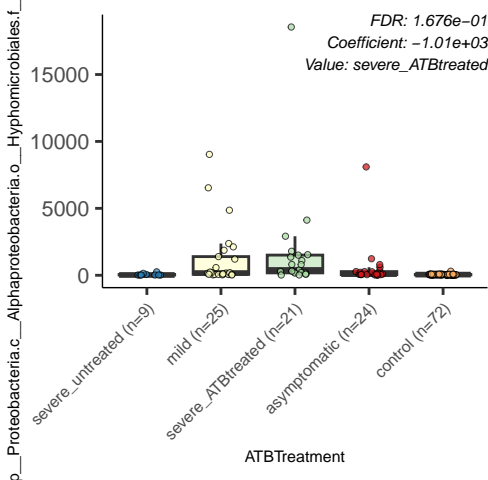

p\_\_Firmicutes.c\_\_Negativicutes.o\_\_Veillonellales.f\_\_Veillonellaceae

FDR:  $1.677\text{e-}01$   
Coefficient:  $-2.04\text{e+}05$   
Value: severe\_ATBtreated

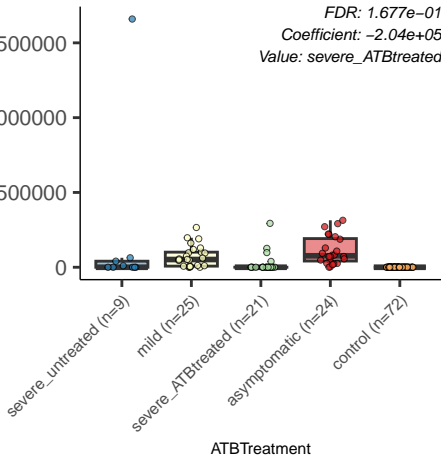

bidetes.c\_\_Bacteroidia.o\_\_Bacteroidales.f\_\_Porphyromonadaceae.g

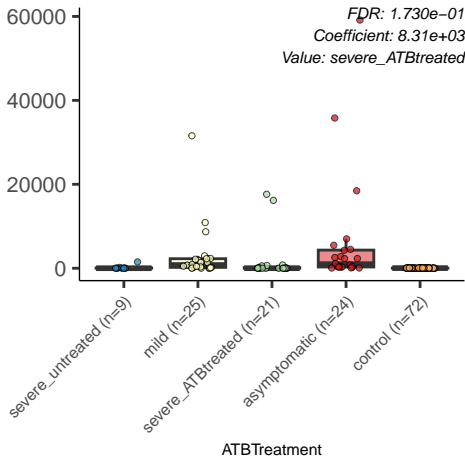



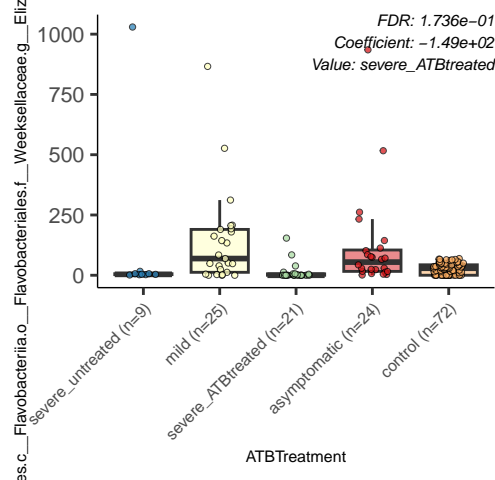

Bacteria.p\_\_Proteobacteria.c\_\_Gammaproteobacteria.o\_\_Oceanos

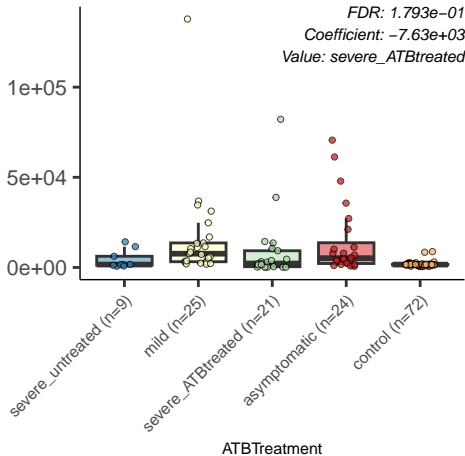

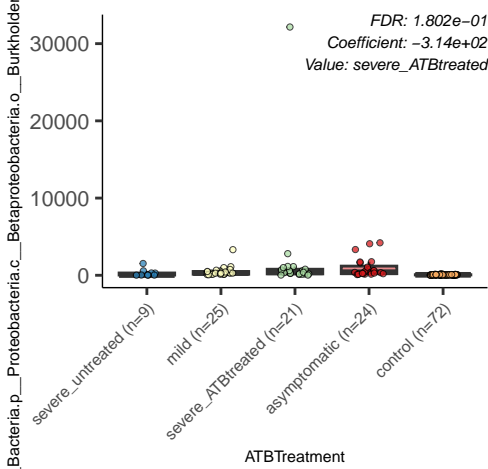

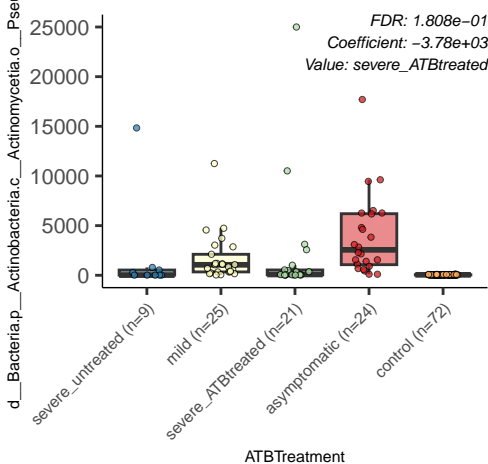

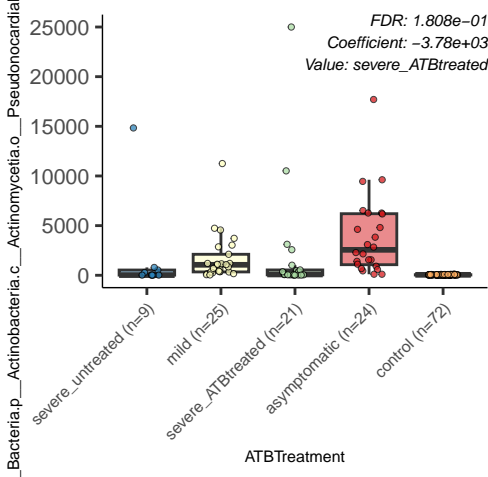

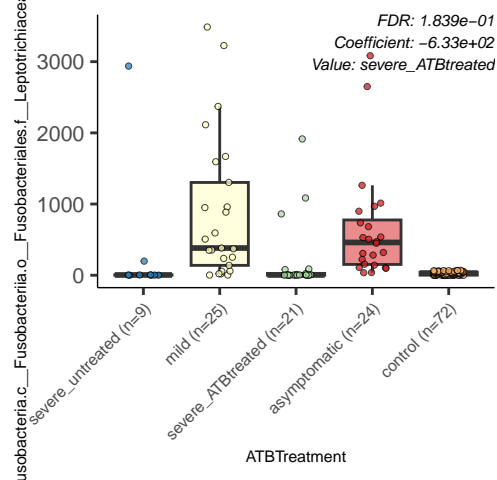

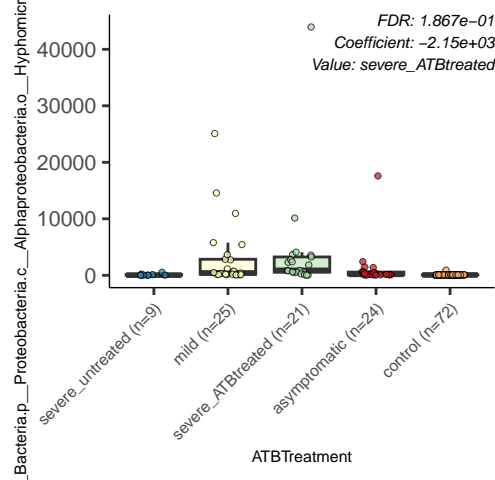

\_\_Bacteroidetes.c\_\_Bacteroidia.o\_\_Bacteroidales.f\_\_Prevotellaceae

FDR:  $1.901e-01$   
Coefficient:  $-2.90e+04$   
Value: severe\_ATBtreated

150000

100000

50000

0

severe\_unreated (n=9)

mild (n=25)

severe\_ATBtreated (n=21)

asymptomatic (n=24)

control (n=72)

ATBTreatment

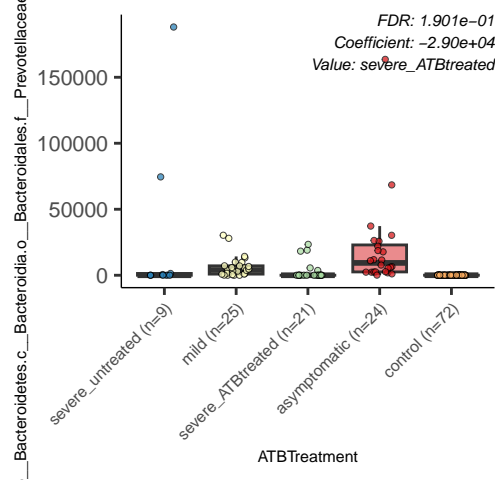



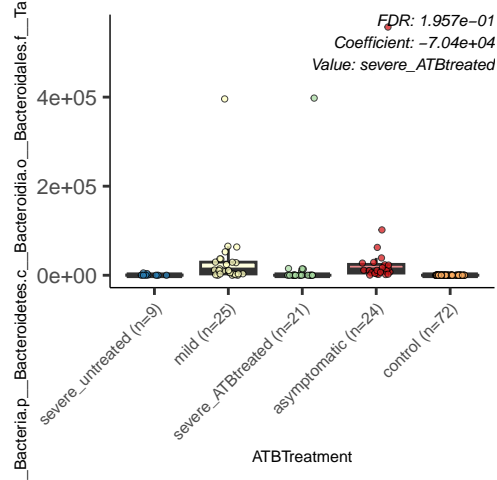

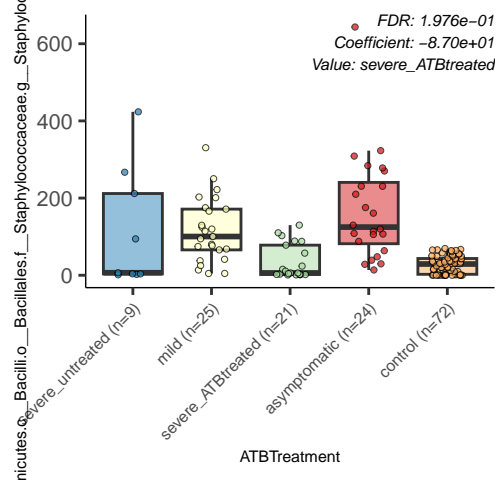

Firmicutes.c\_\_Bacilli.o\_\_Lactobacillales.f\_\_Streptococcaceae.g\_\_Str

FDR: 1.984e-01  
Coefficient: 1.57e+02  
Value: severe\_ATBtreated

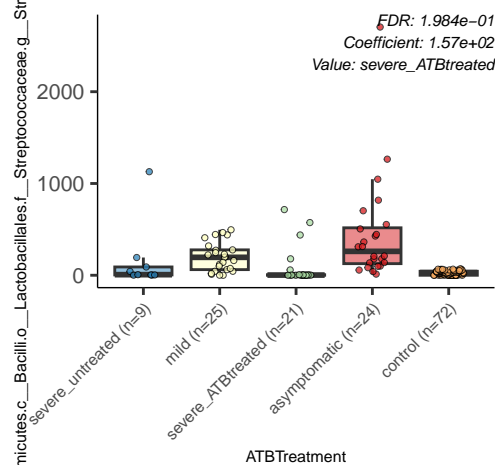

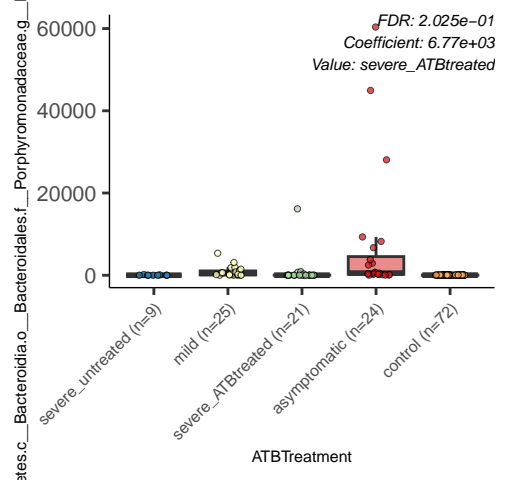

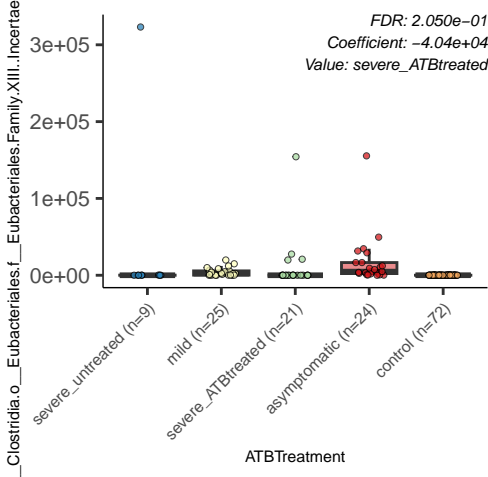

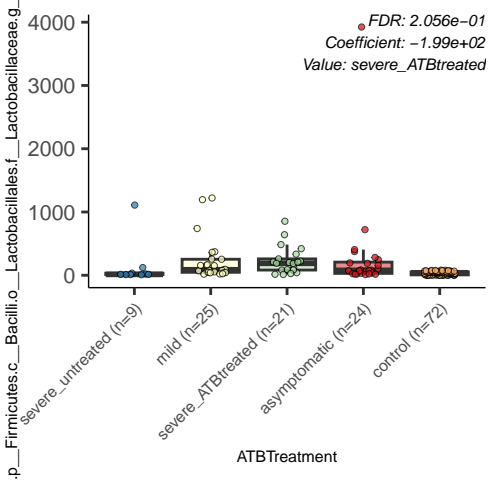

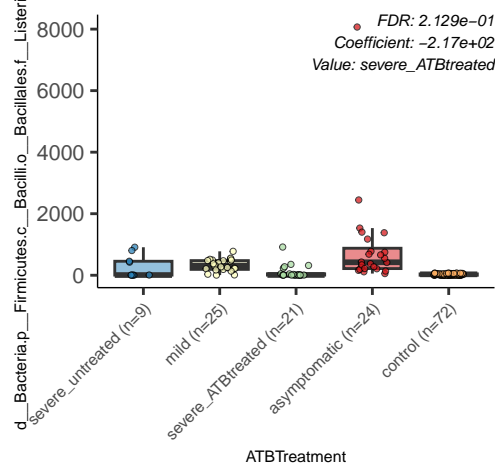

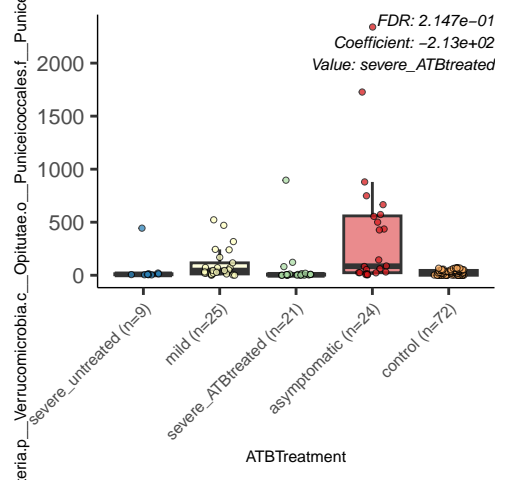



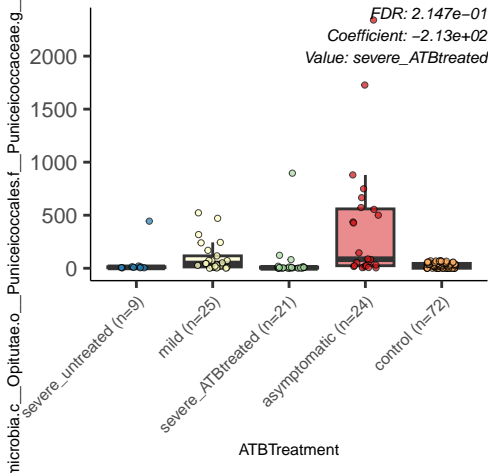

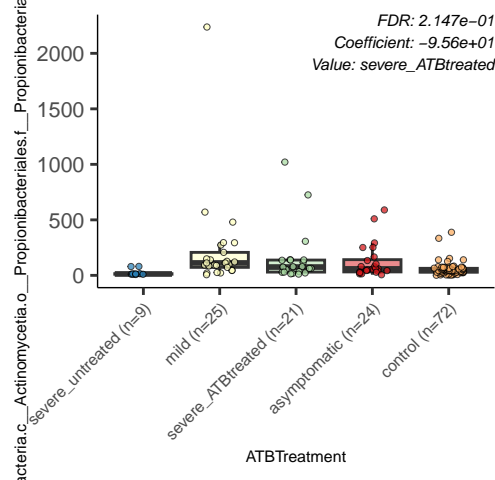

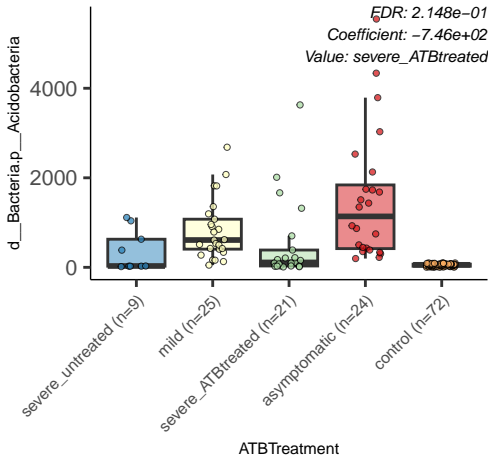

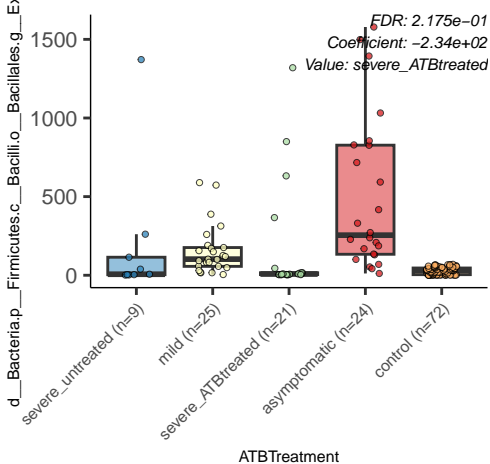

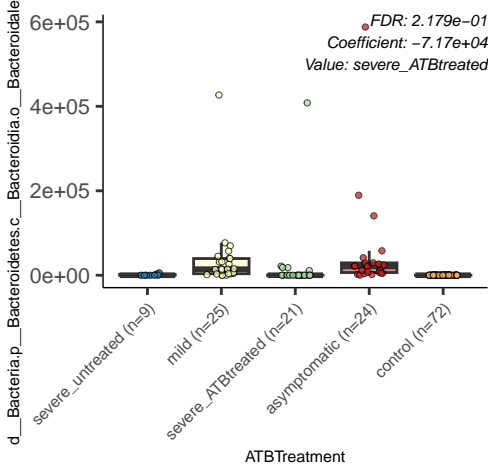

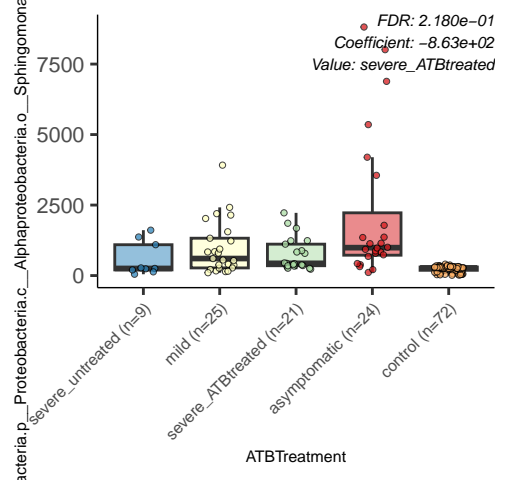

acteria.p\_Bacteroidetes.c\_Flavobacteriia.o\_Flavobacteriales.f

FDR: 2.183e-01  
Coefficient: -1.71e+03  
Value: severe\_ATBtreated

10000

5000

0

severe\_untreated (n=9)

mild (n=25)

severe\_ATBtreated (n=21)

asymptomatic (n=24)

control (n=72)

ATBTreatment

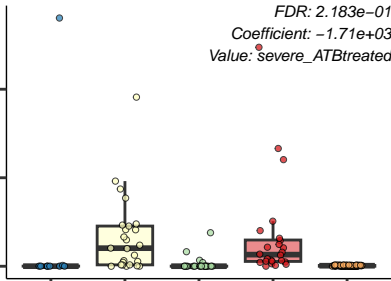

Bacteroidetes.c\_Flavobacteriia.o\_Flavobacteriales.f\_Weeksellac

FDR:  $2.183e-01$   
Coefficient:  $-1.71e+03$   
Value: severe\_ATBtreated

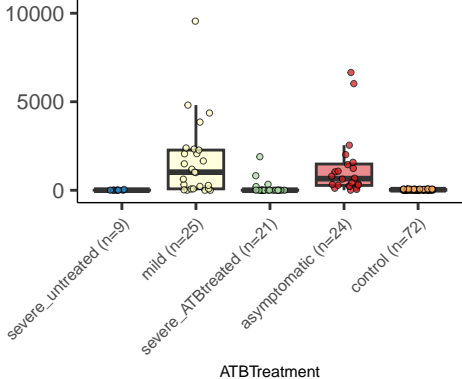



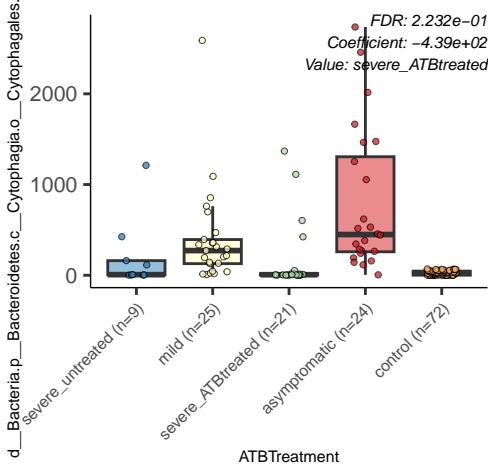

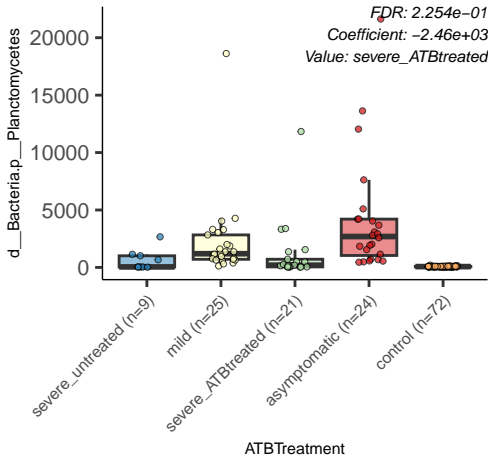

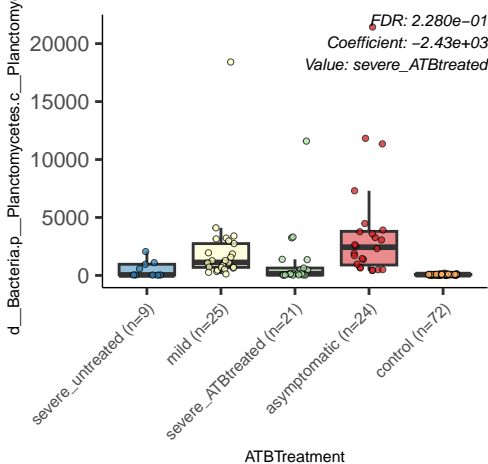

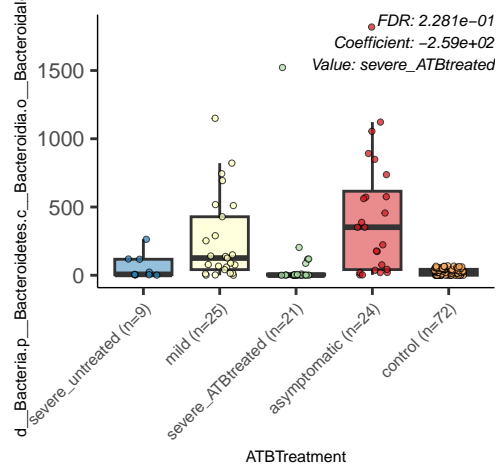

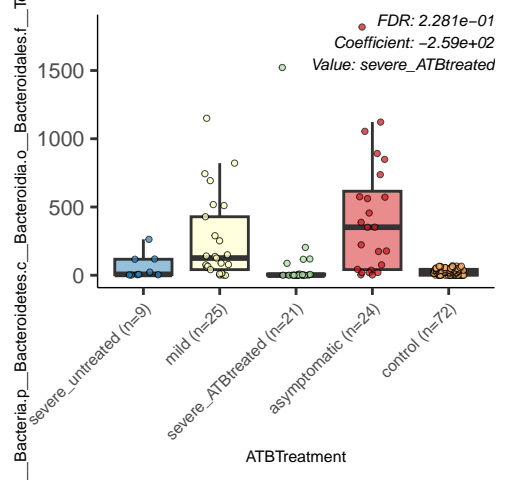

Bacteroidetes.c\_Bacteroidia.o\_Bacteroidales.f\_Tenuifilaceae.g

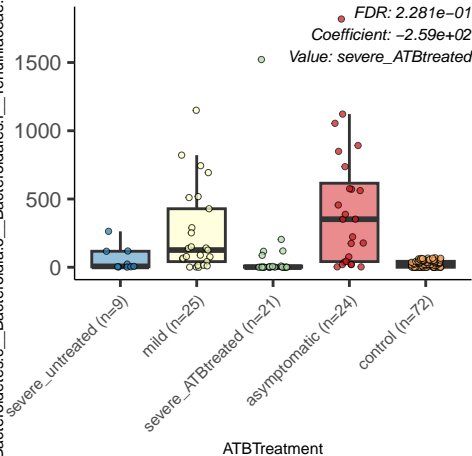

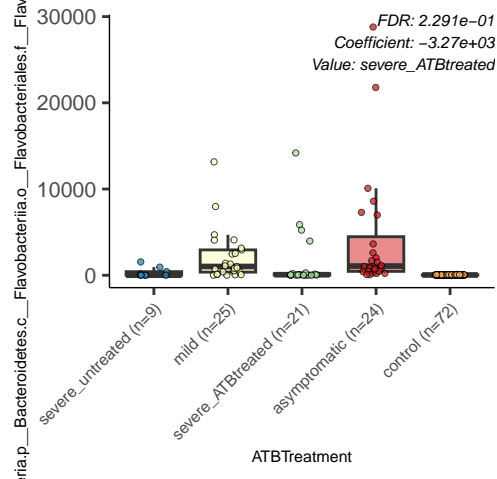

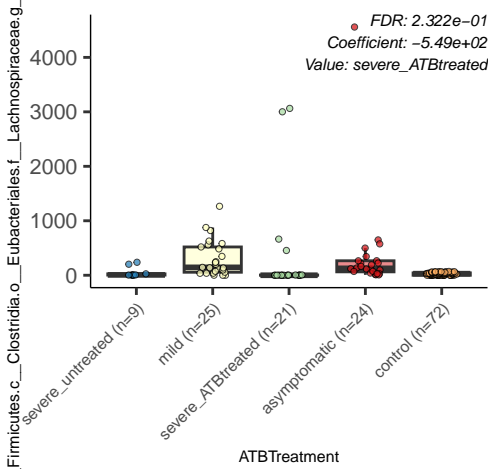



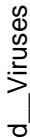

*FDR: 2.322e-01*

Coefficient:  $-1.94e+06$

Value: severe\_ATBtreated

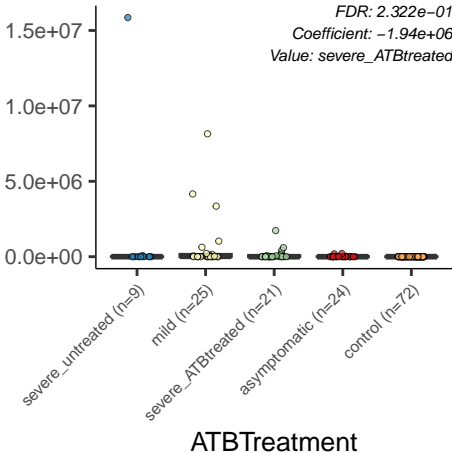

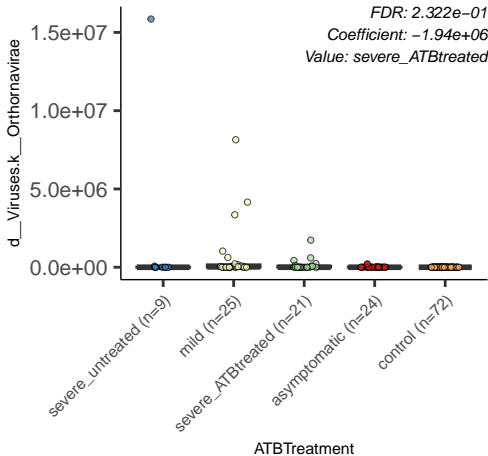

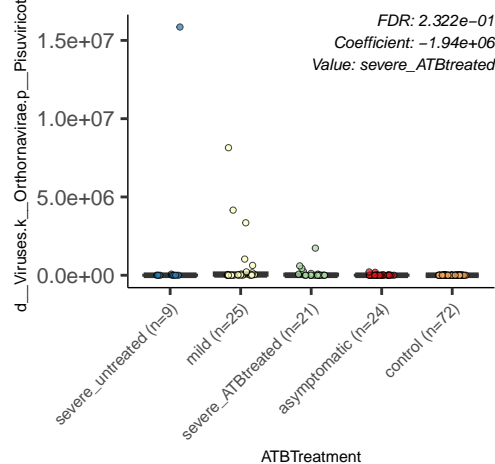

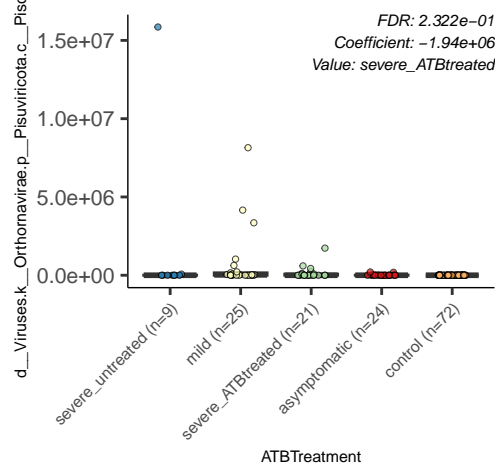

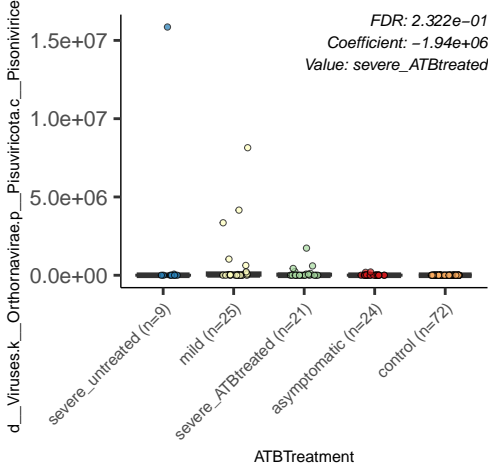

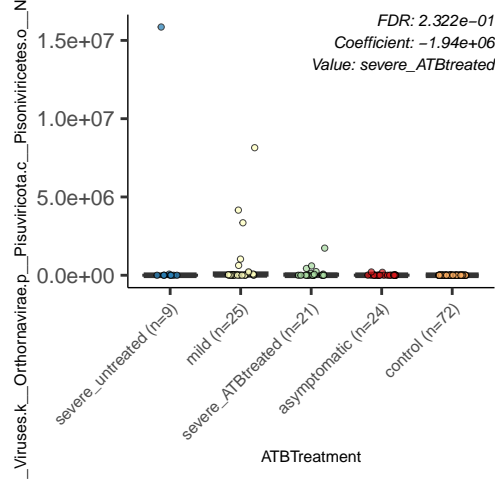

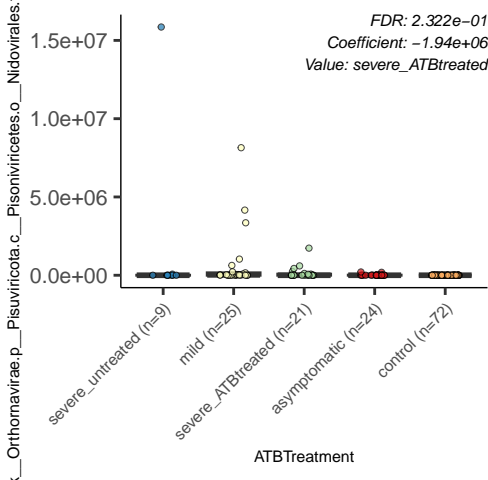

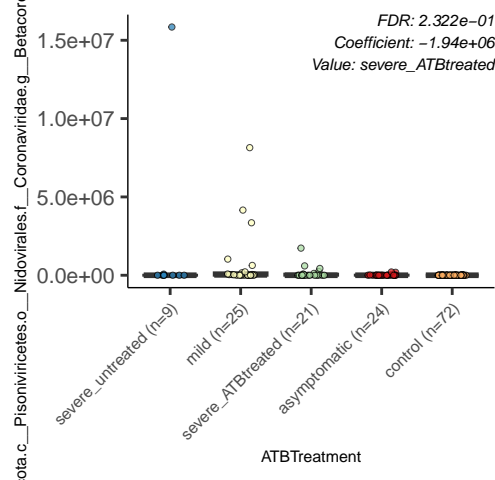



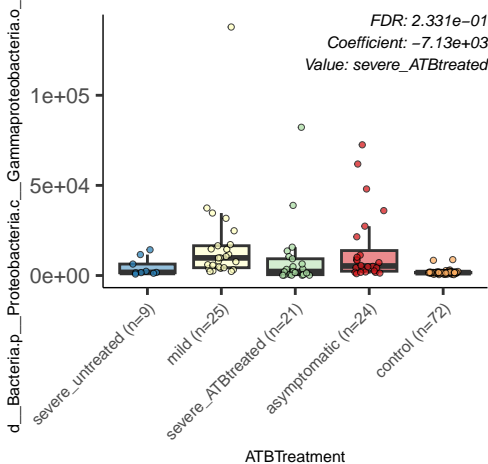

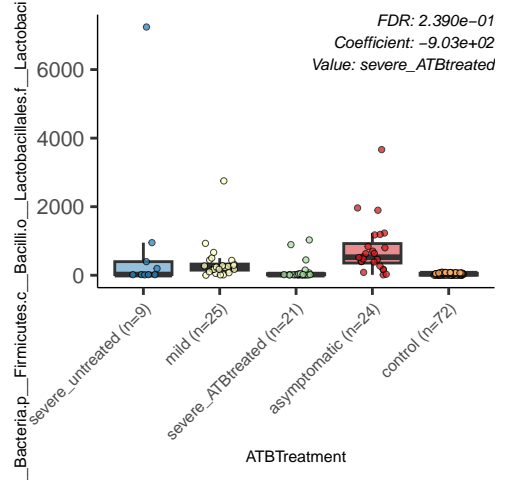

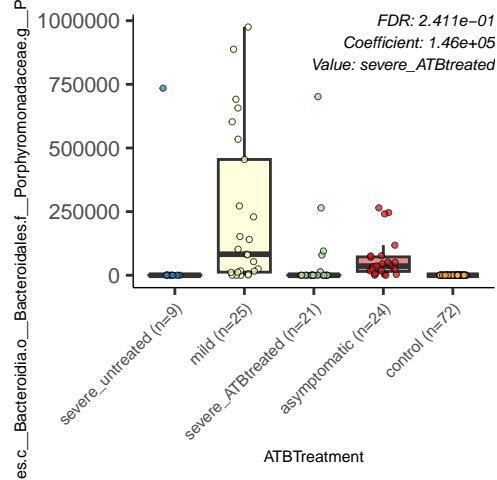

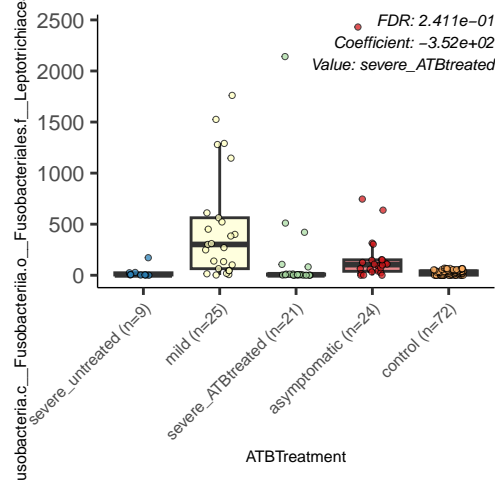

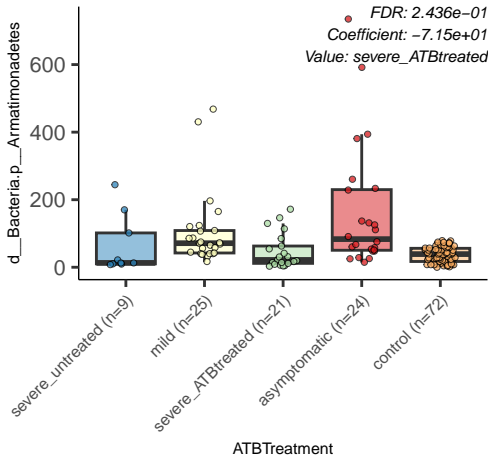

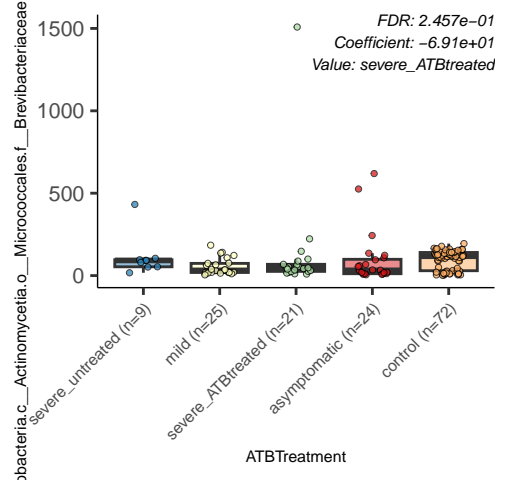

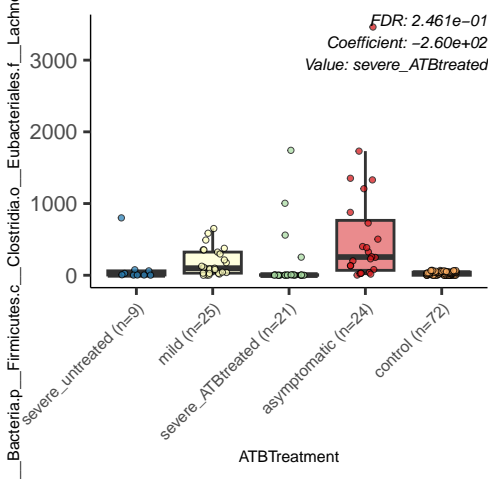

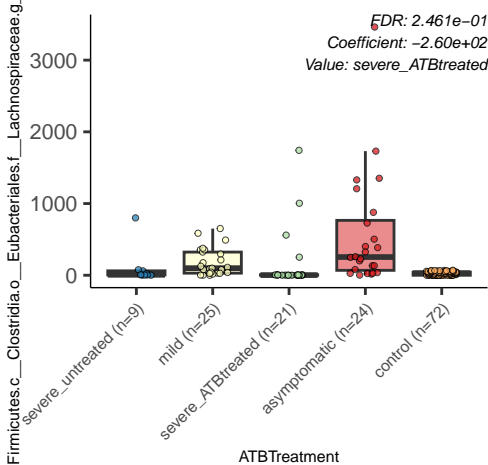

Supplement: s1 [file s1]
