# Supplementary material for: Metatranscriptome Analysis of Nasopharyngeal Swabs across the Varying Severity of COVID-19 Disease Demonstrated Unprecedented Species Diversity
Source: MDPI journal article supplement (doi:10.3390/microorganisms11071804), 2023-07-14

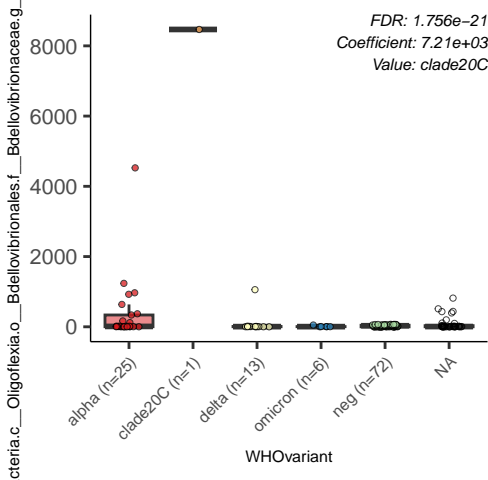

ia.p\_\_Proteobacteria.c\_\_Oligoflexia.o\_\_Bdellovibrionales.f\_\_Bdellov

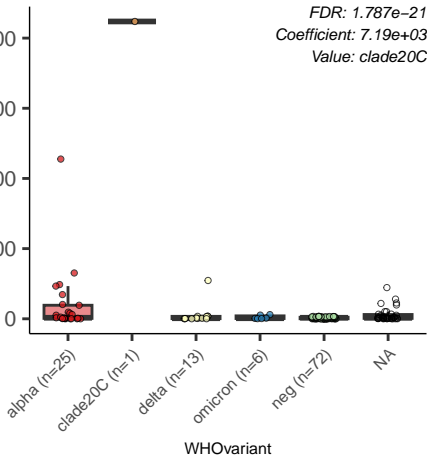

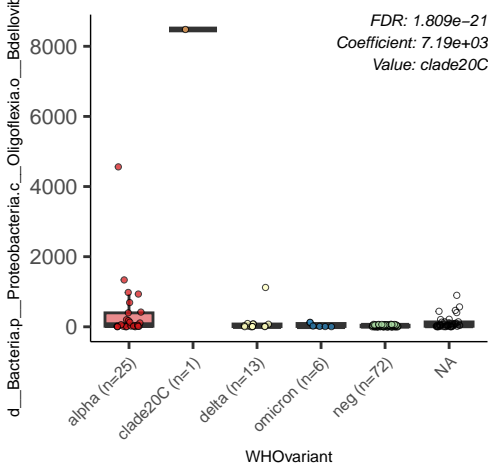

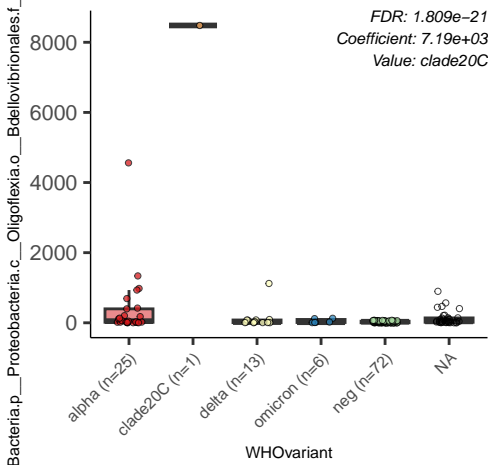



\$spirochaetes.c\_\_Spirochaetia.o\_\_Spirochaetales.f\_\_Borreliaceae.g

*FDR: 2.733e-21*  
*Coefficient: 6.97e+03*  
*Value: clade20C*

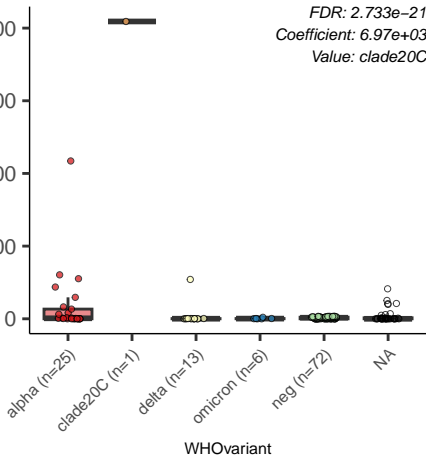

Bacteria.p\_Spirochaetes.c\_Spirochaetia.o\_Spirochaetales.f\_Bo

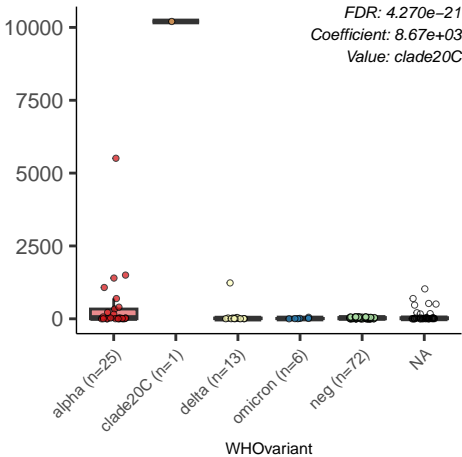

teria.p\_\_Firmicutes.c\_\_Clostridia.o\_\_Eubacteriales.f\_\_Oscillospirac

FDR:  $8.704e-21$   
Coefficient:  $-5.94e+03$   
Value: neg

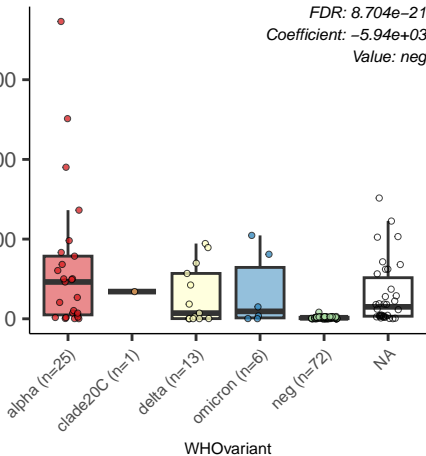

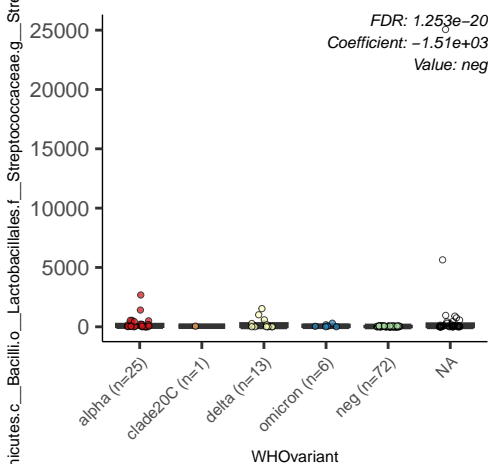

d\_Bacteria.p\_Firmicutes.c\_Clostridia.o\_Halanaero

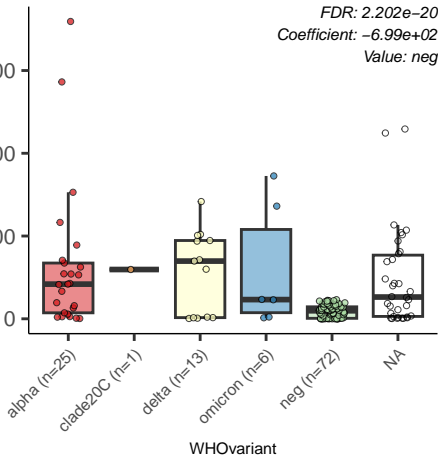

Bacteria.p\_\_Firmicutes.c\_\_Clostridia.o\_\_Eubacteriales.f\_\_Clostridia

FDR:  $3.207 \times 10^{-20}$   
Coefficient:  $-2.63 \times 10^4$   
Value<sub>neg</sub>

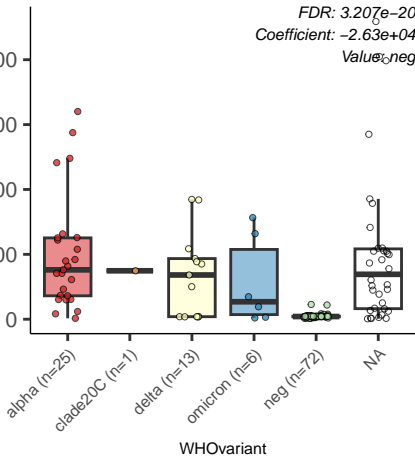

eria.p\_Firmicutes.c\_Clostridia.o\_Eubacteriales.f\_Lachnospiraceae

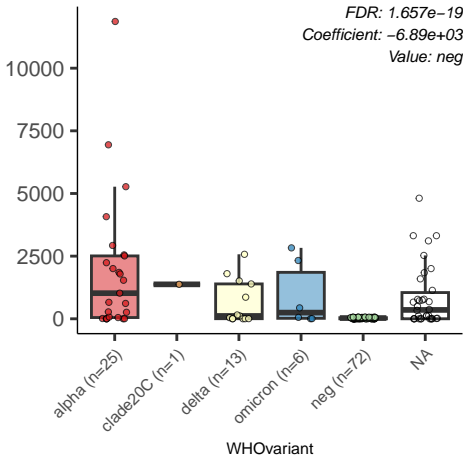

s.c.\_Clostridia.o\_Eubacteriales.f\_Lachnospiraceae.g\_Pseudobu

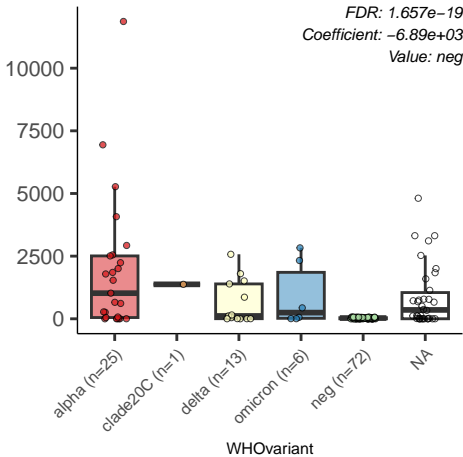



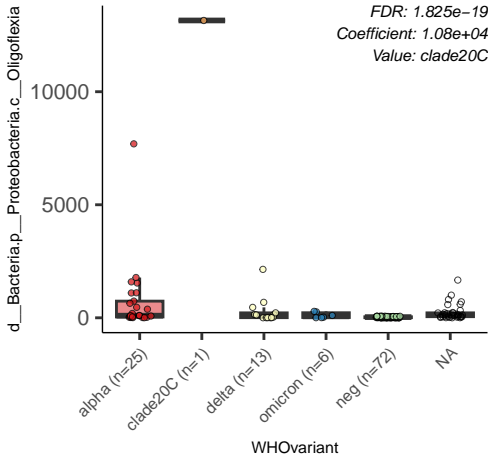

.p\_Actinobacteria.c\_Actinomycetia.o\_Actinomycetales.f\_Actino

FDR:  $2.057e-19$   
Coefficient:  $-7.37e+03$   
Value: neg

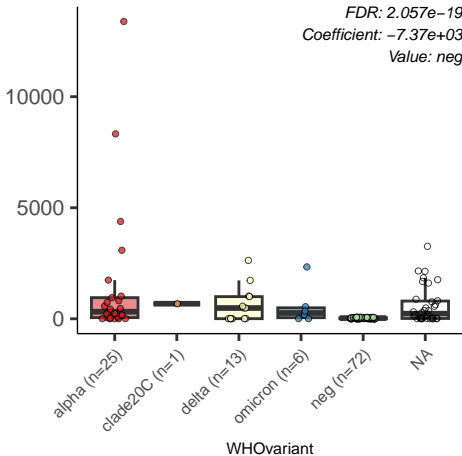

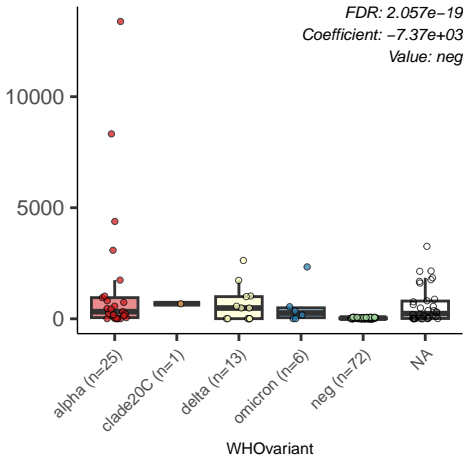

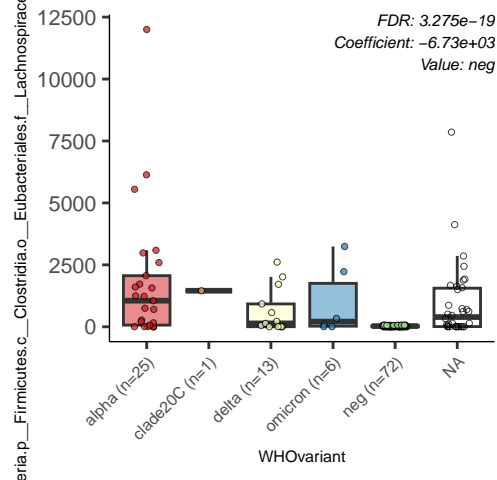

Bacteria.p\_Firmicutes.c\_Clostridia.o\_Eubacteriales.f\_Lachnosp

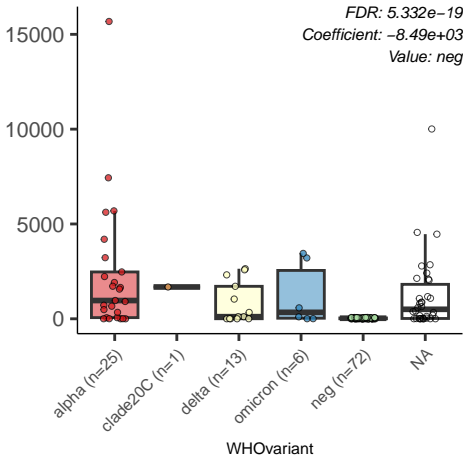

a.p\_Actinobacteria.c\_Actinomycetia.o\_Corynebacteriales.f\_No

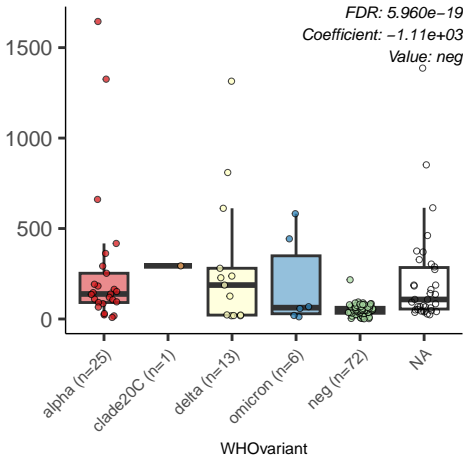

bacteria.p\_\_Proteobacteria.c\_\_Alphaproteobacteria.o\_\_Hyphomicrob

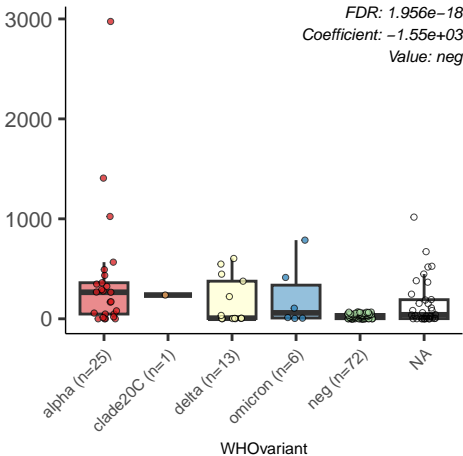

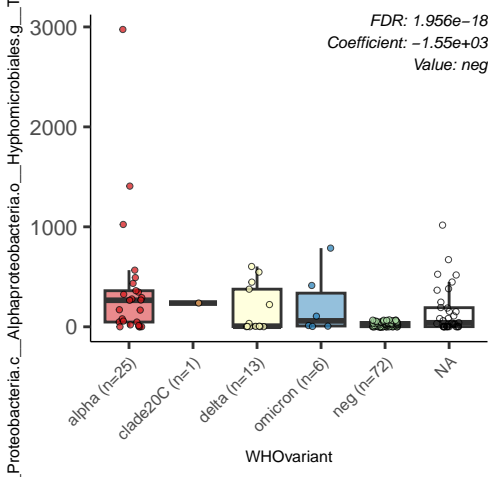



ia.p\_Firmicutes.c\_Clostridia.o\_Eubacteriales.f\_Lachnospiraceae

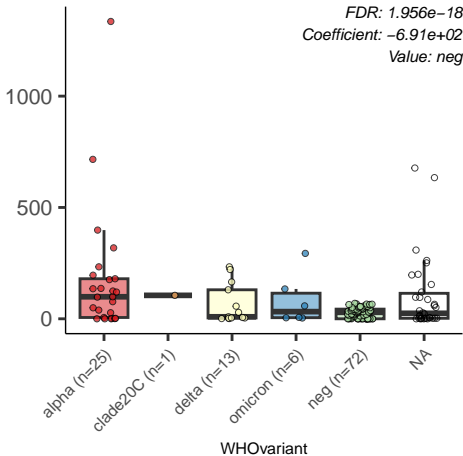

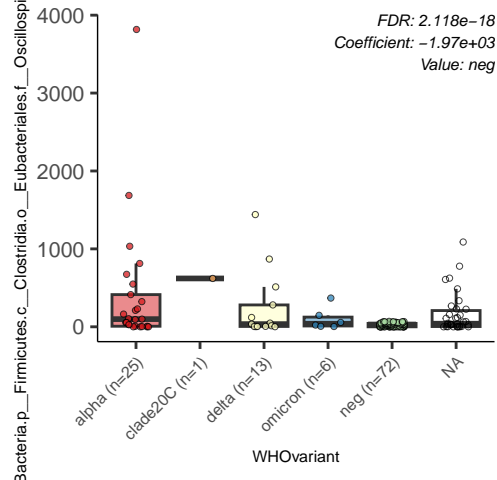

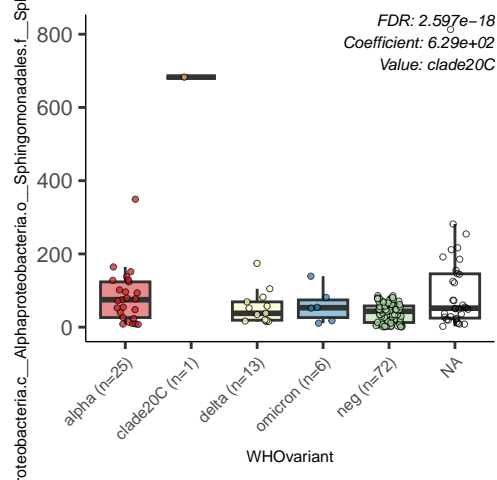

d\_Bacteria.p\_\_Spirochaetes.c\_\_Spirochaetia.o\_\_Spirochaetales

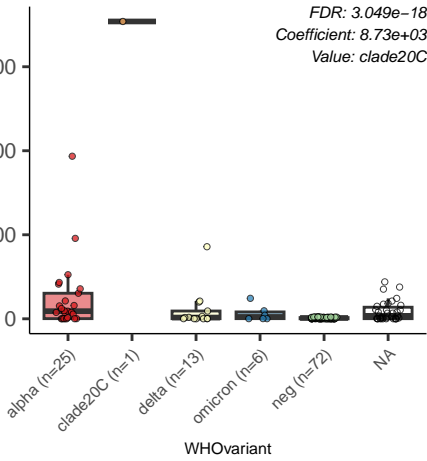

Bacteria.p\_\_Tenericutes.c\_\_Mollicutes.o\_\_Entomoplasmatales.f

FDR:  $3.049e-18$   
Coefficient:  $-8.20e+02$   
Value: neg

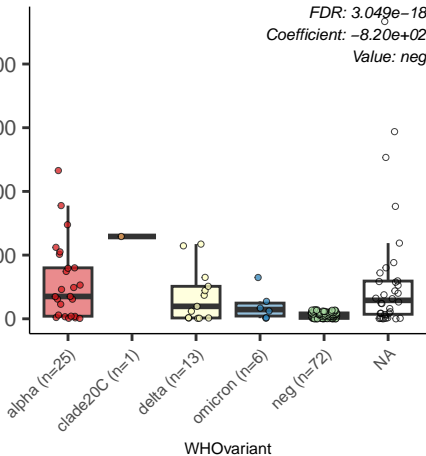

FDR:  $3.049e-18$   
Coefficient:  $-8.20e+02$   
Value: neg

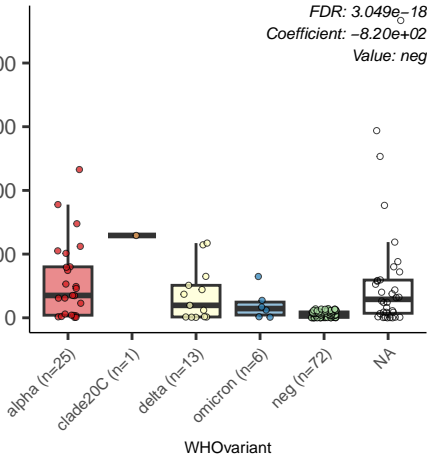

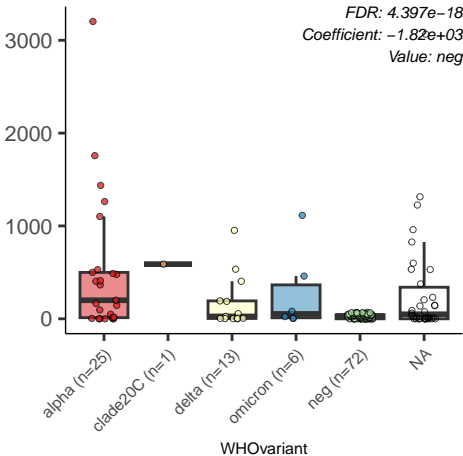

Bacteria.p\_Firmicutes.c\_Clostridia.o\_Eubacteriales.f\_Lachnosp

FDR:  $7.685e-18$   
Coefficient:  $-6.47e+03$   
Value: neg

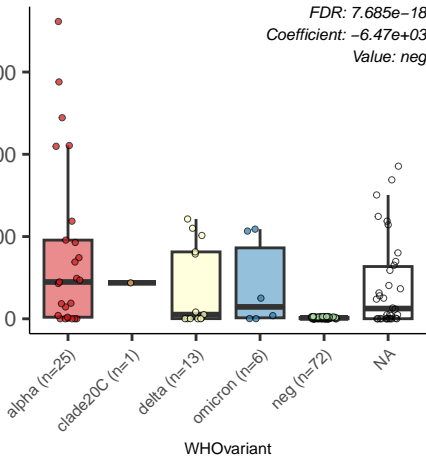



Firmicutes.c\_\_Clostridia.o\_\_Eubacteriales.f\_\_Lachnospiraceae.g\_\_

*FDR: 7.685e-18*  
*Coefficient: -6.47e+03*  
*Value: neg*

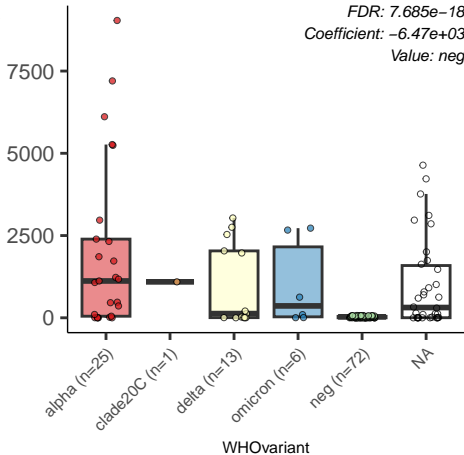

g\_\_Clostridia.o\_\_Eubacteriales.f\_\_Lachnospiraceae.g\_\_Lachnoclostridium

FDR:  $1.124e-17$   
Coefficient:  $-5.22e+03$   
Value: neg

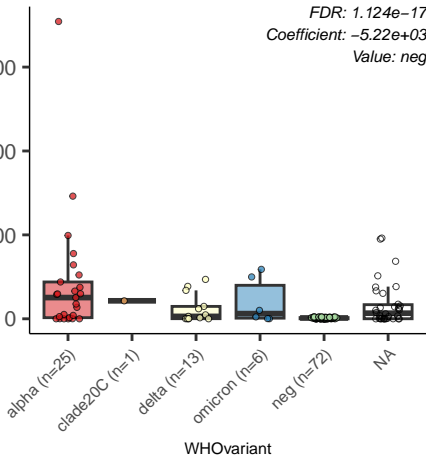

Firmicutes.c\_\_Clostridia.o\_\_Eubacteriales.f\_\_Lachnospiraceae.g

FDR:  $1.128e-17$   
Coefficient:  $-5.52e+03$   
Value: neg

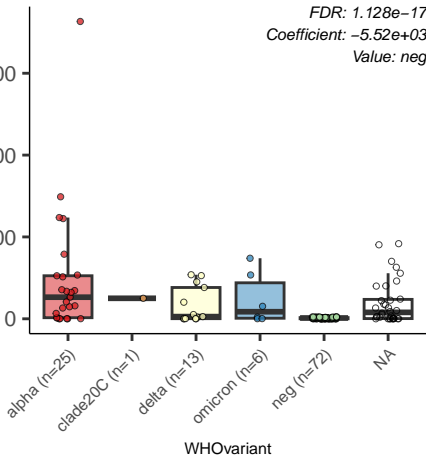

eria.p\_\_Firmicutes.c\_\_Clostridia.o\_\_Eubacteriales.f\_\_Lachnospira

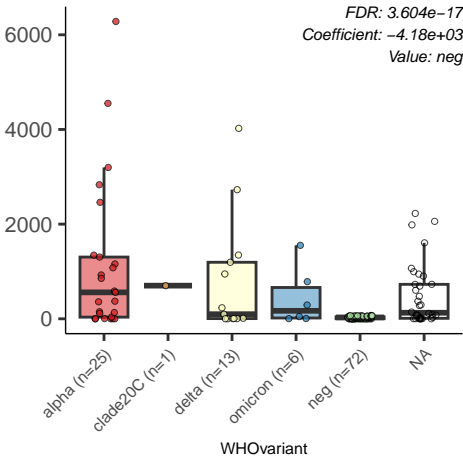

icutes.c\_\_Clostridia.o\_\_Eubacteriales.f\_\_Lachnospiraceae.g\_\_Anaer

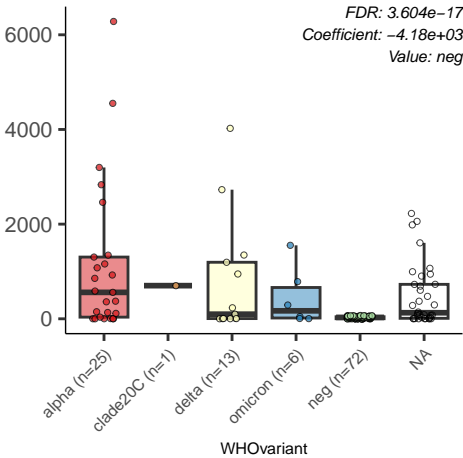

d\_\_Bacteria.p\_\_Firmicutes.c\_\_Clostridia.o\_\_Halanaerobiales.f\_\_H

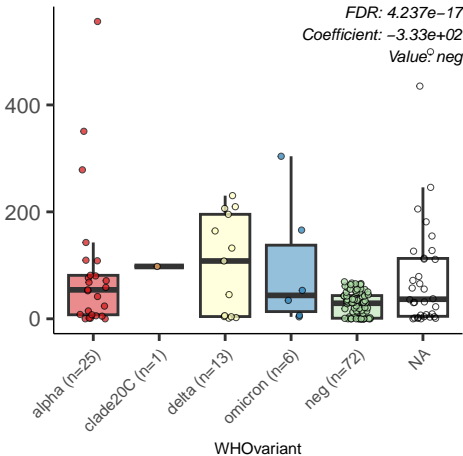

icutes.c\_\_Clostridia.o\_\_Eubacteriales.f\_\_Lachnospiraceae.g\_\_Buty

FDR:  $5.333\text{e-}17$   
Coefficient:  $-3.27\text{e}+03$   
Value: neg

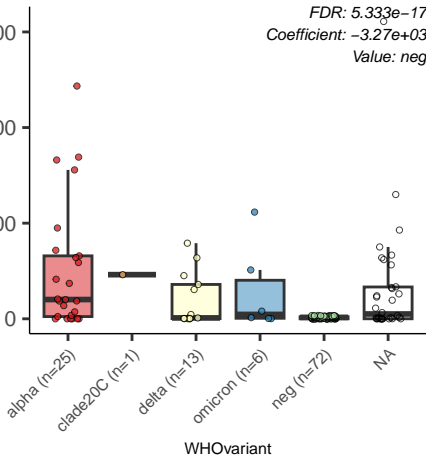

d\_Bacteria.p\_\_Candidatus.Omnitrophica

FDR:  $1.707e-16$   
Coefficient:  $6.03e+03$   
Value: clade20C

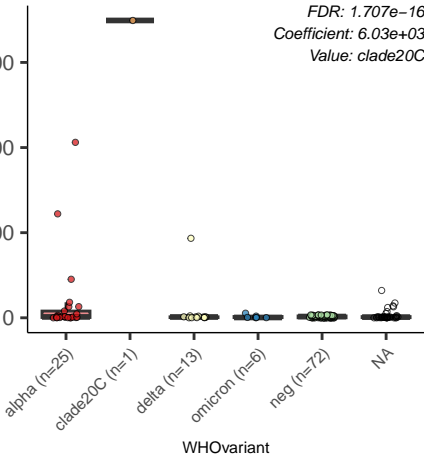



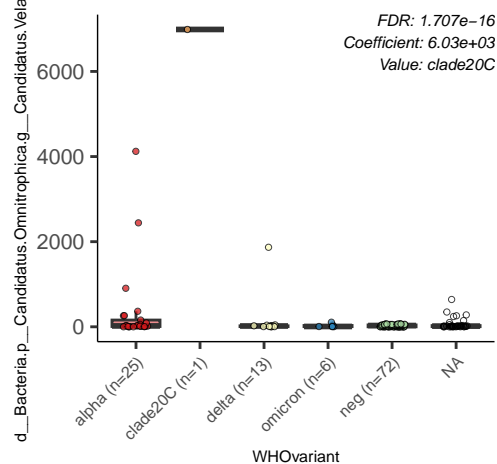

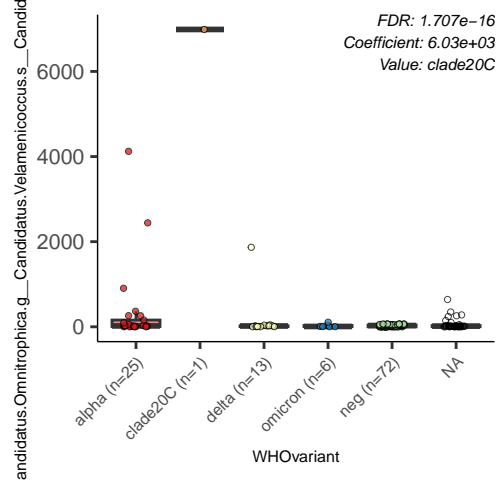

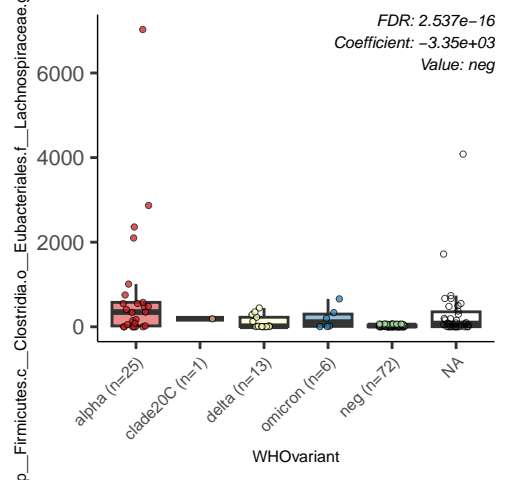

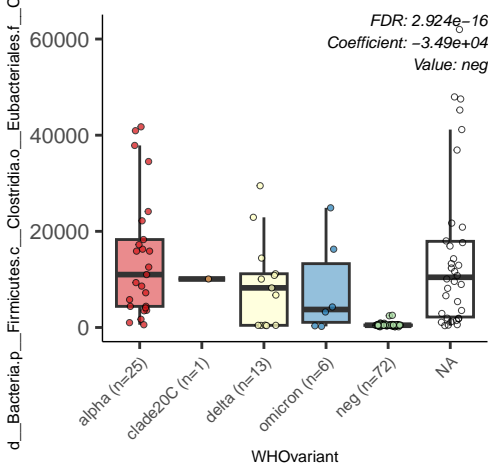

bacteria.p\_Firmicutes.c\_Clostridia.o\_Eubacteriales.f\_Lachnospir

FDR:  $2.984e-16$   
Coefficient:  $-2.19e+03$   
Value: neg

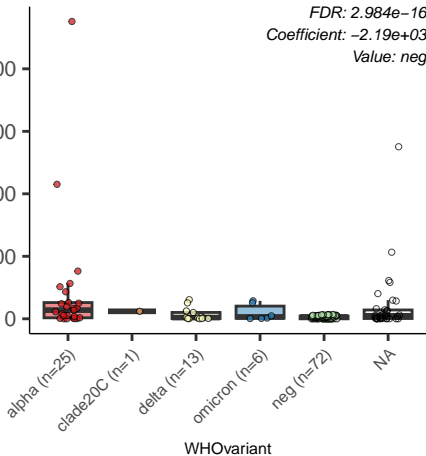

micutes.c\_\_Clostridia.o\_\_Eubacteriales.f\_\_Lachnospiraceae.g\_\_En

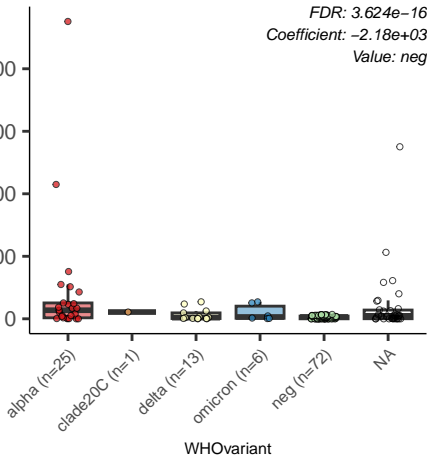

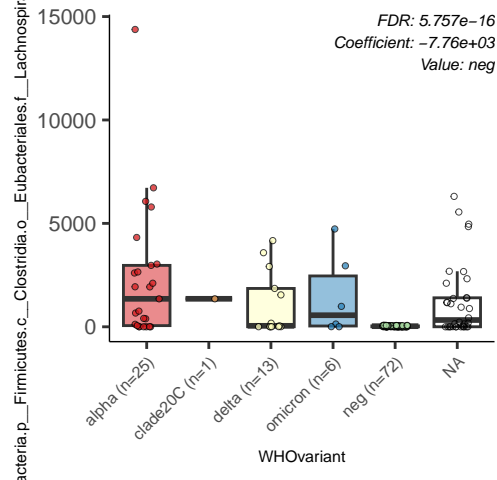

eria.p\_\_Proteobacteria.c\_\_Deltaproteobacteria.o\_\_Desulfovibrionaceae

*FDR: 9.819e-16*  
*Coefficient: -6.15e+02*  
*Value: neg*

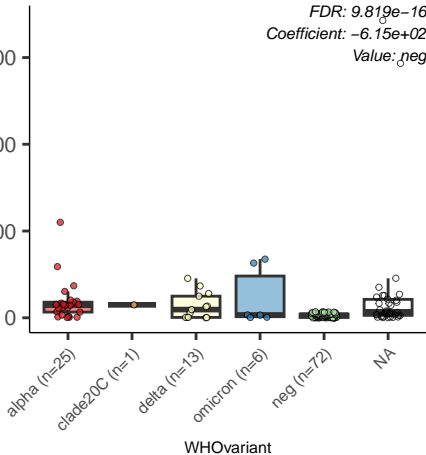



d\_Bacteria.p\_\_Proteobacteria.c\_\_Alphaproteobacte

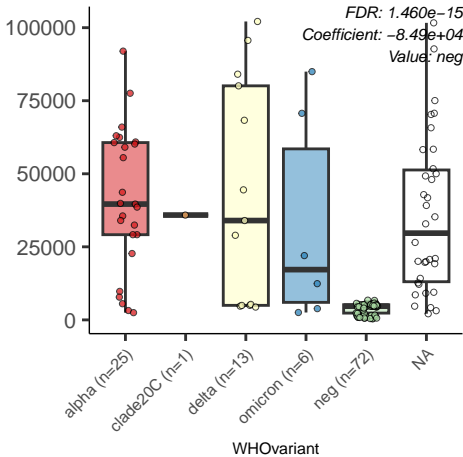

d\_Bacteria.p\_Firmicutes.c\_Clostridia.o\_Eubacteriales.f\_Des

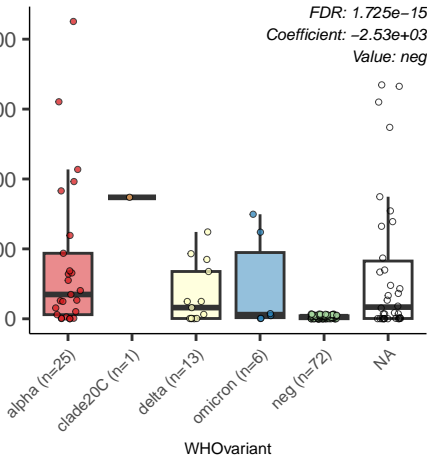

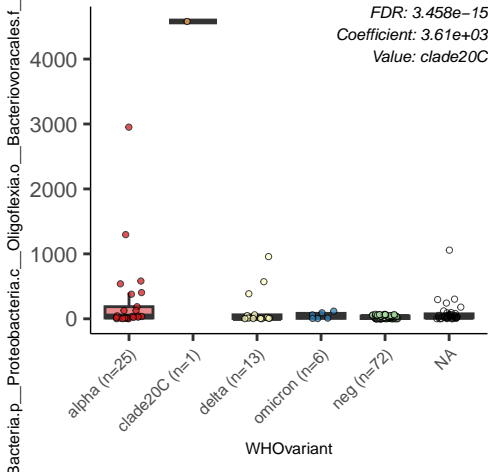

\_Proteobacteria.c\_\_Oligoflexia.o\_\_Bacteriovoracales.f\_\_Halobacter

*FDR: 3.458e-15*  
*Coefficient: 3.61e+03*  
*Value: clade20C*

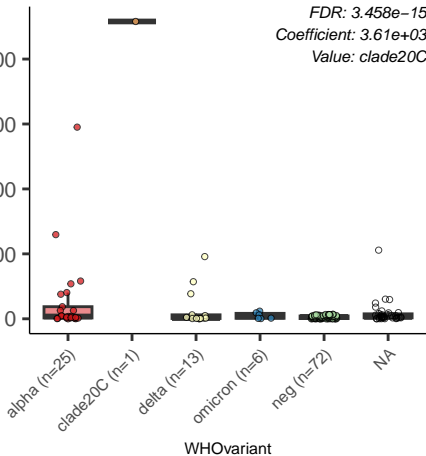

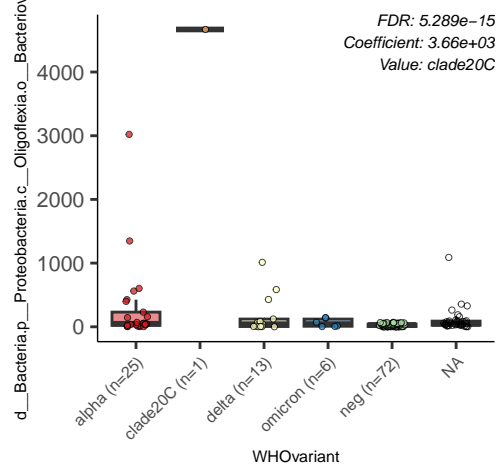

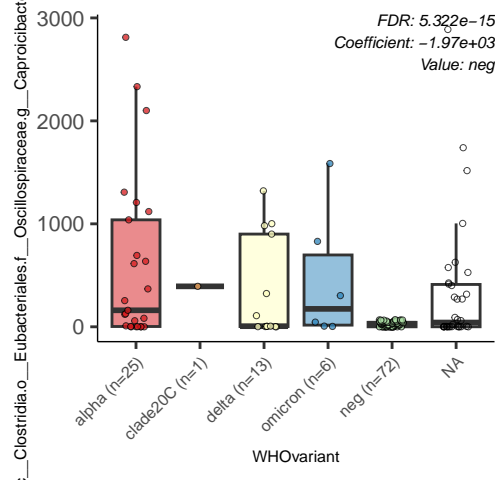

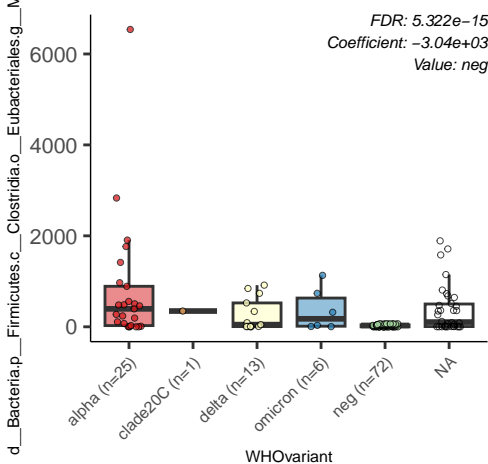

u.p\_\_Firmicutes.c\_\_Clostridia.o\_\_Eubacteriales.g\_\_Massilistercora.s

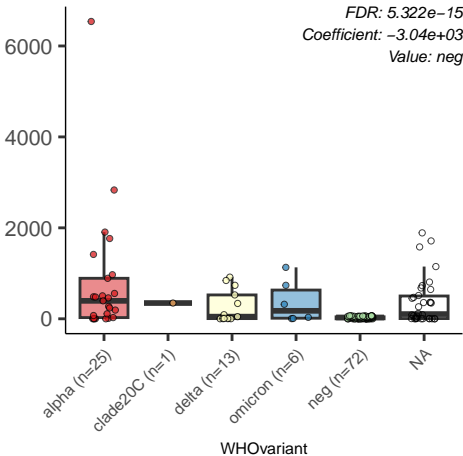



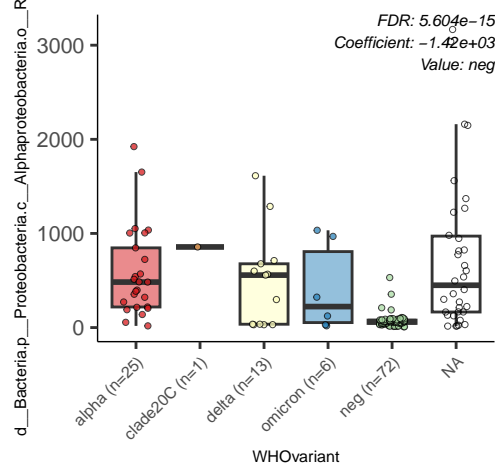

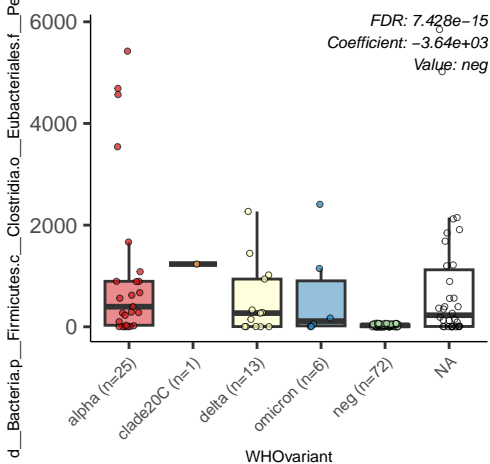

irmicutes.c\_\_Bacilli.o\_\_Lactobacillales.f\_\_Streptococcaceae.g\_\_Str

FDR:  $7.428e-15$   
Coefficient:  $-1.92e+03$   
Value: neg

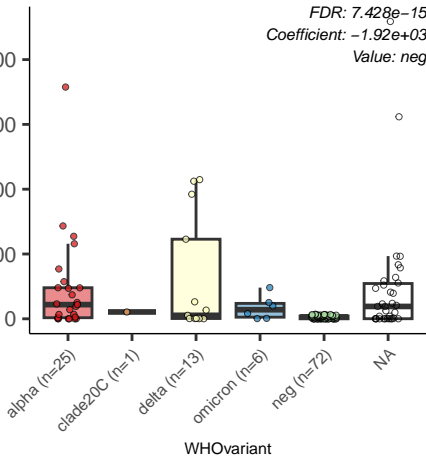

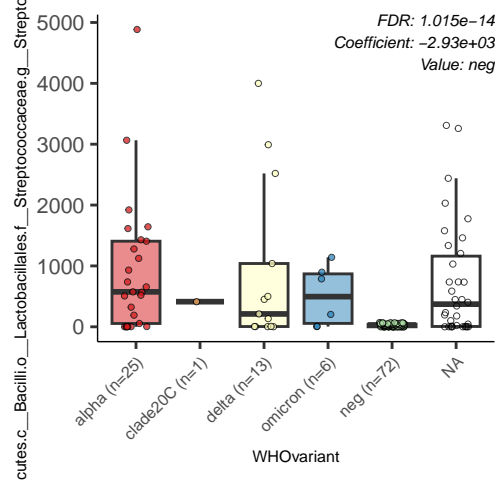

bbacteria.c\_Actinomycetia.o\_Actinomycetales.f\_Actinomycetaceae

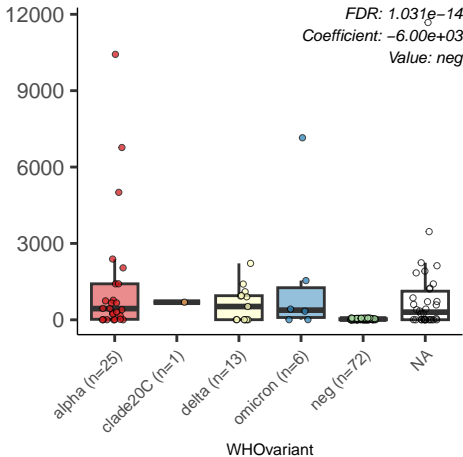

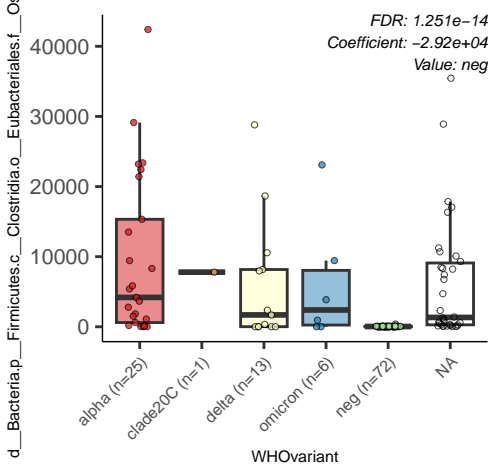

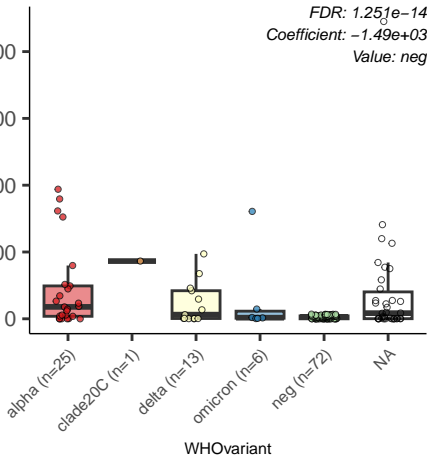

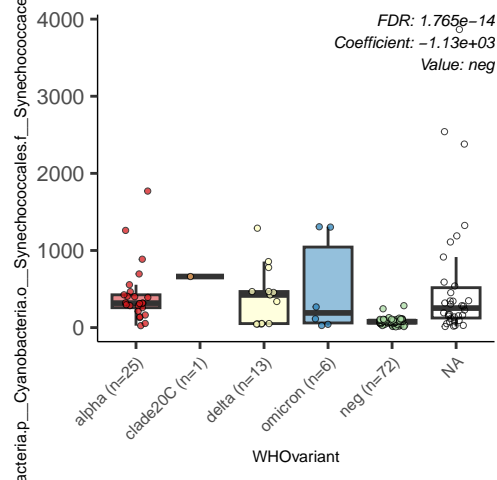



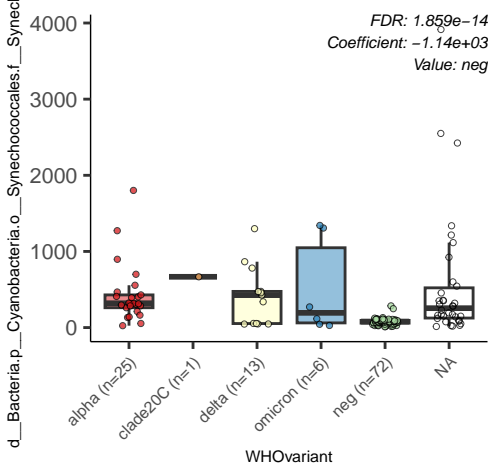

eria.p\_\_Firmicutes.c\_\_Clostridia.o\_\_Eubacteriales.f\_\_Oscillospirace

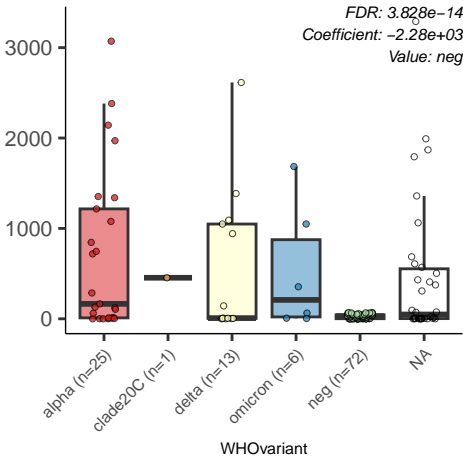

oteobacteria.c\_\_Betaproteobacteria.o\_\_Neisseriales.f\_\_Neisseriace

*FDR: 4.180e-14*  
*Coefficient: 2.89e+03*  
*Value: clade20C*

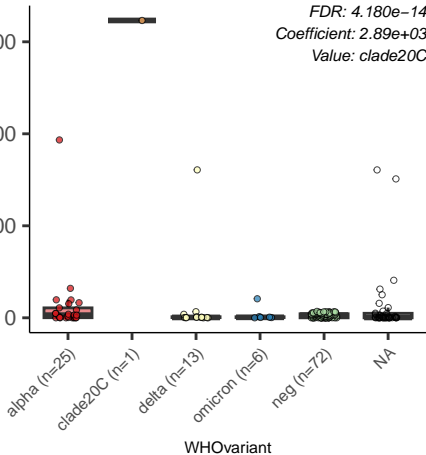

acteria.p\_Firmicutes.c\_Bacilli.o\_Lactobacillales.f\_Enterococcace

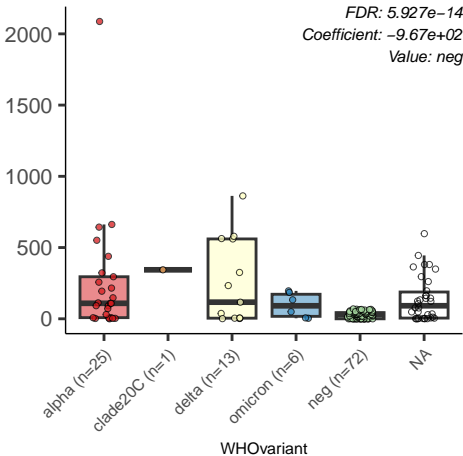

Firmicutes.c\_\_Clostridia.o\_\_Eubacteriales.f\_\_Clostridiaceae.g\_\_Clo

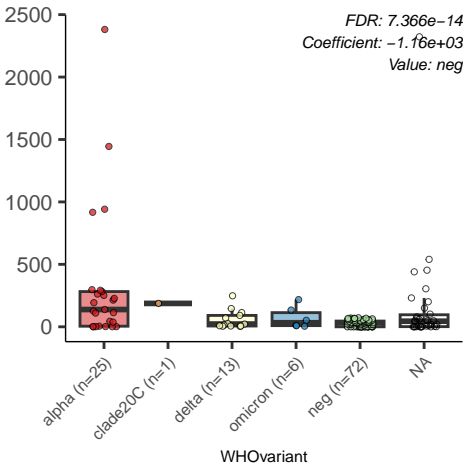

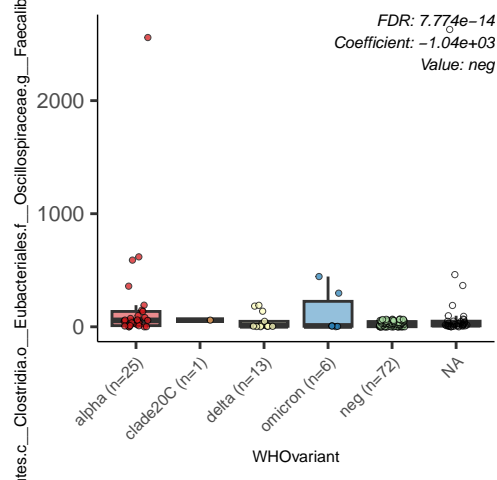

d\_Bacteria.p\_\_Acidobacteria

*FDR: 8.035e-14*  
*Coefficient: -3.38e+03*  
*Value: neg*

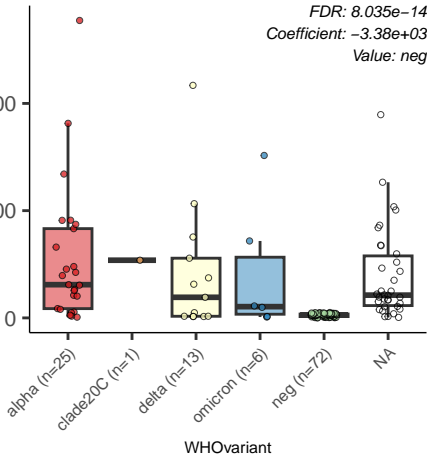

bacteria.p\_Firmicutes.c\_Clostridia.o\_Eubacteriales.f\_Lachnosp

FDR:  $1.383e-13$   
Coefficient:  $-2.48e+04$   
Value: neg

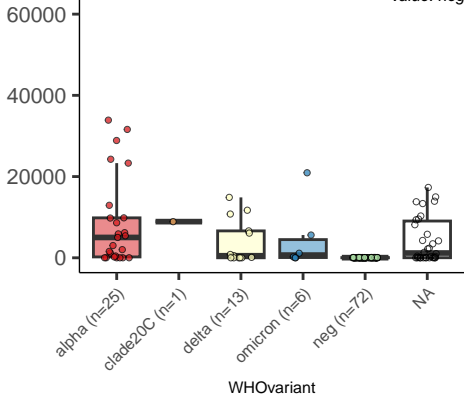



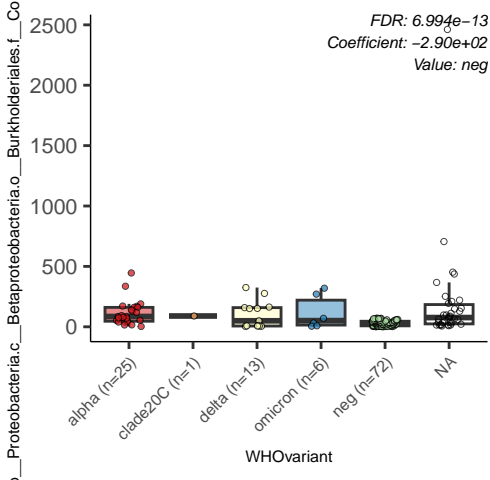

d\_\_Bacteria.p\_\_Tenericutes.c\_\_Mollicutes.o\_\_Acholeplas

FDR:  $8.313e-13$   
Coefficient:  $-1.29e+03$   
Value: neg

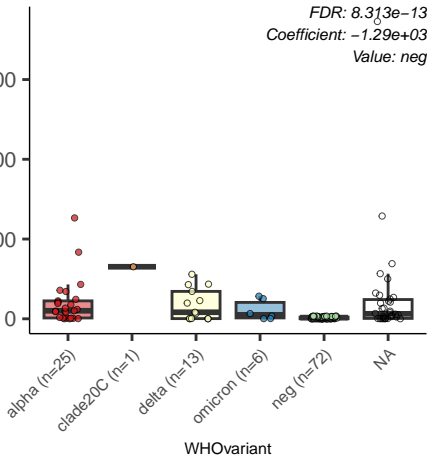

$FDR: 8.313e-13$   
 $Coefficient: -1.29e+03$   
 $Value: neg$

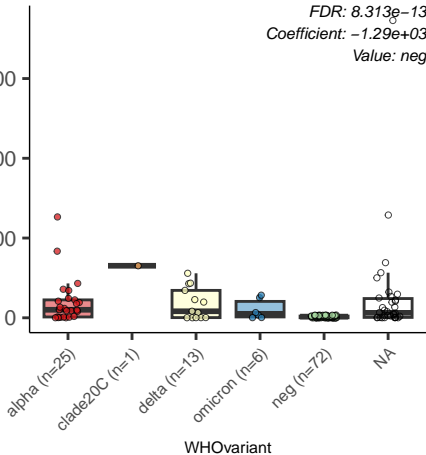

c\_\_Alphaproteobacteria.o\_\_Hyphomicrobiales.f\_\_Nitrobacteraceae.

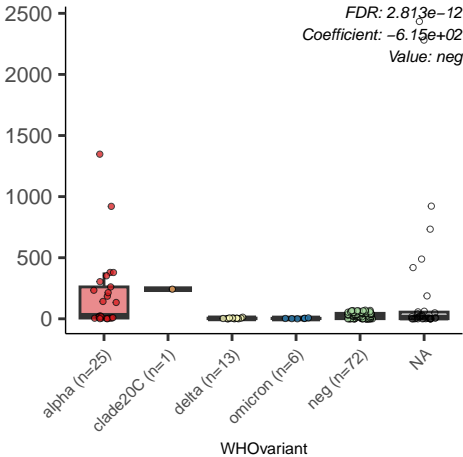

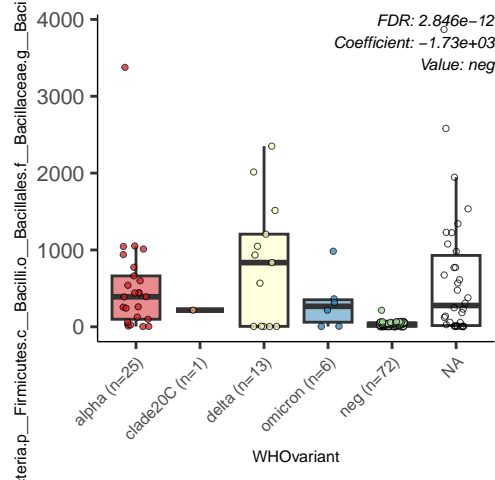

es.c\_\_Tissierellia.o\_\_Tissierellales.f\_\_Peptoniphilaceae.g\_\_Anaeroco

*FDR: 3.403e-12*  
*Coefficient: -2.27e+03*  
*Value: neg*

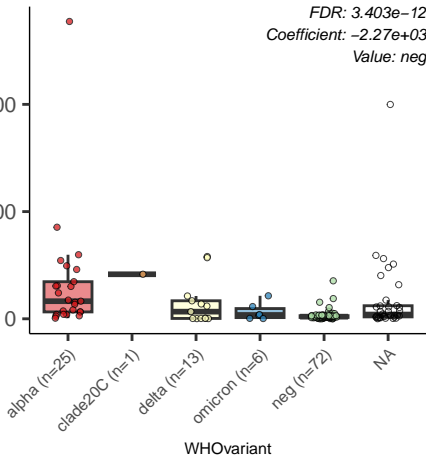

NA

FDR: 3.806e-12  
Coefficient: -2.71e+02  
Value: neg

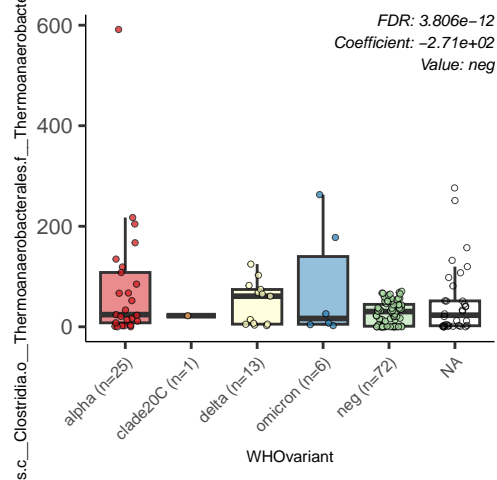



ia.o\_\_Thermoanaerobacterales.f\_\_Thermoanaerobacterales.Family

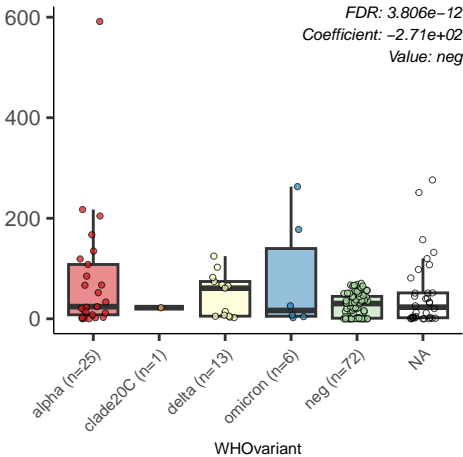

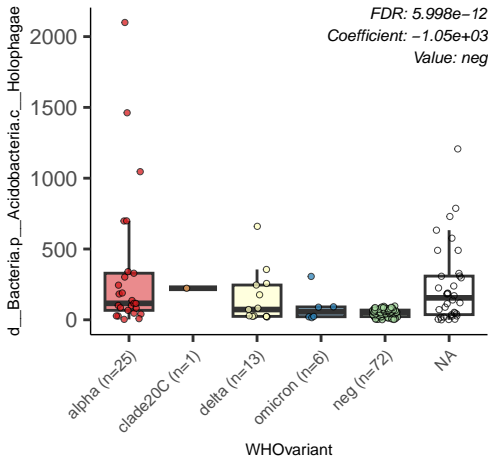

ria.p\_\_Proteobacteria.c\_\_Alphaproteobacteria.o\_\_Hyphomicrobiale

$FDR: 6.514e-12$   
 $Coefficient: -6.43e+02$   
 $Value: neg$

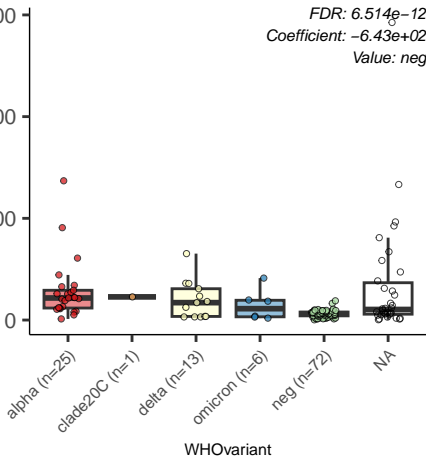

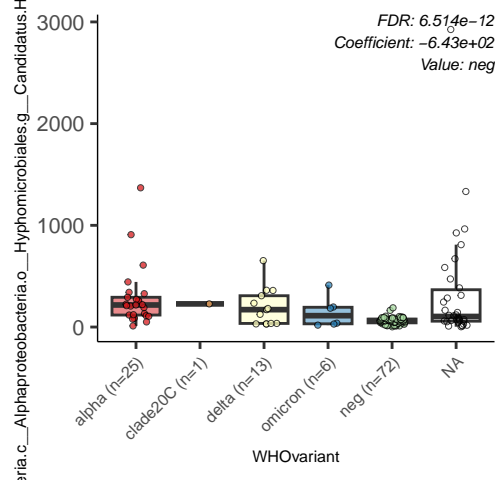

d\_Bacteria.p\_Cyanobacteria.o\_Chroococcales

FDR:  $6.785e-12$   
Coefficient:  $-4.03e+02$   
Value: neg

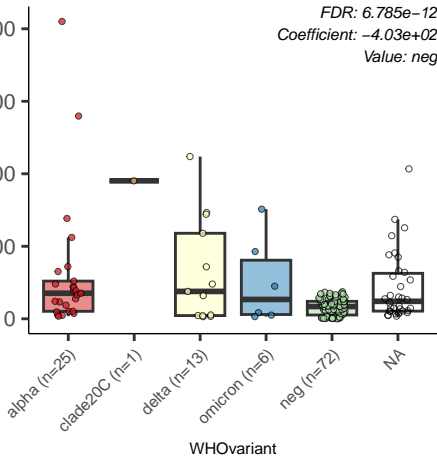

d\_\_Bacteria.p\_\_Acidobacteria.c\_\_Holophagae.o\_\_Acanthopile

FDR:  $7.441e-12$   
Coefficient:  $-1.04e+03$   
Value: neg

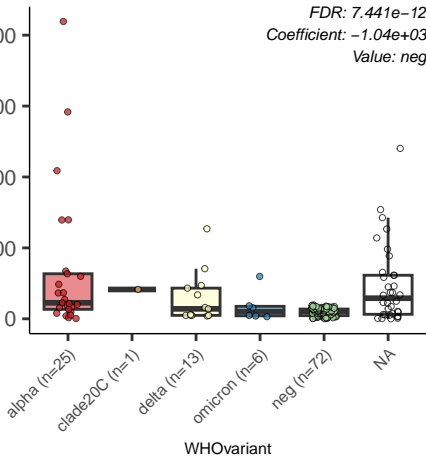

ia.p\_\_Acidobacteria.c\_\_Holophagae.o\_\_Acanthopleuribacteriales.f

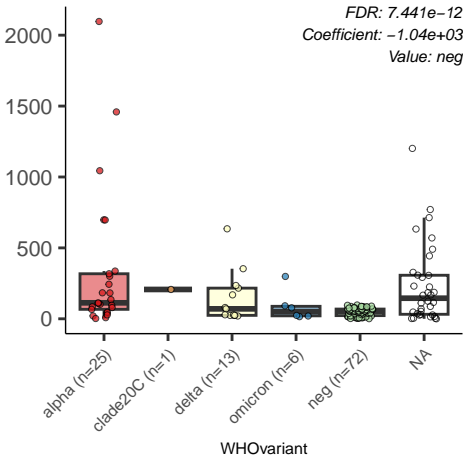

cidobacteria.c\_\_Holophagae.o\_\_Acanthopleuribacterales.f\_\_Acanth

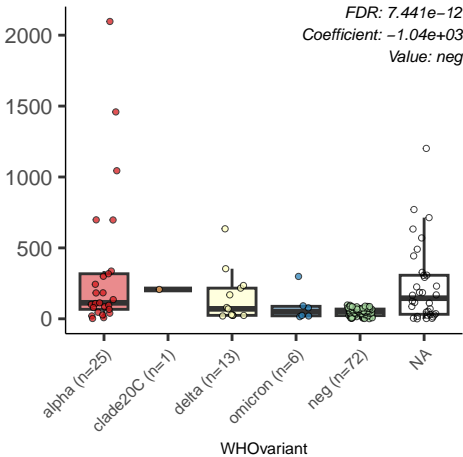



Holophagae.o\_\_Acanthopleuribacterales.f\_\_Acanthopleuribacter

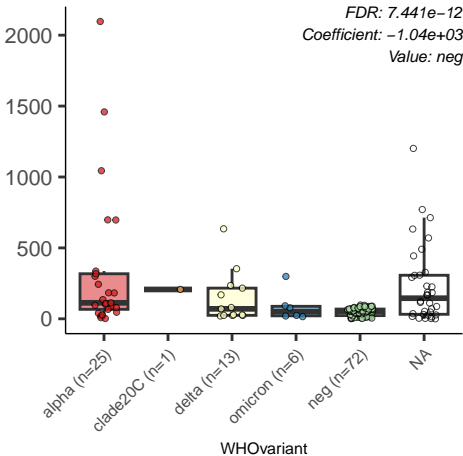

.p\_Actinobacteria.c\_Actinomycetia.o\_Actinomycetales.f\_Actino

FDR:  $7.441e-12$   
Coefficient:  $-6.10e+03$   
Value: omicron

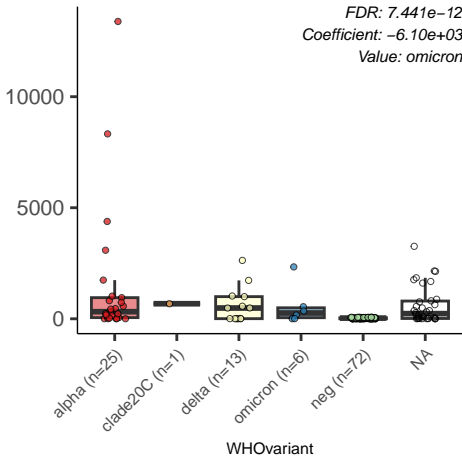

FDR:  $7.441e-12$   
Coefficient:  $-6.10e+03$   
Value: omicron

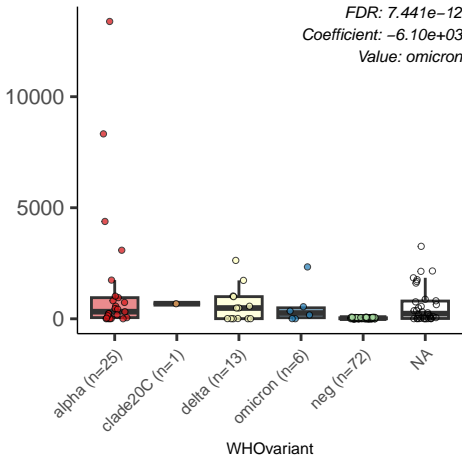

Bacteria.p\_\_Firmicutes.c\_\_Clostridia.o\_\_Eubacteriales.f\_\_Lachnos

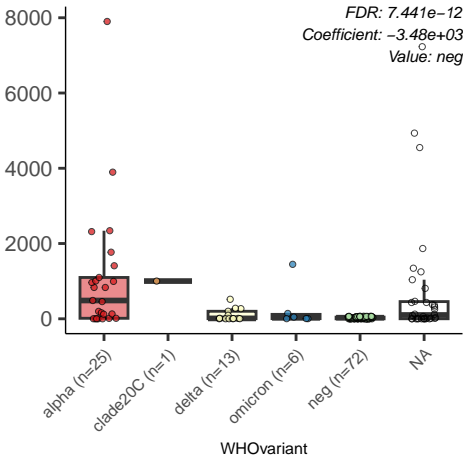

p\_Firmicutes.c\_\_Clostridia.o\_\_Eubacteriales.f\_\_Lachnospiraceae

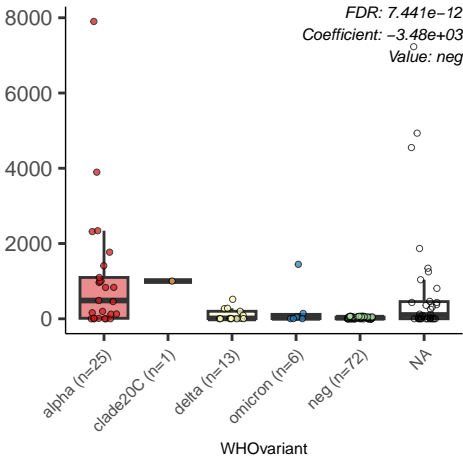

p\_Actinobacteria.c\_Actinomycetia.o\_Micrococcales.f\_Micrococ

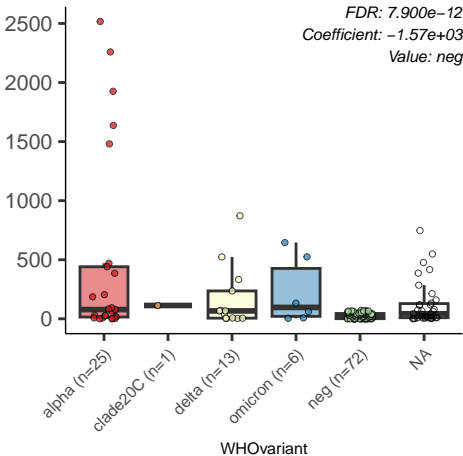

d\_\_Bacteria.p\_\_Proteobacteria.c\_\_Gammaproteobacteria.o\_\_O

FDR:  $8.622e-12$   
Coefficient:  $-2.97e+04$   
Value: neg

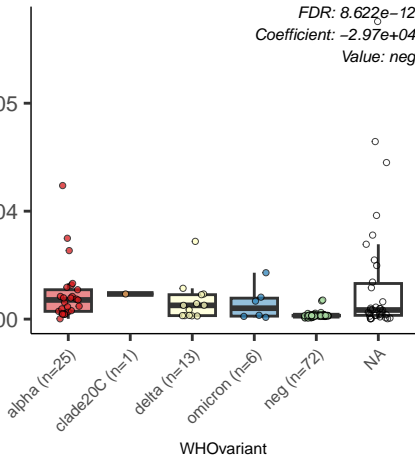

Proteobacteria.c\_\_Gammaproteobacteria.o\_\_Oceanospirillales.f

FDR:  $8.677e-12$   
Coefficient:  $-2.91e+04$   
Value: neg

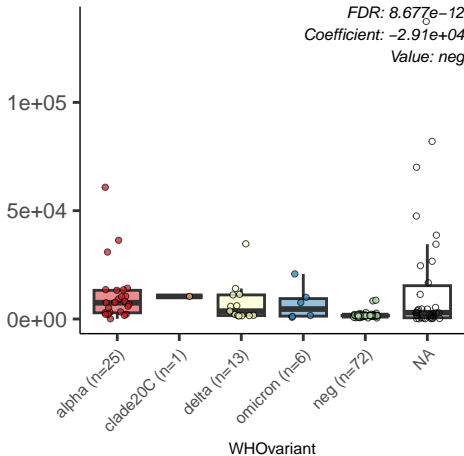



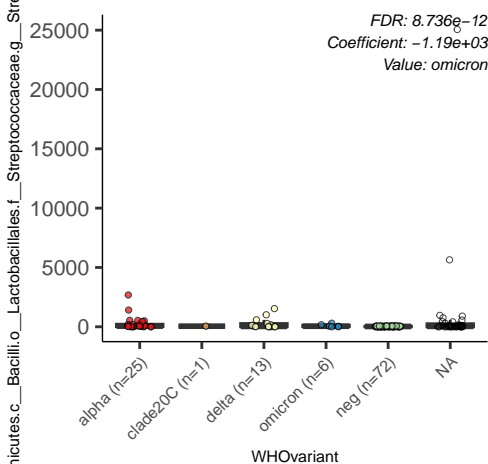

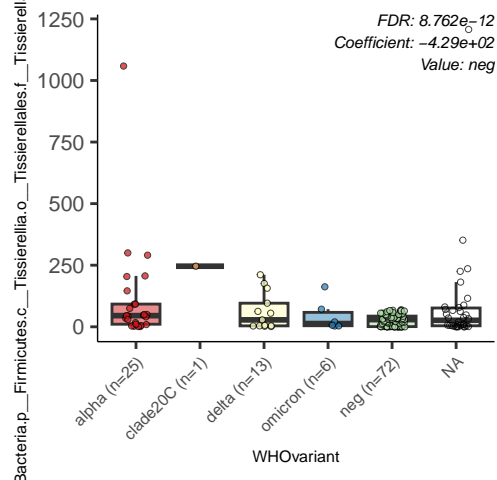

Firmicutes.c\_\_Tissierellia.o\_\_Tissierellales.f\_\_Tissierellaceae.g\_\_G

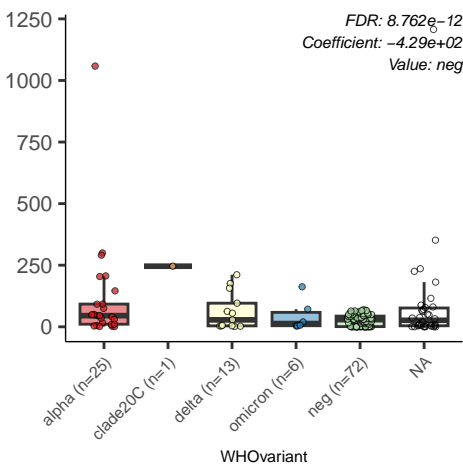

terial.p\_\_Proteobacteria.c\_\_Gammaproteobacteria.o\_\_Oceanospirill

FDR:  $9.047e-12$   
Coefficient:  $-2.93e+04$   
Value: neg

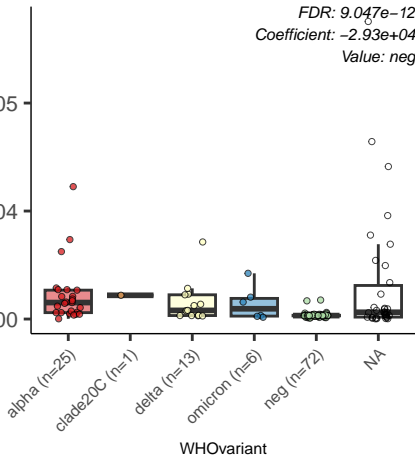

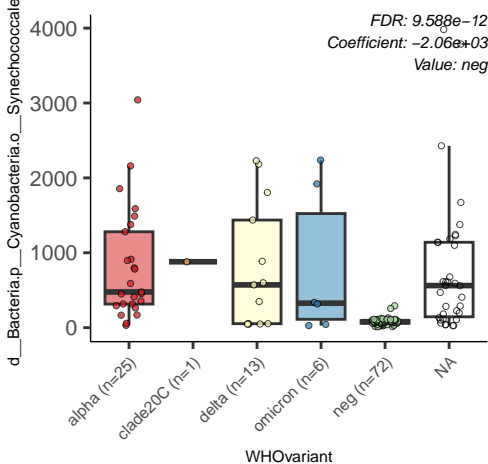

c\_\_Gammaproteobacteria.o\_\_Oceanospirillales.f\_\_Halomonadaceae

FDR:  $9.856e-12$   
Coefficient:  $-2.90e+04$   
Value: neg

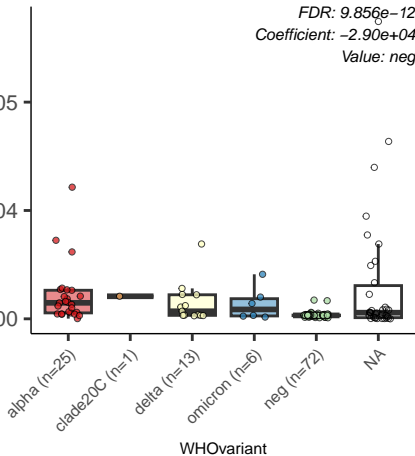

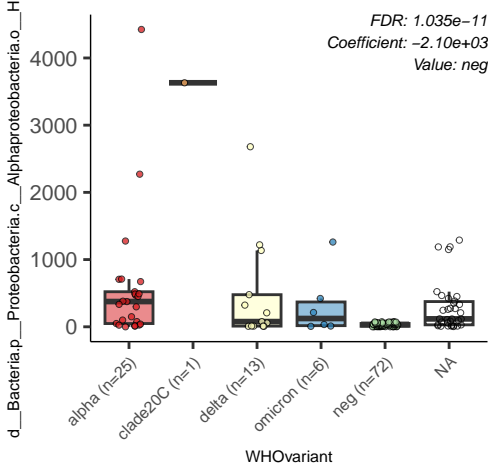

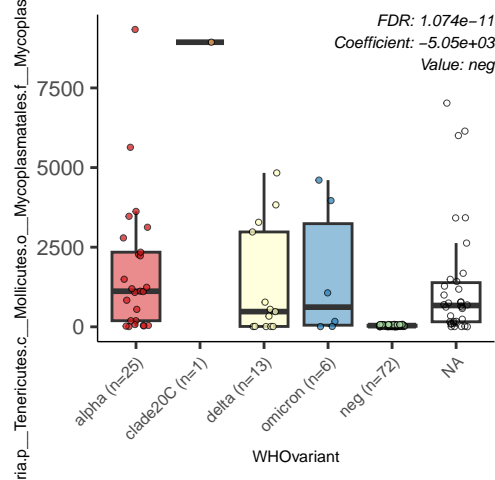



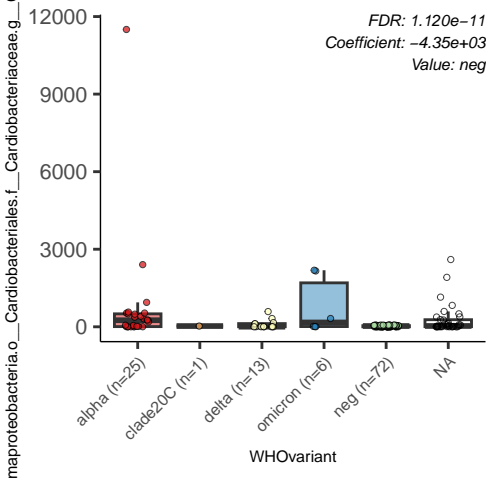

d\_\_Bacteria.p\_\_Firmicutes.c\_\_Tissierellia

FDR:  $1.192 \times 10^{-11}$   
Coefficient:  $-3.69 \times 10^4$   
Value: neg

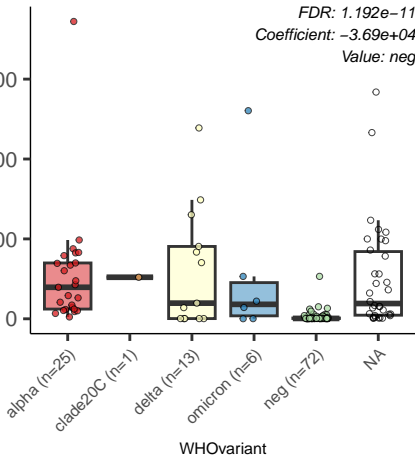

Bacteria.p\_\_Proteobacteria.c\_\_Alphaproteobacteria.o\_\_Holosporal

FDR:  $1.560e-11$   
Coefficient:  $-2.08e+03$   
Value: neg

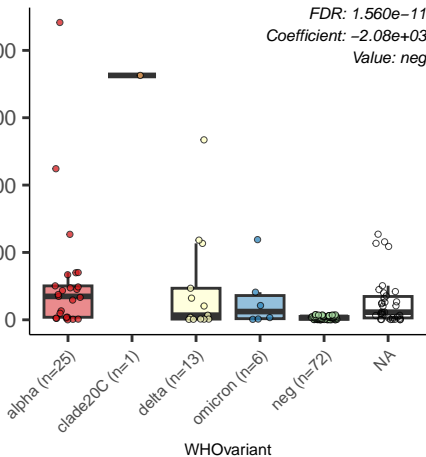

d\_Bacteria.p\_Actinobacteria.c\_Actinomycetia.o\_Streptos

FDR:  $1.575e-11$   
Coefficient:  $-2.75e+03$   
Value: neg

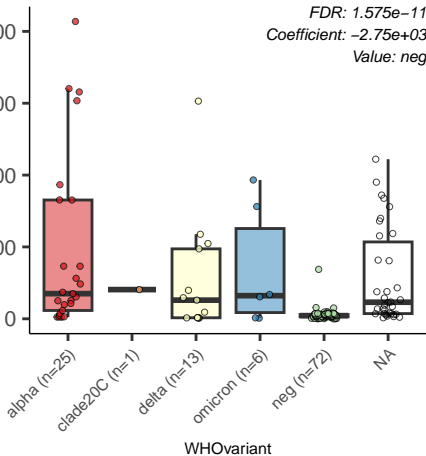

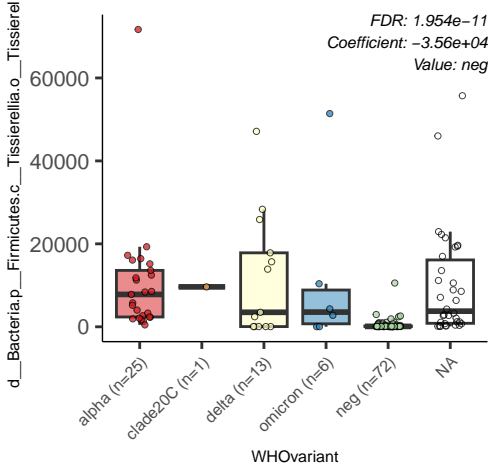

d\_\_Bacteria.p\_\_Proteobacteria.c\_\_Alphaproteobacteria.o\_\_Sphingomonadiales

75000  
50000  
25000  
0

alpha (n=25)

clade20C (n=1)

delta (n=13)

omicron (n=6)

neg (n=72)

NA

WHOvariant

FDR:  $2.198 \times 10^{-11}$   
Coefficient:  $-5.29 \times 10^4$   
Value: neg

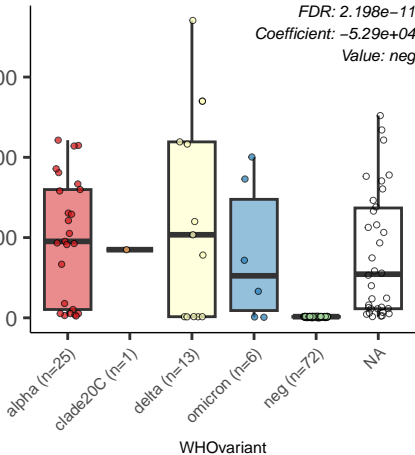

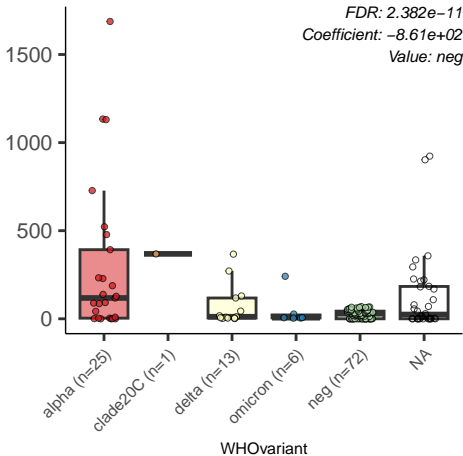

cteria.c\_\_Acidobacteriia.o\_\_Acidobacteriales.f\_\_Acidobacteriaceae.

FDR:  $2.672e-11$   
Coefficient:  $-1.66e+03$   
Value: neg

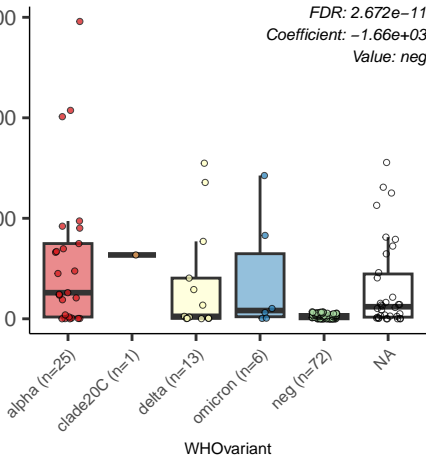



Proteobacteria.c\_\_Alphaproteobacteria.o\_\_Hyphomicrobiales.f\_\_Nit

*FDR:  $2.876e-11$*   
*Coefficient:  $-3.69e+03$*   
*Value: neg*

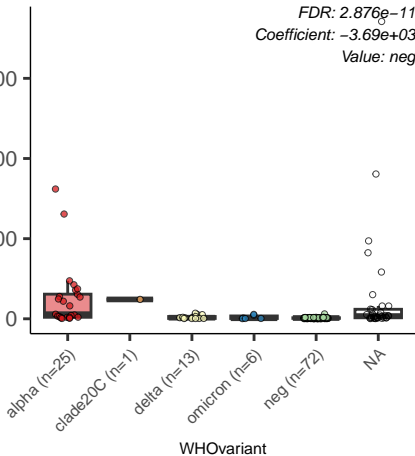

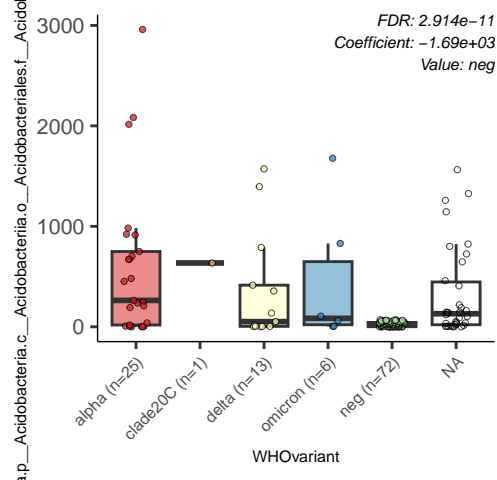

d\_\_Bacteria.p\_\_Planctomycetes

FDR: 2.914e-11  
Coefficient: -9.82e+03  
Value: neg

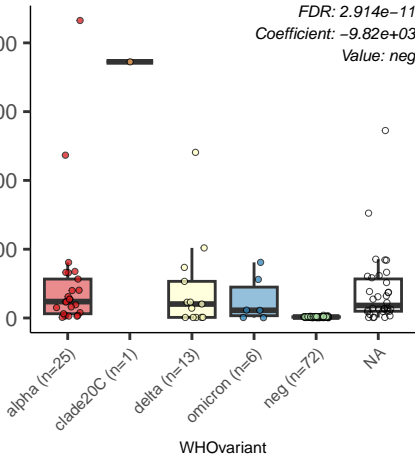

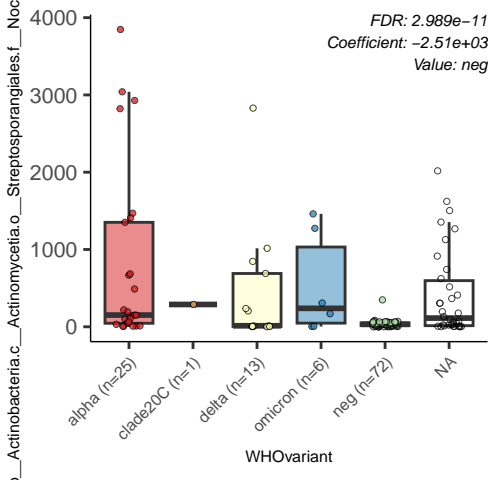

.p\_Actinobacteria.c\_Actinomycetia.o\_Actinomycetales.f\_Actino

*FDR: 2.989e-11*  
*Coefficient: -4.93e+03*  
*Value: delta*

10000

5000

0

alpha (n=25)

clade20C (n=1)

delta (n=13)

omicron (n=6)

neg (n=72)

NA

WHOvariant

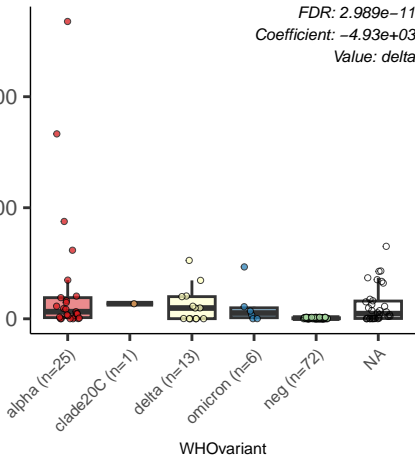

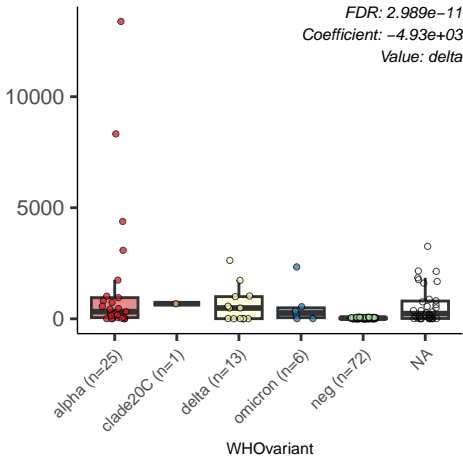

bacteria.p\_Actinobacteria.c\_Actinomyetia.o\_Streptosporangiale

FDR:  $3.215e-11$   
Coefficient:  $-2.60e+03$   
Value: neg

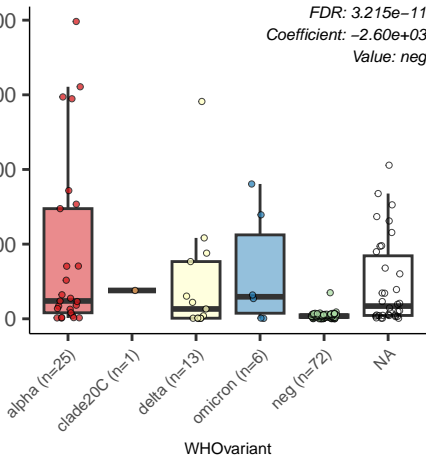

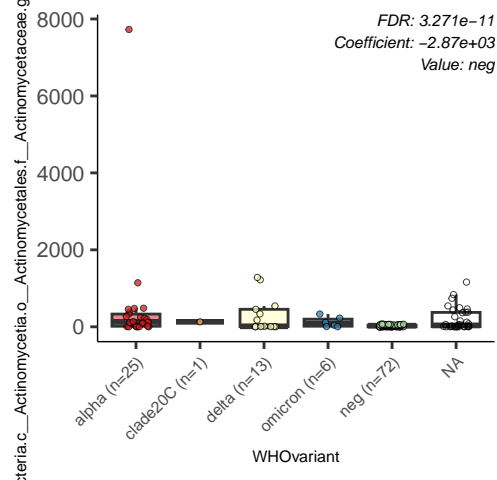



teria.p\_\_Firmicutes.c\_\_Clostridia.o\_\_Eubacteriales.f\_\_Oscillospirac

FDR:  $3.409e-11$   
Coefficient:  $-3.75e+03$   
Value: delta

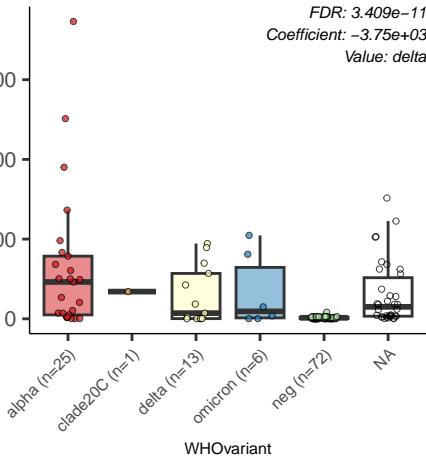

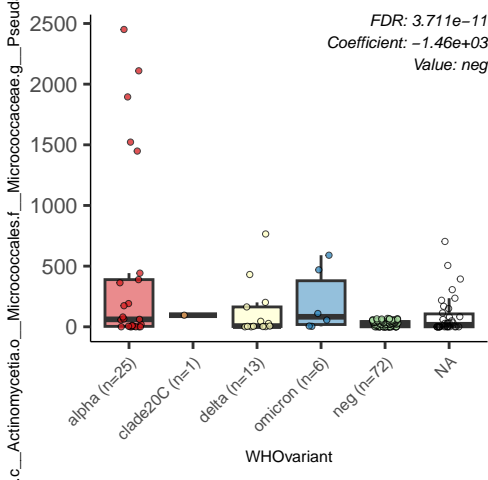

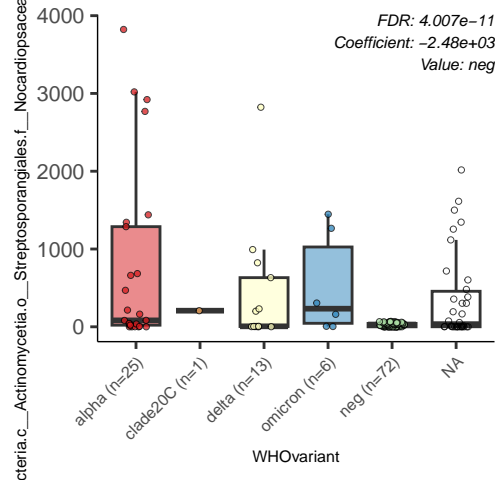

d\_Bacteria.p\_\_Verrucomicrobia.c\_\_Verrucomicrobia

FDR:  $4.202e-11$   
Coefficient:  $-1.32e+03$   
Value: neg

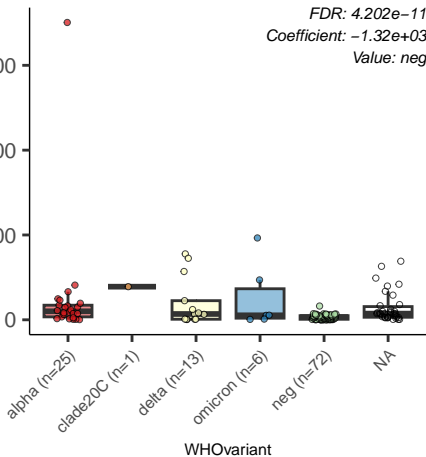

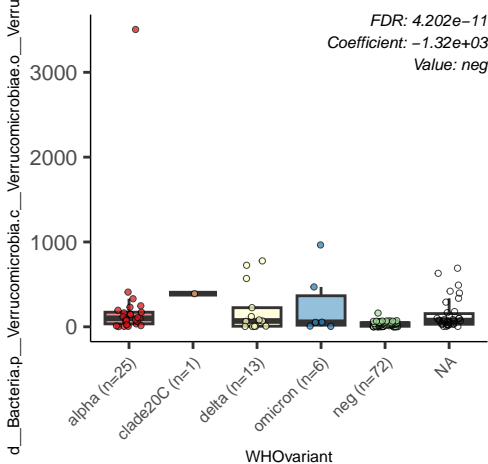

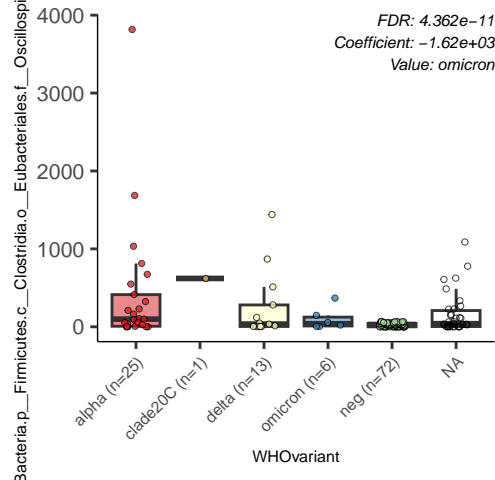

teria.p\_\_Firmicutes.c\_\_Clostridia.o\_\_Eubacteriales.f\_\_Oscillospirac

FDR:  $4.789e-11$   
Coefficient:  $-4.42e+03$   
Value: omicron

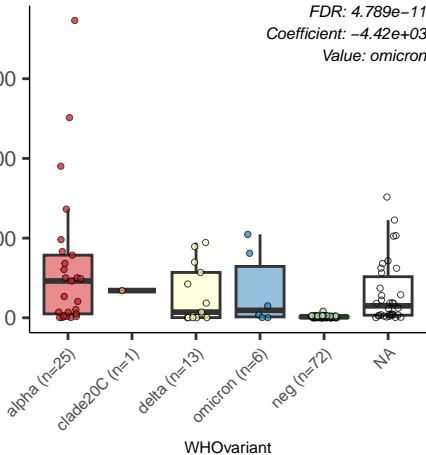

acteria.p\_\_Proteobacteria.c\_\_Alphaproteobacteria.o\_\_Hyphomicrobia

FDR:  $4.804 \times 10^{-11}$   
Coefficient:  $-8.02 \times 10^3$   
Value: neg

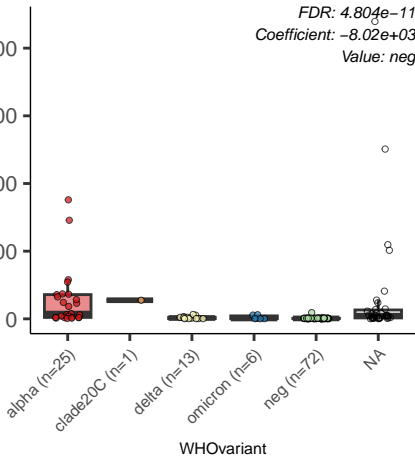



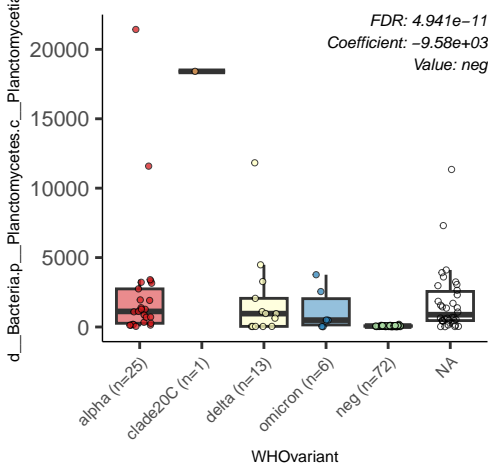

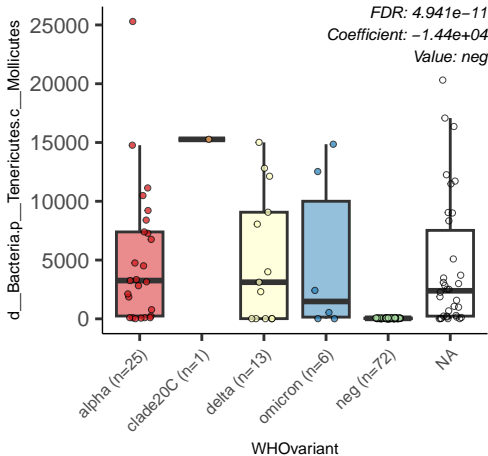

d\_\_Bacteria.p\_\_Firmicutes.c\_\_Tissierellia.o\_\_Tissierellales.f\_\_Pe

FDR:  $5.546e-11$   
Coefficient:  $-3.24e+04$   
Value: neg

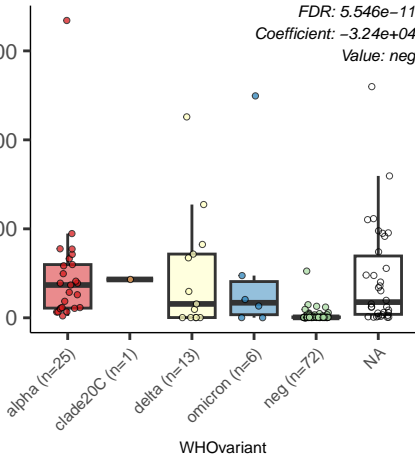

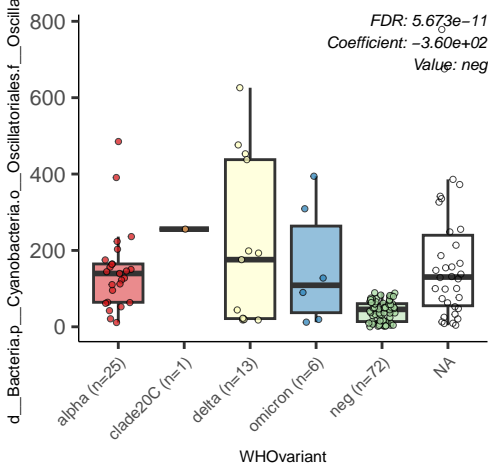

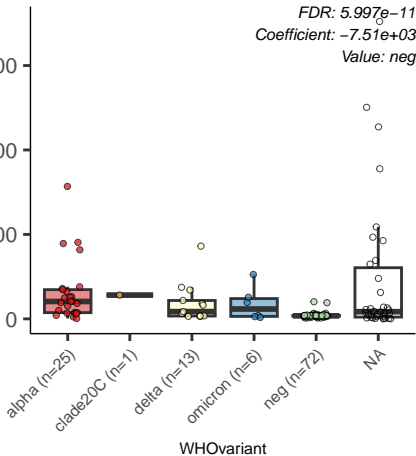

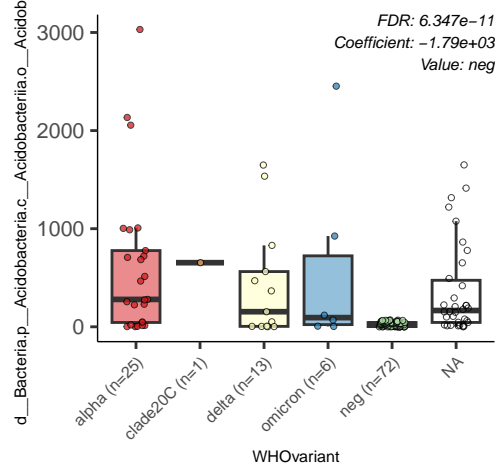

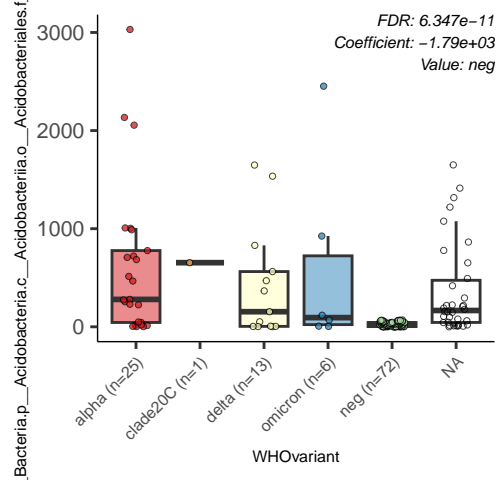

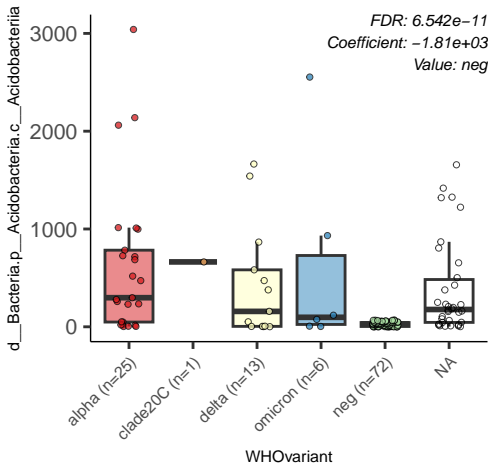



ia.p\_Firmicutes.c\_Clostridia.o\_Eubacteriales.f\_Lachnospiraceae

FDR:  $8.354e-11$   
Coefficient:  $-5.58e+02$   
Value: omicron

1000

500

0

alpha (n=25)

clade20C (n=1)

delta (n=13)

omicron (n=6)

neg (n=72)

NA

WHOvariant

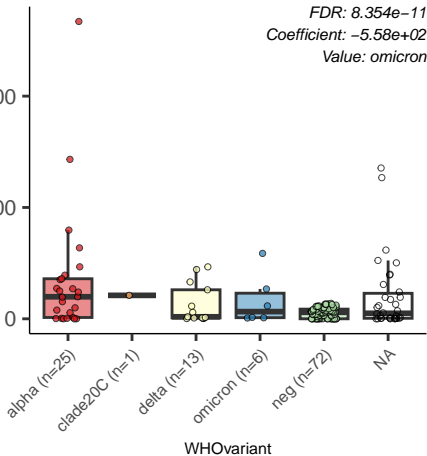

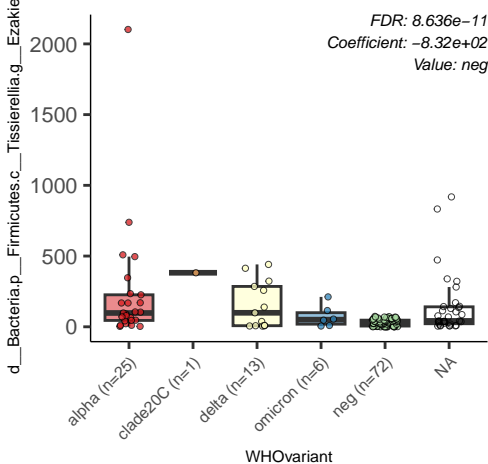

Proteobacteria.c\_\_Betaproteobacteria.o\_\_Burkholderiales.f\_\_Com

FDR:  $8.741e-11$   
Coefficient:  $-3.74e+03$   
Value: neg

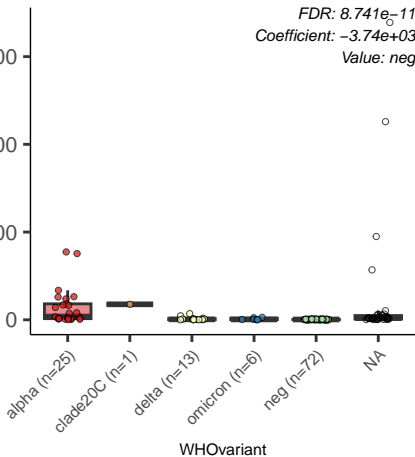

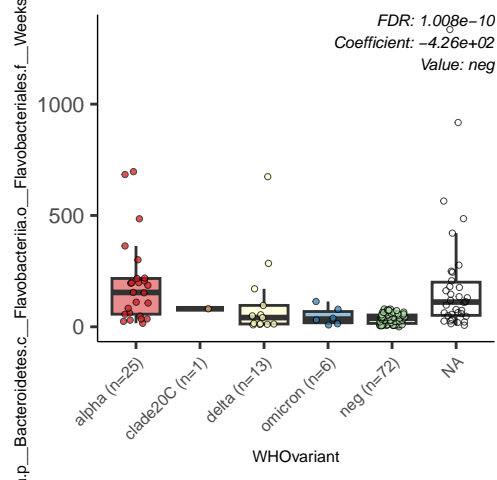

d\_Bacteria.p\_\_Proteobacteria.c\_\_Alphaproteobacteria.o\_\_Hyp

FDR:  $1.019e-10$   
Coefficient:  $-1.70e+04$   
Value: neg

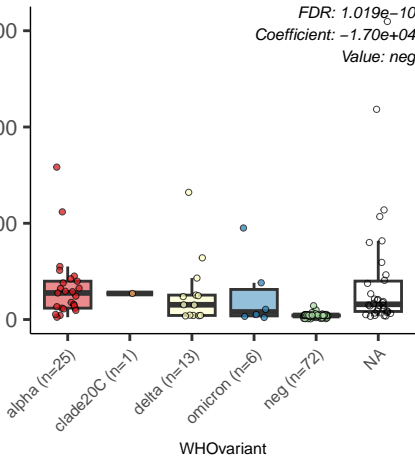

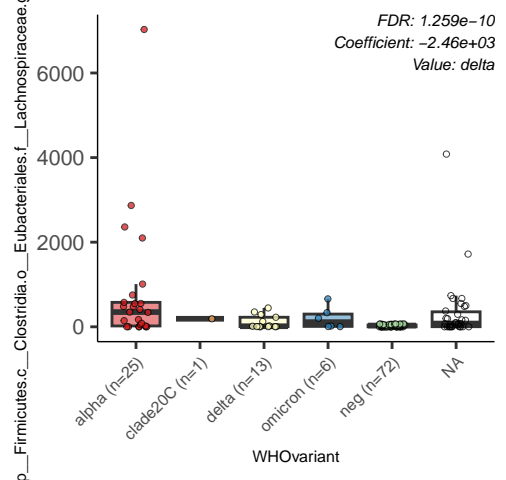

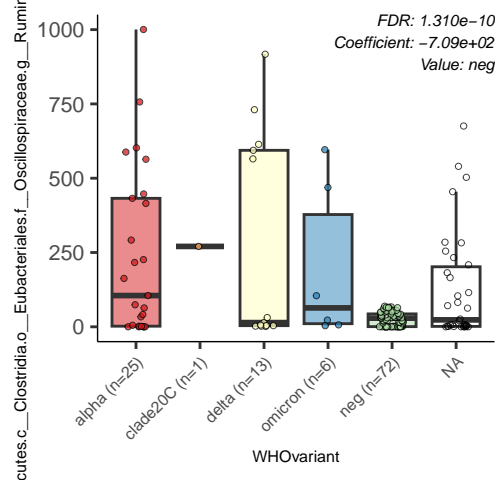

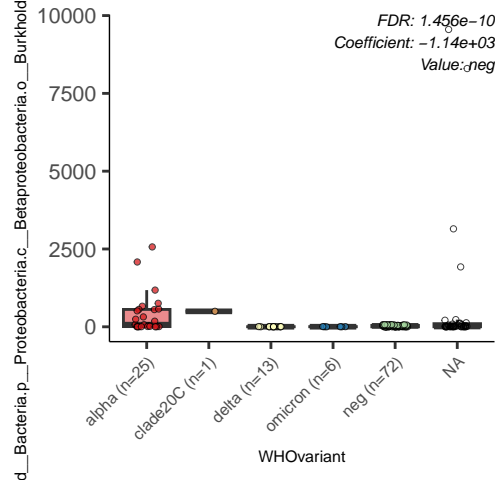



p\_\_Proteobacteria.c\_\_Betaproteobacteria.o\_\_Burkholderiales.g\_\_lr

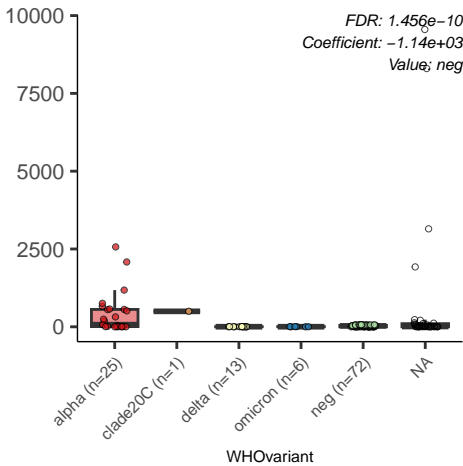

c\_\_Alphaproteobacteria.o\_\_Hyphomicrobiales.f\_\_Nitrobacteraceae.

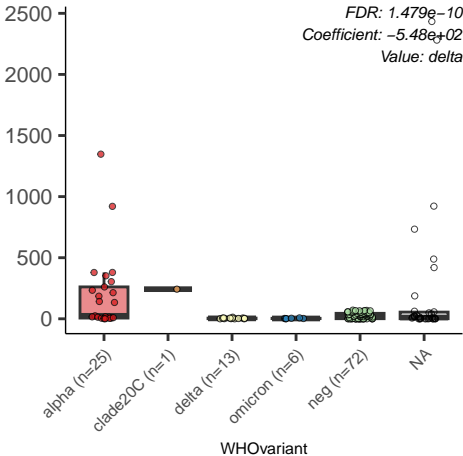

bacteria.p\_Firmicutes.c\_Clostridia.o\_Eubacteriales.f\_Lachnospir

*FDR: 1.705e-10*  
*Coefficient: -1.90e+03*  
*Value: omicron*

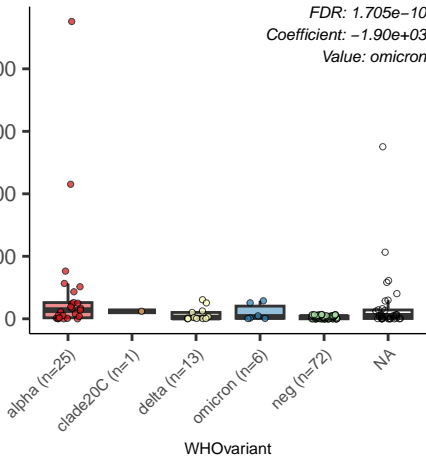

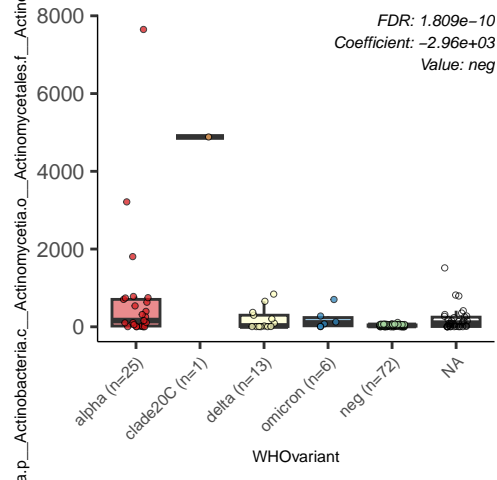

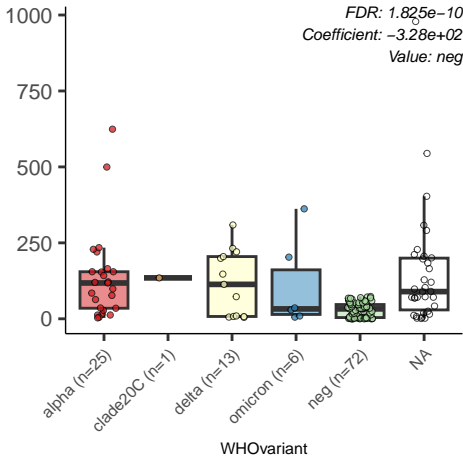

micutes.c\_\_Clostridia.o\_\_Eubacteriales.f\_\_Lachnospiraceae.g\_\_En

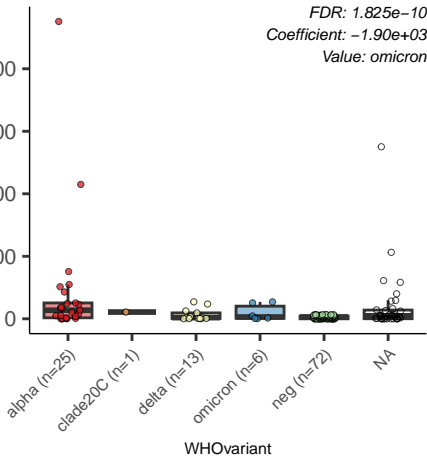

ia.p\_Firmicutes.c\_Clostridia.o\_Eubacteriales.f\_Lachnospiraceae

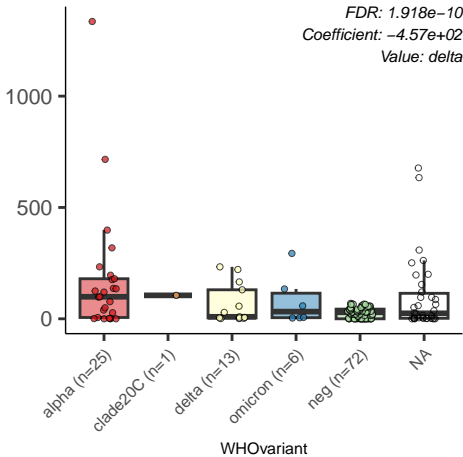

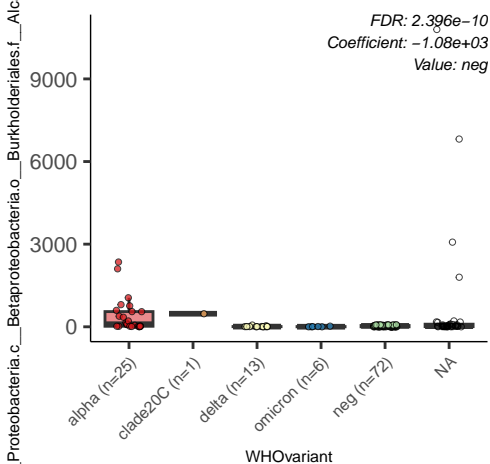



eria.p\_Firmicutes.c\_Clostridia.o\_Eubacteriales.f\_Lachnospiraceae

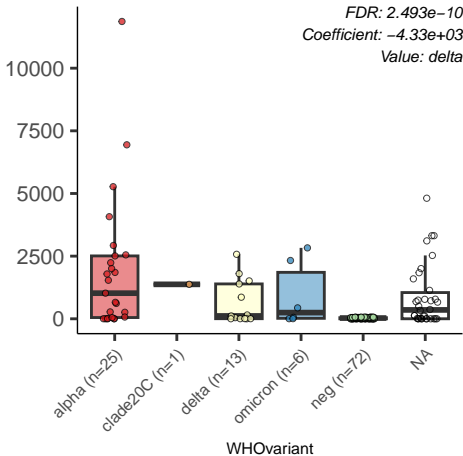

s.c.\_Clostridia.o\_Eubacteriales.f\_Lachnospiraceae.g\_Pseudobu

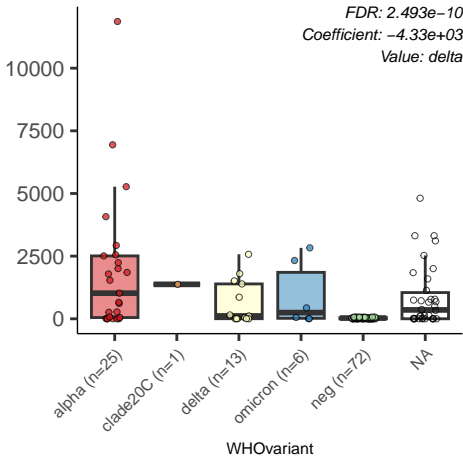

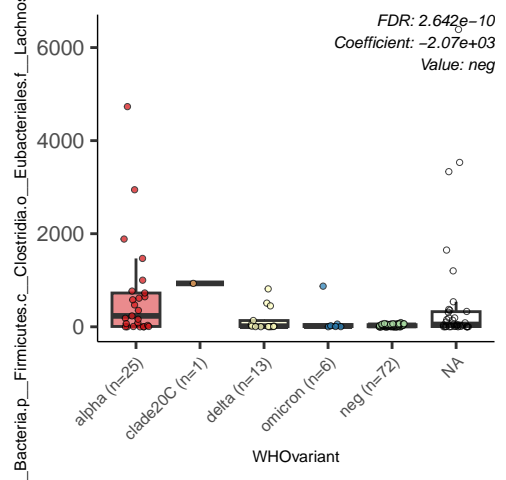



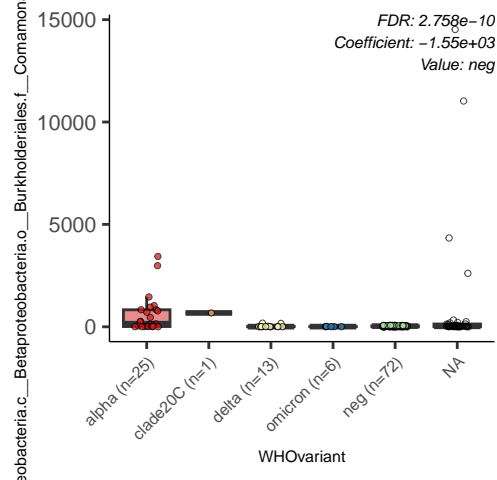

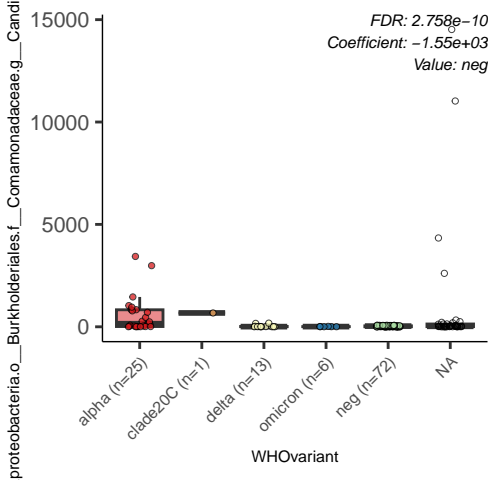

Bacteria.p\_\_Proteobacteria.c\_\_Alphaproteobacteria.o\_\_Rickettsia

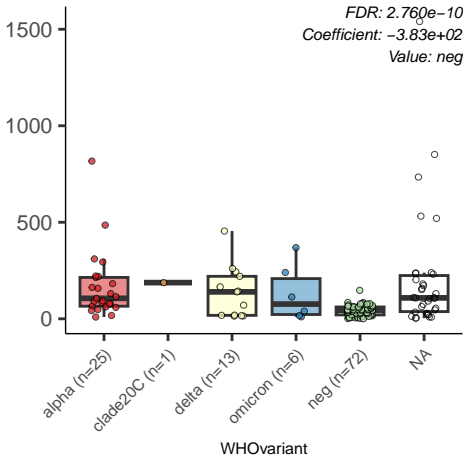

\_\_Bacteria.p\_\_Proteobacteria.c\_\_Betaproteobacteria.o\_\_Burkholder

FDR:  $2.775e-10$   
Coefficient:  $-7.70e+02$   
Value: neg

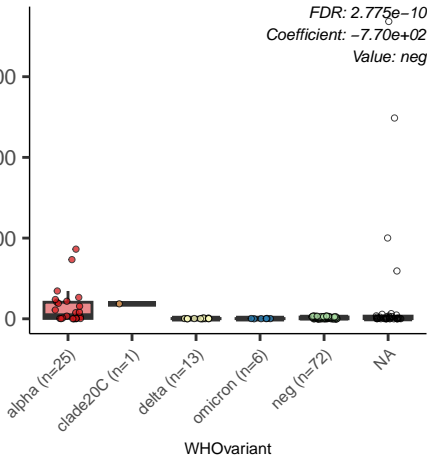



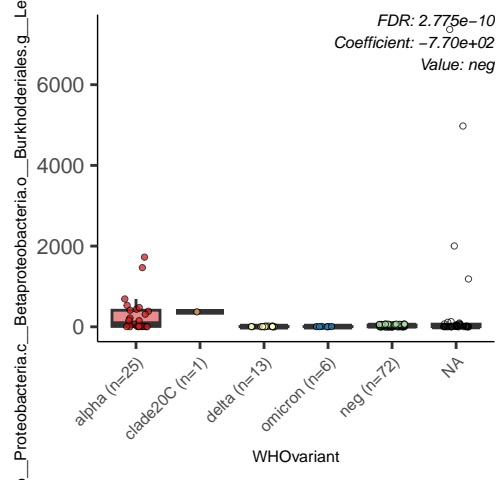

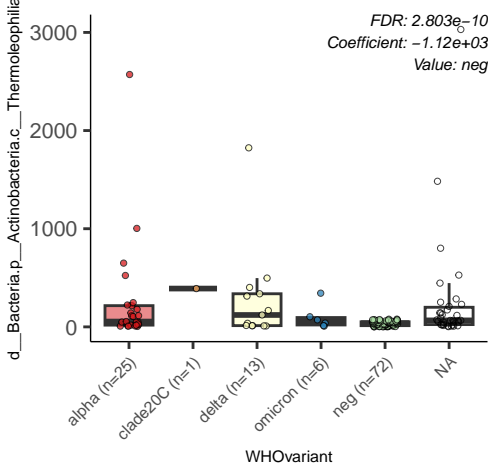

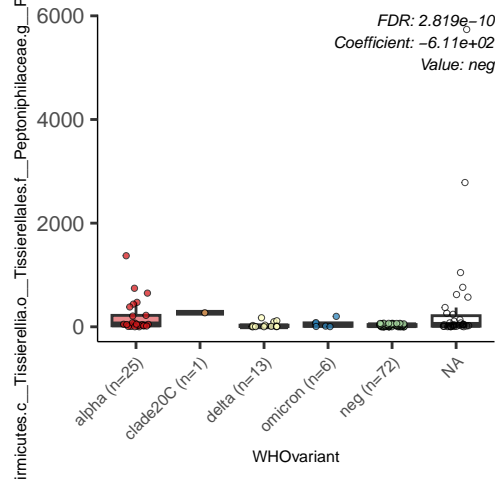

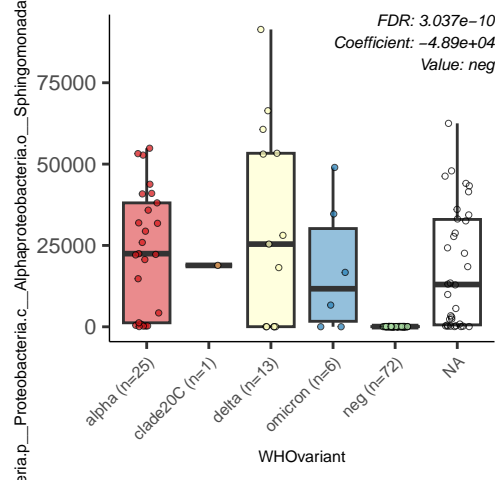

eria.p\_\_Firmicutes.c\_\_Clostridia.o\_\_Eubacteriales.f\_\_Lachnospiraceae

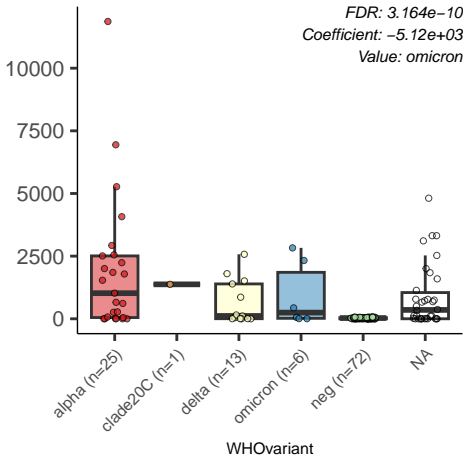

s.c.\_Clostridia.o\_Eubacteriales.f\_Lachnospiraceae.g\_Pseudobu

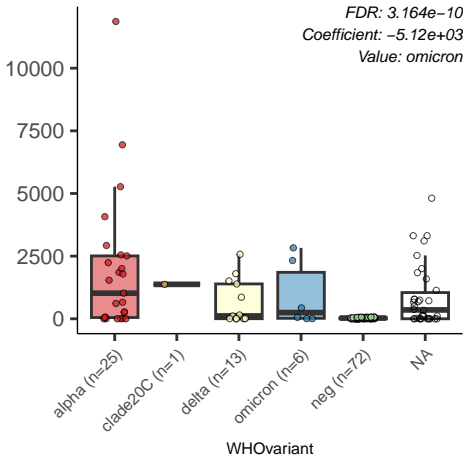

cteria.p\_Actinobacteria.c\_Thermoleophilia.o\_Solirubrobacterales

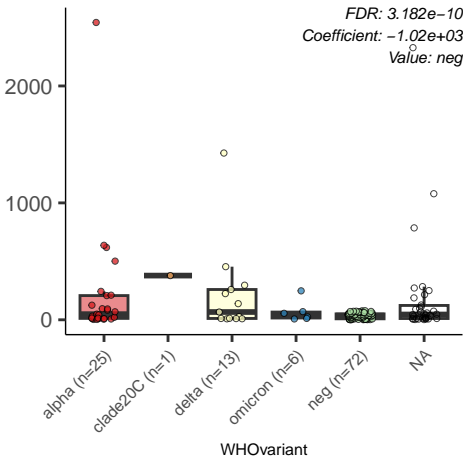

Actinobacteria.c\_\_Thermoleophila.o\_\_Solirubrobacterales.f\_\_Con

FDR:  $3.182e-10$   
Coefficient:  $-1.02e+03$   
Value: neg

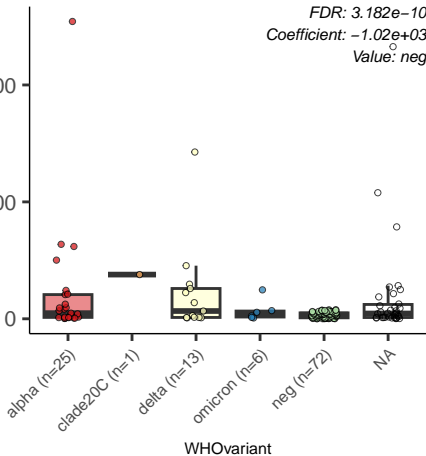



p\_Firmicutes.c\_Clostridia.o\_Eubacteriales.f\_Lachnospiraceae

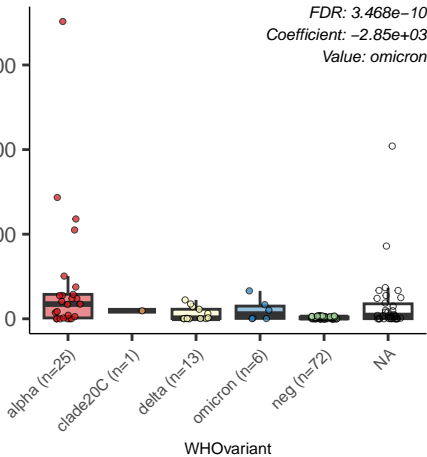

eria.p\_\_Verrucomicrobia.c\_\_Verrucomicrobiae.o\_\_Verrucomicrobiale

*FDR: 3.788e-10*  
*Coefficient: -1.18e+03*  
*Value: neg*

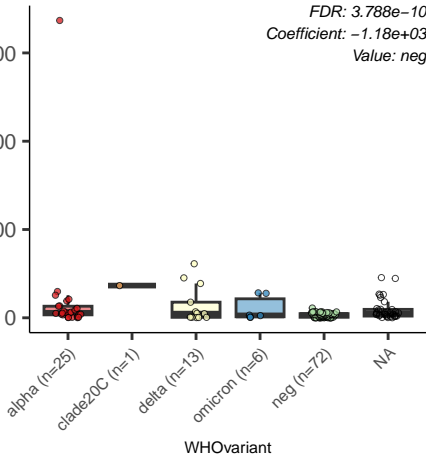

bacteria.p\_Firmicutes.c\_Clostridia.o\_Eubacteriales.f\_Lachnospir

FDR:  $3.788e-10$   
Coefficient:  $-1.56e+03$   
Value: delta

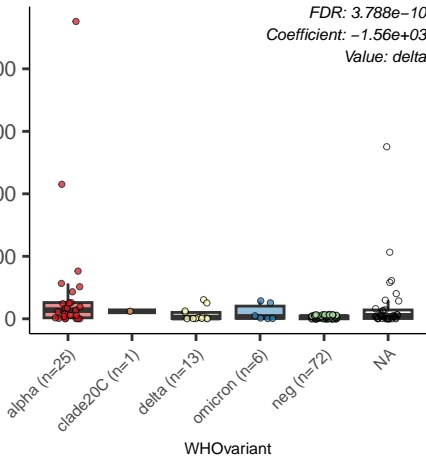

Bacteria.p\_Firmicutes.c\_Clostridia.o\_Eubacteriales.f\_Lachnosp

*FDR: 3.833e-10*  
*Coefficient: -5.37e+03*  
*Value: delta*

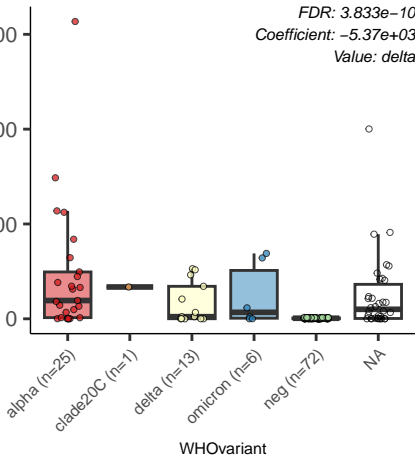

micutes.c\_\_Clostridia.o\_\_Eubacteriales.f\_\_Lachnospiraceae.g\_\_En

*FDR: 3.853e-10*  
*Coefficient: -1.56e+03*  
*Value: delta*

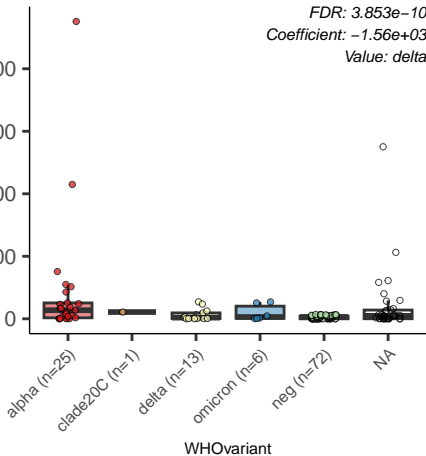

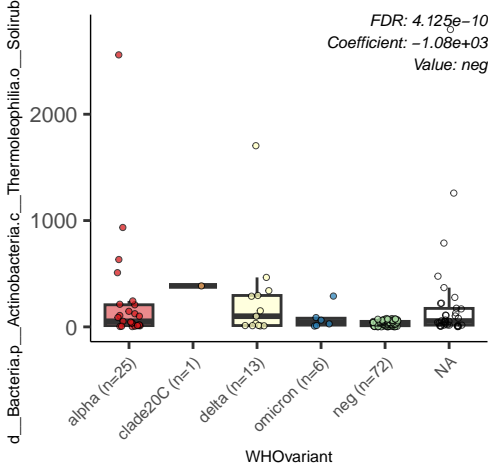

Firmicutes.c\_\_Clostridia.o\_\_Eubacteriales.f\_\_Lachnospiraceae.g\_\_R

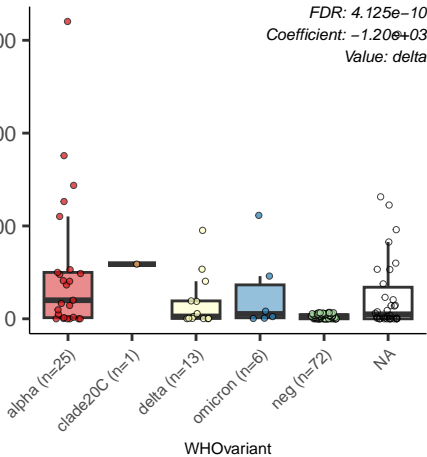

bacteria.p\_\_Firmicutes.c\_\_Clostridia.o\_\_Eubacteriales.f\_\_Oscillospir

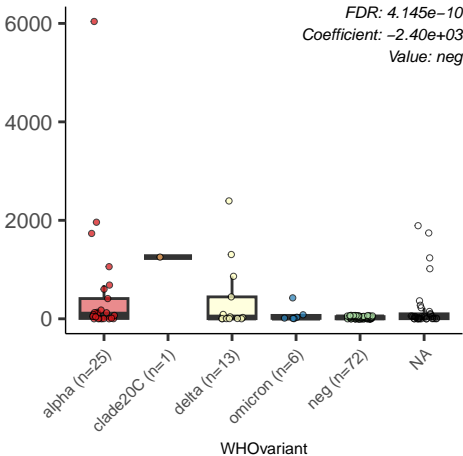



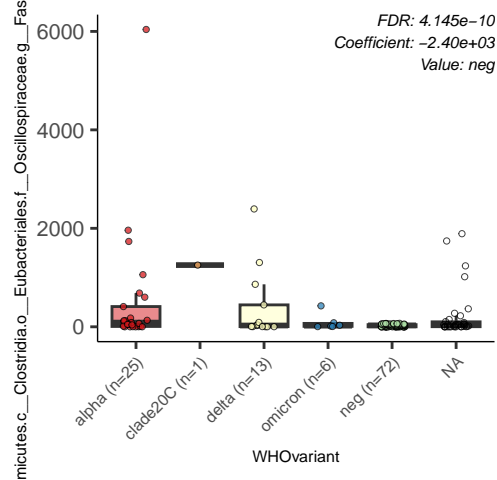

Bacteria.p\_Firmicutes.c\_Clostridia.o\_Eubacteriales.f\_\_Vallitale

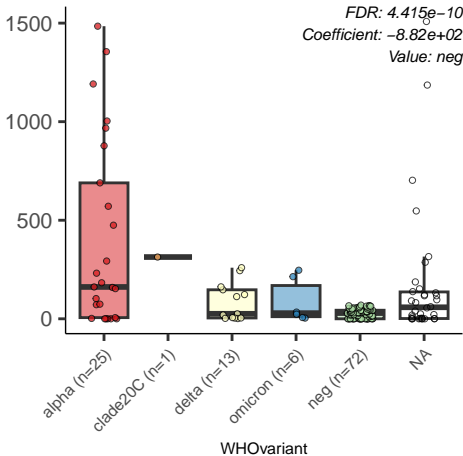

Firmicutes.c\_\_Clostridia.o\_\_Eubacteriales.f\_\_Vallitaleaceae.g\_\_Pet

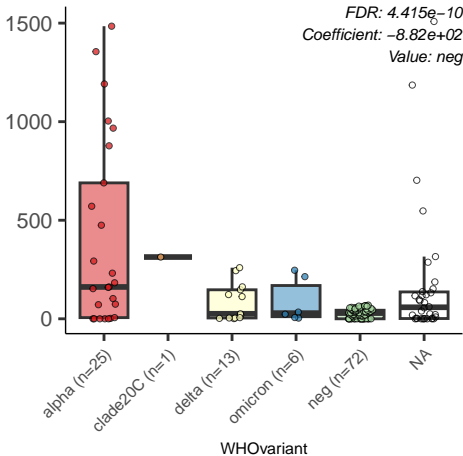

d\_\_Bacteria.p\_\_Firmicutes.c\_\_Clostridia.o\_\_Eubacteriales.f\_\_Pr

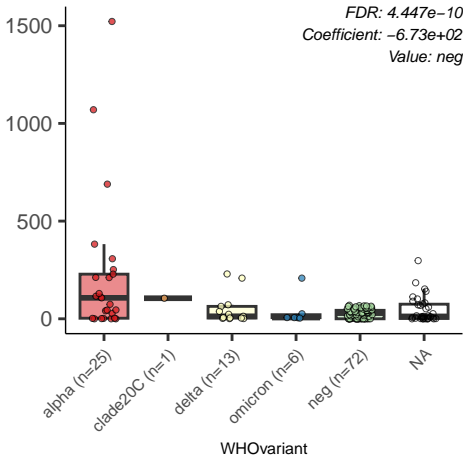

Bacteria.p\_Firmicutes.c\_Clostridia.o\_Eubacteriales.f\_Proteini

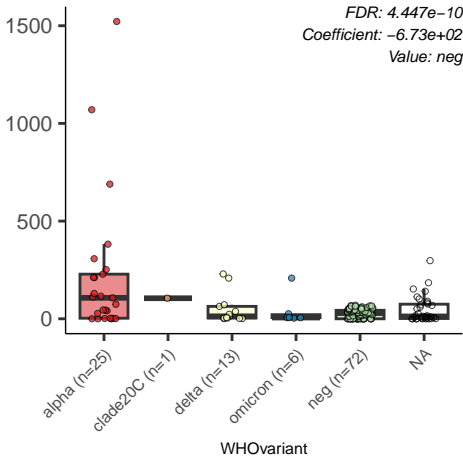

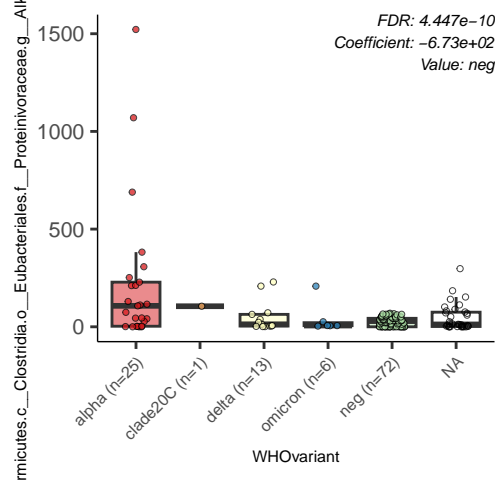

eria.p\_Firmicutes.c\_\_Clostridia.o\_\_Eubacteriales.f\_\_Lachnospirac

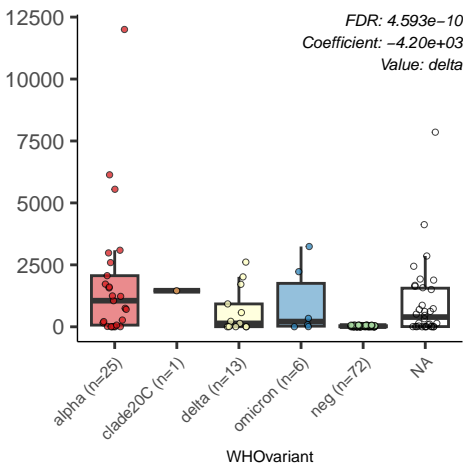

d\_Bacteria.p\_Firmicutes.c\_Tissierellia.g\_Ezakiella.s\_Ezak

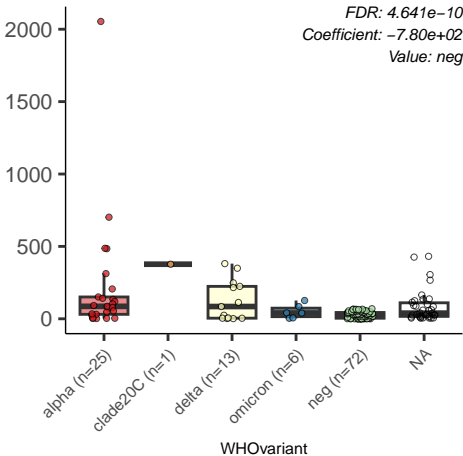



obacteria.c\_\_Betaproteobacteria.o\_\_Burkholderiales.f\_\_Comamonad

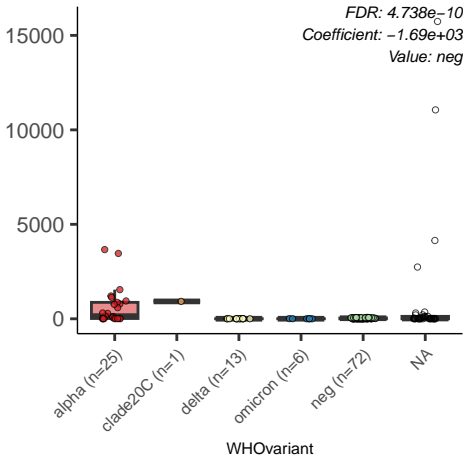

ria.p\_\_Proteobacteria.c\_\_Alphaproteobacteria.o\_\_Sphingomonadales

FDR:  $4.808e-10$   
Coefficient:  $-3.15e+03$   
Value: neg

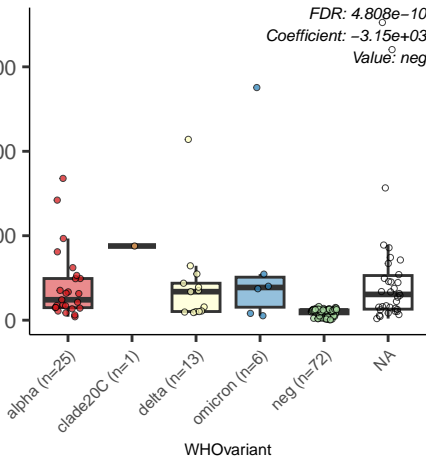

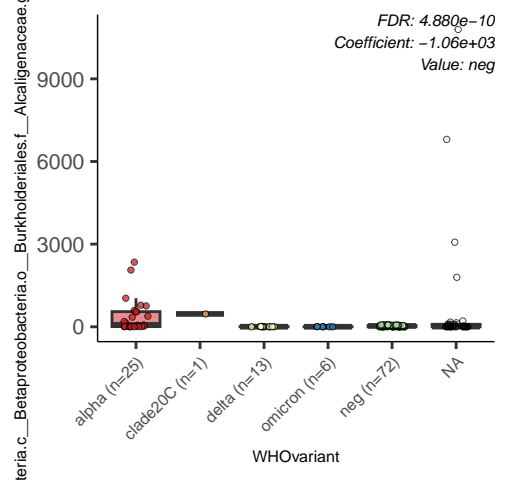

a.p\_Firmicutes.c\_Clostridia.o\_Eubacteriales.f\_Desulfitobacteri

*FDR: 4.880e-10*  
*Coefficient: -7.27e+02*  
*Value: neg*

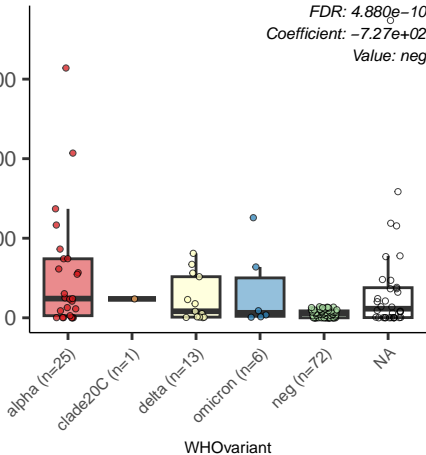

a.p.\_Proteobacteria.c.\_Alphaproteobacteria.o.\_Hyphomicrobiales.

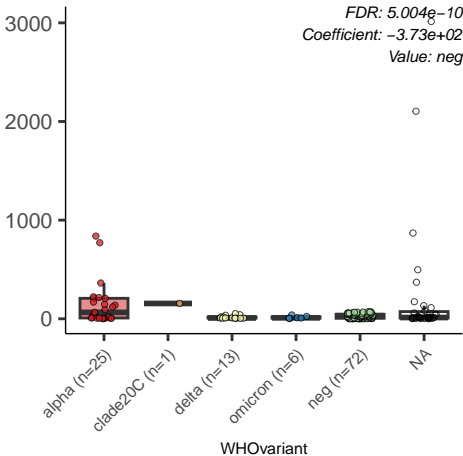

Bacteria.p\_\_Tenericutes.c\_\_Mollicutes.o\_\_Entomoplasmatales.f

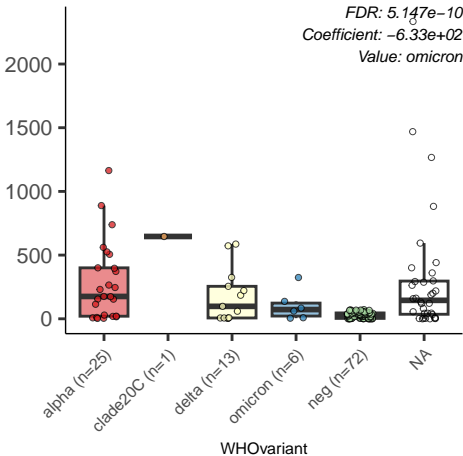

ia.p\_\_Tenericutes.c\_\_Mollicutes.o\_\_Entomoplasmatales.f\_\_Spiroplasma

FDR:  $5.147e-10$   
Coefficient:  $-6.33e+02$   
Value: omicron

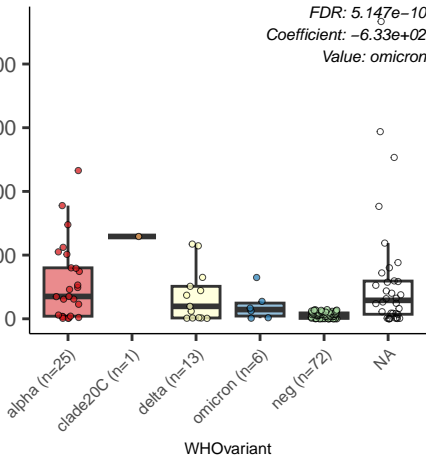

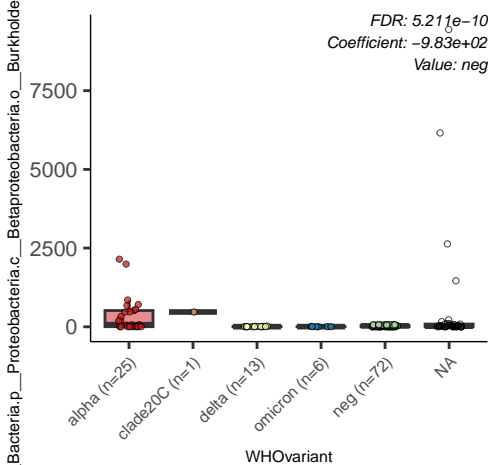



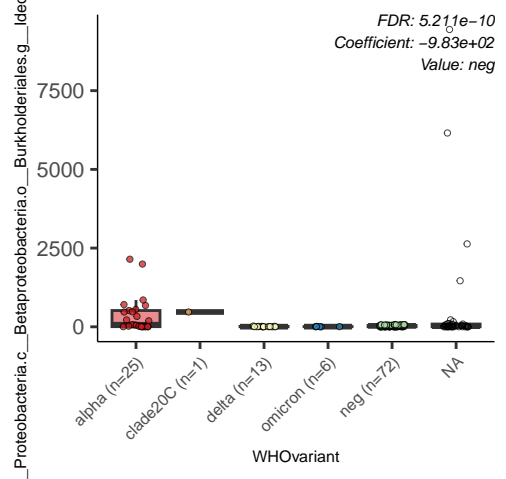

oteobacteria.c\_\_Alphaproteobacteria.o\_\_Sphingomonadales.f\_\_Ery

FDR:  $5.368e-10$   
Coefficient:  $-4.81e+04$   
Value: neg

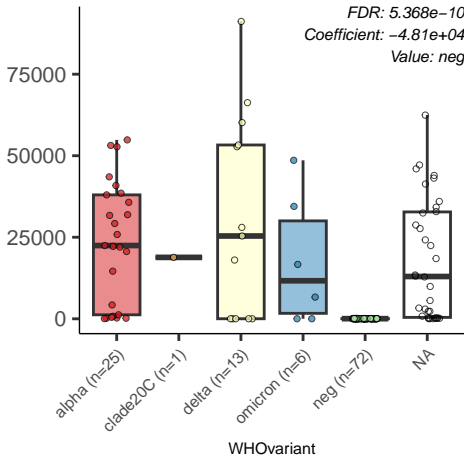

Alpha proteobacteria.o\_Sphingomonadales.f\_Erythrobacteraceae

FDR:  $5.373 \times 10^{-10}$   
Coefficient:  $-4.80 \times 10^4$   
Value: neg

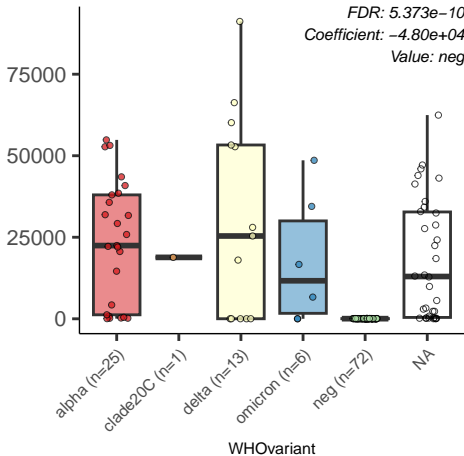

Bacteria.p\_\_Bacteroidetes.c\_\_Flavobacteriia.o\_\_Flavobacteriales.f

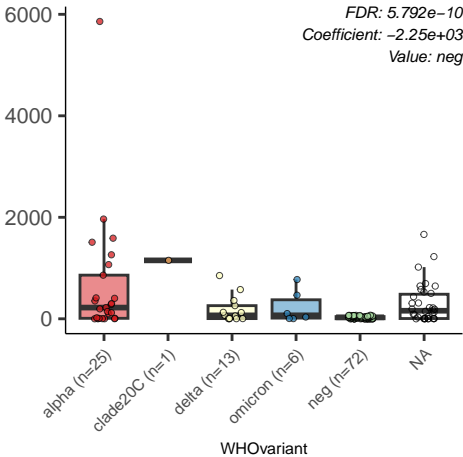

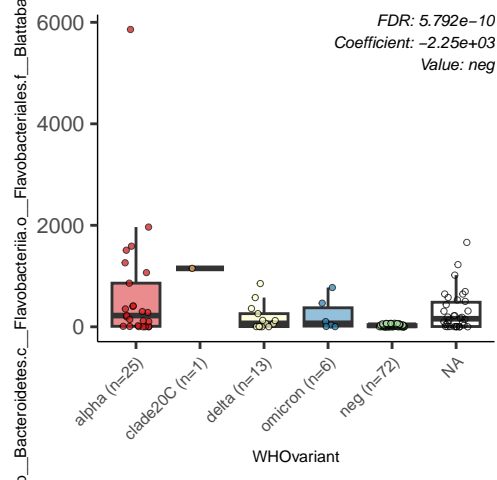

Value: neg

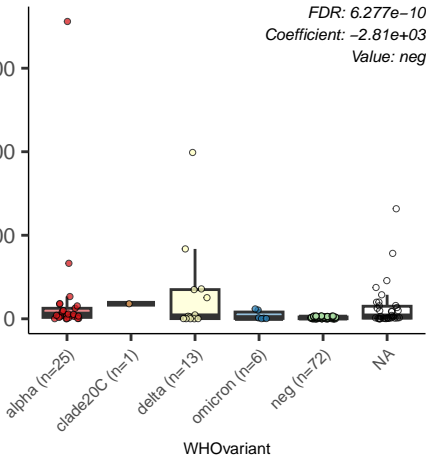

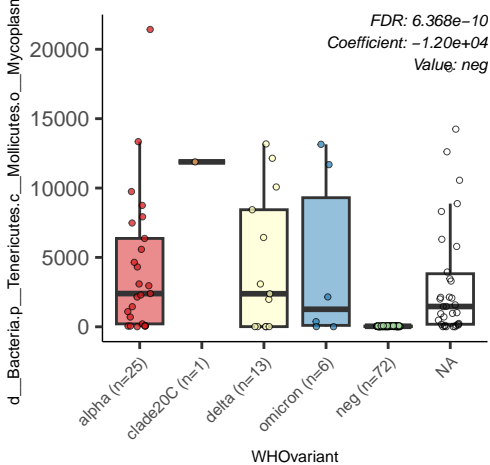

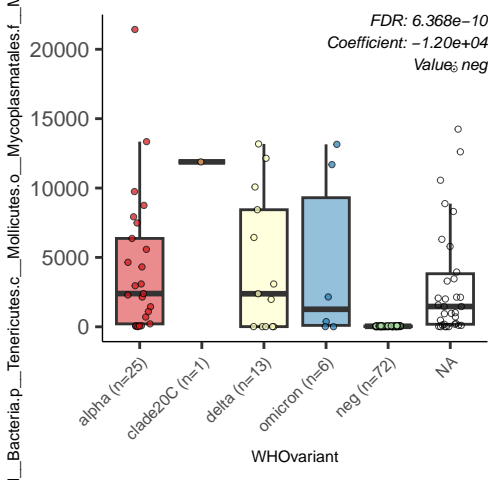



ates.c\_\_Sphingobacteria.o\_\_Sphingobacteriales.f\_\_Sphingobacteri

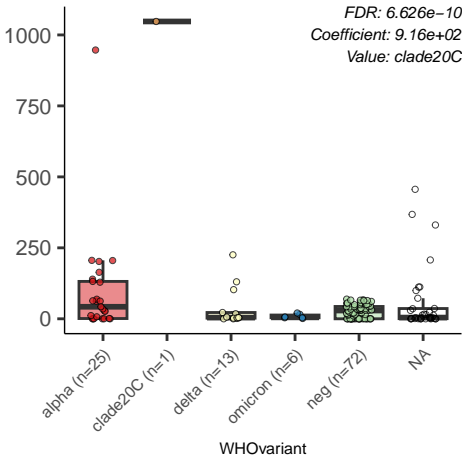

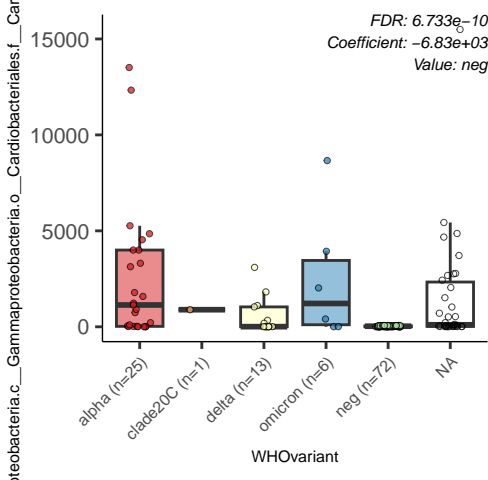

Bacteria.p\_Firmicutes.c\_Clostridia.o\_Eubacteriales.f\_Lachnosp

FDR:  $6.900e-10$   
Coefficient:  $-6.28e+03$   
Value: omicron

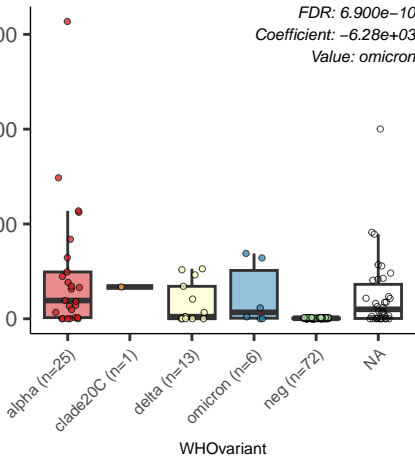

FDR:  $6.907e-10$   
Coefficient:  $-9.72e+02$   
Value: neg

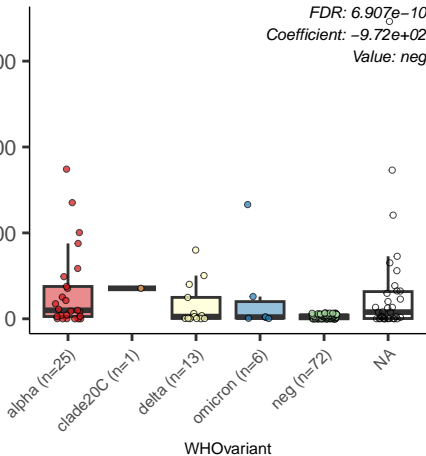

irmicutes.c\_\_Clostridia.o\_\_Eubacteriales.f\_\_Lachnospiraceae.g\_\_S

$FDR: 6.907e-10$   
 $Coefficient: -9.72e+02$   
 $Value: neg$

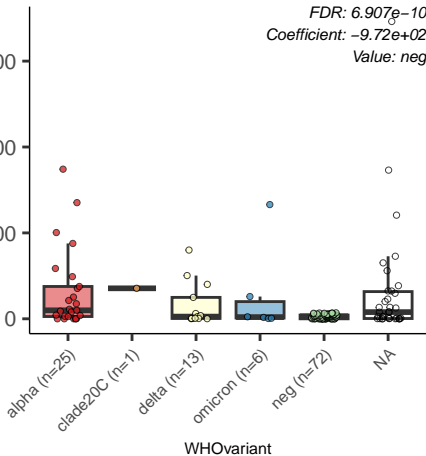

g\_\_Clostridia.o\_\_Eubacteriales.f\_\_Lachnospiraceae.g\_\_Lachnoclostridium

FDR:  $7.045e-10$   
Coefficient:  $-3.43e+03$   
Value: delta

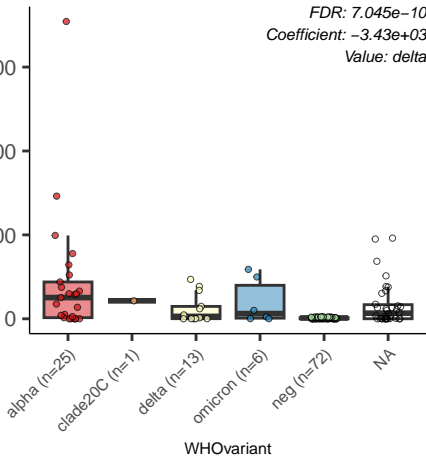

Actinomycetia.o\_\_Pseudonocardiales.f\_\_Pseudonocardaceae.g\_\_S

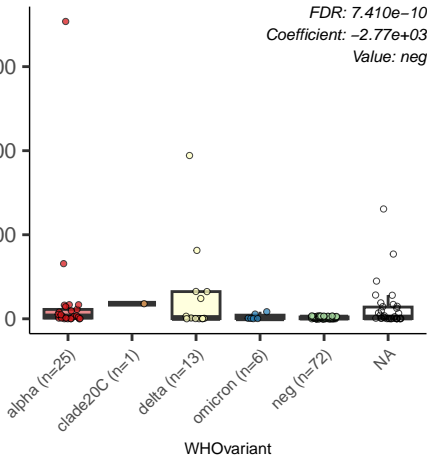

Bacteria.p\_\_Proteobacteria.c\_\_Alphaproteobacteria.o\_\_Rickettsiales

FDR:  $7.416e-10$   
Coefficient:  $-6.05e+02$   
Value: neg

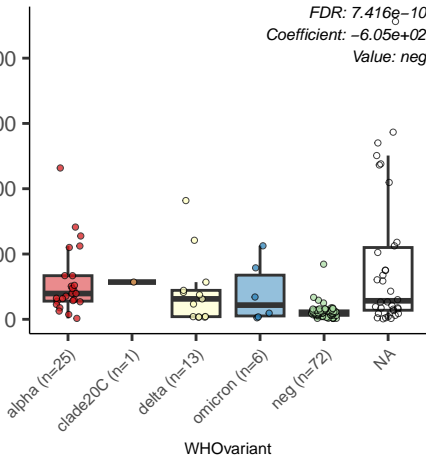



Bacteria.p\_\_Proteobacteria.c\_\_Betaproteobacteria.o\_\_Burkholderia

FDR:  $7.539 \times 10^{-10}$   
Coefficient:  $-1.07 \times 10^3$   
Value: neg

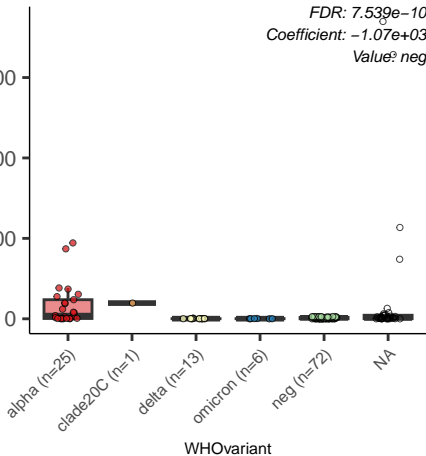

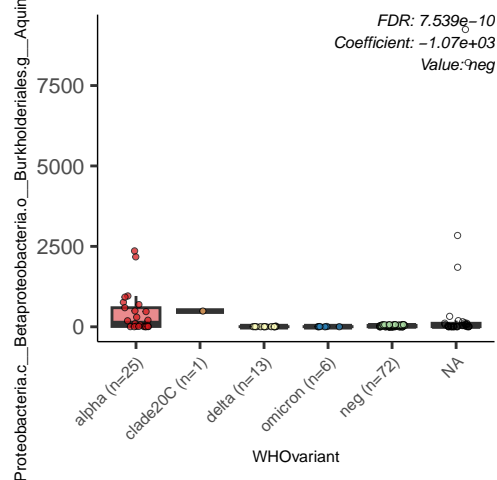

d\_Bacteria.p\_\_Proteobacteria.c\_\_Gammaproteobacteria.o\_\_Ca

FDR:  $8.073e-10$   
Coefficient:  $-7.37e+03$   
Value: neg

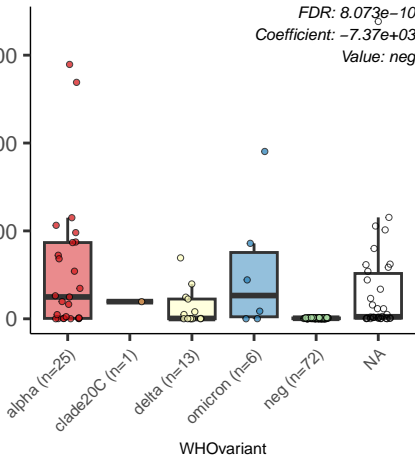

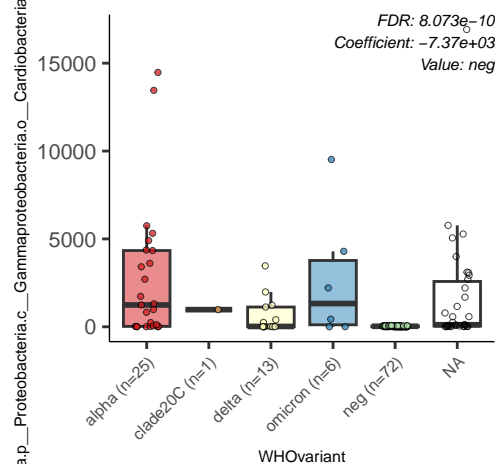

d\_\_Bacteria.p\_\_Tenericutes.c\_\_Mollicutes.o\_\_Entomoplas

FDR:  $8.073e-10$   
Coefficient:  $-9.47e+02$   
Value: neg

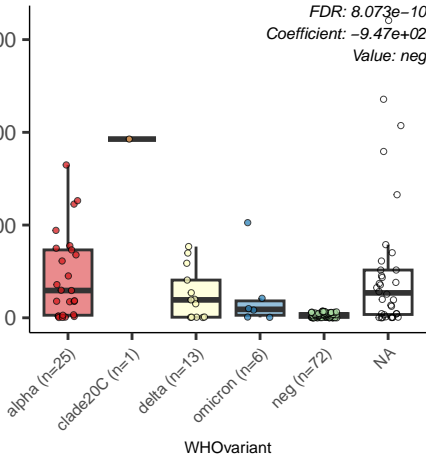

ia.p\_\_Proteobacteria.c\_\_Alphaproteobacteria.o\_\_Rickettsiales.f\_\_R

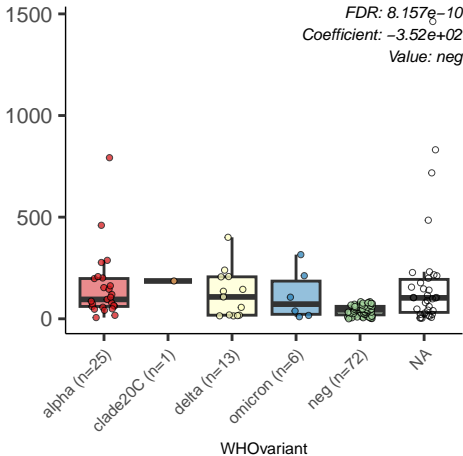

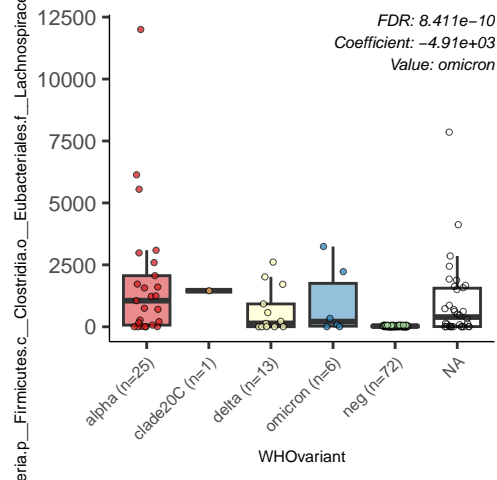

FDR:  $8.692e-10$   
Coefficient:  $-3.32e+03$   
Value: omicron

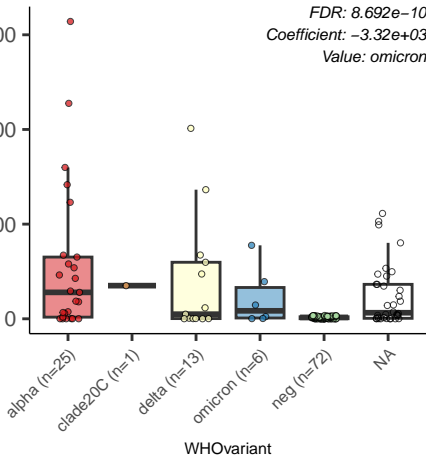



icutes.c\_\_Clostridia.o\_\_Eubacteriales.f\_\_Lachnospiraceae.g\_\_Anaer

FDR:  $8.692e-10$   
Coefficient:  $-3.32e+03$   
Value: omicron

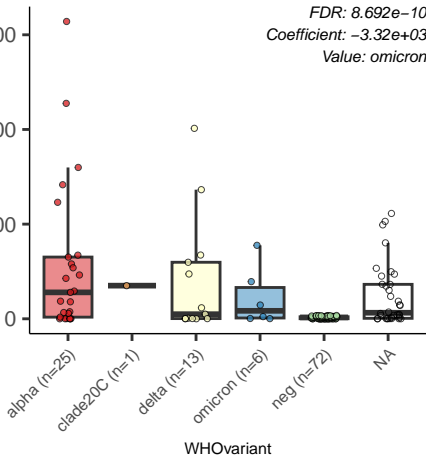

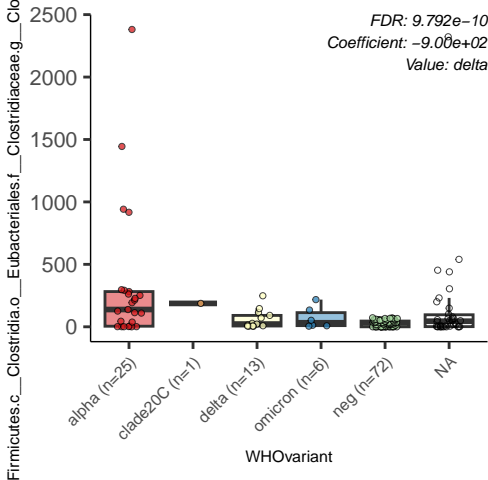

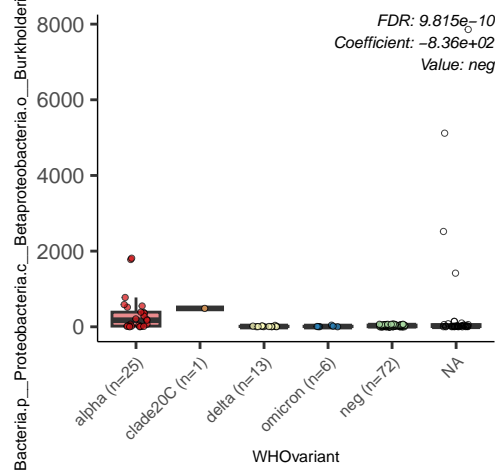

Firmicutes.c\_\_Clostridia.o\_\_Eubacteriales.f\_\_Clostridiaceae.g\_\_Cl

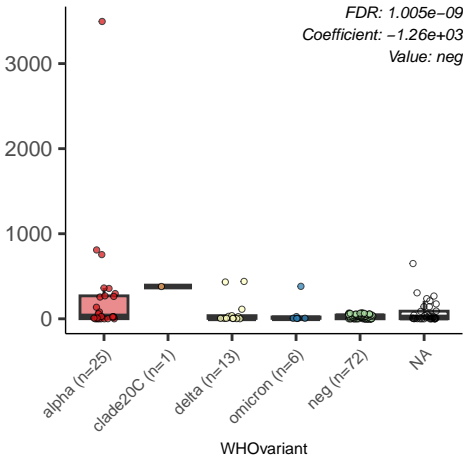

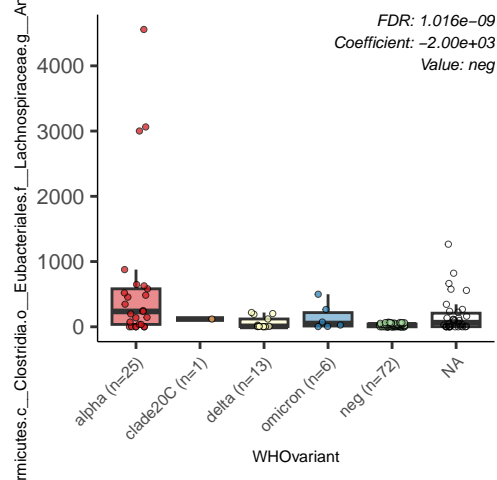

c: Clostridia.o Eubacteriales.f Lachnospiraceae.g Lachnoclostr

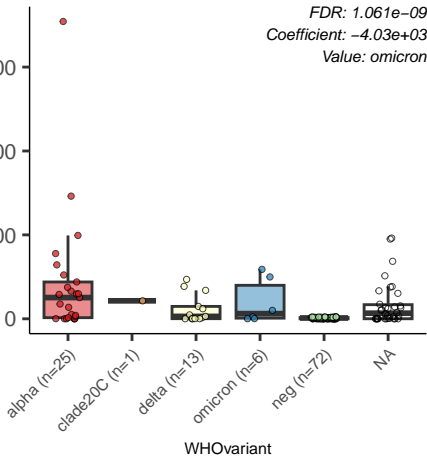

bacteria.p\_\_Proteobacteria.c\_\_Alphaproteobacteria.o\_\_Hyphomicrob

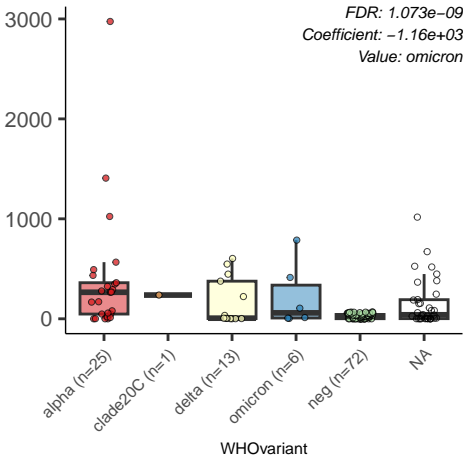

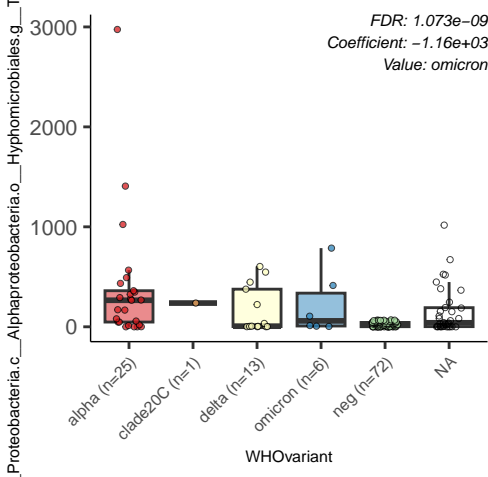



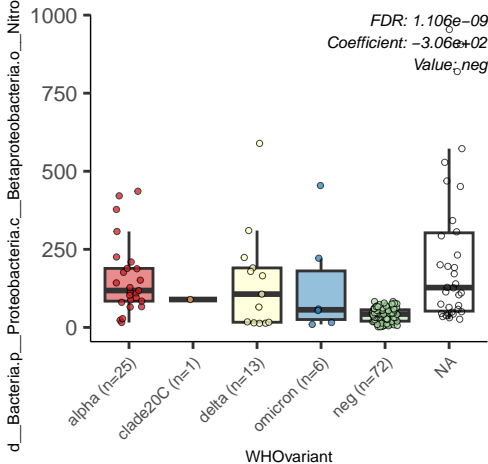



bacteria.c\_\_Actinomycetia.o\_\_Actinomycetales.f\_\_Actinomycetaceae

FDR:  $1.240e-09$   
Coefficient:  $-3.06e+03$   
Value: neg

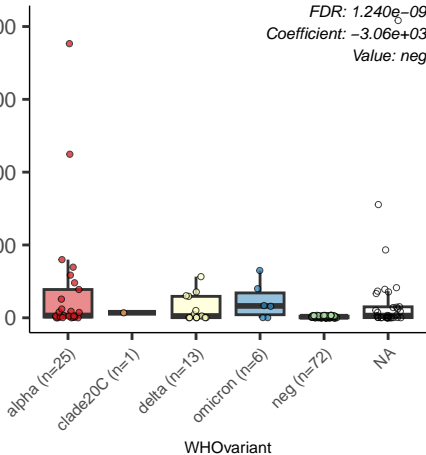

o\_\_Proteobacteria.c\_\_Alphaproteobacteria.o\_\_Rickettsiales.f\_\_Anapl

*FDR: 1.456e-09*  
*Coefficient: -4.92e+02*  
*Value: neg*

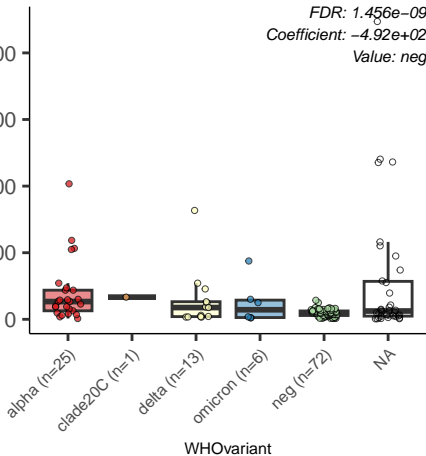

Bacteria.p\_\_Proteobacteria.c\_\_Betaproteobacteria.o\_\_Burkholderia

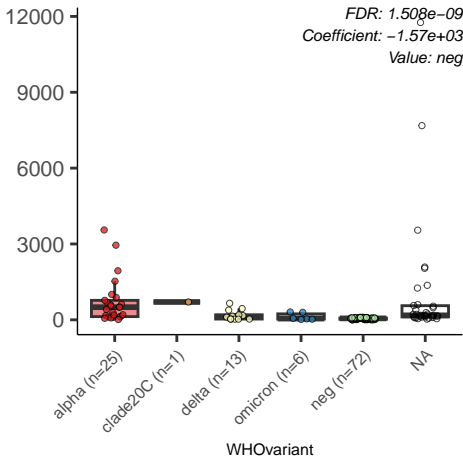

ria.p\_\_Bacteroidetes.c\_\_Flavobacteriia.o\_\_Flavobacteriales.f\_\_Flav

*FDR: 1.508e-09*  
*Coefficient: -3.44e+02*  
*Value: neg*

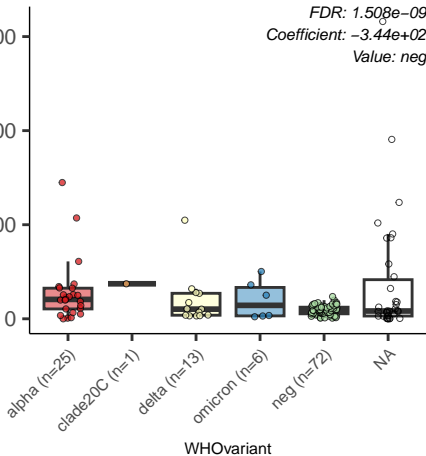

acteroidetes.c\_\_Flavobacteriia.o\_\_Flavobacteriales.f\_\_Flavobacteri

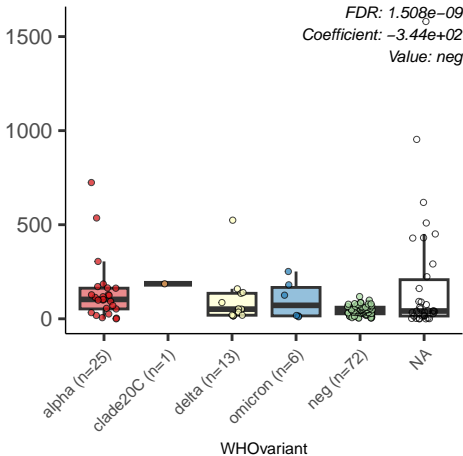

d\_Bacteria.p\_\_Bacteroidetes.c\_\_Bacteroidia.o\_\_Bacteroidales.f\_\_

FDR:  $1.508e-09$   
Coefficient:  $-9.23e+02$   
Value: neg

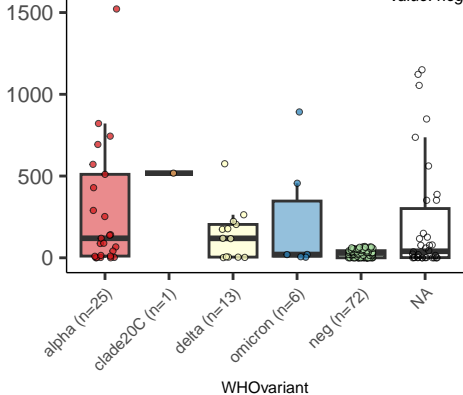



bacteria.p\_\_Bacteroidetes.c\_\_Bacteroidia.o\_\_Bacteroidales.f\_\_Tenu

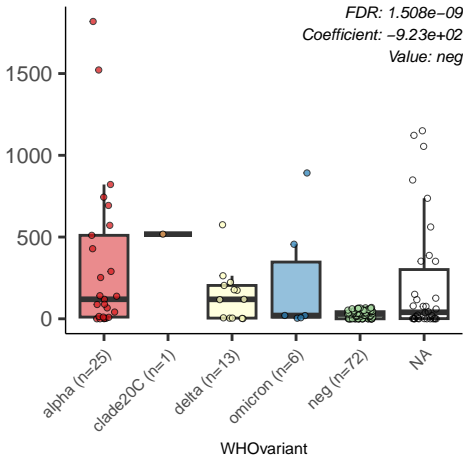

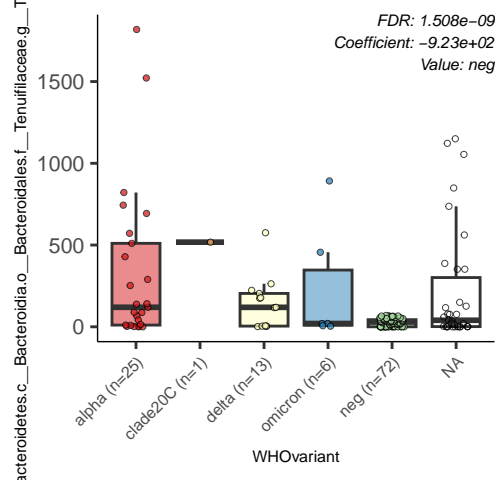

bacteria.c\_\_Fusobacteriia.o\_\_Fusobacteriales.f\_\_Leptotrichiaceae.g

FDR: 1.518e-09  
Coefficient: -2.12e+03  
Value: neg

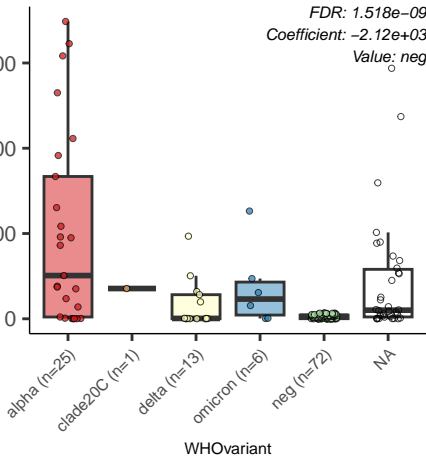

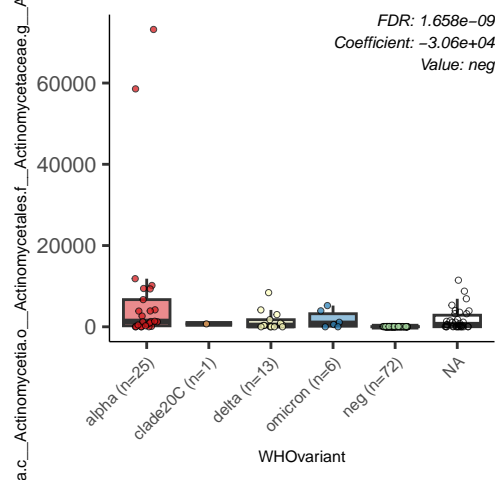

Proteobacteria.c\_\_Betaproteobacteria.o\_\_Burkholderiales.f\_\_Cor

FDR:  $1.754e-09$   
Coefficient:  $-8.53e+02$   
Value: neg

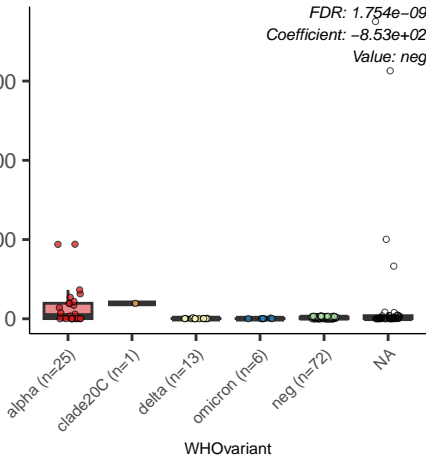

FDR:  $1.953e-09$   
Coefficient:  $-1.36e+03$   
Value: omicron

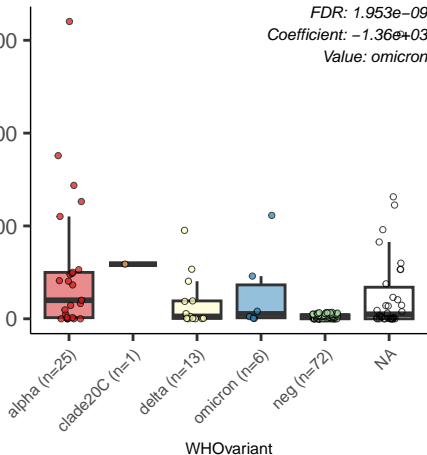

Firmicutes.c\_\_Clostridia.o\_\_Eubacteriales.f\_\_Lachnospiraceae.g

FDR: 1.972e-09

Coefficient: -3.52e+03

Value: delta

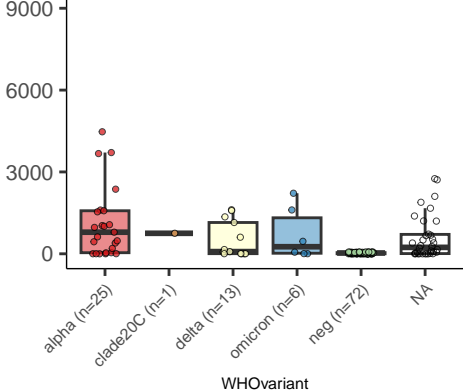

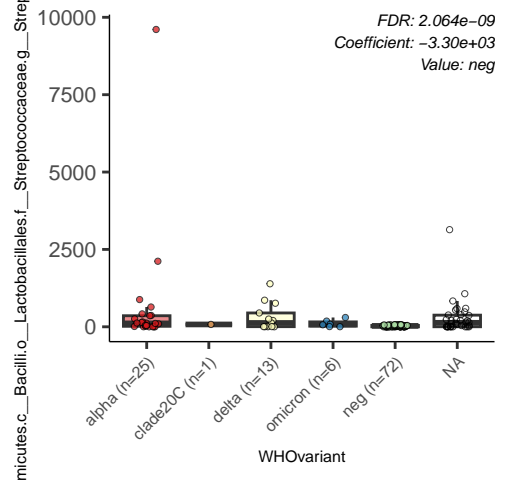



Betaproteobacteria.o\_\_Burkholderiales.f\_\_Comamonadaceae.g

FDR:  $2.078e-09$   
Coefficient:  $-8.36e+02$   
Value: neg

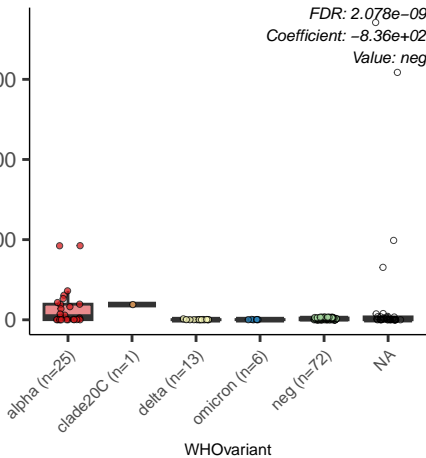

bacteria.p\_Firmicutes.c\_Clostridia.o\_Eubacteriales.f\_Peptostrept

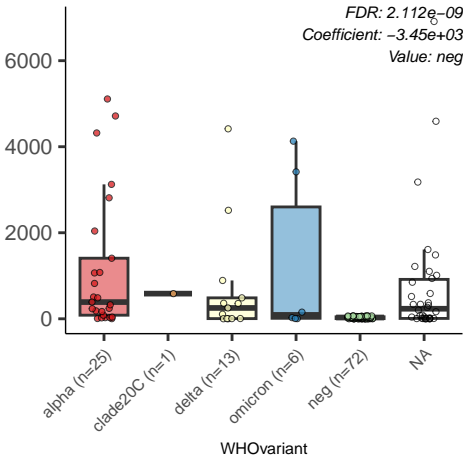

FDR:  $2.112e-09$   
Coefficient:  $-3.45e+03$   
Value: neg

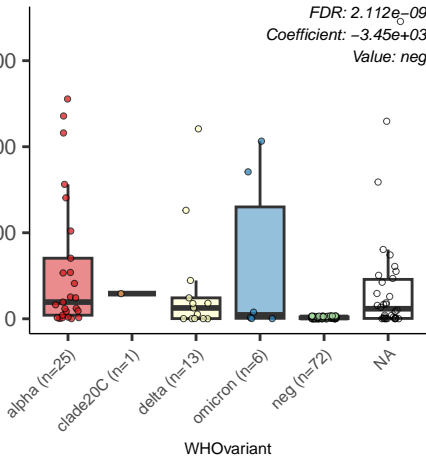

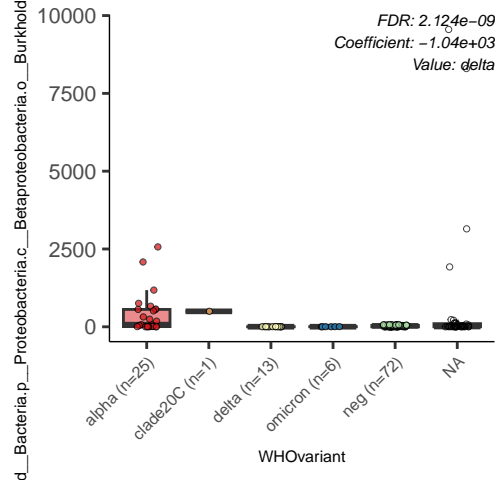

p\_\_Proteobacteria.c\_\_Betaproteobacteria.o\_\_Burkholderiales.g\_\_lr

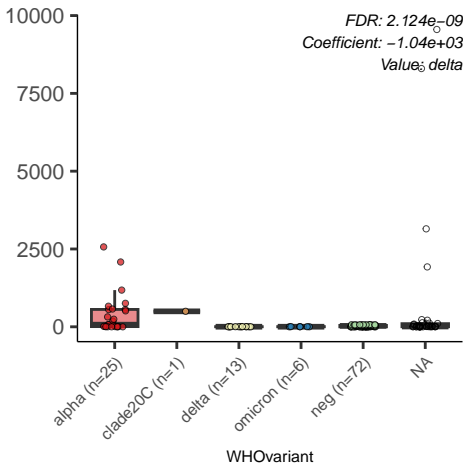

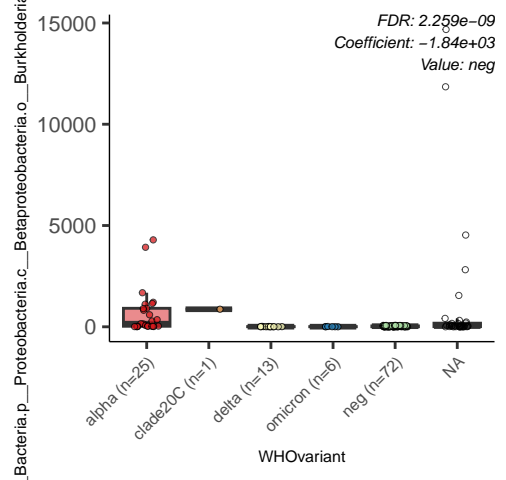

Firmicutes.c\_\_Clostridia.o\_\_Eubacteriales.f\_\_Lachnospiraceae.g

FDR: 2.273e-09  
Coefficient: -4.17e+03  
Value: omicron

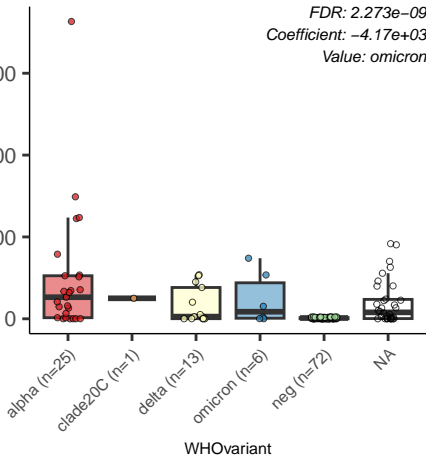

c\_\_Alphaproteobacteria.o\_\_Hyphomicrobiales.f\_\_Nitrobacteraceae.

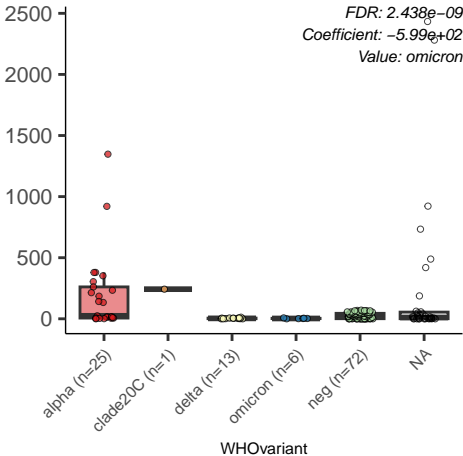



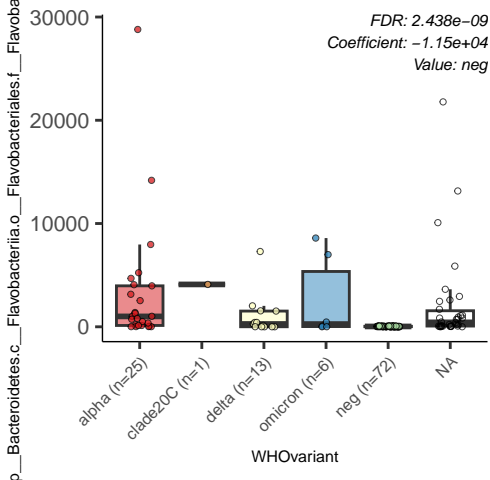

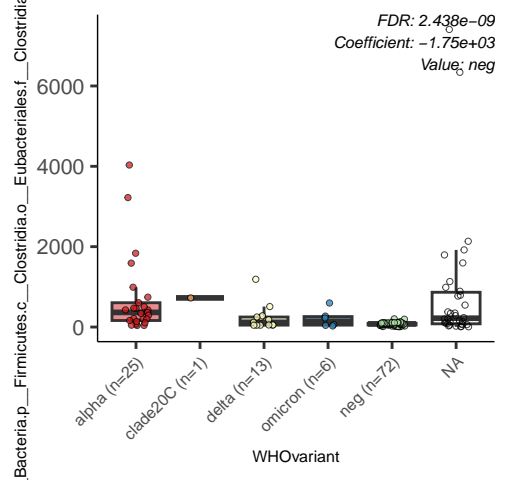

Firmicutes.c\_\_Clostridia.o\_\_Eubacteriales.f\_\_Clostridiaceae.g\_\_Ha

FDR:  $2.438e-09$   
Coefficient:  $-1.75e+03$   
Value: neg

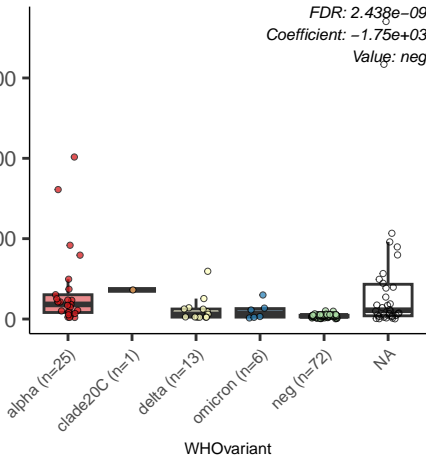

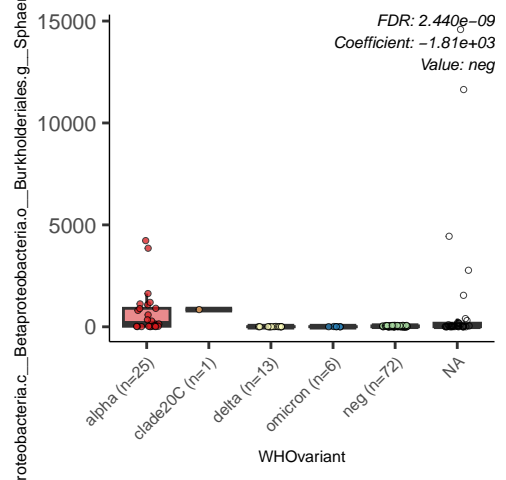

bacteria.c\_\_Gammaproteobacteria.o\_\_Pasteurellales.f\_\_Pasteurellace

FDR:  $2.481 \times 10^{-9}$   
Coefficient:  $-1.70 \times 10^4$   
Value: neg

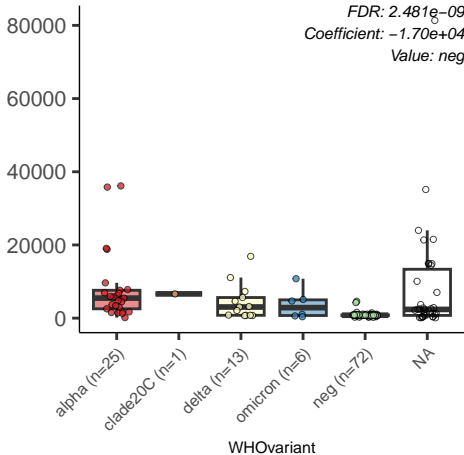

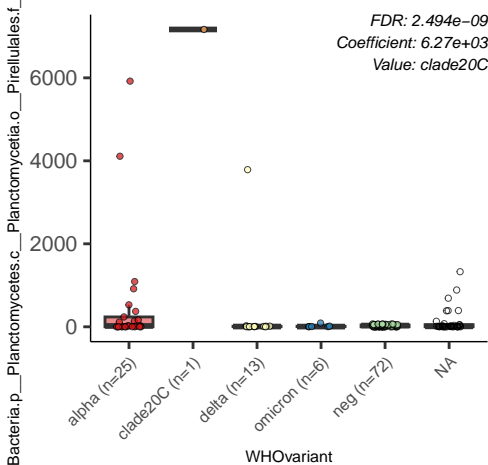

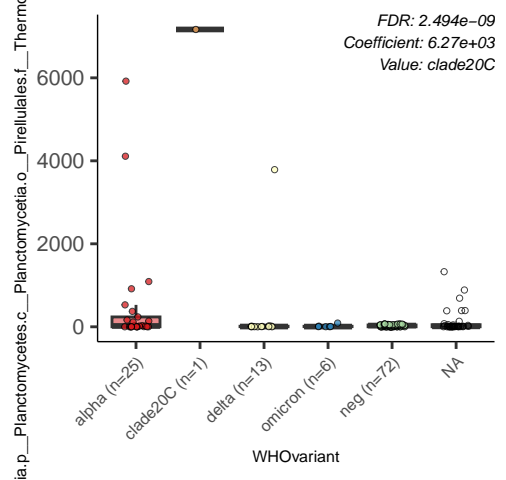

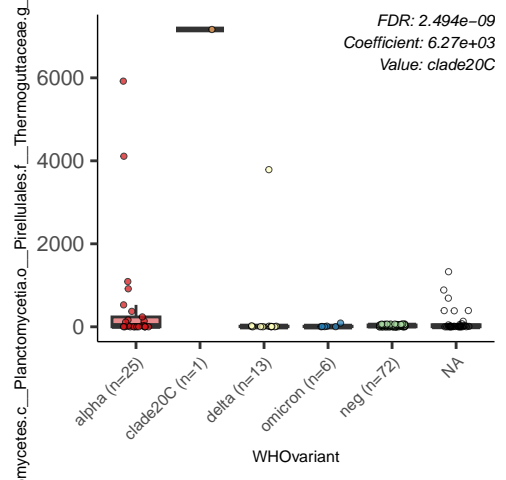



a.p\_\_Actinobacteria.c\_\_Actinomycetia.o\_\_Corynebacteriales.f\_\_No

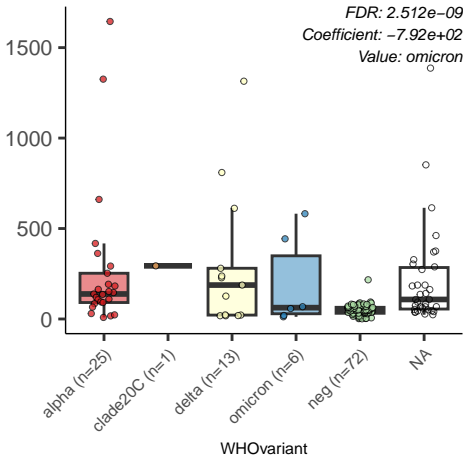

\_\_Bacteria.p\_\_Proteobacteria.c\_\_Betaproteobacteria.o\_\_Burkholder

$FDR: 2.554e-09$   
 $Coefficient: -7.12e+02$   
 $Value: delta$

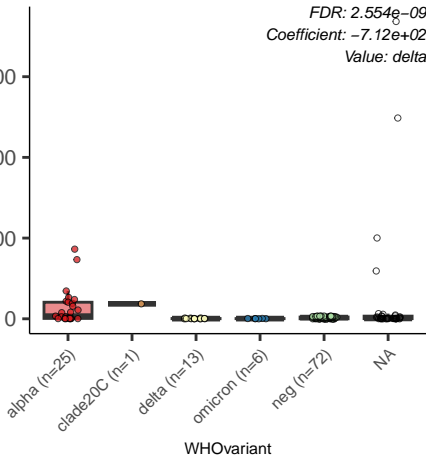

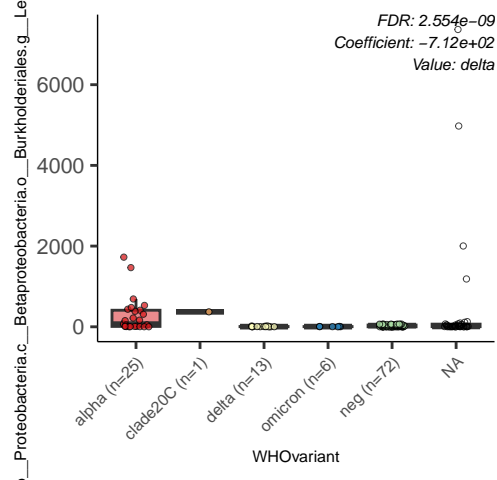

Firmicutes.c\_\_Clostridia.o\_\_Eubacteriales.f\_\_Oscillospiraceae.g\_\_A

*FDR: 2.554e-09*  
*Coefficient: -1.33e+03*  
*Value: neg*

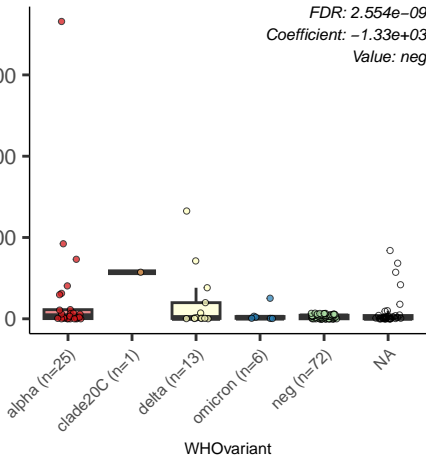

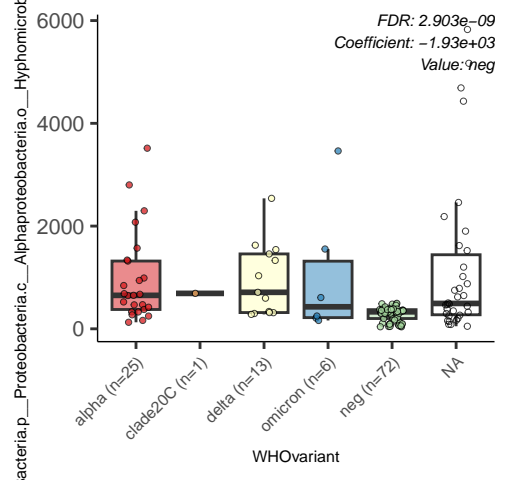

d\_\_Bacteria.p\_\_Cyanobacteria.o\_\_Pseudanabaena

FDR:  $2.903e-09$   
Coefficient:  $-4.60e+03$   
Value: neg

10000

5000

0

alpha (n=25)

clade20C (n=1)

delta (n=13)

omicron (n=6)

neg (n=72)

NA

WHOvariant

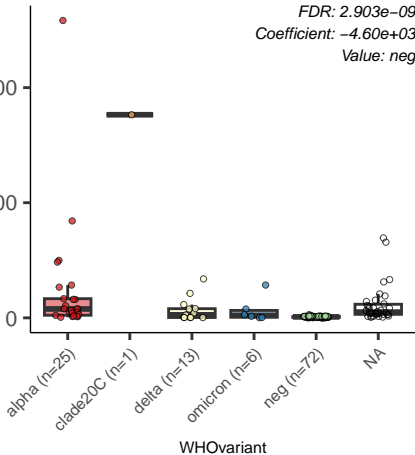

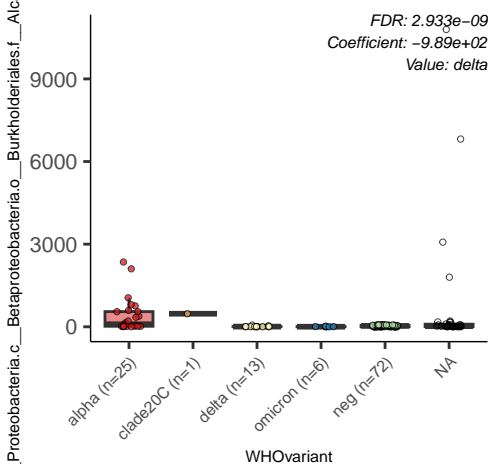

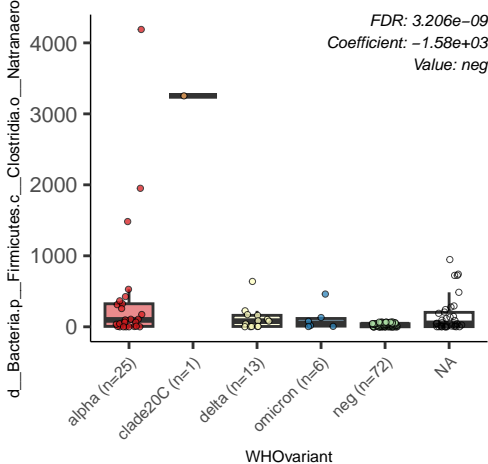



a.p.\_Proteobacteria.c\_Alphaproteobacteria.o\_Hyphomicrobiales.

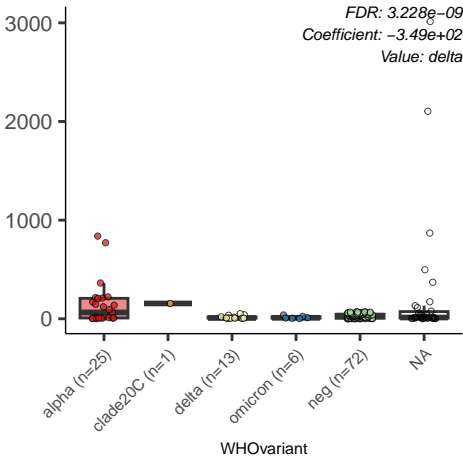

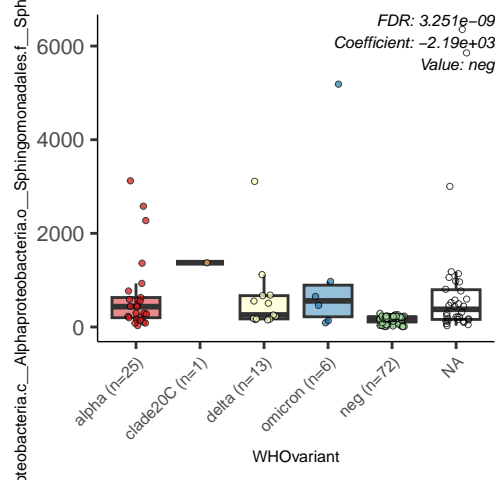

Bacteria.p\_\_Firmicutes.c\_\_Clostridia.o\_\_Eubacteriales.f\_\_Clostridia

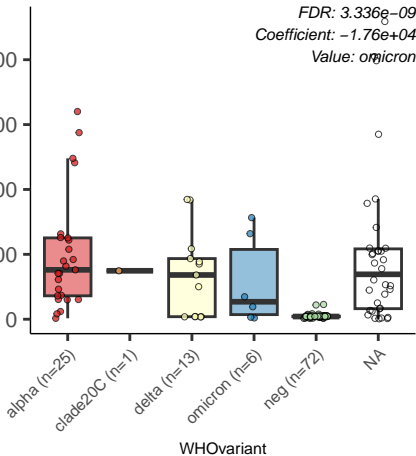

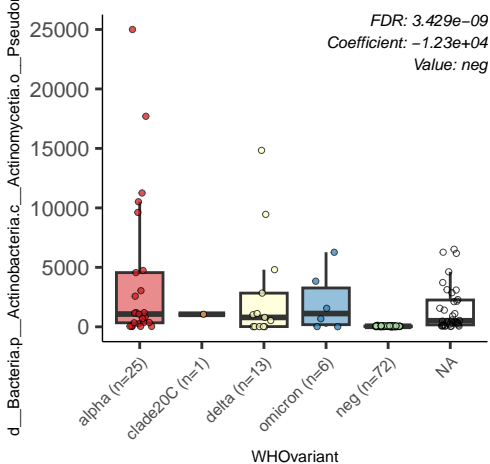

acteria.p\_Actinobacteria.c\_Actinomycetia.o\_Pseudonocardiales.f

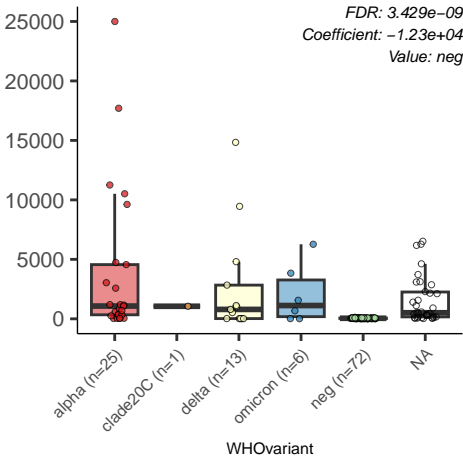

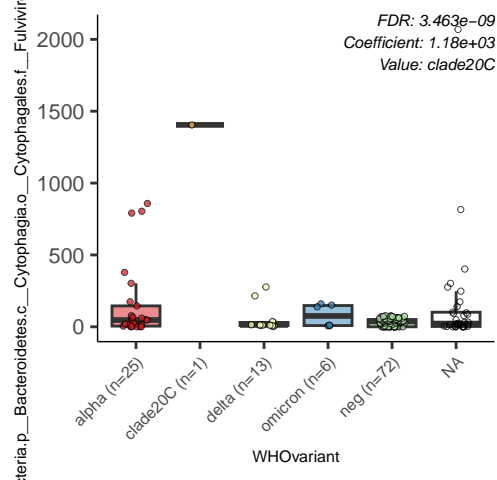

acteroidetes.c\_\_Cytophagia.o\_\_Cytophagales.f\_\_Fulvvirgaceae.g

*FDR:  $3.463e-09$*   
*Coefficient:  $1.18e+03$*   
*Value: clade20C*

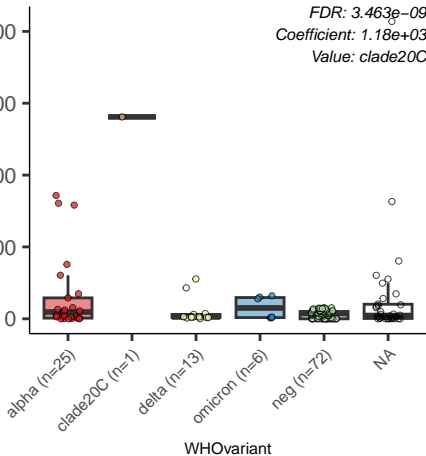

bacteria.p\_\_Proteobacteria.c\_\_Alphaproteobacteria.o\_\_Hyphomicrob

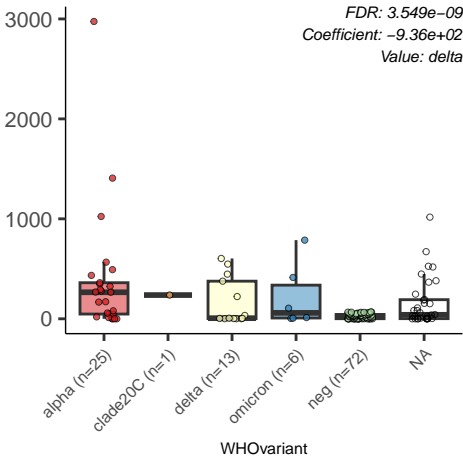



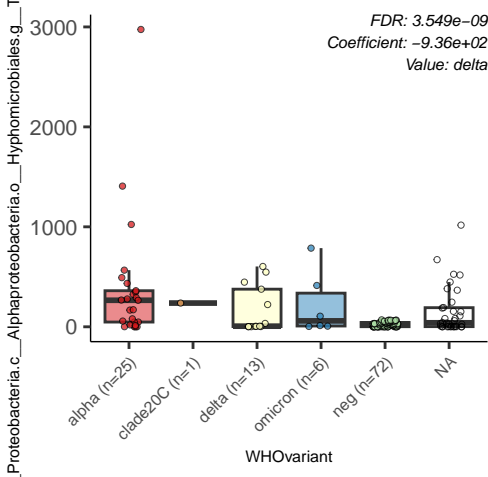

\_\_Bacteria.p\_\_Firmicutes.c\_\_Bacilli.o\_\_Bacillales.f\_\_Planococcaceae

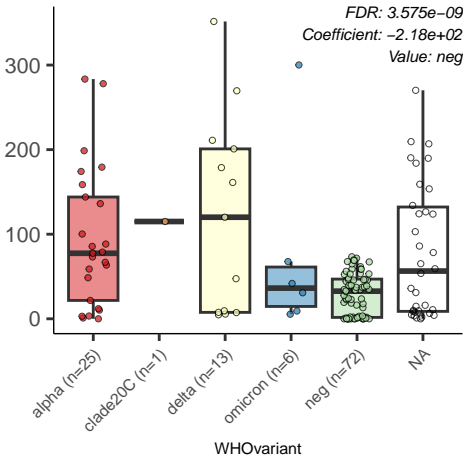

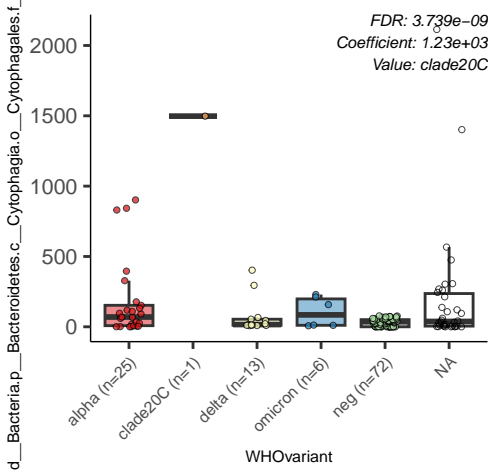

cteria.p\_\_Firmicutes.c\_\_Clostridia.o\_\_Eubacteriales.f\_\_Oscillospira

*FDR: 3.791e-09*  
*Coefficient: -1.00e+03*  
*Value: neg*

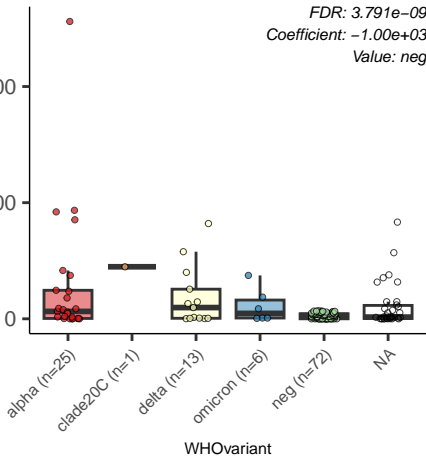

icutes.c\_\_Clostridia.o\_\_Eubacteriales.f\_\_Oscillospiraceae.g\_\_Magne

*FDR: 3.791e-09*  
*Coefficient: -1.00e+03*  
*Value: neg*

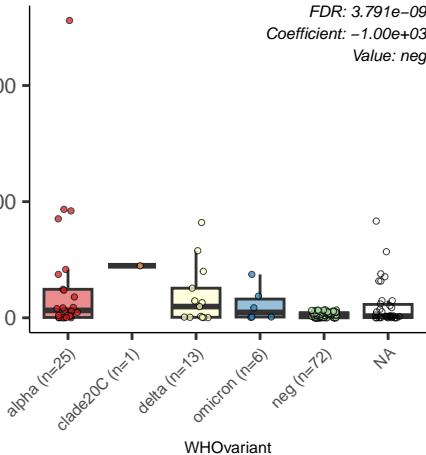

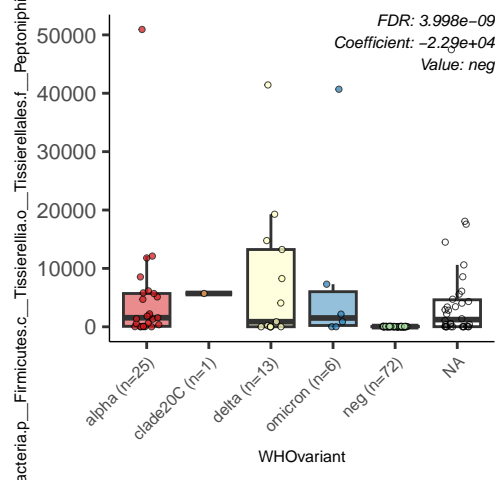

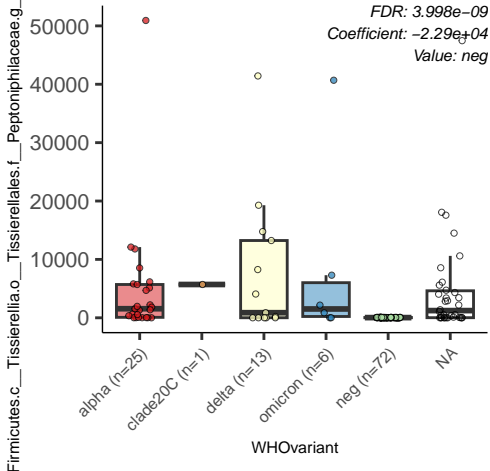

micutes.c\_\_Clostridia.o\_\_Eubacteriales.f\_\_Oscillospiraceae.g\_\_Ru

*FDR: 3.998e-09*  
*Coefficient: -1.20e+03*  
*Value: neg*

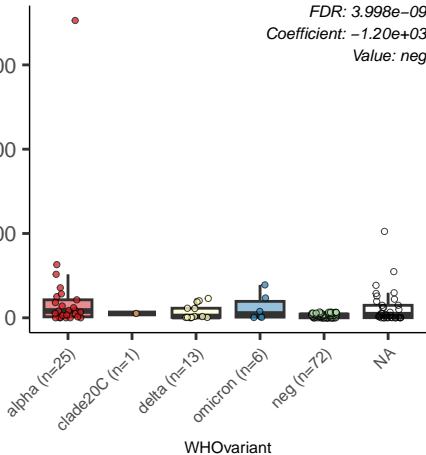



Bacteria.p\_\_Proteobacteria.c\_\_Betaproteobacteria.o\_\_Burkholderia

FDR:  $4.042 \times 10^{-9}$   
Coefficient:  $-9.13 \times 10^2$   
Value: delta

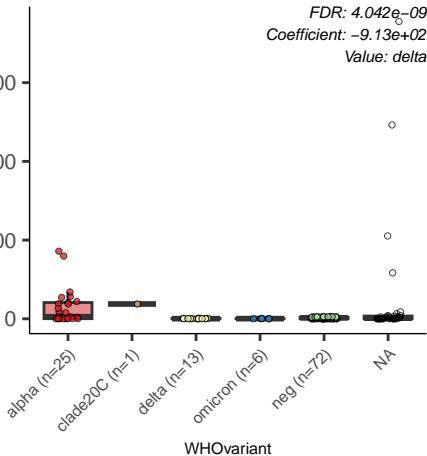

Proteobacteria.c\_\_Betaproteobacteria.o\_\_Burkholderiales.g\_\_Ideo

FDR:  $4.042e-09$   
Coefficient:  $-9.13e+02$   
Value: delta

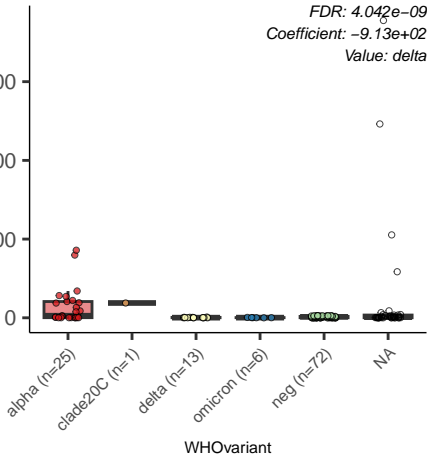

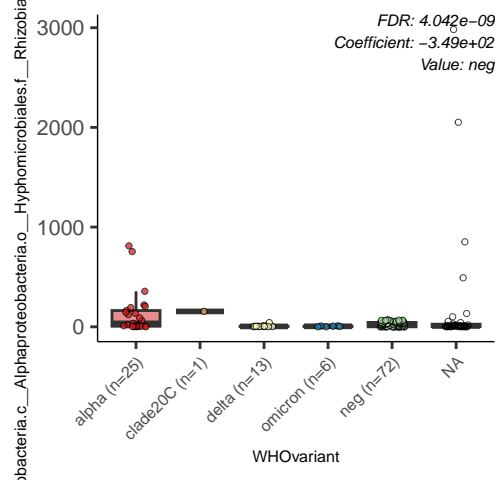

terial.c\_\_Betaproteobacteria.o\_\_Burkholderiales.f\_\_Alcaligenaceae.g\_\_

FDR:  $4.077 \times 10^{-9}$   
Coefficient:  $-9.79 \times 10^2$   
Value: delta

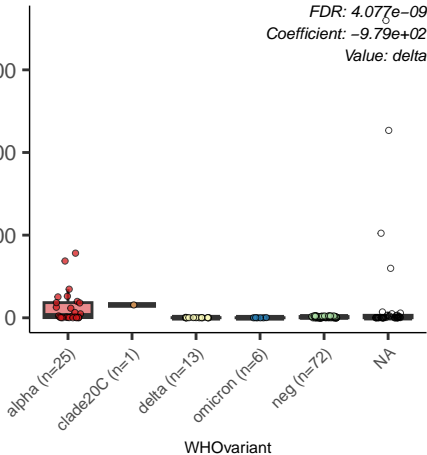

obacteria.c\_\_Betaproteobacteria.o\_\_Burkholderiales.f\_\_Comamonad

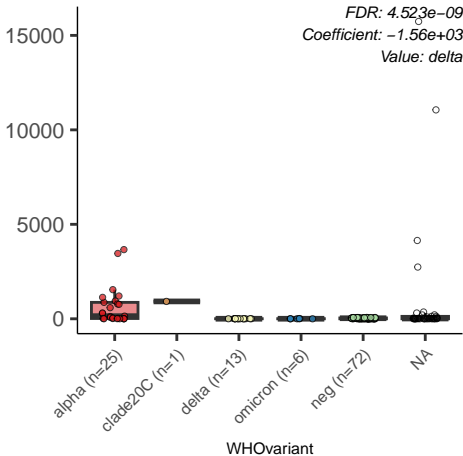

d\_Bacteria.p\_Firmicutes.c\_Bacilli.o\_Bacillales.f\_Listeriace

FDR:  $4.648e-09$   
Coefficient:  $-7.30e+02$   
Value: neg

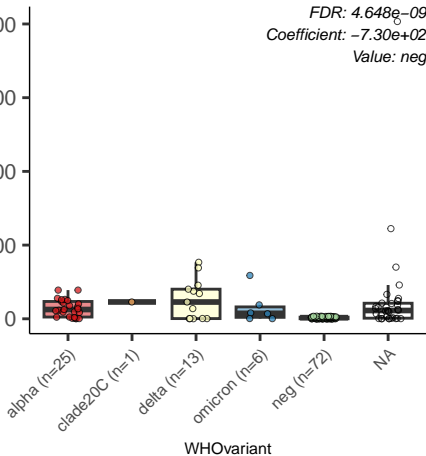

Firmicutes.c\_\_Clostridia.o\_\_Eubacteriales.f\_\_Clostridiaceae.g\_\_Clo

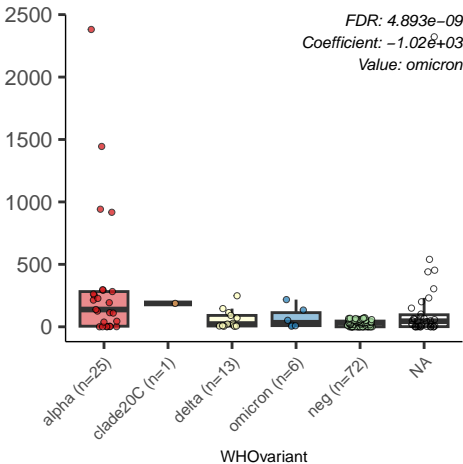

acteria.p\_\_Firmicutes.c\_\_Clostridia.o\_\_Eubacteriales.f\_\_Lachnospira

FDR:  $5.178e-09$   
Coefficient:  $-3.04e+03$   
Value: neg

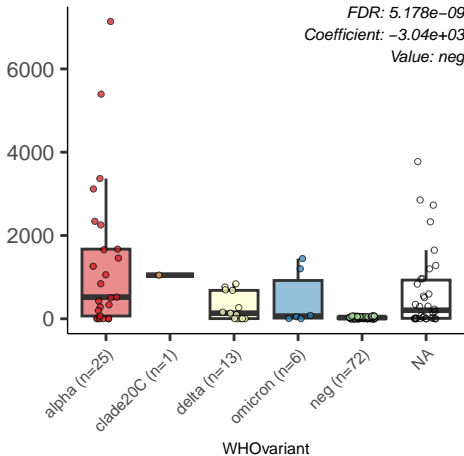



.p\_\_Verrucomicrobia.c\_\_Opitutae.o\_\_Puniceicoccales.f\_\_Puniceico

FDR:  $5.386e-09$   
Coefficient:  $-7.18e+02$   
Value: neg

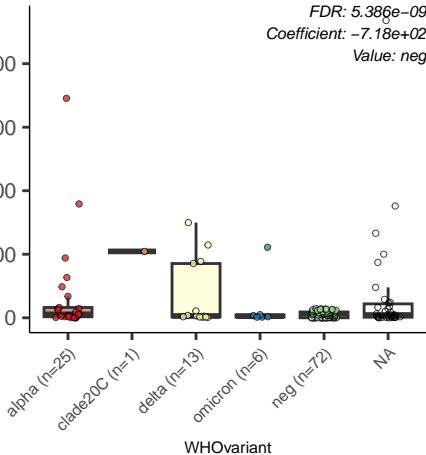

obia.c\_\_Opitutae.o\_\_Puniceicoccales.f\_\_Puniceicoccaceae.g\_\_Corr

FDR:  $5.386e-09$   
Coefficient:  $-7.18e+02$   
Value: neg

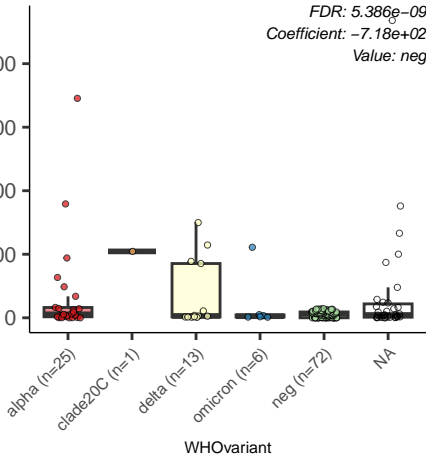

\_\_Bacteria.p\_\_Proteobacteria.c\_\_Betaproteobacteria.o\_\_Burkholder

FDR:  $5.399e-09$   
Coefficient:  $-9.99e+02$   
Value: delta

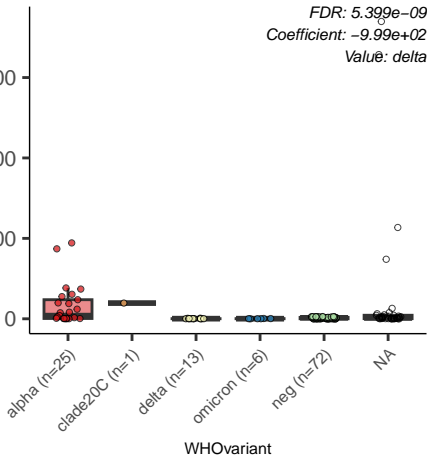

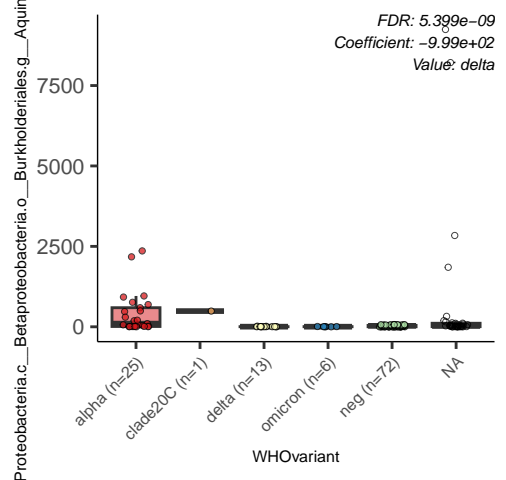

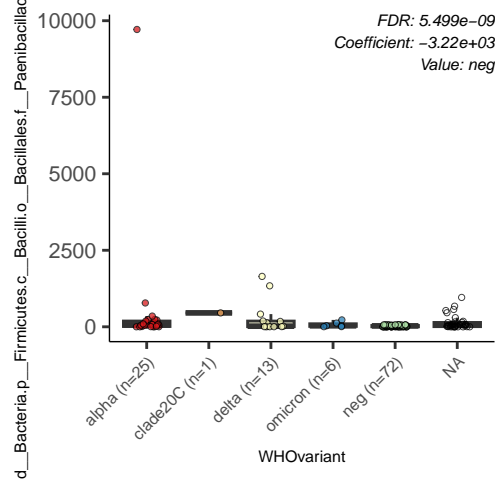

Proteobacteria.c\_\_Alphaproteobacteria.o\_\_Hyphomicrobiales.f\_\_Nit

$FDR: 5.692e-09$   
 $Coefficient: -3.12e+03$   
 $Value: delta$

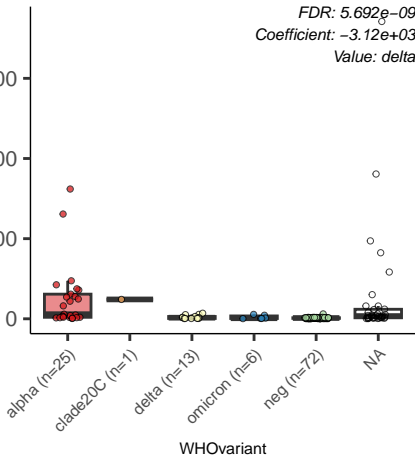

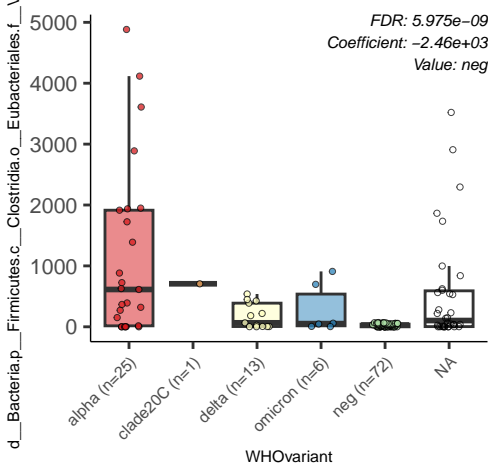

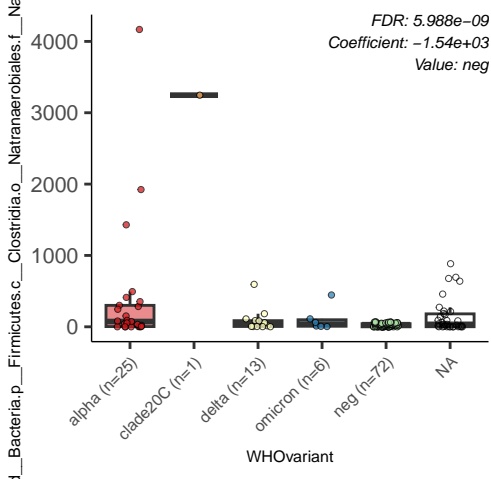



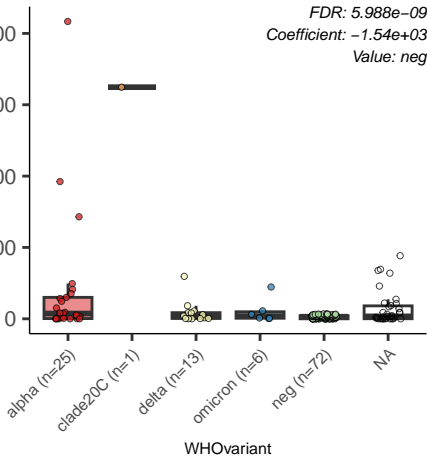

c\_\_Clostridia.o\_\_Natranaerobiales.f\_\_Natranaerofabaceae.g\_\_Natra

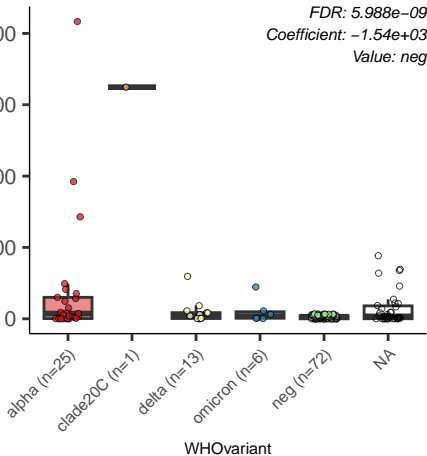

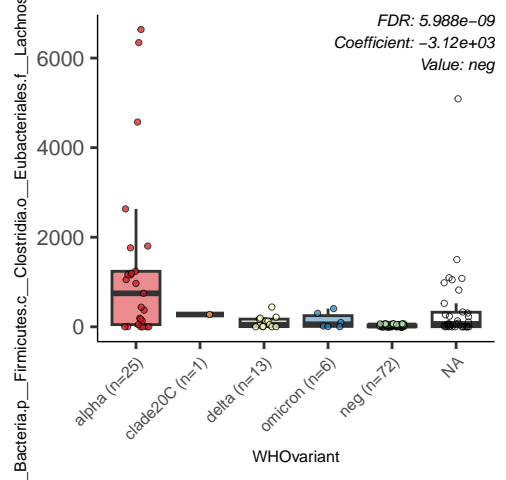

Firmicutes.c\_\_Clostridia.o\_\_Eubacteriales.f\_\_Lachnospiraceae.g

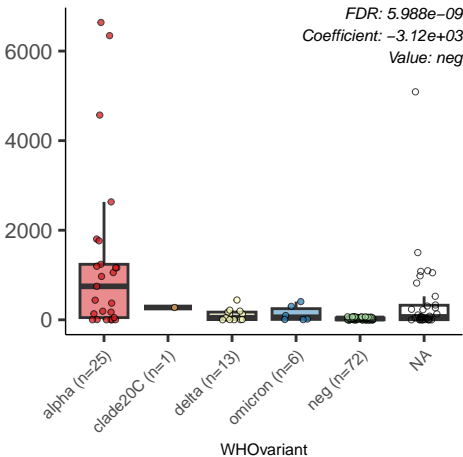

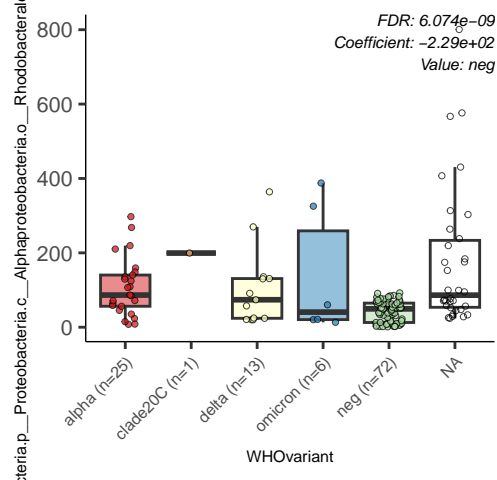

Bacteria.p\_\_Firmicutes.c\_\_Clostridia.o\_\_Eubacteriales.f\_\_Lachnos

FDR:  $6.082e-09$   
Coefficient:  $-3.34e+03$   
Value: neg

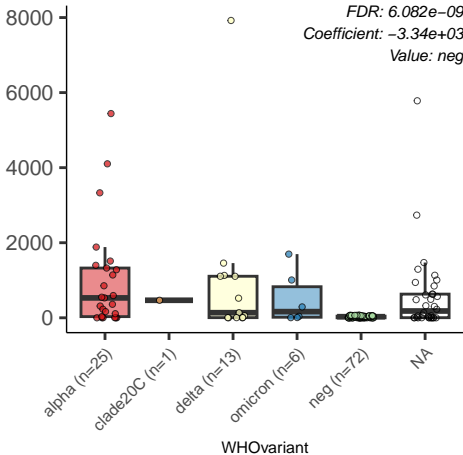

Firmicutes.c\_\_Clostridia.o\_\_Eubacteriales.f\_\_Lachnospiraceae.g

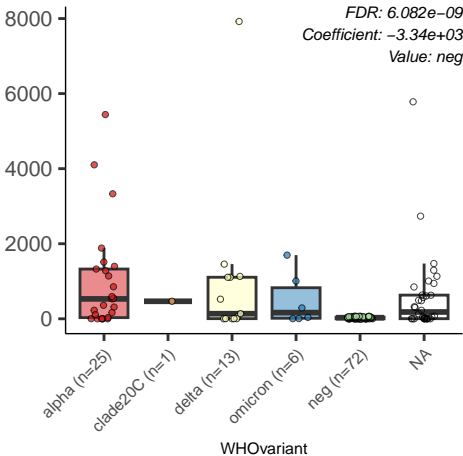

d\_\_Bacteria.p\_\_Proteobacteria.c\_\_Deltaproteobacte

FDR:  $6.083e-09$   
Coefficient:  $-5.51e+03$   
Value: neg

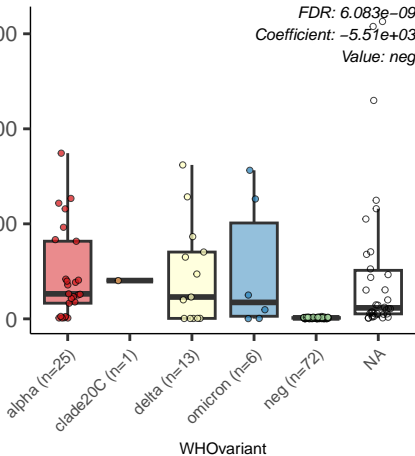



bacteria.c\_\_Actinomycetia.o\_\_Actinomycetales.f\_\_Actinomycetaceae

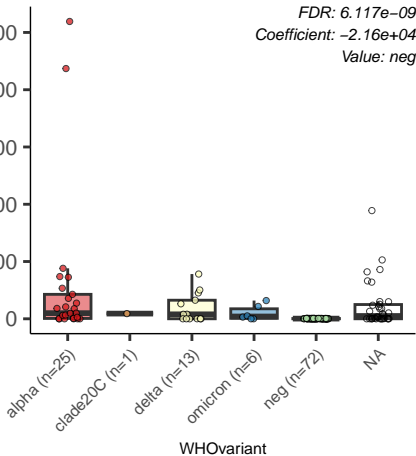

bacteria.p\_\_Proteobacteria.c\_\_Alphaproteobacteria.o\_\_Hyphomicrobia

FDR:  $6.262e-09$   
Coefficient:  $-6.86e+03$   
Value: delta

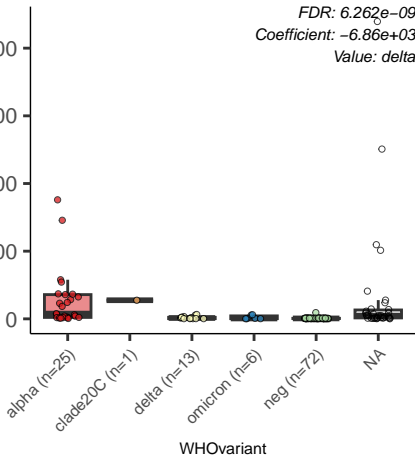

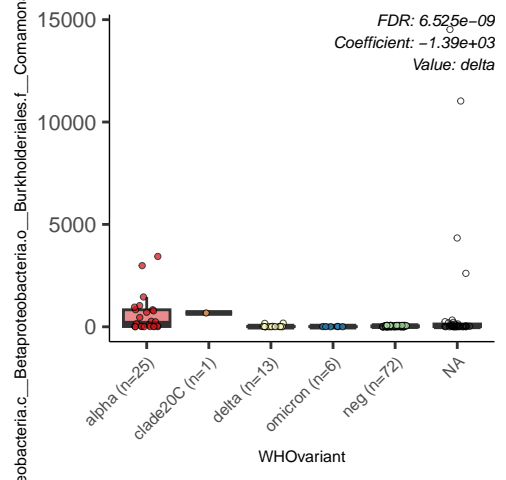

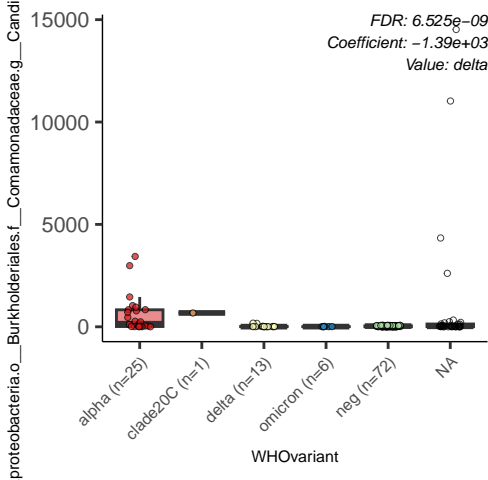

d\_Bacteria.p\_Tenericutes

FDR:  $6.678e-09$   
Coefficient:  $-2.25e+04$   
Value: neg

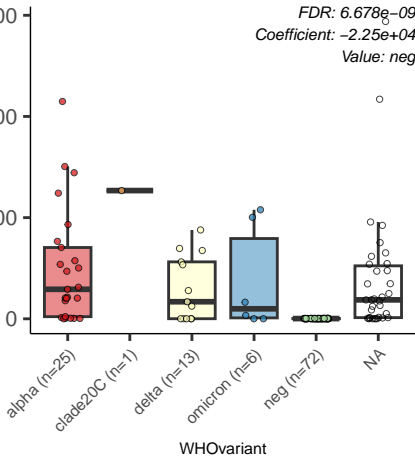

d\_Bacteria.p\_\_Planctomycetes.c\_\_Planctomycetia.o\_\_Plancto

FDR:  $6.766e-09$   
Coefficient:  $-4.97e+03$   
Value: neg

10000

5000

0

alpha (n=25)

clade20C (n=1)

delta (n=13)

omicron (n=6)

neg (n=72)

NA

WHOvariant

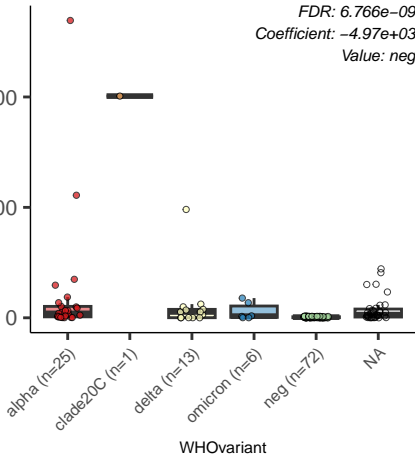

bacteria.p\_\_Planctomycetes.c\_\_Planctomycetia.o\_\_Planctomycetales

FDR:  $6.766e-09$   
Coefficient:  $-4.97e+03$   
Value: neg

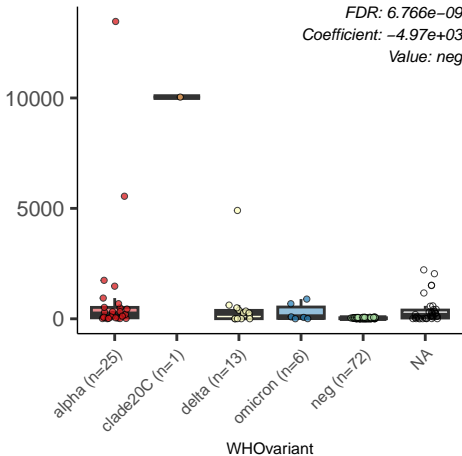

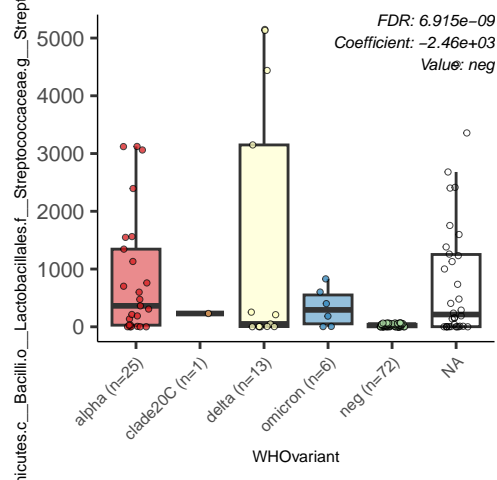



a.p\_\_Tenericutes.c\_\_Mollicutes.o\_\_Acholeplasma.f\_\_Acholeplasma

1000

500

0

alpha (n=25)

clade20C (n=1)

delta (n=13)

omicron (n=6)

neg (n=72)

NA

WHOvariant

FDR:  $6.987e-09$   
Coefficient:  $-4.65e+02$   
Value: neg

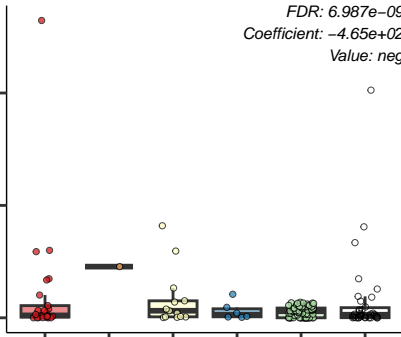

FDR:  $6.987e-09$   
Coefficient:  $-4.65e+02$   
Value: neg

1000

500

0

alpha (n=25)

clade20C (n=1)

delta (n=13)

omicron (n=6)

neg (n=72)

NA

WHOvariant

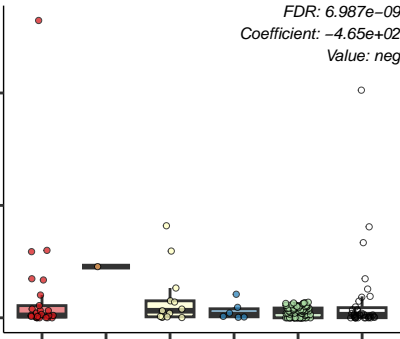

icutes.c\_\_Clostridia.o\_\_Eubacteriales.f\_\_Lachnospiraceae.g\_\_Buty

FDR:  $7.089e-09$   
Coefficient:  $-2.06e+03$   
Value: delta

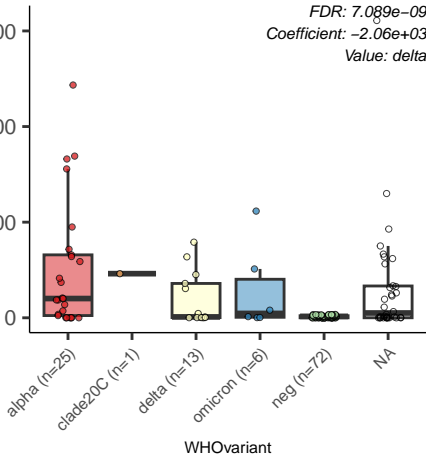

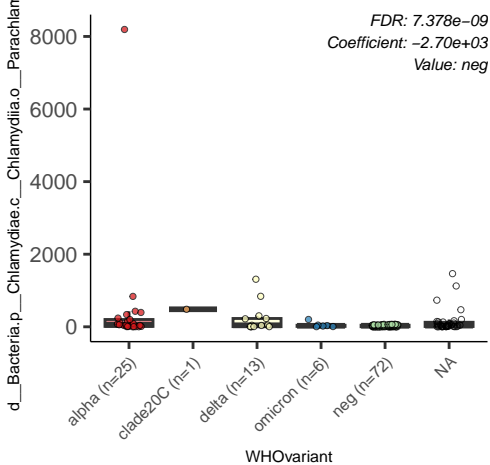

d\_\_Bacteria.p\_\_Cyanobacteria.o\_\_Pseudanabaenales.f\_\_Lept

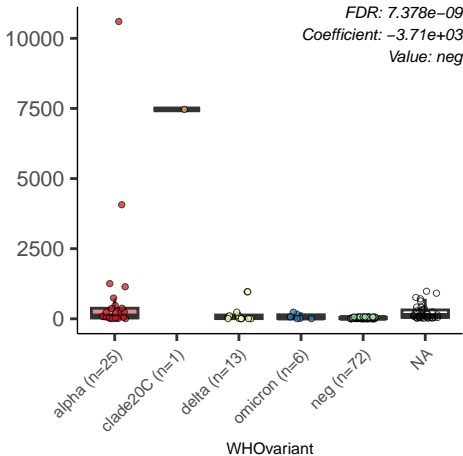

a.c.\_Thermoleophilia.o\_\_Solirubrobacterales.f\_\_Conexibacteraceae

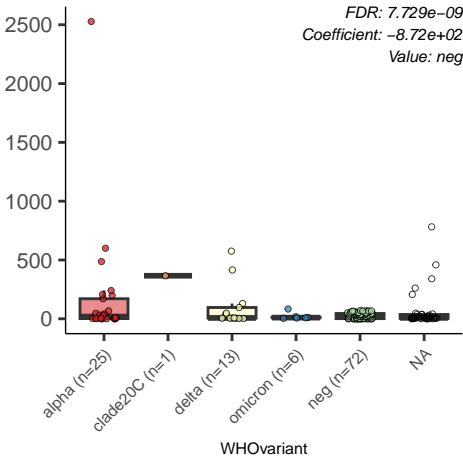

Firmicutes.c\_\_Clostridia.o\_\_Eubacteriales.f\_\_Clostridiaceae.g\_\_Clo

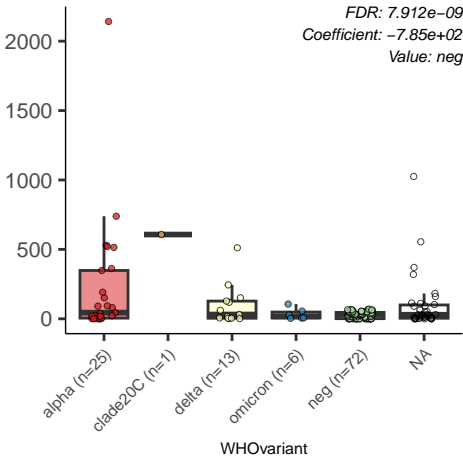

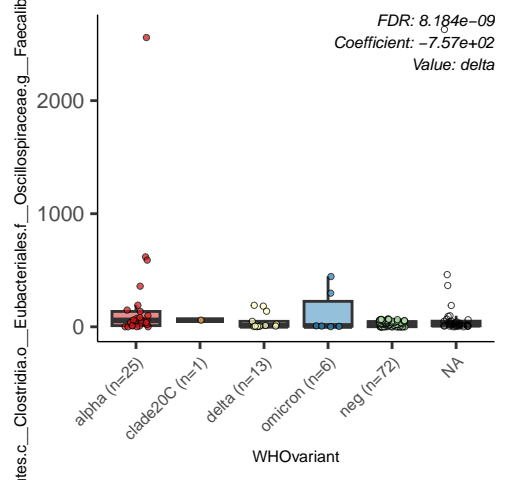



Bacteria.p\_Firmicutes.c\_Clostridia.o\_Eubacteriales.f\_Lachnosp

FDR:  $8.310e-09$   
Coefficient:  $-4.64e+03$   
Value: omicron

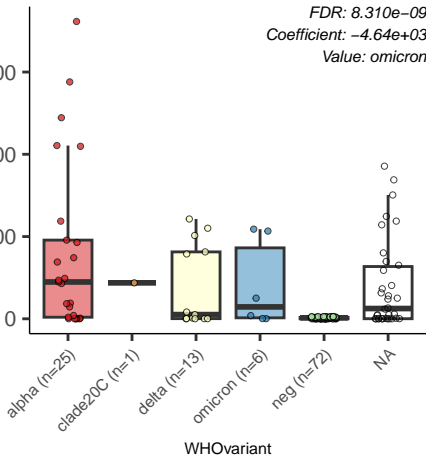

Firmicutes.c\_\_Clostridia.o\_\_Eubacteriales.f\_\_Lachnospiraceae.g\_\_

*FDR: 8.310e-09*  
*Coefficient: -4.64e+03*  
*Value: omicron*

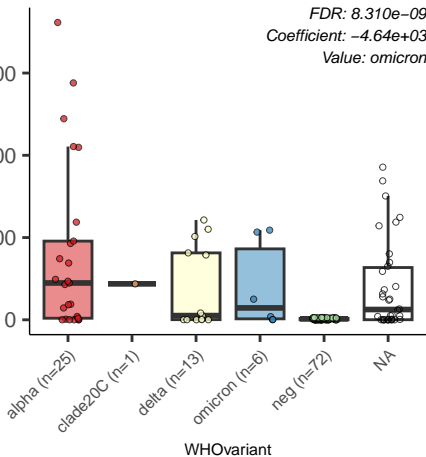

bacteria.p\_\_Proteobacteria.c\_\_Betaproteobacteria.o\_\_Burkholderiales

FDR:  $8.525e-09$   
Coefficient:  $-9.86e+02$   
Value: neg

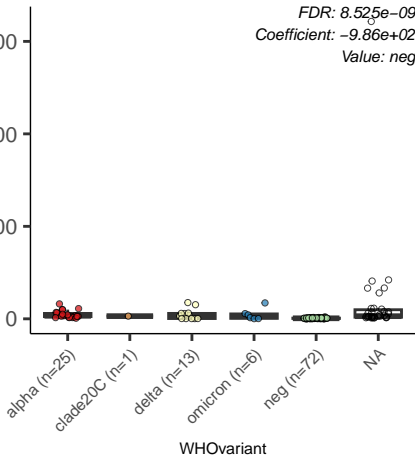

Flavobacteriia.o\_Flavobacteriales.f\_Weeksellaceae.g\_Chryse

FDR:  $8.556e-09$   
Coefficient:  $-3.25e+02$   
Value: neg

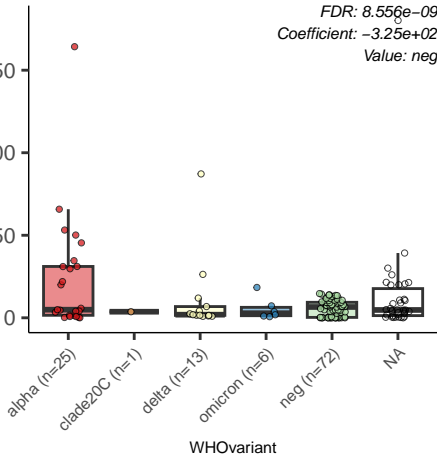

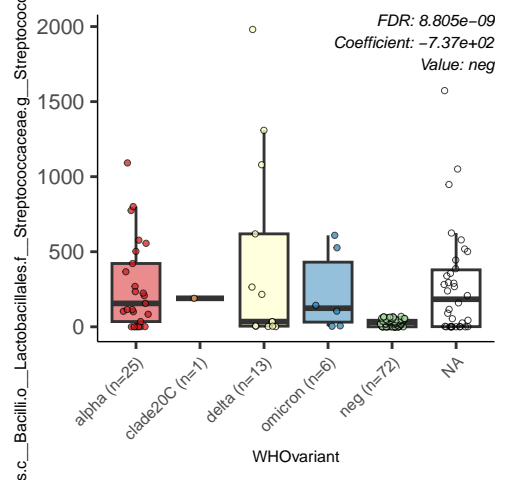

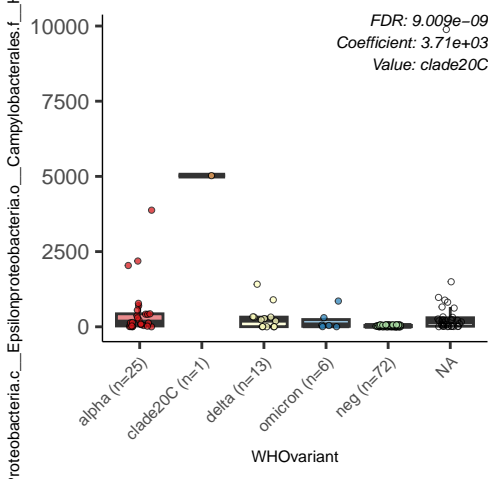

Proteobacteria.c\_\_Betaproteobacteria.o\_\_Burkholderiales.f\_\_Com

FDR:  $9.277e-09$   
Coefficient:  $-3.21e+03$   
Value: delta

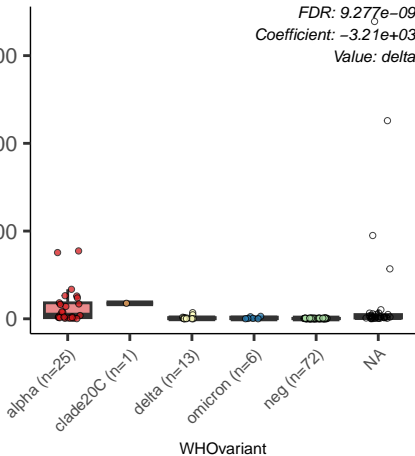

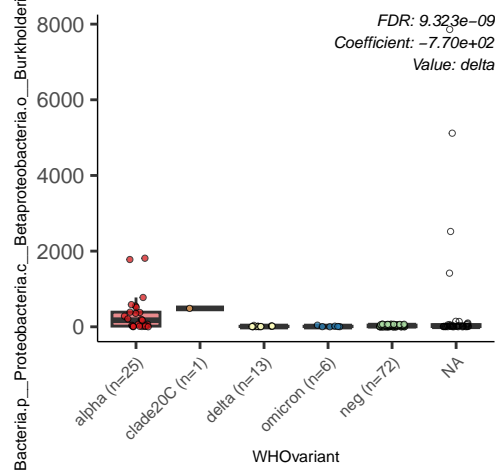



bacteria.p\_\_Cyanobacteria.o\_\_Pseudanabaenales.f\_\_Leptolyngbya

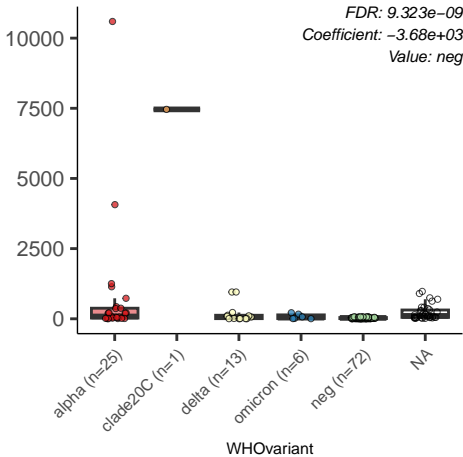

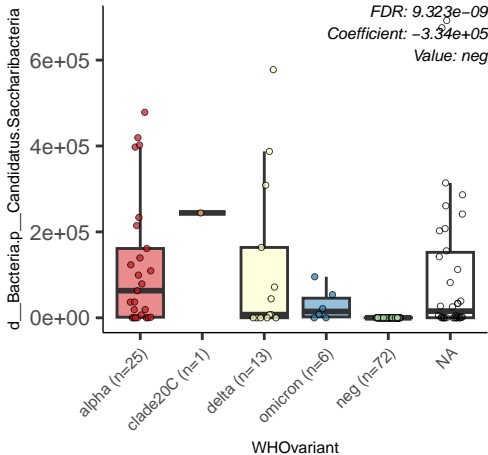

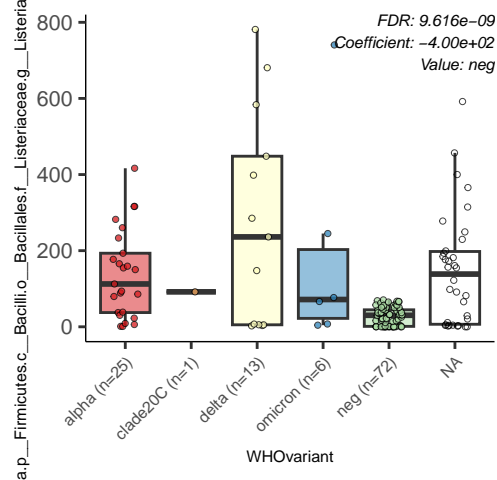

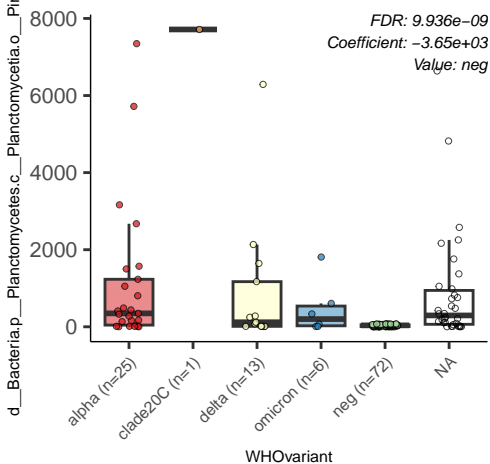

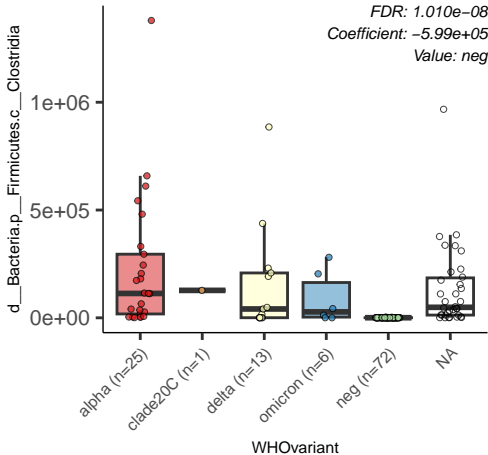

d\_Bacteria.p\_Firmicutes.c\_Clostridia.o\_Eubacteriales.g

FDR: 1.010e-08  
Coefficient: -1.22e+03  
Value: neg

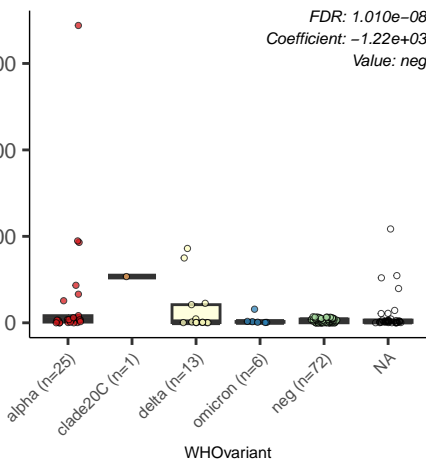

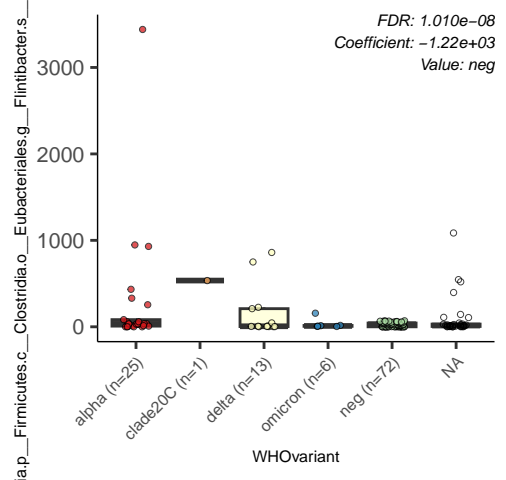

d\_\_Bacteria.p\_\_Candidatus.Saccharibacteria.c\_\_Candidatus.Sa

FDR:  $1.010e-08$   
Coefficient:  $-3.19e+05$   
Value: neg

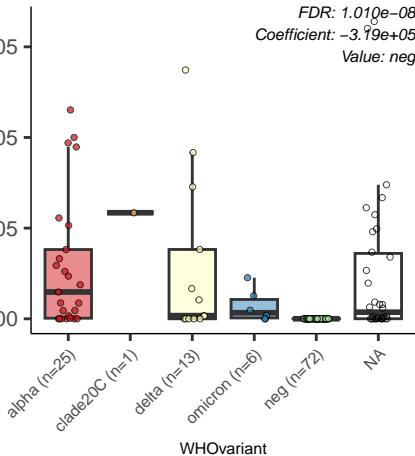



acteroidetes.c\_\_Spingobacteriia.o\_\_Spingobacteriales.f\_\_Spingob

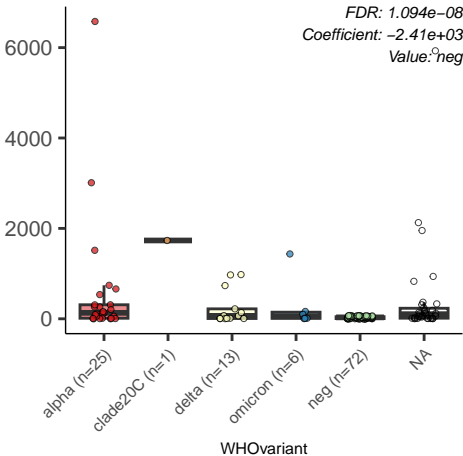

d\_\_Bacteria.p\_\_Bacteroidetes.o\_\_Candidatus.Sulfidibac

FDR:  $1.150e-08$   
Coefficient:  $-7.61e+02$   
Value: neg

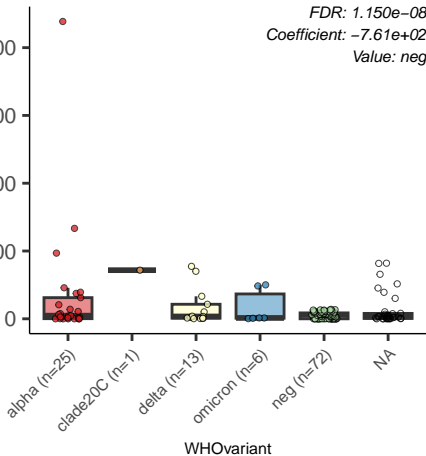

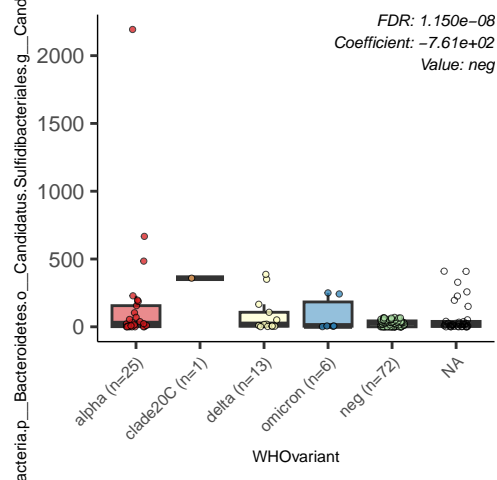

s.o\_\_\_Candidatus.Sulfidibacteriales.g\_\_\_Candidatus.Sulfidibacterium.

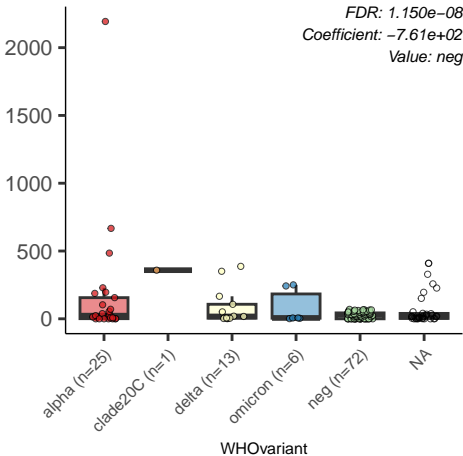

eria.p\_\_Proteobacteria.c\_\_Epsilonproteobacteria.o\_\_Campylobacter

FDR:  $1.163 \times 10^{-8}$   
Coefficient:  $3.70 \times 10^3$   
Value: clade20C

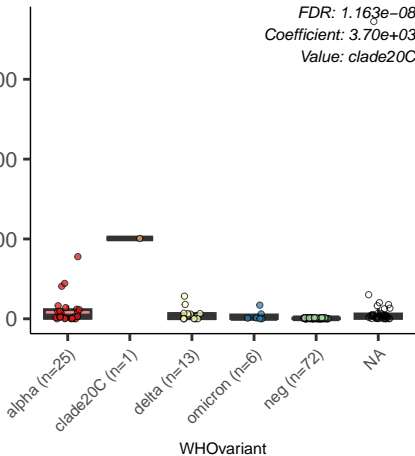

Proteobacteria.c\_\_Betaproteobacteria.o\_\_Burkholderiales.f\_\_Cor

FDR:  $1.191e-08$   
Coefficient:  $-7.93e+02$   
Value: delta

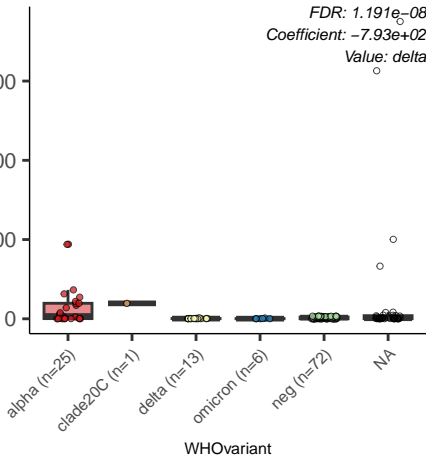

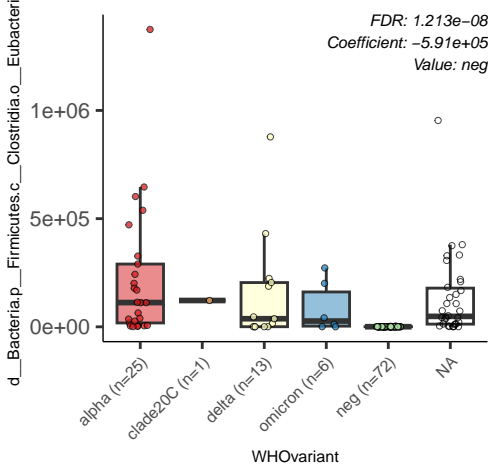

Betaproteobacteria.o\_\_Burkholderiales.f\_\_Comamonadaceae.g

FDR:  $1.288e-08$   
Coefficient:  $-7.79e+02$   
Value: delta

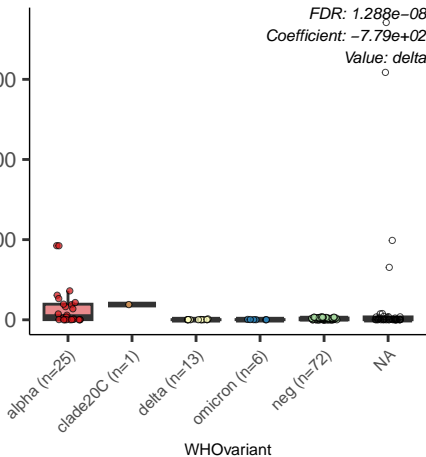



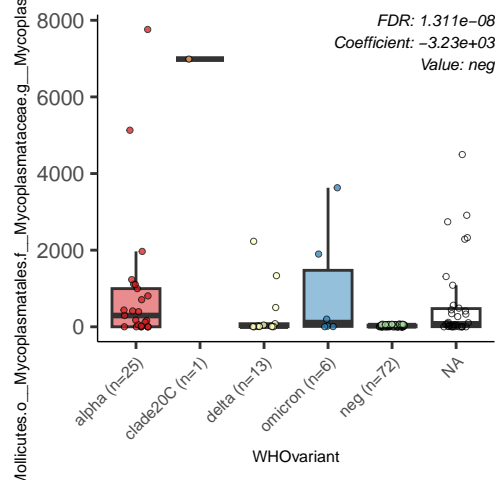

*FDR: 1.311e-08*  
*Coefficient: -1.36e+03*  
*Value: neg*

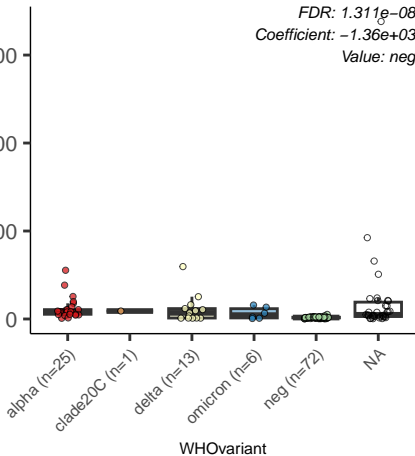

d\_Bacteria.p\_\_Chlorobi

FDR: 1.317e-08

Coefficient: -3.09e+03

Value: neg

alpha (n=25)

clade20C (n=1)

delta (n=13)

omicron (n=6)

neg (n=72)

NA

WHOvariant

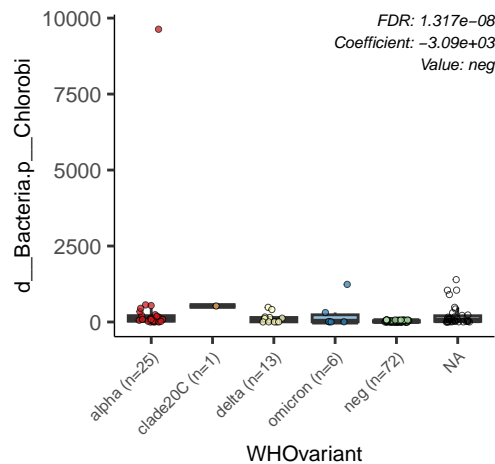

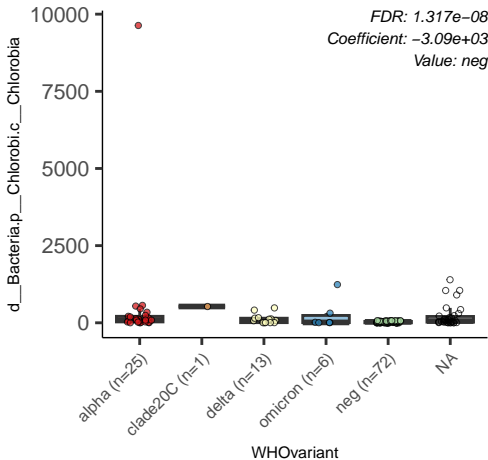

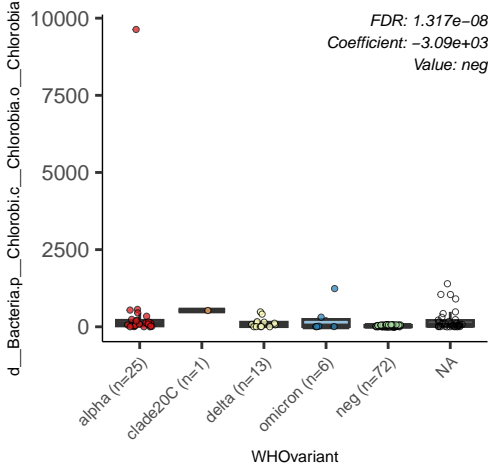

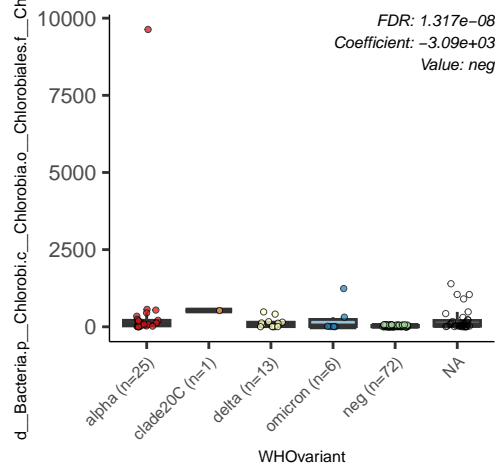

ia.p\_\_Actinobacteria.c\_\_Actinomycetia.o\_\_Micrococcales.f\_\_Micro

*FDR: 1.366e-08*  
*Coefficient: -3.05e+03*  
*Value: neg*

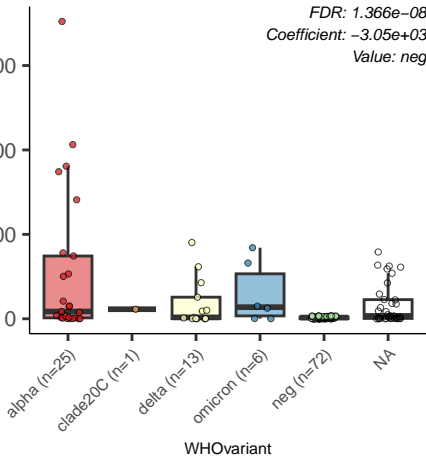

eria.c\_Actinomycetia.o\_Micrococcales.f\_Micrococcaceae.g\_Au

FDR:  $1.366e-08$   
Coefficient:  $-3.05e+03$   
Value: neg

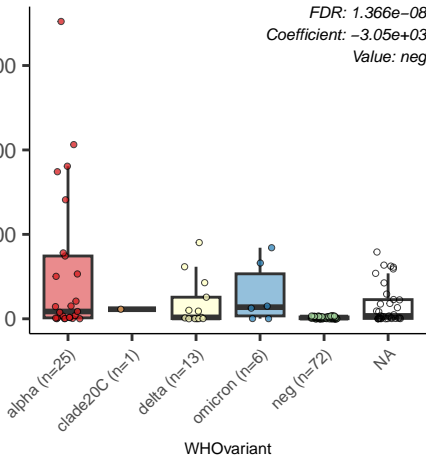



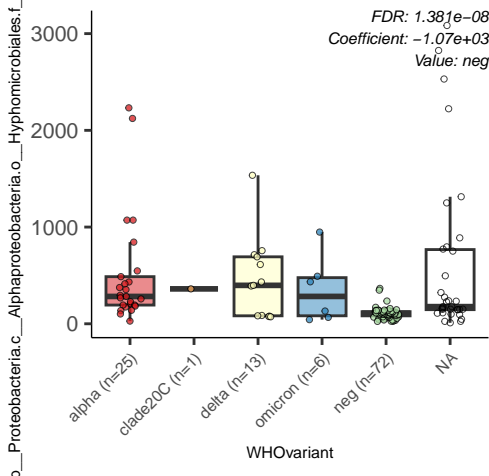

irmicutes.c\_\_Bacilli.o\_\_Lactobacillales.f\_\_Lactobacillaceae.g\_\_Lact

*FDR: 1.544e-08*  
*Coefficient: -1.30e+03*  
*Value: neg*

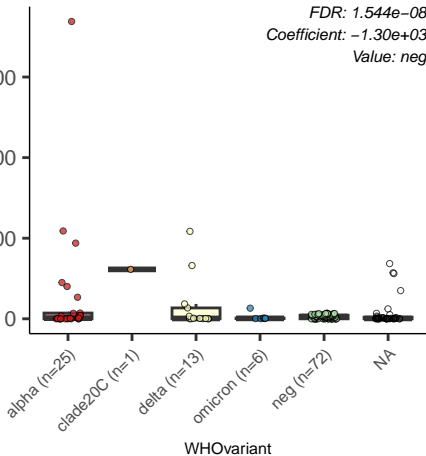

d\_\_Bacteria.p\_\_Firmicutes.c\_\_Clostridia.o\_\_Thermoanaerob

FDR:  $1.586e-08$   
Coefficient:  $-1.41e+03$   
Value: neg

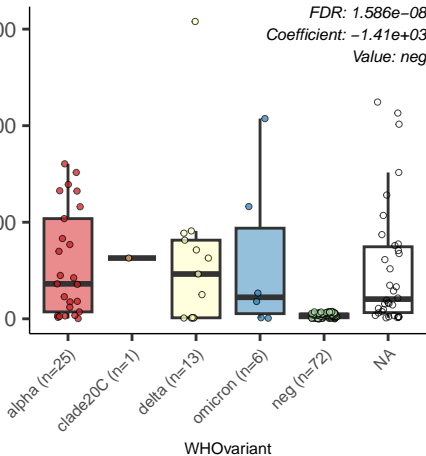

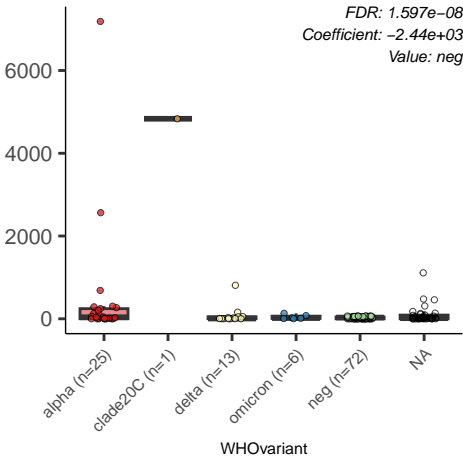

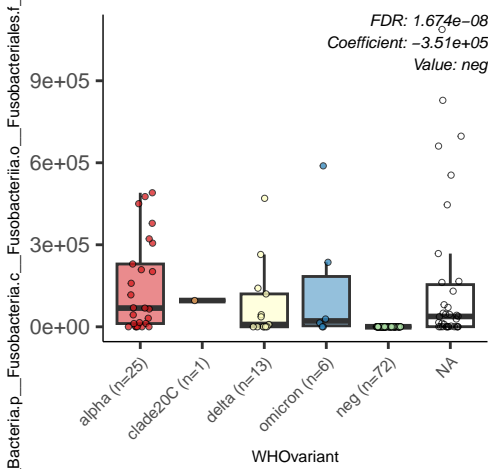

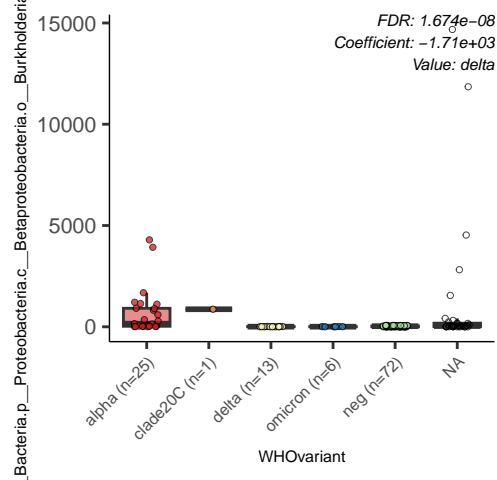

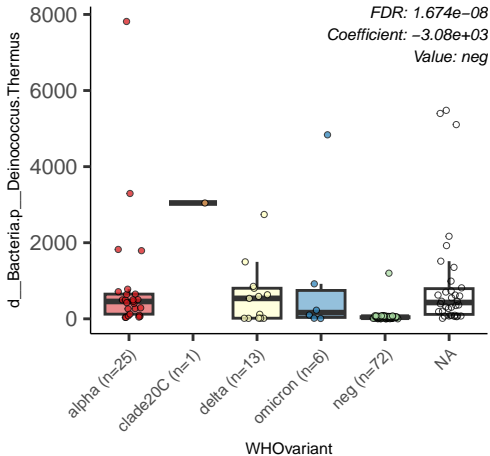

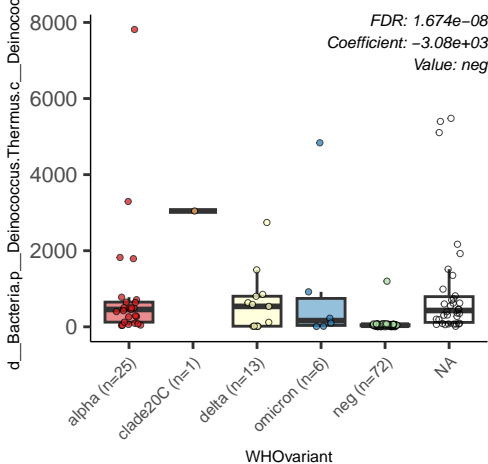



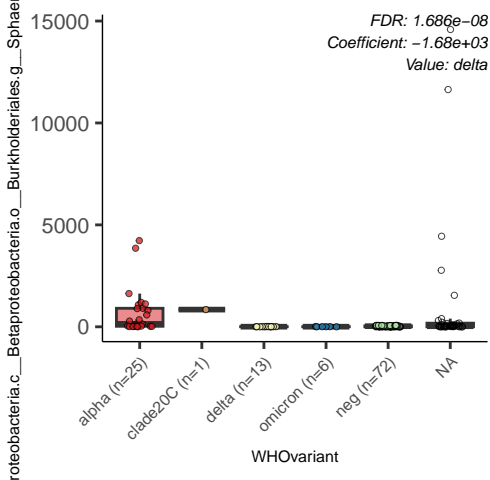

eria.p\_\_Firmicutes.c\_\_Clostridia.o\_\_Thermoanaerobacterales.f\_\_T

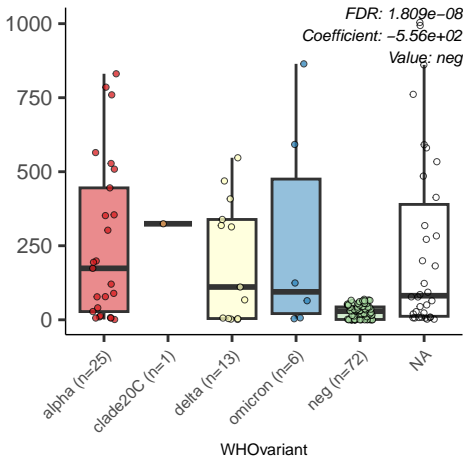

Candidatus.Saccharibacteria.c\_\_Candidatus.Saccharimonadia.o

FDR:  $1.843 \times 10^{-8}$   
Coefficient:  $-2.93 \times 10^5$   
Value: neg

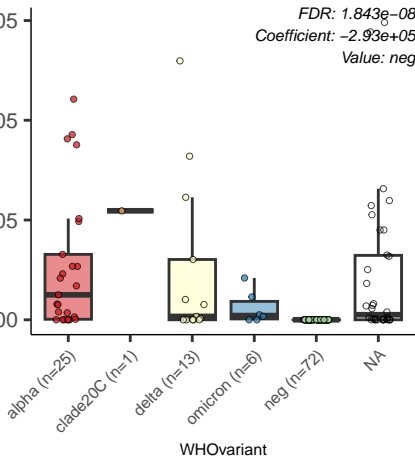

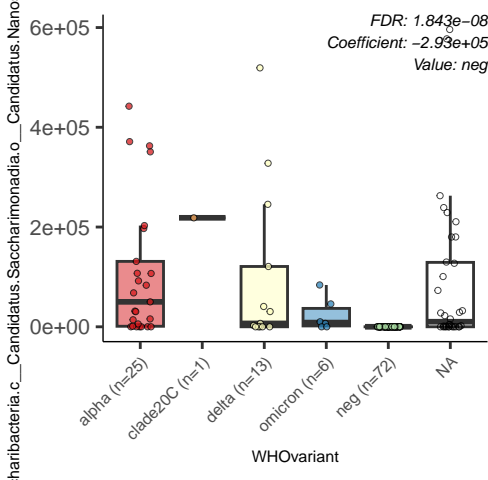

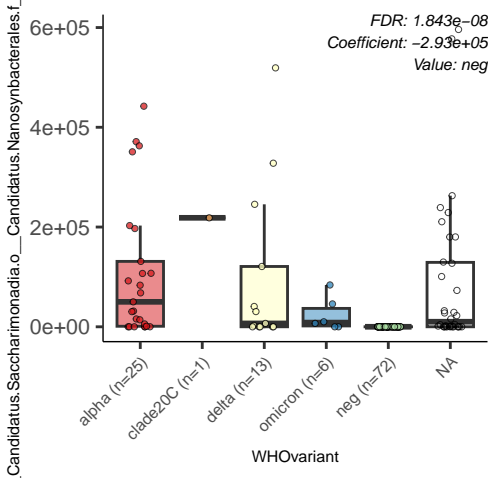

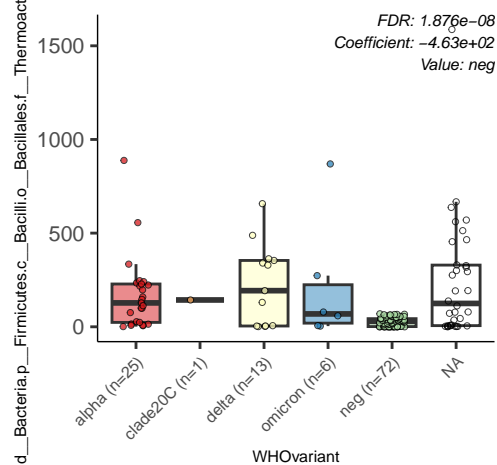

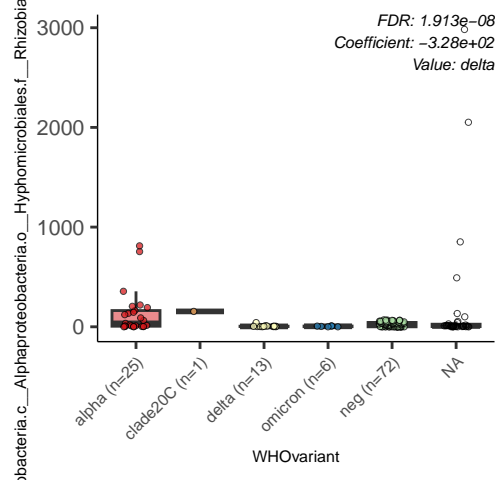

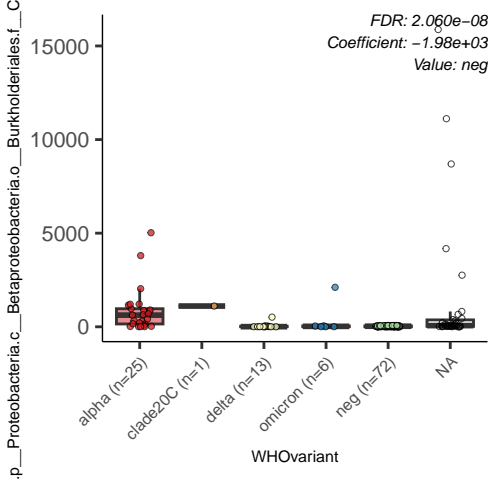



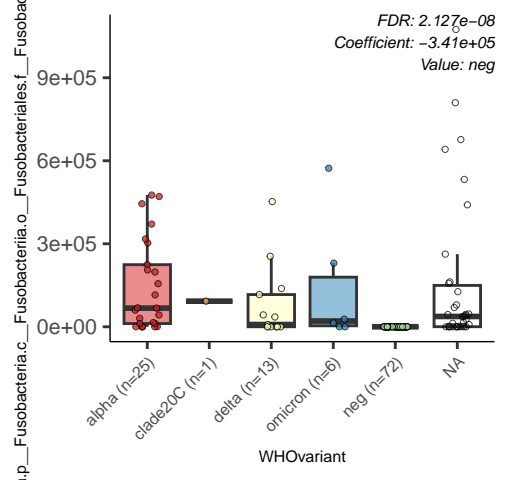

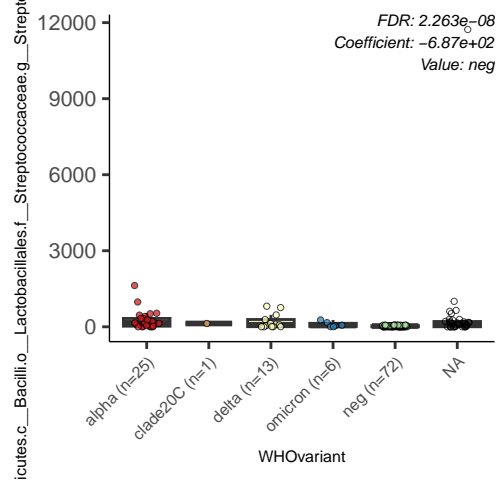

d\_Bacteria.p\_Firmicutes.c\_Clostridia.o\_Eubacteriales.f\_La

FDR:  $2.350e-08$   
Coefficient:  $-3.11e+05$   
Value: neg

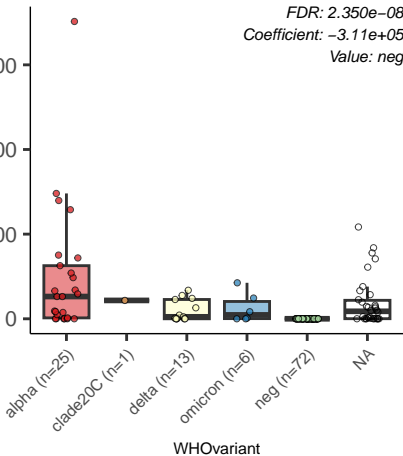

Tenericutes.c\_\_Mollicutes.o\_\_Mycoplasmatales.f\_\_Mycoplasmataceae

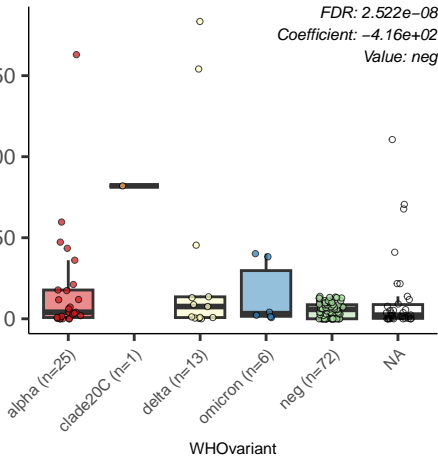

tes.o\_Mycoplasmales.f\_Mycoplasmataceae.g\_Candidatus.Hep

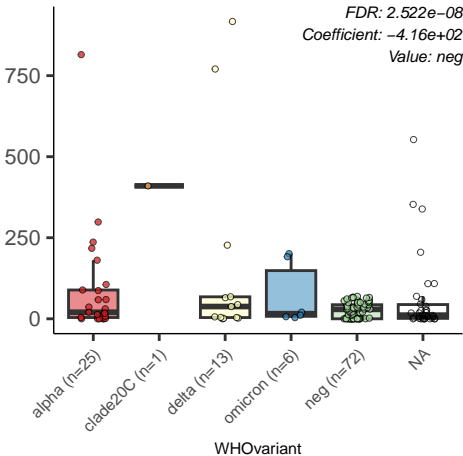

Bacteria.p\_Firmicutes.c\_Clostridia.o\_Eubacteriales.f\_Lachnosp

FDR:  $2.524e-08$   
Coefficient:  $-3.75e+03$   
Value: delta

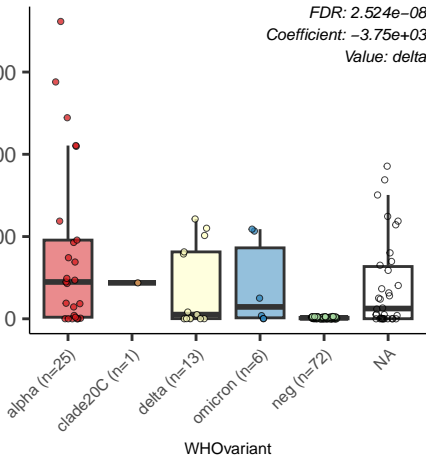

Firmicutes.c\_\_Clostridia.o\_\_Eubacteriales.f\_\_Lachnospiraceae.g\_\_

*FDR: 2.524e-08*  
*Coefficient: -3.75e+03*  
*Value: delta*

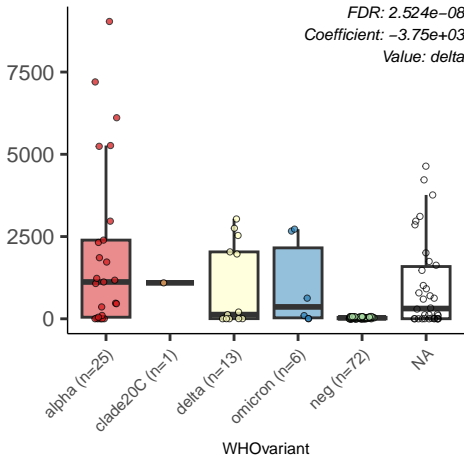

bacteria.p\_\_Firmicutes.c\_\_Clostridia.o\_\_Eubacteriales.f\_\_Lachnospir

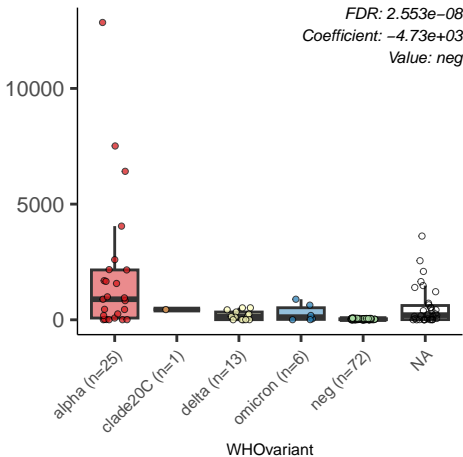



d\_Bacteria.p\_Firmicutes.c\_Clostridia.o\_Halanaero

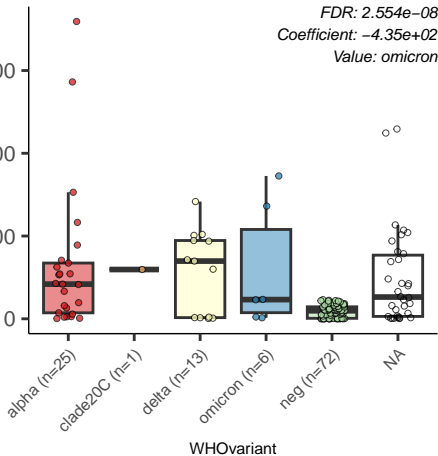

Proteobacteria.c\_\_Betaproteobacteria.o\_\_Burkholderiales.f\_\_C

FDR:  $2.611 \times 10^{-8}$   
Coefficient:  $-1.74 \times 10^2$   
Value: neg

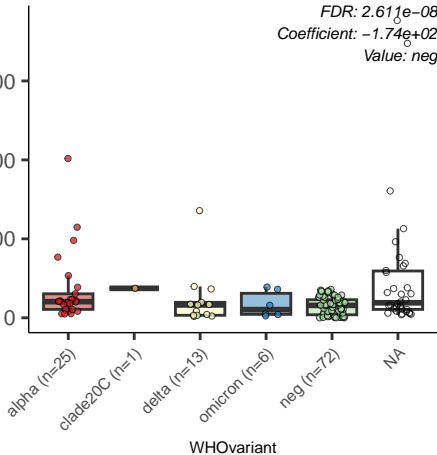

Cyanobacteria.o\_\_Pseudanabaenales.f\_\_Leptolyngbyaceae.g\_\_Lep

*FDR: 2.611e-08*  
*Coefficient: -3.58e+03*  
*Value: neg*

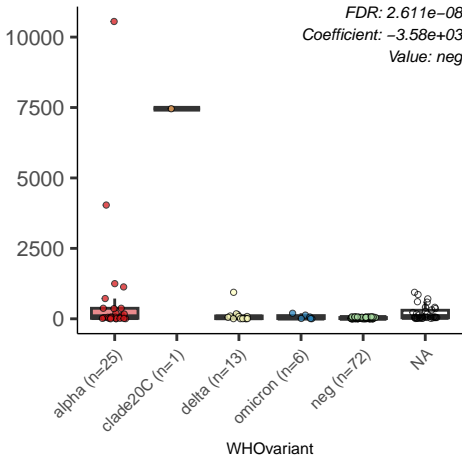

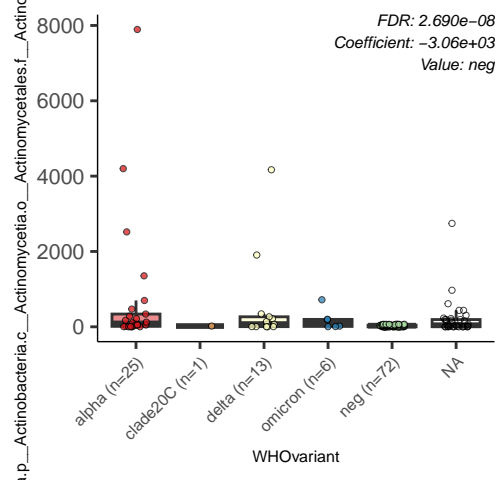

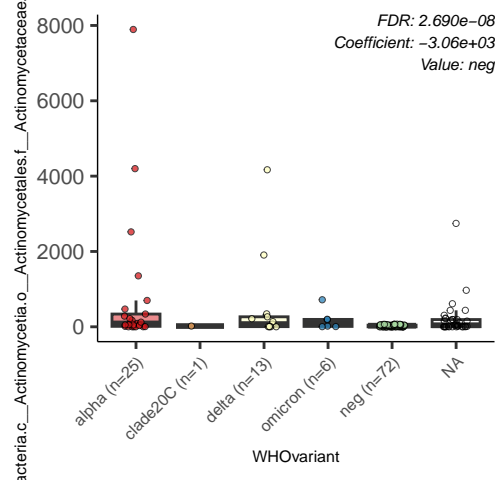

nicutes.c\_\_Bacilli.o\_\_Lactobacillales.f\_\_Streptococcaceae.g\_\_Strep

*FDR: 2.718e-08*  
*Coefficient: -5.72e+03*  
*Value: neg*

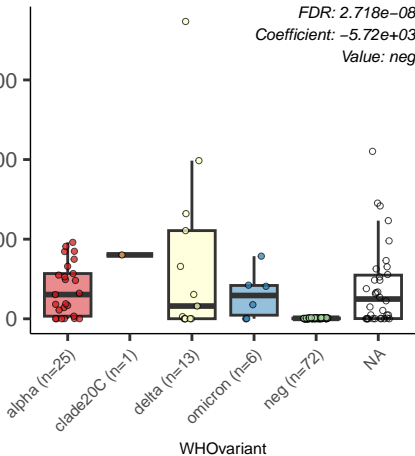



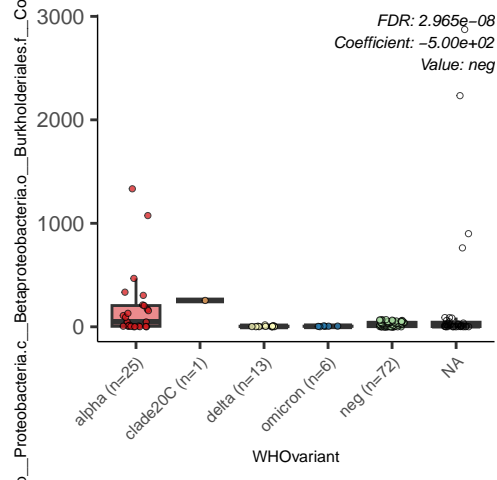



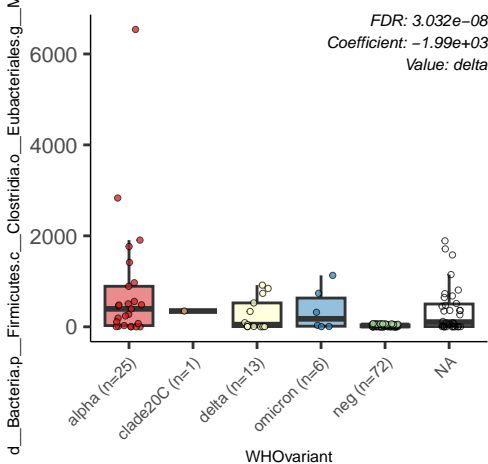

u.p\_\_Firmicutes.c\_\_Clostridia.o\_\_Eubacteriales.g\_\_Massilistercora.s

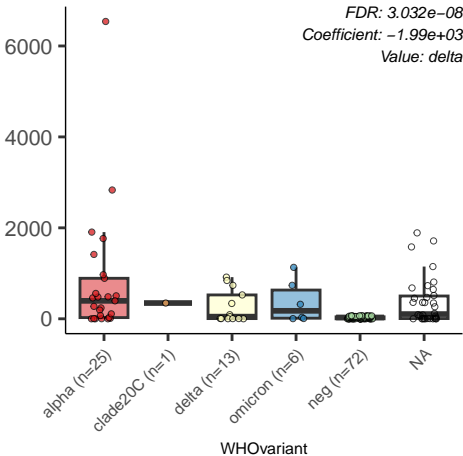

d\_Bacteria.p\_Firmicutes.c\_Bacilli.o\_Bacillales.f\_Bacillaceae

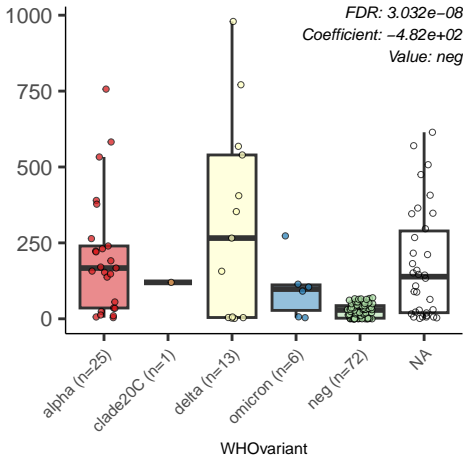

d\_Bacteria.p\_Fusobacteria

FDR:  $3.183 \times 10^{-8}$   
Coefficient:  $-8.32 \times 10^5$   
Value: neg

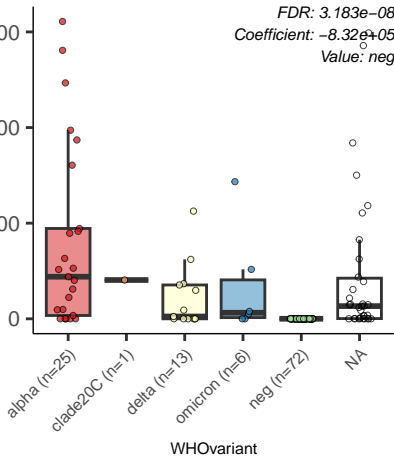

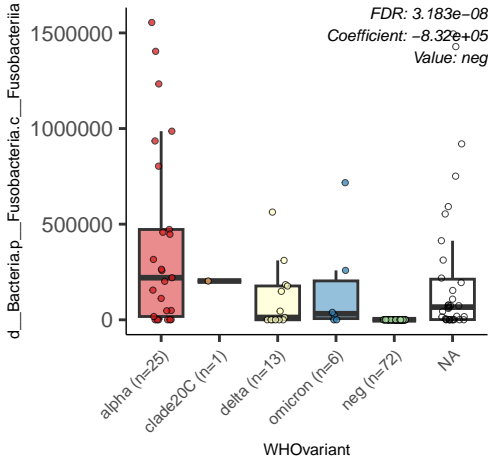

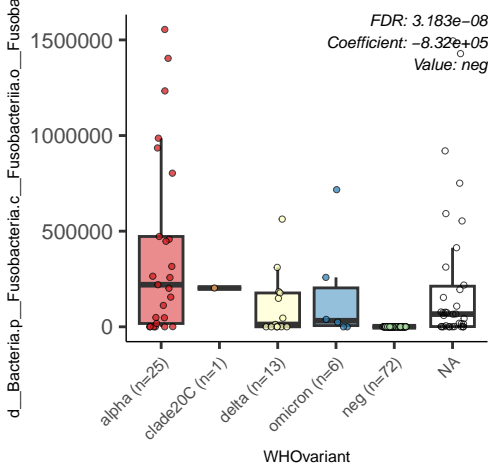

p\_\_Planctomycetes.c\_\_Planctomycetia.o\_\_Planctomycetales.f\_\_Pla

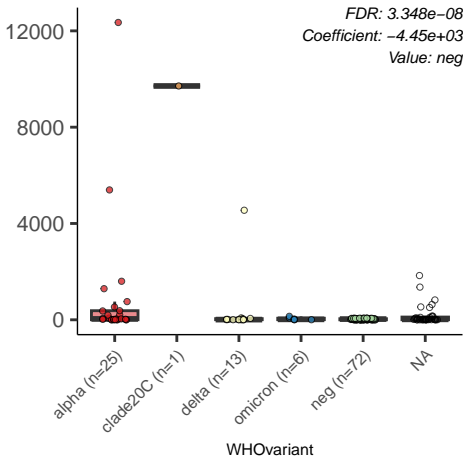

icutes.c\_\_Clostridia.o\_\_Eubacteriales.f\_\_Lachnospiraceae.g\_\_Buty

FDR:  $3.702e-08$   
Coefficient:  $-2.32e+03$   
Value: omicron

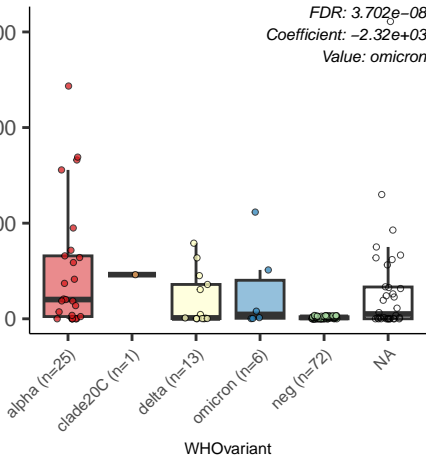



Actinomycetia.o\_Pseudonocardiales.f\_Pseudonocardaceae.g

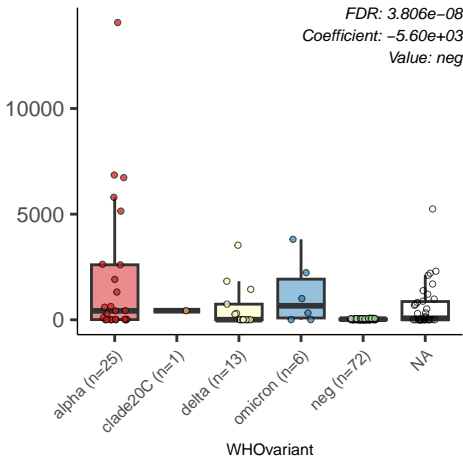

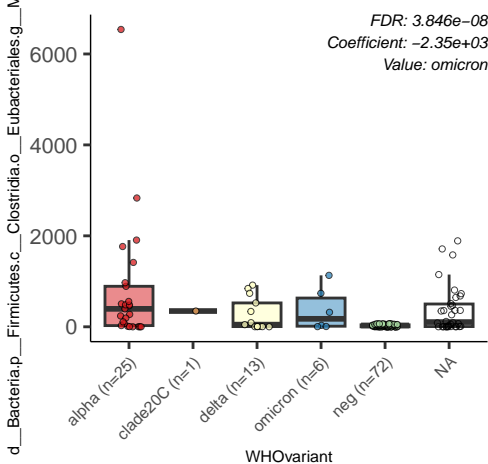

u.p\_\_Firmicutes.c\_\_Clostridia.o\_\_Eubacteriales.g\_\_Massilistercora.s

FDR:  $3.846e-08$   
Coefficient:  $-2.35e+03$   
Value: omicron

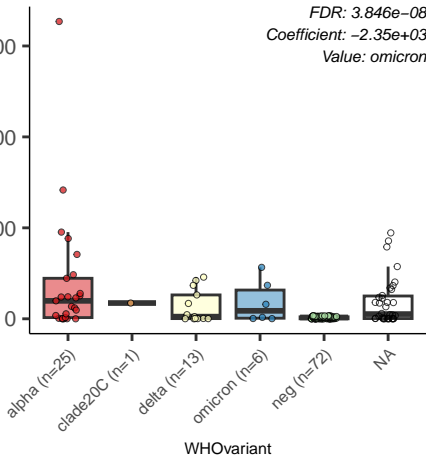

etes.c\_Flavobacteriia.o\_Flavobacteriales.f\_Flavobacteriaceae.g

FDR:  $4.013e-08$   
Coefficient:  $-8.62e+03$   
Value: neg

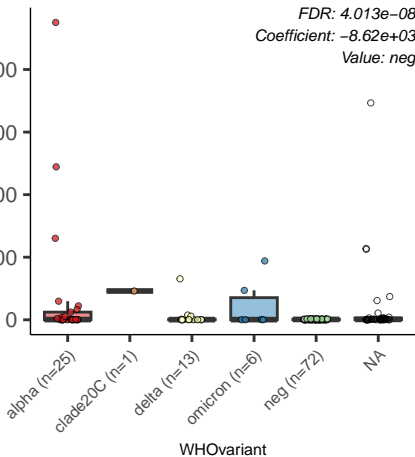

omyces.c\_\_Planctomycetia.o\_\_Planctomycetales.f\_\_Planctomycet

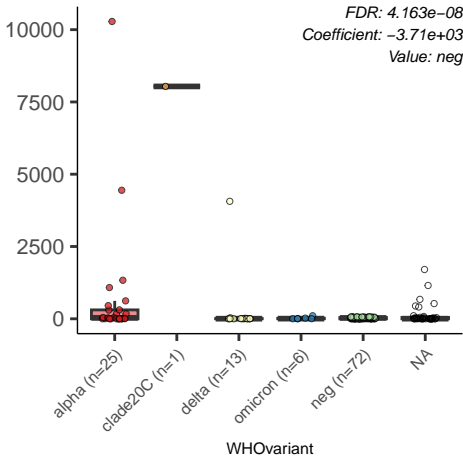

Actinobacteria.c\_Actinomycetia.o\_Corynebacteriales.f\_Mycoba

FDR:  $4.772e-08$   
Coefficient:  $-1.29e+04$   
Value: neg

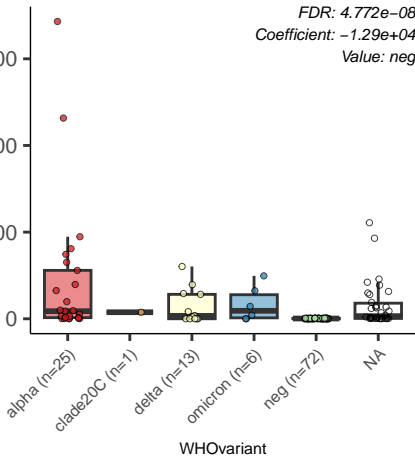

d\_\_Bacteria.p\_\_Gemmatimonadetes

FDR:  $4.776e-08$   
Coefficient:  $-6.20e+02$   
Value: neg

1000

500

0

alpha (n=25)

clade20C (n=1)

delta (n=13)

omicron (n=6)

neg (n=72)

NA

WHOvariant

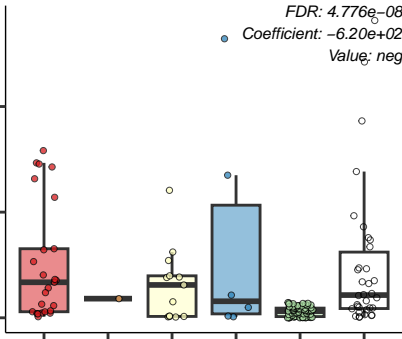

d\_\_Bacteria.p\_\_Gemmatimonadetes.c\_\_Gemmatimonada

FDR:  $4.776e-08$   
Coefficient:  $-6.20e+02$   
Value: neg

1000  
500  
0

alpha (n=25)

clade20C (n=1)

delta (n=13)

omicron (n=6)

neg (n=72)

NA

WHOvariant

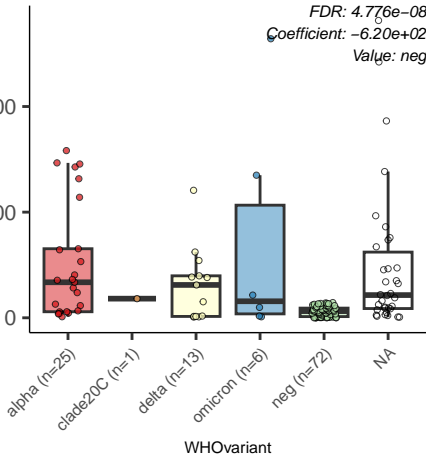



d\_Bacteria.p\_Gemmatimonadetes.c\_Gemmatimonadetes.o\_Ge

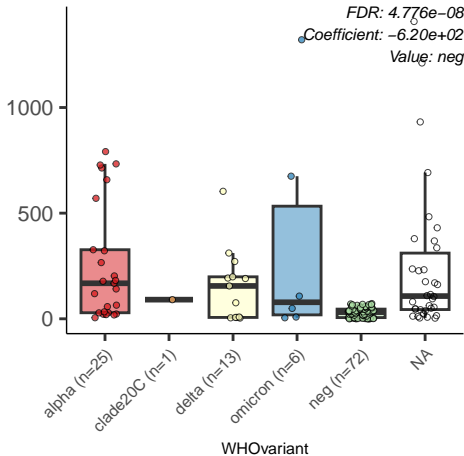

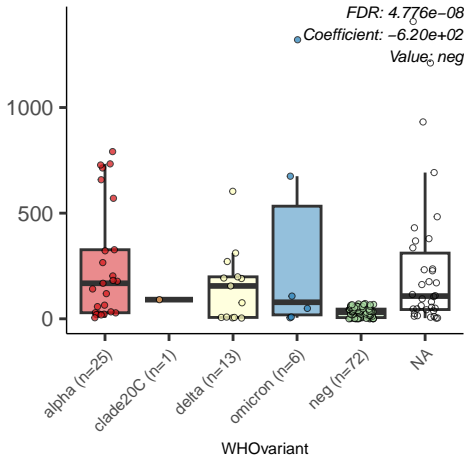

bacteria.p\_\_Firmicutes.c\_\_Clostridia.o\_\_Eubacteriales.f\_\_Lachnospir

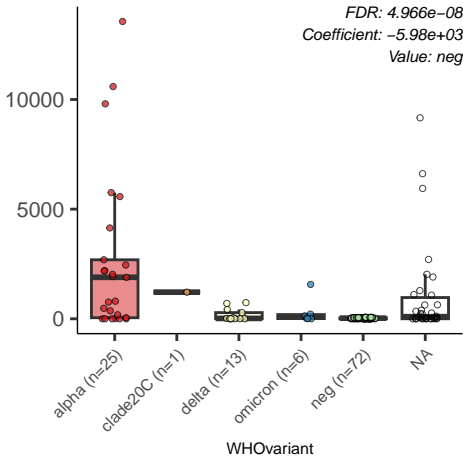

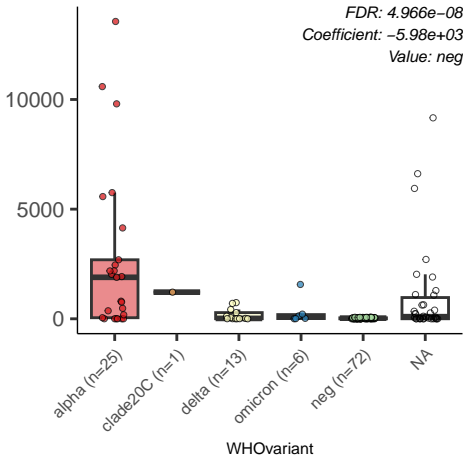

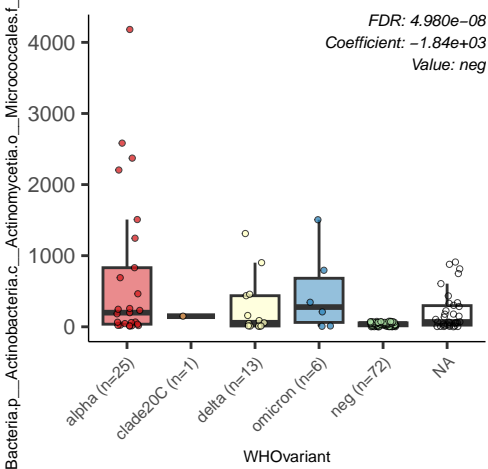

d\_\_Bacteria.p\_\_Cyanobacteria.o\_\_Oscillatoriales.f\_\_Oscillatoriaceae

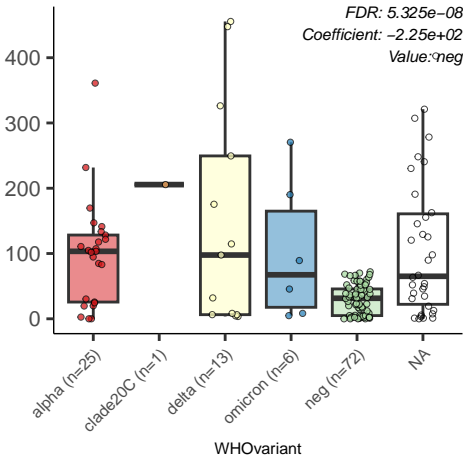

Bacteria.p\_\_Firmicutes.c\_\_Clostridia.o\_\_Eubacteriales.f\_\_Clostridia

FDR:  $5.328 \times 10^{-8}$   
Coefficient:  $-1.35 \times 10^4$   
Value<sub>delta</sub>

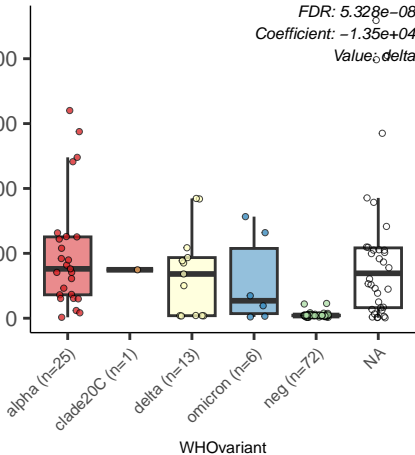

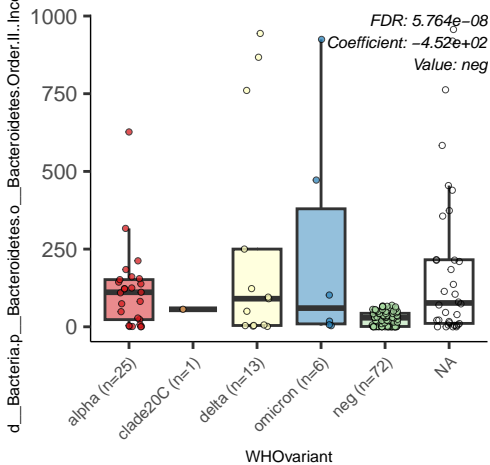



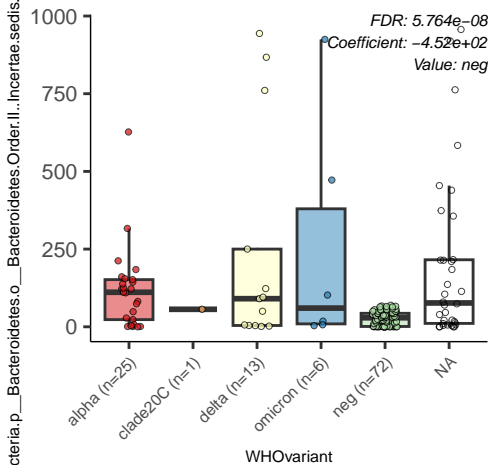

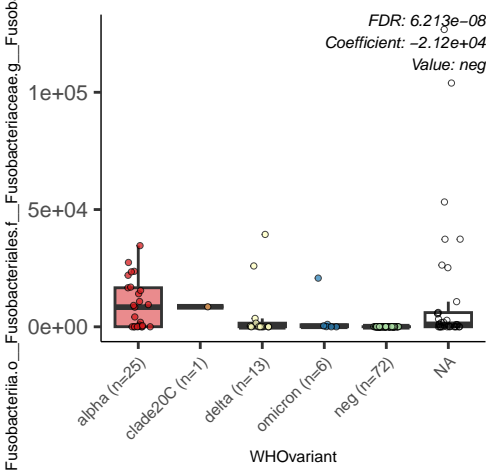

d\_Bacteria.p\_Cyanobacteria.o\_Oscillatoriales.f\_Microo

*FDR: 6.223e-08*  
*Coefficient: -6.20e+02*  
*Value: neg*

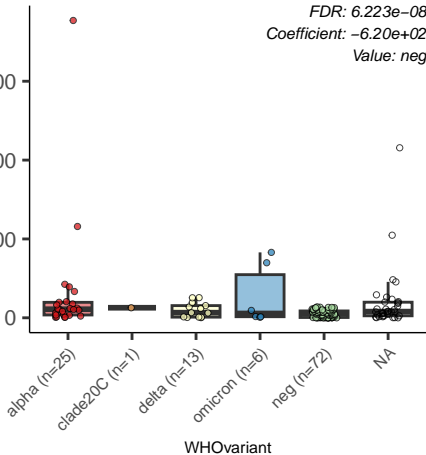

d\_Bacteria.p\_\_Firmicutes.c\_\_Clostridia.o\_\_Eubacteriales.f\_\_Chr

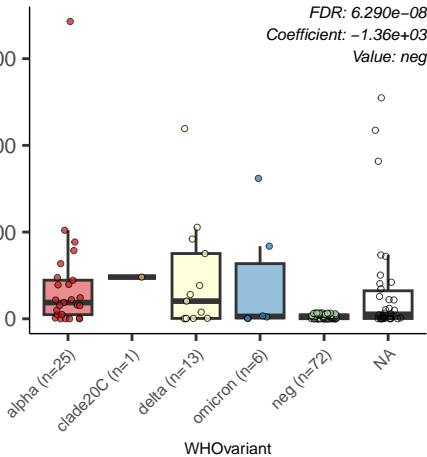

eria.p\_\_Firmicutes.c\_\_Clostridia.o\_\_Eubacteriales.f\_\_Christensenell

FDR:  $6.290e-08$   
Coefficient:  $-1.36e+03$   
Value: neg

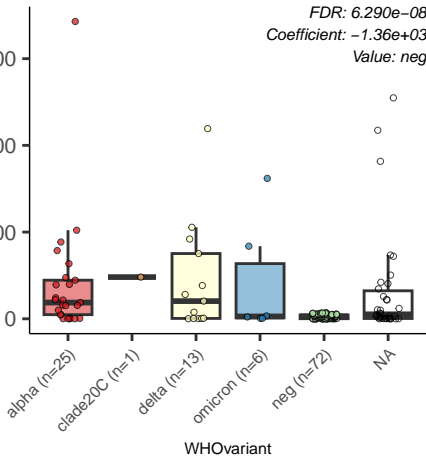

rmicutes.c\_\_Clostridia.o\_\_Eubacteriales.f\_\_Lachnospiraceae.g\_\_Bu

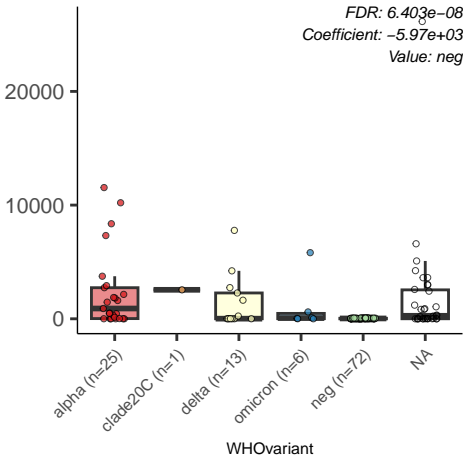

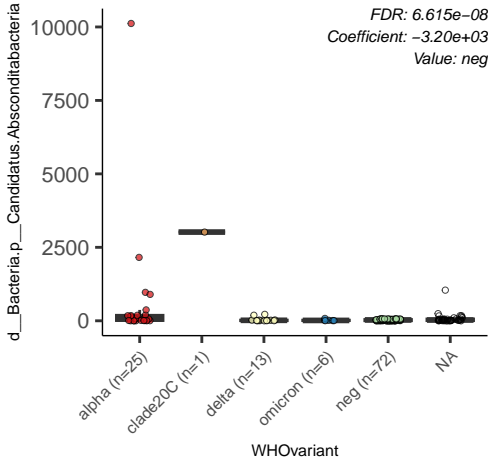

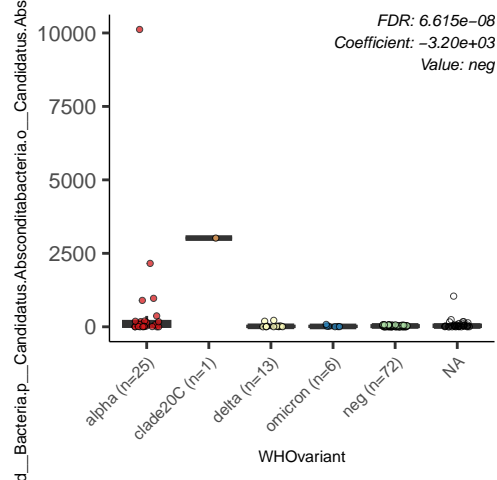



candidatus.Absconditabacteria.o\_\_Candidatus.Absconditabacterales.

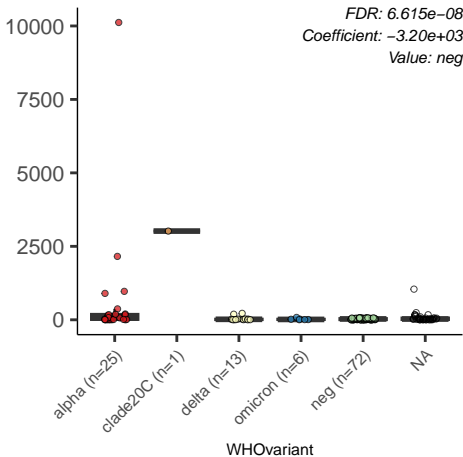

nditabacteria.o\_\_Candidatus.Absconditabacterales.f\_\_Candidatus.A

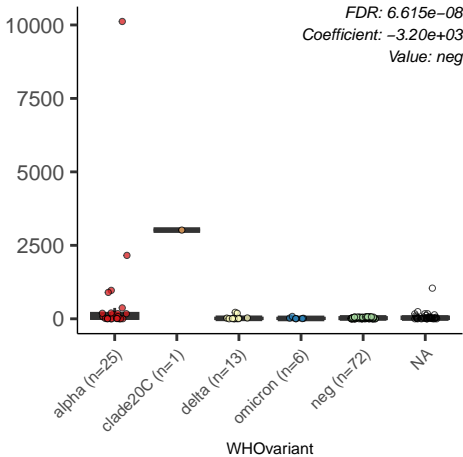

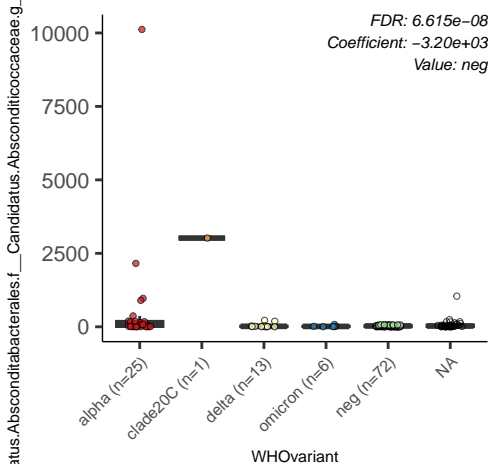

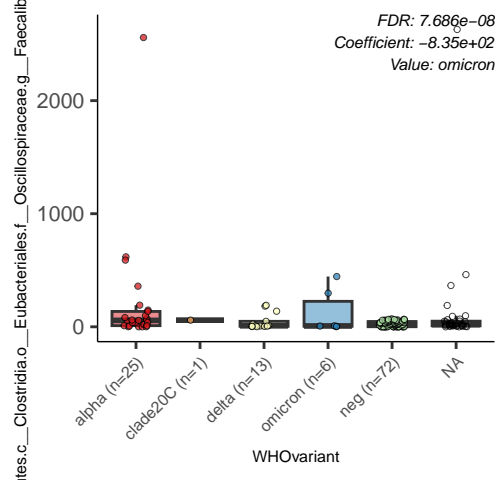

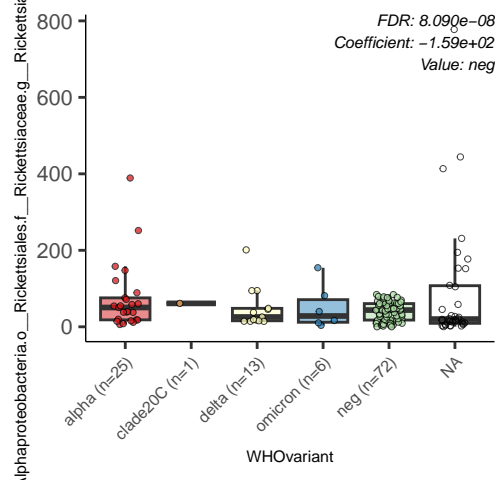

cteria.p\_\_Firmicutes.c\_\_Bacilli.o\_\_Bacillales.f\_\_Bacillaceae.g\_\_Bac

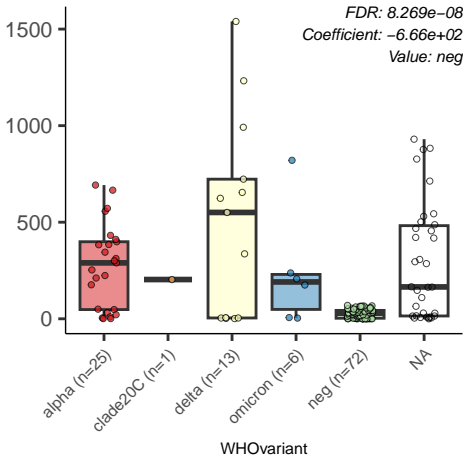

d\_\_Bacteria.p\_\_Thermotogae

FDR:  $8.311e-08$   
Coefficient:  $-1.07e+03$   
Value: neg

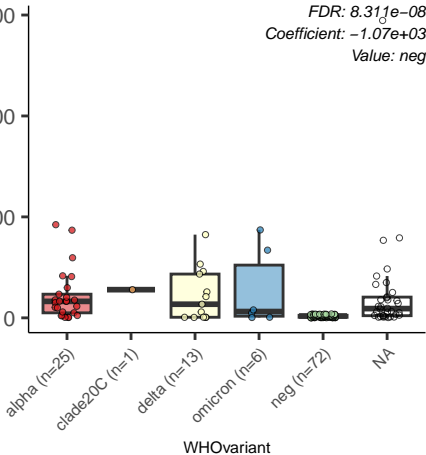

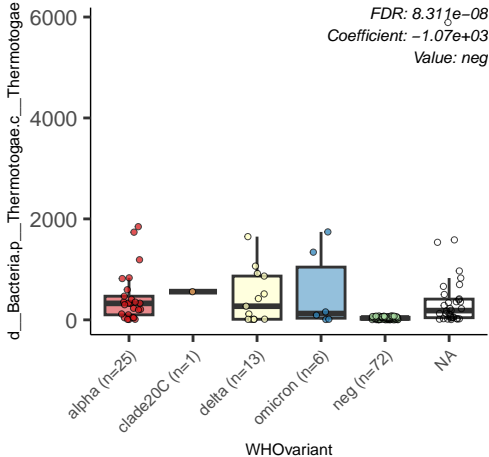



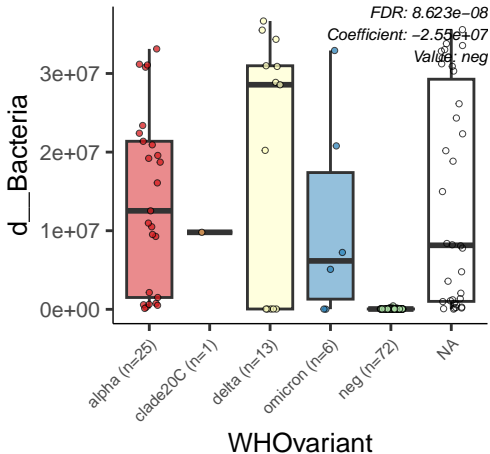

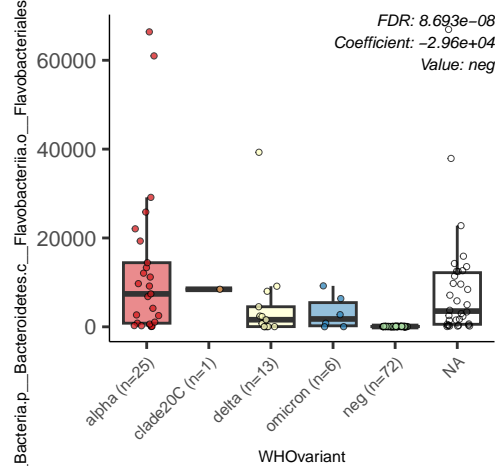

c\_\_Clostridia.o\_\_Eubacteriales.f\_\_Desulfitobacteriaceae.g\_\_Desulf

*FDR: 8.716e-08*  
*Coefficient: -5.88e+02*  
*Value: neg*

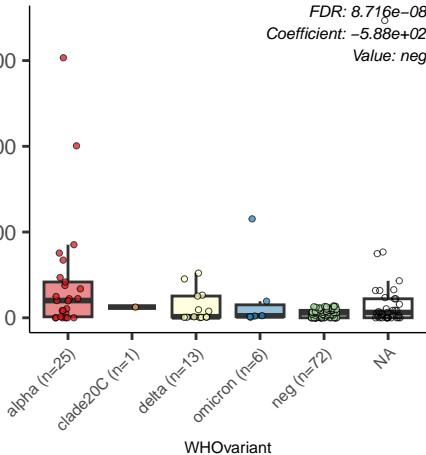

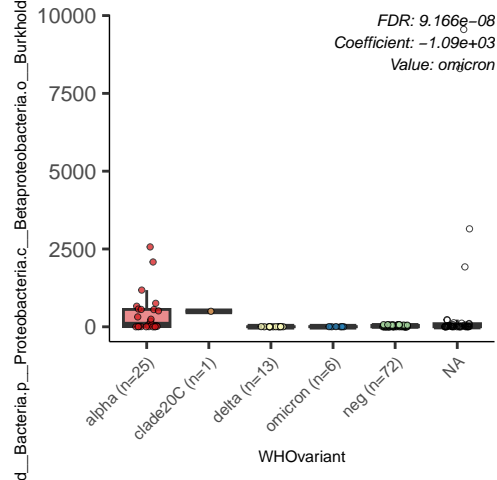

p\_\_Proteobacteria.c\_\_Betaproteobacteria.o\_\_Burkholderiales.g\_\_lr

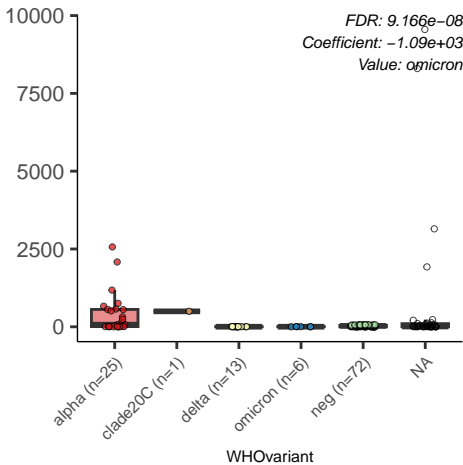

d\_\_Bacteria.p\_\_Bacteroidetes.c\_\_Sphingobacteriia

FDR:  $9.366e-08$   
Coefficient:  $-5.00e+03$   
Value: neg

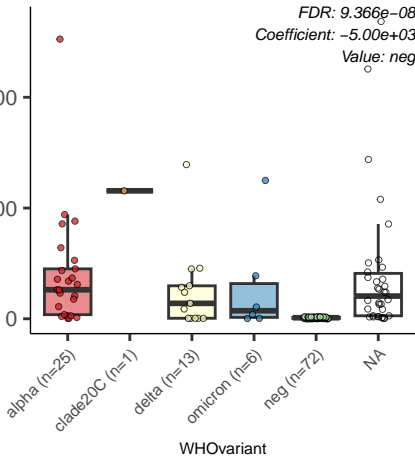

d\_\_Bacteria.p\_\_Bacteroidetes.c\_\_Sphingobacteriia.o\_\_Sphing

FDR:  $9.366e-08$   
Coefficient:  $-5.00e+03$   
Value: neg

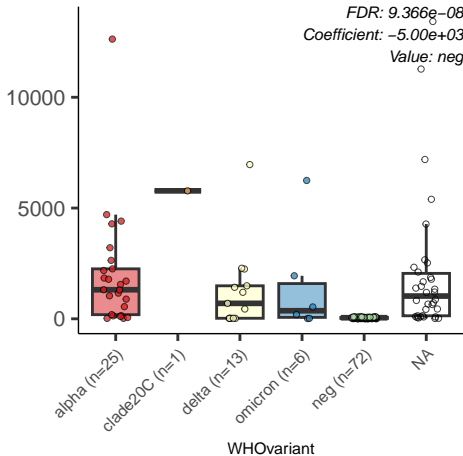

acteria.p\_\_Bacteroidetes.c\_\_Sphingobacteriia.o\_\_Sphingobacteriales

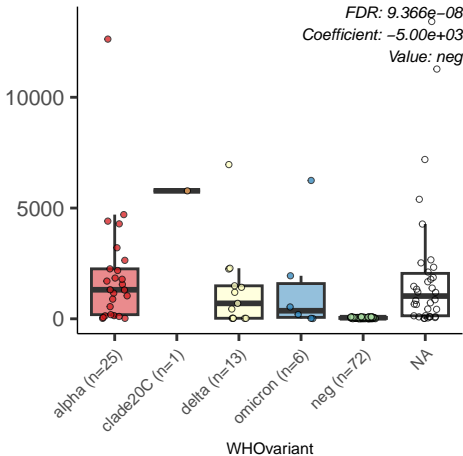



bacteria.o\_\_Synechococcales.f\_\_Synechococcaceae.g\_\_Synecho

FDR:  $9.509e-08$   
Coefficient:  $-2.92e+02$   
Value: neg

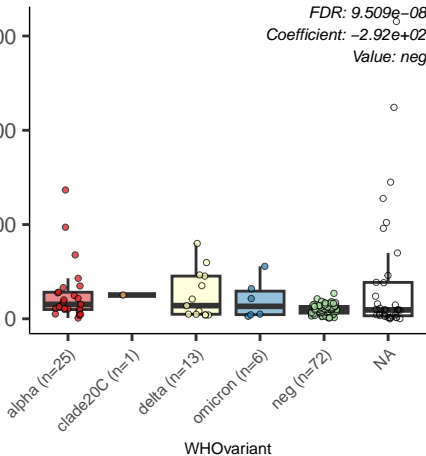

bacteria.c\_\_Fusobacteriia.o\_\_Fusobacteriales.f\_\_Leptotrichiaceae.g

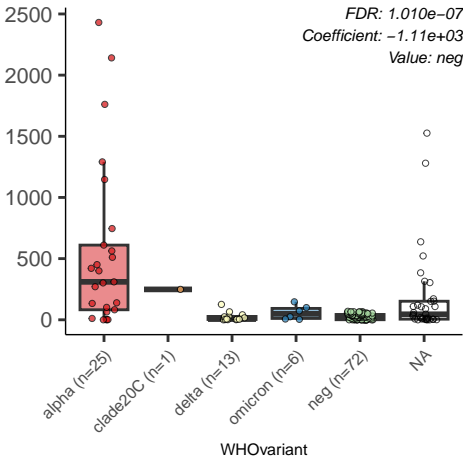

o\_\_Cyanobacteria.o\_\_Oscillatoriales.f\_\_Oscillatoriaceae.g\_\_Oscillatoria

FDR: 1.022e-07  
Coefficient: -2.14e+02  
Value: neg

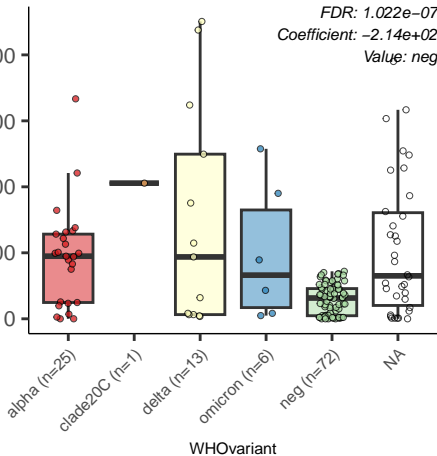

Proteobacteria.c\_\_Alphaproteobacteria.o\_\_Hyphomicrobiales.f\_\_Nit

FDR:  $1.023 \times 10^{-7}$   
Coefficient:  $-3.36 \times 10^3$   
Value: omicron

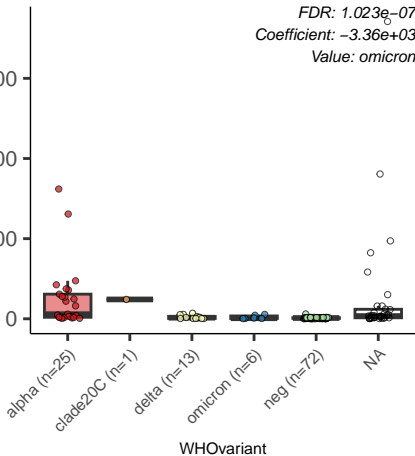

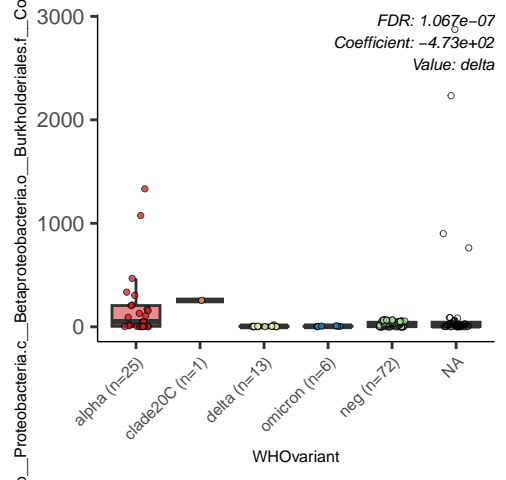

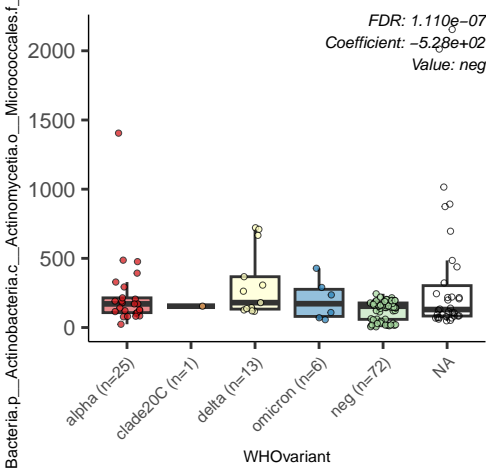

u.p\_\_Actinobacteria.c\_\_Actinomycetia.o\_\_Micrococcales.f\_\_Brevibac

FDR:  $1.110e-07$   
Coefficient:  $-5.28e+02$   
Value: neg

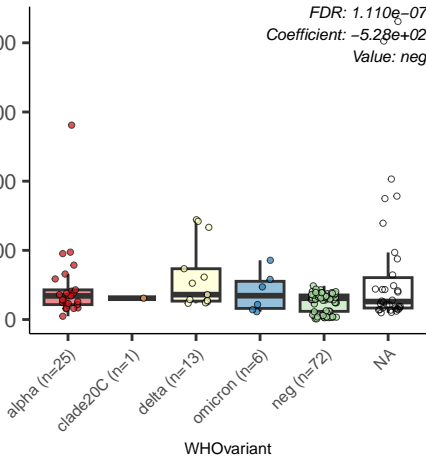

Bacteria.p\_\_Proteobacteria.c\_\_Betaproteobacteria.o\_\_Burkholderia

FDR:  $1.139e-07$   
Coefficient:  $-7.45e+02$   
Value: omicron

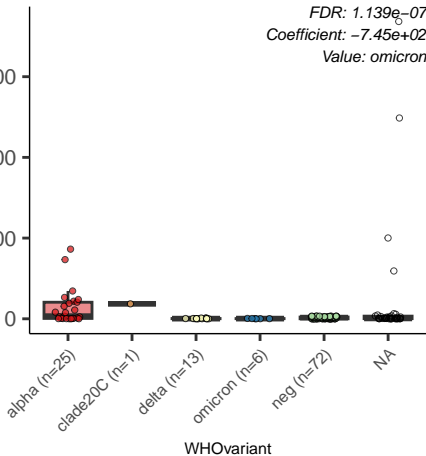



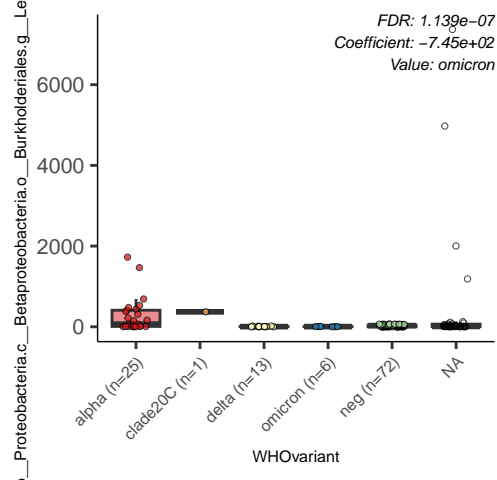

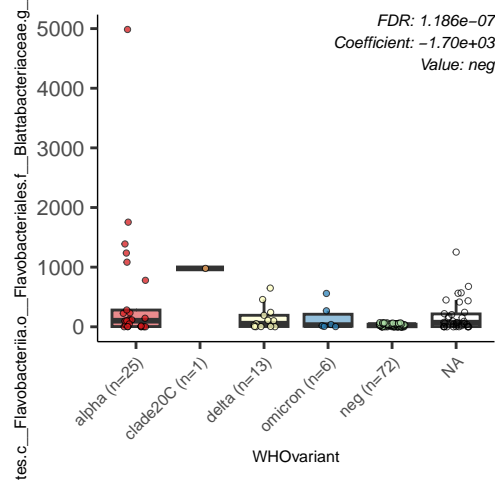

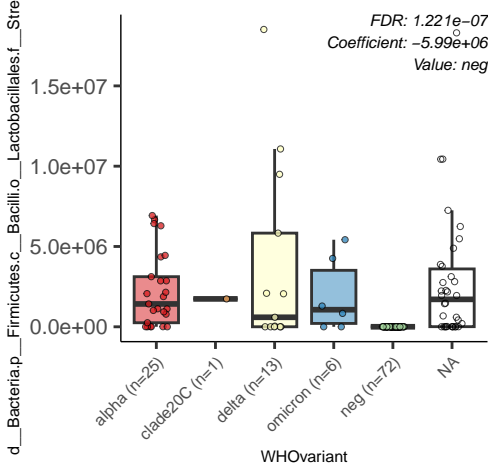

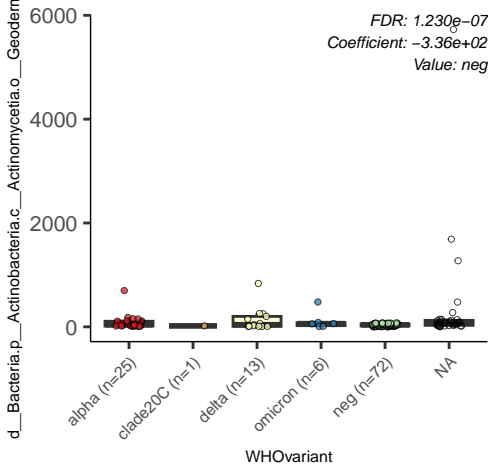

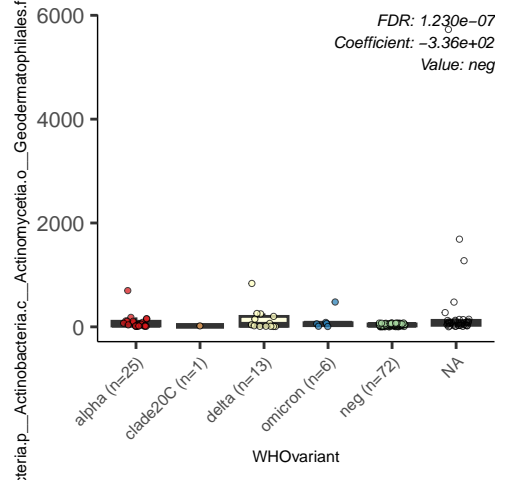

es.c\_\_Tissierellia.o\_\_Tissierellales.f\_\_Peptoniphilaceae.g\_\_Anaeroco

*FDR: 1.230e-07*  
*Coefficient: -1.95e+03*  
*Value: omicron*

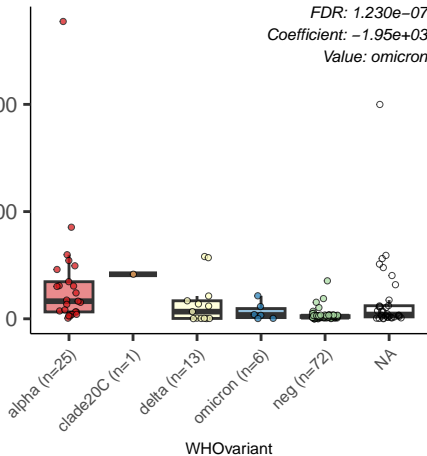

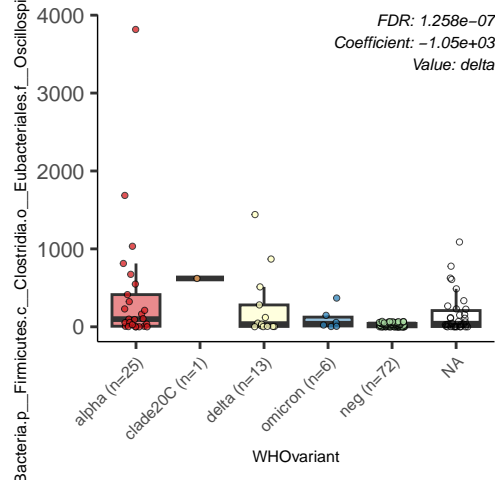

Bacteria.p\_\_Firmicutes.c\_\_Clostridia.o\_\_Eubacteriales.f\_\_Lachnos

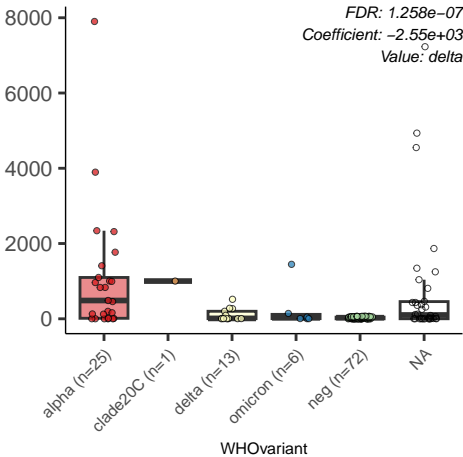



p\_Firmicutes.c\_\_Clostridia.o\_\_Eubacteriales.f\_\_Lachnospiraceae

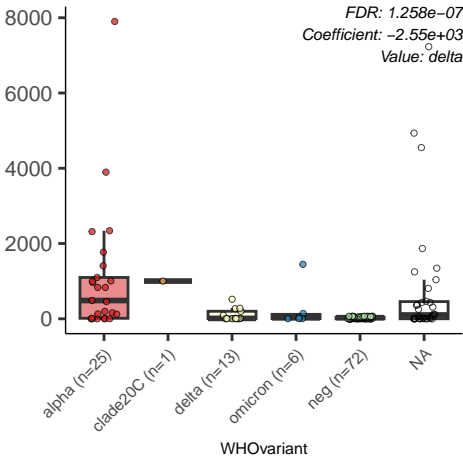

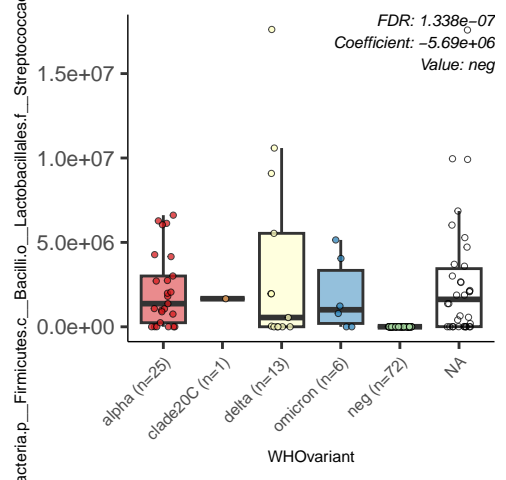

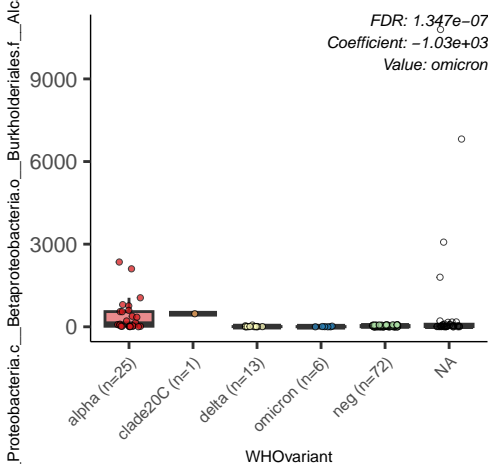

cteria.p\_\_Firmicutes.c\_\_Clostridia.o\_\_Eubacteriales.f\_\_Lachnospira

*FDR: 1.408e-07*  
*Coefficient: -1.50e+03*  
*Value: neg*

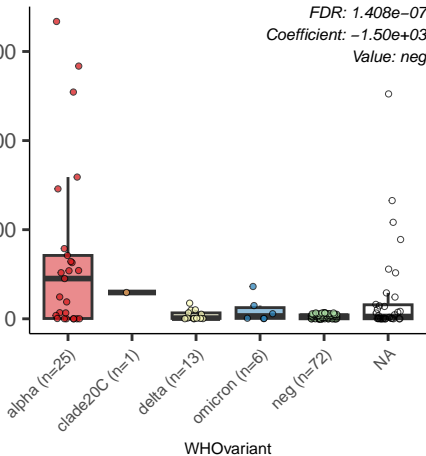

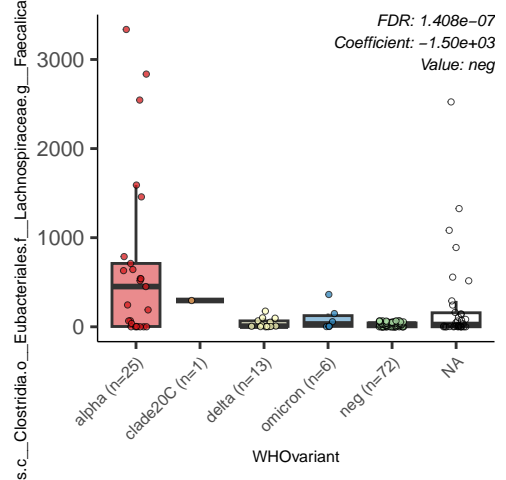

cteria.p\_Firmicutes.c\_Bacilli.o\_Lactobacillales.f\_Lactobacillace

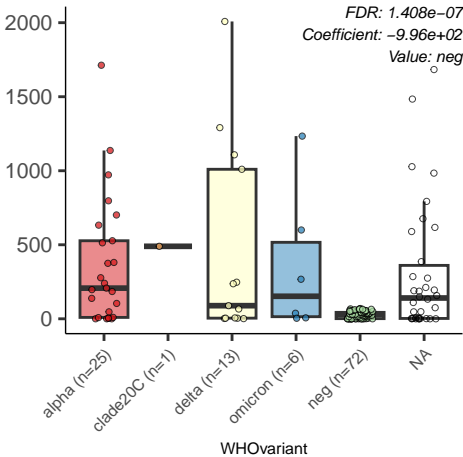

tes.c\_\_Bacilli.o\_\_Lactobacillales.f\_\_Lactobacillaceae.g\_\_Acetillactob

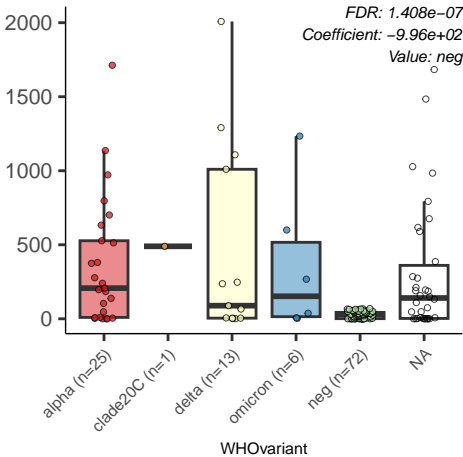

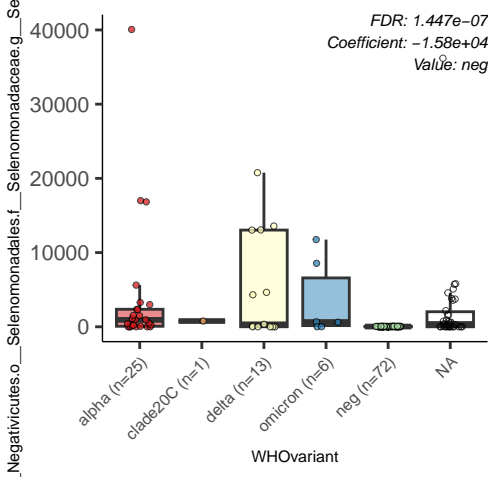



ria.p\_Actinobacteria.c\_Actinomycetia.o\_Micrococcales.f\_Derma

*FDR: 1.512e-07*  
*Coefficient: -1.74e+03*  
*Value: neg*

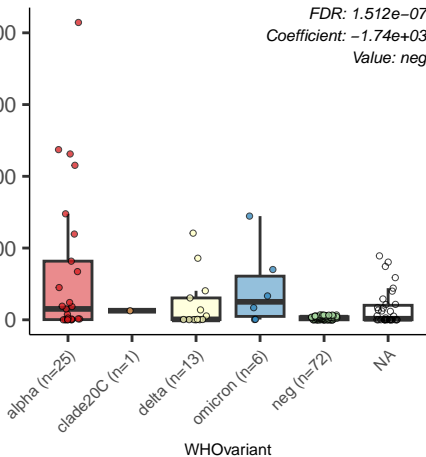

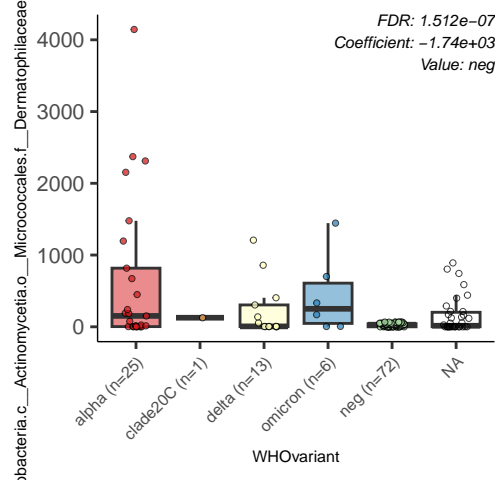

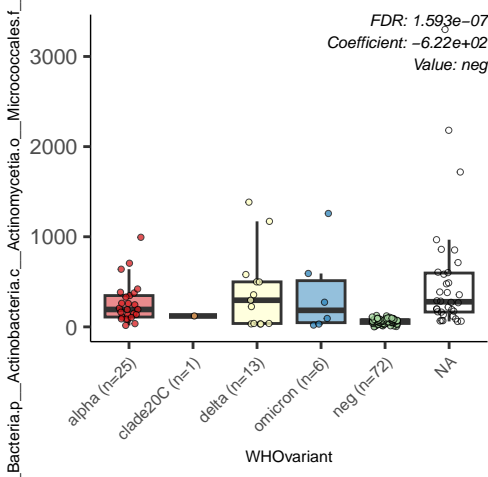

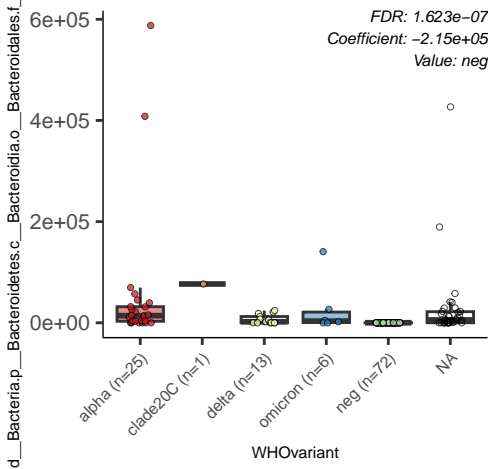

cteria.p\_\_Proteobacteria.c\_\_Alphaproteobacteria.o\_\_Hyphomicrobia

FDR:  $1.697e-07$   
Coefficient:  $-7.28e+03$   
Value: omicron

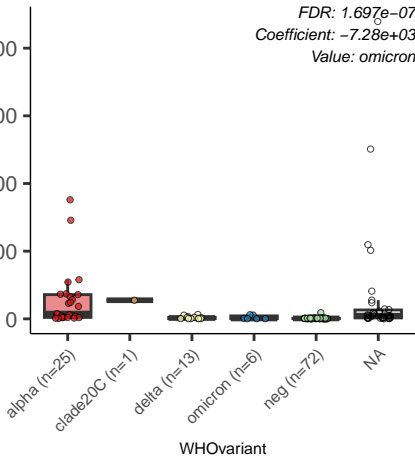

a.p\_\_Proteobacteria.c\_\_Alphaproteobacteria.o\_\_Hyphomicrobiales.

FDR:  $1.759e-07$   
Coefficient:  $-3.62e+02$   
Value: omicron

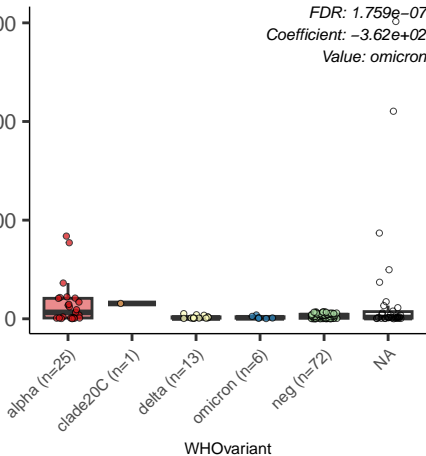

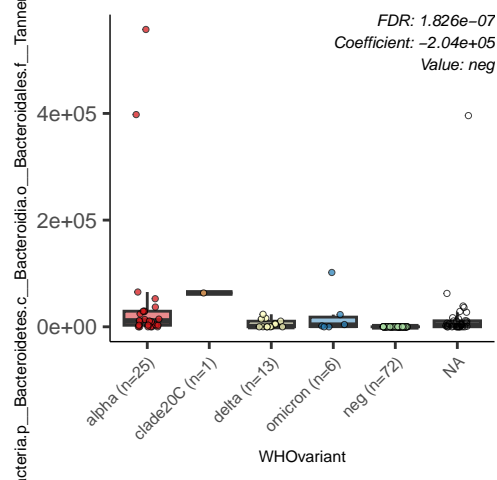

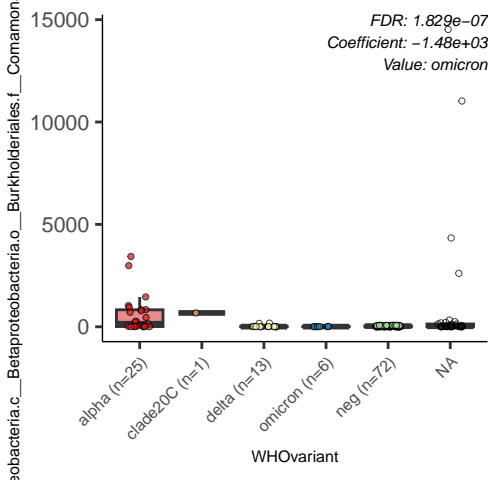



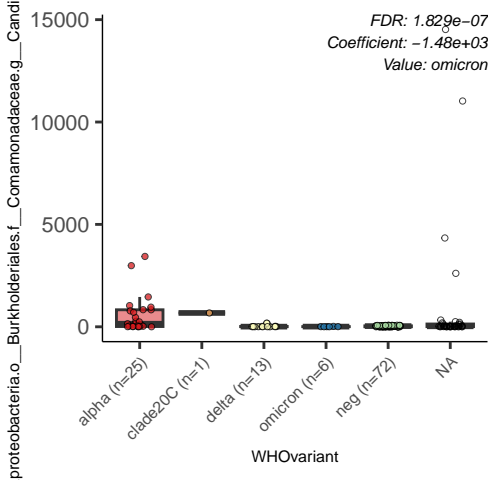

ria.c\_\_Fusobacteriia.o\_\_Fusobacteriales.f\_\_Leptotrichiaceae.g\_\_Le

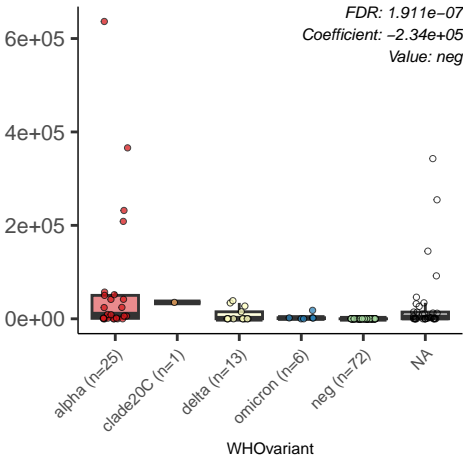

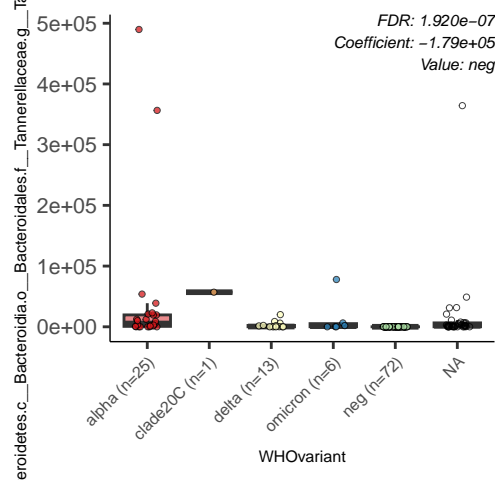

phylum: Bacteroidetes, class: Sphingobacteriia, order: Sphingobacteriales, family: Sphingobacteriaceae, genus: Sphingobacterium, species: Sphingobacterium

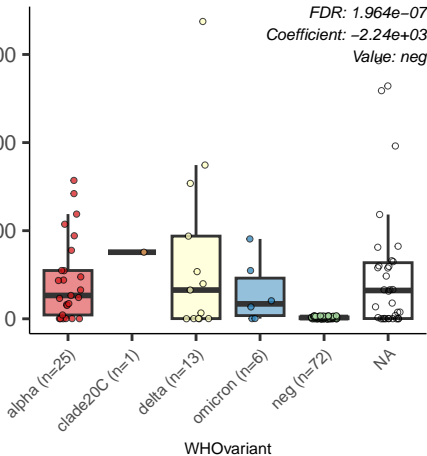

teria.p\_\_Firmicutes.c\_\_Bacilli.o\_\_Bacillales.f\_\_Bacillaceae.g\_\_Baci

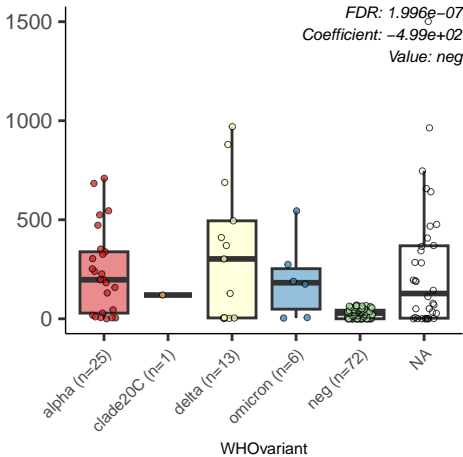

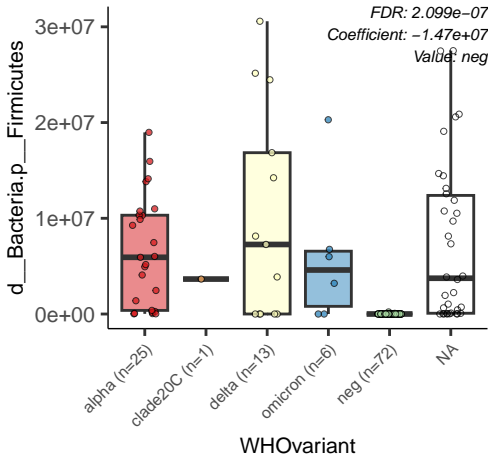

terial.c\_\_Betaproteobacteria.o\_\_Burkholderiales.f\_\_Alcaligenaceae.g\_\_

FDR:  $2.114 \times 10^{-7}$   
Coefficient:  $-1.02 \times 10^3$   
Value: omicron

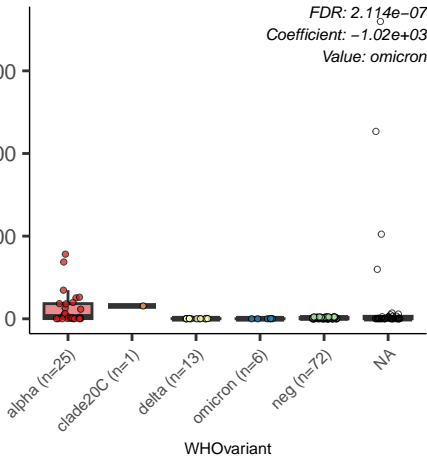

\_Bacteria.p\_Firmicutes.c\_Clostridia.o\_Eubacteriales.f\_Lachnos

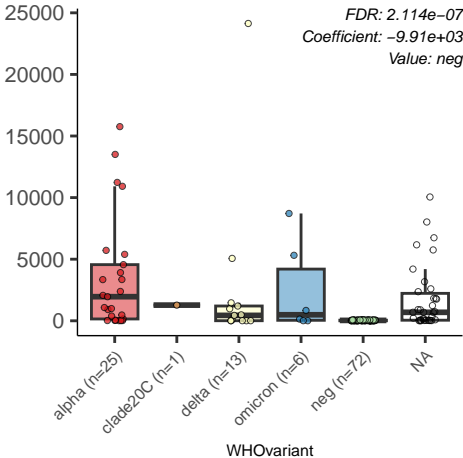



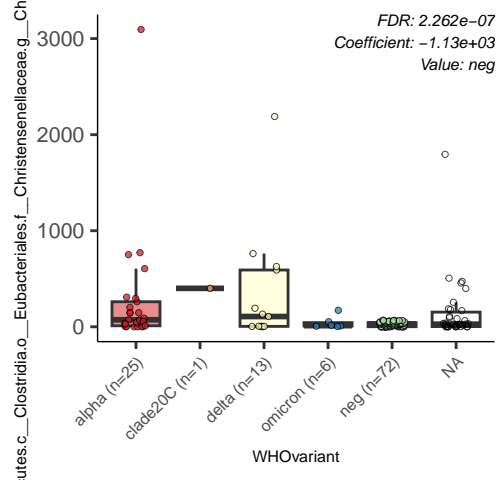

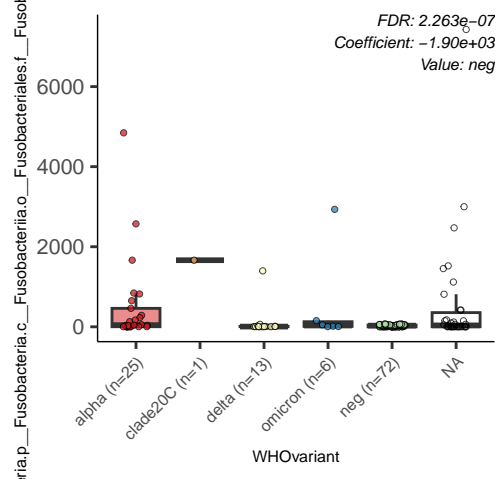

bacteria.c\_\_Fusobacteriia.o\_\_Fusobacteriales.f\_\_Fusobacteriaceae

FDR:  $2.263e-07$   
Coefficient:  $-1.90e+03$   
Value: neg

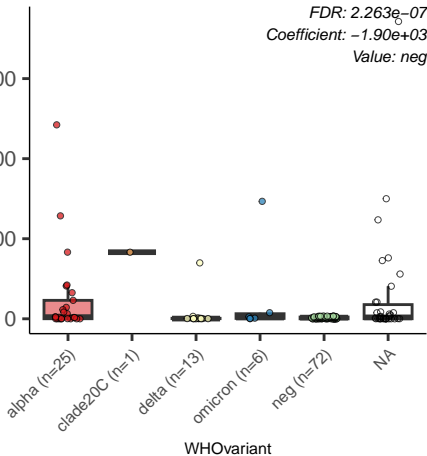

d\_Bacteria.p\_\_Firmicutes.c\_\_Bacilli.o\_\_Bacillales.f\_\_Bacillaceae

FDR:  $2.263e-07$   
Coefficient:  $-1.58e+02$   
Value: neg

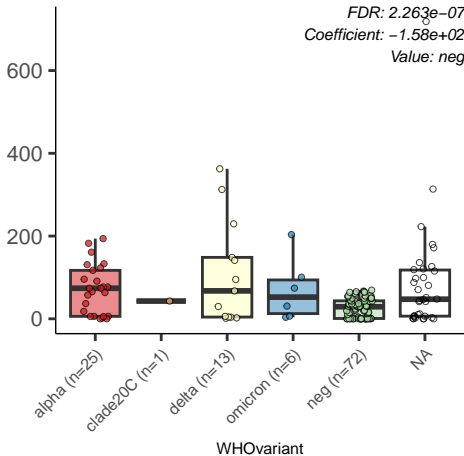

p\_Firmicutes.c\_Bacilli.o\_Bacillales.f\_Bacillaceae.g\_Weizmann

FDR:  $2.263e-07$   
Coefficient:  $-1.58e+02$   
Value: neg

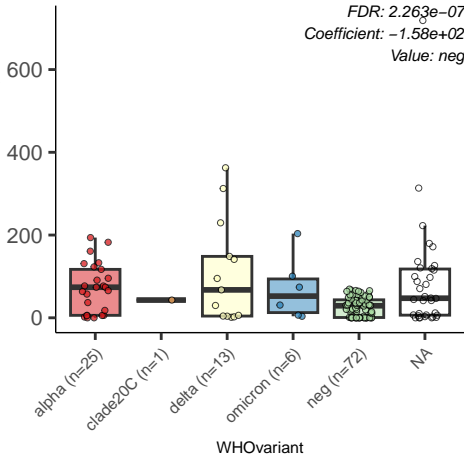

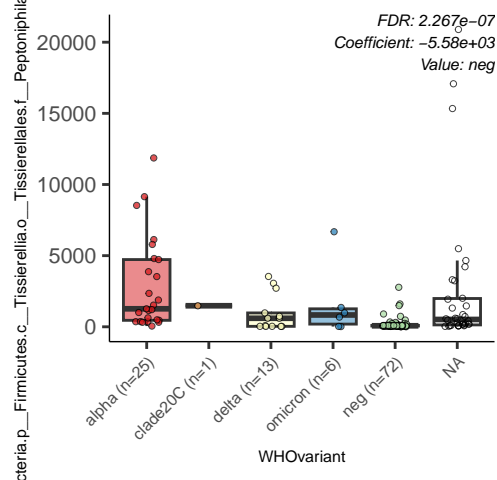

a.p\_\_Firmicutes.c\_\_Clostridia.o\_\_Eubacteriales.f\_\_Desulfitobacteria

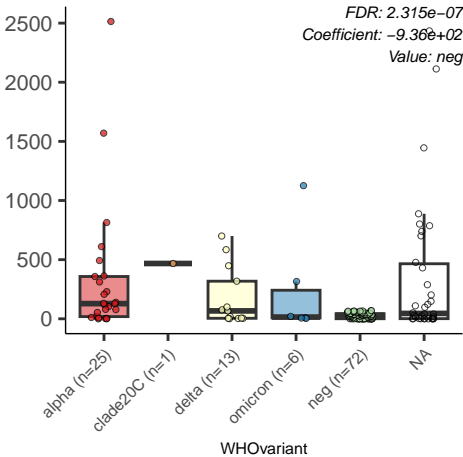

bacteria.p\_\_Firmicutes.c\_\_Clostridia.o\_\_Eubacteriales.f\_\_Clostridiace

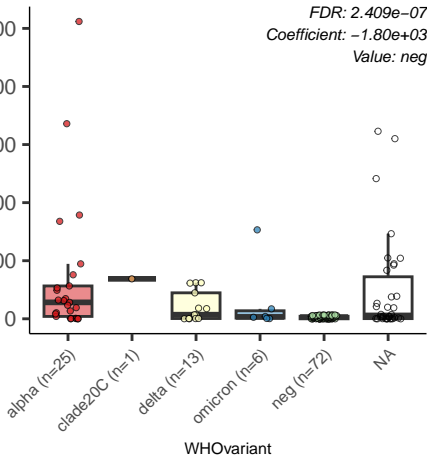



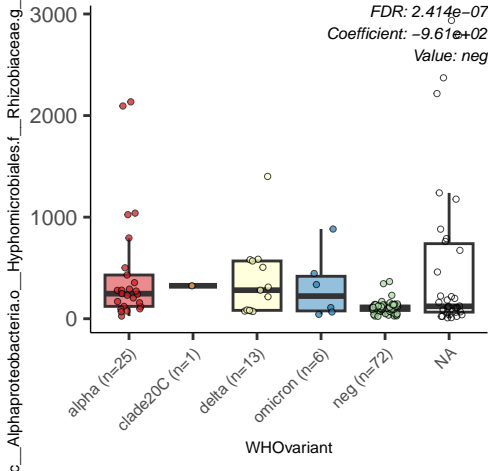

Bacteria.p\_\_Proteobacteria.c\_\_Betaproteobacteria.o\_\_Burkholderia

FDR:  $2.418e-07$   
Coefficient:  $-9.43e+02$   
Value: omicron

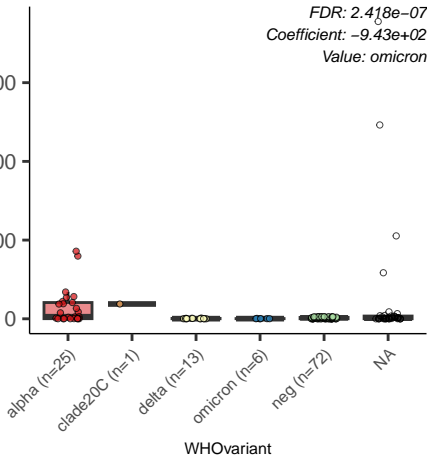

Proteobacteria.c\_\_Betaproteobacteria.o\_\_Burkholderiales.g\_\_Ideo

FDR:  $2.418e-07$   
Coefficient:  $-9.43e+02$   
Value: omicron

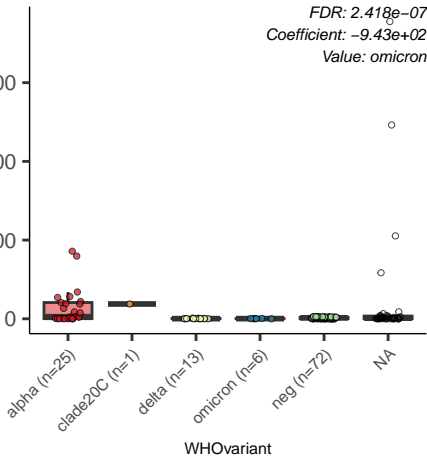

Value: neg

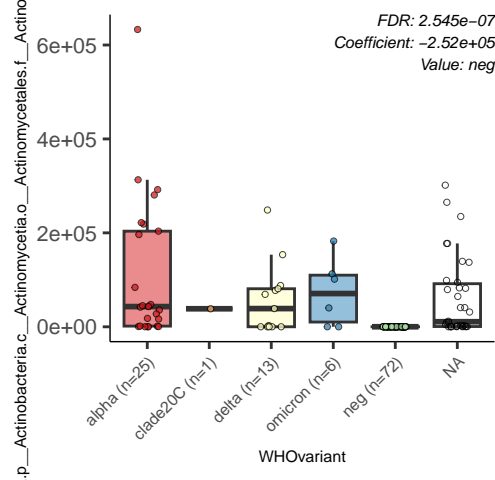

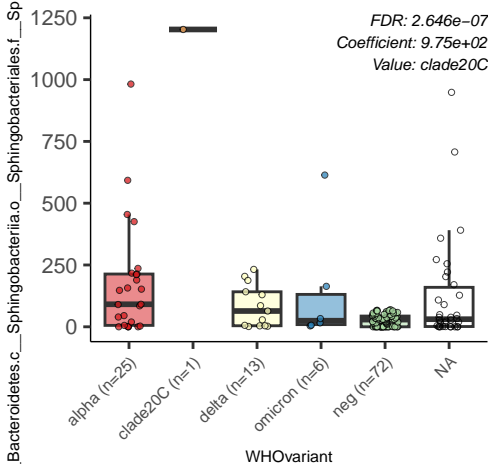

eria.p\_\_Firmicutes.c\_\_Clostridia.o\_\_Eubacteriales.f\_\_Lachnospira

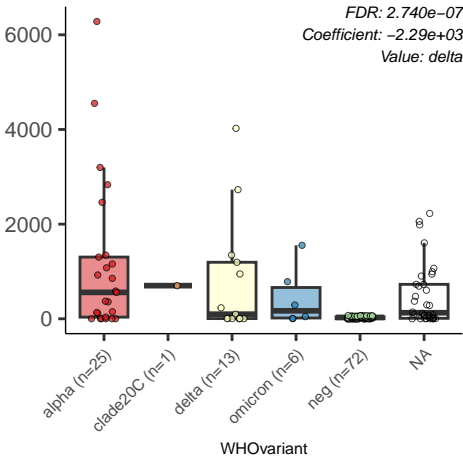

icutes.c\_\_Clostridia.o\_\_Eubacteriales.f\_\_Lachnospiraceae.g\_\_Anaer

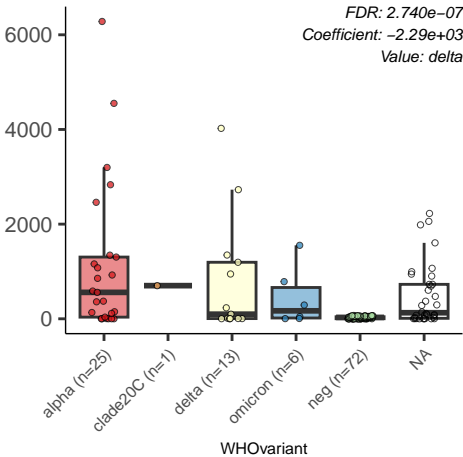

obacteria.c\_\_Betaproteobacteria.o\_\_Burkholderiales.f\_\_Comamonad

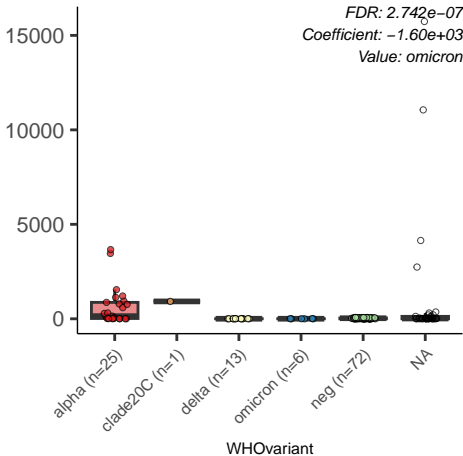



d\_Bacteria.p\_Bacteroidetes.c\_Chitinophagia

FDR:  $2.786e-07$   
Coefficient:  $-1.94e+03$   
Value: neg

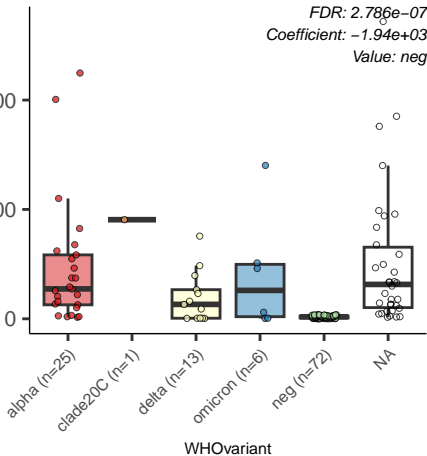

d\_Bacteria.p\_Bacteroidetes.c\_\_Chitinophagia.o\_\_Chitin

FDR:  $2.786e-07$   
Coefficient:  $-1.94e+03$   
Value: neg

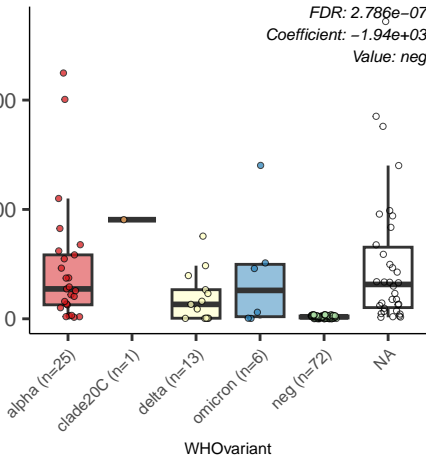

\_Bacteria.p\_\_Bacteroidetes.c\_\_Chitinophagia.o\_\_Chitinophagales.f

FDR:  $2.786e-07$   
Coefficient:  $-1.94e+03$   
Value: neg

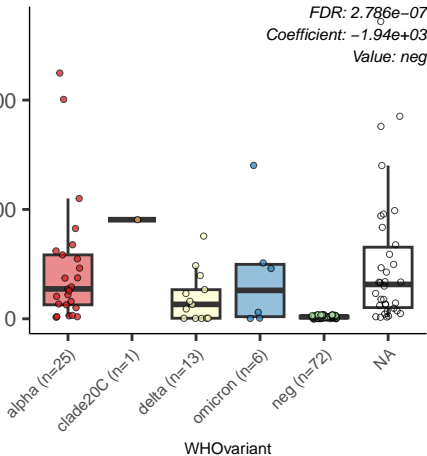

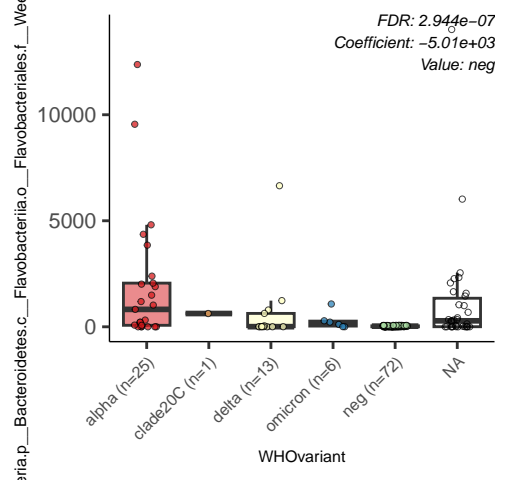

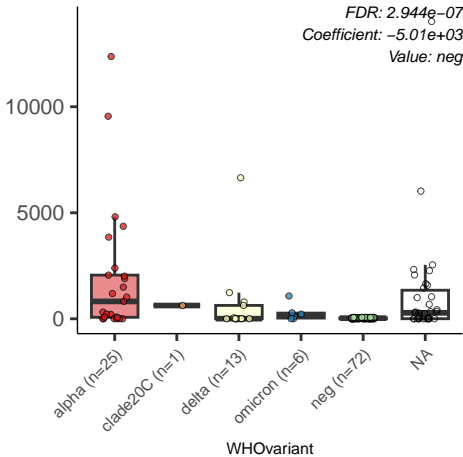

Bacteria.p\_\_Proteobacteria.c\_\_Betaproteobacteria.o\_\_Burkholderia

FDR:  $3.013e-07$   
Coefficient:  $-1.03e+03$   
Value: omicron

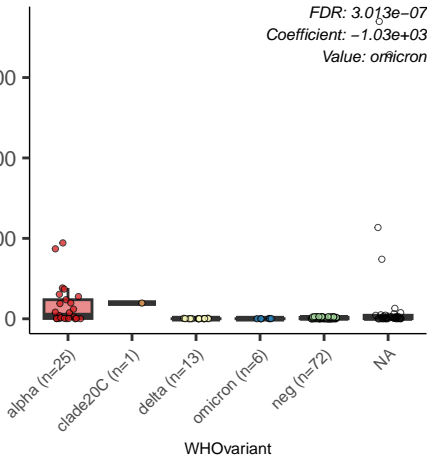

Proteobacteria.c\_\_Betaproteobacteria.o\_\_Burkholderiales.g\_\_Aquim

FDR:  $3.013e-07$   
Coefficient:  $-1.03e+03$   
Value: omiëron

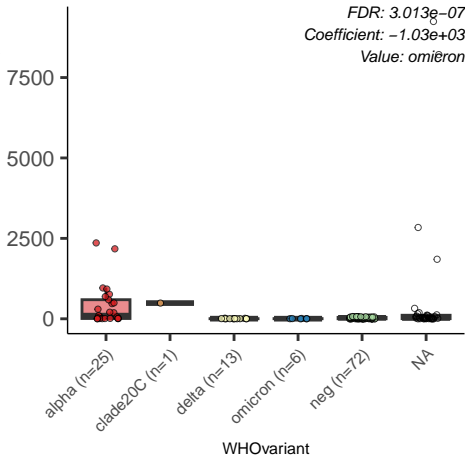

Proteobacteria.c\_\_Betaproteobacteria.o\_\_Burkholderiales.f\_\_Com

FDR:  $3.013e-07$   
Coefficient:  $-3.38e+03$   
Value: omicron

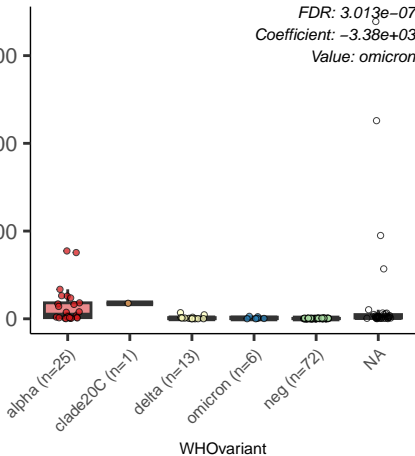



acteria.p\_Firmicutes.c\_Bacilli.o\_Lactobacillales.f\_Enterococcaceae

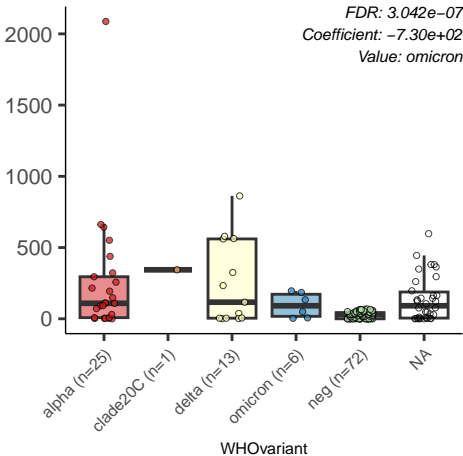

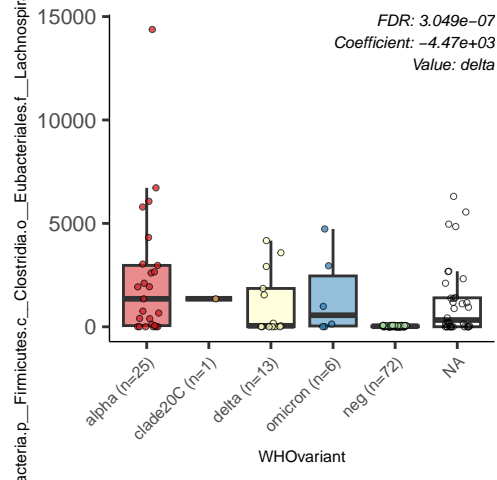

bacteria.p\_Firmicutes.c\_\_Clostridia.o\_\_Eubacteriales.f\_\_Lachnospir

FDR: 3.278e-07  
Coefficient: -5.31e+03  
Value: omicron

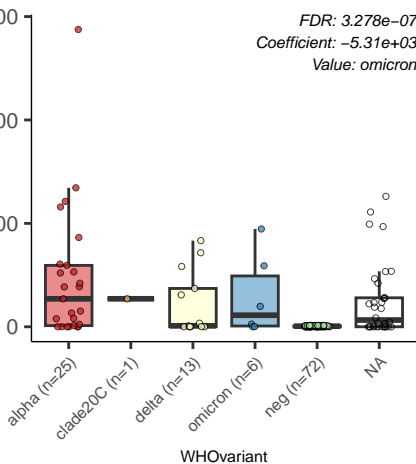

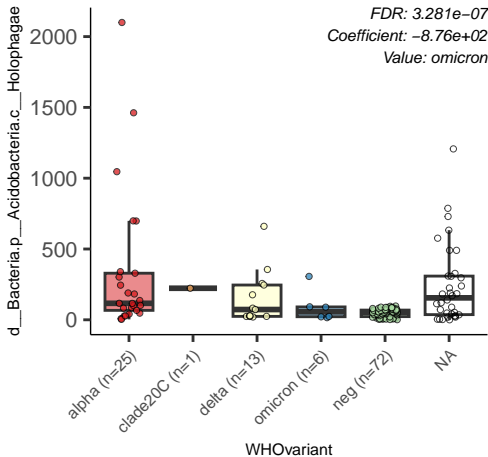

d\_\_Bacteria.p\_\_Acidobacteria.c\_\_Holophagae.o\_\_Acanthopile

FDR:  $3.351e-07$   
Coefficient:  $-8.74e+02$   
Value: omicron

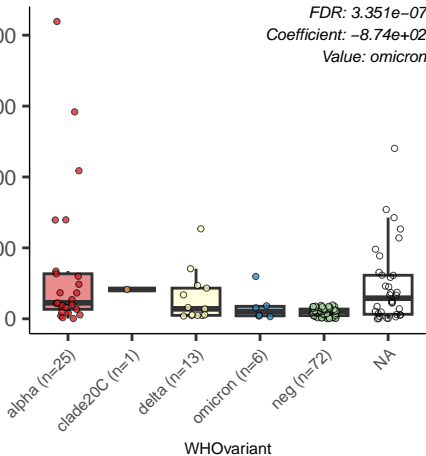

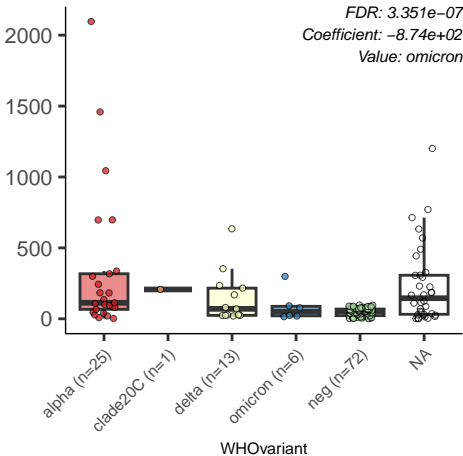

cidobacteria.c\_\_Holophagae.o\_\_Acanthopleuribacterales.f\_\_Acanth

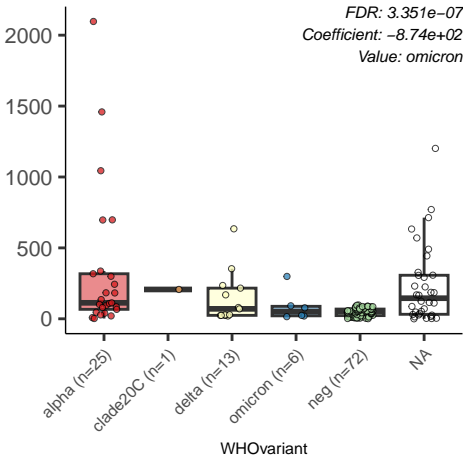

FDR:  $3.351e-07$   
Coefficient:  $-8.74e+02$   
Value: omicron

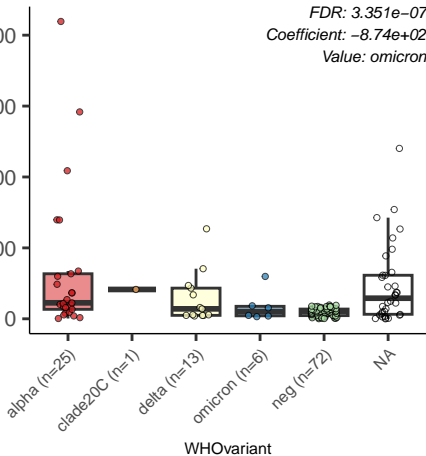



teroidetes.c\_Bacteroidia.o\_Bacteroidales.f\_Bacteroidaceae.g\_E

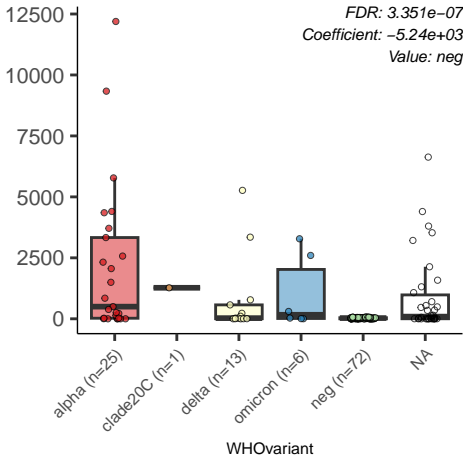

acteroidetes.c\_\_Sphingobacteriia.o\_\_Sphingobacteriales.f\_\_Sphing

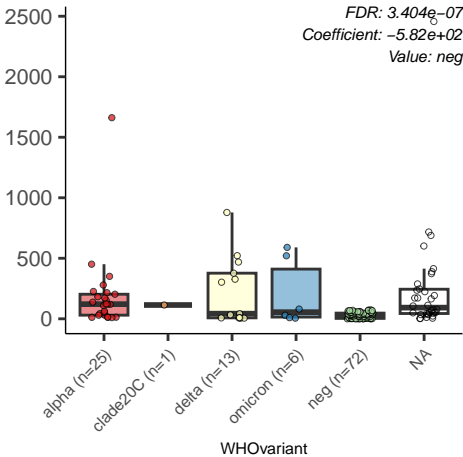

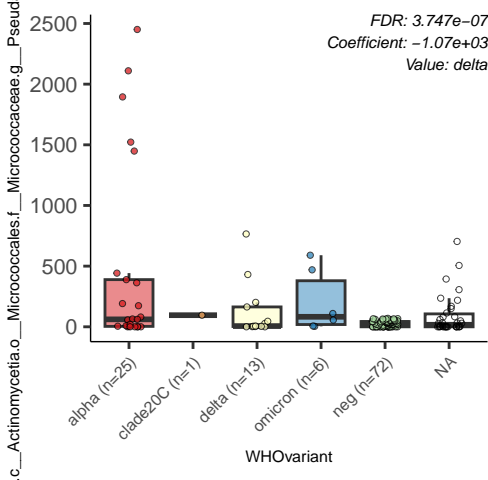

Bacteria.p\_Firmicutes.c\_Clostridia.o\_Eubacteriales.f\_Lachnos

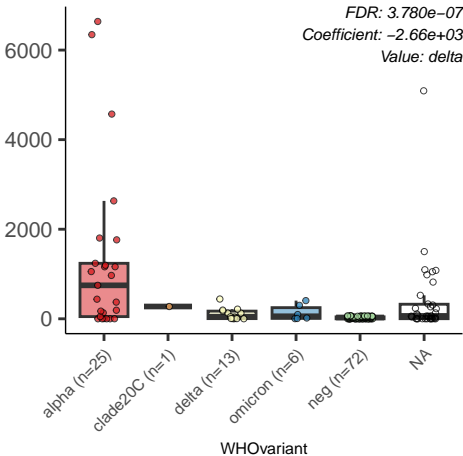

Firmicutes.c\_\_Clostridia.o\_\_Eubacteriales.f\_\_Lachnospiraceae.g

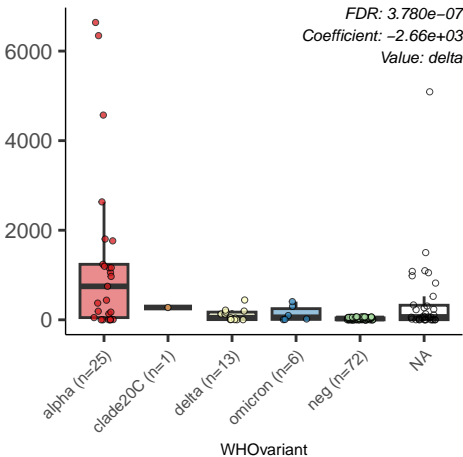

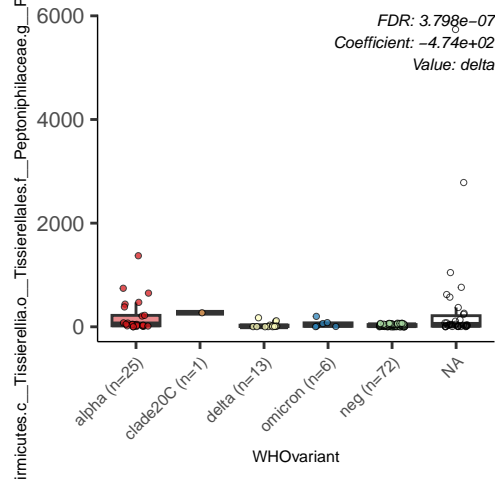

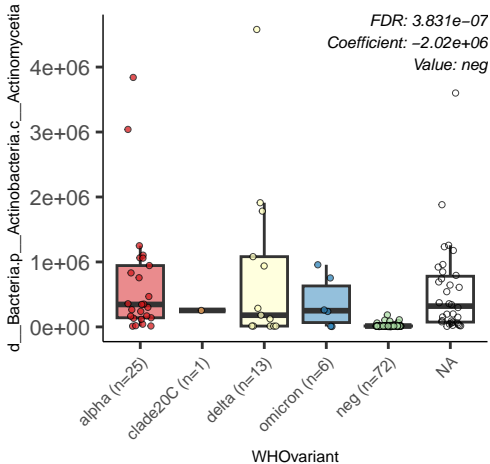

ria.p\_\_Proteobacteria.c\_\_Betaproteobacteria.o\_\_Burkholderiales.g

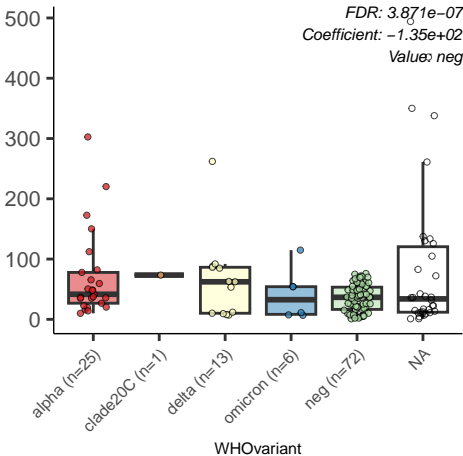



ia.c\_\_Betaproteobacteria.o\_\_Burkholderiales.g\_\_Candidatus.Lichthys

FDR:  $3.871e-07$   
Coefficient:  $-1.35e+02$   
Value: neg

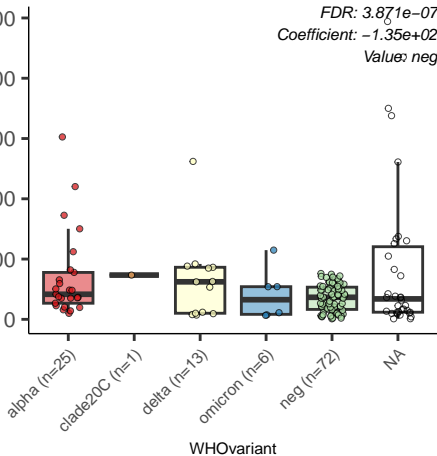

d\_Bacteria.p\_\_Cyanobacteria

FDR:  $4.184 \times 10^{-7}$   
Coefficient:  $-1.91 \times 10^4$   
Value: neg

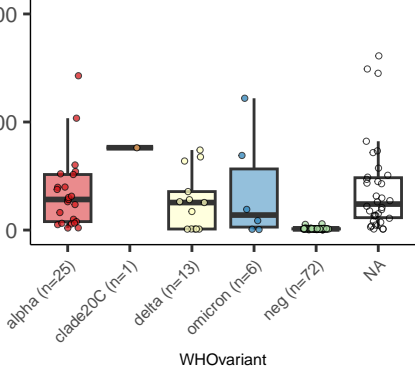



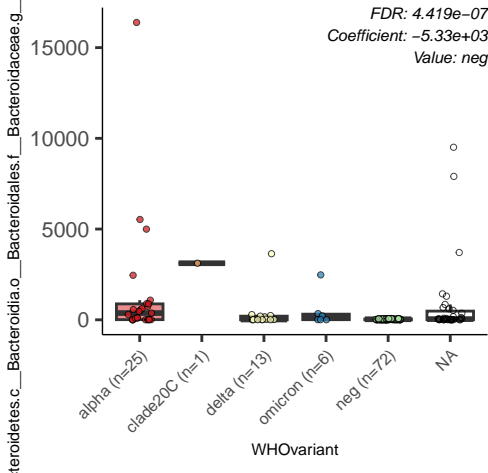

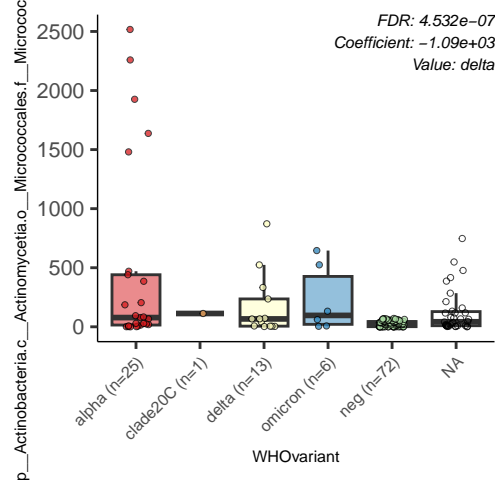

Bacteria.p\_Firmicutes.c\_Clostridia.o\_Eubacteriales.f\_Lachnosp

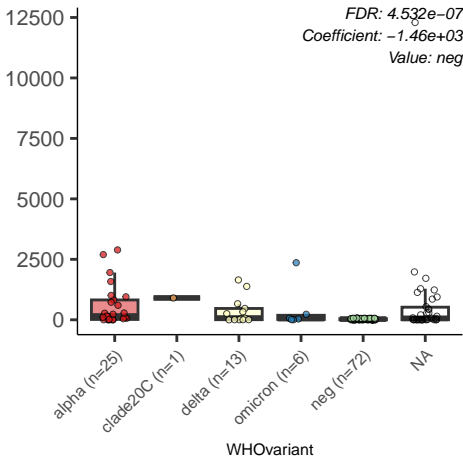

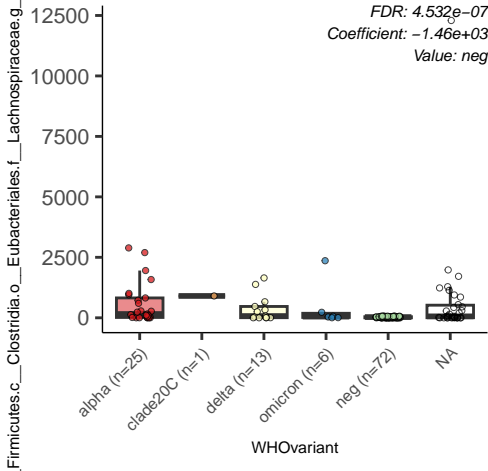

icutes.c\_\_Bacilli.o\_\_Lactobacillales.f\_\_Streptococcaceae.g\_\_Streptococcus

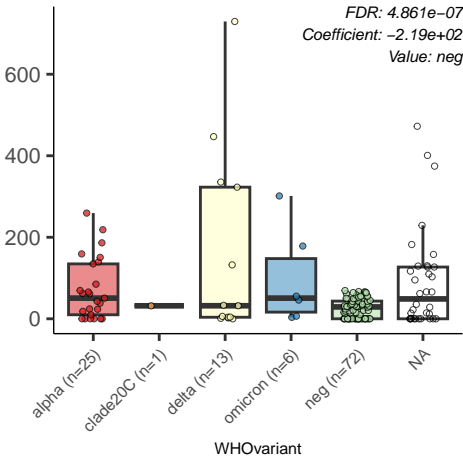



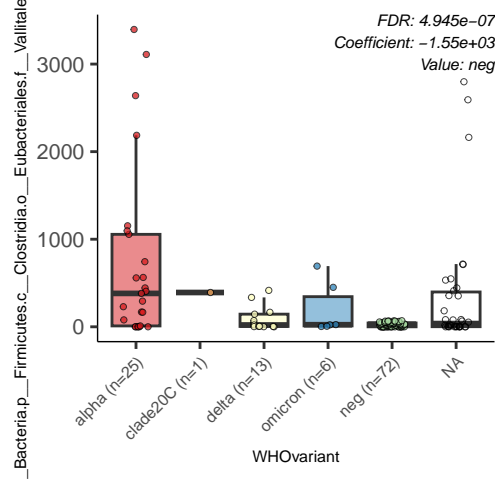

Bacteria.p\_\_Tenericutes.c\_\_Mollicutes.o\_\_Entomoplasmatales.f

FDR:  $4.951e-07$   
Coefficient:  $-4.19e+02$   
Value: delta

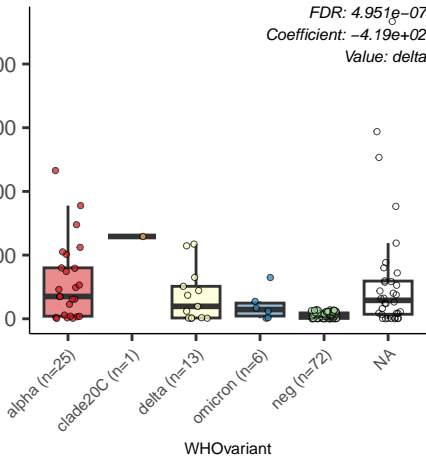

ia.p\_\_Tenericutes.c\_\_Mollicutes.o\_\_Entomoplasmatales.f\_\_Spiroplasma

FDR:  $4.951e-07$   
Coefficient:  $-4.19e+02$   
Value: delta

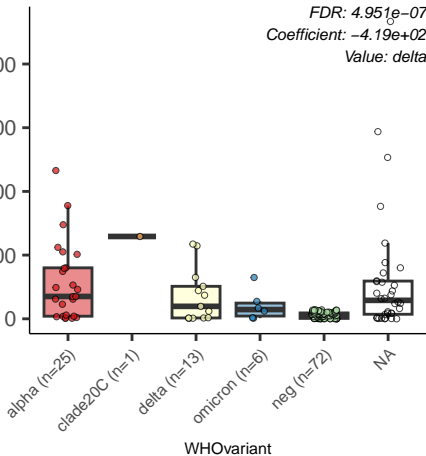

d\_Bacteria.p\_Firmicutes.c\_Clostridia.o\_Eubacteriales.f\_Desu

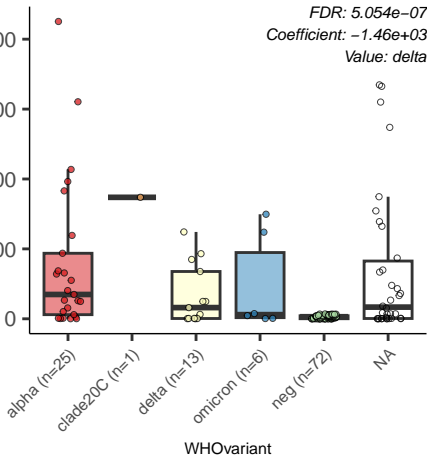

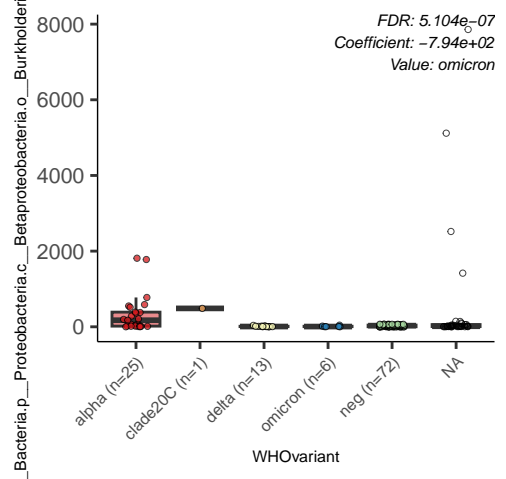

*FDR: 5.189e-07*  
*Coefficient: -4.78e+02*  
*Value: neg*

1000

500

0

alpha (n=25)

clade20C (n=1)

delta (n=13)

omicron (n=6)

neg (n=72)

NA

WHOvariant

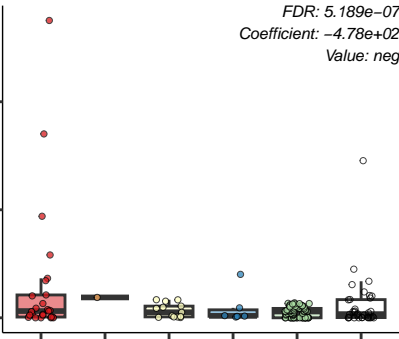

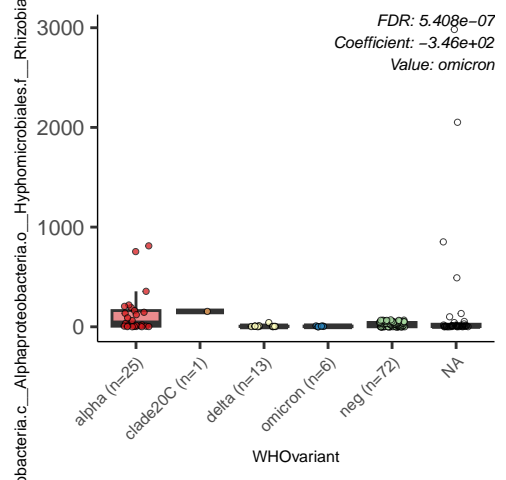

ria.p\_\_Bacteroidetes.c\_\_Flavobacteriia.o\_\_Flavobacteriales.f\_\_Flav

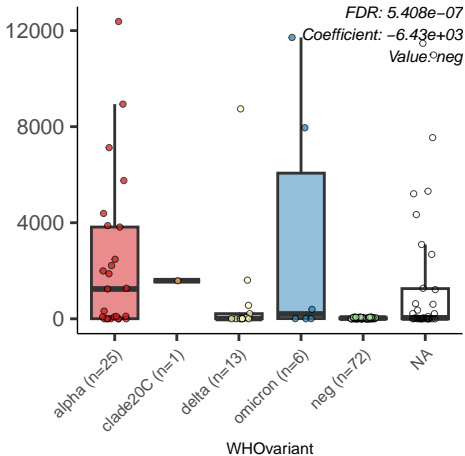





bacteria.p\_\_Firmicutes.c\_\_Clostridia.o\_\_Eubacteriales.f\_\_Oscillospir

*FDR: 5.408e-07*  
*Coefficient: -2.49e+03*  
*Value: neg*

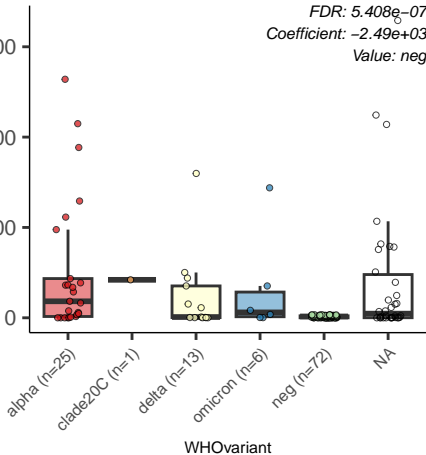

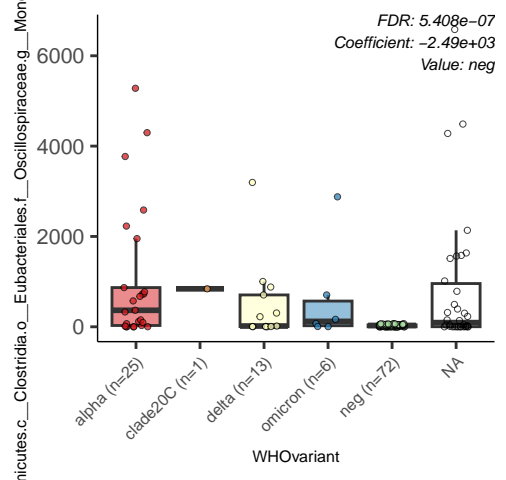

p\_\_Planctomycetes.c\_\_Planctomycetia.o\_\_Planctomycetales.f\_\_Pla

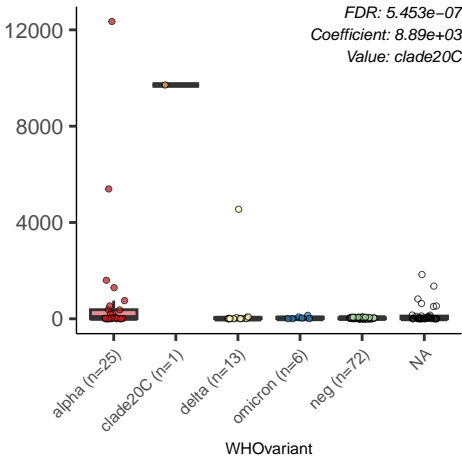

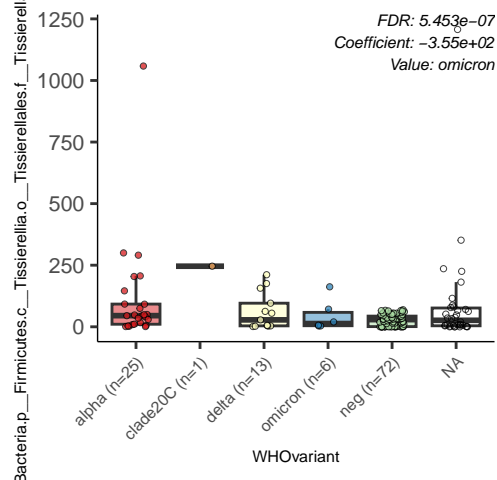

Firmicutes.c\_\_Tissierellia.o\_\_Tissierellales.f\_\_Tissierellaceae.g\_\_G

*FDR: 5.453e-07*  
*Coefficient: -3.55e+02*  
*Value: omicron*

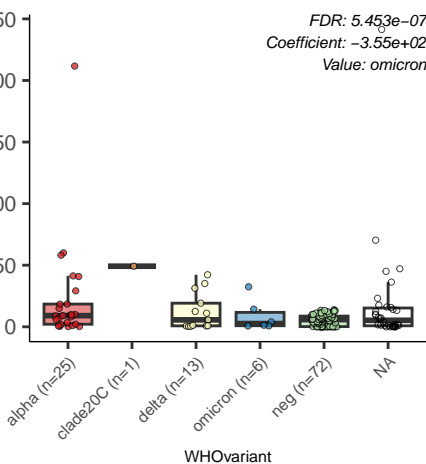

Firmicutes.c\_\_Clostridia.o\_\_Thermoanaerobacterales.f\_\_Thermo

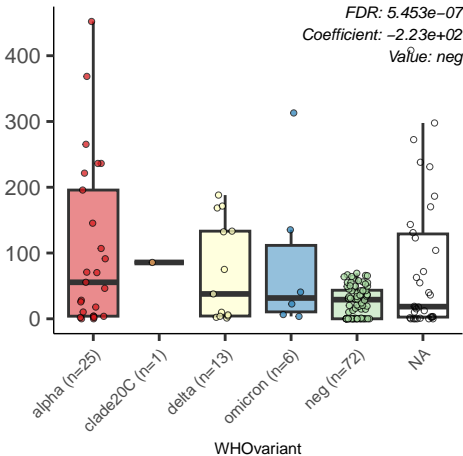

Bacteria.p\_Planctomycetes.c\_Planctomycetia.o\_Pirellulales.f

FDR: 5.477e-07  
Coefficient: -2.34e+03  
Value: neg

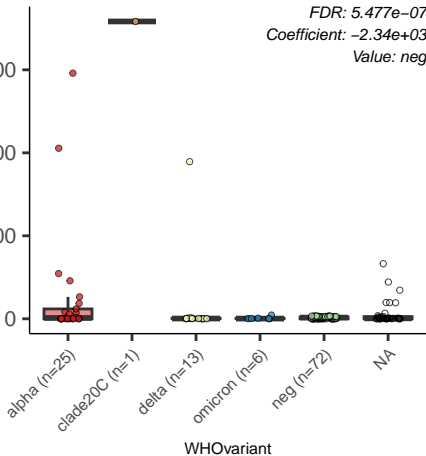



FDR: 5.477e-07  
Coefficient: -2.34e+03  
Value: neg

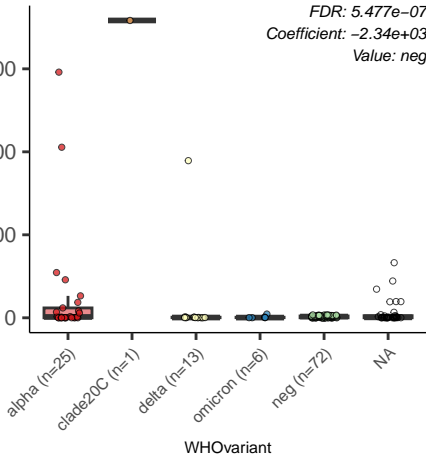

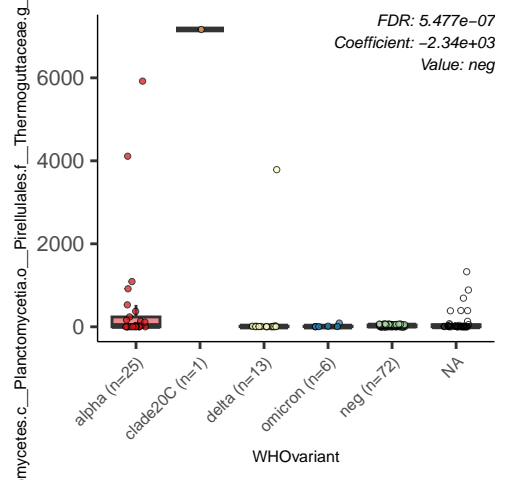

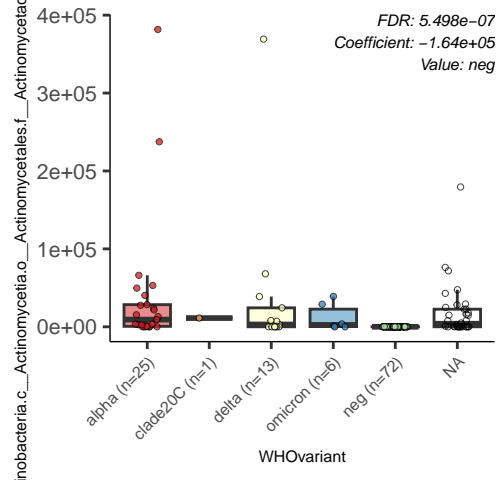

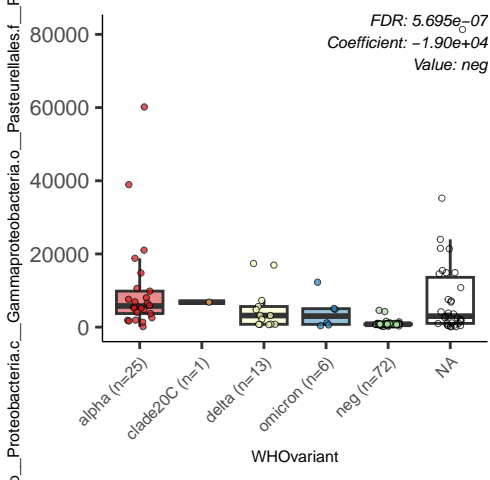

bacteria.p\_Firmicutes.c\_Clostridia.o\_Eubacteriales.f\_Lachnosp

*FDR: 5.696e-07*  
*Coefficient: -1.56e+04*  
*Value: delta*

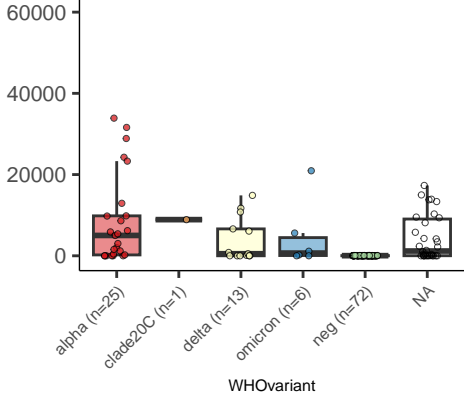

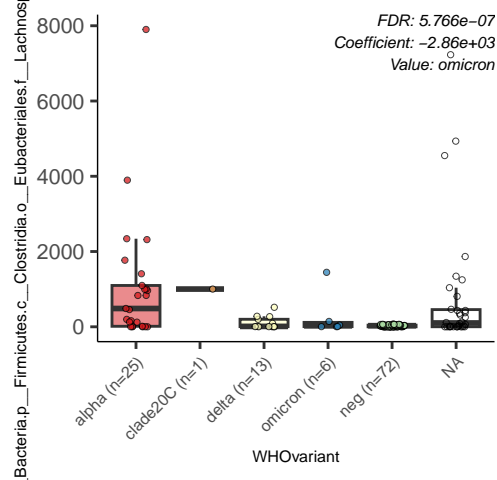

p\_Firmicutes.c\_\_Clostridia.o\_\_Eubacteriales.f\_\_Lachnospiraceae

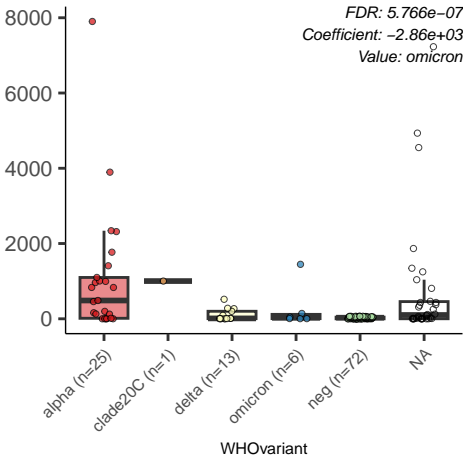

bacteria.c\_Actinomycetia.o\_Actinomycetales.f\_Actinomycetaceae

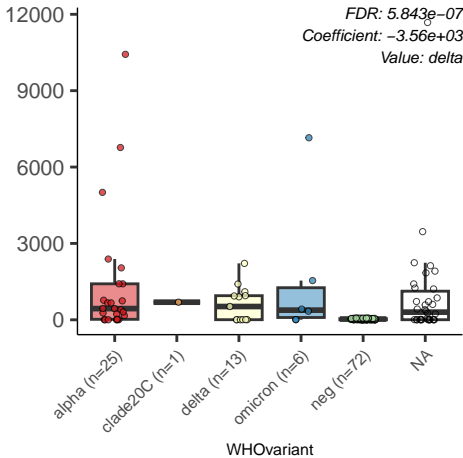



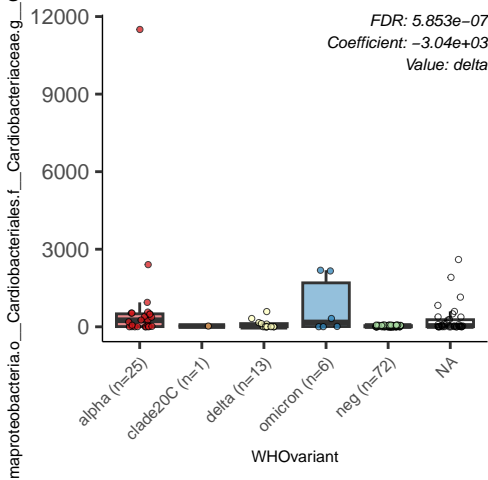

d\_Bacteria.p\_Firmicutes.c\_Clostridia.o\_Eubacteriales.f\_Des

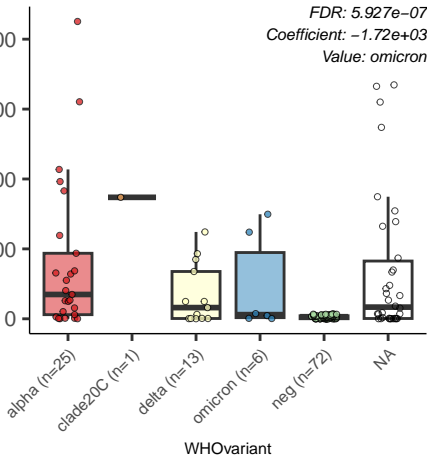

Proteobacteria.c\_\_Betaproteobacteria.o\_\_Burkholderiales.f\_\_Com

FDR:  $6.037e-07$   
Coefficient:  $-8.19e+02$   
Value: omicron

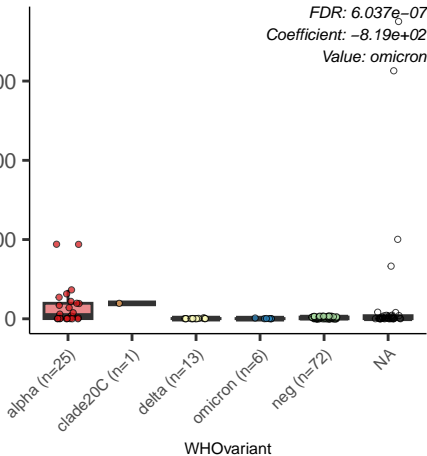

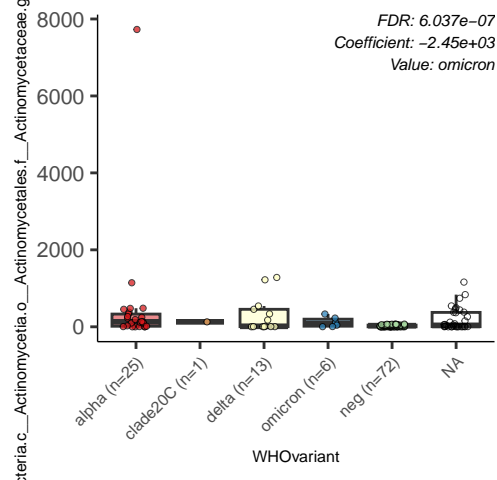

cutes.c\_\_Clostridia.o\_\_Eubacteriales.f\_\_Lachnospiraceae.g\_\_Lachnospiraceae

$FDR: 6.058e-07$   
 $Coefficient: -4.65e+02$   
 $Value: neg$

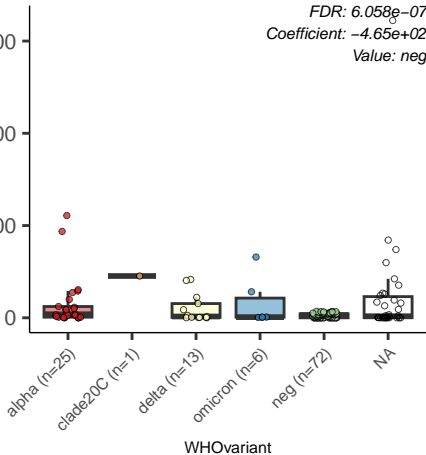

iria.p\_\_Tenericutes.c\_\_Mollicutes.o\_\_Mycoplasmales.f\_\_Mycoplasma

FDR:  $6.162 \times 10^{-7}$   
Coefficient:  $-3.55 \times 10^3$   
Value: neg

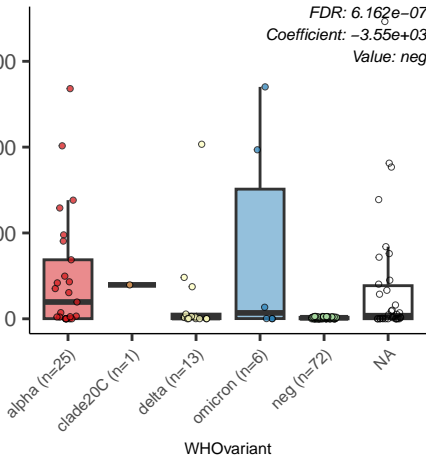

eria.p\_Firmicutes.c\_Clostridia.o\_Eubacteriales.f\_Oscillospirac

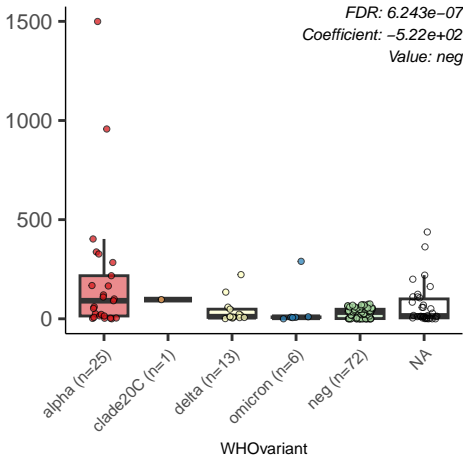

s.c.\_Clostridia.o\_Eubacteriales.f\_Oscillospiraceae.g\_Ruthenib

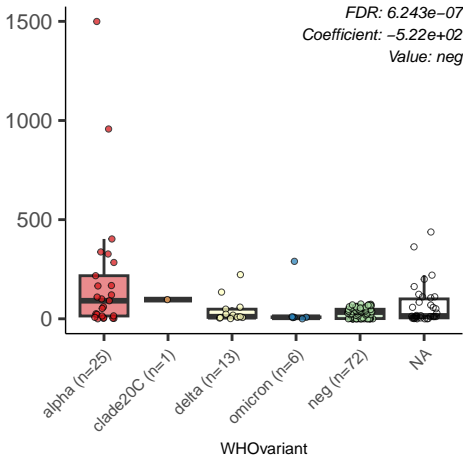



Betaproteobacteria.o\_\_Burkholderiales.f\_\_Comamonadaceae.g

FDR:  $6.318e-07$   
Coefficient:  $-8.05e+02$   
Value: omicron

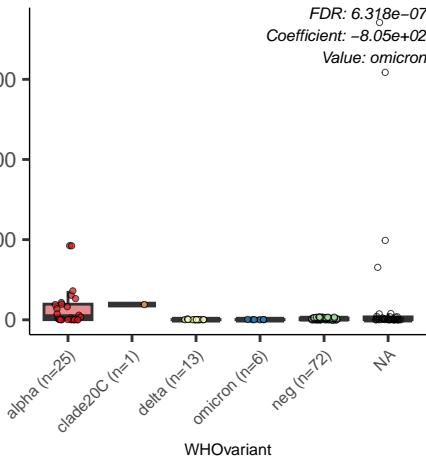

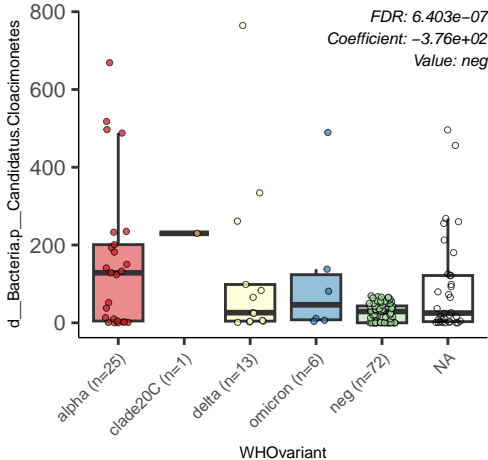

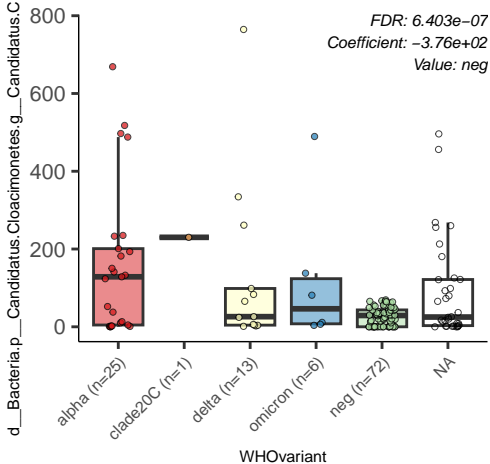

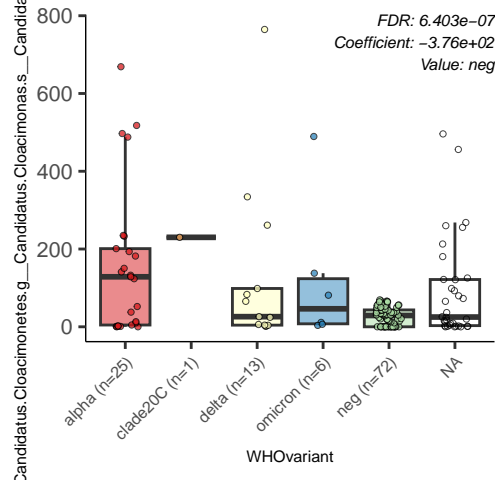

d\_\_Bacteria.p\_\_Cyanobacteria.o\_\_Pseudanabaenales.f\_\_Lept

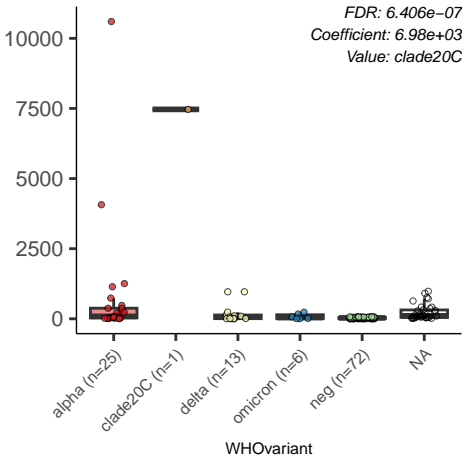

Firmicutes.c\_\_Bacilli.o\_\_Lactobacillales.f\_\_Streptococcaceae.g\_\_St

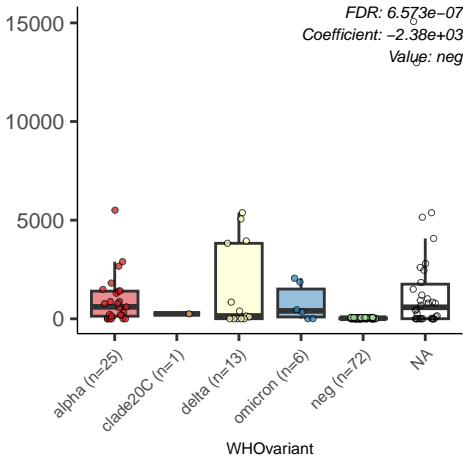

d\_Bacteria.p\_Bacteroidetes.c\_Bacteroidia.o\_Marinifilum

FDR:  $6.647 \times 10^{-7}$   
Coefficient:  $-9.77 \times 10^2$   
Value: neg

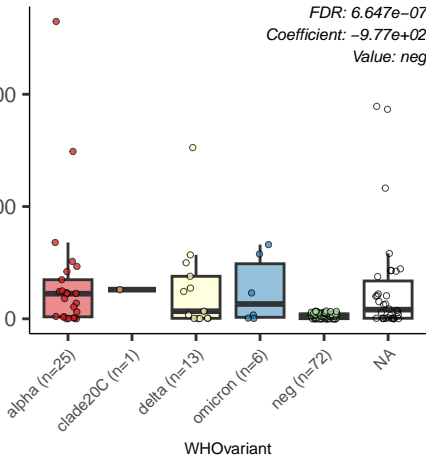

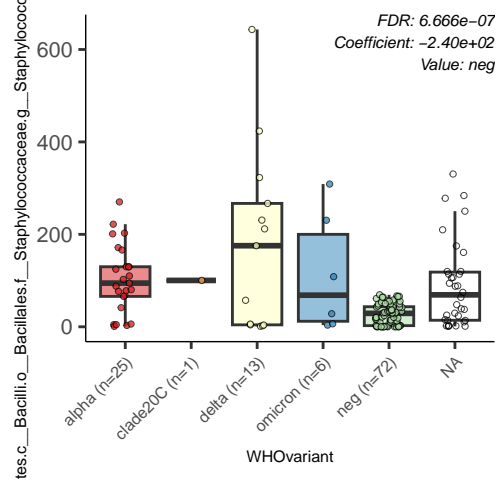



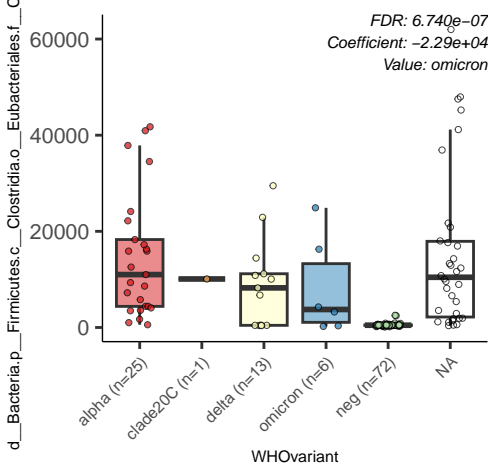

bacteria.p\_\_Cyanobacteria.o\_\_Pseudanabaenales.f\_\_Leptolyngbya

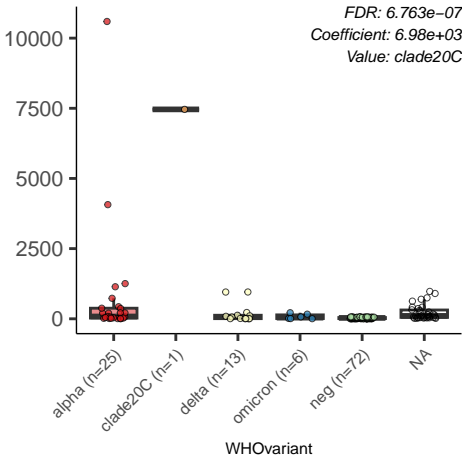

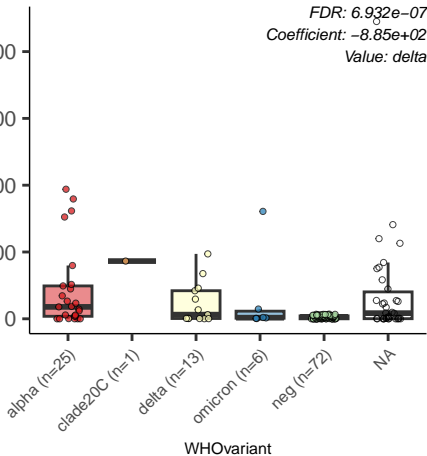

Bacteria.p\_Firmicutes.c\_Bacilli.o\_Lactobacillales.f\_Aerococca

FDR:  $6.992e-07$   
Coefficient:  $-5.52e+02$   
Value: neg

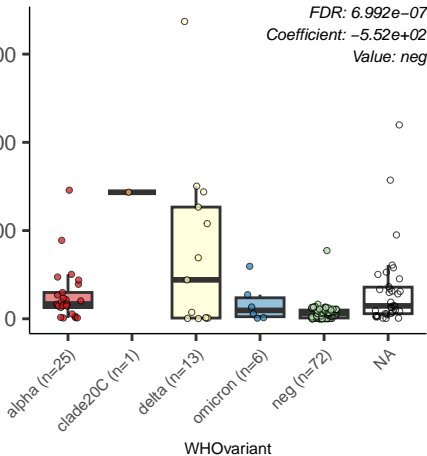

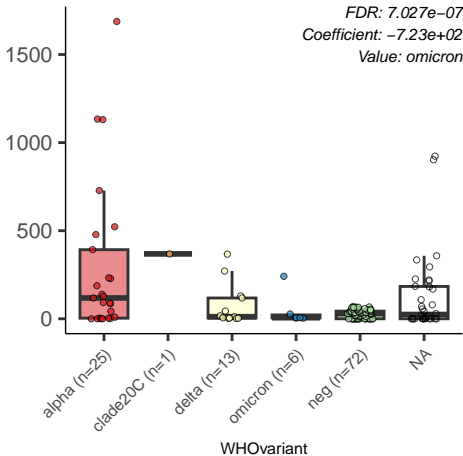

Cyanobacteria.o\_\_Pseudanabaenales.f\_\_Leptolyngbyaceae.g\_\_Lep

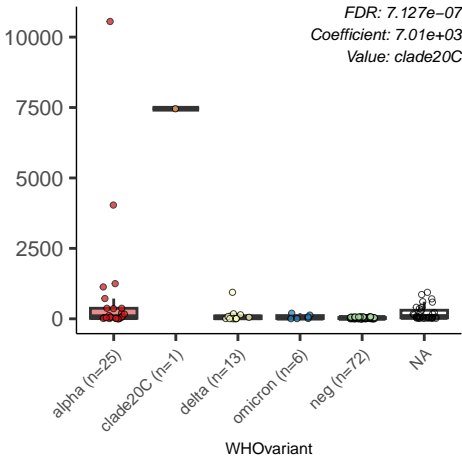

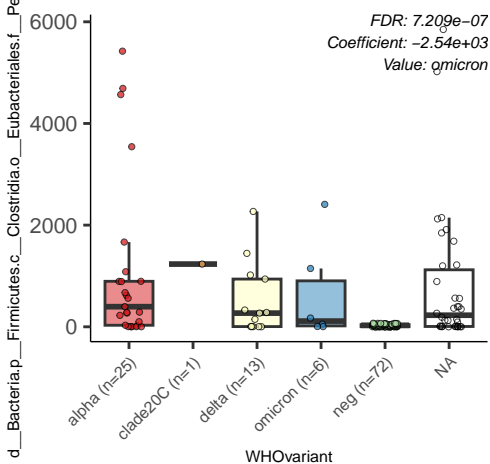

omyces.c\_\_Planctomycetia.o\_\_Planctomycetales.f\_\_Planctomycet

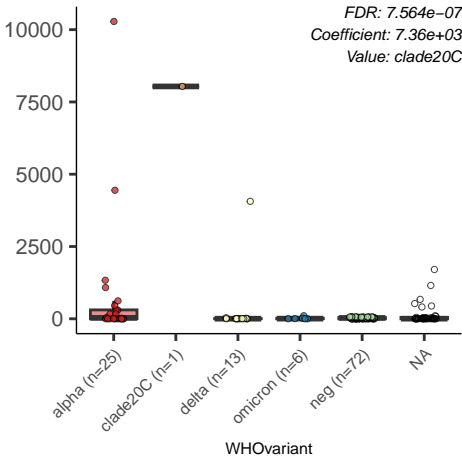



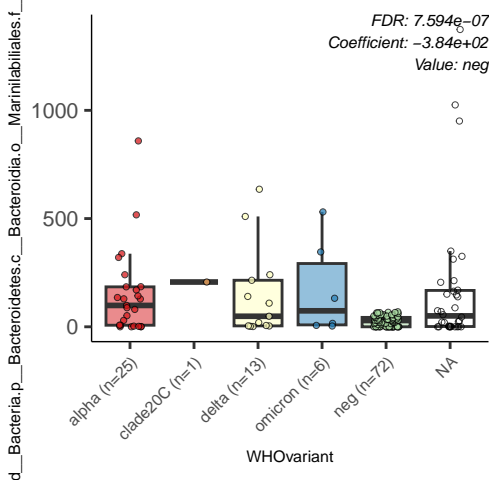

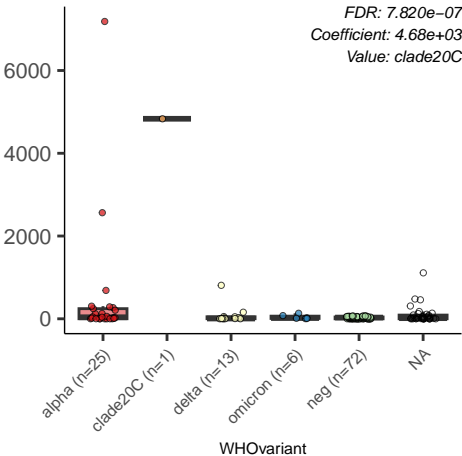

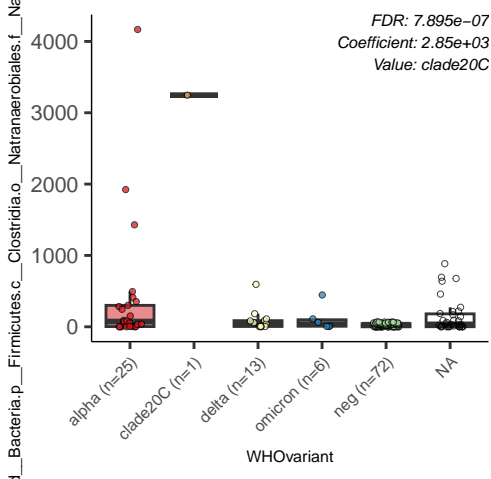

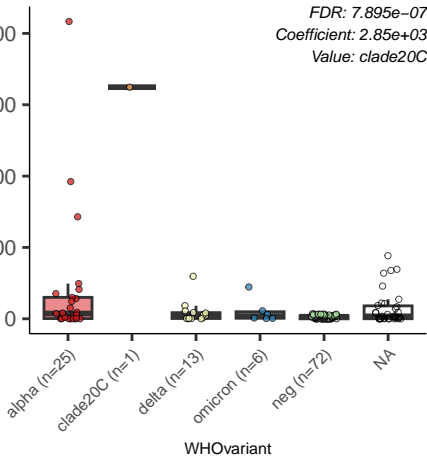

Value: clade20C

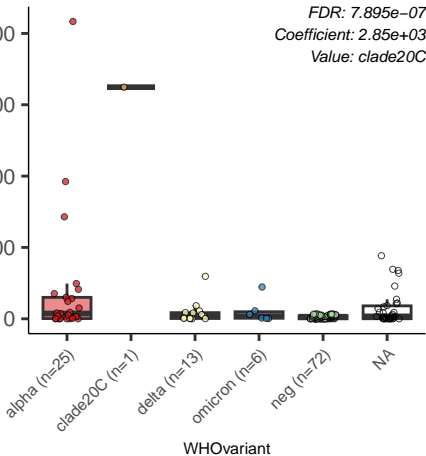

rmicutes.c\_\_Clostridia.o\_\_Eubacteriales.f\_\_Lachnospiraceae.g\_\_Ar

*FDR: 8.290e-07*  
*Coefficient: -1.56e+03*  
*Value: delta*

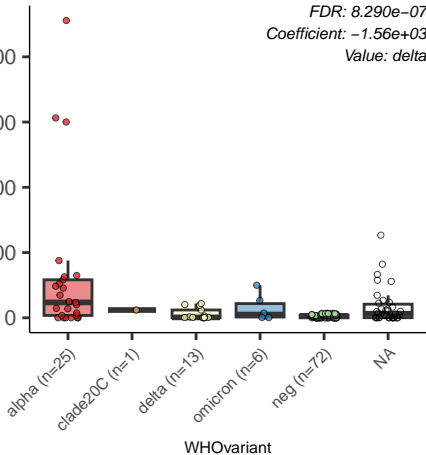

\_\_Bacteria.p\_\_Bacteroidetes.c\_\_Flavobacteriia.o\_\_Flavobacteriales

FDR:  $8.359e-07$   
Coefficient:  $-3.25e+02$   
Value: neg

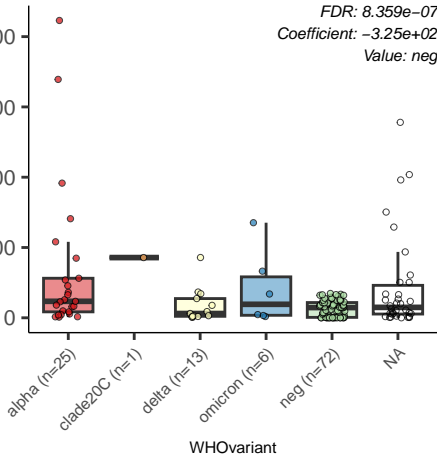

Bacteria.p\_Actinobacteria.c\_Actinomycetia.o\_Corynebacteriales

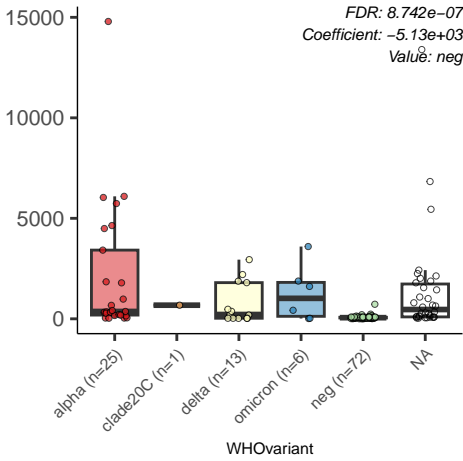



irmicutes.c\_\_Bacilli.o\_\_Lactobacillales.f\_\_Streptococcaceae.g\_\_Str

FDR:  $9.260e-07$   
Coefficient:  $-1.32e+03$   
Value: omicron

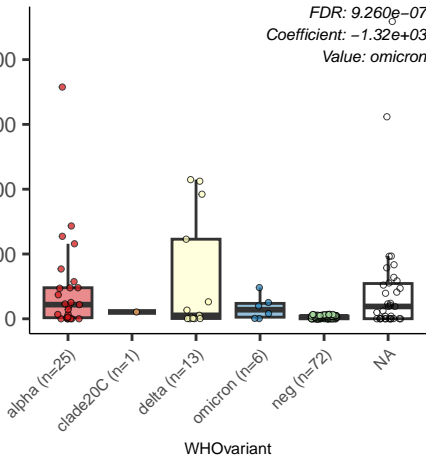

charimonadia.o\_\_Candidatus.Nanosynbacterales.f\_\_Candidatus.Na

$FDR: 9.420e-07$   
 $Coefficient: -3.80e+04$   
 $Value: neg$

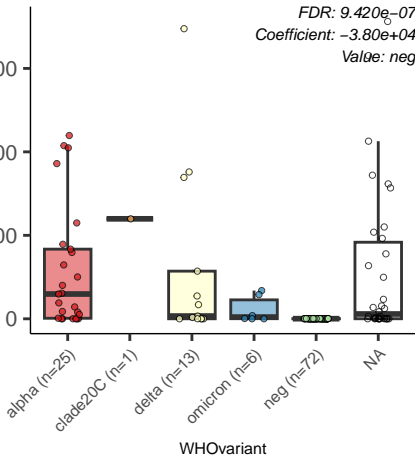

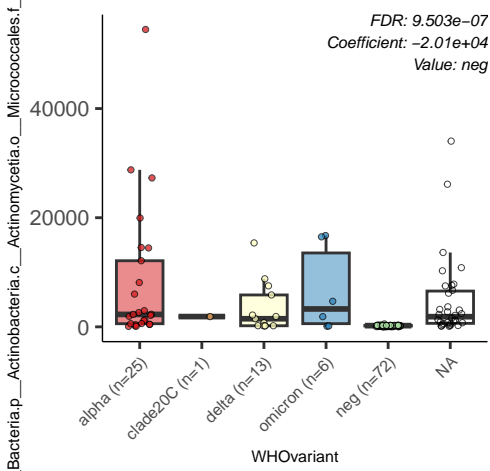

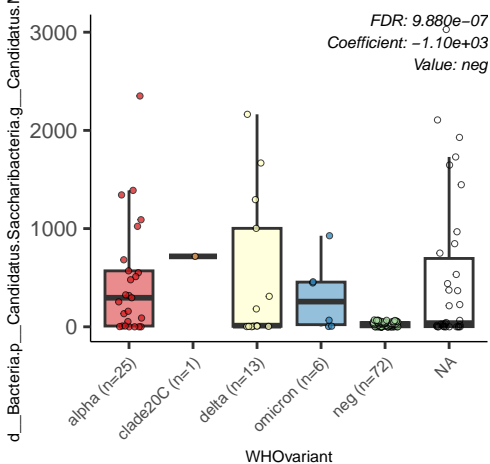



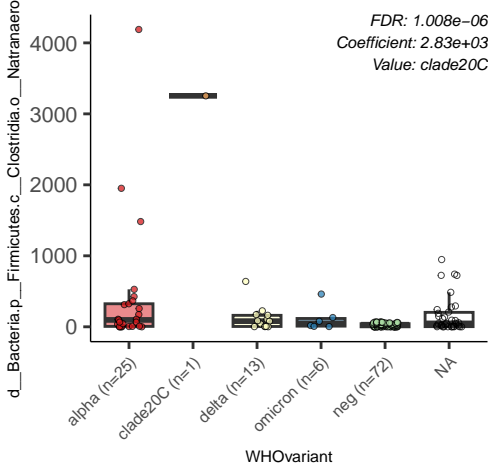

d\_\_Bacteria.p\_\_Firmicutes.c\_\_Clostridia.o\_\_Eubacteriales.f\_\_Pr

FDR: 1.013e-06  
Coefficient: -5.08e+02  
Value: delta

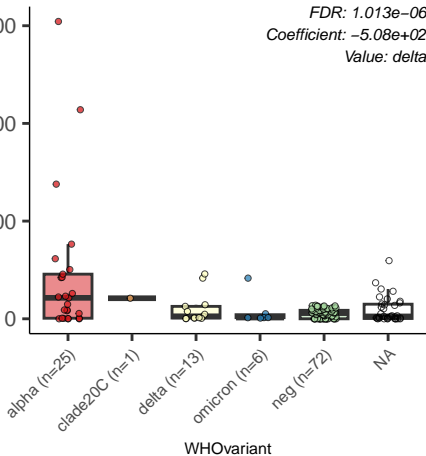

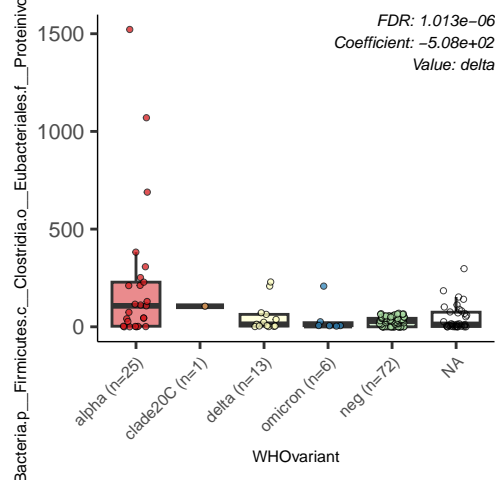



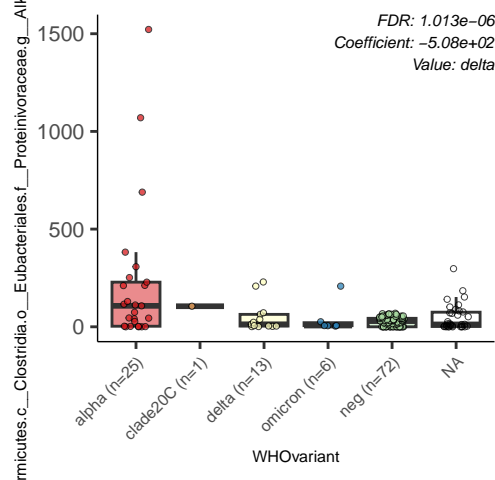

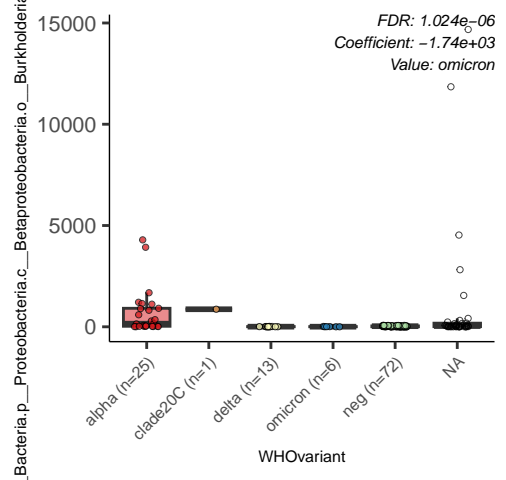

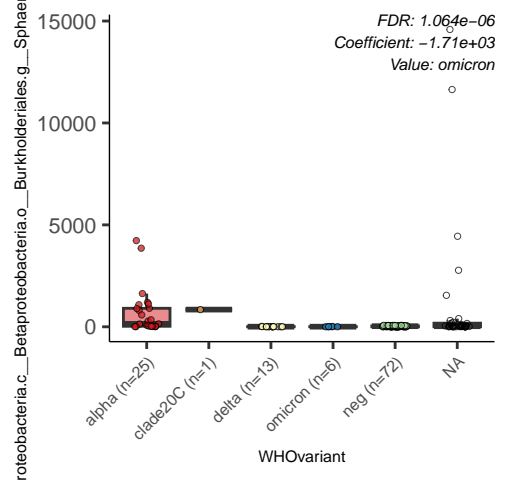

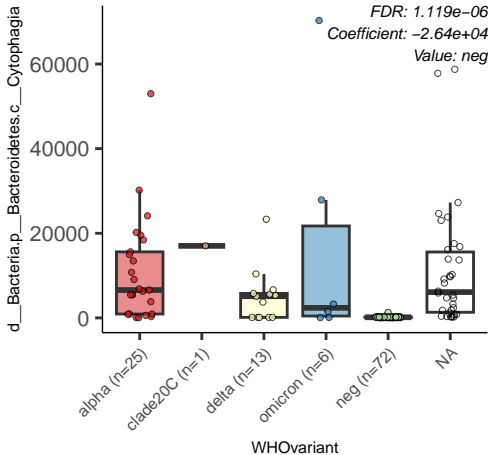

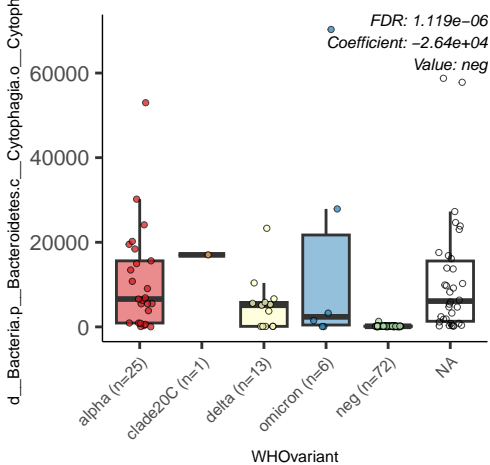

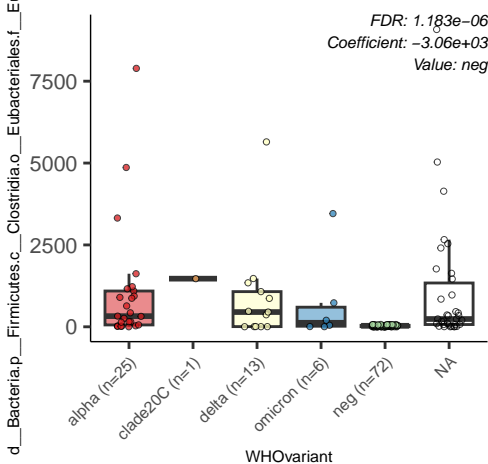

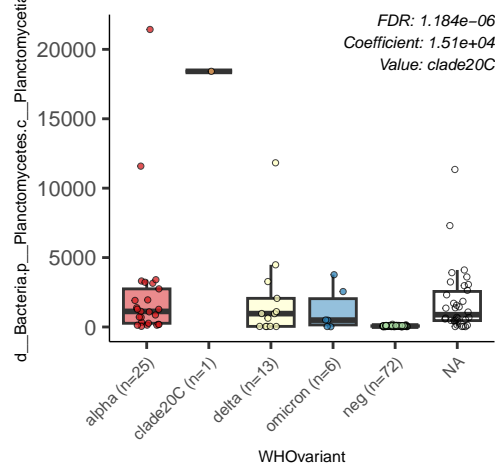

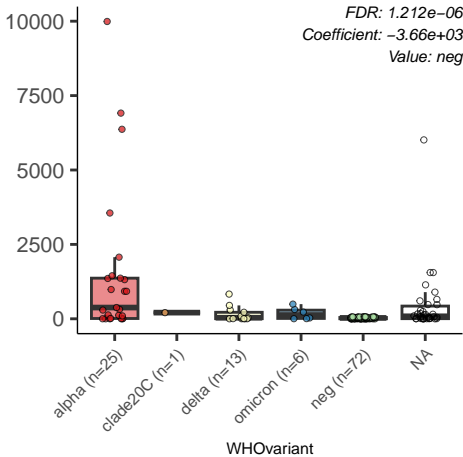



.p\_\_Proteobacteria.c\_\_Betaproteobacteria.o\_\_Burkholderiales.f\_\_C

FDR:  $1.240e-06$   
Coefficient:  $-1.68e+03$   
Value: delta

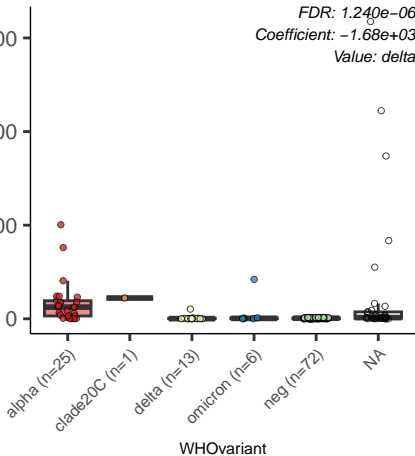

Bacteria.p\_Bacteroidetes.c\_Flavobacteriia.o\_Flavobacteriales.g

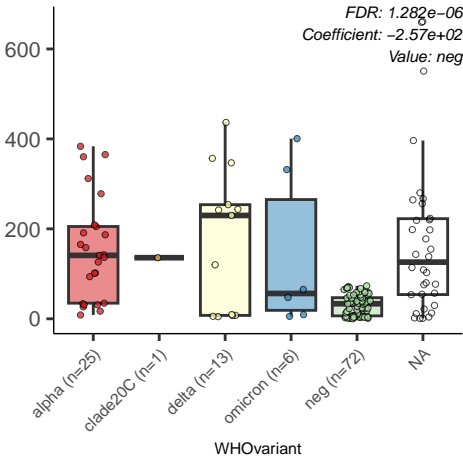



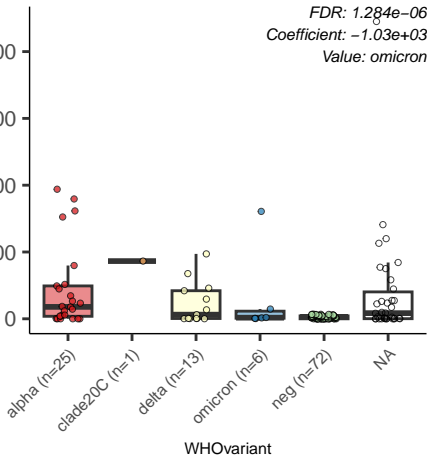

Actinomycetia.o\_\_Pseudonocardiales.f\_\_Pseudonocardaceae.g\_\_S

FDR: 1.323e-06  
Coefficient: -2.51e+03  
Value: omicron

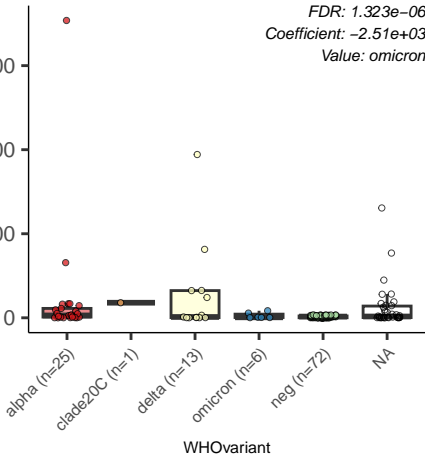

d\_Bacteria.p\_\_Planctomycetes.c\_\_Planctomycetia.o\_\_Plancto

FDR:  $1.414e-06$   
Coefficient:  $9.02e+03$   
Value: clade20C

10000

5000

0

alpha (n=25)

clade20C (n=1)

delta (n=13)

omicron (n=6)

neg (n=72)

NA

WHOvariant

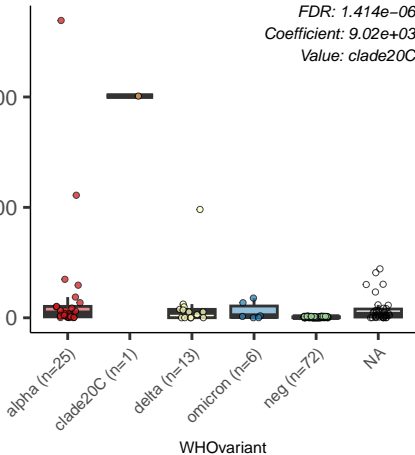

bacteria.p\_\_Planctomycetes.c\_\_Planctomycetia.o\_\_Planctomycetales

FDR:  $1.414e-06$   
Coefficient:  $9.02e+03$   
Value: clade20C

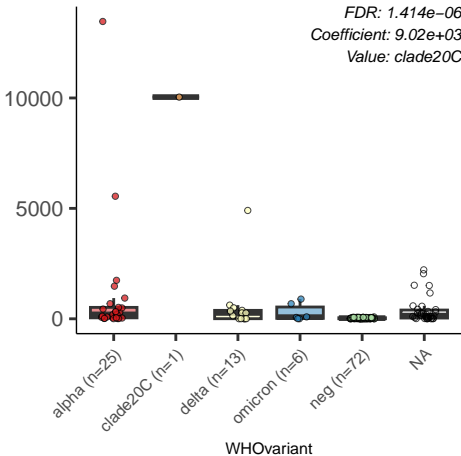

acteria.c\_\_Actinomycetia.o\_\_Actinomycetales.f\_\_Actinomycetaceae

FDR:  $1.456e-06$   
Coefficient:  $-4.07e+03$   
Value: neg

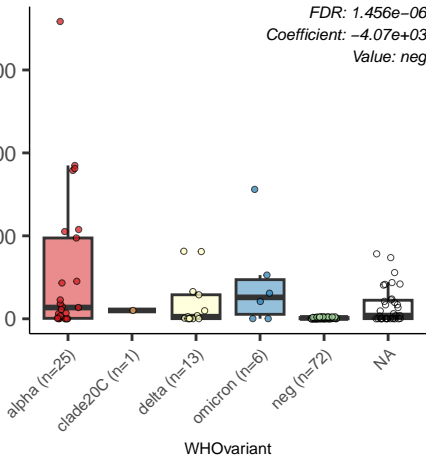



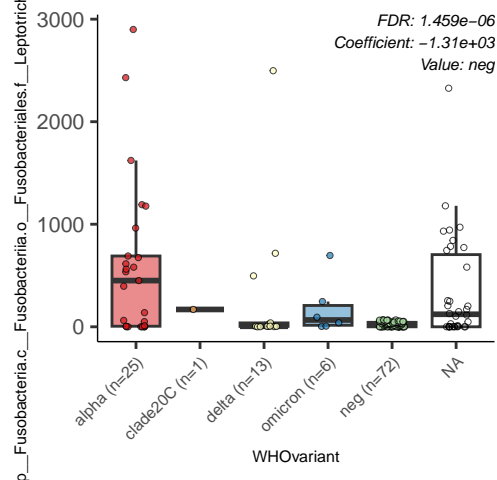

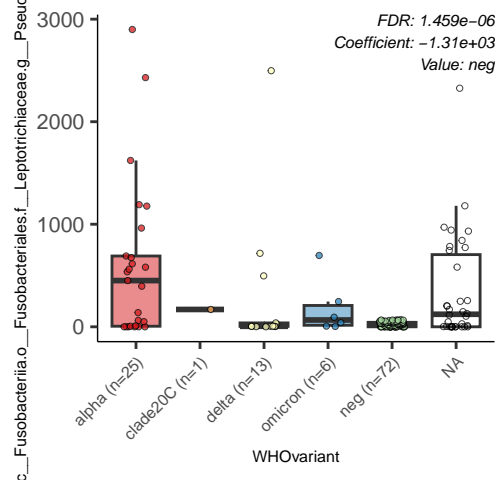

d\_\_Bacteria.p\_\_Planctomycetes

*FDR: 1.503e-06*  
*Coefficient: 1.51e+04*  
*Value: clade20C*

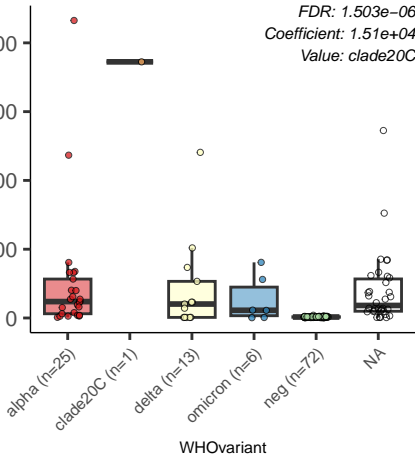

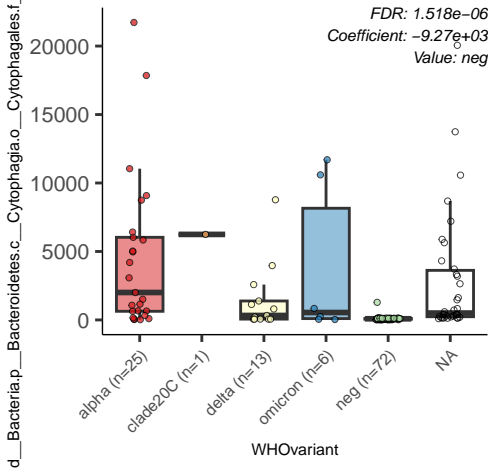

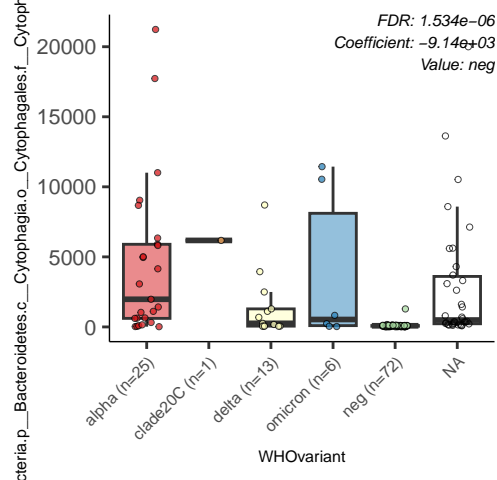

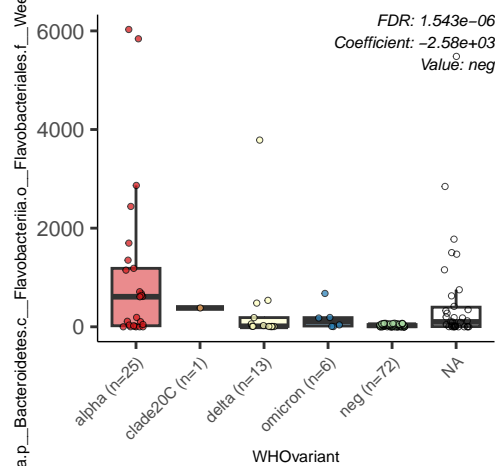

oidetes.c\_\_Flavobacteriia.o\_\_Flavobacteriales.f\_\_Weeksellaceae.g

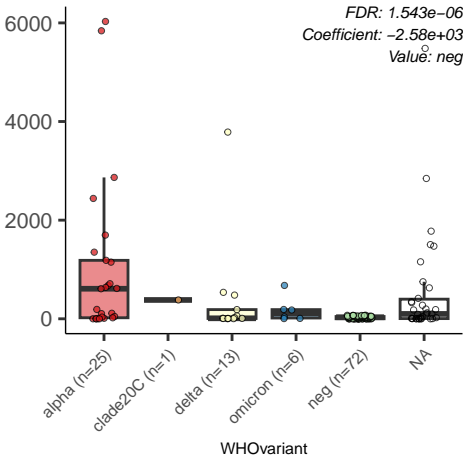

p\_\_Bacteroidetes.c\_\_Chitinophagia.o\_\_Chitinophagales.f\_\_Chitinop

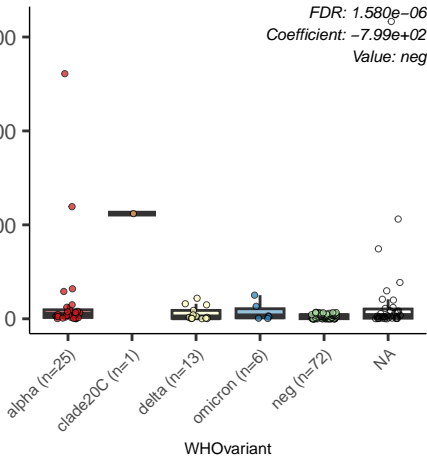



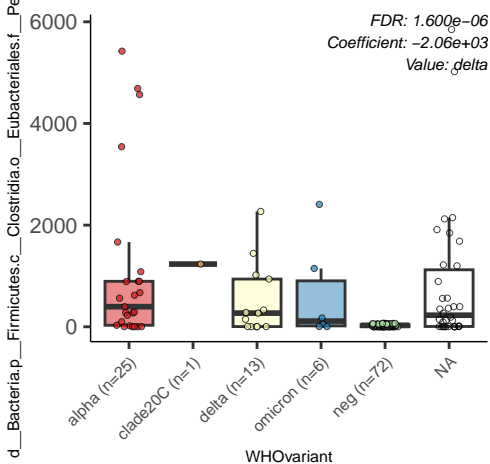



es.c\_\_Spirochaetia.o\_\_Spirochaetales.f\_\_Treponemataceae.g\_\_Tre

*FDR: 1.676e-06*  
*Coefficient: -8.26e+02*  
*Value: neg*

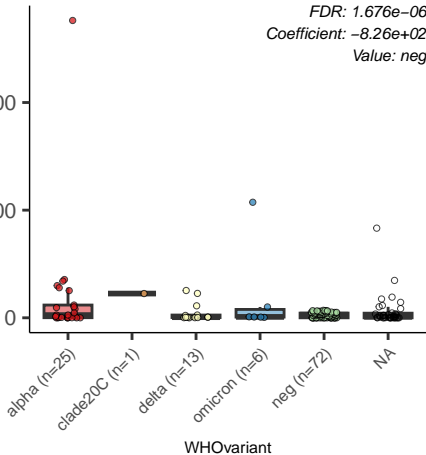

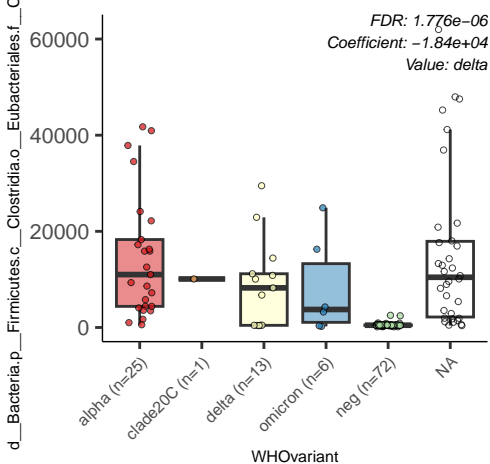

d\_Bacteria.p\_\_Proteobacteria.c\_\_Deltaproteobacteria.o\_\_Des

FDR:  $1.794e-06$   
Coefficient:  $-2.95e+03$   
Value: neg

10000

5000

0

alpha (n=25)

clade20C (n=1)

delta (n=13)

omicron (n=6)

neg (n=72)

NA

WHOvariant

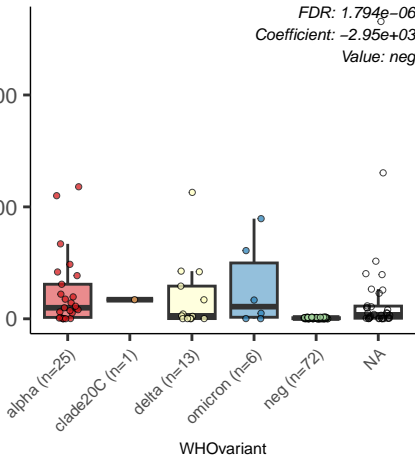

ctinobacteria.c\_\_Actinomycetia.o\_\_Pseudonocardiales.f\_\_Pseudonoc

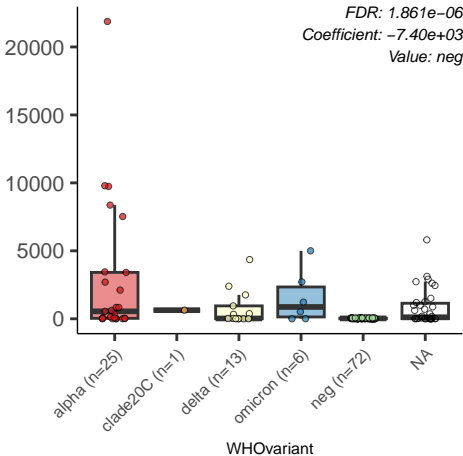

acteria.c\_Actinomycetia.o\_Actinomycetales.f\_Actinomycetaceae.g

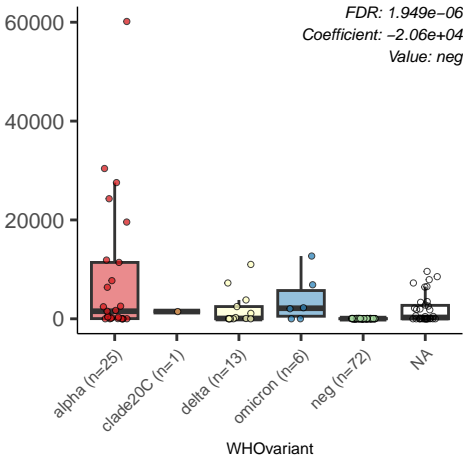

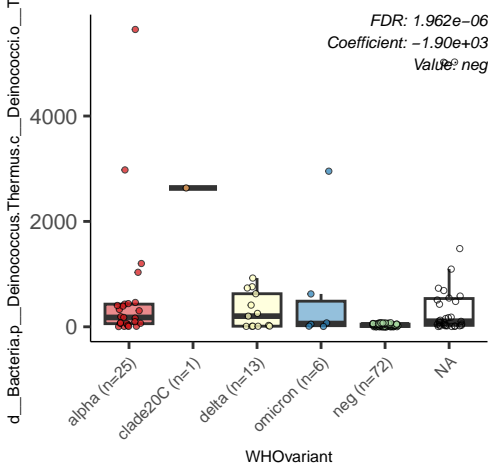



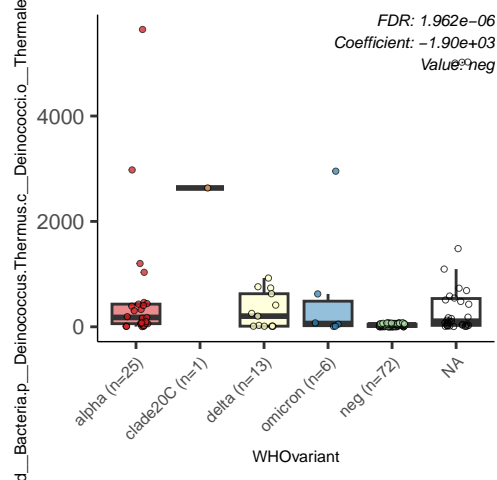

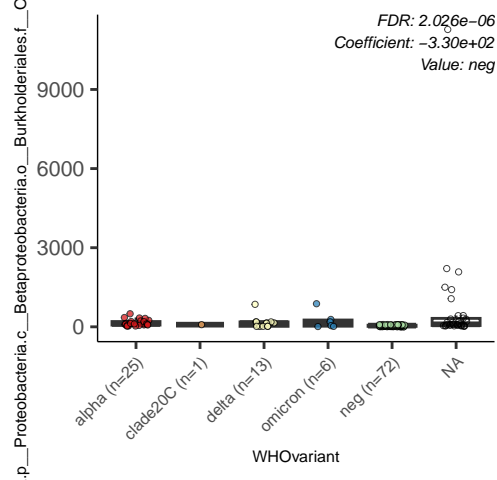

\_\_Bacteria.p\_\_Fusobacteria.c\_\_Fusobacteriia.o\_\_Fusobacteriales.f

FDR: 2.057e-06  
Coefficient: -4.79e+05  
Value: neg

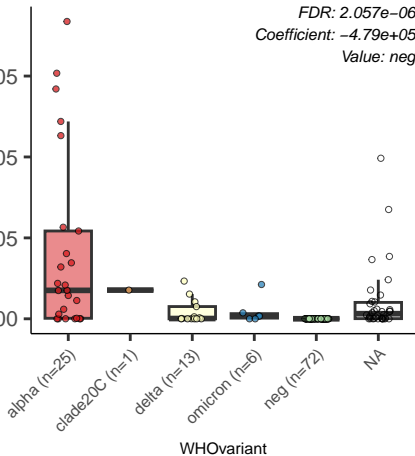

Firmicutes.c\_\_Bacilli.o\_\_Lactobacillales.f\_\_Streptococcaceae.g\_\_Str

*FDR: 2.084e-06*  
*Coefficient: -1.43e+04*  
*Value: neg*

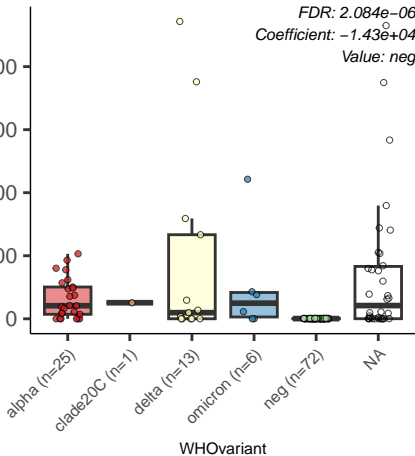

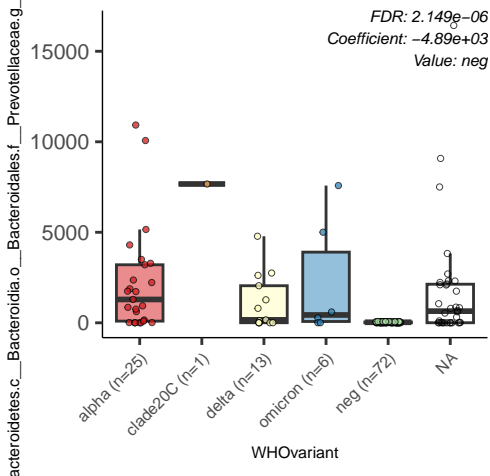

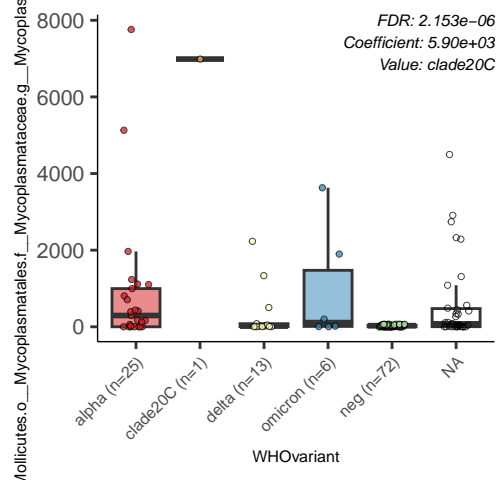

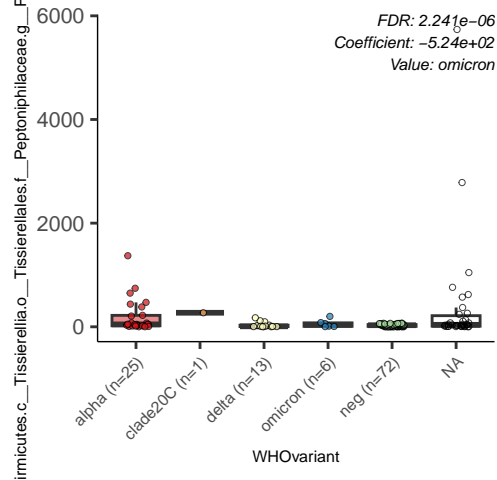

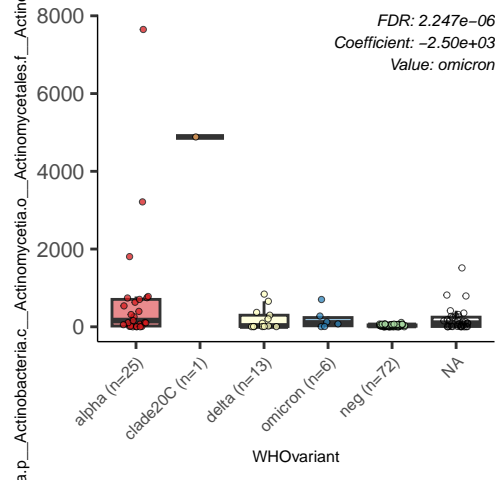



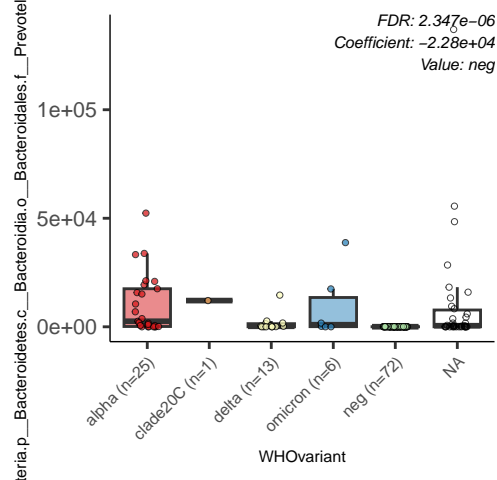

FDR:  $2.347e-06$   
Coefficient:  $-2.28e+04$   
Value: neg

1e+05

5e+04

0e+00

alpha (n=25)

clade20C (n=1)

delta (n=13)

omicron (n=6)

neg (n=72)

NA

WHOvariant

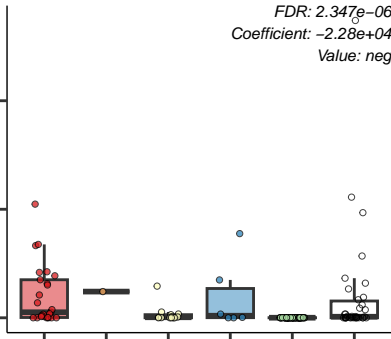

i.p.\_Bacteroidetes.c\_Flavobacteriia.o\_Flavobacteriales.f\_Weeks

FDR:  $2.383e-06$   
Coefficient:  $-3.54e+02$   
Value: omicron

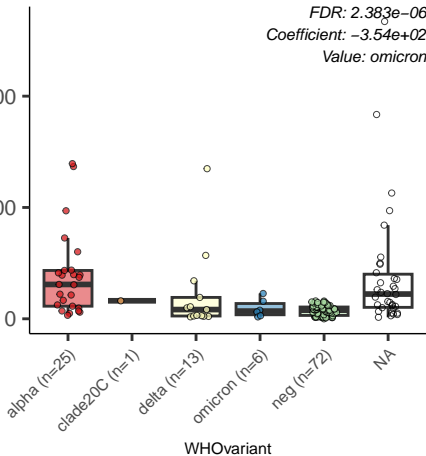

Bacteria.p\_\_Proteobacteria.c\_\_Betaproteobacteria.o\_\_Burkholderia

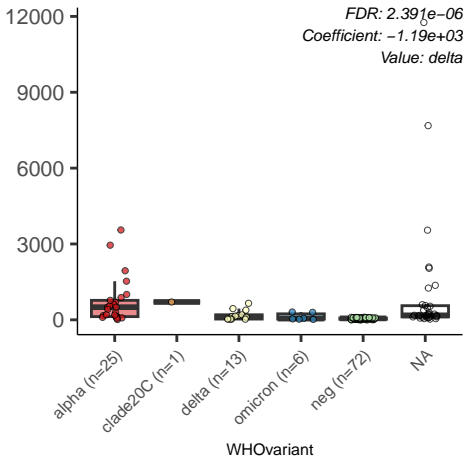

d\_\_Bacteria.p\_\_Firmicutes.c\_\_Tissierellia.g\_\_Ezakiell

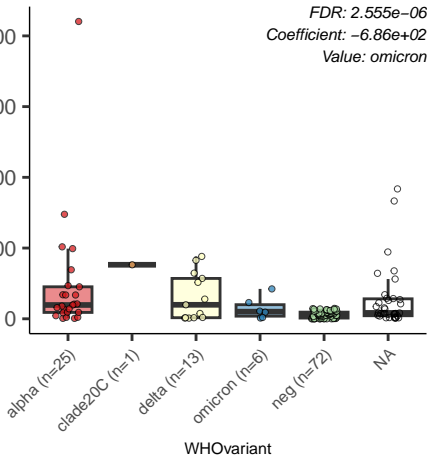

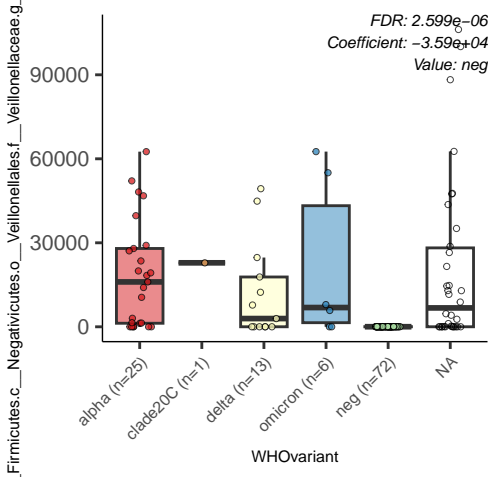

bacteria.p\_\_Firmicutes.c\_\_Clostridia.o\_\_Eubacteriales.f\_\_Lachnospir

*FDR: 2.719e-06*  
*Coefficient: -3.91e+03*  
*Value: delta*

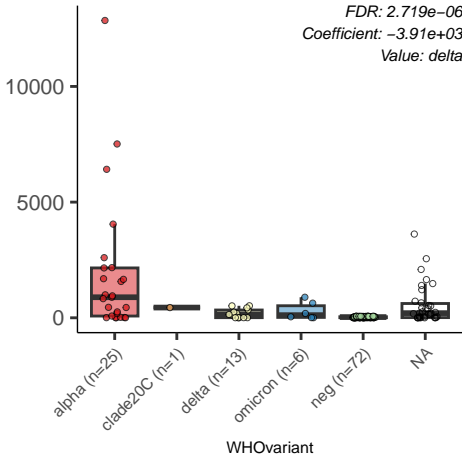

eria.p\_\_Firmicutes.c\_\_Clostridia.o\_\_Eubacteriales.f\_\_Oscillospira

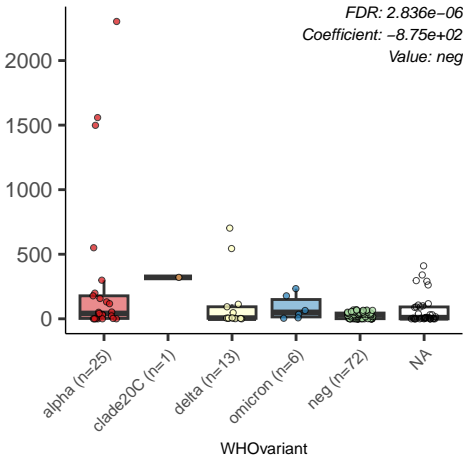



Clostridia.o\_\_Eubacteriales.f\_\_Oscillospiraceae.g\_\_Pseudoclostridium

FDR: 2.836e-06  
Coefficient: -8.75e+02  
Value: neg

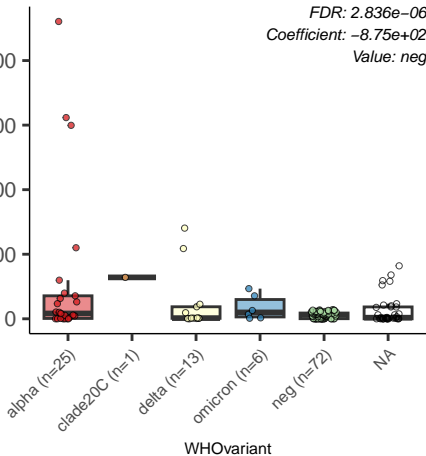

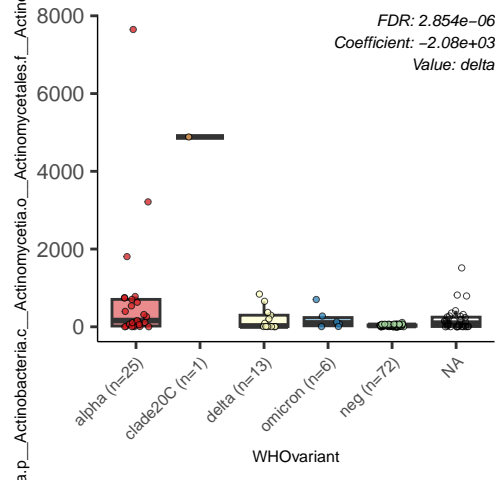

d\_\_Bacteria.p\_\_Firmicutes.c\_\_Clostridia.o\_\_Eubacteriales.f\_\_Pr

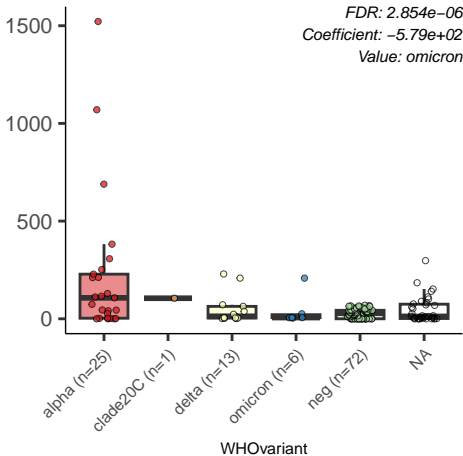

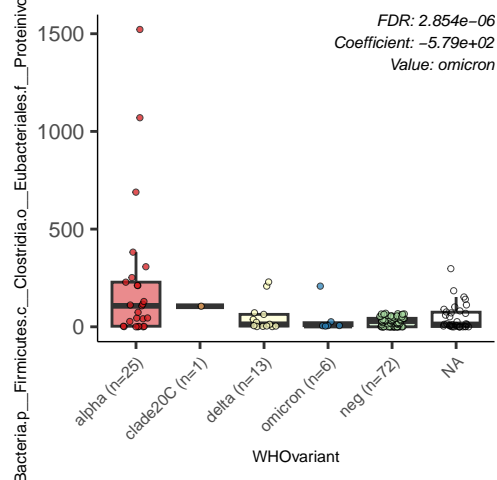

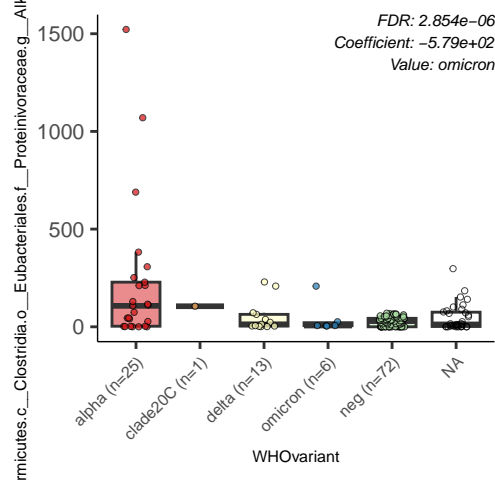

d\_\_Bacteria.p\_\_Acidobacteria.c\_\_Holophagae.o\_\_Acanthopile

*FDR: 2.895e-06*  
*Coefficient: -6.69e+02*  
*Value: delta*

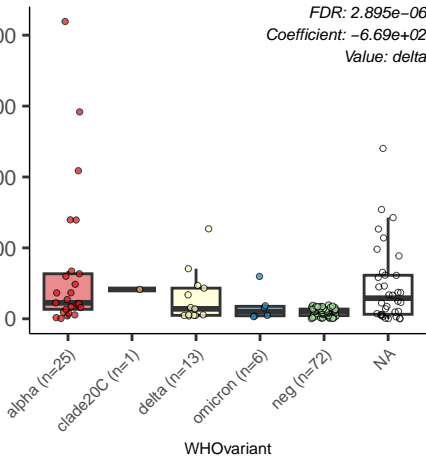

ia.p\_\_Acidobacteria.c\_\_Holophagae.o\_\_Acanthopleuribacteriales.f

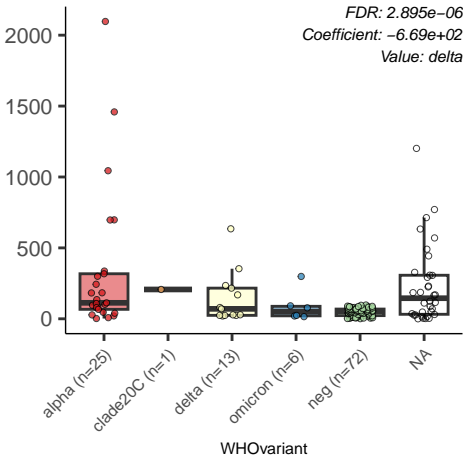

cidobacteria.c\_\_Holophagae.o\_\_Acanthopleuribacterales.f\_\_Acanth

*FDR: 2.895e-06*  
*Coefficient: -6.69e+02*  
*Value: delta*

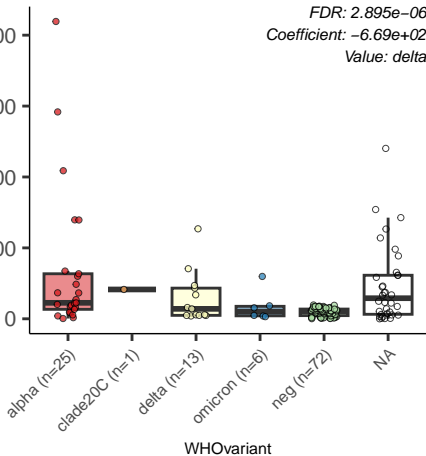



FDR:  $2.895e-06$   
Coefficient:  $-6.69e+02$   
Value: delta

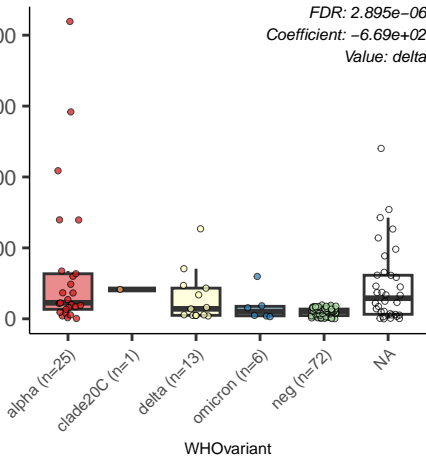

bacteria.p\_Firmicutes.c\_Clostridia.o\_Eubacteriales.f\_Lachnosp

60000  
40000  
20000  
0

alpha (n=25)

clade20C (n=1)

delta (n=13)

omicron (n=6)

neg (n=72)

NA

WHOvariant

FDR:  $2.994e-06$   
Coefficient:  $-1.73e+04$   
Value: omicron

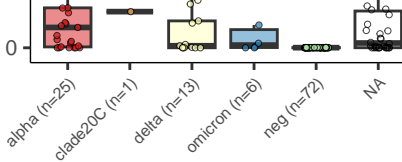

... Clostridia.o\_\_Eubacteriales.f\_\_Oscillospiraceae.g\_\_Caproicibact

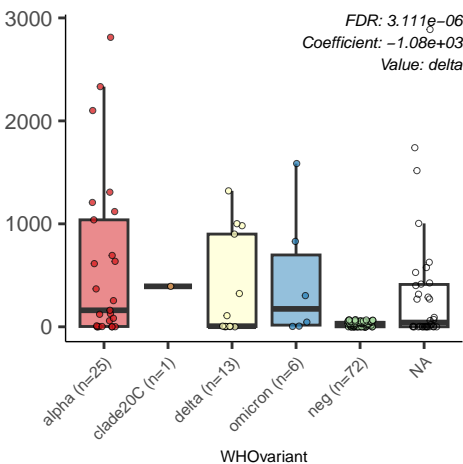

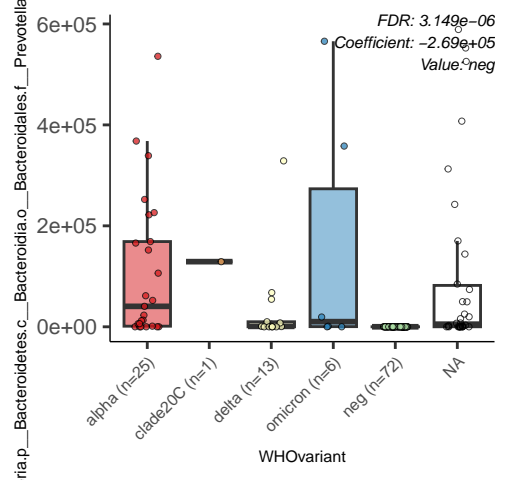

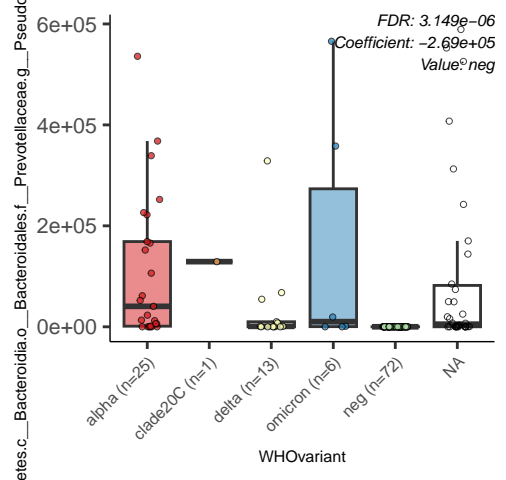

bacteria.p\_\_Firmicutes.c\_\_Clostridia.o\_\_Eubacteriales.f\_\_Lachnospir

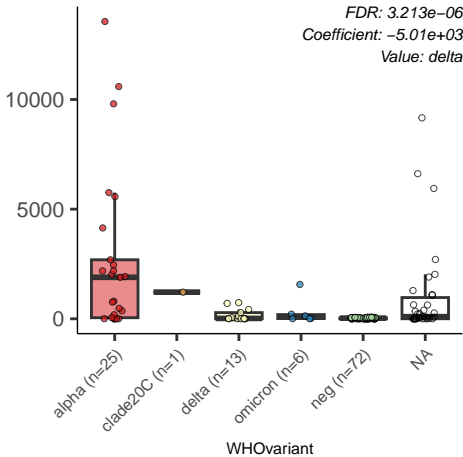

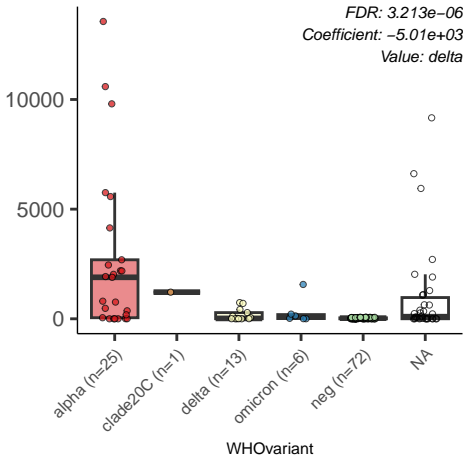

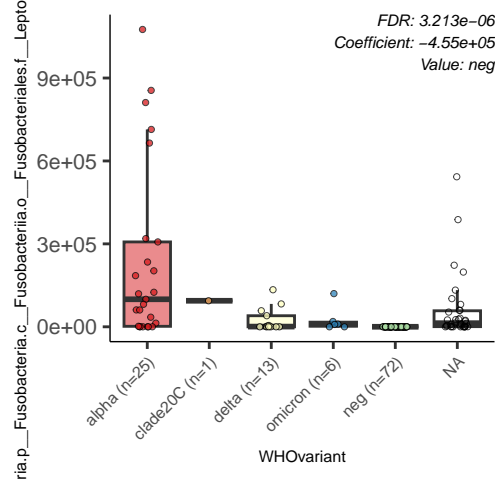



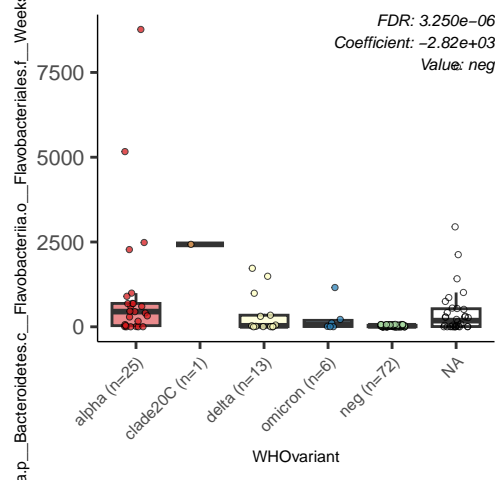

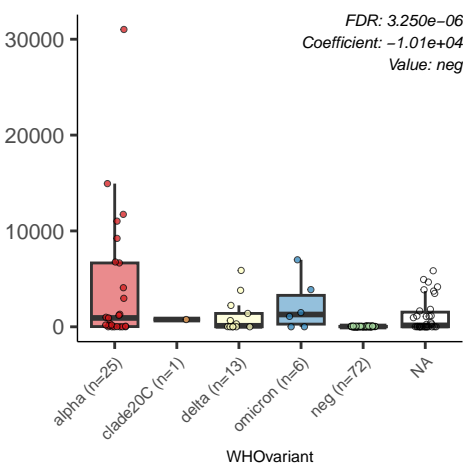

d\_Bacteria.p\_Firmicutes.c\_Tissierellia.g\_Ezakiella.s\_Ezak

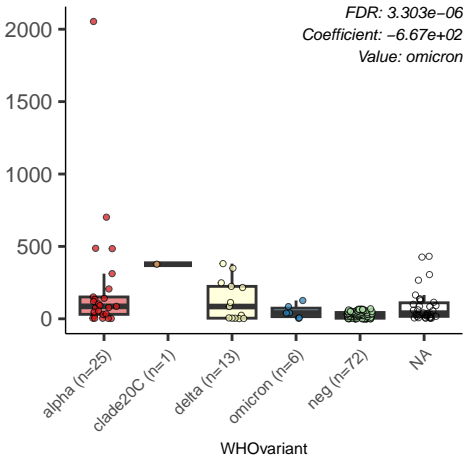

... Clostridia.o\_\_Eubacteriales.f\_\_Oscillospiraceae.g\_\_Caproicibact

FDR:  $3.341 \times 10^{-6}$   
Coefficient:  $-1.28 \times 10^3$   
Value: omicron

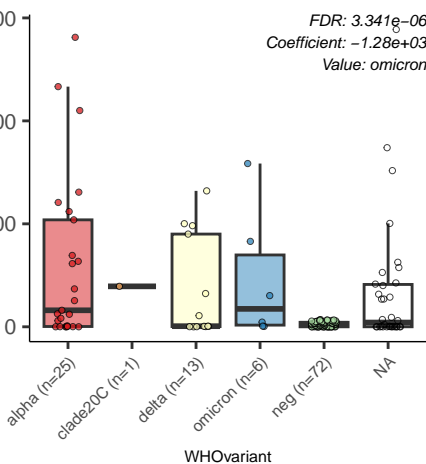

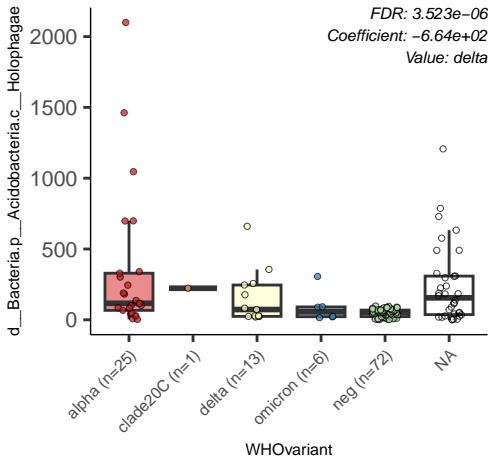

Bacteria.p\_Actinobacteria.c\_Actinomycetia.o\_Corynebacteriale

FDR:  $3.533e-06$   
Coefficient:  $-2.48e+02$   
Value: neg

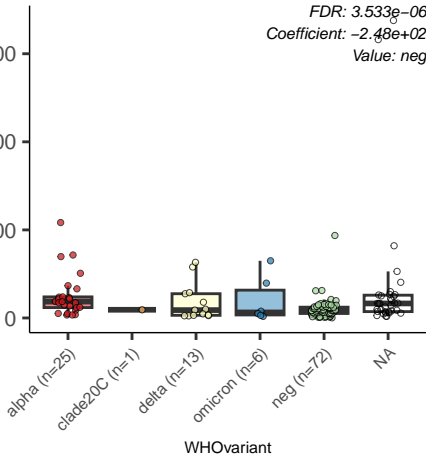

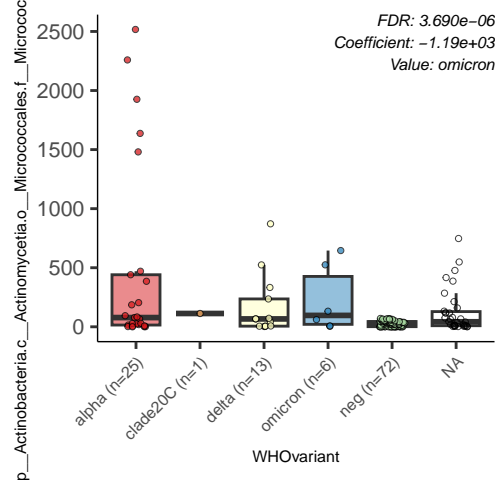

Negativicutes.o\_\_Selenomonadales.f\_\_Selenomonadaceae.g\_\_Se

FDR:  $3.988e-06$   
Coefficient:  $-3.58e+03$   
Value: neg

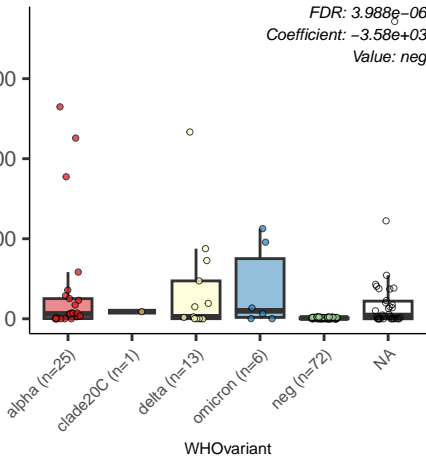



d\_\_Bacteria.p\_\_Armatimonadetes

FDR:  $4.086e-06$   
Coefficient:  $-1.94e+02$   
Value: neg

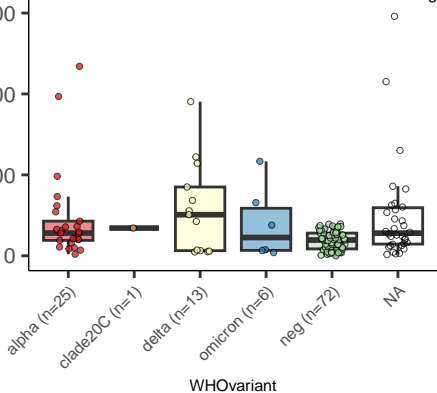

Actinobacteria.p\_Actinobacteria.c\_Actinomycetia.o\_Corynebacteriales.f\_G

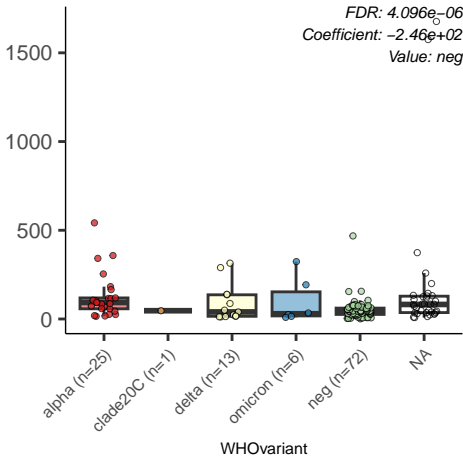



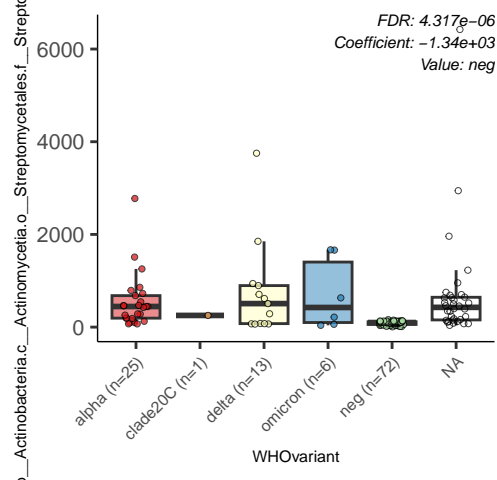

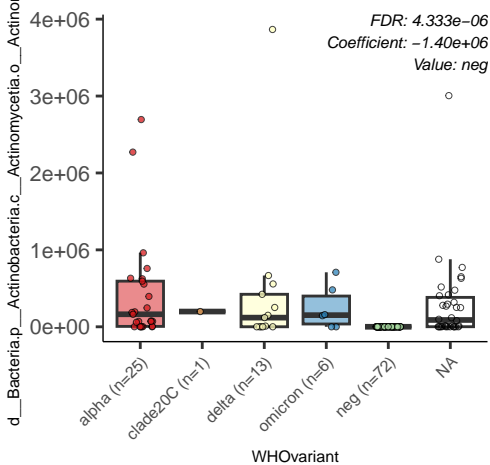

Bacteria.p\_Actinobacteria.c\_Actinomycetia.o\_Actinomycetales.f

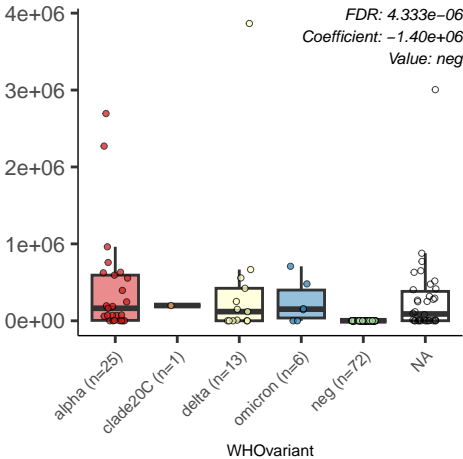

a.c\_Actinomycetia.o\_Actinomycetales.f\_Actinomycetaceae.g\_A

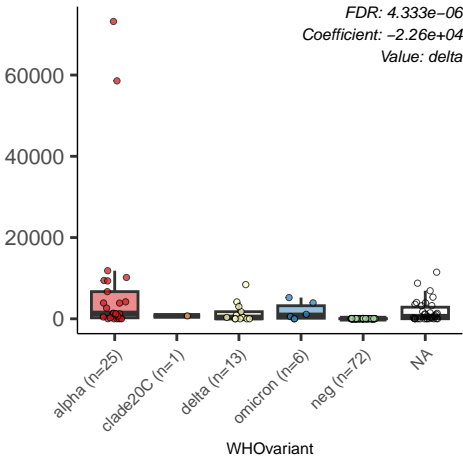

d\_Bacteria.p\_\_Chloroflexi

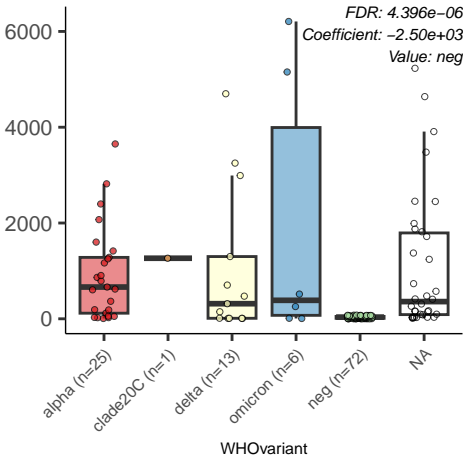



d\_Bacteria.p\_Firmicutes.c\_Clostridia.o\_Halanaero

FDR:  $4.547e-06$   
Coefficient:  $-2.97e+02$   
Value: delta

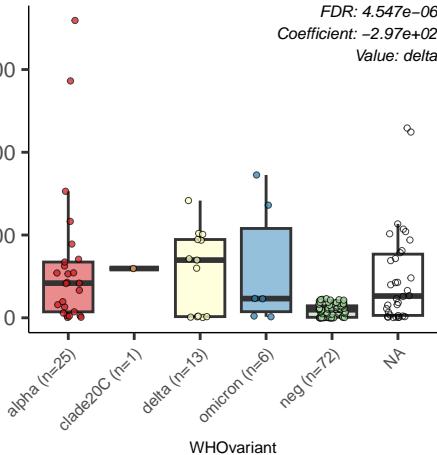

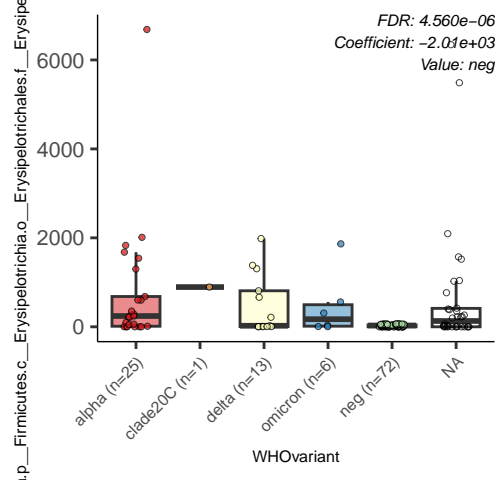

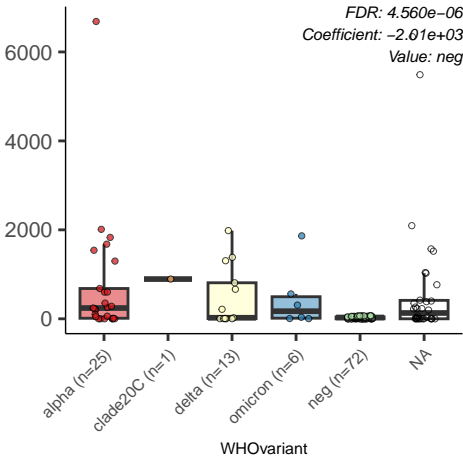

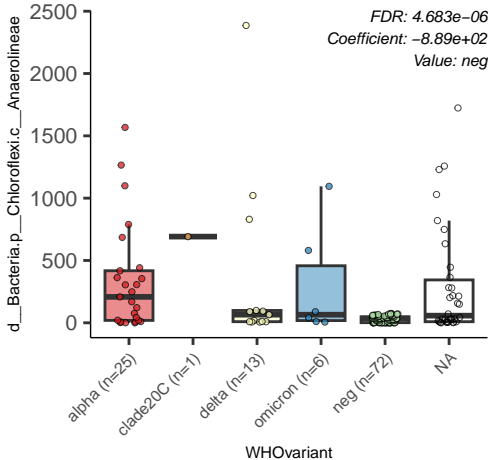

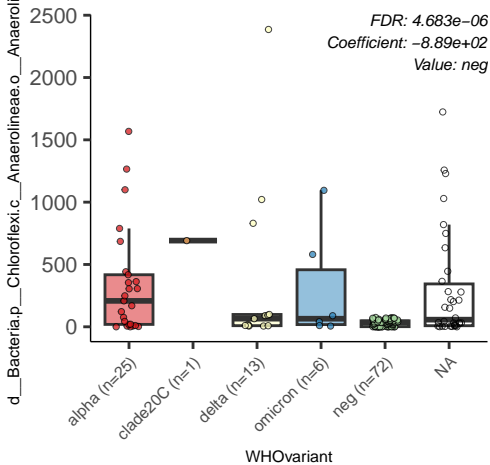

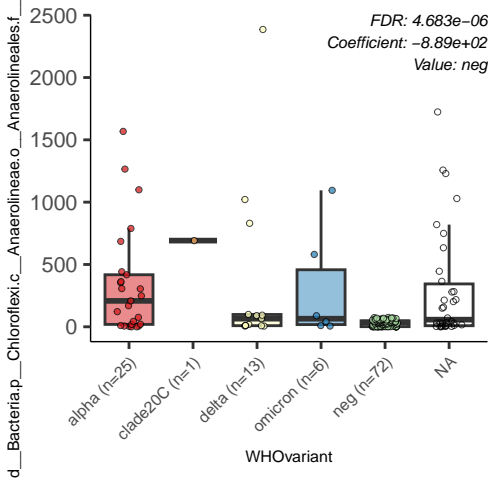

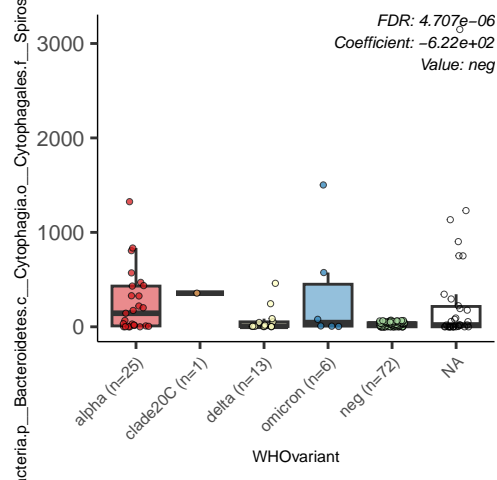

cteroidetes.c\_\_Cytophagia.o\_\_Cytophagales.f\_\_Spirosomaceae.g

FDR:  $4.707e-06$   
Coefficient:  $-6.22e+02$   
Value: neg

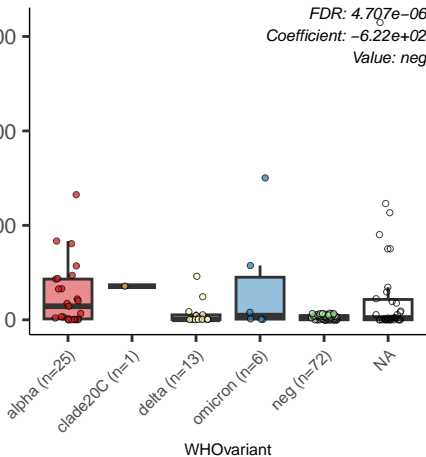



eria.p\_\_Bacteroidetes.c\_\_Flavobacteriia.o\_\_Flavobacteriales.f\_\_We

FDR:  $4.707e-06$   
Coefficient:  $-1.06e+03$   
Value: neg

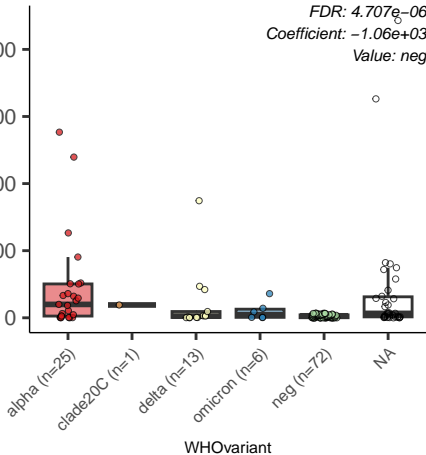

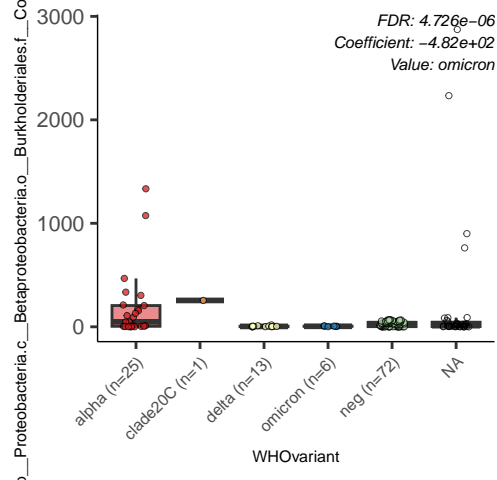

cteria.p\_Actinobacteria.c\_Thermoleophilia.o\_Solirubrobacterales

FDR:  $4.848e-06$   
Coefficient:  $-8.52e+02$   
Value: omicron

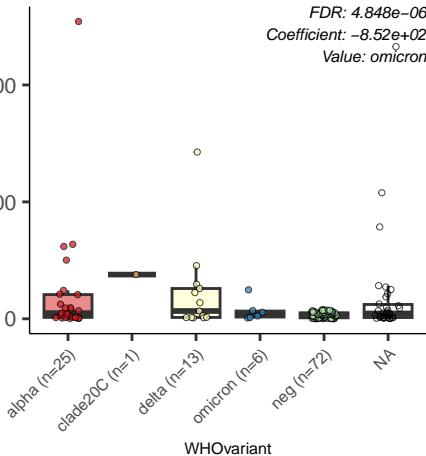

Actinobacteria.c\_\_Thermoleophila.o\_\_Solirubrobacterales.f\_\_Con

FDR:  $4.848e-06$   
Coefficient:  $-8.52e+02$   
Value: omicron

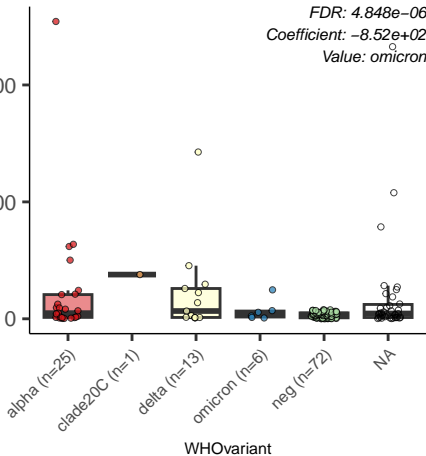

Firmicutes.c\_\_Clostridia.o\_\_Eubacteriales.f\_\_Clostridiaceae.g\_\_Clo

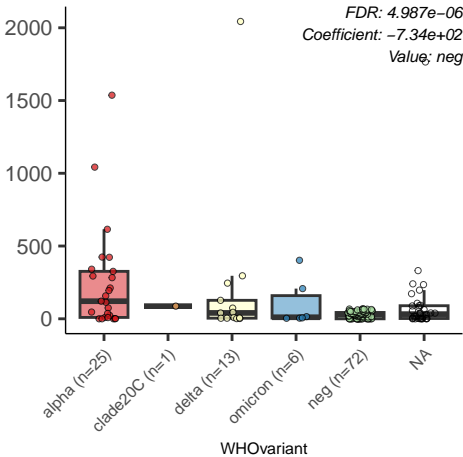

ia.p\_Firmicutes.c\_Bacilli.o\_Bacillales.f\_Bacillaceae.g\_Bacillus

FDR:  $5.178e-06$   
Coefficient:  $1.67e+02$   
Value: delta

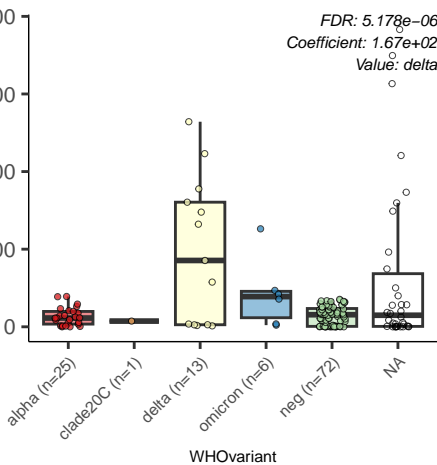

Bacteroidetes.c\_Flavobacteriia.o\_Flavobacteriales.f\_Flavobac

FDR:  $5.385e-06$   
Coefficient:  $-9.01e+02$   
Value: neg

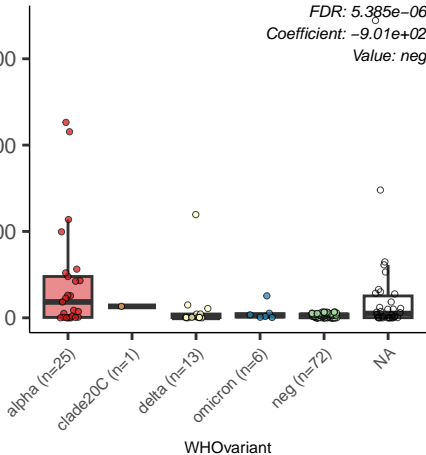

c\_Flavobacteriia.o\_Flavobacteriales.f\_Flavobacteriaceae.g\_Am

FDR:  $5.385e-06$   
Coefficient:  $-9.01e+02$   
Value: neg

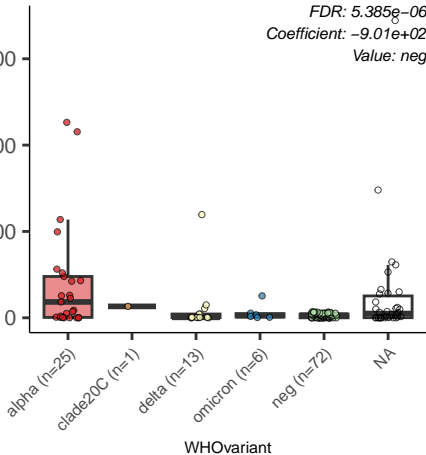



d\_\_Bacteria.p\_\_Verrucomicrobia

FDR: 5.422e-06

Coefficient: -3.91e+03

Value: neg

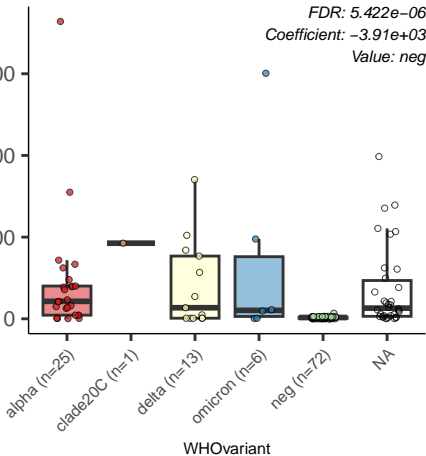

bacteria.c\_\_Actinomycetia.o\_\_Actinomycetales.f\_\_Actinomycetaceae

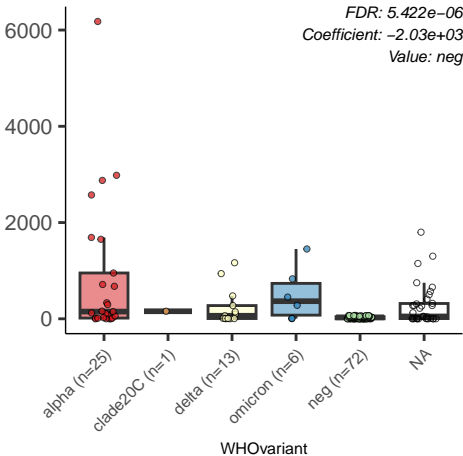

Firmicutes.c\_\_Clostridia.o\_\_Eubacteriales.f\_\_Clostridiaceae.g\_\_Cl

FDR: 5.719e-06  
Coefficient: -1.08e+03  
Value: omicron

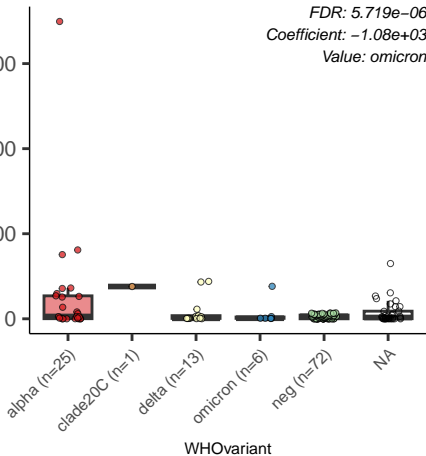

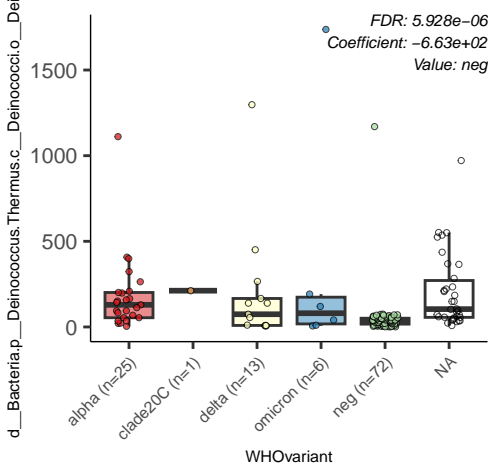

Bacteria.p\_\_Deinococcus.Thermus.c\_\_Deinococci.o\_\_Deinococcaceae

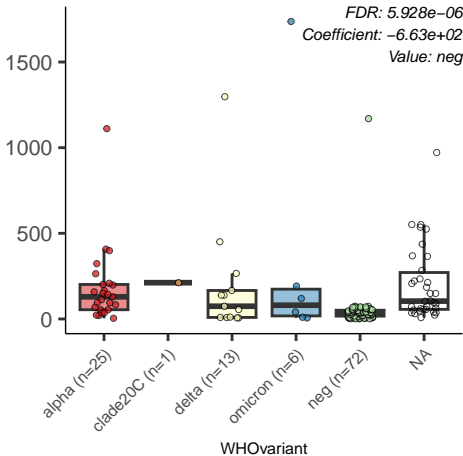

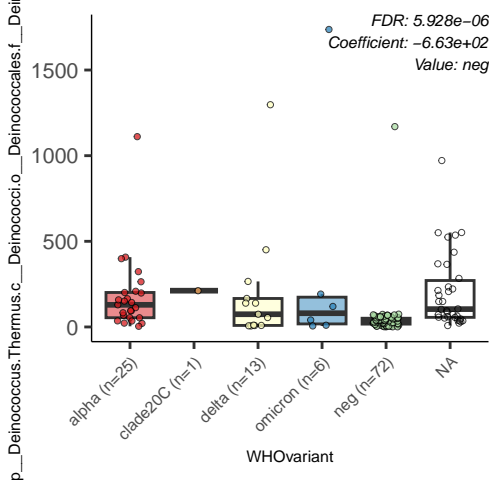

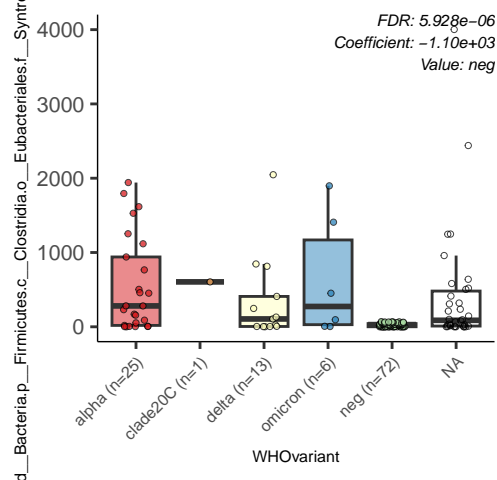

ria.c\_\_Actinomycetia.o\_\_Propionibacteriales.f\_\_Propionibacteriaceae

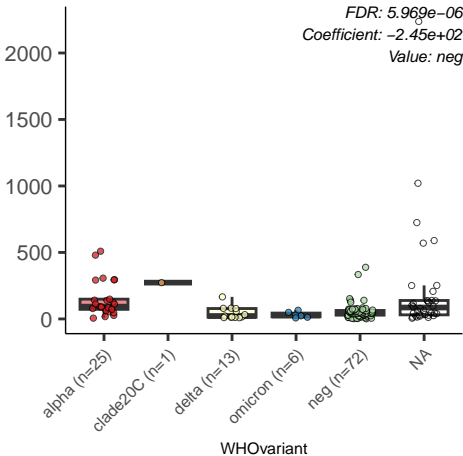



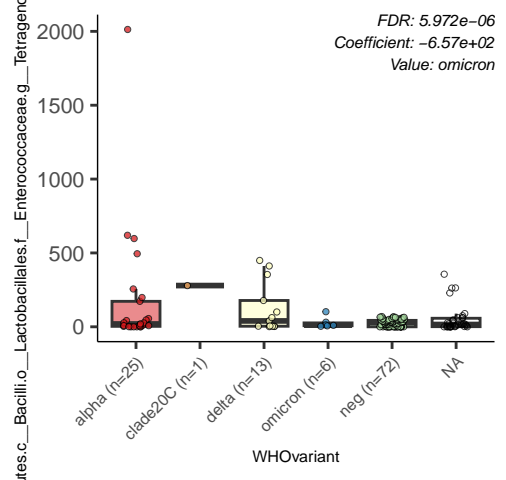

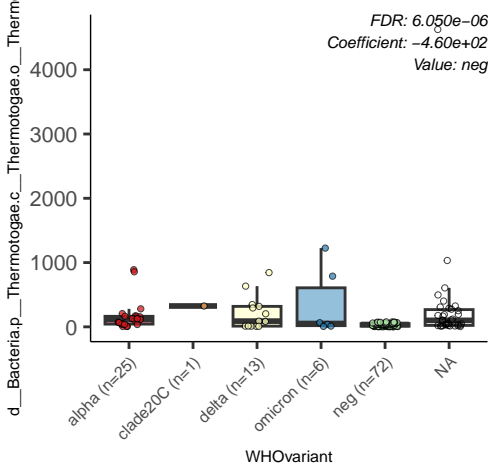

cteria.p\_\_Firmicutes.c\_\_Clostridia.o\_\_Eubacteriales.f\_\_Lachnospira

FDR:  $6.130 \times 10^{-6}$   
Coefficient:  $-1.27 \times 10^3$   
Value: delta

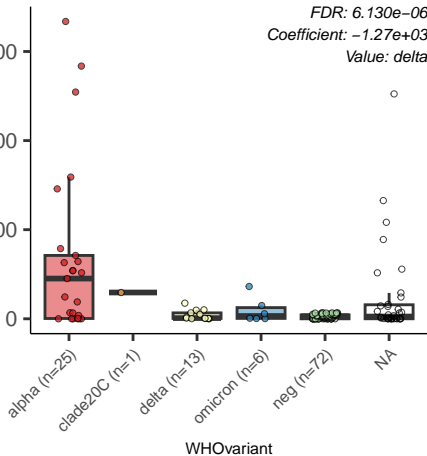

s.c.\_Clostridia.o\_\_Eubacteriales.f\_\_Lachnospiraceae.g\_\_Faecalica

FDR: 6.130e-06  
Coefficient: -1.27e+03  
Value: delta

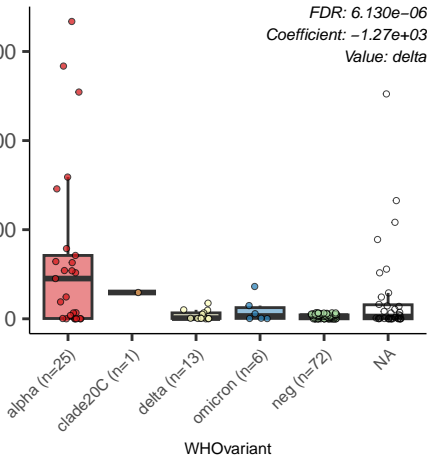

es.c\_\_Negativicutes.o\_\_Selenomonadales.f\_\_Selenomonadaceae.g

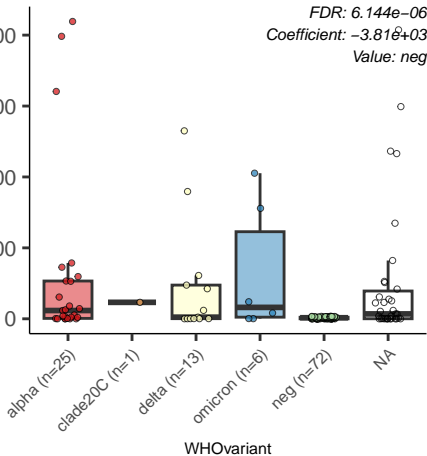

d\_Bacteria.p\_Firmicutes.c\_Bacilli.o\_Lactobacillales.f\_Ent

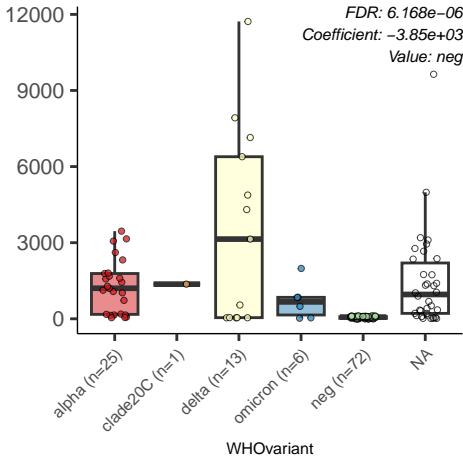

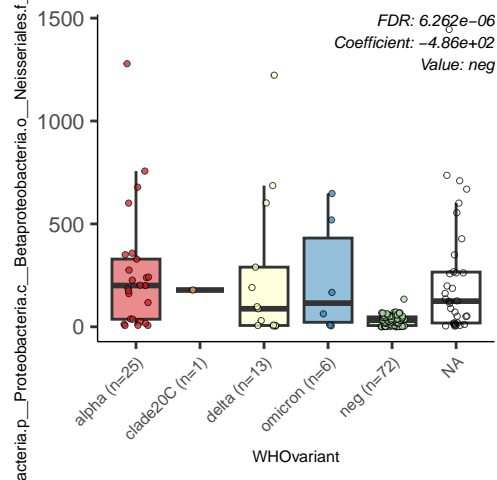

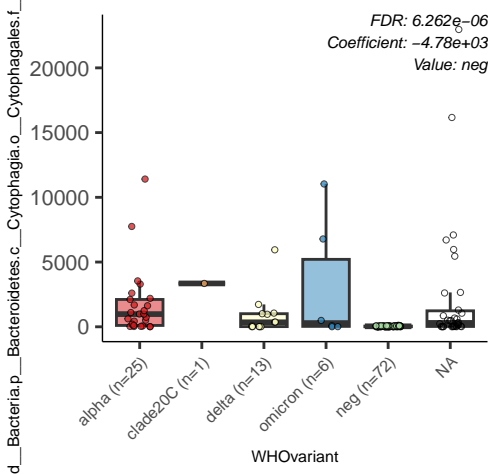



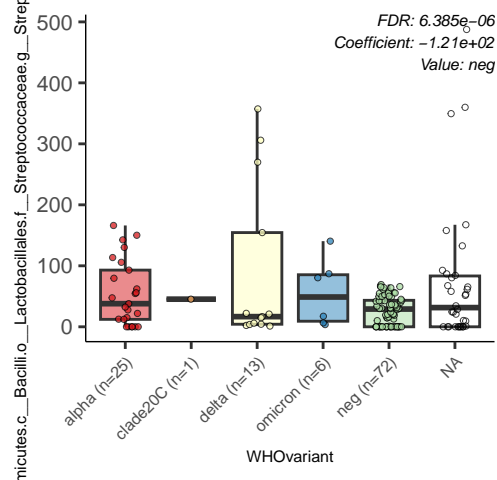

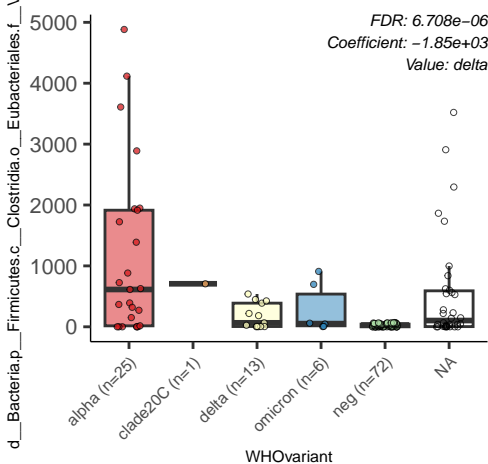

Firmicutes.c\_\_Clostridia.o\_\_Eubacteriales.f\_\_Lachnospiraceae.g\_\_B

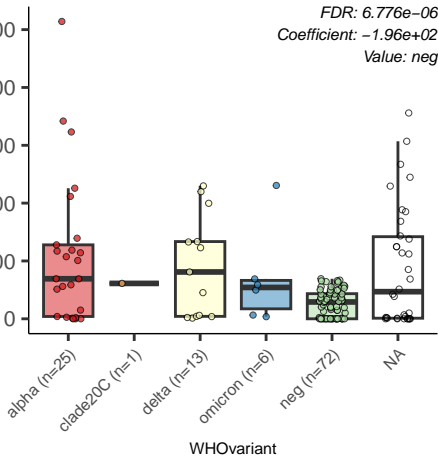

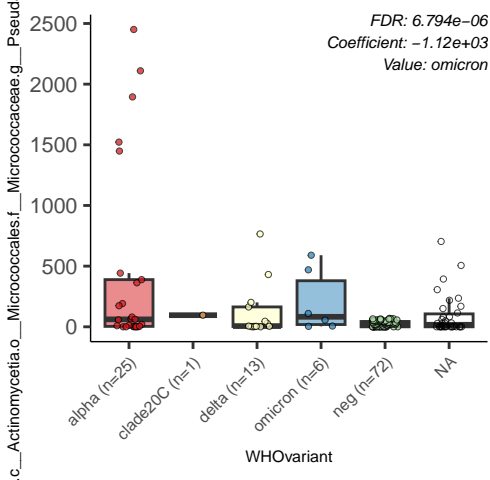

es.c\_\_Tissierellia.o\_\_Tissierellales.f\_\_Peptoniphilaceae.g\_\_Anaeroc

*FDR: 7.009e-06*  
*Coefficient: -1.38e+03*  
*Value: delta*

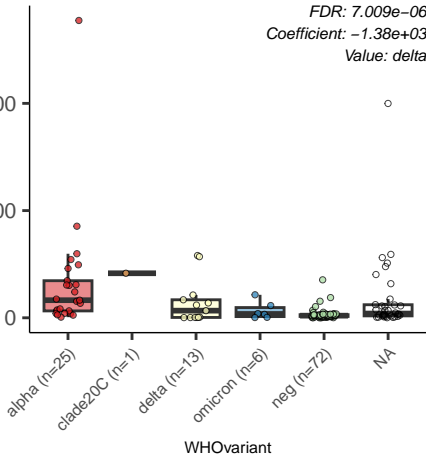

acteria.p\_\_Firmicutes.c\_\_Bacilli.o\_\_Bacillales.f\_\_Bacillaceae.g\_\_Bac

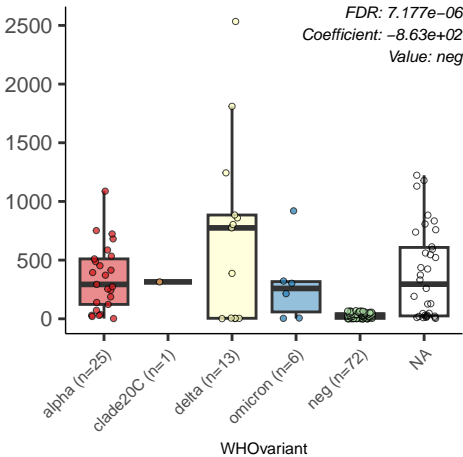

d\_Bacteria.p\_Firmicutes.c\_Bacilli.o\_Bacillales.f\_Bacillaceae

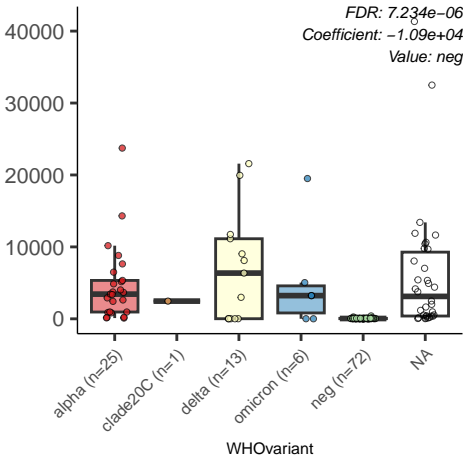

Bacteria.p\_\_Proteobacteria.c\_\_Betaproteobacteria.o\_\_Burkholderia

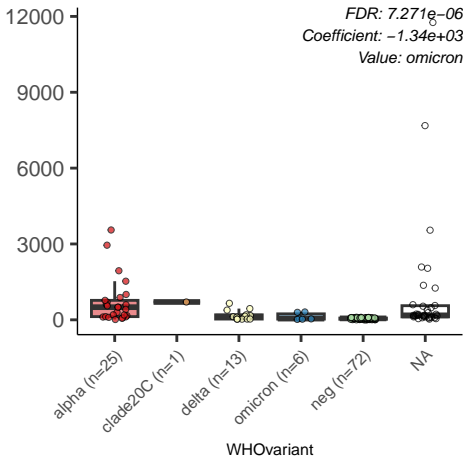



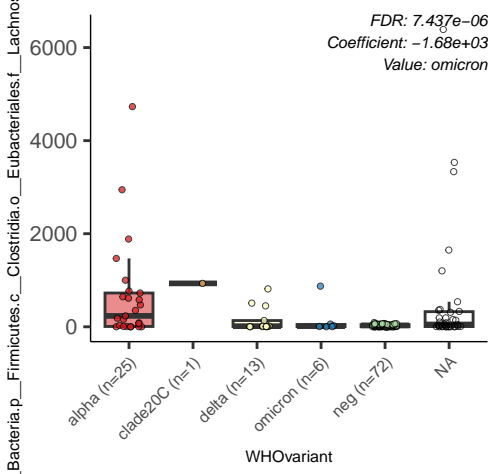

Firmicutes.c\_\_Clostridia.o\_\_Eubacteriales.f\_\_Lachnospiraceae.g

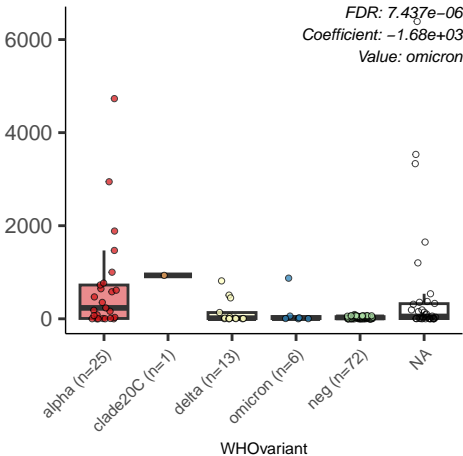

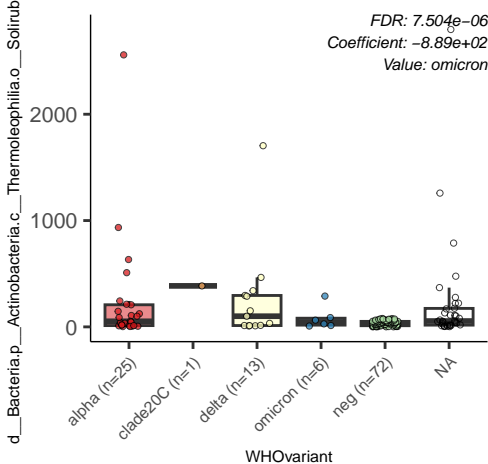

bacteria.p\_\_Firmicutes.c\_\_Clostridia.o\_\_Eubacteriales.f\_\_Oscillospir

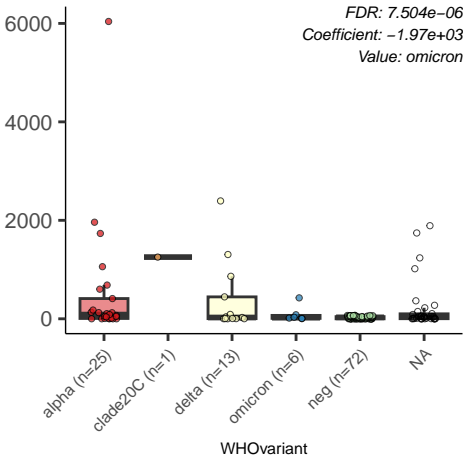

micutes.c\_\_Clostridia.o\_\_Eubacteriales.f\_\_Oscillospiraceae.g\_\_Fas

FDR:  $7.504e-06$   
Coefficient:  $-1.97e+03$   
Value: omicron

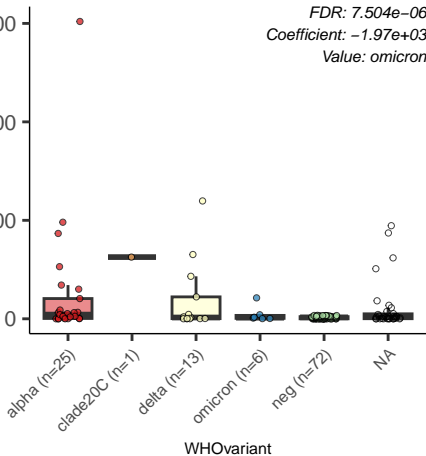

FDR:  $7.504e-06$   
Coefficient:  $-5.47e+02$   
Value: delta

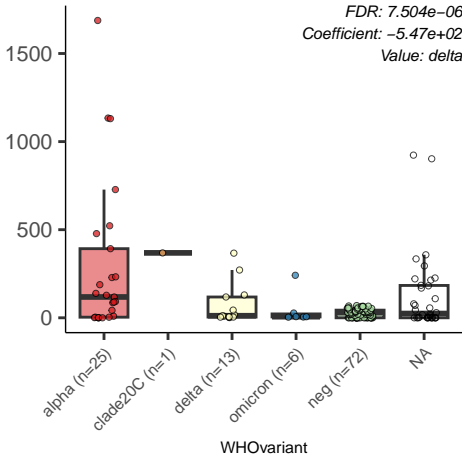

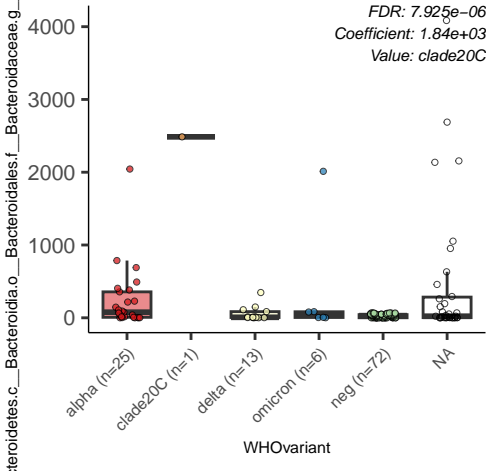

a.c\_Actinomycetia.o\_Actinomycetales.f\_Actinomycetaceae.g\_A

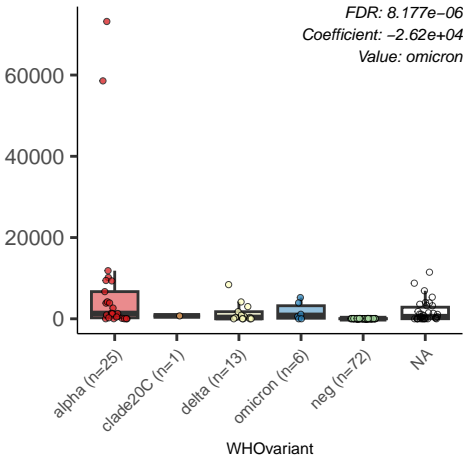



bacteria.p\_\_Firmicutes.c\_\_Clostridia.o\_\_Eubacteriales.f\_\_Eubacteri

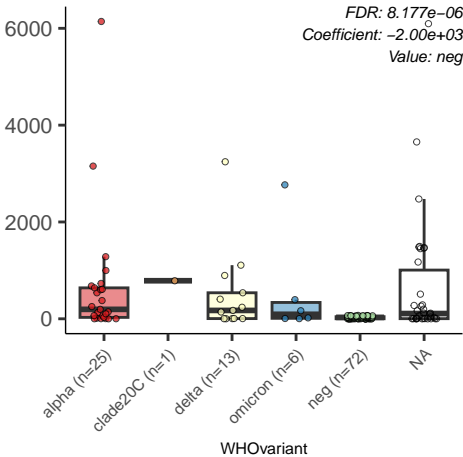

irmicutes.c\_\_Bacilli.o\_\_Lactobacillales.f\_\_Streptococcaceae.g\_\_Lac

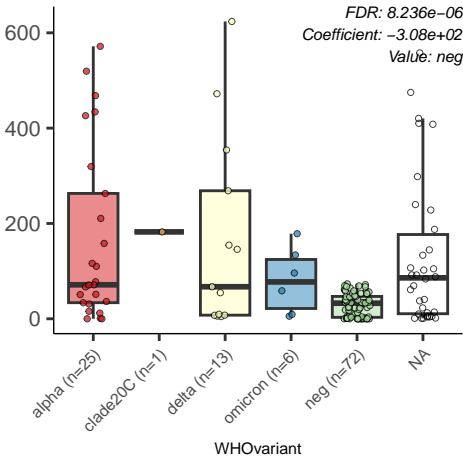



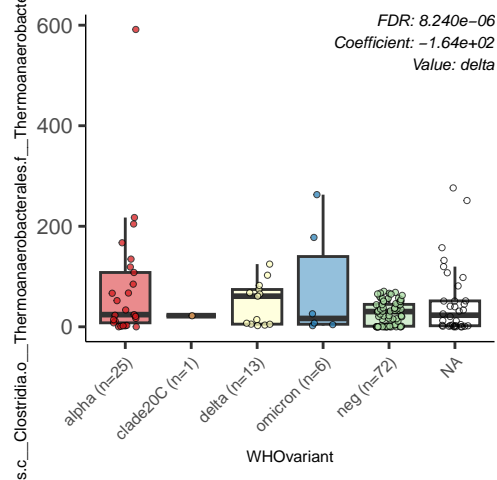

ia.o\_\_Thermoanaerobacterales.f\_\_Thermoanaerobacterales.Family

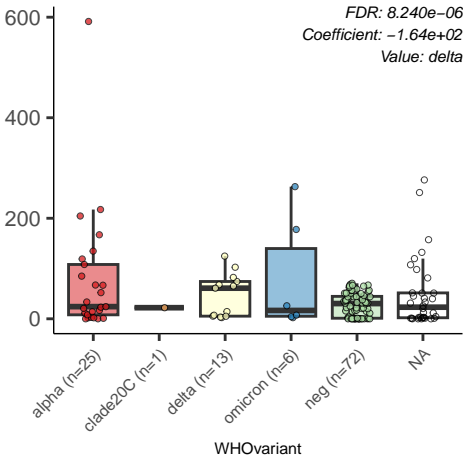

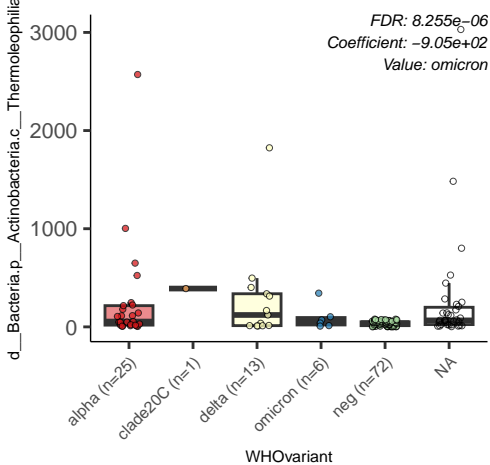

eria.p\_\_Verrucomicrobia.c\_\_Verrucomicrobiae.o\_\_Verrucomicrobiale

*FDR: 8.483e-06*  
*Coefficient: -9.62e+02*  
*Value: omicron*

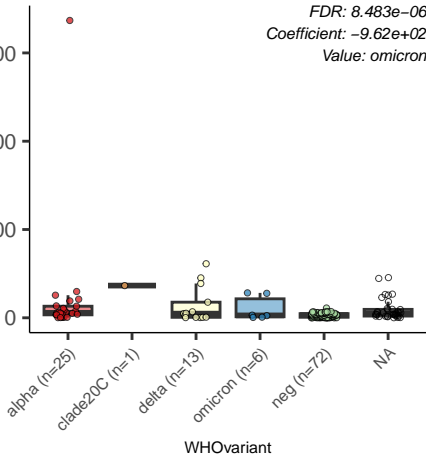

ria.p\_\_Proteobacteria.c\_\_Alphaproteobacteria.o\_\_Hyphomicrobiales

FDR:  $8.718e-06$   
Coefficient:  $-4.67e+02$   
Value: omicron

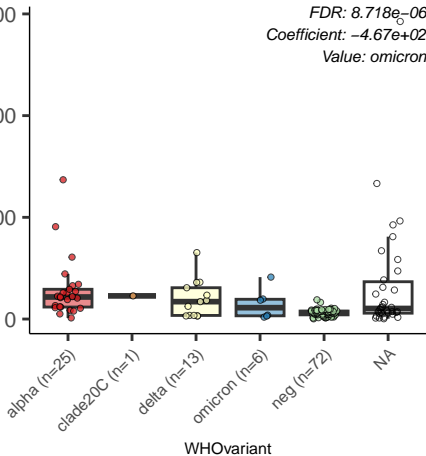



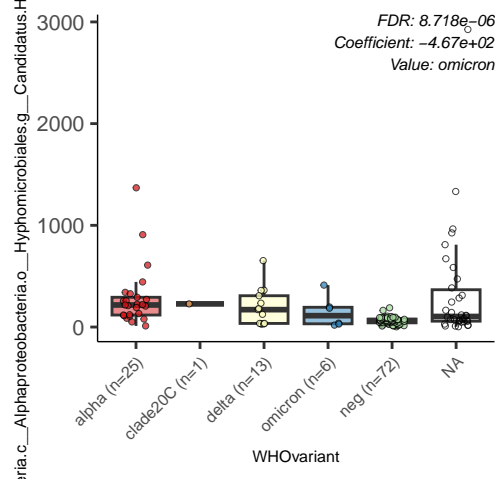

terial.p\_\_Bacteroidetes.c\_\_Bacteroidia.o\_\_Marinilabiales.f\_\_Marinil

*FDR: 8.966e-06*  
*Coefficient: -2.21e+02*  
*Value: neg*

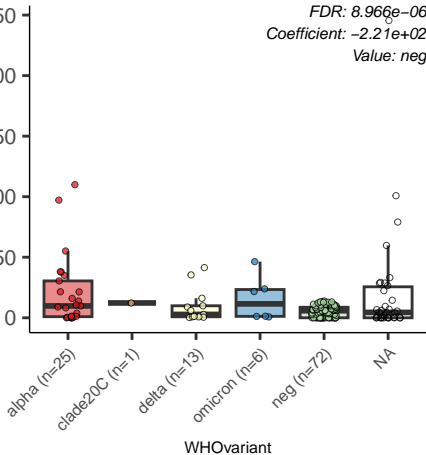

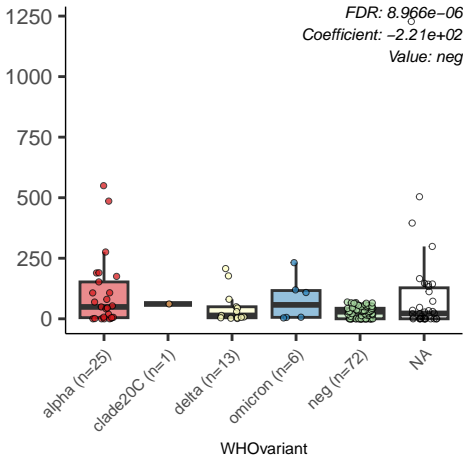

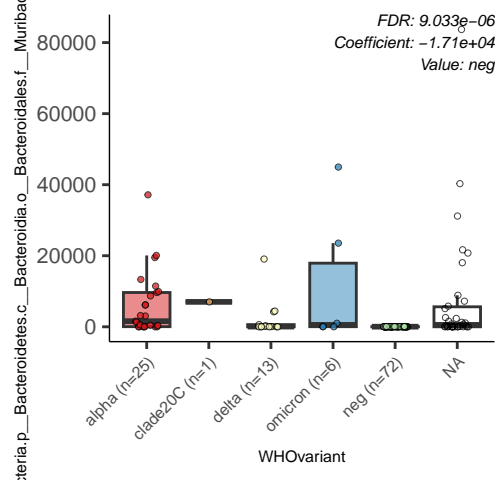

d\_\_Bacteria.p\_\_Cyanobacteria.o\_\_Pseudanabaena

FDR:  $9.100e-06$   
Coefficient:  $7.46e+03$   
Value: clade20C

10000

5000

alpha (n=25)

clade20C (n=1)

delta (n=13)

omicron (n=6)

neg (n=72)

NA

WHOvariant

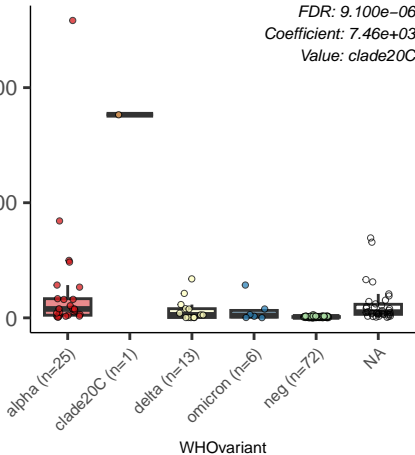

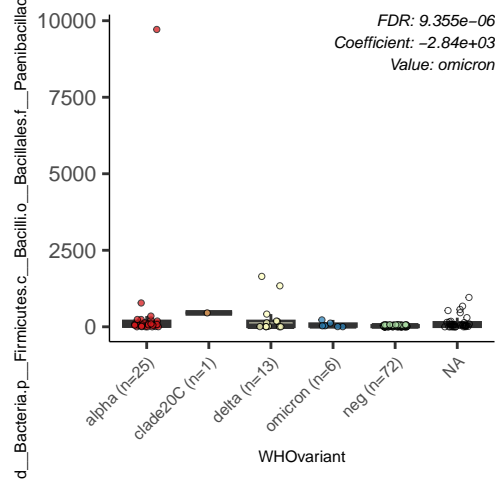

Flavobacteriia.o\_\_Flavobacteriales.f\_\_Weeksellaceae.g\_\_Elizabeth

FDR:  $9.369e-06$   
Coefficient:  $-3.52e+02$   
Value: neg

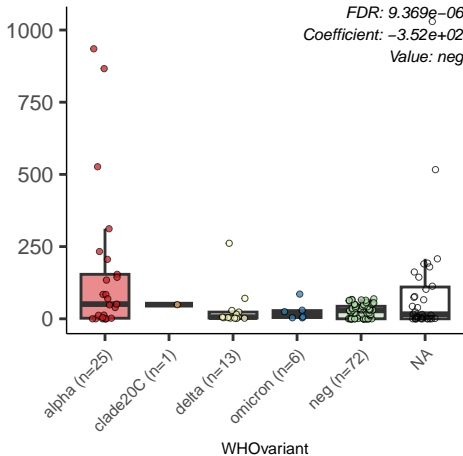

d\_\_Bacteria.p\_\_Cyanobacteria.o\_\_Pseudanabaenales.f\_\_Lept

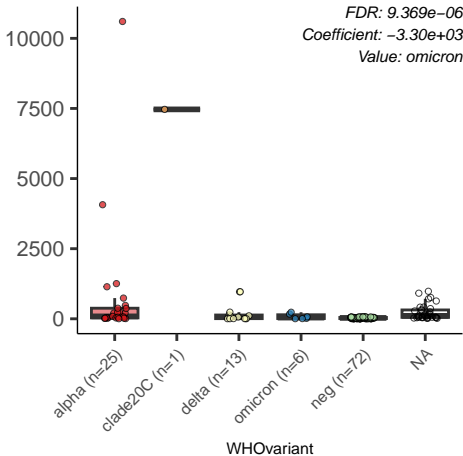



monadia.o\_\_Candidatus.Nanosynbacterales.f\_\_Candidatus.Nanosyn

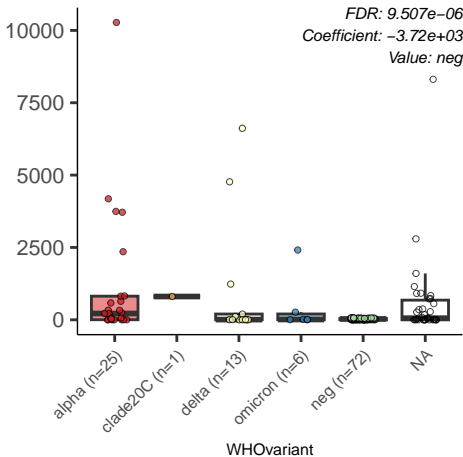

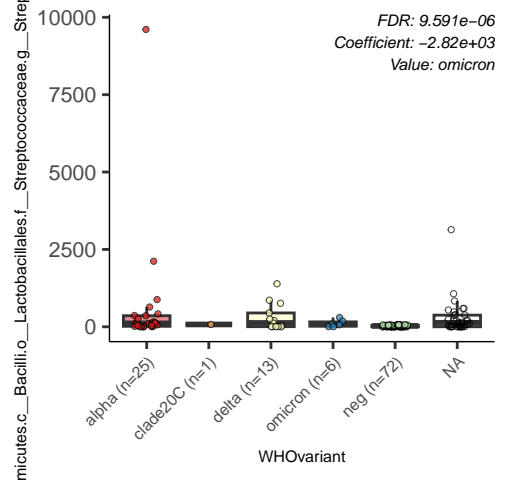

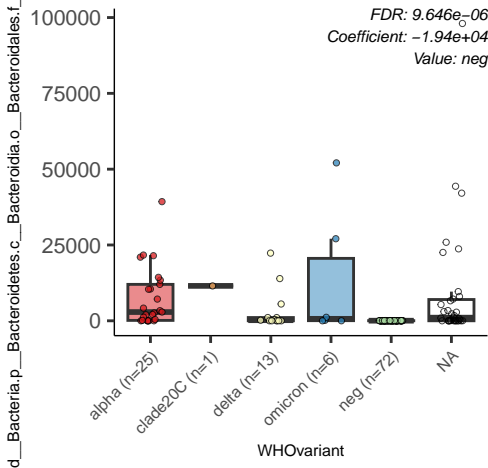

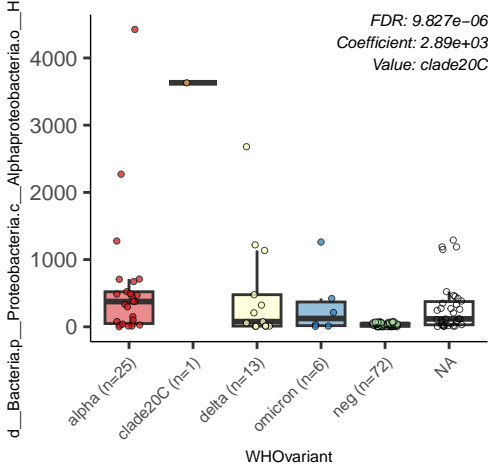

Bacteria.p\_\_Proteobacteria.c\_\_Alphaproteobacteria.o\_\_Holosporal

FDR:  $9.827e-06$   
Coefficient:  $2.88e+03$   
Value: clade20C

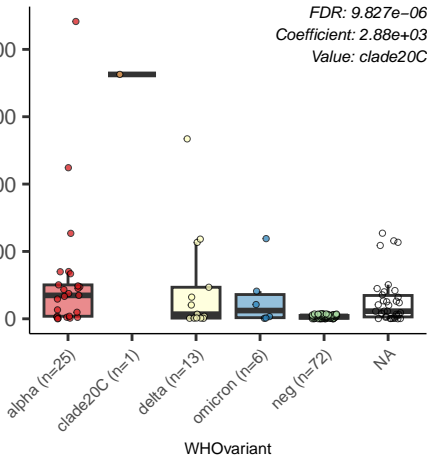

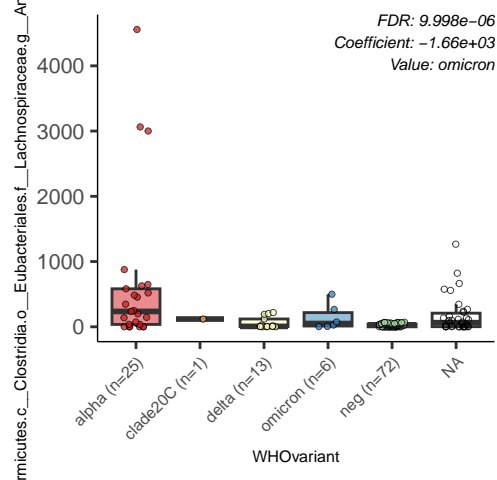

a.c.\_Thermoleophilia.o\_\_Solirubrobacterales.f\_\_Conexibacteraceae

FDR: 1.037e-05  
Coefficient: -7.75e+02  
Value: omicron

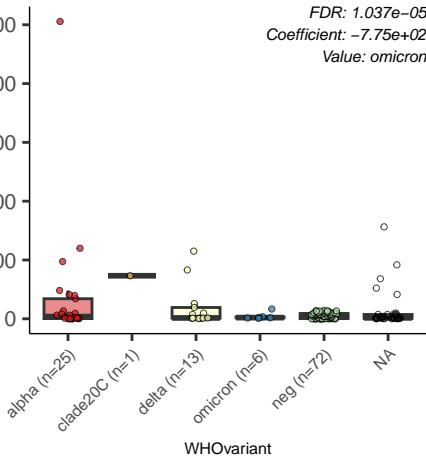

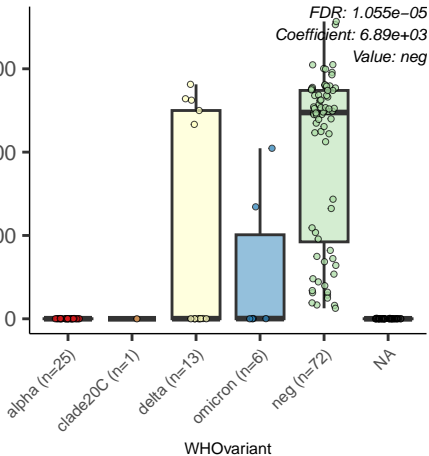



rmicutes.c\_\_Clostridia.o\_\_Eubacteriales.f\_\_Clostridiaceae.g\_\_Clost

FDR:  $1.055e-05$   
Coefficient:  $-2.50e+03$   
Value: neg

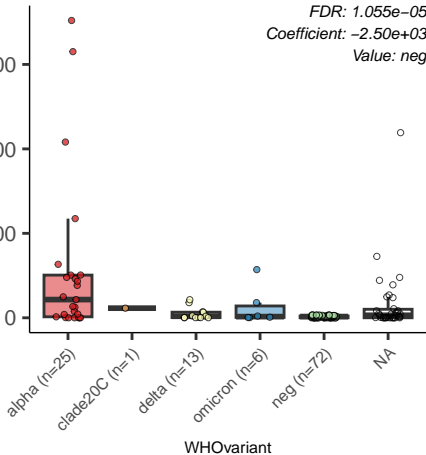

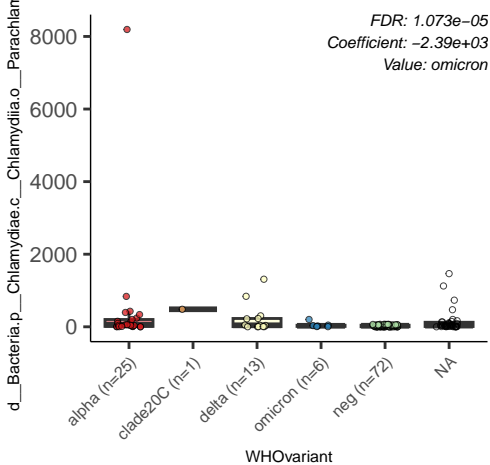

3acteria.p\_\_Cyanobacteria.o\_\_Pseudanabaenales.f\_\_Leptolyngbya

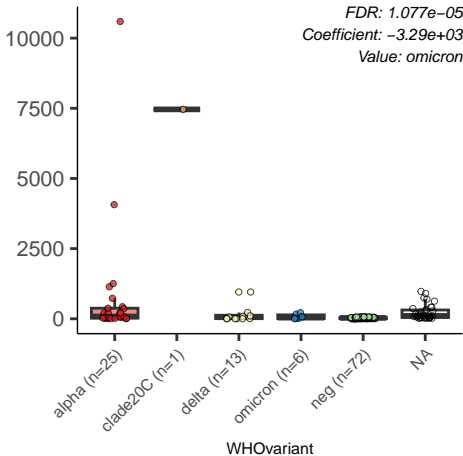

d\_Bacteria.p\_Firmicutes.c\_Bacilli.o\_Bacillales.f\_Bacillaceae

FDR:  $1.079 \times 10^{-5}$   
Coefficient:  $-5.19 \times 10^2$   
Value: neg

2000  
1000  
0

alpha (n=25)

clade20C (n=1)

delta (n=13)

omicron (n=6)

neg (n=72)

NA

WHOvariant

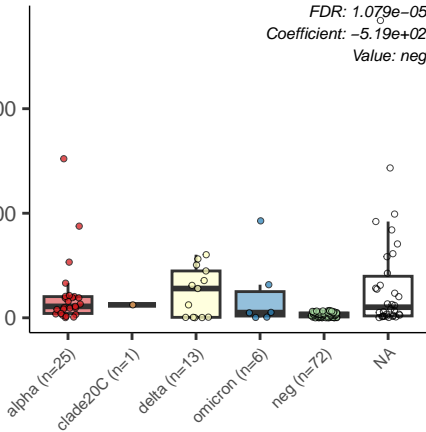

d\_\_Bacteria.p\_\_Tenericutes.c\_\_Mollicutes.o\_\_Acholeplas

FDR:  $1.118e-05$   
Coefficient:  $-8.81e+02$   
Value: omicron

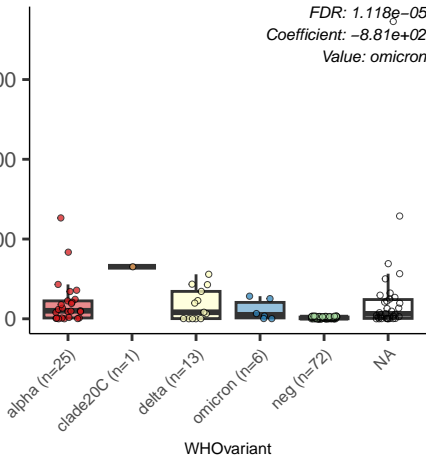

FDR:  $1.118 \times 10^{-5}$   
Coefficient:  $-8.81 \times 10^2$   
Value: omicron

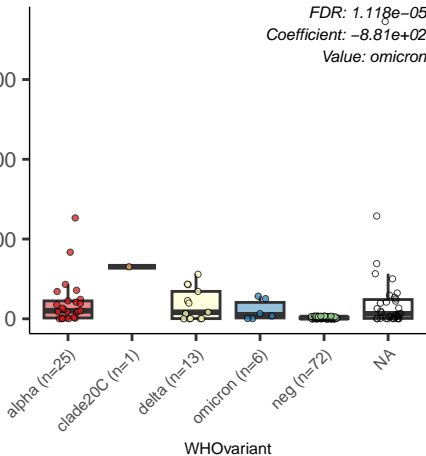

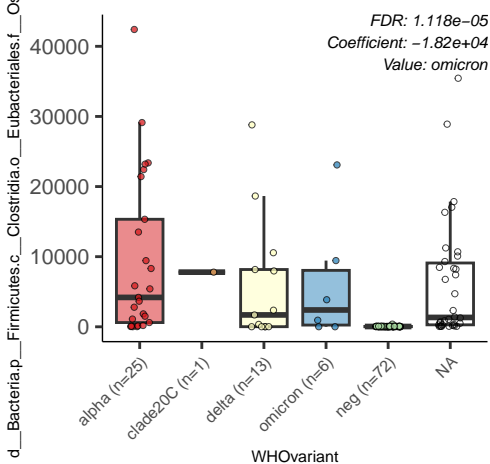

c\_\_Clostridia.o\_\_Eubacteriales.f\_\_Eubacteriales.Family.XIII...Incerta

FDR:  $1.133e-05$   
Coefficient:  $-5.40e+02$   
Value: neg

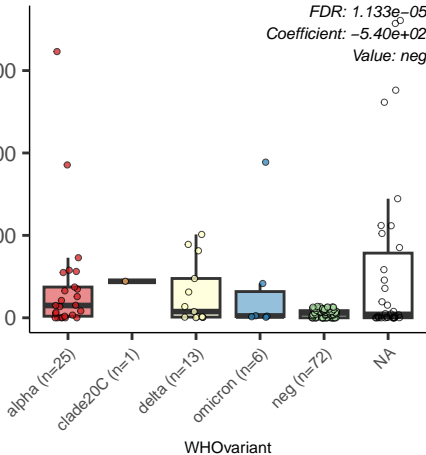



o\_\_Proteobacteria.c\_\_Betaproteobacteria.o\_\_Burkholderiales.f\_\_Bu

FDR:  $1.135e-05$   
Coefficient:  $-4.25e+02$   
Value: neg

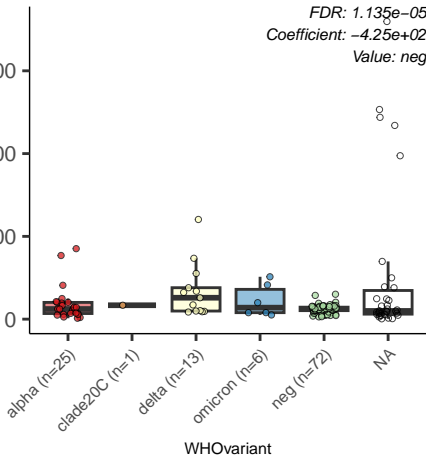

d\_Bacteria.p\_\_Proteobacteria.c\_\_Gammaproteobacteria.o\_\_

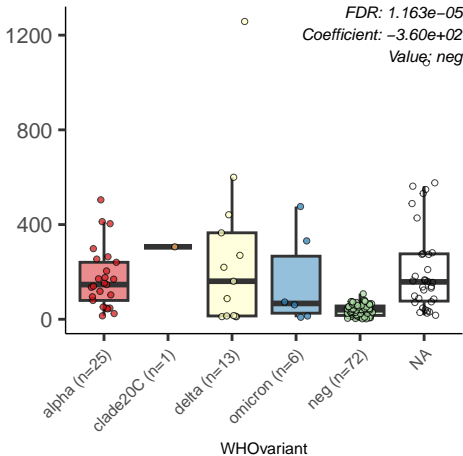

Bacteria.p\_Firmicutes.c\_Clostridia.o\_Eubacteriales.f\_\_Vallitale

FDR:  $1.195e-05$   
Coefficient:  $-5.96e+02$   
Value: delta

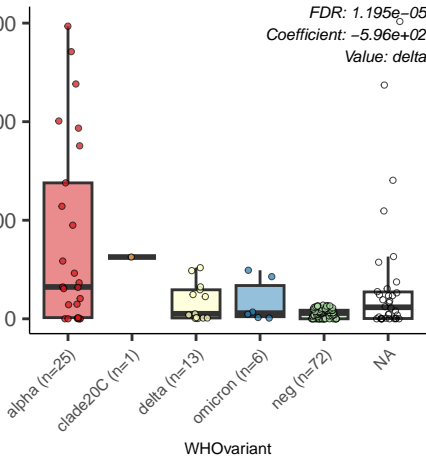

Firmicutes.c\_\_Clostridia.o\_\_Eubacteriales.f\_\_Vallitaleaceae.g\_\_Pet

*FDR: 1.195e-05*  
*Coefficient: -5.96e+02*  
*Value: delta*

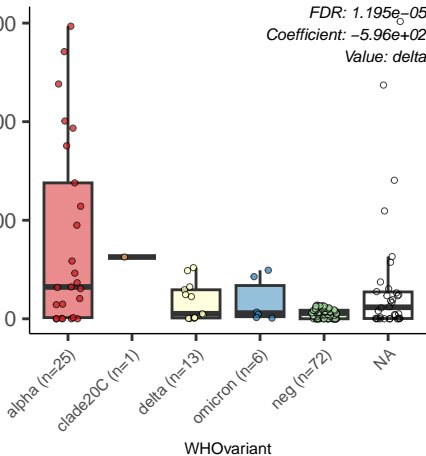

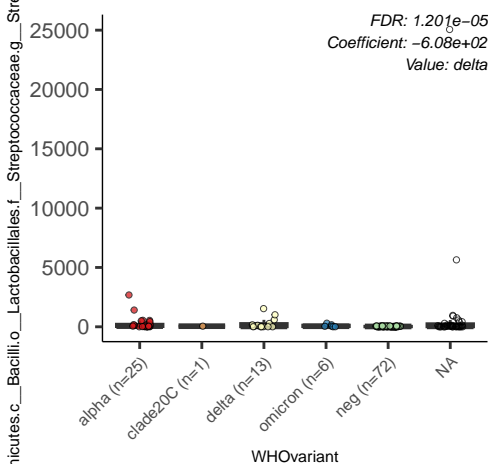

Flavobacteriia.o\_Flavobacteriales.f\_Weeksellaceae.g\_Chryse

FDR:  $1.221e-05$   
Coefficient:  $-2.87e+02$   
Value: omicron

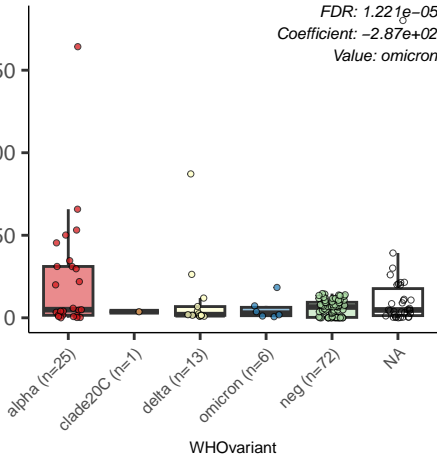

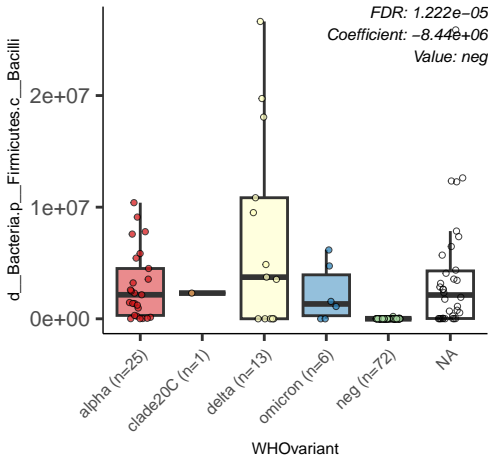

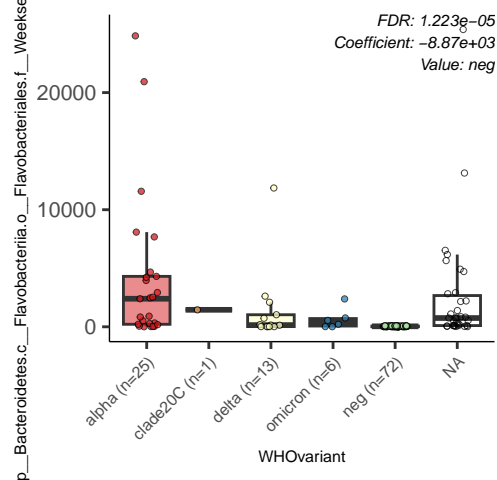



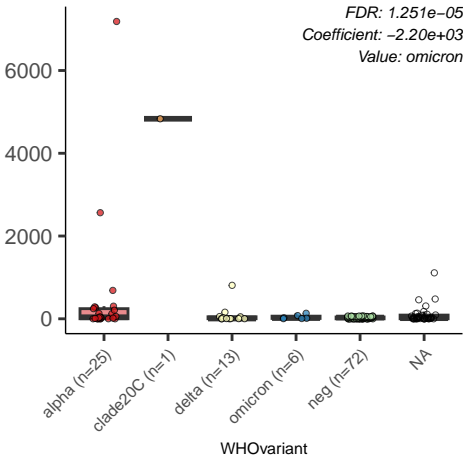

bacteria.p\_\_Firmicutes.c\_\_Tissierellia.o\_\_Tissierellales.f\_\_Peptoniph

*FDR: 1.251e-05*  
*Coefficient: -1.56e+03*  
*Value: neg*

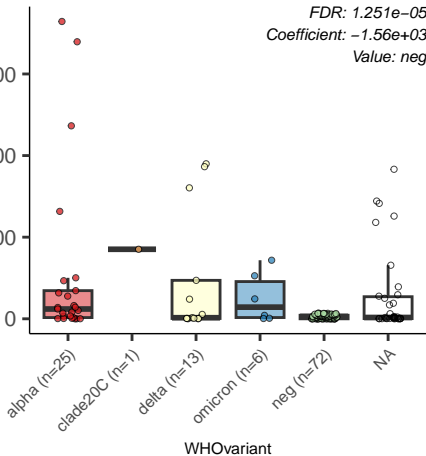

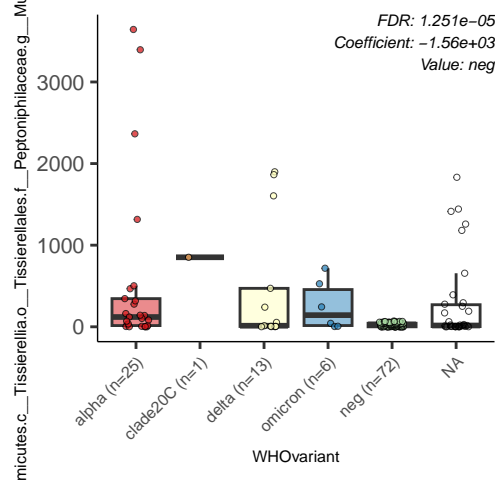

d\_Bacteria.p\_Firmicutes.c\_Clostridia.o\_Eubacteriales.f\_La

FDR:  $1.254e-05$   
Coefficient:  $-2.39e+05$   
Value: delta

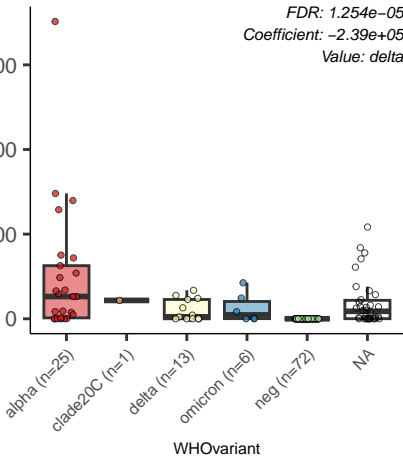

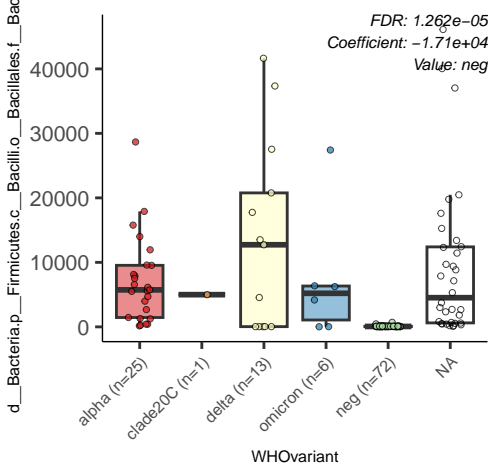

micutes.c\_\_Bacilli.o\_\_Lactobacillales.f\_\_Streptococcaceae.g\_\_Stre

*FDR: 1.266e-05*  
*Coefficient: -3.38e+04*  
*Value: neg*

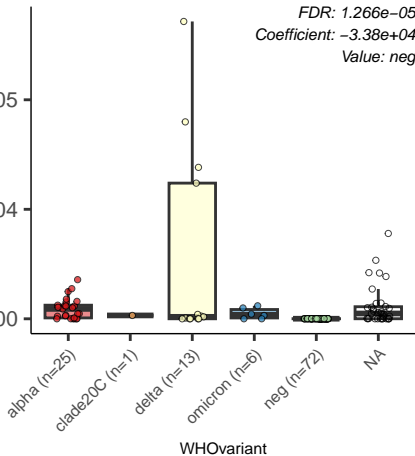

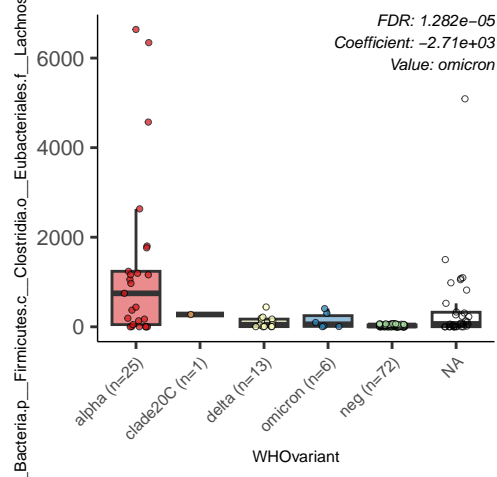

Firmicutes.c\_\_Clostridia.o\_\_Eubacteriales.f\_\_Lachnospiraceae.g

FDR: 1.282e-05  
Coefficient: -2.71e+03  
Value: omicron

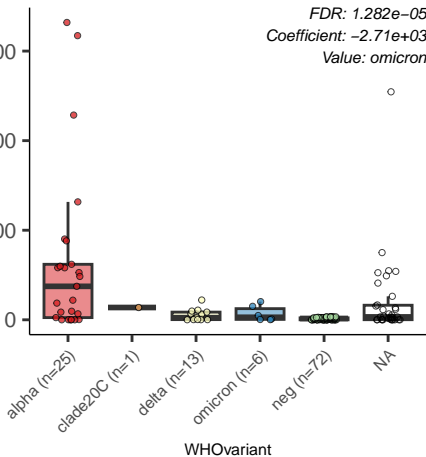



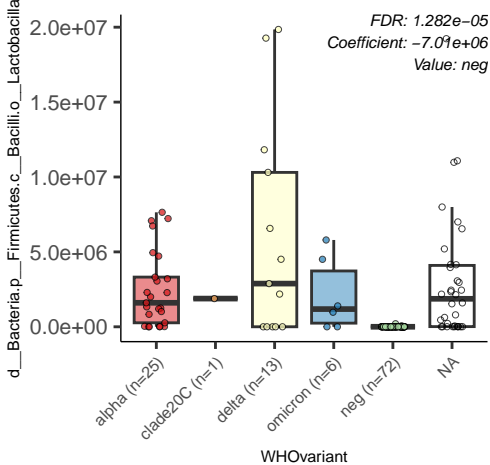

bacteria.p\_\_Firmicutes.c\_\_Clostridia.o\_\_Eubacteriales.f\_\_Lachnospir

*FDR: 1.308e-05*  
*Coefficient: -1.12e+03*  
*Value: neg*

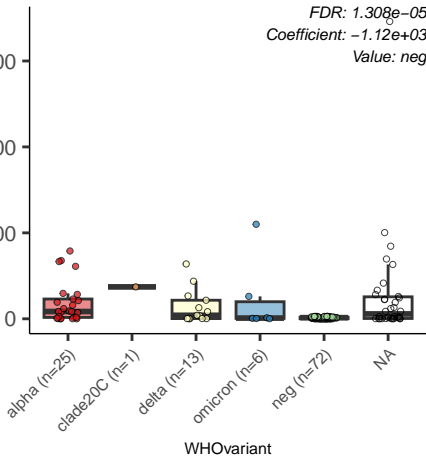

l\_Bacteria.p\_\_Bacteroidetes.c\_\_Cytophagia.o\_\_Cytophagales.f\_\_N

FDR:  $1.314e-05$   
Coefficient:  $-2.63e+02$   
Value: neg

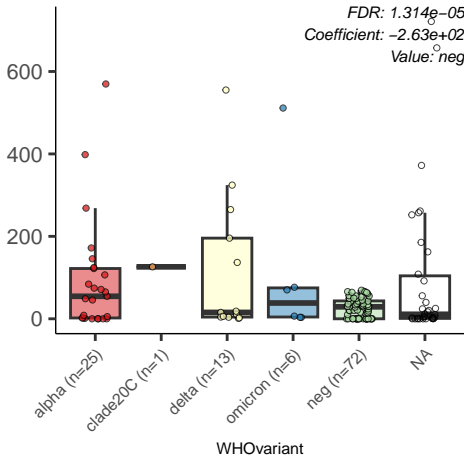

ia.p\_\_Bacteroidetes.c\_\_Cytophagia.o\_\_Cytophagales.f\_\_Mangrovi

FDR:  $1.314e-05$   
Coefficient:  $-2.63e+02$   
Value: neg

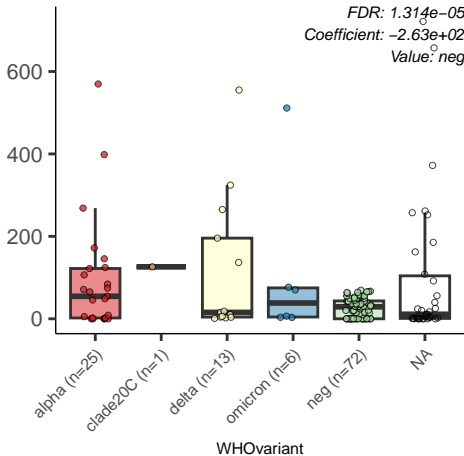

bidetes.c\_\_Cytophagia.o\_\_Cytophagales.f\_\_Mangrovivirgaceae.g

FDR:  $1.314e-05$   
Coefficient:  $-2.63e+02$   
Value: neg

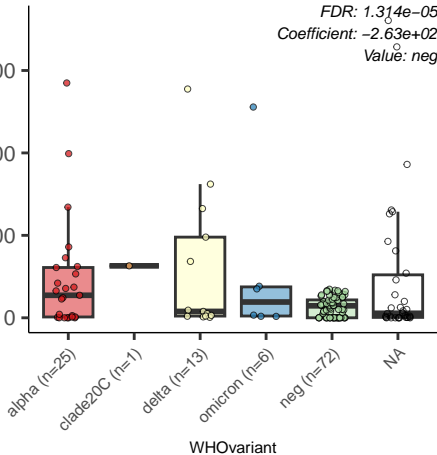

d\_\_Bacteria.p\_\_Actinobacteria.c\_\_Actinomycetia.o\_\_Strepto

FDR:  $1.397e-05$   
Coefficient:  $-1.53e+03$   
Value: neg

10000

5000

0

alpha (n=25)

clade20C (n=1)

delta (n=13)

omicron (n=6)

neg (n=72)

NA

WHOvariant

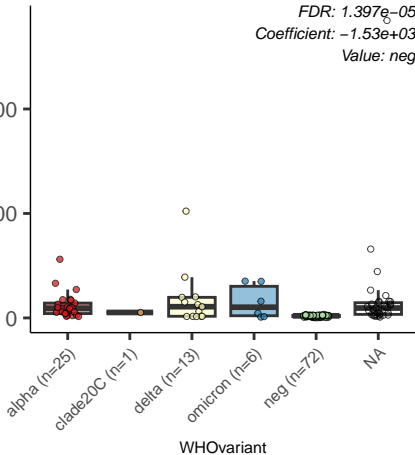

Bacteria.p\_Actinobacteria.c\_Actinomycetia.o\_Streptomycetales.f

FDR:  $1.397e-05$   
Coefficient:  $-1.53e+03$   
Value: neg

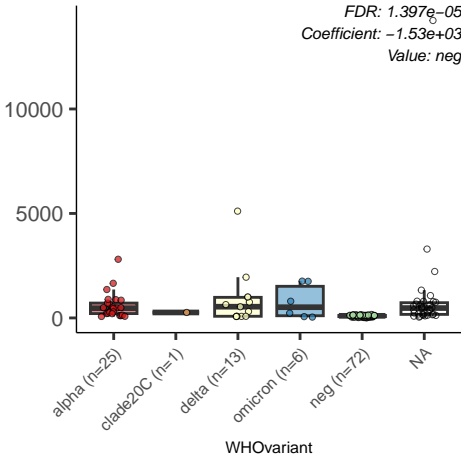

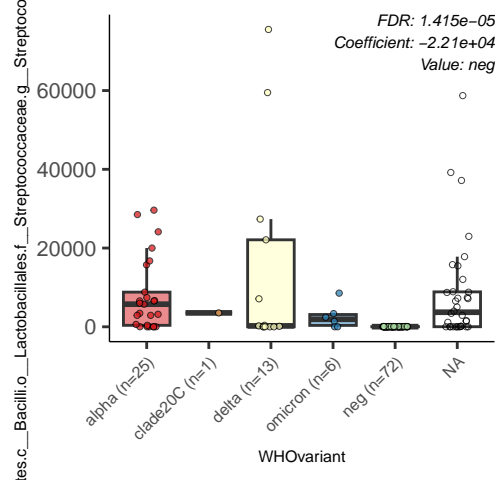



Bacteria.p\_\_Firmicutes.c\_\_Clostridia.o\_\_Eubacteriales.f\_\_Clostridia

FDR:  $1.424e-05$   
Coefficient:  $-1.24e+03$   
Value:  $\delta$

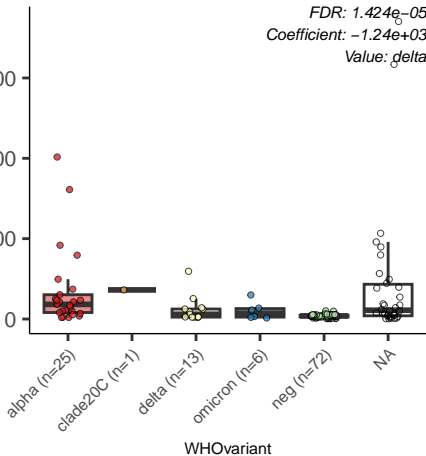

Firmicutes.c\_\_Clostridia.o\_\_Eubacteriales.f\_\_Clostridiaceae.g\_\_Ha

FDR:  $1.424e-05$   
Coefficient:  $-1.24e+03$   
Value: delta

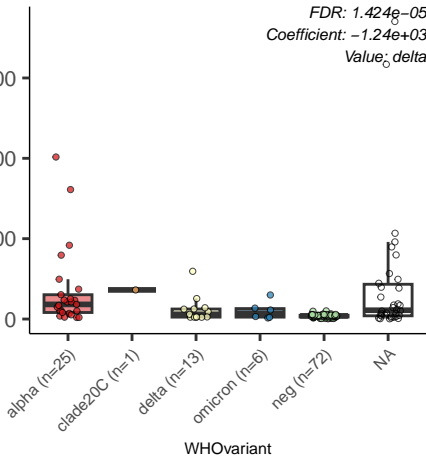

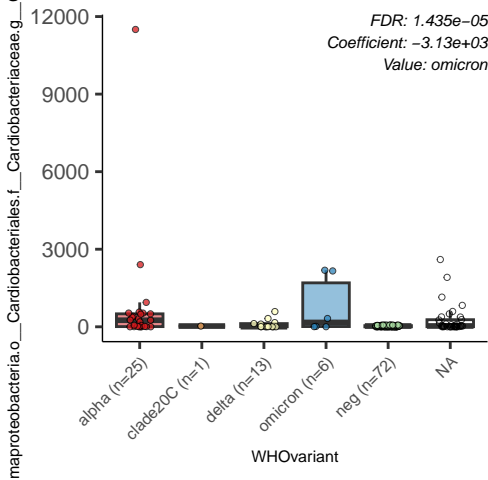

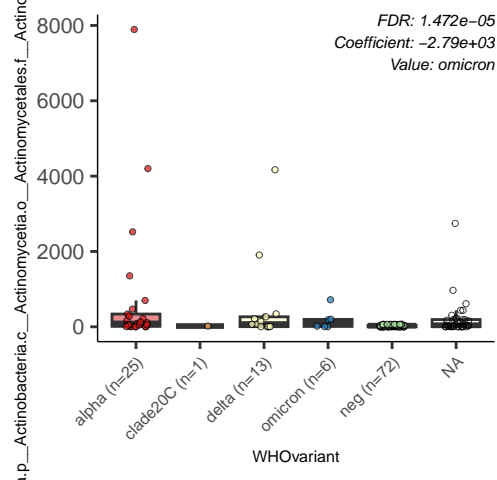

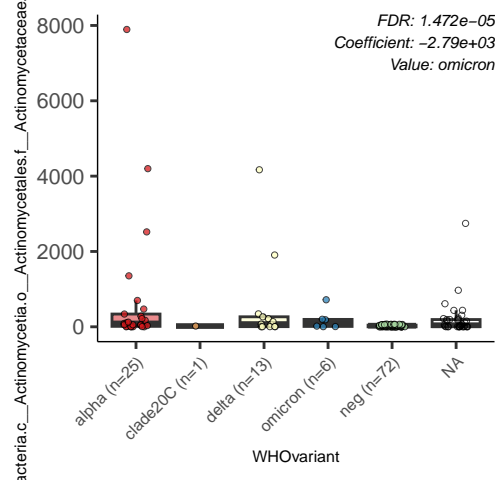

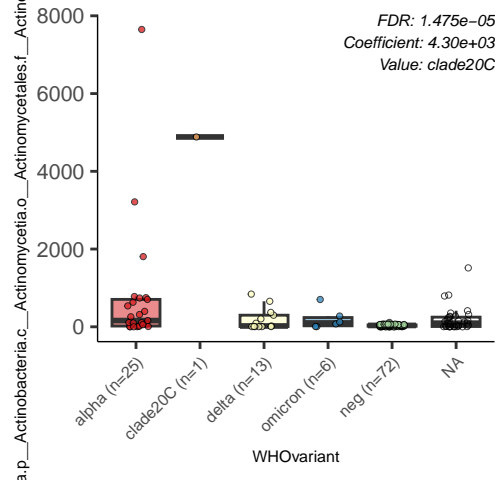

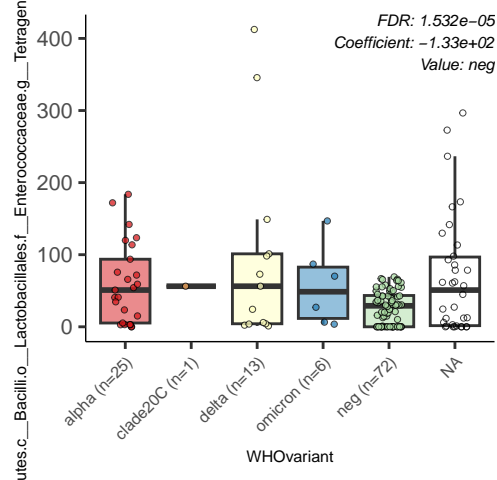

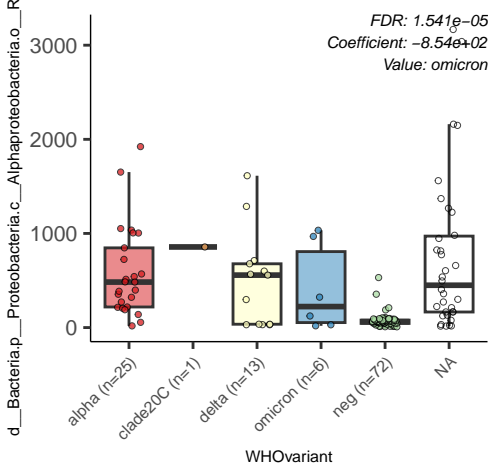



bacteria.c\_Actinomycetia.o\_Actinomycetales.f\_Actinomycetaceae

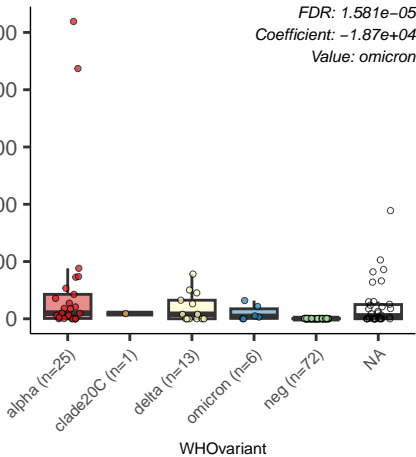

bacteria.p\_\_Proteobacteria.c\_\_Alphaproteobacteria.o\_\_Rhodospirilla

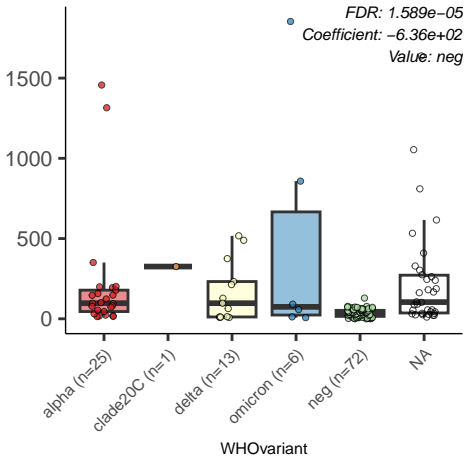

Firmicutes.c\_\_Clostridia.o\_\_Eubacteriales.f\_\_Clostridiaceae.g\_\_Clo

FDR: 1.590e-05  
Coefficient: -6.83e+02  
Value: omicron

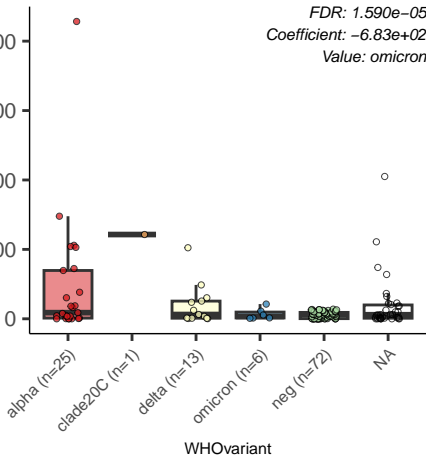

p\_Actinobacteria.c\_Actinomycetia.o\_Micrococcales.f\_Microb

FDR:  $1.615e-05$   
Coefficient:  $-9.15e+03$   
Value: neg

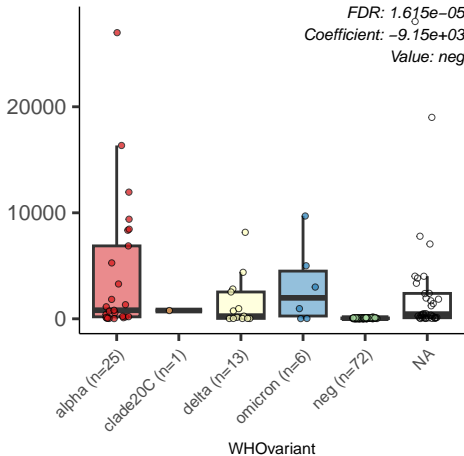



Bacteria.p\_\_Bacteroidetes.c\_\_Flavobacteriia.o\_\_Flavobacteriales.f

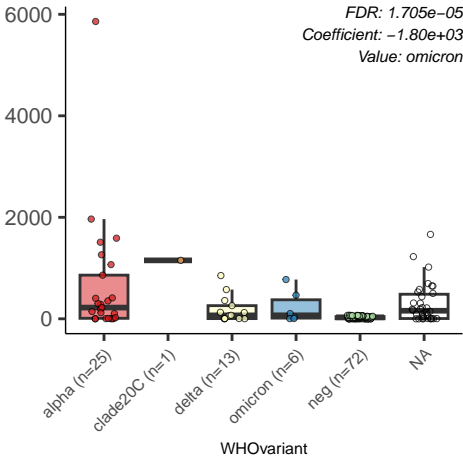

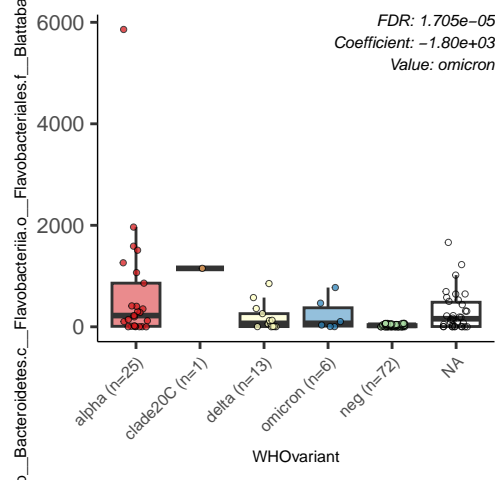

bacteria.c\_\_Actinomycetia.o\_\_Actinomycetales.f\_\_Actinomycetaceae

FDR:  $1.737e-05$   
Coefficient:  $-2.09e+03$   
Value: delta

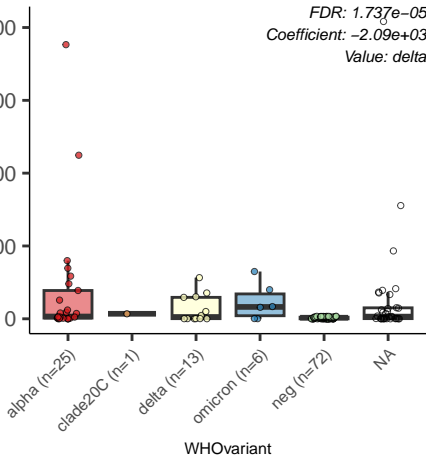



Firmicutes.c\_\_Clostridia.o\_\_Eubacteriales.f\_\_Oscillospiraceae.g\_\_A

*FDR: 1.771e-05*  
*Coefficient: -1.11e+03*  
*Value: omicron*

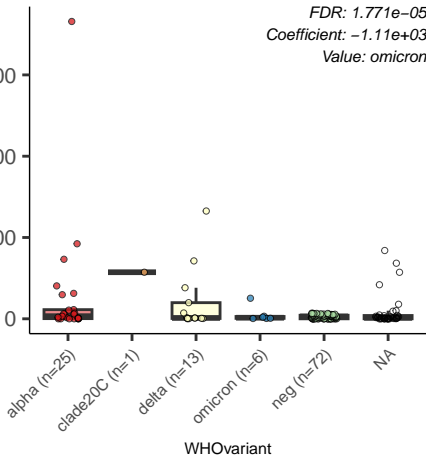

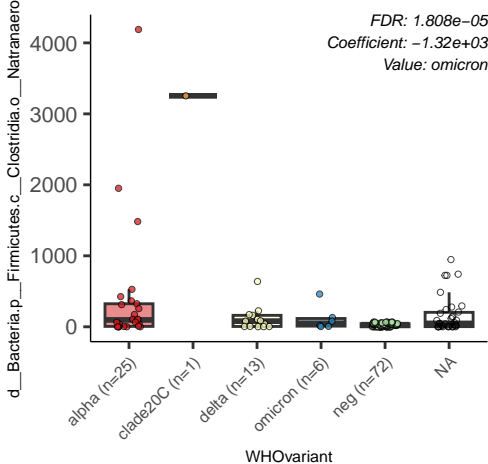

Bacteria.p\_\_Firmicutes.c\_\_Clostridia.o\_\_Eubacteriales.f\_\_Clostridia

FDR:  $1.808e-05$   
Coefficient:  $-1.46e+03$   
Value: omicron

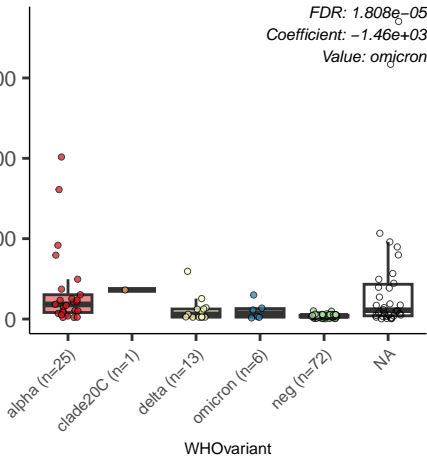

Firmicutes.c\_\_Clostridia.o\_\_Eubacteriales.f\_\_Clostridiaceae.g\_\_Ha

FDR:  $1.808e-05$   
Coefficient:  $-1.46e+03$   
Value: omicron

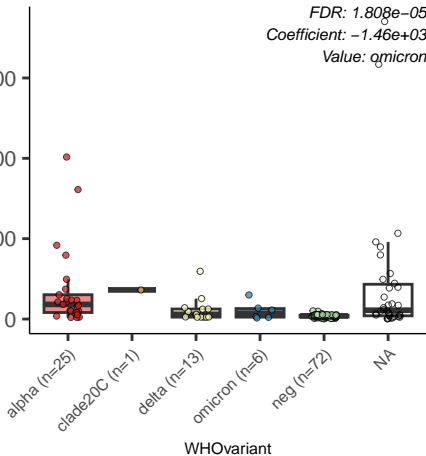

Cyanobacteria.o\_\_Pseudanabaenales.f\_\_Leptolyngbyaceae.g\_\_Lep

FDR: 1.819e-05  
Coefficient: -3.23e+03  
Value: omicron

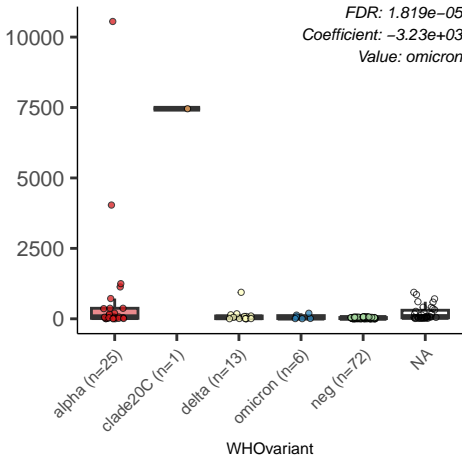

o\_Actinobacteria.c\_Actinomycetia.o\_Streptosporangiales.f\_No

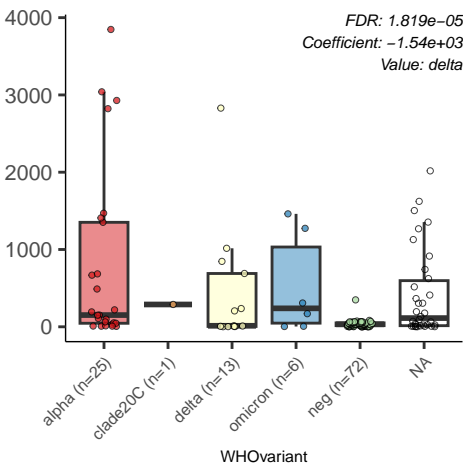

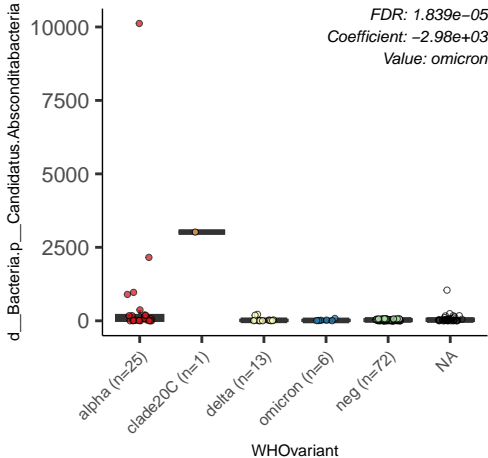

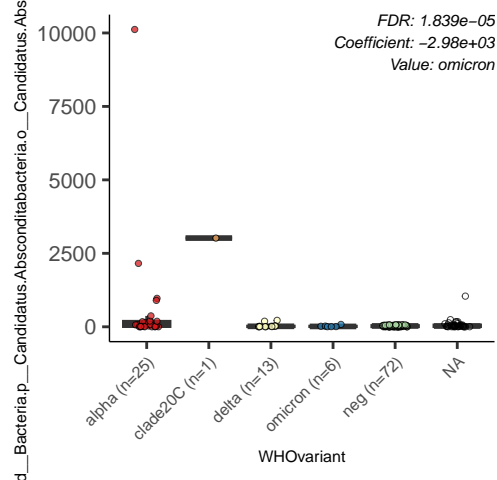





nditabacteria.o\_\_Candidatus.Absconditabacterales.f\_\_Candidatus.A

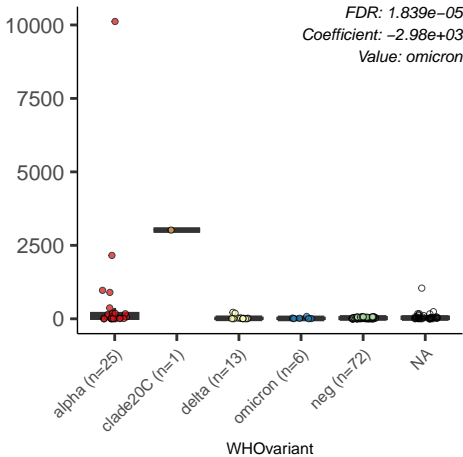

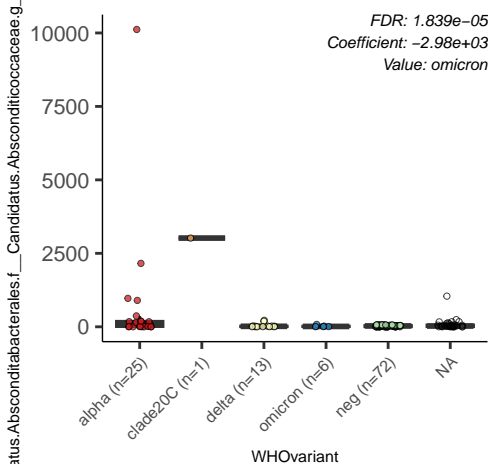

3acteria.p\_\_Proteobacteria.c\_\_Gammaproteobacteria.o\_\_Thiotricha

FDR:  $1.839e-05$   
Coefficient:  $-1.97e+02$   
Value: neg

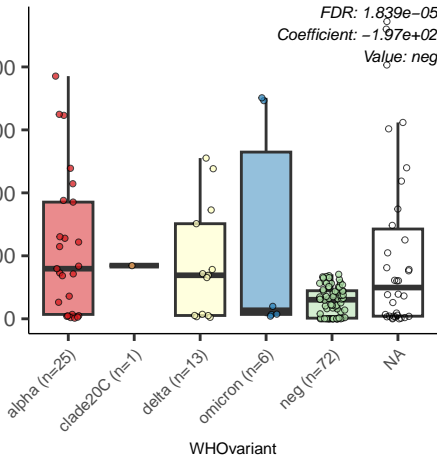

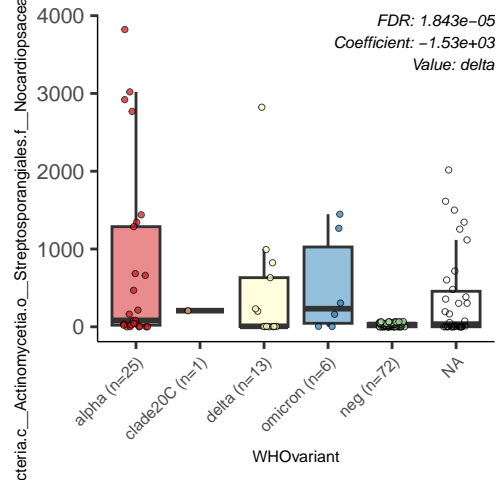

d\_Bacteria.c\_\_Candidatus.Babeliae

FDR:  $1.846e-05$   
Coefficient:  $-1.11e+02$   
Value: neg

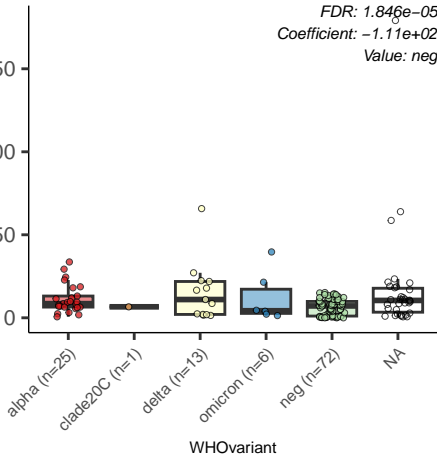

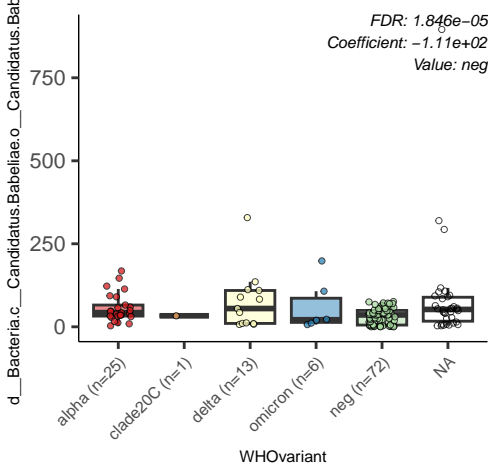

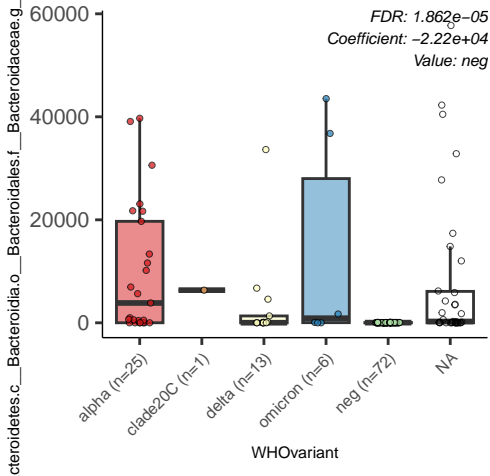



Bacteria.p\_Firmicutes.c\_Clostridia.o\_Eubacteriales.f\_\_Vallitale

FDR:  $1.862e-05$   
Coefficient:  $-6.94e+02$   
Value: omicron

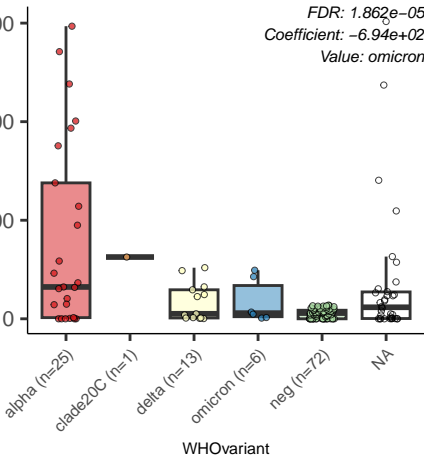

Firmicutes.c\_\_Clostridia.o\_\_Eubacteriales.f\_\_Vallitaleaceae.g\_\_Pet

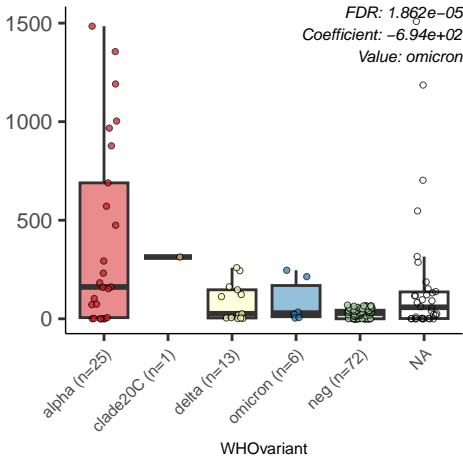

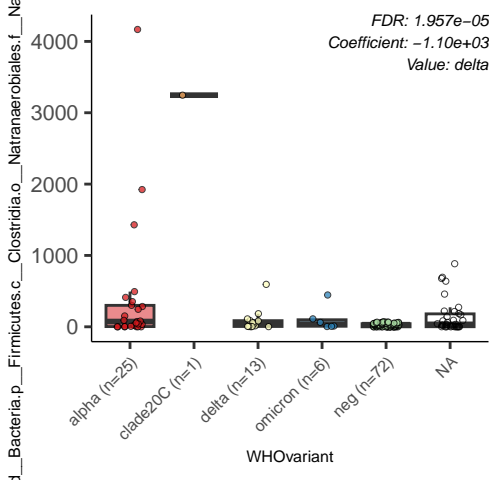

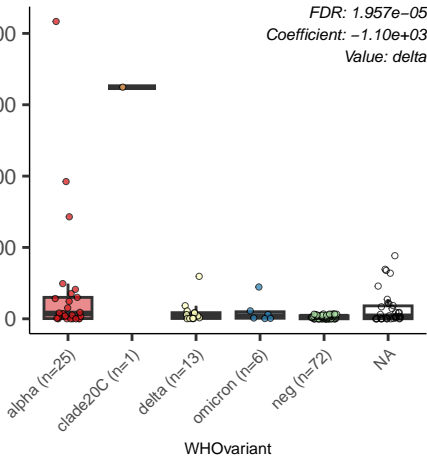

c\_\_Clostridia.o\_\_Natranaerobiales.f\_\_Natranaerofabaceae.g\_\_Natra

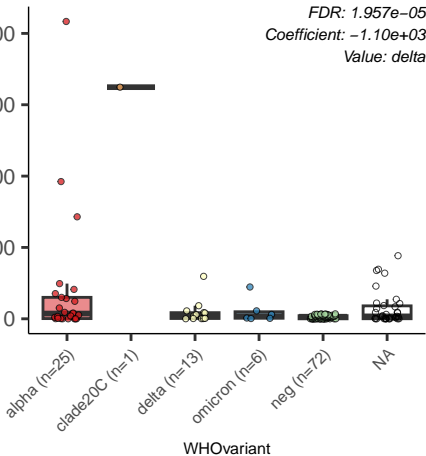

d\_Bacteria.p\_Actinobacteria.c\_Acidimicrobia.o\_Acidimicrobia

FDR:  $2.025e-05$   
Coefficient:  $-1.85e+02$   
Value: neg

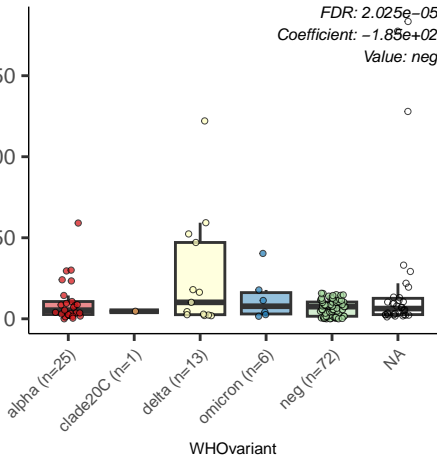

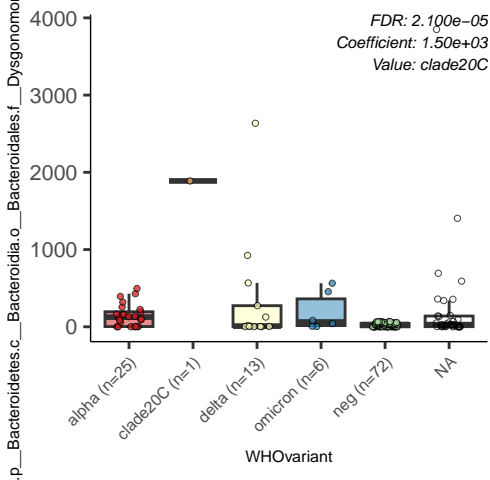

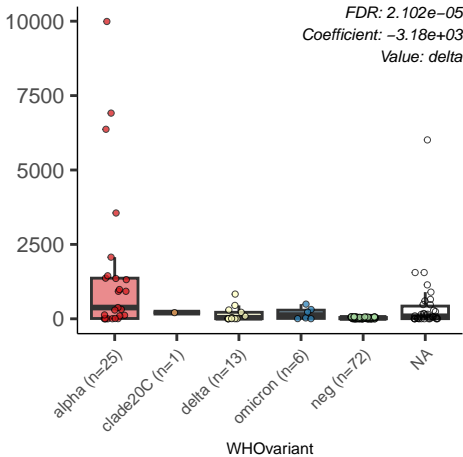



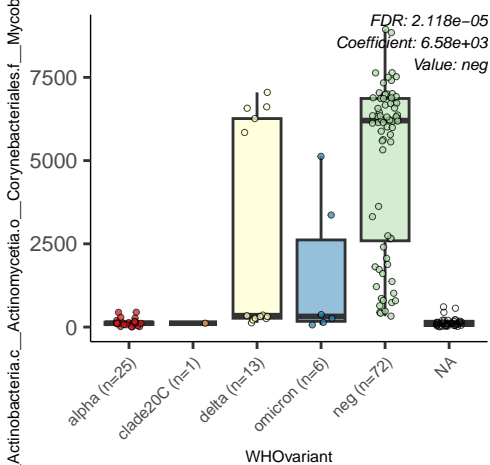

tertia.p\_\_Proteobacteria.c\_\_Deltaproteobacteria.o\_\_Desulfuromonad

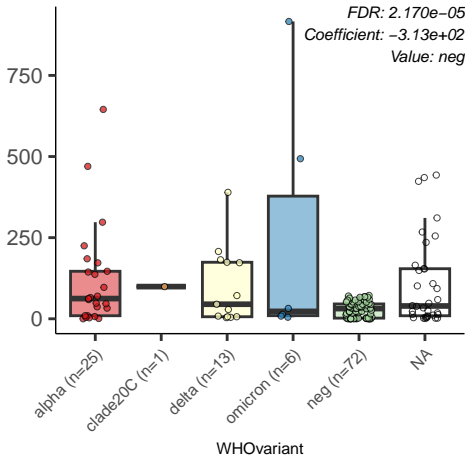

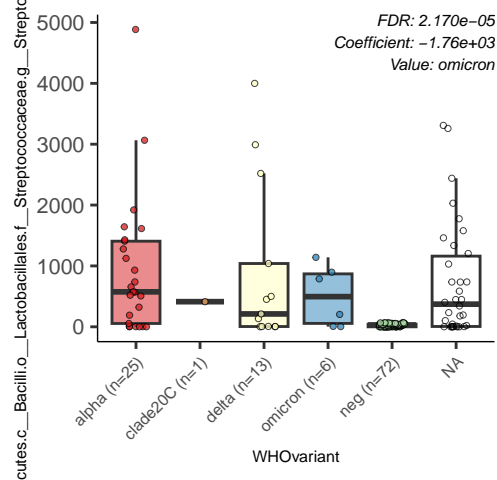

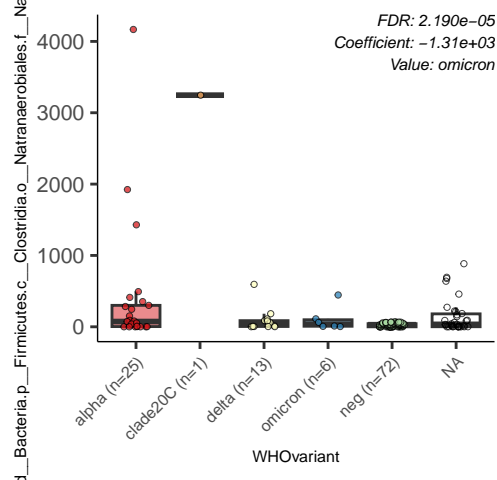

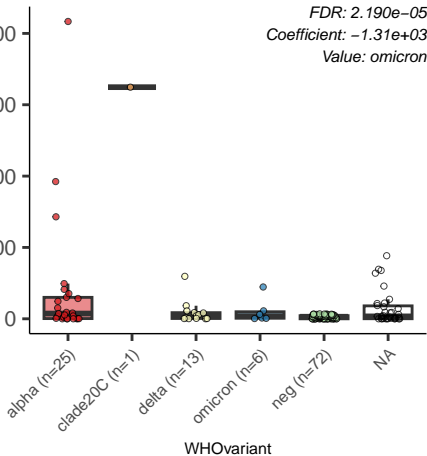

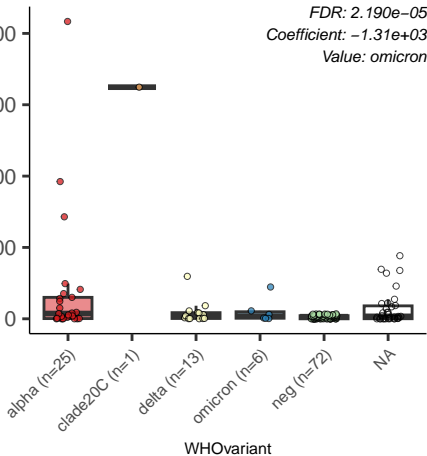

a.p\_\_Proteobacteria.c\_\_Gammaproteobacteria.o\_\_Enterobacterales

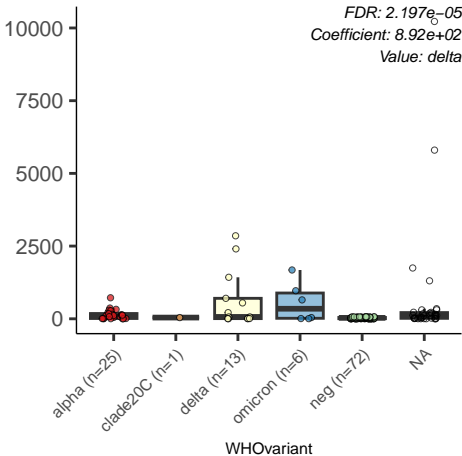

bbacteria.c\_Actinomycetia.o\_Actinomycetales.f\_Actinomycetaceae

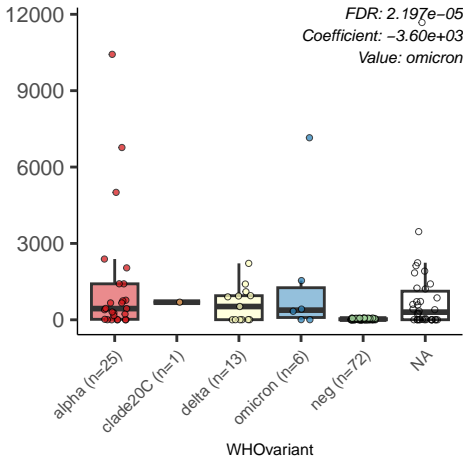



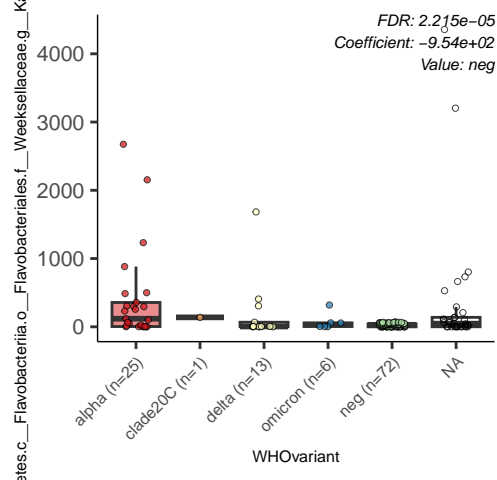

rmicutes.c\_\_Clostridia.o\_\_Eubacteriales.f\_\_Lachnospiraceae.g\_\_Ar

FDR: 2.246e-05  
Coefficient: -2.49e+03  
Value: neg

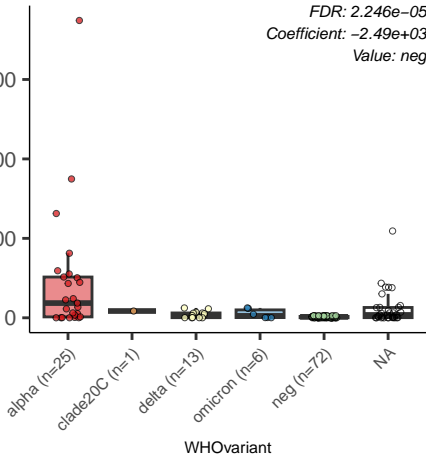

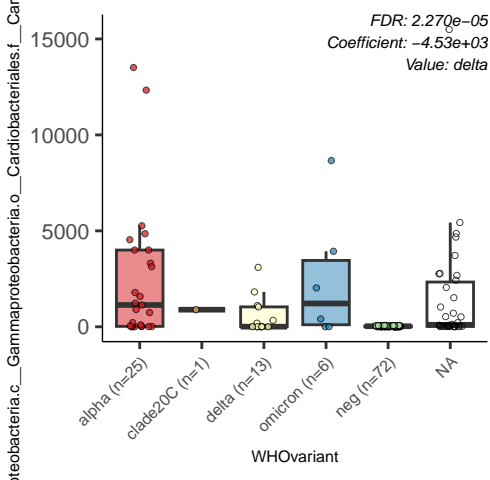

Firmicutes.c\_\_Clostridia.o\_\_Eubacteriales.f\_\_Clostridiaceae.g\_\_Cl

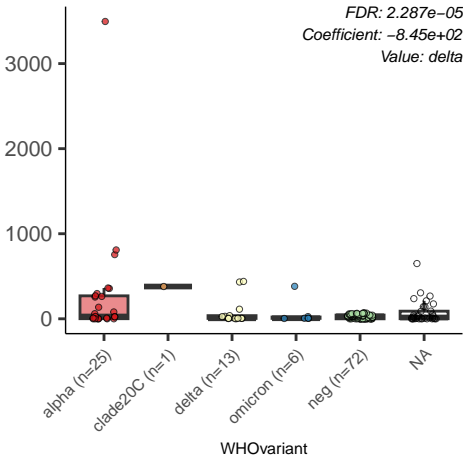

d\_\_Bacteria.p\_\_Cyanobacteria.o\_\_Pseudanabaena

FDR: 2.331e-05  
Coefficient: -3.79e+03  
Value: omicron

10000

5000

0

alpha (n=25)

clade20C (n=1)

delta (n=13)

omicron (n=6)

neg (n=72)

NA

WHOvariant

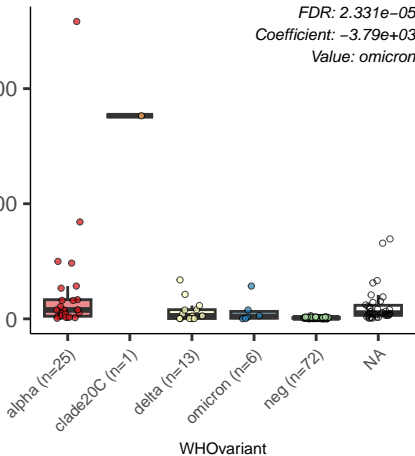

eria.p\_\_Firmicutes.c\_\_Clostridia.o\_\_Eubacteriales.f\_\_Oscillospiraceae

FDR:  $2.382e-05$   
Coefficient:  $-1.40e+03$   
Value: omicron

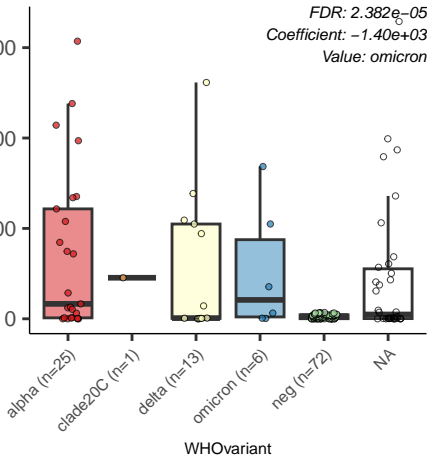

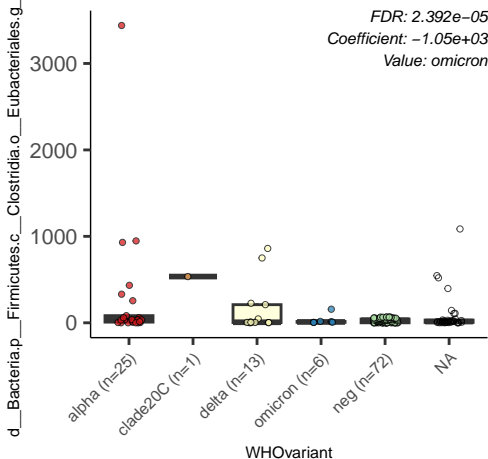

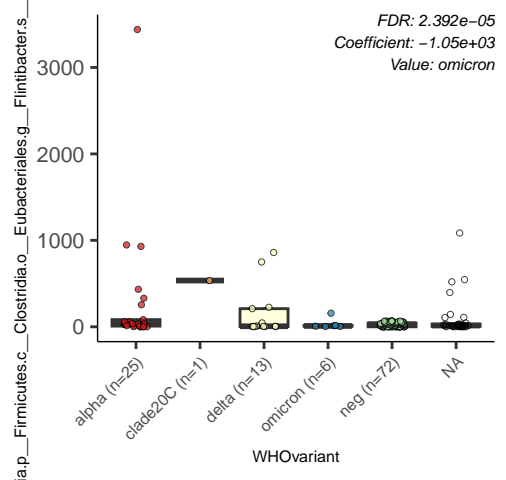



\_Firmicutes.c\_\_Bacilli.o\_\_Bacillales.f\_\_Paenibacillaceae.g\_\_Paeniba

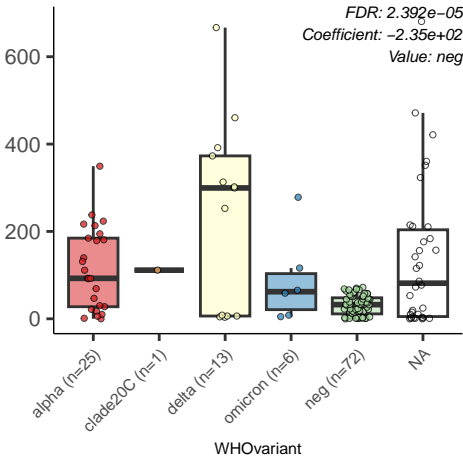

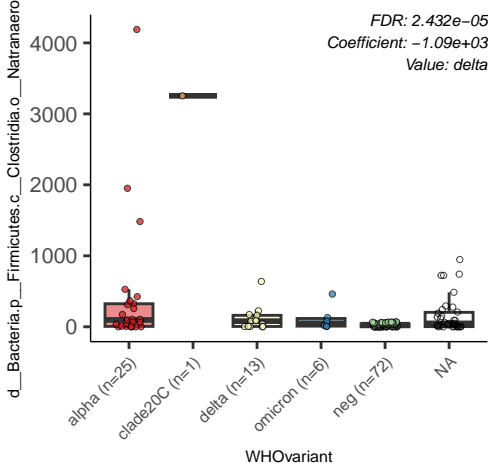

tes.c\_\_Bacilli.o\_\_Lactobacillales.f\_\_Streptococcaceae.g\_\_Streptococcus

FDR:  $2.459e-05$   
Coefficient:  $-2.82e+04$   
Value: neg

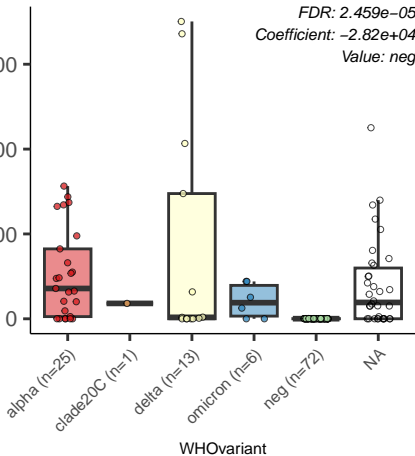

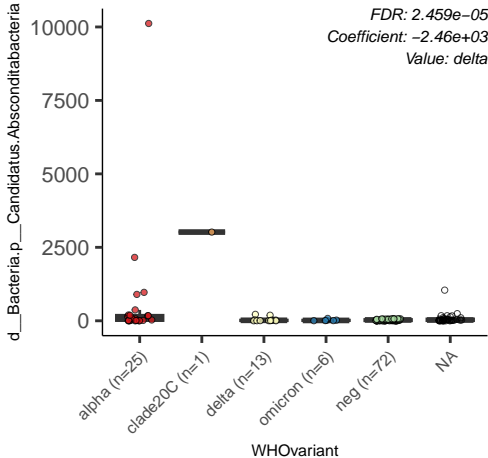

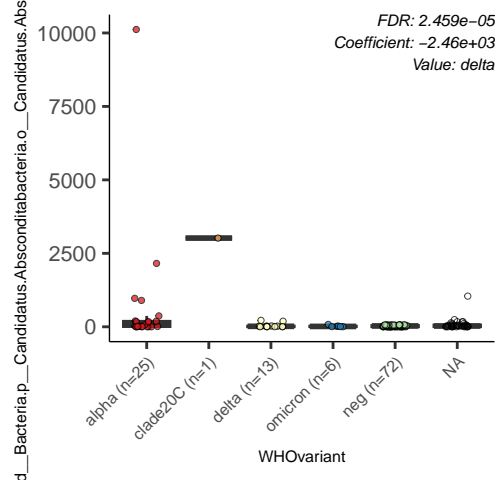

candidatus.Absconditabacteria.o\_\_Candidatus.Absconditabacterales.

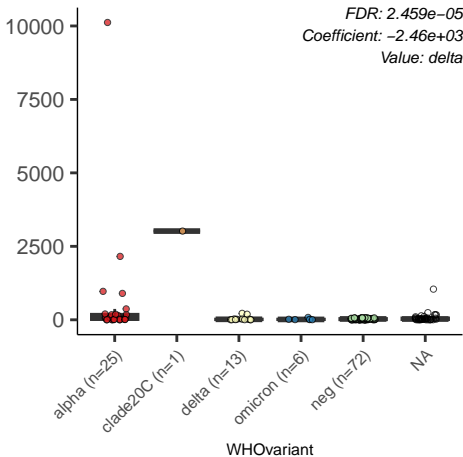

nditabacteria.o\_\_Candidatus.Absconditabacterales.f\_\_Candidatus.A

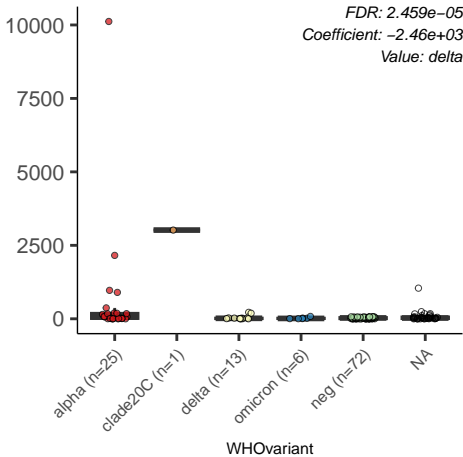

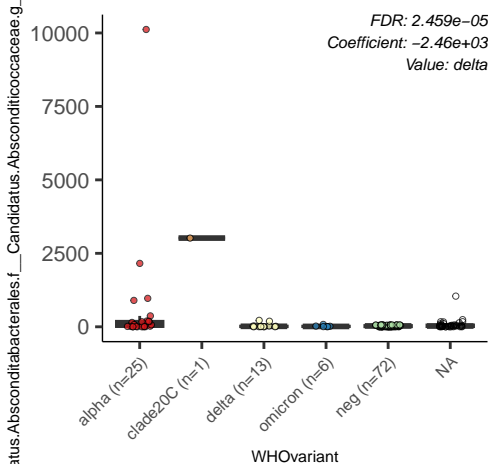



d\_Bacteria.p\_Bacteroidetes.c\_Bacteroidia.o\_Bacteroidales.f

FDR:  $2.474e-05$   
Coefficient:  $-1.04e+03$   
Value: neg

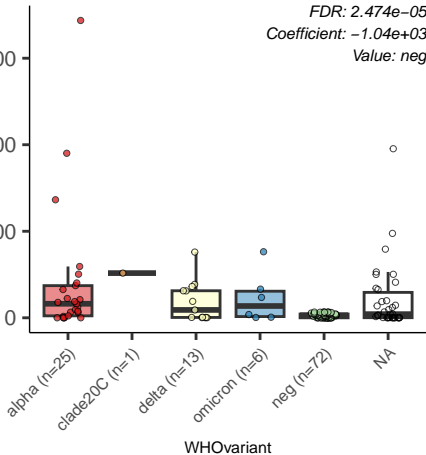



detes.c\_\_Bacteroidia.o\_\_Bacteroidales.f\_\_Paludibacteraceae.g\_\_Pa

*FDR: 2.474e-05*  
*Coefficient: -1.04e+03*  
*Value: neg*

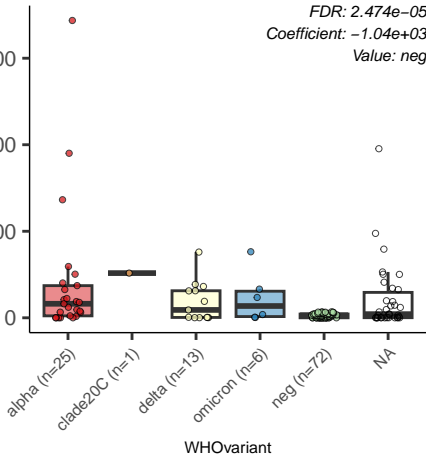

Actinomycetia.o\_\_Corynebacteriales.f\_\_Corynebacteriaceae.g\_\_Co

*FDR: 2.474e-05*  
*Coefficient: -1.35e+03*  
*Value: neg*

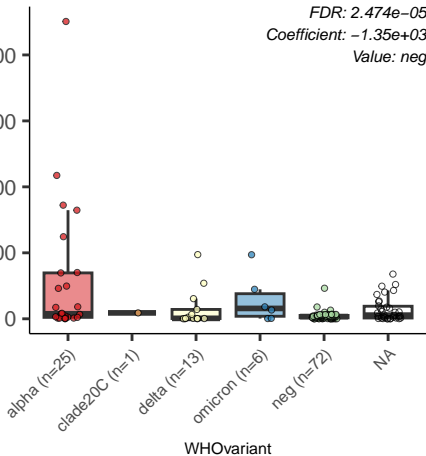

NA

FDR: 2.497e-05  
Coefficient: -1.65e+02  
Value: neg

c\_\_Gammaproteobacteria.o\_\_Oceanospirillales.f\_\_Halomonadaceae

FDR:  $2.503e-05$   
Coefficient:  $-2.02e+04$   
Value: omicron

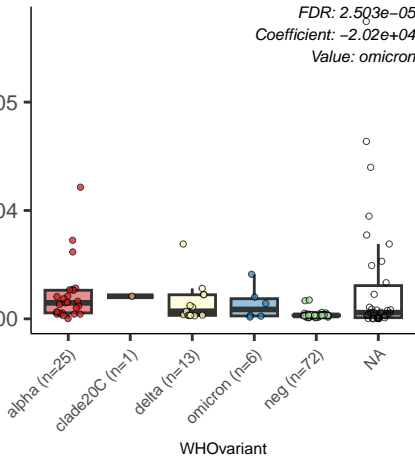

bacteria.c\_Actinomycetia.o\_Actinomycetales.f\_Actinomycetaceae

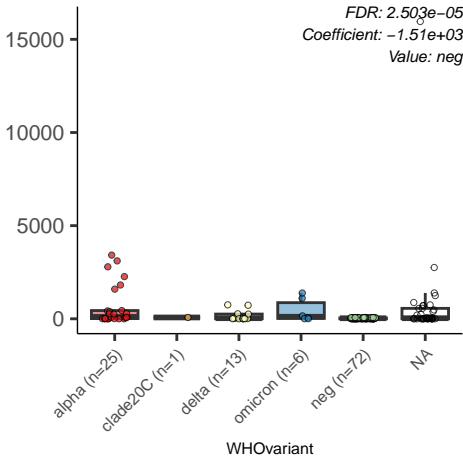

bacteria.c\_\_Fusobacteriia.o\_\_Fusobacteriales.f\_\_Leptotrichiaceae.g

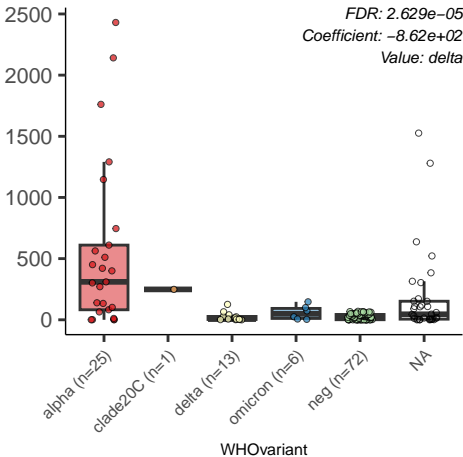



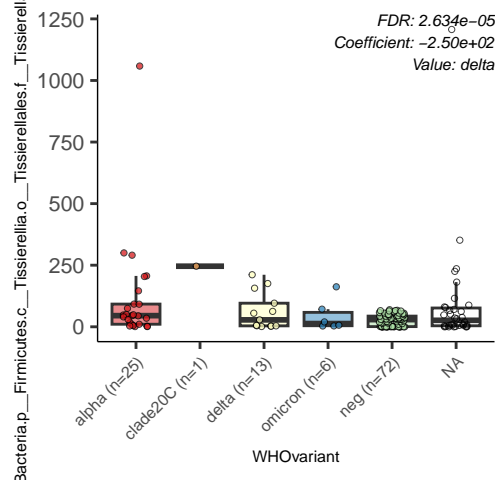

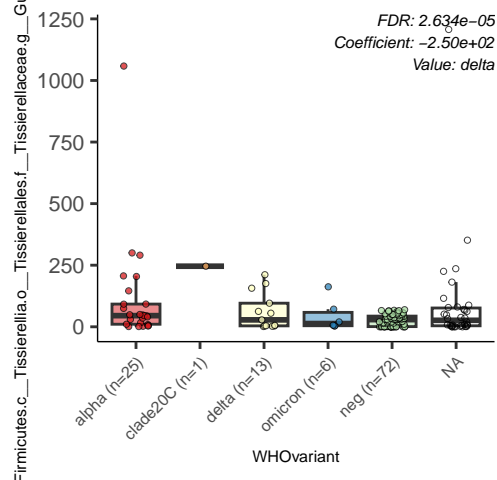

irmicutes.c\_\_Bacilli.o\_\_Lactobacillales.f\_\_Lactobacillaceae.g\_\_Lact

*FDR: 2.676e-05*  
*Coefficient: -1.13e+03*  
*Value: omicron*

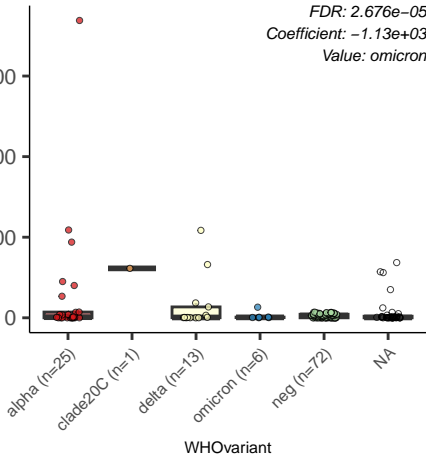

acteria.p\_\_Firmicutes.c\_\_Clostridia.o\_\_Eubacteriales.f\_\_Lachnospira

FDR:  $2.687e-05$   
Coefficient:  $-2.13e+03$   
Value: delta

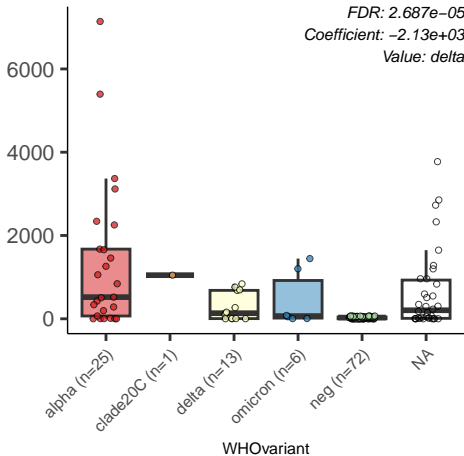

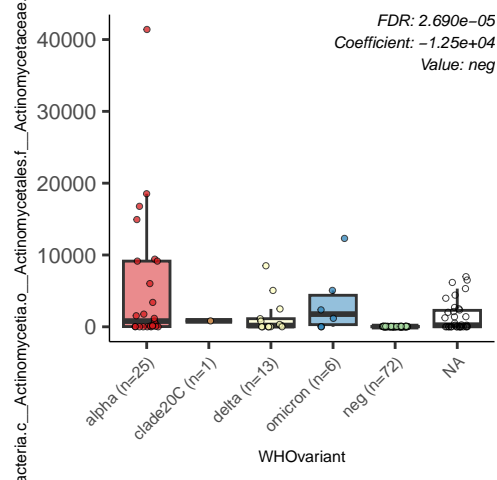

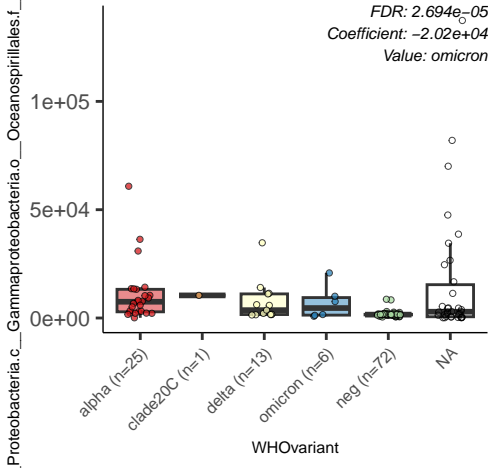

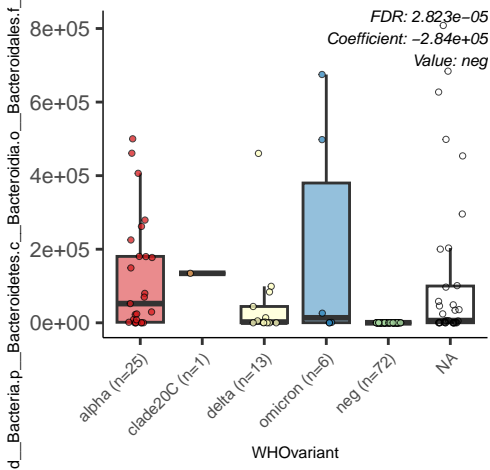

d\_Bacteria.p\_\_Proteobacteria.c\_\_Gammaproteobacteria.o\_\_Ca

FDR:  $2.853e-05$   
Coefficient:  $-4.85e+03$   
Value: delta

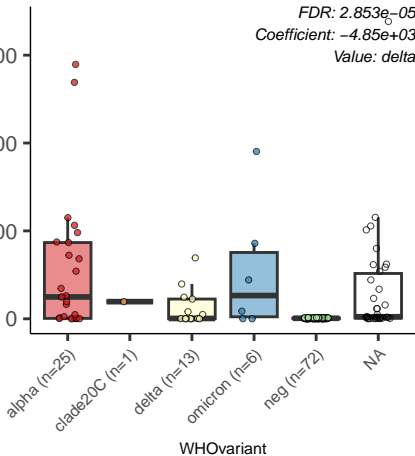



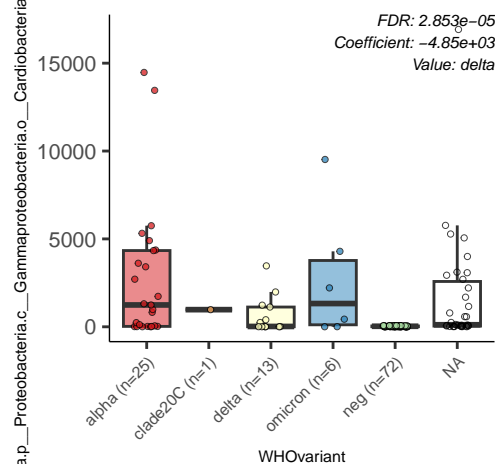



a.p\_\_Tenericutes.c\_\_Mollicutes.o\_\_Acholeplasma.tales.f\_\_Acholepla

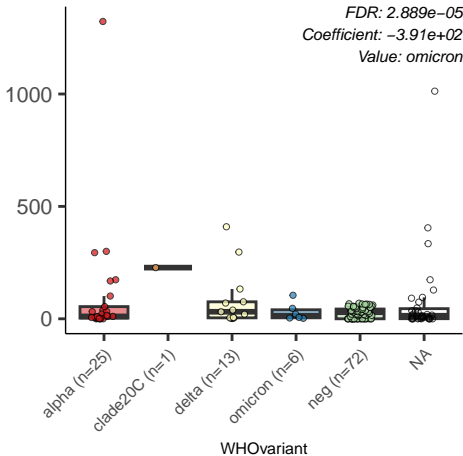

FDR: 2.889e-05  
Coefficient: -3.91e+02  
Value: omicron

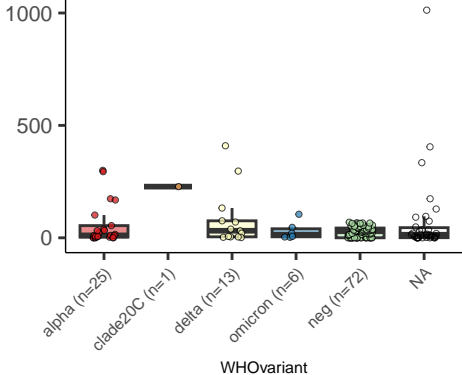

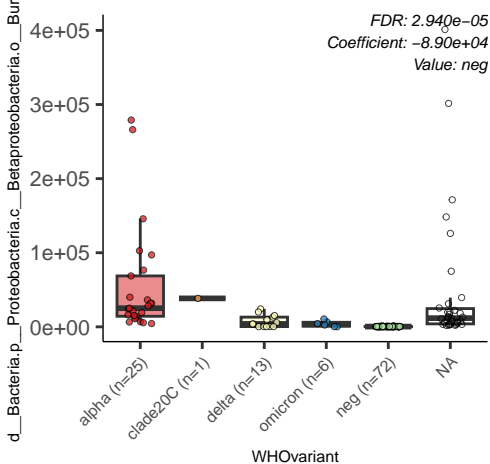

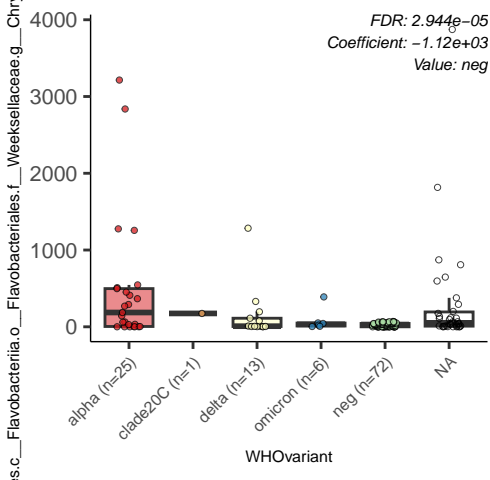

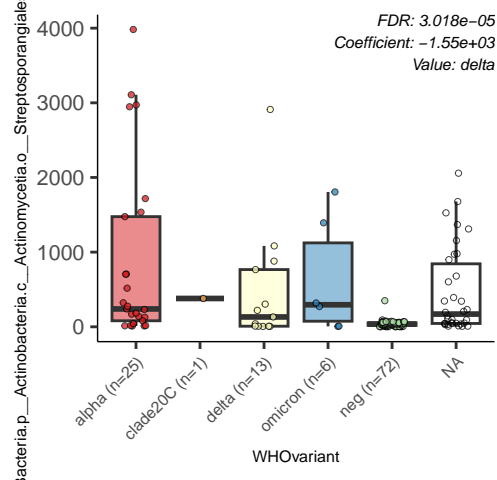





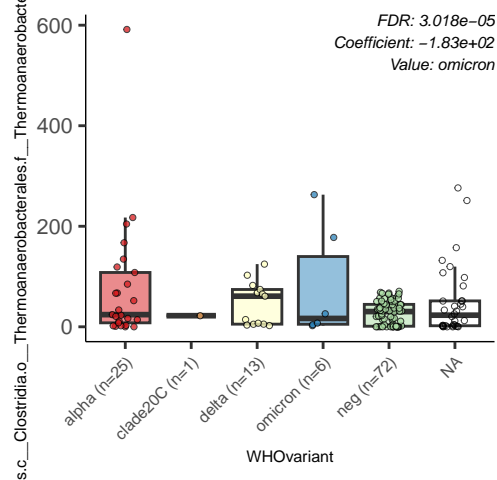

ia.o\_\_Thermoanaerobacterales.f\_\_Thermoanaerobacterales.Family

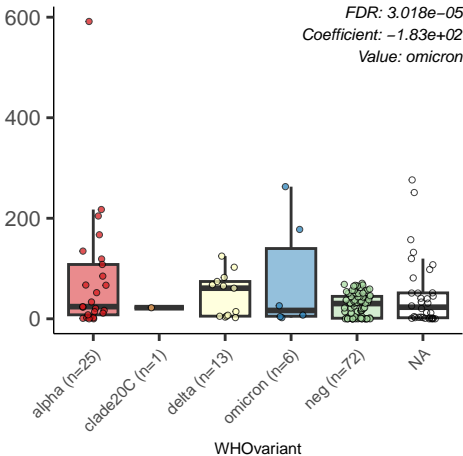

icutes.c\_\_Bacilli.o\_\_Lactobacillales.f\_\_Streptococcaceae.g\_\_Streptococcus

*FDR: 3.060e-05*  
*Coefficient: 1.75e+04*  
*Value: delta*

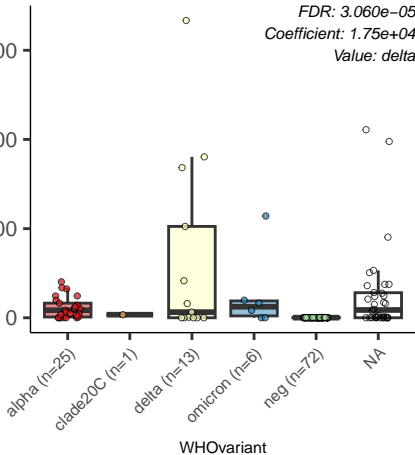

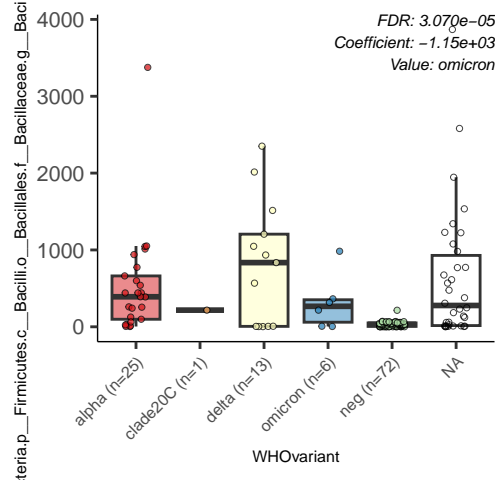

eria.p\_\_Proteobacteria.c\_\_Epsilonproteobacteria.o\_\_Campylobacter

*FDR: 3.140e-05*  
*Coefficient: -1.20e+03*  
*Value: neg*

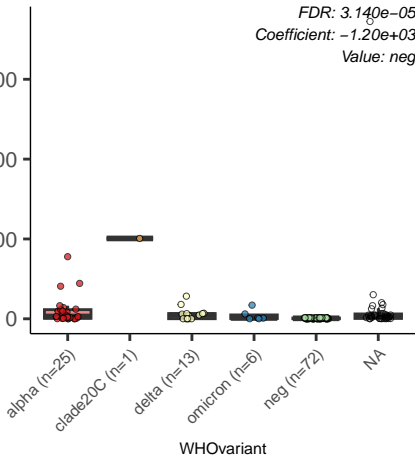

icutes.c\_\_Bacilli.o\_\_Lactobacillales.f\_\_Streptococcaceae.g\_\_Strept

*FDR: 3.220e-05*  
*Coefficient: -5.06e+03*  
*Value: neg*

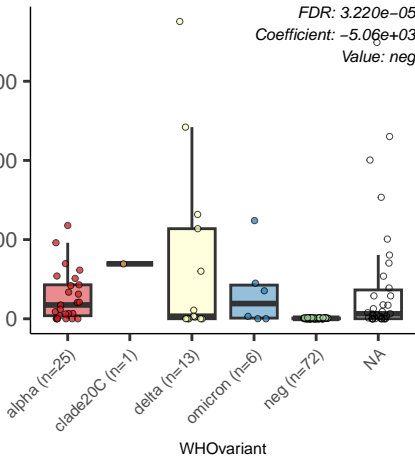

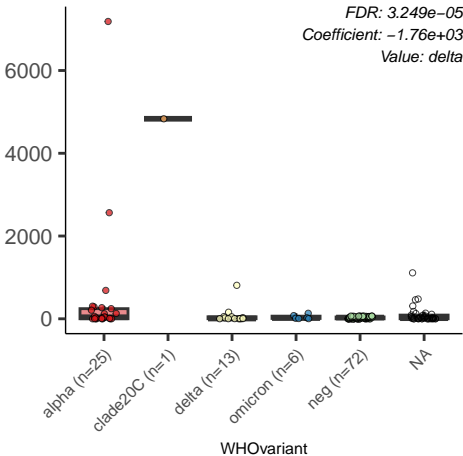

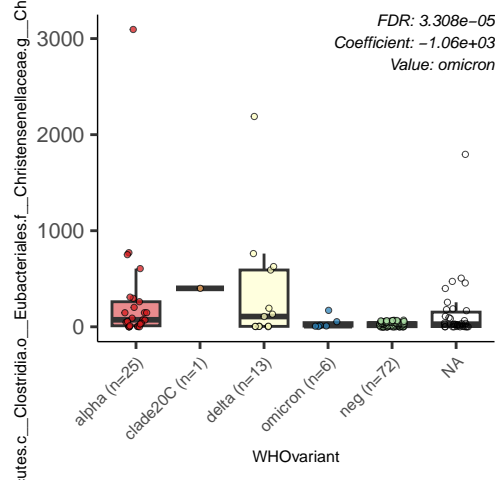



eria.p\_\_Proteobacteria.c\_\_Gammaproteobacteria.o\_\_Oceanospirill

FDR:  $3.357e-05$   
Coefficient:  $-2.01e+04$   
Value: omicron

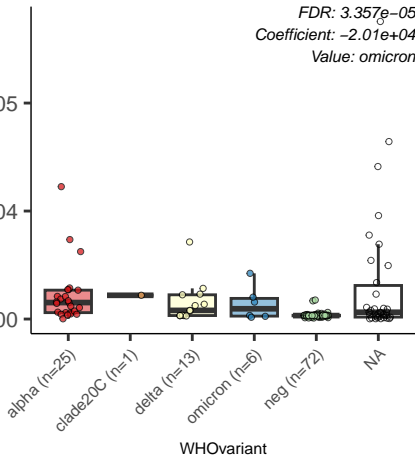

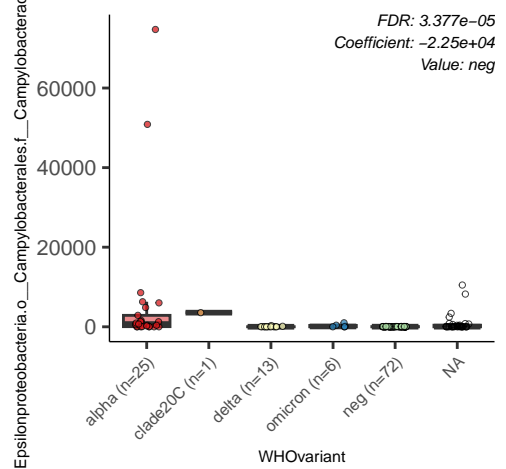

p\_\_Planctomycetes.c\_\_Planctomycetia.o\_\_Planctomycetales.f\_\_Pla

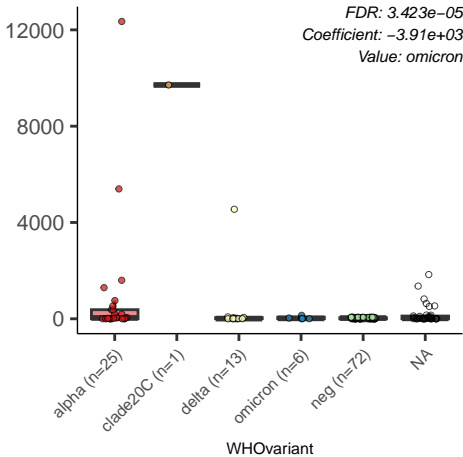

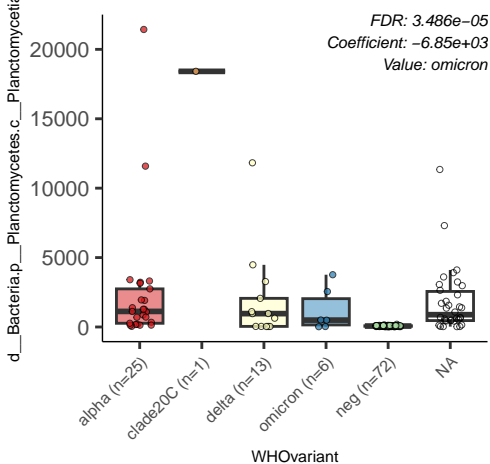

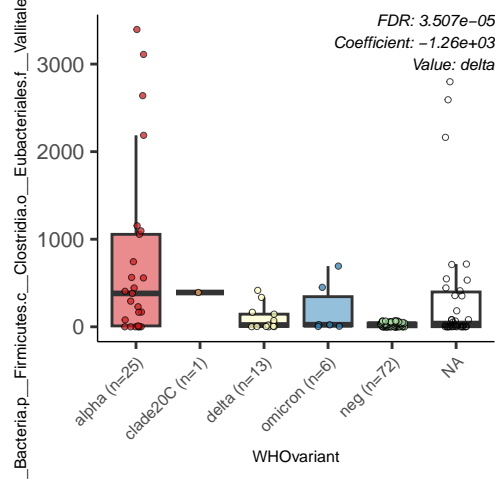

d\_\_Bacteria.p\_\_Planctomycetes

FDR:  $3.513e-05$   
Coefficient:  $-6.92e+03$   
Value: omicron

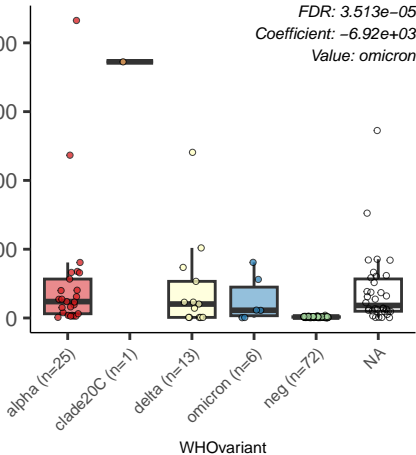

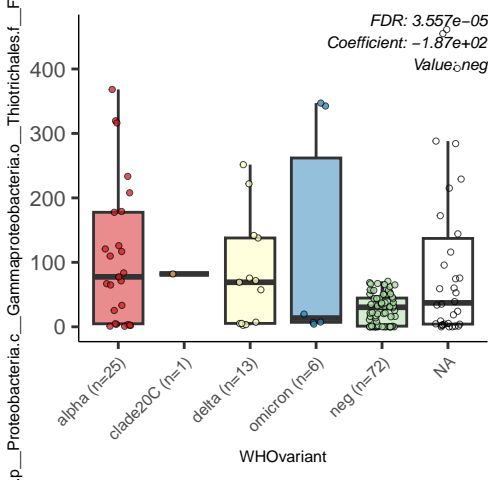

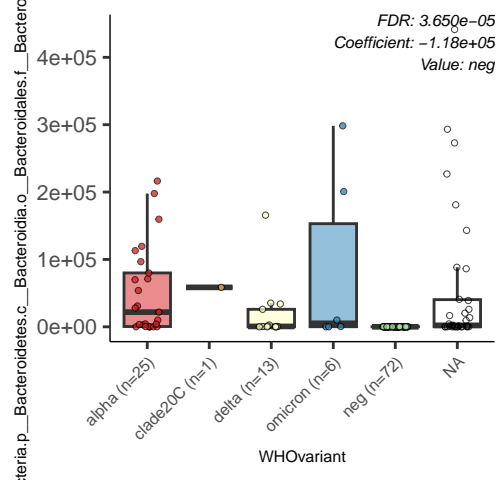



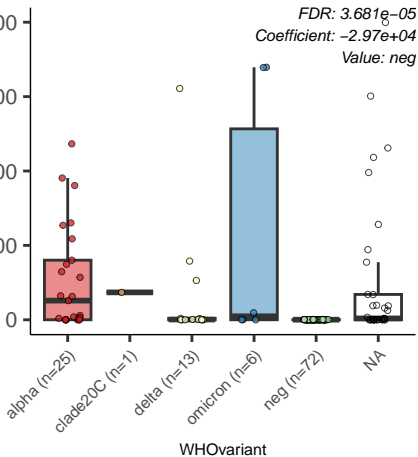

eroidetes.c\_\_Bacteroidia.o\_\_Bacteroidales.f\_\_Tannerellaceae.g\_\_Ta

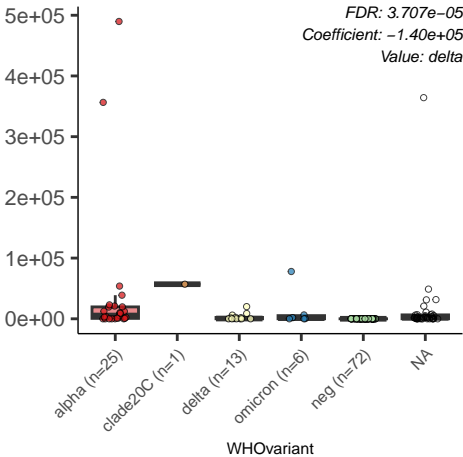

omyces.c\_\_Planctomycetia.o\_\_Planctomycetales.f\_\_Planctomycet

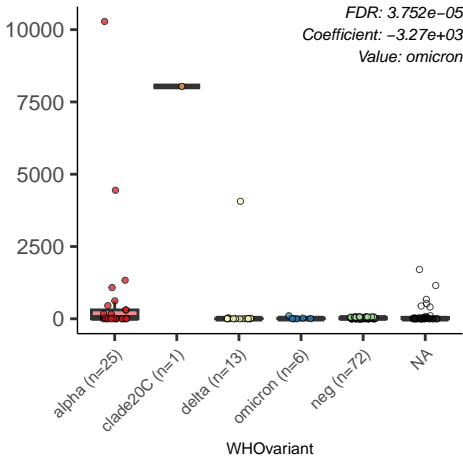

d\_Bacteria.p\_\_Spirochaetes.c\_\_Spirochaetia.o\_\_Spirochaetales

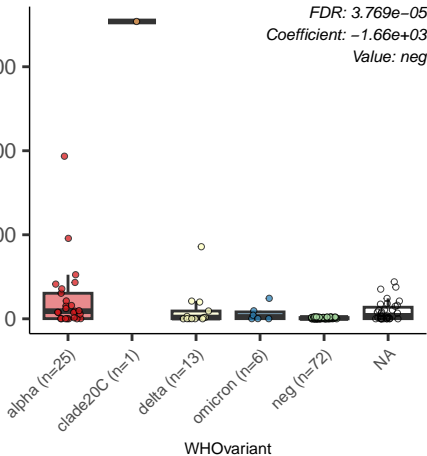

d\_\_Bacteria.p\_\_Proteobacteria.c\_\_Gammaproteobacteria.o\_\_O

FDR:  $3.823e-05$   
Coefficient:  $-2.02e+04$   
Value: omicron

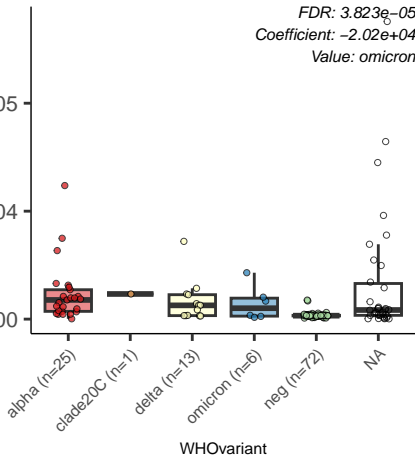

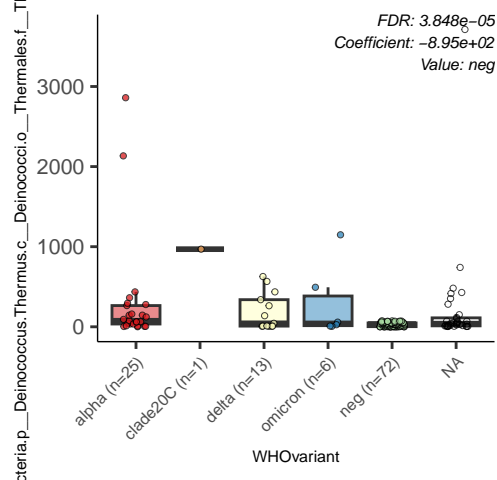

bacteria.p\_\_Spirochaetes.c\_\_Spirochaetia.o\_\_Spirochaetales.f\_\_Bor

*FDR: 3.884e-05*  
*Coefficient: -4.57e+02*  
*Value: neg*

1000

500

0

alpha (n=25)

clade20C (n=1)

delta (n=13)

omicron (n=6)

neg (n=72)

NA

WHOvariant

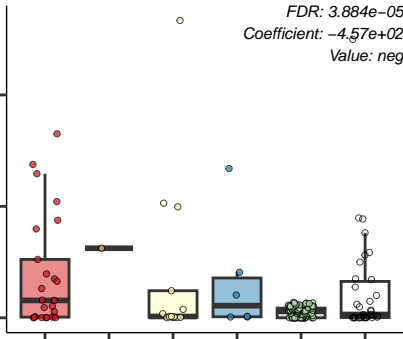

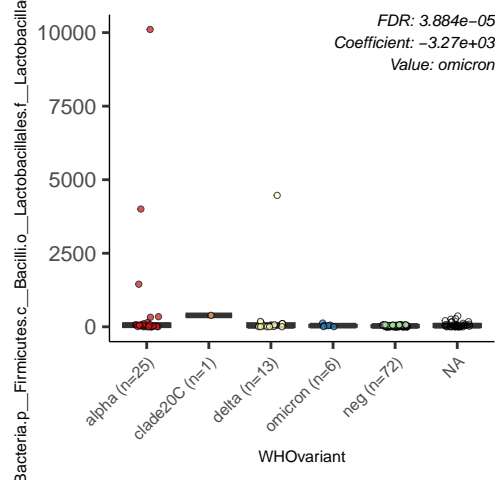



Cyanobacteria.o\_\_Pseudanabaenales.f\_\_Leptolyngbyaceae.g\_\_Lep

FDR:  $3.931e-05$   
Coefficient:  $-2.60e+03$   
Value: delta

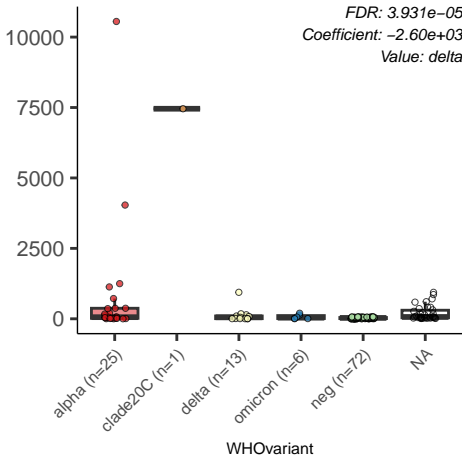

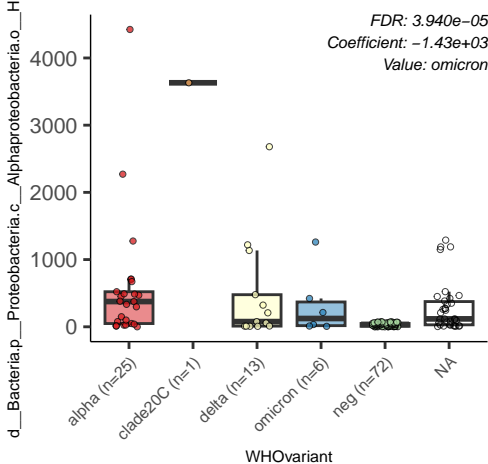

a.p\_\_Actinobacteria.c\_\_Actinomycetia.o\_\_Corynebacteriales.f\_\_No

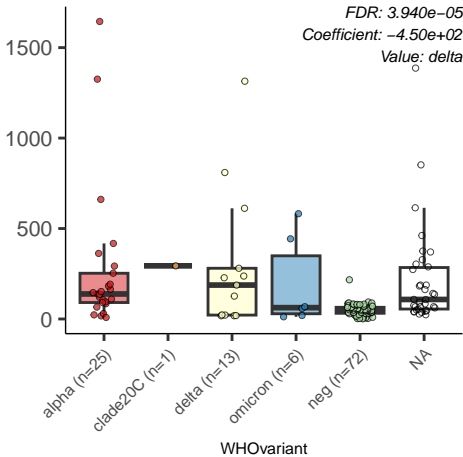

d\_\_Bacteria.p\_\_Cyanobacteria.o\_\_Pseudanabaenales.f\_\_Lept

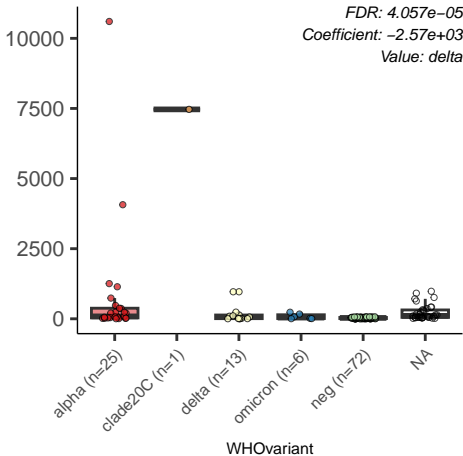

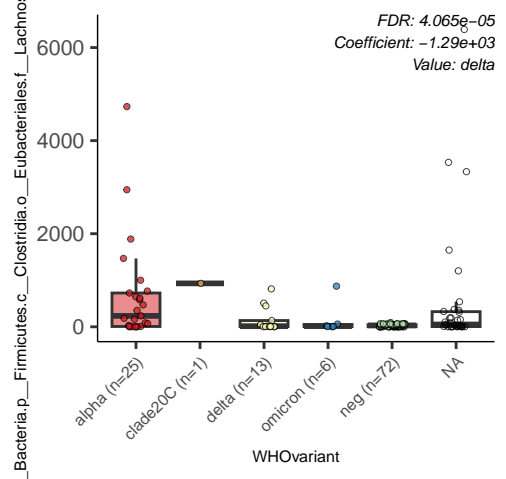

Firmicutes.c\_\_Clostridia.o\_\_Eubacteriales.f\_\_Lachnospiraceae.g

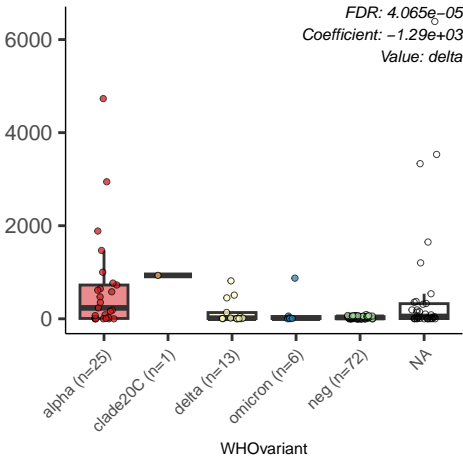

Bacteria.p\_\_Proteobacteria.c\_\_Alphaproteobacteria.o\_\_Holosporal

FDR:  $4.112e-05$   
Coefficient:  $-1.43e+03$   
Value: omicron

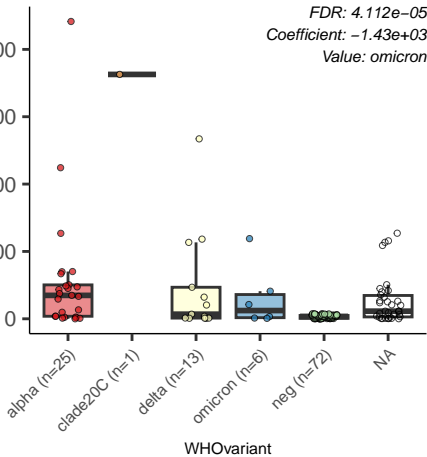

Firmicutes.c\_\_Negativicutes.o\_\_Acidaminococcales.f\_\_Acidaminino

FDR:  $4.171e-05$   
Coefficient:  $-7.94e+02$   
Value: neg

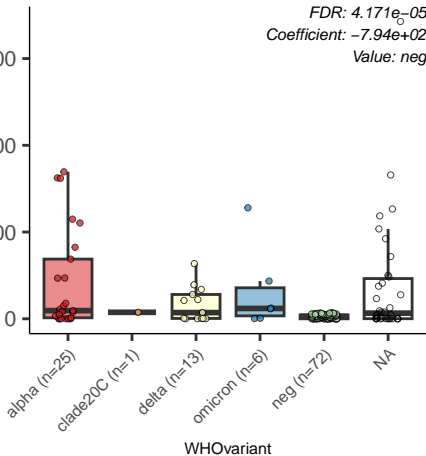



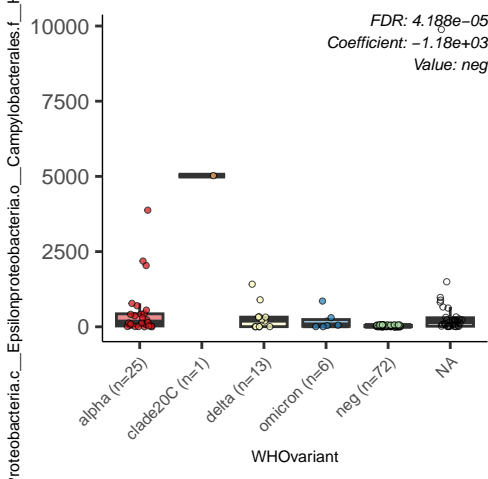

eria.c\_Actinomycetia.o\_Micrococcales.f\_Microbacteriaceae.g

FDR:  $4.218e-05$   
Coefficient:  $-8.66e+03$   
Value: neg

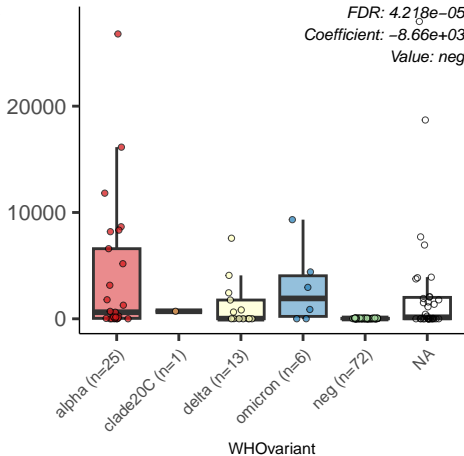

d\_Bacteria.p\_\_Chlorobi

FDR: 4.278e-05

Coefficient: -2.18e+03

Value: delta

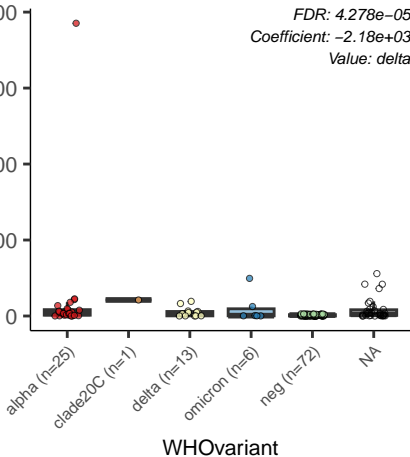

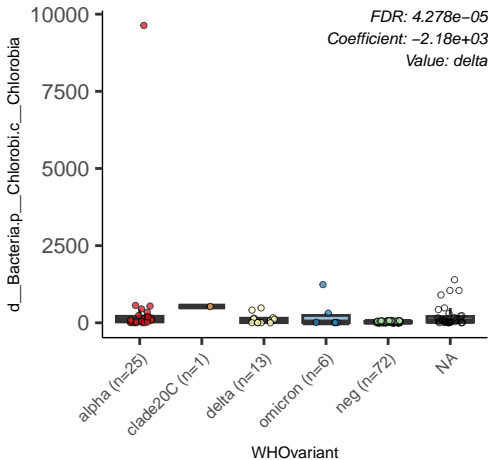

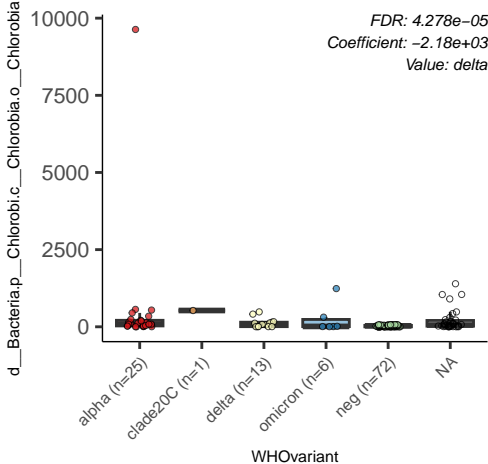

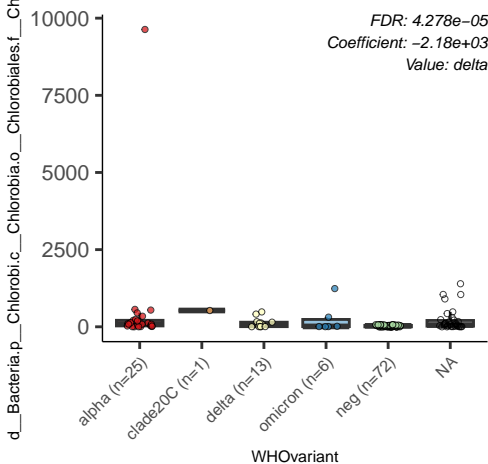

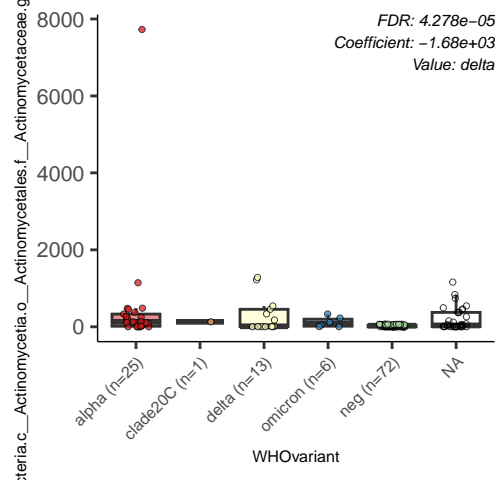

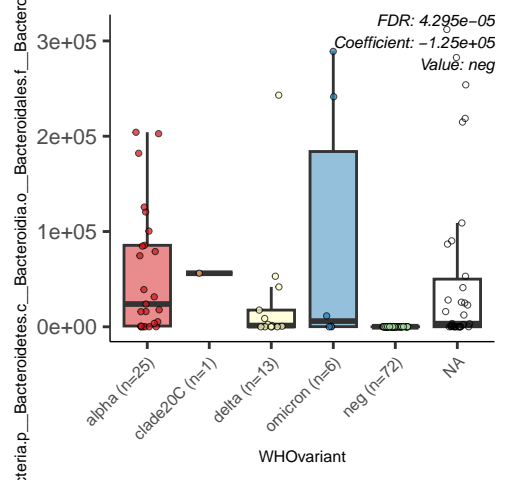



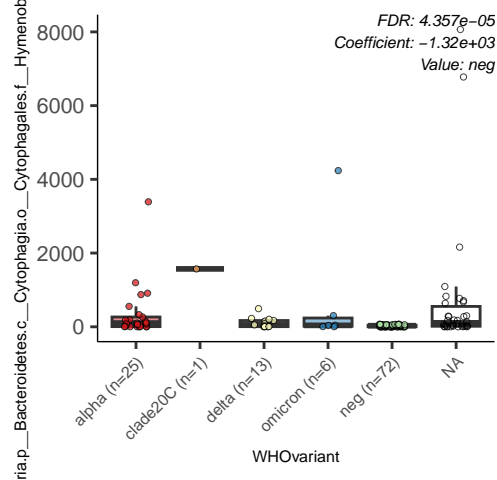

omicutes.c\_\_Clostridia.o\_\_Eubacteriales.f\_\_Oscillospiraceae.g\_\_Ru

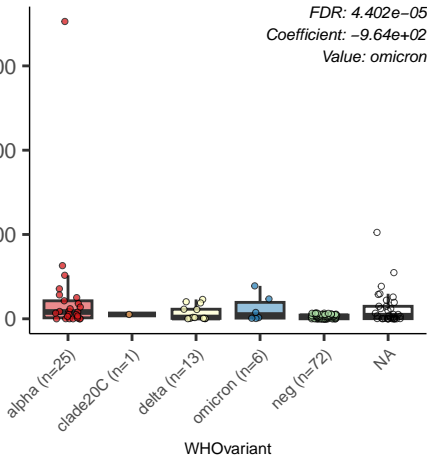

d\_\_Viruses.k\_\_Heunggongvirae.p\_\_Uroviricota.c\_\_Caudoviricetes

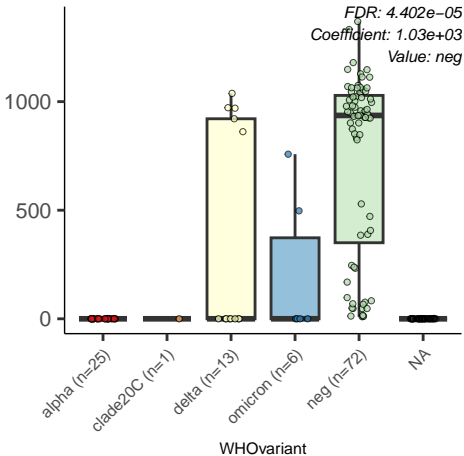

cruses.k\_Heunggongvirae.p\_Uroviricota.c\_Caudoviricetes.f\_Peo

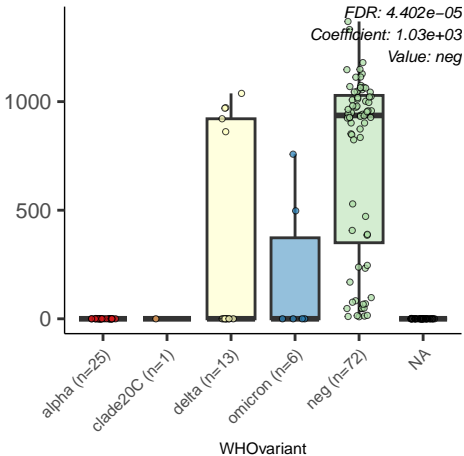

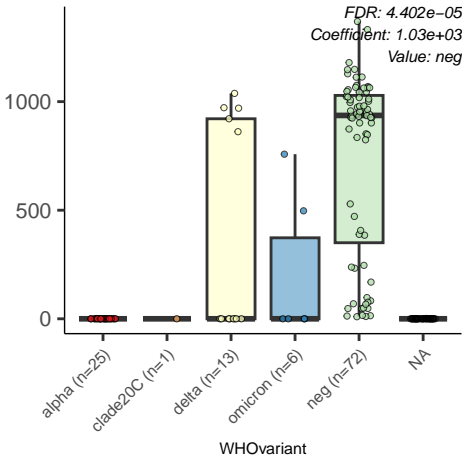

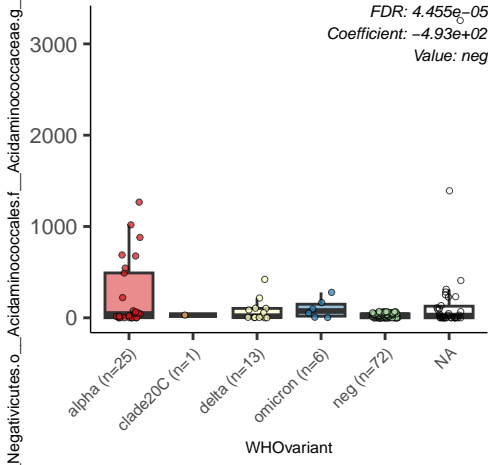

bacteria.c\_Actinomycetia.o\_Actinomycetales.f\_Actinomycetaceae

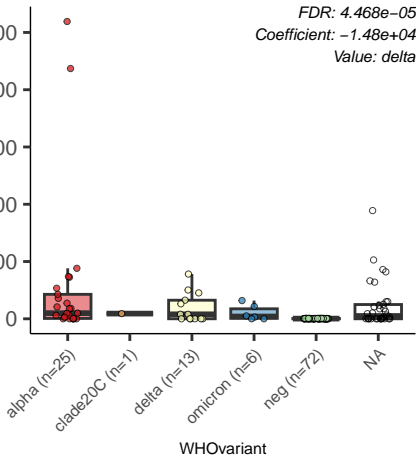

eroidetes.c\_Bacteroidia.o\_Bacteroidales.f\_Bacteroidaceae.g\_P

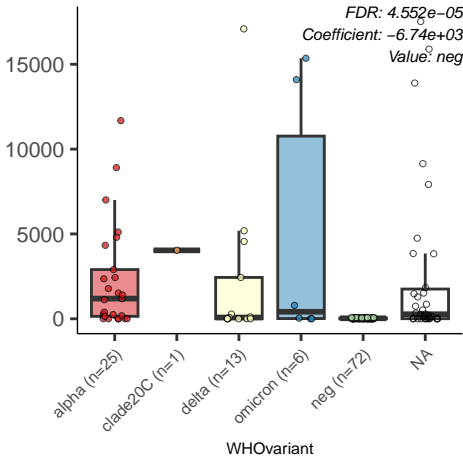



d\_Bacteria.p\_\_Planctomycetes.c\_\_Planctomycetia.o\_\_Plancto

FDR:  $4.575e-05$   
Coefficient:  $-4.07e+03$   
Value: omicron

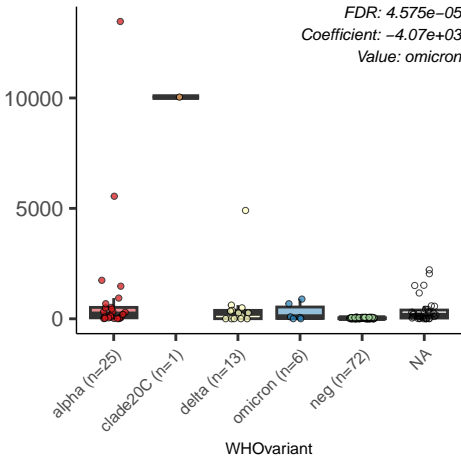

bacteria.p\_\_Planctomycetes.c\_\_Planctomycetia.o\_\_Planctomycetales

FDR:  $4.575e-05$   
Coefficient:  $-4.07e+03$   
Value: omicron

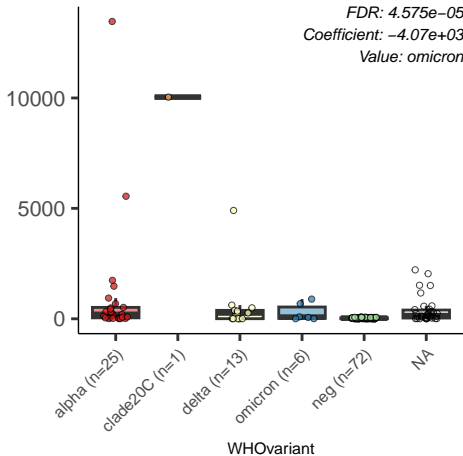

bacteria.p\_\_Cyanobacteria.o\_\_Pseudanabaenales.f\_\_Leptolyngbya

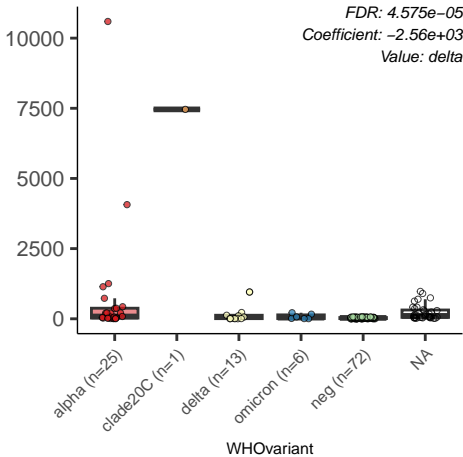

d\_Bacteria.p\_Actinobacteria.c\_Actinomycetia.o\_Streptos

FDR:  $4.584e-05$   
Coefficient:  $-1.58e+03$   
Value: delta

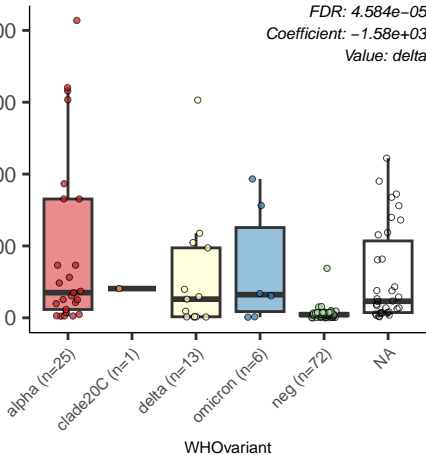

Bacteria.p\_\_Bacteroidetes.c\_\_Flavobacteriia.o\_\_Flavobacteriales.f

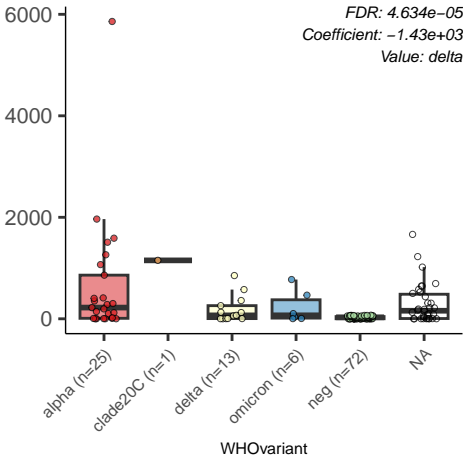

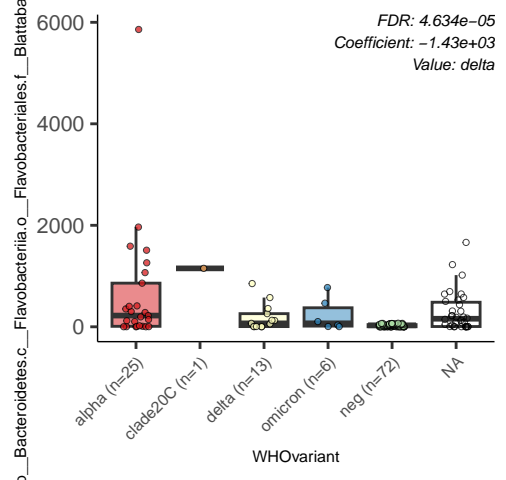

d\_Bacteria.p\_Armatimonadetes.c\_Fimbrimonad

FDR:  $4.726e-05$   
Coefficient:  $-1.62e+02$   
Value: neg

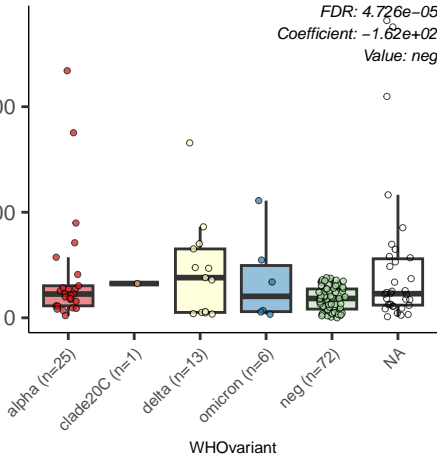

FDR: 4.726e-05

Coefficient:  $-1.62 \times 10^2$

Value: neg

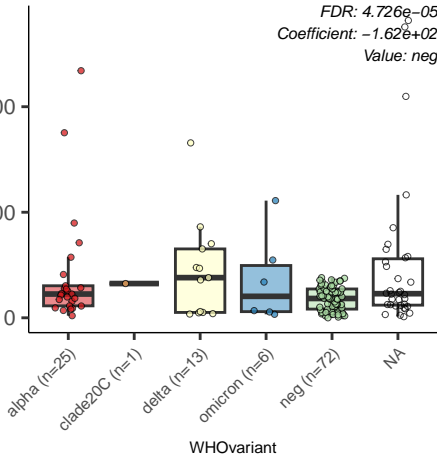



acteria.p\_\_Armatimonadetes.c\_\_Fimbriimonadia.o\_\_Fimbriimonadale

FDR:  $4.726e-05$   
Coefficient:  $-1.62e+02$   
Value: neg

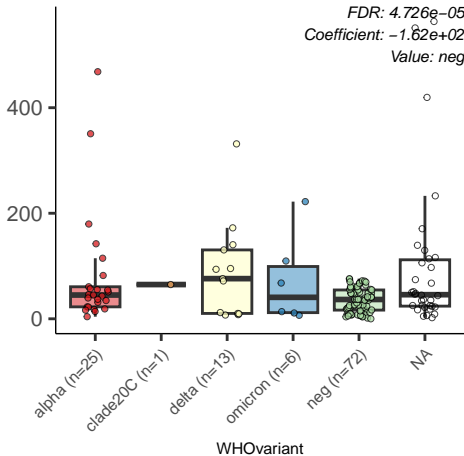

Armatimonadetes.c\_\_Fimbrimonadia.o\_\_Fimbrimonadales.f\_\_Fim

FDR: 4.726e-05  
Coefficient: -1.62e+02  
Value: neg

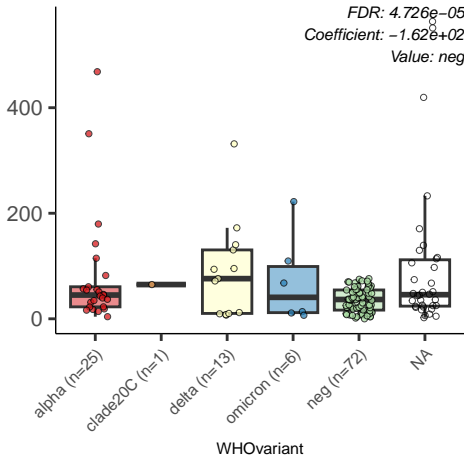

tes.c\_\_Fimbrimonadia.o\_\_Fimbrimonadales.f\_\_Fimbrimonadaceae

FDR:  $4.726e-05$   
Coefficient:  $-1.62e+02$   
Value: neg

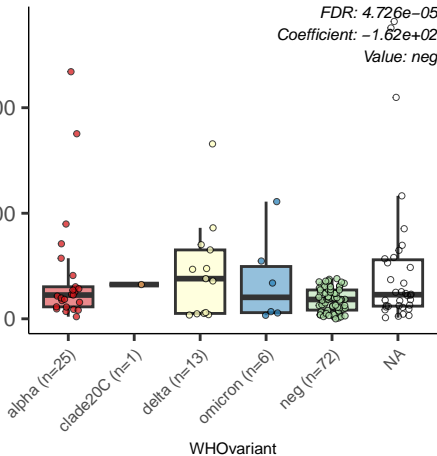

FDR:  $4.748e-05$   
Coefficient:  $-4.58e+02$   
Value: neg

1000

500

0

alpha (n=25)

clade20C (n=1)

delta (n=13)

omicron (n=6)

neg (n=72)

NA

WHOvariant

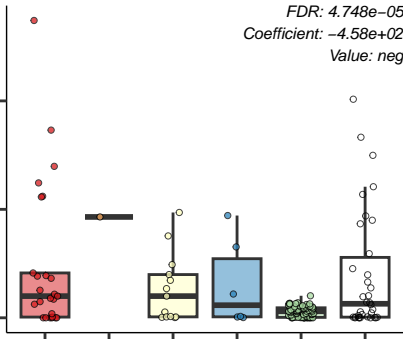

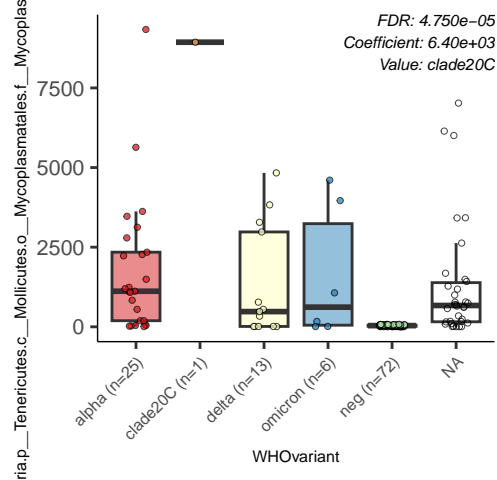

es.c\_Bacilli.o\_Lactobacillales.f\_Streptococcaceae.g\_Streptococcus

FDR:  $4.791 \times 10^{-5}$   
Coefficient:  $-1.84 \times 10^4$   
Value: neg

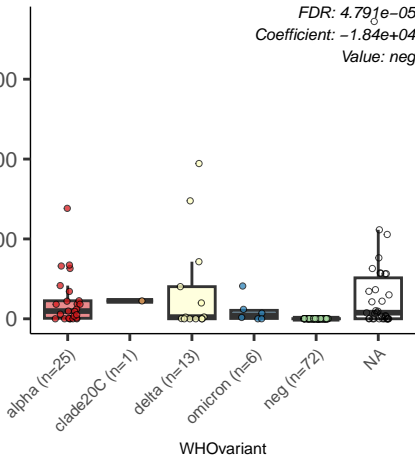

o\_Firmicutes.c\_\_Bacilli.o\_\_Bacillales.f\_\_Bacillaceae.g\_\_Geobacillu

FDR:  $4.804e-05$   
Coefficient:  $-2.79e+02$   
Value: neg

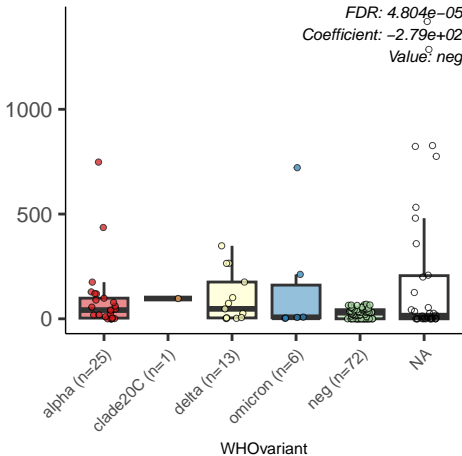

micutes.c\_\_Clostridia.o\_\_Eubacteriales.f\_\_Oscillospiraceae.g\_\_Ru

FDR:  $4.824e-05$   
Coefficient:  $-8.05e+02$   
Value: delta

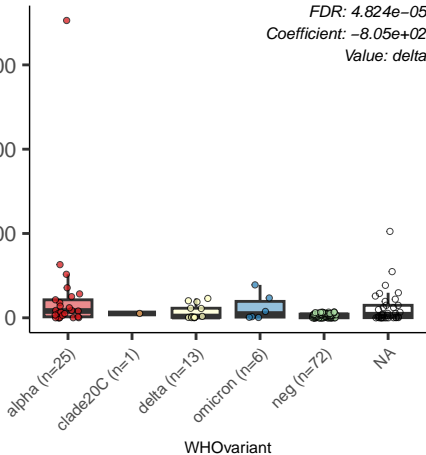



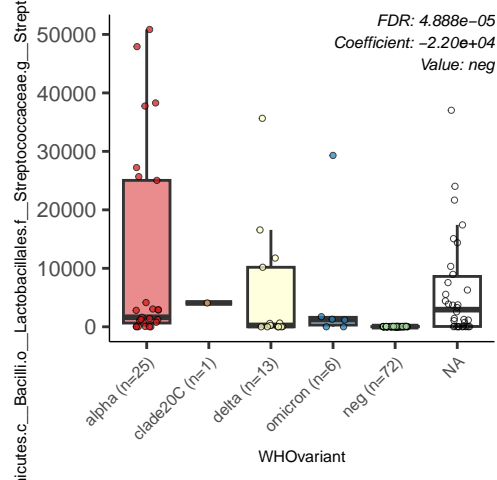

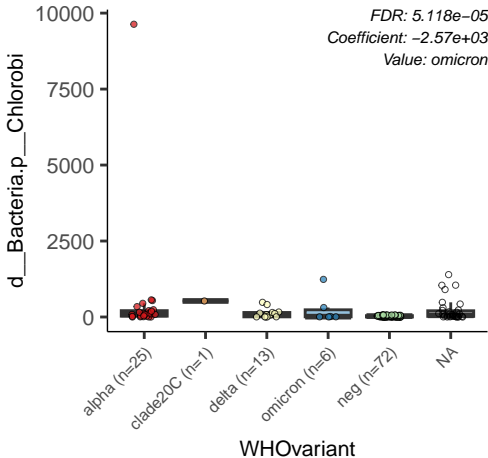

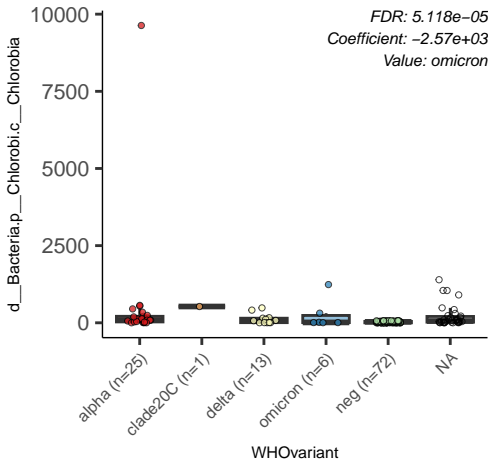

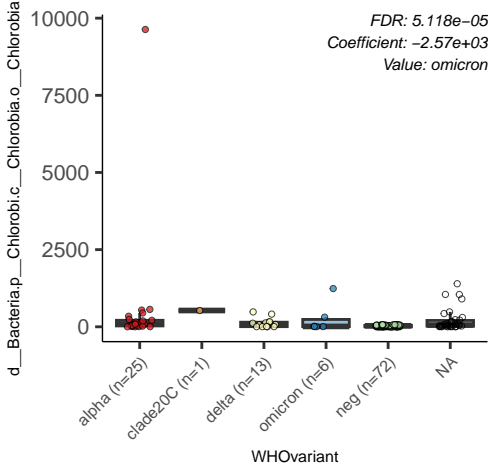

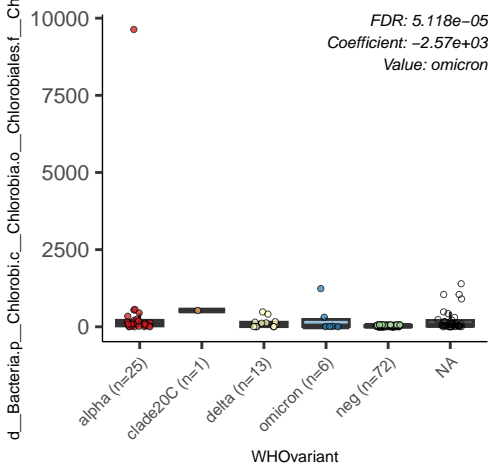

tertia.p\_\_Chloroflexi.c\_\_Anaerolineae.o\_\_Anaerolineales.f\_\_Anaero

*FDR: 5.130e-05*  
*Coefficient: -7.58e+02*  
*Value: neg*

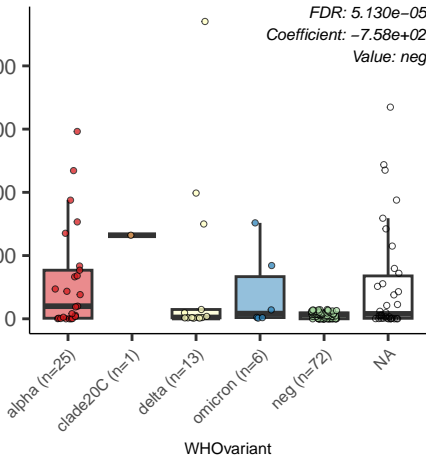

oflexi.c\_Anaerolineae.o\_Anaerolineales.f\_Anaerolineaceae.g\_A

FDR:  $5.130e-05$   
Coefficient:  $-7.58e+02$   
Value: neg

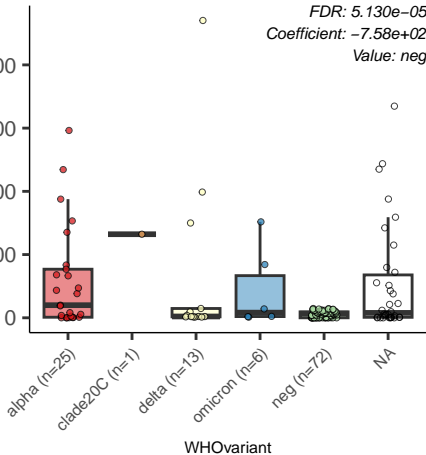

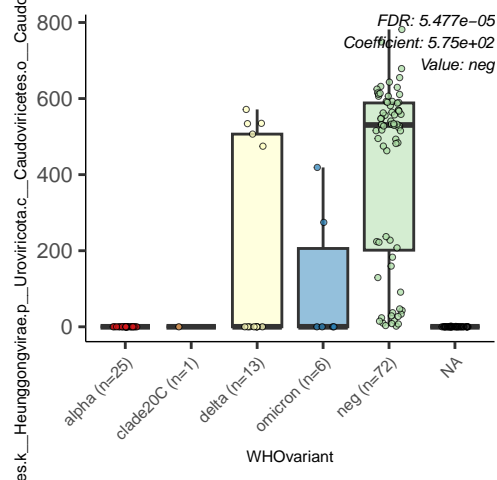



bacteria.p\_\_Firmicutes.c\_\_Clostridia.o\_\_Eubacteriales.f\_\_Clostridia

*FDR: 5.563e-05*  
*Coefficient: -7.89e+02*  
*Value: neg*

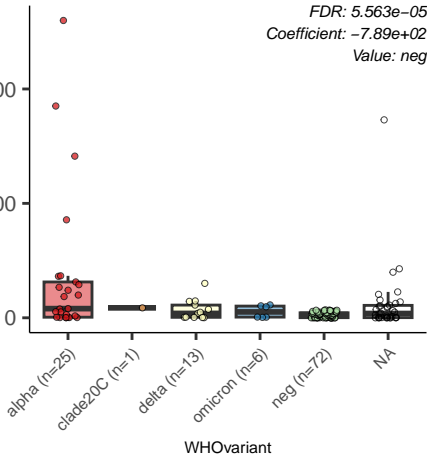

nicutes.c\_\_Clostridia.o\_\_Eubacteriales.f\_\_Clostridiaceae.g\_\_Serper

*FDR: 5.563e-05*  
*Coefficient: -7.89e+02*  
*Value: neg*

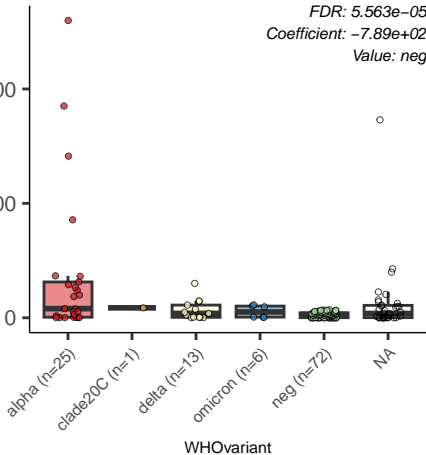

eroidetes.c\_\_Bacteroidia.o\_\_Bacteroidales.f\_\_Prevotellaceae.g\_\_P

*FDR:  $5.577e-05$*   
*Coefficient:  $-3.75e+05$*   
*Value: neg*

1e+06

5e+05

0e+00

alpha (n=25)

clade20C (n=1)

delta (n=13)

omicron (n=6)

neg (n=72)

NA

WHOvariant

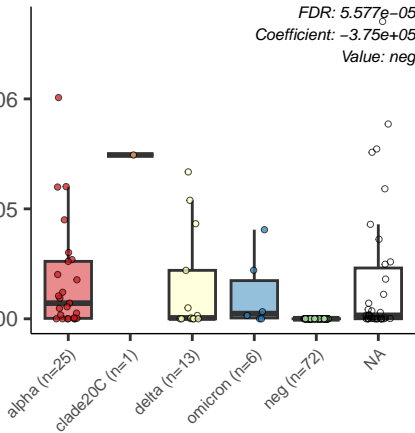

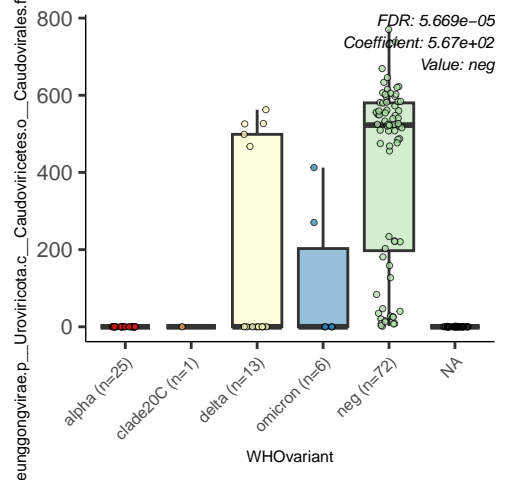

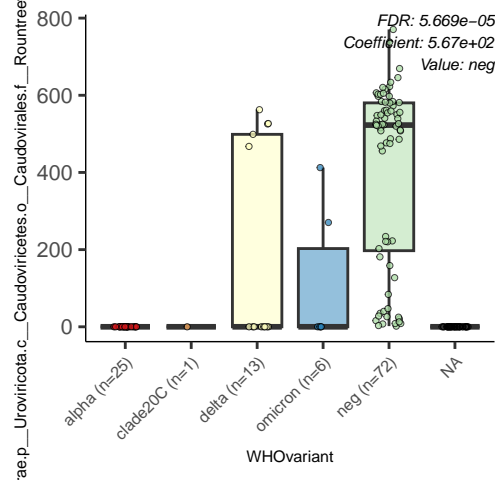

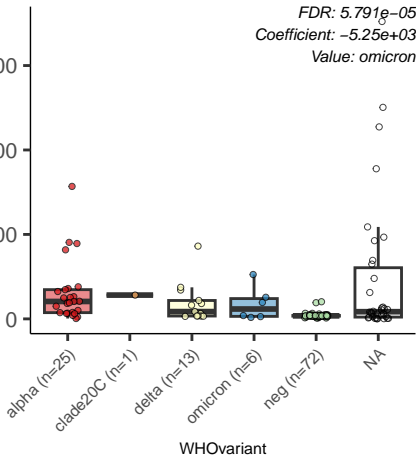

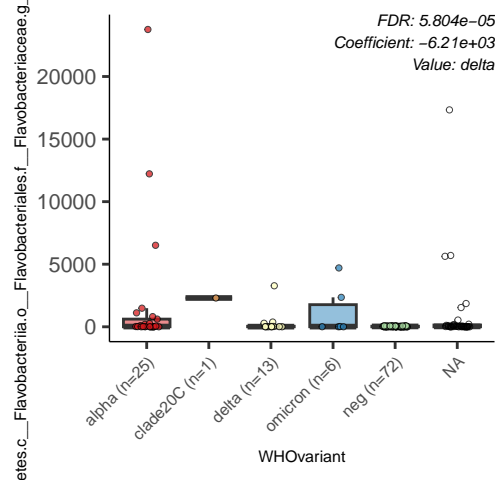

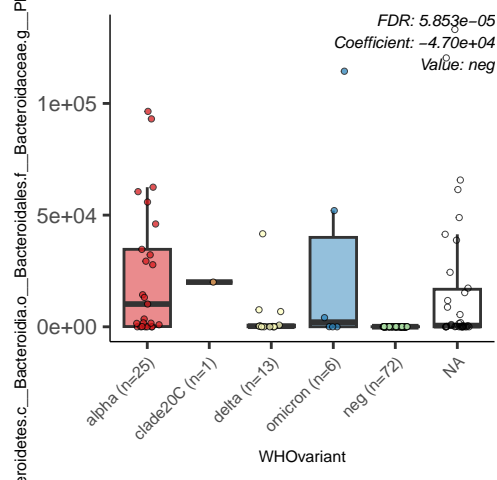



cteria.p\_\_Firmicutes.c\_\_Clostridia.o\_\_Eubacteriales.f\_\_Oscillospira

FDR:  $5.941e-05$   
Coefficient:  $-7.95e+02$   
Value: omicron

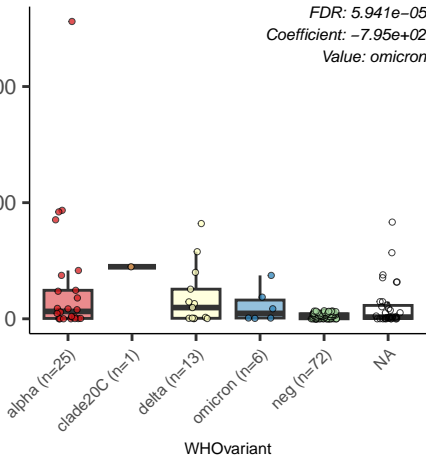

FDR: 5.941e-05  
Coefficient: -7.95e+02  
Value: omicron

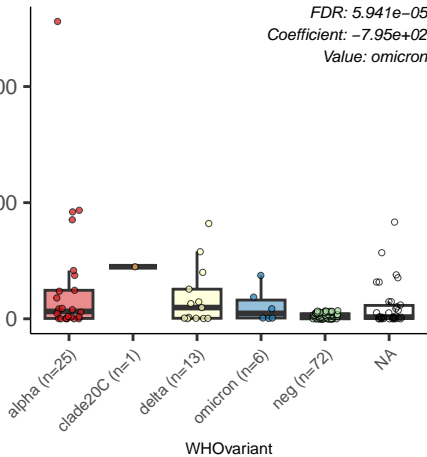

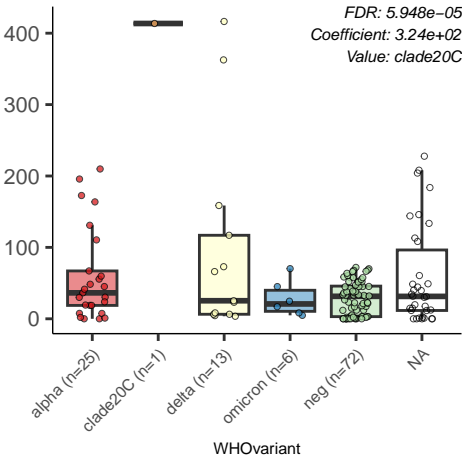



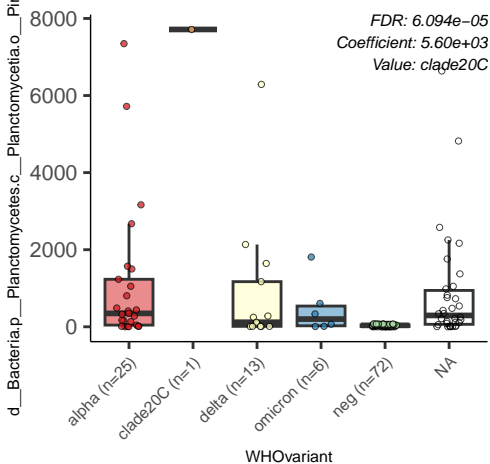



o\_Actinobacteria.c\_Actinomycetia.o\_Streptosporangiales.f\_No

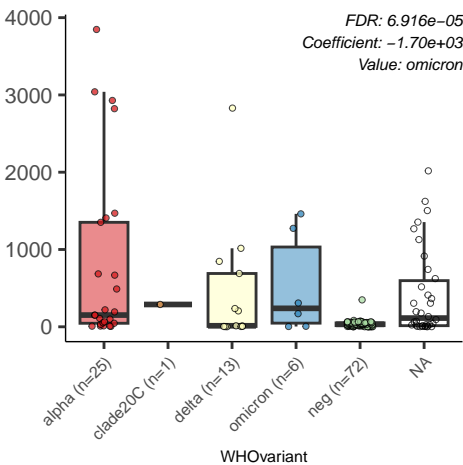

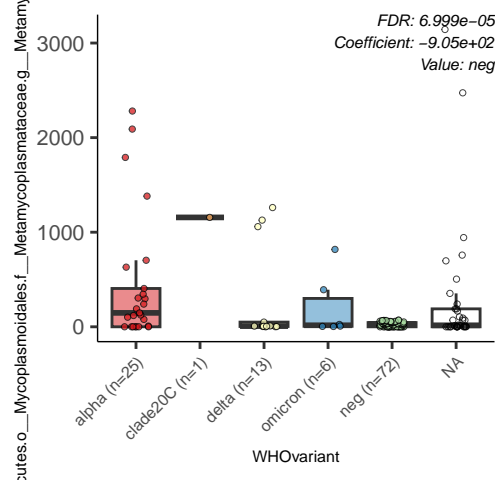



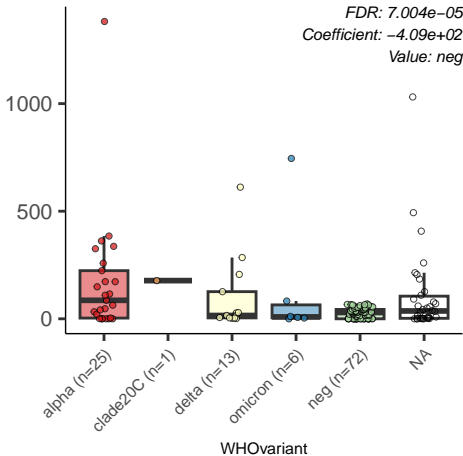

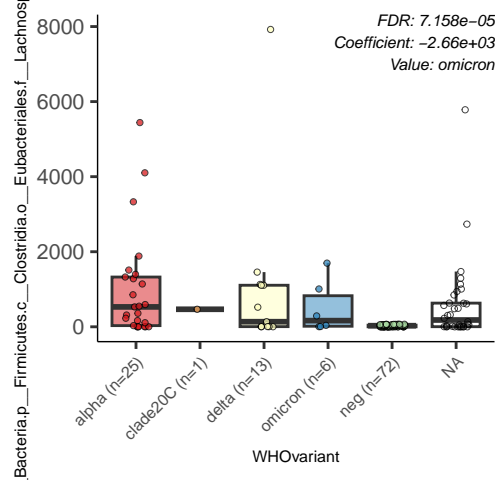

Firmicutes.c\_\_Clostridia.o\_\_Eubacteriales.f\_\_Lachnospiraceae.g

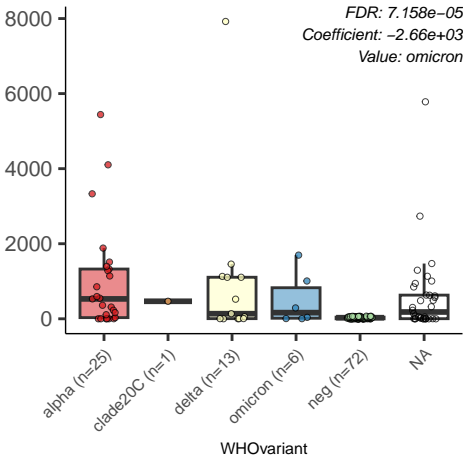

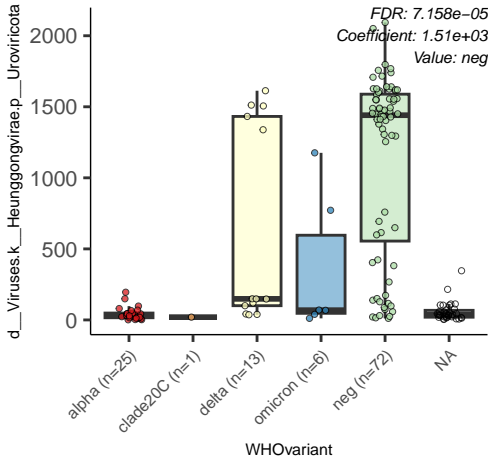

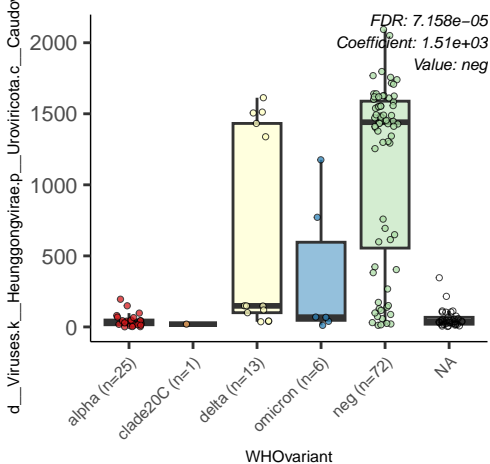

Firmicutes.c\_\_Clostridia.o\_\_Eubacteriales.f\_\_Eubacteriales.Family

FDR:  $7.178e-05$   
Coefficient:  $-9.23e+03$   
Value: neg

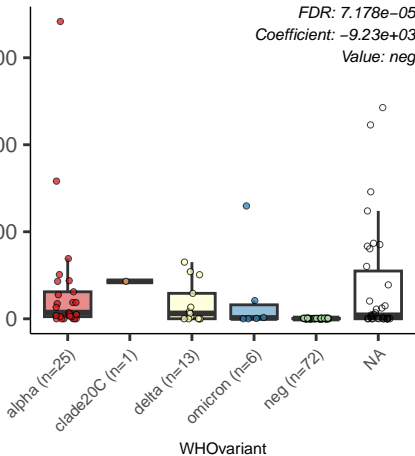

d\_\_Viruses.k\_\_Heunggongvirae

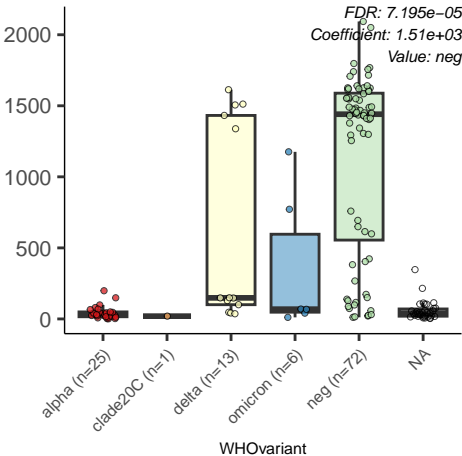

bacteria.c\_\_Fusobacteriia.o\_\_Fusobacteriales.f\_\_Leptotrichiaceae.g

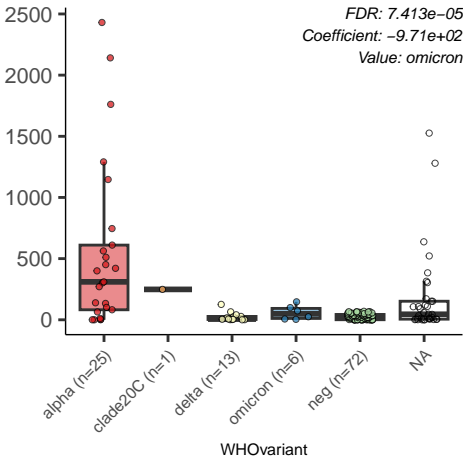



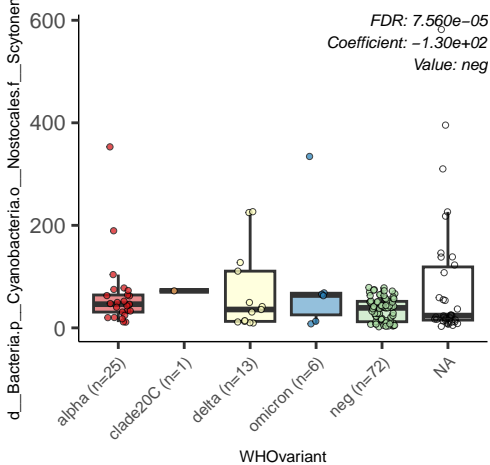

s.c\_Flavobacteriia.o\_Flavobacteriales.f\_Weeksellaceae.g\_Chry

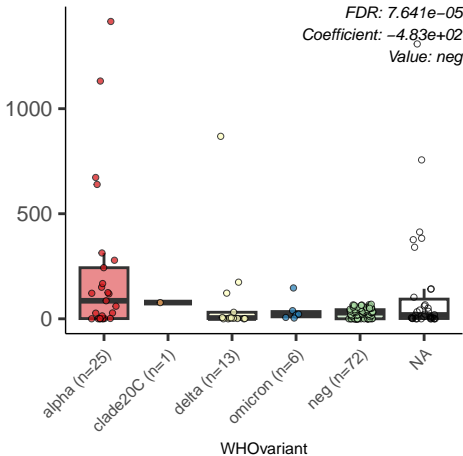

bacteria.c\_\_Actinomycetia.o\_\_Actinomycetales.f\_\_Actinomycetaceae

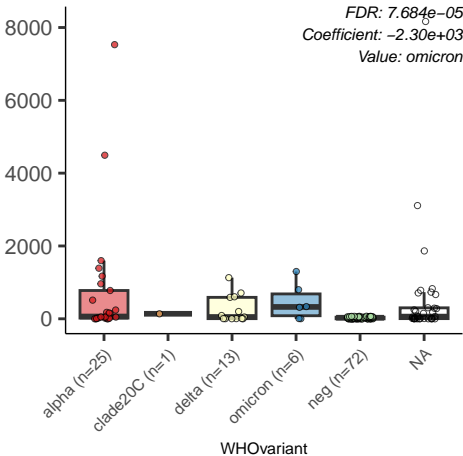

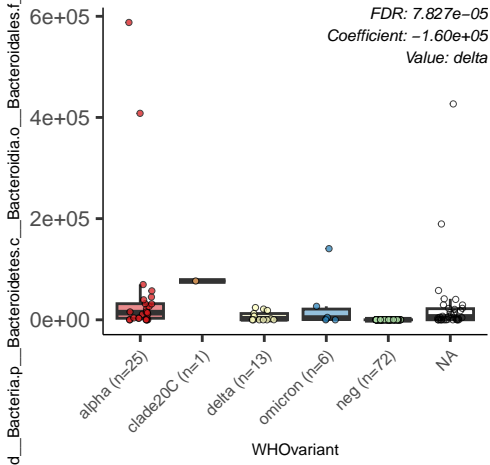

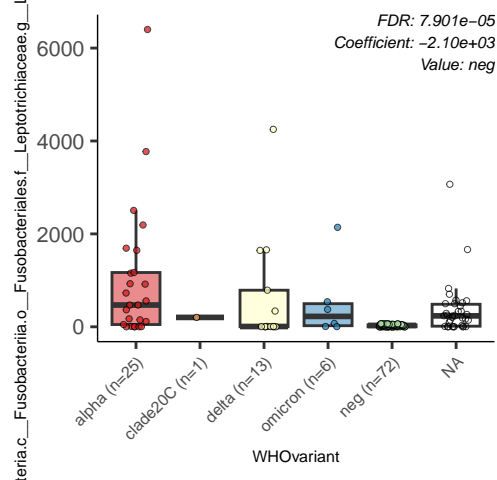

acteria.c\_\_Actinomycetia.o\_\_Streptosporangiales.f\_\_Nocardiopsaceae

FDR: 7.927e-05

Coefficient:  $-1.68e+03$

Value: omicron

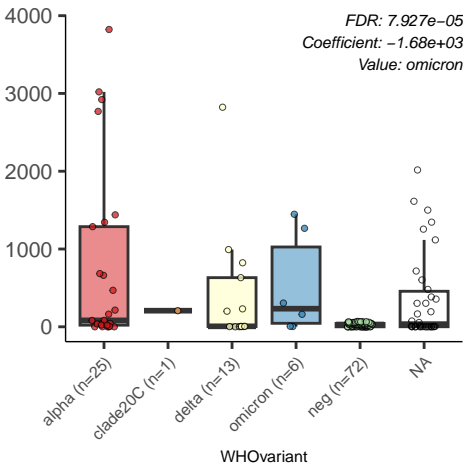

bacteria.p\_\_Firmicutes.c\_\_Clostridia.o\_\_Eubacteriales.f\_\_Lachnospir

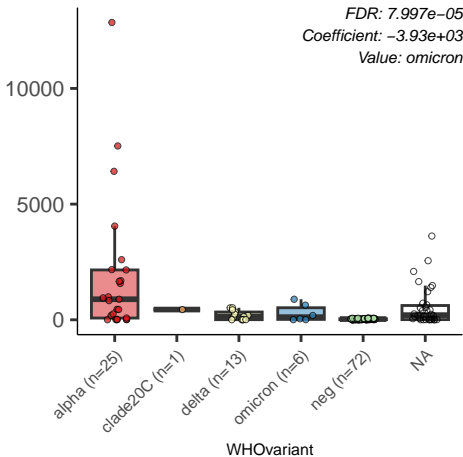

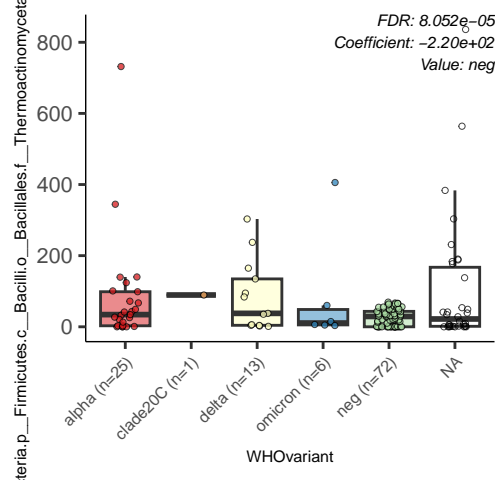



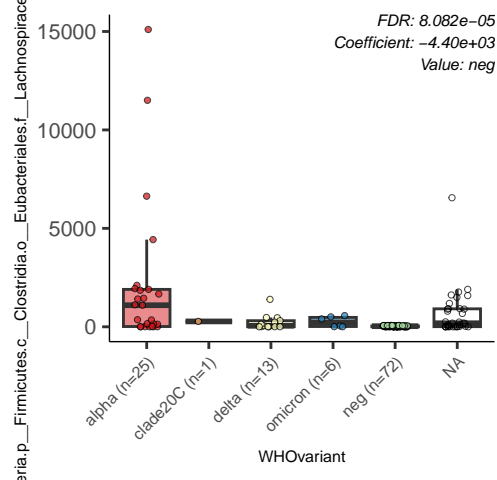

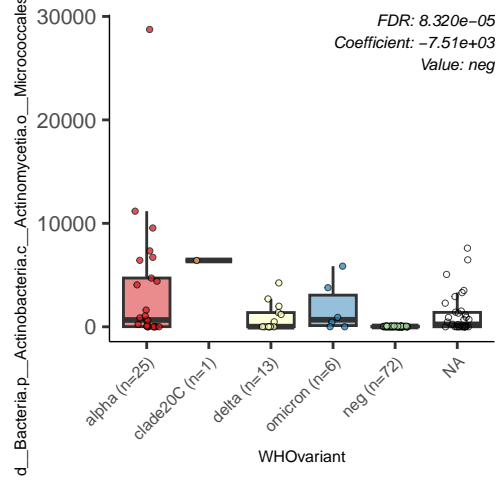

FDR:  $8.320e-05$   
Coefficient:  $-7.51e+03$   
Value: neg

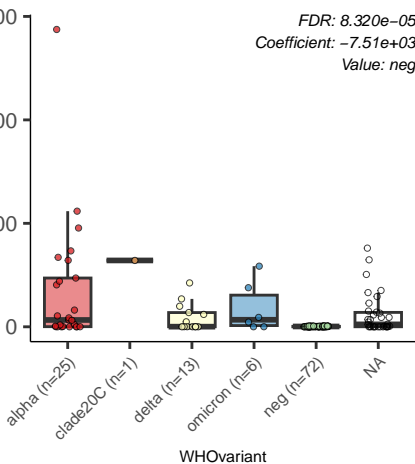

ctinobacteria.c\_\_Actinomycetia.o\_\_Micrococcales.f\_\_Jonesiaceae.g

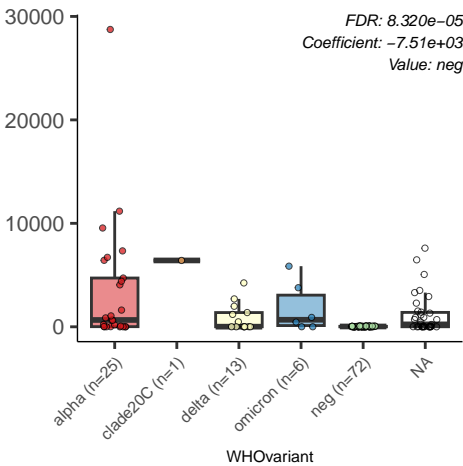

d\_Bacteria.p\_Actinobacteria.c\_Actinomycetia.o\_Candidatus.N

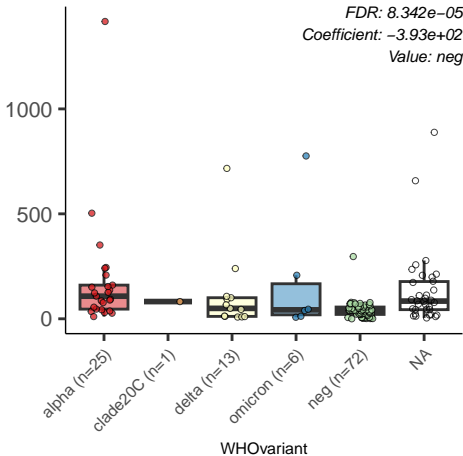

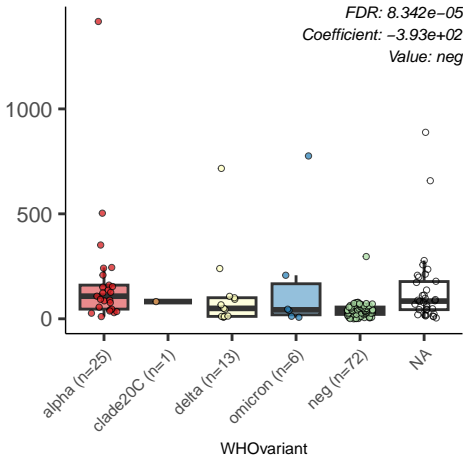

ericutes.c\_Mollicutes.o\_Mycoplasmales.f\_Mycoplasmataceae.

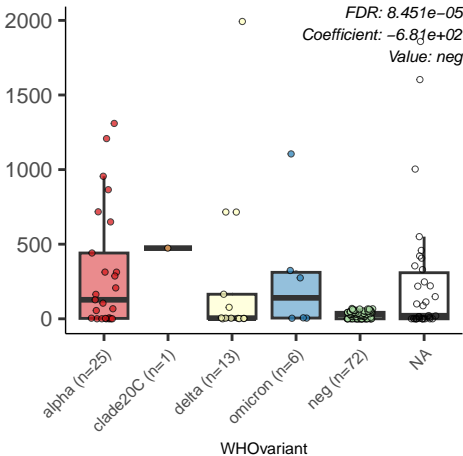

d\_\_Bacteria.p\_\_Proteobacteria.c\_\_Gammaproteobacteria.o\_\_

FDR:  $8.526e-05$   
Coefficient:  $-1.95e+03$   
Value: neg

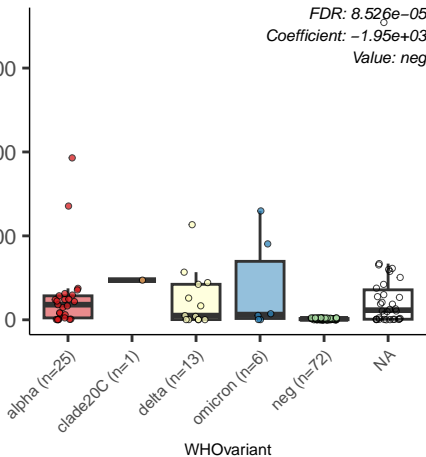



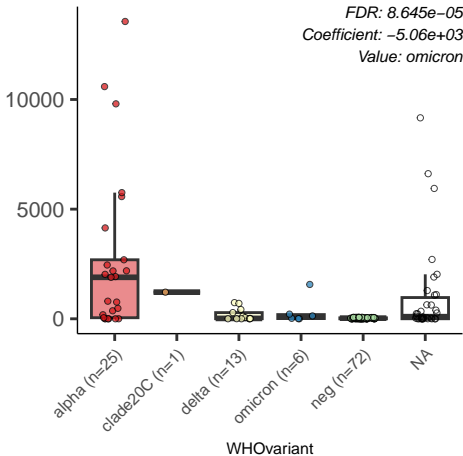

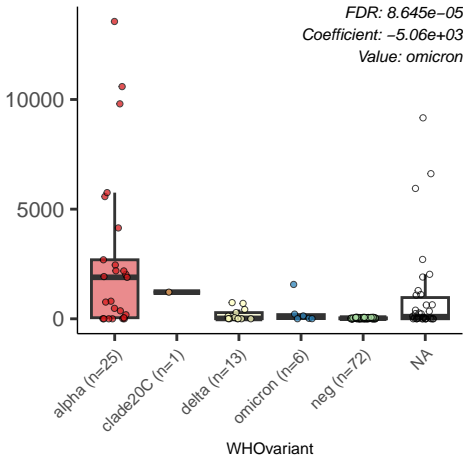

teria.p\_\_Firmicutes.c\_\_Clostridia.o\_\_Eubacteriales.f\_\_Peptococcae

FDR:  $8.803e-05$   
Coefficient:  $-1.35e+03$   
Value: neg

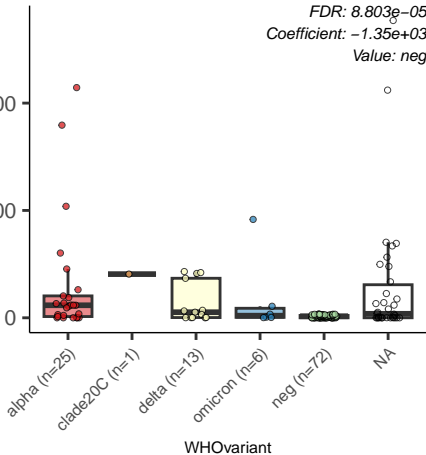

c\_\_Clostridia.o\_\_Eubacteriales.f\_\_Peptococcaceae.g\_\_Dehalobact

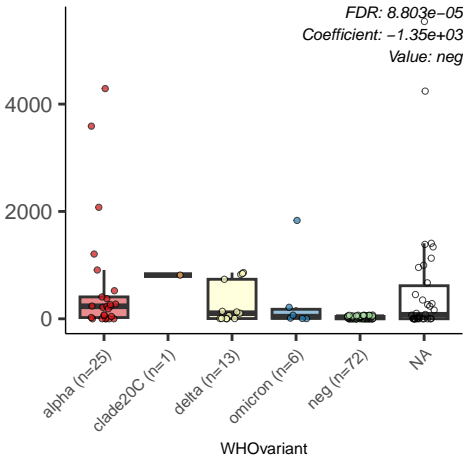

*FDR: 8.803e-05*

**Coefficient:**  $-1.35e+03$

Value: neg

teria.p\_\_Bacteroidetes.c\_\_Bacteroidia.o\_\_Bacteroidales.f\_\_Barnes

FDR:  $8.880e-05$   
Coefficient:  $-2.29e+04$   
Value: neg

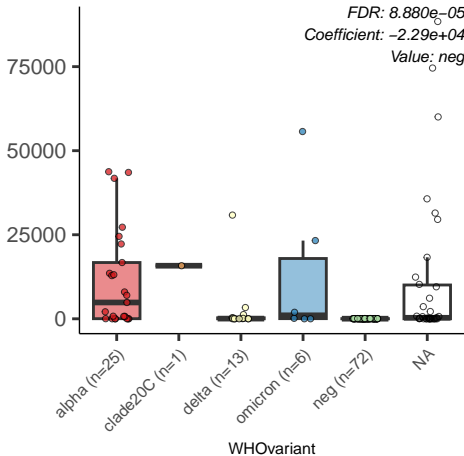

eroidetes.c\_\_Bacteroidia.o\_\_Bacteroidales.f\_\_Barnesiellaceae.g\_\_

FDR:  $8.880e-05$   
Coefficient:  $-2.29e+04$   
Value: neg

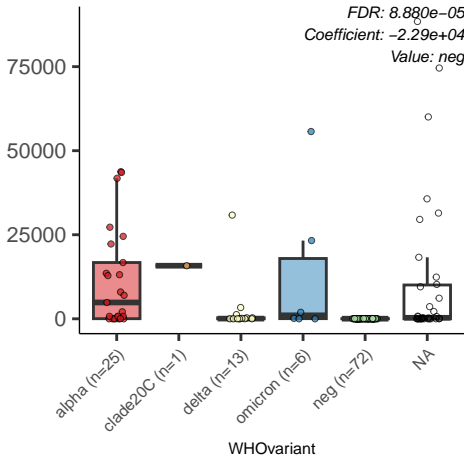

ia.p\_Actinobacteria.c\_Actinomycetia.o\_Actinomycetales.f\_Acti

*FDR: 8.888e-05*  
*Coefficient: -7.38e+05*  
*Value: neg*

2e+06

1e+06

0e+00

alpha (n=25)

clade20C (n=1)

delta (n=13)

omicron (n=6)

neg (n=72)

NA

WHOvariant

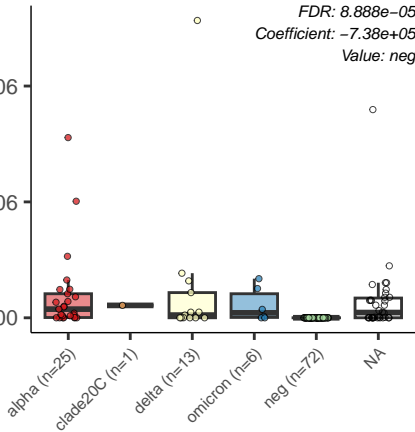

monadia.o\_\_ Candidatus.Nanosynbacterales.f\_\_ Candidatus.Nanosy

*FDR: 8.964e-05*  
*Coefficient: -2.43e+02*  
*Value: neg*

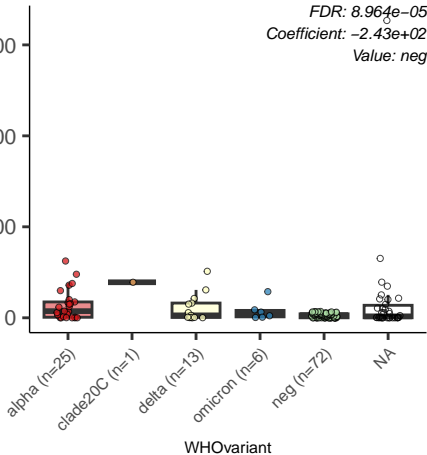



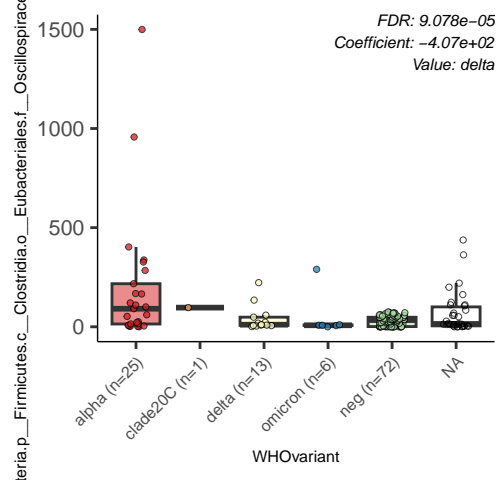

s.c.\_Clostridia.o\_Eubacteriales.f\_Oscillospiraceae.g\_Ruthenib

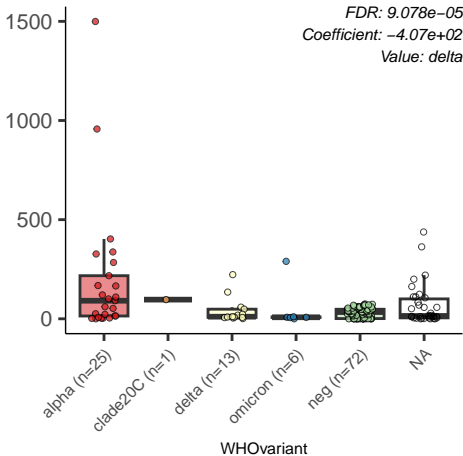

d\_\_Bacteria.p\_\_Verrucomicrobia.c\_\_Verrucomicrobia

FDR:  $9.356e-05$   
Coefficient:  $-8.90e+02$   
Value: omicron

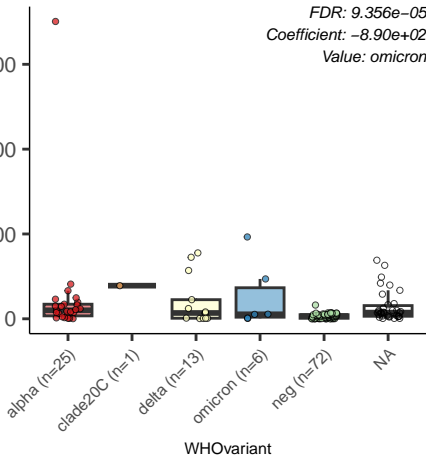



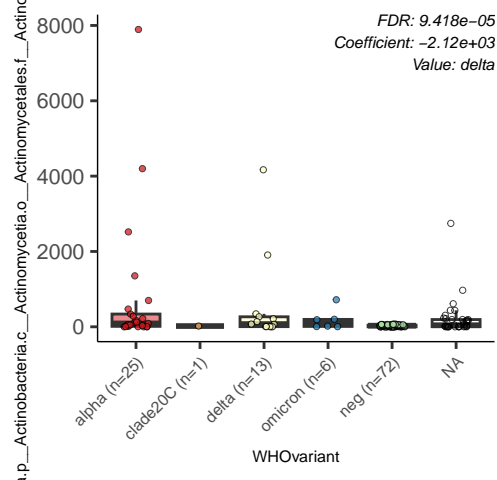

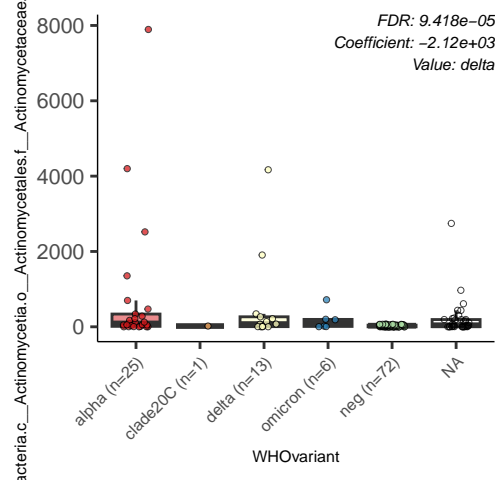

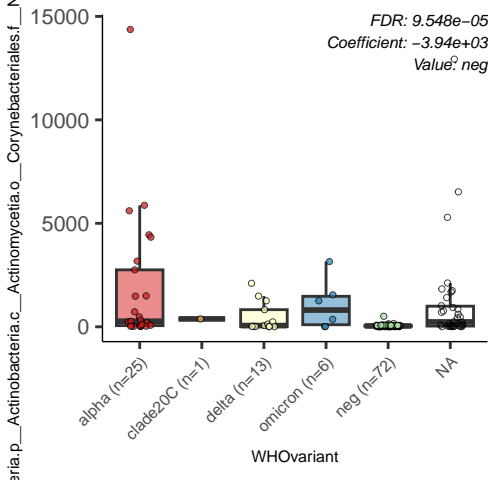

eria.p\_\_Bacteroidetes.c\_\_Flavobacteriia.o\_\_Flavobacteriales.f\_\_We

FDR:  $9.668e-05$   
Coefficient:  $-2.43e+03$   
Value: neg

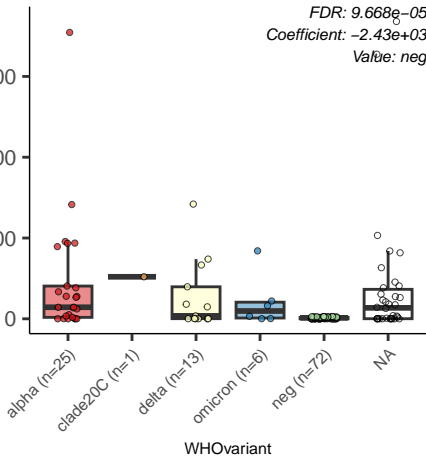



d\_\_Bacteria.p\_\_Cyanobacteria.o\_\_Pseudanabaena

FDR:  $9.802e-05$   
Coefficient:  $-2.94e+03$   
Value: delta

10000

5000

alpha (n=25)

clade20C (n=1)

delta (n=13)

omicron (n=6)

neg (n=72)

NA

WHOvariant

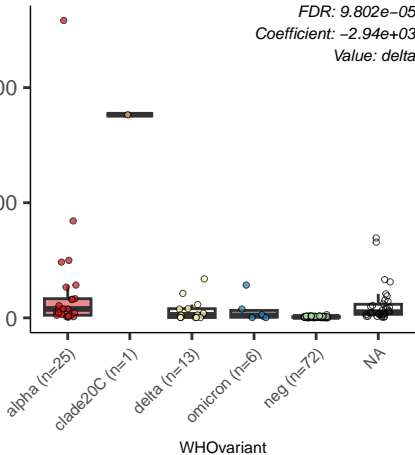

Actinomycetia.o\_Pseudonocardiales.f\_Pseudonocardaceae.g

FDR:  $9.822e-05$   
Coefficient:  $-3.91e+03$   
Value: delta

10000

5000

0

alpha (n=25)

clade20C (n=1)

delta (n=13)

omicron (n=6)

neg (n=72)

NA

WHOvariant

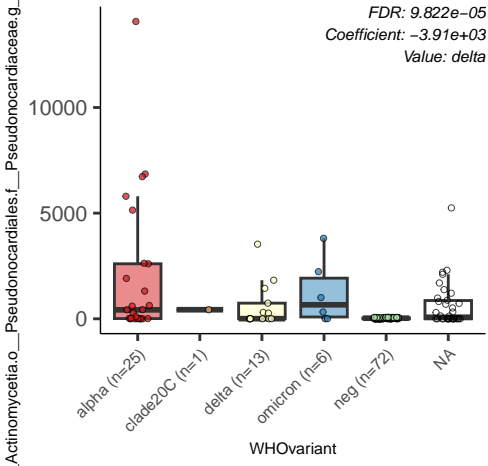

ia.p\_\_Proteobacteria.c\_\_Gammaproteobacteria.o\_\_Xanthomonada

FDR:  $9.925e-05$   
Coefficient:  $-1.38e+02$   
Value: neg

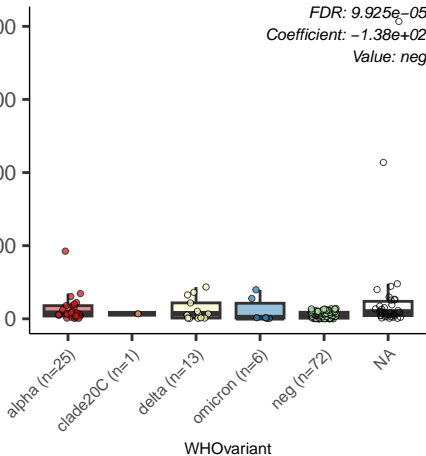

Actinobacteria.c\_Actinomycetia.o\_Actinomycetales.f\_Actinom

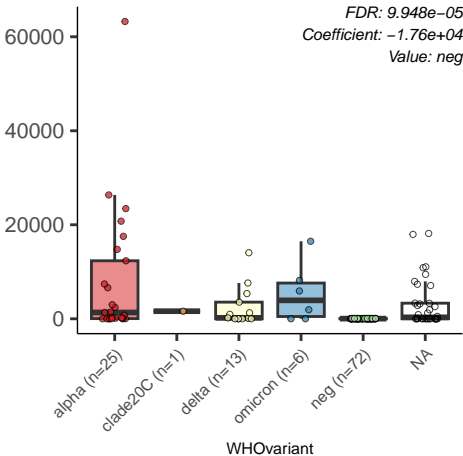

s.c.\_Clostridia.o\_\_Eubacteriales.f\_\_Eubacteriales.Family.XIII..Incert

FDR:  $9.948e-05$   
Coefficient:  $-2.10e+03$   
Value: neg

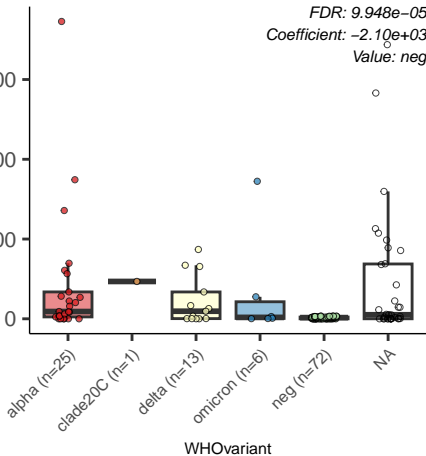

d\_Bacteria.p\_\_Acidobacteria

FDR:  $9.963e-05$   
Coefficient:  $-1.95e+03$   
Value: omicron

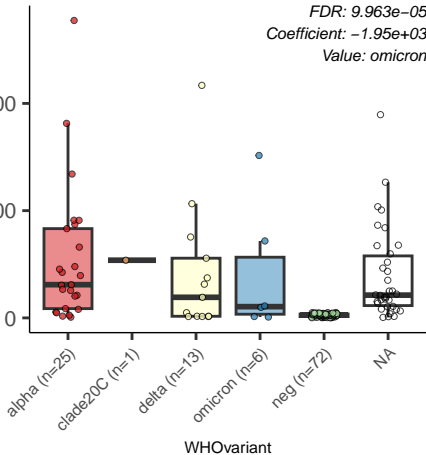

acteroidetes.c\_\_Spingobacteriia.o\_\_Spingobacteriales.f\_\_Spingob

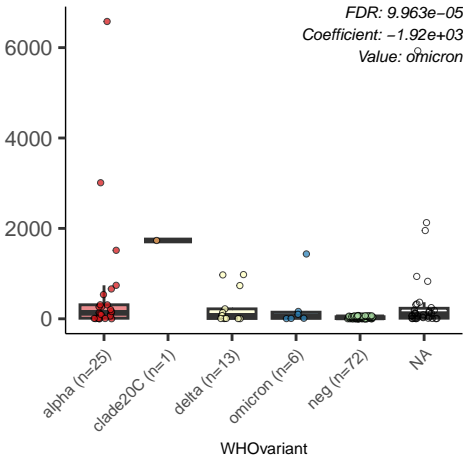

ria.c Fusobacteriia.o Fusobacteriales.f Leptotrichiaceae.g Le

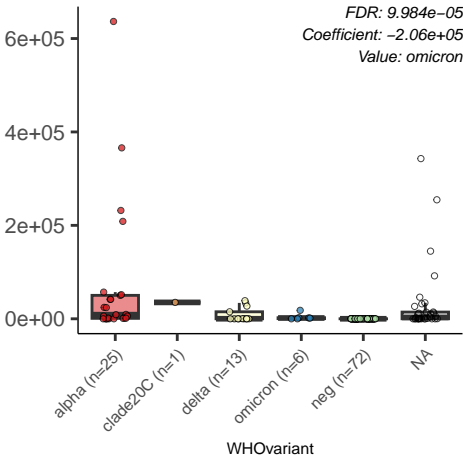



FDR:  $1.002e-04$   
Coefficient:  $-2.05e+03$   
Value: delta

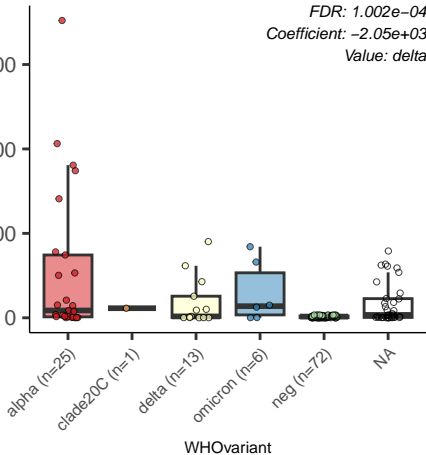

eria.c\_Actinomycetia.o\_Micrococcales.f\_Micrococcaceae.g\_Au

FDR: 1.002e-04  
Coefficient: -2.05e+03  
Value: delta

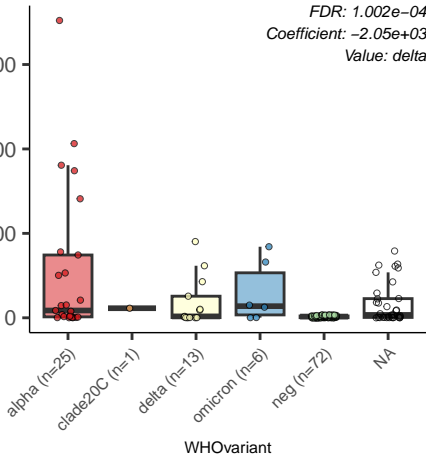

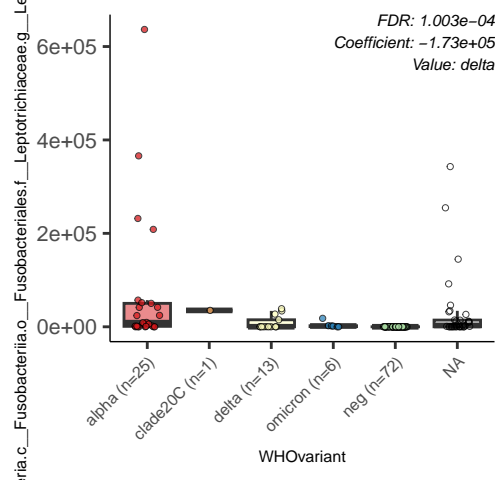

d\_\_Bacteria.p\_\_Bacteroidetes.o\_\_Candidatus.Sulfidibac

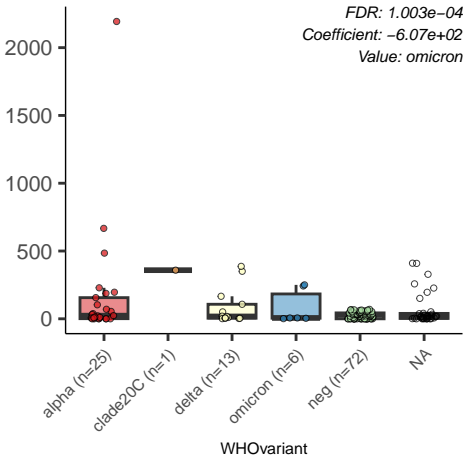

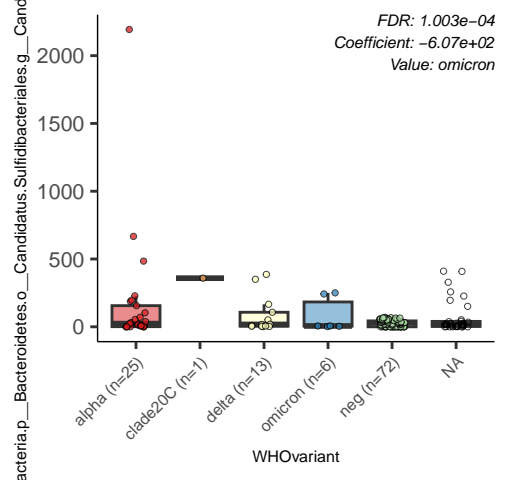

s.o\_\_\_Candidatus.Sulfidibacteriales.g\_\_\_Candidatus.Sulfidibacterium.

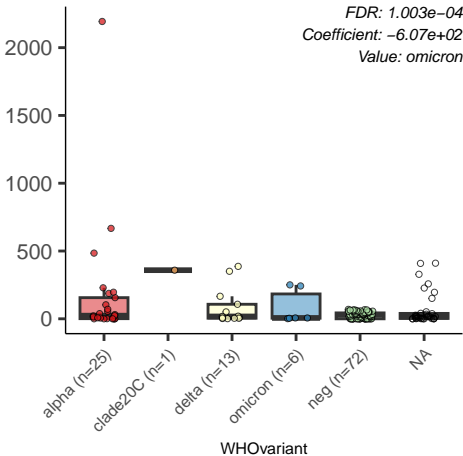

Candidatus.Saccharibacteria.c\_\_Candidatus.Saccharimonadia.o

FDR:  $1.025e-04$   
Coefficient:  $-8.57e+03$   
Value: neg

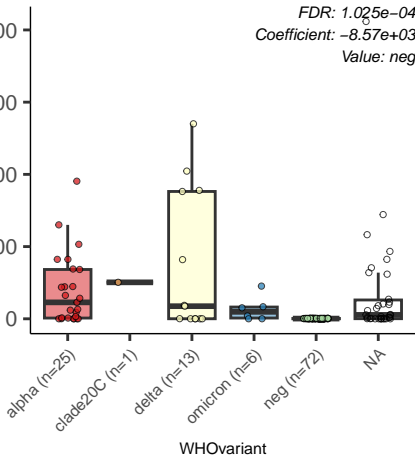

naribacteria.c\_\_Candidatus.Saccharimonadia.o\_\_Candidatus.Sacch

FDR:  $1.025e-04$   
Coefficient:  $-8.57e+03$   
Value: neg

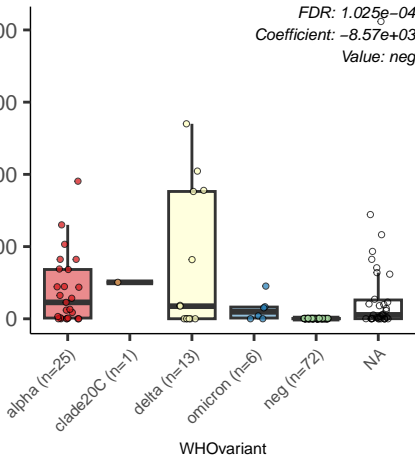



Candidatus.Saccharimonadia.o\_\_Candidatus.Saccharimonadales.f

FDR:  $1.025e-04$   
Coefficient:  $-8.57e+03$   
Value: neg

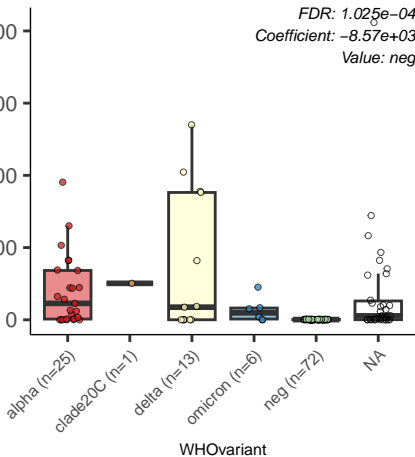

onadia.o\_\_Candidate.Saccharimonadales.f\_\_Candidate.Sacchari

FDR:  $1.025e-04$   
Coefficient:  $-8.57e+03$   
Value: neg

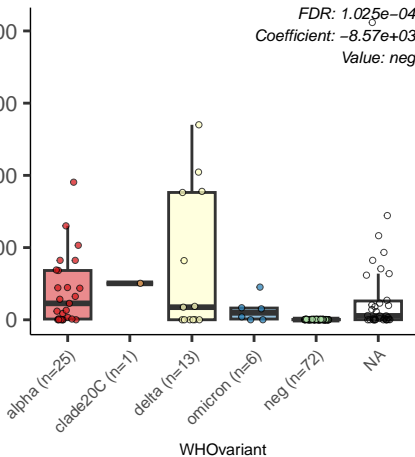

FDR:  $1.033e-04$   
Coefficient:  $-3.39e+02$   
Value: neg

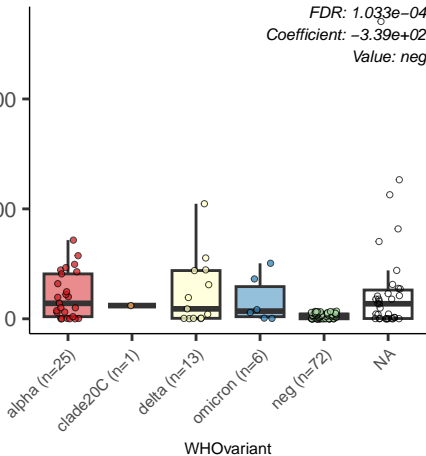

a.c\_\_Actinomycetia.o\_\_Candidatus.Nanopelagiales.f\_\_Candidatus

FDR:  $1.038e-04$   
Coefficient:  $-3.75e+02$   
Value: neg

1000

500

alpha (n=25)

clade20C (n=1)

delta (n=13)

omicron (n=6)

neg (n=72)

NA

WHOvariant

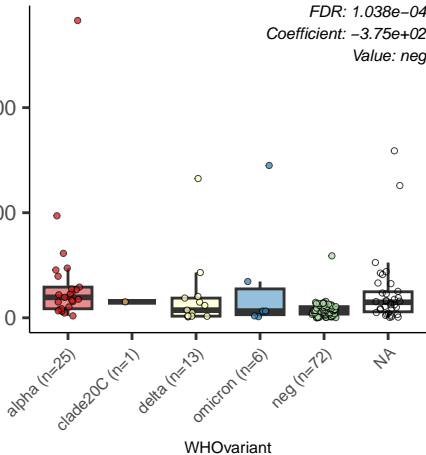

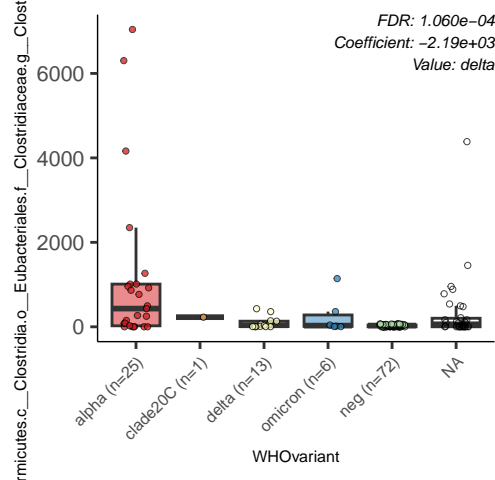

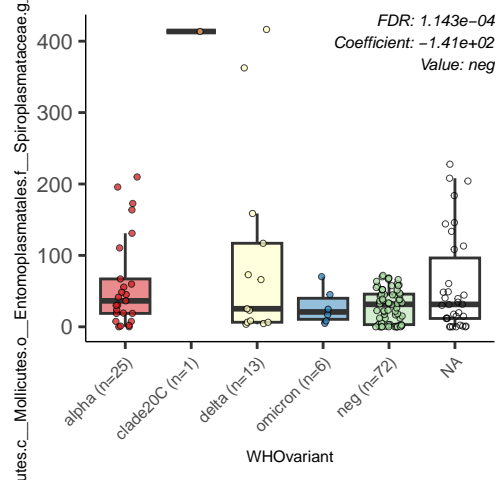

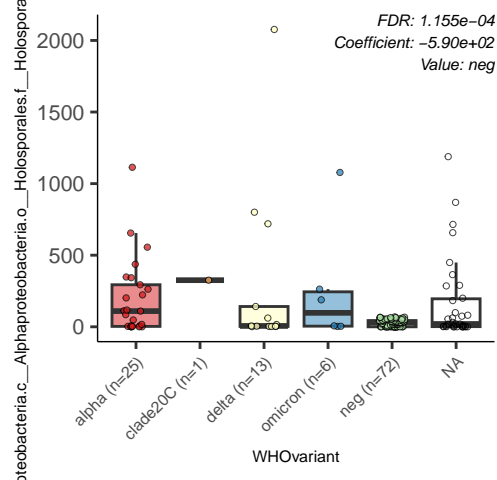

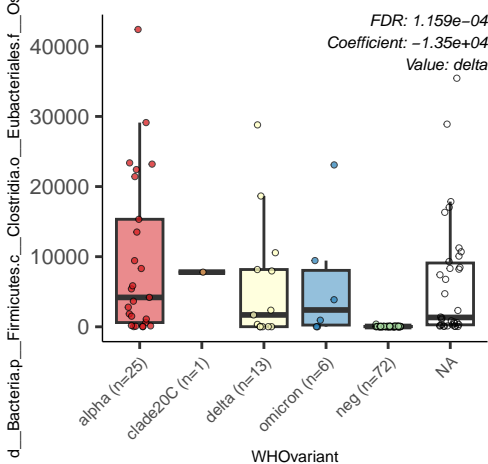



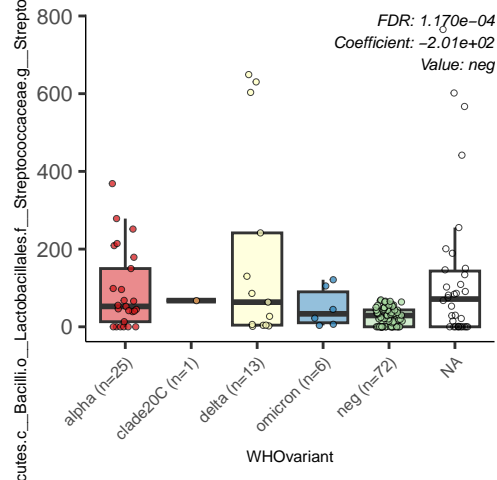

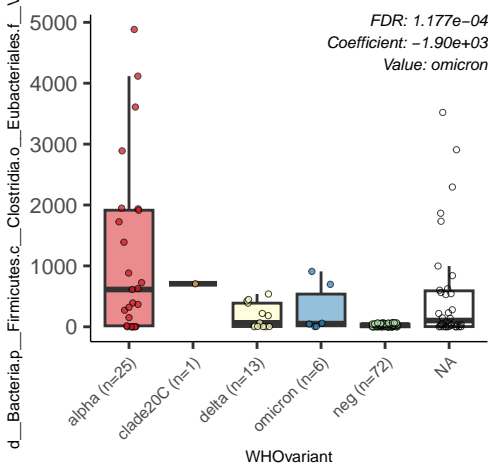

Proteobacteria.c\_\_Betaproteobacteria.o\_\_Burkholderiales.f\_\_Co

FDR:  $1.182e-04$   
Coefficient:  $-1.41e+02$   
Value: omicron

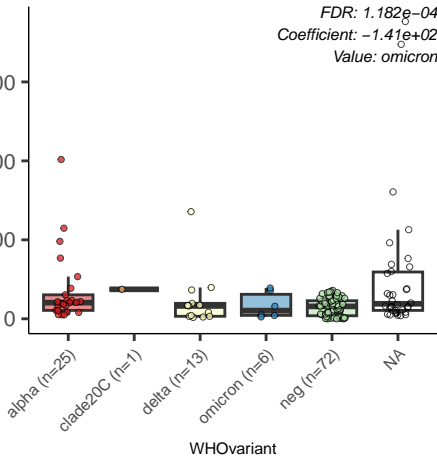

Bacteria.p\_Firmicutes.c\_Clostridia.o\_Eubacteriales.f\_Eubacteri

FDR:  $1.208e-04$   
Coefficient:  $-4.45e+02$   
Value: neg

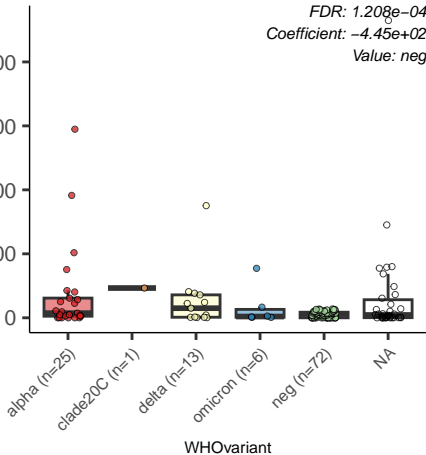

irmicutes.c\_\_Clostridia.o\_\_Eubacteriales.f\_\_Eubacteriaceae.g\_\_Alk

FDR:  $1.208e-04$   
Coefficient:  $-4.45e+02$   
Value: neg

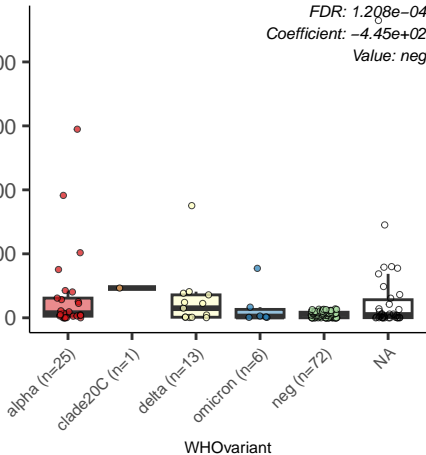

ria.c\_\_Actinomycetia.o\_\_Propionibacteriales.f\_\_Propionibacteriaceae

FDR:  $1.209 \times 10^{-4}$   
Coefficient:  $-2.47 \times 10^2$   
Value: omicron

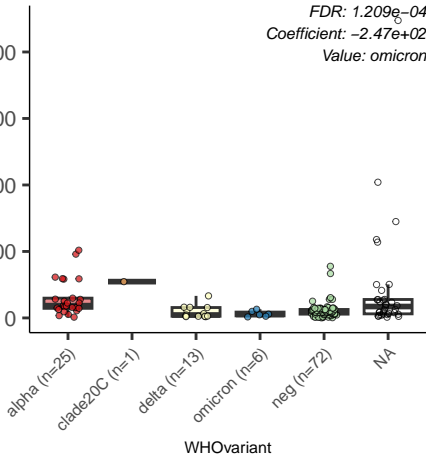

d\_Bacteria.p\_\_Candidatus.Omnitrophica

FDR: 1.233e-04  
Coefficient: -1.16e+03  
Value: neg

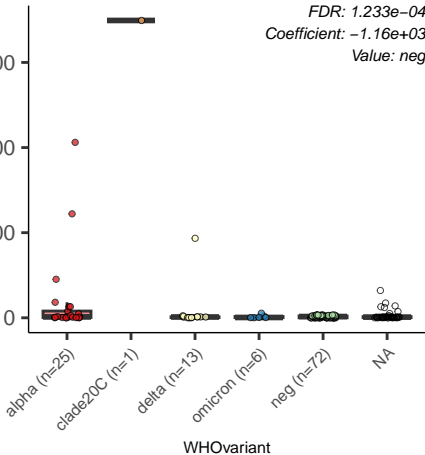

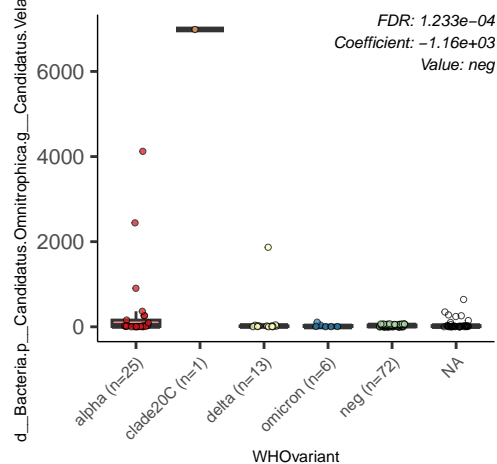



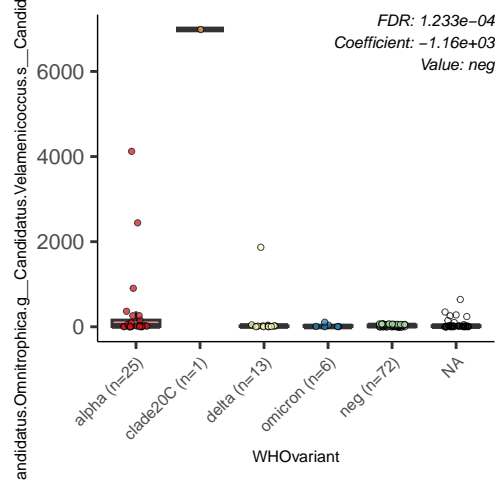

c\_\_Gammaproteobacteria.o\_\_Oceanospirillales.f\_\_Halomonadaceae

FDR:  $1.247e-04$   
Coefficient:  $-1.55e+04$   
Value: delta

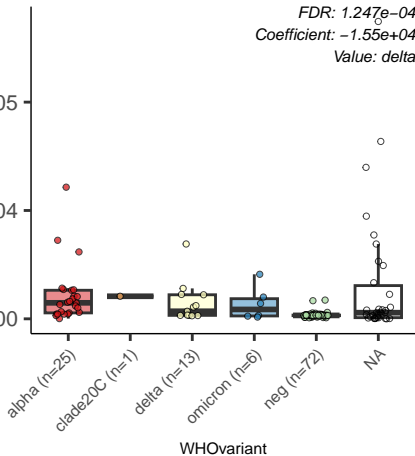

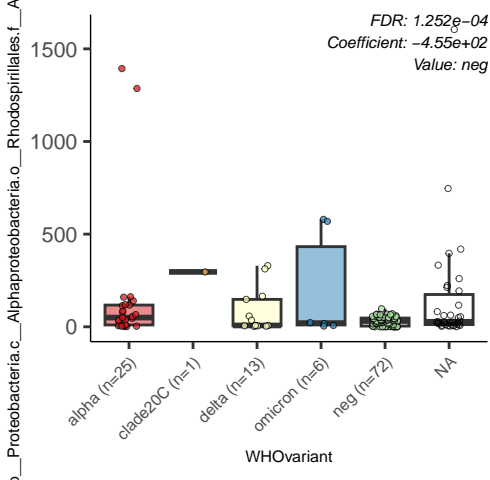

d\_Bacteria.p\_Firmicutes.c\_Bacilli.o\_Bacillales.f\_Bacillaceae.g

FDR:  $1.252e-04$   
Coefficient:  $-8.66e+01$   
Value: neg

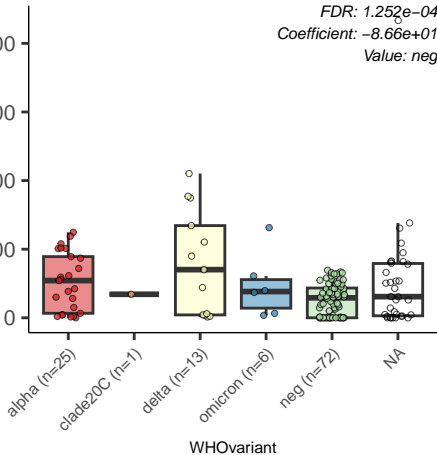

ria.p\_\_Proteobacteria.c\_\_Alphaproteobacteria.o\_\_Hyphomicrobiale

FDR:  $1.261e-04$   
Coefficient:  $-3.39e+02$   
Value: delta

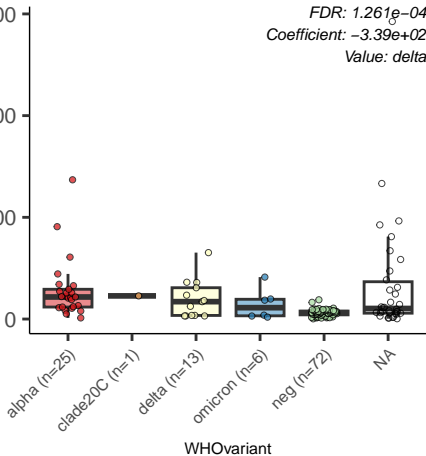

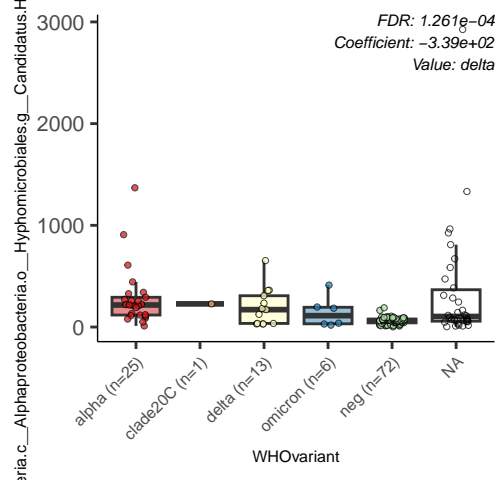

bacteria.c\_Actinomycetia.o\_Corynebacteriales.f\_Nocardiaceae.g

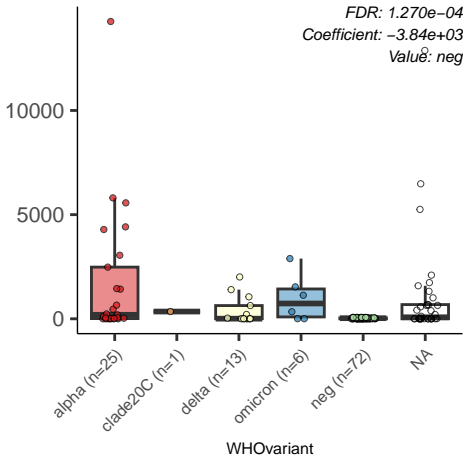

a.p.\_Firmicutes.c.\_Clostridia.o.\_Eubacteriales.f.\_Desulfitobacteri

FDR:  $1.286e-04$   
Coefficient:  $-4.32e+02$   
Value: delta

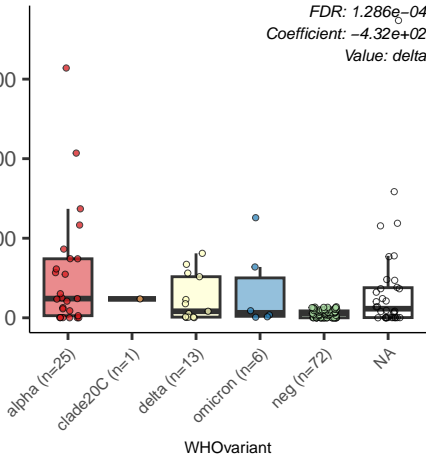



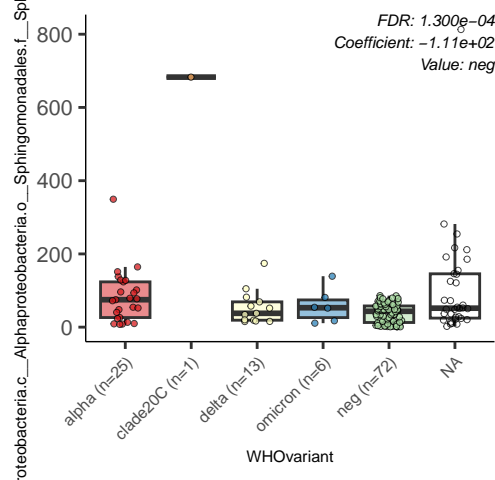

cteria.p\_\_Proteobacteria.c\_\_Alphaproteobacteria.o\_\_Rhodospirill

FDR:  $1.343e-04$   
Coefficient:  $-8.93e+02$   
Value: neg

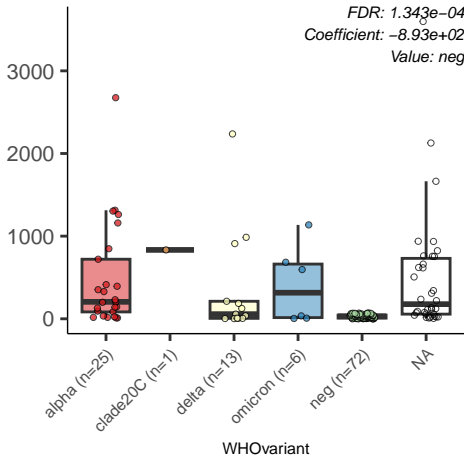

obacteria.c\_\_Actinomycetia.o\_\_Actinomycetales.f\_\_Actinomycetaceae

FDR:  $1.343e-04$   
Coefficient:  $-1.02e+03$   
Value: neg

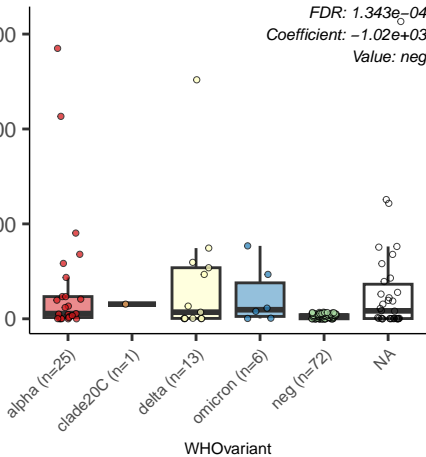

Proteobacteria.c\_\_Gammaproteobacteria.o\_\_Oceanospirillales.f

FDR:  $1.354e-04$   
Coefficient:  $-1.54e+04$   
Value: delta

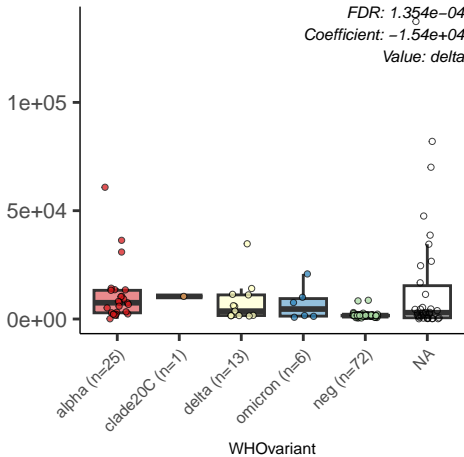

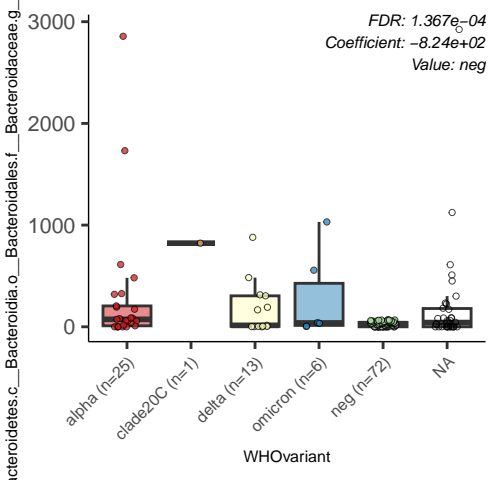

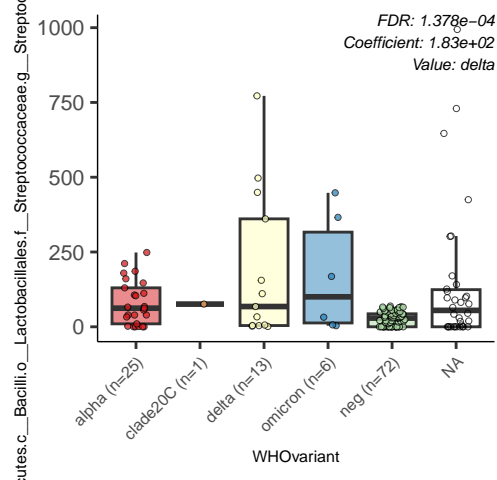

d\_Bacteria.p\_Firmicutes.c\_Negativicutes.o\_Acidaminobacteriia.g

FDR:  $1.386e-04$   
Coefficient:  $-1.52e+03$   
Value: neg

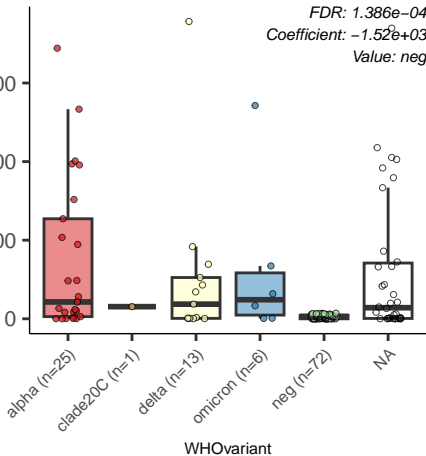

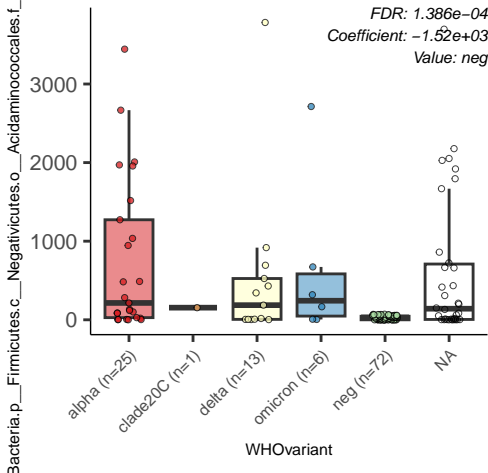



d\_Bacteria.p\_\_Proteobacteria.c\_\_Alphaproteobacteria.o\_\_Hyp

FDR:  $1.406e-04$   
Coefficient:  $-9.62e+03$   
Value: delta

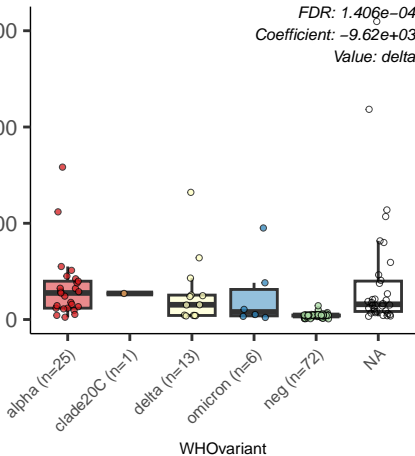

cteria.p\_\_Firmicutes.c\_\_Clostridia.o\_\_Eubacteriales.f\_\_Lachnospira

FDR:  $1.416 \times 10^{-4}$   
Coefficient:  $-1.28 \times 10^3$   
Value: omicron

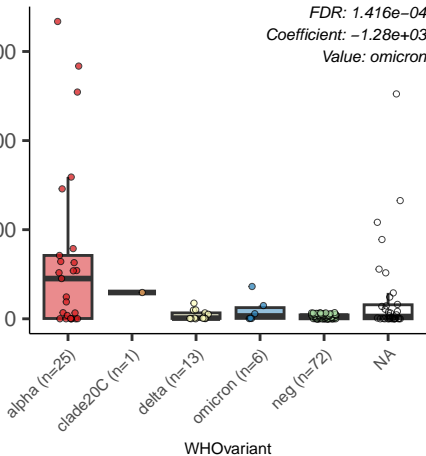

s.c.\_Clostridia.o\_\_Eubacteriales.f\_\_Lachnospiraceae.g\_\_Faecalica

FDR: 1.416e-04  
Coefficient: -1.28e+03  
Value: omicron

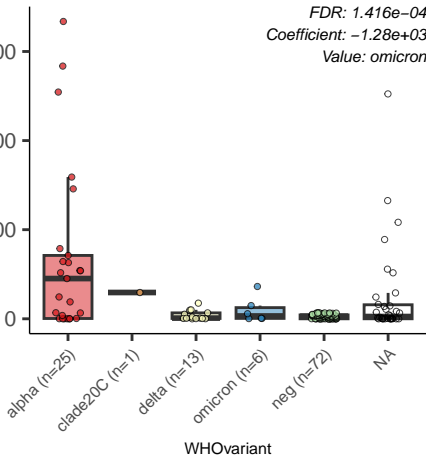

d\_\_Bacteria.p\_\_Actinobacteria.c\_\_Acidimicrobiia

FDR:  $1.468e-04$   
Coefficient:  $-3.10e+02$   
Value: neg

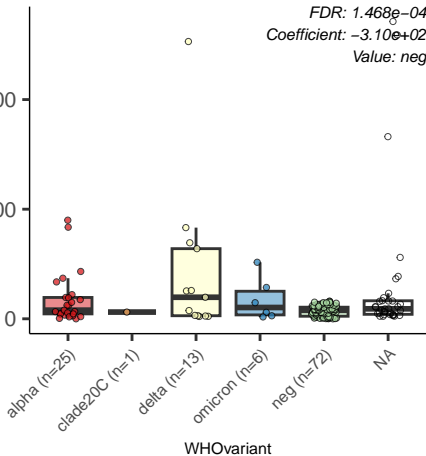

d\_Bacteria.p\_Actinobacteria.c\_Acidimicrobia.o\_Acidimicrobia.p

FDR:  $1.468 \times 10^{-4}$   
Coefficient:  $-3.10 \times 10^2$   
Value: neg

1000

500

0

alpha (n=25)

clade20C (n=1)

delta (n=13)

omicron (n=6)

neg (n=72)

NA

WHOvariant

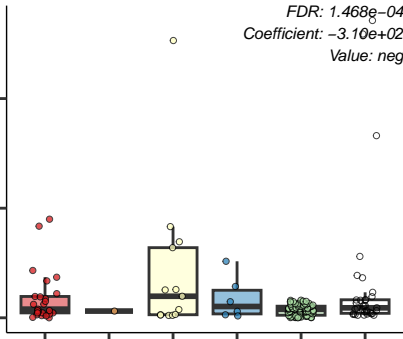

bacteria.c\_\_Fusobacteriia.o\_\_Fusobacteriales.f\_\_Leptotrichiaceae.g

FDR: 1.503e-04  
Coefficient: -1.29e+03  
Value: delta

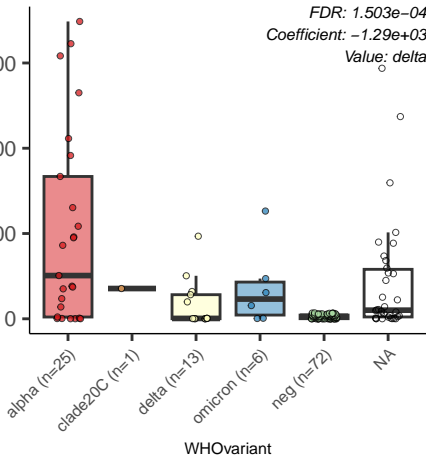

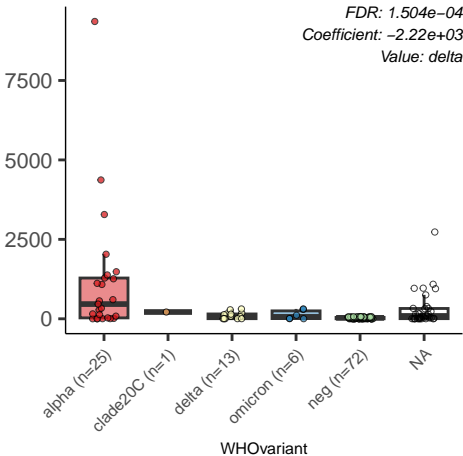

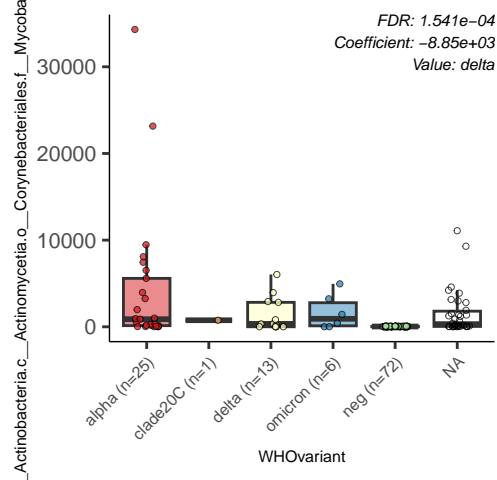



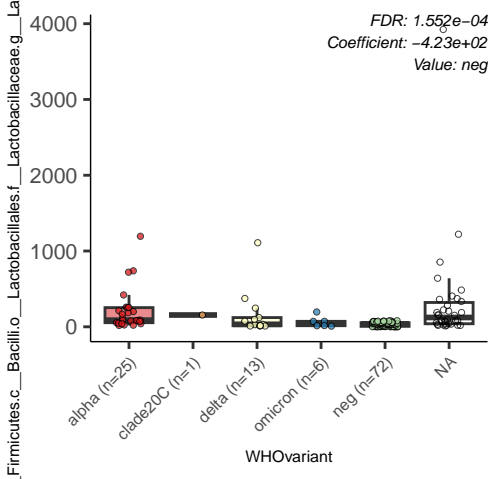

micutes.c\_\_Negativicutes.o\_\_Veillonellales.f\_\_Veillonellaceae.g\_\_Ve

FDR:  $1.577 \times 10^{-4}$   
Coefficient:  $-2.19 \times 10^4$   
Value: neg

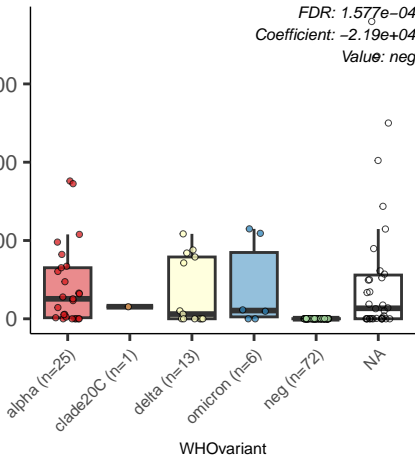

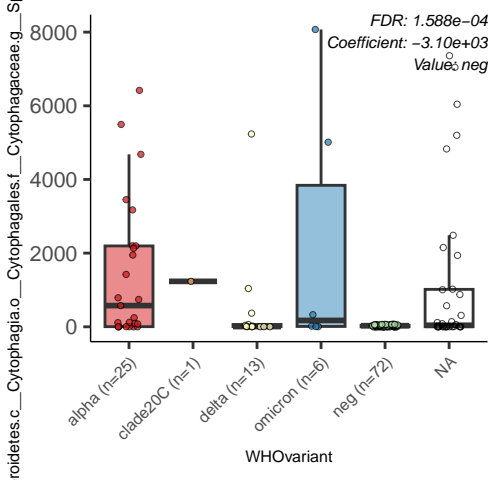

d\_Bacteria.p\_Actinobacteria.c\_Actinomycetia.o\_Streptos

FDR:  $1.593e-04$   
Coefficient:  $-1.75e+03$   
Value: omicron

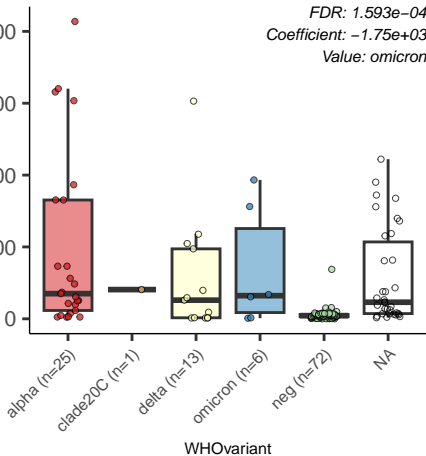

unicutes.c\_\_Bacilli.o\_\_Lactobacillales.f\_\_Streptococcaceae.g\_\_Strep

FDR:  $1.600e-04$   
Coefficient:  $-5.06e+03$   
Value: neg

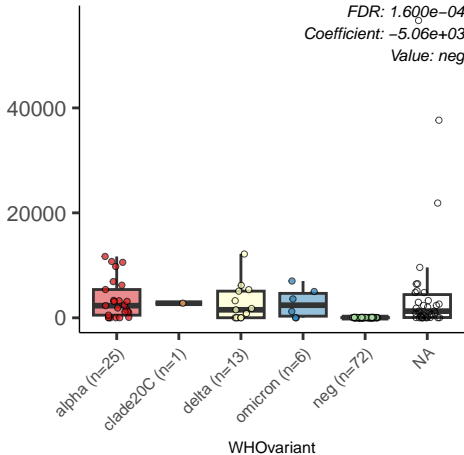

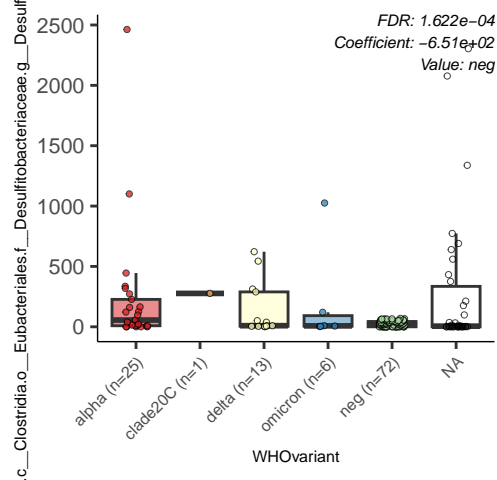

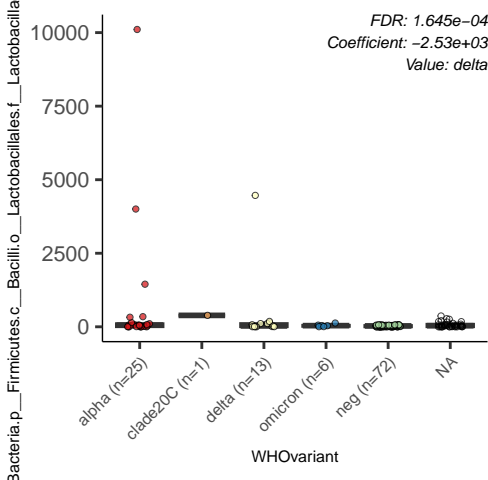

Actinomycetia.o\_\_Corynebacteriales.f\_\_Mycobacteriaceae.g\_\_My

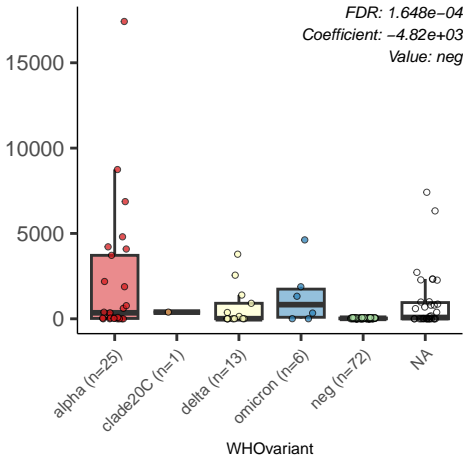



bacteria.p\_Actinobacteria.c\_Actinomyces.o\_Streptosporangiale

FDR:  $1.690e-04$   
Coefficient:  $-1.68e+03$   
Value: omicron

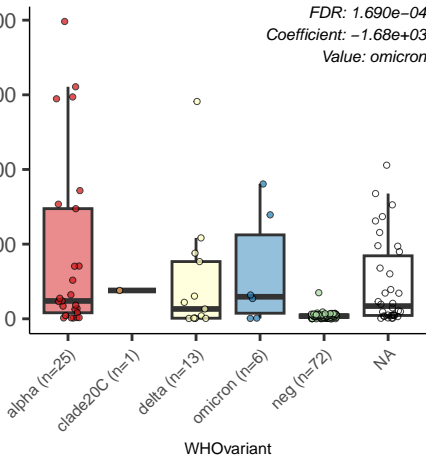

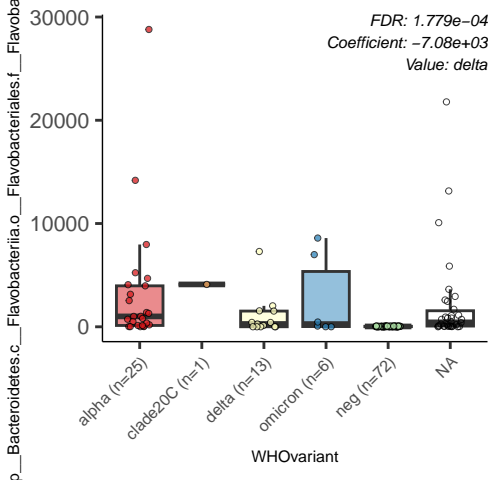

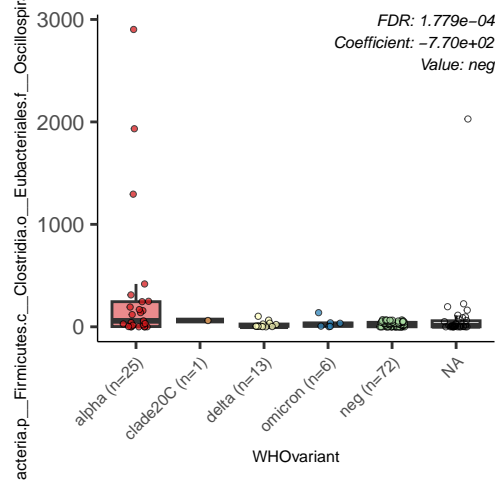

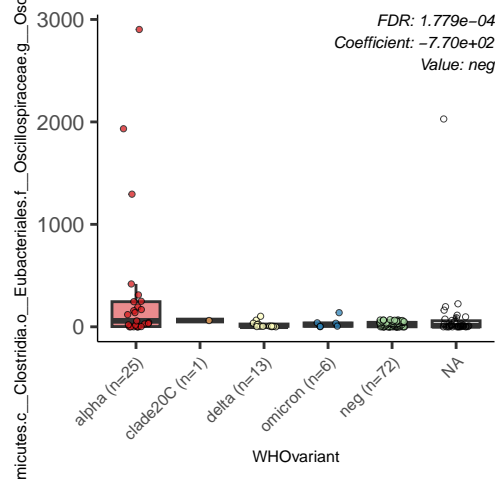

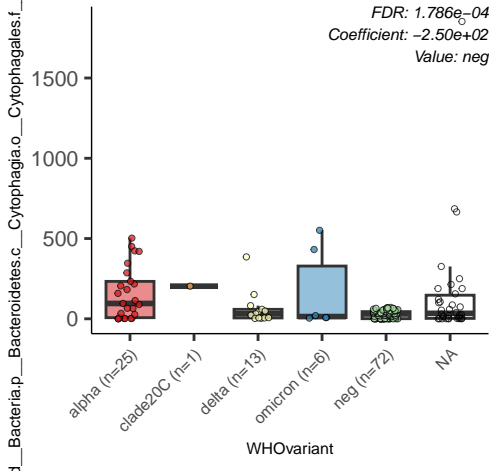

d\_\_Bacteria.p\_\_Candidatus.Saccharibacteria.c\_\_Candidatus.Sa

FDR:  $1.791e-04$   
Coefficient:  $-2.44e+05$   
Value: omicron

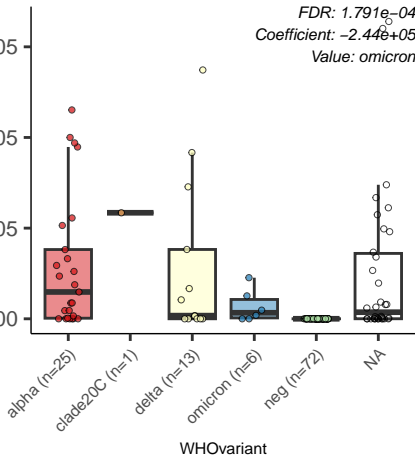

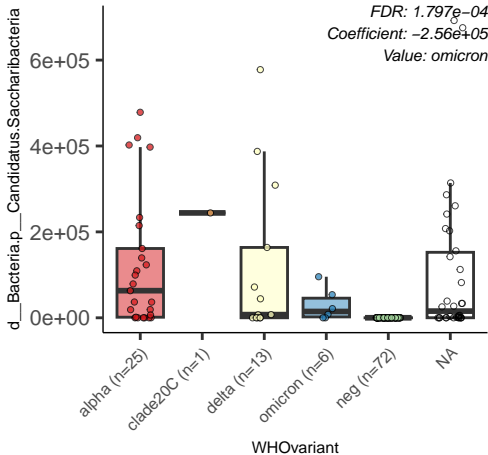

eria.p\_\_Verrucomicrobia.c\_\_Verrucomicrobiae.o\_\_Verrucomicrobiale

*FDR: 1.812e-04*  
*Coefficient: -6.83e+02*  
*Value: delta*

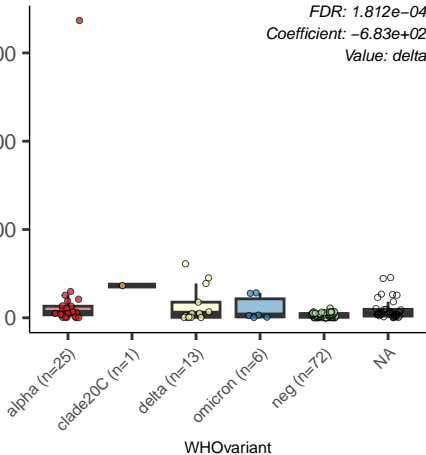



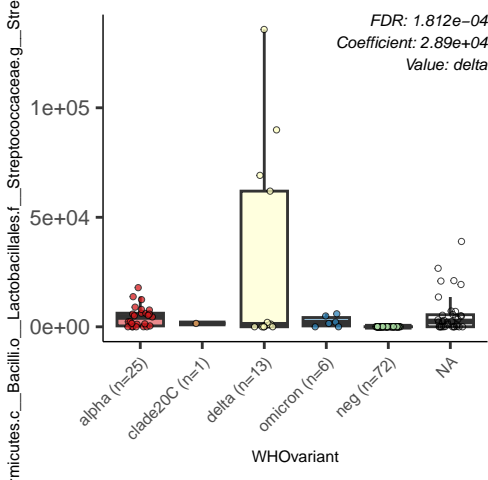

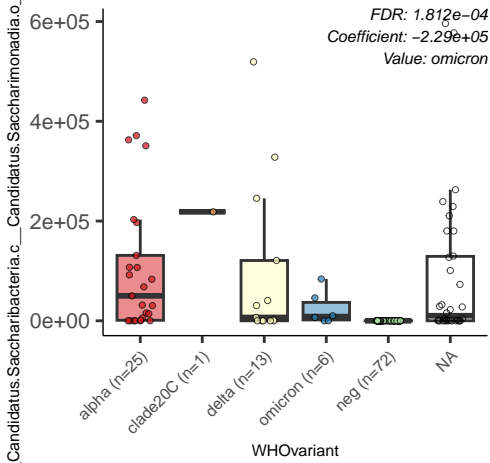

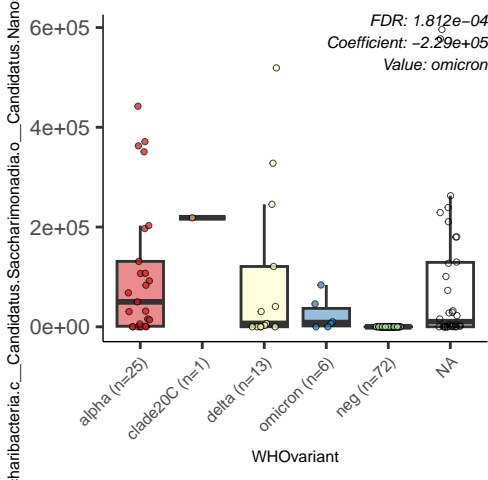

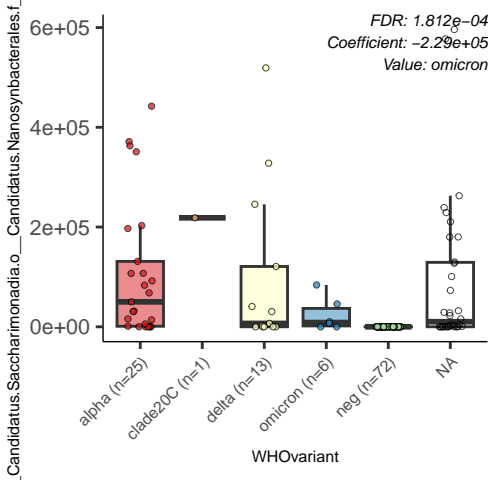

micutes.c\_\_Bacilli.o\_\_Lactobacillales.f\_\_Streptococcaceae.g\_\_Strep

FDR:  $1.824e-04$   
Coefficient:  $-4.26e+02$   
Value: neg

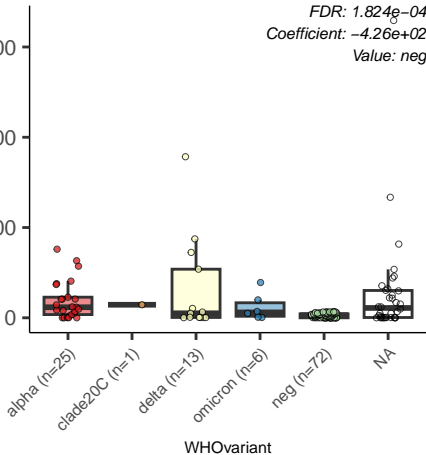

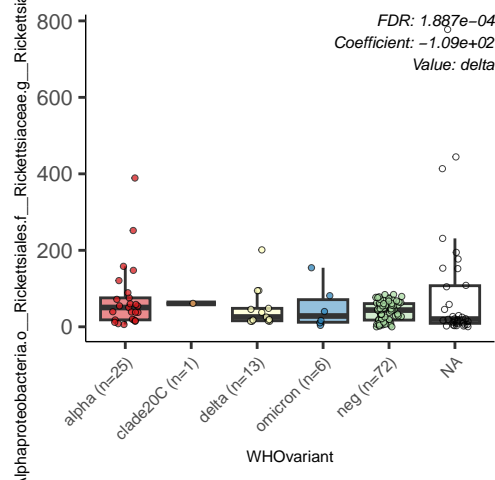

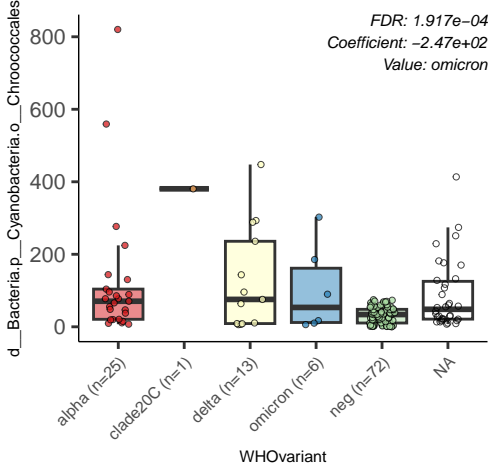

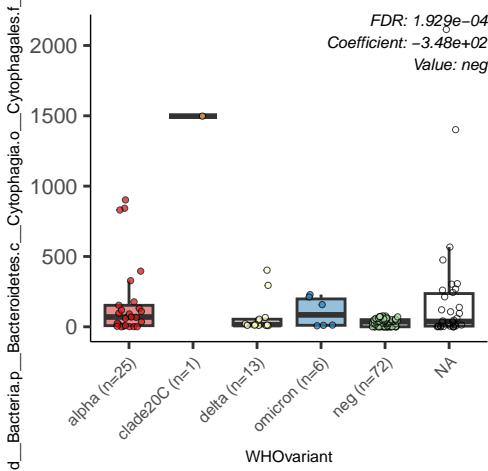



d\_Bacteria.p\_\_Proteobacteria.c\_\_Alphaproteobacteria.o\_\_Hyp

FDR:  $1.941 \times 10^{-4}$   
Coefficient:  $-1.12 \times 10^4$   
Value: omicron

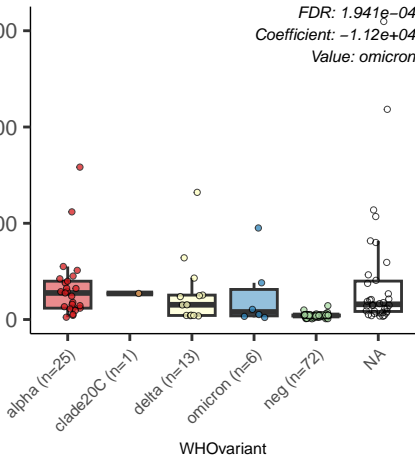

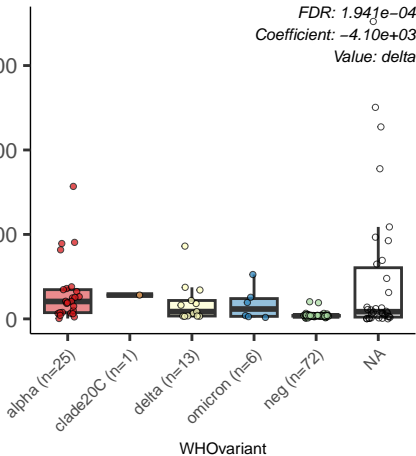

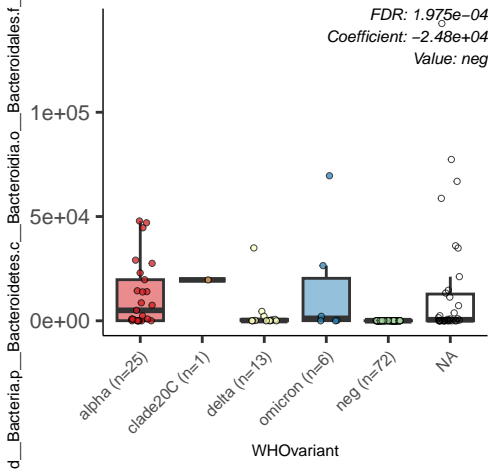

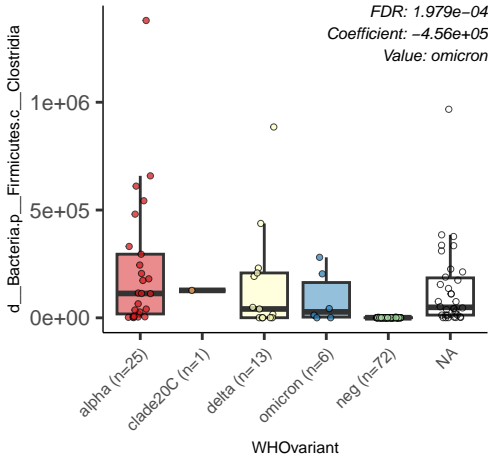

d\_\_Viruses.k\_\_Heunggongvirae.p\_\_Uroviricota.c\_\_Caudoviricetes.

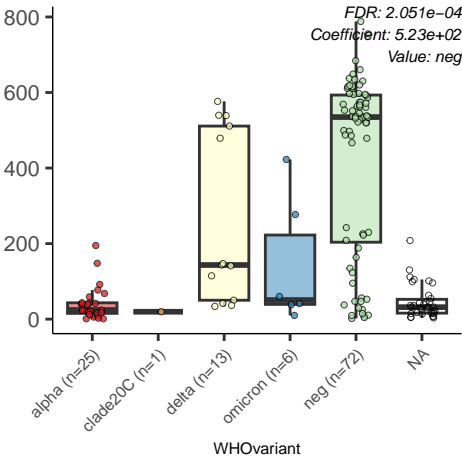

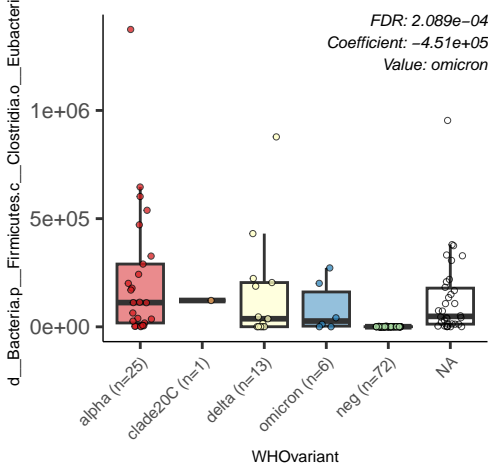

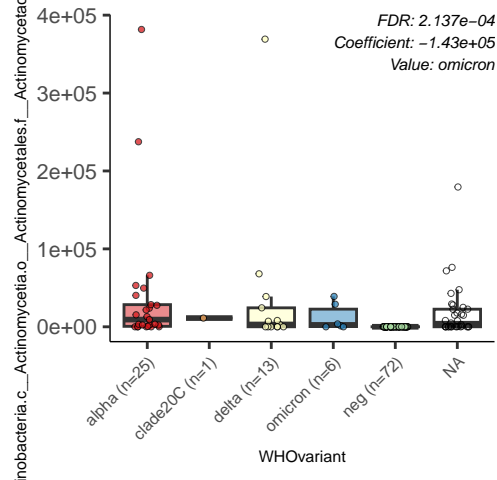

teroidetes.c\_\_Bacteroidia.o\_\_Bacteroidales.f\_\_Bacteroidaceae.g

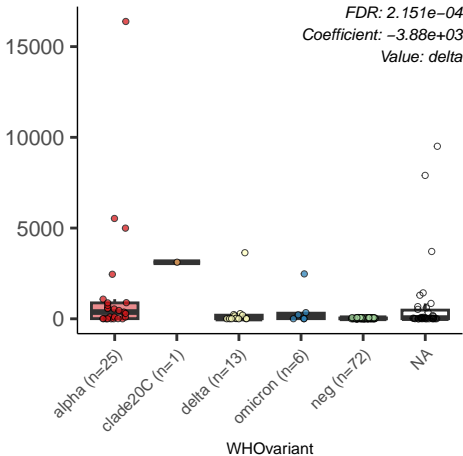



c\_\_Clostridia.o\_\_Eubacteriales.f\_\_Desulfotobiaceae.g\_\_Desulf

FDR:  $2.178e-04$   
Coefficient:  $-4.02e+02$   
Value: delta

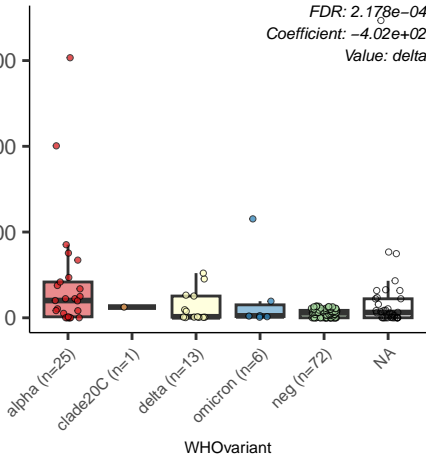

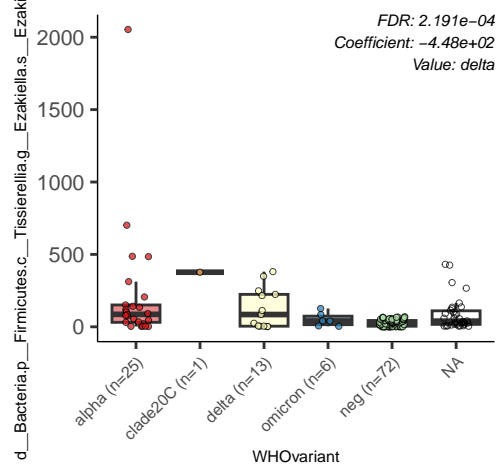



bacteria.p\_Firmicutes.c\_Clostridia.o\_Eubacteriales.f\_Lachnosp

*FDR: 2.249e-04*  
*Coefficient: -5.65e+02*  
*Value: delta*

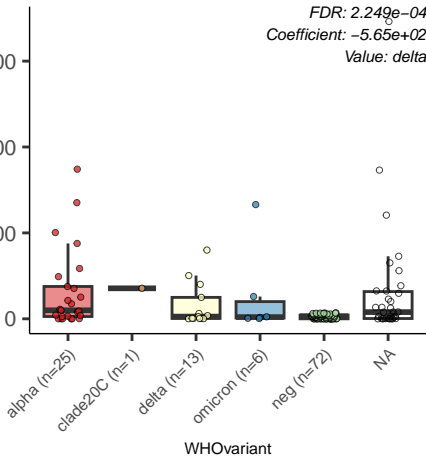

irmicutes.c\_\_Clostridia.o\_\_Eubacteriales.f\_\_Lachnospiraceae.g\_\_S

$FDR: 2.249e-04$   
 $Coefficient: -5.65e+02$   
 $Value: delta$

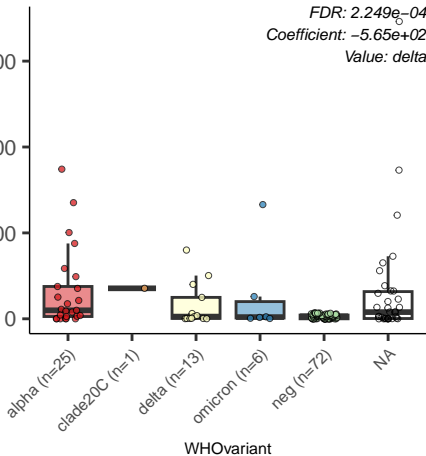

terial.p\_\_Proteobacteria.c\_\_Gammaproteobacteria.o\_\_Oceanospirill

FDR:  $2.264 \times 10^{-4}$   
Coefficient:  $-1.51 \times 10^4$   
Value: delta

1e+05  
5e+04  
0e+00

alpha (n=25)

clade20C (n=1)

delta (n=13)

omicron (n=6)

neg (n=72)

NA

WHOvariant

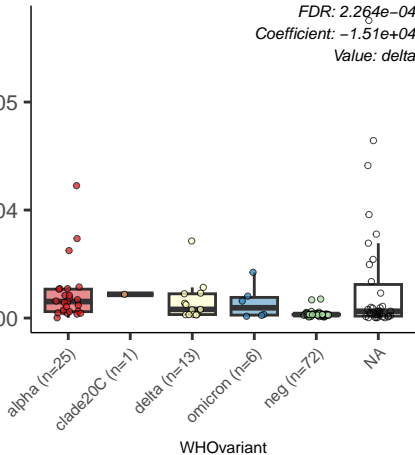

d\_Bacteria.p\_Firmicutes.c\_Clostridia.o\_Eubacteriales.f\_La

FDR:  $2.270e-04$   
Coefficient:  $-2.42e+05$   
Value: omicron

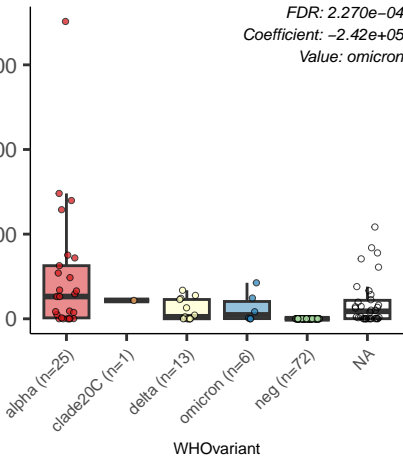

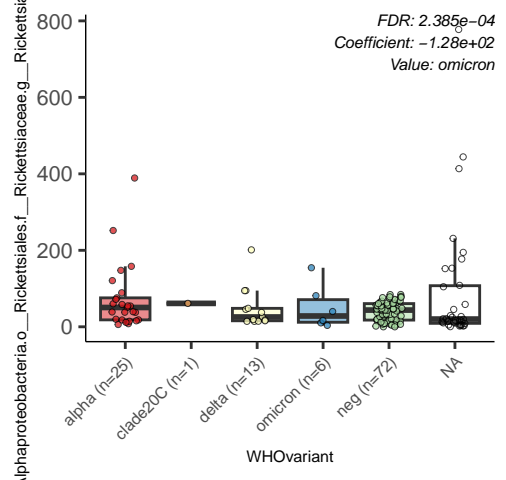



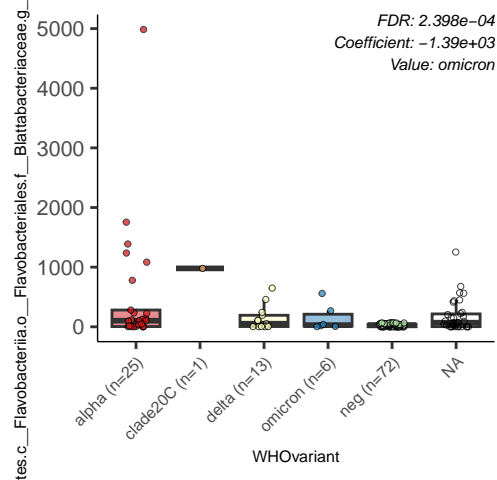

ia.c\_Actinomycetia.o\_Bifidobacteriales.f\_Bifidobacteriaceae.g

FDR:  $2.398e-04$   
Coefficient:  $-4.18e+03$   
Value: neg

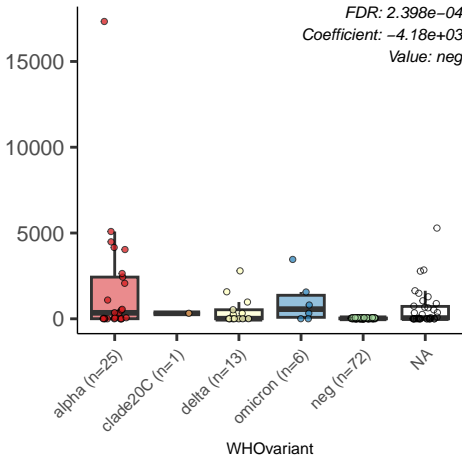

d\_Bacteria.p\_Firmicutes.c\_\_Clostridia.o\_\_Halanaerobiales.f\_\_H

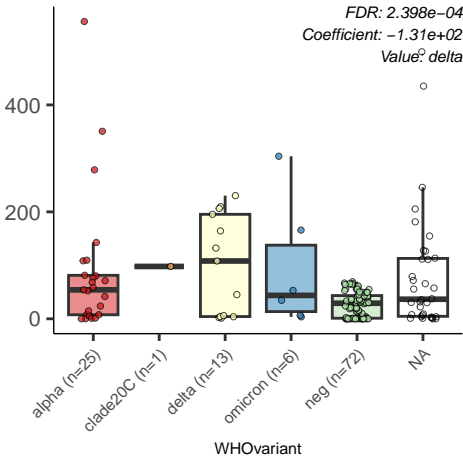

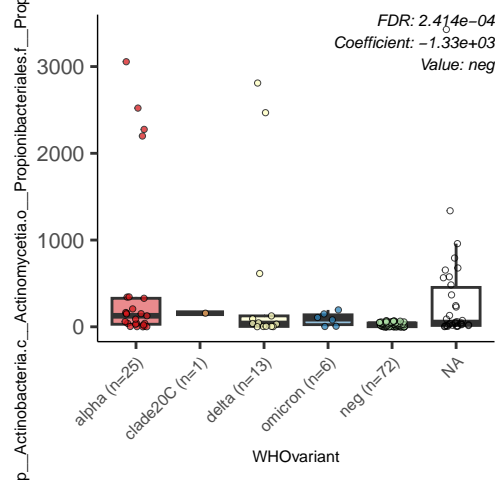

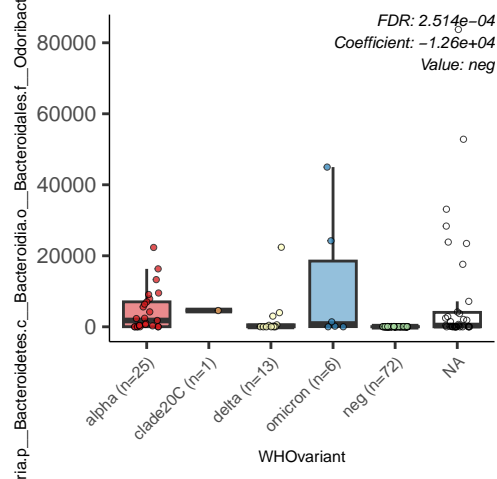

o\_\_Proteobacteria.c\_\_Alphaproteobacteria.o\_\_Rickettsiales.f\_\_Anapl

FDR:  $2.538e-04$   
Coefficient:  $-3.46e+02$   
Value: omicron

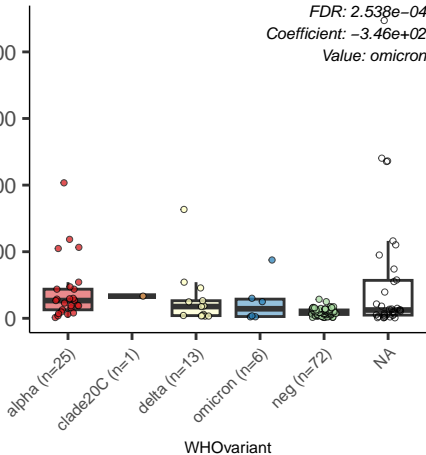

d\_Bacteria.p\_\_Proteobacteria.c\_\_Alphaproteobacteria.o\_\_Rh

FDR:  $2.544e-04$   
Coefficient:  $-2.88e+03$   
Value: neg

10000

5000

alpha (n=25)

clade20C (n=1)

delta (n=13)

omicron (n=6)

neg (n=72)

NA

WHOvariant

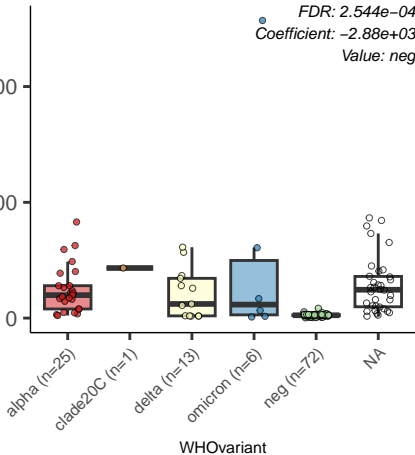

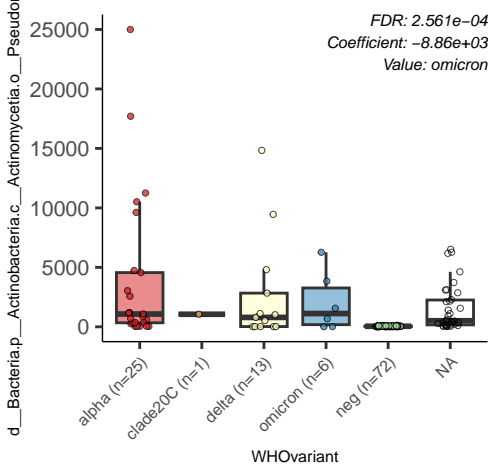



bacteria.p\_Actinobacteria.c\_Actinomycetia.o\_Pseudonocardiales.f

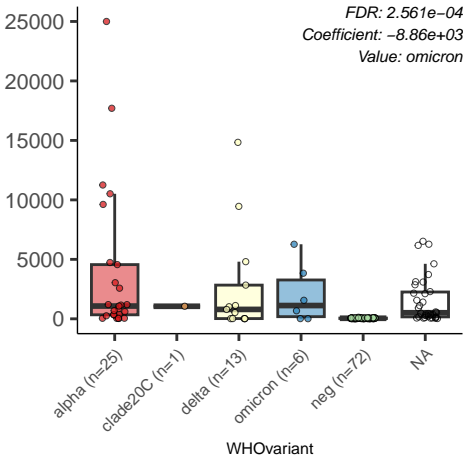

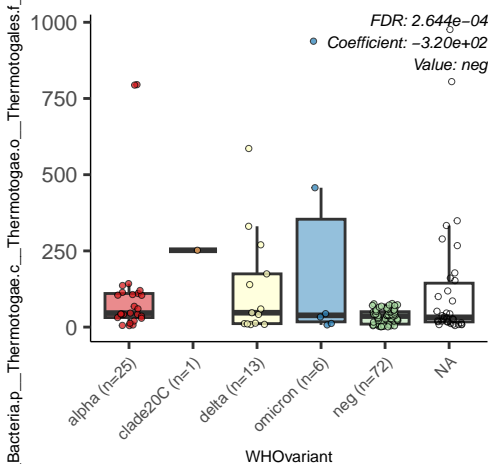

d\_\_Bacteria.p\_\_Firmicutes.c\_\_Tissierellia.g\_\_Ezakiella

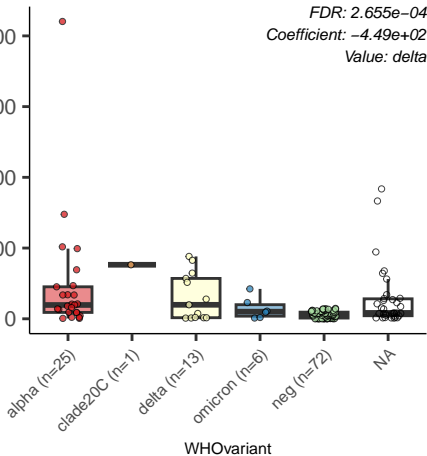

ria.p\_\_Bacteroidetes.c\_\_Flavobacteriia.o\_\_Flavobacteriales.f\_\_Flav

FDR:  $2.722e-04$   
Coefficient:  $-2.41e+02$   
Value: omicron

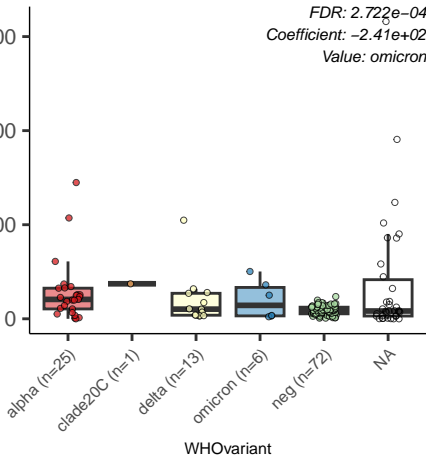

acteroidetes.c\_\_Flavobacteriia.o\_\_Flavobacteriales.f\_\_Flavobacteri

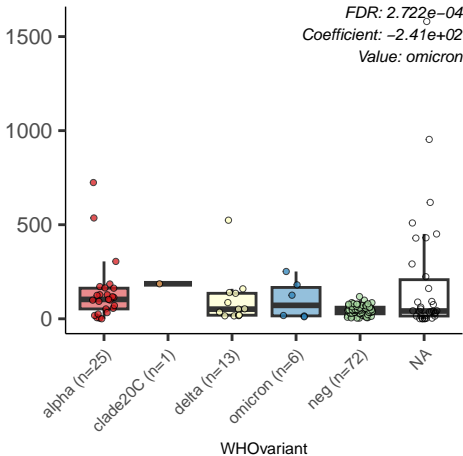



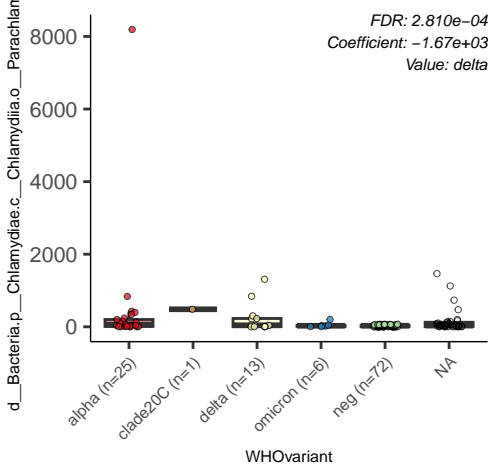

d\_\_Bacteria.p\_\_Proteobacteria.c\_\_Gammaproteobacteria.o\_\_O

FDR:  $2.830e-04$   
Coefficient:  $-1.50e+04$   
Value: delta

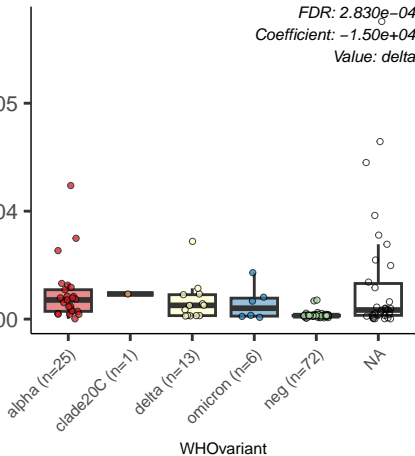



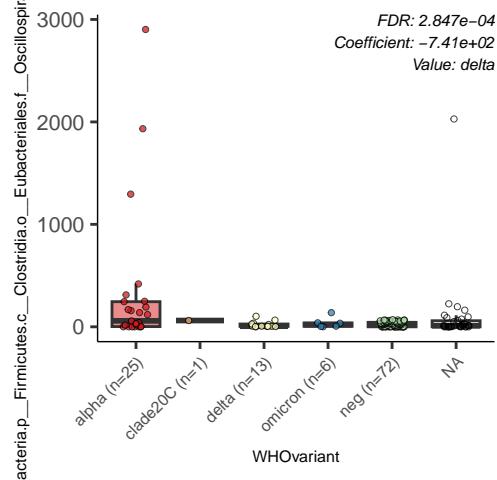

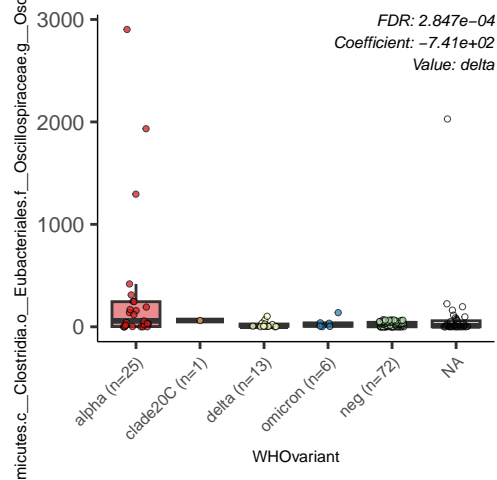

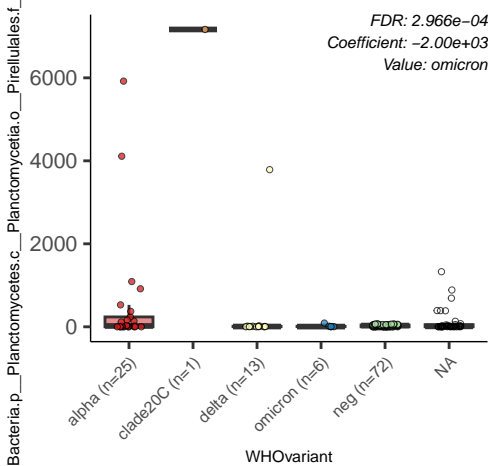

ia.p\_\_Planctomycetes.c\_\_Planctomycetia.o\_\_Pirellulales.f\_\_Therm

FDR: 2.966e-04  
Coefficient: -2.00e+03  
Value: omicron

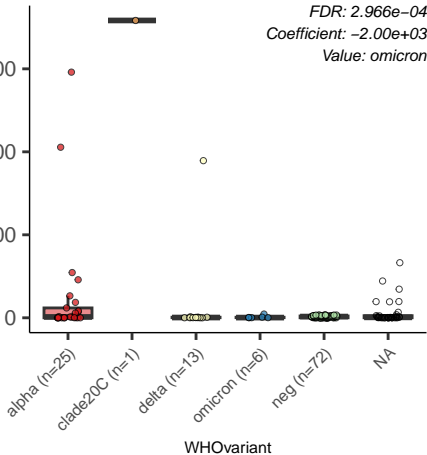

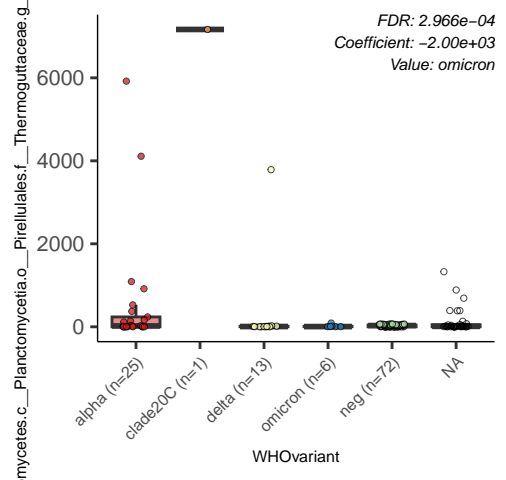

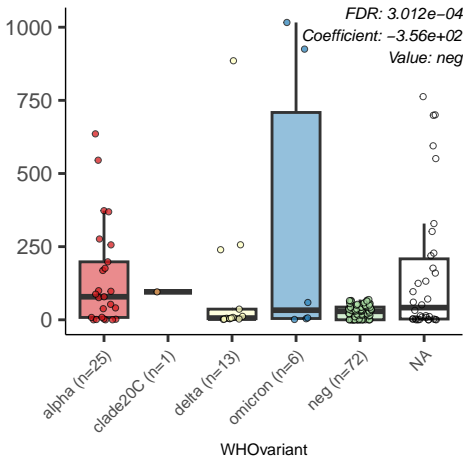

s.c\_Flavobacteriia.o\_Flavobacteriales.f\_Weeksellaceae.g\_Chry

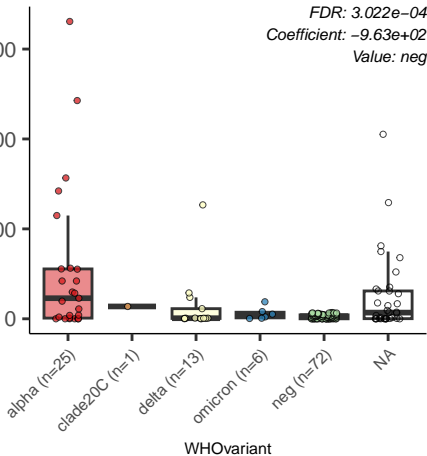

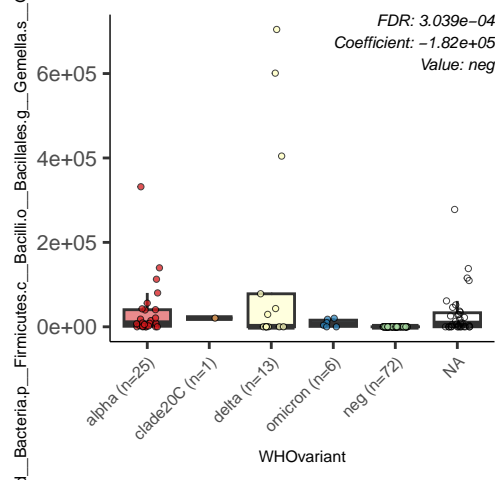



.p\_\_Verrucomicrobia.c\_\_Opitutae.o\_\_Puniceicoccales.f\_\_Puniceico

FDR:  $3.127 \times 10^{-4}$   
Coefficient:  $-5.20 \times 10^2$   
Value: omicron

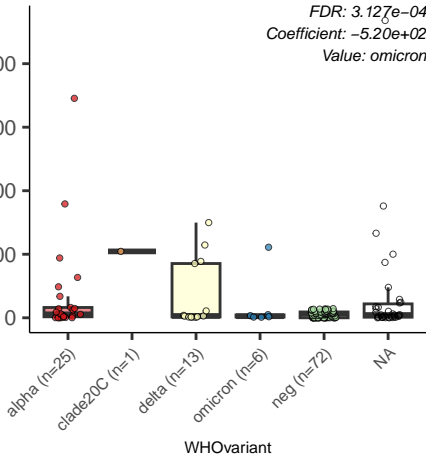

obia.c\_\_Opitutae.o\_\_Puniceicoccales.f\_\_Puniceicoccaceae.g\_\_Corr

FDR:  $3.127e-04$   
Coefficient:  $-5.20e+02$   
Value: omicron

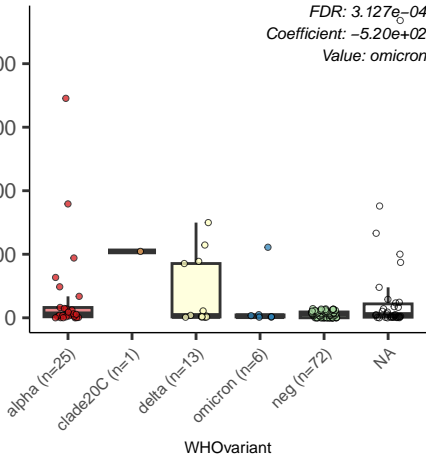

bacteria.p\_\_Firmicutes.c\_\_Clostridia.o\_\_Eubacteriales.f\_\_Clostridia

FDR:  $3.236e-04$   
Coefficient:  $-7.03e+02$   
Value: delta

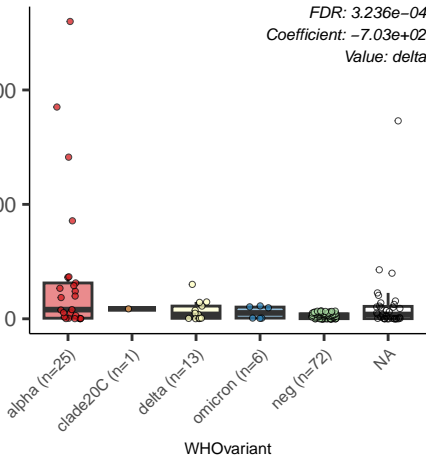

nicutes.c\_\_Clostridia.o\_\_Eubacteriales.f\_\_Clostridiaceae.g\_\_Serper

*FDR: 3.236e-04*  
*Coefficient: -7.03e+02*  
*Value: delta*

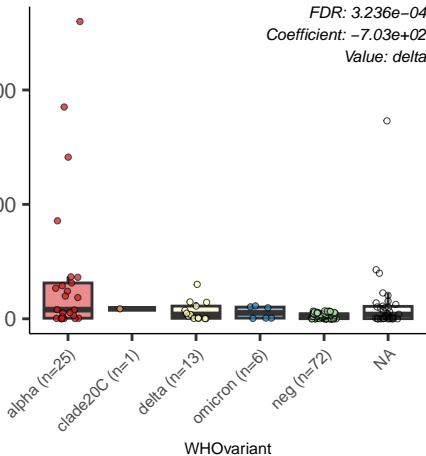

bacteria.c\_\_Fusobacteriia.o\_\_Fusobacteriales.f\_\_Leptotrichiaceae.g

FDR:  $3.273e-04$   
Coefficient:  $-1.47e+03$   
Value: omicron

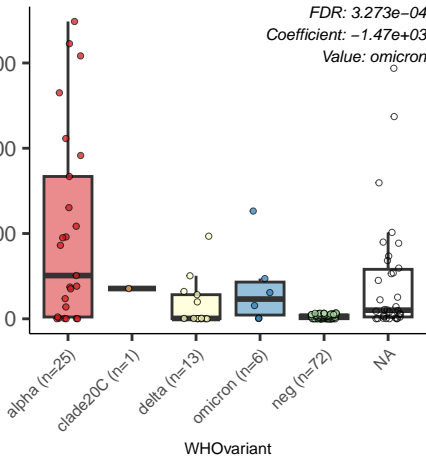

Firmicutes.c\_\_Clostridia.o\_\_Eubacteriales.f\_\_Clostridiaceae.g\_\_Clo

FDR:  $3.415e-04$   
Coefficient:  $-4.05e+02$   
Value: omicron

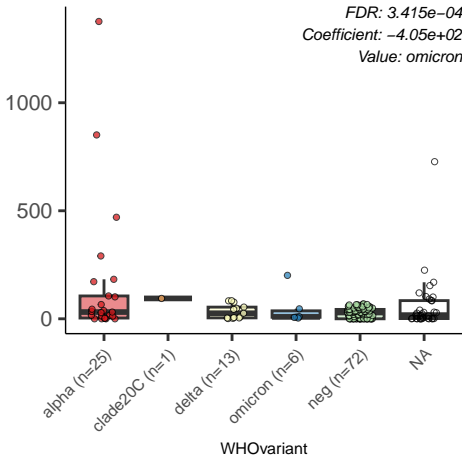

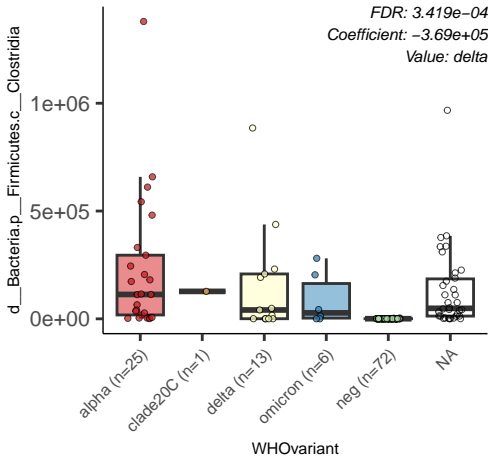

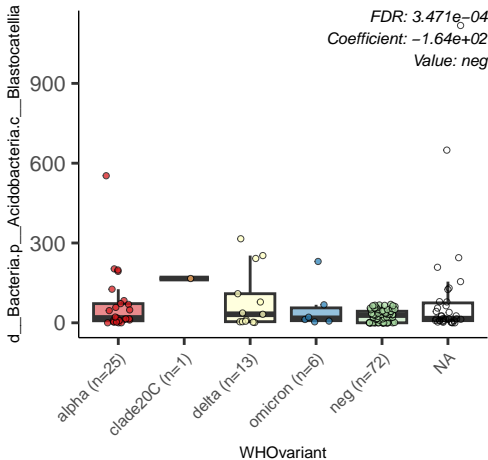



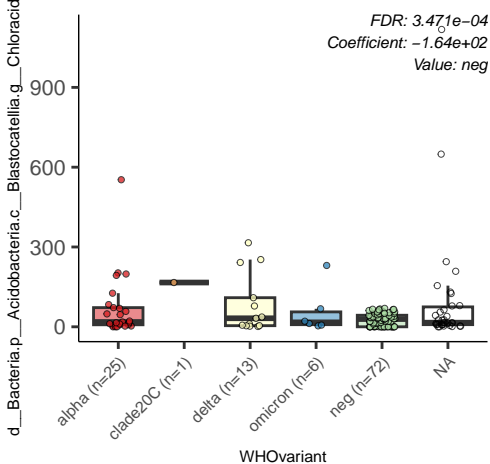

bacteria.c\_\_Gammaproteobacteria.o\_\_Pasteurellales.f\_\_Pasteurellace

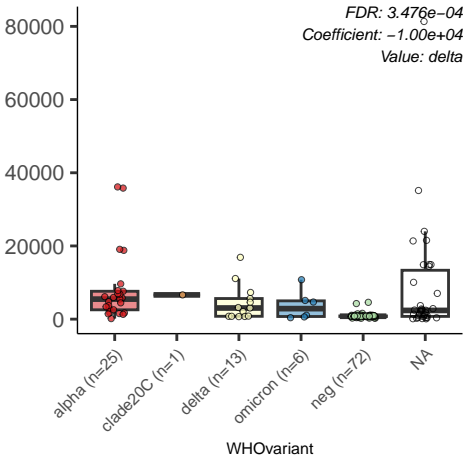

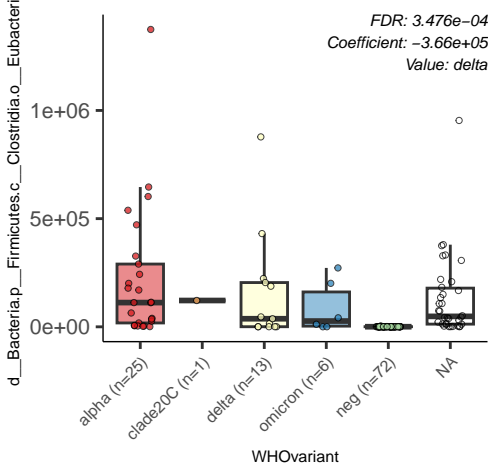

FDR:  $3.482e-04$   
Coefficient:  $-1.76e+04$   
Value: neg

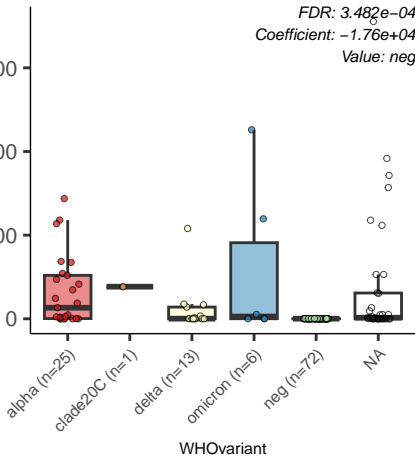

utes.c\_\_Clostridia.o\_\_Eubacteriales.f\_\_Lachnospiraceae.g\_\_Medite

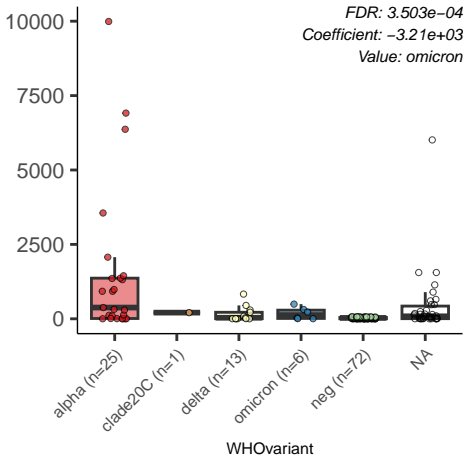

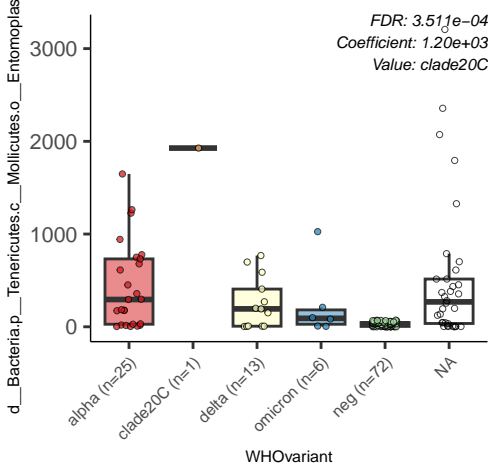

d\_\_Bacteria.p\_\_Firmicutes.c\_\_Bacilli.o\_\_Bacillales.g\_\_Exigu

FDR:  $3.522e-04$   
Coefficient:  $-4.80e+02$   
Value: neg

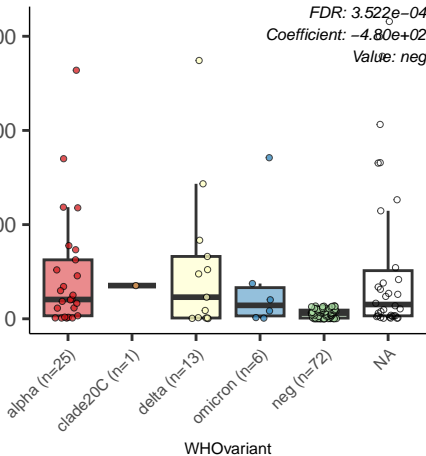

eroidetes.c\_\_Bacteroidia.o\_\_Bacteroidales.f\_\_Tannerellaceae.g\_\_Ta

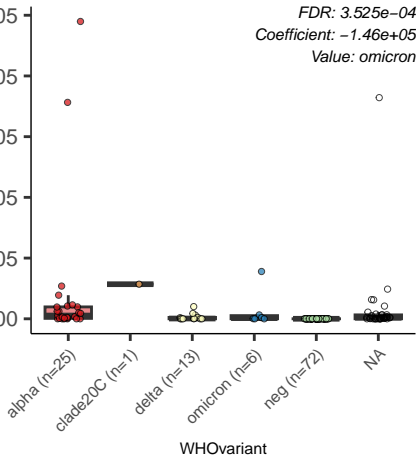



d\_Bacteria.p\_\_Cyanobacteria.o\_\_Nostocales.f\_\_Scytonemataceae

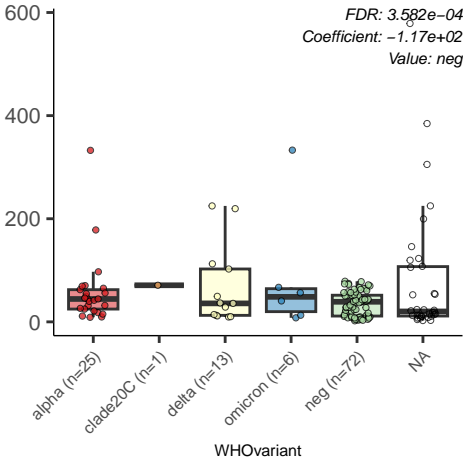

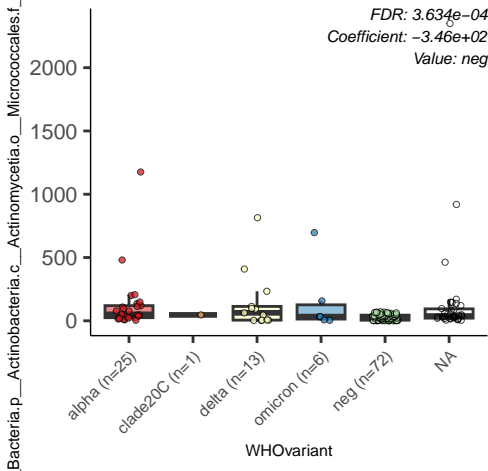

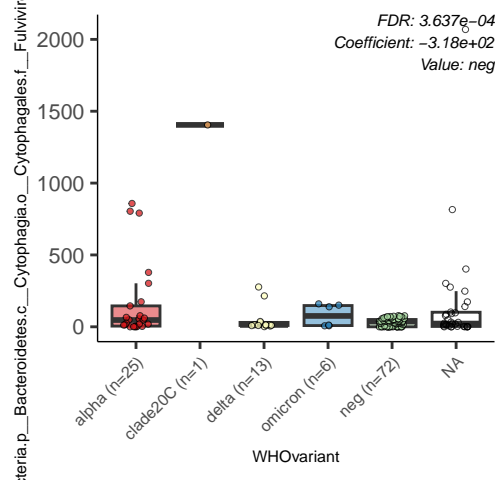

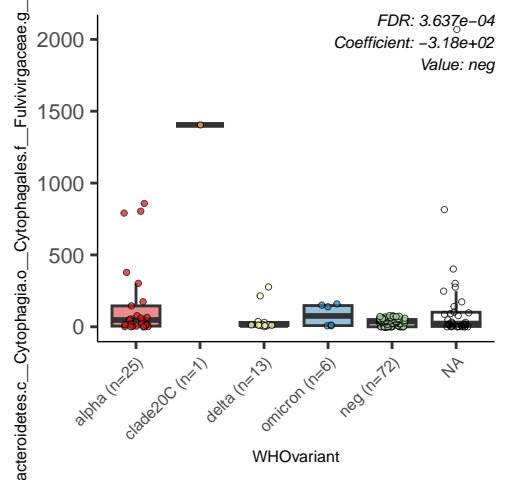

bacteria.c\_\_Gammaproteobacteria.o\_\_Pasteurellales.f\_\_Pasteurellace

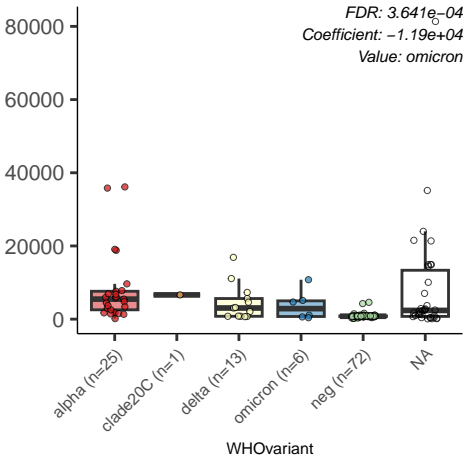

acteria.p\_\_Proteobacteria.c\_\_Gammaproteobacteria.o\_\_Enterobac

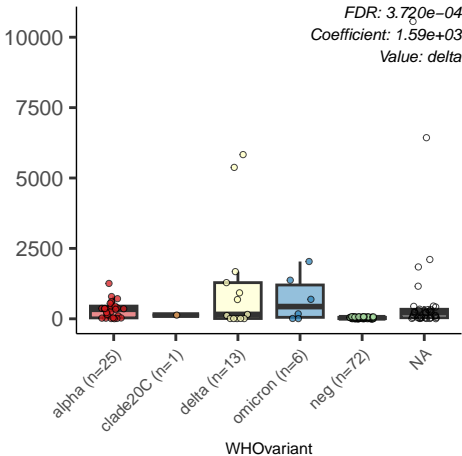

s.c.\_Clostridia.o\_\_Eubacteriales.f\_\_Eubacteriales.Family.XIII..Ince

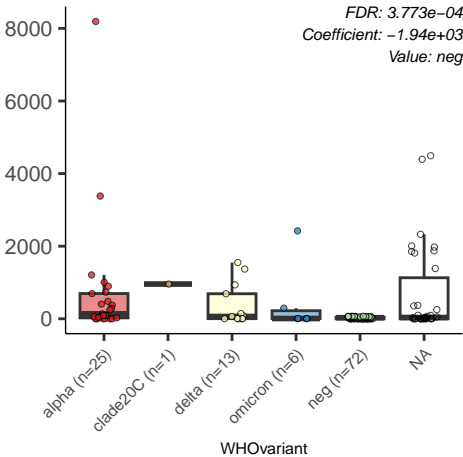

Firmicutes.c\_\_Clostridia.o\_\_Eubacteriales.f\_\_Eubacteriales.Family.X

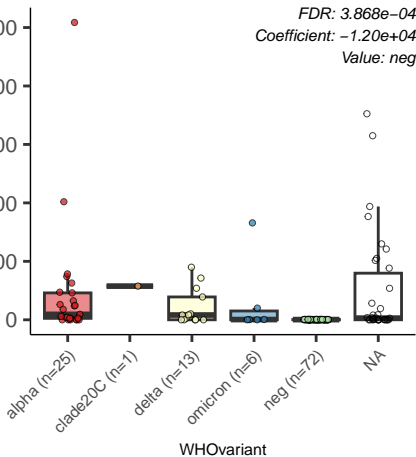



Clostridia.o\_\_Eubacteriales.f\_\_Eubacteriales.Family.XIII..Incertae.S

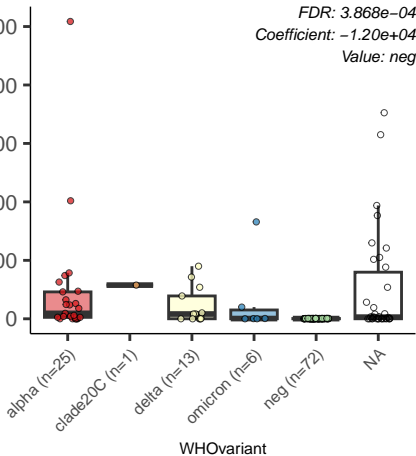

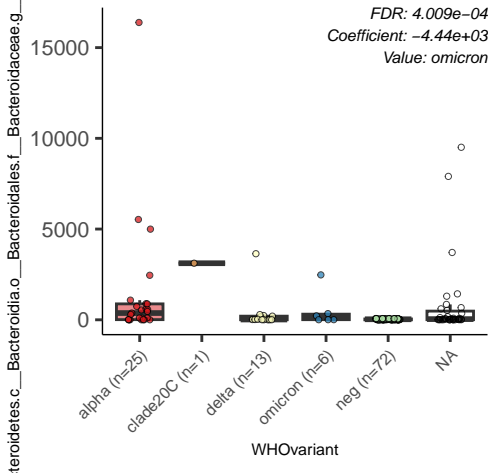

Bacteria.p\_Firmicutes.c\_Bacilli.o\_Lactobacillales.f\_Aerococca

FDR:  $4.025e-04$   
Coefficient:  $-4.69e+02$   
Value: omicron

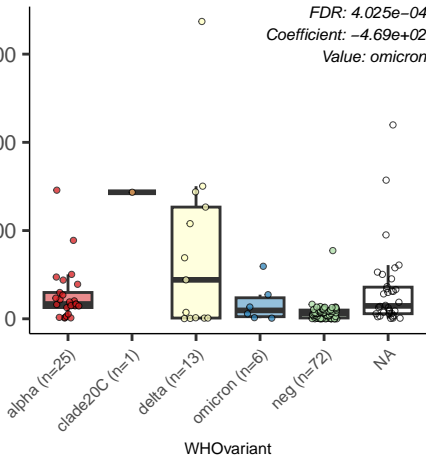

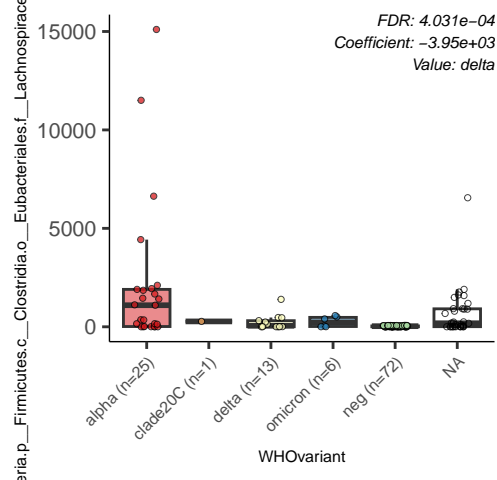

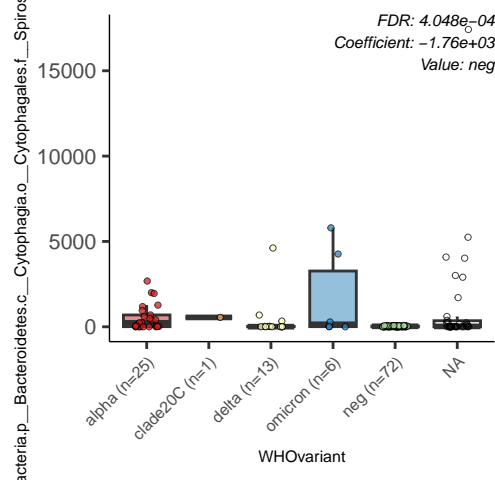

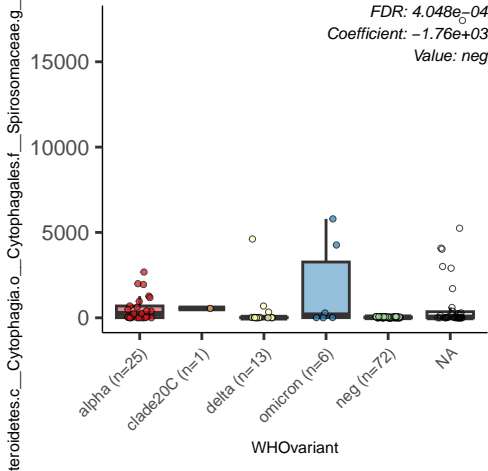

\_Actinobacteria.c\_\_Actinomycetia.o\_\_Corynebacteriales.f\_\_Mycoba

FDR:  $4.086e-04$   
Coefficient:  $-9.91e+03$   
Value: omicron

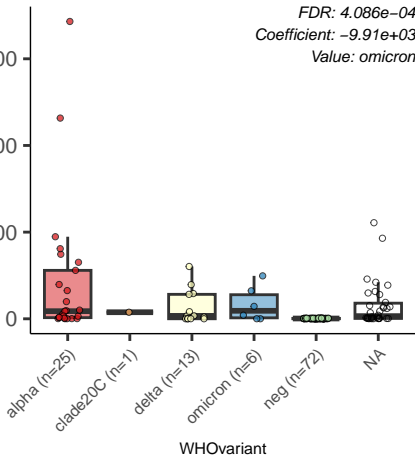

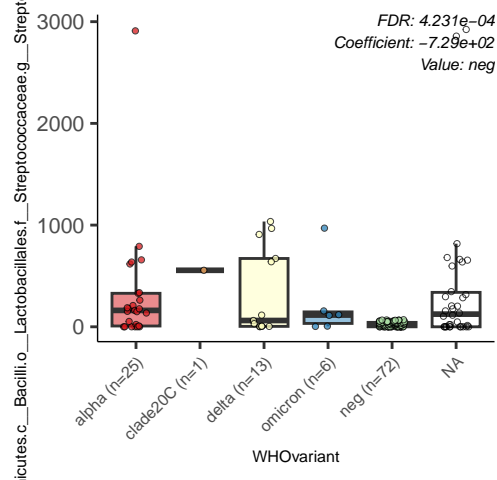



acteria.p\_\_Firmicutes.c\_\_Clostridia.o\_\_Eubacteriales.f\_\_Lachnospira

FDR: 4.249e-04  
Coefficient: -2.15e+03  
Value: omicron

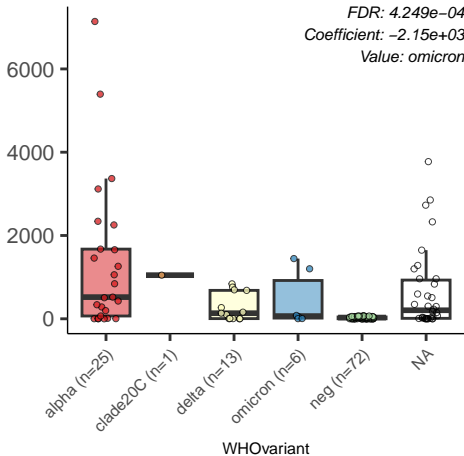

phylum: Bacteriophages  
class: Bacilli  
order: Bacillales  
family: Streptococcaceae  
genus: Streptococcus

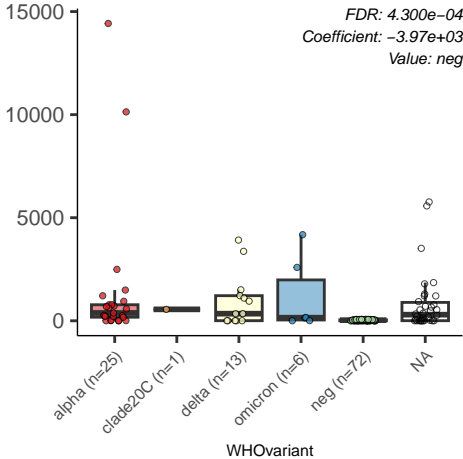

psilonproteobacteria.o\_\_Campylobacterales.f\_\_Campylobacteraceae

FDR:  $4.307e-04$   
Coefficient:  $-1.06e+03$   
Value: neg

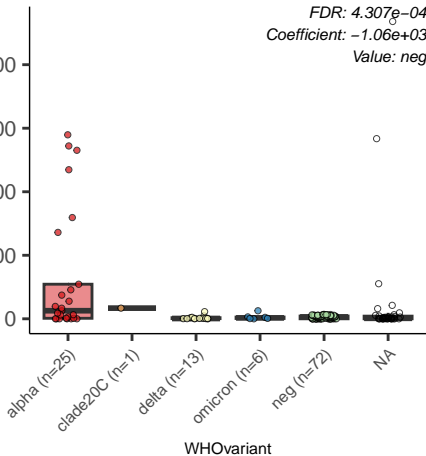

Firmicutes.c\_\_Clostridia.o\_\_Eubacteriales.f\_\_Clostridiaceae.g\_\_Clo

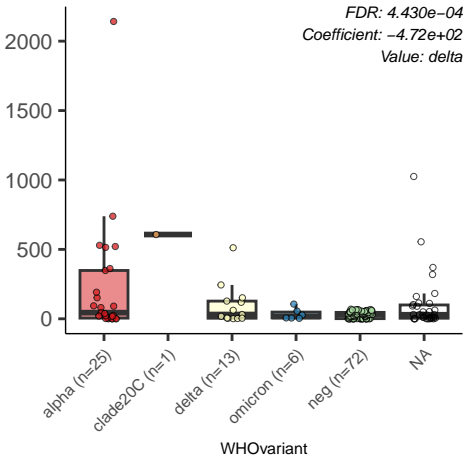

idetes.c\_\_Bacteroidia.o\_\_Bacteroidales.f\_\_Tannerellaceae.g\_\_Para

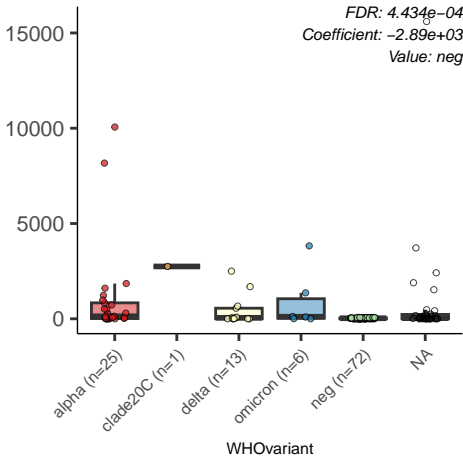

cutes.c\_Bacilli.o\_Lactobacillales.f\_Streptococcaceae.g\_Strepto

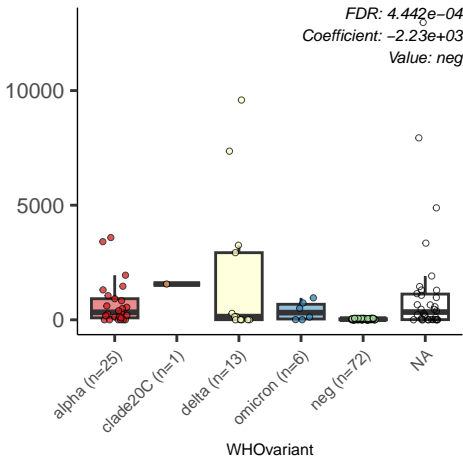

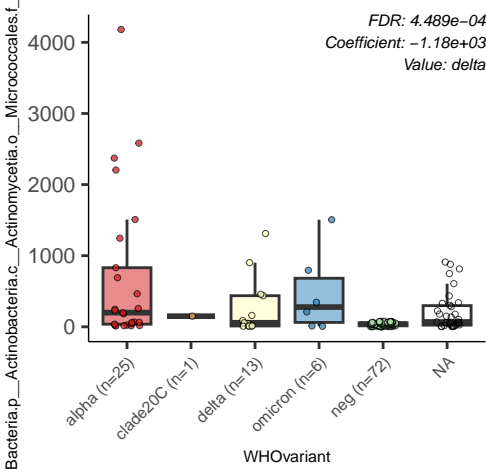

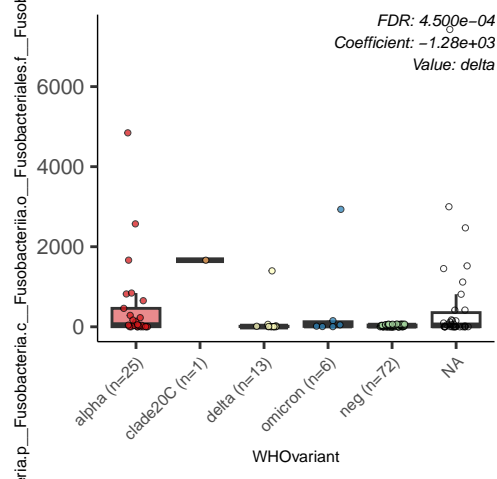



FDR:  $4.500e-04$   
Coefficient:  $-1.28e+03$   
Value: delta

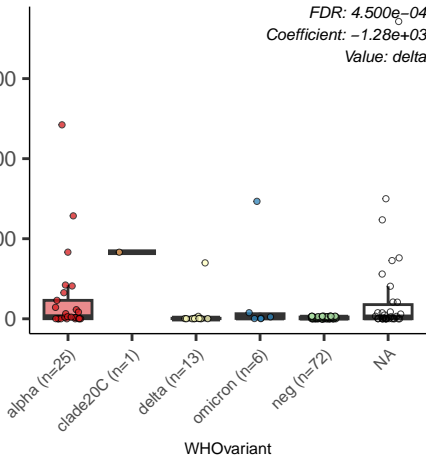

d\_Bacteria.p\_\_Proteobacteria.c\_\_Deltaproteobacteria.o\_\_My

FDR:  $4.507e-04$   
Coefficient:  $-5.31e+02$   
Value: neg

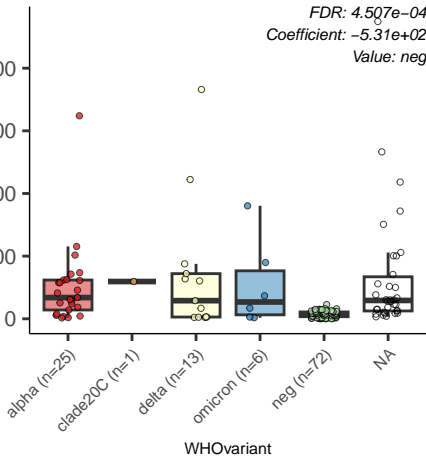

\_\_Bacteria.p\_\_Bacteroidetes.c\_\_Flavobacteriia.o\_\_Flavobacteriales

FDR:  $4.507e-04$   
Coefficient:  $-2.32e+02$   
Value: delta

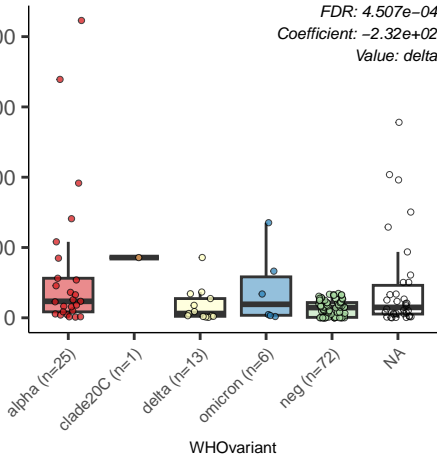

eria.p\_\_Proteobacteria.c\_\_Deltaproteobacteria.o\_\_Desulfovibrionales

FDR:  $4.584e-04$   
Coefficient:  $-2.46e+02$   
Value: delta

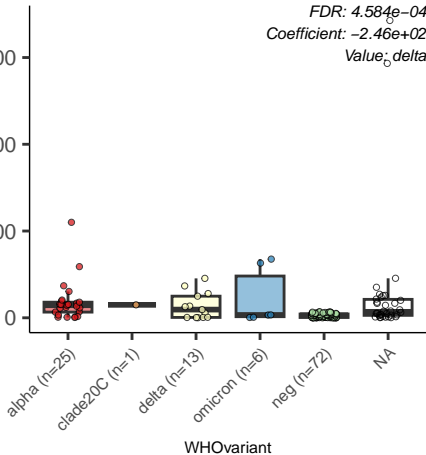

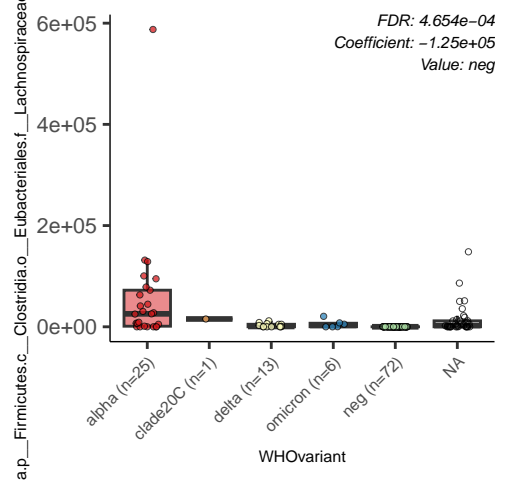

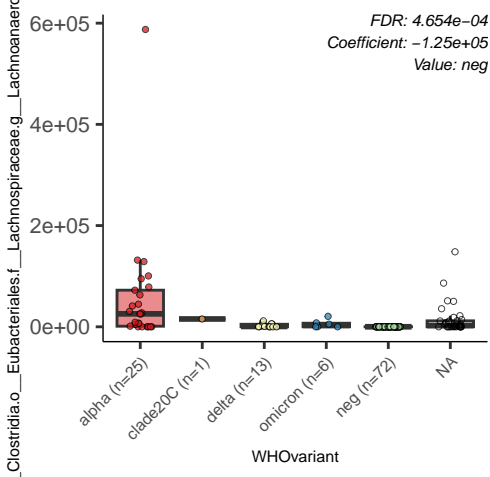

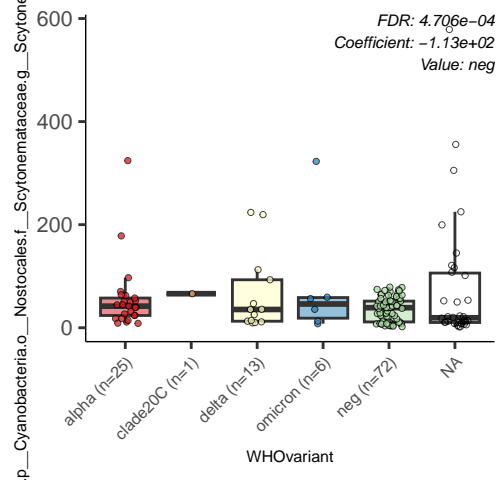

Actinomyces, Propionibacteriales, f. Propionibacteriales

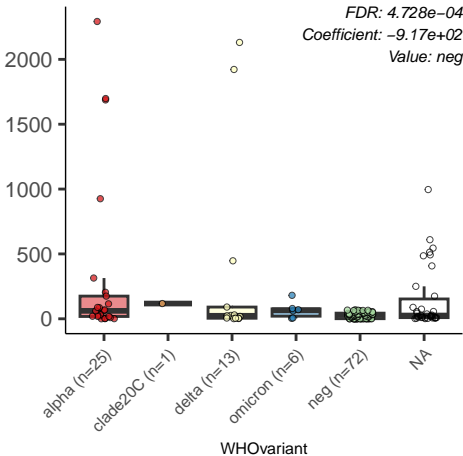



a.c.\_Thermoleophilia.o\_\_Solirubrobacterales.f\_\_Conexibacteraceae

*FDR: 4.818e-04*  
*Coefficient: -5.21e+02*  
*Value: delta*

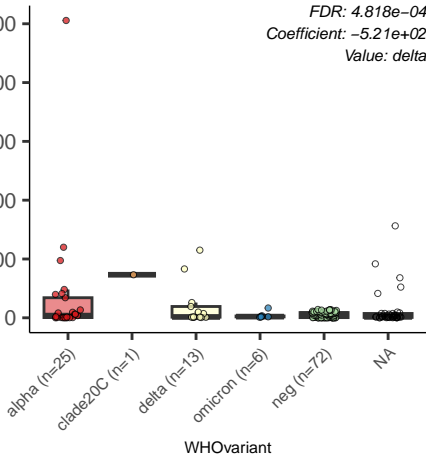

bacteria.c\_\_Actinomycetia.o\_\_Actinomycetales.f\_\_Actinomycetaceae

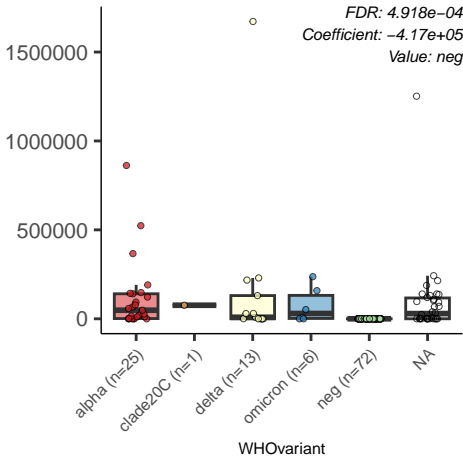

d\_Bacteria.p\_\_Bacteroidetes.c\_\_Bacteroidia.o\_\_Bacteroidales.f\_\_

FDR:  $5.018e-04$   
Coefficient:  $-5.21e+02$   
Value: delta

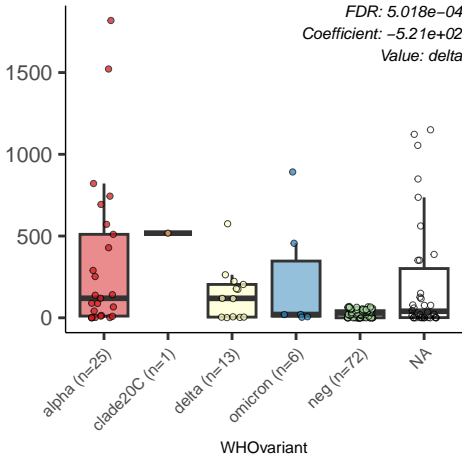

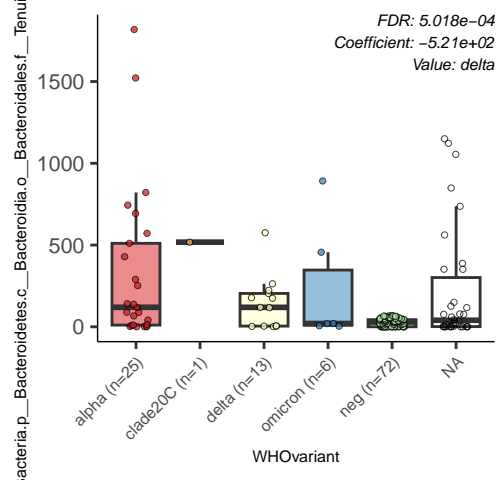

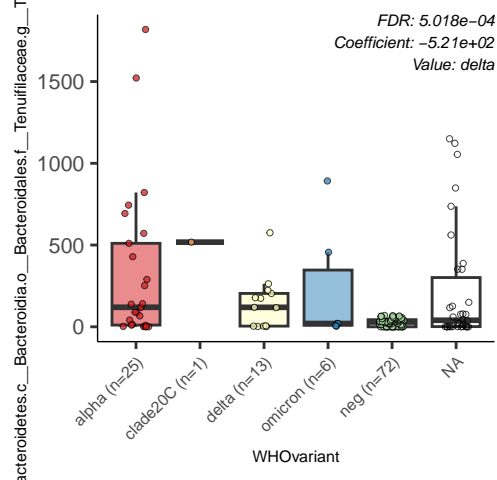

ria.p\_\_Proteobacteria.c\_\_Alphaproteobacteria.o\_\_Rickettsiales.f\_\_C

FDR:  $5.082e-04$   
Coefficient:  $-1.19e+02$   
Value: neg

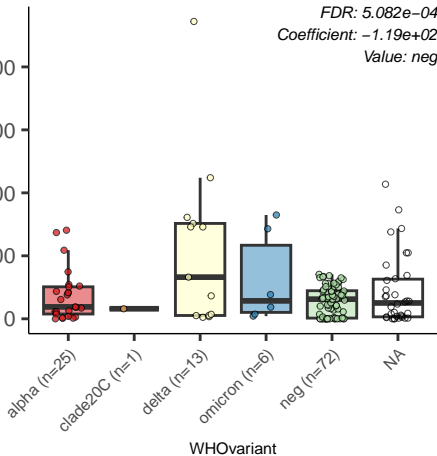

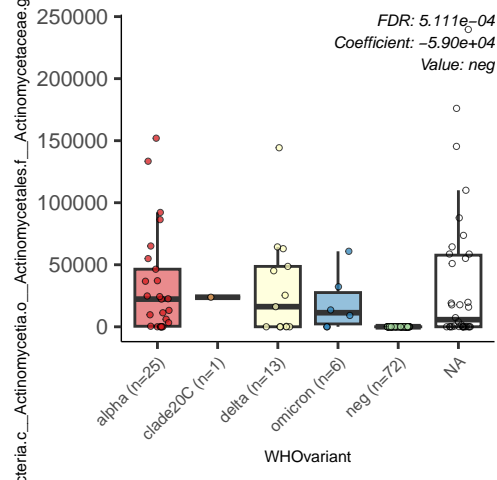

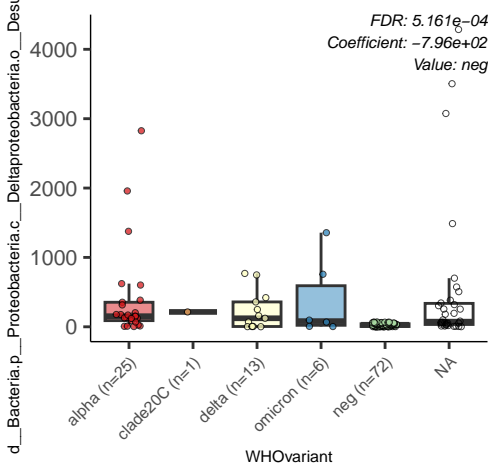



d\_\_Bacteria.p\_\_Bacteroidetes.o\_\_Candidatus.Sulfidibac

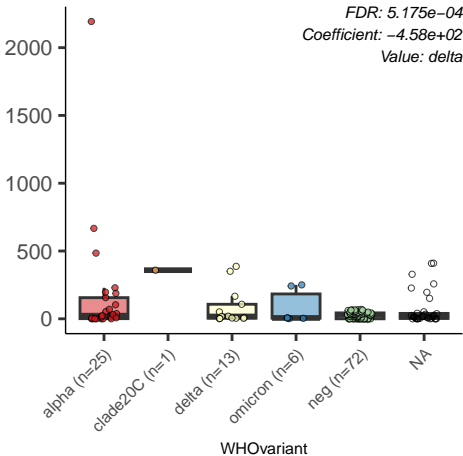

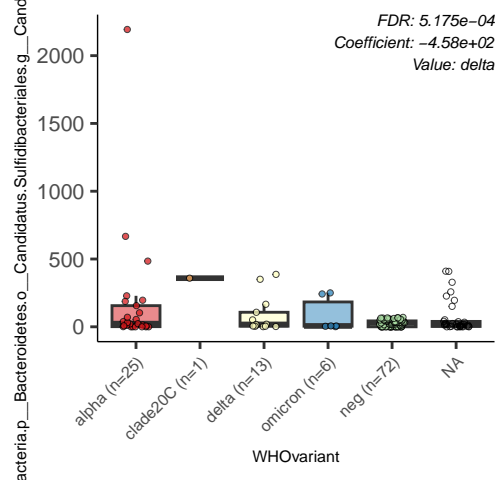

s.o\_\_Candidatus.Sulfidibacteriales.g\_\_Candidatus.Sulfidibacterium.

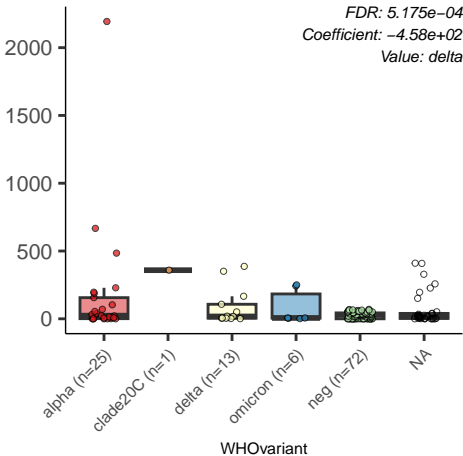

ia.p\_Firmicutes.c\_Bacilli.o\_Bacillales.f\_Bacillaceae.g\_Bacillus

FDR:  $5.208e-04$   
Coefficient:  $-1.30e+02$   
Value: neg

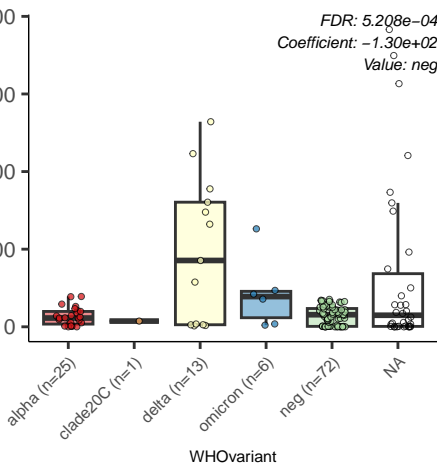

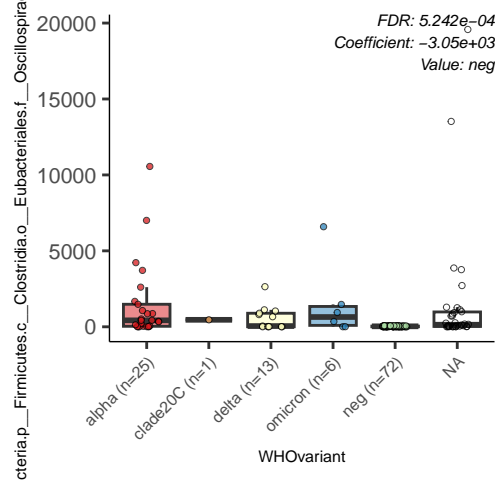

etes.c\_Flavobacteriia.o\_Flavobacteriales.f\_Flavobacteriaceae.g

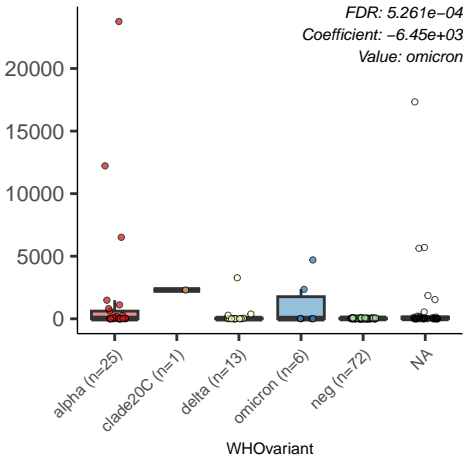

acteria.c\_Actinomycetia.o\_Actinomycetales.f\_Actinomycetaceae.g

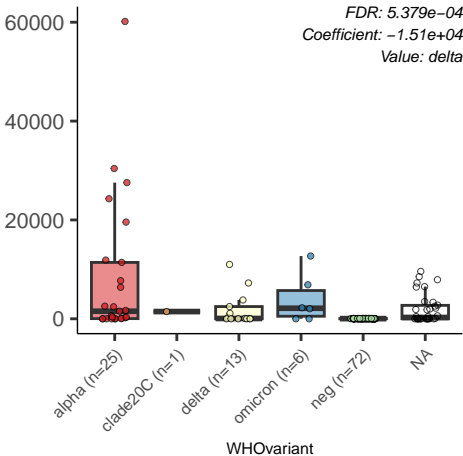

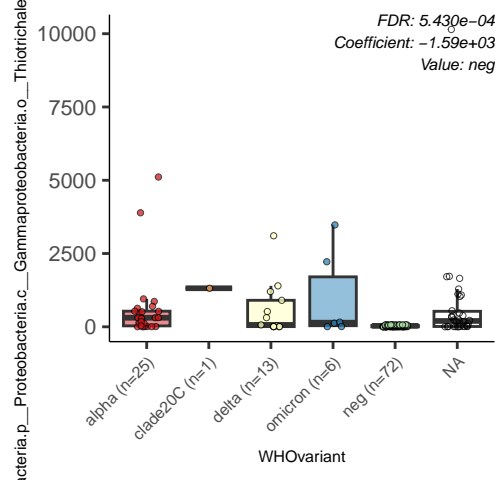



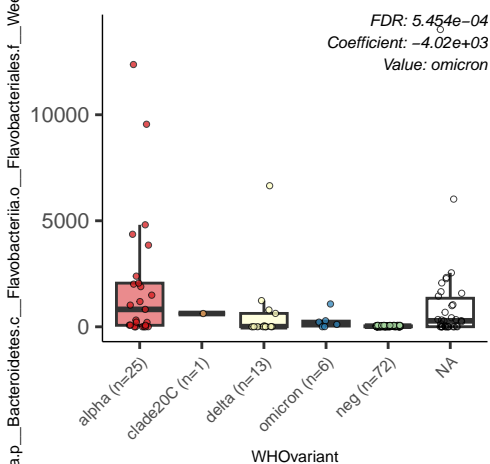

FDR:  $5.454e-04$   
Coefficient:  $-4.02e+03$   
Value: omicron

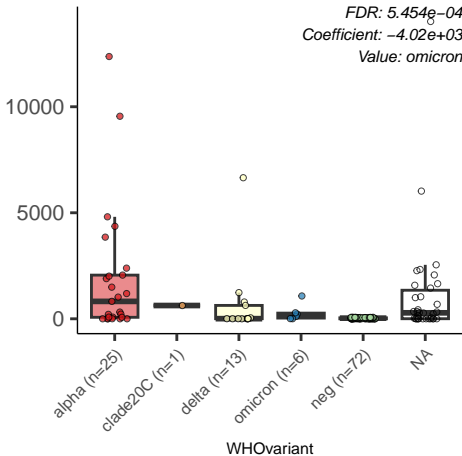

bacteria.p\_Firmicutes.c\_Clostridia.o\_Eubacteriales.f\_Clostridiaceae

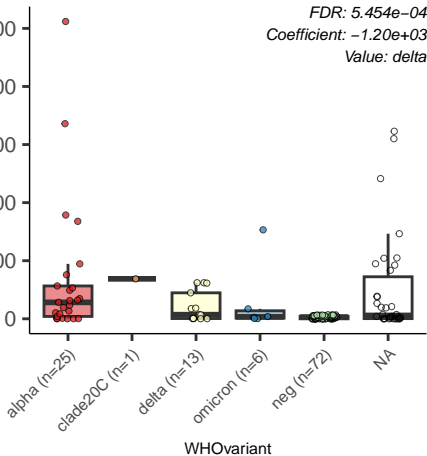

eria.p\_\_Proteobacteria.c\_\_Deltaproteobacteria.o\_\_Desulfovibrionale

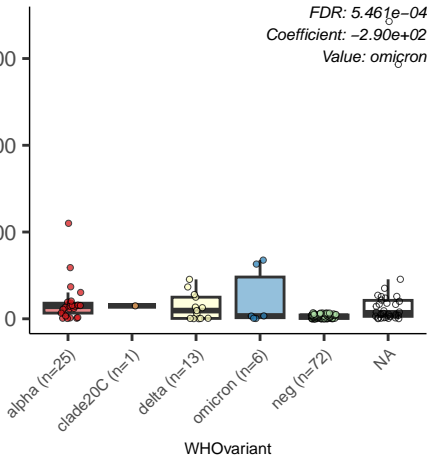

ria.p\_Actinobacteria.c\_Actinomycetia.o\_Micrococcales.f\_Derma

FDR:  $5.571e-04$   
Coefficient:  $-1.14e+03$   
Value: delta

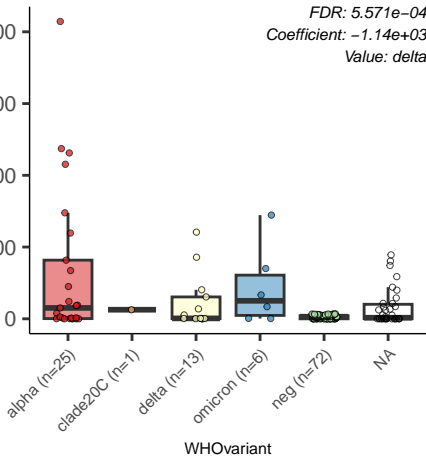

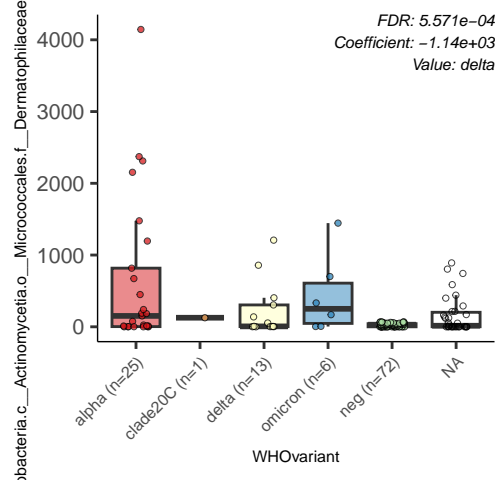

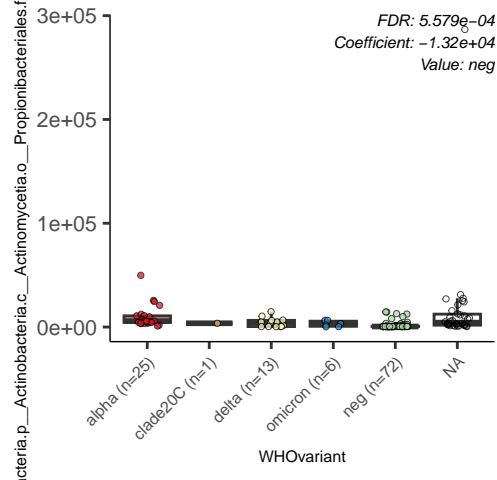

ria.p\_\_Bacteroidetes.c\_\_Flavobacteriia.o\_\_Flavobacteriales.f\_\_Flav

*FDR: 5.580e-04*  
*Coefficient: -1.93e+02*  
*Value: delta*

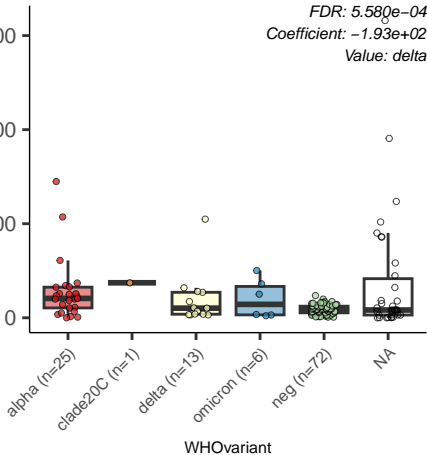



acteroidetes.c\_\_Flavobacteriia.o\_\_Flavobacteriales.f\_\_Flavobacteri

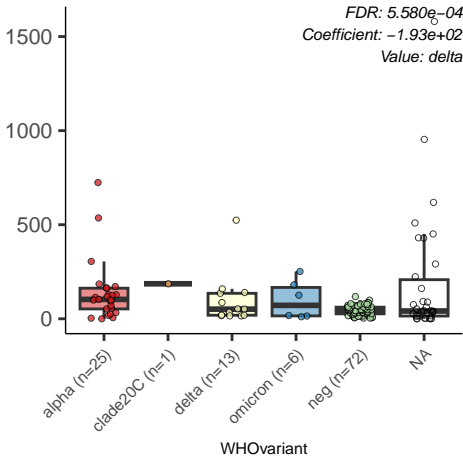

FDR:  $5.683e-04$   
Coefficient:  $1.03e+04$   
Value: delta

1e+05

5e+04

0e+00

alpha (n=25)

clade20C (n=1)

delta (n=13)

omicron (n=6)

neg (n=72)

NA

WHOvariant

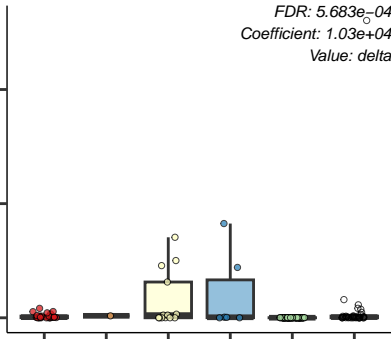

s.c\_\_Bacteroidia.o\_\_Bacteroidales.f\_\_Porphyromonadaceae.g\_\_Po

FDR:  $5.690e-04$   
Coefficient:  $-2.49e+02$   
Value: neg

1000

500

0

alpha (n=25)

clade20C (n=1)

delta (n=13)

omicron (n=6)

neg (n=72)

NA

WHOvariant

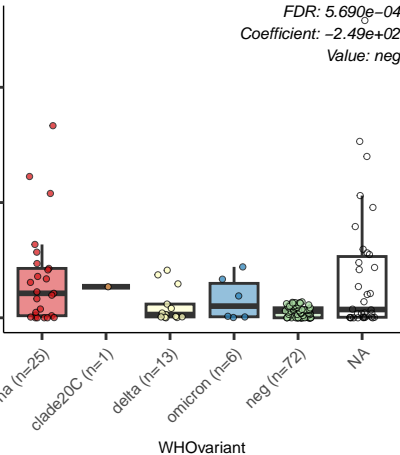

p\_\_Planctomycetes.c\_\_Planctomycetia.o\_\_Planctomycetales.f\_\_Pla

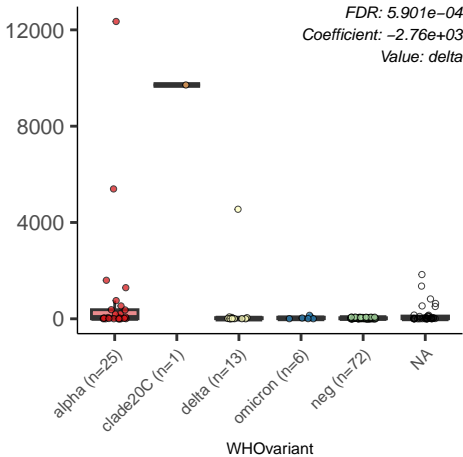

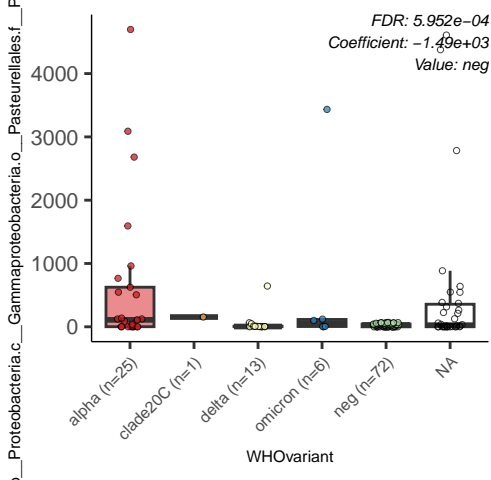

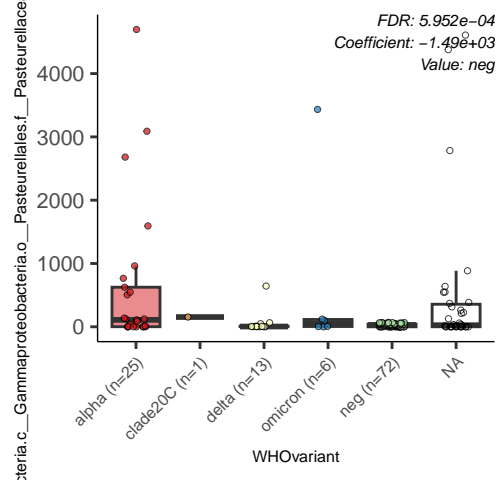

Bacteria.p\_\_Proteobacteria.c\_\_Deltaproteobacteria.o\_\_Myxococca

FDR:  $6.029e-04$   
Coefficient:  $-2.73e+02$   
Value: neg

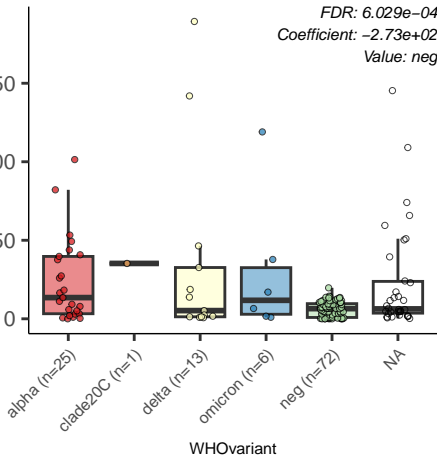

d\_\_Bacteria.p\_\_Proteobacteria.c\_\_Alphaproteobacteria.o\_\_R

FDR:  $6.029 \times 10^{-4}$   
Coefficient:  $-5.76 \times 10^2$   
Value: delta

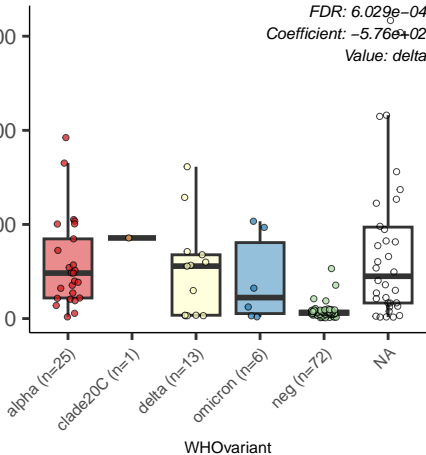



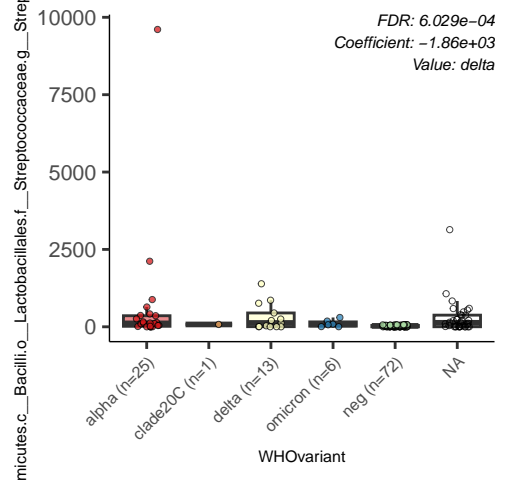

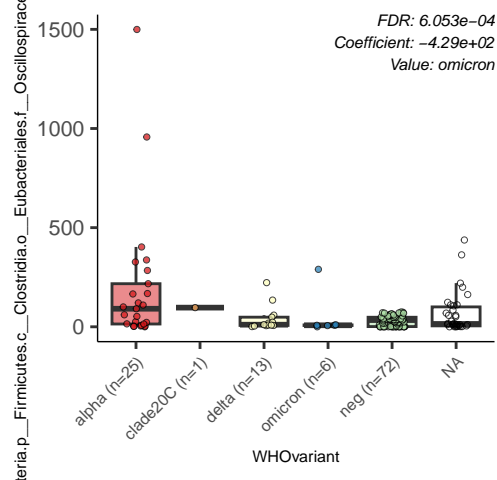

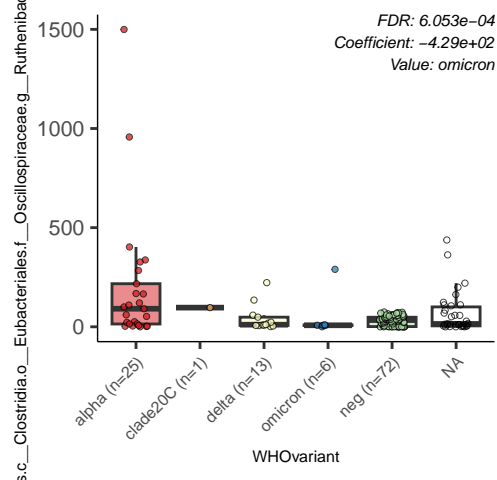





Value: omicron

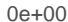

NA

WHOvariant

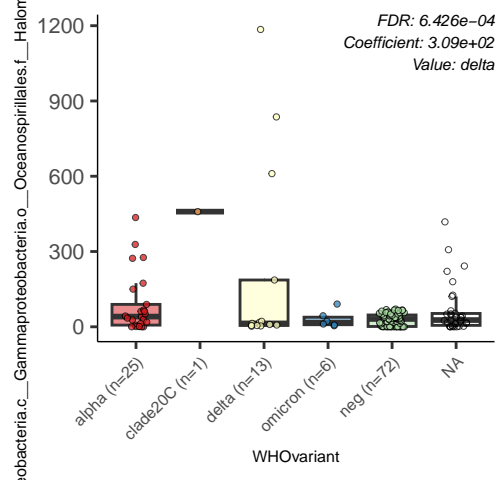

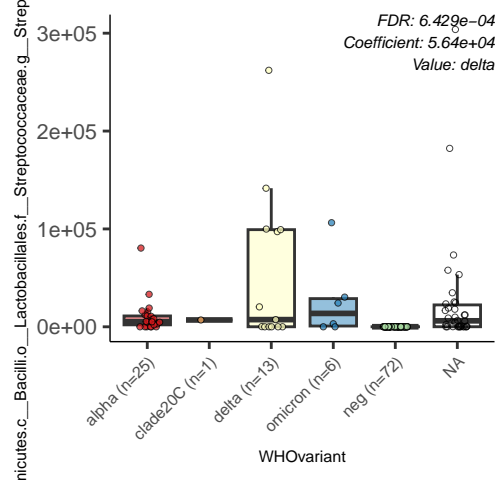



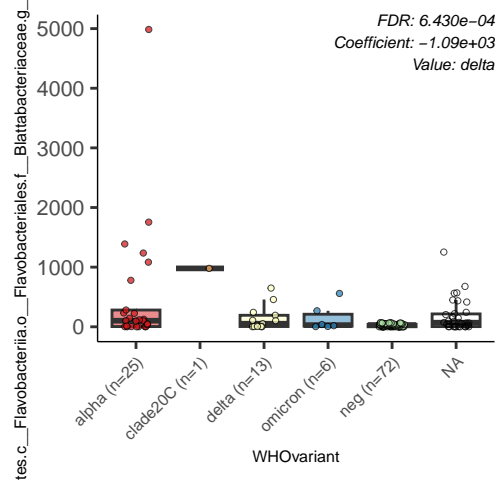

d\_\_Bacteria.p\_\_Verrucomicrobia.c\_\_Verrucomicrobia

FDR:  $6.437e-04$   
Coefficient:  $-6.59e+02$   
Value: delta

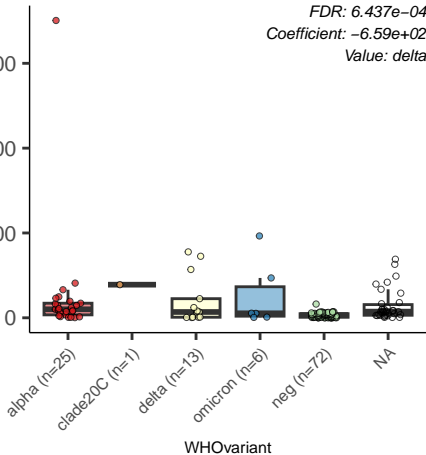

d\_Bacteria.p\_\_Verrucomicrobia.c\_\_Verrucomicrobiae.o\_\_Verru

FDR:  $6.437e-04$   
Coefficient:  $-6.59e+02$   
Value: delta

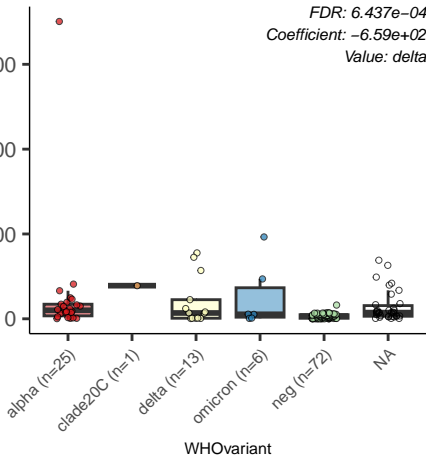

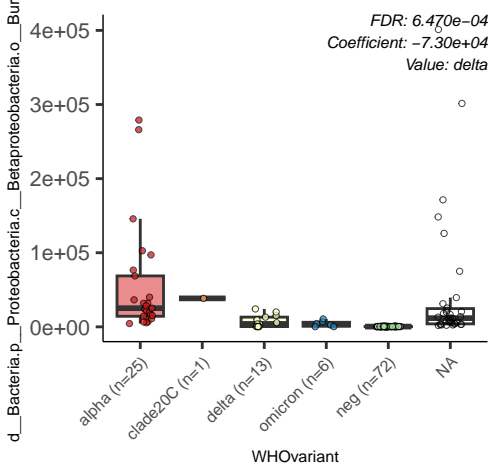

rmicutes.c\_\_Clostridia.o\_\_Eubacteriales.f\_\_Lachnospiraceae.g\_\_Bu

FDR:  $6.479e-04$   
Coefficient:  $-3.76e+03$   
Value: delta

20000

10000

0

alpha (n=25)

clade20C (n=1)

delta (n=13)

omicron (n=6)

neg (n=72)

NA

WHOvariant

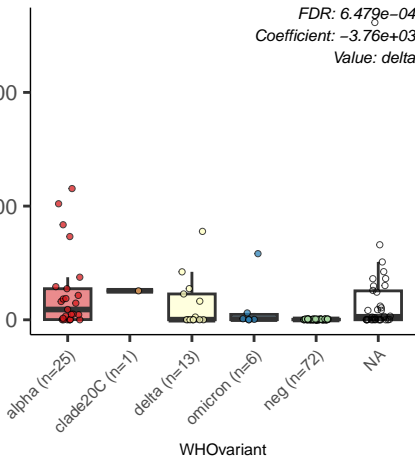

ria.c\_\_Actinomycetia.o\_\_Propionibacteriales.f\_\_Propionibacteriaceae

FDR:  $6.481e-04$   
Coefficient:  $-1.86e+02$   
Value: delta

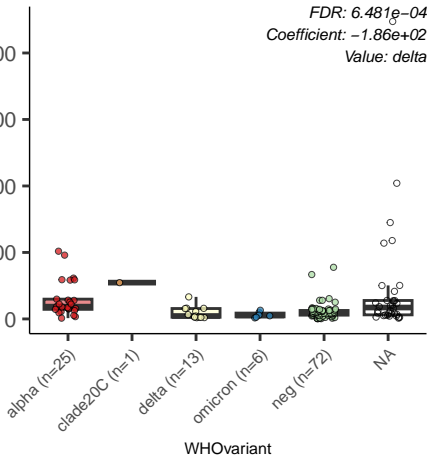

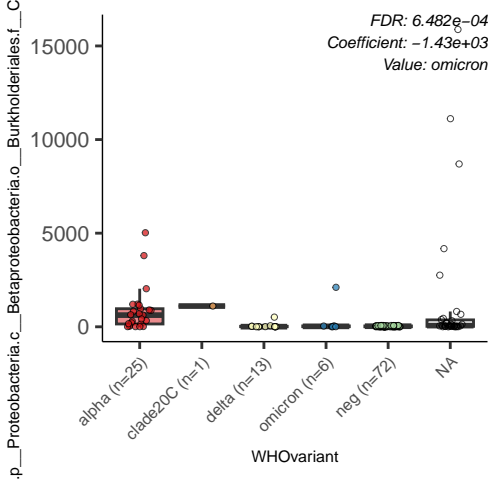

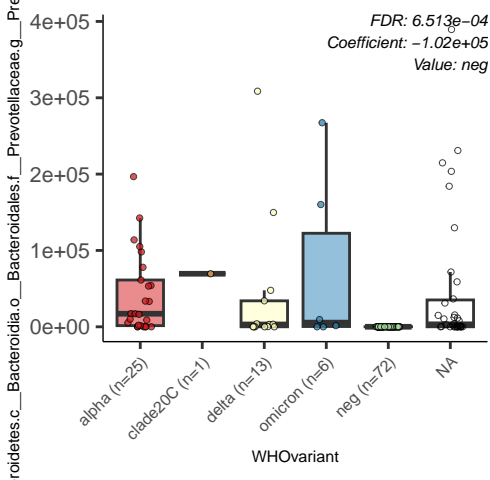



d\_Bacteria.p\_Actinobacteria

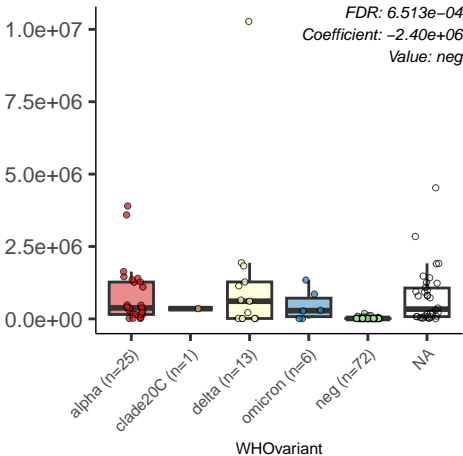

d\_Bacteria.p\_\_Planctomycetes.c\_\_Planctomycetia.o\_\_Pirellulales

FDR:  $6.554e-04$   
Coefficient:  $-7.66e+02$   
Value: neg

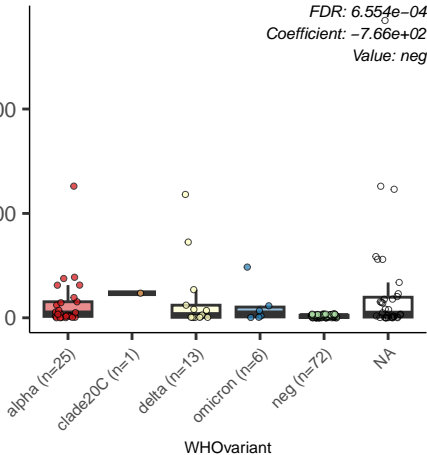

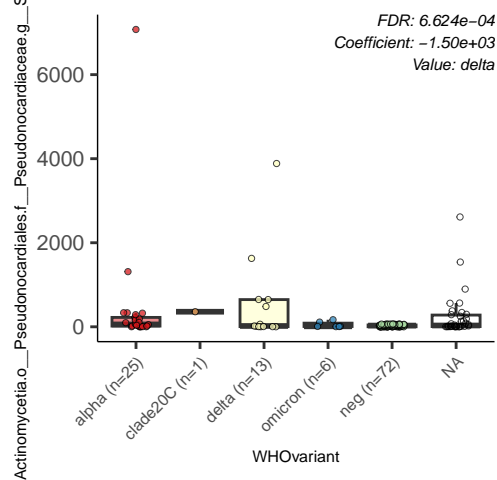

bacteria.p\_\_Proteobacteria.c\_\_Alphaproteobacteria.o\_\_Hyphomicro

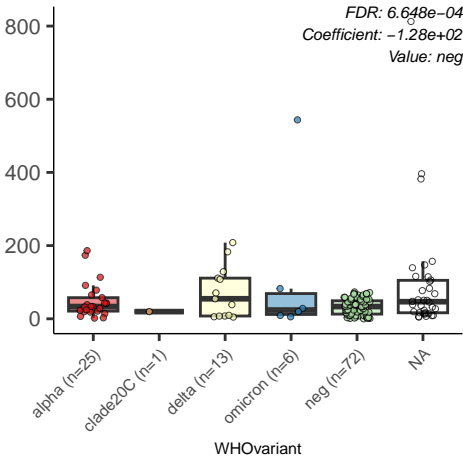

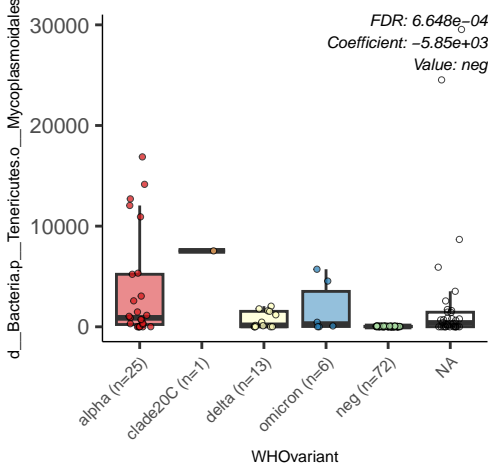

einococcus.Thermus.c\_Deinococci.o\_Thermales.f\_Thermaceae

FDR:  $6.659e-04$   
Coefficient:  $-6.99e+02$   
Value: neg

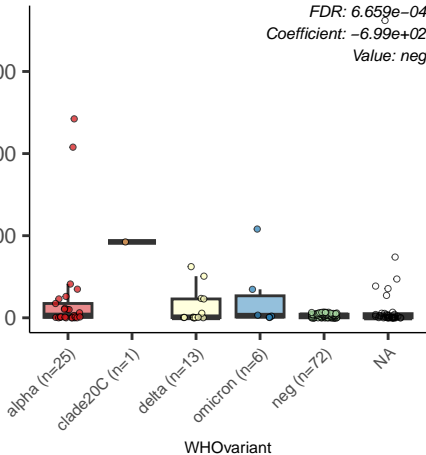

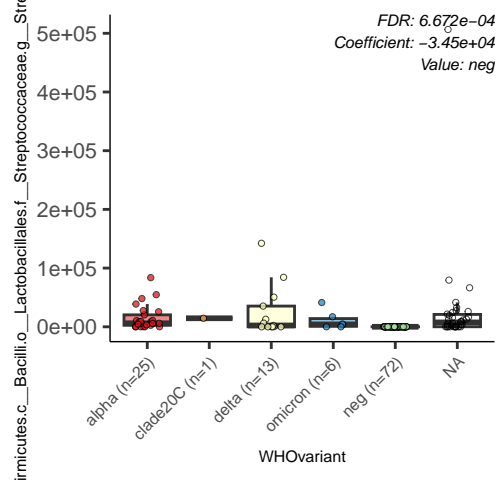

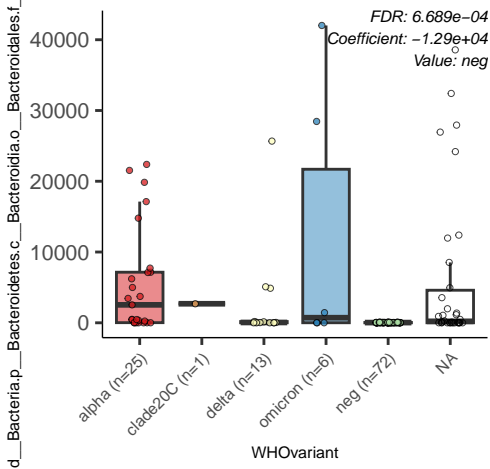



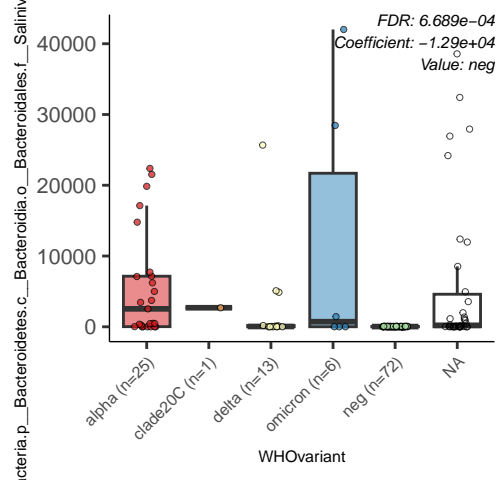

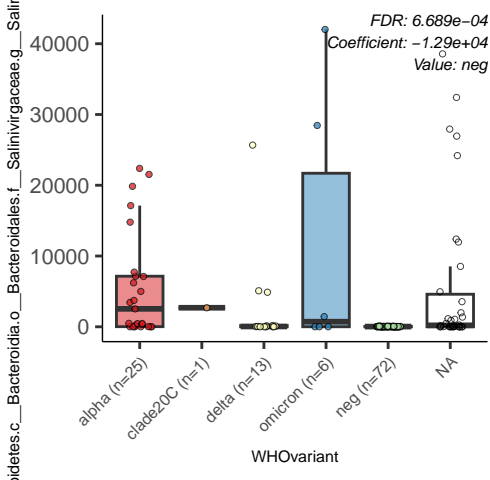

p\_\_Bacteroidetes.c\_\_Chitinophagia.o\_\_Chitinophagales.f\_\_Chitinop

FDR:  $6.746e-04$   
Coefficient:  $-6.77e+02$   
Value: omicron

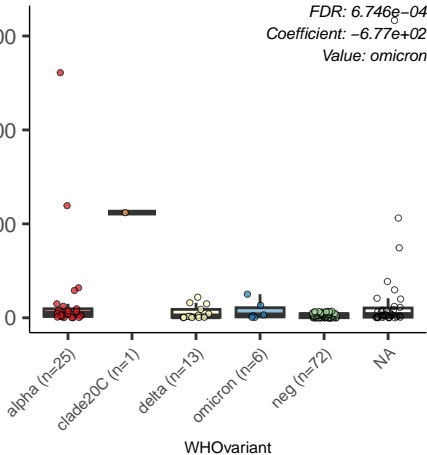

\_\_Bacteria.p\_\_Fusobacteria.c\_\_Fusobacteriia.o\_\_Fusobacteriales.f

*FDR: 6.863e-04*  
*Coefficient: -3.45e+05*  
*Value: delta*

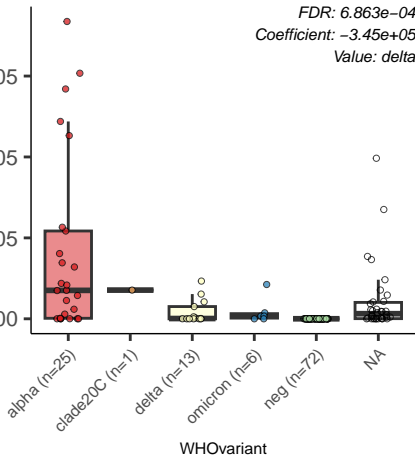

d\_Bacteria.p\_\_Spirochaetes.c\_\_Spirochaetia.o\_\_Spirochaetales.f

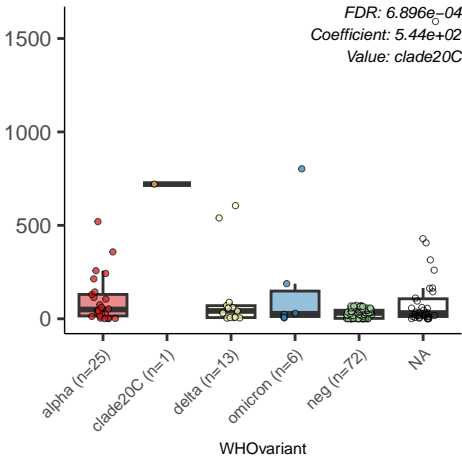

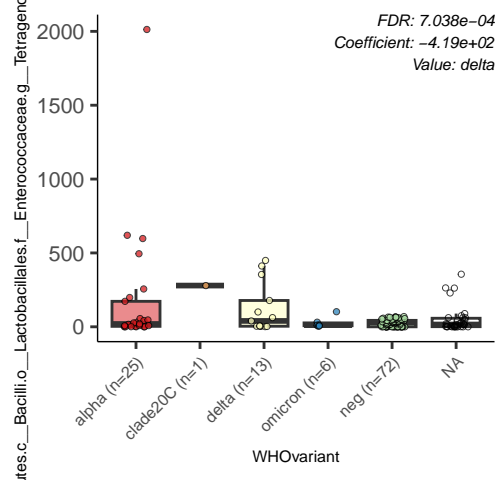

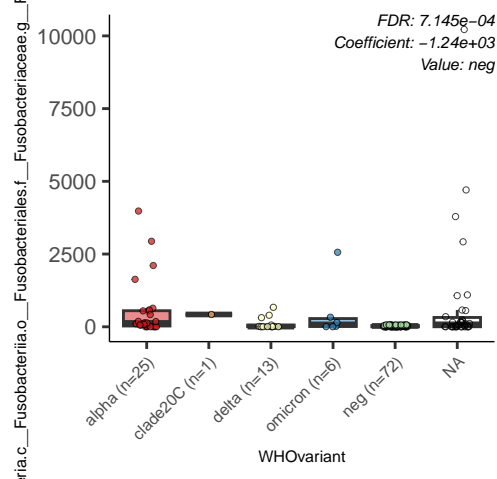

eria.p\_\_Firmicutes.c\_\_Bacilli.o\_\_Bacillales.f\_\_Bacillaceae.g\_\_Bacil

FDR:  $7.286e-04$   
Coefficient:  $-9.75e+02$   
Value: neg

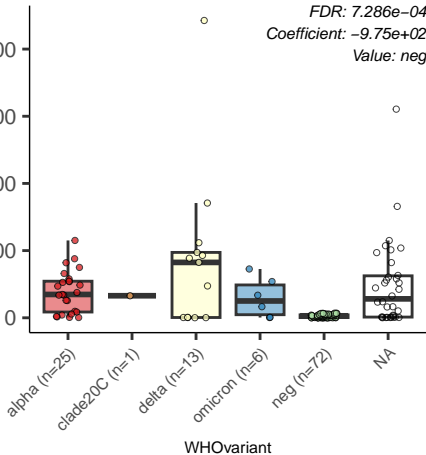



p\_Firmicutes.c\_\_Erysipelotrichia.o\_\_Erysipelotrichales.f\_\_Erysipe

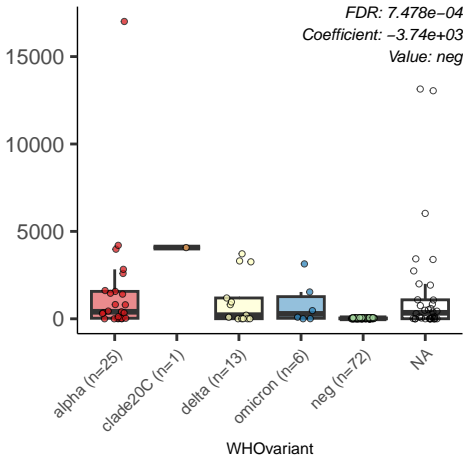

Firmicutes.c\_\_Clostridia.o\_\_Eubacteriales.f\_\_Clostridiaceae.g\_\_Clo

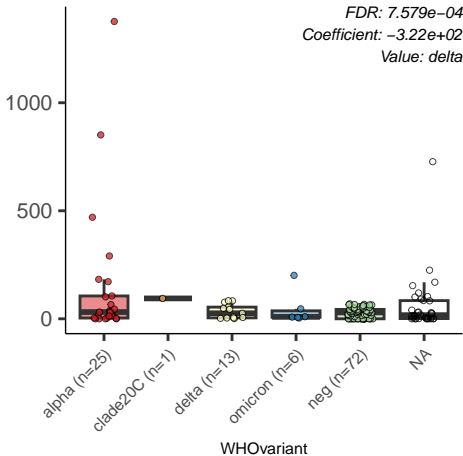

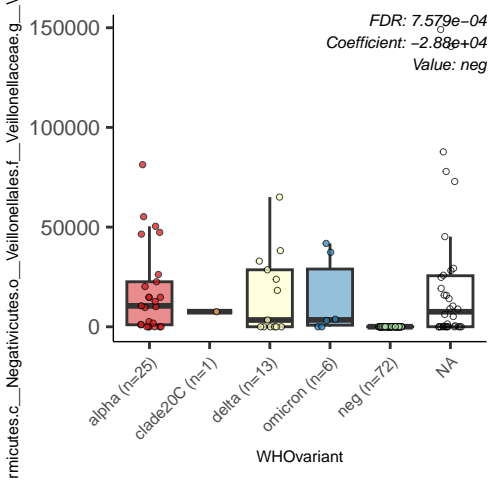

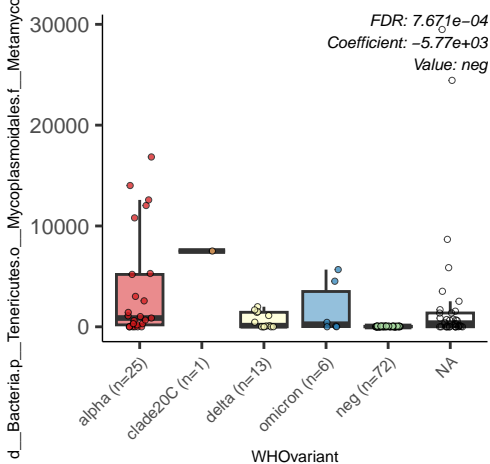

eria.p\_\_Tenericutes.o\_\_Mycoplasmoidales.f\_\_Metamycoplasmatac

FDR:  $7.671e-04$   
Coefficient:  $-5.77e+03$   
Value: neg

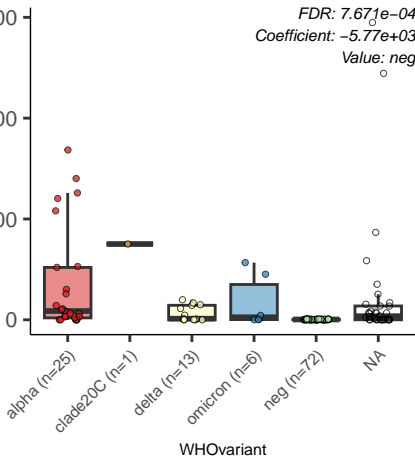

Actinobacteria.c\_\_Actinomycetia.o\_\_Pseudonocardiales.f\_\_Pseudono

FDR:  $7.707e-04$   
Coefficient:  $-1.50e+03$   
Value: delta

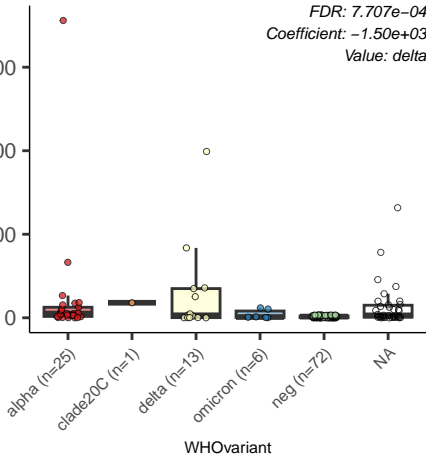

omyces.c\_\_Planctomycetia.o\_\_Planctomycetales.f\_\_Planctomycet

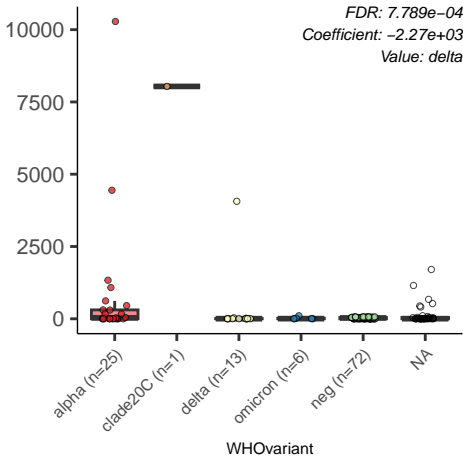

micutes.c\_\_Clostridia.o\_\_Thermoanaerobacterales.f\_\_Thermoanaer

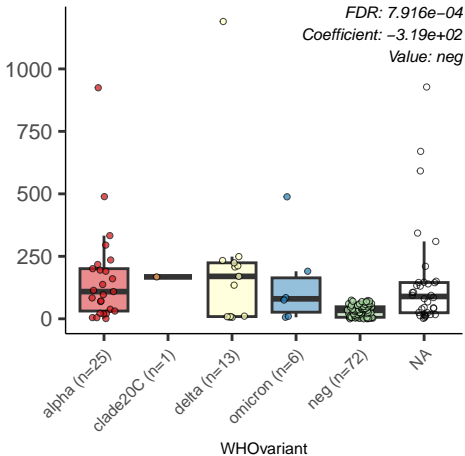



bacteria.p\_\_Proteobacteria.c\_\_Gammaproteobacteria.o\_\_Chromat

*FDR: 7.951e-04*  
*Coefficient: -1.97e+02*  
*Value: neg*

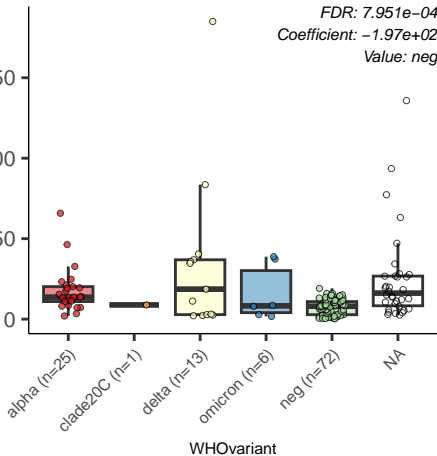

d\_\_Bacteria.p\_\_Cyanobacteria.c\_\_Gloeobacteria

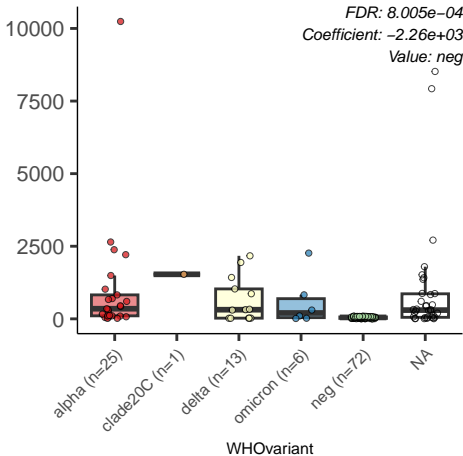

d\_\_Bacteria.p\_\_Cyanobacteria.c\_\_Gloeobacteria.o\_\_Gloeobacter

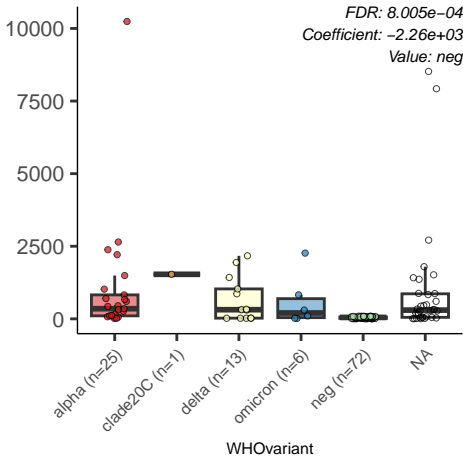

Bacteria.p\_\_Cyanobacteria.c\_\_Gloeobacteria.o\_\_Gloeobacterales.f.

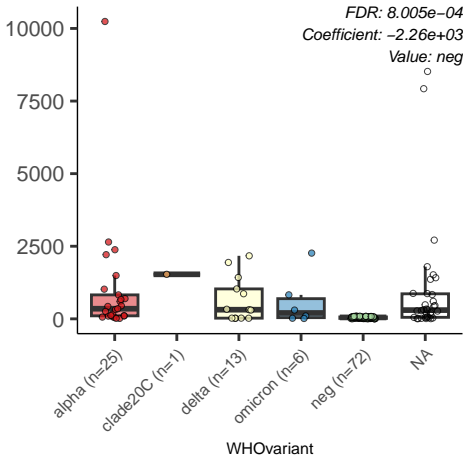

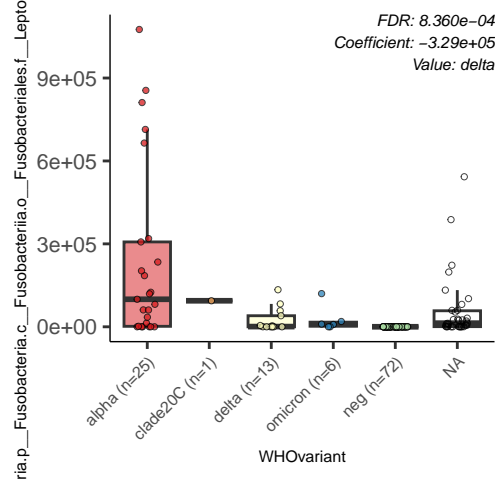

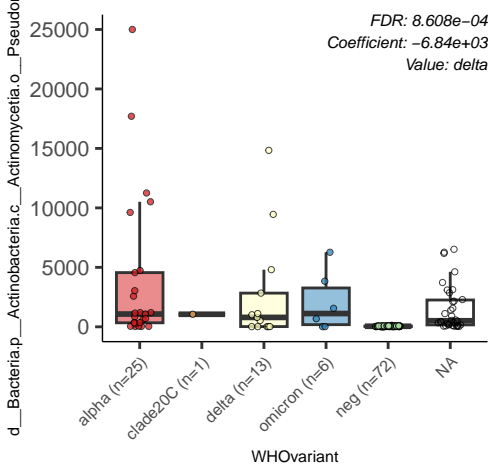

acteria.p\_Actinobacteria.c\_Actinomycetia.o\_Pseudonocardiales.f

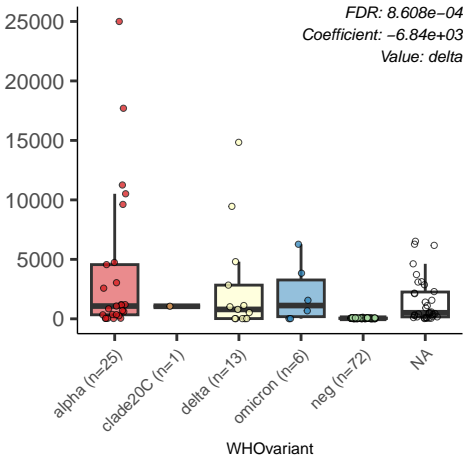

d\_Bacteria.p\_\_Proteobacteria.c\_\_Alphaproteobacte

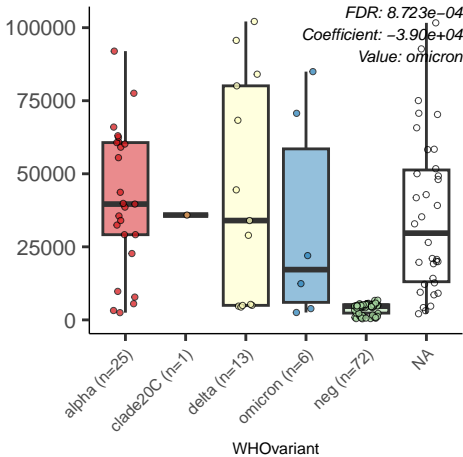



ria.c\_\_Fusobacteriia.o\_\_Fusobacteriales.f\_\_Fusobacteriaceae.g\_\_F

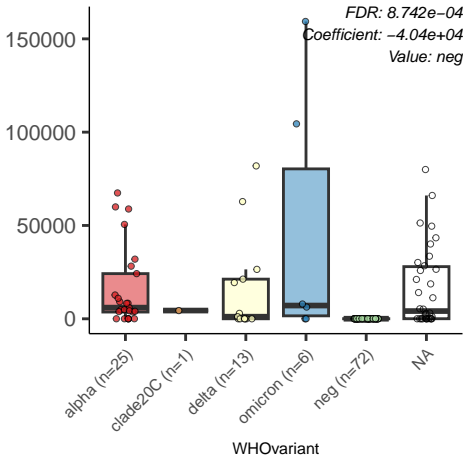

d\_Bacteria.p\_\_Planctomycetes.c\_\_Planctomycetia.o\_\_Plancto

FDR:  $8.908e-04$   
Coefficient:  $-2.83e+03$   
Value: delta

10000

5000

0

alpha (n=25)

clade20C (n=1)

delta (n=13)

omicron (n=6)

neg (n=72)

NA

WHOvariant

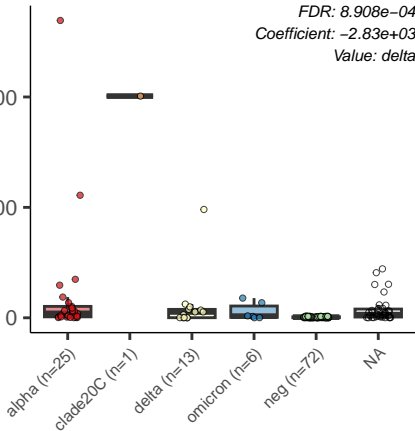

bacteria.p\_\_Planctomycetes.c\_\_Planctomycetia.o\_\_Planctomycetales

FDR:  $8.908e-04$   
Coefficient:  $-2.83e+03$   
Value: delta

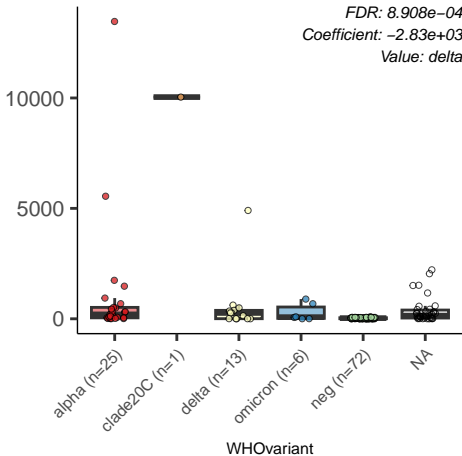

ia.p\_Actinobacteria.c\_Actinomycetia.o\_Micrococcales.f\_Microb

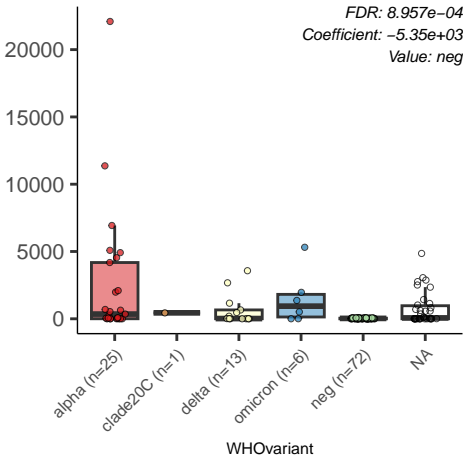

bacteria.c\_Actinomycetia.o\_Micrococcales.f\_Microbacteriaceae.g

FDR:  $8.986e-04$   
Coefficient:  $-5.35e+03$   
Value: neg

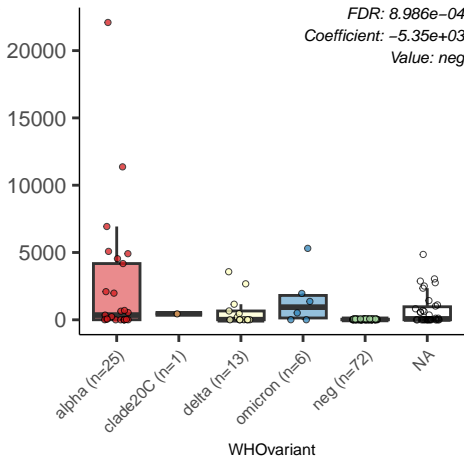

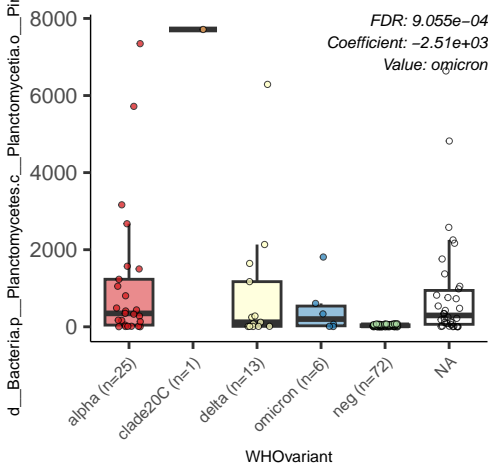

d\_Bacteria.p\_Aquificae

FDR:  $9.111e-04$

Coefficient:  $-5.86e+02$

Value: neg

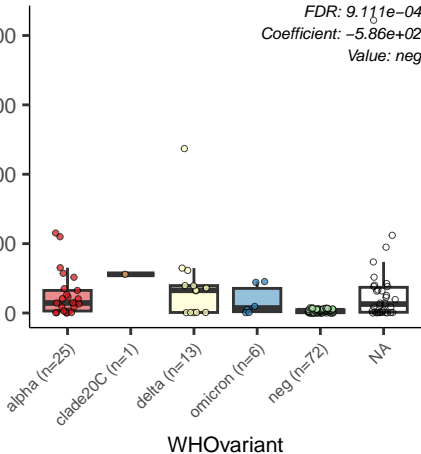

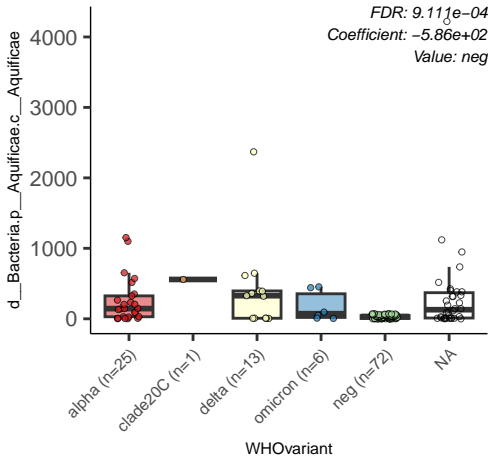



cutescutes.c\_\_Bacilli.o\_\_Lactobacillales.f\_\_Streptococcaceae.g\_\_Strepto

FDR:  $9.156e-04$   
Coefficient:  $-9.23e+01$   
Value: neg

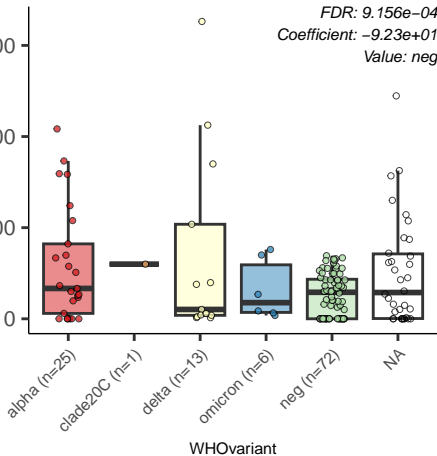

FDR:  $9.258e-04$   
Coefficient:  $-2.11e+03$   
Value: omicron

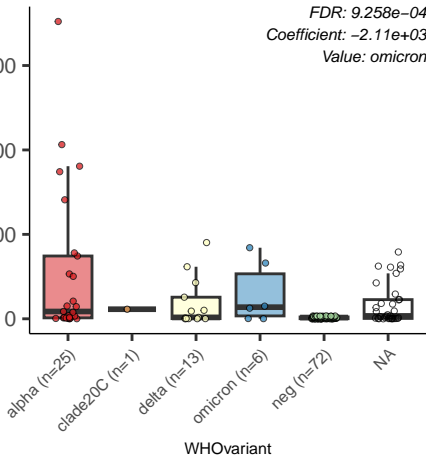

FDR:  $9.258e-04$   
Coefficient:  $-2.11e+03$   
Value: omicron

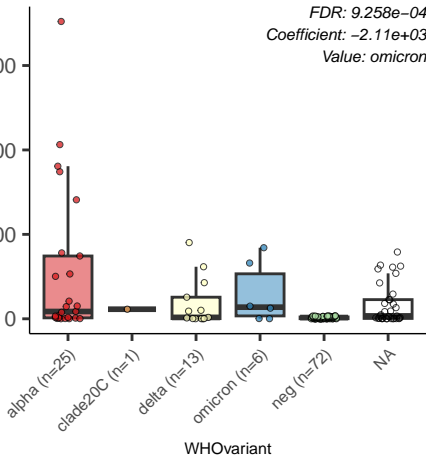

d\_Bacteria.p\_Cyanobacteria.o\_Oscillatoriales.f\_Microo

FDR:  $9.270e-04$   
Coefficient:  $-3.80e+02$   
Value: delta

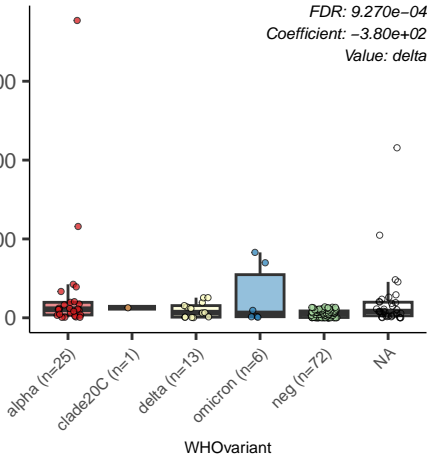

rmicutes.c\_\_Clostridia.o\_\_Eubacteriales.f\_\_Lachnospiraceae.g\_\_Bu

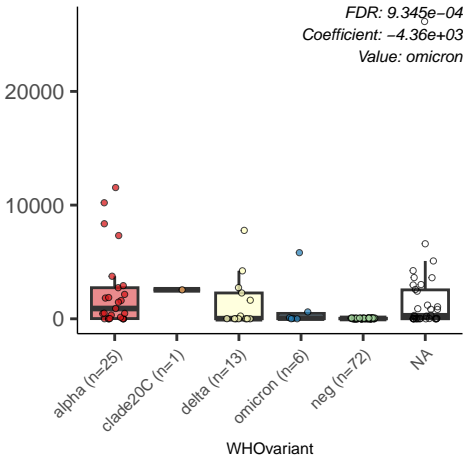

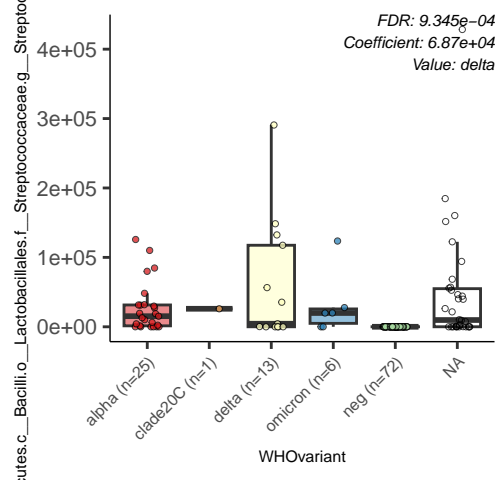

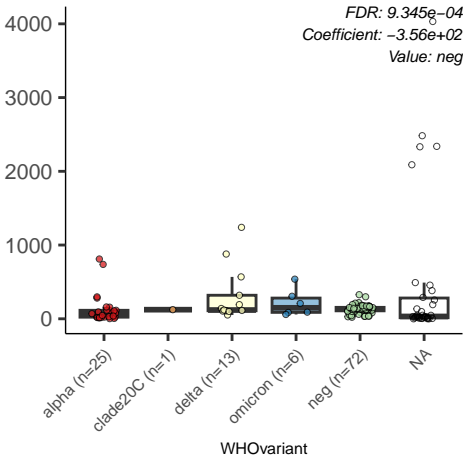

acteroidetes.c\_\_Bacteroidia.o\_\_Bacteroidales.f\_\_Prevotellaceae.g

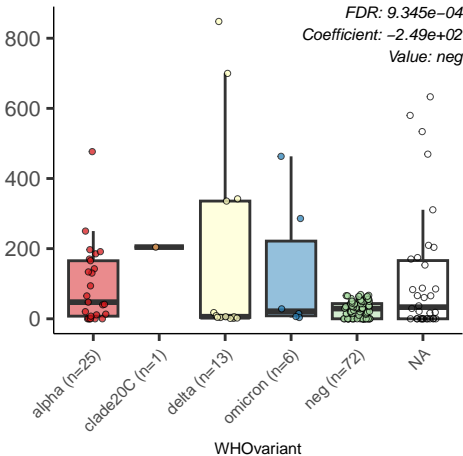



bacteria.c\_Actinomycetia.o\_Actinomycetales.f\_Actinomycetaceae

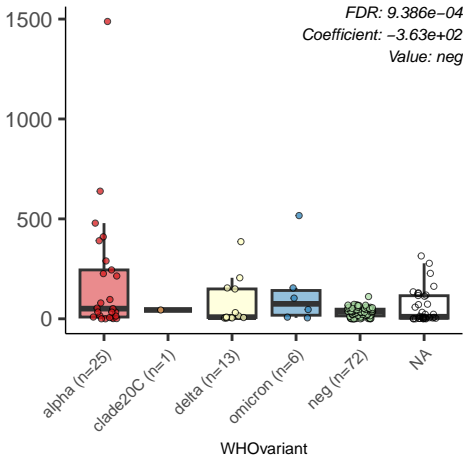

Bacteria.p\_\_Bacteroidetes.c\_\_Flavobacteriia.o\_\_Flavobacteriales

FDR:  $9.481e-04$   
Coefficient:  $-2.18e+04$   
Value: omicron

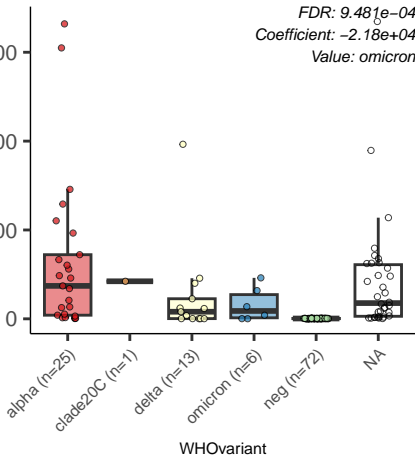

es.c\_\_Spirochaetia.o\_\_Spirochaetales.f\_\_Treponemataceae.g\_\_Tre

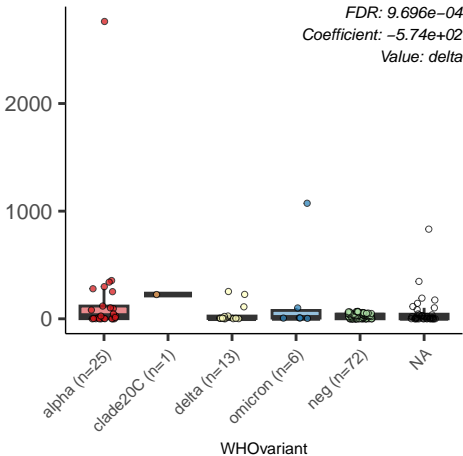

eria.p\_\_Firmicutes.c\_\_Clostridia.o\_\_Eubacteriales.f\_\_Oscillospira

FDR:  $1.004e-03$   
Coefficient:  $-9.31e+02$   
Value: delta

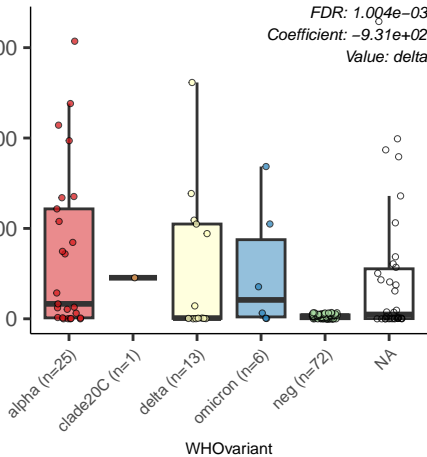

d\_Bacteria.p\_Firmicutes.c\_Bacilli.o\_Bacillales.f\_Bacillaceae

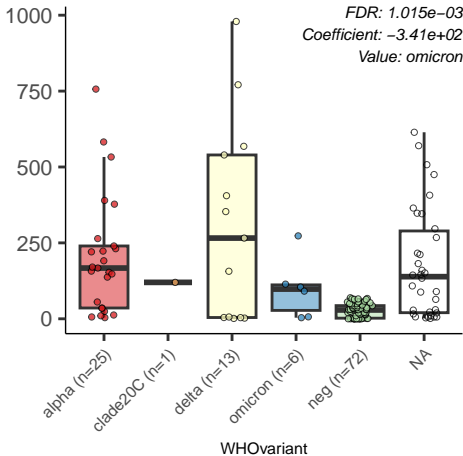

tertia.c\_\_Actinomycetia.o\_\_Actinomycetales.f\_\_Actinomycetaceae.g

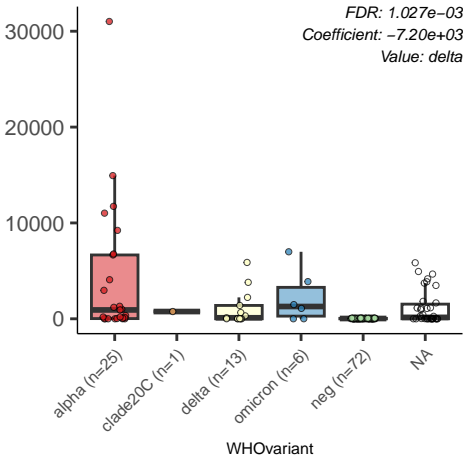

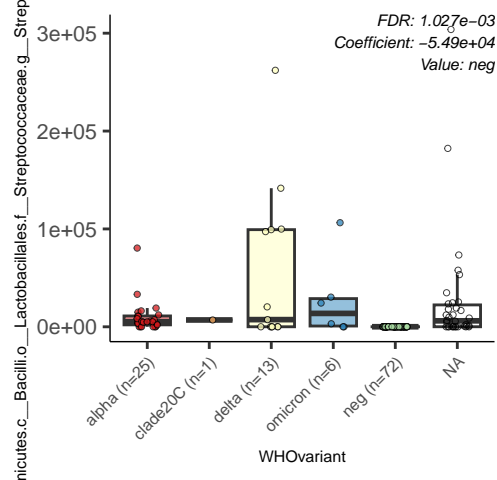

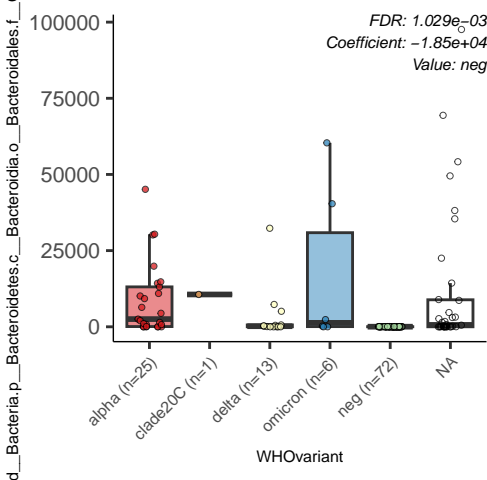



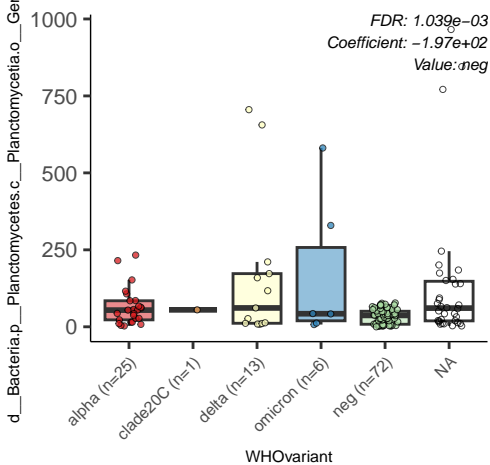

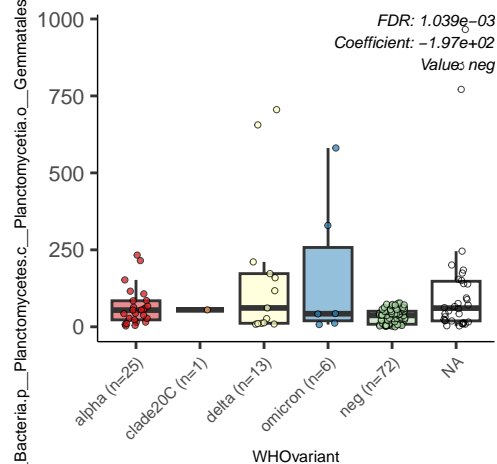

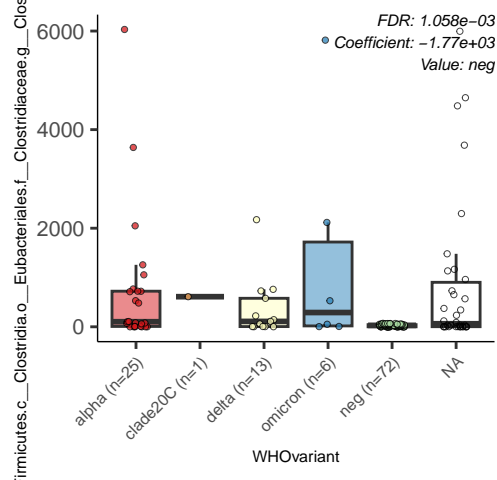

FDR:  $1.076e-03$   
Coefficient:  $-3.12e+02$   
Value: omicron

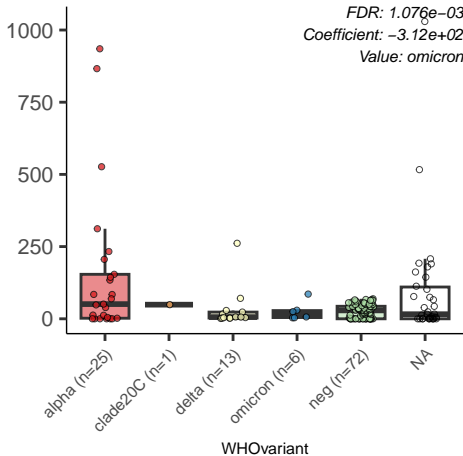

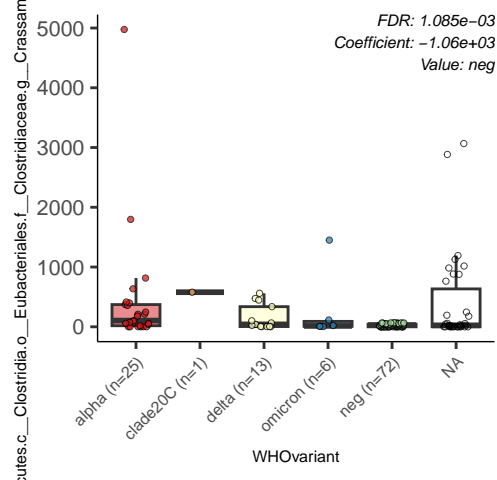

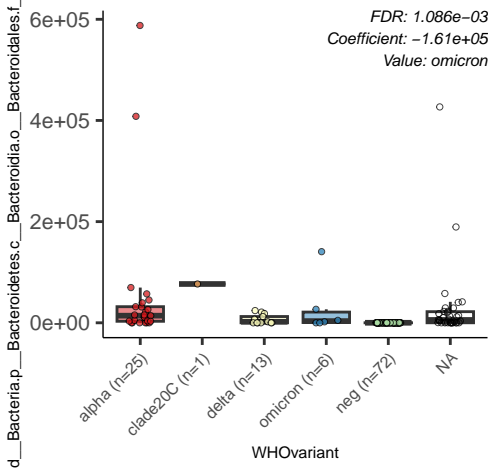

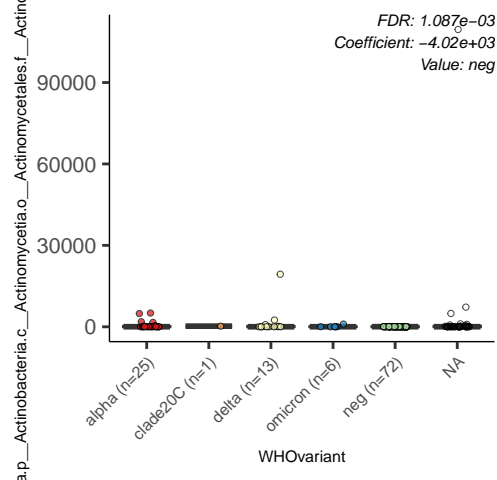

bacteria.c\_Actinomycetia.o\_Actinomycetales.f\_Actinomycetaceae

FDR:  $1.087e-03$   
Coefficient:  $-4.02e+03$   
Value: neg

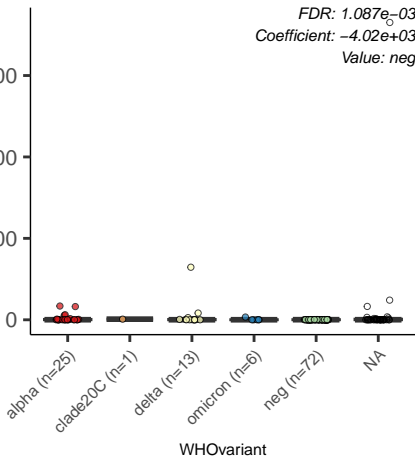



charimonadia.o\_\_Candidatus.Nanosynbacterales.f\_\_Candidatus.Na

FDR:  $1.098e-03$   
Coefficient:  $-3.04e+04$   
Value: omicron

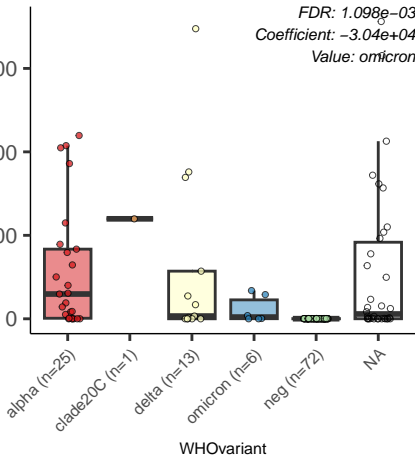

eria.p\_\_Bacteroidetes.c\_\_Cytophagia.o\_\_Cytophagales.f\_\_Spirosor

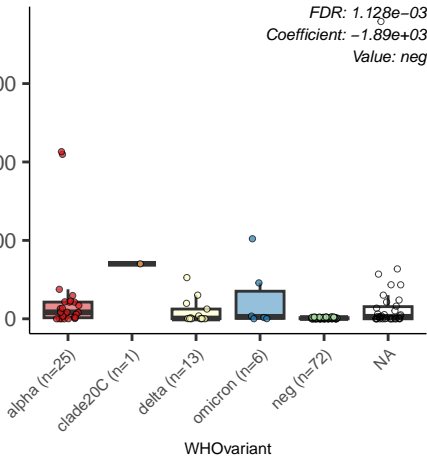

bidetes.c\_\_Cytophagia.o\_\_Cytophagales.f\_\_Spirosomaceae.g\_\_Lea

FDR:  $1.128e-03$   
Coefficient:  $-1.89e+03$   
Value: neg

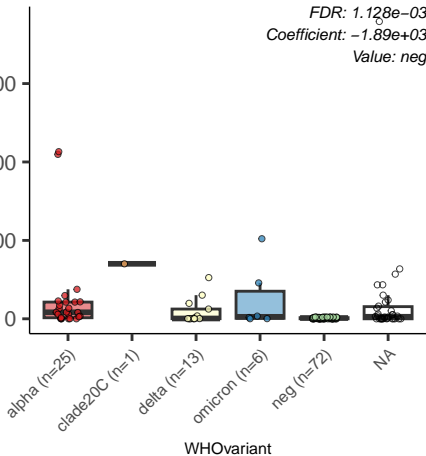

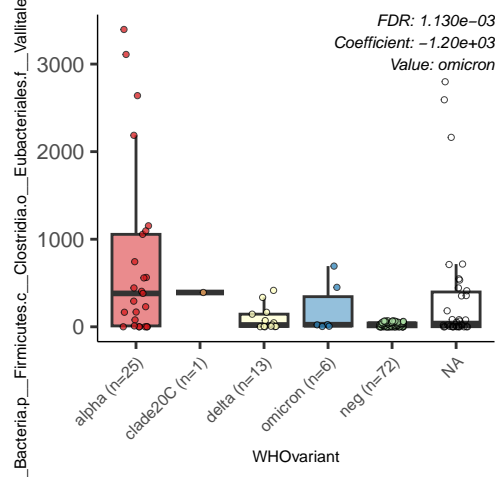

cteria.c\_\_Acidobacteriia.o\_\_Acidobacteriales.f\_\_Acidobacteriaceae.

FDR:  $1.144e-03$   
Coefficient:  $-9.37e+02$   
Value: omicron

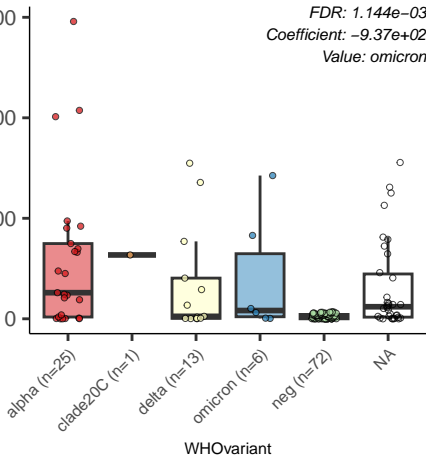

ria.p\_\_Proteobacteria.c\_\_Alphaproteobacteria.o\_\_Rickettsiales.f\_\_R

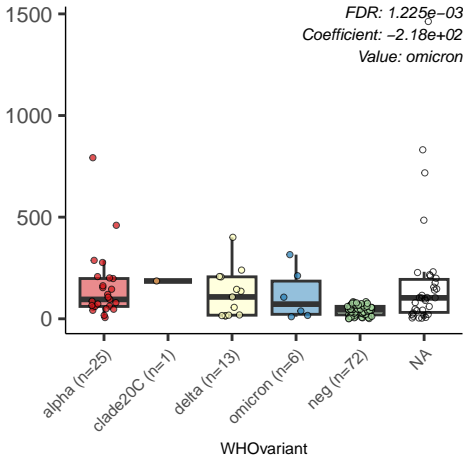

ctinobacteria.c\_\_Actinomycetia.o\_\_Micrococcales.f\_\_Micrococcace

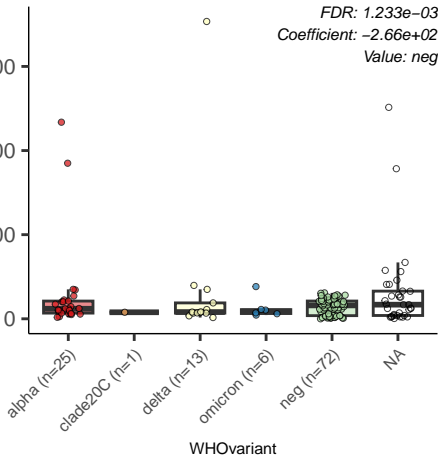

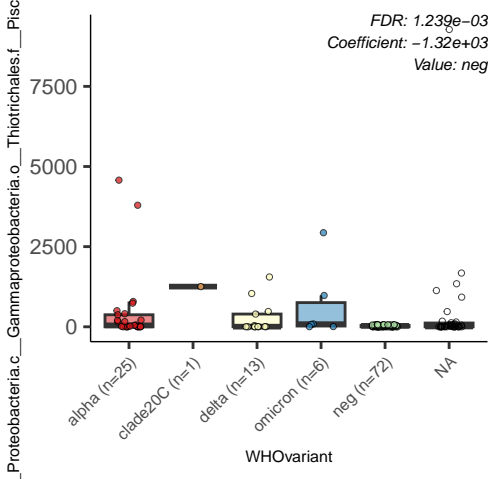



Firmicutes.c\_\_Clostridia.o\_\_Eubacteriales.f\_\_Clostridiaceae.g\_\_Clo

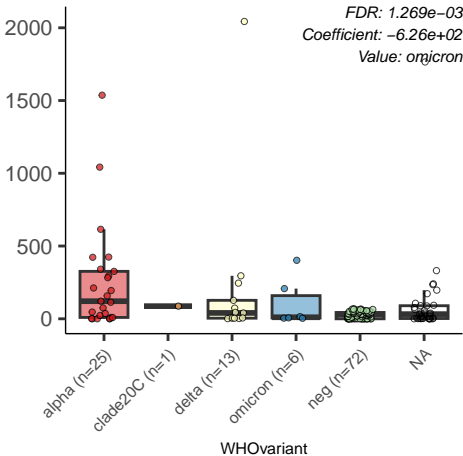

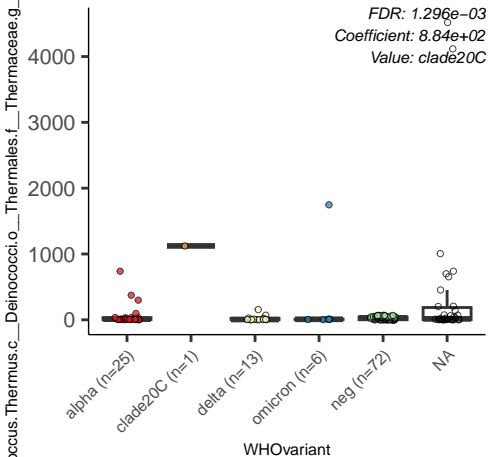

ria.p\_\_Proteobacteria.c\_\_Betaproteobacteria.o\_\_Burkholderiales.g

FDR:  $1.301e-03$   
Coefficient:  $-1.02e+02$   
Value: omicron

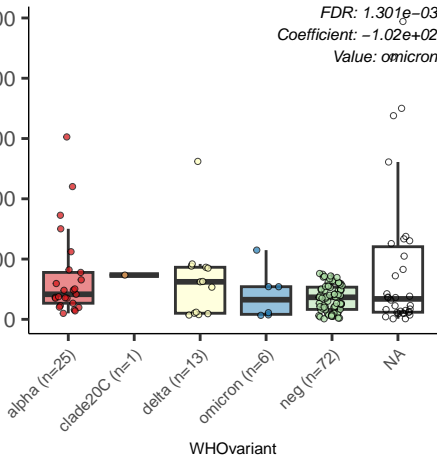

ia.c\_\_Betaproteobacteria.o\_\_Burkholderiales.g\_\_Candidatus.Lichthy

FDR:  $1.301e-03$   
Coefficient:  $-1.02e+02$   
Value: omicron

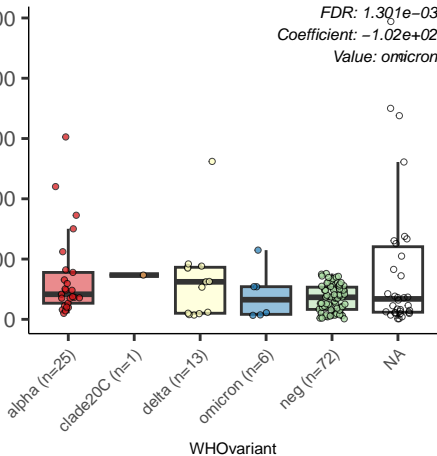

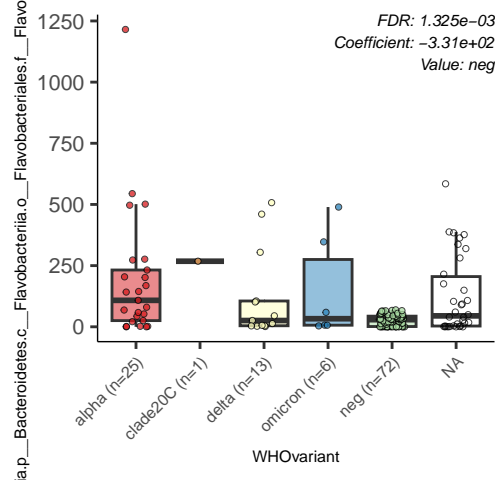

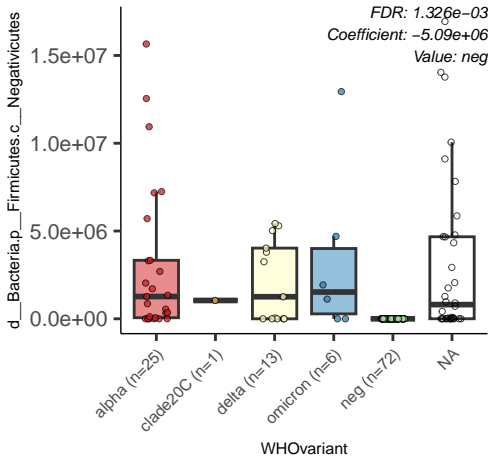

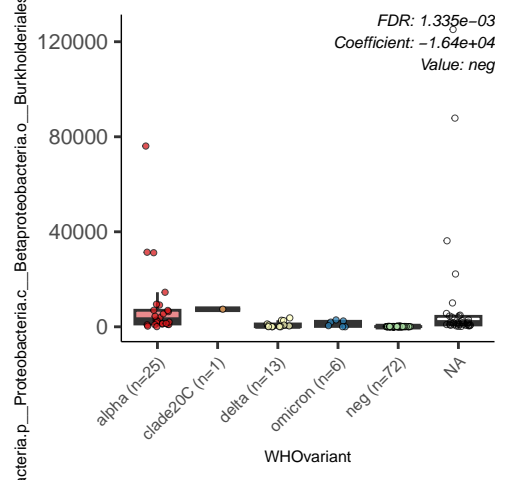

\_Bacteria.p\_\_Proteobacteria.c\_\_Alphaproteobacteria.o\_\_Rickettsia

*FDR: 1.340e-03*  
*Coefficient: -2.27e+02*  
*Value: omicron*

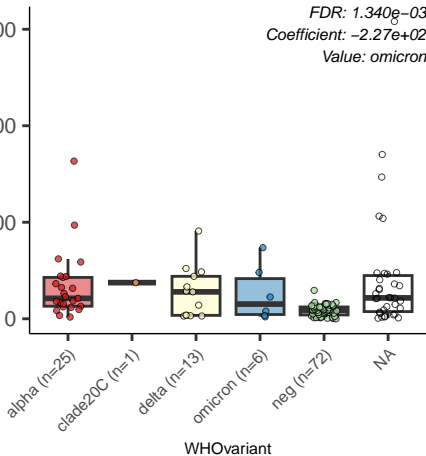



icutes.c\_\_Bacilli.o\_\_Lactobacillales.f\_\_Streptococcaceae.g\_\_Strept

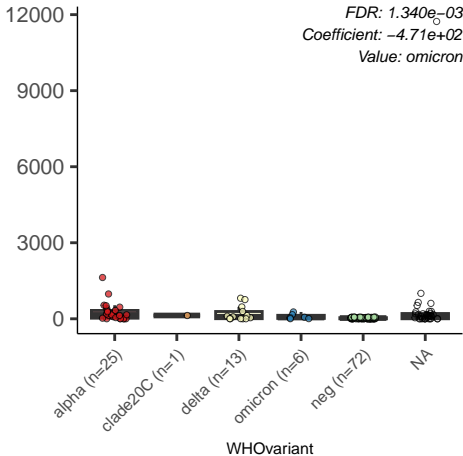

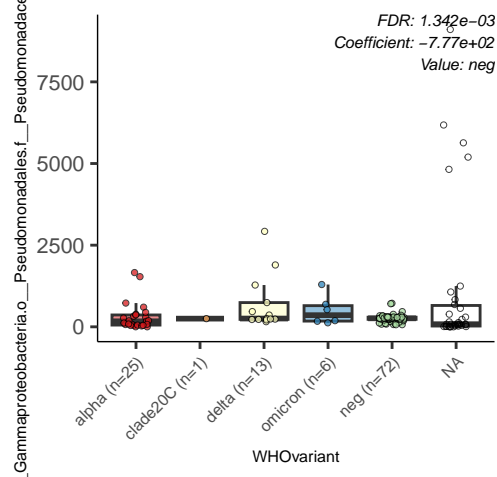

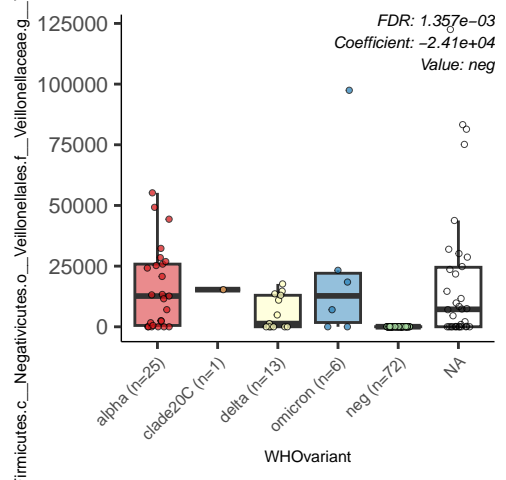

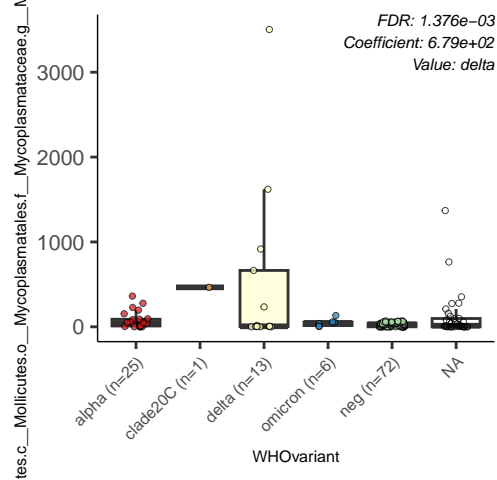

NA

FDR: 1.409e-03  
Coefficient: -2.61e+03  
Value: delta

FDR:  $1.458e-03$   
Coefficient:  $-1.91e+02$   
Value: omicron

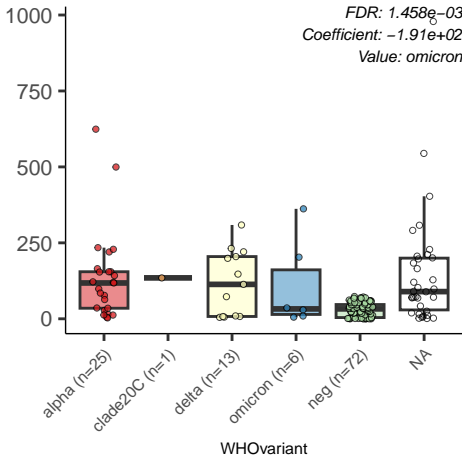

d\_Bacteria.p\_Aquificae.c\_Aquificae.o\_Aquificae

FDR:  $1.476e-03$   
Coefficient:  $-5.60e+02$   
Value: neg

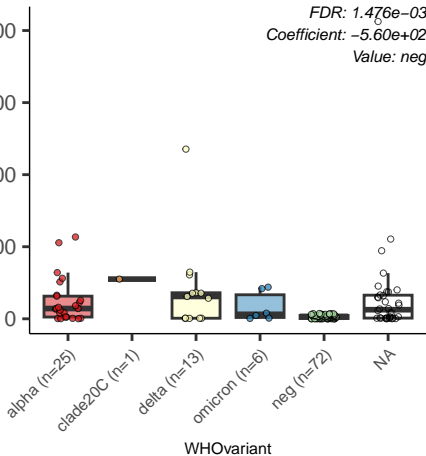

teroidetes.c\_Bacteroidia.o\_Bacteroidales.f\_Bacteroidaceae.g\_B

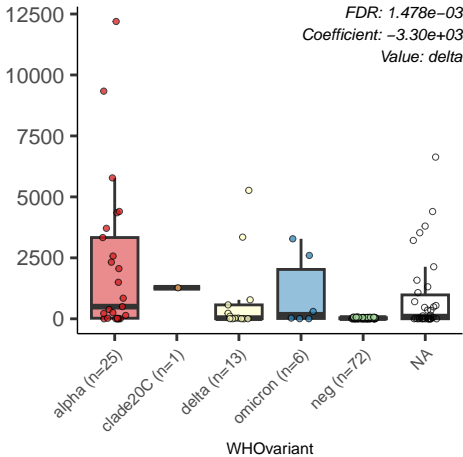



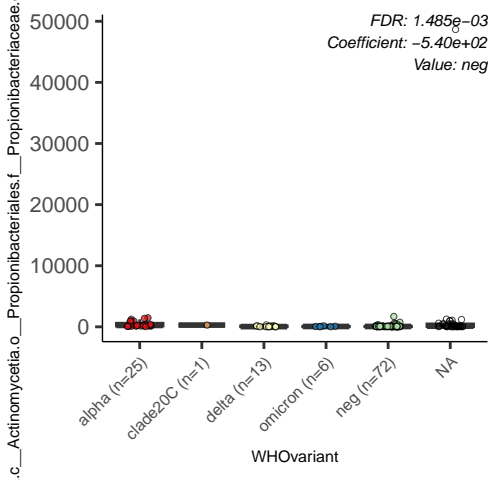

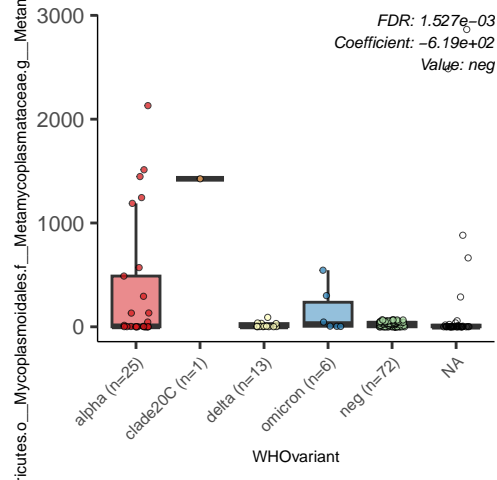

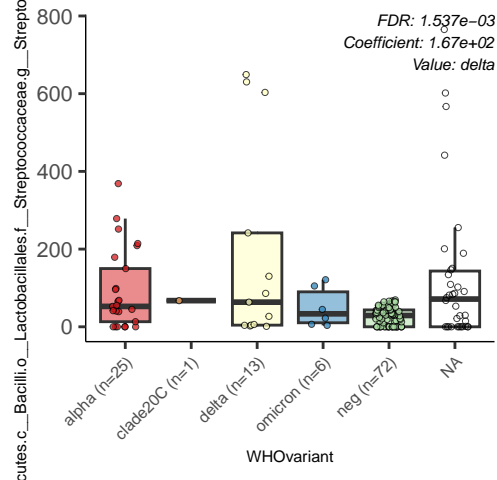

ia.c\_\_Betaproteobacteria.o\_\_Burkholderiales.f\_\_Burkholderiaceae.

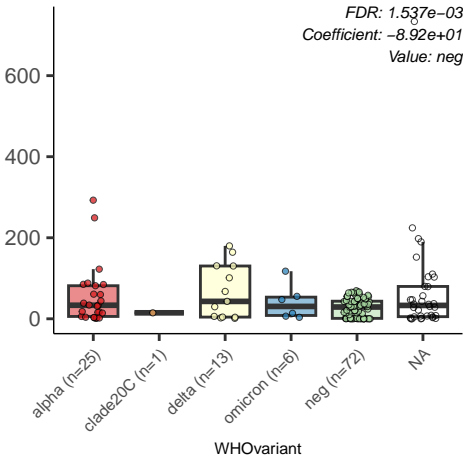

d\_Bacteria.p\_\_Fibrobacteres

FDR: 1.537e-03  
Coefficient: -1.30e+02  
Value: neg

alpha (n=25)

clade20C (n=1)

delta (n=13)

omicron (n=6)

neg (n=72)

NA

WHOvariant

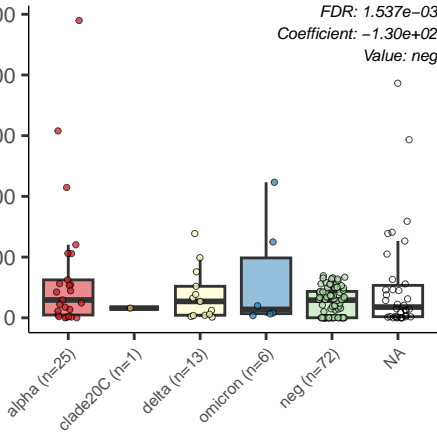

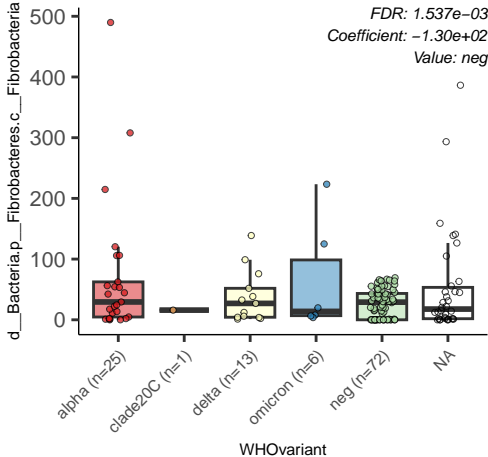

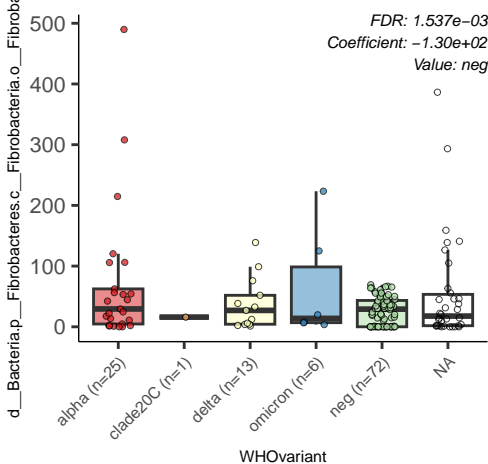

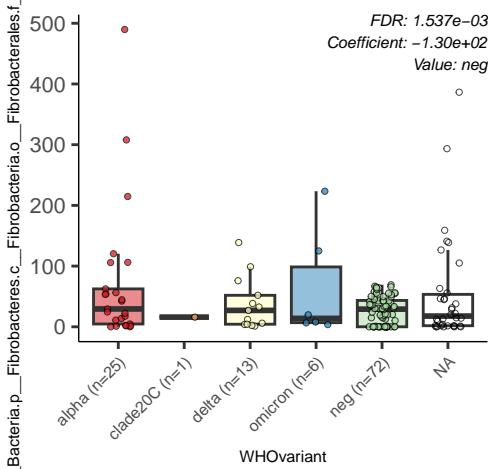



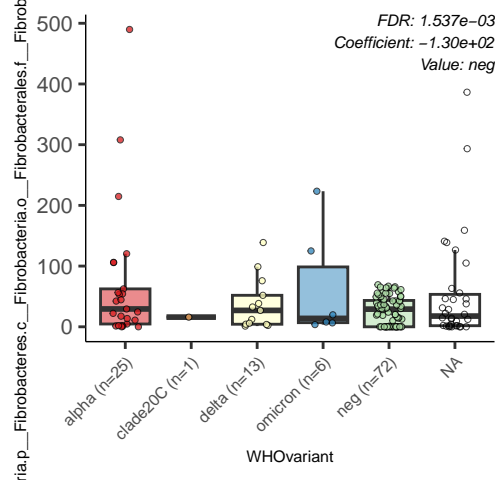

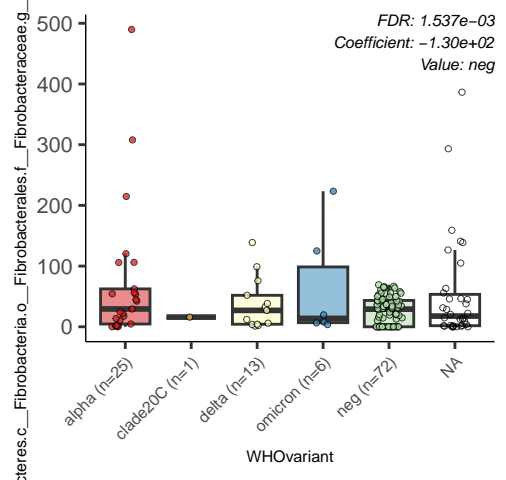

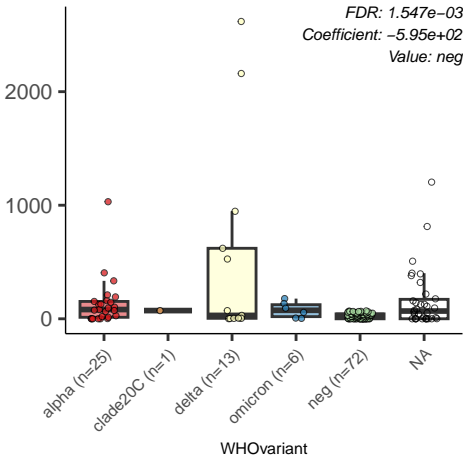

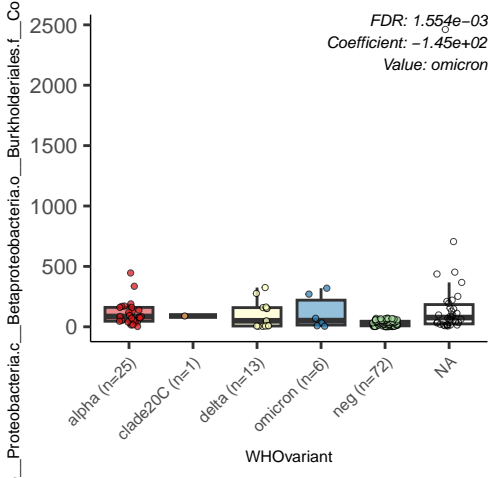

cteria.p\_\_Firmicutes.c\_\_Clostridia.o\_\_Eubacteriales.f\_\_Oscillospira

*FDR: 1.561e-03*  
*Coefficient: -5.37e+02*  
*Value: delta*

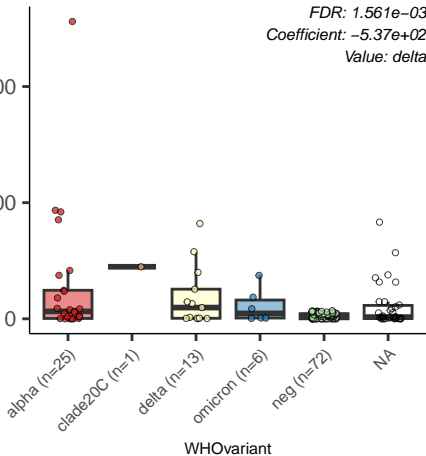

icutes.c\_\_Clostridia.o\_\_Eubacteriales.f\_\_Oscillospiraceae.g\_\_Magne

*FDR: 1.561e-03*  
*Coefficient: -5.37e+02*  
*Value: delta*

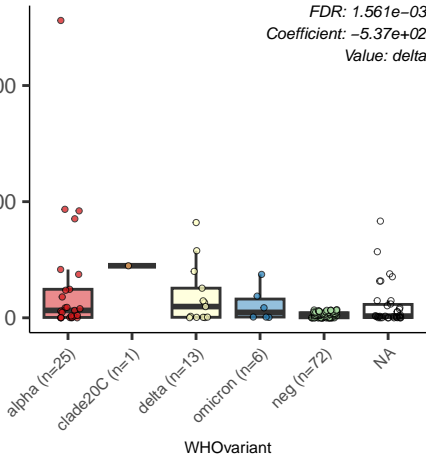

$FDR: 1.590e-03$   
 $Coefficient: -5.37e+02$   
 $Value: neg$

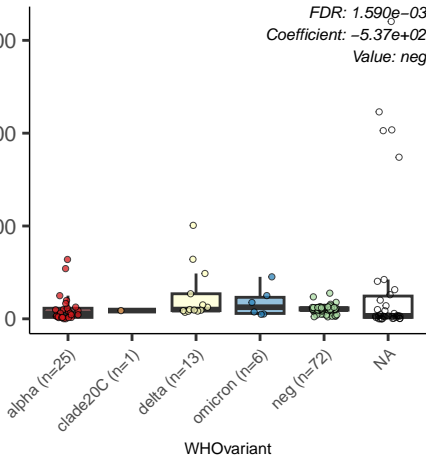

d\_\_Bacteria.p\_\_Proteobacteria.c\_\_Gammaproteobacteria.o\_\_Xa

FDR:  $1.600e-03$   
Coefficient:  $-1.50e+05$   
Value<sub>neg</sub>

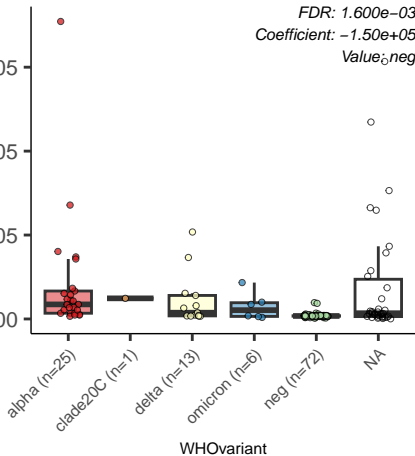



Proteobacteria.c\_\_Betaproteobacteria.o\_\_Burkholderiales.f\_\_Coxiella

FDR:  $1.601e-03$   
Coefficient:  $-9.92e+01$   
Value: delta

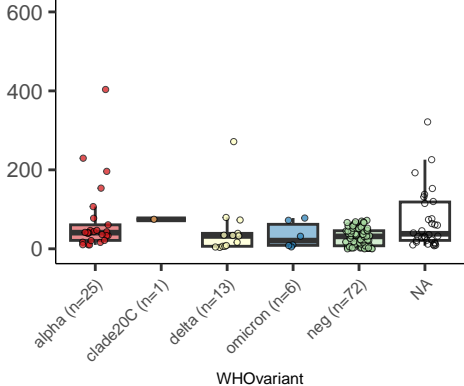

ria.p\_\_Proteobacteria.c\_\_Gammaproteobacteria.o\_\_Xanthomonada

*FDR: 1.624e-03*  
*Coefficient: -1.50e+05*  
*Value; neg*

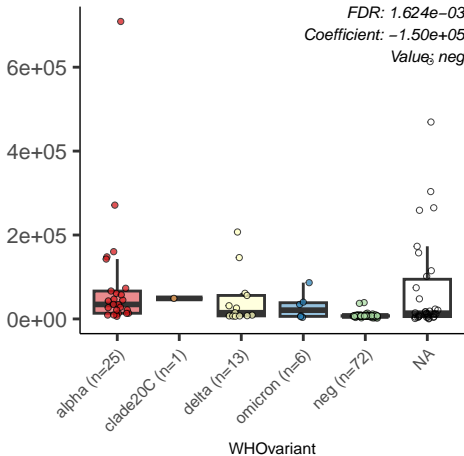

ammaproteobacteria.o\_\_Pseudomonadales.f\_\_Pseudomonadaceae

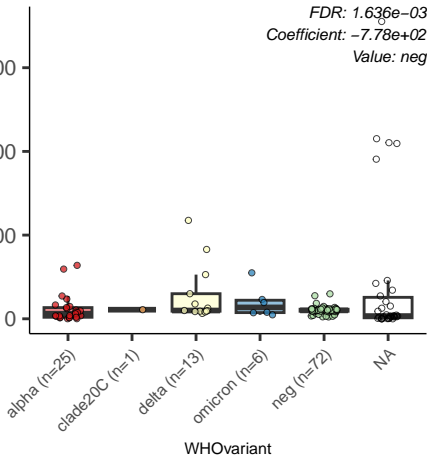

Bacteria.p\_\_Proteobacteria.c\_\_Alphaproteobacteria.o\_\_Rickettsiales

FDR:  $1.641e-03$   
Coefficient:  $-3.65e+02$   
Value: omicron

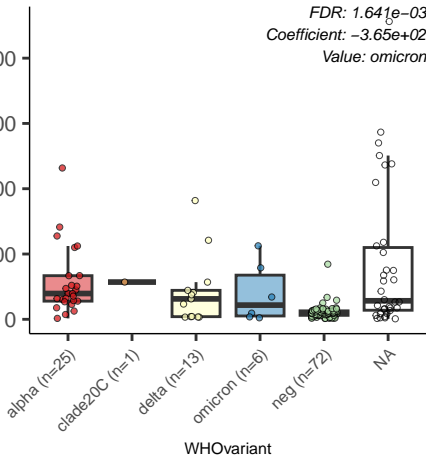

d\_Bacteria.p\_\_Proteobacteria.c\_\_Gammaproteobacteria.o\_\_O

*FDR: 1.643e-03*  
*Coefficient: 5.50e+02*  
*Value: delta*

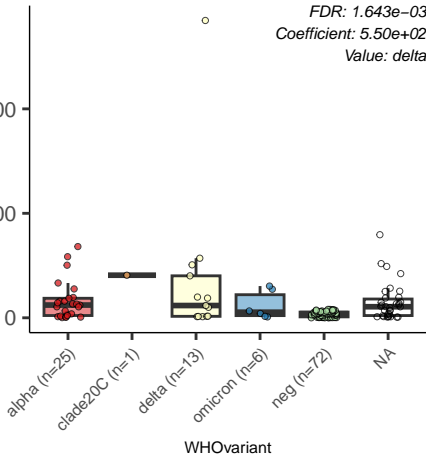

\_\_Epsilonproteobacteria.o\_\_Campylobacteriales.f\_\_Campylobacter

FDR: 1.648e-03  
Coefficient: -2.07e+04  
Value: omicron

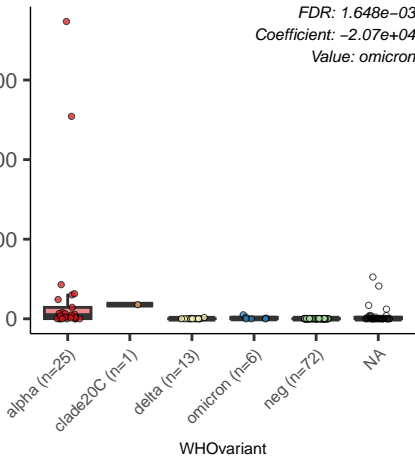

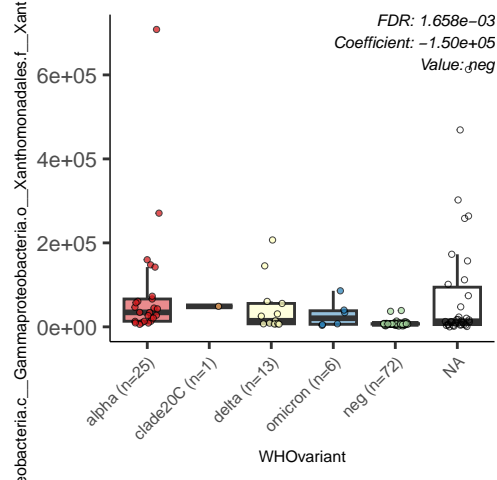

Bacteria.p\_Fusobacteria.c\_Fusobacteriia.o\_Fusobacteriales.f

FDR: 1.663e-03  
Coefficient: -3.84e+05  
Value: omicron

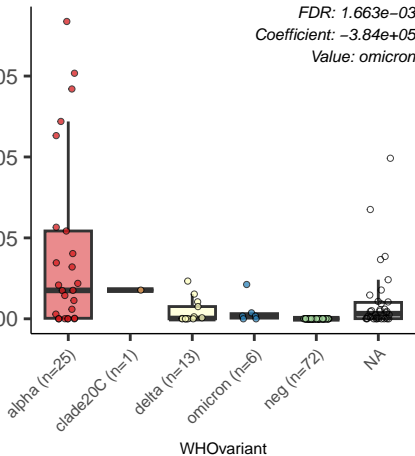



*FDR: 1.666e-03*  
*Coefficient: -1.50e+05*  
*Value: neg*

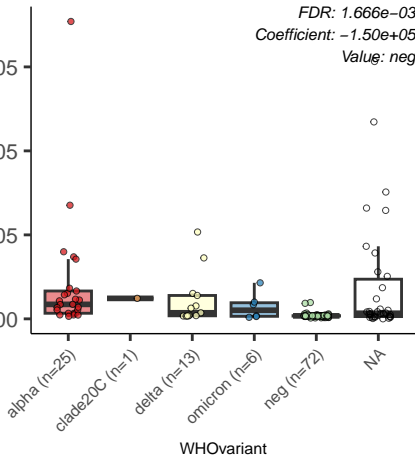

Bacteria.p\_\_Firmicutes.c\_\_Clostridia.o\_\_Eubacteriales.f\_\_Lachnos

FDR: 1.670e-03  
Coefficient: -1.81e+03  
Value: delta

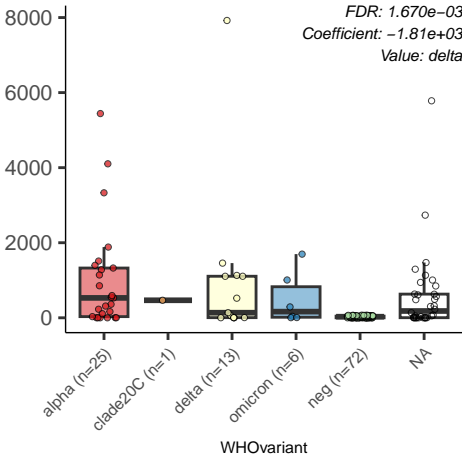

Firmicutes.c\_\_Clostridia.o\_\_Eubacteriales.f\_\_Lachnospiraceae.g

FDR: 1.670e-03  
Coefficient: -1.81e+03  
Value: delta

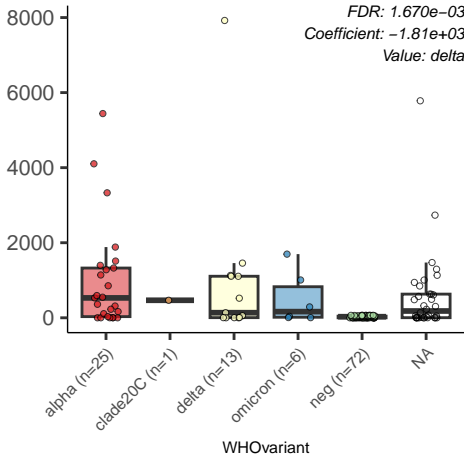

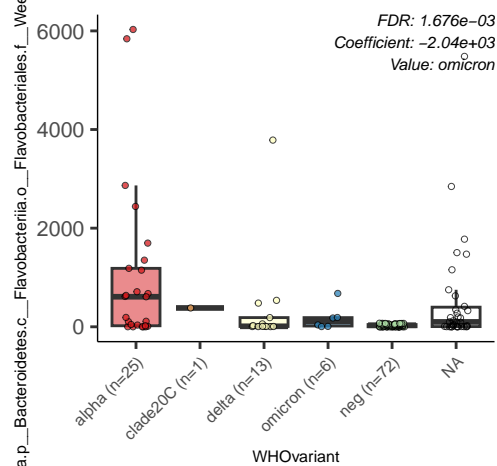

oidetes.c\_\_Flavobacteriia.o\_\_Flavobacteriales.f\_\_Weeksellaceae.g

FDR:  $1.676e-03$   
Coefficient:  $-2.04e+03$   
Value:  $\hat{\text{omicron}}$

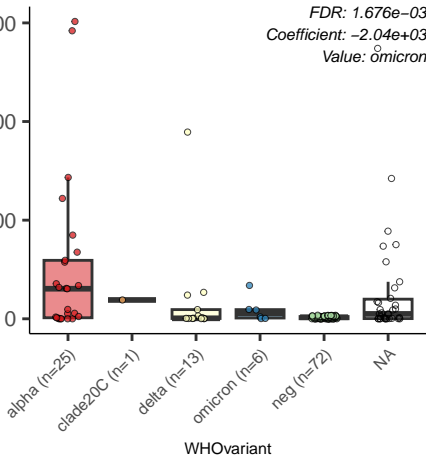

p\_\_Bacteroidetes.c\_\_Chitinophagia.o\_\_Chitinophagales.f\_\_Chitinop

*FDR: 1.684e-03*  
*Coefficient: -5.31e+02*  
*Value: delta*

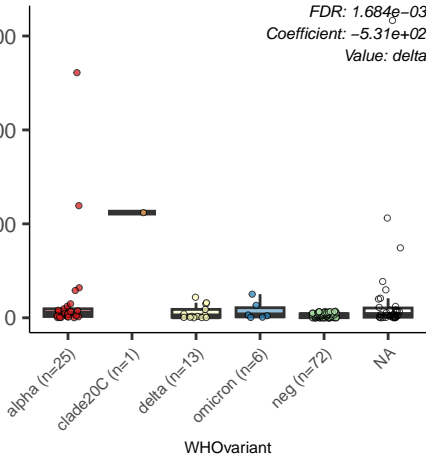

Bacteria.p\_Firmicutes.c\_Clostridia.o\_Eubacteriales.f\_Lachnos

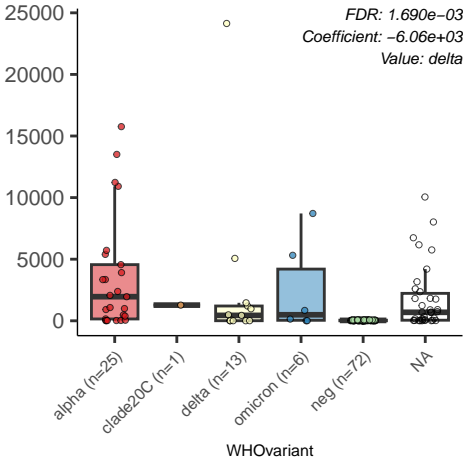

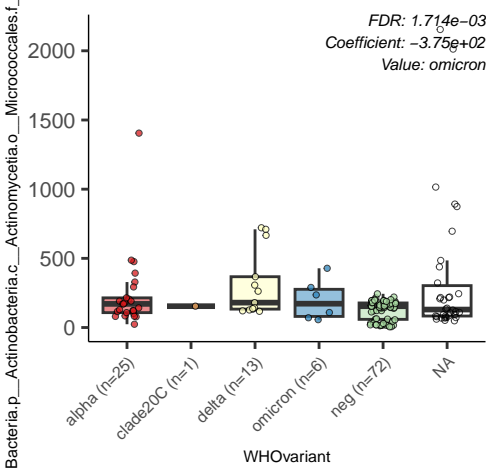



u.p\_\_Actinobacteria.c\_\_Actinomycetia.o\_\_Micrococcales.f\_\_Brevibac

FDR:  $1.714e-03$   
Coefficient:  $-3.75e+02$   
Value: omicron

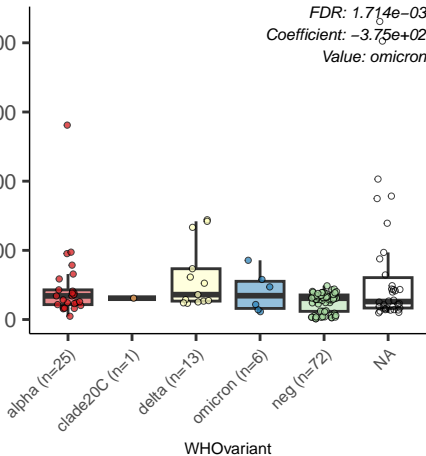

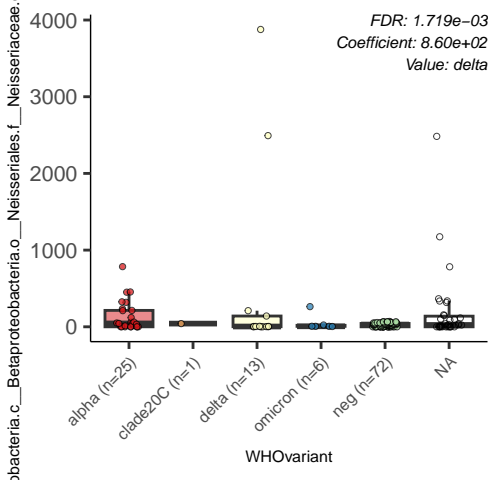

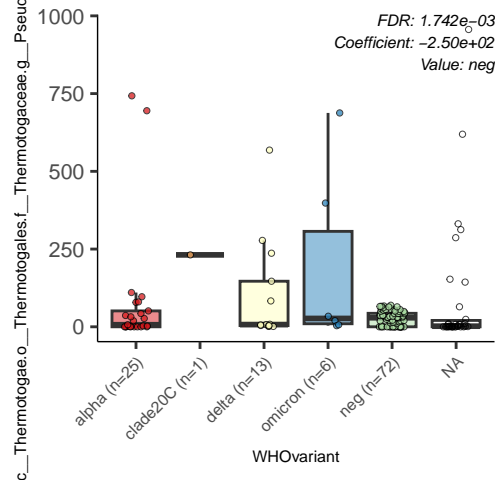

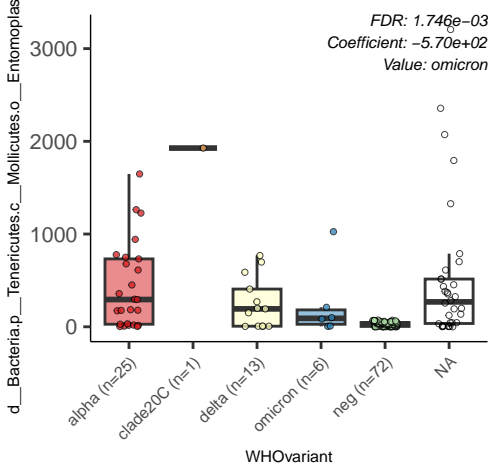

bacteria.c\_\_Actinomycetia.o\_\_Actinomycetales.f\_\_Actinomycetaceae

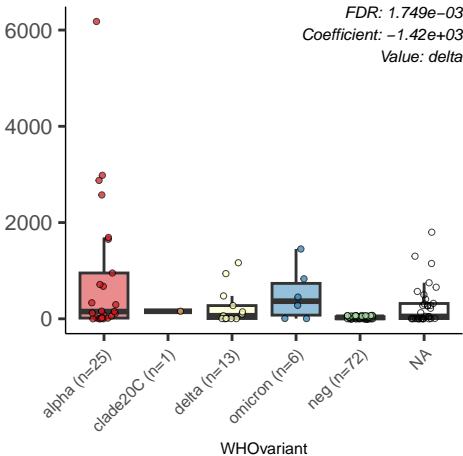

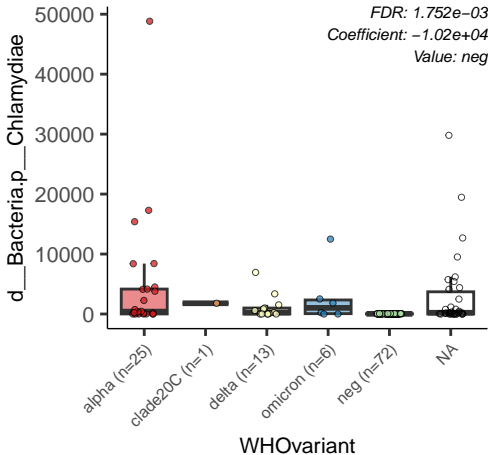

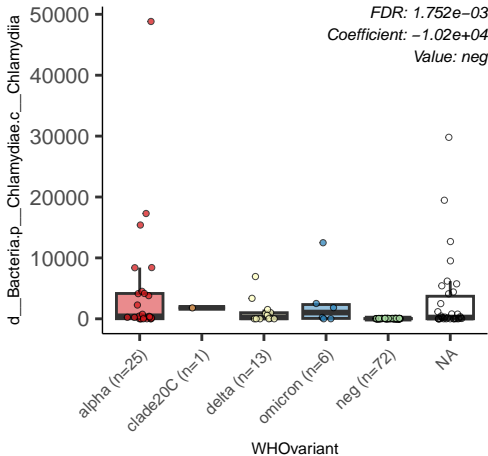

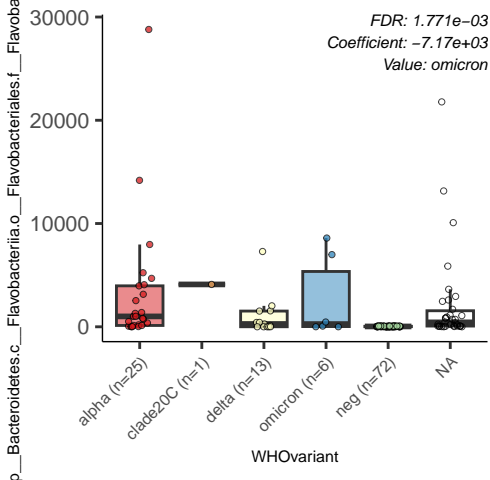



bacteria.c\_\_Fusobacteriia.o\_\_Fusobacteriales.f\_\_Leptotrichiaceae.g

FDR:  $1.805e-03$   
Coefficient:  $-8.13e+02$   
Value: neg

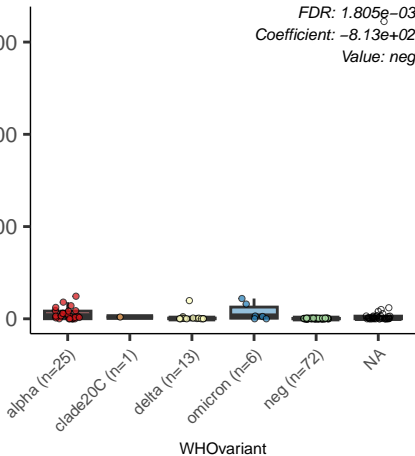

o\_\_Proteobacteria.c\_\_Alphaproteobacteria.o\_\_Rickettsiales.f\_\_Anal

FDR:  $1.834e-03$   
Coefficient:  $-2.52e+02$   
Value: delta

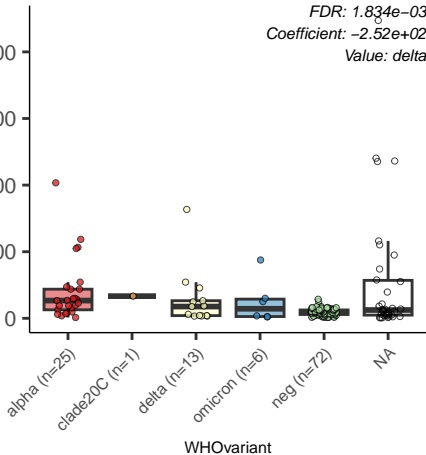

a.p.\_Firmicutes.c.\_Clostridia.o.\_Eubacteriales.f.\_Lachnospiraceae

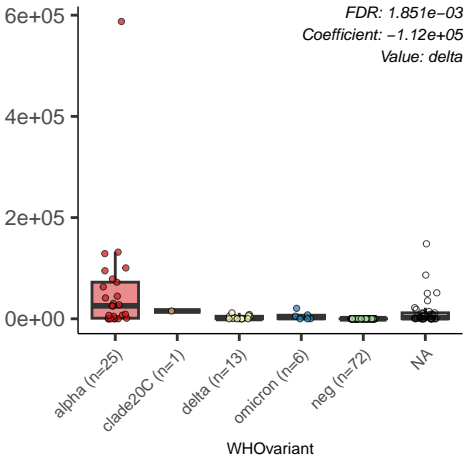

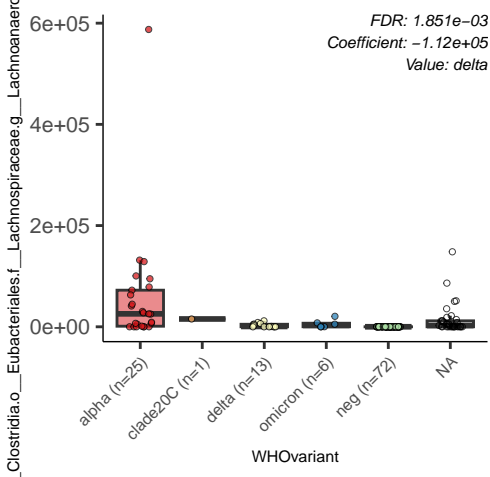

cutes.c\_\_Clostridia.o\_\_Eubacteriales.f\_\_Oscillospiraceae.g\_\_Rumini

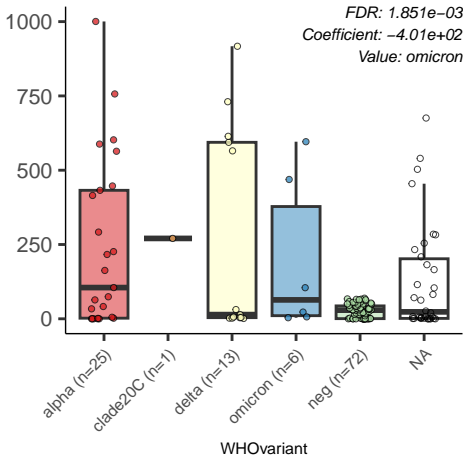

d\_Bacteria.p\_\_Bacteroidetes.c\_\_Bacteroidia.o\_\_Bacteroidales.f\_\_

FDR:  $1.867e-03$   
Coefficient:  $-5.62e+02$   
Value: omicron

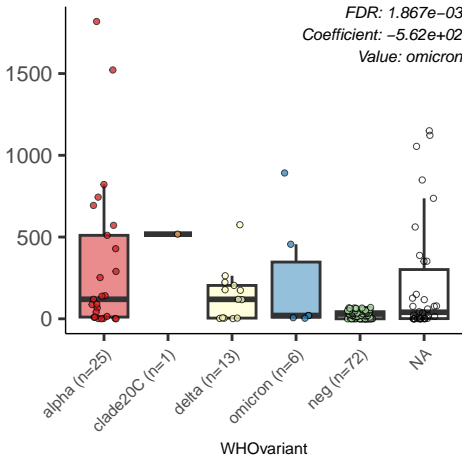

bacteria.p\_\_Bacteroidetes.c\_\_Bacteroidia.o\_\_Bacteroidales.f\_\_Tenu

FDR:  $1.867e-03$   
Coefficient:  $-5.62e+02$   
Value: omicron

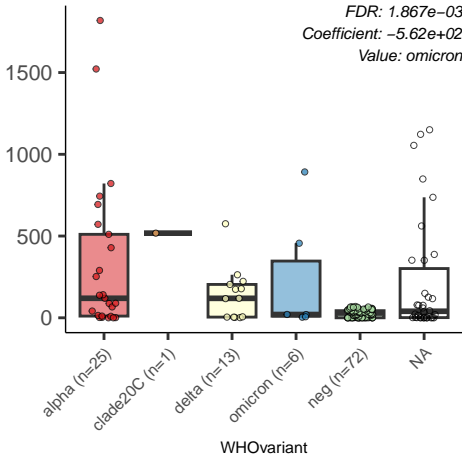

bacteroidetes.c\_\_Bacteroidia.o\_\_Bacteroidales.f\_\_Tenuifilaceae.g\_\_T

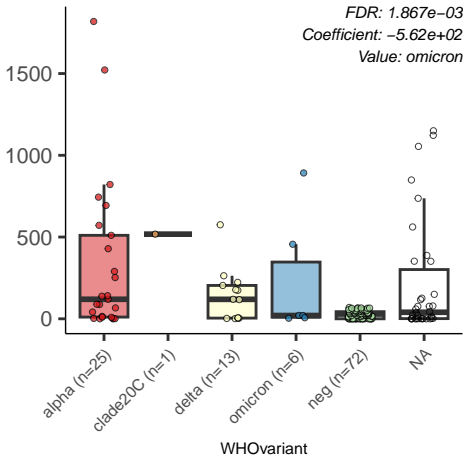



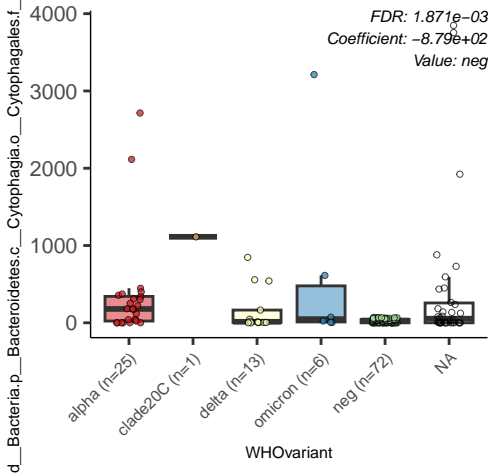

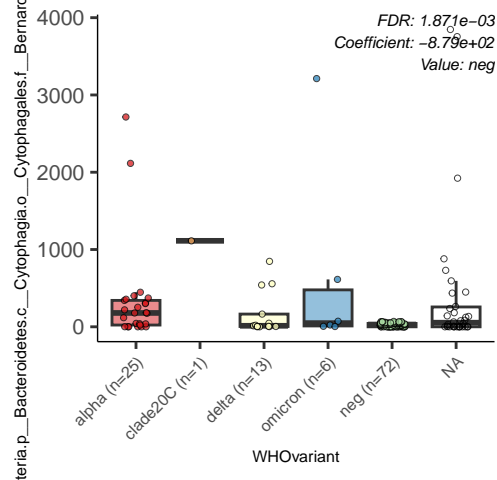

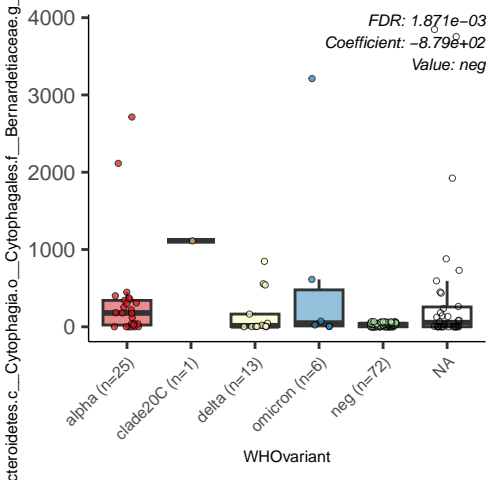

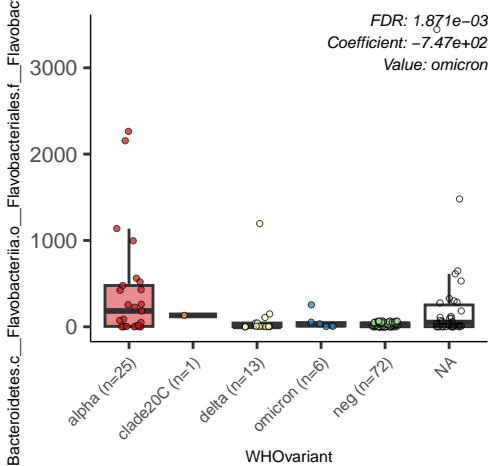

c\_Flavobacteriia.o\_Flavobacteriales.f\_Flavobacteriaceae.g\_Ar

FDR:  $1.871e-03$   
Coefficient:  $-7.47e+02$   
Value: omicron

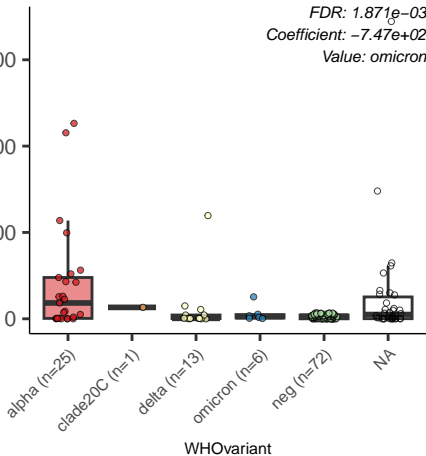

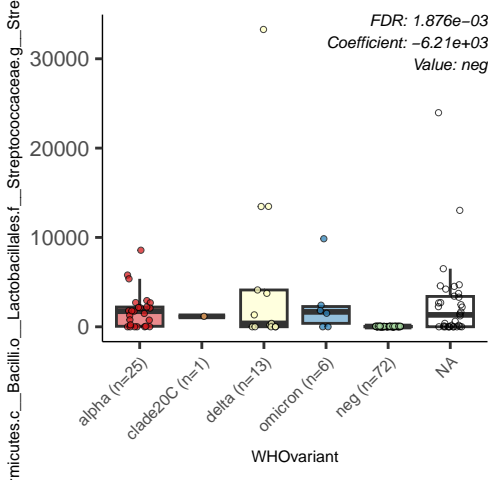

Flavobacteriia.o\_\_Flavobacteriales.f\_\_Weeksellaceae.g\_\_Chryse

FDR:  $1.876e-03$   
Coefficient:  $-1.76e+02$   
Value: delta

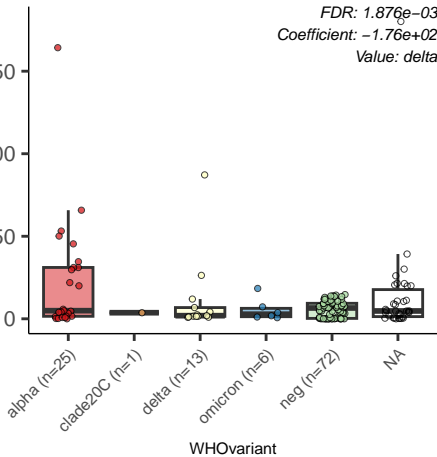

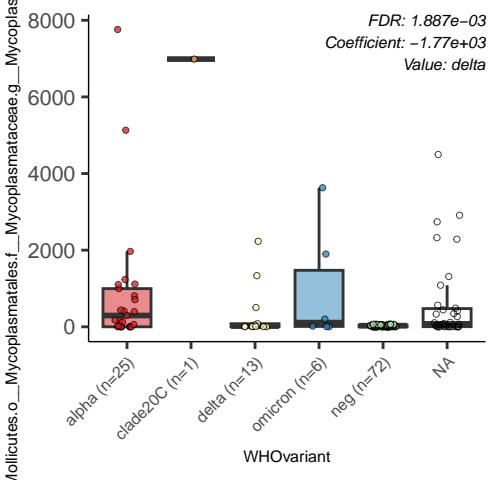



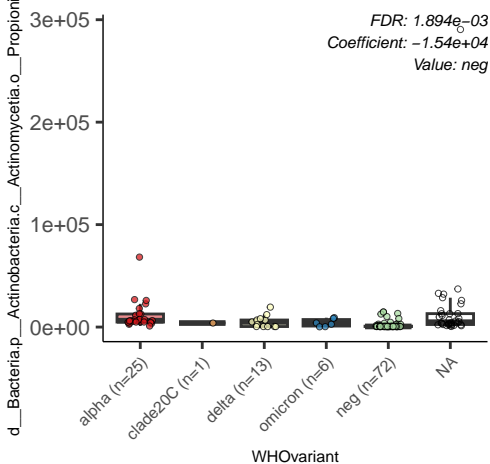

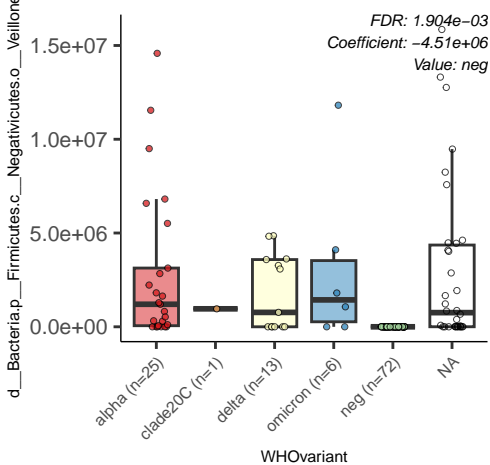

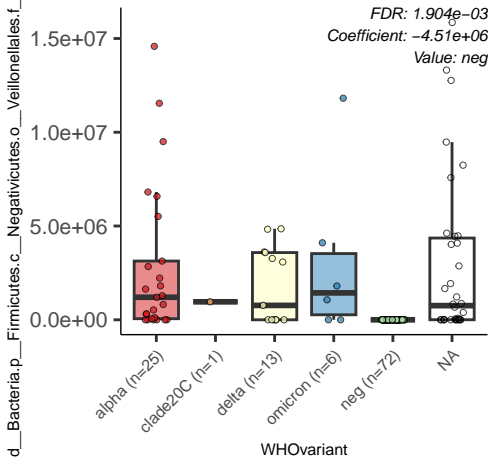

Proteobacteria.c\_\_Alphaproteobacteria.o\_\_Rhodospirillales.f\_\_Acet

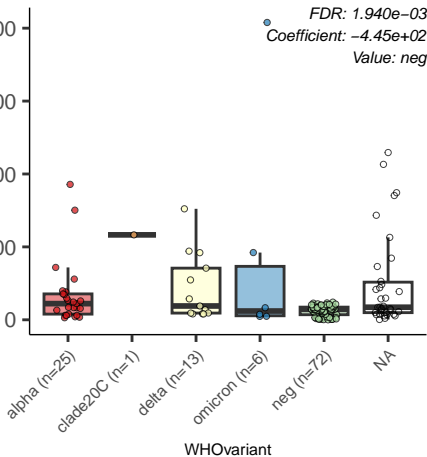

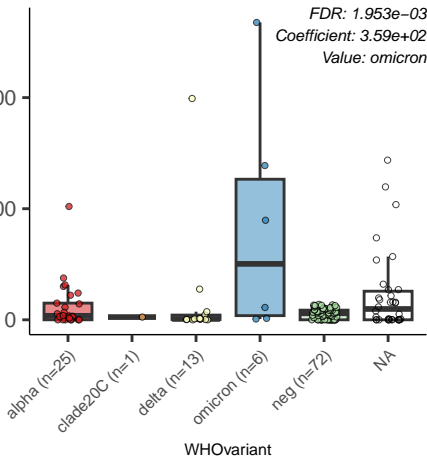

c\_\_Clostridia.o\_\_Eubacteriales.f\_\_Desulfotobiaceae.g\_\_Desulf

FDR:  $1.961e-03$   
Coefficient:  $-4.09e+02$   
Value: omicron

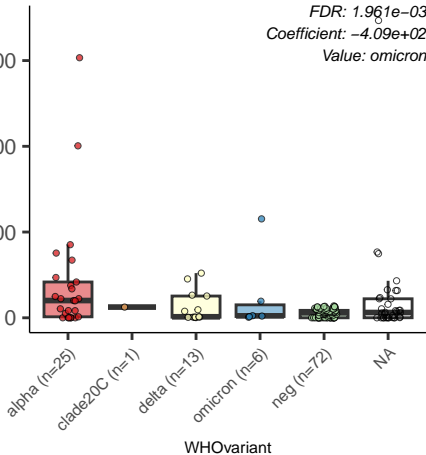

bacteria.o\_\_Synechococcales.f\_\_Synechococcaceae.g\_\_Synecho

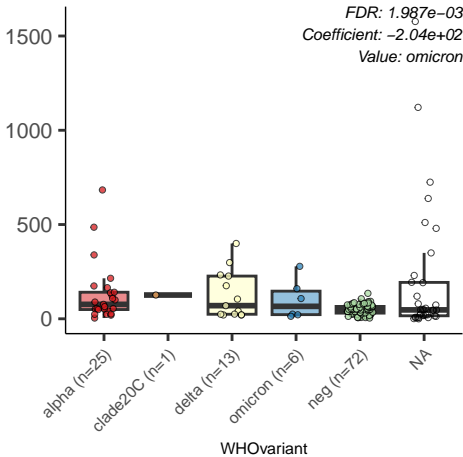

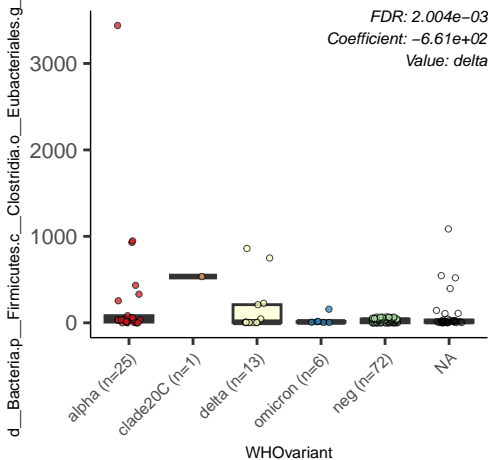



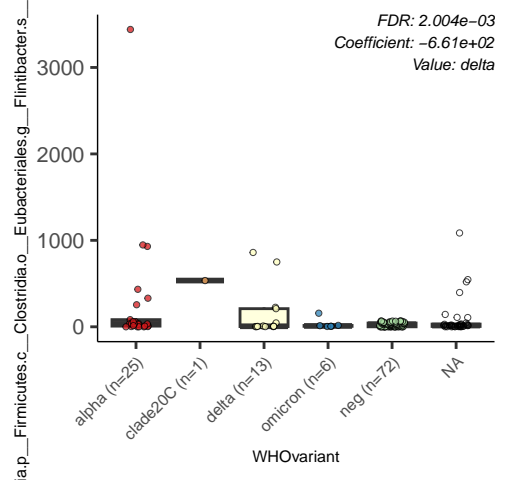

bacteria.p\_Firmicutes.c\_Clostridia.o\_Eubacteriales.f\_Lachnosp

FDR:  $2.020e-03$   
Coefficient:  $-5.75e+02$   
Value: omicron

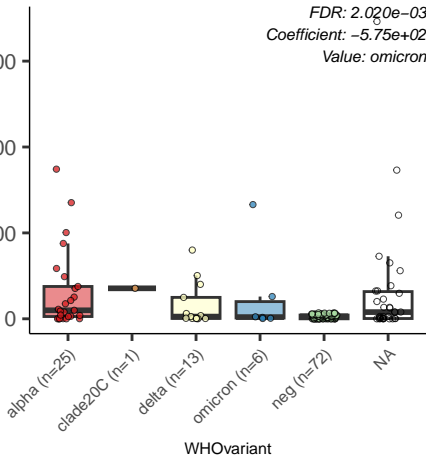

irmicutes.c\_\_Clostridia.o\_\_Eubacteriales.f\_\_Lachnospiraceae.g\_\_S

*FDR: 2.020e-03*  
*Coefficient: -5.75e+02*  
*Value: omicron*

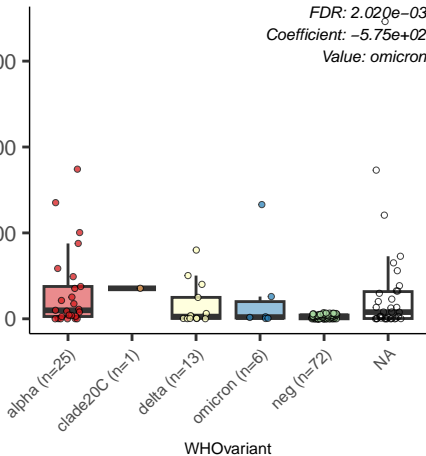

irmicutes.c\_\_Bacilli.o\_\_Lactobacillales.f\_\_Lactobacillaceae.g\_\_Lact

*FDR: 2.054e-03*  
*Coefficient: -7.14e+02*  
*Value: delta*

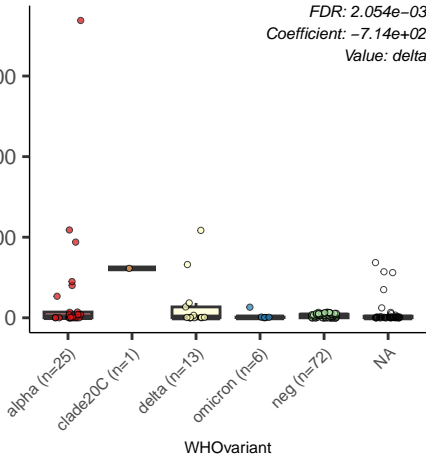

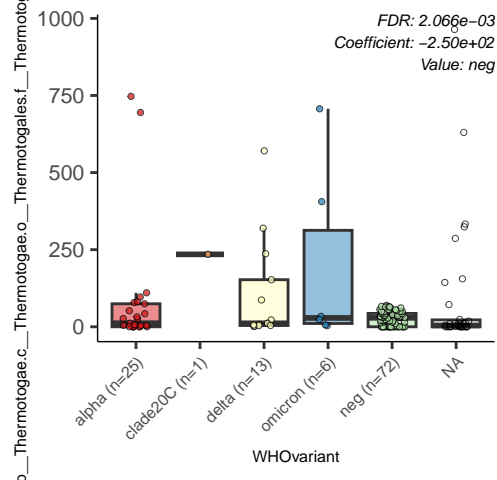

d\_\_Bacteria.p\_\_Chloroflexi.c\_\_Candidatus.Thermofo

FDR: 2.067e-03  
Coefficient: -1.19e+02  
Value: neg

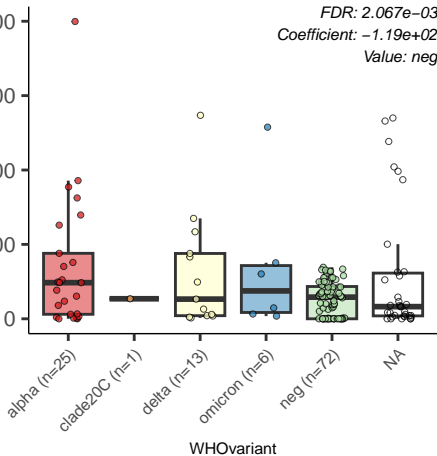

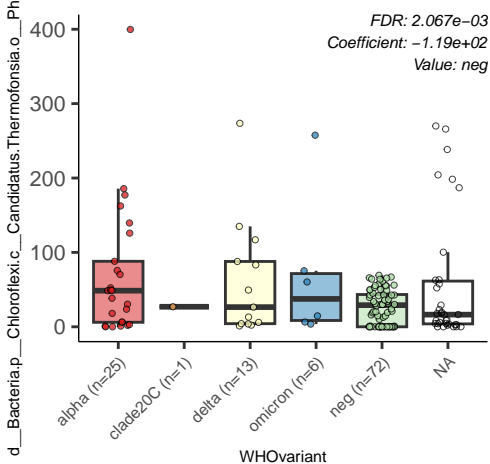

tertia.p\_\_Chloroflexi.c\_\_Candidatus.Thermofonsia.o\_\_Phototrophica

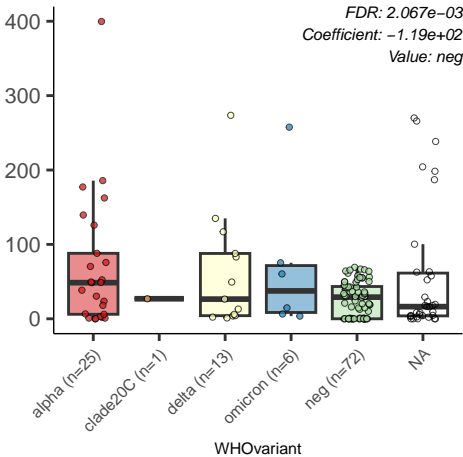



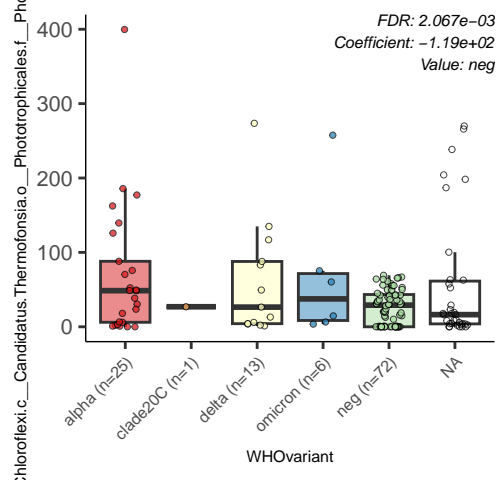

didatus.Thermofonsia.o\_\_Phototrophicales.f\_\_Phototrophiceae.g

*FDR: 2.067e-03*  
*Coefficient: -1.19e+02*  
*Value: neg*

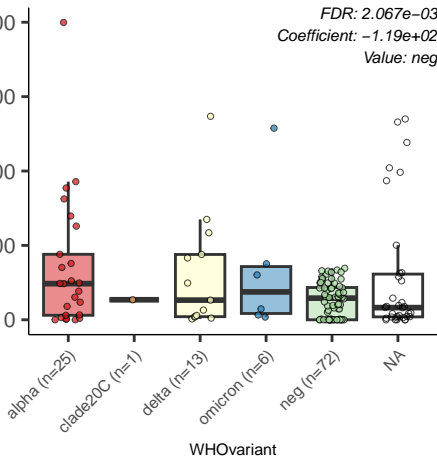

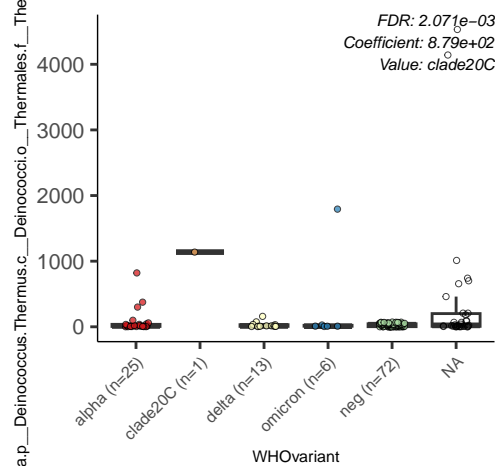

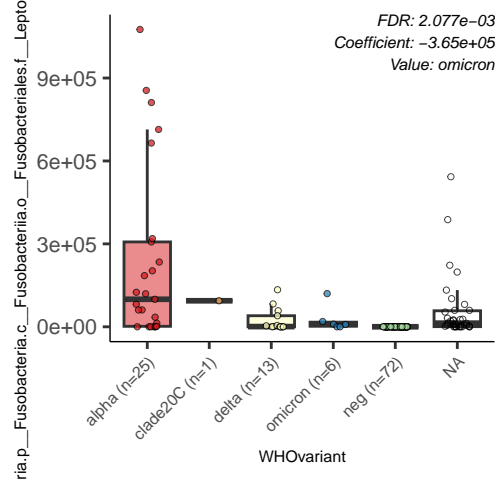

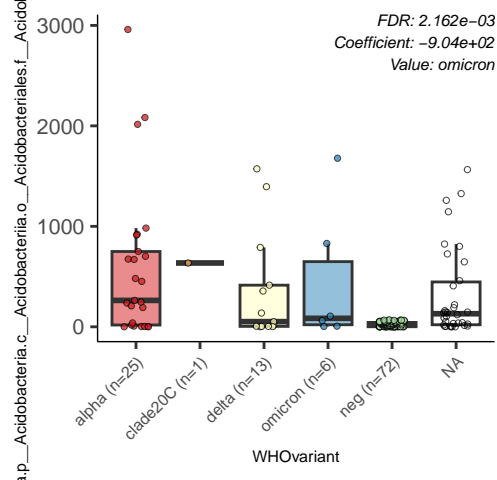

Actinomycetia.o\_\_Corynebacteriales.f\_\_Corynebacteriaceae.g\_\_Co

FDR: 2.162e-03  
Coefficient: -9.99e+02  
Value: delta

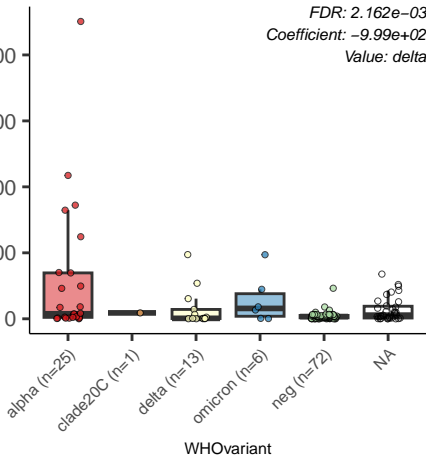

bacteria.p\_Firmicutes.c\_Clostridia.o\_Eubacteriales.f\_Clostridiaceae

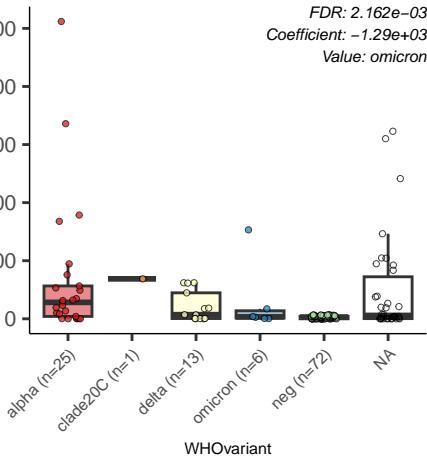

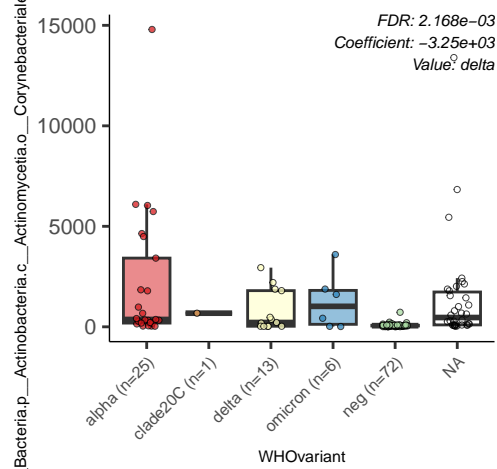



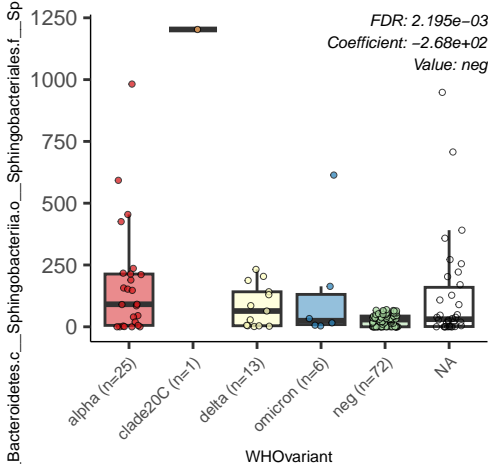

micutes.c\_\_Bacilli.o\_\_Lactobacillales.f\_\_Streptococcaceae.g\_\_Streptococcus

FDR:  $2.195e-03$   
Coefficient:  $-2.37e+04$   
Value: neg

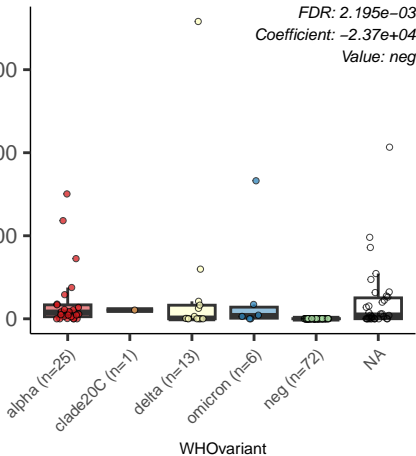

bacteria.p\_\_Firmicutes.c\_\_Negativicutes.o\_\_Veillonellales.f\_\_Veillon

FDR:  $2.242e-03$   
Coefficient:  $-3.79e+06$   
Value: neg

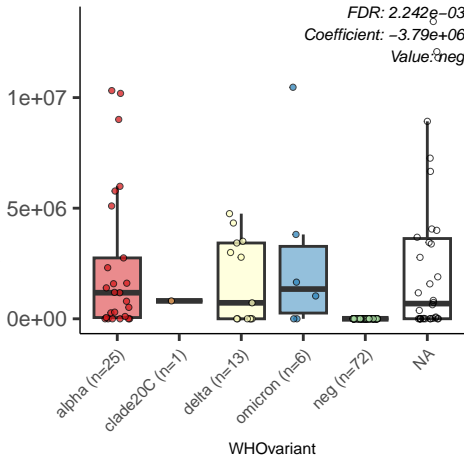

Actinomycetia.o\_Pseudonocardiales.f\_Pseudonocardaceae.g

FDR: 2.252e-03  
Coefficient: -3.74e+03  
Value: omicron

10000

5000

0

alpha (n=25)

clade20C (n=1)

delta (n=13)

omicron (n=6)

neg (n=72)

NA

WHOvariant

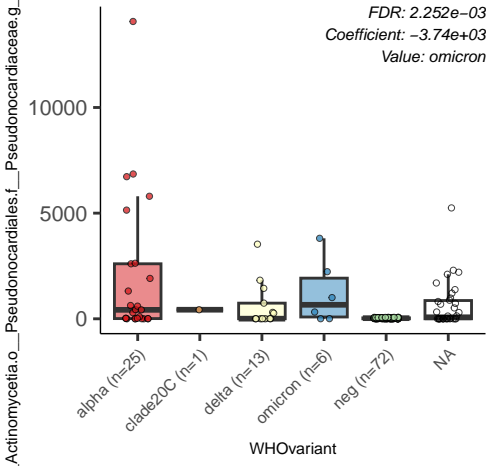

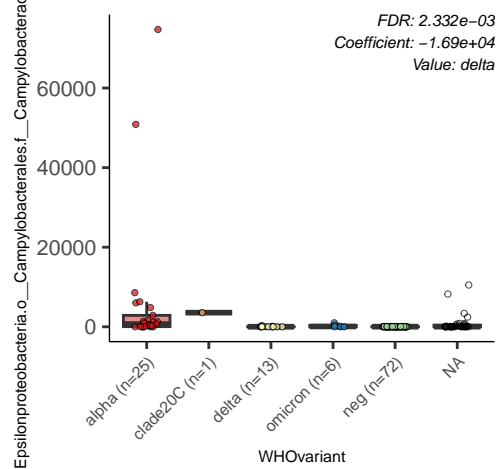

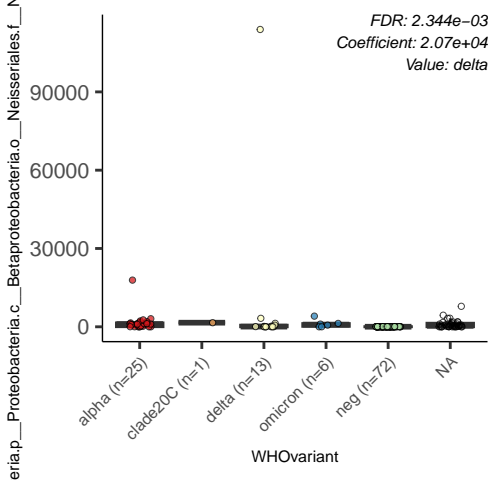

eria.p\_\_Proteobacteria.c\_\_Alphaproteobacteria.o\_\_Hyphomicrobia

*FDR: 2.367e-03*  
*Coefficient: -7.23e+02*  
*Value: neg*

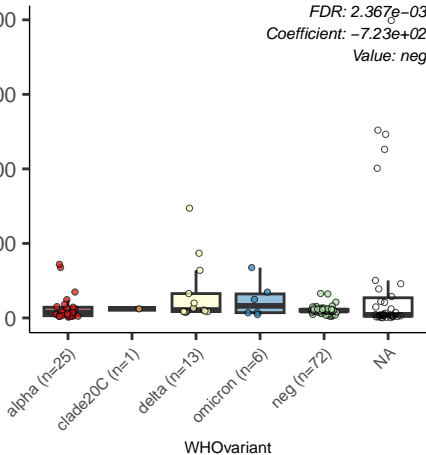

FDR:  $2.372e-03$   
Coefficient:  $-8.71e+02$   
Value: omicron

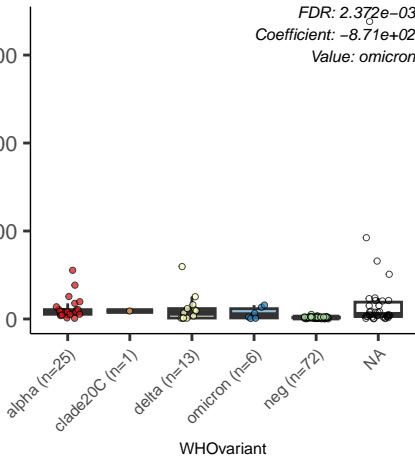



cutes.c\_Bacilli.o\_Lactobacillales.f\_Streptococcaceae.g\_Strepto

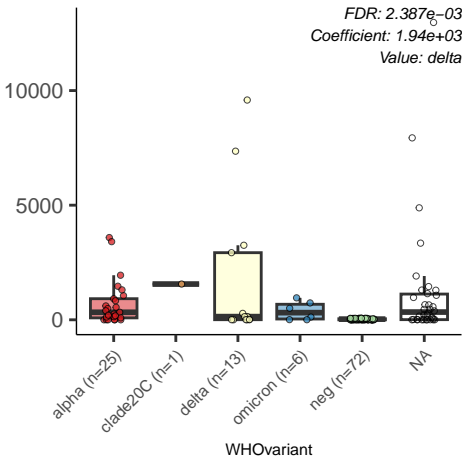

.p\_\_Proteobacteria.c\_\_Gammaproteobacteria.o\_\_Enterobacterales

FDR:  $2.413e-03$   
Coefficient:  $-2.75e+02$   
Value: neg

1000

500

0

alpha (n=25)

clade20C (n=1)

delta (n=13)

omicron (n=6)

neg (n=72)

NA

WHOvariant

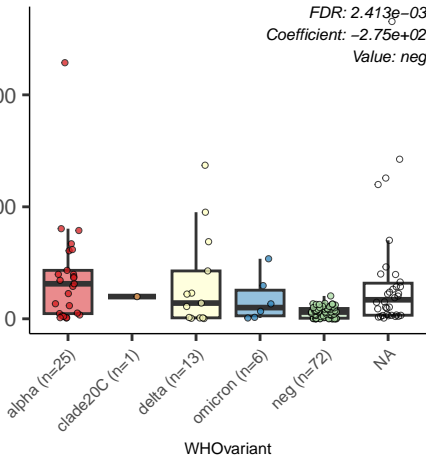

bacteria.c\_\_Gammaproteobacteria.o\_\_Enterobacterales.f\_\_Erwinia

FDR:  $2.413e-03$   
Coefficient:  $-2.75e+02$   
Value: neg

1000

500

alpha (n=25)

clade20C (n=1)

delta (n=13)

omicron (n=6)

neg (n=72)

NA

WHOvariant

0

0

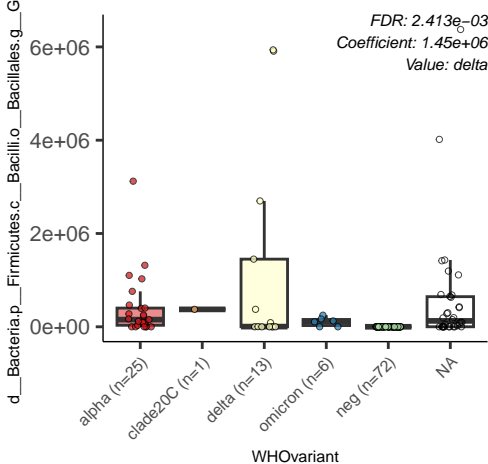

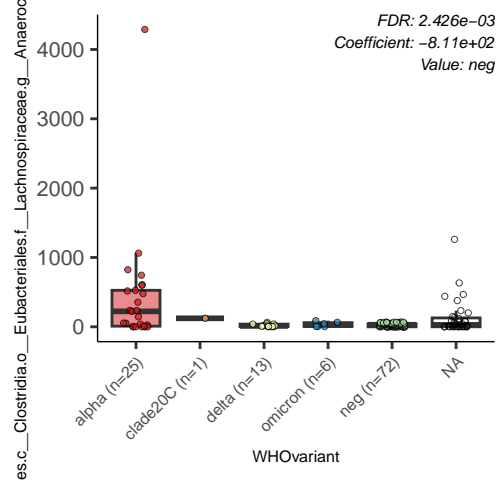

cteria.p\_Actinobacteria.c\_Thermoleophila.o\_Solirubrobacterales

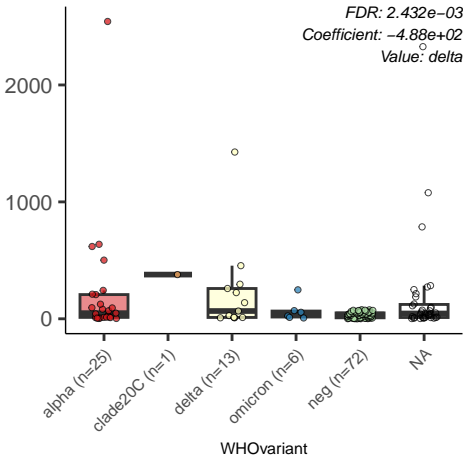

Actinobacteria.c\_\_Thermoleophila.o\_\_Solirubrobacterales.f\_\_Con

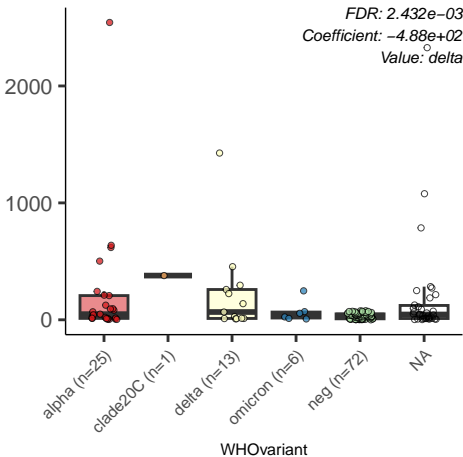

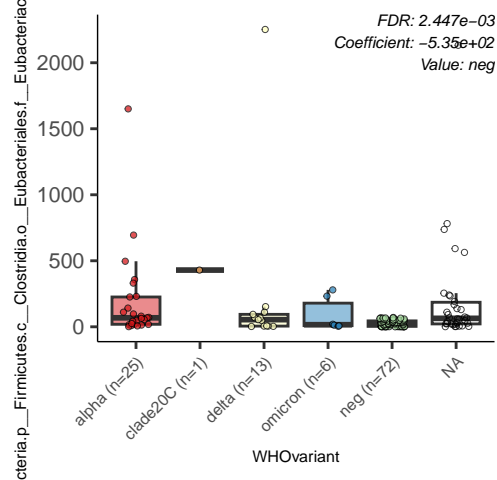



a.p.\_Bacteroidetes.c\_Flavobacteriia.o\_Flavobacteriales.f\_Week

FDR: 2.502e-03  
Coefficient: -2.23e+03  
Value: omicron

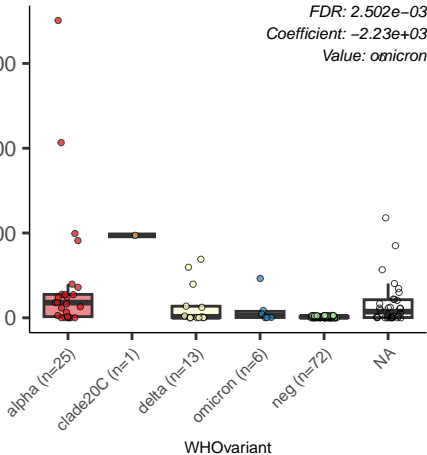

Firmicutes.c\_\_Clostridia.o\_\_Eubacteriales.f\_\_Clostridiaceae.g\_\_Clo

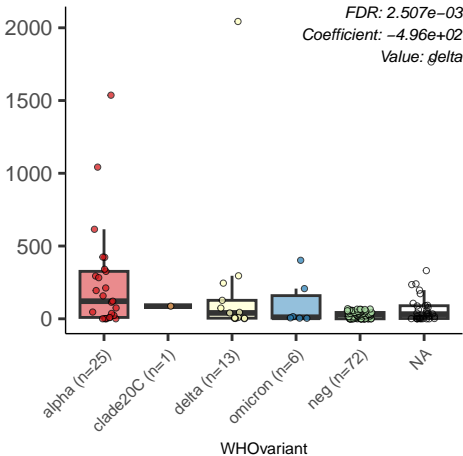

d\_Bacteria.p\_Actinobacteria.c\_Actinomycetia.o\_Coryne

$FDR: 2.514e-03$   
 $Coefficient: -6.90e+04$   
 $Value: delta$

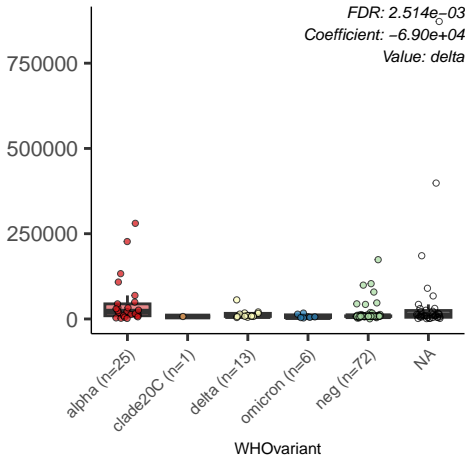

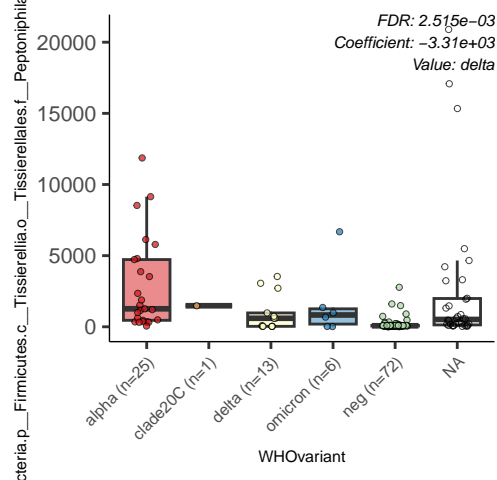

d\_Bacteria.p\_Cyanobacteria.o\_Oscillatoriales.f\_Microo

FDR:  $2.531e-03$   
Coefficient:  $-4.17e+02$   
Value: omicron

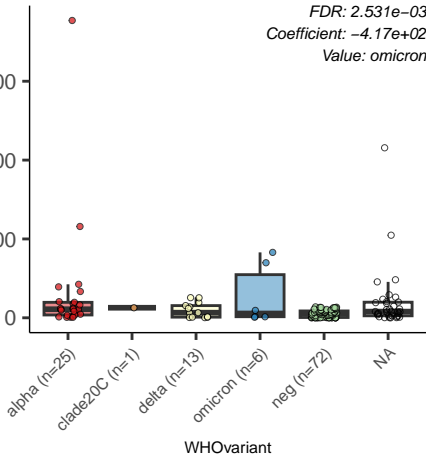

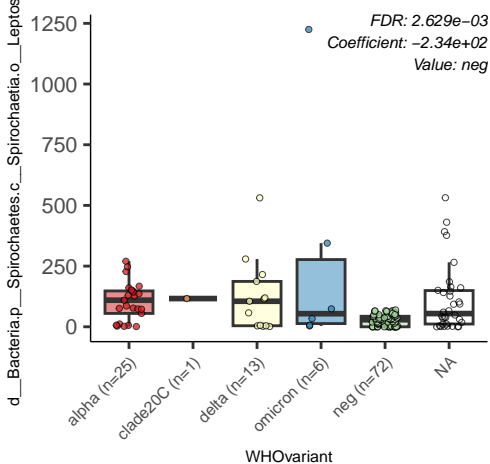

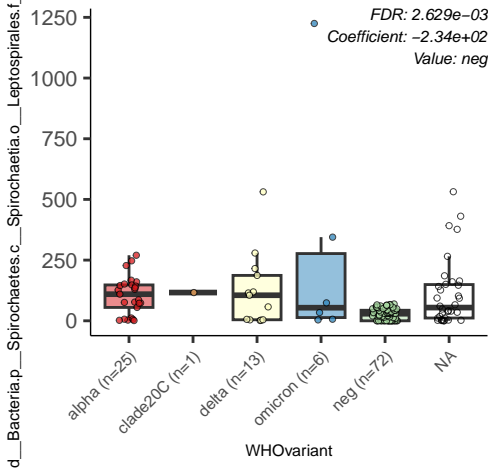

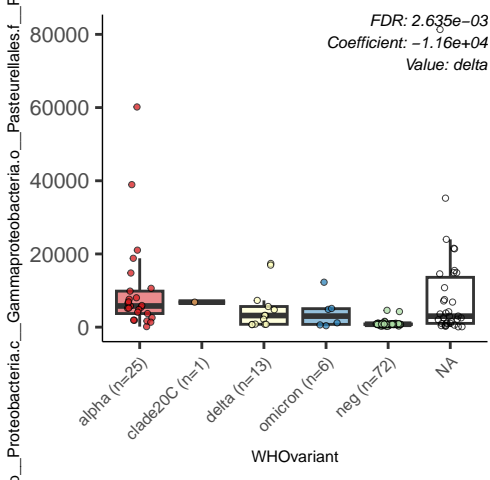



FDR:  $2.641e-03$   
Coefficient:  $-9.24e+03$   
Value: neg

1e+05

5e+04

0e+00

alpha (n=25)

clade20C (n=1)

delta (n=13)

omicron (n=6)

neg (n=72)

NA

WHOvariant

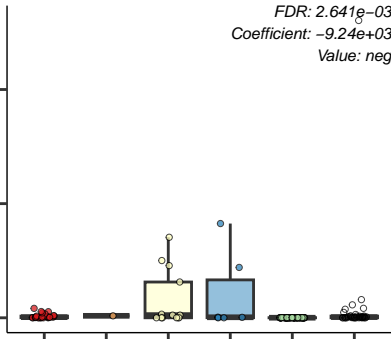

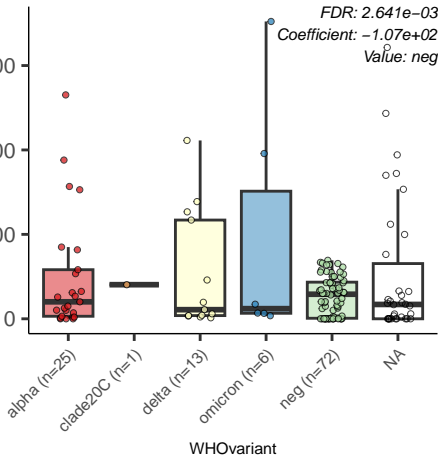

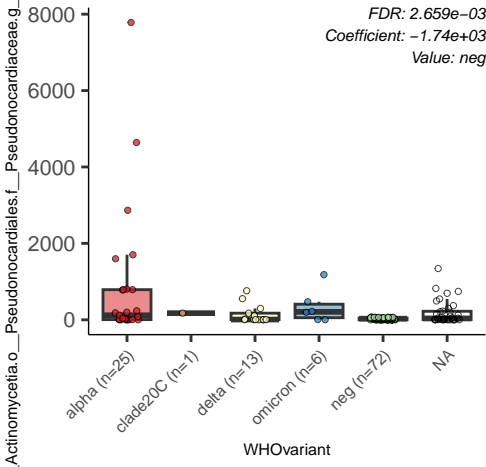

Proteobacteria.c\_\_Alphaproteobacteria.o\_\_Hyphomicrobiales.f\_\_Xa

FDR:  $2.743e-03$   
Coefficient:  $-4.09e+02$   
Value: neg

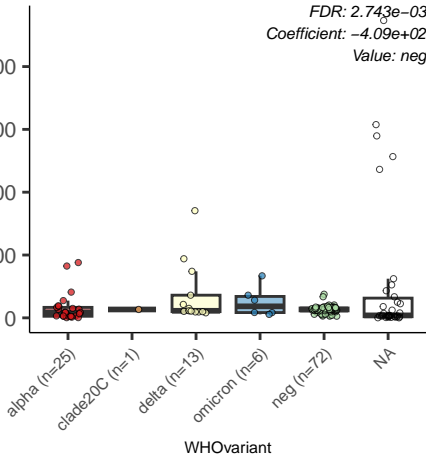

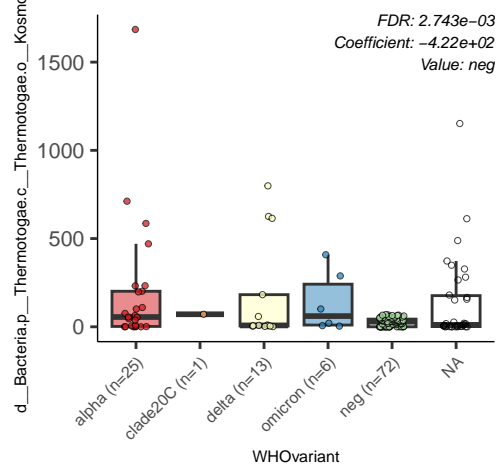

d\_Bacteria.p\_Thermotogae.c\_Thermotogae.o\_Kosmotogales.f

*FDR: 2.743e-03*  
*Coefficient: -4.22e+02*  
*Value: neg*

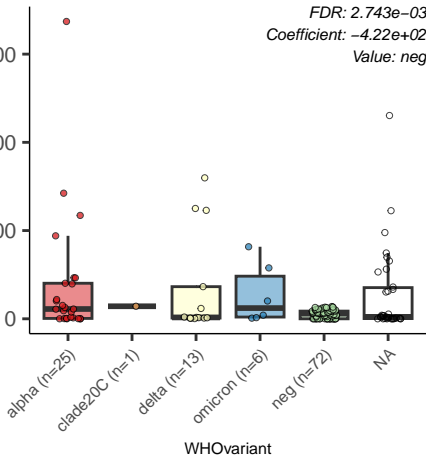

d\_Bacteria.p\_Firmicutes.c\_Bacilli.o\_Bacillales.f\_Alicyclo

FDR:  $2.751e-03$   
Coefficient:  $-5.29e+02$   
Value: neg

2000

1000

0

alpha (n=25)

clade20C (n=1)

delta (n=13)

omicron (n=6)

neg (n=72)

NA

WHOvariant

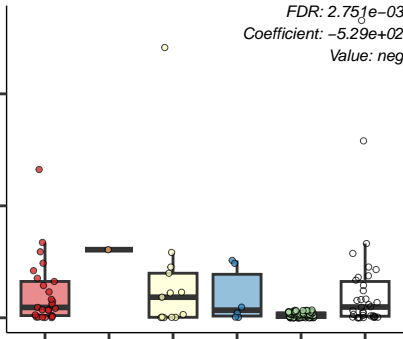

FDR:  $2.771e-03$   
Coefficient:  $-1.84e+02$   
Value: neg

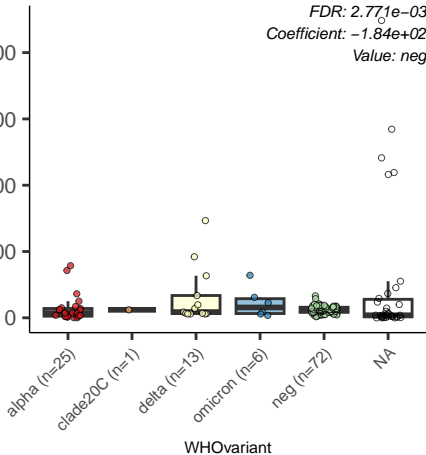



teobacteria.c\_\_Betaproteobacteria.o\_\_Neisseriales.f\_\_Neisseriaceae

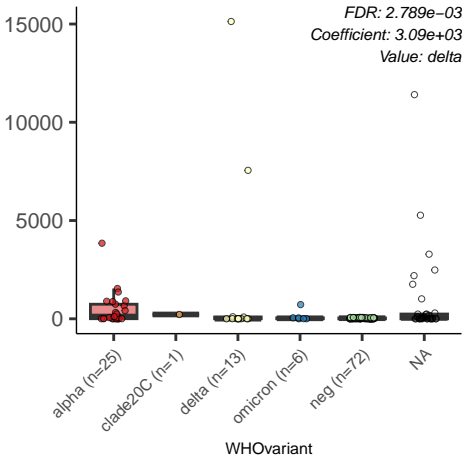

\_\_Bacteria.p\_Firmicutes.c\_Bacilli.o\_Bacillales.f\_Planococcaceae

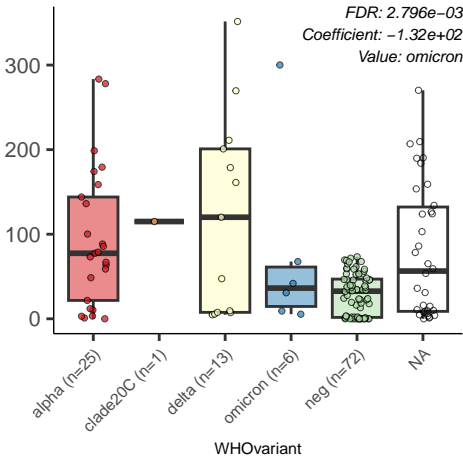

eria.p\_\_Firmicutes.c\_\_Clostridia.o\_\_Eubacteriales.f\_\_Oscillospirace

FDR:  $2.801e-03$   
Coefficient:  $-6.81e+02$   
Value: omicron

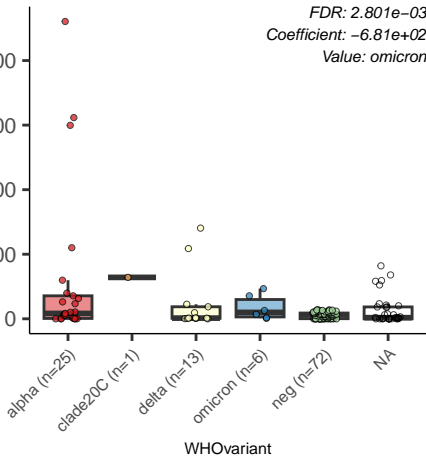

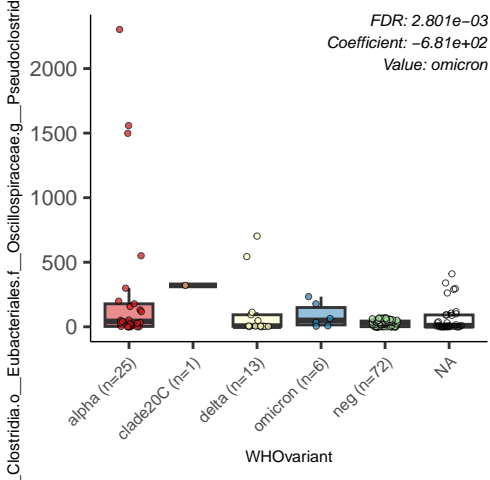

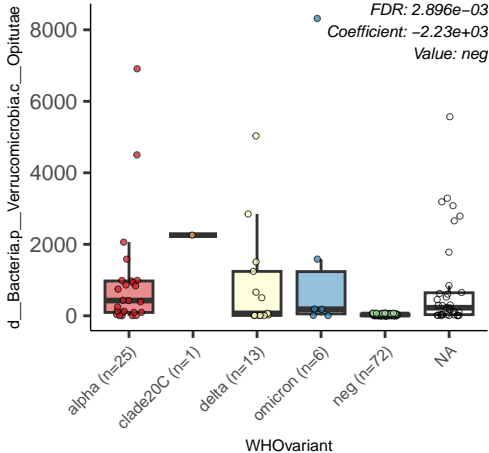

Actinobacteria.c\_\_Actinomycetia.o\_\_Pseudonocardiales.f\_\_Pseudo

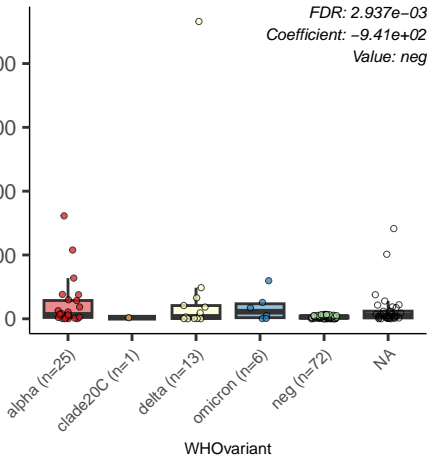

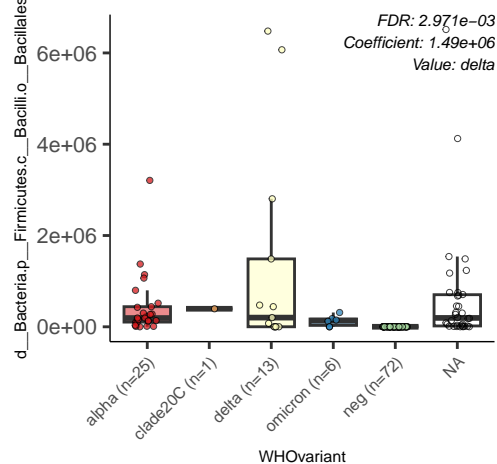

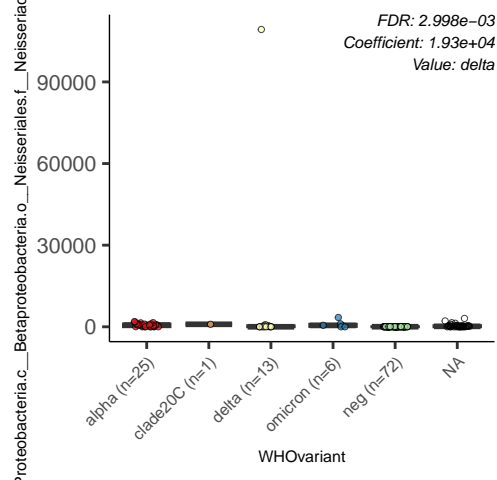



p\_\_Proteobacteria.c\_\_Alphaproteobacteria.o\_\_Hyphomicrobiales.f

FDR:  $3.053e-03$   
Coefficient:  $-1.89e+02$   
Value: neg

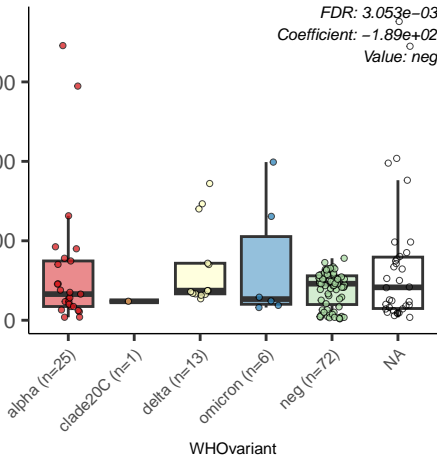

Cyanobacteria.c\_\_Gloeobacteria.o\_\_Gloeobacterales.f\_\_Gloeoba

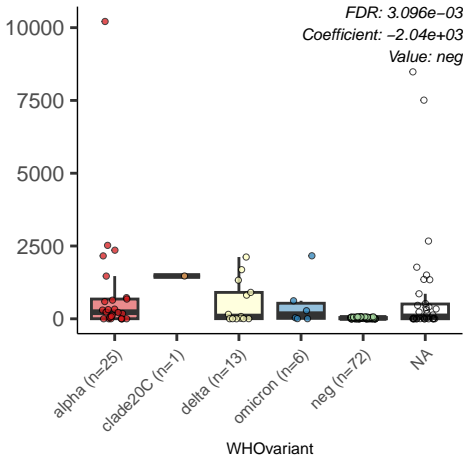

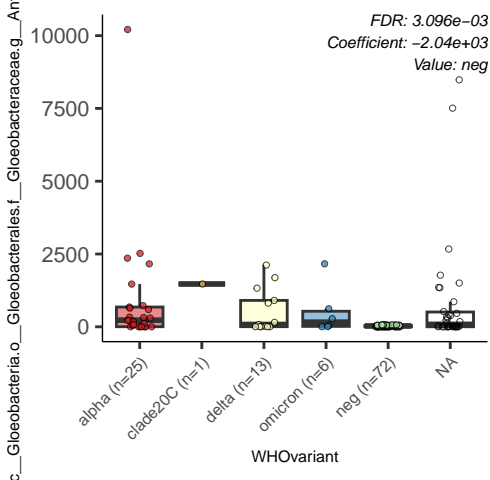

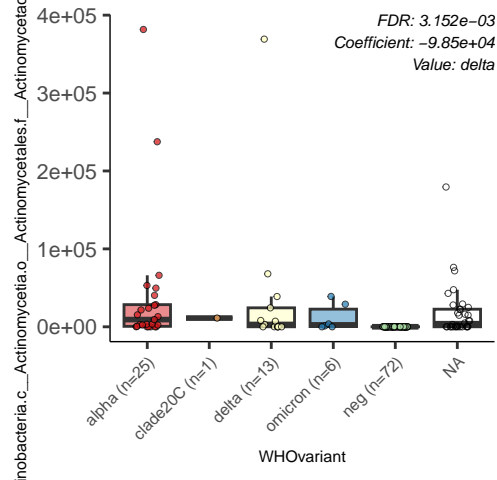

tertia.p\_\_Proteobacteria.c\_\_Alphaproteobacteria.o\_\_Hyphomicrobia

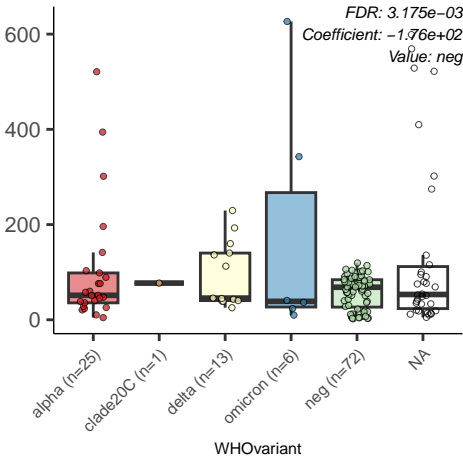

obacteria.c\_Actinomycetia.o\_Actinomycetales.f\_Actinomycetaceae

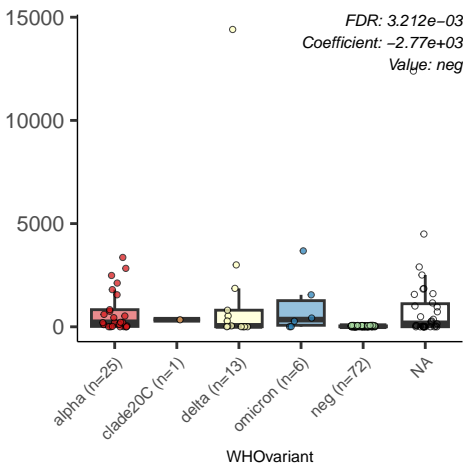

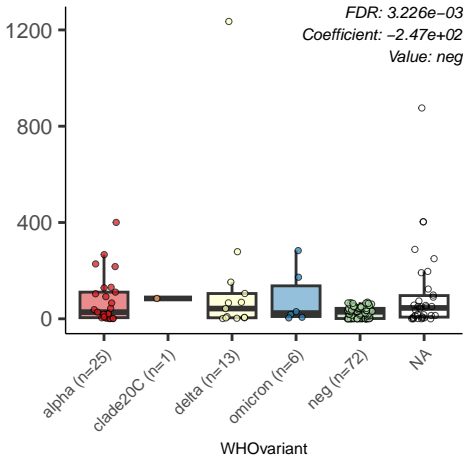

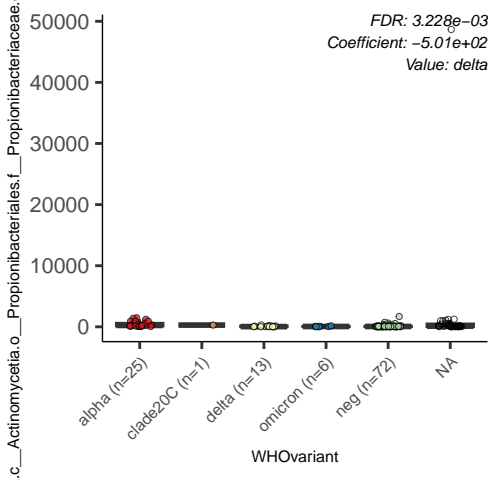



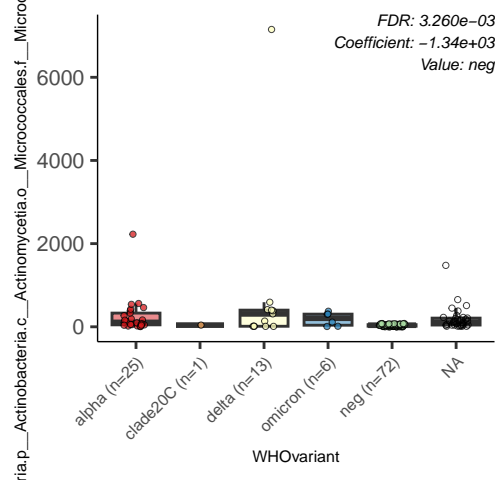

acteria.c\_\_Actinomycetia.o\_\_Actinomycetales.f\_\_Actinomycetaceae

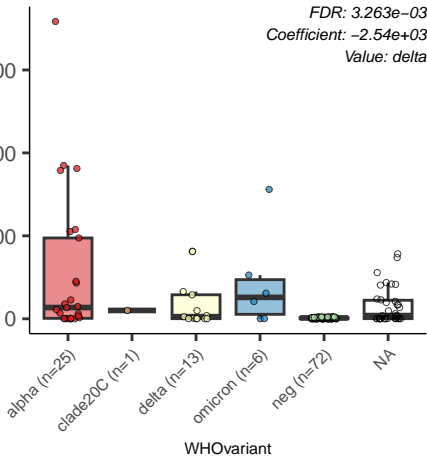

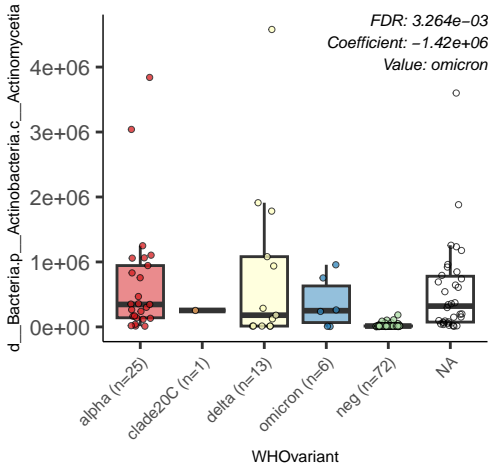

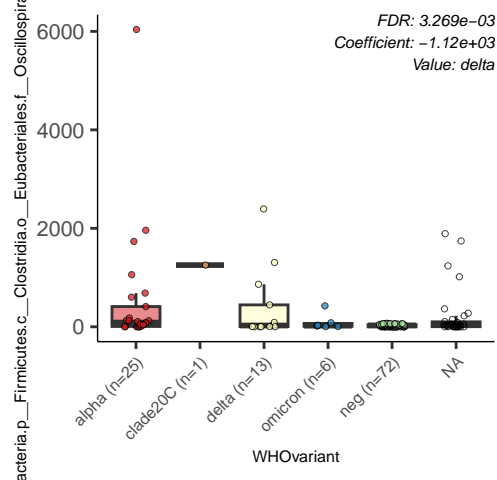

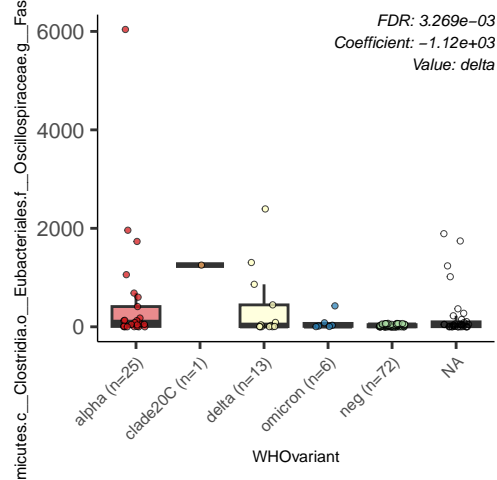

d\_\_Bacteria.p\_\_Verrucomicrobia.c\_\_Opitutae.o\_\_Puniceib

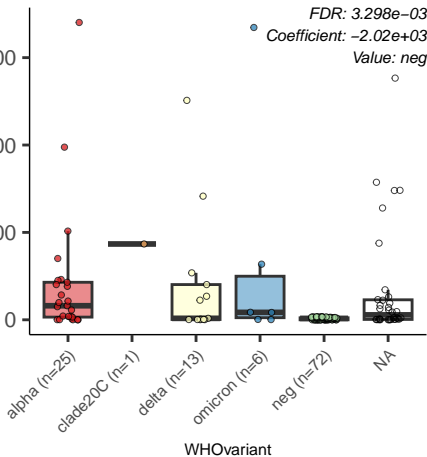

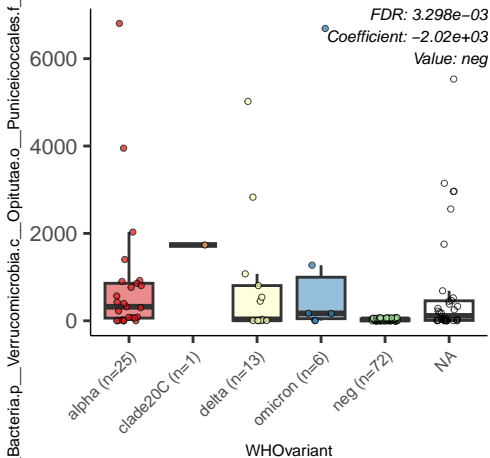

rmicutes.c\_\_Clostridia.o\_\_Eubacteriales.f\_\_Lachnospiraceae.g\_\_Ar

FDR: 3.298e-03  
Coefficient: -2.11e+03  
Value: omicron

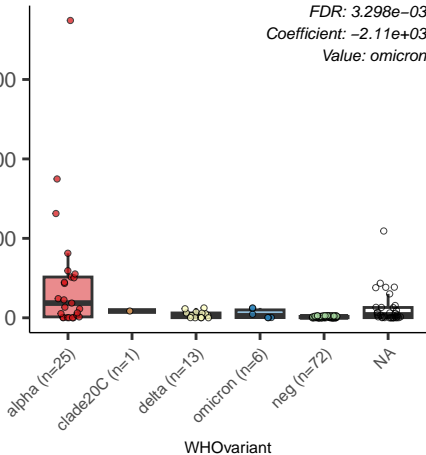



bacteria.p\_\_Firmicutes.c\_\_Clostridia.o\_\_Eubacteriales.f\_\_Clostridia

FDR:  $3.305e-03$   
Coefficient:  $-7.01e+02$   
Value: omicron

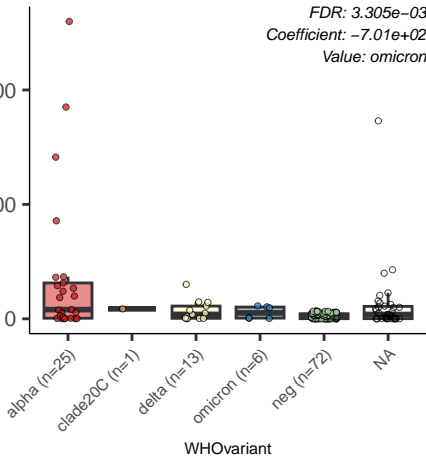

nicutes.c\_\_Clostridia.o\_\_Eubacteriales.f\_\_Clostridiaceae.g\_\_Serper

*FDR: 3.305e-03*  
*Coefficient: -7.01e+02*  
*Value: omicron*

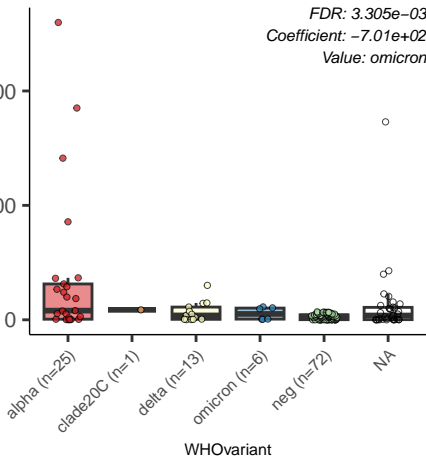

i.p.\_Bacteroidetes.c\_Flavobacteriia.o\_Flavobacteriales.f\_\_Weeks

FDR:  $3.319 \times 10^{-3}$   
Coefficient:  $-1.91 \times 10^2$   
Value: delta

1000

500

0

alpha (n=25)

clade20C (n=1)

delta (n=13)

omicron (n=6)

neg (n=72)

NA

WHOvariant

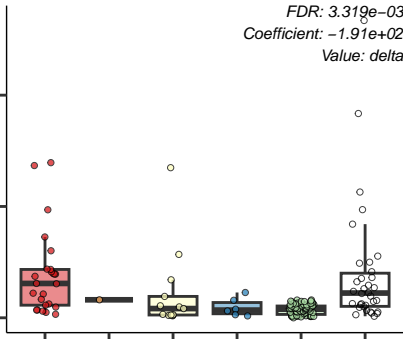

\_Bacteria.p\_Firmicutes.c\_Clostridia.o\_Eubacteriales.f\_Lachnosp

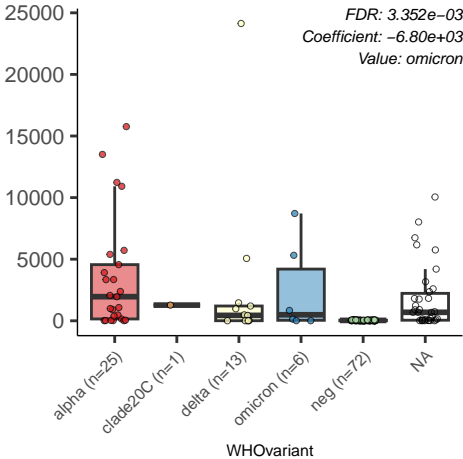

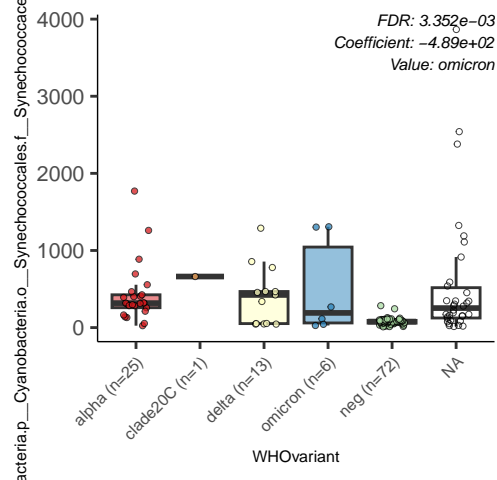

\_\_Bacteria.p\_\_Bacteroidetes.c\_\_Flavobacteriia.o\_\_Flavobacteriales

FDR:  $3.360e-03$   
Coefficient:  $-2.36e+02$   
Value: omicron

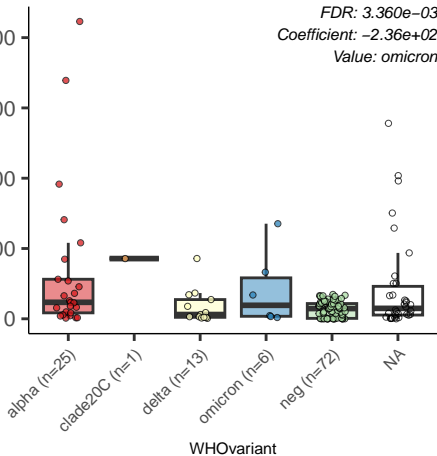

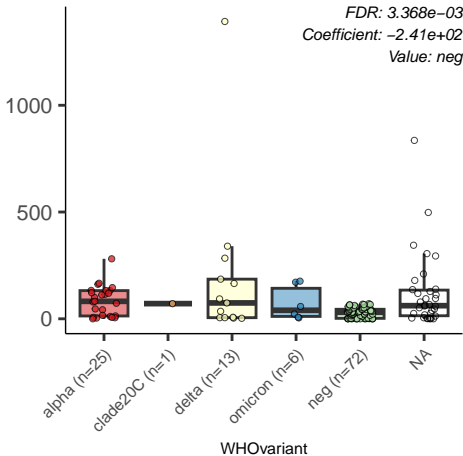

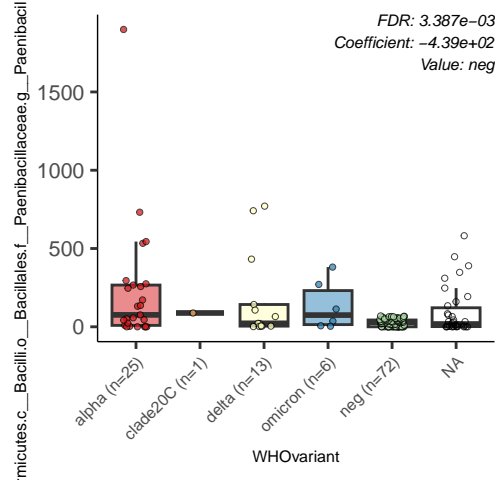



FDR:  $3.393e-03$   
Coefficient:  $-1.24e+03$   
Value: neg

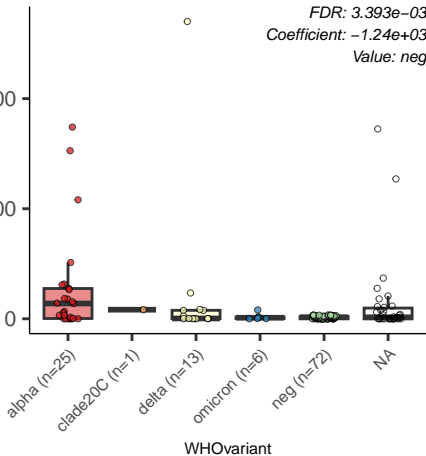

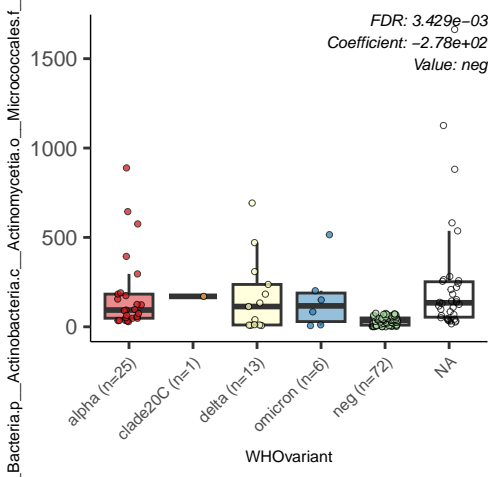

d\_Bacteria.p\_\_Cyanobacteria.o\_\_Synechococcales.f\_\_Synech

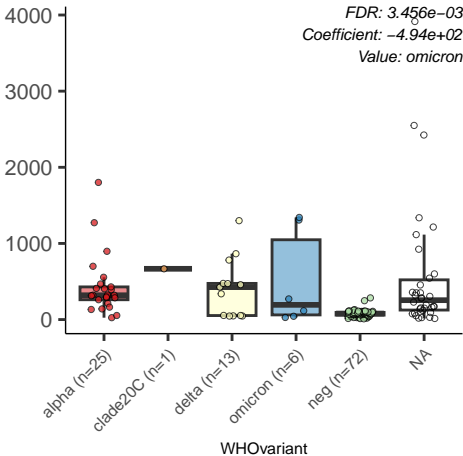

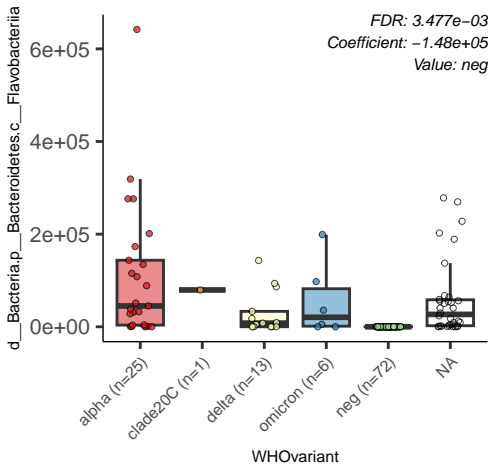

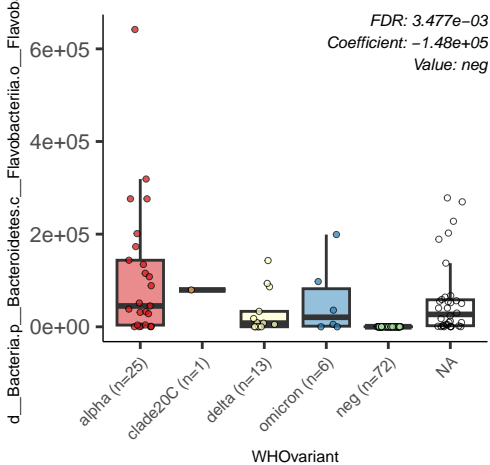

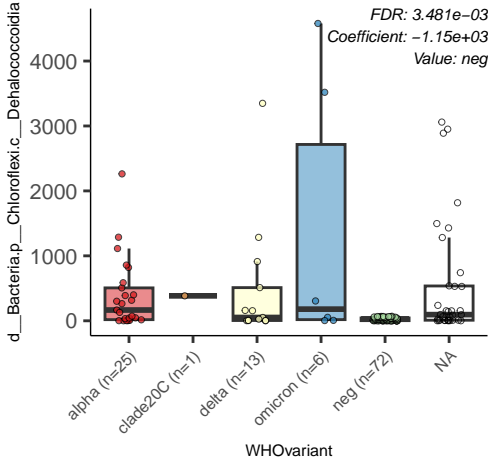

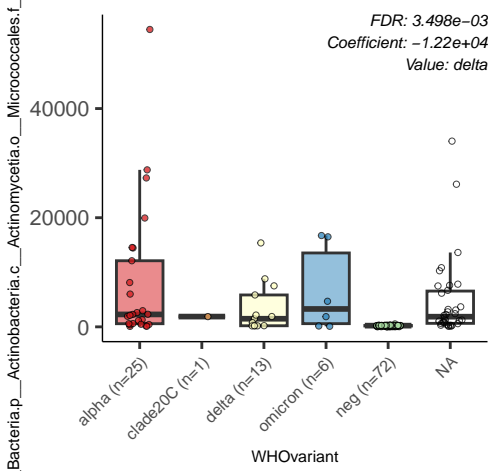

micutes.c\_\_Bacilli.o\_\_Lactobacillales.f\_\_Streptococcaceae.g\_\_Streptococcus

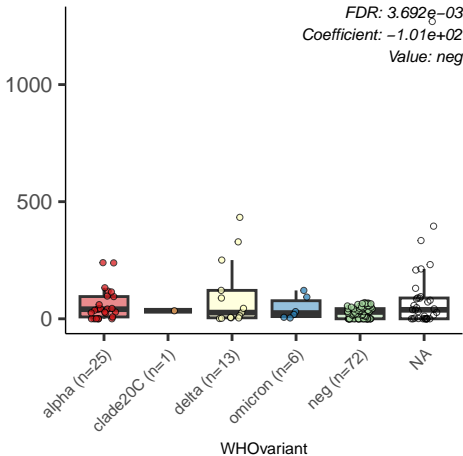



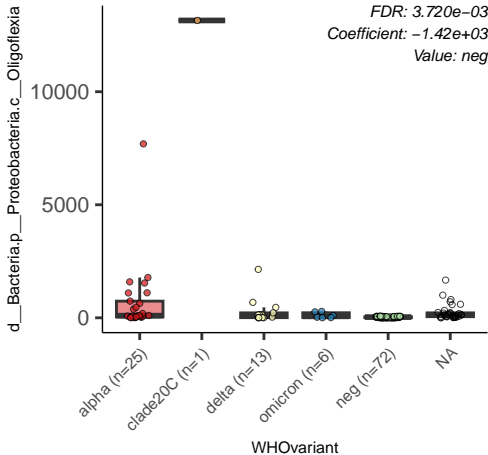

d\_\_Bacteria.p\_\_Firmicutes.c\_\_Tissierellia

FDR: 3.790e-03  
Coefficient: -1.84e+04  
Value: omicron

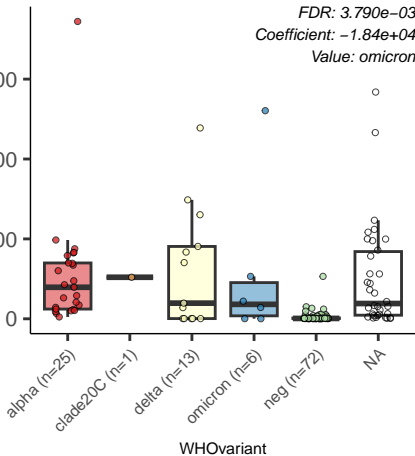

terial.p\_\_Bacteroidetes.c\_\_Bacteroidia.o\_\_Marinilabiales.f\_\_Marinil

$FDR: 3.793e-03$   
 $Coefficient: -1.48e+02$   
 $Value: delta$

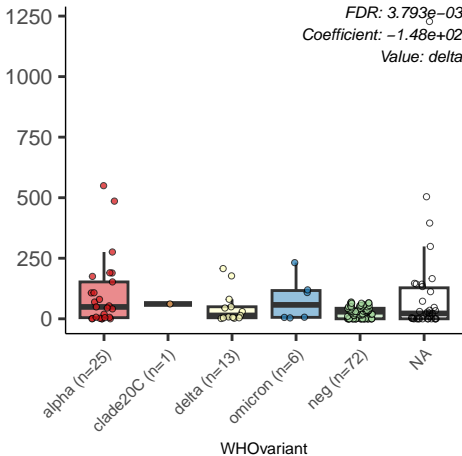

eroidetes.c\_\_Bacteroidia.o\_\_Marinilabiales.f\_\_Marinilabiales

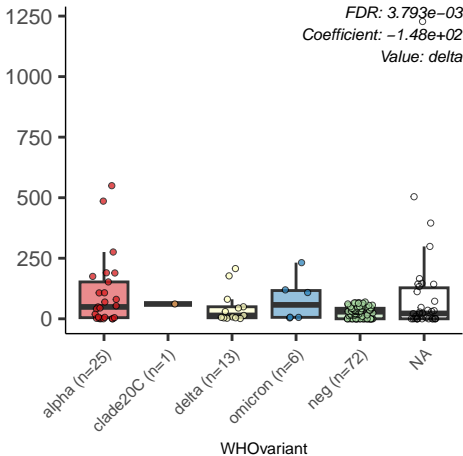

acteria.p\_Firmicutes.c\_Bacilli.o\_Lactobacillales.f\_Enterococcace

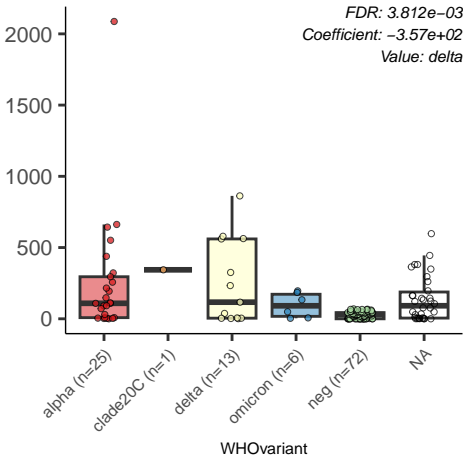

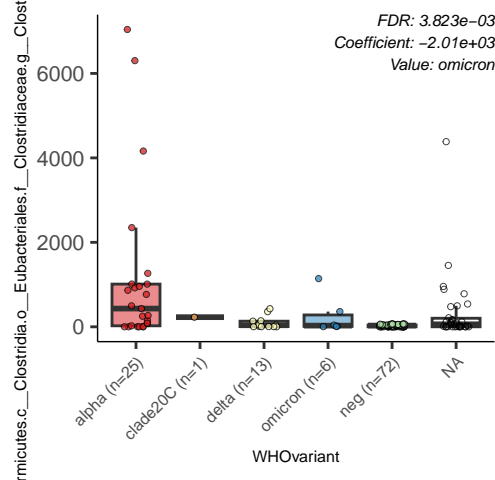

ia.p\_\_Acidobacteria.c\_\_Blastocatellia.g\_\_Chloracidobacterium.s\_\_C

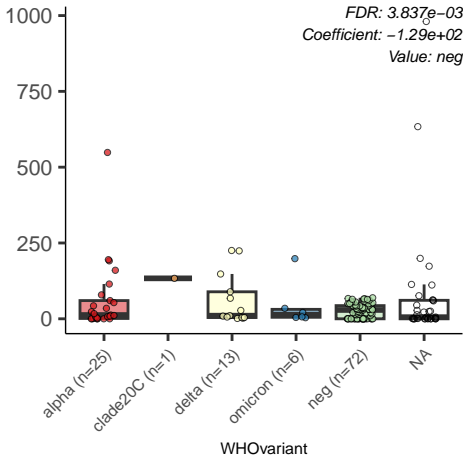

d\_Bacteria.p\_Acidobacteria

FDR: 3.880e-03

Coefficient: -1.25e+03

Value: delta

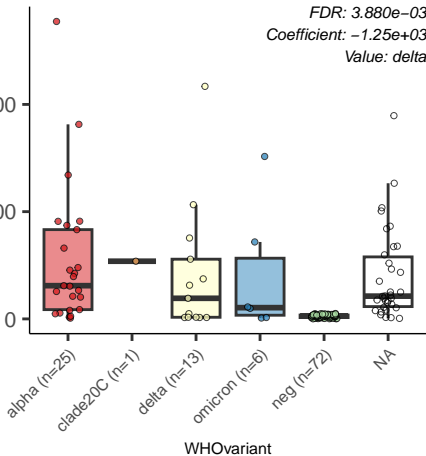



\_\_Bacteria.p\_Firmicutes.c\_Bacilli.o\_Bacillales.f\_Paenibacillace

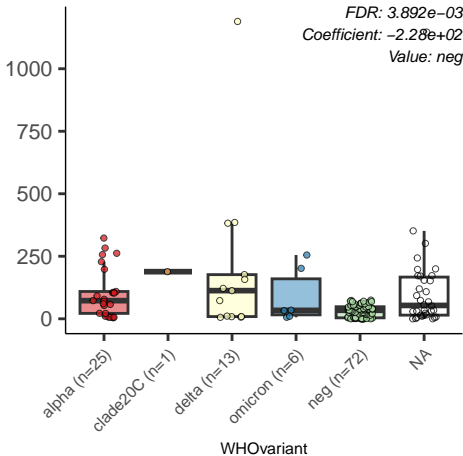

acteria.p\_\_Firmicutes.c\_\_Bacilli.o\_\_Lactobacillales.f\_\_Enterococcca

FDR: 3.892e-03  
Coefficient: -2.29e+03  
Value: neg

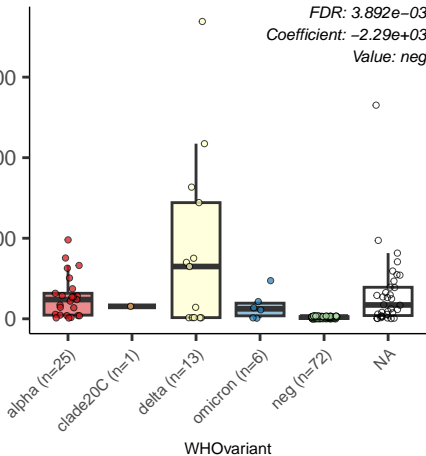



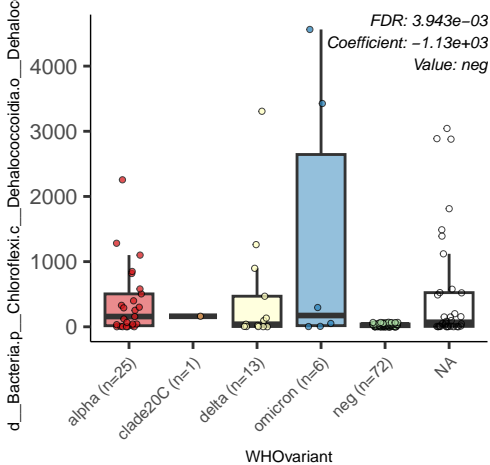

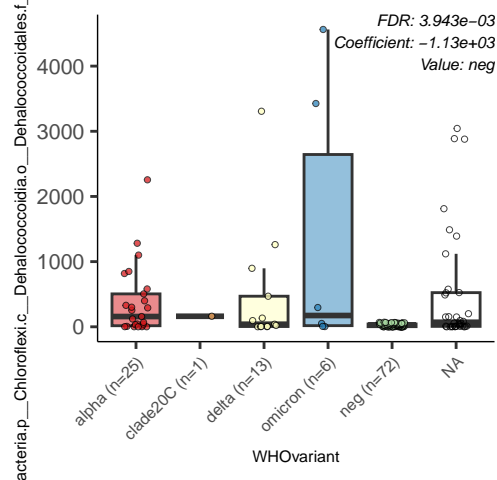

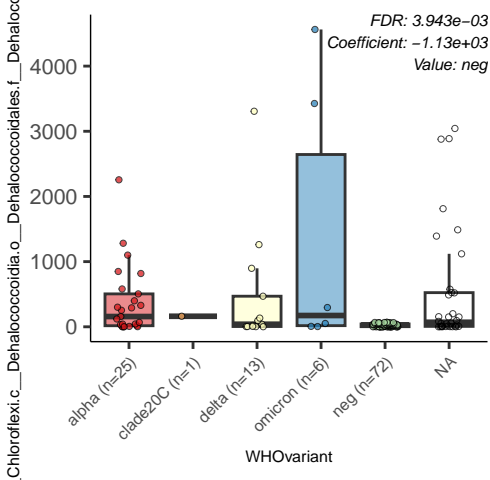

Firmicutes.c\_\_Clostridia.o\_\_Eubacteriales.f\_\_Oscillospiraceae.g\_\_A

*FDR: 3.962e-03*  
*Coefficient: -6.49e+02*  
*Value: delta*

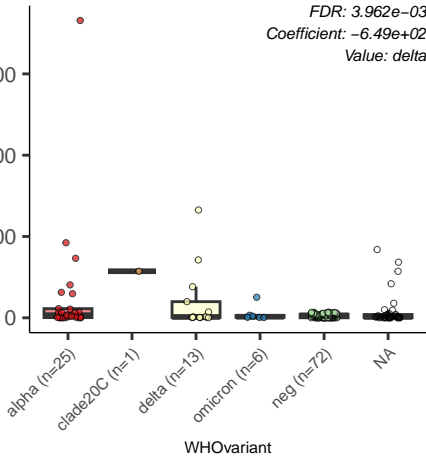

utes.c\_\_Clostridia.o\_\_Eubacteriales.f\_\_Lachnospiraceae.g\_\_Anaeroc

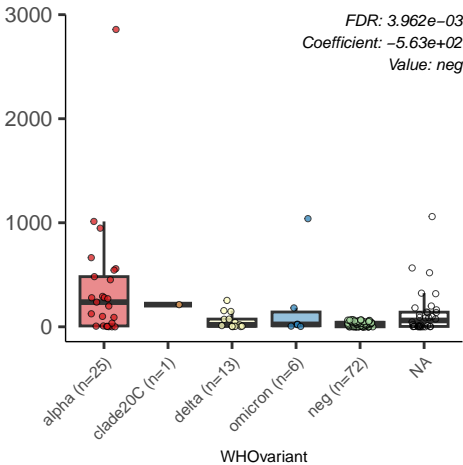



es.c\_\_Clostridia.o\_\_Eubacteriales.f\_\_Lachnospiraceae.g\_\_Anaerob

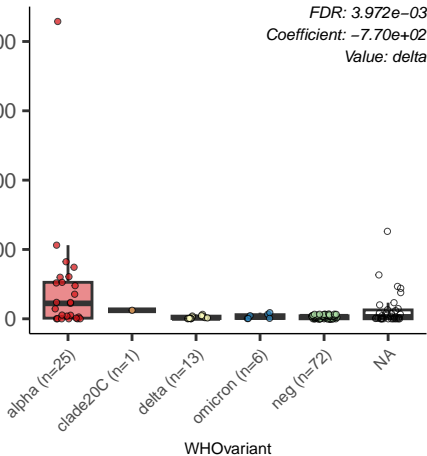

Gammaproteobacteria.o\_\_Pseudomonadales.f\_\_Pseudomonadaceae

FDR:  $4.028e-03$   
Coefficient:  $-2.16e+02$   
Value: neg

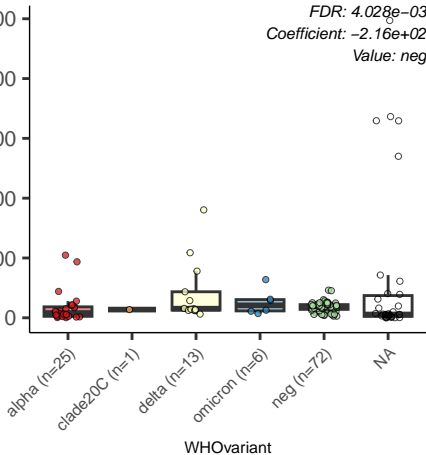

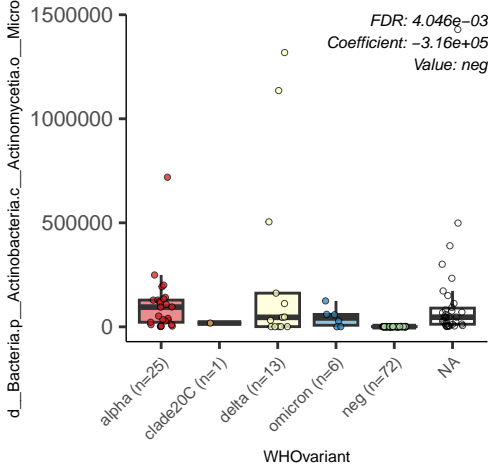

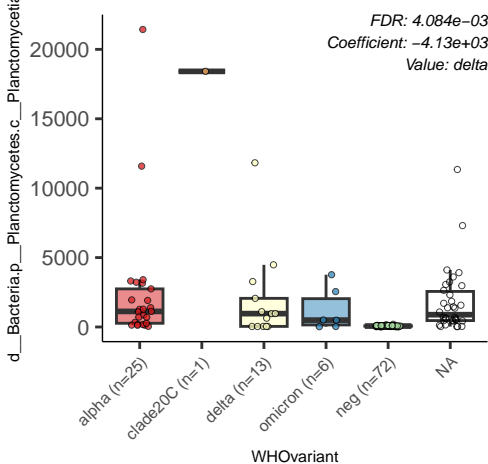

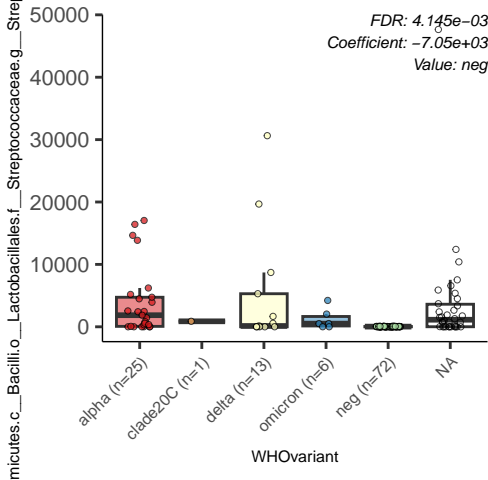

bacteria.c\_Actinomycetia.o\_Actinomycetales.f\_Actinomycetaceae

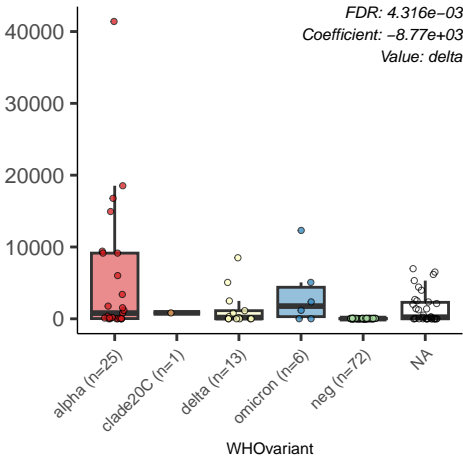

teroidetes.c\_Bacteroidia.o\_Bacteroidales.f\_Bacteroidaceae.g\_E

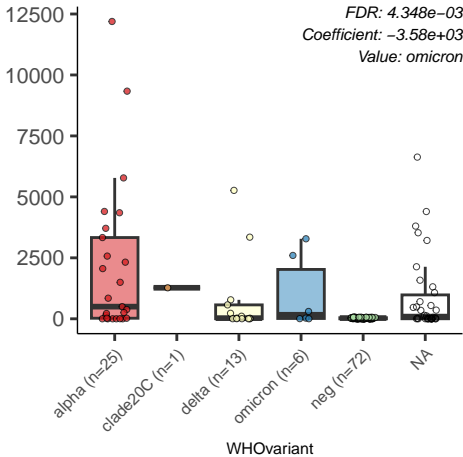

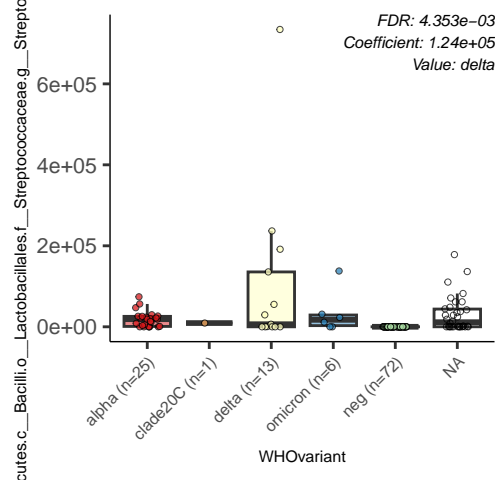



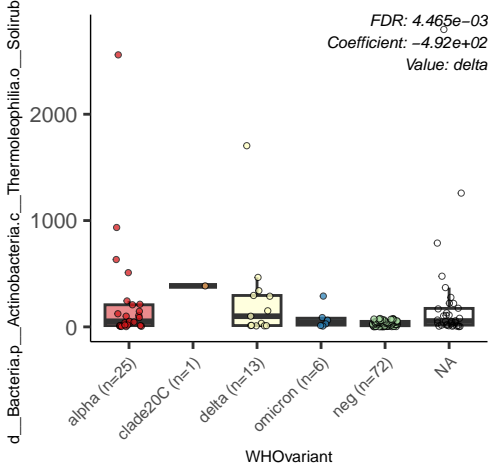

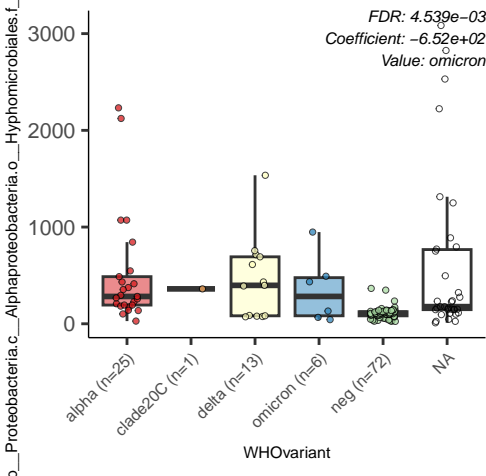

Tenericutes.c\_\_Mollicutes.o\_\_Mycoplasmatales.f\_\_Mycoplasmataceae

FDR:  $4.561e-03$   
Coefficient:  $-2.58e+02$   
Value: omicron

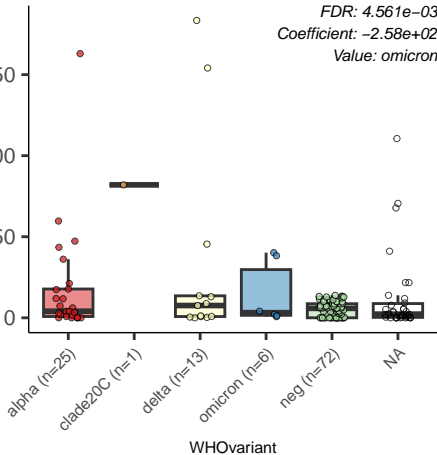

tes.o\_\_Mycoplasmatales.f\_\_Mycoplasmataceae.g\_\_Candidatus.Hep

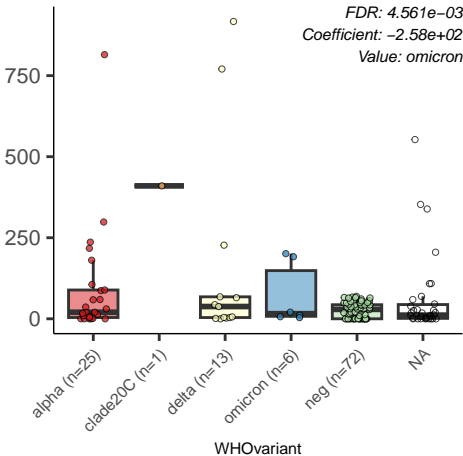

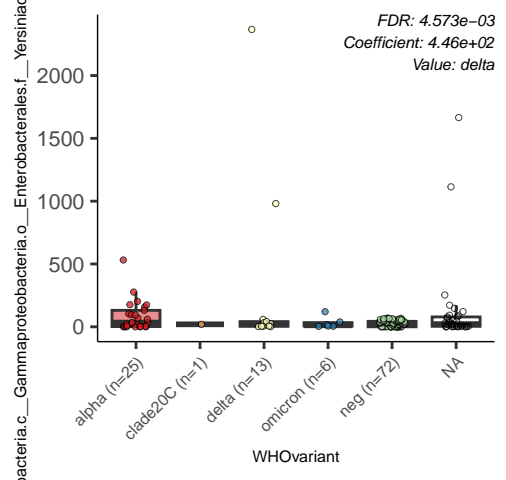

micutes.c\_\_Bacilli.o\_\_Lactobacillales.f\_\_Streptococcaceae.g\_\_Strep

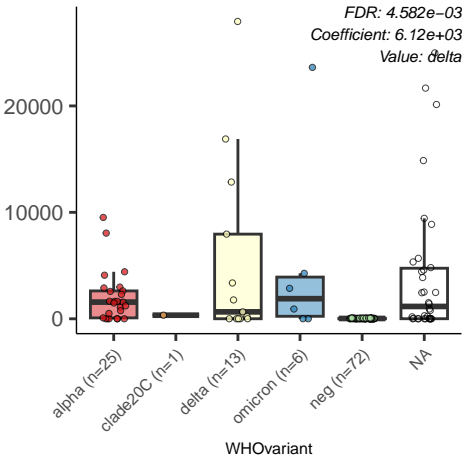

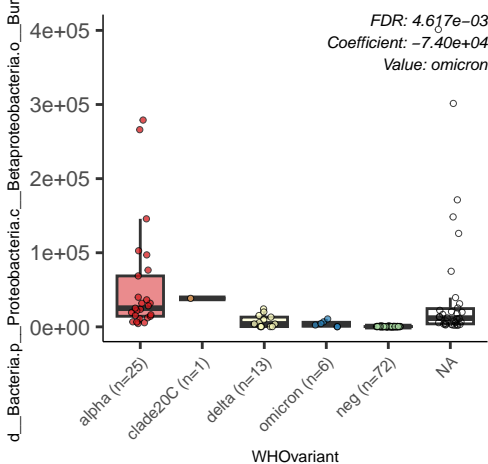

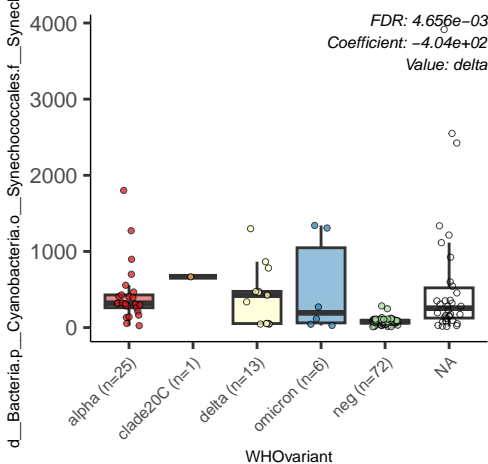



FDR:  $4.693e-03$   
Coefficient:  $-5.10e+02$   
Value: neg

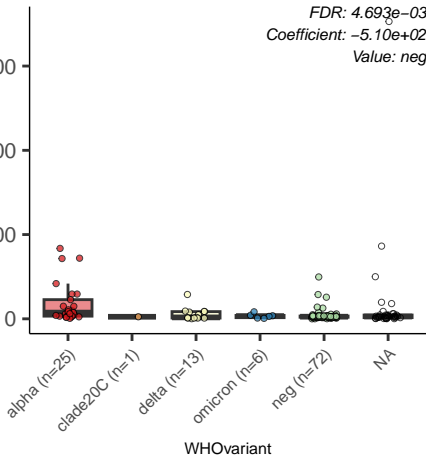

a.p\_\_Firmicutes.c\_\_Erysipelotrichia.o\_\_Erysipelotrichales.f\_\_Erysipe

FDR:  $4.751e-03$   
Coefficient:  $-4.50e+02$   
Value: neg

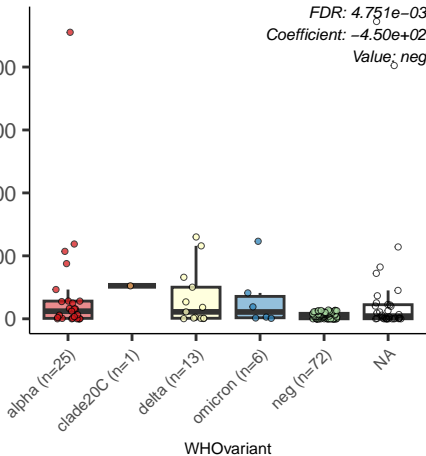

tes.c\_\_Erysipelotrichia.o\_\_Erysipelotrichales.f\_\_Erysipelotrichaceae

FDR:  $4.751e-03$   
Coefficient:  $-4.50e+02$   
Value: neg

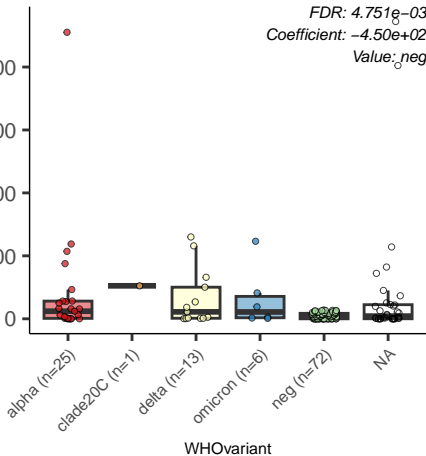

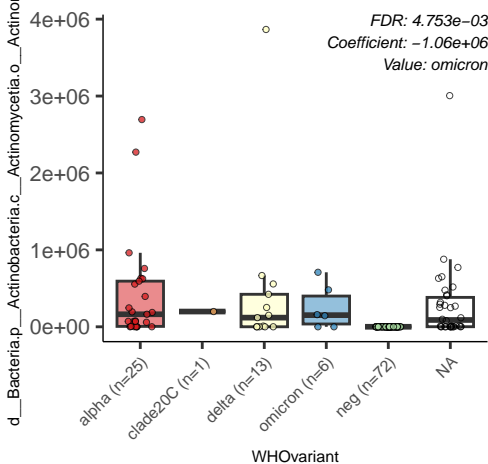

Bacteria.p\_Actinobacteria.c\_Actinomycetia.o\_Actinomycetales.f

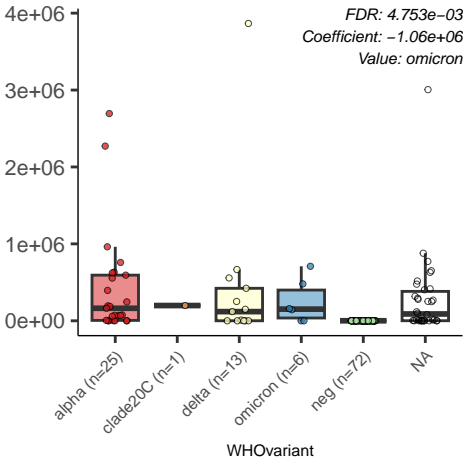

bacteria.c\_\_Betaproteobacteria.o\_\_Neisseriales.f\_\_Neisseriaceae.g

*FDR: 4.785e-03*  
*Coefficient: 5.71e+03*  
*Value: delta*

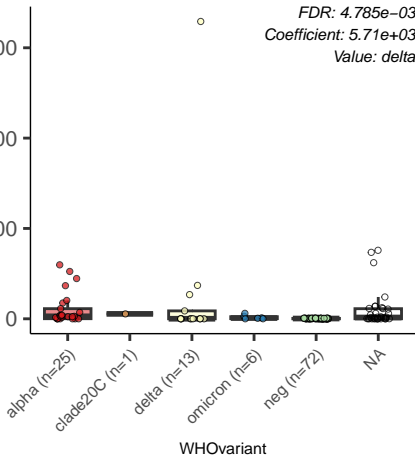

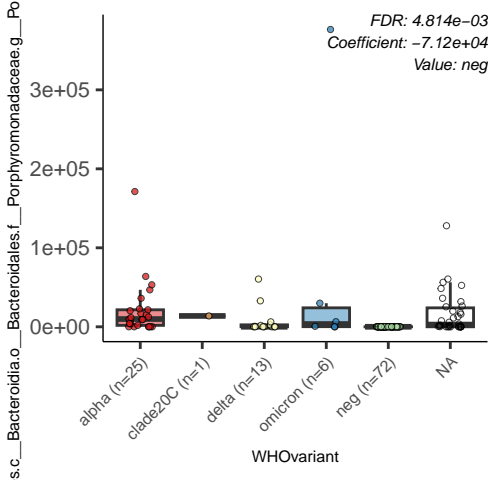

eria.p\_\_Bacteroidetes.c\_\_Flavobacteriia.o\_\_Flavobacteriales.f\_\_We

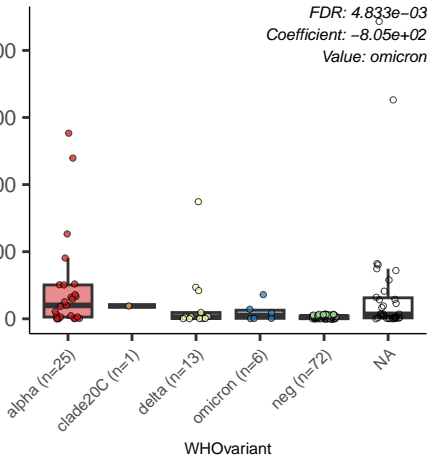



bacteria.p\_\_Cyanobacteria.o\_\_Synechococcales.f\_\_Synechococcaceae

$FDR: 4.852e-03$   
 $Coefficient: -3.97e+02$   
 $Value: delta$

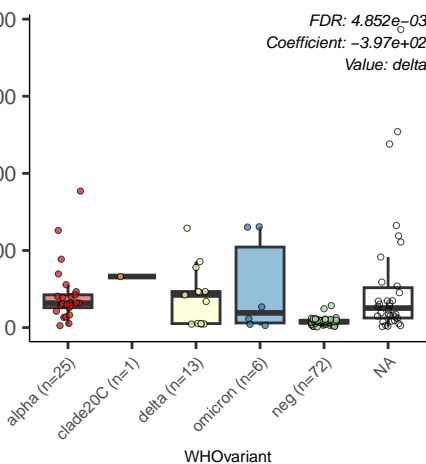

d\_Bacteria.p\_Fusobacteria

FDR:  $4.891e-03$   
Coefficient:  $-4.32e+05$   
Value: delta

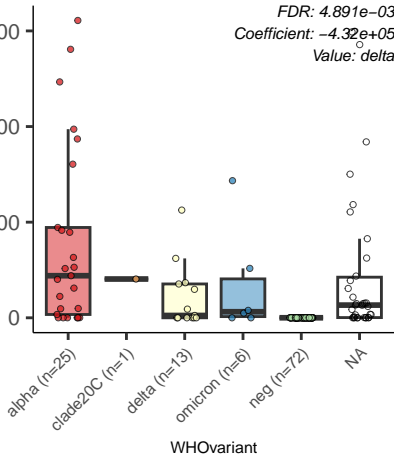

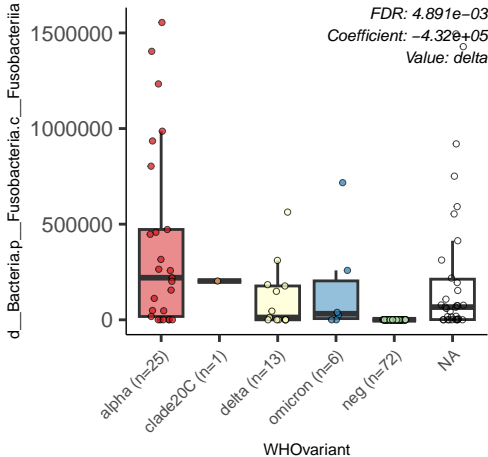

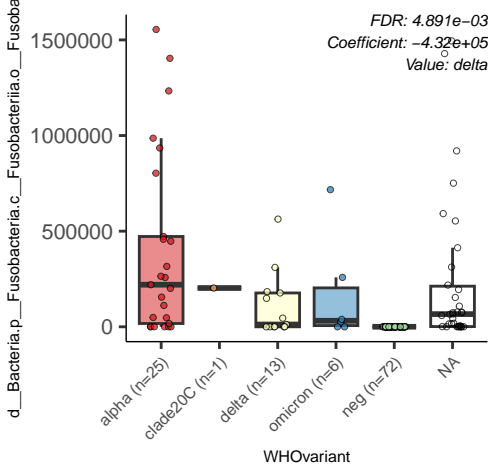

obacteria.c\_\_Betaproteobacteria.o\_\_Burkholderiales.f\_\_Comamonad

FDR:  $4.917e-03$   
Coefficient:  $1.71e+03$   
Value: clade20C

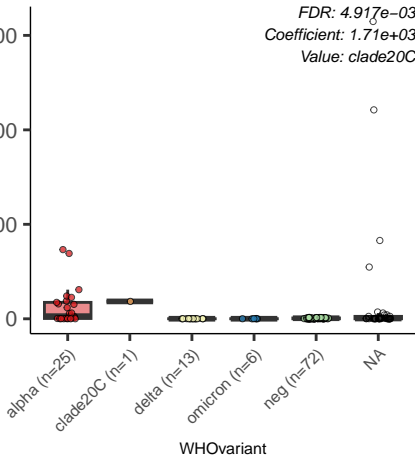

cteroidetes.c\_\_Flavobacteriia.o\_\_Flavobacteriales.f\_\_Weeksellaceae

FDR:  $4.918e-03$   
Coefficient:  $-1.71e+03$   
Value: neg

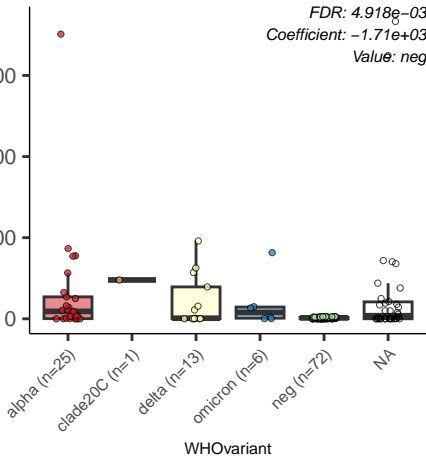

o\_Actinobacteria.c\_Actinomycetia.o\_Micrococcales.f\_Dermaba

*FDR: 5.067e-03*  
*Coefficient: -1.58e+02*  
*Value: neg*

1000

500

0

alpha (n=25)

clade20C (n=1)

delta (n=13)

omicron (n=6)

neg (n=72)

NA

WHOvariant

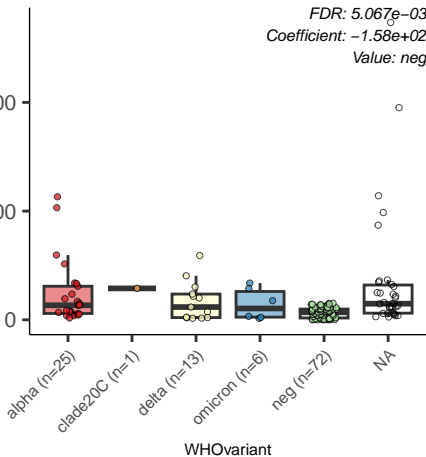

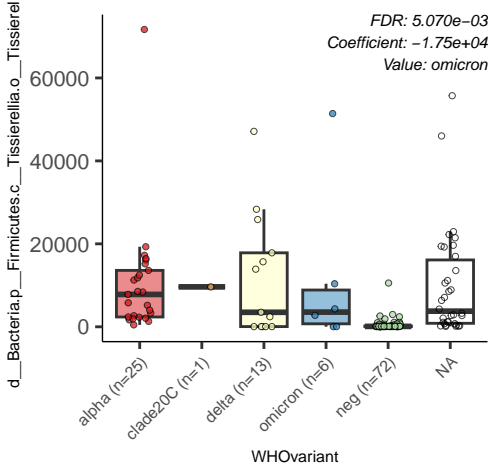



a.p\_\_Tenericutes.c\_\_Mollicutes.o\_\_Acholeplasma.tales.f\_\_Acholeplasma

1000

500

0

alpha (n=25)

clade20C (n=1)

delta (n=13)

omicron (n=6)

neg (n=72)

NA

WHOvariant

FDR: 5.076e-03  
Coefficient: -2.29e+02  
Value: delta

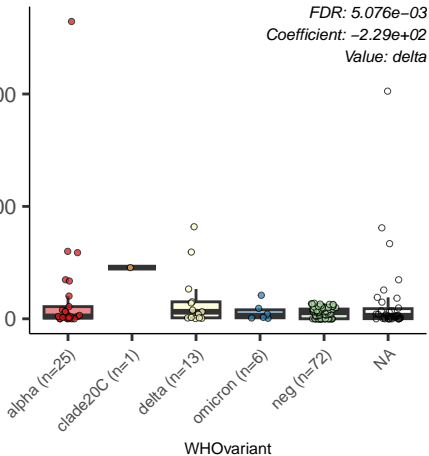

FDR: 5.076e-03  
Coefficient: -2.29e+02  
Value: delta

1000

500

0

alpha (n=25)

clade20C (n=1)

delta (n=13)

omicron (n=6)

neg (n=72)

NA

WHOvariant

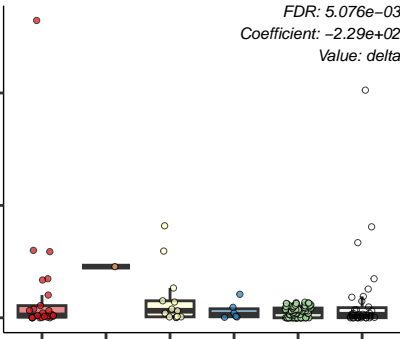

Value: neg

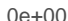

neg (n=72)

NA

WHOvariant

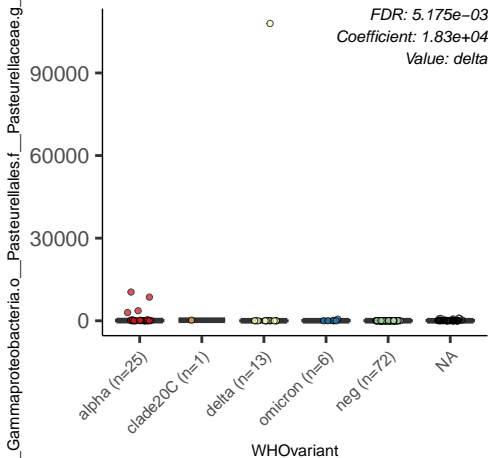

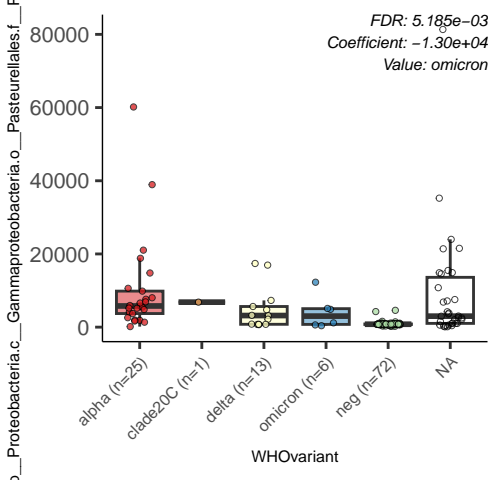

d\_Bacteria.p\_Firmicutes.c\_Bacilli.o\_Lactobacillales.f\_Ent

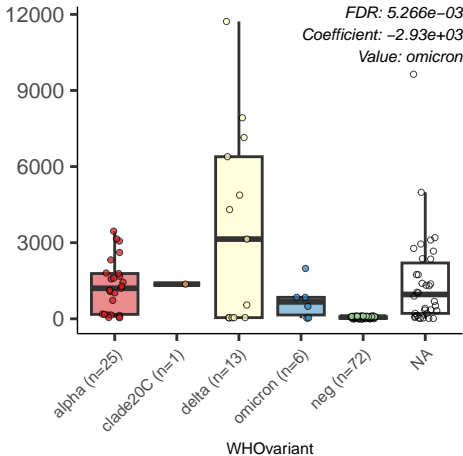

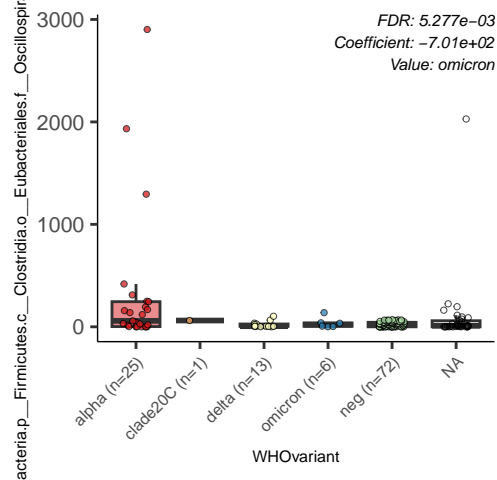

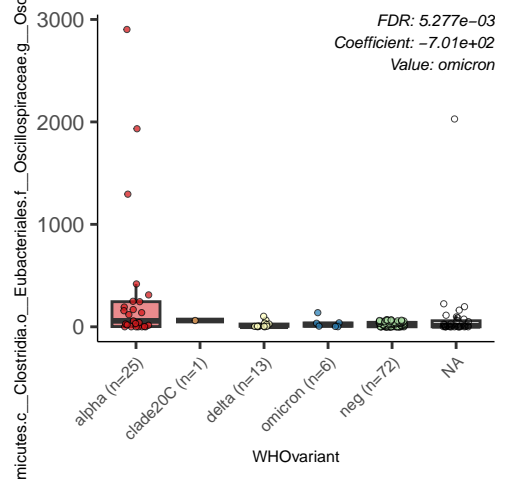



d\_Bacteria.p\_\_Planctomycetes

FDR: 5.284e-03

Coefficient: -4.08e+03

Value: delta

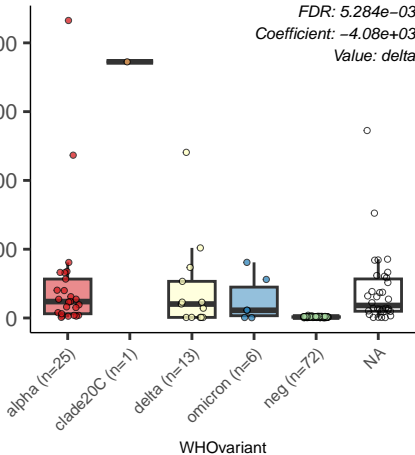

WHOvariant

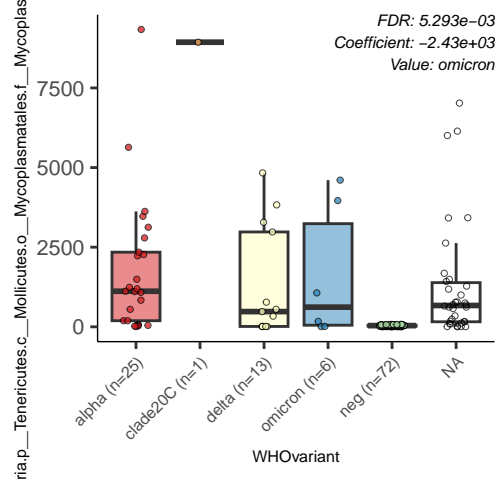

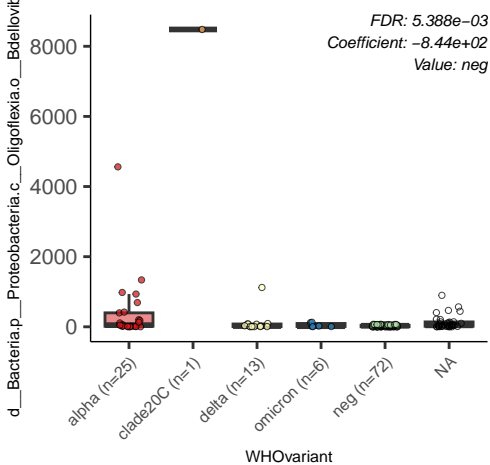

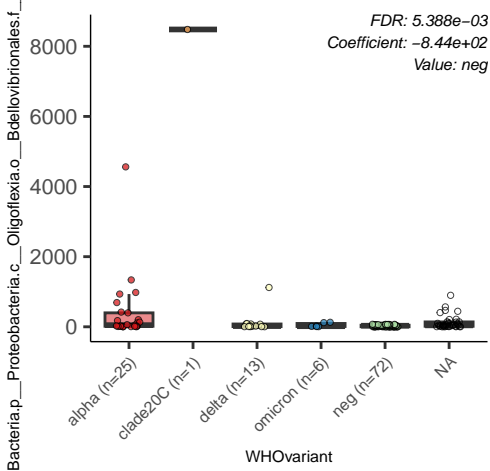

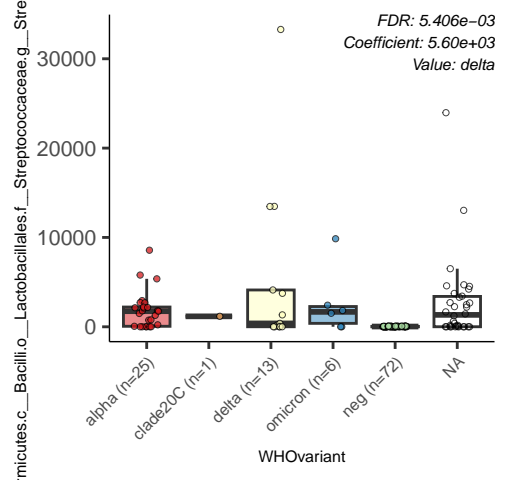

eria.p\_\_Bacteroidetes.c\_\_Bacteroidia.o\_\_Marinilabiales.f\_\_Marinil

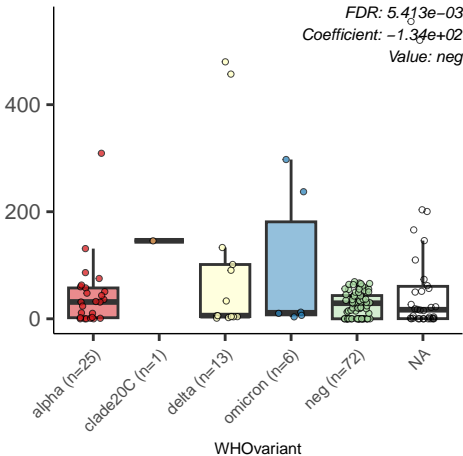

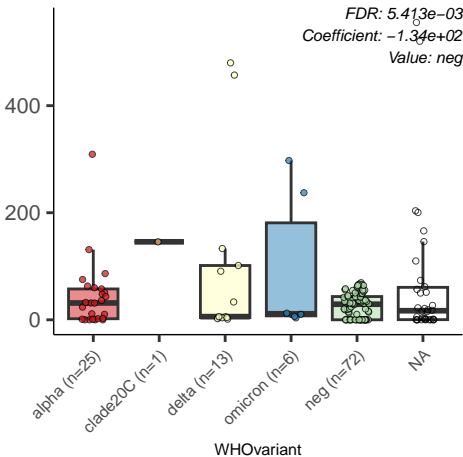

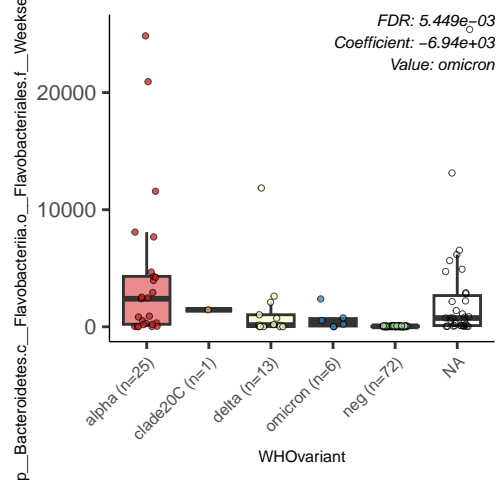



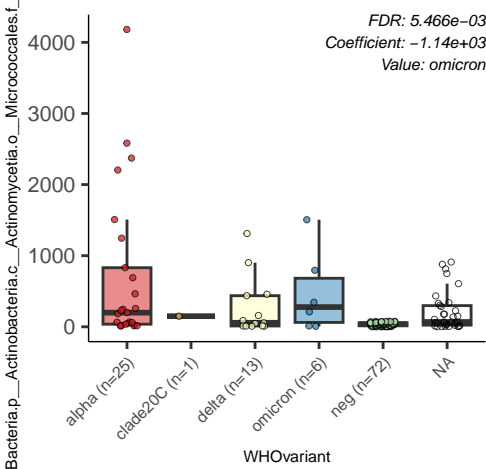

ia.p\_\_Proteobacteria.c\_\_Alphaproteobacteria.o\_\_Rickettsiales.f\_\_R

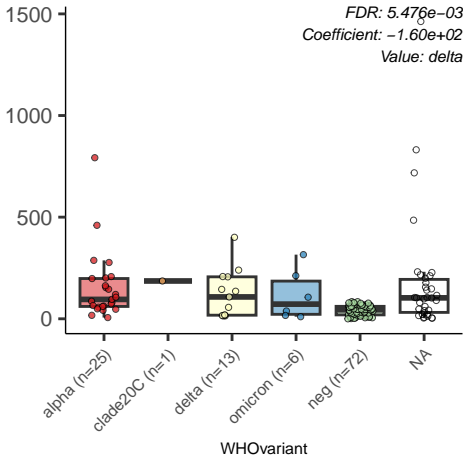

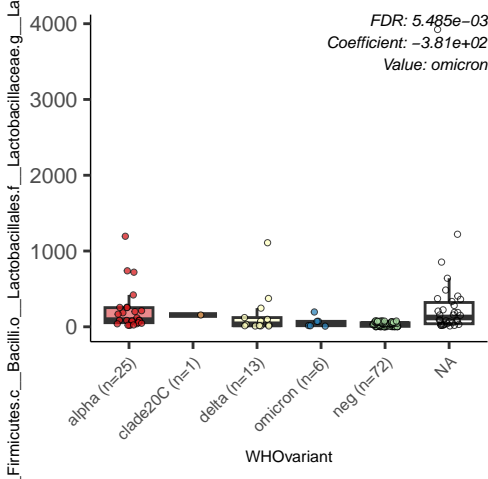

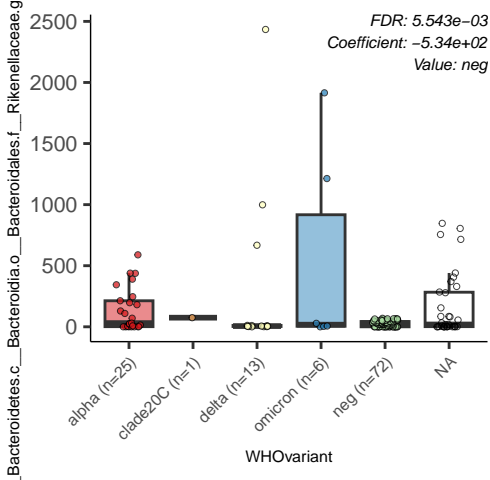

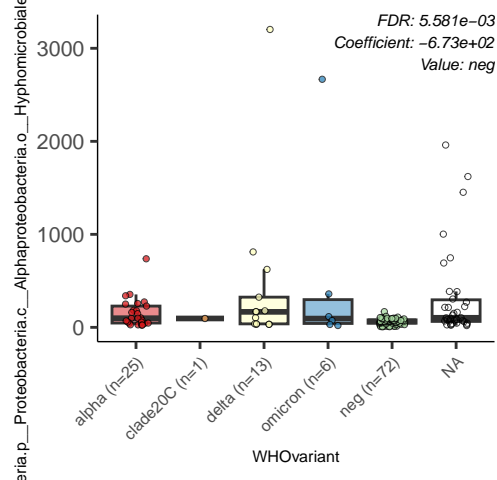

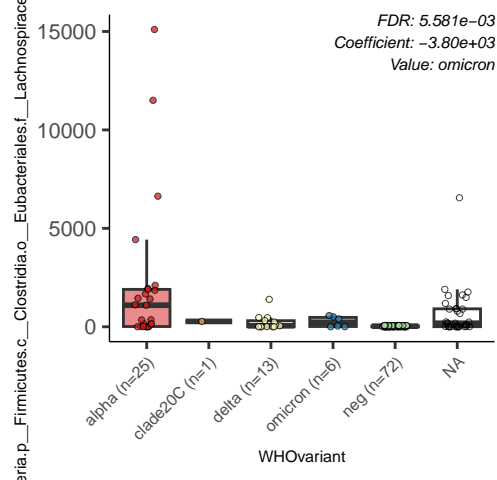

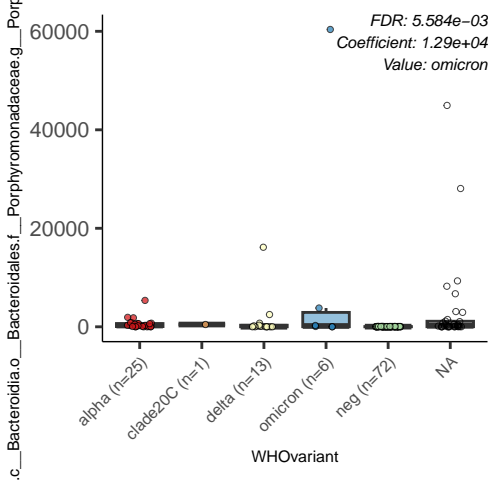

bacteria.c\_Actinomycetia.o\_Actinomycetales.f\_Actinomycetaceae

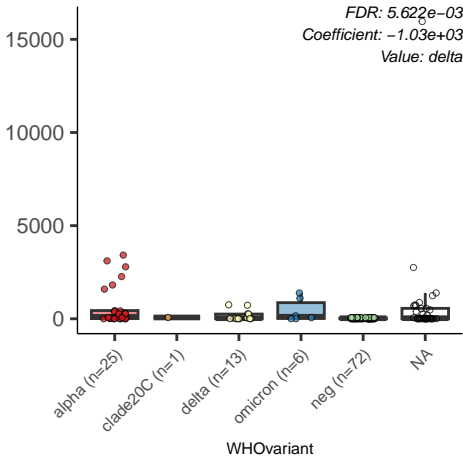



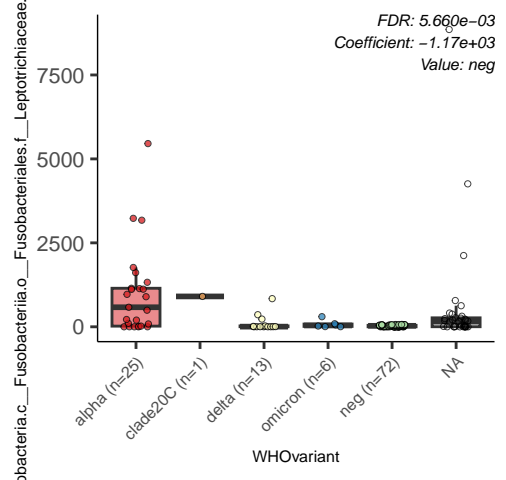

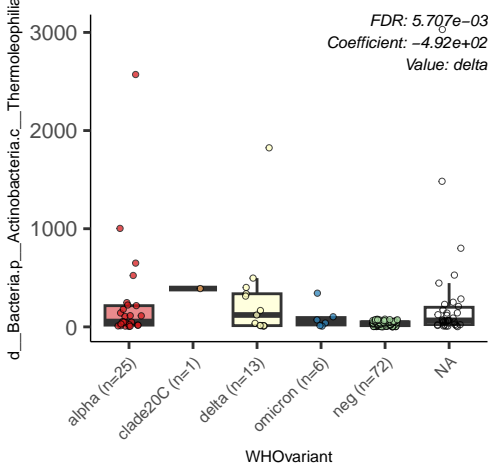

terial.p\_\_Thermotogae.c\_\_Thermotogae.o\_\_Kosmotogales.f\_\_Kosm

*FDR: 5.731e-03*  
*Coefficient: -3.92e+02*  
*Value: neg*

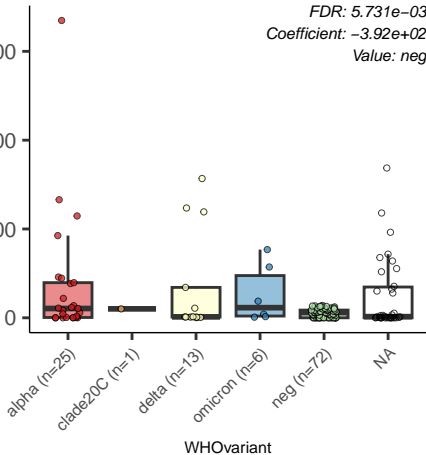

Bacteroidetes.c\_\_Bacteroidia.o\_\_Bacteroidales.f\_\_Bacteroidaceae.g

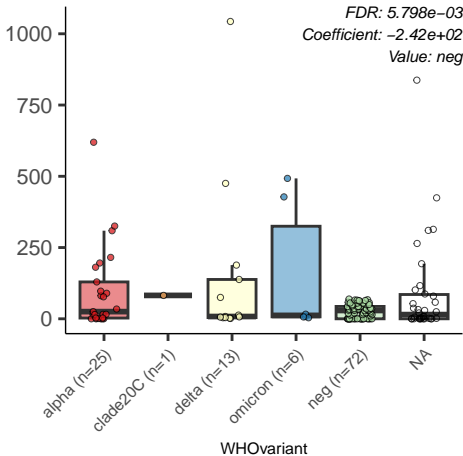

\_Bacteria.p\_Firmicutes.c\_Bacilli.o\_Bacillales.g\_Gemella.s\_Ge

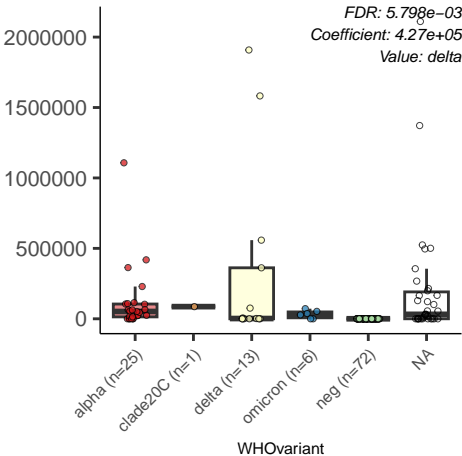

micutes.c\_\_Bacilli.o\_\_Lactobacillales.f\_\_Streptococcaceae.g\_\_Streptococcus

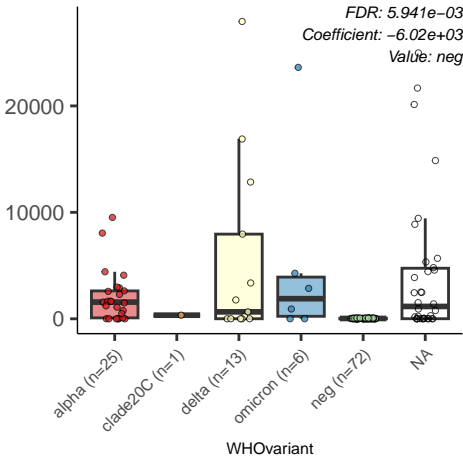

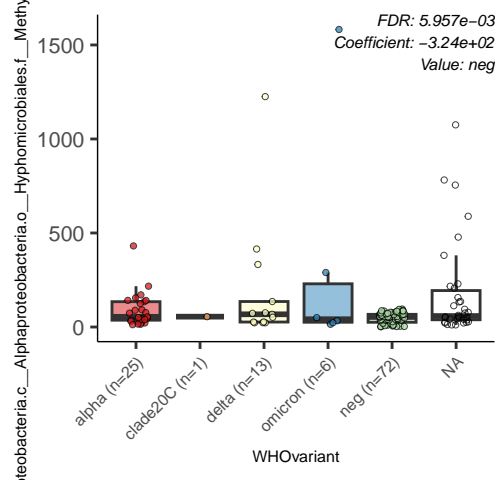

bacteria.p\_Firmicutes.c\_Clostridia.o\_Eubacteriales.f\_Peptostrept

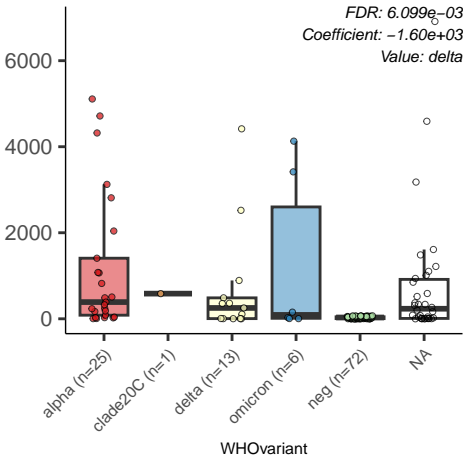



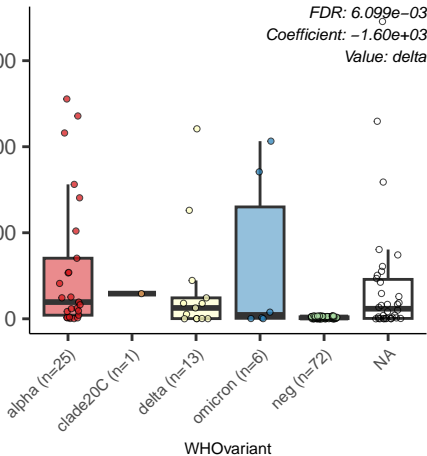

Candidatus.Saccharibacteria.c\_\_Candidatus.Saccharimonadia.o

FDR:  $6.108e-03$   
Coefficient:  $6.25e+03$   
Value: delta

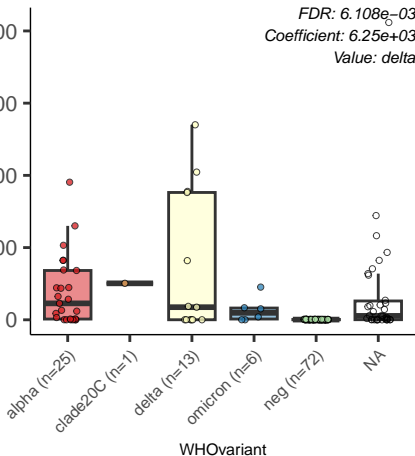

naribacteria.c\_\_Candidatus.Saccharimonadia.o\_\_Candidatus.Sacch

*FDR: 6.108e-03*  
*Coefficient: 6.25e+03*  
*Value: delta*

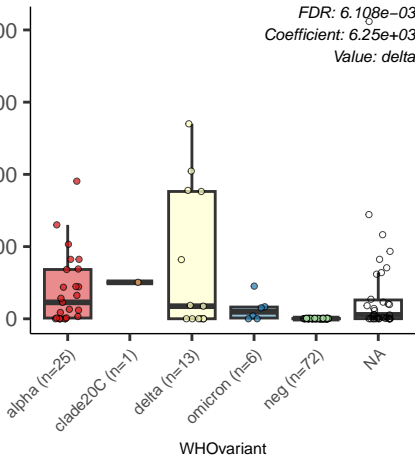

Candidatus.Saccharimonadia.o\_\_Candidatus.Saccharimonadales.f

FDR:  $6.108e-03$   
Coefficient:  $6.25e+03$   
Value: delta

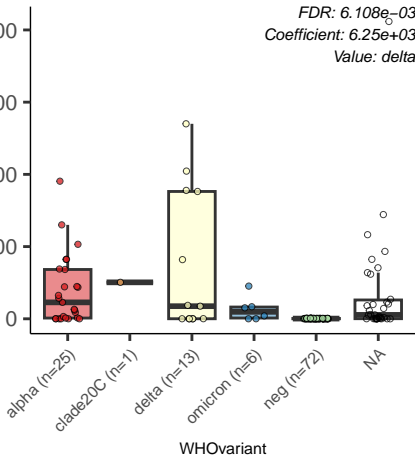

onadia.o\_\_Candidatus.Saccharimonadales.f\_\_Candidatus.Sacchari

*FDR: 6.108e-03*  
*Coefficient: 6.25e+03*  
*Value: delta*

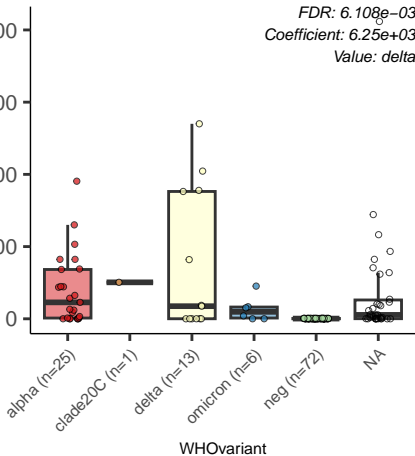

cteria.p\_\_Firmicutes.c\_\_Tissierellia.o\_\_Tissierellales.f\_\_Peptoniph

*FDR: 6.153e-03*  
*Coefficient: -1.11e+03*  
*Value: neg*

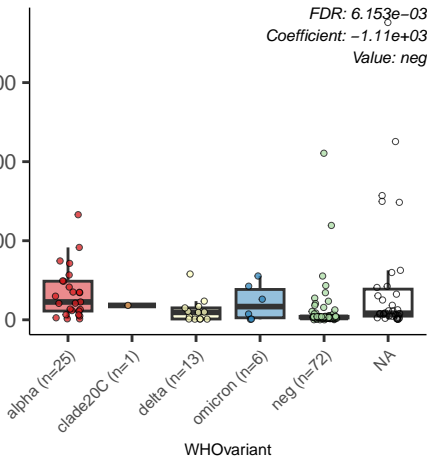

Bacteria.p\_\_Bacteroidetes.c\_\_Flavobacteriia.o\_\_Flavobacteriales.f\_\_

FDR:  $6.187e-03$   
Coefficient:  $-1.73e+02$   
Value: neg

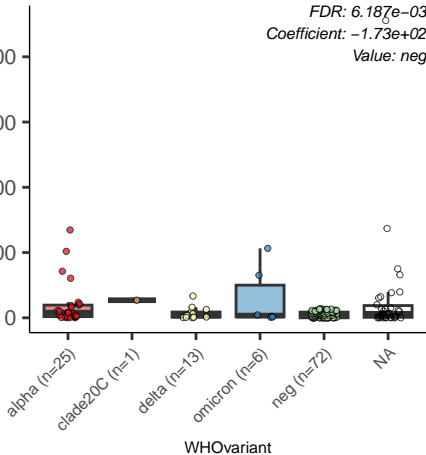

nicutes.c\_\_Bacilli.o\_\_Lactobacillales.f\_\_Streptococcaceae.g\_\_Strep

*FDR:  $6.242e-03$*   
*Coefficient:  $-5.35e+03$*   
*Value: neg*

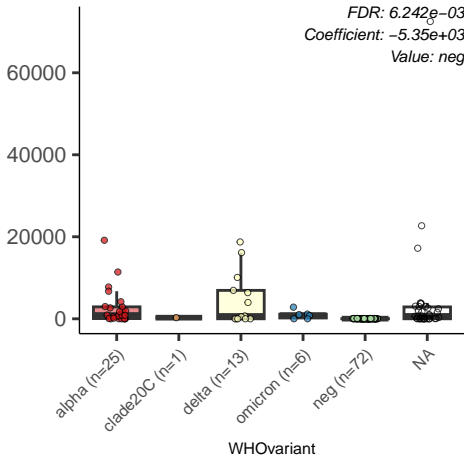



psilonproteobacteria.o\_\_Campylobacterales.f\_\_Campylobacteraceae

FDR:  $6.243e-03$   
Coefficient:  $-8.42e+02$   
Value: delta

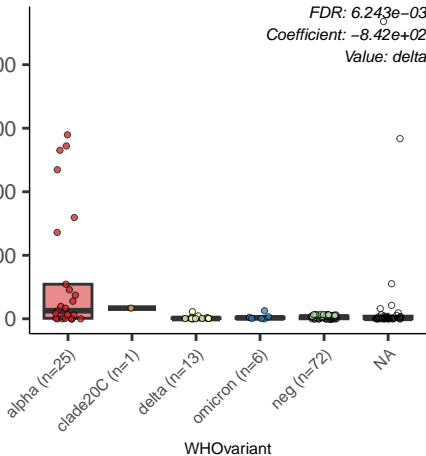

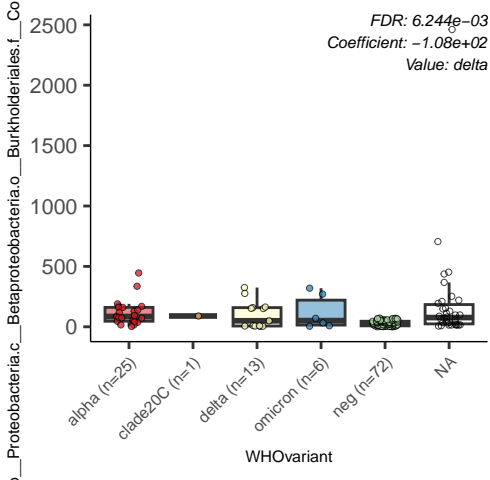

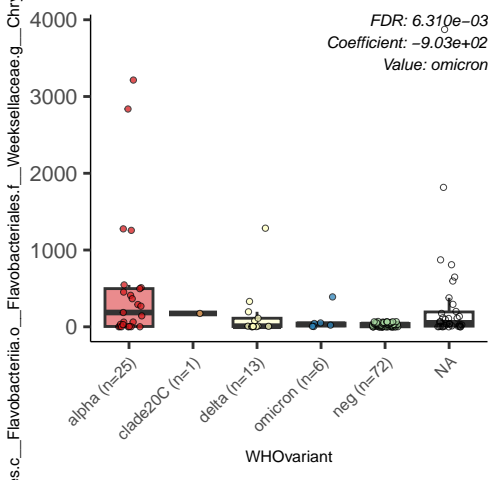

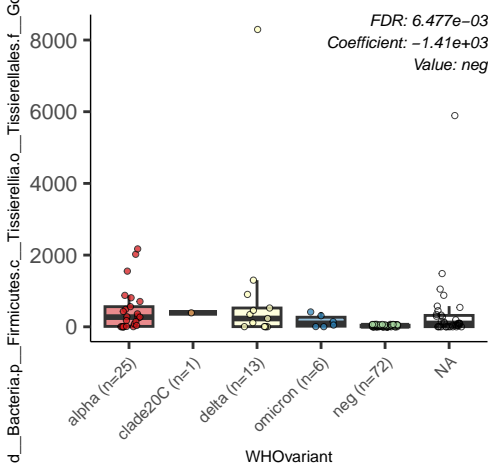

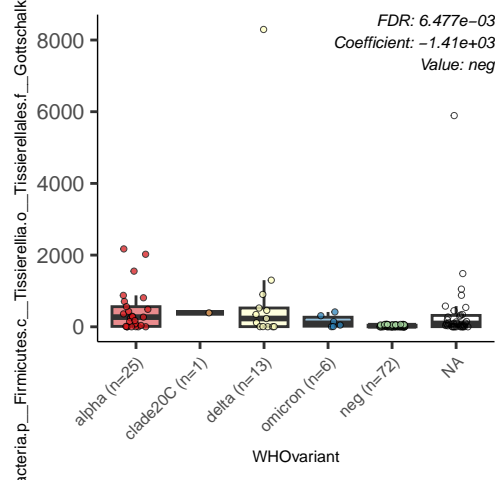

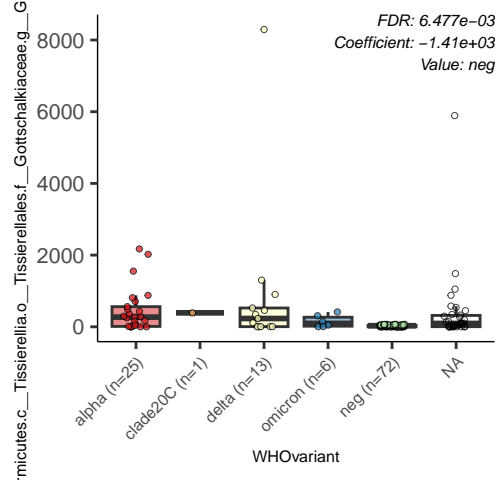

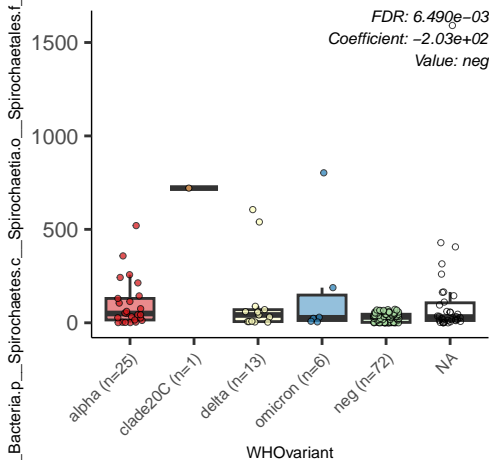

Actinobacteria.c\_Actinomycetia.o\_Propionibacteriales.f\_Propio

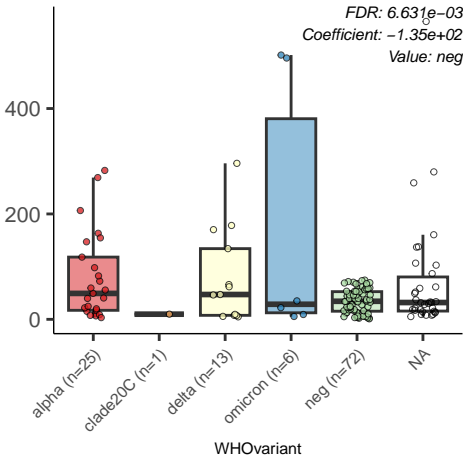



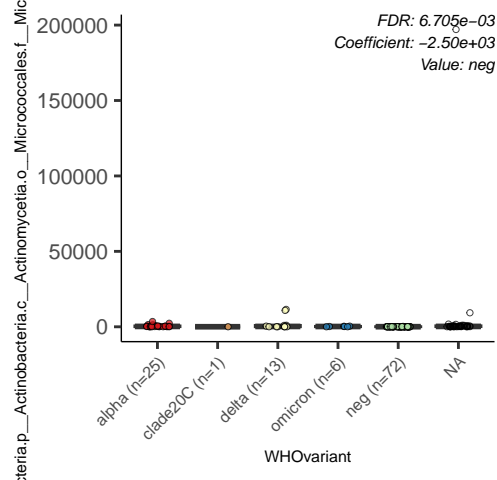

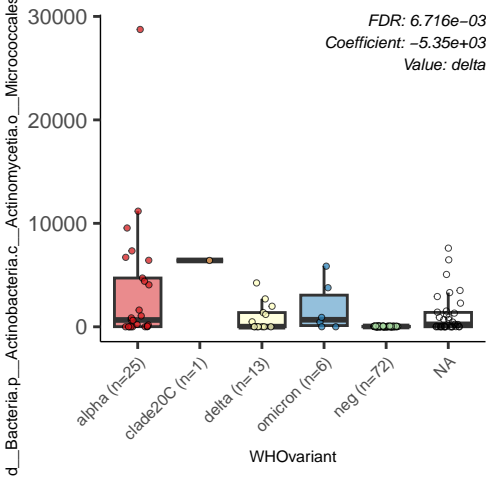

FDR:  $6.716e-03$   
Coefficient:  $-5.35e+03$   
Value: delta

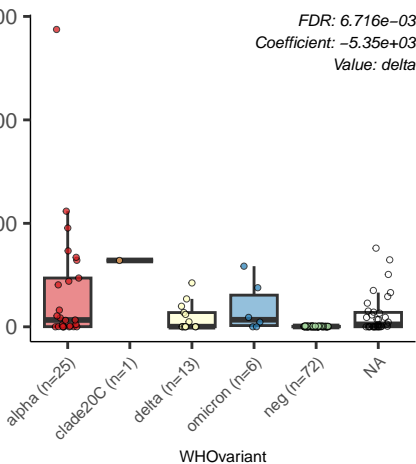

ctinobacteria.c\_\_Actinomycetia.o\_\_Micrococcales.f\_\_Jonesiaceae.g

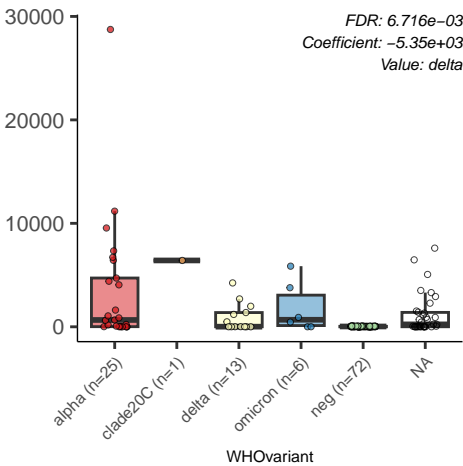

ia.p\_\_Proteobacteria.c\_\_Oligoflexia.o\_\_Bdellovibrionales.f\_\_Bdellov

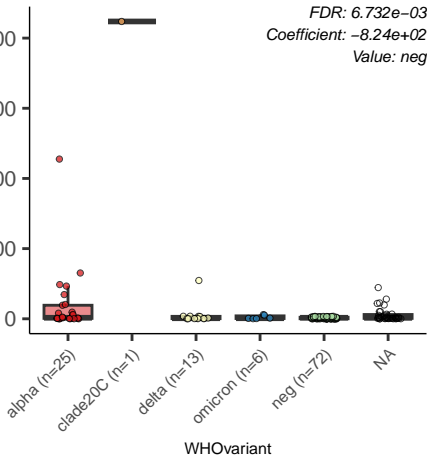

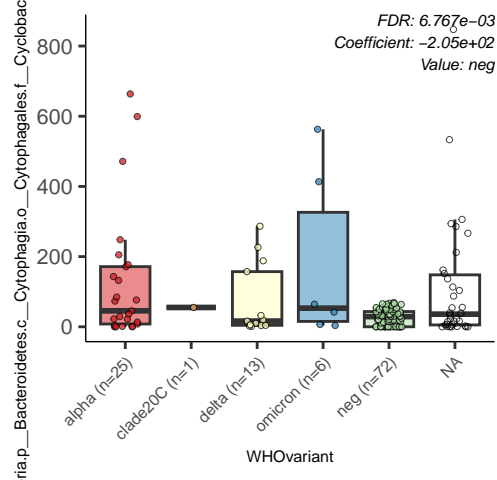

d\_Bacteria.p\_Fusobacteria

FDR:  $6.813e-03$   
Coefficient:  $-4.99e+05$   
Value: omicron

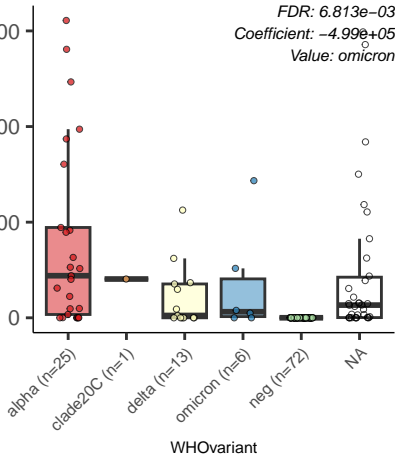

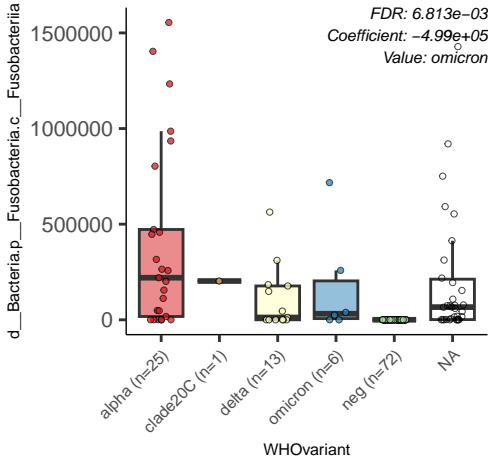



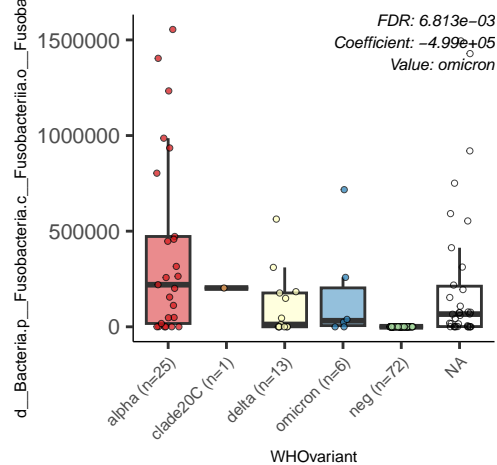

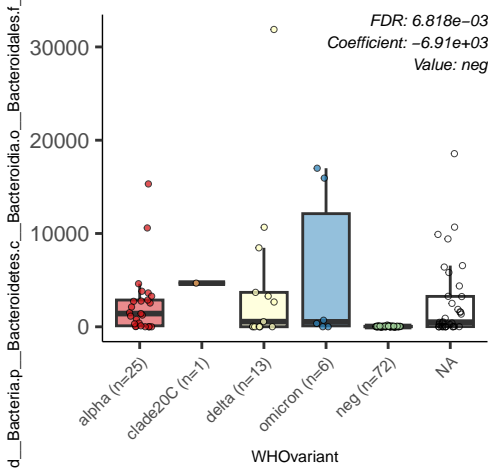

Bacteria.p\_\_Bacteroidetes.c\_\_Bacteroidia.o\_\_Bacteroidales.f\_\_Rikenellaceae

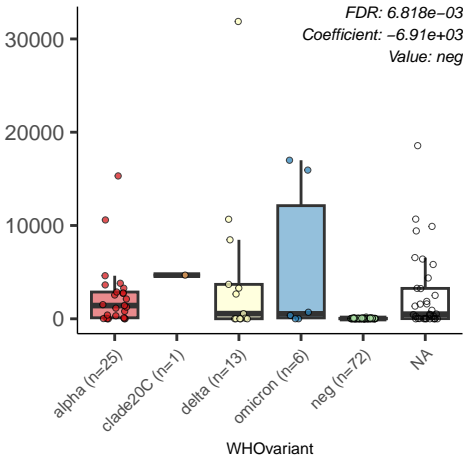

Proteobacteria.c\_\_Alphaproteobacteria.o\_\_Rhodospirillales.f\_\_Rhodospirillales

FDR:  $6.837e-03$   
Coefficient:  $-6.10e+02$   
Value: neg

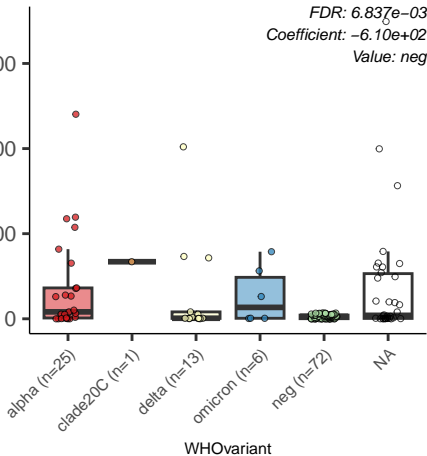

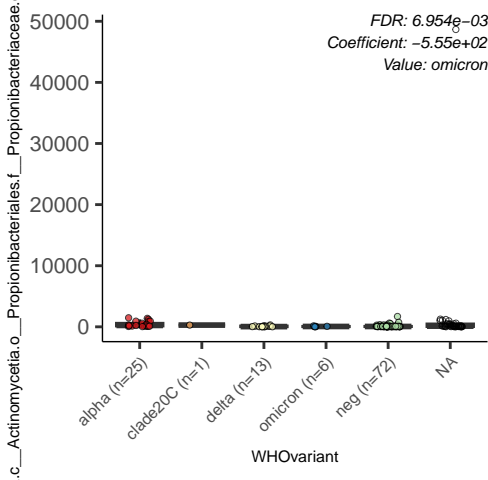

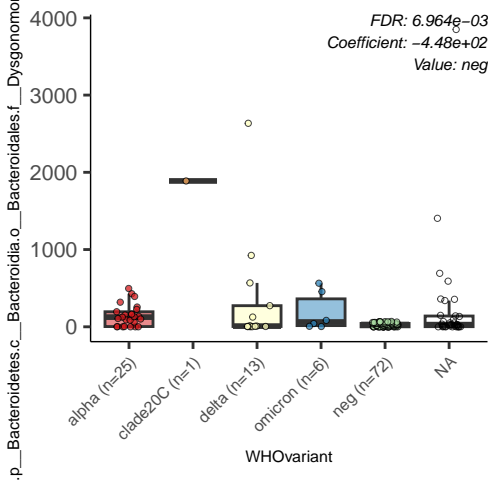

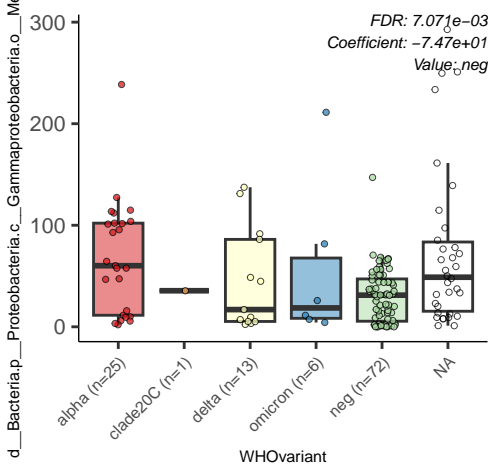

eria.p\_\_Proteobacteria.c\_\_Gammaproteobacteria.o\_\_Methylococ

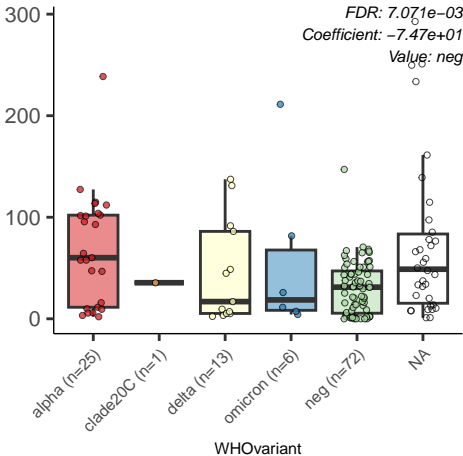



bacteria.c\_\_Actinomycetia.o\_\_Corynebacteriales.f\_\_Nocardiaceae.g

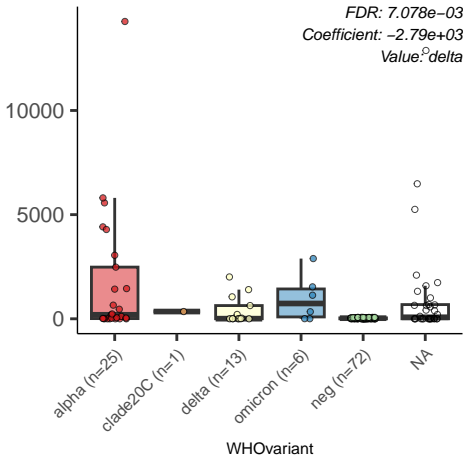

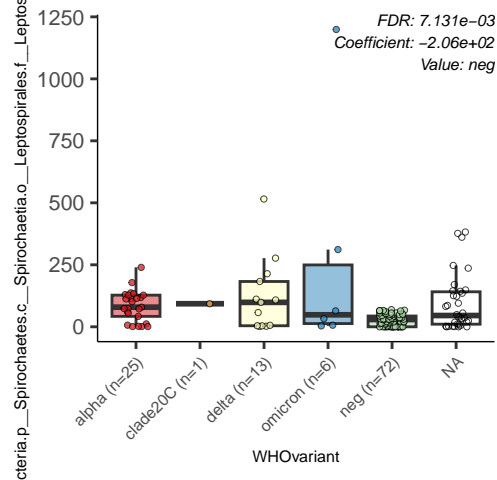

eria.p\_Bacteroidetes.c\_Bacteroidia.o\_Bacteroidales.f\_Prevote

FDR:  $7.166e-03$   
Coefficient:  $-1.35e+04$   
Value: delta

$1e+05$

$5e+04$

$0e+00$

alpha (n=25)

clade20C (n=1)

delta (n=13)

omicron (n=6)

neg (n=72)

NA

WHOvariant

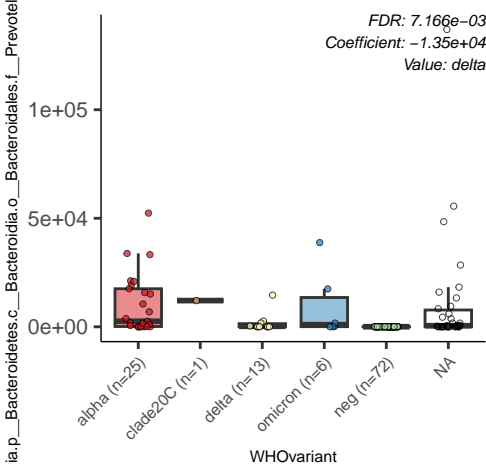

FDR:  $7.166e-03$   
Coefficient:  $-1.35e+04$   
Value: delta

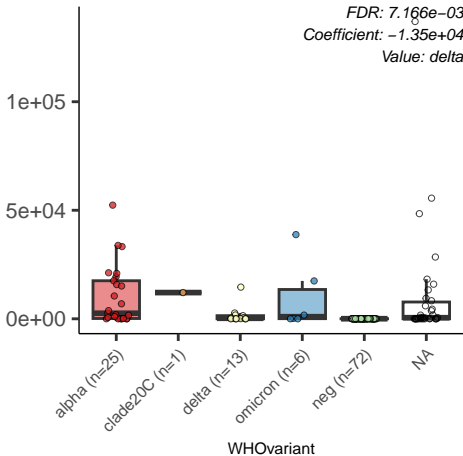

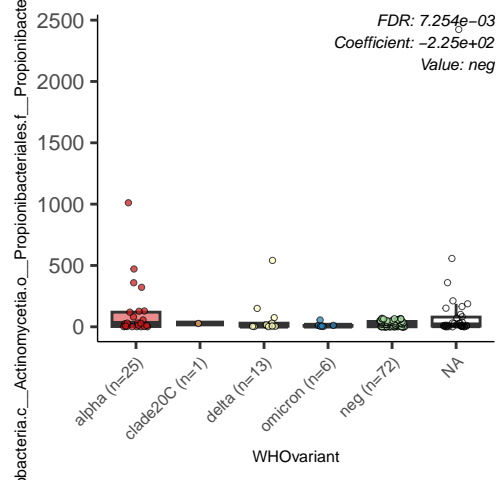

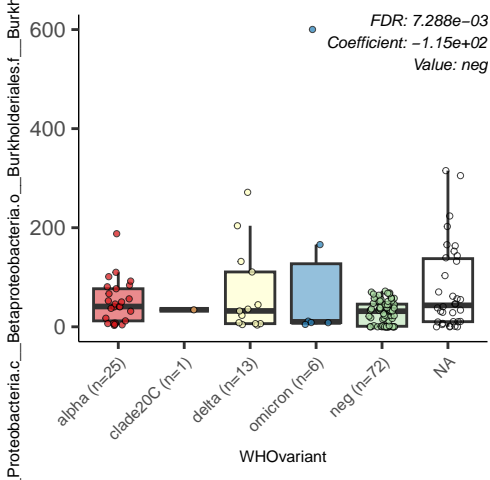

d\_Bacteria.p\_Bacteroidetes.c\_Bacteroidia.o\_Marinifilum

FDR:  $7.302e-03$   
Coefficient:  $-6.52e+02$   
Value: omicron

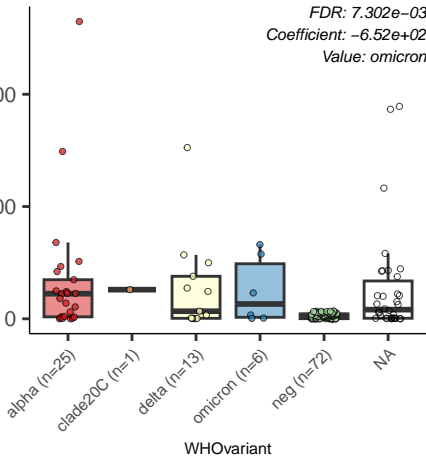

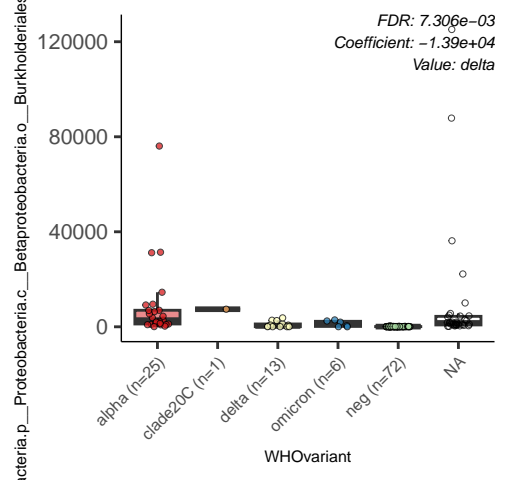



tes.c\_\_Bacilli.o\_\_Lactobacillales.f\_\_Streptococcaceae.g\_\_Streptococcus

FDR:  $7.347e-03$   
Coefficient:  $1.87e+04$   
Value: delta

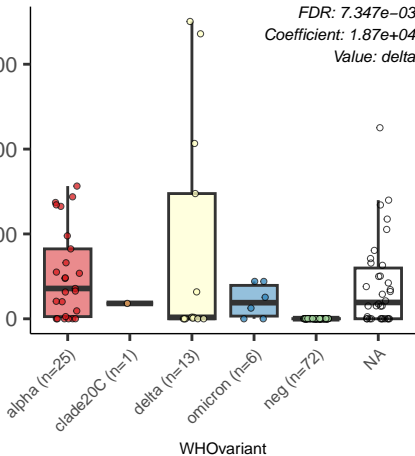

d\_Bacteria.p\_Actinobacteria.c\_Coriobacteria.o\_Egge

FDR:  $7.349e-03$   
Coefficient:  $-1.48e+03$   
Value: neg

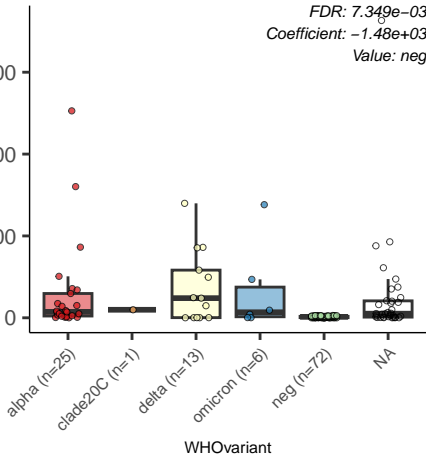

Bacteria.p\_Actinobacteria.c\_Coriobacteriia.o\_Eggerthellales.f

FDR:  $7.349e-03$   
Coefficient:  $-1.48e+03$   
Value: neg

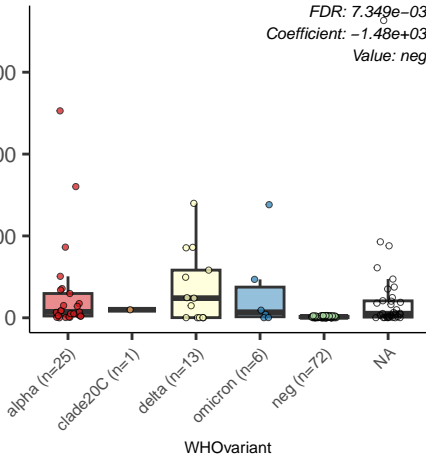

Proteobacteria.c\_\_Gammaproteobacteria.o\_\_Enterobacterales.f\_\_E

FDR: 7.391e-03  
Coefficient: 4.83e+02  
Value: delta

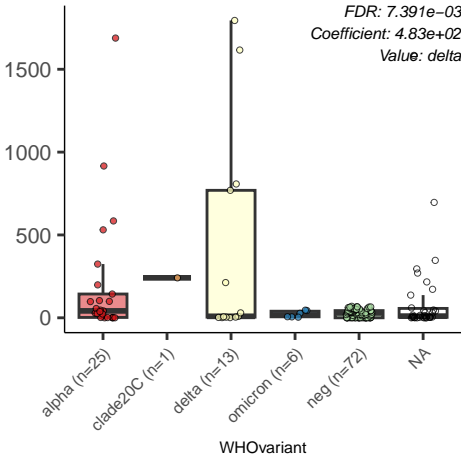

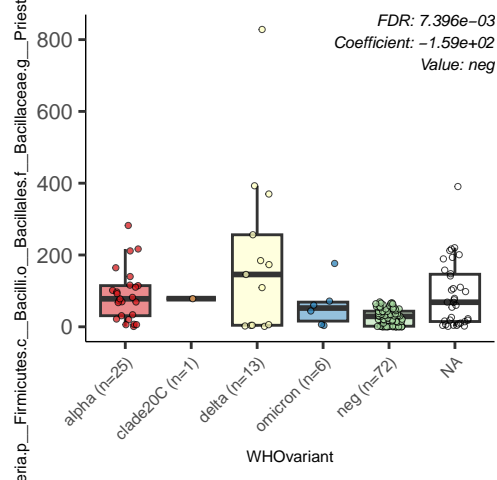

bacteria.o\_\_Synechococcales.f\_\_Synechococcaceae.g\_\_Synecho

FDR:  $7.546e-03$   
Coefficient:  $-1.51e+02$   
Value: delta

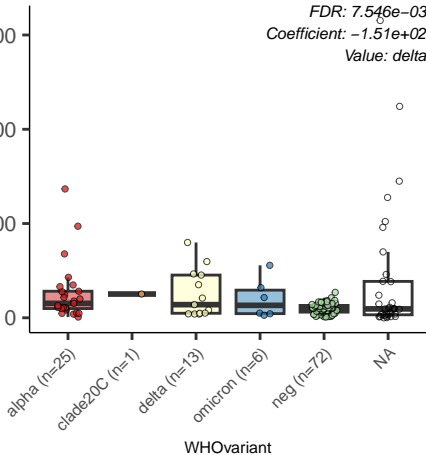

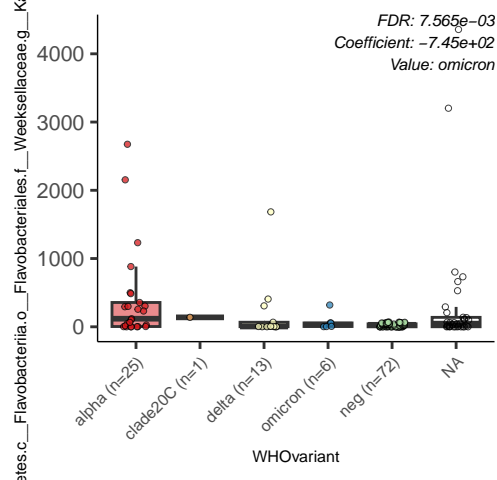

ria.p\_Actinobacteria.c\_Actinomycetia.o\_Micrococcales.f\_Derma

FDR:  $7.637e-03$   
Coefficient:  $-1.09e+03$   
Value: omicron

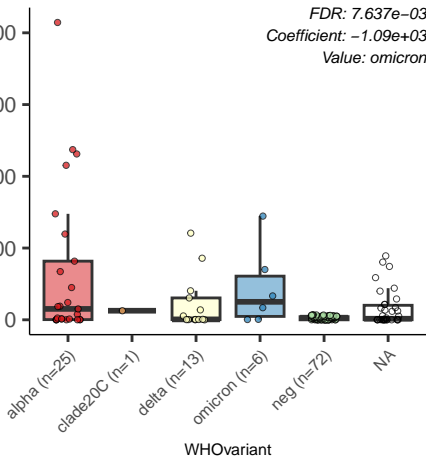



bbacteria.c\_\_Actinomycetia.o\_\_Micrococcales.f\_\_Dermatophilaceae

FDR:  $7.637e-03$   
Coefficient:  $-1.09e+03$   
Value: omicron

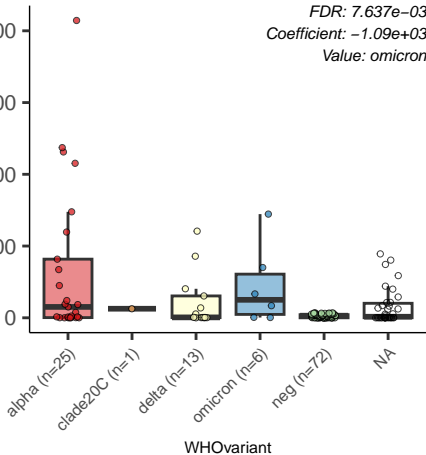

FDR:  $7.649e-03$   
Coefficient:  $-6.02e+02$   
Value: neg

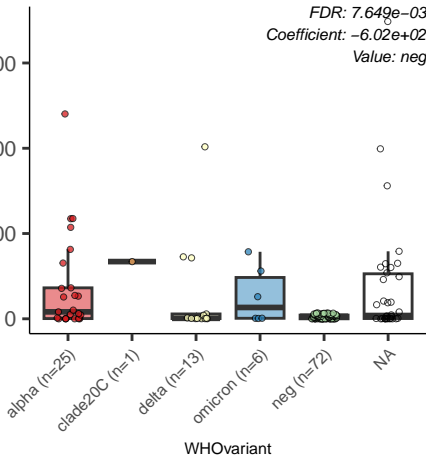

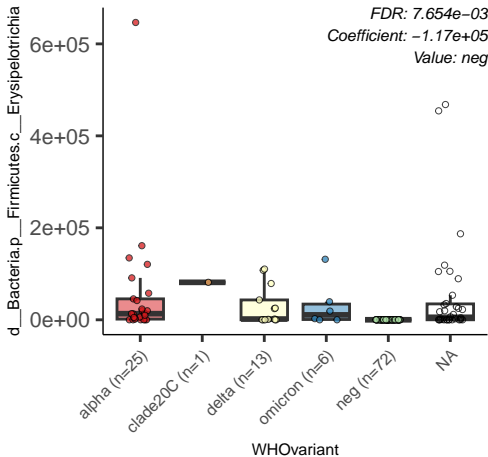

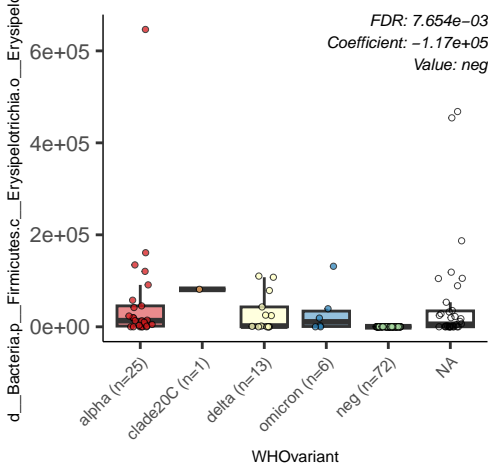

Bacteria.p\_\_Firmicutes.c\_\_Erysipelotrichia.o\_\_Erysipelotrichales.f

FDR:  $7.664e-03$   
Coefficient:  $-1.17e+05$   
Value: neg

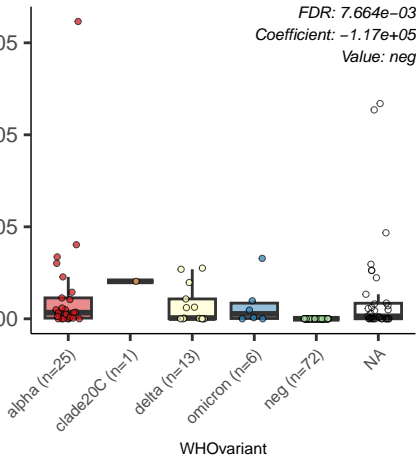

cteria.c\_\_Acidobacteriia.o\_\_Acidobacteriales.f\_\_Acidobacteriaceae.

FDR:  $7.698e-03$   
Coefficient:  $-6.63e+02$   
Value: delta

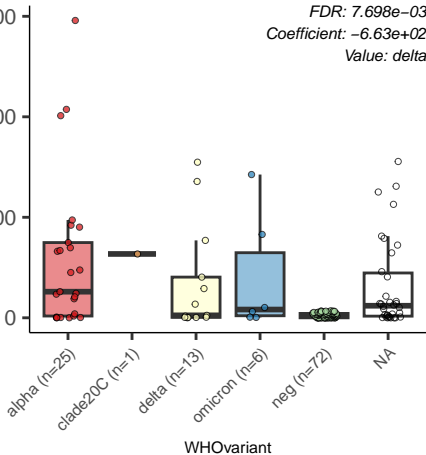

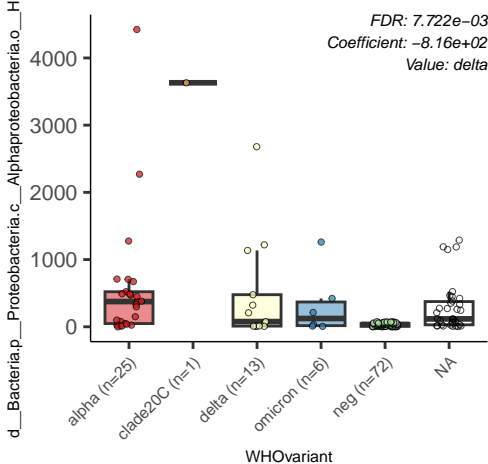

Bacteria.p\_Firmicutes.c\_Bacilli.o\_Lactobacillales.f\_Enterococce

FDR:  $7.775e-03$   
Coefficient:  $-4.63e+02$   
Value: neg

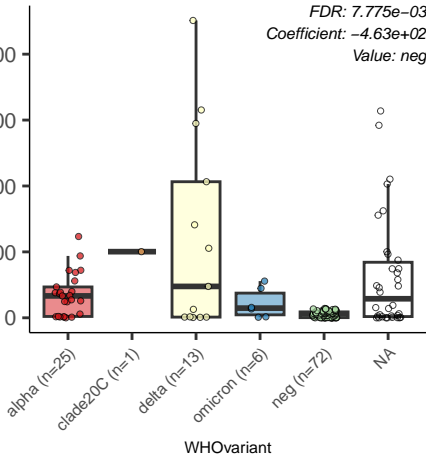



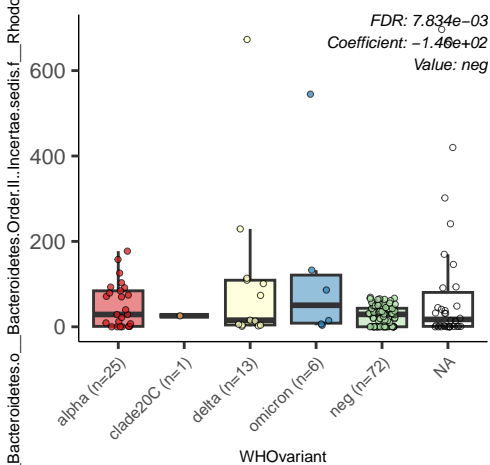

es.o\_\_Bacteroidetes.Order.II..Incertae.sedis.f\_\_Rhodothermaceae.g

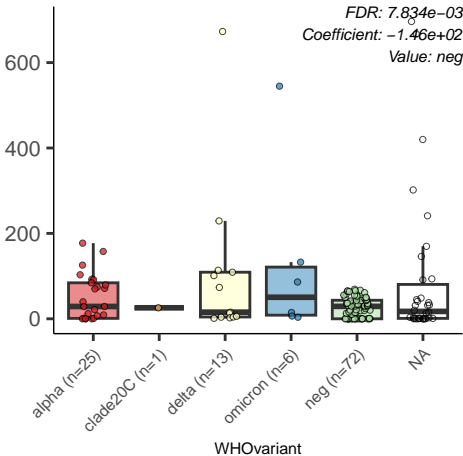

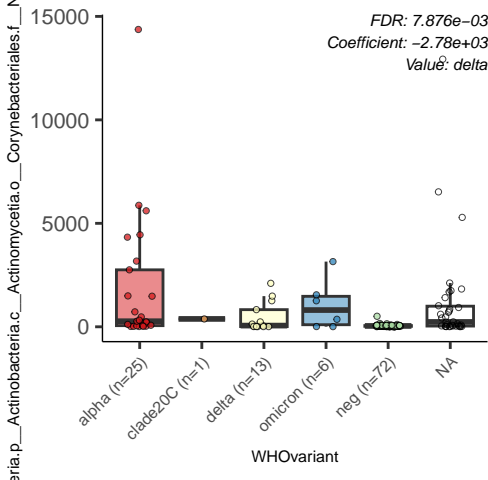

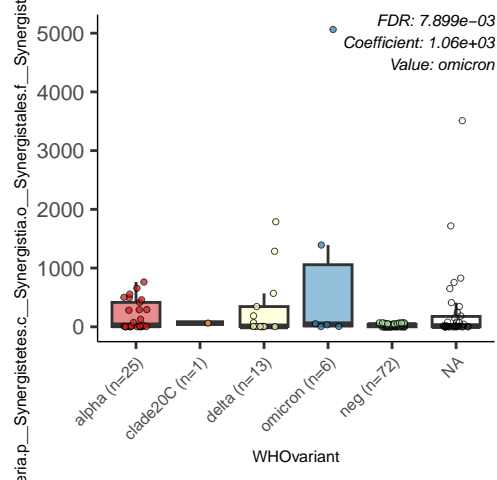

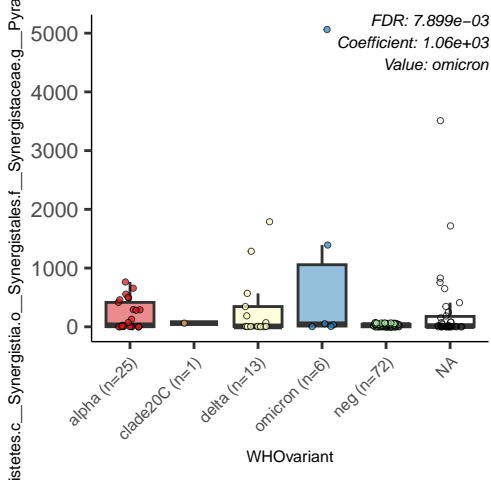

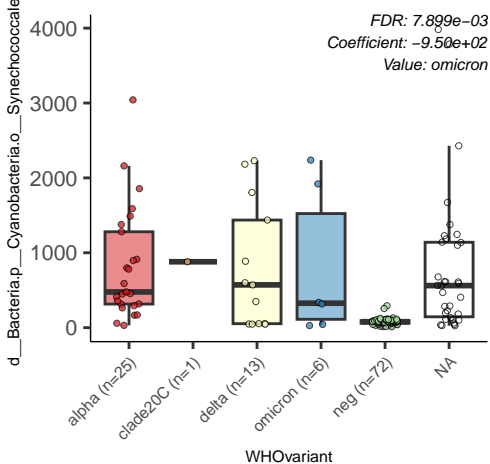

Alphaproteobacteria.o\_\_Caulobacteriales.f\_\_Caulobacteraceae.g

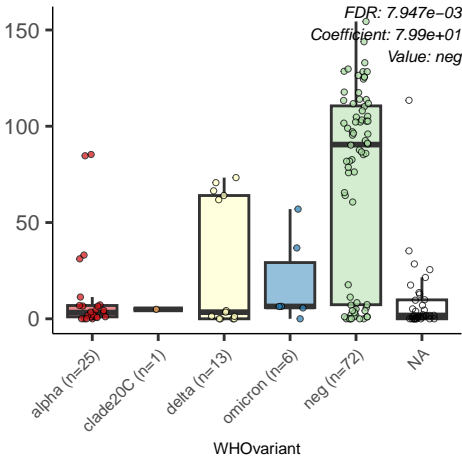

Flavobacteriia.o\_\_Flavobacteriales.f\_\_Flavobacteriaceae.g\_\_Capn

600

400

200

0

alpha (n=25)

clade20C (n=1)

delta (n=13)

omicron (n=6)

neg (n=72)

NA

WHOvariant

FDR:  $7.952e-03$

Coefficient:  $-1.76e+02$

Value: neg

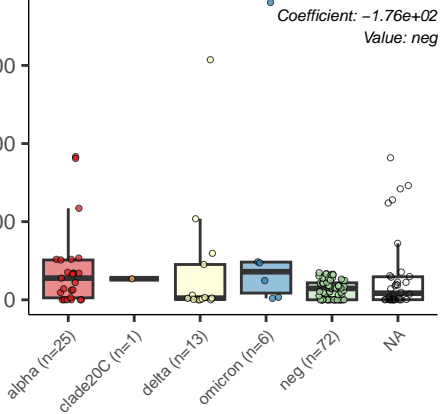



acteria.c\_Actinomycetia.o\_Actinomycetales.f\_Actinomycetaceae.g

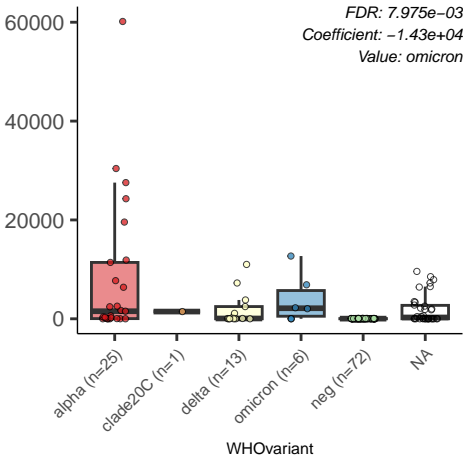

Flavobacteriia.o\_\_Flavobacteriales.f\_\_Weeksellaceae.g\_\_Elizabeth

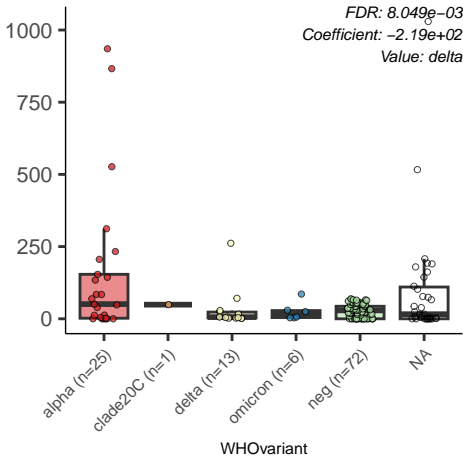

acteria.c\_\_Alphaproteobacteria.o\_\_Rhodobacterales.f\_\_Rhodobacter

*FDR: 8.144e-03*  
*Coefficient: 7.31e+01*  
*Value: neg*

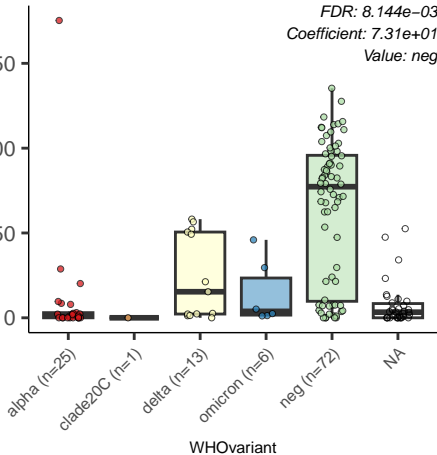

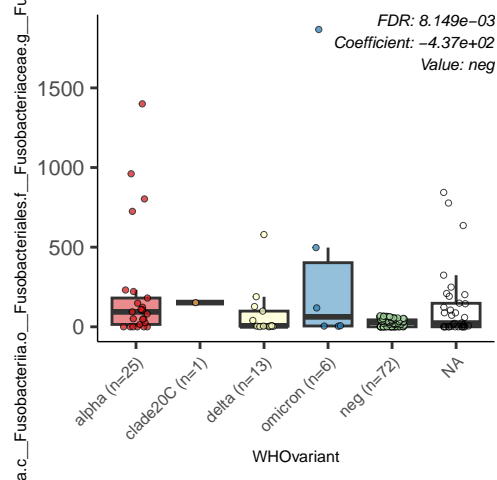

.p\_Actinobacteria.c\_Actinomycetia.o\_Actinomycetales.f\_Actino

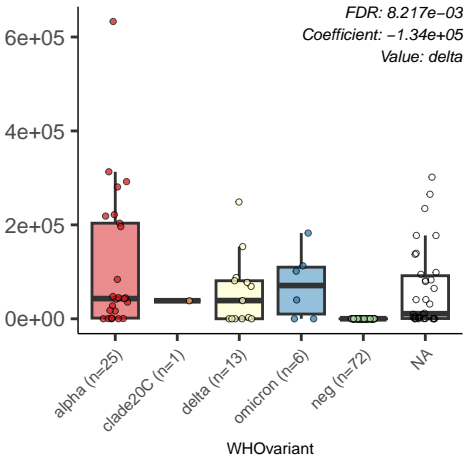

es.c\_\_Spirochaetia.o\_\_Spirochaetales.f\_\_Treponemataceae.g\_\_Tre

FDR:  $8.286e-03$   
Coefficient:  $-5.65e+02$   
Value: omicron

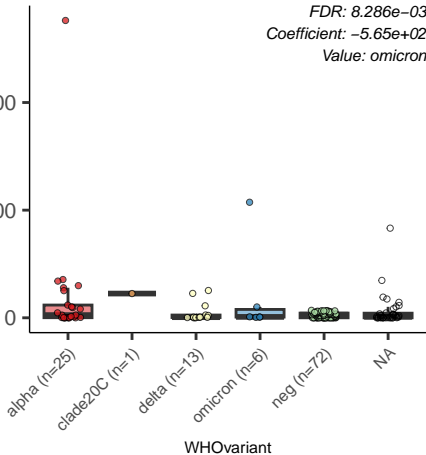

eria.p\_Firmicutes.c\_Clostridia.o\_Eubacteriales.f\_Oscillospirace

FDR:  $8.339e-03$   
Coefficient:  $-4.24e+02$   
Value: neg

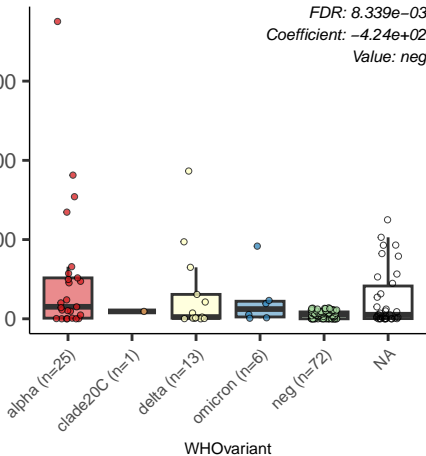

d\_Bacteria.p\_\_Firmicutes.c\_\_Clostridia.o\_\_Eubacteriales.f\_\_Chr

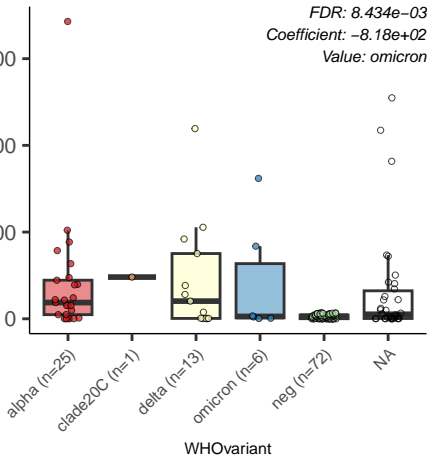



eria.p\_\_Firmicutes.c\_\_Clostridia.o\_\_Eubacteriales.f\_\_Christensenell

FDR:  $8.434e-03$   
Coefficient:  $-8.18e+02$   
Value: omicron

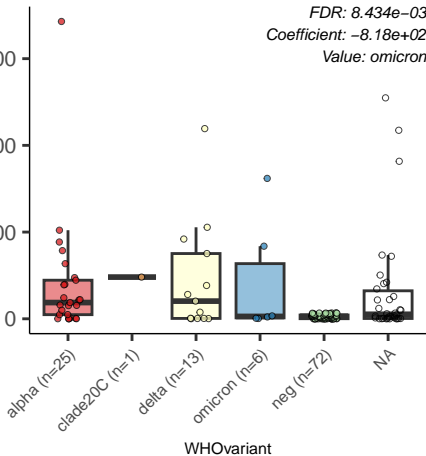

Bacteria.p\_\_Proteobacteria.c\_\_Alphaproteobacteria.o\_\_Rickettsia

FDR:  $8.452e-03$   
Coefficient:  $-1.61e+02$   
Value: delta

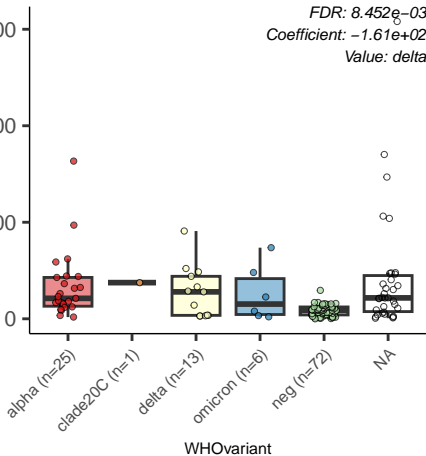

Bacteria.p\_\_Proteobacteria.c\_\_Alphaproteobacteria.o\_\_Rickettsiales

FDR:  $8.469e-03$   
Coefficient:  $-2.63e+02$   
Value: delta

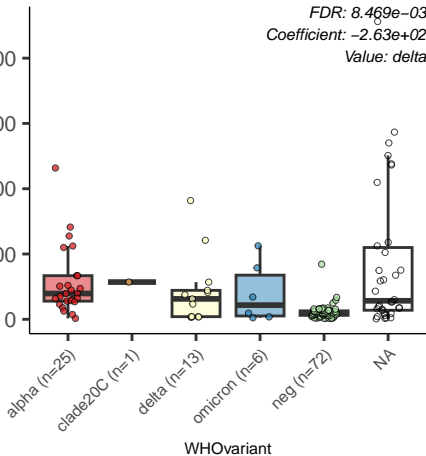

unicutes.c\_\_Negativicutes.o\_\_Veillonellales.f\_\_Veillonellaceae.g\_\_Me

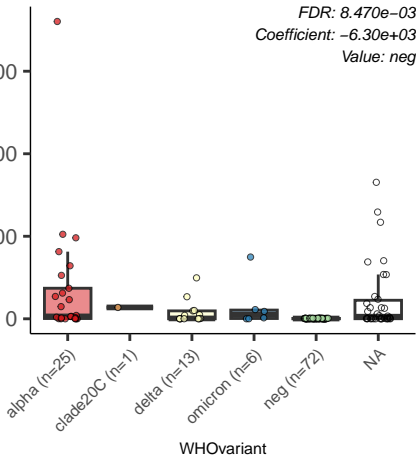

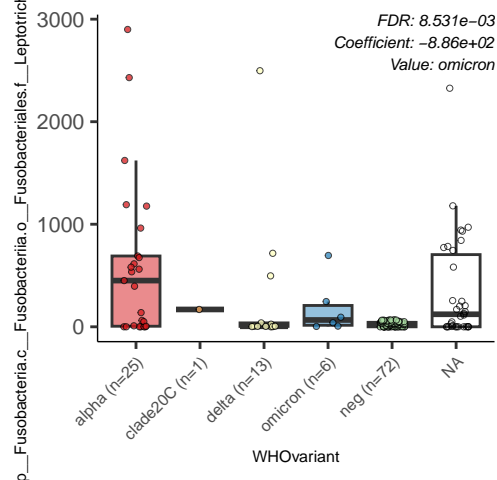

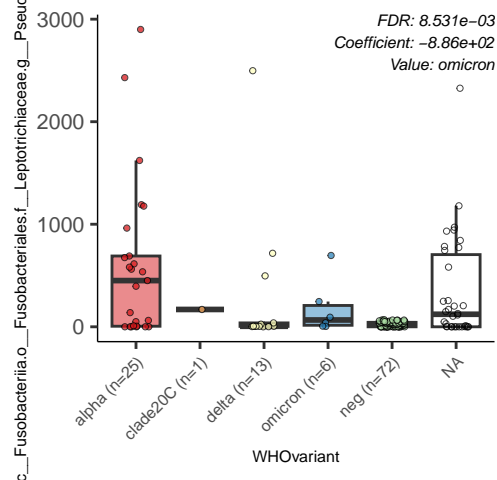

Bacteria.p\_\_Proteobacteria.c\_\_Alphaproteobacteria.o\_\_Holosporal

FDR:  $8.610e-03$   
Coefficient:  $-8.06e+02$   
Value: delta

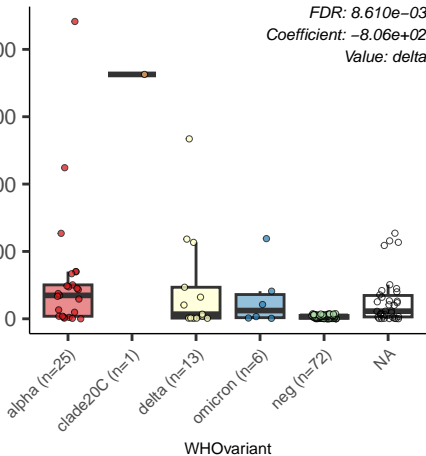

Proteobacteria.c\_\_Betaproteobacteria.o\_\_Burkholderiales.f\_\_Com

FDR:  $8.701e-03$   
Coefficient:  $3.40e+03$   
Value: clade20C

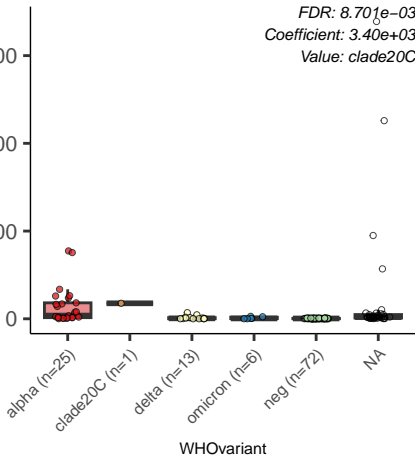



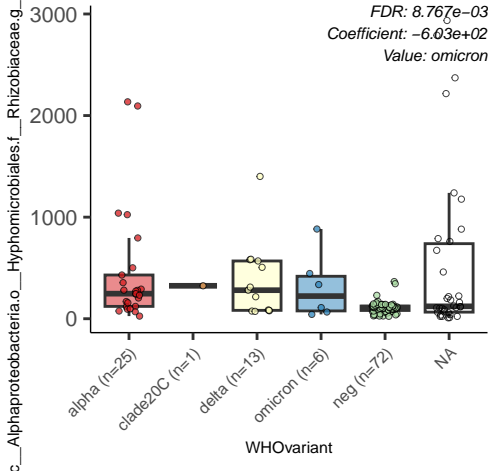

d\_\_Bacteria.p\_\_Cyanobacteria.o\_\_Synechococcales.f\_\_Acaryo

FDR:  $8.850e-03$   
Coefficient:  $-5.83e+02$   
Value: neg

2000

1000

0

alpha (n=25)

clade20C (n=1)

delta (n=13)

omicron (n=6)

neg (n=72)

NA

WHOvariant

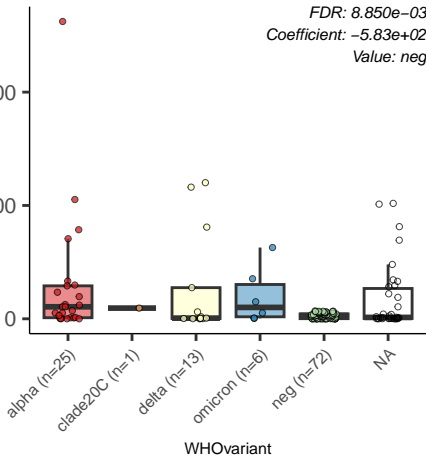

bacteria.p\_\_Cyanobacteria.o\_\_Synechococcales.f\_\_Acaryochloridac

FDR:  $8.850e-03$   
Coefficient:  $-5.83e+02$   
Value: neg

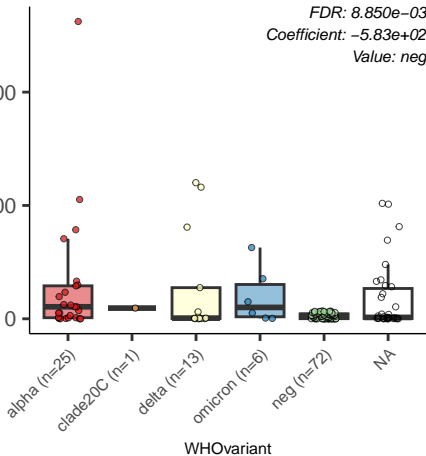

utes.c\_\_Clostridia.o\_\_Eubacteriales.f\_\_Christensenellaceae.g\_\_Ch

*FDR: 8.850e-03*  
*Coefficient: -5.92e+02*  
*Value: delta*

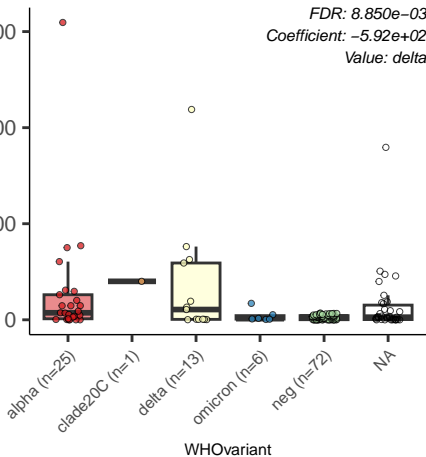

d\_Bacteria.p\_\_Candidatus.Omnitrophica

FDR: 8.853e-03

Coefficient: -9.76e+02

Value: omicron

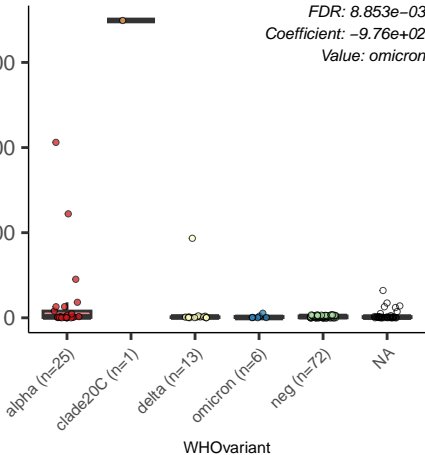

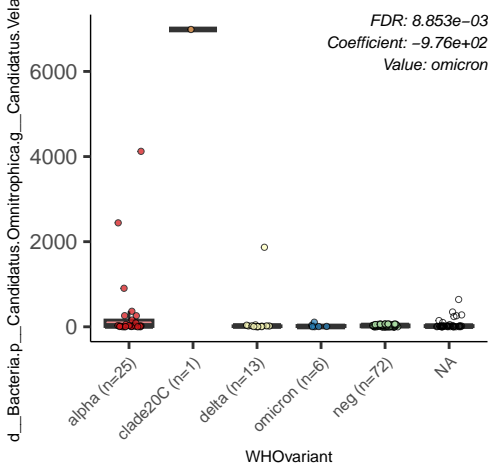

NA

Value: omicron

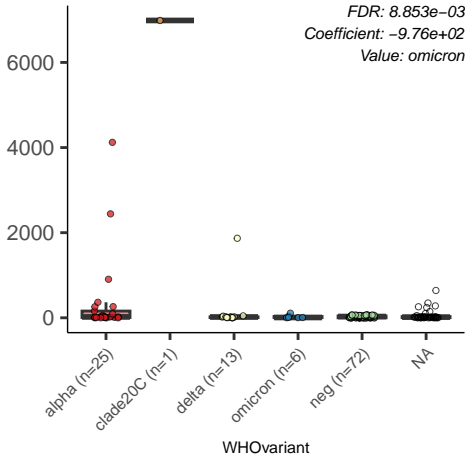

ria.c\_\_Epsilonproteobacteria.o\_\_Campylobacteriales.f\_\_Helicobacte

*FDR: 8.866e-03*  
*Coefficient: -2.86e+02*  
*Value: neg*

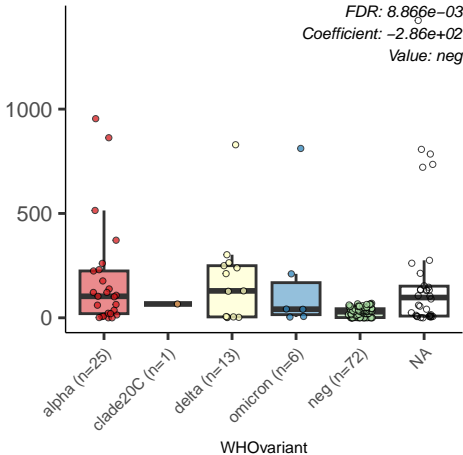



ia.c\_Actinomycetia.o\_Bifidobacteriales.f\_Bifidobacteriaceae.g

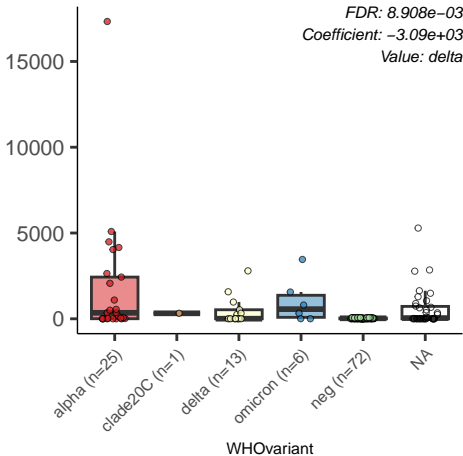

a.c\_\_Gammaproteobacteria.o\_\_Enterobacterales.f\_\_Enterobacteri

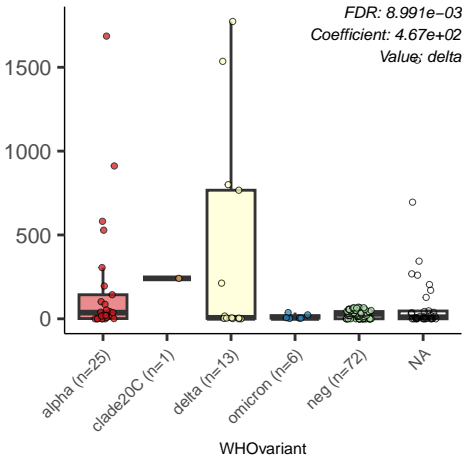

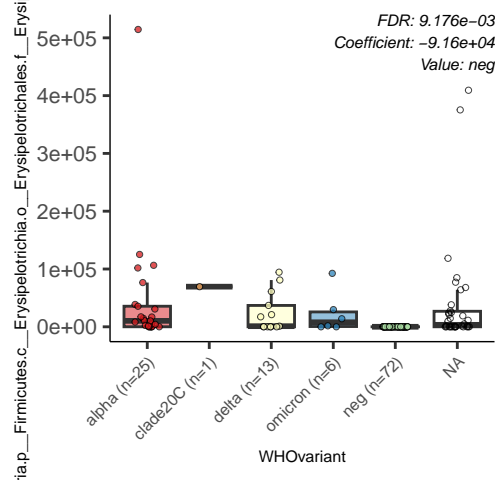

utes.c\_\_Erysipelotrichia.o\_\_Erysipelotrichales.f\_\_Erysipelotrichace

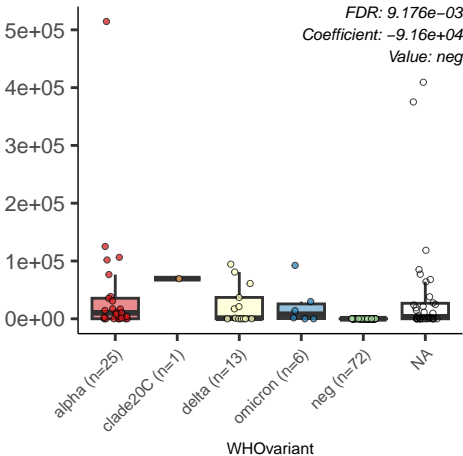

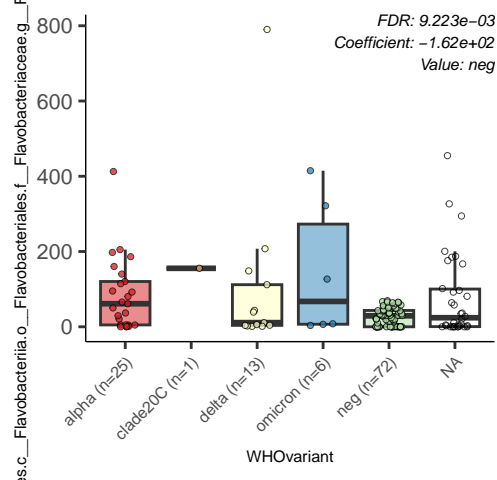

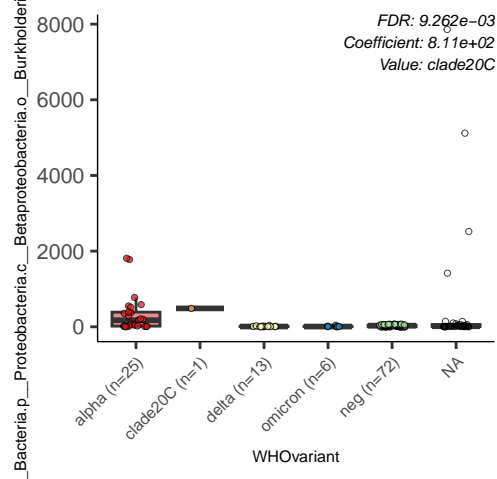

o\_Firmicutes.c\_\_Erysipelotrichia.o\_\_Erysipelotrichales.f\_\_Erysipel

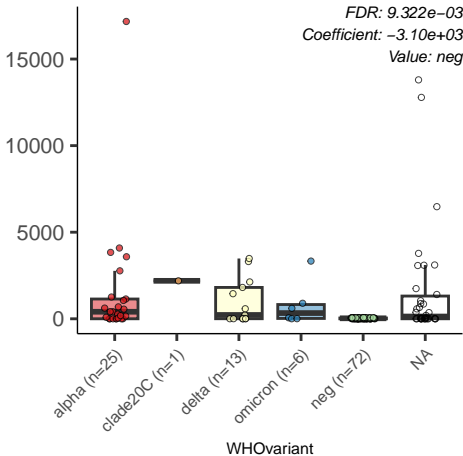

FDR:  $9.322e-03$   
Coefficient:  $-3.10e+03$   
Value: neg

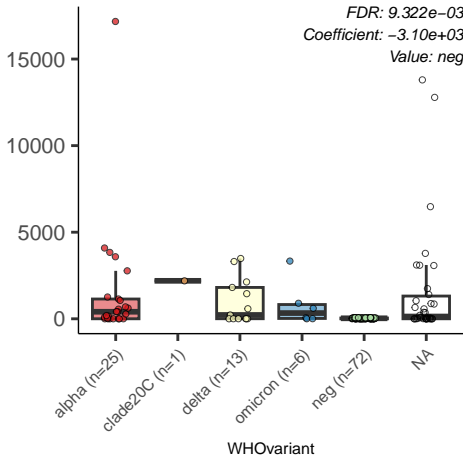



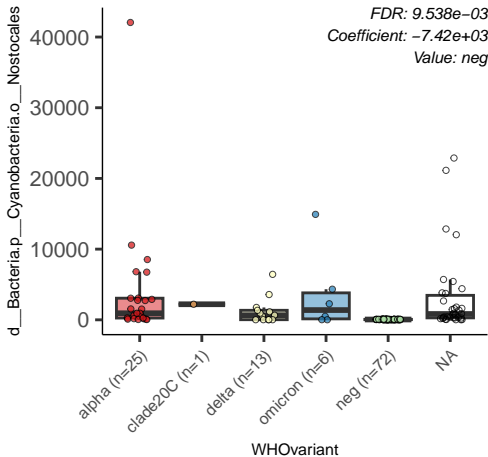

Firmicutes.c\_\_Bacilli.o\_\_Lactobacillales.f\_\_Lactobacillaceae.g\_\_Lac

FDR:  $9.638e-03$   
Coefficient:  $-2.93e+02$   
Value: neg

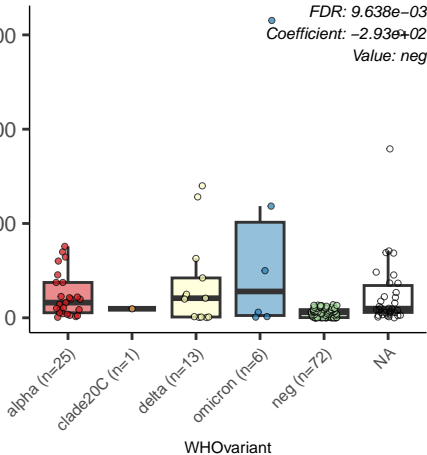

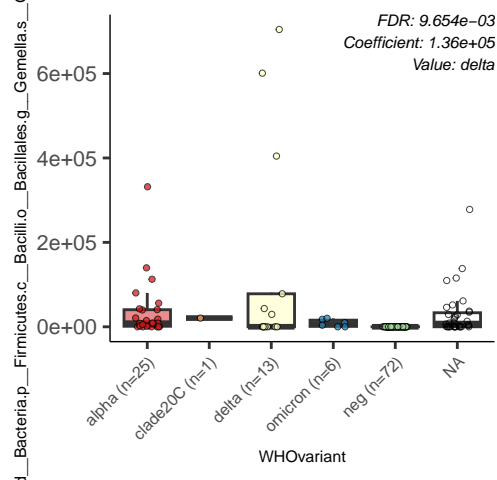

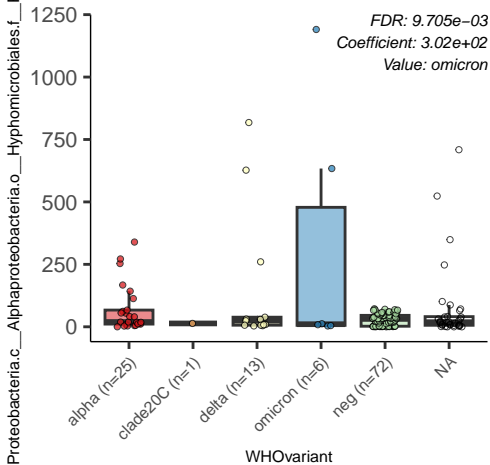

ctinobacteria.c\_\_Actinomycetia.o\_\_Pseudonocardiales.f\_\_Pseudonocardia.g\_\_Pseudonocardia.s\_\_Pseudonocardia

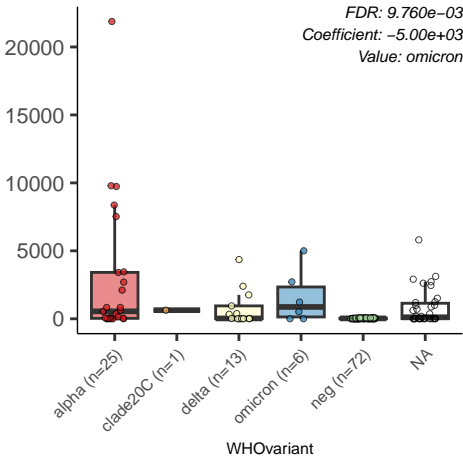

acteria.c\_\_Betaproteobacteria.o\_\_Burkholderiales.f\_\_Burkholderiaceae

FDR:  $9.763e-03$   
Coefficient:  $-7.76e+01$   
Value: neg

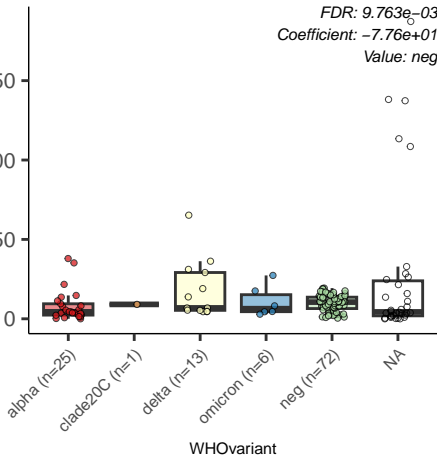

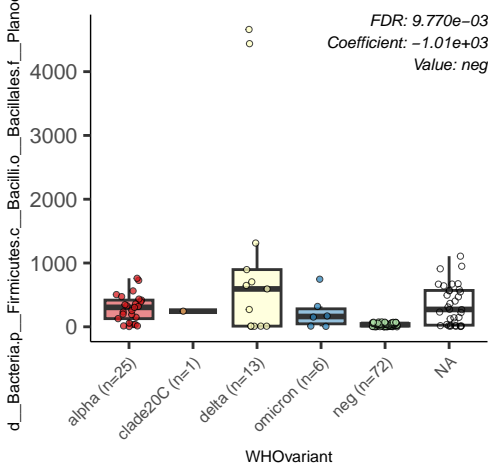

p\_Actinobacteria.c\_Actinomycetia.o\_Micrococcales.f\_Microb

FDR:  $9.831e-03$   
Coefficient:  $-5.73e+03$   
Value: delta

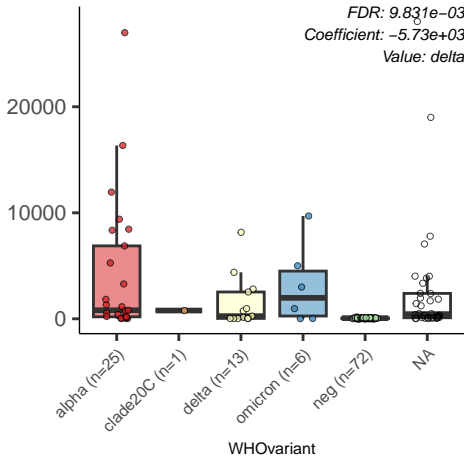



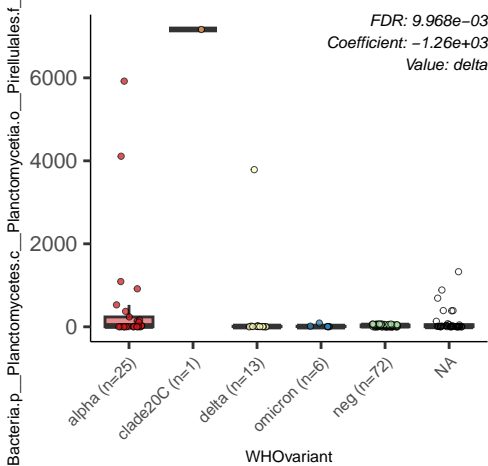

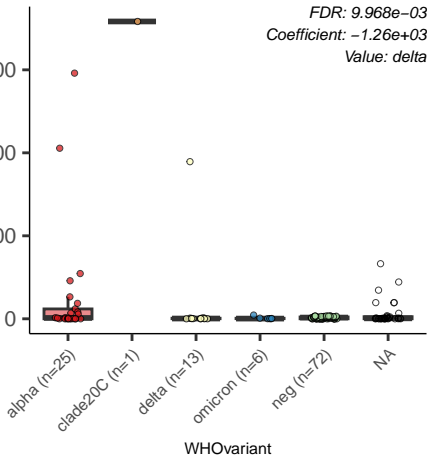

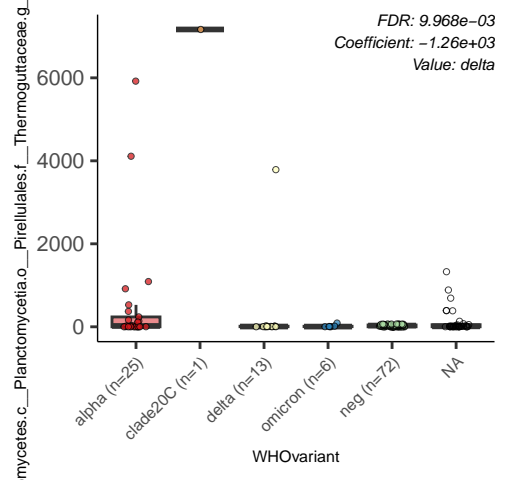

Bacteria.p\_\_Proteobacteria.c\_\_Betaproteobacteria.o\_\_Burkholderia

FDR:  $9.989 \times 10^{-3}$   
Coefficient:  $1.02 \times 10^3$   
Value: clade20C

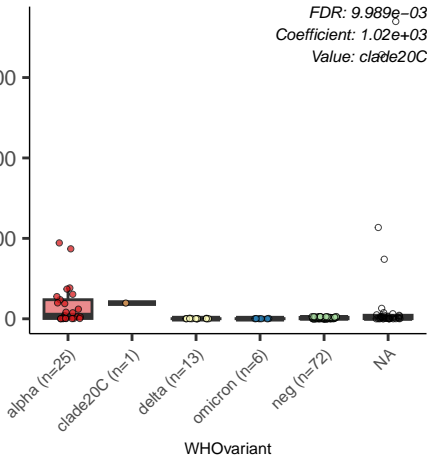

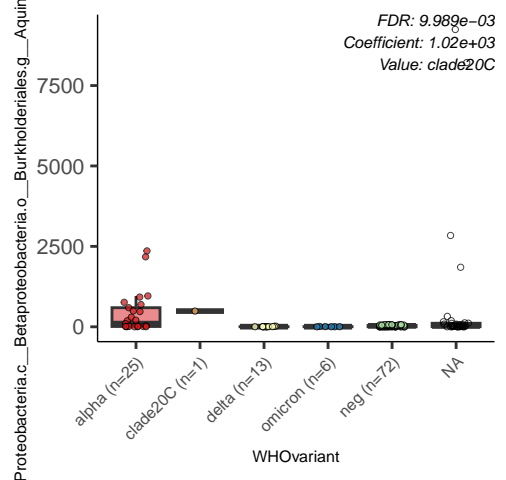

idetes.c\_Flavobacteriia.o\_Flavobacteriales.f\_Flavobacteriaceae

FDR:  $1.002e-02$   
Coefficient:  $-2.03e+02$   
Value: neg

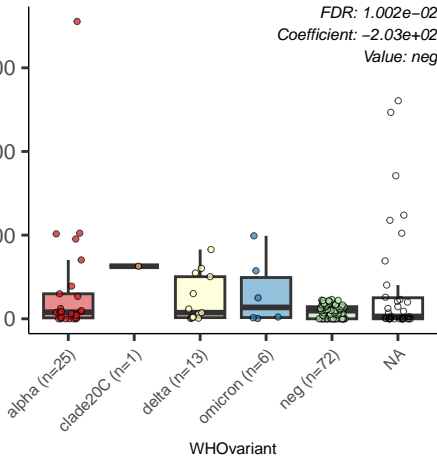

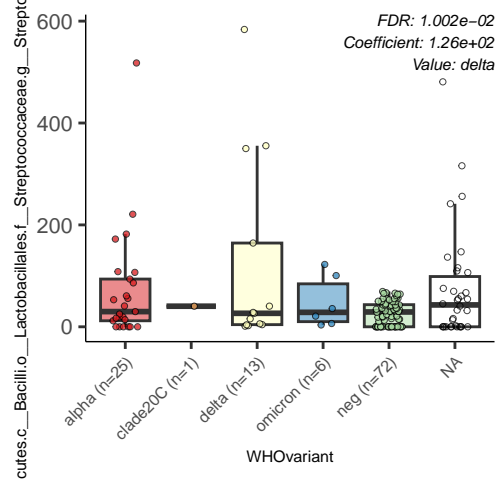

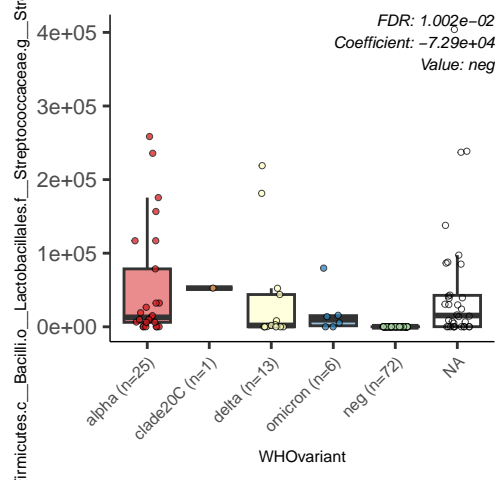



d\_\_Bacteria.p\_\_Tenericutes.c\_\_Mollicutes.o\_\_Acholeplas

FDR:  $1.007e-02$   
Coefficient:  $-4.58e+02$   
Value: delta

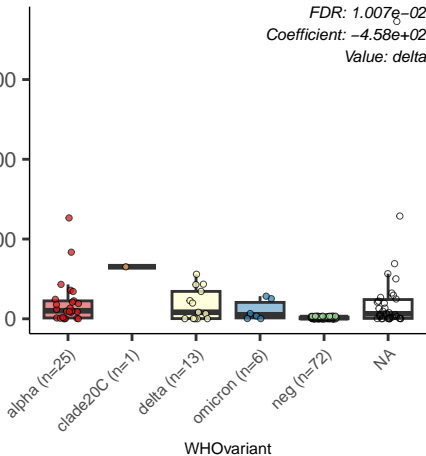

Bacteria.p\_Tenericutes.c\_Mollicutes.o\_Acholeplasmatales.f\_A

FDR:  $1.007e-02$   
Coefficient:  $-4.58e+02$   
Value: delta

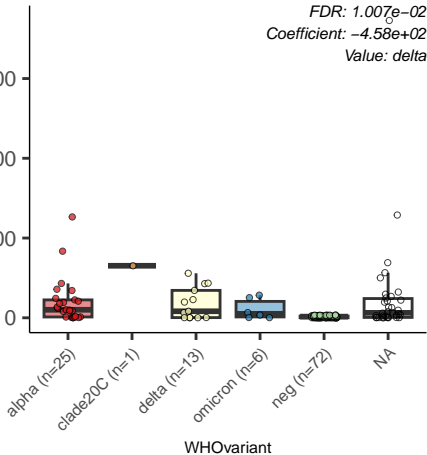

Bacteria.p\_Firmicutes.c\_Clostridia.o\_Eubacteriales.f\_Lachnosp

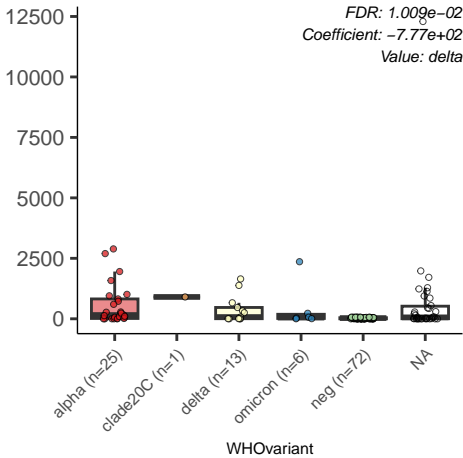

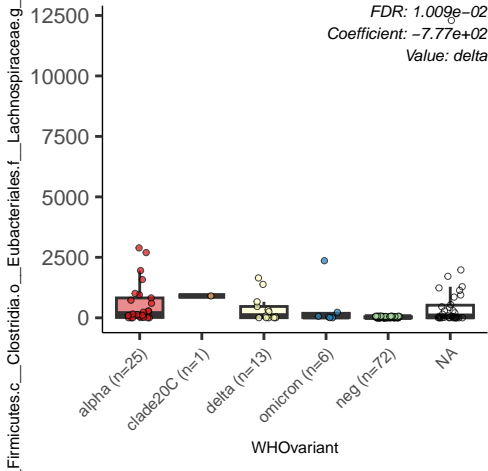

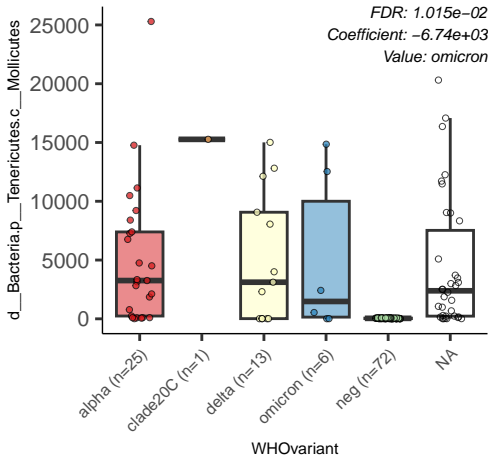

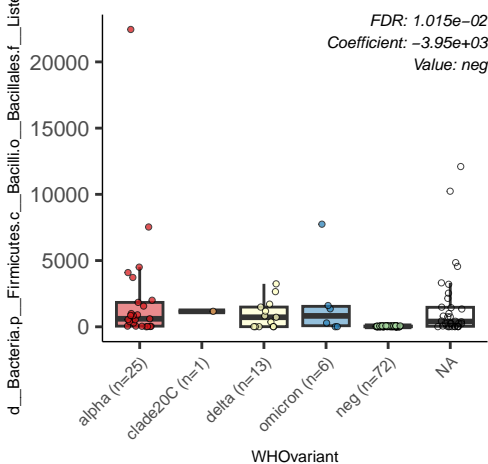

s.c\_Flavobacteriia.o\_Flavobacteriales.f\_Weeksellaceae.g\_\_Chr

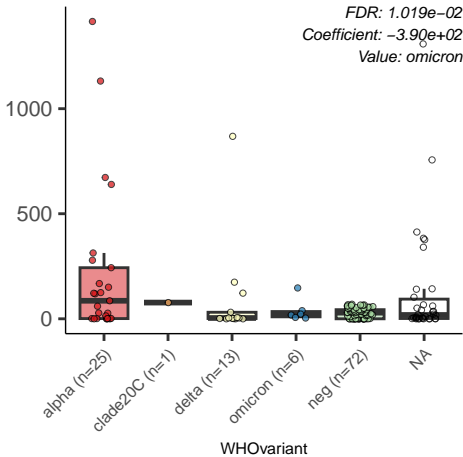

Bacteria.p\_\_Proteobacteria.c\_\_Betaproteobacteria.o\_\_Burkholderia

FDR:  $1.019 \times 10^{-2}$   
Coefficient:  $1.82 \times 10^3$   
Value: clade20C

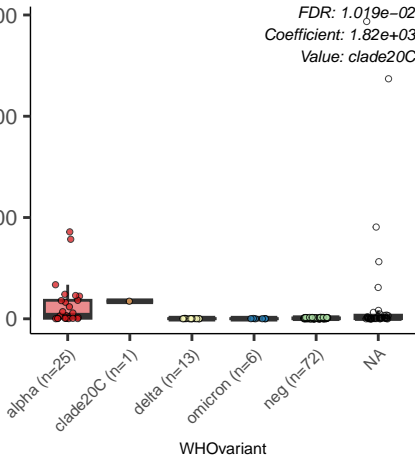



detes.c\_\_Bacteroidia.o\_\_Bacteroidales.f\_\_Tannerellaceae.g\_\_Parat

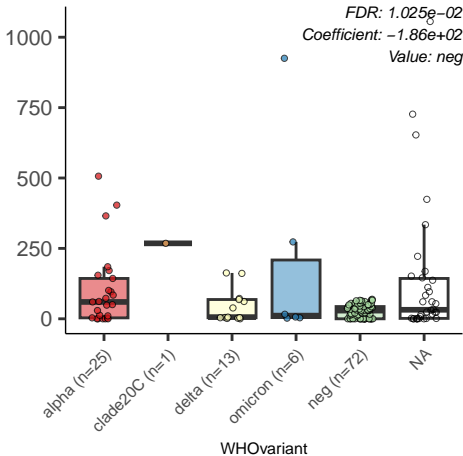

irmicutes.c\_\_Negativicutes.o\_\_Acidaminococcales.f\_\_Acidaminococo

FDR: 1.028e-02  
Coefficient: -6.20e+02  
Value: neg

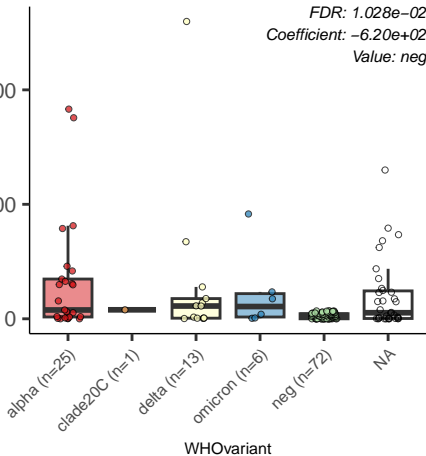

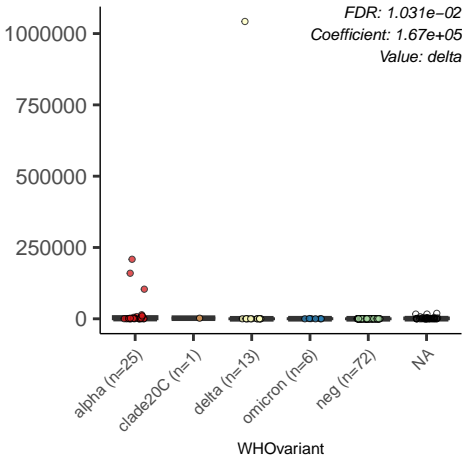

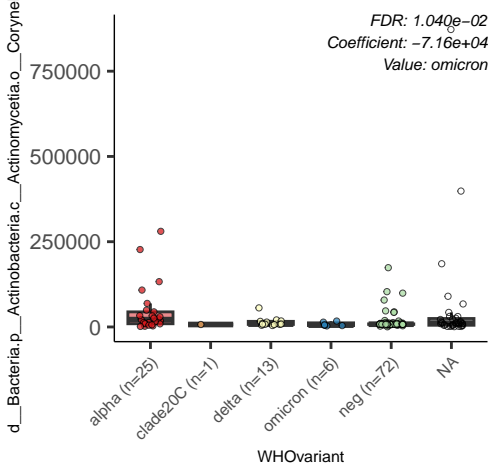

\_\_Bacteria.p\_\_Proteobacteria.c\_\_Betaproteobacteria.o\_\_Burkholder

FDR:  $1.043e-02$   
Coefficient:  $7.09e+02$   
Value: clade20C

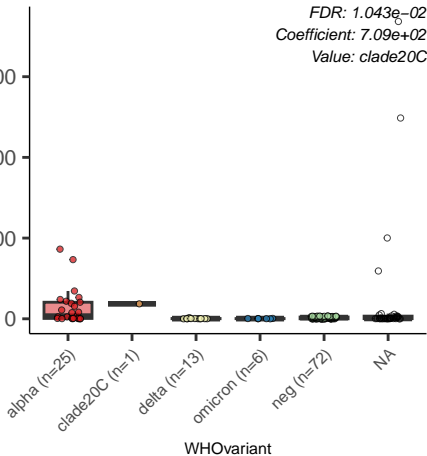

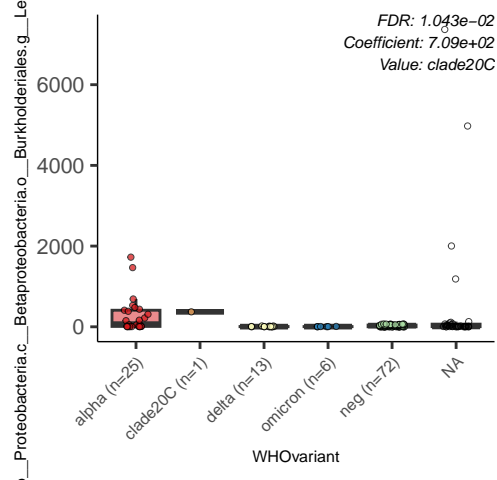

d\_Bacteria.p\_\_Proteobacteria.c\_\_Gammaproteobacteria.o\_\_

FDR:  $1.043e-02$   
Coefficient:  $-1.54e+02$   
Value: neg

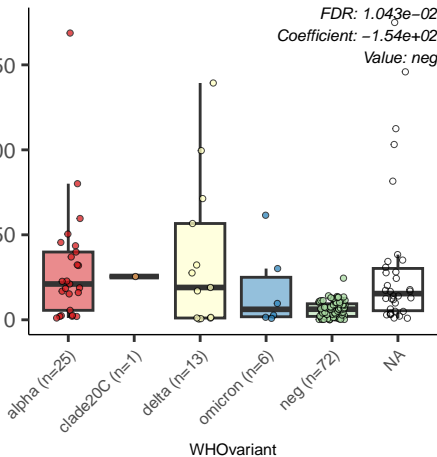

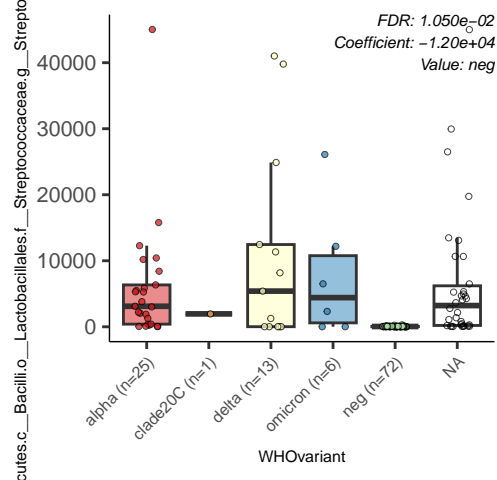



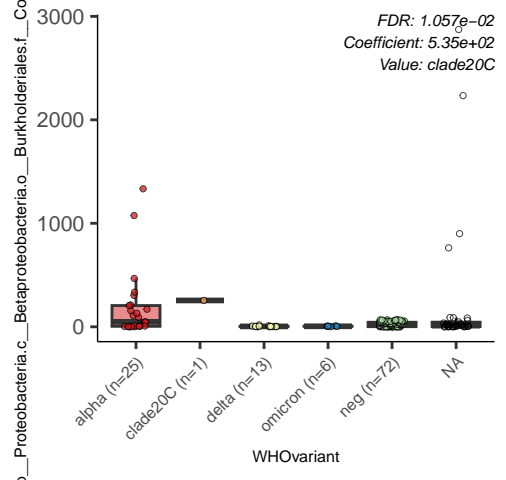

d\_Bacteria.p\_Actinobacteria.c\_Actinomycetia.o\_Coryne

FDR:  $1.071e-02$   
Coefficient:  $-6.05e+04$   
Value: neg

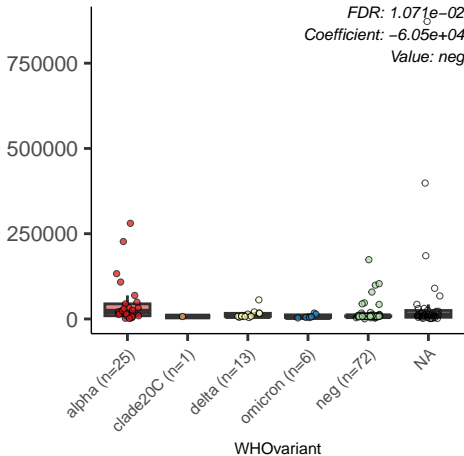

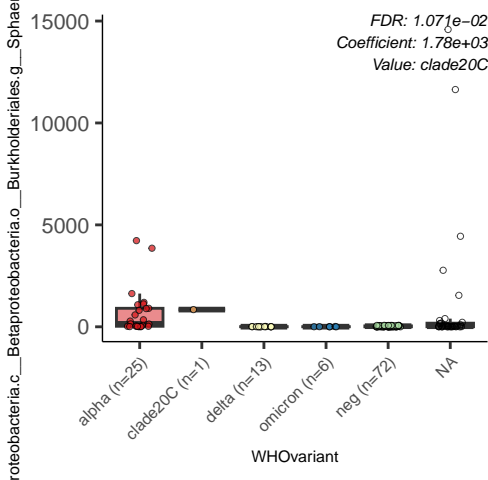

d\_\_Bacteria.p\_\_Bacteroidetes.c\_\_Sphingobacteriia

FDR:  $1.073e-02$   
Coefficient:  $-2.97e+03$   
Value: omicron

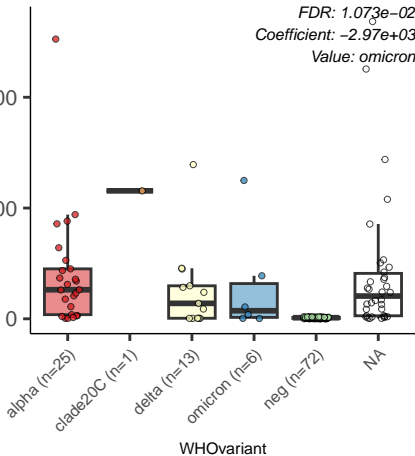

d\_\_Bacteria.p\_\_Bacteroidetes.c\_\_Sphingobacteriia.o\_\_Sphing

FDR:  $1.073e-02$   
Coefficient:  $-2.97e+03$   
Value: omicron

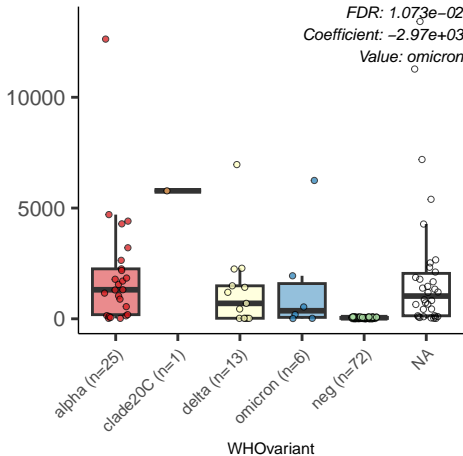

tertia.p\_\_Bacteroidetes.c\_\_Sphingobacteriia.o\_\_Sphingobacteriales

FDR:  $1.073e-02$   
Coefficient:  $-2.97e+03$   
Value: omicron

10000

5000

0

alpha (n=25)

clade20C (n=1)

delta (n=13)

omicron (n=6)

neg (n=72)

NA

WHOvariant

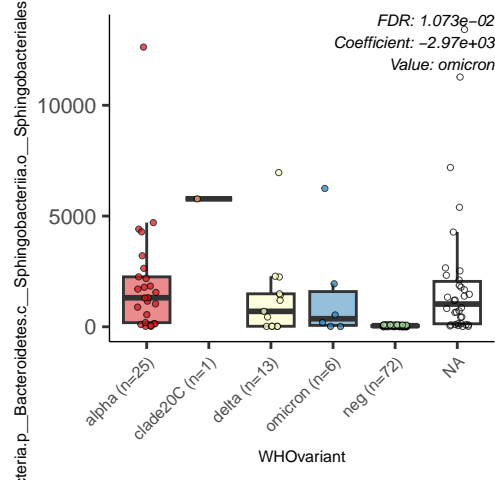

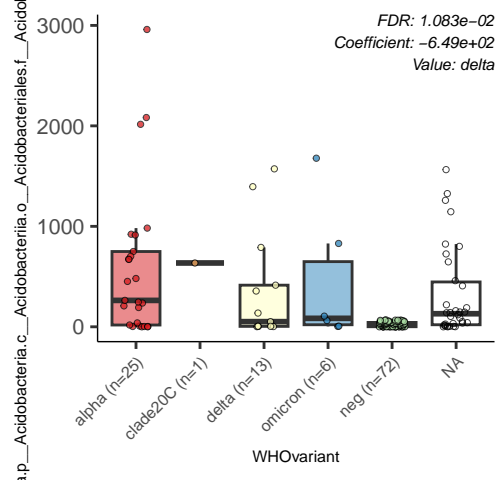

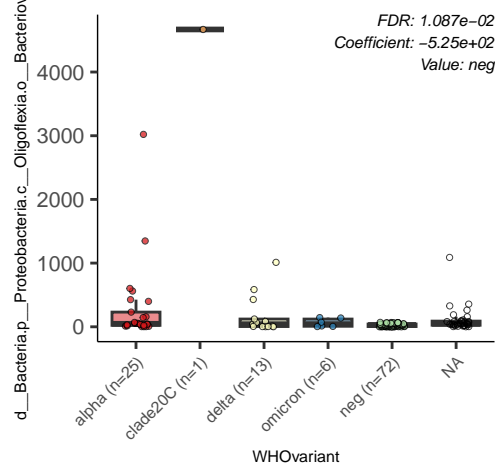



acteria.p\_Firmicutes.c\_Tissierellia.o\_Tissierellales.f\_Peptoniphila

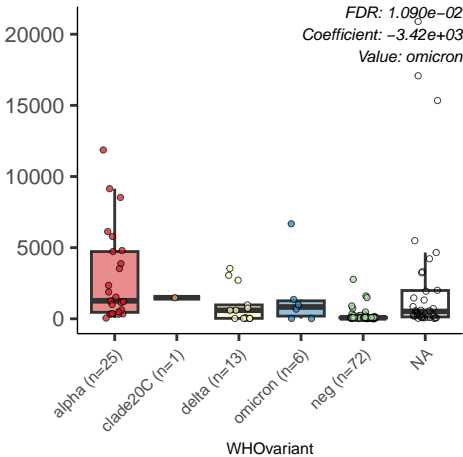

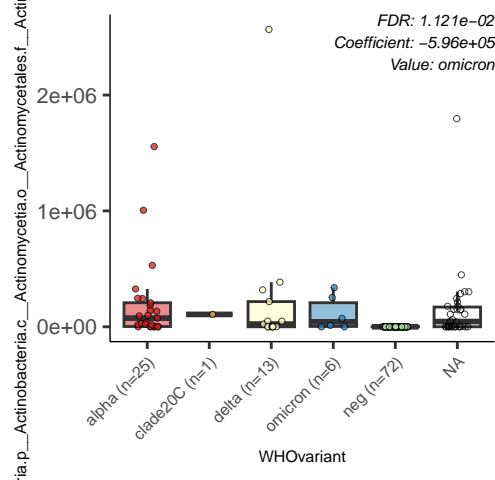

d\_\_Bacteria.p\_\_Proteobacteria.c\_\_Gammaproteobacteria.o\_\_Pse

FDR:  $1.126e-02$   
Coefficient:  $-1.24e+04$   
Value: neg

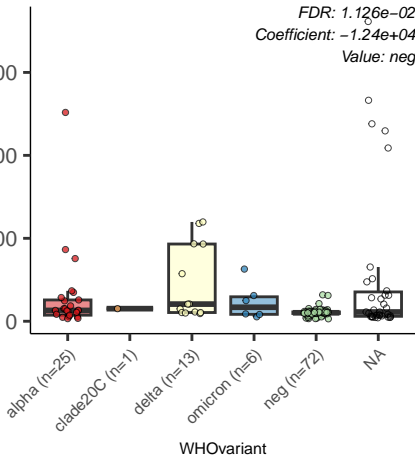

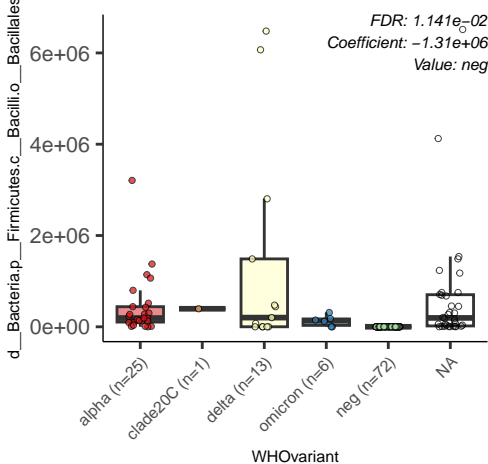

terial.c\_\_Gammaproteobacteria.o\_\_Alteromonadales.f\_\_Shewanella

FDR:  $1.143 \times 10^{-2}$   
Coefficient:  $-2.27 \times 10^2$   
Value: neg

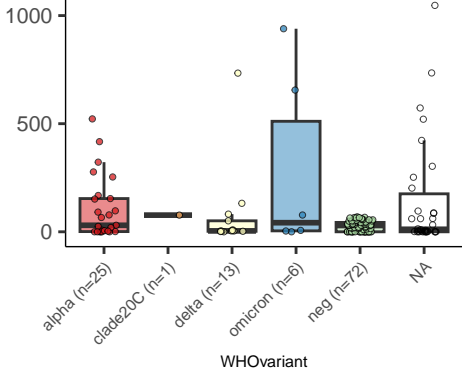

Gammaproteobacteria.o\_\_Pseudomonadales.f\_\_Pseudomonadaceae

FDR:  $1.163e-02$   
Coefficient:  $-2.90e+02$   
Value: neg

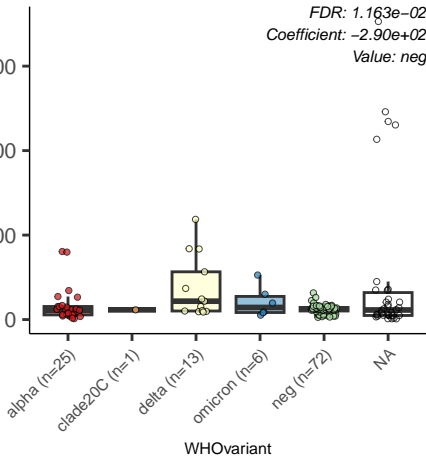

icutes.c\_\_Bacilli.o\_\_Lactobacillales.f\_\_Streptococcaceae.g\_\_Streptococcus

*FDR: 1.170e-02*  
*Coefficient: 1.15e+02*  
*Value: delta*

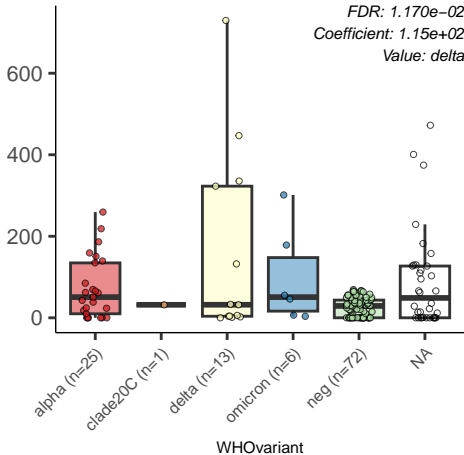

FDR:  $1.180e-02$   
Coefficient:  $-1.24e+04$   
Value: neg

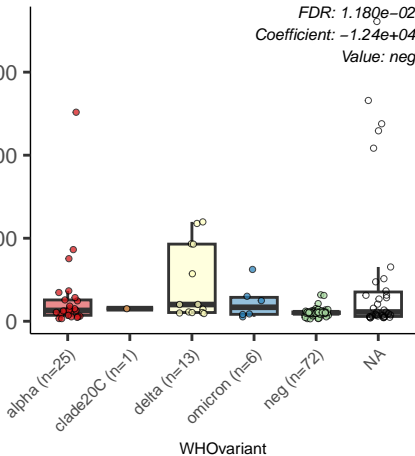



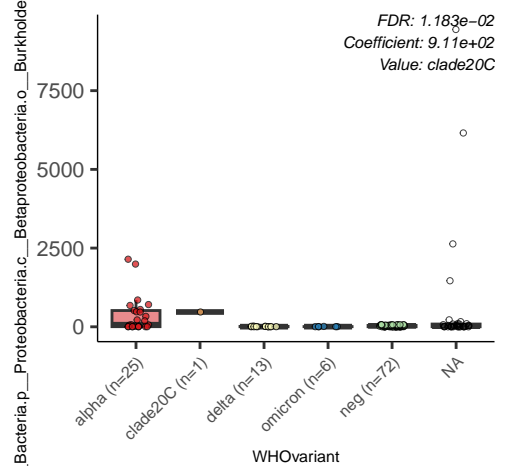

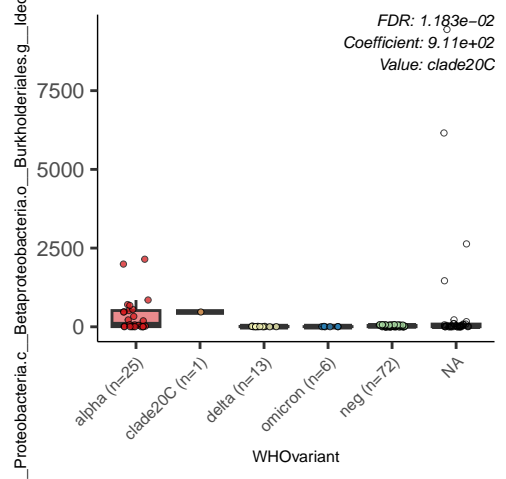

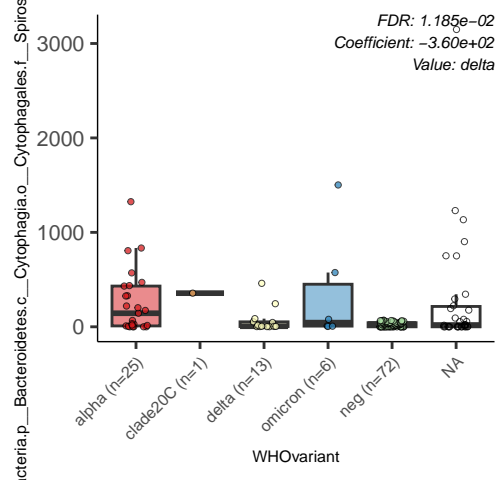

cteroidetes.c\_\_Cytophagia.o\_\_Cytophagales.f\_\_Spirosomaceae.g

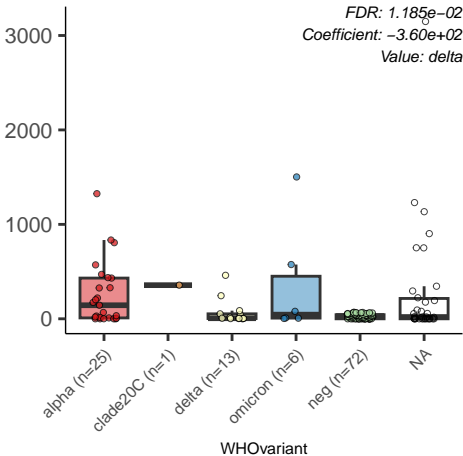

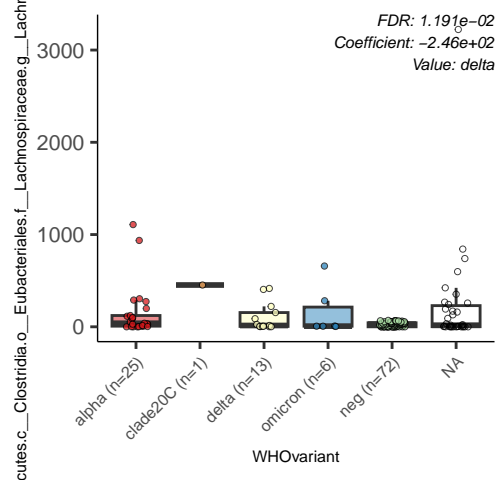

unicutes.c\_\_Tissierellia.o\_\_Tissierellales.f\_\_Peptoniphilaceae.g\_\_Ana

*FDR: 1.194e-02*  
*Coefficient: -4.58e+02*  
*Value: delta*

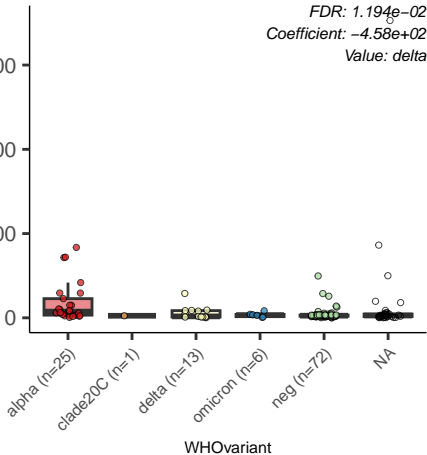

Proteobacteria.c\_\_Betaproteobacteria.o\_\_Burkholderiales.f\_\_Com

FDR: 1.194e-02  
Coefficient: 8.20e+02  
Value: clade20C

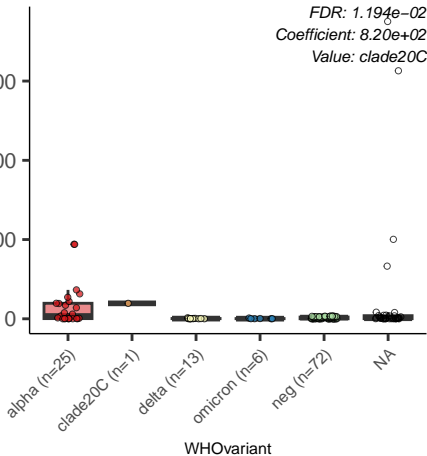

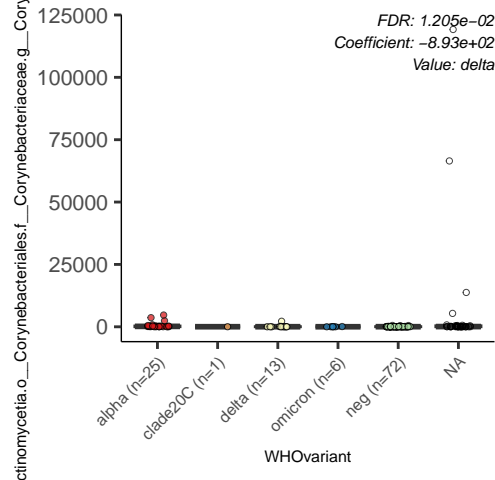



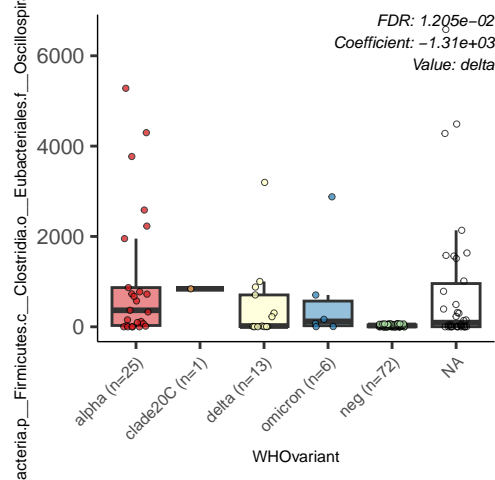

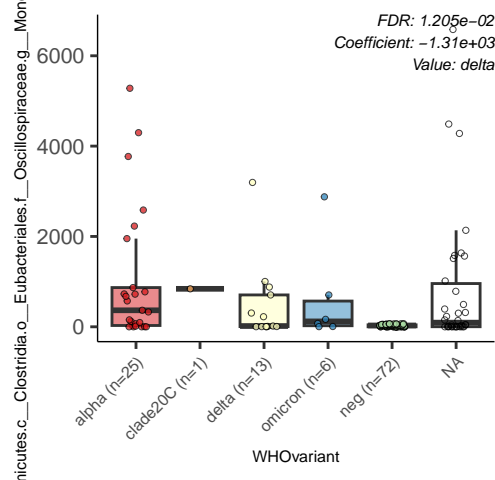

mmaproteobacteria.o\_\_Pasteurellales.f\_\_Pasteurellaceae.g\_\_Aggr

*FDR: 1.206e-02*  
*Coefficient: 1.56e+03*  
*Value: delta*

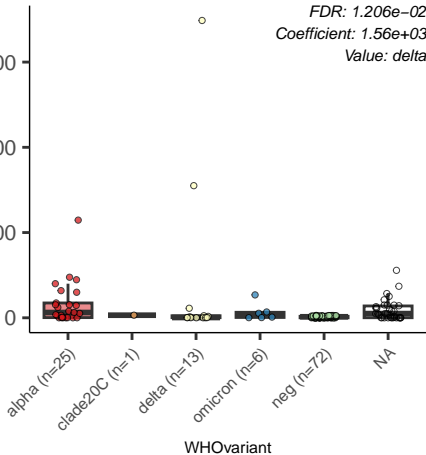

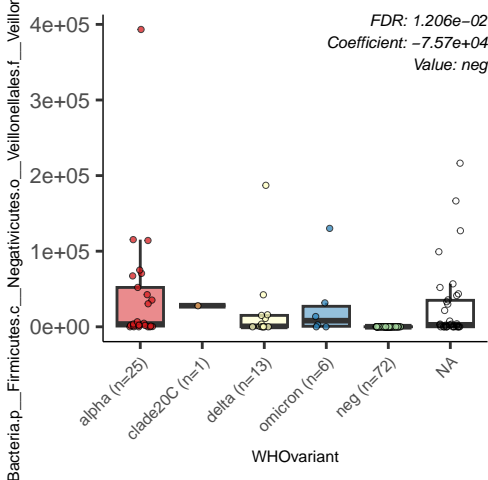

a.p\_\_Firmicutes.c\_\_Clostridia.o\_\_Eubacteriales.f\_\_Desulfitobacteria

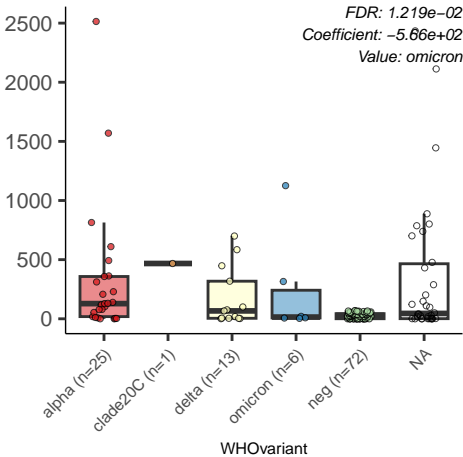

d\_\_Bacteria.p\_\_Bacteroidetes.c\_\_Sphingobacteriia

FDR:  $1.232e-02$   
Coefficient:  $-2.45e+03$   
Value: delta

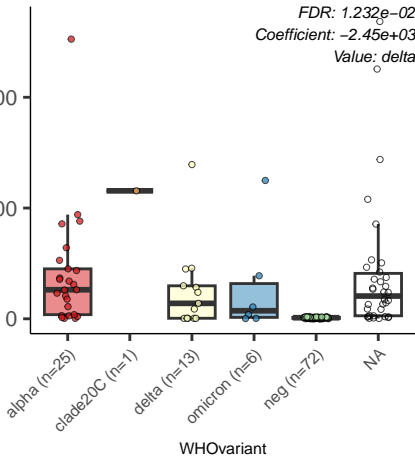

d\_\_Bacteria.p\_\_Bacteroidetes.c\_\_Sphingobacteriia.o\_\_Sphing

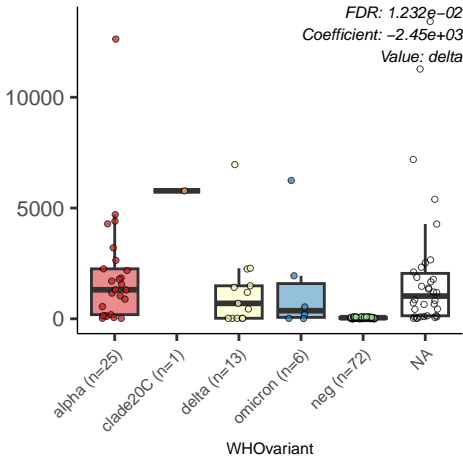

acteria.p\_\_Bacteroidetes.c\_\_Sphingobacteriia.o\_\_Sphingobacteriales

FDR:  $1.232e-02$   
Coefficient:  $-2.45e+03$   
Value: delta

10000

5000

0

alpha (n=25)

clade20C (n=1)

delta (n=13)

omicron (n=6)

neg (n=72)

NA

WHOvariant

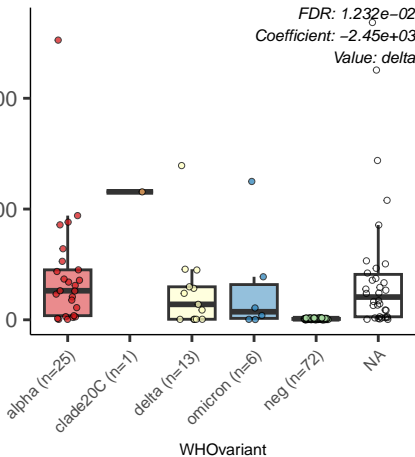



Betaproteobacteria.o\_\_Burkholderiales.f\_\_Comamonadaceae.g

FDR:  $1.241e-02$   
Coefficient:  $8.03e+02$   
Value: clade20C

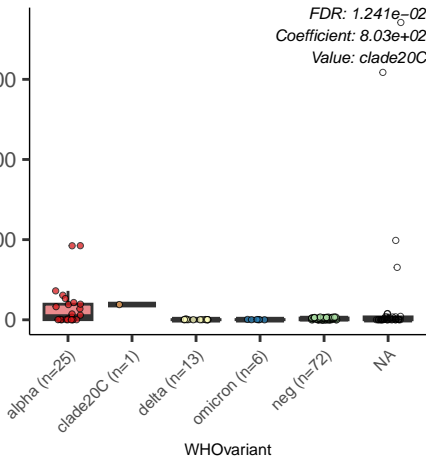

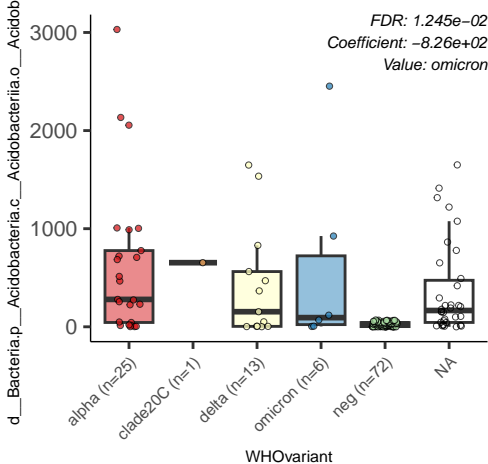

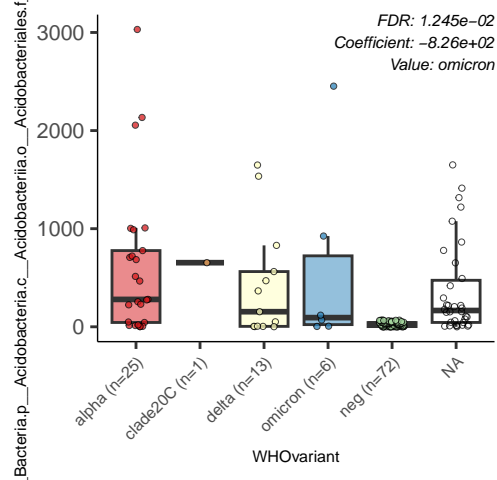

eria.c\_Actinomycetia.o\_Micrococcales.f\_Microbacteriaceae.g

FDR:  $1.248e-02$   
Coefficient:  $-5.55e+03$   
Value: delta

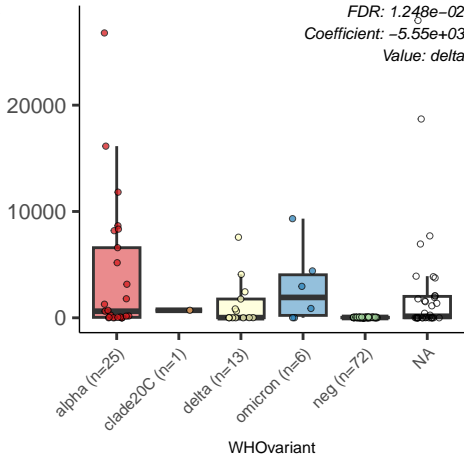

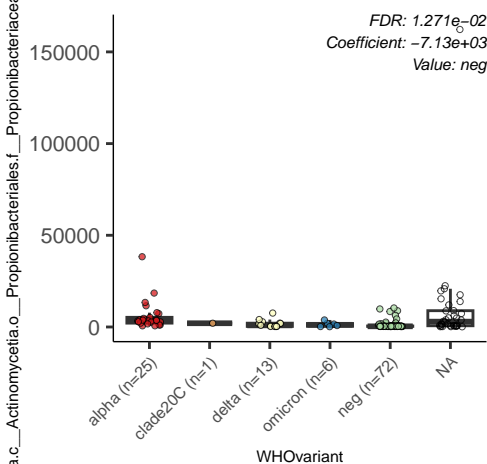

Bacteroidetes.c\_\_Bacteroidia.o\_\_Bacteroidales.f\_\_Rikenellaceae.g

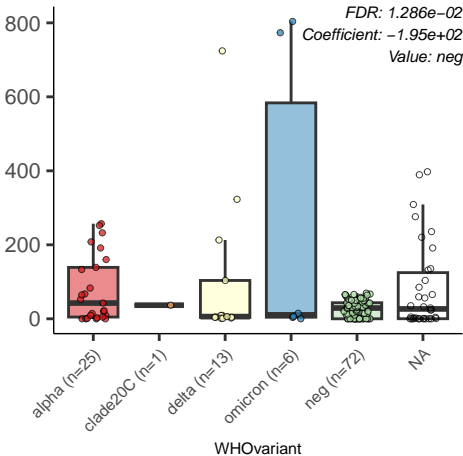

a.p.\_Proteobacteria.c\_Alphaproteobacteria.o\_Hyphomicrobiales.

FDR:  $1.296e-02$   
Coefficient:  $3.42e+02$   
Value: clade20C

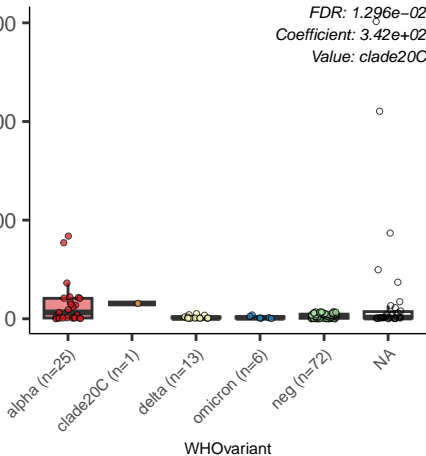

p\_\_Bacteroidetes.c\_\_Chitinophagia.o\_\_Chitinophagales.f\_\_Chitinop

FDR: 1.298e-02  
Coefficient: 9.74e+02  
Value: clade20C

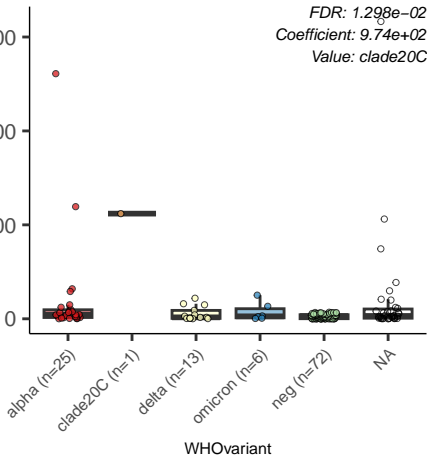



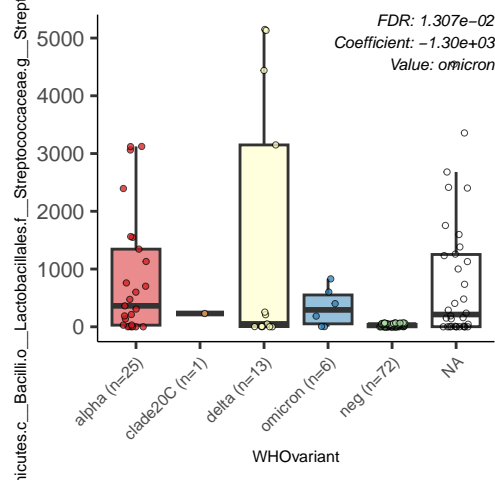



psilonproteobacteria.o\_\_Campylobacterales.f\_\_Campylobacteraceae

FDR:  $1.312e-02$   
Coefficient:  $-9.26e+02$   
Value: omicron

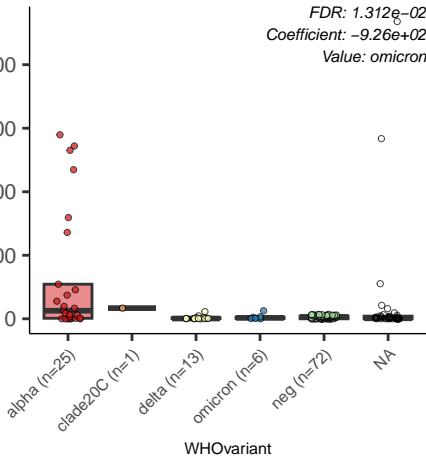

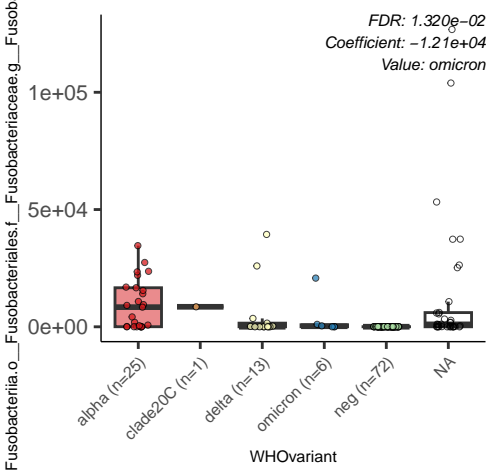



bacteria.c\_\_Fusobacteriia.o\_\_Fusobacteriales.f\_\_Fusobacteriaceae

FDR:  $1.326e-02$   
Coefficient:  $-1.13e+03$   
Value: omicron

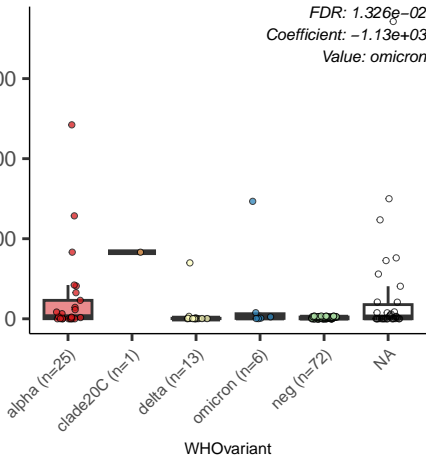

FDR: 1.326e-02  
Coefficient: -1.27e+03  
Value: omicron

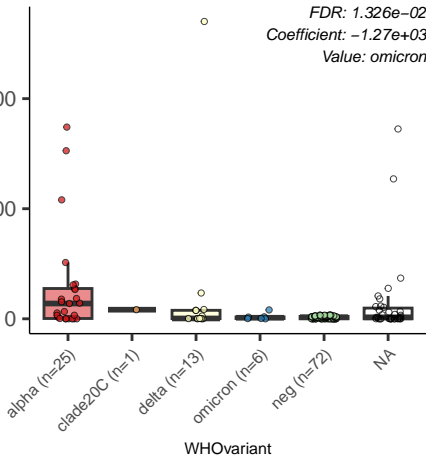

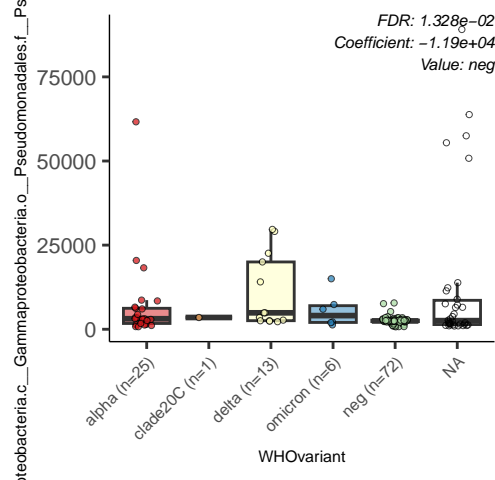



a.p\_\_Firmicutes.c\_\_Clostridia.o\_\_Eubacteriales.f\_\_Desulfitobacteria

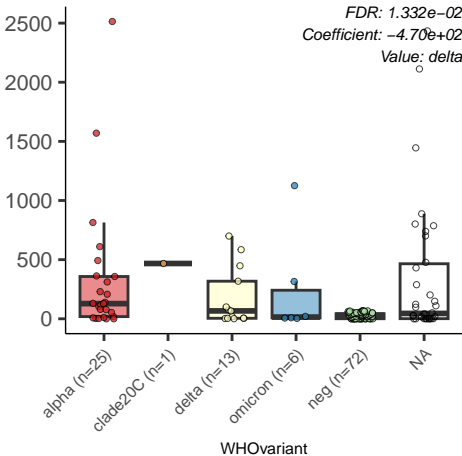

p\_\_Proteobacteria.c\_\_Betaproteobacteria.o\_\_Burkholderiales.f\_\_B

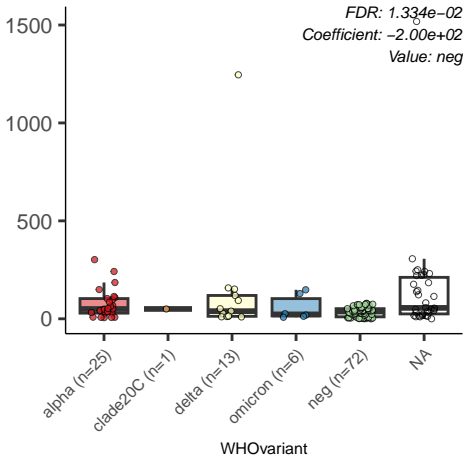

a.p\_\_Proteobacteria.c\_\_Betaproteobacteria.o\_\_Neisseriales.f\_\_Neis

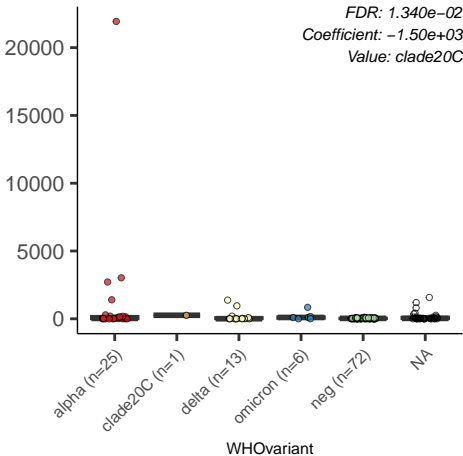

bacteria.c\_\_Betaproteobacteria.o\_\_Neisseriales.f\_\_Neisseriaceae.g\_\_

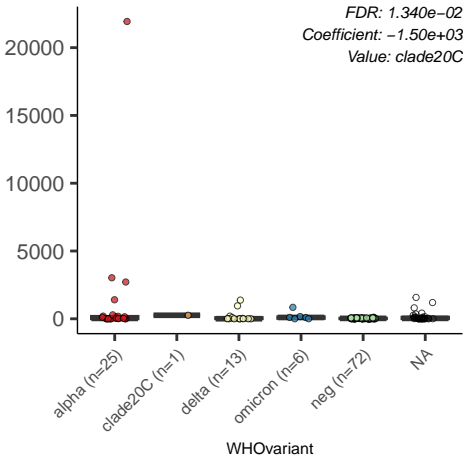

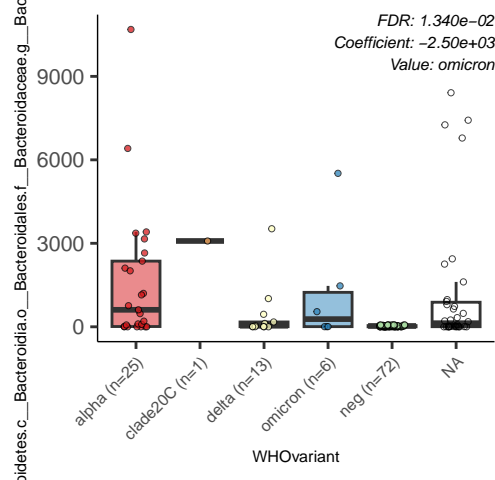

*FDR: 1.353e-02*

Coefficient:  $-1.17e+04$

Value: delta

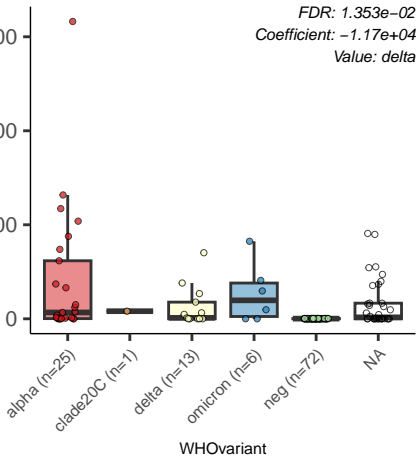

Bacteria.p\_Actinobacteria.c\_Actinomycetia.o\_Corynebacteriales

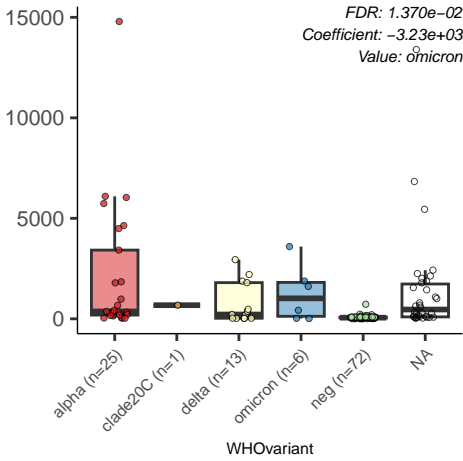

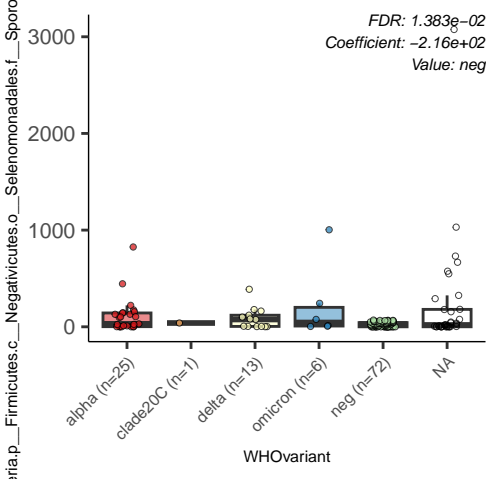



cutes.c\_\_Negativicutes.o\_\_Selenomonadales.f\_\_Sporomusaceae.g

FDR:  $1.383e-02$   
Coefficient:  $-2.16e+02$   
Value: neg

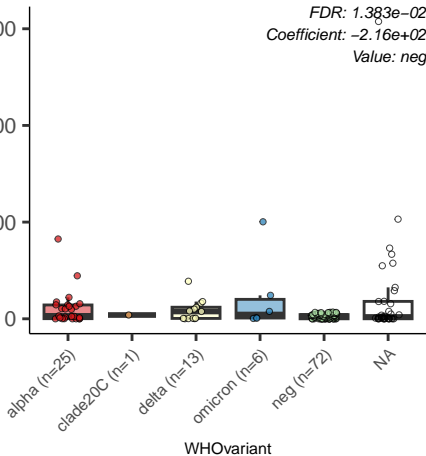

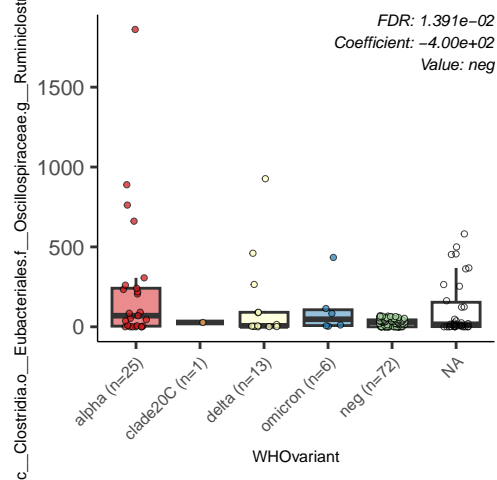

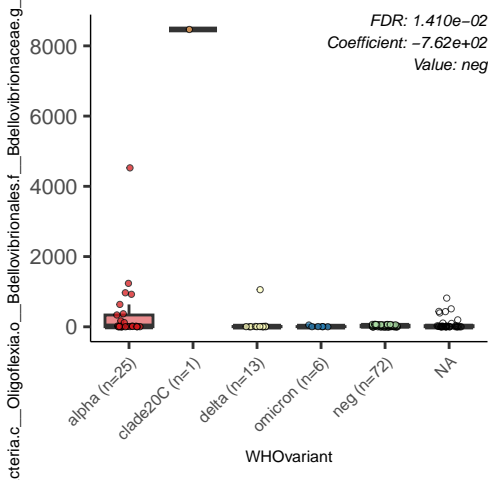

bacteria.p\_Firmicutes.c\_Clostridia.o\_Eubacteriales.f\_Peptostrept

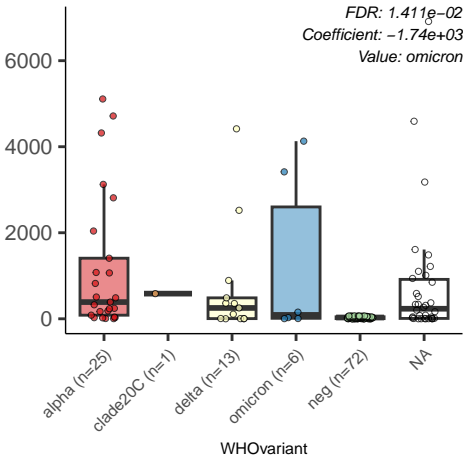

FDR:  $1.411e-02$   
Coefficient:  $-1.74e+03$   
Value: omicron

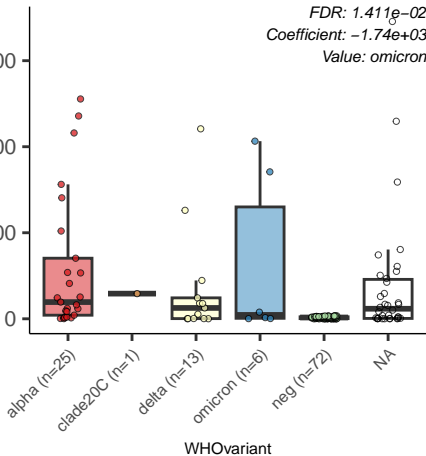

a.c\_\_Actinomycetia.o\_\_Candidatus.Nanopelagiales.f\_\_Candidatus

FDR:  $1.426e-02$   
Coefficient:  $-2.49e+02$   
Value: delta

1000

500

0

alpha (n=25)

clade20C (n=1)

delta (n=13)

omicron (n=6)

neg (n=72)

NA

WHOvariant

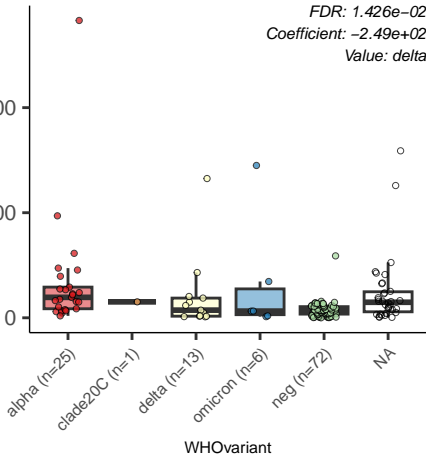

ctinobacteria.c\_\_Actinomycetia.o\_\_Micrococcales.f\_\_Micrococcaceae

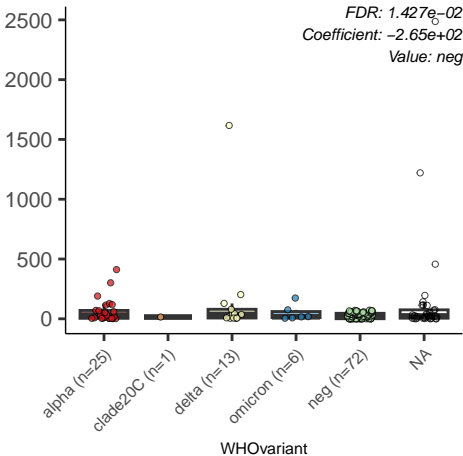

d\_\_Bacteria.p\_\_Firmicutes.c\_\_Tissierellia.o\_\_Tissierellales.f\_\_Pe

FDR:  $1.433\text{e-}02$   
Coefficient:  $-1.47\text{e}+04$   
Value: omicron

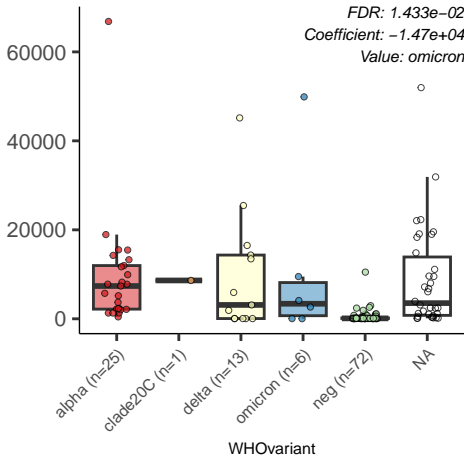



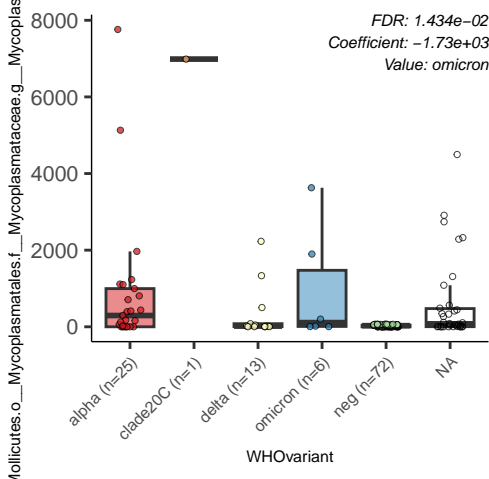

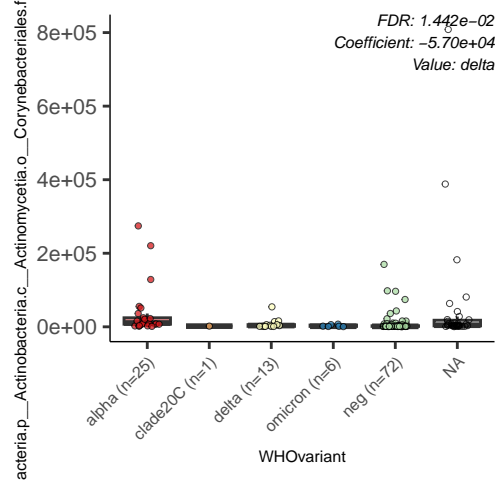

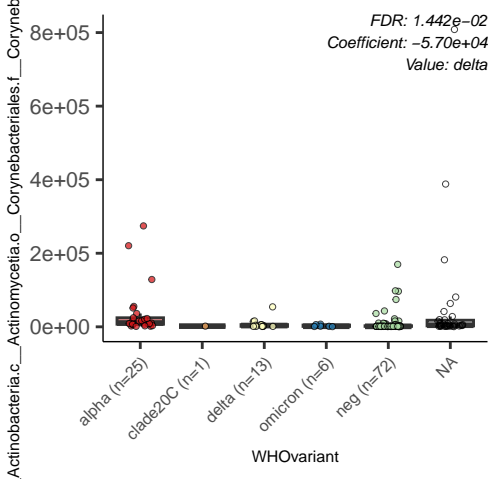

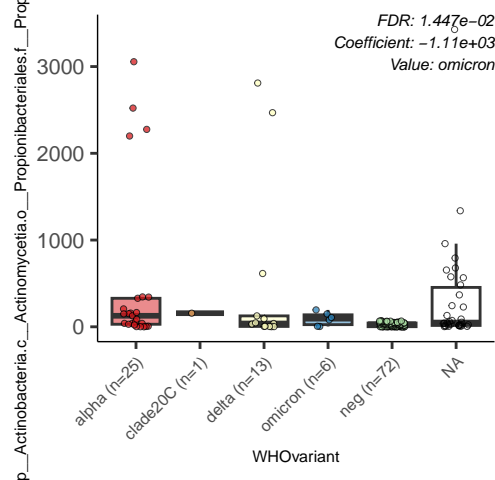

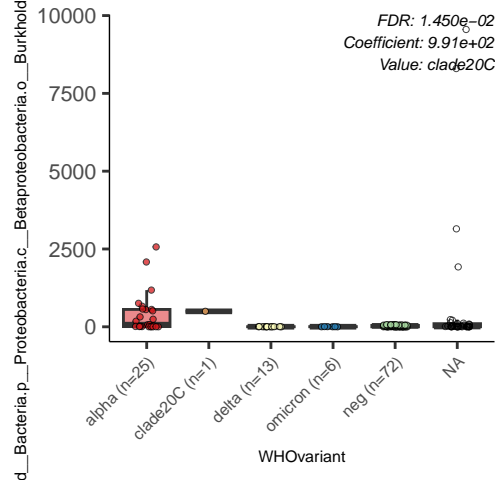

p\_\_Proteobacteria.c\_\_Betaproteobacteria.o\_\_Burkholderiales.g\_\_lr

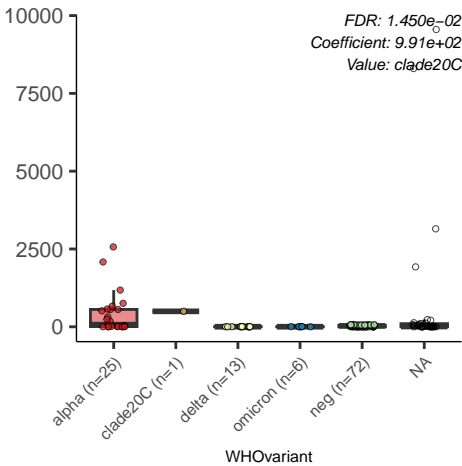

Bacteria.p\_Actinobacteria.c\_Actinomycetia.o\_Micrococcales.f

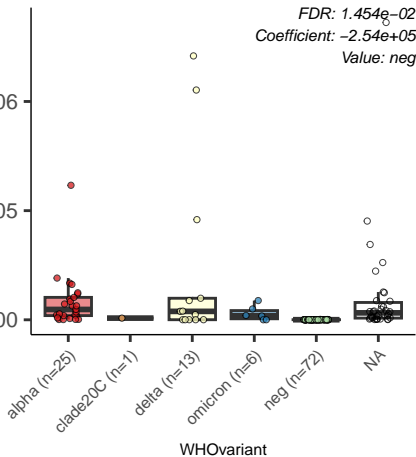

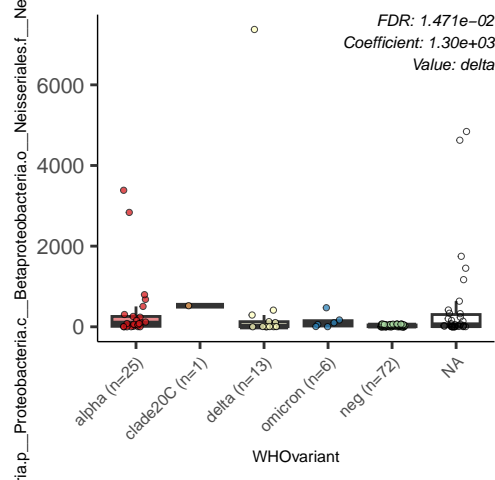



obacteria.c\_\_Betaproteobacteria.o\_\_Neisseriales.f\_\_Neisseriaceae.

FDR: 1.471e-02  
Coefficient: 1.30e+03  
Value: delta

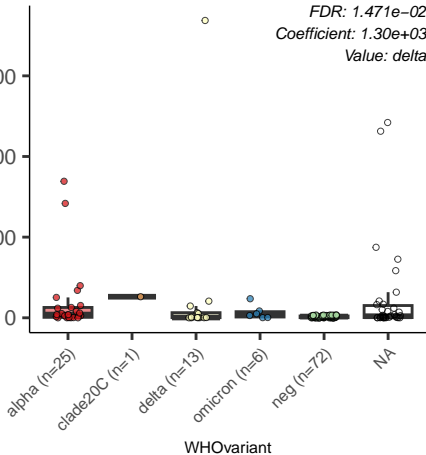

FDR: 1.483e-02  
Coefficient: -5.32e+02  
Value: omicron

Box plot showing the distribution of WHO variants across different categories. The y-axis represents a value (likely log-odds) ranging from -100 to 100. The x-axis categories are alpha (n=25), clade20C (n=1), delta (n=13), omicron (n=6), neg (n=72), and NA. The alpha variant shows a positive median, while others are near zero. Statistical values: FDR: 1.483e-02, Coefficient: -5.32e+02, Value: omicron.

Coefficient:  $-5.32e+02$

Value: omicron

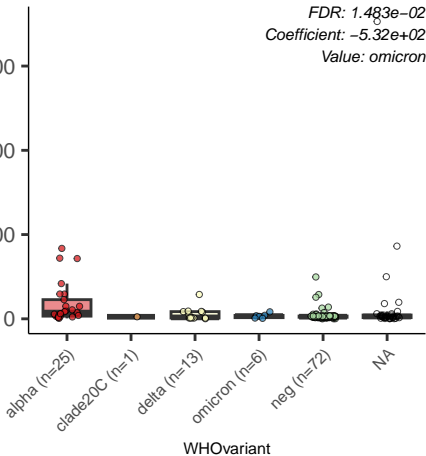

WHOvariant

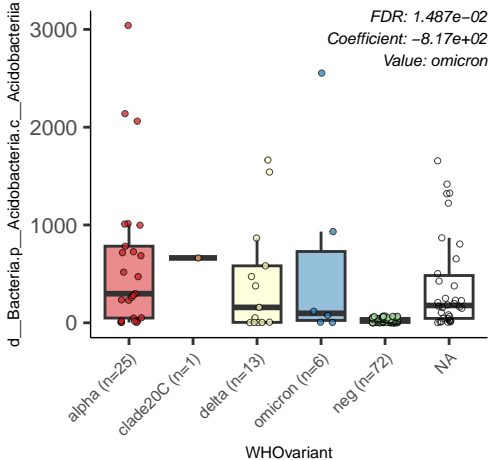

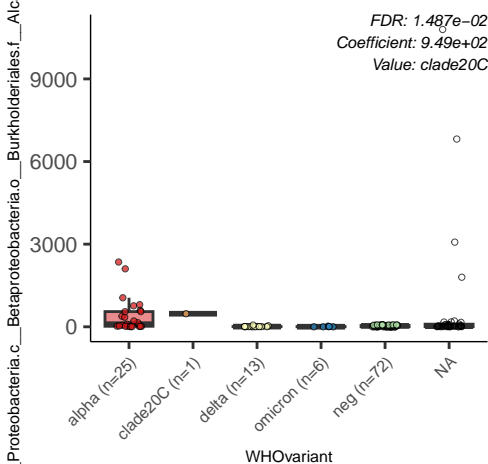

Firmicutes.c\_\_Negativicutes.o\_\_Veillonellales.f\_\_Veillonellaceae.g

FDR:  $1.496e-02$   
Coefficient:  $-3.51e+04$   
Value: neg

150000

100000

50000

0

alpha (n=25)

clade20C (n=1)

delta (n=13)

omicron (n=6)

neg (n=72)

NA

WHOvariant

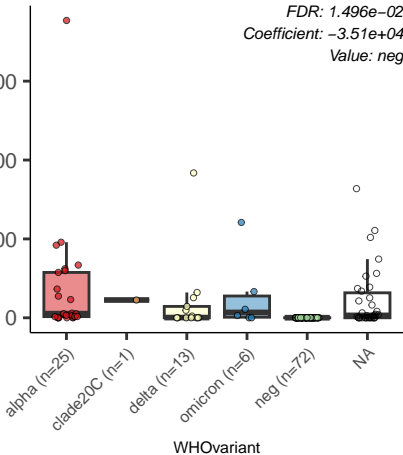

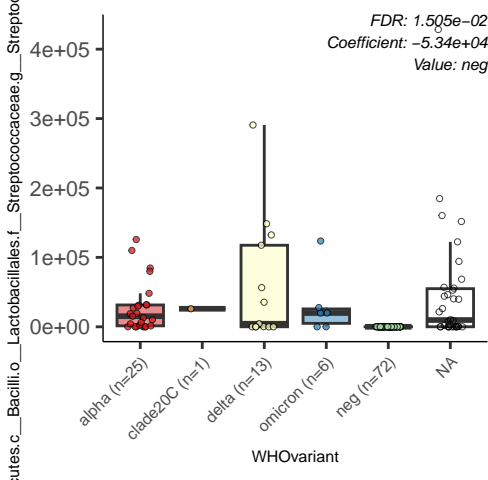

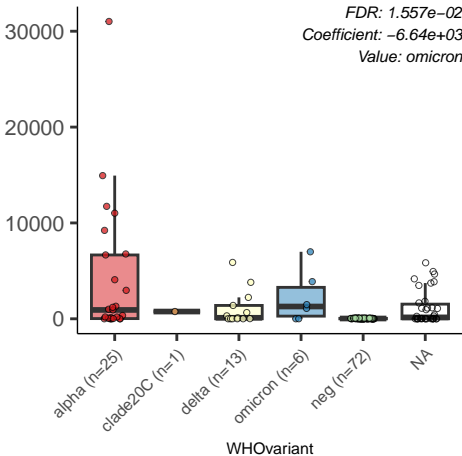

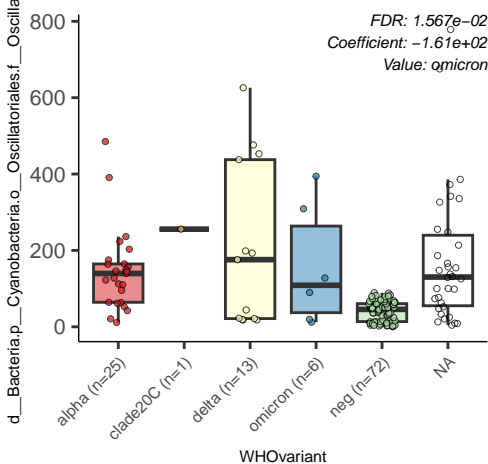



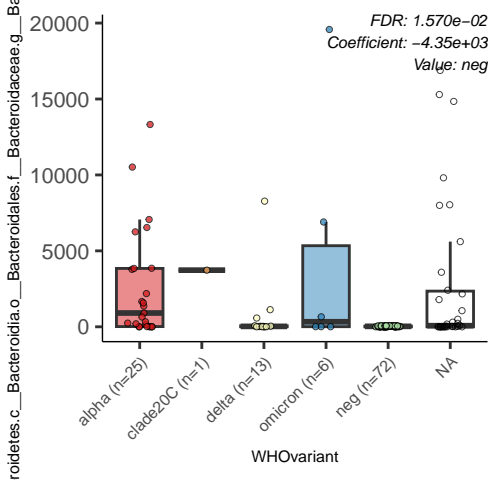

Actinomycetia.o\_\_Corynebacteriales.f\_\_Mycobacteriaceae.g\_\_My

FDR: 1.583e-02  
Coefficient: -3.26e+03  
Value: delta

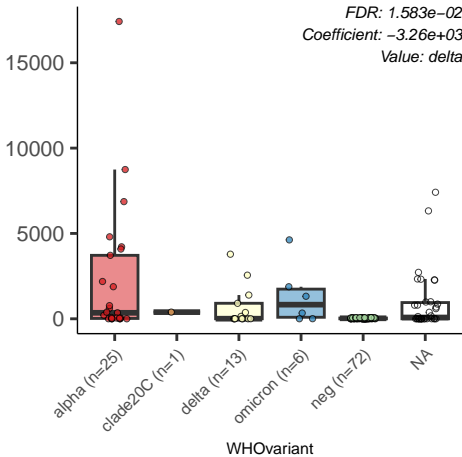

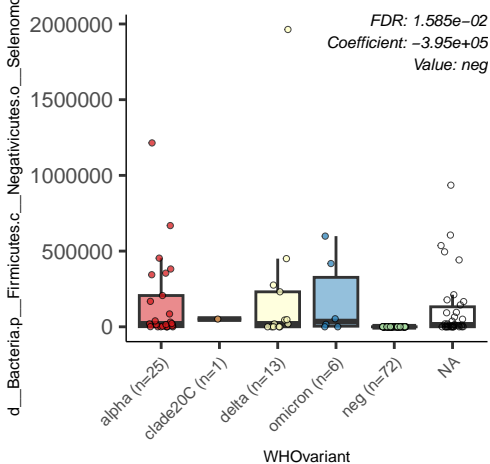

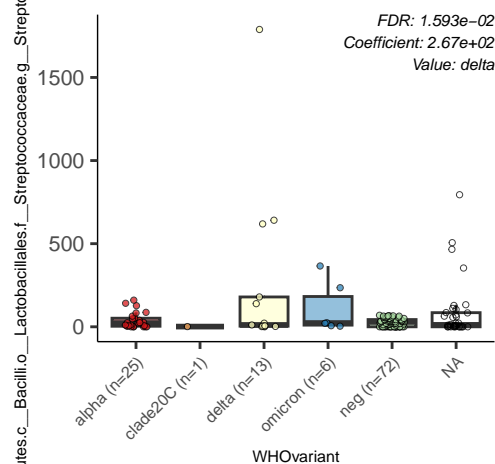

Bacteria.p\_Firmicutes.c\_Clostridia.o\_Eubacteriales.f\_Eubacteri

*FDR: 1.615e-02*  
*Coefficient: -3.50e+02*  
*Value: omicron*

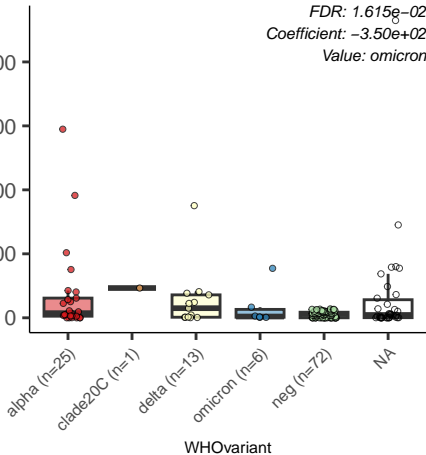

irmicutes.c\_\_Clostridia.o\_\_Eubacteriales.f\_\_Eubacteriaceae.g\_\_Alk

FDR:  $1.615e-02$   
Coefficient:  $-3.50e+02$   
Value: omicron

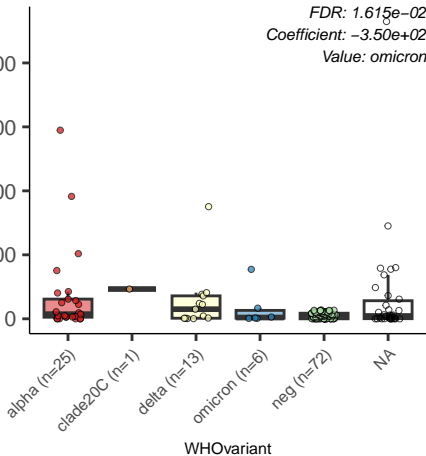

Firmicutes.c\_\_Clostridia.o\_\_Eubacteriales.f\_\_Vallitaleaceae.g\_\_Val

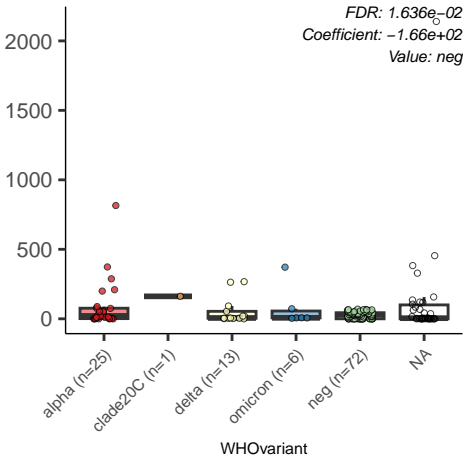

Negativicutes.o\_\_Selenomonadales.f\_\_Selenomonadaceae.g\_\_Se

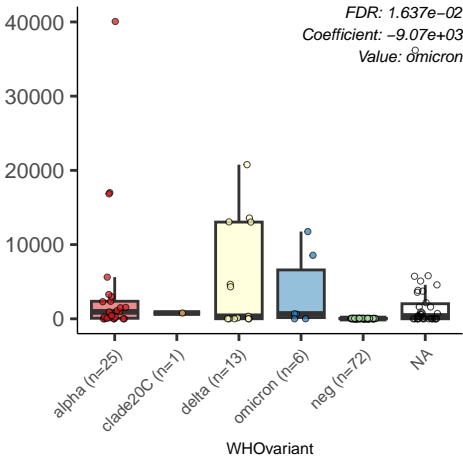



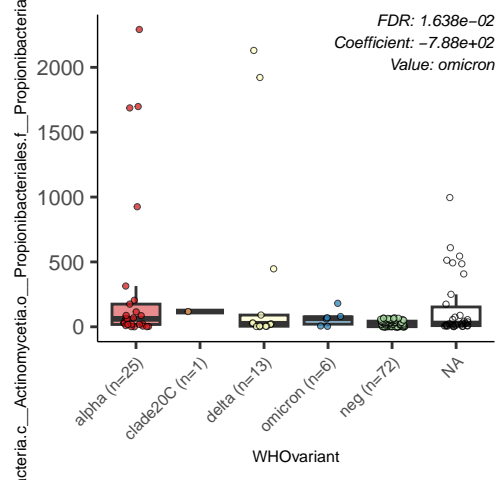

*FDR: 1.658e-02*  
*Coefficient: 4.67e+02*  
*Value: delta*

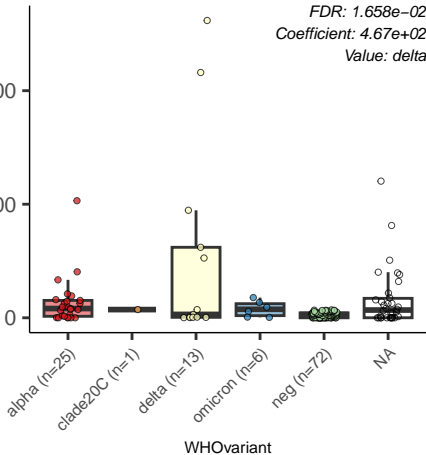

d\_\_Bacteria.p\_\_Cyanobacteria.o\_\_Oscillatoriales

FDR:  $1.676e-02$   
Coefficient:  $-7.98e+02$   
Value: neg

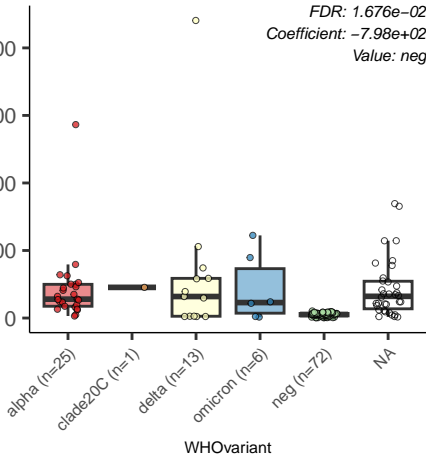

icutes.c\_\_Bacilli.o\_\_Lactobacillales.f\_\_Streptococcaceae.g\_\_Streptococcus

*FDR: 1.687e-02*  
*Coefficient: -2.68e+02*  
*Value: neg*

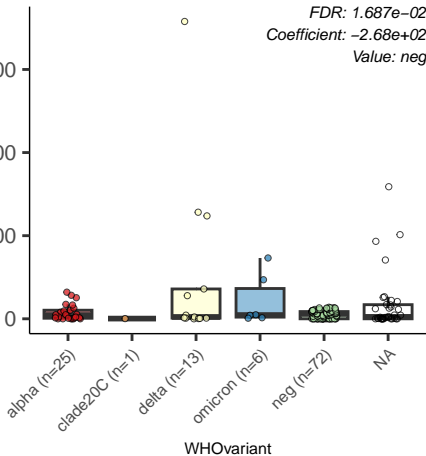

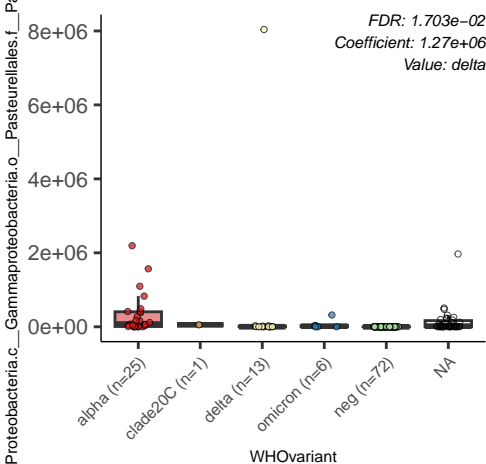

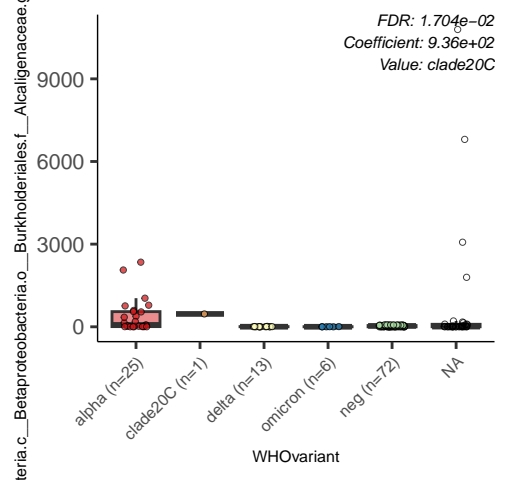

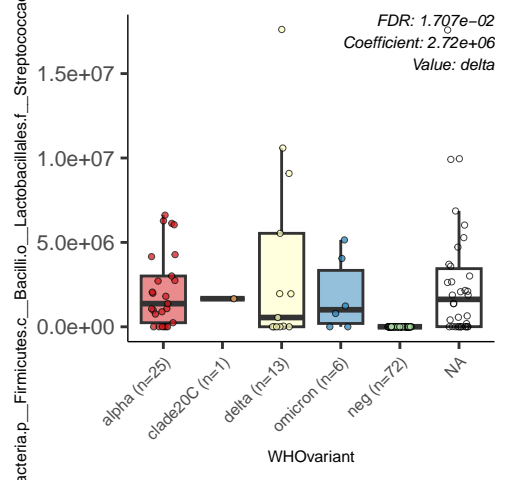

d\_Bacteria.p\_Actinobacteria.c\_Actinomycetia.o\_Candidatus.N

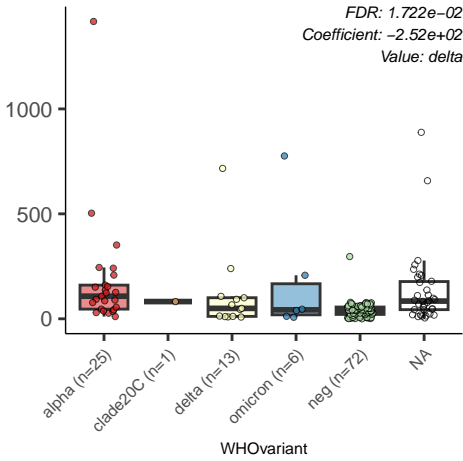



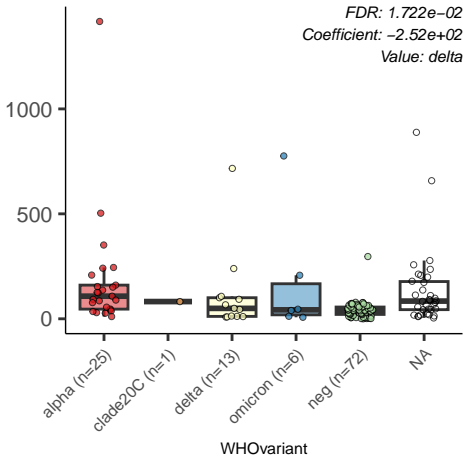

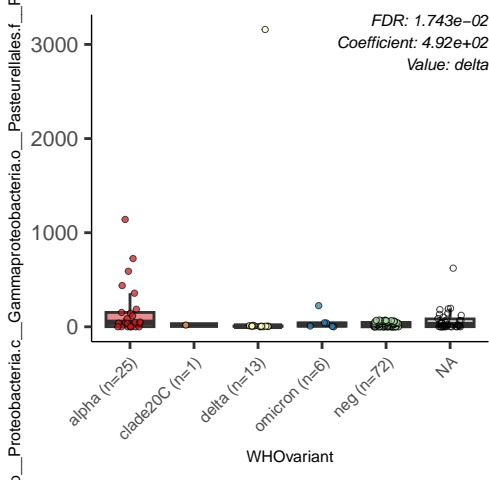

bacteria.c\_\_Gammaproteobacteria.o\_\_Pasteurellales.f\_\_Pasteurella

*FDR: 1.743e-02*  
*Coefficient: 4.92e+02*  
*Value: delta*

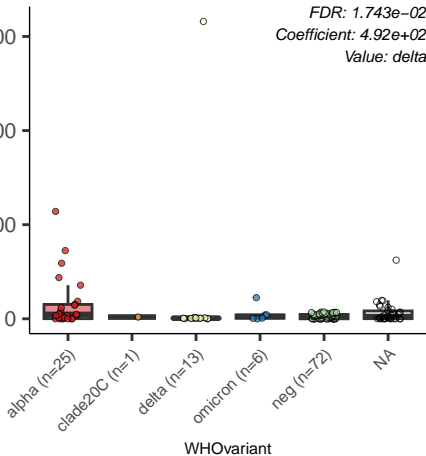

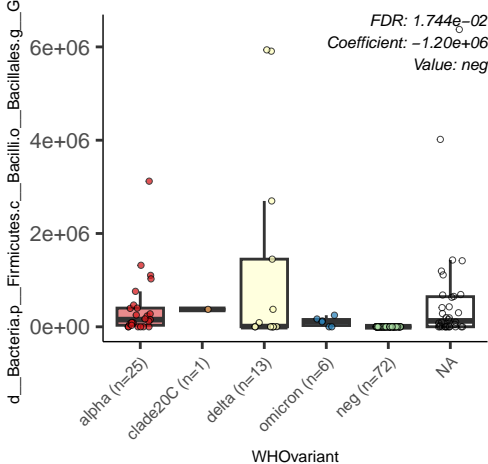

micutes.c\_\_Bacilli.o\_\_Lactobacillales.f\_\_Streptococcaceae.g\_\_Streptococcus

FDR:  $1.747 \times 10^{-2}$   
Coefficient:  $-1.21 \times 10^4$   
Value: neg

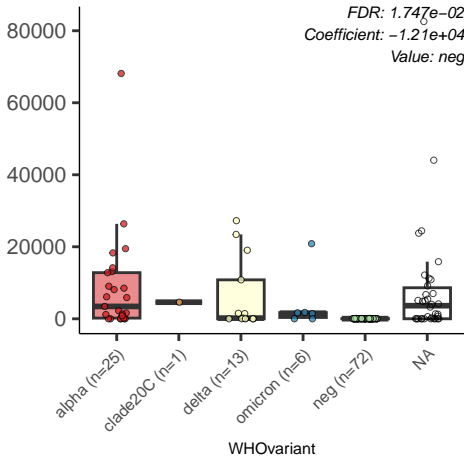

eria.p\_\_Firmicutes.c\_\_Clostridia.o\_\_Eubacteriales.f\_\_Oscillospira

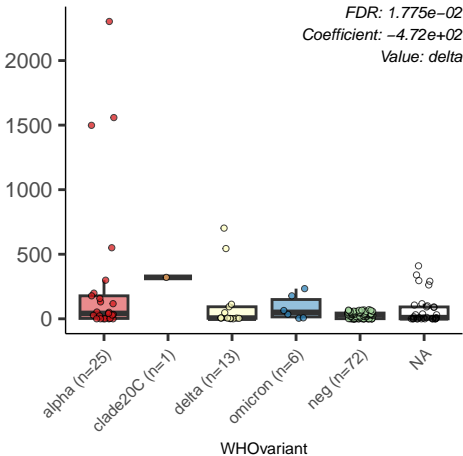

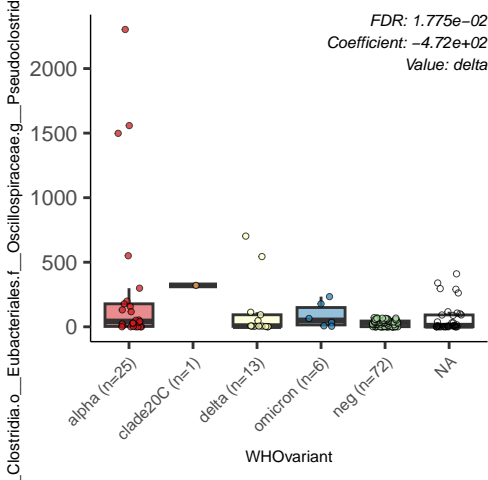

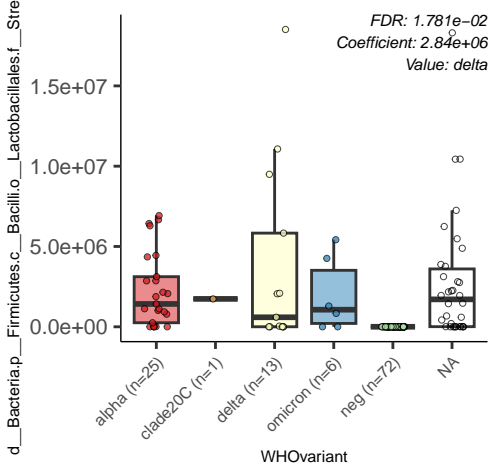



Gamma\_\_Gammaproteobacteria.o\_\_Pasteurellales.f\_\_Pasteurellaceae.g\_\_A

FDR: 1.784e-02  
Coefficient: 6.60e+03  
Value: delta

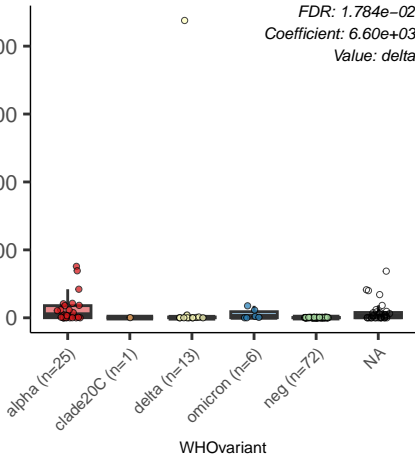

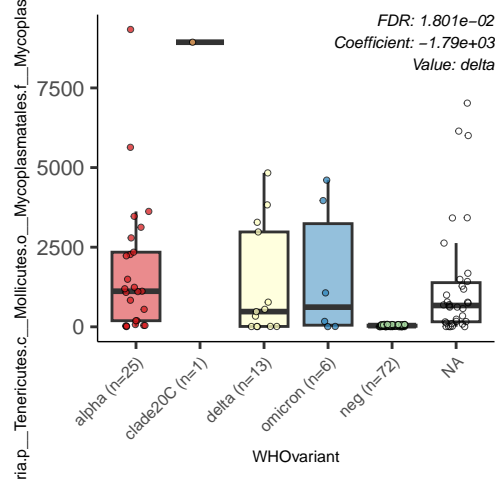

monadia.o\_\_Candidatus.Nanosynbacterales.f\_\_Candidatus.Nanosyn

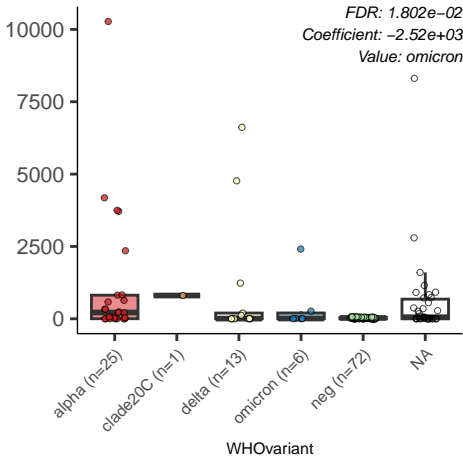

eroidetes.c\_\_Cytophagia.o\_\_Cytophagales.f\_\_Cytophagaceae.g\_\_S

FDR:  $1.828e-02$   
Coefficient:  $-3.03e+03$   
Value: neg

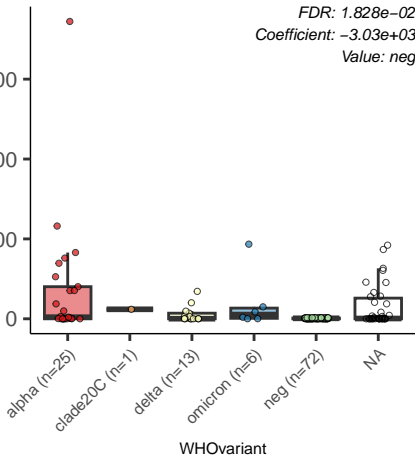

Bacteria.p\_Firmicutes.c\_Bacilli.o\_Lactobacillales.f\_Streptococ

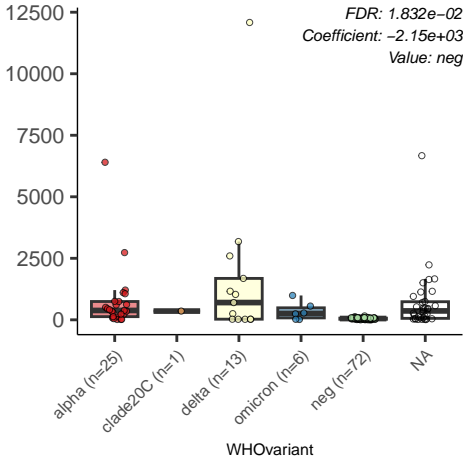

a.p\_\_Proteobacteria.c\_\_Gammaproteobacteria.o\_\_Enterobacterales

FDR: 1.845e-02  
Coefficient: 3.59e+02  
Value: delta

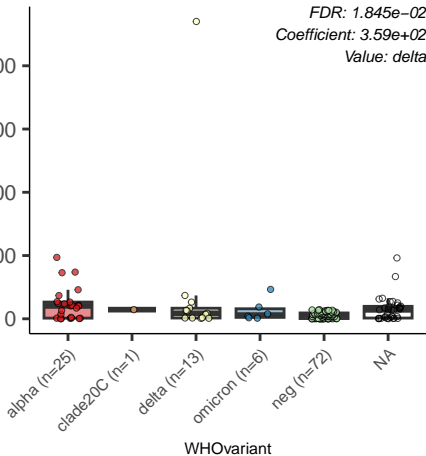

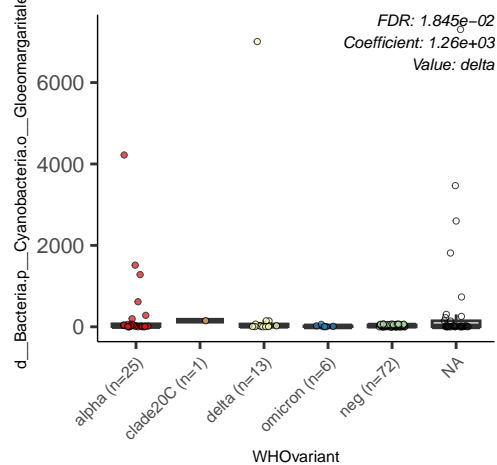

d\_Bacteria.p\_\_Cyanobacteria.o\_\_Gloeomargaritales.f\_\_Gloeos

FDR: 1.845e-02  
Coefficient: 1.26e+03  
Value: delta

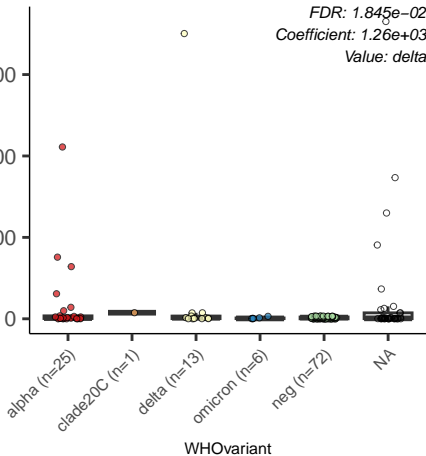







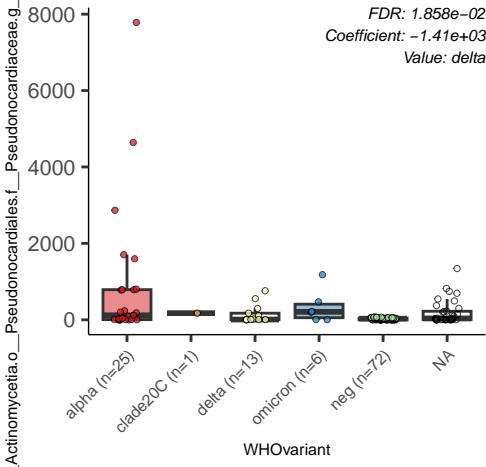

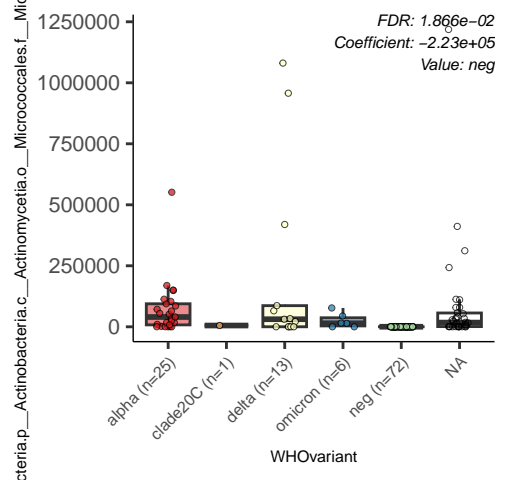

s.c\_\_Erysipelotrichia.o\_\_Erysipelotrichales.f\_\_Erysipelotrichaceae.g

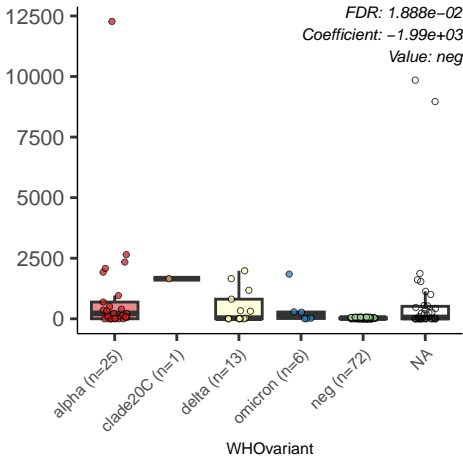

s.c\_Flavobacteriia.o\_Flavobacteriales.f\_Weeksellaceae.g\_Chry

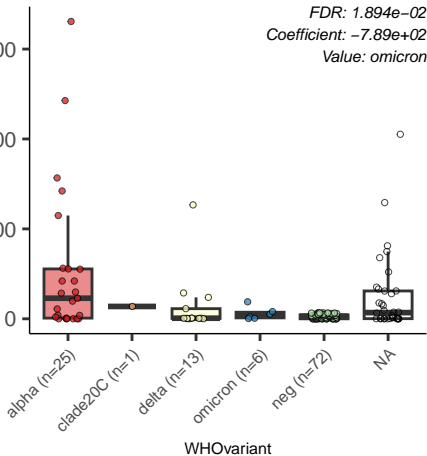

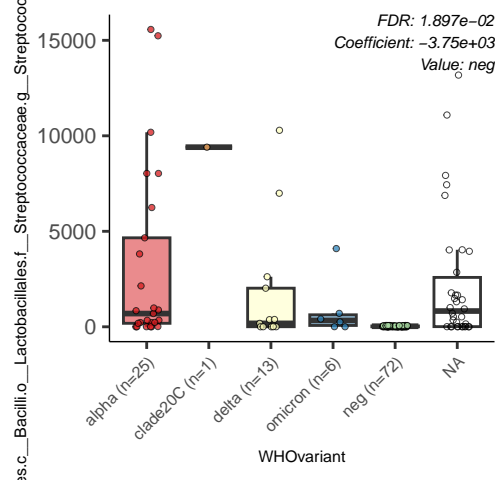

ia.p\_\_Bacteroidetes.c\_\_Cytophagia.o\_\_Cytophagales.f\_\_Cyclobacte

FDR:  $1.902e-02$   
Coefficient:  $-2.17e+02$   
Value: neg

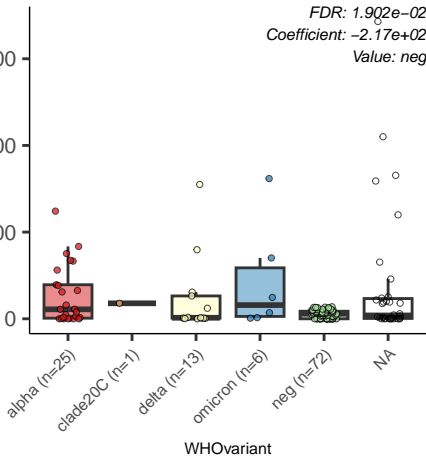



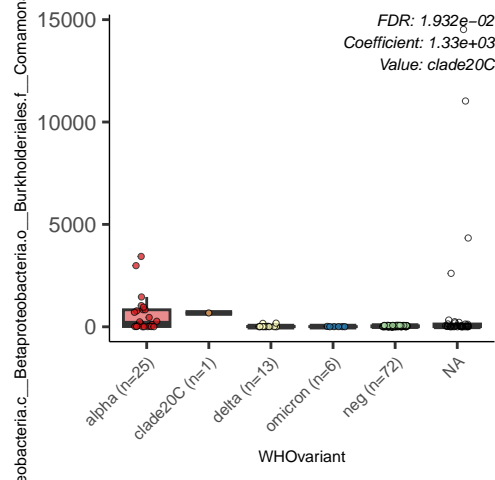

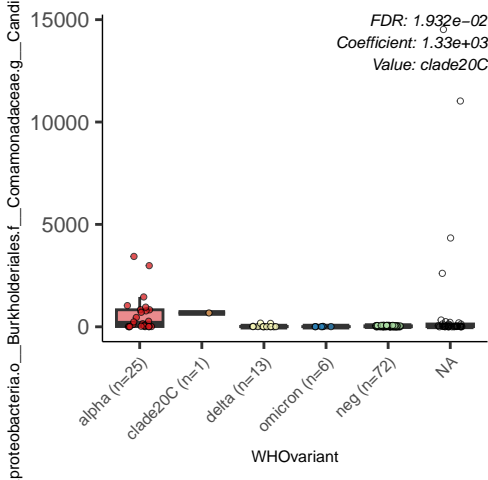

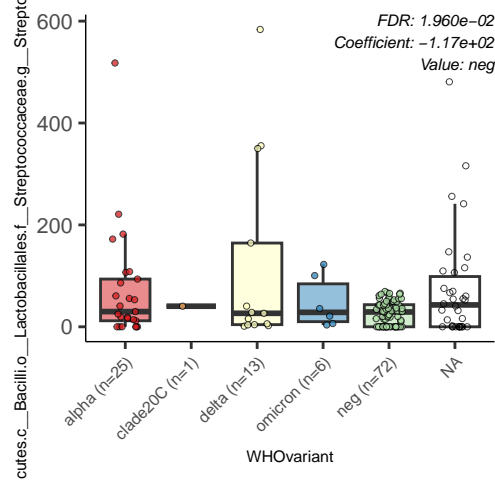

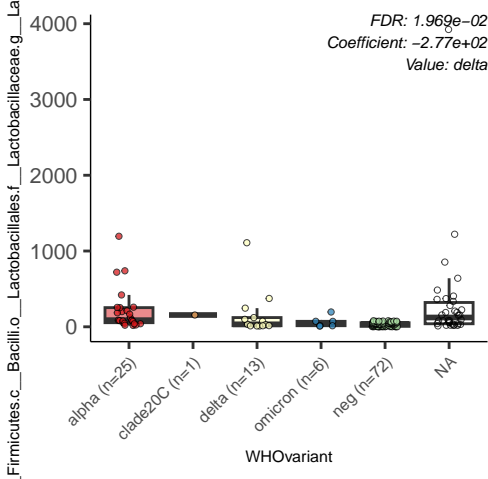

Bacteria.p\_Actinobacteria.c\_Actinomycetia.o\_Corynebacteriales

FDR:  $1.977e-02$   
Coefficient:  $-8.55e+03$   
Value: omicron

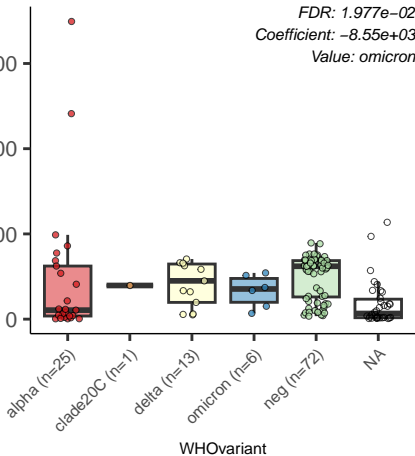

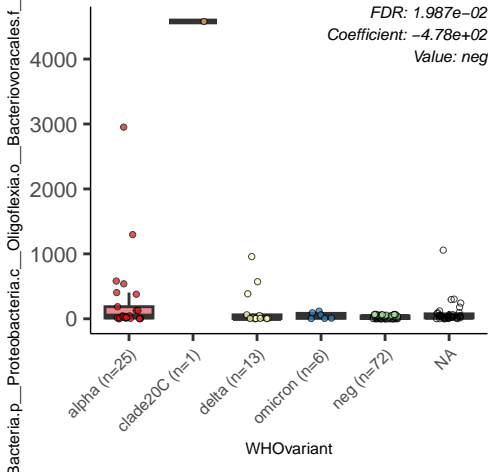

Proteobacteria.c\_\_Oligoflexia.o\_\_Bacteriovoracales.f\_\_Halobacter

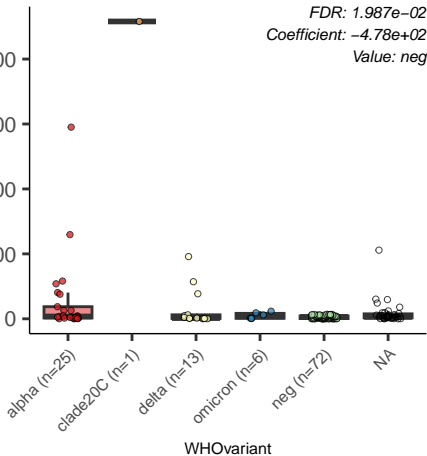

micutes.c\_\_Bacilli.o\_\_Lactobacillales.f\_\_Streptococcaceae.g\_\_Streptococcus

*FDR: 1.991e-02*  
*Coefficient: 8.39e+01*  
*Value: delta*

1000

500

0

alpha (n=25)

clade20C (n=1)

delta (n=13)

omicron (n=6)

neg (n=72)

NA

WHOvariant

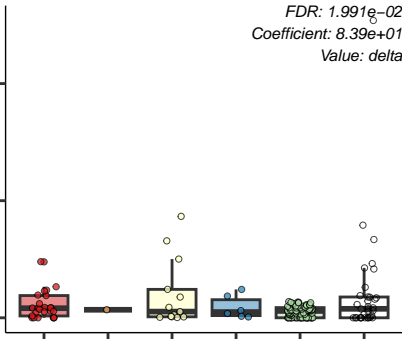



cteria.p\_\_Synergistetes.c\_\_Synergistia.o\_\_Synergistales.f\_\_Synerg

FDR: 2.017e-02  
Coefficient: -1.13e+02  
Value: neg

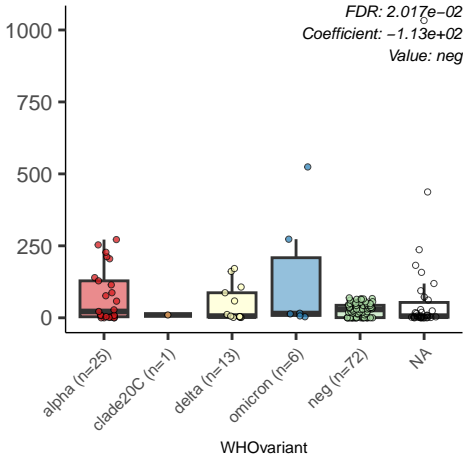

nergistetes.c\_\_Synergistia.o\_\_Synergistales.f\_\_Synergistaceae.g

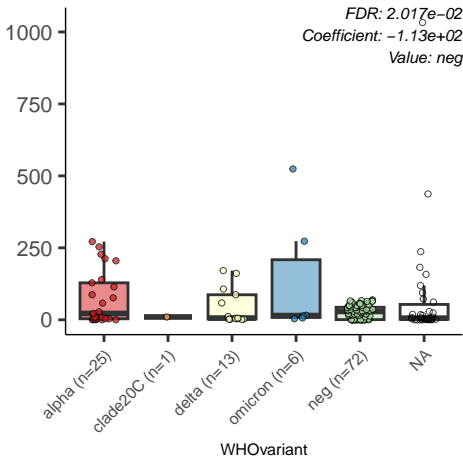

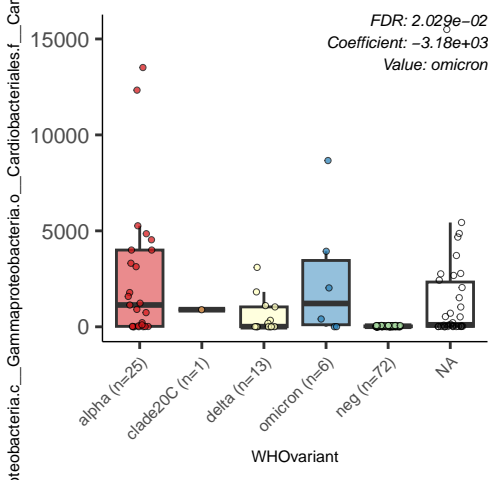

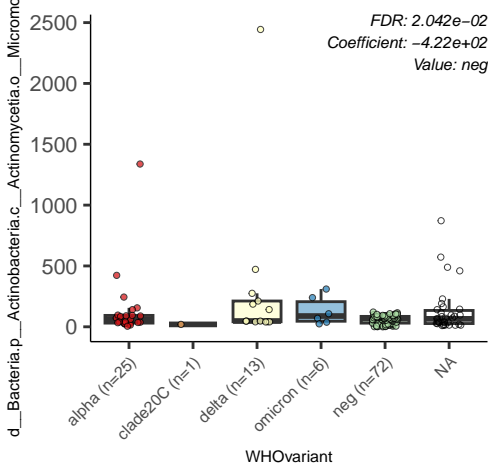

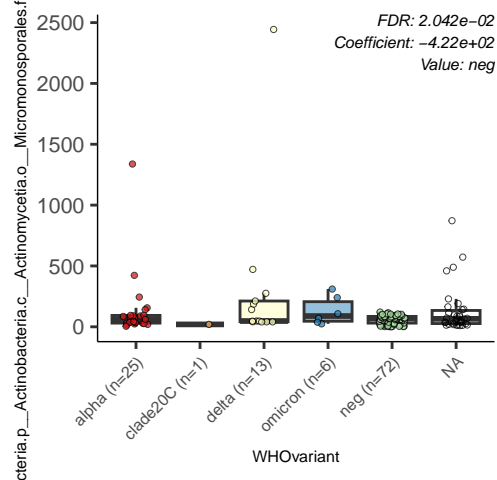

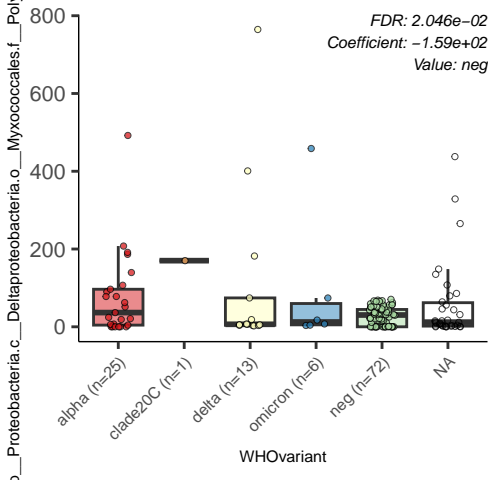

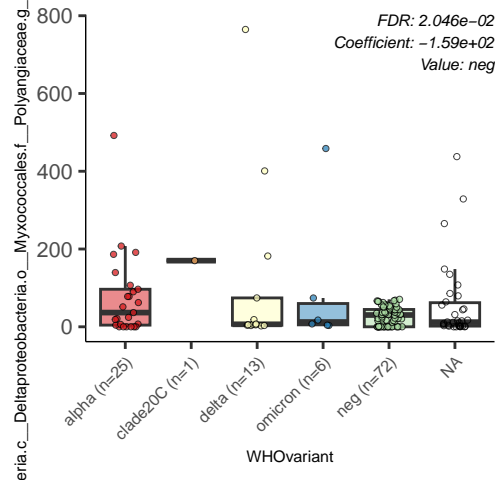

Actinomycetia.o\_\_Corynebacteriales.f\_\_Corynebacteriaceae.g\_\_Co

FDR:  $2.059e-02$   
Coefficient:  $-9.44e+02$   
Value: omicron

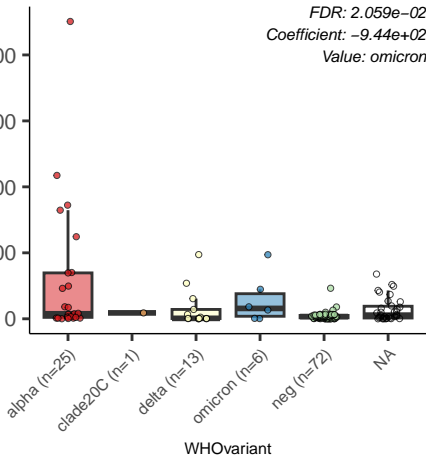



bacteria.p\_Firmicutes.c\_Negativicutes.o\_Veillonellales.f\_Veillonell

FDR: 2.061e-02  
Coefficient: -5.74e+05  
Value: neg

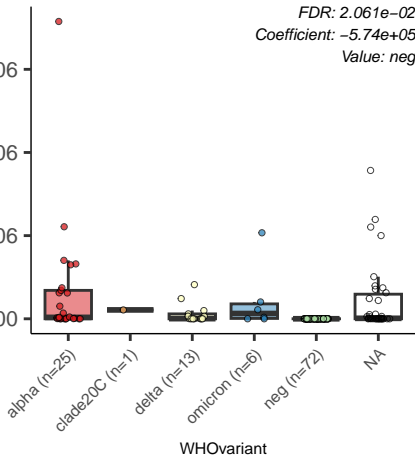

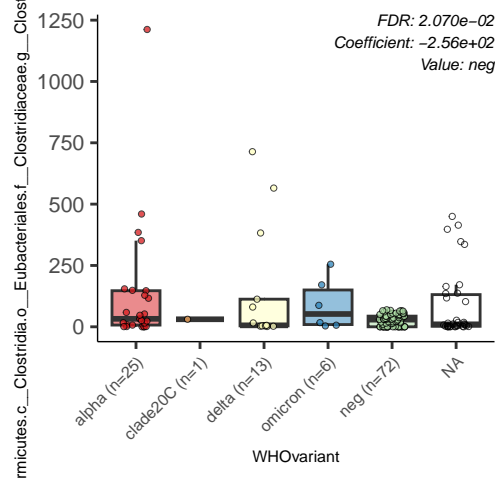

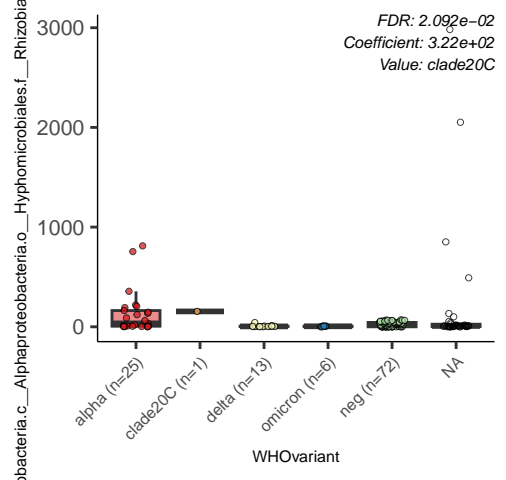

a.p\_\_Proteobacteria.c\_\_Gammaproteobacteria.o\_\_Enterobacterales

FDR:  $2.109 \times 10^{-2}$   
Coefficient:  $6.24 \times 10^2$   
Value: omicron

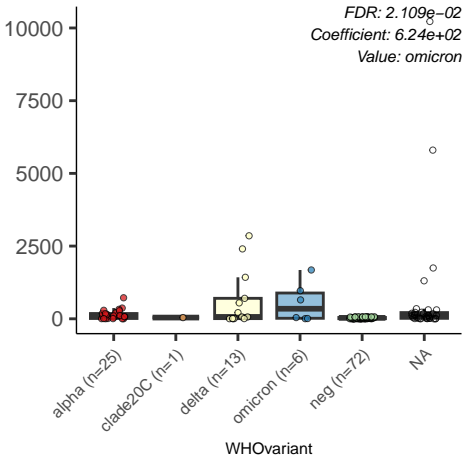

Bacteria.p\_Actinobacteria.c\_Actinomycetia.o\_Corynebacteriales

FDR:  $2.127e-02$   
Coefficient:  $-7.11e+03$   
Value: delta

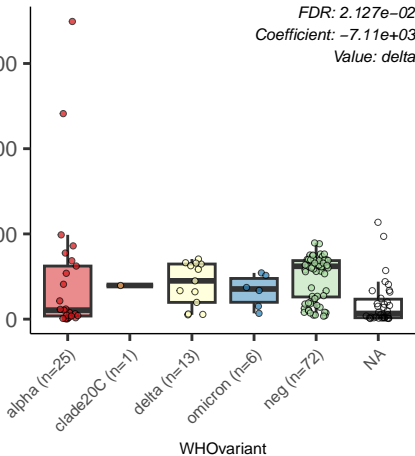

hivites.c\_\_Negativicutes.o\_\_Veillonellales.f\_\_Veillonellaceae.g\_\_Me

*FDR: 2.130e-02*  
*Coefficient: -3.49e+05*  
*Value: neg*

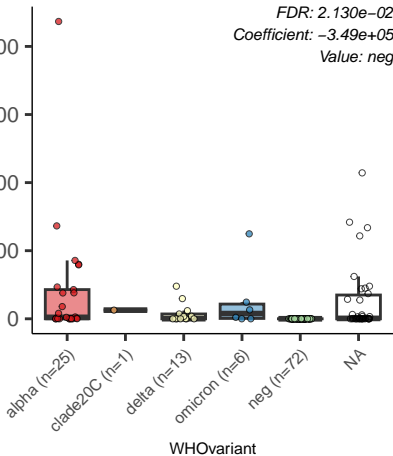

c\_\_Alphaproteobacteria.o\_\_Hyphomicrobiales.f\_\_Nitrobacteraceae.

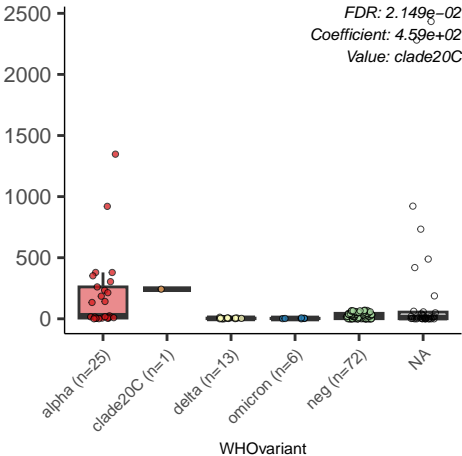

d\_Bacteria.p\_Tenericutes

FDR:  $2.159e-02$   
Coefficient:  $-1.12e+04$   
Value: omicron

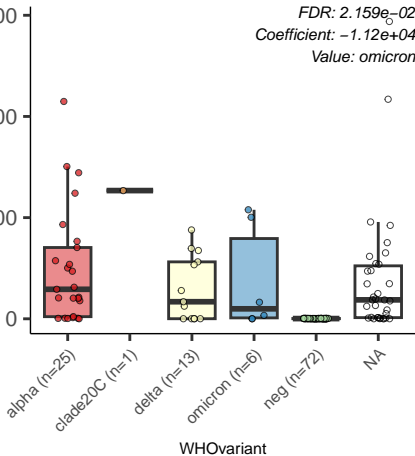



detes.c\_\_Cytophagia.o\_\_Cytophagales.f\_\_Cyclobacteriaceae.g\_\_C

*FDR: 2.160e-02*  
*Coefficient: -2.12e+02*  
*Value: neg*

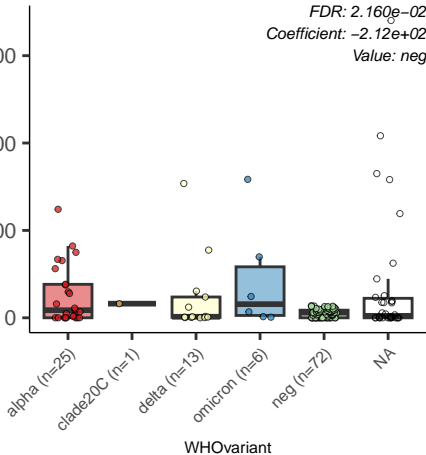

teobacteria.c\_\_Gammaproteobacteria.o\_\_Oceanospirillales.f\_\_Halobacterium

FDR:  $2.162e-02$   
Coefficient:  $-7.84e+01$   
Value: neg

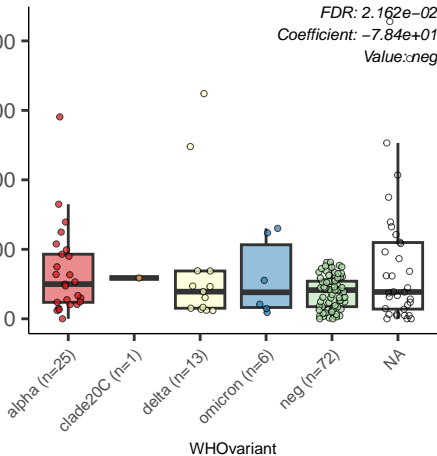

nmmaproteobacteria.o\_\_Oceanospirillales.f\_\_Halomonadaceae.g\_\_C

FDR:  $2.162e-02$   
Coefficient:  $-7.84e+01$   
Value: neg

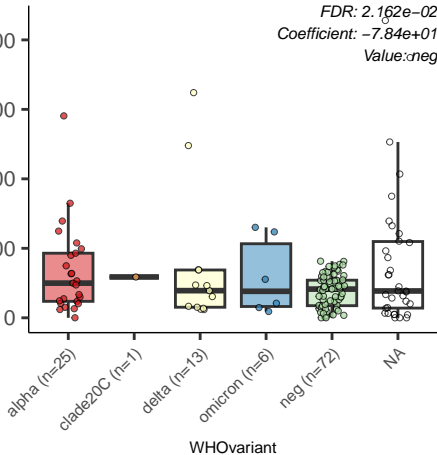

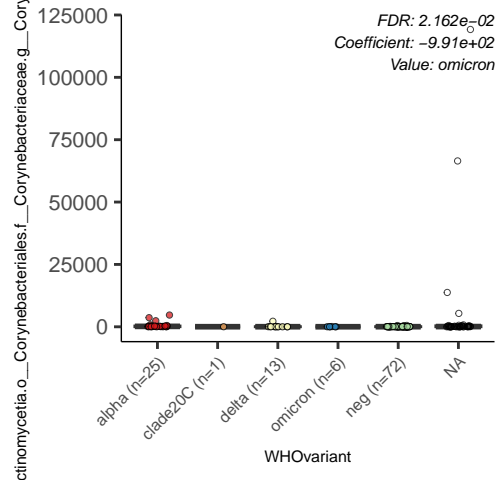

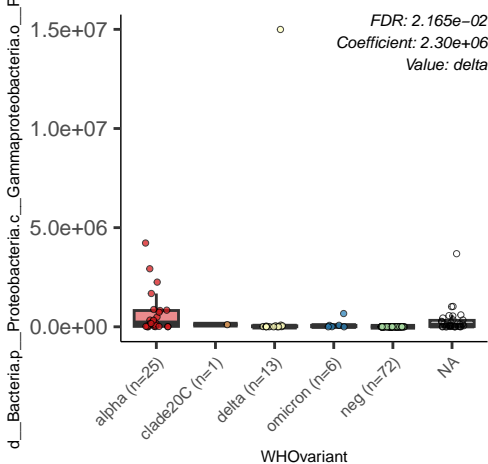

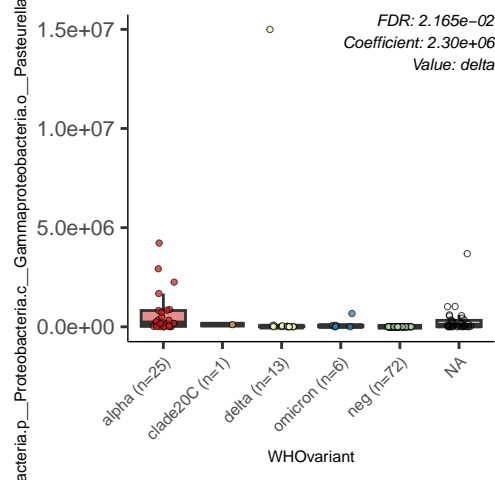

Bacteria.p\_Spirochaetes.c\_Spirochaetia.o\_Spirochaetales.f\_Bo

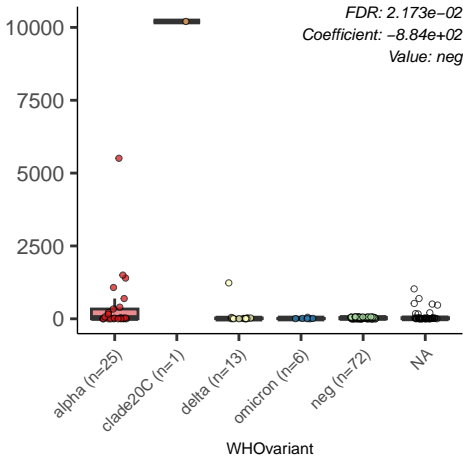

bacteria.p\_\_Planctomycetes.c\_\_Planctomycetia.o\_\_Pirellulales.f\_\_Pi

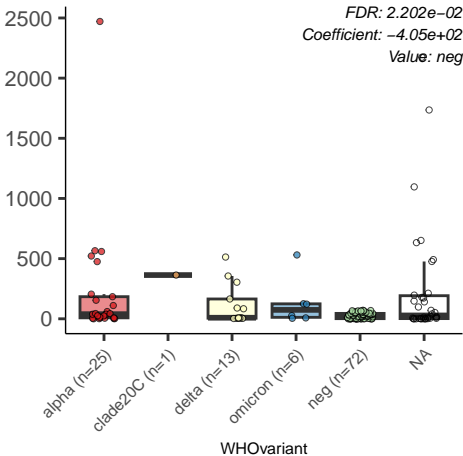



bacteria.p\_\_Firmicutes.c\_\_Tissierellia.o\_\_Tissierellales.f\_\_Peptoniph

FDR: 2.241e-02  
Coefficient: -1.04e+03  
Value: omicron

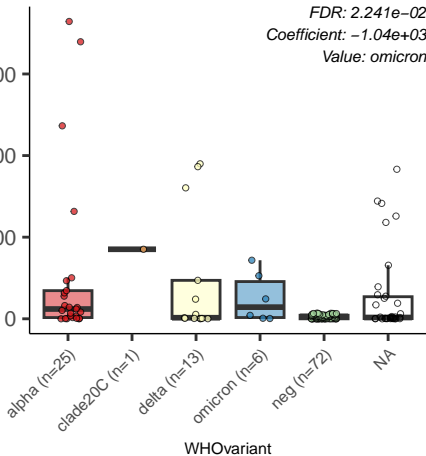

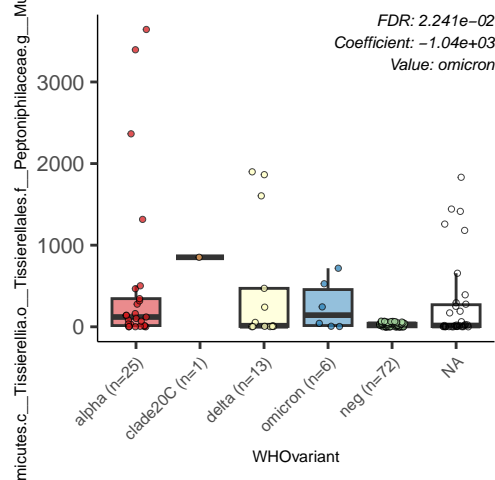

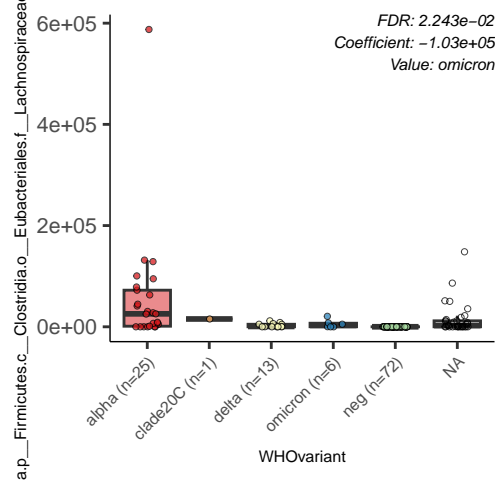

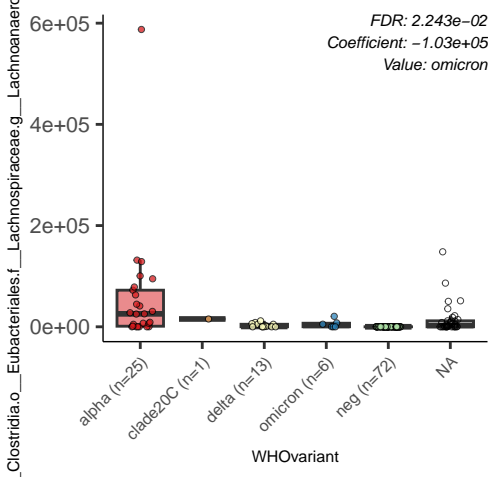

d\_Bacteria.p\_\_Spirochaetes.c\_\_Spirochaetia.o\_\_Spirochaetales

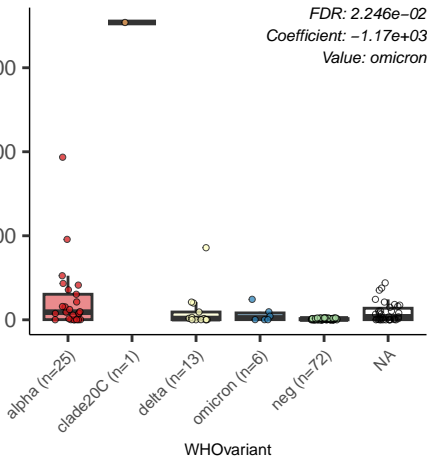

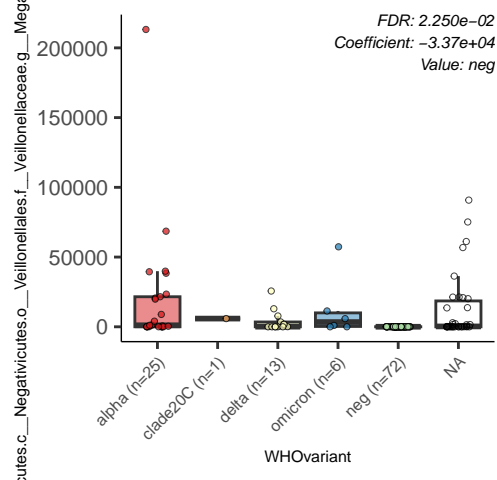

lanctomycetes.c\_\_Planctomycetia.o\_\_Pirellulales.f\_\_Pirellulaceae.g

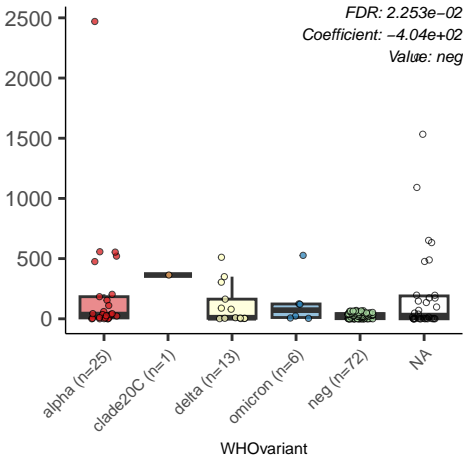

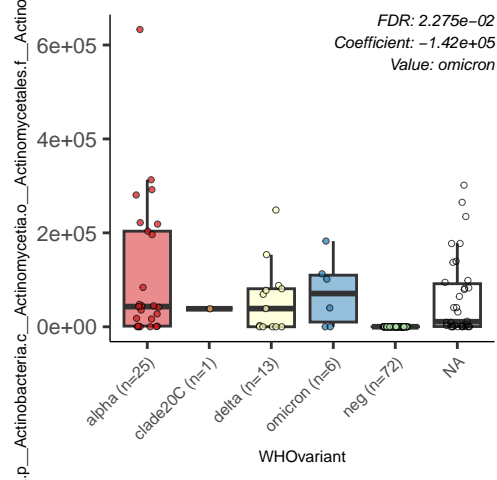



Firmicutes.c\_\_Clostridia.o\_\_Thermoanaerobacterales.f\_\_Thermo

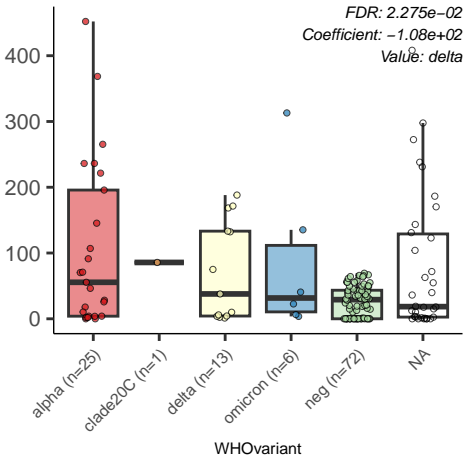

irria.p\_\_Proteobacteria.c\_\_Gammaproteobacteria.o\_\_Enterobactera

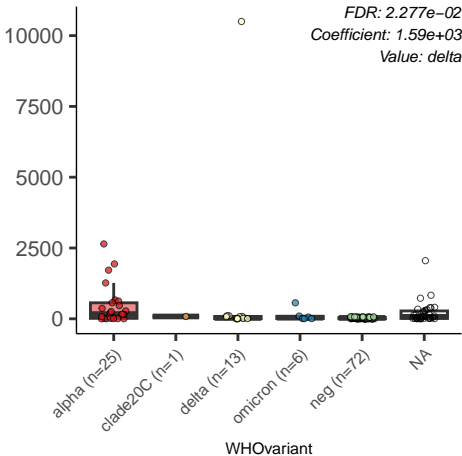

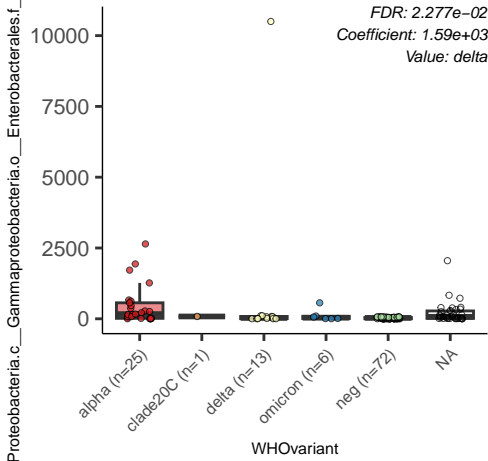

d\_Bacteria.p\_Bacteroidetes.c\_Chitinophagia

FDR:  $2.279e-02$   
Coefficient:  $-9.17e+02$   
Value: delta

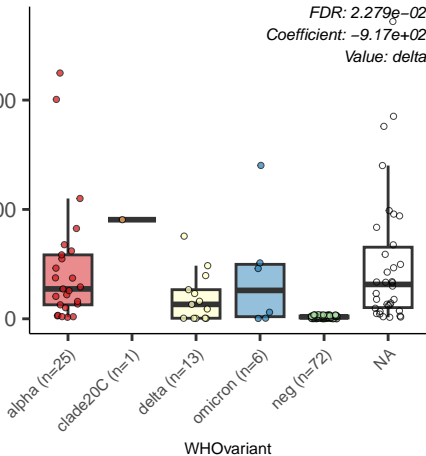

d\_Bacteria.p\_Bacteroidetes.c\_\_Chitinophagia.o\_\_Chitin

FDR:  $2.279 \times 10^{-2}$   
Coefficient:  $-9.17 \times 10^2$   
Value: delta

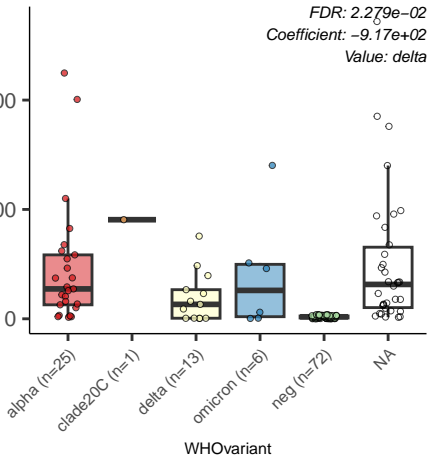

\_Bacteria.p\_\_Bacteroidetes.c\_\_Chitinophagia.o\_\_Chitinophagales.f

FDR:  $2.279 \times 10^{-2}$   
Coefficient:  $-9.17 \times 10^2$   
Value: delta

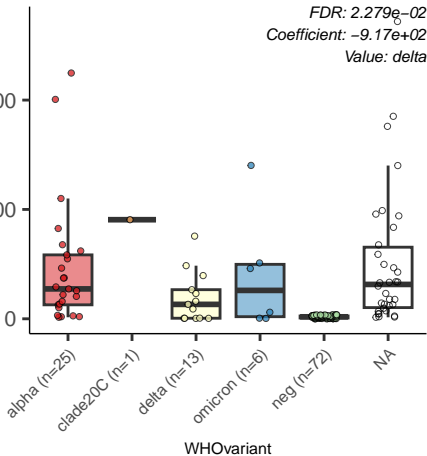

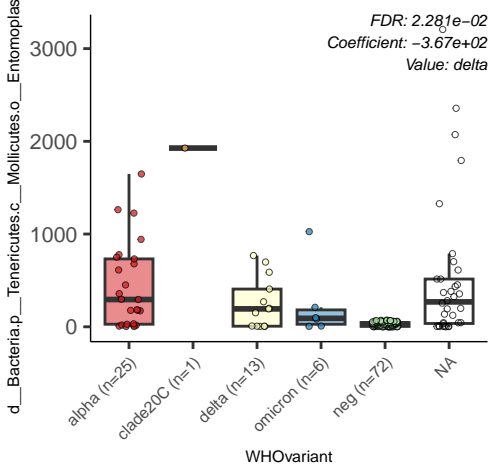

d\_Bacteria.p\_Bacteroidetes.c\_Bacteroidia.o\_Marinifilum

FDR:  $2.302 \times 10^{-2}$   
Coefficient:  $-4.79 \times 10^2$   
Value: delta

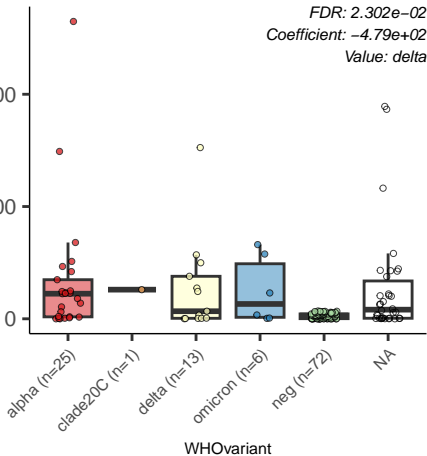



tinobacteria.c\_\_Actinomycetia.o\_\_Micrococcales.f\_\_Micrococcaceae

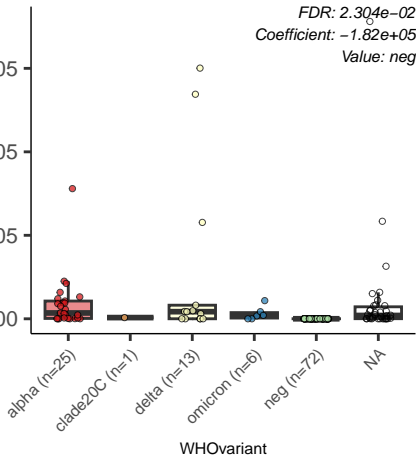

d\_Bacteria.p\_\_Spirochaetes

FDR:  $2.323e-02$   
Coefficient:  $-3.57e+04$   
Value: neg

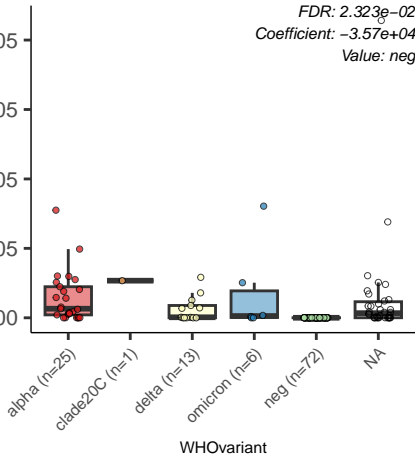

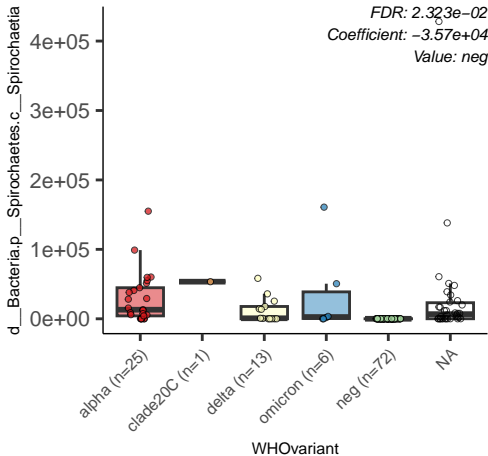

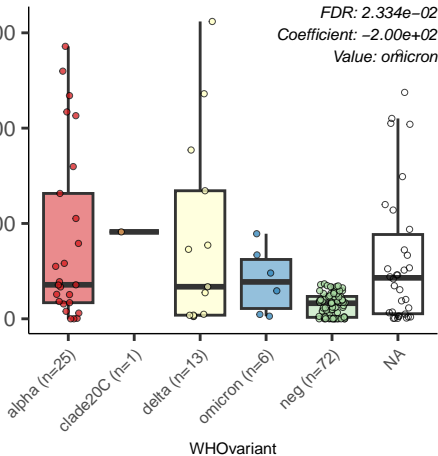

terial.p\_\_Bacteroidetes.c\_\_Bacteroidia.o\_\_Marinilabiales.f\_\_Marinil

FDR:  $2.358e-02$   
Coefficient:  $-1.44e+02$   
Value: omicron

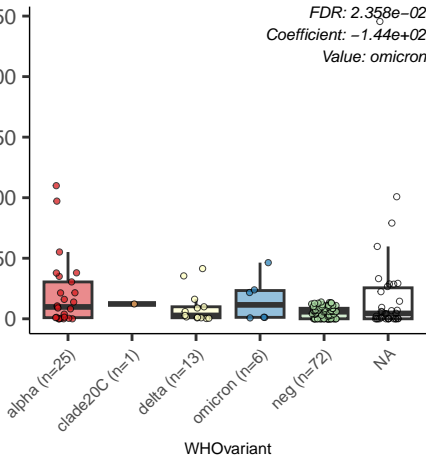

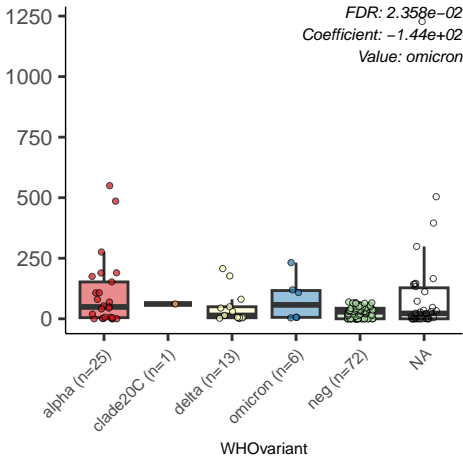

Gamma\_\_Gammaproteobacteria.o\_\_Enterobacterales.f\_\_Bruguierivoracace

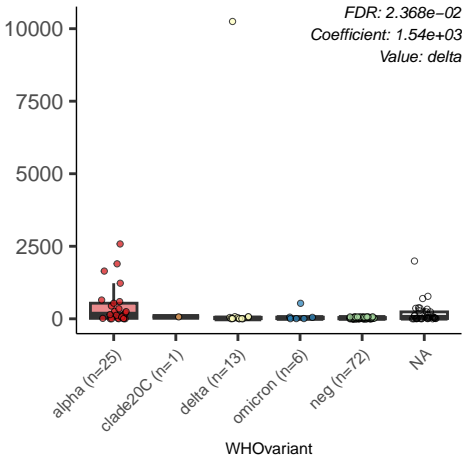

d\_Bacteria.p\_\_Proteobacteria.c\_\_Gammaproteobacteria.o\_\_Ca

FDR:  $2.400e-02$   
Coefficient:  $-3.38e+03$   
Value: omicron

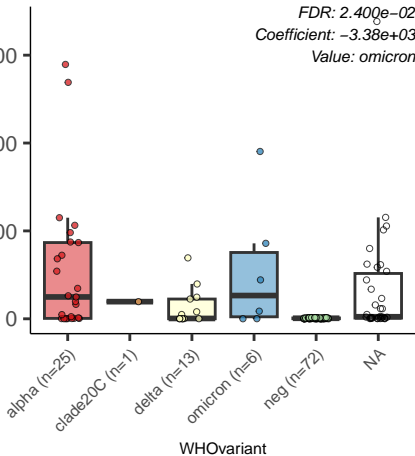



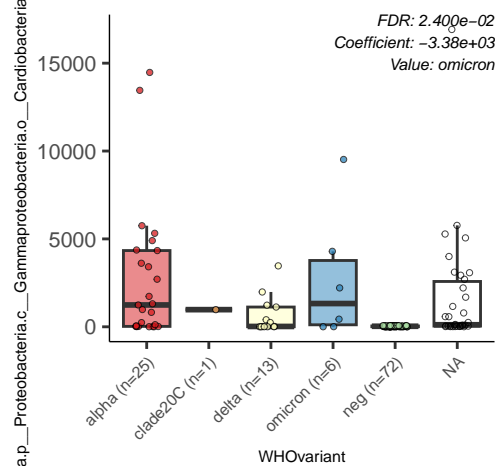

ria.p\_Actinobacteria.c\_Actinomycetia.o\_Micrococcales.f\_Micro

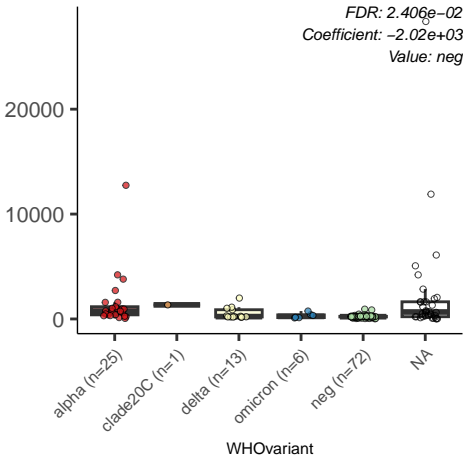

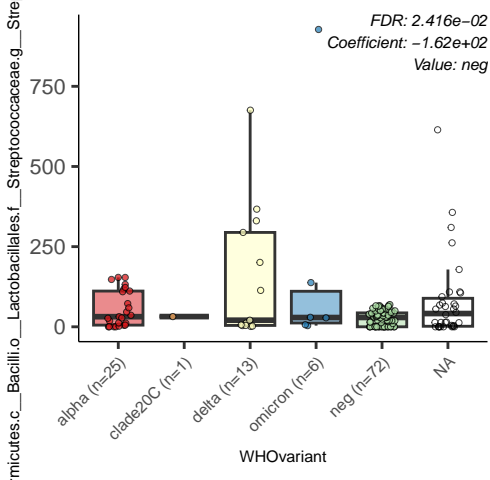

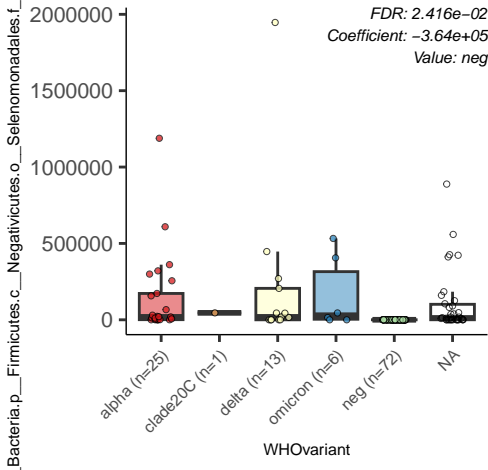

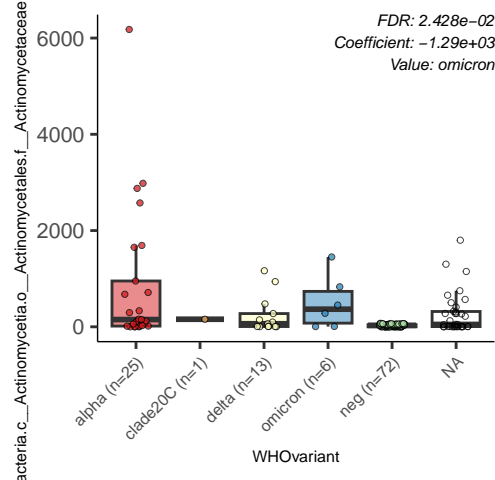

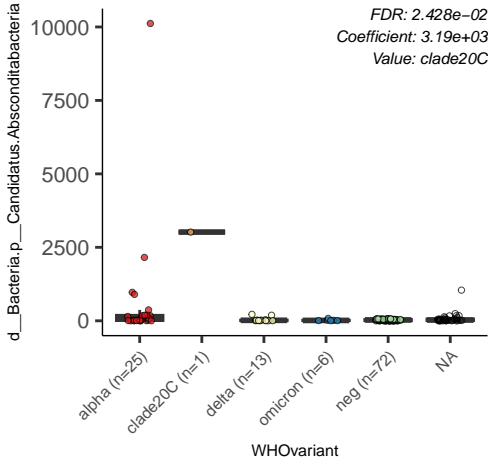

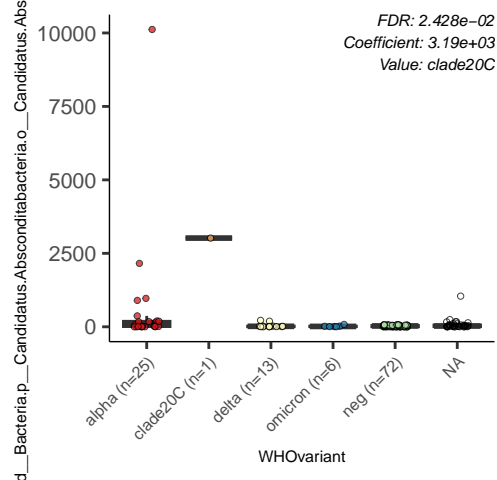

candidatus.Absconditabacteria.o\_\_Candidatus.Absconditabacterales.

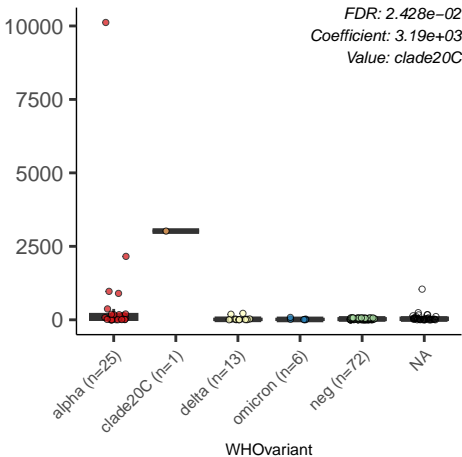



nditabacteria.o\_\_Candidatus.Absconditabacterales.f\_\_Candidatus.A

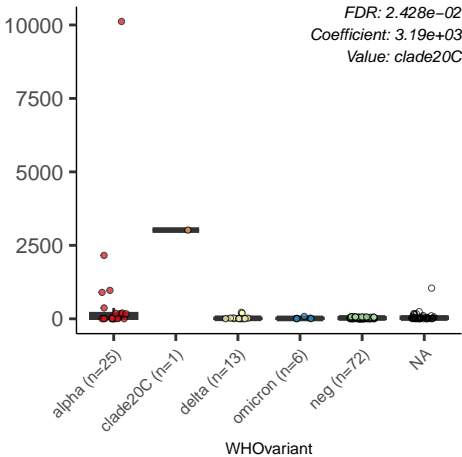

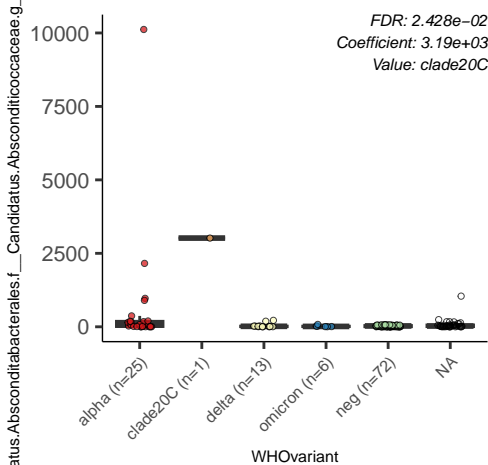

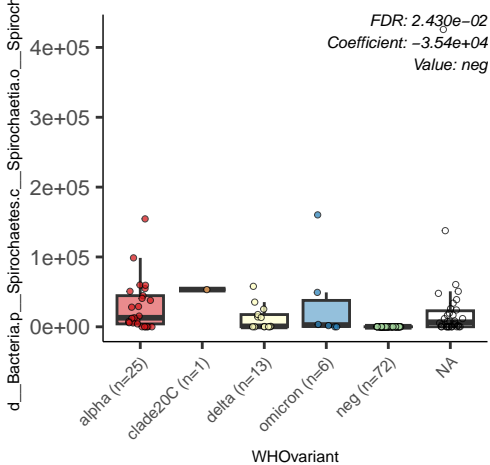

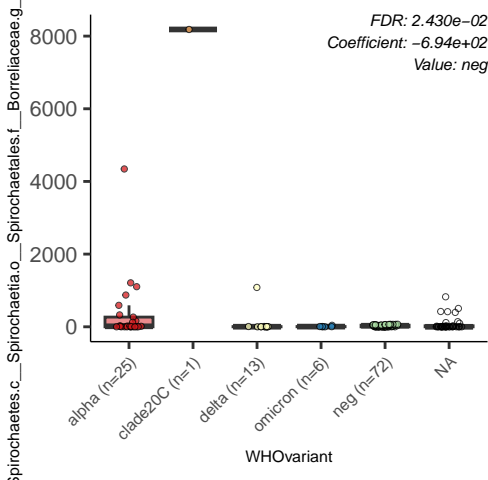

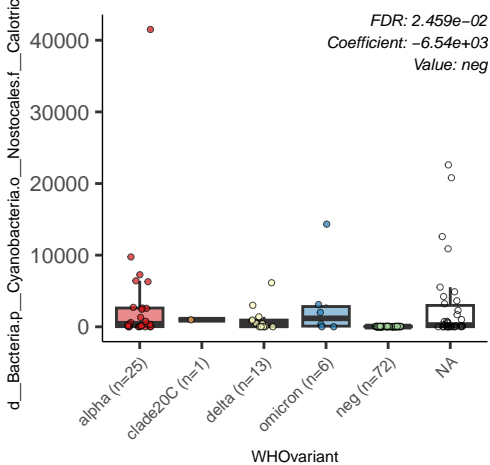

d\_\_Bacteria.p\_\_Cyanobacteria.o\_\_Nostocales.f\_\_Calotrichaceae

FDR:  $2.459e-02$   
Coefficient:  $-6.54e+03$   
Value: neg

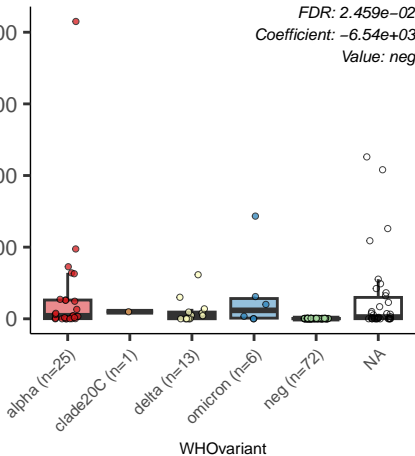

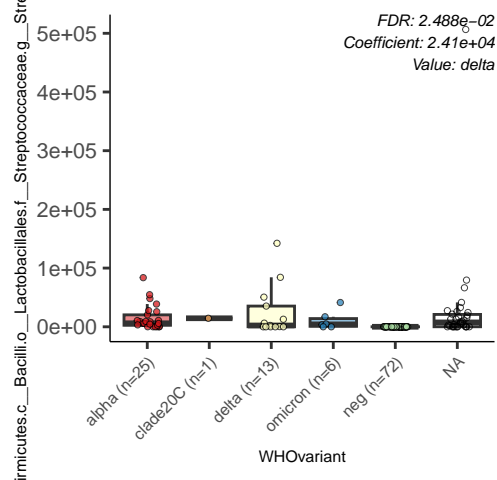

Negativicutes.o\_\_Acidaminococcales.f\_\_Acidaminococcaceae.g

FDR:  $2.492e-02$   
Coefficient:  $-3.47e+02$   
Value: omicron

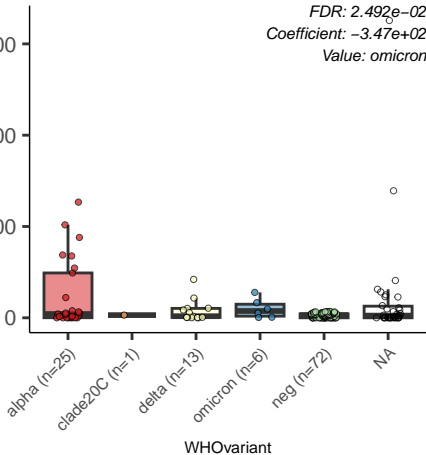



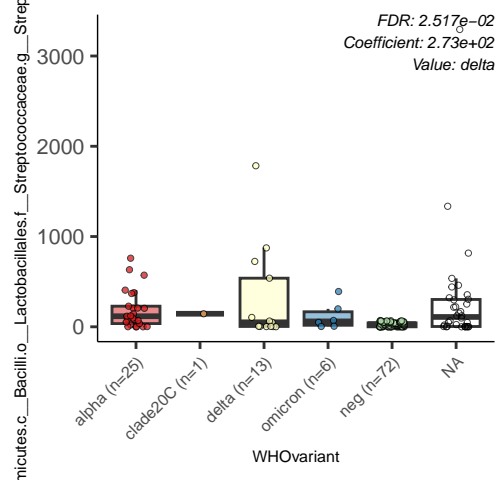

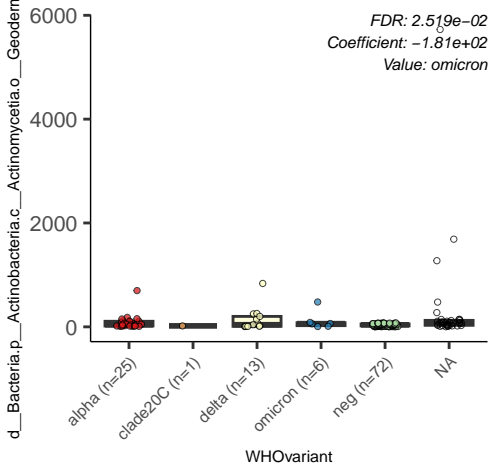

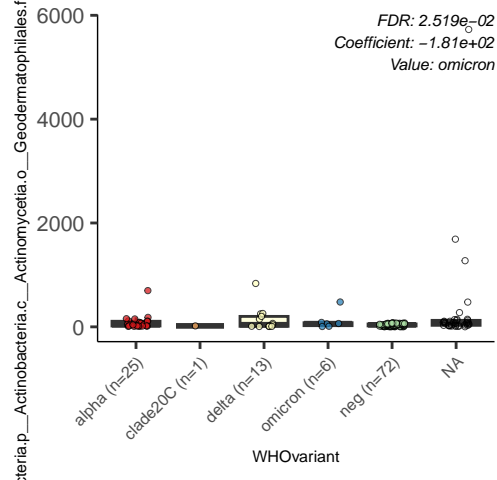

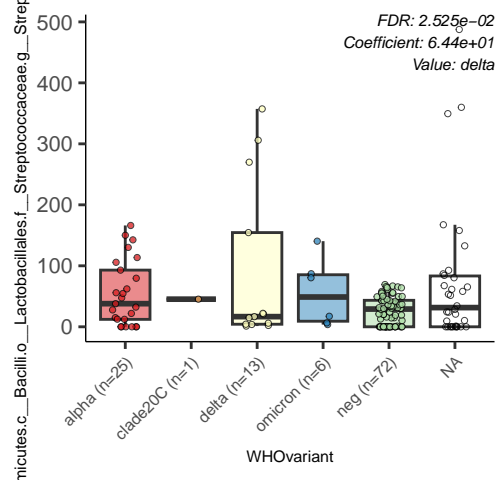

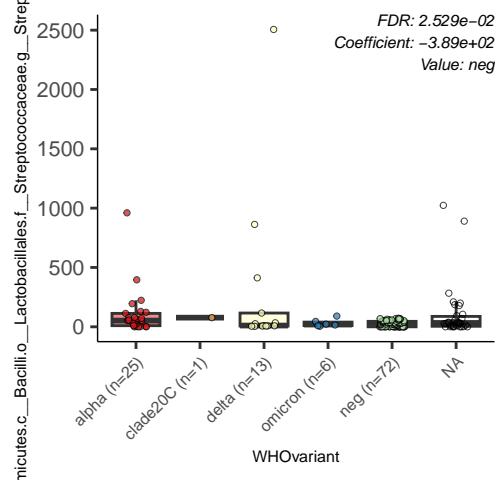

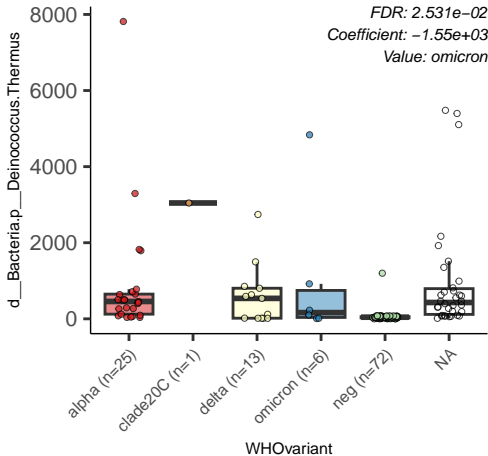

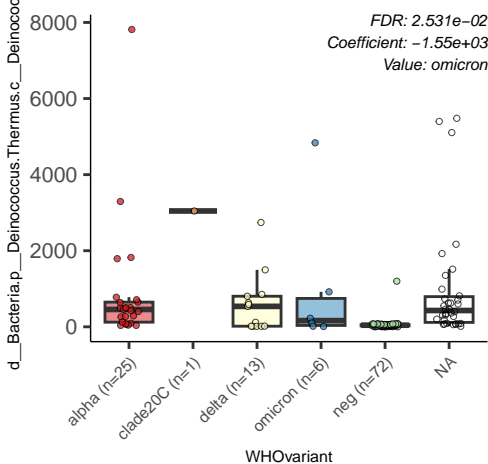

o\_\_Proteobacteria.c\_\_Betaproteobacteria.o\_\_Burkholderiales.f\_\_Bu

FDR:  $2.575e-02$   
Coefficient:  $-2.77e+02$   
Value: omicron

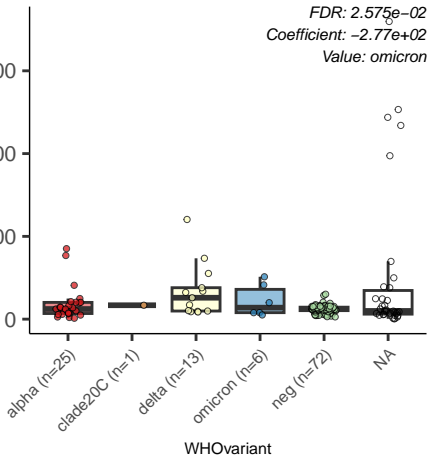



bacteria.c\_Actinomycetia.o\_Micrococcales.f\_Microbacteriaceae.g

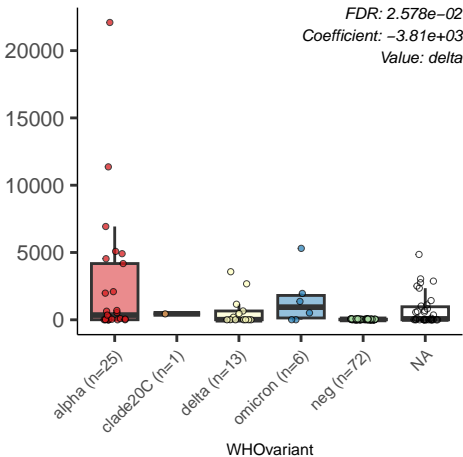

ia.p\_Actinobacteria.c\_Actinomycetia.o\_Micrococcales.f\_Microb

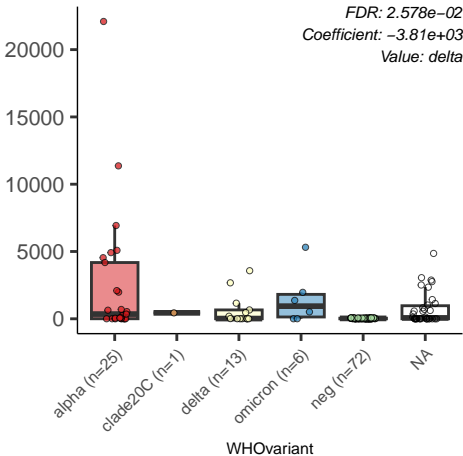

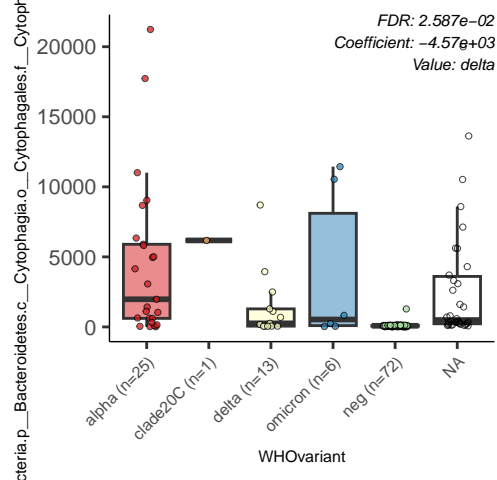

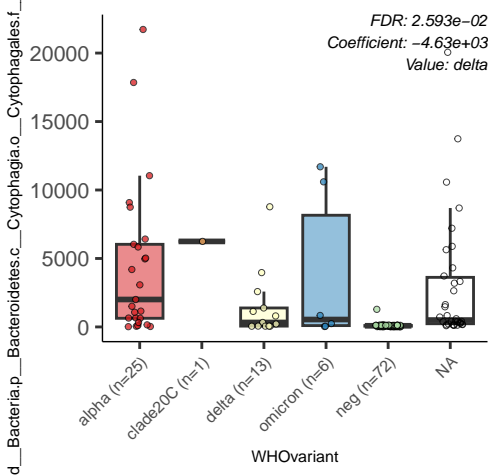

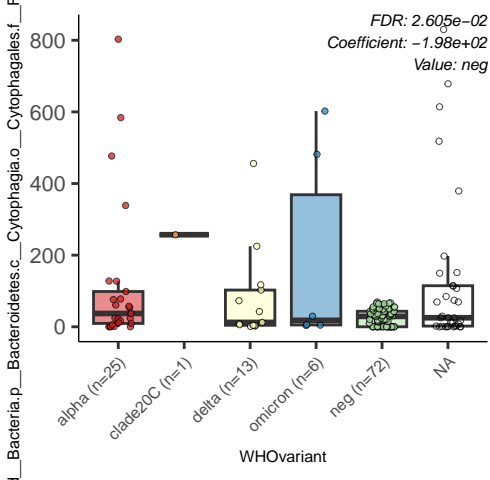

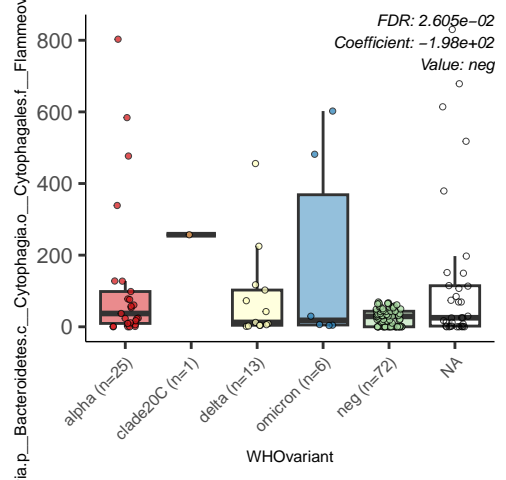

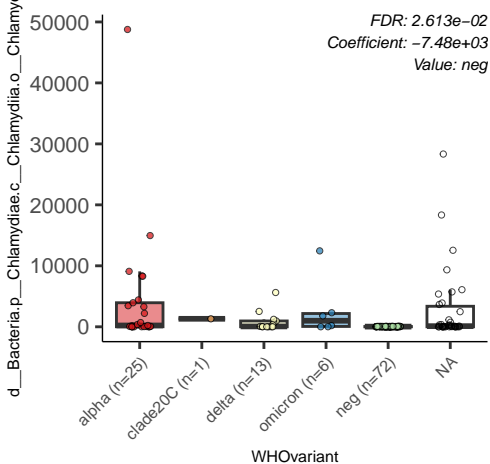

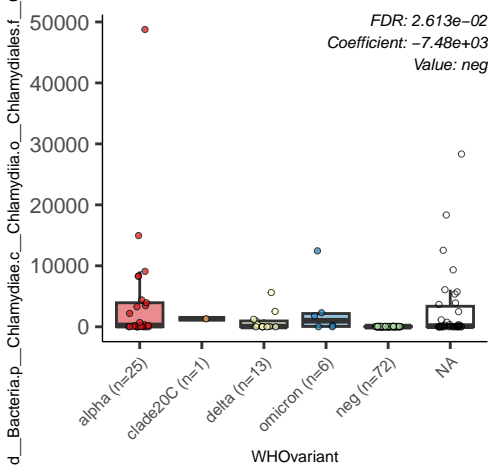



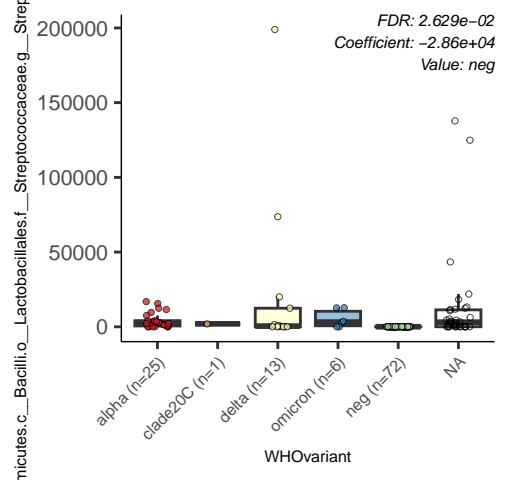

s.c.\_Bacilli.o\_Lactobacillales.f\_\_Streptococcaceae.g\_\_Streptococ

FDR: 2.629e-02  
Coefficient: 1.48e+03  
Value: delta

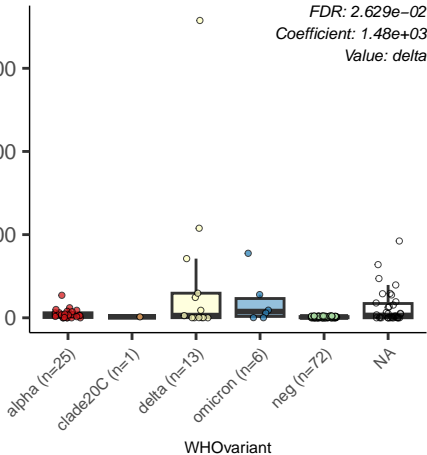

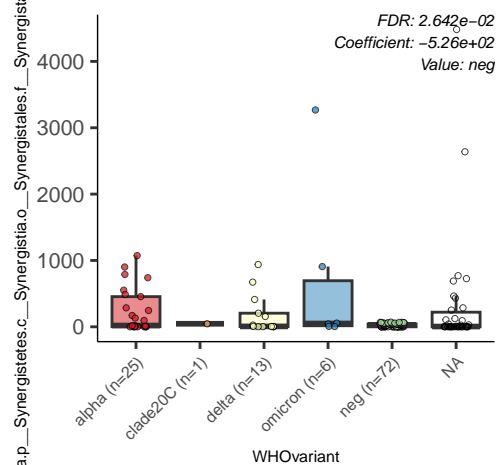

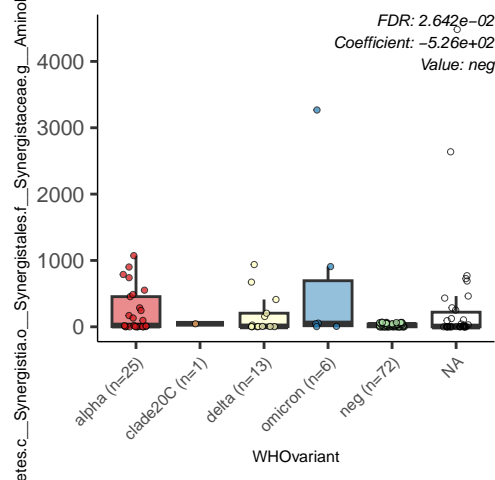

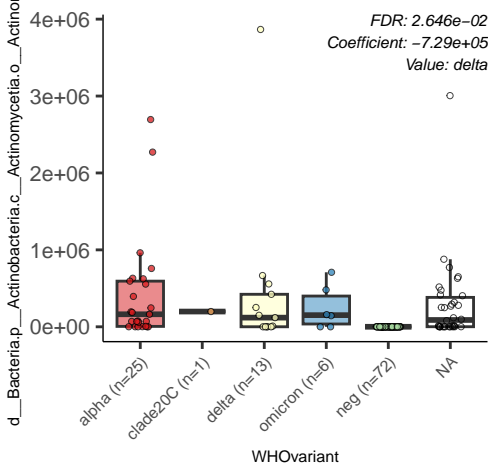

Bacteria.p\_Actinobacteria.c\_Actinomycetia.o\_Actinomycetales.f

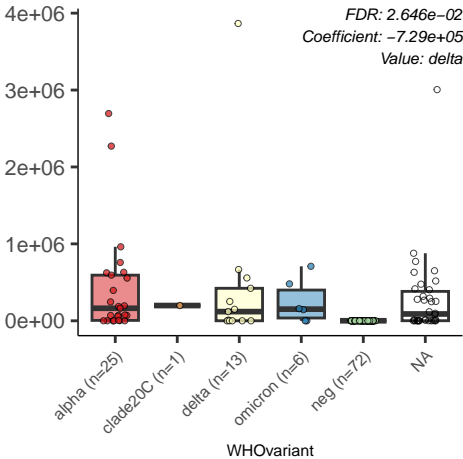

s.c.\_Bacilli.o\_Lactobacillales.f\_\_Streptococcaceae.g\_\_Streptococ

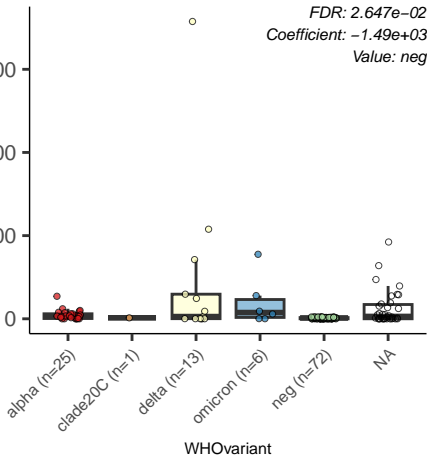

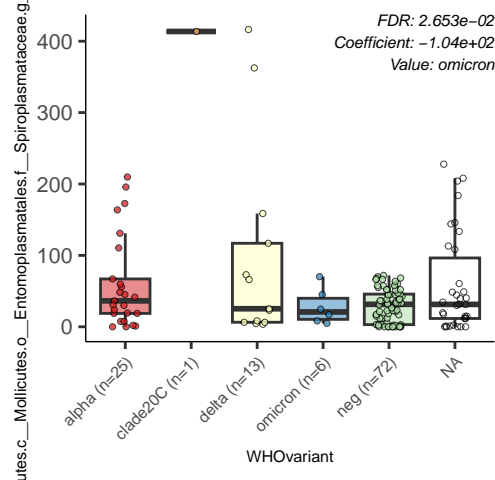



a.p.\_Bacteroidetes.c\_Flavobacteriia.o\_Flavobacteriales.f\_Week

FDR: 2.676e-02  
Coefficient: -1.45e+03  
Values: delta

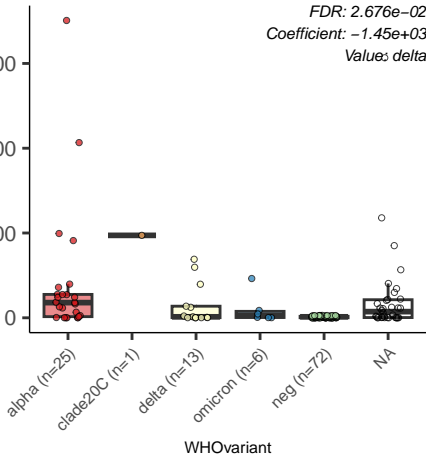

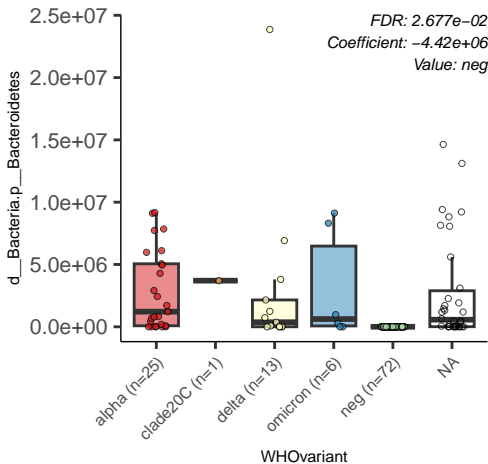

FDR:  $2.703e-02$   
Coefficient:  $-1.41e+03$   
Value: omicron

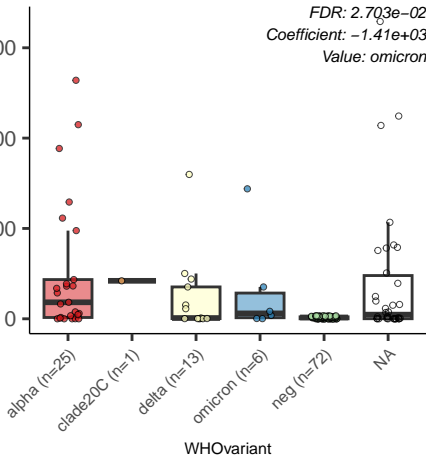

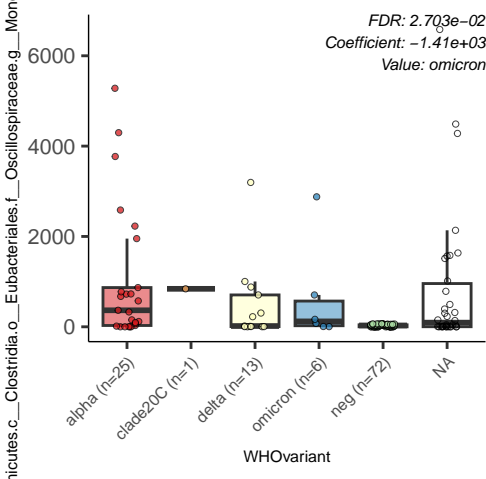

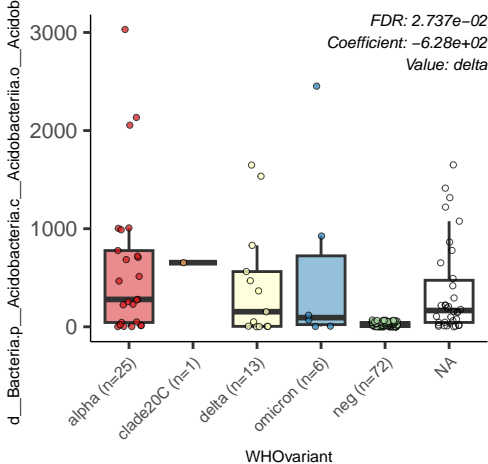

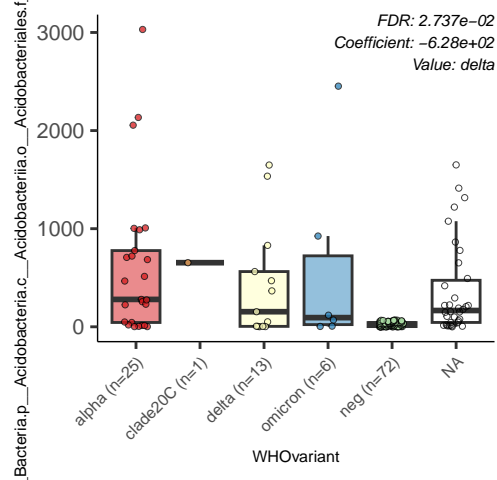

nicutes.c\_\_Bacilli.o\_\_Lactobacillales.f\_\_Lactobacillaceae.g\_\_Lactob

FDR: 2.761e-02  
Coefficient: -2.20e+02  
Value: neg

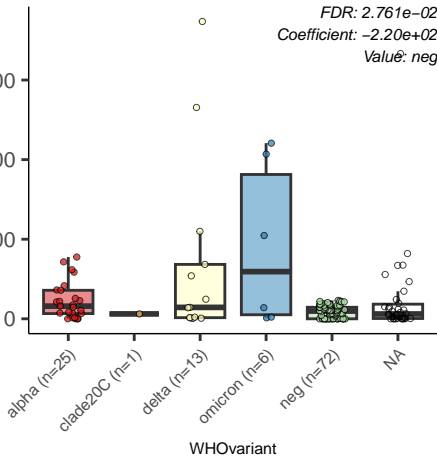

d\_\_Bacteria.p\_\_Gemmatimonadetes

FDR:  $2.769e-02$   
Coefficient:  $-2.68e+02$   
Value: delta

1000

500

0

alpha (n=25)

clade20C (n=1)

delta (n=13)

omicron (n=6)

neg (n=72)

NA

WHOvariant

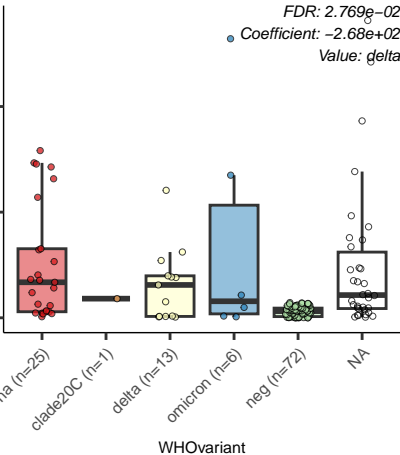



d\_\_Bacteria.p\_\_Gemmatimonadetes.c\_\_Gemmatimonada

FDR:  $2.769 \times 10^{-2}$   
Coefficient:  $-2.68 \times 10^2$   
Value: delta

1000  
500  
0

alpha (n=25)

clade20C (n=1)

delta (n=13)

omicron (n=6)

neg (n=72)

NA

WHOvariant

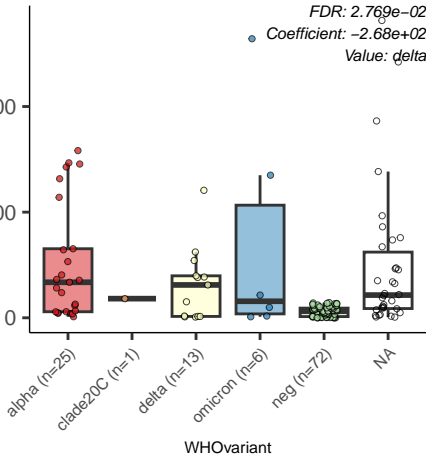

d\_Bacteria.p\_Gemmatimonadetes.c\_Gemmatimonadetes.o\_Ge

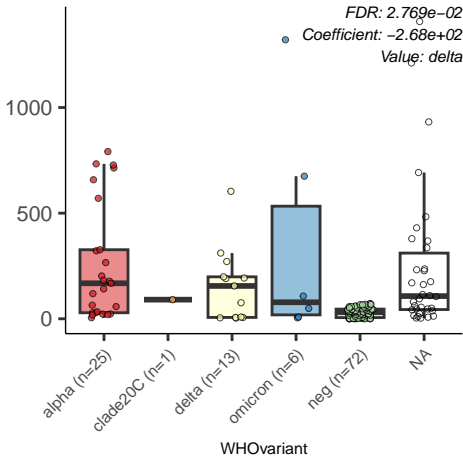

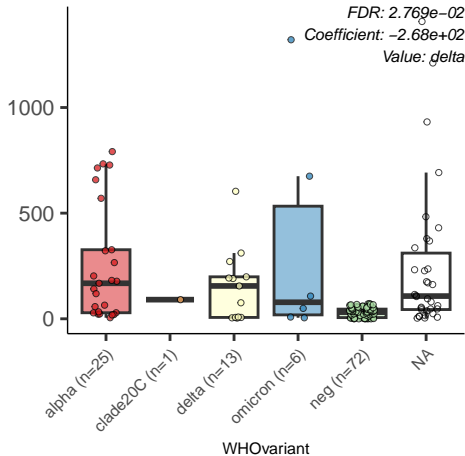

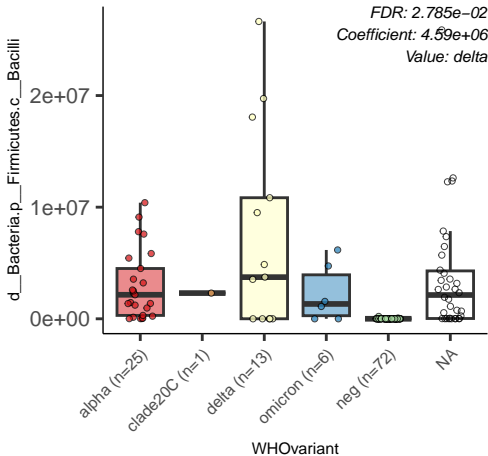

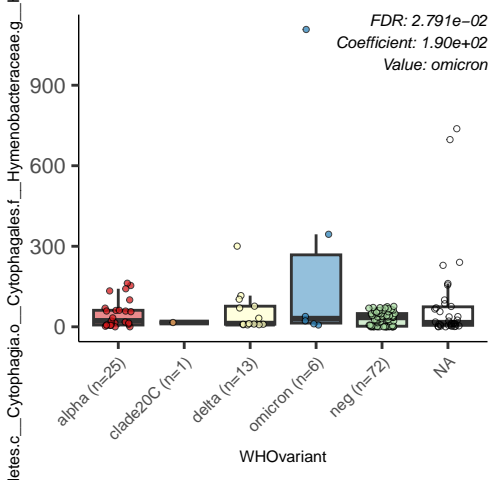

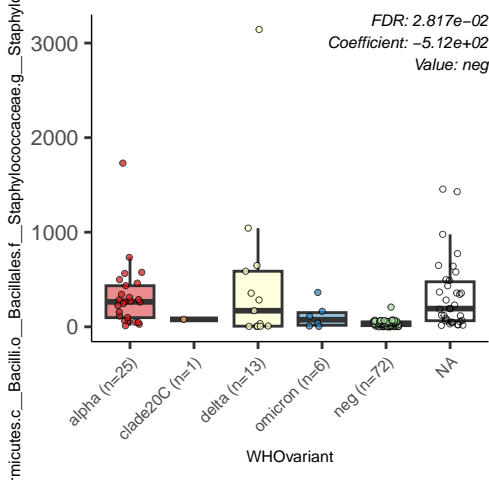

eria.p\_\_Proteobacteria.c\_\_Epsilonproteobacteria.o\_\_Campylobacter

FDR:  $2.823e-02$   
Coefficient:  $-8.16e+02$   
Value: omicron

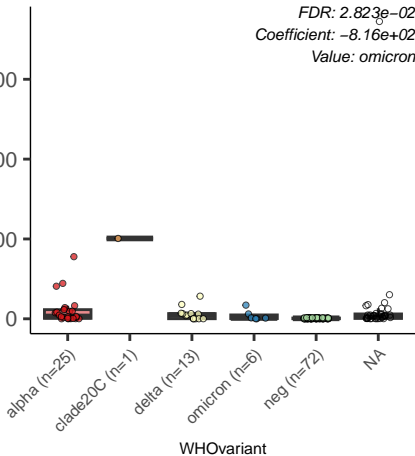

l.p\_\_Firmicutes.c\_\_Erysipelotrichia.o\_\_Erysipelotrichales.f\_\_Erysipe

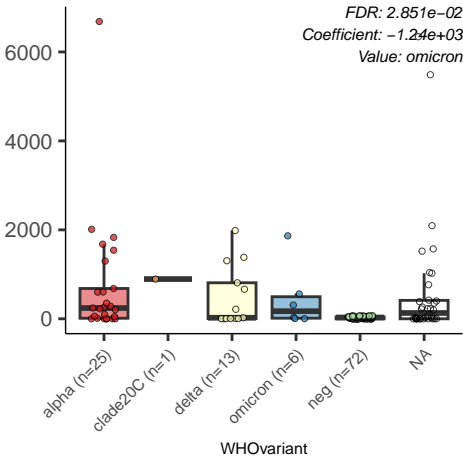



s.c.\_Erysipelotrichia.o\_\_Erysipelotrichales.f\_\_Erysipelotrichaceae.g

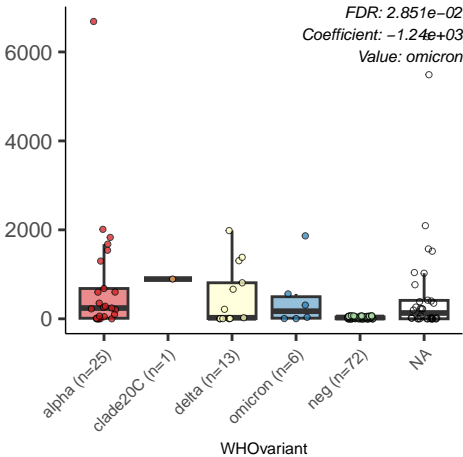

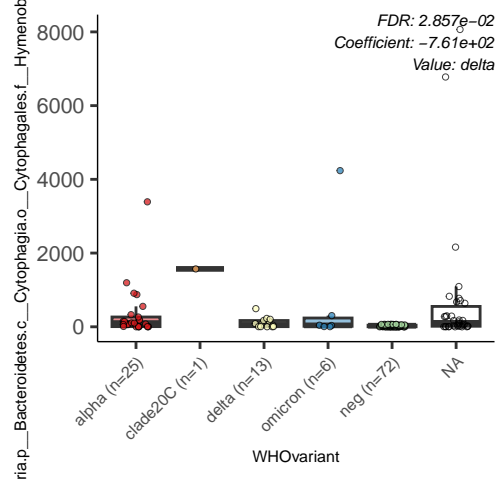

proidetes.c\_Bacteroidia.o\_Bacteroidales.f\_Muribaculaceae.g\_M

*FDR: 2.859e-02*  
*Coefficient: -3.94e+02*  
*Value: neg*

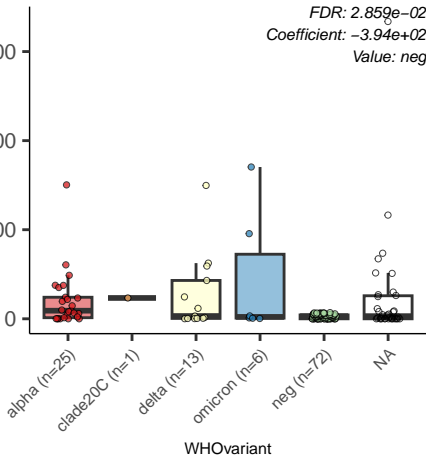

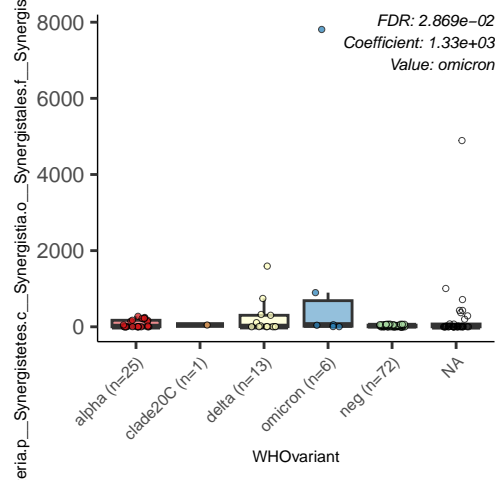

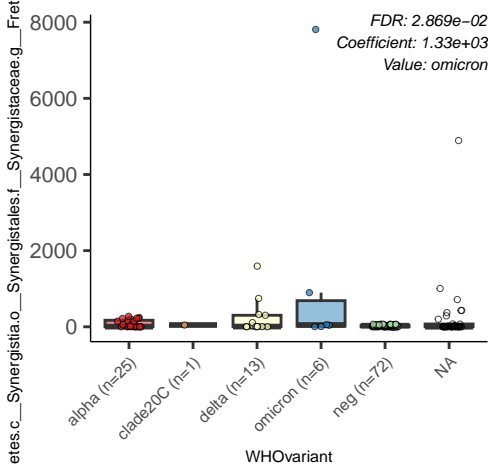

Bacteria.p\_Actinobacteria.c\_Actinomycetia.o\_Corynebacteriales

FDR:  $2.871e-02$   
Coefficient:  $-6.88e+03$   
Value: neg

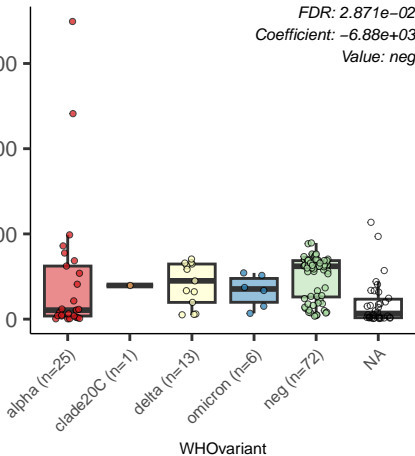

d\_Bacteria.p\_Bacteroidetes.c\_Bacteroidia.o\_Bacteroidales.f\_P

FDR:  $2.877\text{e-}02$   
Coefficient:  $-6.95\text{e}+02$   
Value: omicron

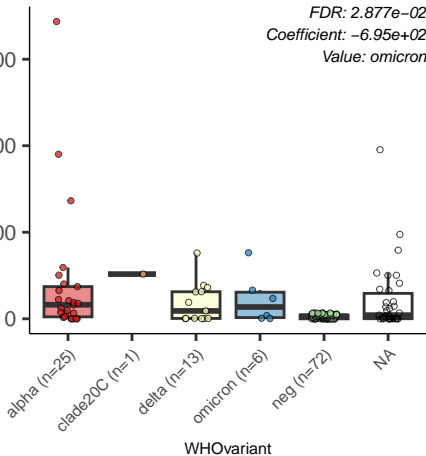





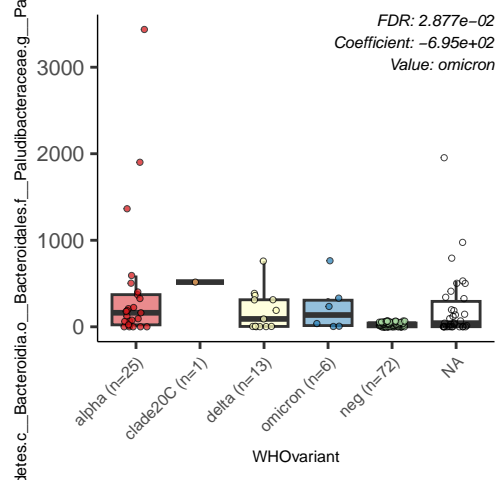

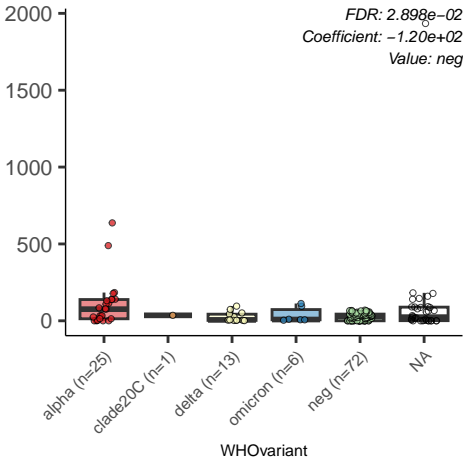

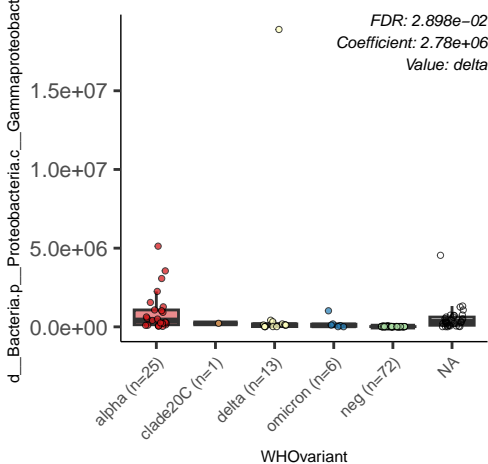

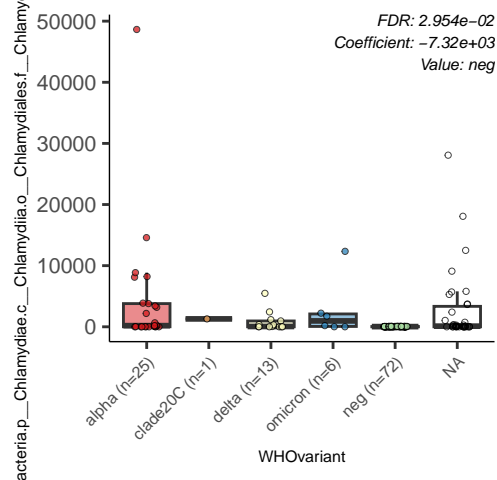

Bacteria.p\_Firmicutes.c\_Clostridia.o\_Eubacteriales.f\_Lachnosp

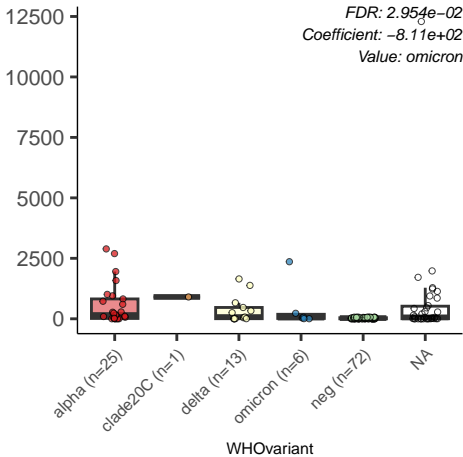

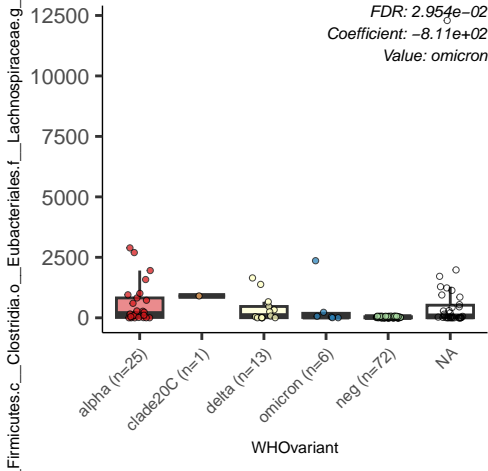

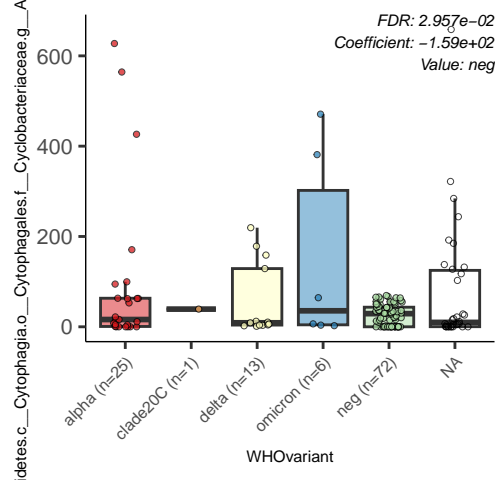

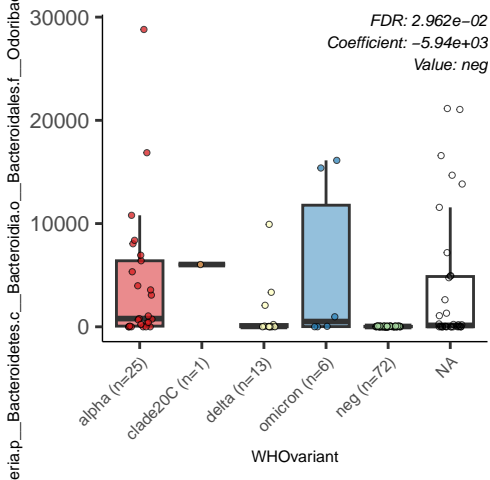



oidetes.c\_\_Bacteroidia.o\_\_Bacteroidales.f\_\_Odoribacteraceae.g\_\_C

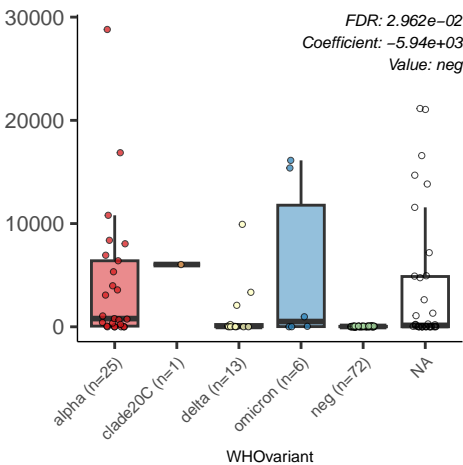

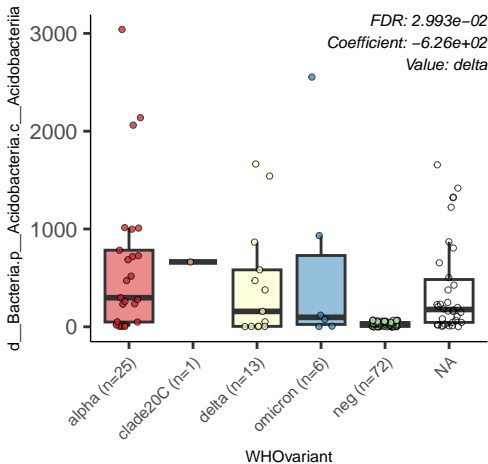

eria.p\_Bacteroidetes.c\_Flavobacteriia.o\_Flavobacteriales.f\_We

FDR:  $3.032e-02$   
Coefficient:  $-2.28e+03$   
Value: delta

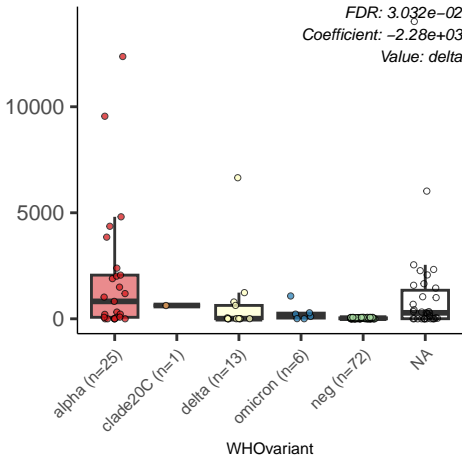

eroidetes.c\_\_Flavobacteriia.o\_\_Flavobacteriales.f\_\_Weeksellaceae

FDR:  $3.032e-02$   
Coefficient:  $-2.28e+03$   
Value: delta

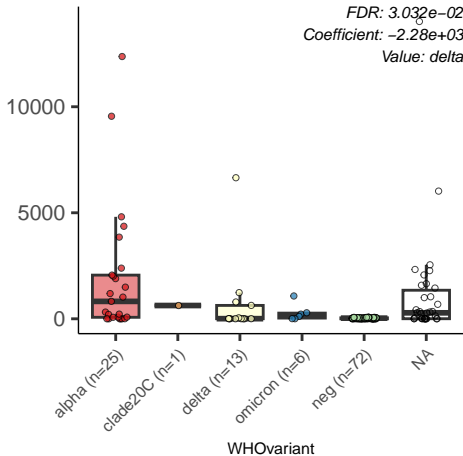

Chlamydiae.c\_\_Chlamydia.o\_\_Chlamydiales.f\_\_Chlamydiaceae.g

FDR:  $3.060e-02$   
Coefficient:  $-6.81e+03$   
Value: neg

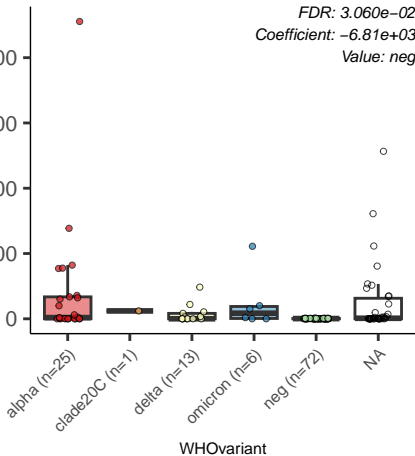

u\_Bacteroidetes.c\_\_Cytophagia.o\_\_Cytophagales.f\_\_Amoebobophila

FDR:  $3.063e-02$   
Coefficient:  $-1.22e+02$   
Value: neg

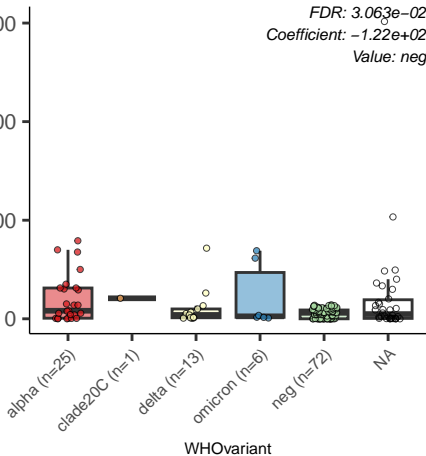

FDR:  $3.082e-02$   
Coefficient:  $-1.16e+02$   
Value: delta

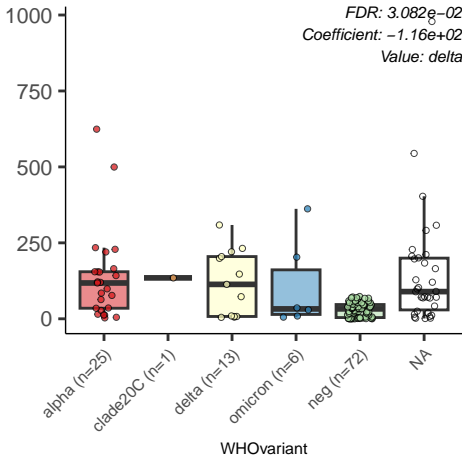

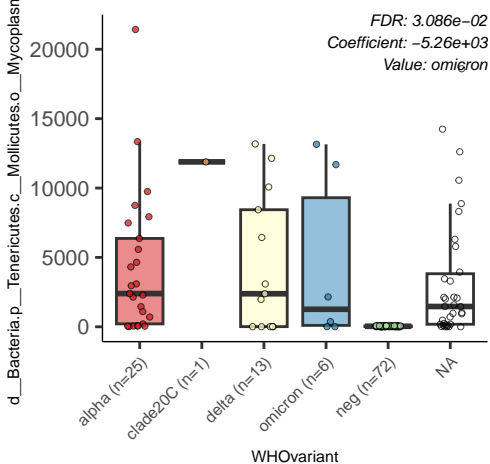



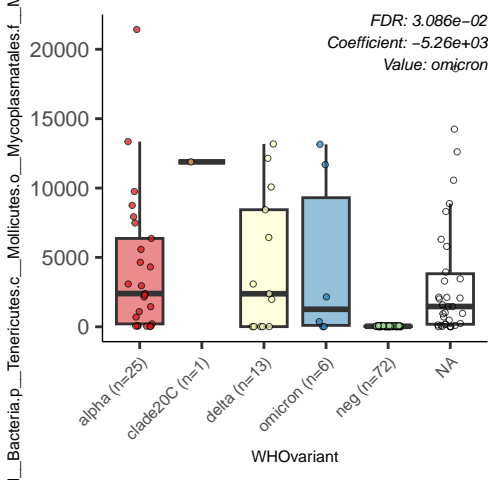

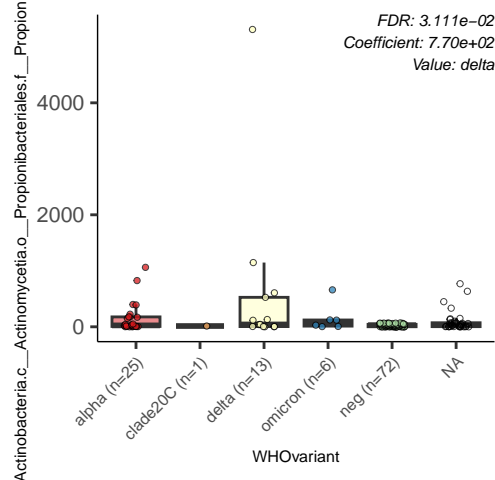

FDR:  $3.111\text{e-}02$   
Coefficient:  $7.70\text{e+}02$   
Value: delta

4000

2000

0

alpha (n=25)

clade20C (n=1)

delta (n=13)

omicron (n=6)

neg (n=72)

NA

WHOvariant

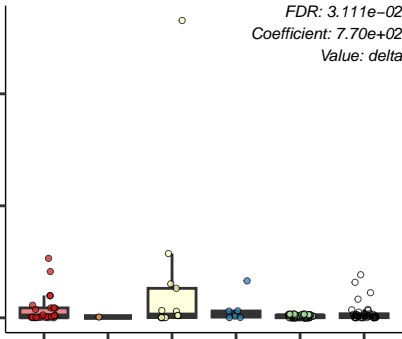

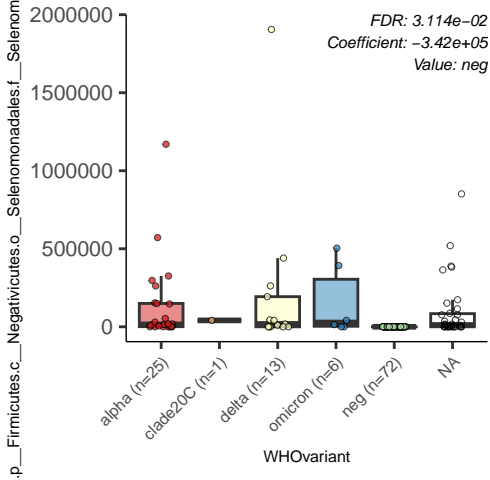

ria.c\_Fusobacteriia.o\_Fusobacteriales.f\_Leptotrichiaceae.g\_Le

*FDR: 3.122e-02*  
*Coefficient: -4.21e+04*  
*Value: delta*

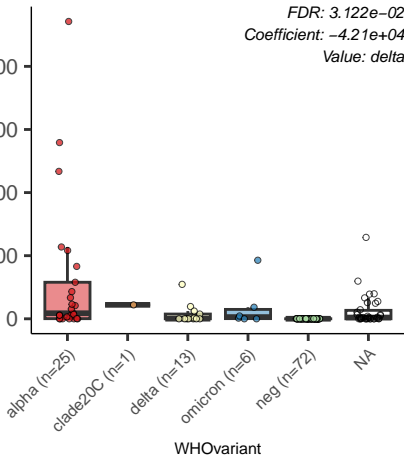

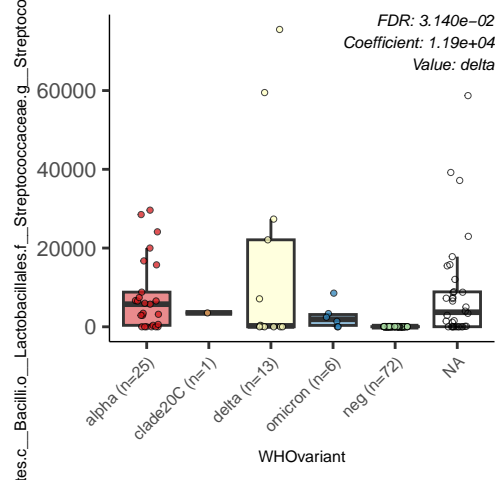

cutes.c\_\_Clostridia.o\_\_Eubacteriales.f\_\_Lachnospiraceae.g\_\_Lachnospiraceae

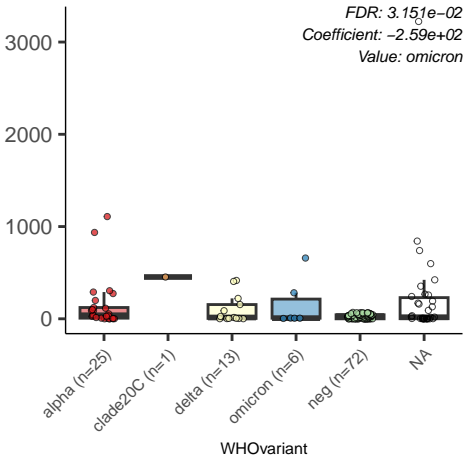

d\_Bacteria.p\_\_Tenericutes

FDR:  $3.181e-02$   
Coefficient:  $-8.90e+03$   
Value: delta

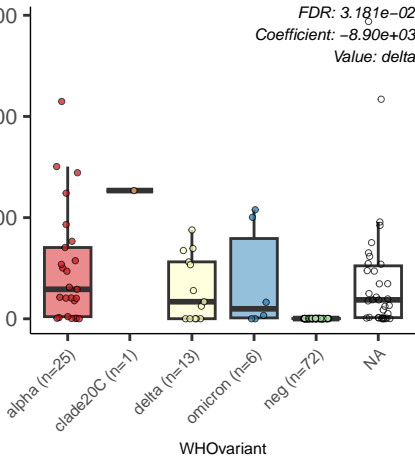



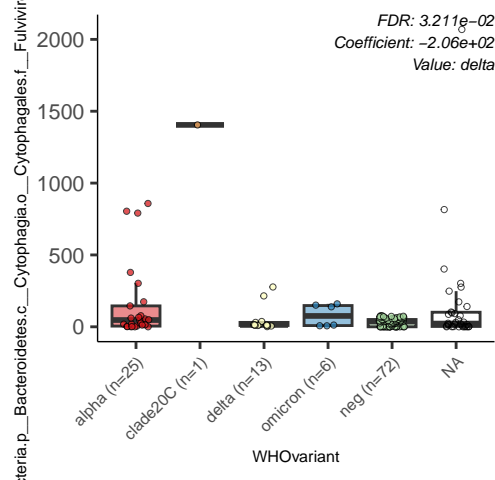

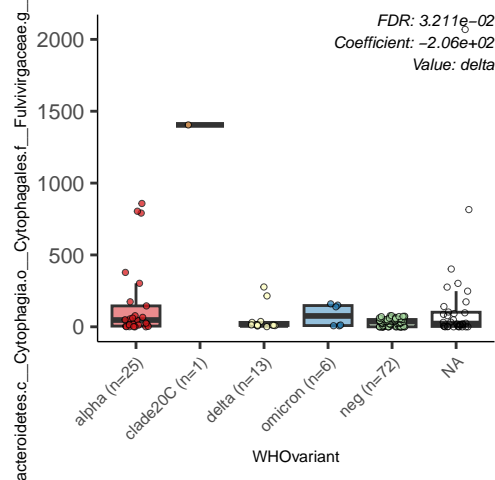

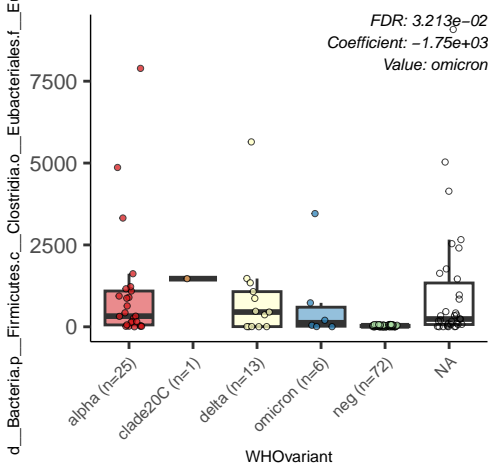

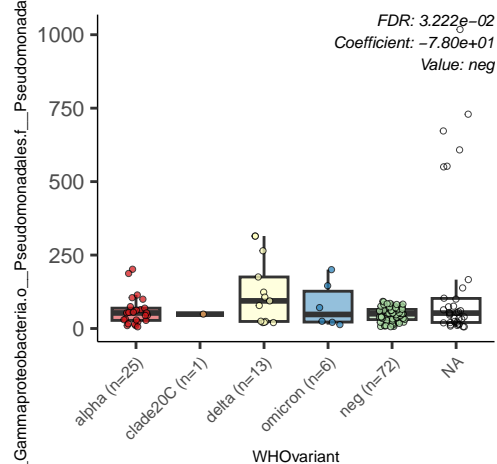

acteria.p\_\_Proteobacteria.c\_\_Betaproteobacteria.o\_\_Burkholderiales

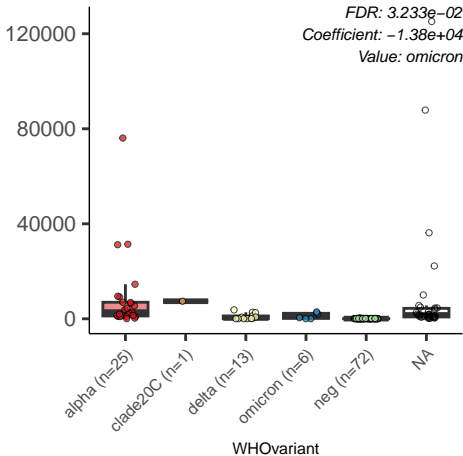



ites.c\_\_Negativicutes.o\_\_Selenomonadales.f\_\_Selenomonadaceae

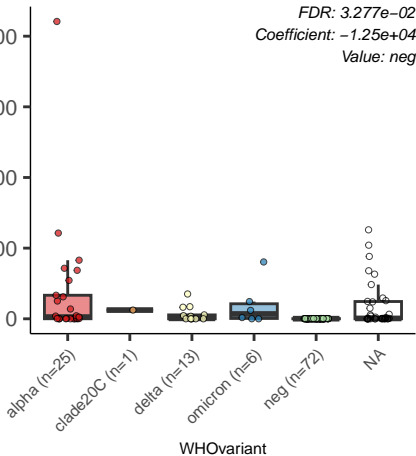

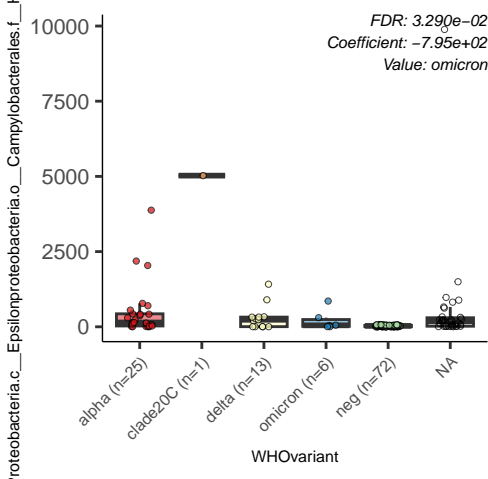



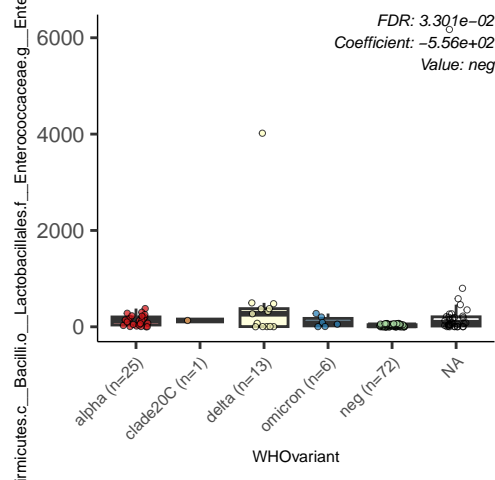

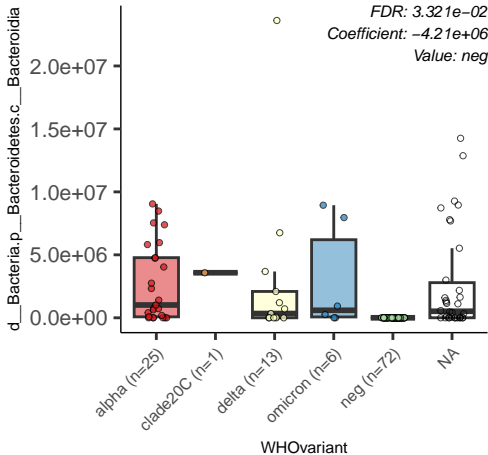

Firmicutes.c\_\_Bacilli.o\_\_Lactobacillales.f\_\_Streptococcaceae.g\_\_Str

*FDR: 3.345e-02*  
*Coefficient: 6.96e+03*  
*Value: delta*

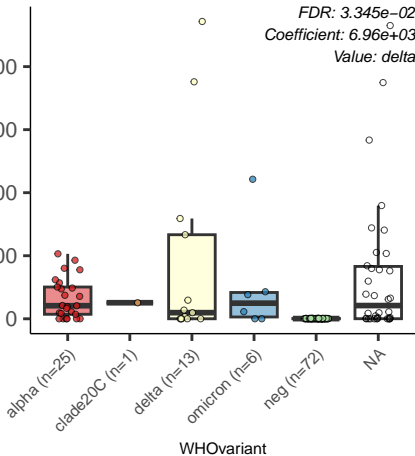

.c\_Actinomycetia.o\_Pseudonocardiales.f\_Pseudonocardaceae

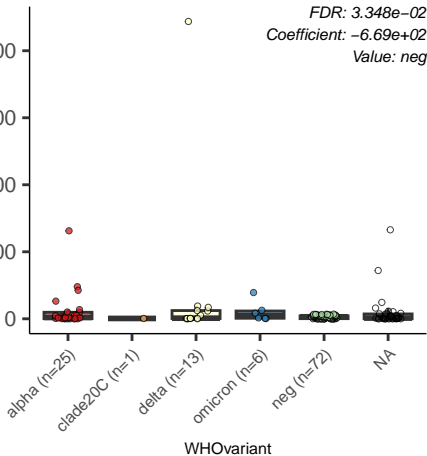

\_Bacteroidetes.c\_\_Bacteroidia.o\_\_Bacteroidales.f\_\_Prevotellaceae.

FDR:  $3.353e-02$   
Coefficient:  $-4.73e+04$   
Value: neg

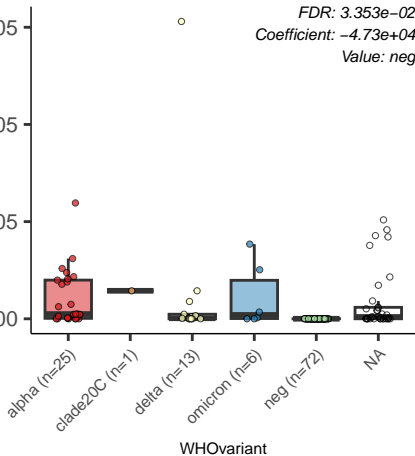

FDR:  $3.361e-02$   
Coefficient:  $-3.26e+05$   
Value: omicron

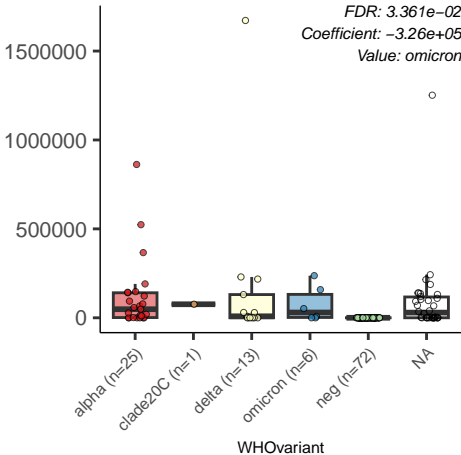

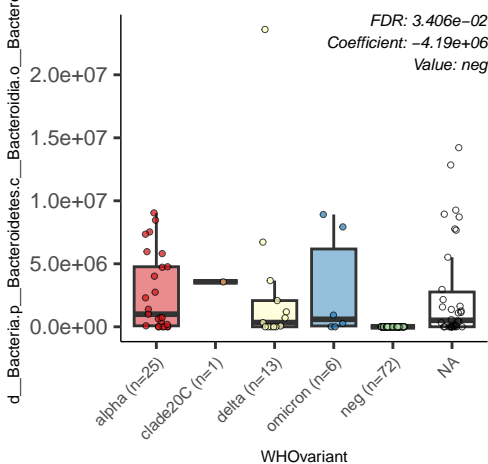

icutes.c\_\_Bacilli.o\_\_Lactobacillales.f\_\_Streptococcaceae.g\_\_Streptococcus

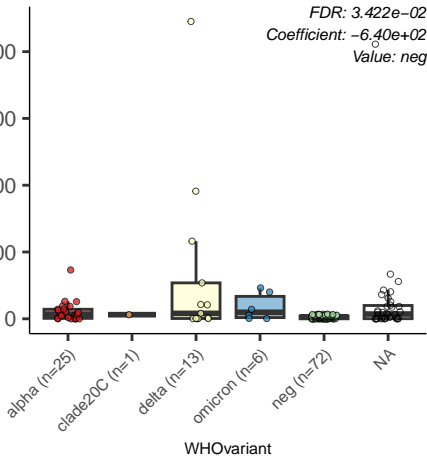



eria.p\_\_Bacteroidetes.c\_\_Bacteroidia.o\_\_Bacteroidales.f\_\_Tannerell

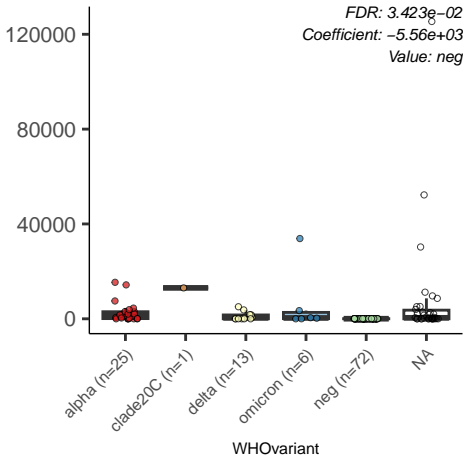

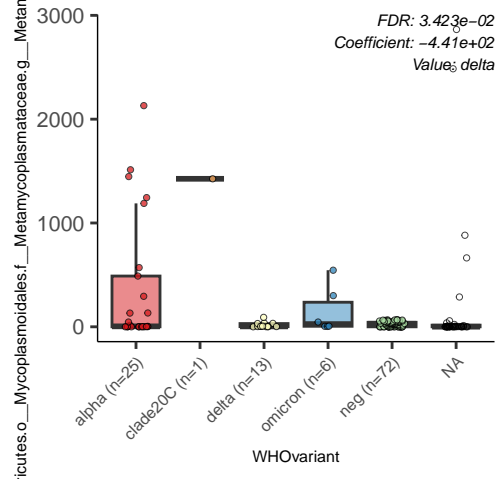

bacteroidetes.c\_\_Bacteroidia.o\_\_Bacteroidales.f\_\_Prevotellaceae.g

FDR:  $3.451e-02$   
Coefficient:  $-3.01e+03$   
Value: neg

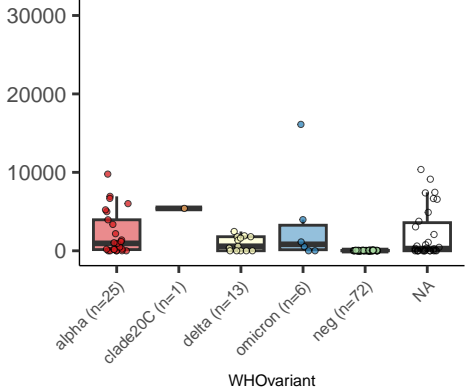

d\_Bacteria.p\_\_Cyanobacteria.o\_\_Chroococcales

FDR:  $3.458e-02$   
Coefficient:  $-1.29e+02$   
Value: delta

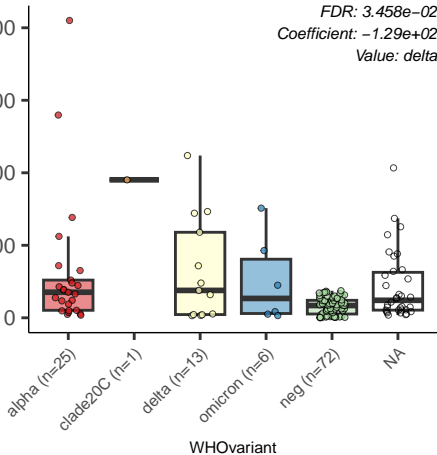

Actinomycetia.o\_\_Propionibacteriales.f\_\_Propionibacteriaceae.g\_\_F

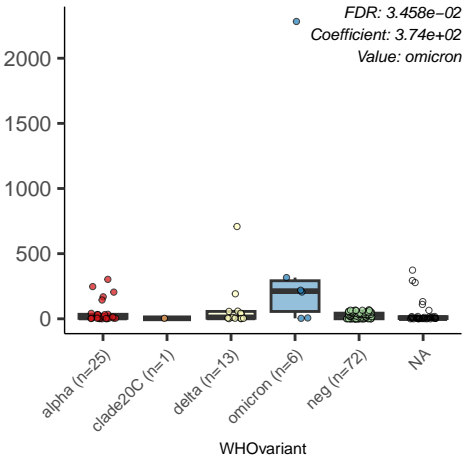

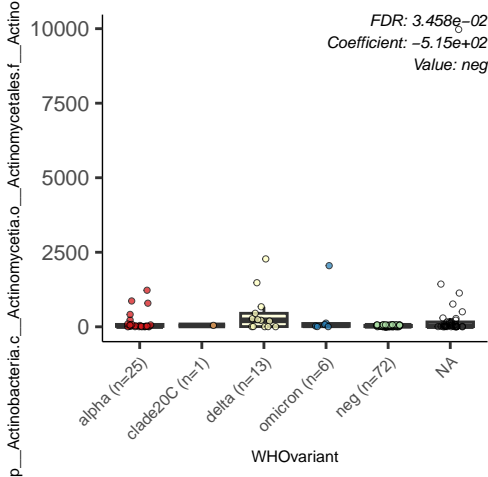

Actinomyces

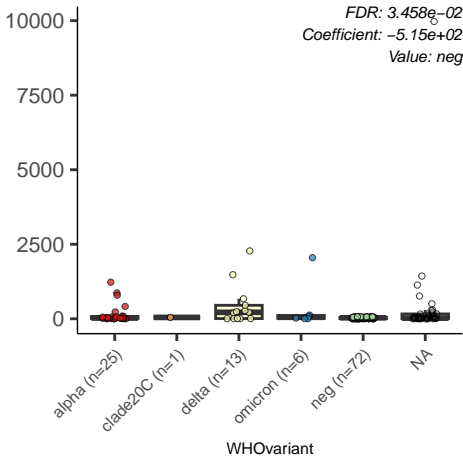

Bacteria.p\_Firmicutes.c\_Clostridia.o\_Eubacteriales.f\_Eubacteri

*FDR: 3.458e-02*  
*Coefficient: -2.66e+02*  
*Value: delta*

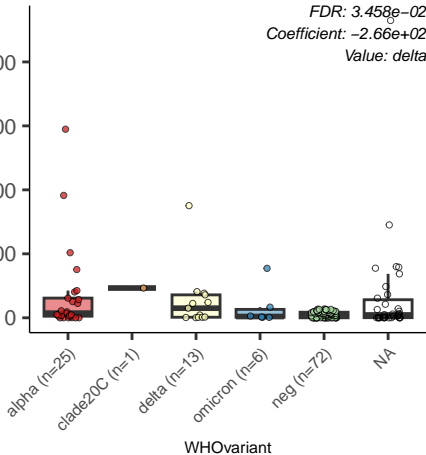



irmicutes.c\_\_Clostridia.o\_\_Eubacteriales.f\_\_Eubacteriaceae.g\_\_Alk

$FDR: 3.458e-02$   
 $Coefficient: -2.66e+02$   
 $Value: delta$

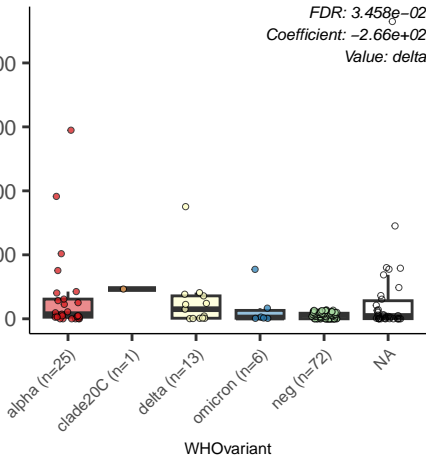

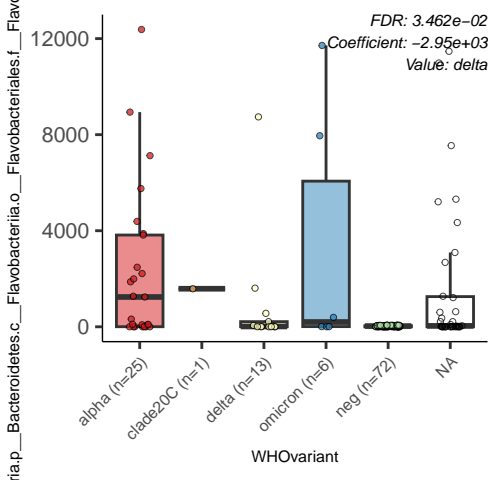

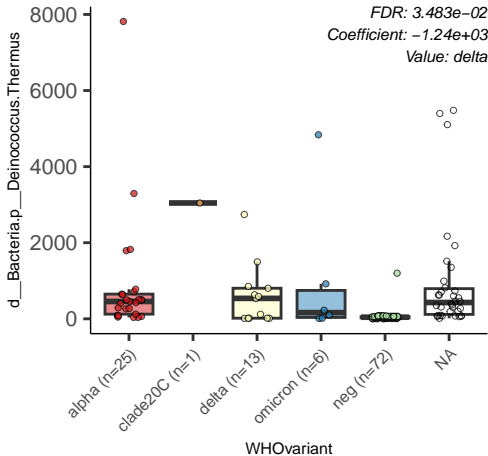

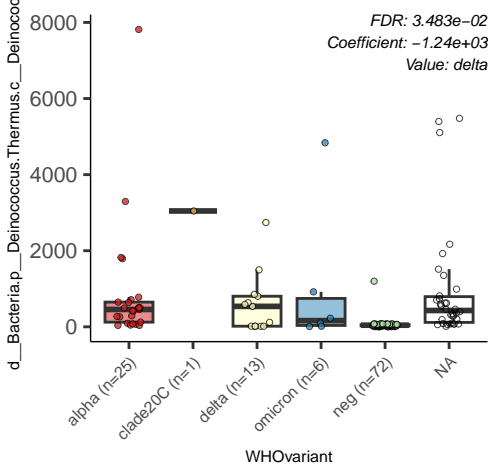

Proteobacteria.c\_\_Gammaproteobacteria.o\_\_Enterobacterales.f\_\_

FDR:  $3.485e-02$   
Coefficient:  $3.55e+02$   
Value: delta

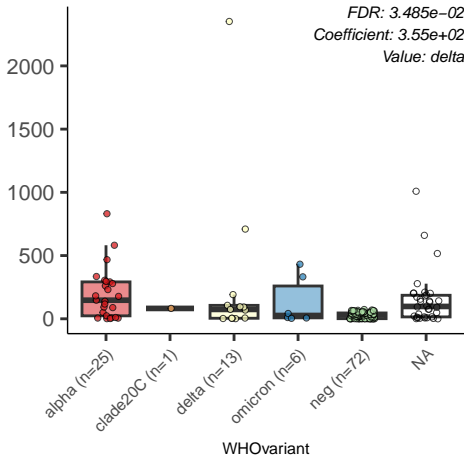

eria.c\_\_Gammaproteobacteria.o\_\_Enterobacterales.f\_\_Morganellac

*FDR: 3.485e-02*  
*Coefficient: 3.55e+02*  
*Value: delta*

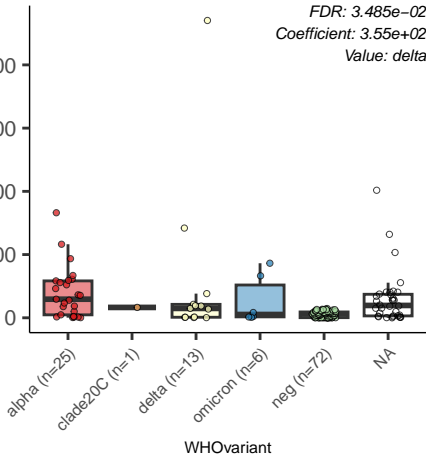

FDR:  $3.515e-02$   
 Coefficient:  $-8.15e+02$   
 Value: clade20C

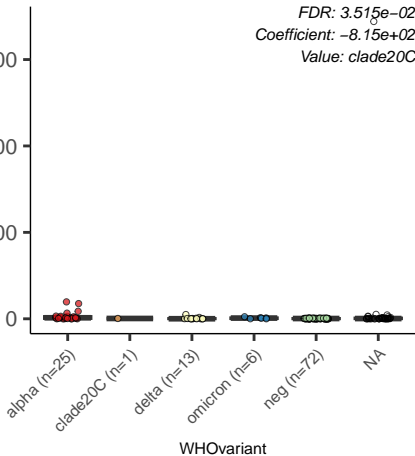

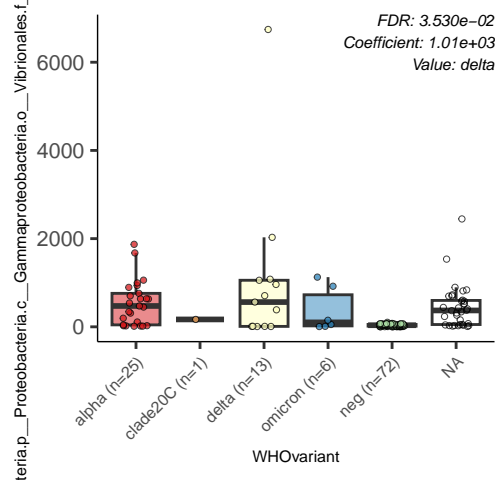



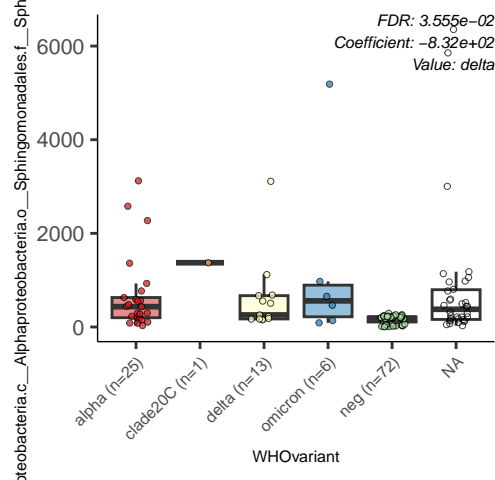

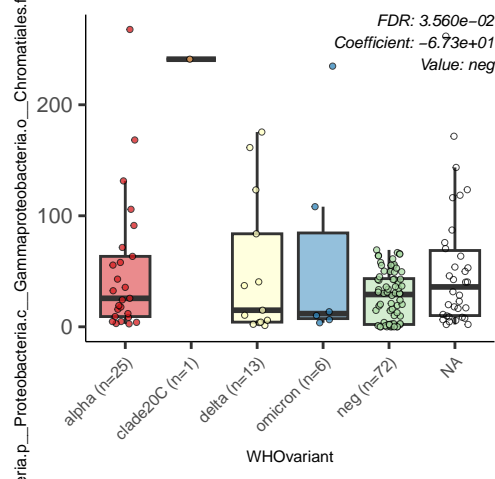

Firmicutes.c\_\_Bacilli.o\_\_Lactobacillales.f\_\_Streptococcaceae.g\_\_St

*FDR: 3.587e-02*  
*Coefficient: 1.10e+03*  
*Value: delta*

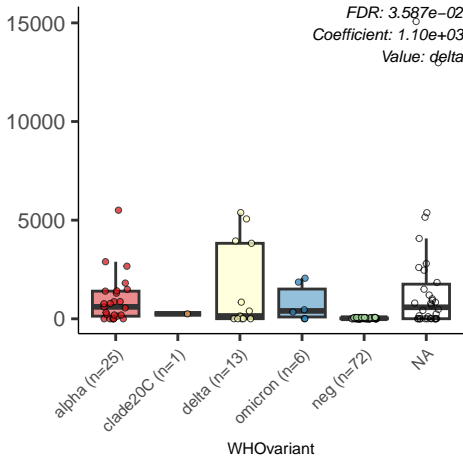



acteria.p\_\_Firmicutes.c\_\_Bacilli.o\_\_Bacillales.f\_\_Staphylococcaceae

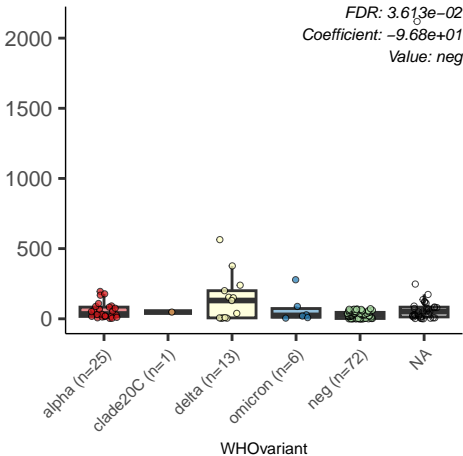

.p\_\_Proteobacteria.c\_\_Betaproteobacteria.o\_\_Burkholderiales.f\_\_C

FDR:  $3.628e-02$   
Coefficient:  $1.79e+03$   
Value: clade20C

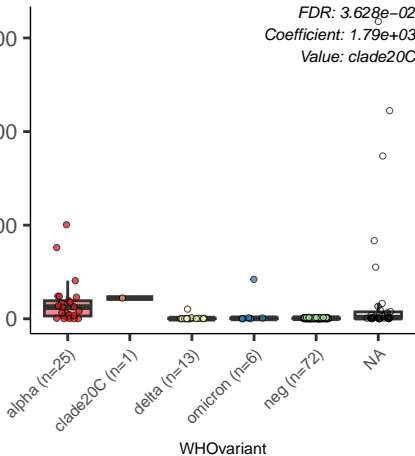

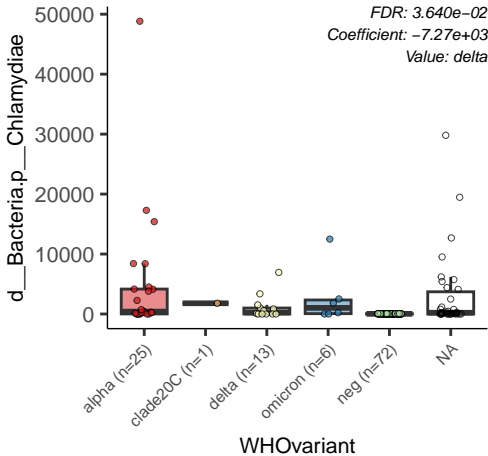

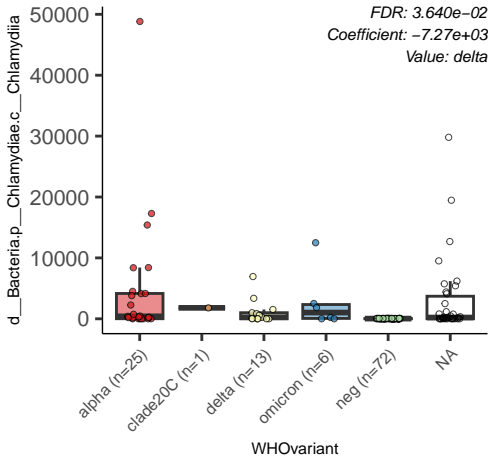



nicutes.c\_\_Bacilli.o\_\_Lactobacillales.f\_\_Streptococcaceae.g\_\_Strep

*FDR: 3.674e-02*  
*Coefficient: 2.33e+03*  
*Value: delta*

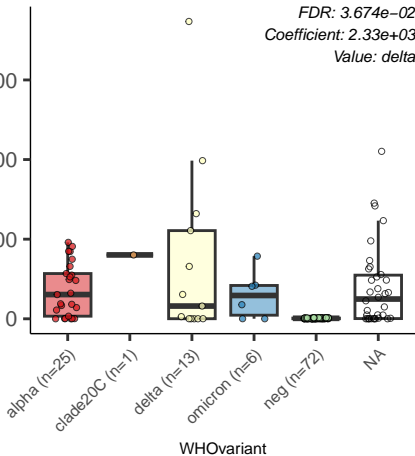

eroidetes.c\_\_Bacteroidia.o\_\_Bacteroidales.f\_\_Bacteroidaceae.g\_\_B

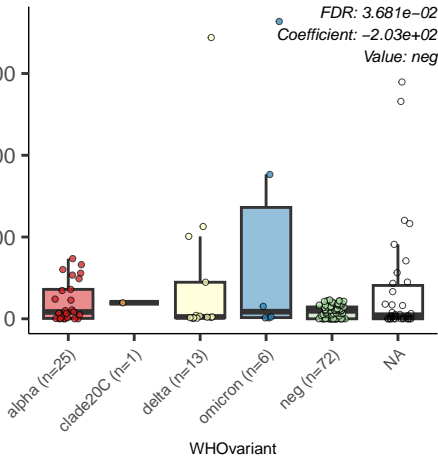

.p\_\_Verrucomicrobia.c\_\_Opitutae.o\_\_Puniceicoccales.f\_\_Puniceico

FDR:  $3.687e-02$   
Coefficient:  $-2.76e+02$   
Value: delta

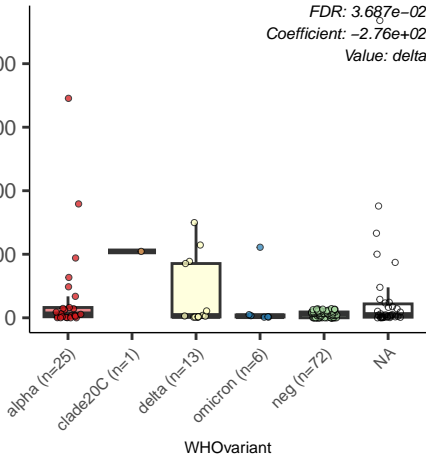

obia.c\_\_Opitutae.o\_\_Puniceicoccales.f\_\_Puniceicoccaceae.g\_\_Corr

FDR:  $3.687e-02$   
Coefficient:  $-2.76e+02$   
Value: delta

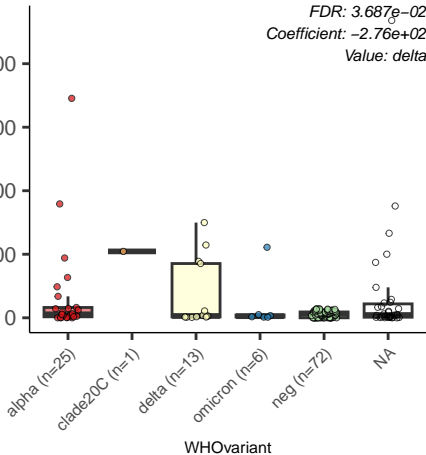

Bacteroidetes.c\_Flavobacteriia.o\_Flavobacteriales.f\_Flavobac

FDR:  $3.687e-02$   
Coefficient:  $-4.53e+02$   
Value: delta

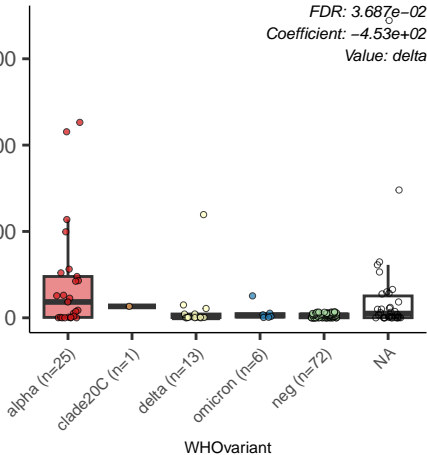

c\_Flavobacteriia.o\_Flavobacteriales.f\_Flavobacteriaceae.g\_Am

FDR:  $3.687e-02$   
Coefficient:  $-4.53e+02$   
Value: delta

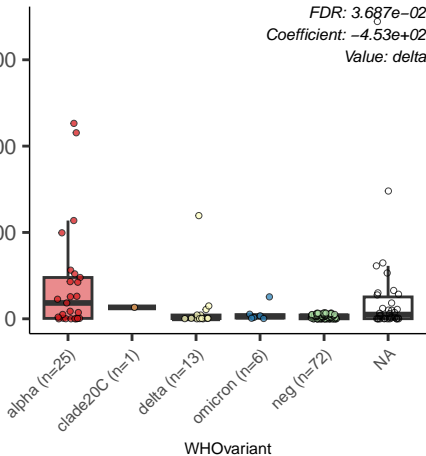

Bacteria.p\_\_Planctomycetes.c\_\_Planctomycetia.o\_\_Pirellulales.f\_\_

FDR:  $3.730e-02$   
Coefficient:  $-4.87e+02$   
Value: neg

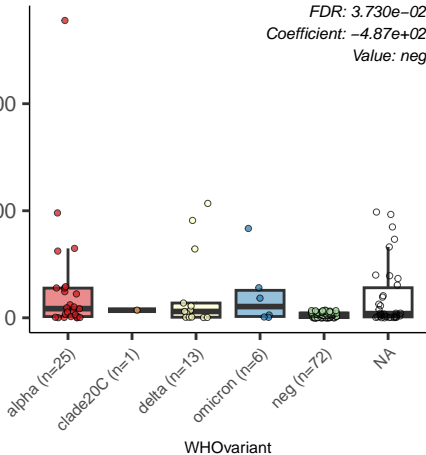

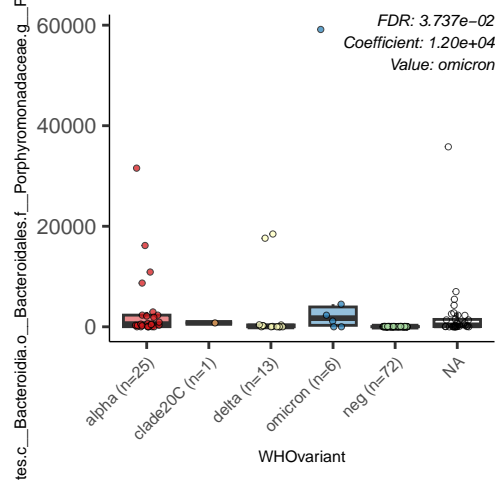



bacteria.c\_Actinomycetia.o\_Actinomycetales.f\_Actinomycetaceae

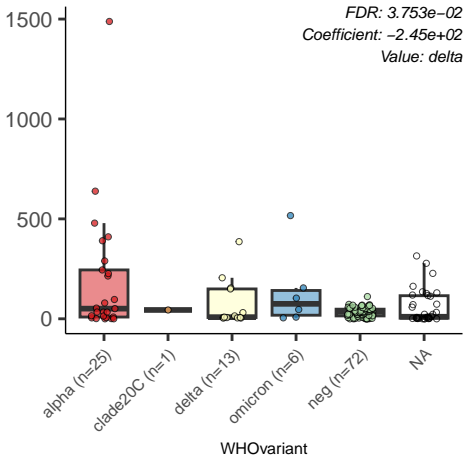

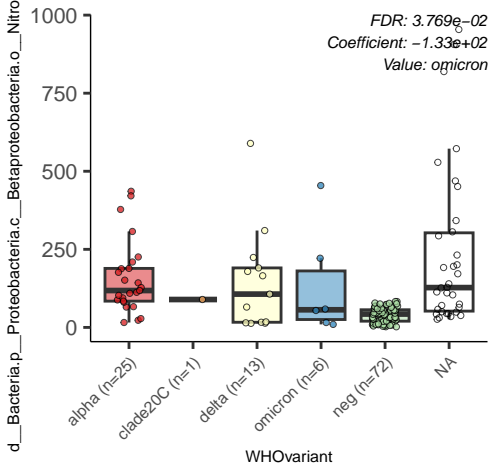

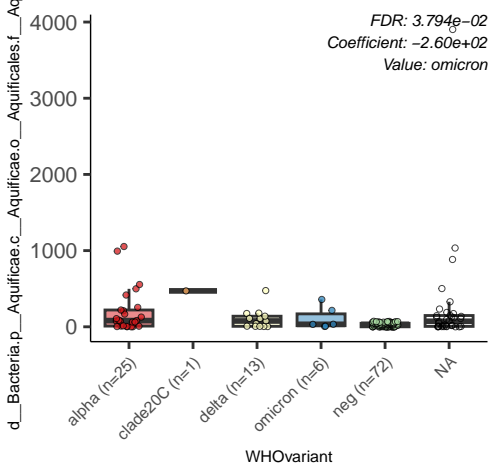

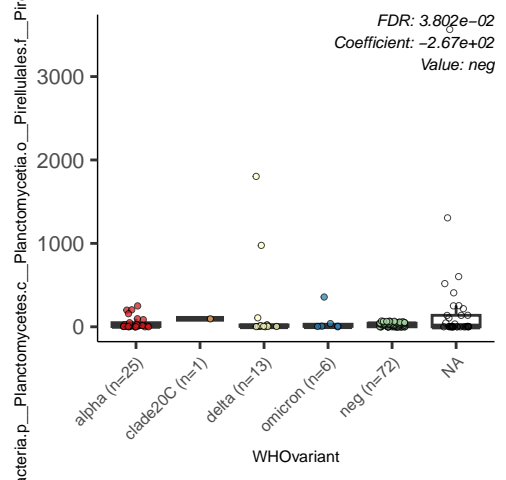

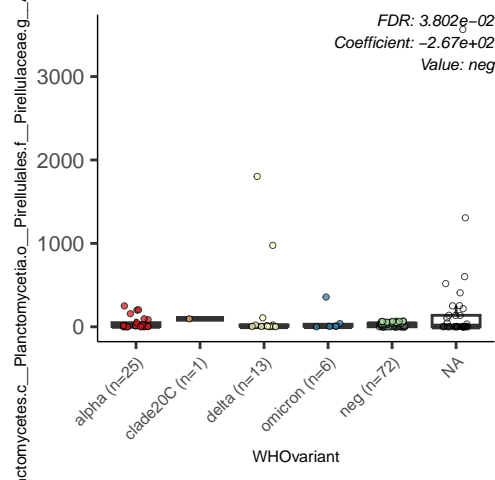

eroidetes.c\_\_Bacteroidia.o\_\_Bacteroidales.f\_\_Prevotellaceae.g\_\_P

*FDR: 3.813e-02*  
*Coefficient: 4.73e+05*  
*Value: clade20C*

1e+06

5e+05

0e+00

alpha (n=25)

clade20C (n=1)

delta (n=13)

omicron (n=6)

neg (n=72)

NA

WHOvariant

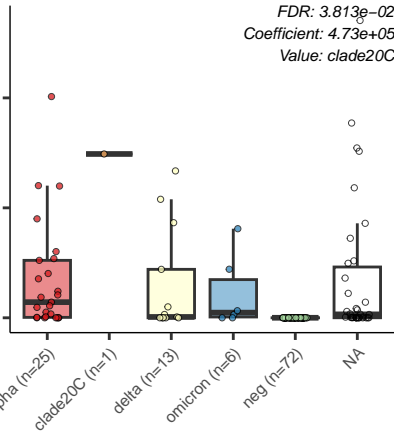

Firmicutes.c\_\_Clostridia.o\_\_Thermoanaerobacterales.f\_\_Thermo

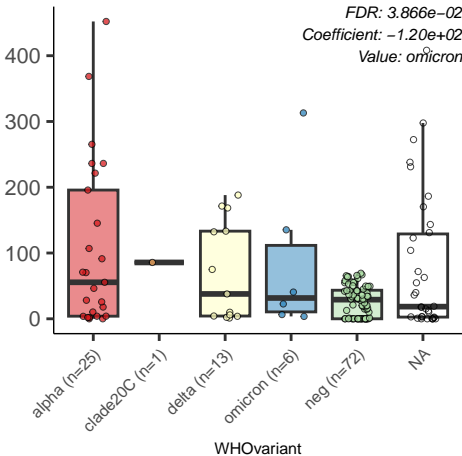

FDR:  $3.897e-02$   
Coefficient:  $-9.24e+02$   
Value: delta

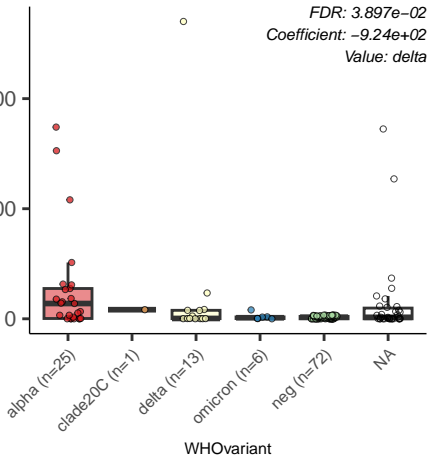



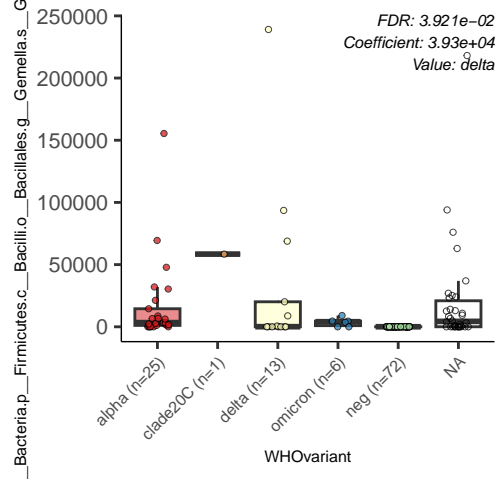

Candidatus.Saccharibacteria.c\_\_Candidatus.Saccharimonadia.o

FDR:  $3.943e-02$   
Coefficient:  $-1.16e+05$   
Value: delta

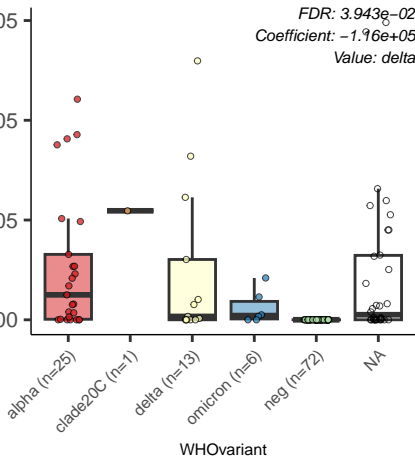

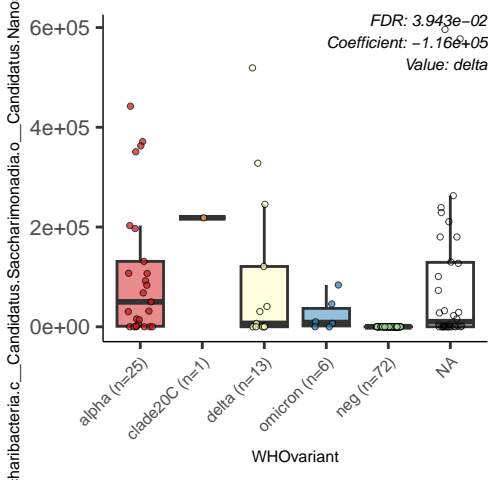

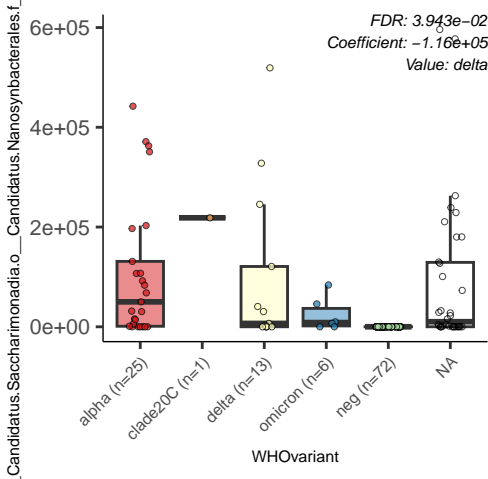

a.p\_\_Cyanobacteria.o\_\_Nostocales.f\_\_Calotrichaceae.g\_\_Calothrix

FDR:  $3.965e-02$   
Coefficient:  $-6.10e+03$   
Value: neg

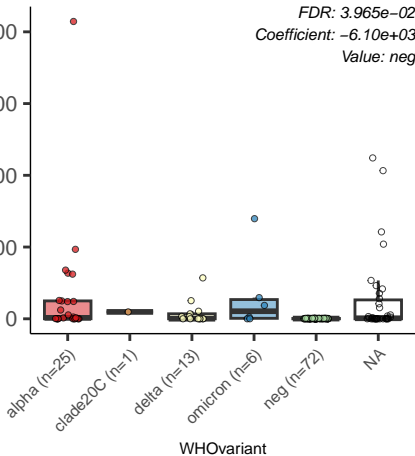

d\_Bacteria.p\_Bacteroidetes.c\_Cytophagia.o\_Cytophagales.f\_

FDR:  $4.036e-02$   
Coefficient:  $-1.50e+02$   
Value: delta

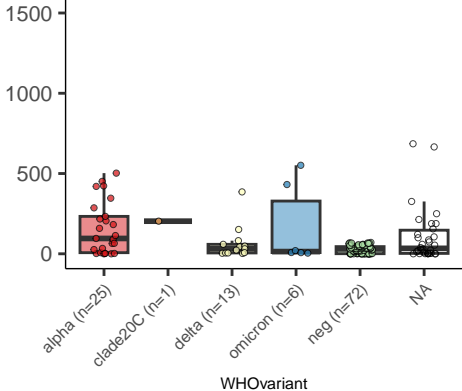

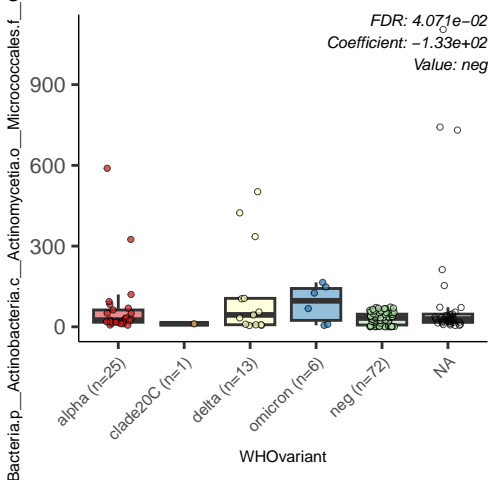

ctinobacteria.c\_\_Actinomycetia.o\_\_Micrococcales.f\_\_Micrococcace

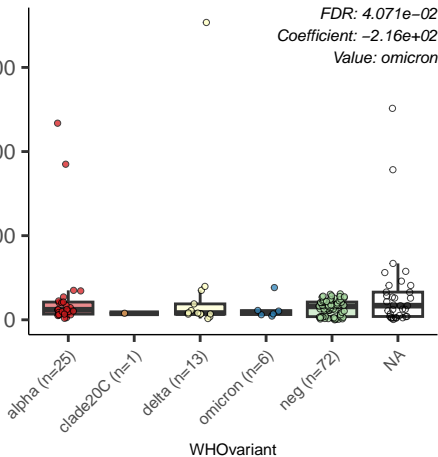



d\_Bacteria.p\_Actinobacteria

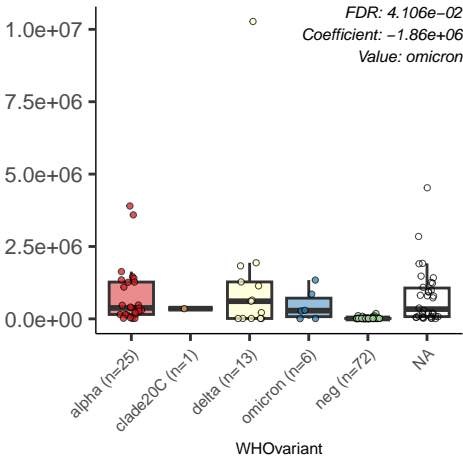

d\_Bacteria.p\_Bacteroidetes.c\_Cytophagia.o\_Cytophagales.f\_

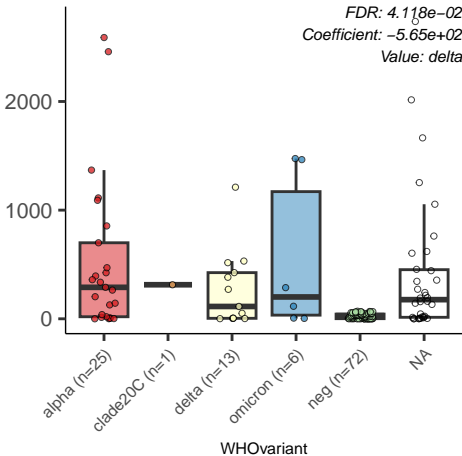

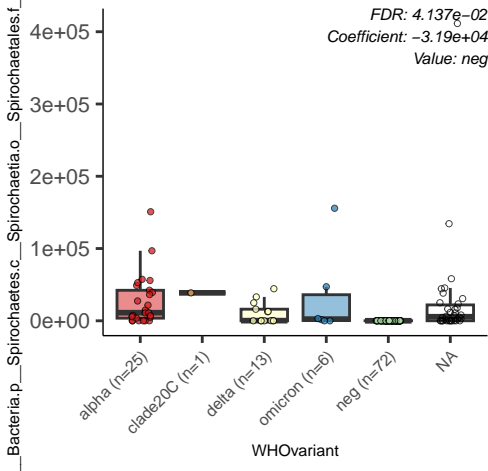

eria.p\_\_Spirochaetes.c\_\_Spirochaetia.o\_\_Spirochaetales.f\_\_Trepon

FDR:  $4.137e-02$   
Coefficient:  $-3.19e+04$   
Value: neg

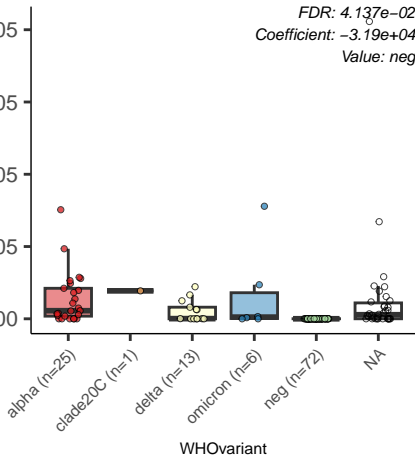

d\_\_Bacteria.p\_\_Armatimonadetes

FDR:  $4.188e-02$   
Coefficient:  $-1.13e+02$   
Value: omicron

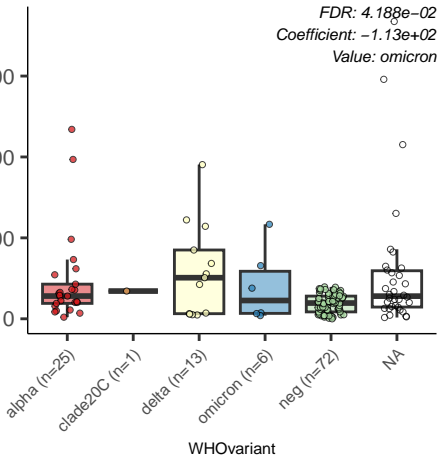

d\_\_Bacteria.p\_\_Firmicutes.c\_\_Bacilli.o\_\_Bacillales.f\_\_Listeriaceae

FDR:  $4.188e-02$   
Coefficient:  $-3.20e+03$   
Value: neg

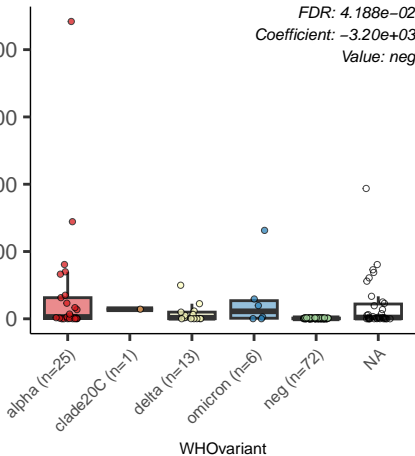

Firmicutes.c\_\_Bacilli.o\_\_Bacillales.f\_\_Listeriaceae.g\_\_Brochothrix

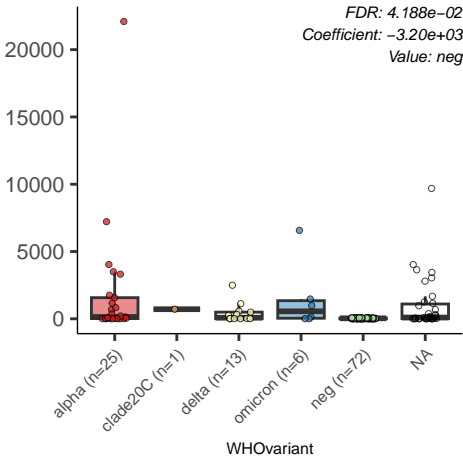

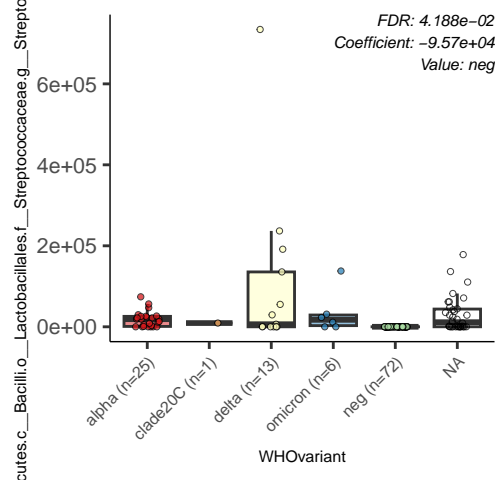



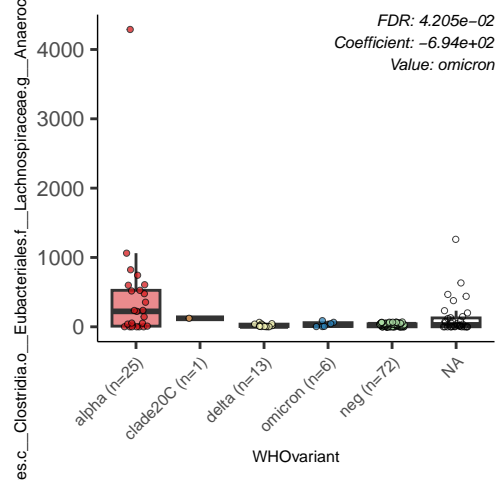

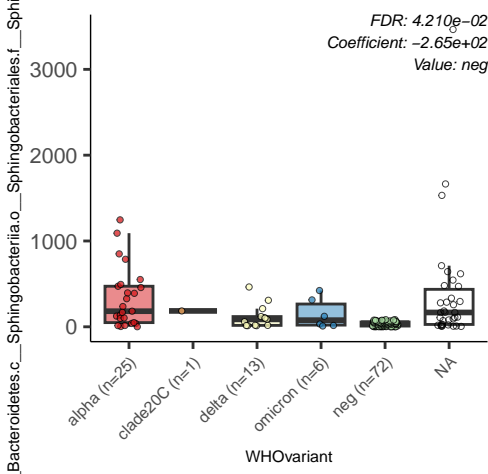

Negativicutes.o\_\_Acidaminococcales.f\_\_Acidaminococcaceae.g

FDR:  $4.216e-02$   
Coefficient:  $-2.70e+02$   
Value: delta

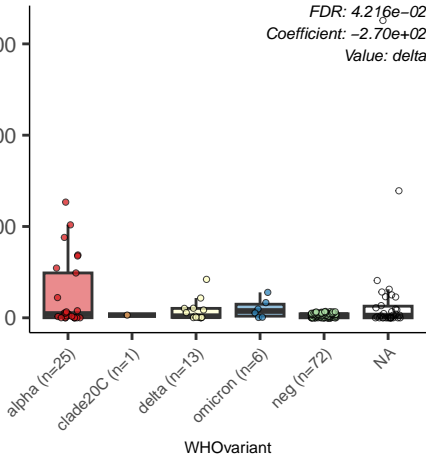

FDR: 4.227e-02  
Coefficient: 2.59e+05  
Value: delta

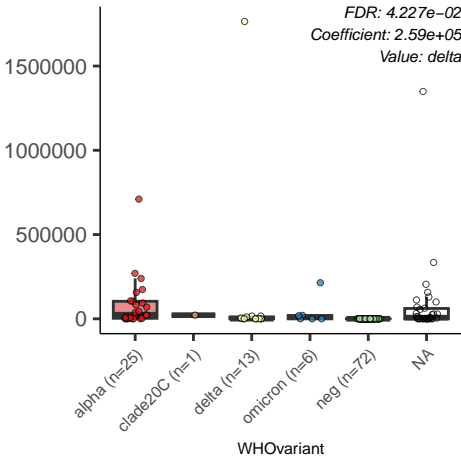

tes.c\_\_Bacilli.o\_\_Lactobacillales.f\_\_Streptococcaceae.g\_\_Streptococcus

FDR:  $4.253e-02$   
Coefficient:  $-3.35e+04$   
Value: clade20C

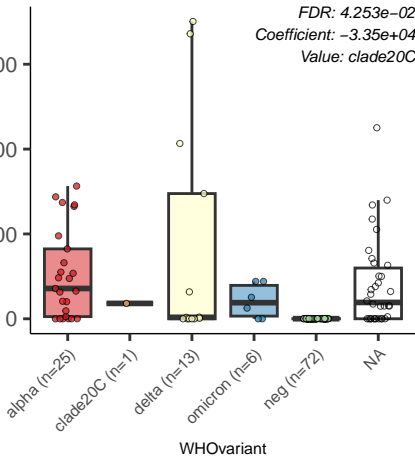

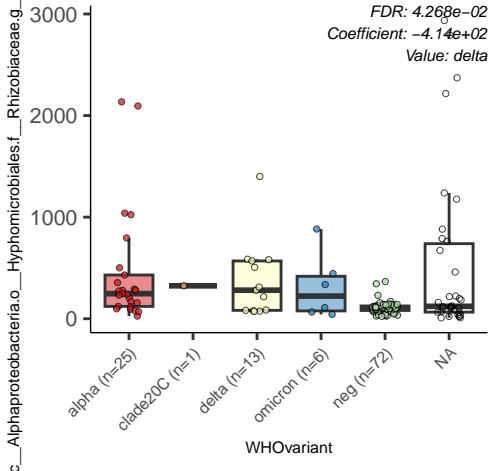

Bacteria.p\_\_Bacteroidetes.c\_\_Flavobacteriia.o\_\_Flavobacteriales

FDR:  $4.273e-02$   
Coefficient:  $-1.23e+04$   
Value: delta

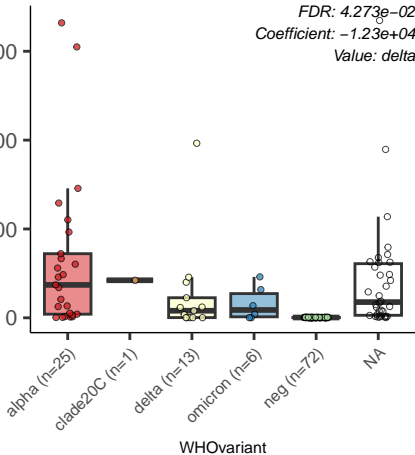

icutes.c\_\_Bacilli.o\_\_Lactobacillales.f\_\_Streptococcaceae.g\_\_Streptococcus

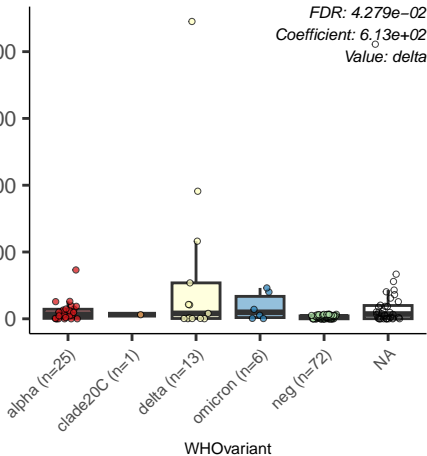



d\_Bacteria.p\_Actinobacteria.c\_Acidimicrobia.o\_Acidimicrobia

FDR:  $4.285e-02$   
Coefficient:  $-1.15e+02$   
Value: omicron

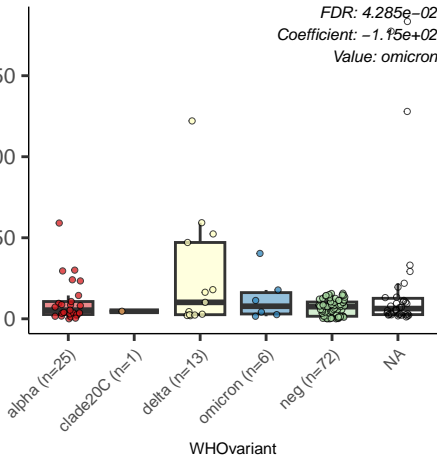

d\_Bacteria.p\_\_Cyanobacteria

FDR:  $4.293e-02$   
Coefficient:  $-8.40e+03$   
Value: delta

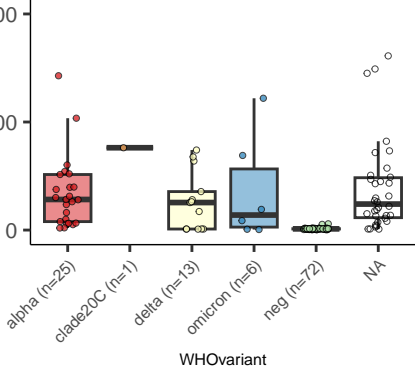

bidetes.c\_\_Bacteroidia.o\_\_Bacteroidales.f\_\_Tannerellaceae.g\_\_Para

FDR:  $4.301e-02$   
Coefficient:  $1.94e+03$   
Value: omicron

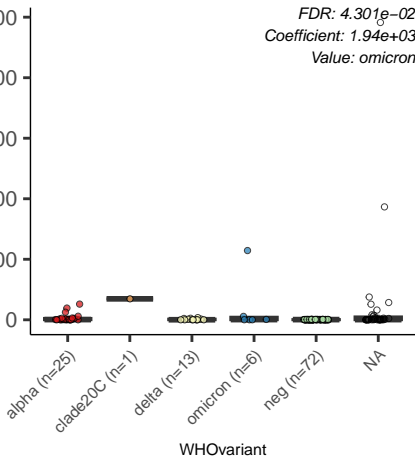

a.p\_Actinobacteria.c\_Actinomycetia.o\_Micrococcales.f\_Microb

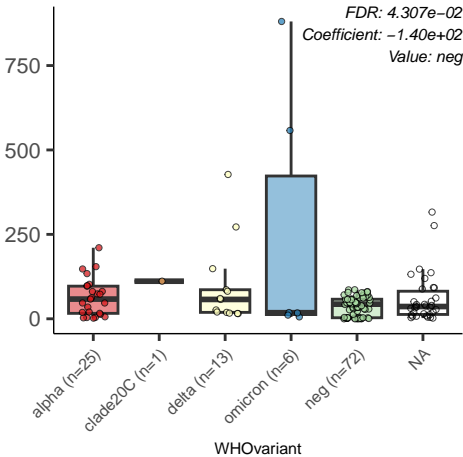

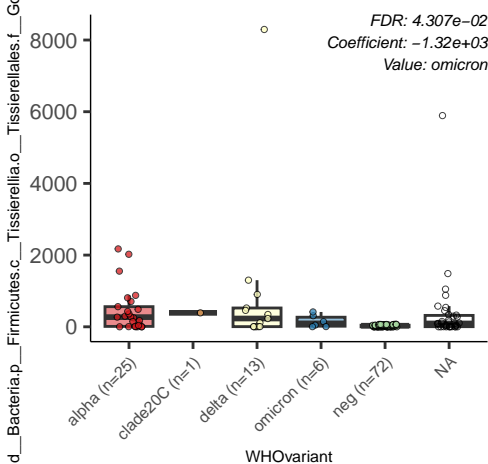

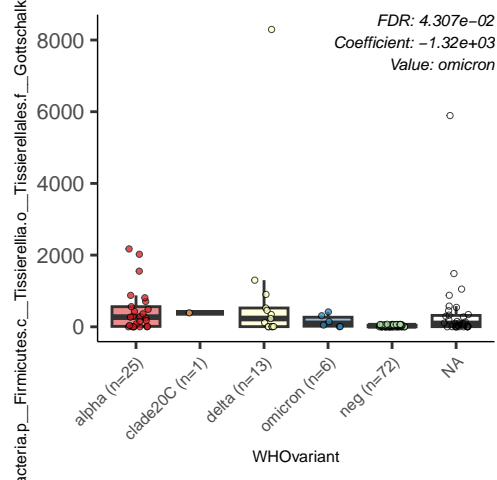

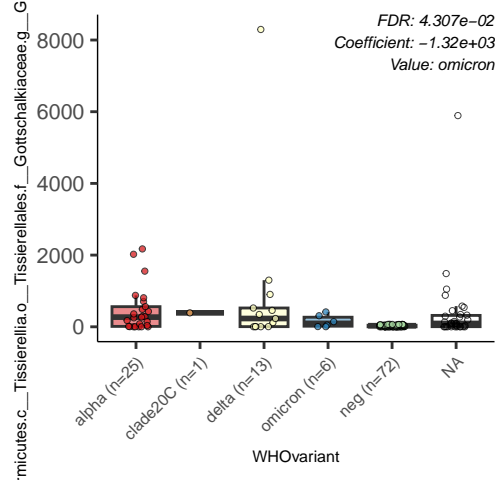

d\_\_Bacteria.p\_\_Tenericutes.c\_\_Mollicutes.o\_\_Acholeplas

FDR:  $4.392e-02$   
Coefficient:  $8.45e+02$   
Value: clade20C

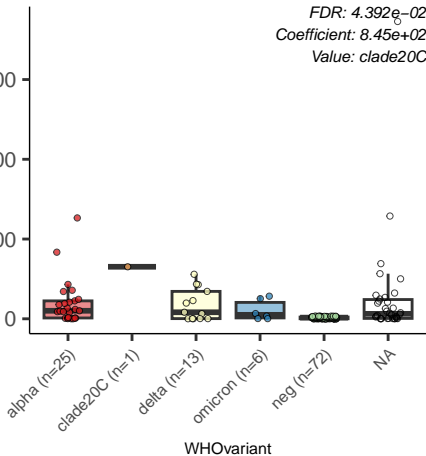



FDR:  $4.392e-02$   
Coefficient:  $8.45e+02$   
Value: clade20C

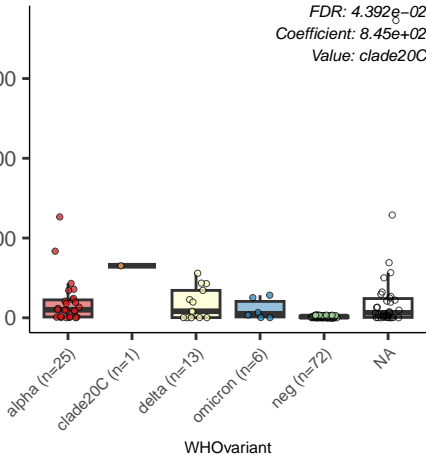

FDR:  $4.412e-02$   
Coefficient:  $9.63e+02$   
Value: clade20C

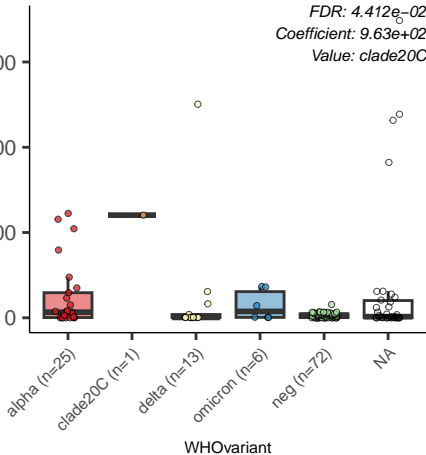

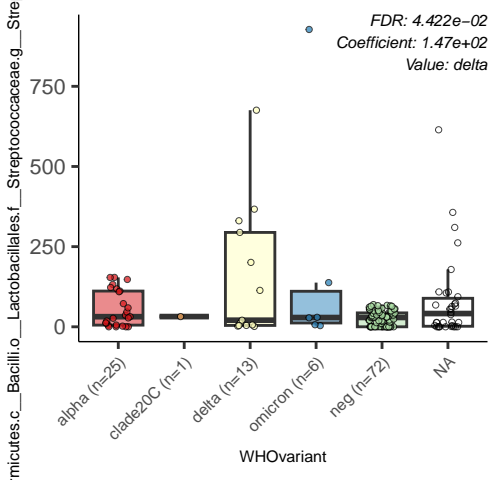

Bacteria.p\_Actinobacteria.c\_Actinomycetia.o\_Micrococcales.f

FDR:  $4.460e-02$   
Coefficient:  $-1.08e+04$   
Value: omicron

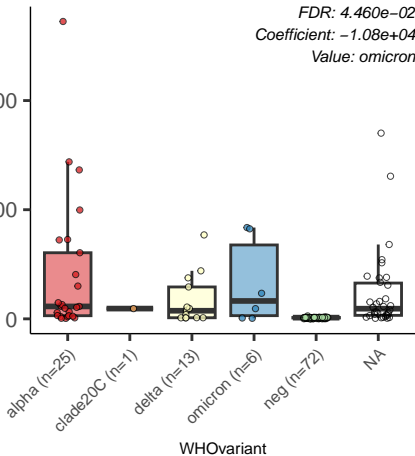

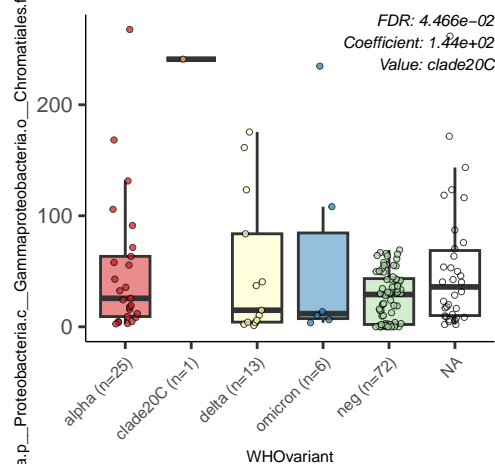

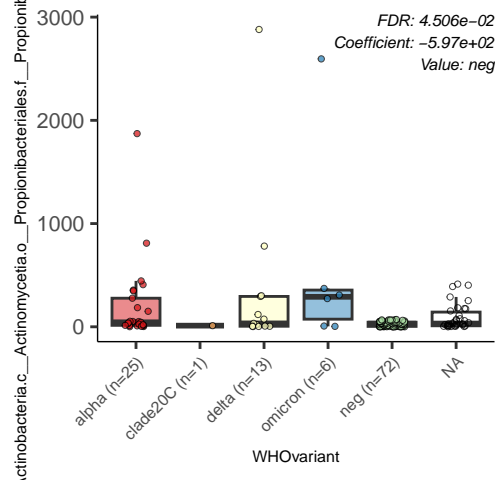

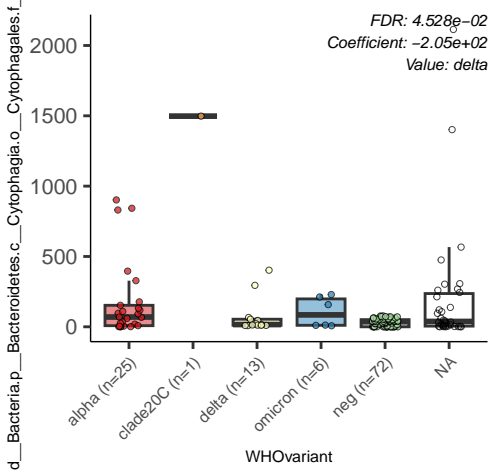

acteria.p\_\_Firmicutes.c\_\_Bacilli.o\_\_Lactobacillales.f\_\_Lactobacillaceae

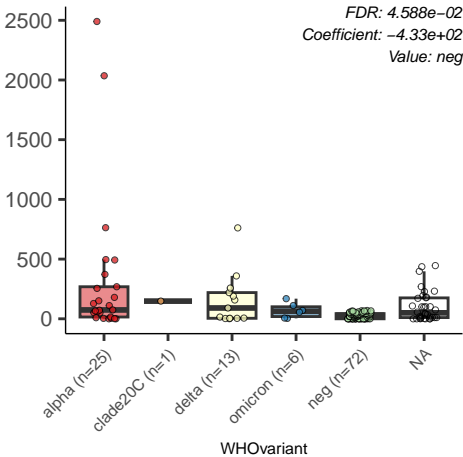



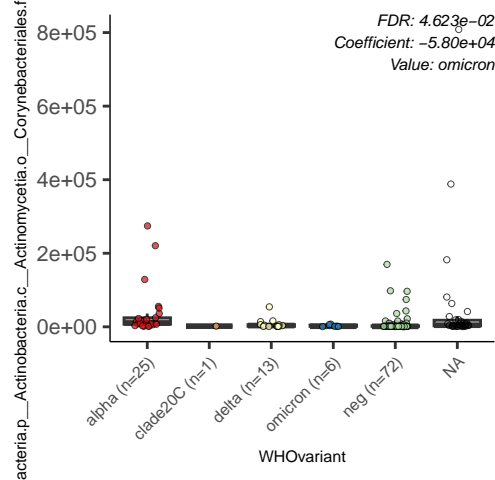

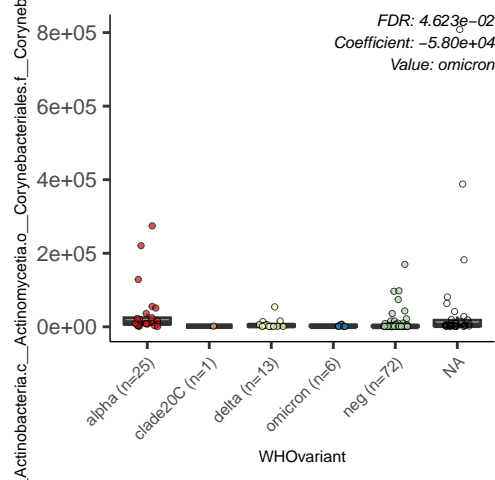

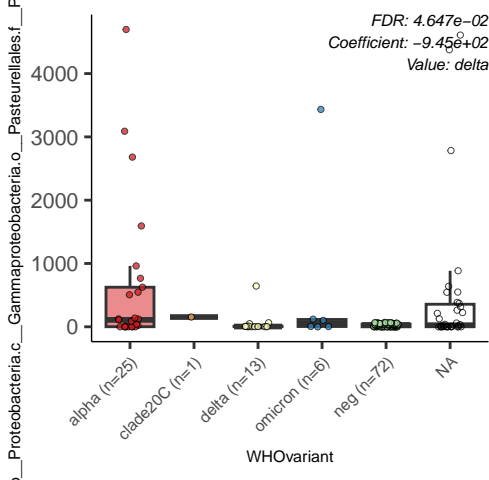

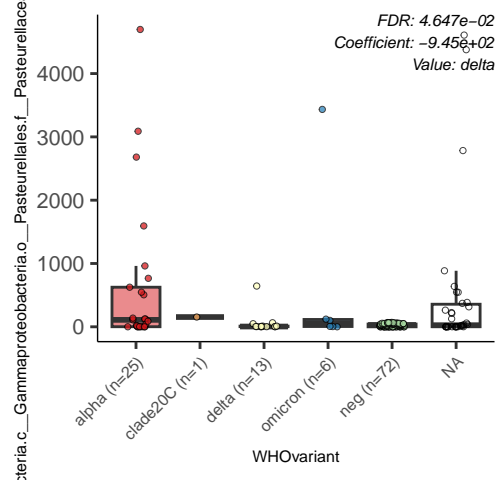

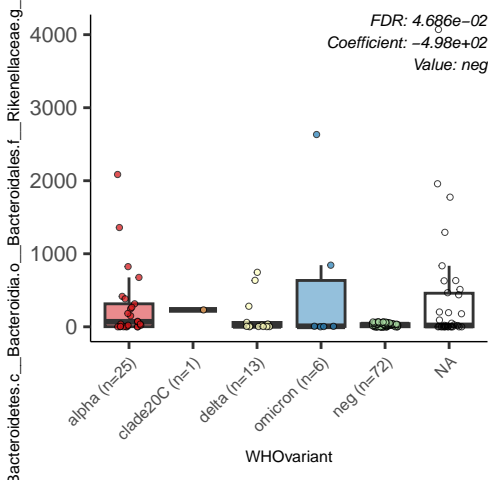

Bacteria.p\_Actinobacteria.c\_Coriobacteriia.o\_Coriobacteriales.f

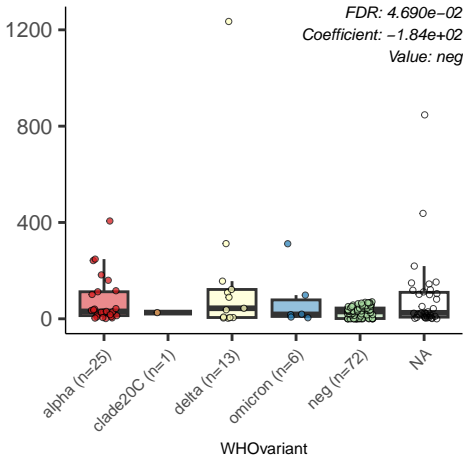

a.c\_\_Actinomycetia.o\_\_Candidatus.Nanopelagiales.f\_\_Candidatus

FDR:  $4.828e-02$   
Coefficient:  $-2.52e+02$   
Value: omicron

1000

500

0

alpha (n=25)

clade20C (n=1)

delta (n=13)

omicron (n=6)

neg (n=72)

NA

WHOvariant

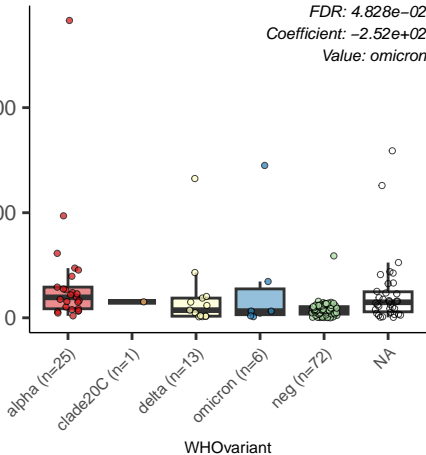

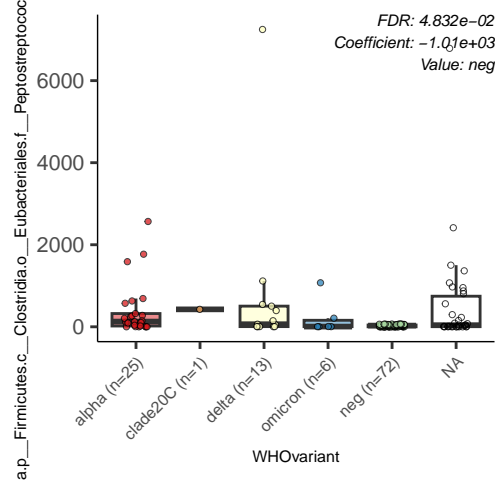



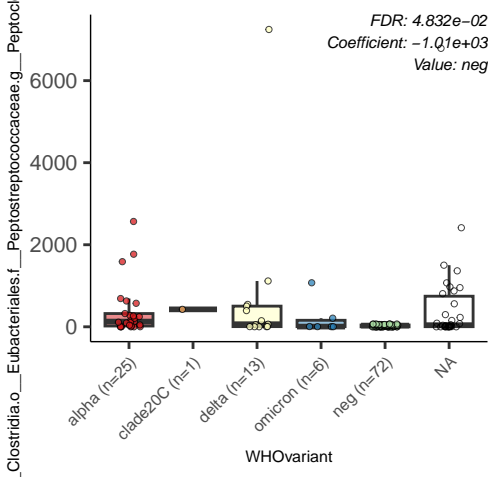

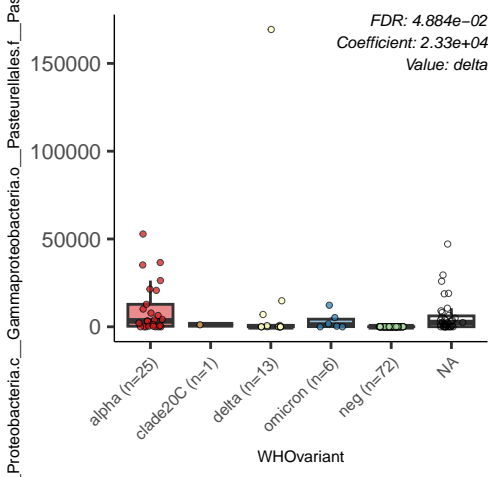

acteria.p\_\_Proteobacteria.c\_\_Alphaproteobacteria.o\_\_Hyphomicrobia

FDR:  $4.990e-02$   
Coefficient:  $5.71e+03$   
Value: clade20C

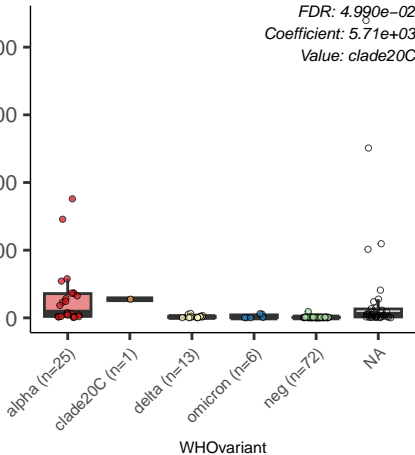

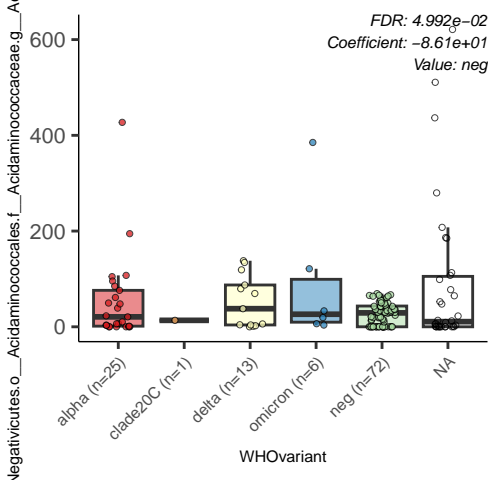

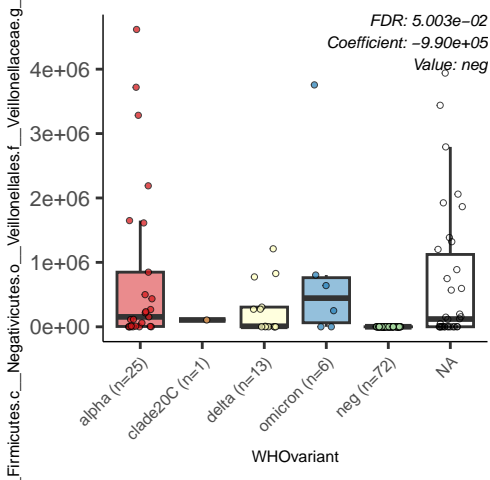



Gamma\_\_Gammaproteobacteria.o\_\_Cardiobacteriales.f\_\_Cardiobacteriaceae

FDR: 5.080e-02  
Coefficient: -1.62e+03  
Value: neg

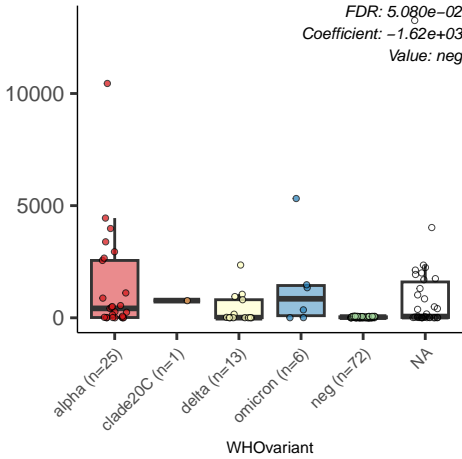

ria.p\_\_Proteobacteria.c\_\_Alphaproteobacteria.o\_\_Sphingomonadales

FDR:  $5.108e-02$   
Coefficient:  $-1.07e+03$   
Value: delta

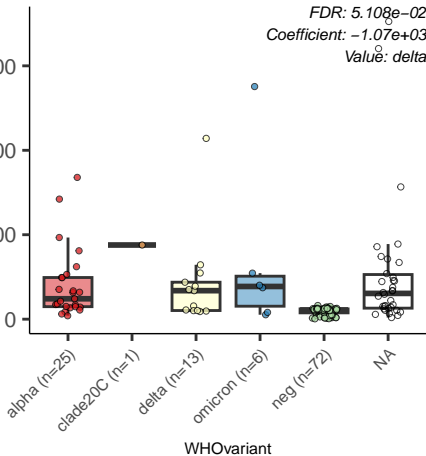



d\_\_Bacteria.p\_\_Candidatus.Omnitrophica

FDR: 5.127e-02

Coefficient: -6.51e+02

Value: delta

6000

4000

2000

0

alpha (n=25)

clade20C (n=1)

delta (n=13)

omicron (n=6)

neg (n=72)

NA

WHOvariant

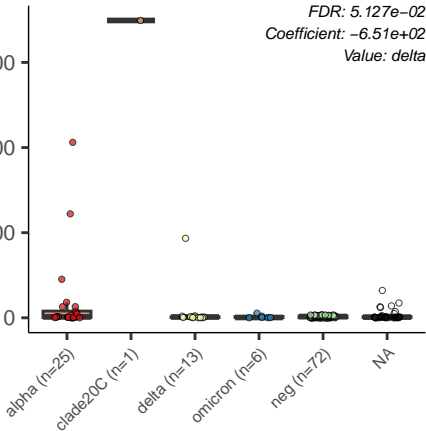

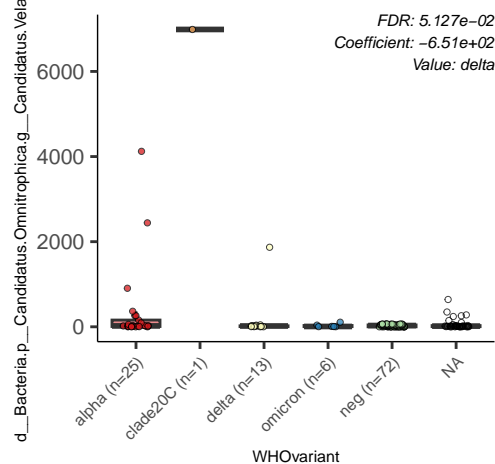

Value: delta

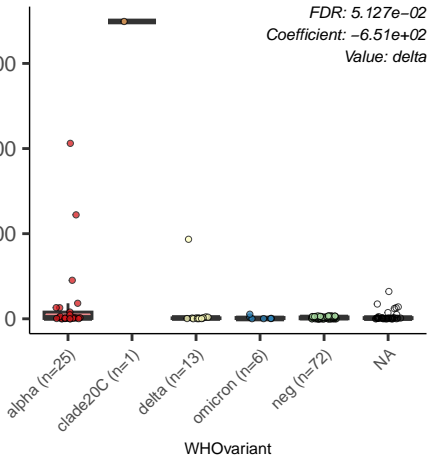

Proteobacteria.c\_\_Gammaproteobacteria.o\_\_Enterobacterales.f\_\_E

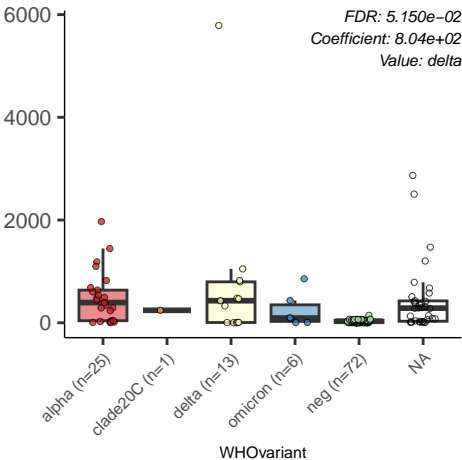

ria.c\_\_Gammaproteobacteria.o\_\_Enterobacterales.f\_\_Enterobacter

FDR:  $5.172e-02$   
Coefficient:  $7.74e+02$   
Value: delta

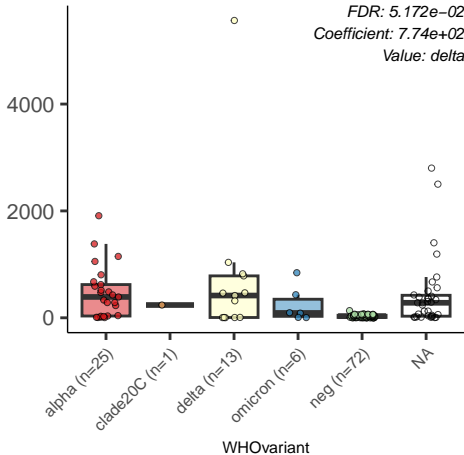

teria.p\_\_Firmicutes.c\_\_Clostridia.o\_\_Eubacteriales.f\_\_Peptococcae

FDR:  $5.172 \times 10^{-2}$   
Coefficient:  $-7.43 \times 10^2$   
Value: delta

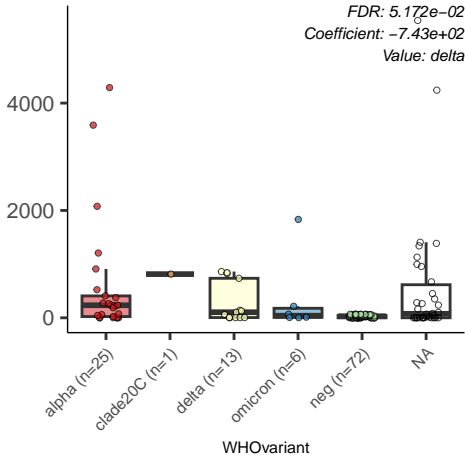

c\_\_Clostridia.o\_\_Eubacteriales.f\_\_Peptococcaceae.g\_\_Dehalobac

FDR:  $5.172e-02$   
Coefficient:  $-7.43e+02$   
Value: delta

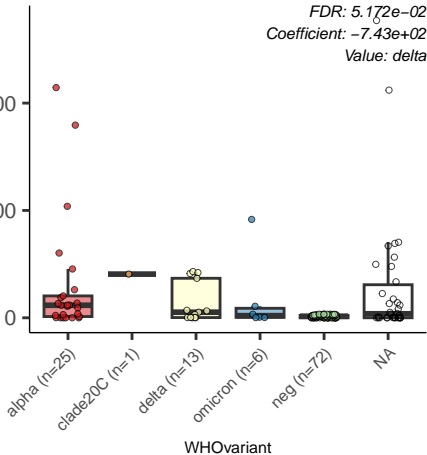

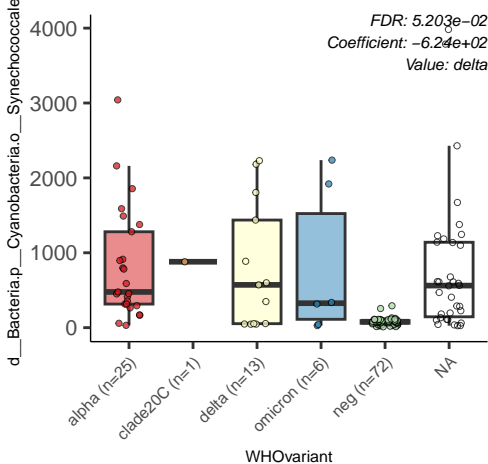



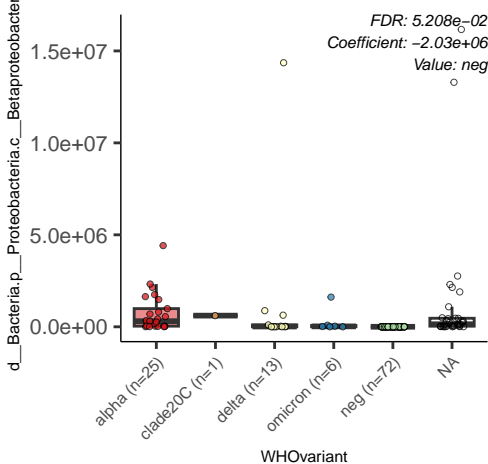

ia.c\_\_Gammaproteobacteria.o\_\_Pasteurellales.f\_\_Pasteurellaceae.

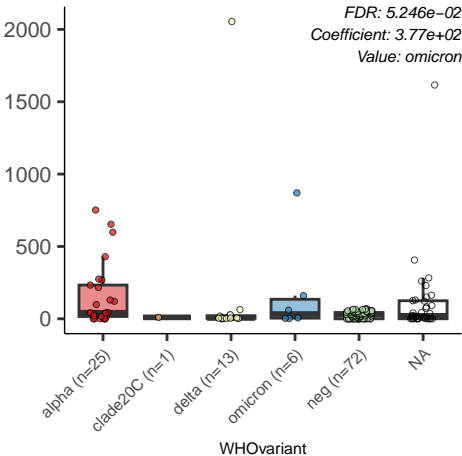

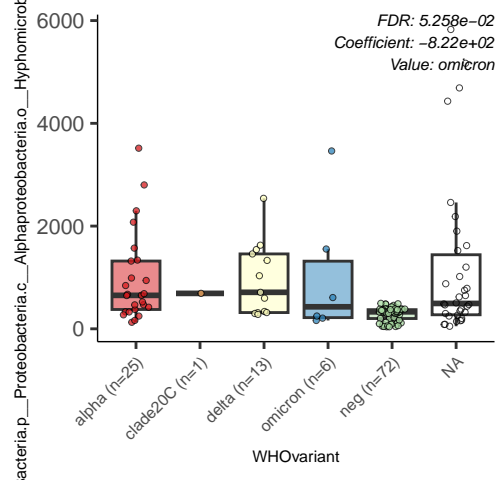

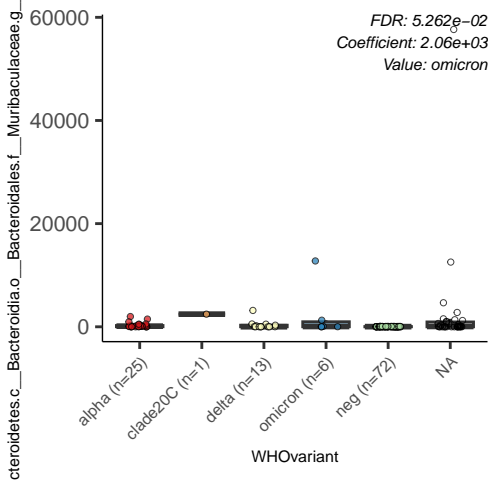

d\_Bacteria.p\_\_Firmicutes.c\_\_Clostridia.o\_\_Eubacteriales.f\_\_Chr

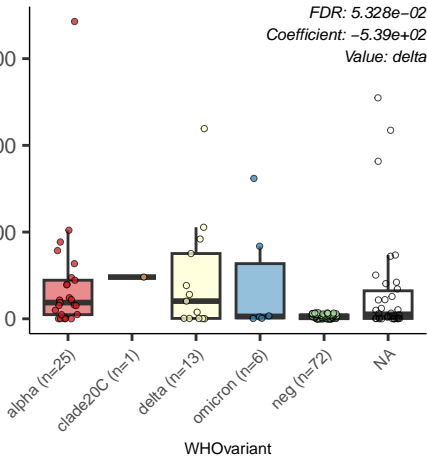

eria.p\_\_Firmicutes.c\_\_Clostridia.o\_\_Eubacteriales.f\_\_Christensenell

FDR: 5.328e-02  
Coefficient: -5.39e+02  
Value: delta

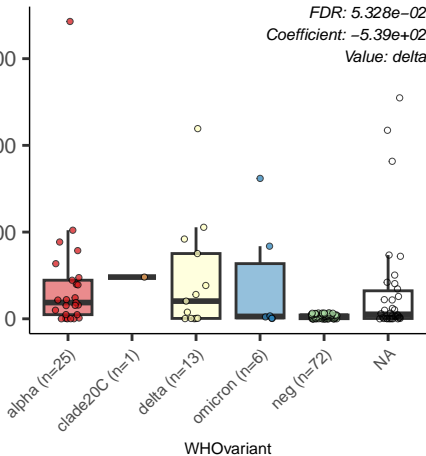

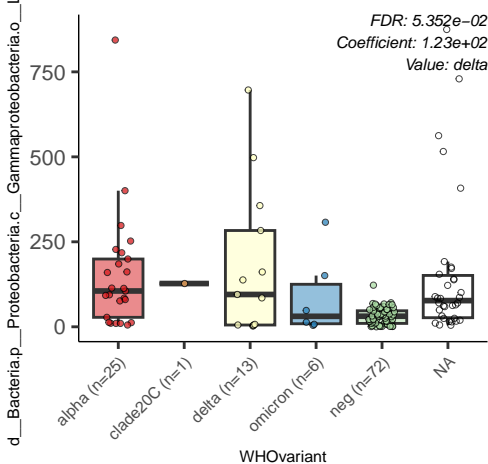

FDR:  $5.362e-02$   
Coefficient:  $-2.36e+03$   
Value: neg

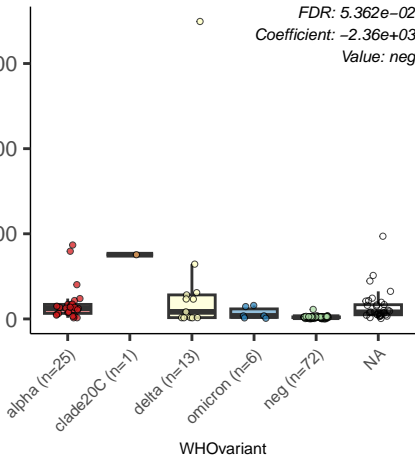



FDR:  $5.376e-02$   
Coefficient:  $-4.19e+02$   
Value: clade20C

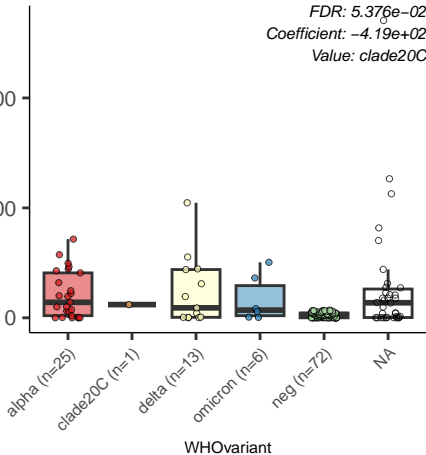

d\_Bacteria.p\_Bacteroidetes.c\_Bacteroidia.o\_Bacteroidales.f

FDR:  $5.386e-02$   
Coefficient:  $-5.30e+02$   
Value: delta

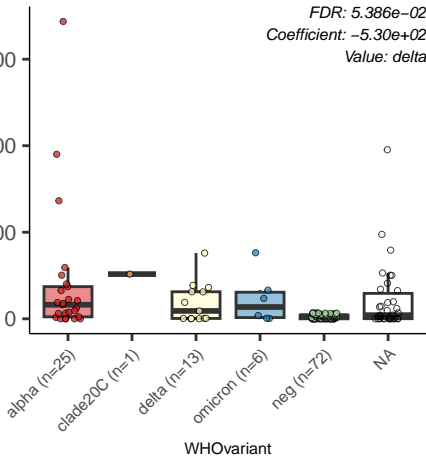



detes.c\_\_Bacteroidia.o\_\_Bacteroidales.f\_\_Paludibacteraceae.g\_\_Pa

*FDR: 5.386e-02*  
*Coefficient: -5.30e+02*  
*Value: delta*

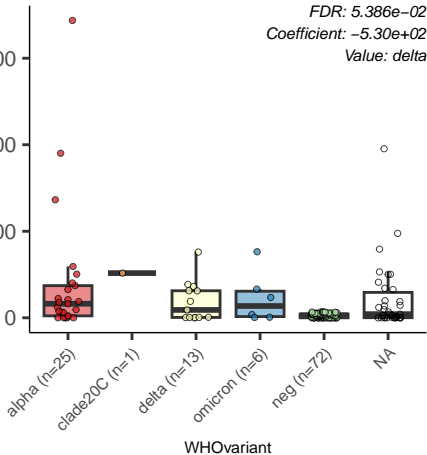

acteria.c\_\_Actinomycetia.o\_\_Actinomycetales.f\_\_Actinomycetaceae

FDR: 5.435e-02  
Coefficient: -2.16e+03  
Value: omicron

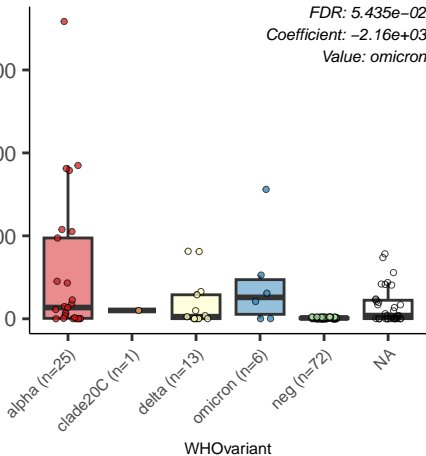

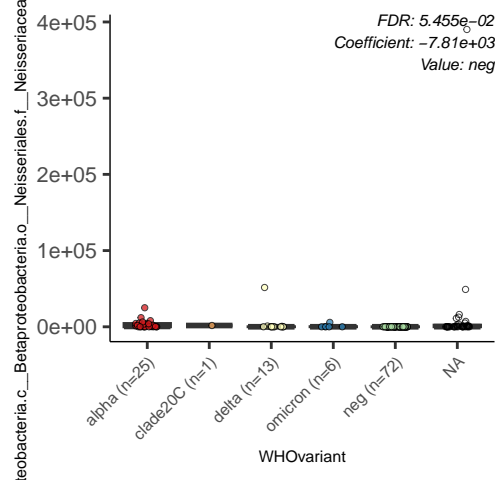

eria.p\_Firmicutes.c\_Clostridia.o\_Eubacteriales.f\_\_Eubacteriales.

*FDR: 5.486e-02*  
*Coefficient: -1.08e+05*  
*Value: neg*

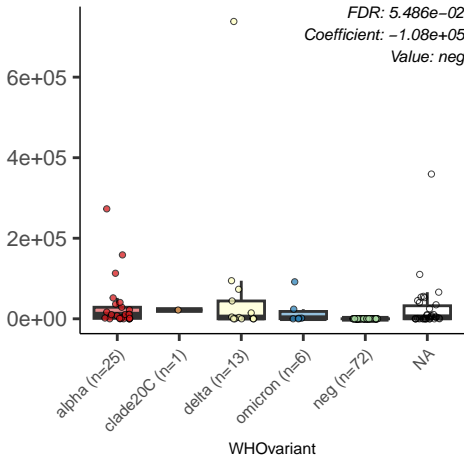

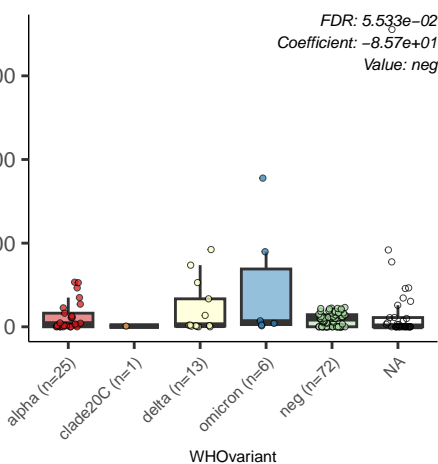



bacteria.c\_\_Actinomycetia.o\_\_Actinomycetales.f\_\_Actinomycetaceae

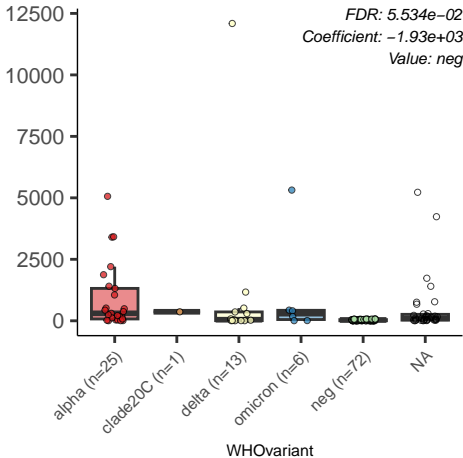

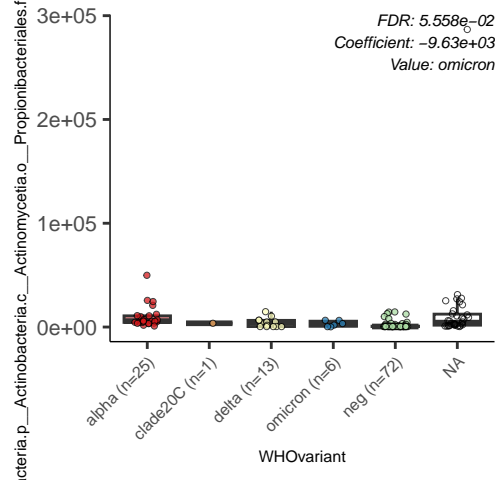

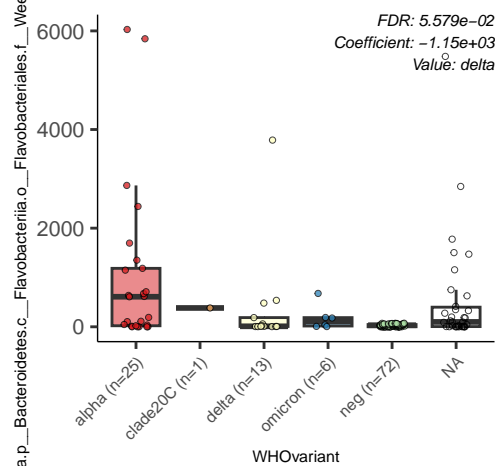

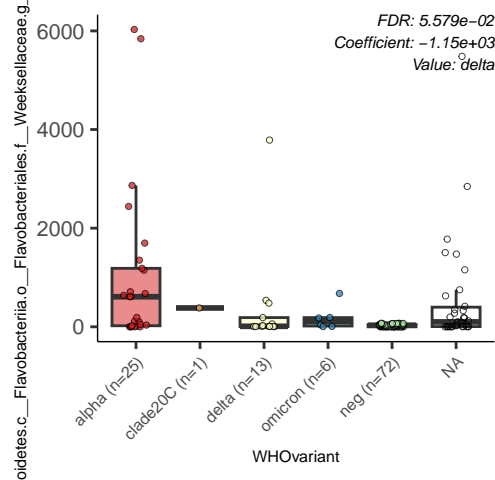

Bacteria.p\_Bacteroidetes.c\_Cytophagia.o\_\_Cytophagales.f\_H

FDR:  $5.619e-02$   
Coefficient:  $-4.78e+03$   
Value: neg

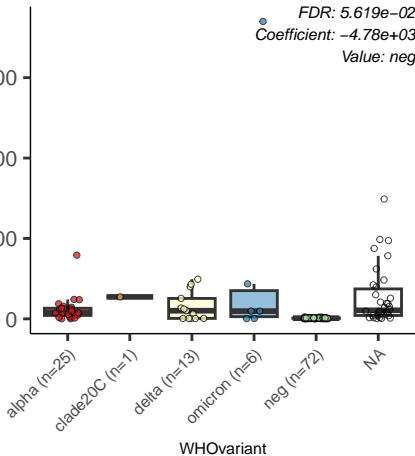

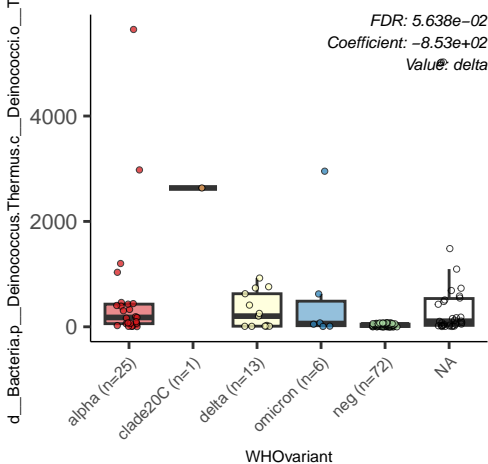

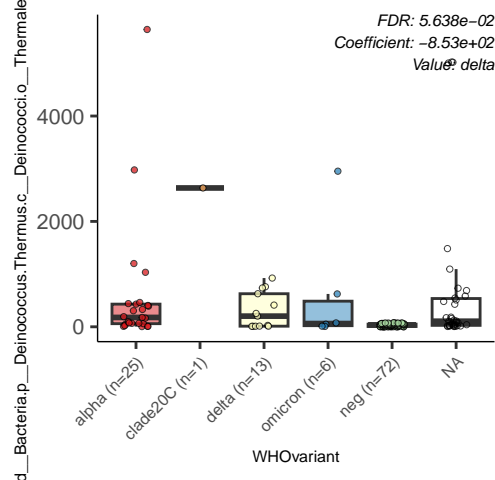

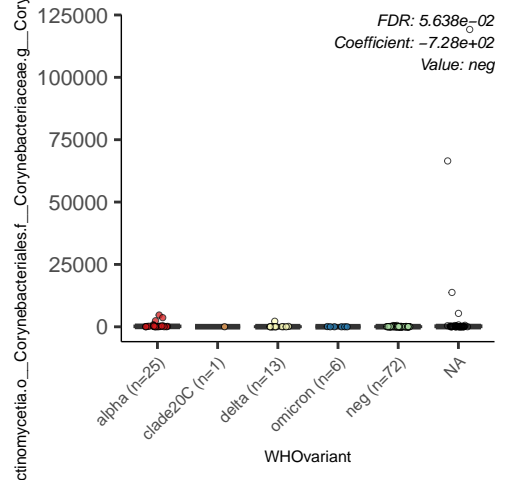



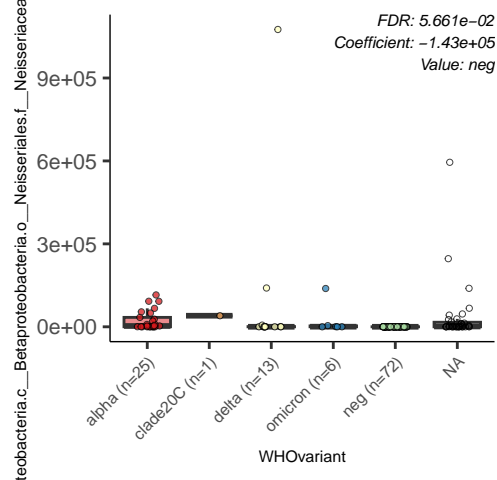

cutes.c\_\_Bacilli.o\_\_Lactobacillales.f\_\_Streptococcaceae.g\_\_Strepto

FDR:  $5.681e-02$   
Coefficient:  $-3.20e+03$   
Value: neg

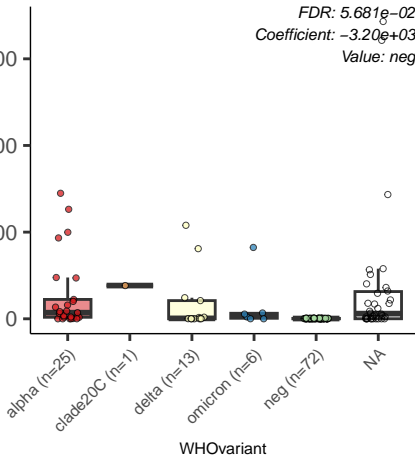

Proteobacteria.c\_\_Alphaproteobacteria.o\_\_Hyphomicrobiales.f\_\_Nit

*FDR: 5.682e-02*  
*Coefficient: 2.53e+03*  
*Value: clade20C*

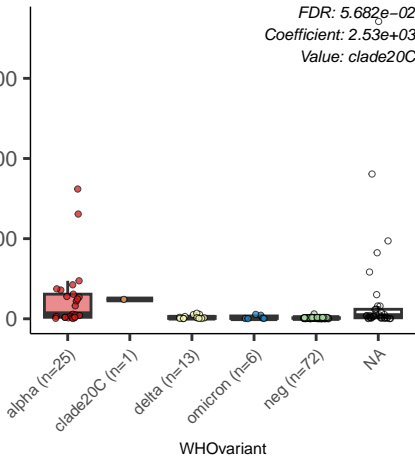

ia.c\_\_Gammaproteobacteria.o\_\_Pasteurellales.f\_\_Pasteurellaceae.

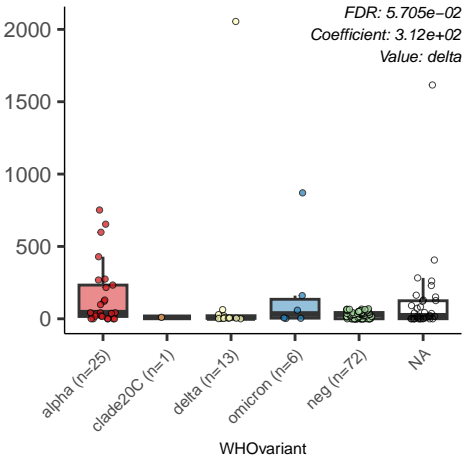

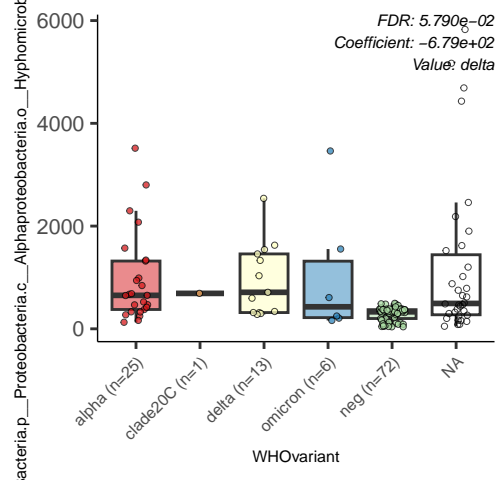

\_\_Epsilonproteobacteria.o\_\_Campylobacteriales.f\_\_Campylobacter

FDR:  $5.817e-02$   
Coefficient:  $-6.42e+03$   
Value: clade20C

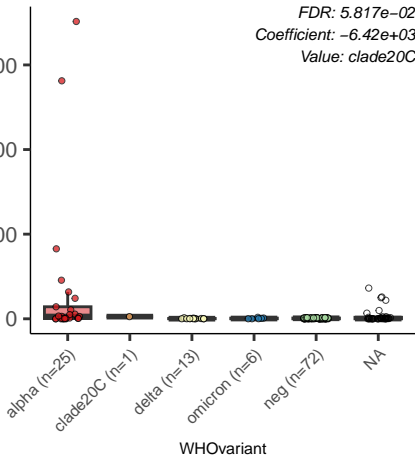

eria.p\_\_Proteobacteria.c\_\_Gammaproteobacteria.o\_\_Oceanospirilla

FDR:  $5.825e-02$   
Coefficient:  $-7.16e+01$   
Value: neg

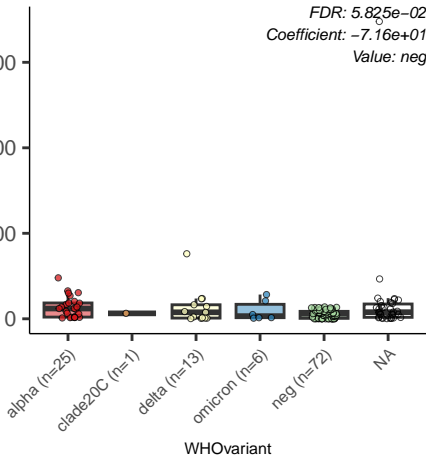

d\_Bacteria.p\_Synergistetes

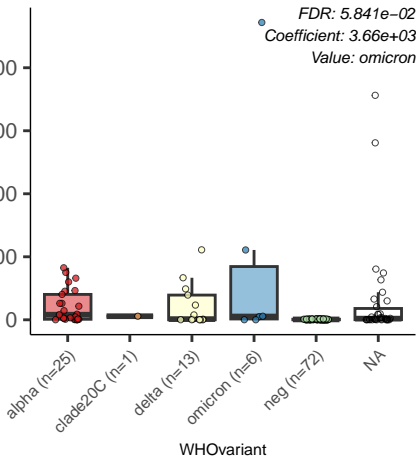



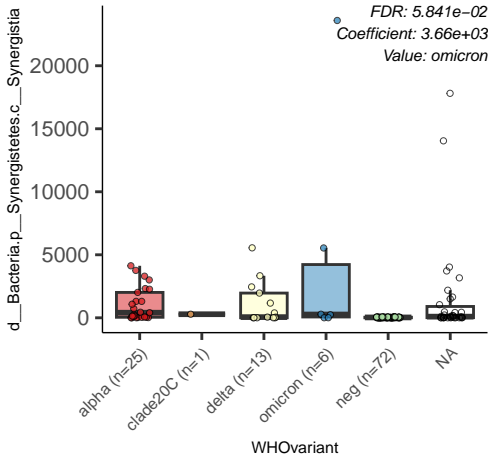

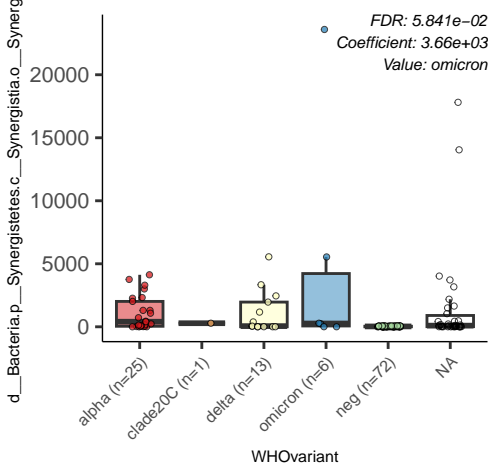

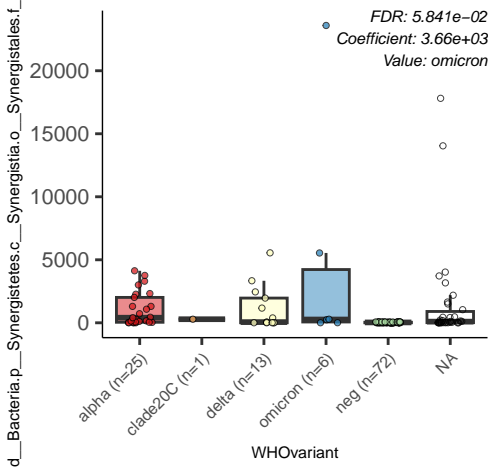

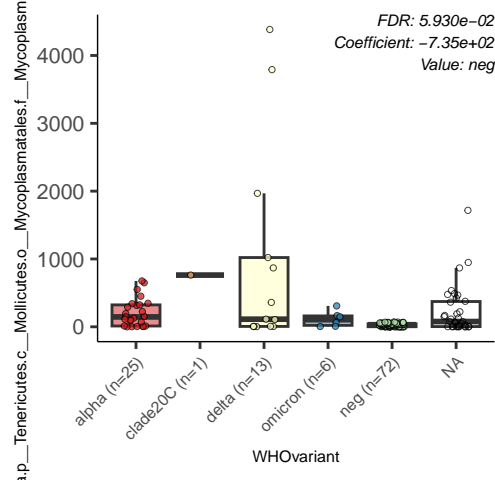

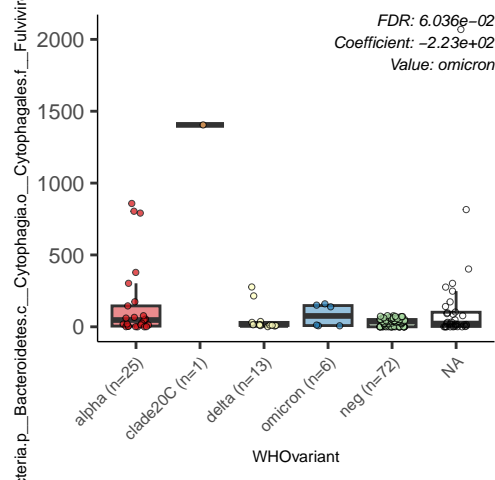

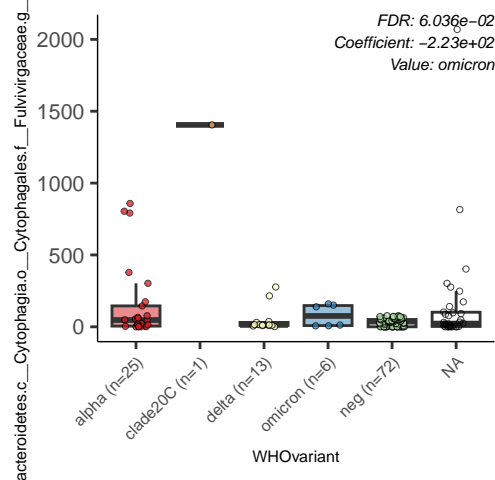



d\_Bacteria.p\_Actinobacteria.c\_Actinomycetia.o\_Candidatus.N

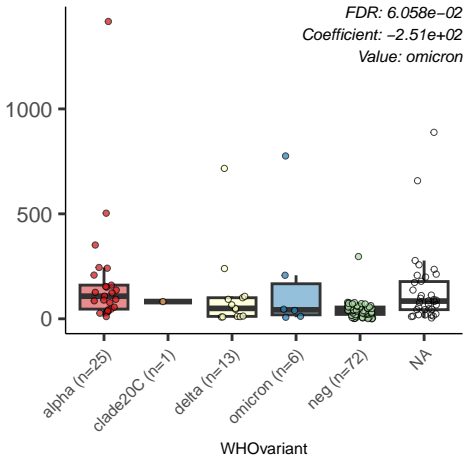



FDR:  $6.058e-02$   
Coefficient:  $-2.51e+02$   
Value: omicron

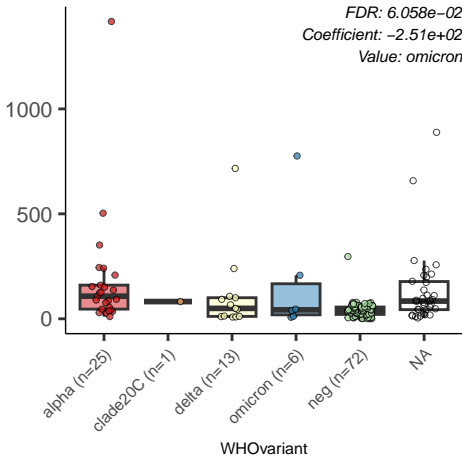

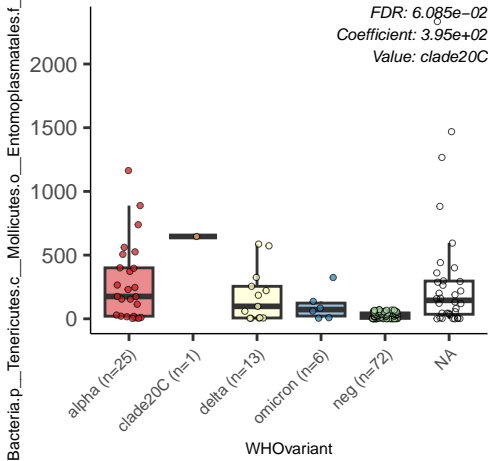

FDR:  $6.085e-02$   
Coefficient:  $3.95e+02$   
Value: clade20C

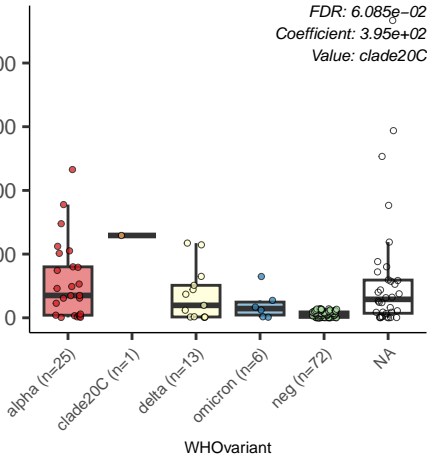

bacteria.c\_Actinomycetia.o\_Actinomycetales.f\_Actinomycetaceae

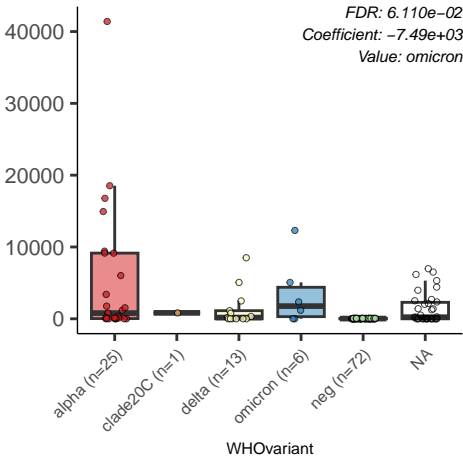

d\_Bacteria.p\_Actinobacteria.c\_Actinomycetia.o\_Micrococcales

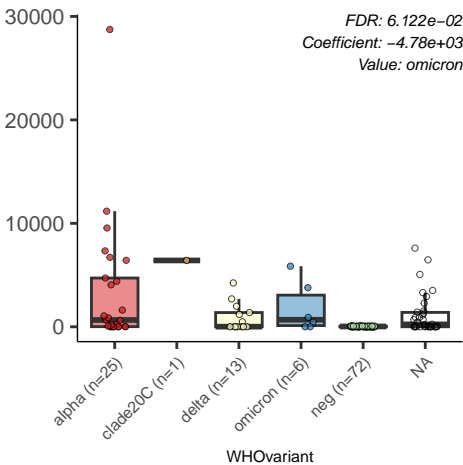

bacteria.p\_Actinobacteria.c\_Actinomycetia.o\_Micrococcales.f\_Jo

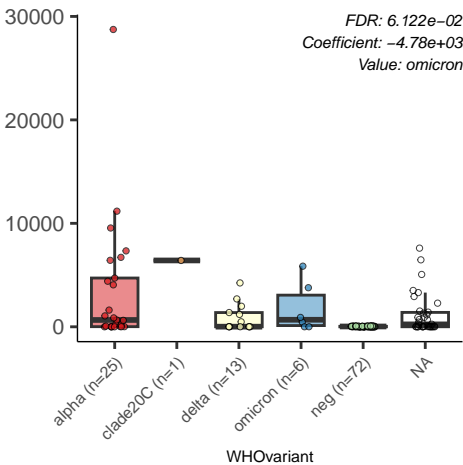

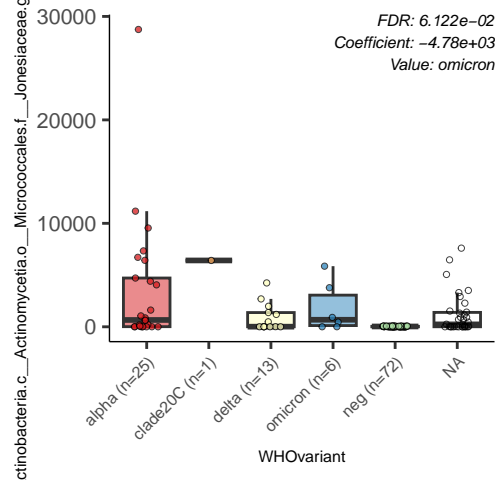

Bacteria.p\_Firmicutes.c\_Bacilli.o\_Lactobacillales.f\_Aerococcca

FDR:  $6.166e-02$   
Coefficient:  $5.23e+02$   
Value: clade20C

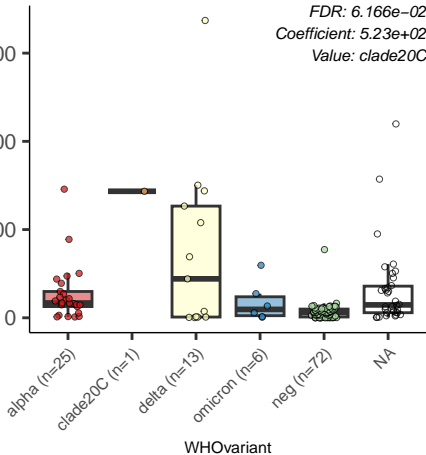



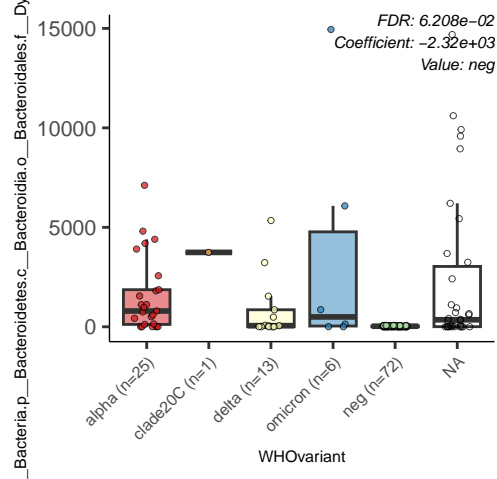

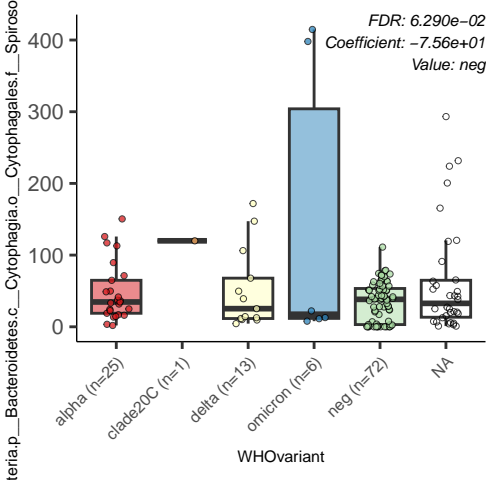

d\_\_Bacteria.p\_\_Proteobacteria.c\_\_Alphaproteobacteria.o\_\_Sphingomonadaceae

75000

50000

25000

alpha (n=25)

clade20C (n=1)

delta (n=13)

omicron (n=6)

neg (n=72)

NA

WHOvariant

FDR: 6.292e-02

Coefficient: -1.89e+04

Value: omicron

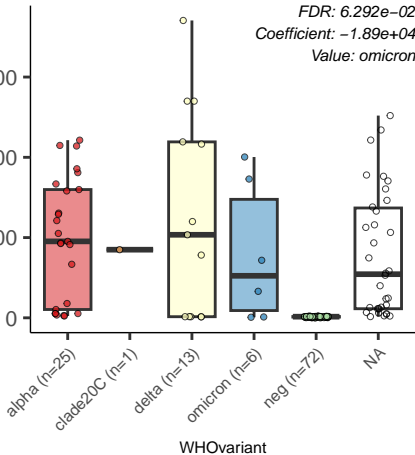

eria.p\_Actinobacteria.c\_Actinomycetia.o\_Corynebacteriales.f\_G

FDR:  $6.296e-02$   
Coefficient:  $-1.34e+02$   
Value: omicron

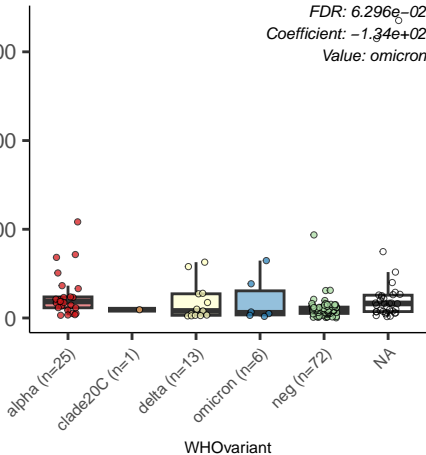

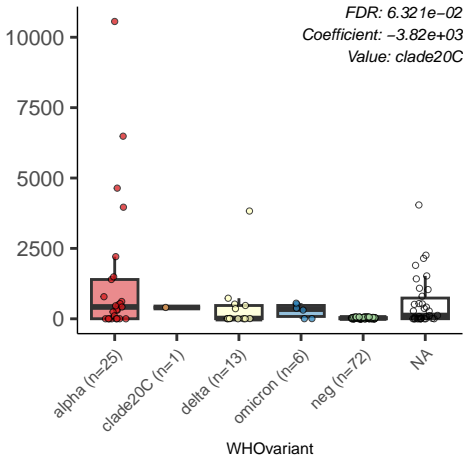

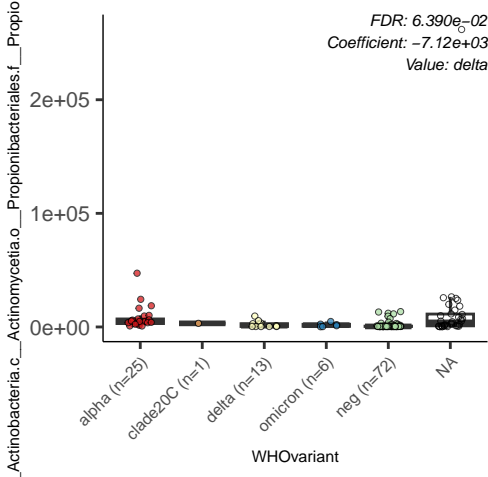

d\_Bacteria.p\_\_Nitrospirae

FDR:  $6.429e-02$   
Coefficient:  $-3.24e+02$   
Value: neg

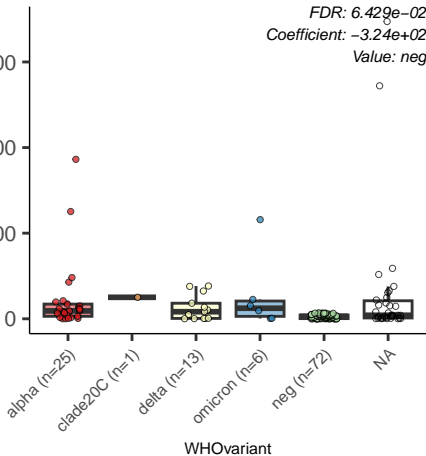

d\_\_Bacteria.p\_\_Bacteroidetes.c\_\_Sphingobacteriia

FDR:  $6.429 \times 10^{-2}$   
Coefficient:  $4.34 \times 10^3$   
Value: clade20C

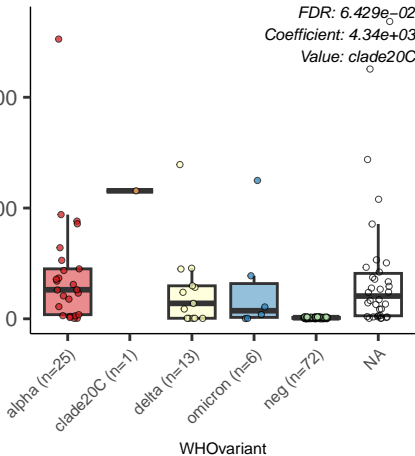



d\_\_Bacteria.p\_\_Bacteroidetes.c\_\_Sphingobacteriia.o\_\_Sphing

FDR:  $6.429e-02$   
Coefficient:  $4.34e+03$   
Value: clade20C

10000

5000

alpha (n=25)

clade20C (n=1)

delta (n=13)

omicron (n=6)

neg (n=72)

NA

WHOvariant

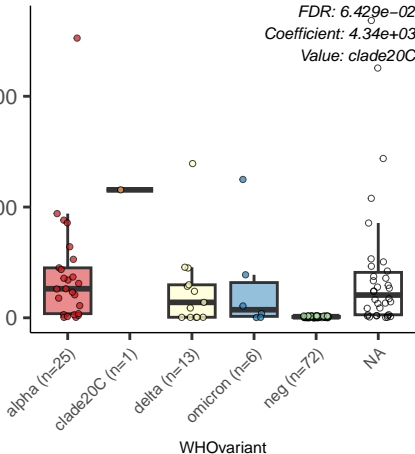

acteria.p\_\_Bacteroidetes.c\_\_Sphingobacteriia.o\_\_Sphingobacteriales

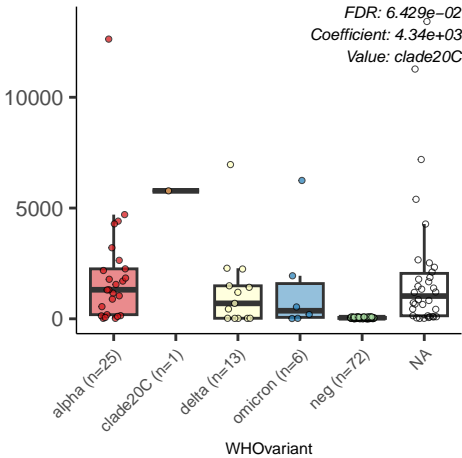

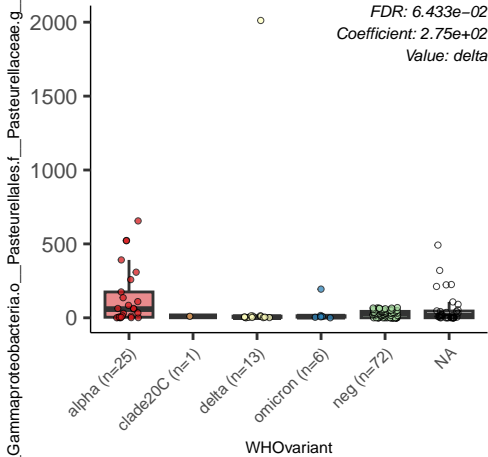

stridia.o\_Thermoanaerobacterales.f\_Thermoanaerobacterales.Fa

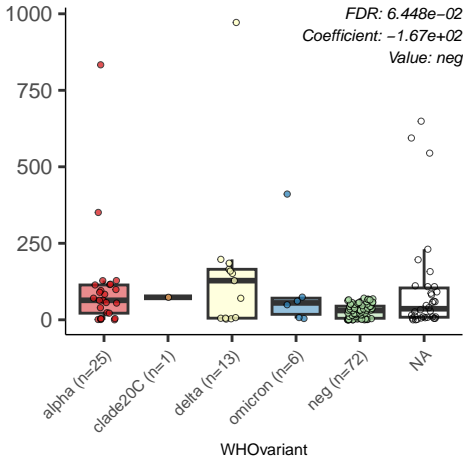

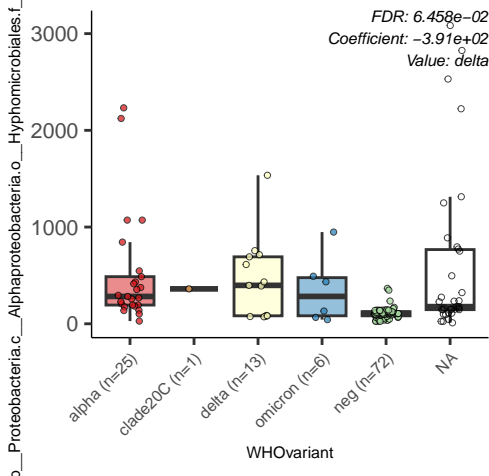

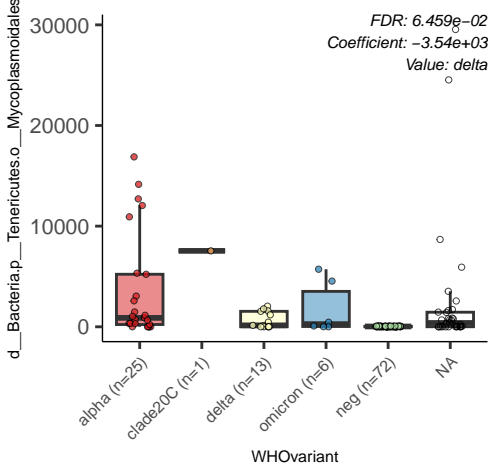

terial.p\_\_Planctomycetes.c\_\_Planctomycetia.o\_\_Pirellulales.f\_\_Lacip

FDR:  $6.465e-02$   
Coefficient:  $-4.37e+02$   
Value: neg

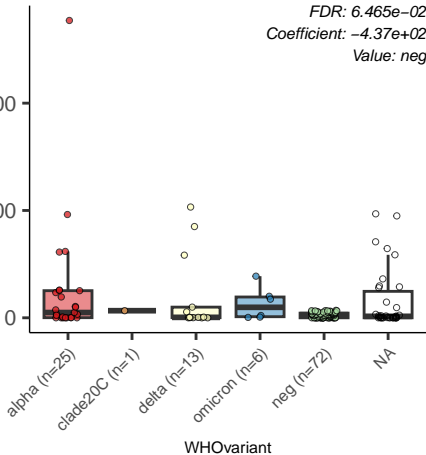

ntomycetes.c\_\_Planctomycetia.o\_\_Pirellulales.f\_\_Lacipirellulaceae

FDR:  $6.465e-02$   
Coefficient:  $-4.37e+02$   
Value: neg

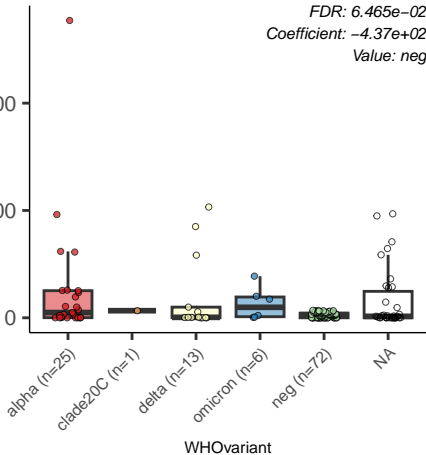



d\_\_Bacteria.p\_\_Tenericutes.o\_\_Mycoplasmoidales.f\_\_Metamycoc

FDR: 6.475e-02  
Coefficient: -3.52e+03  
Value: delta

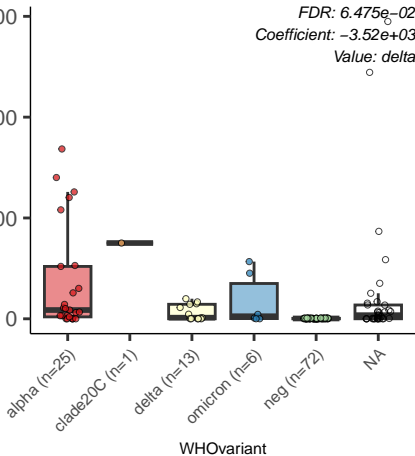

eria.p\_\_Tenericutes.o\_\_Mycoplasmoidales.f\_\_Metamycoplasmatac

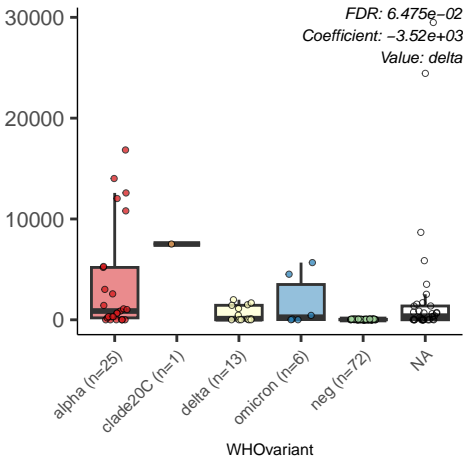

ria.p\_\_Proteobacteria.c\_\_Betaproteobacteria.o\_\_Burkholderiales.g

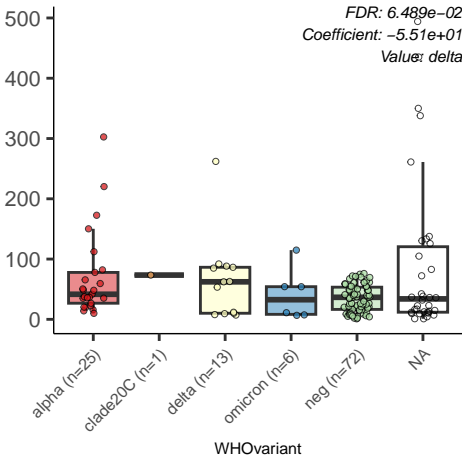

ia.c\_\_Betaproteobacteria.o\_\_Burkholderiales.g\_\_Candidatus.Lichthys

FDR:  $6.489e-02$   
Coefficient:  $-5.51e+01$   
Value: delta

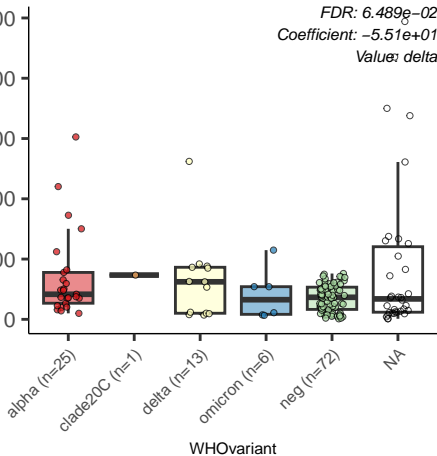

Bacteria.p\_Actinobacteria.c\_Actinomycetia.o\_Corynebacteriale

FDR:  $6.497e-02$   
Coefficient:  $-1.33e+02$   
Value: omicron

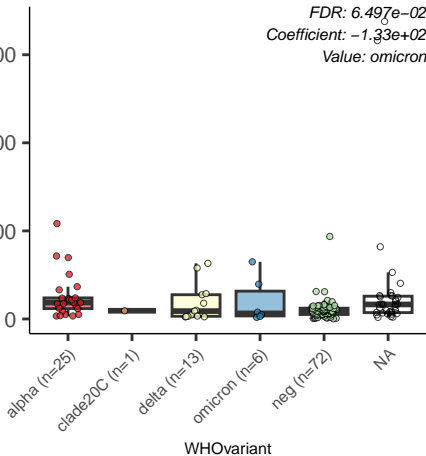

Proteobacteria.c\_\_Alphaproteobacteria.o\_\_Hyphomicrobiales.f\_\_Xa

FDR:  $6.499\text{e-}02$   
Coefficient:  $-8.53\text{e}+01$   
Value: neg

1000  
500  
0

alpha (n=25)

clade20C (n=1)

delta (n=13)

omicron (n=6)

neg (n=72)

NA

WHOvariant

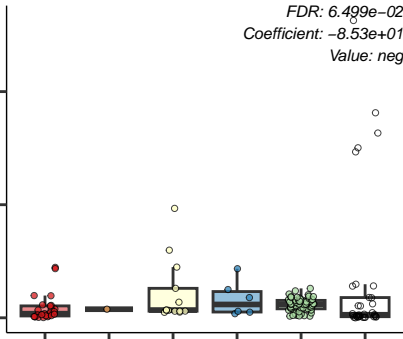

c\_\_Alphaproteobacteria.o\_\_Hyphomicrobiales.f\_\_Xanthobacteraceae

FDR:  $6.499e-02$   
Coefficient:  $-8.53e+01$   
Value: neg

1000

500

0

alpha (n=25)

clade20C (n=1)

delta (n=13)

omicron (n=6)

neg (n=72)

NA

WHOvariant

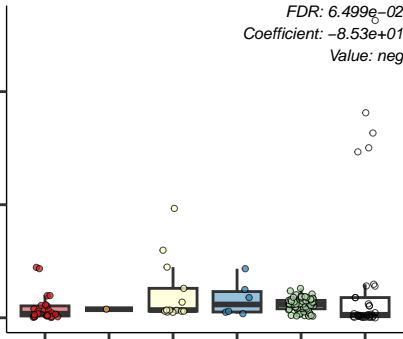

obacteria.c\_\_Betaproteobacteria.o\_\_Neisseriales.f\_\_Neisseriaceae

FDR:  $6.501e-02$   
Coefficient:  $-5.38e+03$   
Value: neg

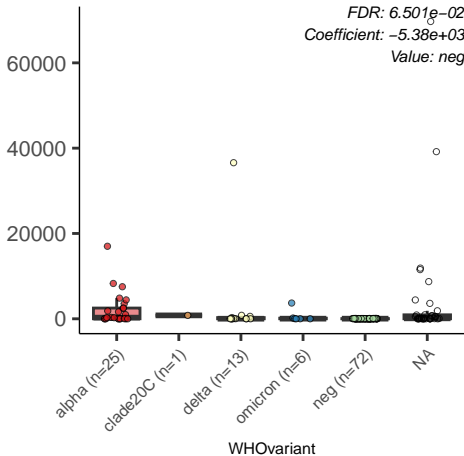



bacteria.p\_\_Firmicutes.c\_\_Tissierellia.o\_\_Tissierellales.f\_\_Peptoniph

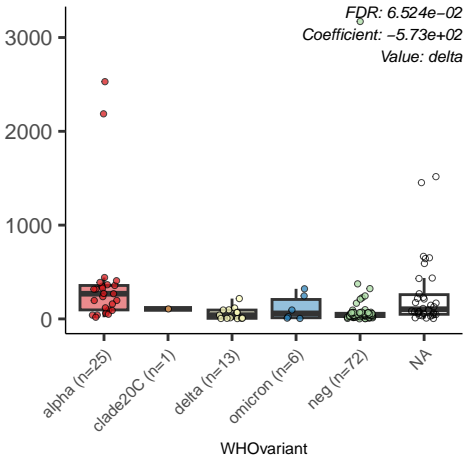

Firmicutes.c\_\_Tissierellia.o\_\_Tissierellales.f\_\_Peptoniphilaceae.g

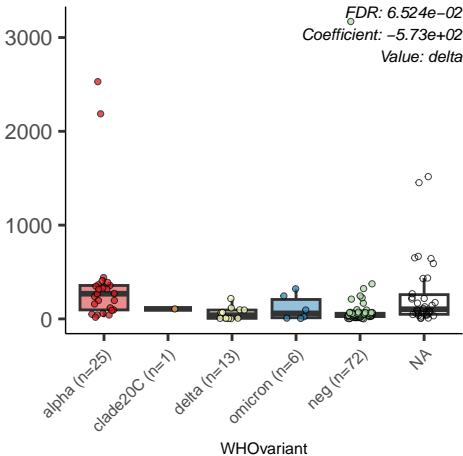

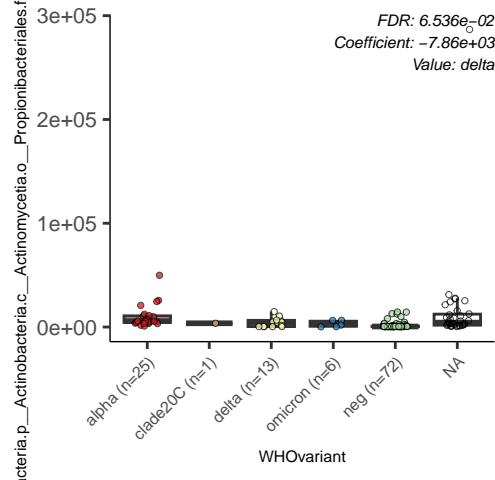

d\_\_Bacteria.p\_\_Candidatus.Saccharibacteria.c\_\_Candidatus.Sa

FDR:  $6.580e-02$   
Coefficient:  $-1.14e+05$   
Value: delta

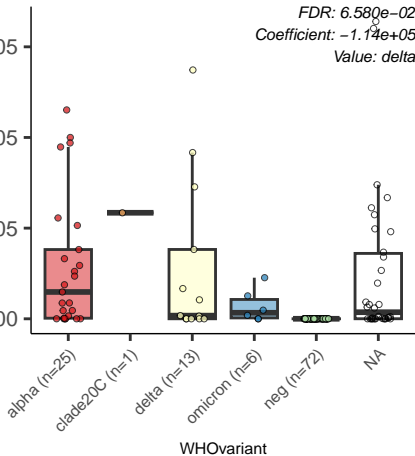

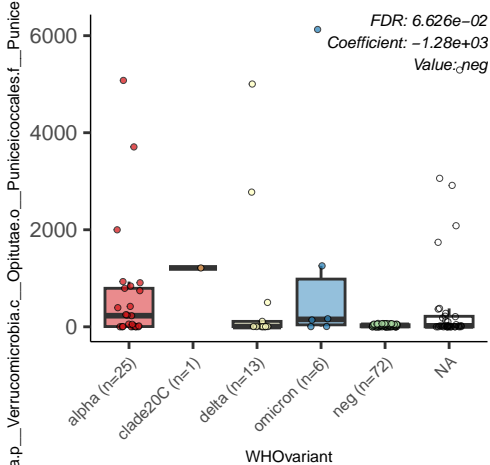

comicrobia.c\_\_Opitutae.o\_\_Puniceicoccales.f\_\_Puniceicoccaceae.g

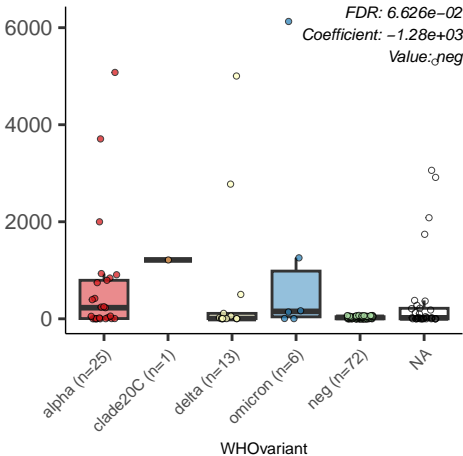

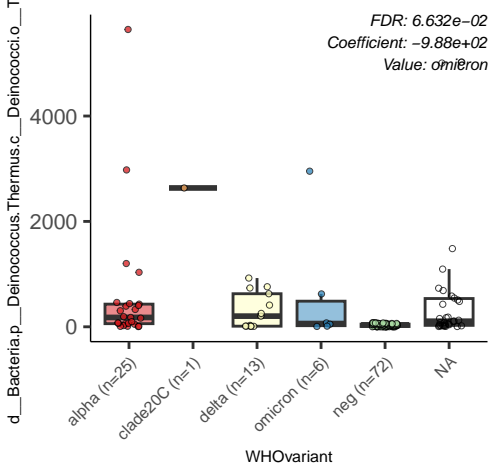

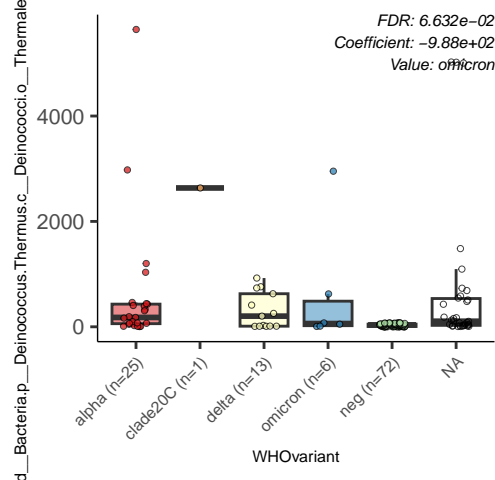



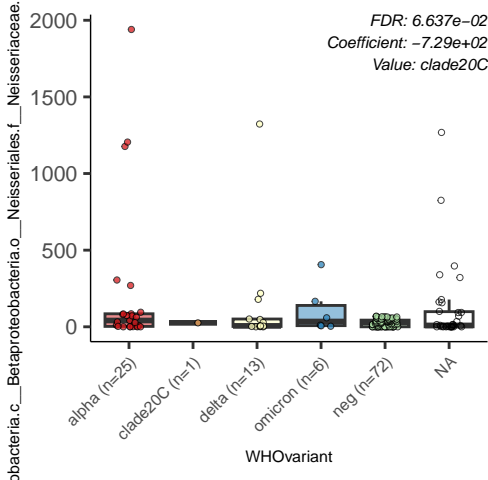

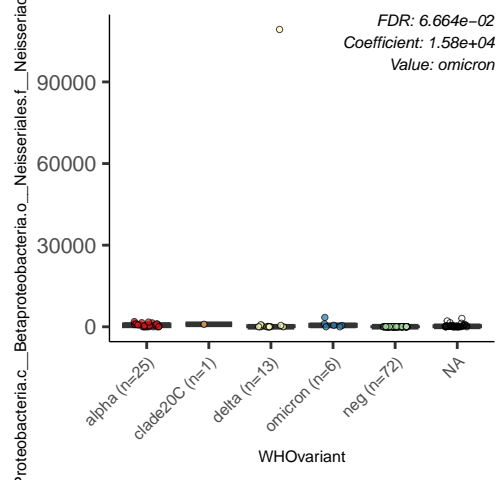

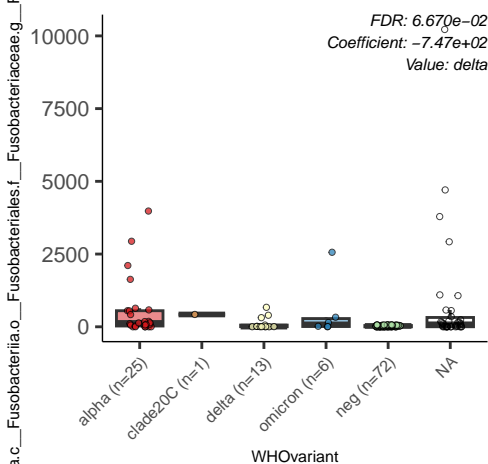

acteria.p\_\_Actinobacteria.c\_\_Actinomycetia.o\_\_Corynebacteriales.f

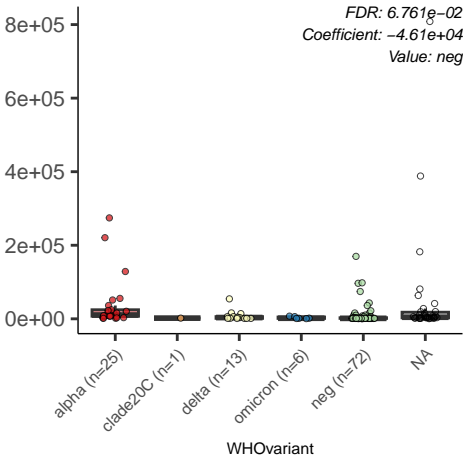

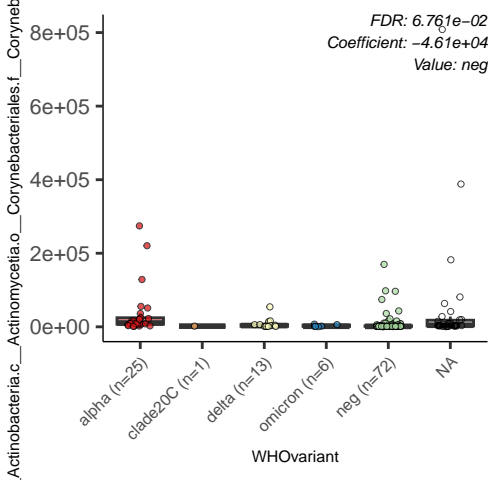

icutes.c\_\_Bacilli.o\_\_Lactobacillales.f\_\_Streptococcaceae.g\_\_Streptococcus

FDR:  $6.777 \times 10^{-2}$   
Coefficient:  $7.36 \times 10^3$   
Value: omicron

1e+05

5e+04

0e+00

alpha (n=25)

clade20C (n=1)

delta (n=13)

omicron (n=6)

neg (n=72)

NA

WHOvariant

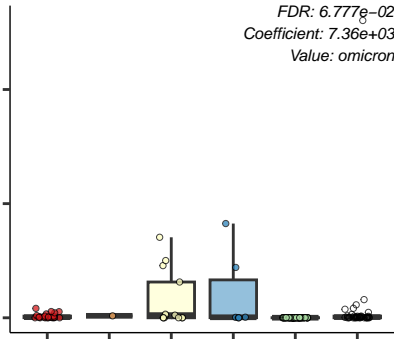

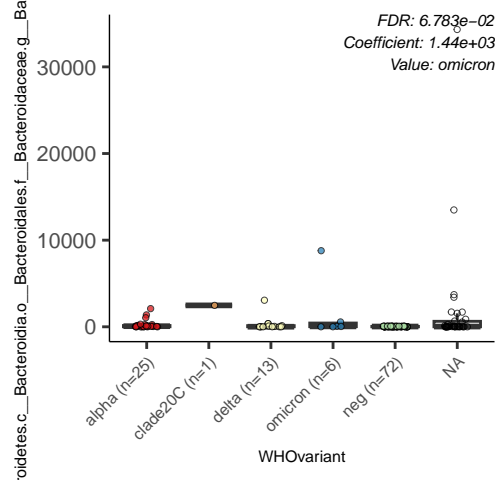

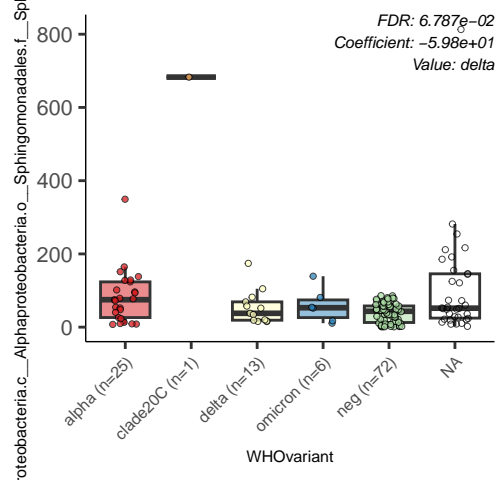



utes.c\_\_Clostridia.o\_\_Eubacteriales.f\_\_Lachnospiraceae.g\_\_Anaeroc

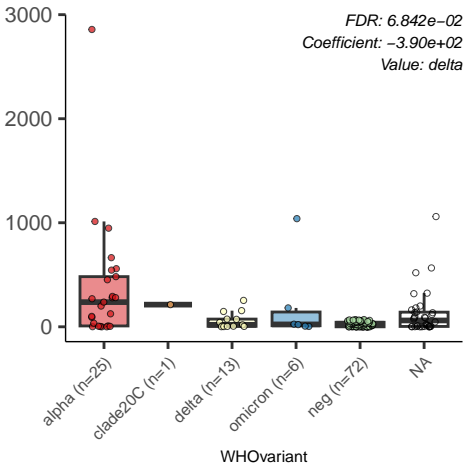

Firmicutes.c\_\_Clostridia.o\_\_Eubacteriales.f\_\_Lachnospiraceae.g\_\_B

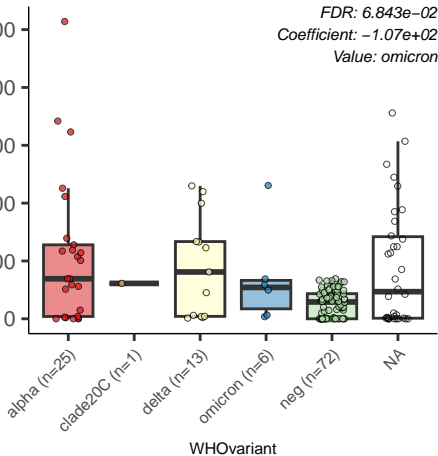

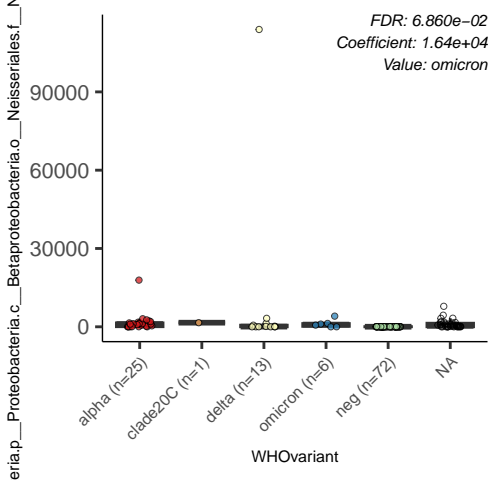

Neisseria.c\_\_Betaproteobacteria.o\_\_Neisseriales.f\_\_Neisseriaceae

FDR:  $6.880e-02$   
Coefficient:  $-1.79e+03$   
Value: neg

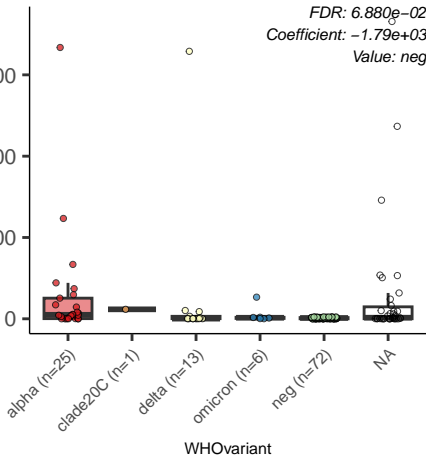

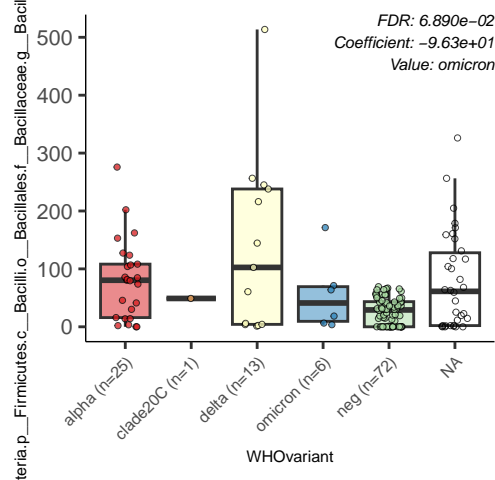

micutes.c\_\_Bacilli.o\_\_Lactobacillales.f\_\_Lactobacillaceae.g\_\_Lactila

FDR:  $6.914e-02$   
Coefficient:  $-1.18e+02$   
Value: neg

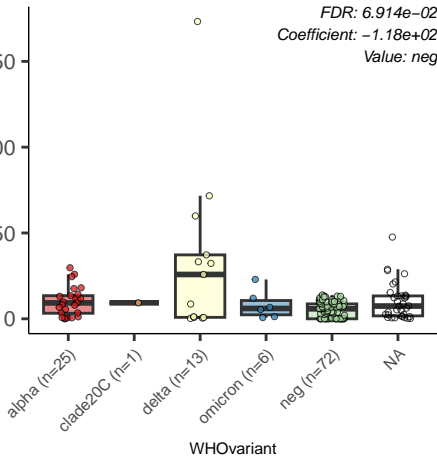

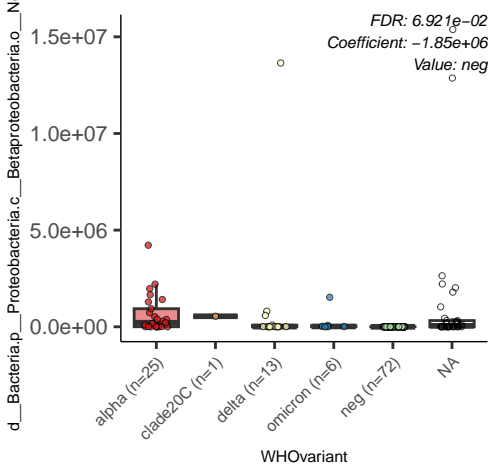

cteria.p\_\_Firmicutes.c\_\_Tissierellia.o\_\_Tissierellales.f\_\_Peptoniph

$FDR: 6.929e-02$   
 $Coefficient: -8.02e+02$   
 $Value: delta$

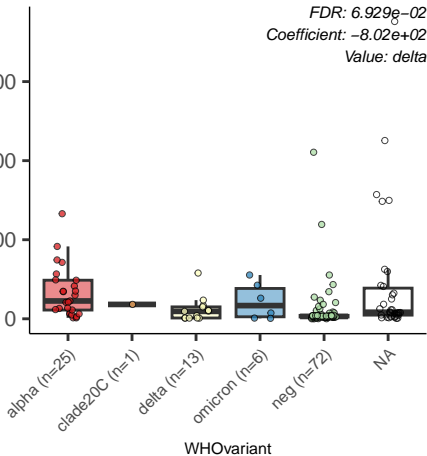



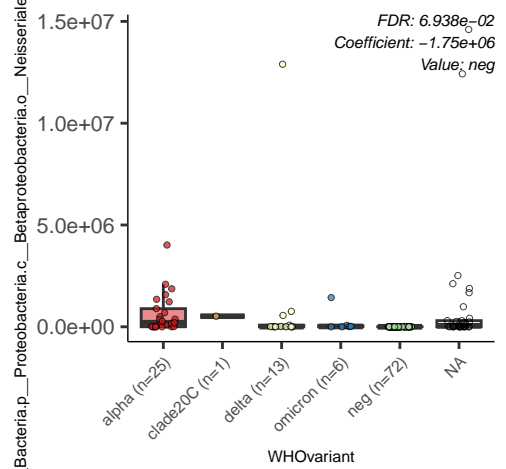

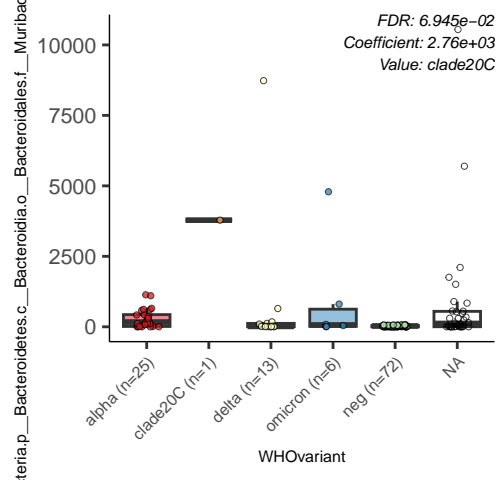

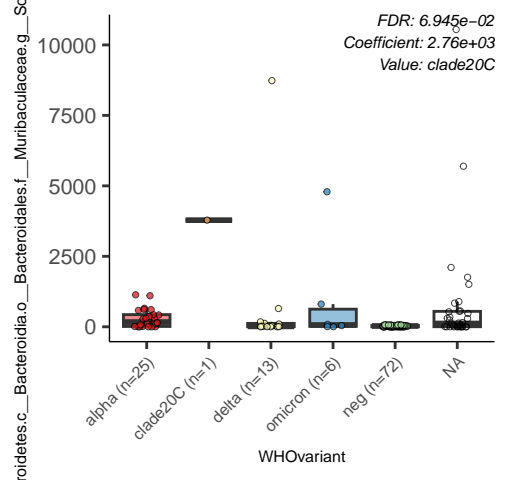

icutes.c\_\_Bacilli.o\_\_Lactobacillales.f\_\_Streptococcaceae.g\_\_Streptococcus

*FDR: 6.968e-02*  
*Coefficient: 1.97e+03*  
*Value: delta*

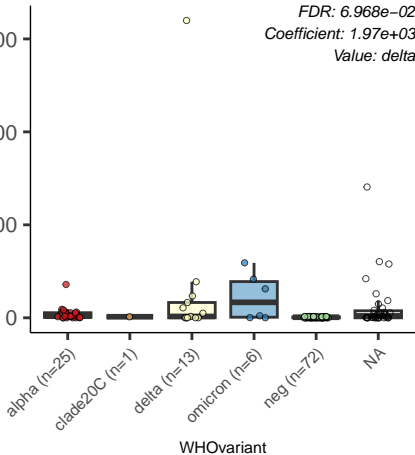

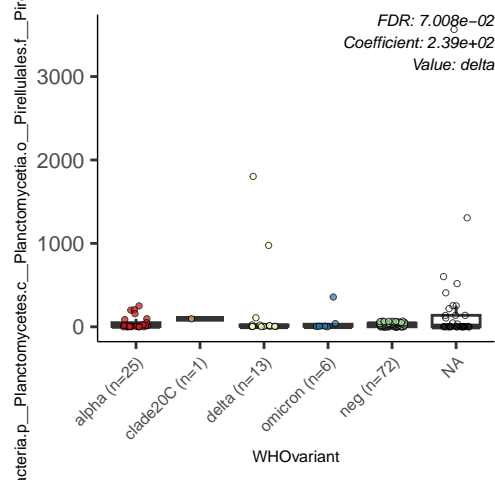

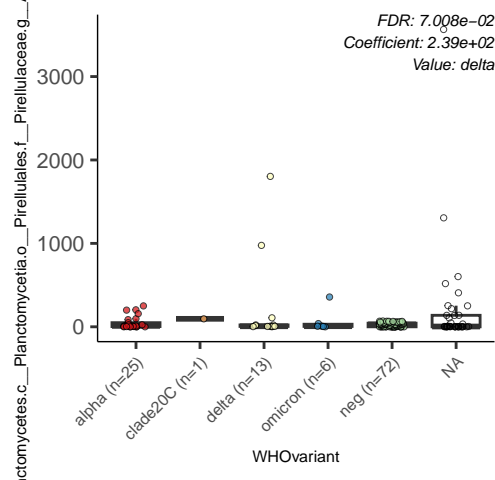

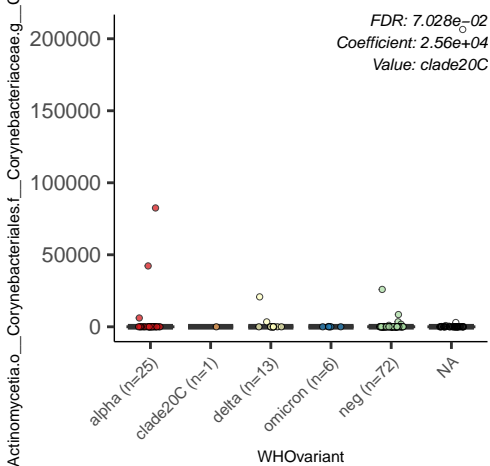

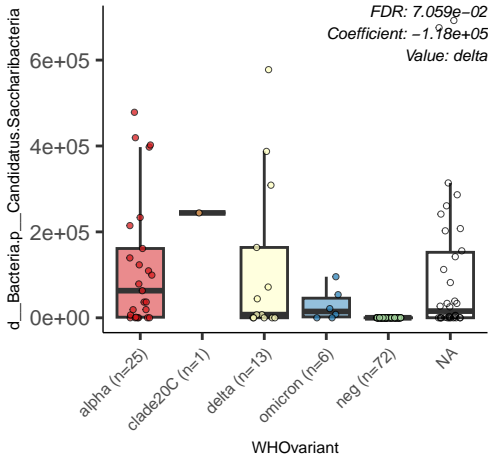



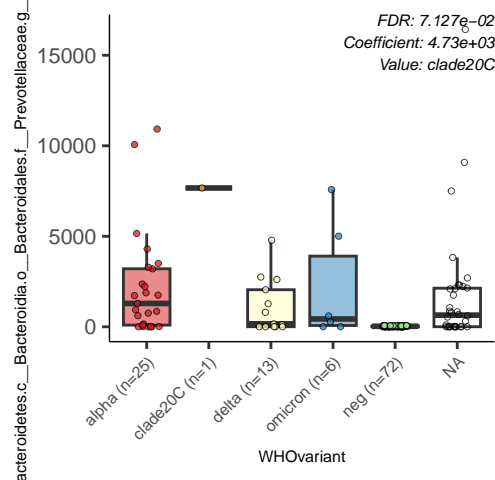

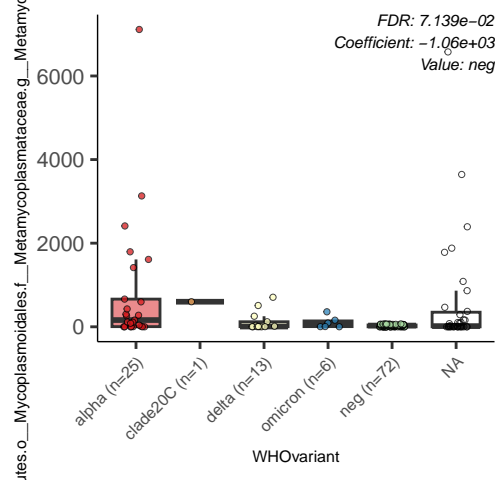

bacteria.p\_\_Proteobacteria.c\_\_Betaproteobacteria.o\_\_Burkholderiales

FDR:  $7.143e-02$   
Coefficient:  $-3.46e+04$   
Value: neg

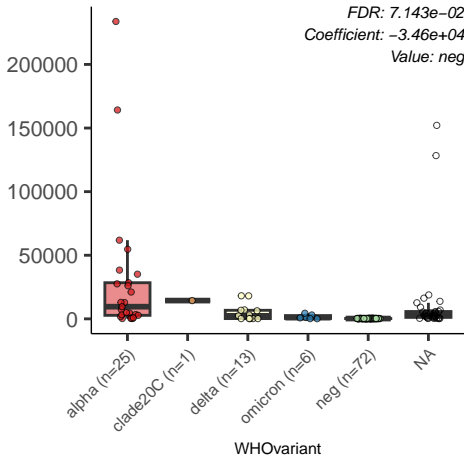

icutes.c\_\_Bacilli.o\_\_Lactobacillales.f\_\_Streptococcaceae.g\_\_Streptococcus

*FDR: 7.144e-02*  
*Coefficient: 2.49e+03*  
*Value: delta*

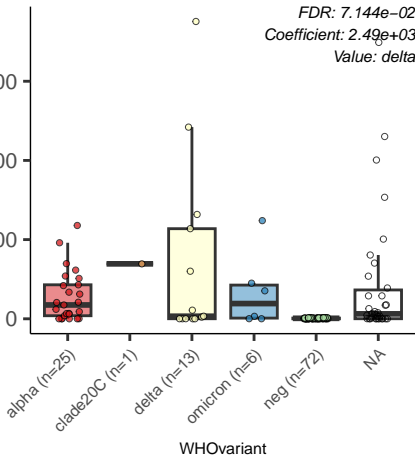

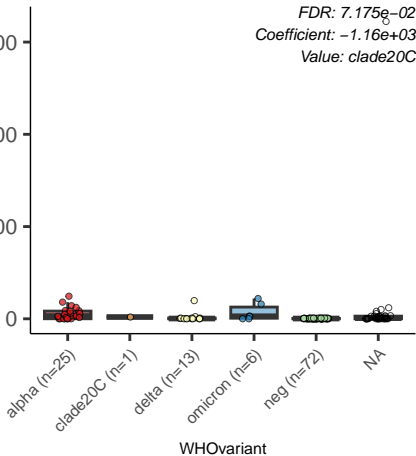

Clostridia.o\_\_Eubacteriales.f\_\_Christensenellaceae.g\_\_Christens

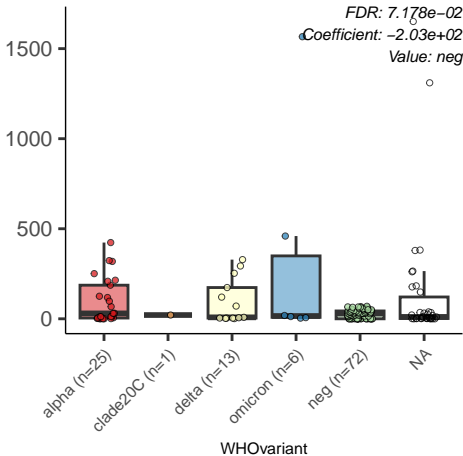

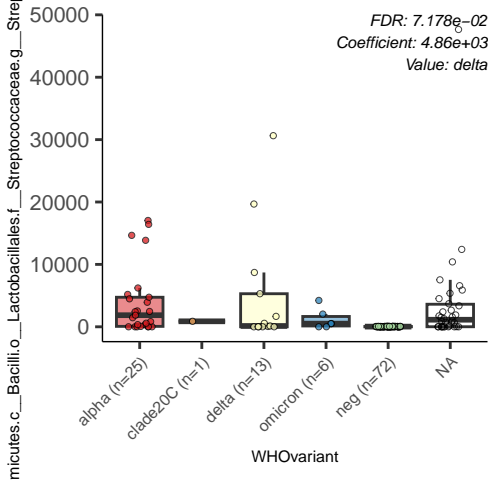

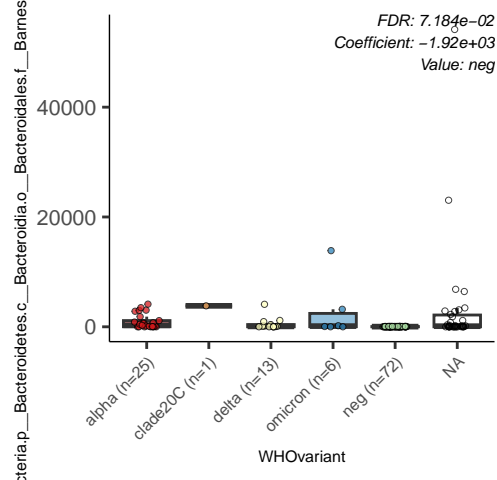



teroidetes.c\_\_Bacteroidia.o\_\_Bacteroidales.f\_\_Barnesiellaceae.g

FDR: 7.184e-02  
Coefficient: -1.92e+03  
Value: neg

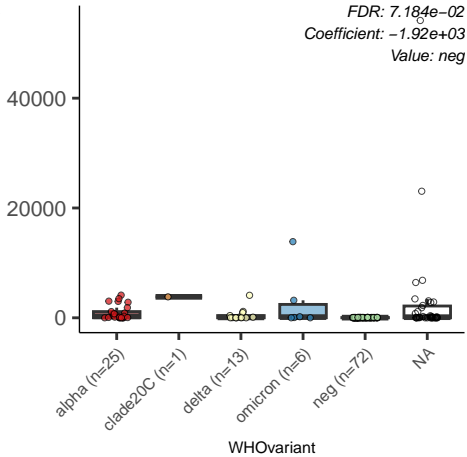

ia.p\_Actinobacteria.c\_Actinomycetia.o\_Micrococcales.f\_Intras

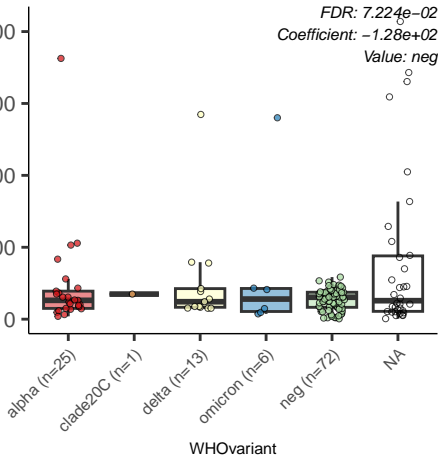

ia.p\_\_Bacteroidetes.c\_\_Bacteroidia.o\_\_Bacteroidales.f\_\_Dysgonor

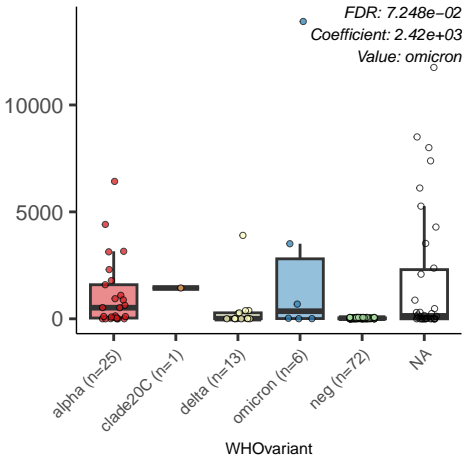

roidetes.c\_\_Bacteroidia.o\_\_Bacteroidales.f\_\_Dysgonomonadaceae

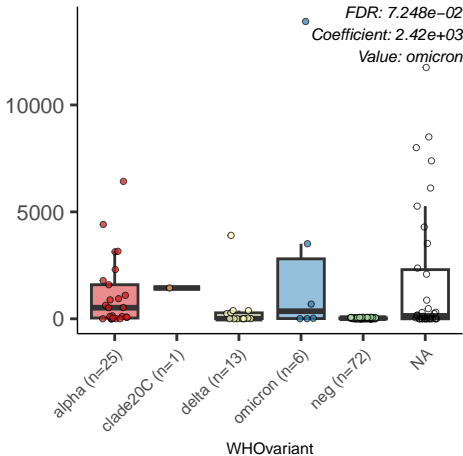

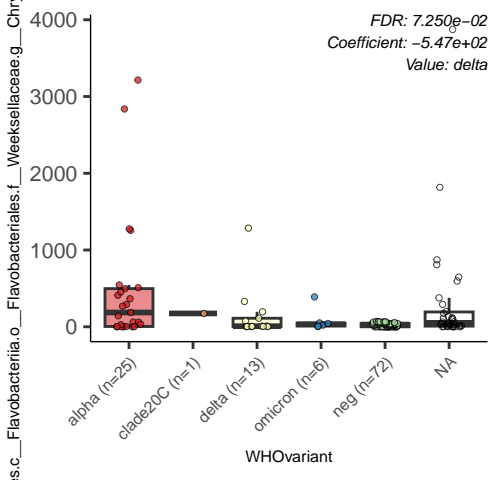

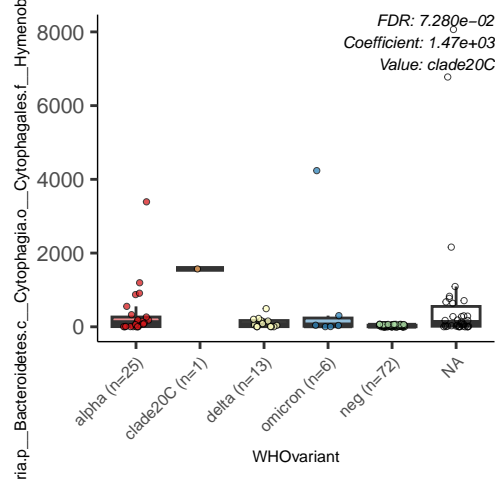

detes.c\_\_Bacteroidia.o\_\_Bacteroidales.f\_\_Tannerellaceae.g\_\_Parat

FDR:  $7.286e-02$   
Coefficient:  $2.65e+03$   
Value: omicron

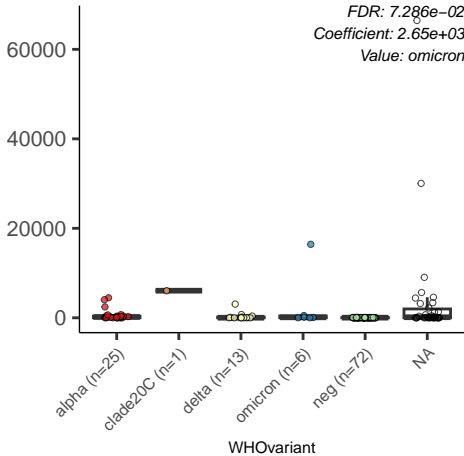

Bacteroidetes.c\_\_Bacteroidia.o\_\_Bacteroidales.f\_\_Prevotellaceae

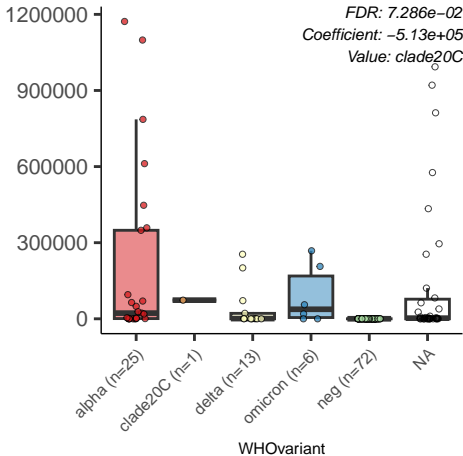



Bacteria.p\_Firmicutes.c\_Bacilli.o\_Lactobacillales.f\_Enterococce

FDR: 7.286e-02  
Coefficient: 3.39e+02  
Value: delta

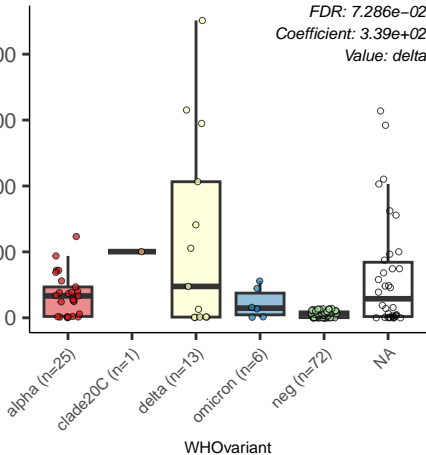

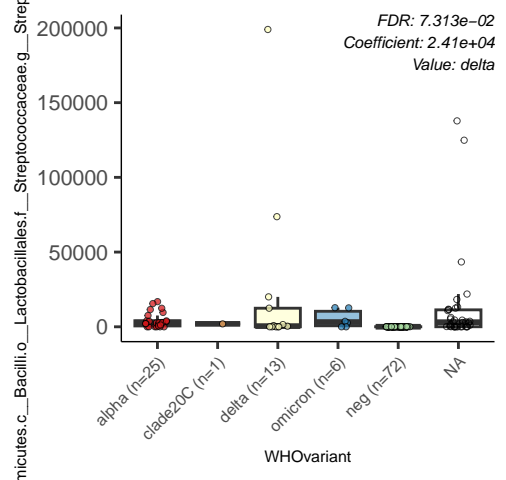

Actinomycetia.o\_\_Corynebacteriales.f\_\_Corynebacteriaceae.g\_\_C

FDR:  $7.317e-02$   
Coefficient:  $-5.04e+03$   
Value: omicron

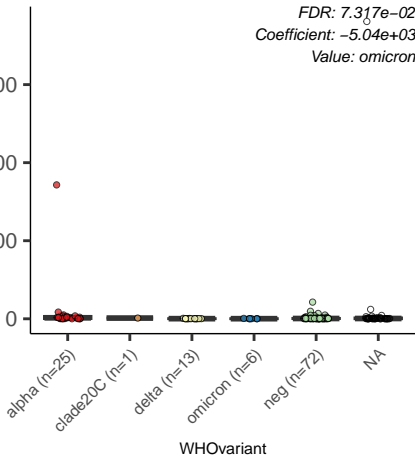

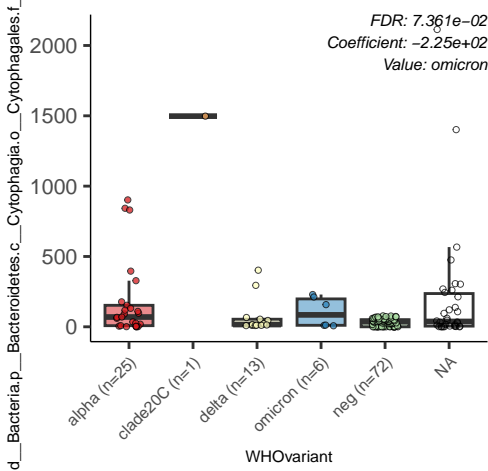

l.p\_\_Firmicutes.c\_\_Erysipelotrichia.o\_\_Erysipelotrichales.f\_\_Erysipe

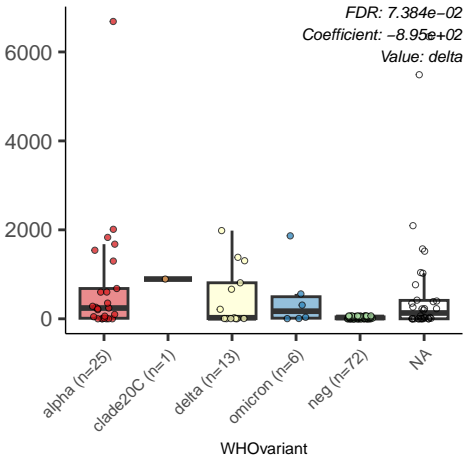

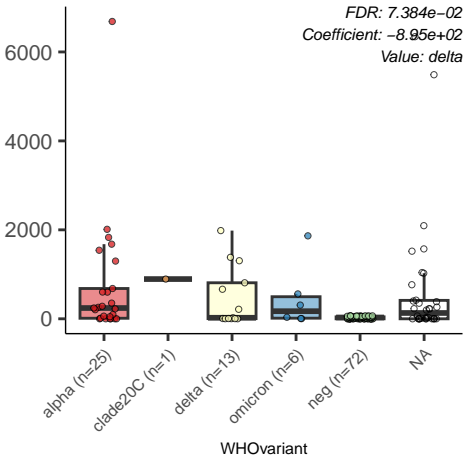

bacteria.c\_Actinomycetia.o\_Actinomycetales.f\_Actinomycetaceae

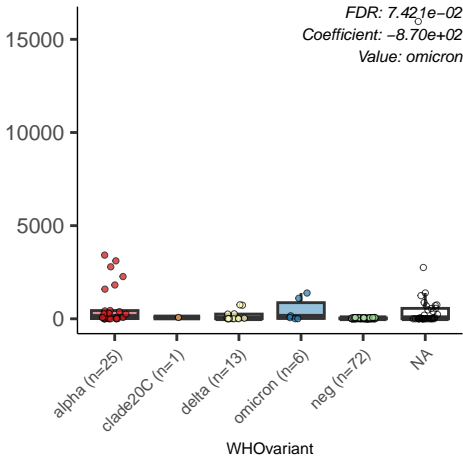

cteria.p\_\_Firmicutes.c\_\_Bacilli.o\_\_Bacillales.f\_\_Bacillaceae.g\_\_Bac

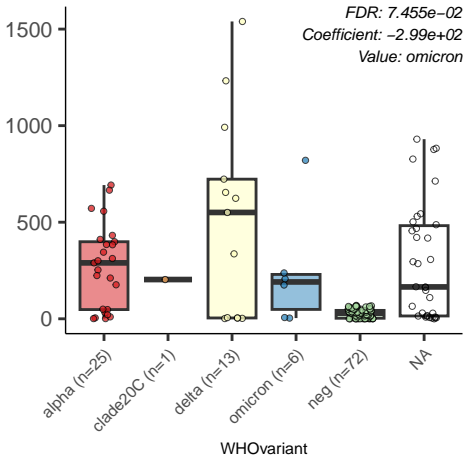



acteria.p\_\_Firmicutes.c\_\_Bacilli.o\_\_Lactobacillales.f\_\_Enterococcca

FDR:  $7.455e-02$   
Coefficient:  $-1.85e+03$   
Value: omicron

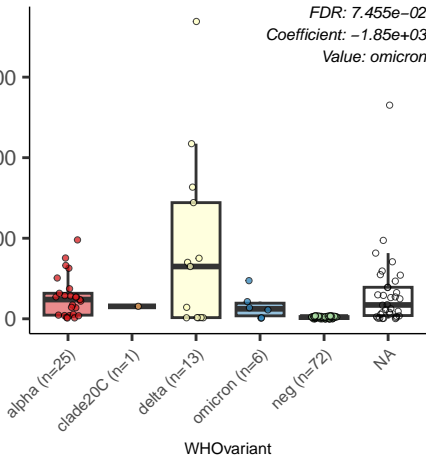

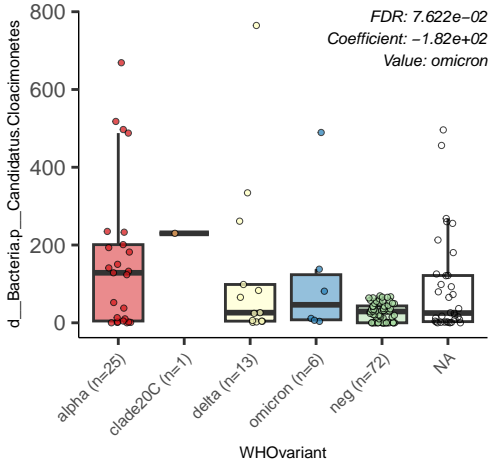

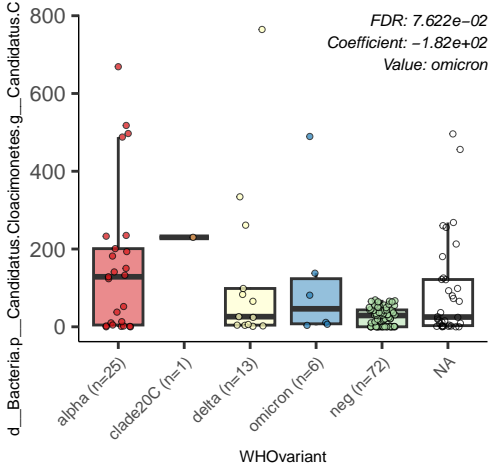

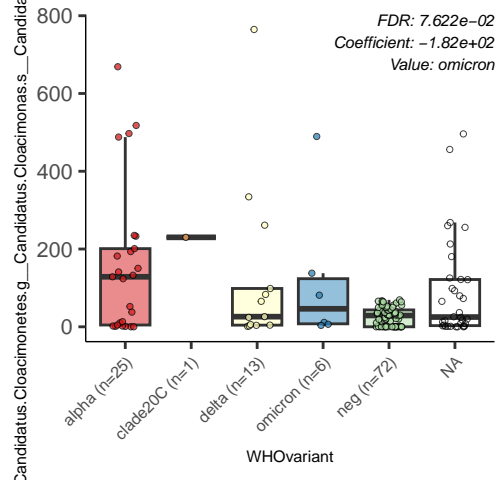

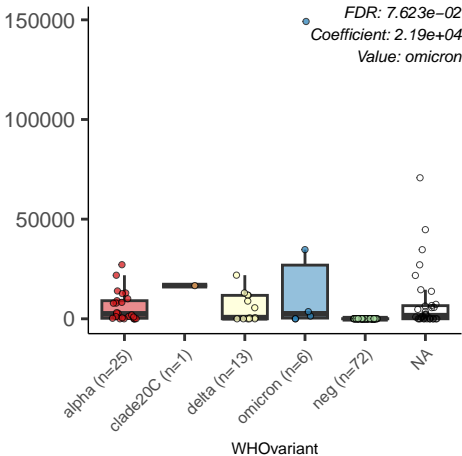

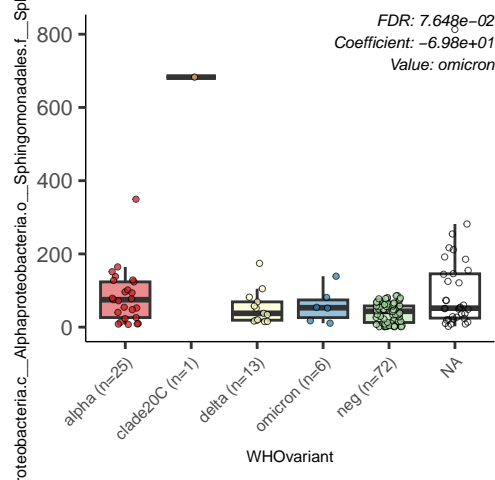

obacteria.c\_\_Fusobacteriia.o\_\_Fusobacteriales.f\_\_Leptotrichiaceae

FDR:  $7.672e-02$   
Coefficient:  $-2.12e+05$   
Value: clade20C

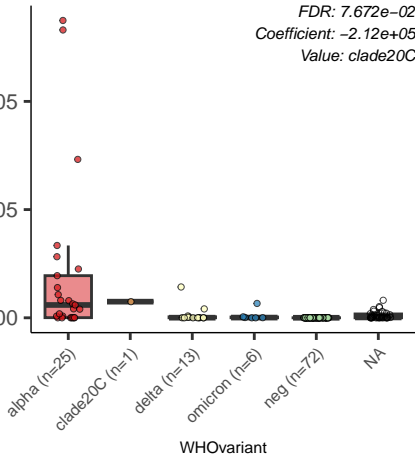

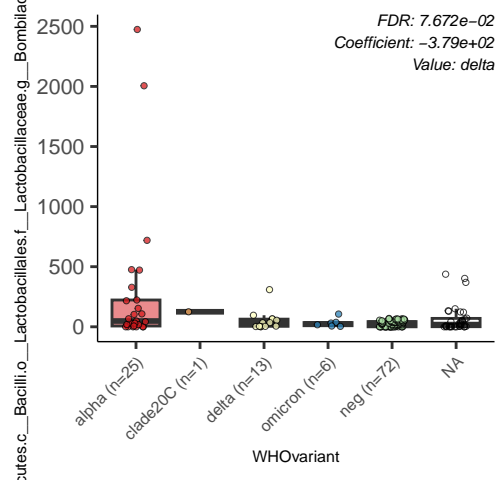



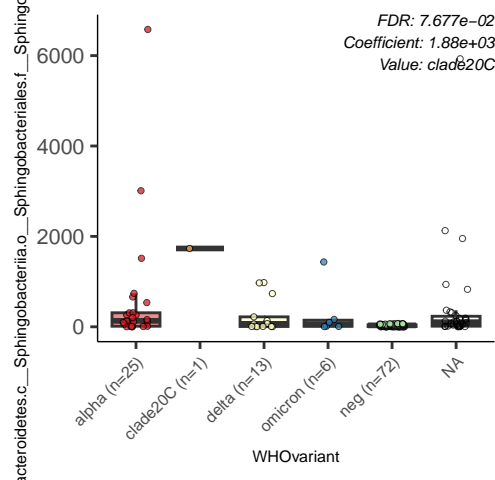

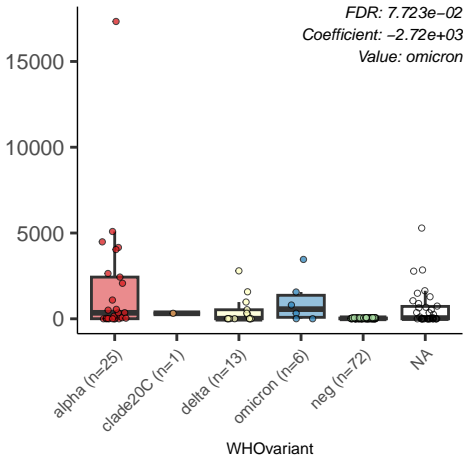

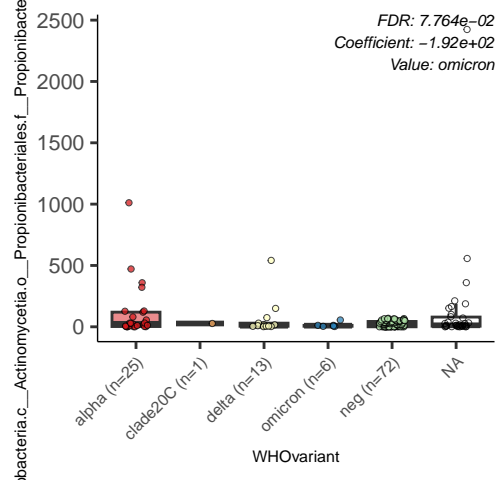

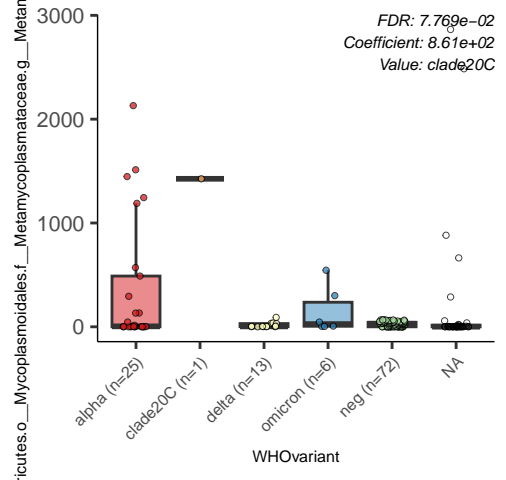

Proteobacteria.c\_\_Gammaproteobacteria.o\_\_Alteromonadales.f

FDR:  $7.894e-02$   
Coefficient:  $4.56e+02$   
Value: omicron

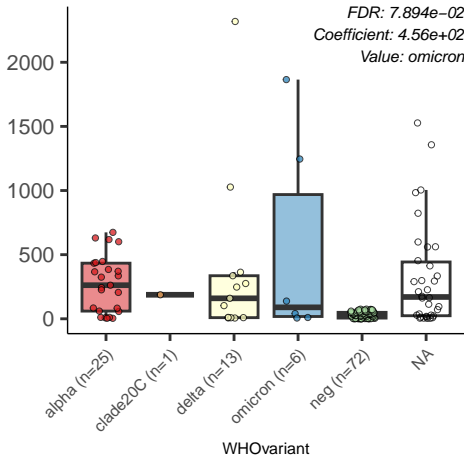

d\_Bacteria.p\_\_Nitrospirae.c\_\_Nitrospira

FDR:  $7.902e-02$   
Coefficient:  $-3.10e+02$   
Value: neg

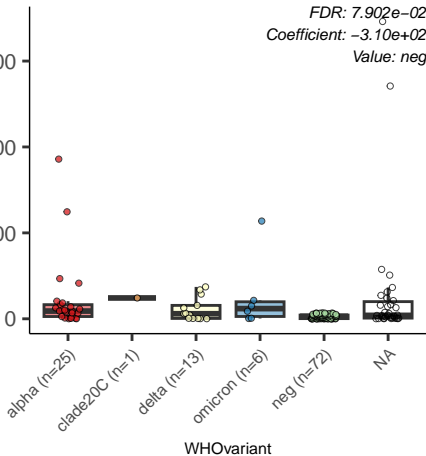

d\_\_Bacteria.p\_\_Nitrospirae.c\_\_Nitrospira.o\_\_Nitrospir

FDR:  $7.902e-02$   
Coefficient:  $-3.10e+02$   
Value: neg

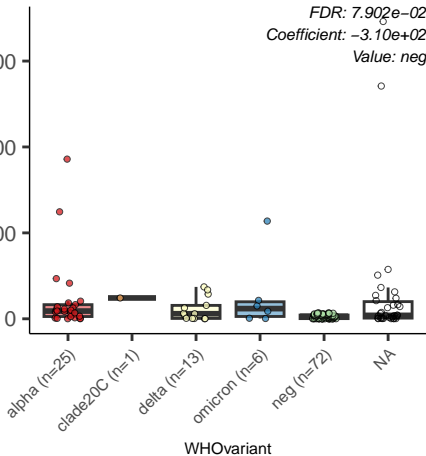

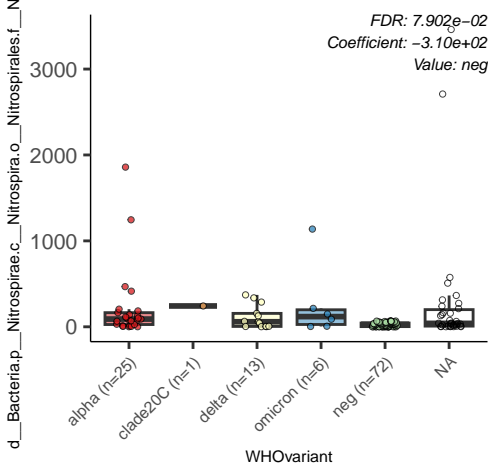



FDR:  $7.961e-02$   
 Coefficient:  $-2.53e+02$   
 Value: omicron

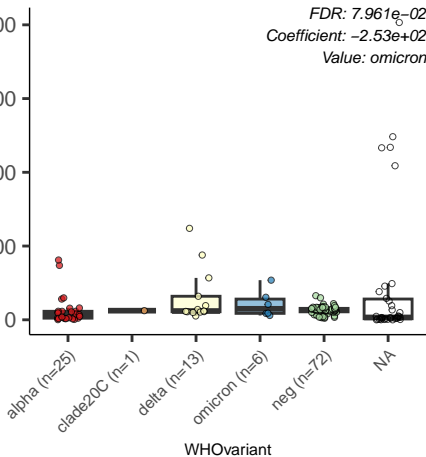

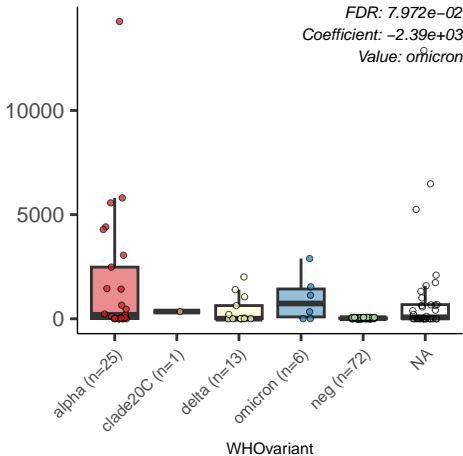

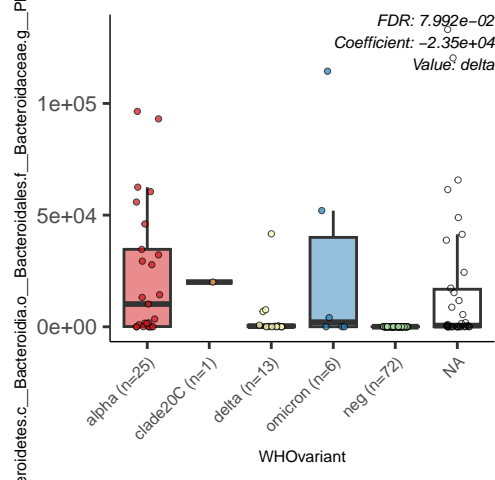

chaetes.c\_\_Spirochaetia.o\_\_Spirochaetales.f\_\_Treponemataceae.g

FDR:  $8.028e-02$   
Coefficient:  $-6.41e+02$   
Value: neg

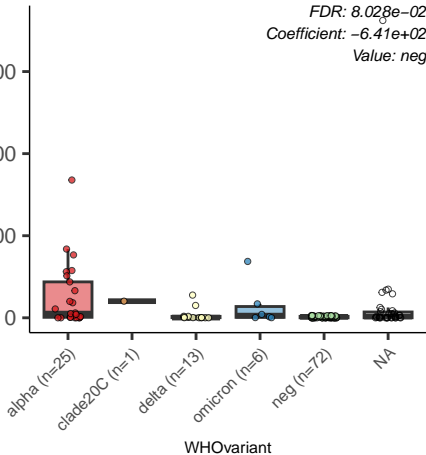

ia.p\_Actinobacteria.c\_Actinomycetia.o\_Actinomycetales.f\_Acti

FDR:  $8.028e-02$   
Coefficient:  $-3.77e+05$   
Value: delta

$2e+06$

$1e+06$

$0e+00$

alpha (n=25)

clade20C (n=1)

delta (n=13)

omicron (n=6)

neg (n=72)

NA

WHOvariant

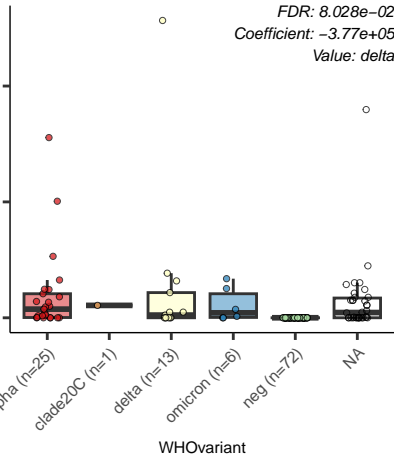

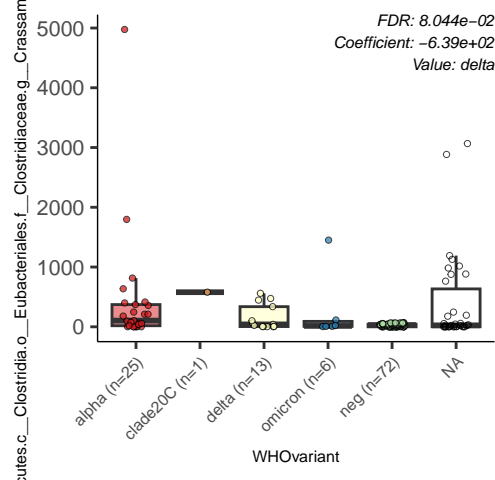

tes.c\_Flavobacteriia.o\_Flavobacteriales.f\_Weeksellaceae.g\_CH

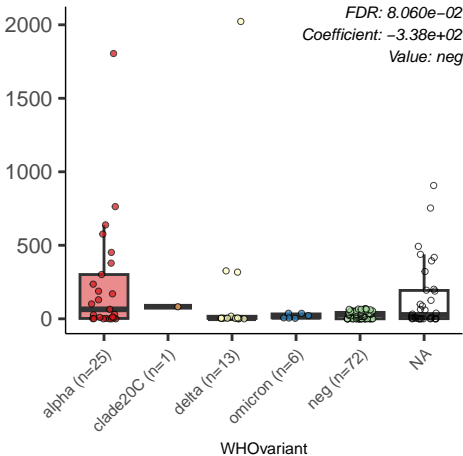

Negativicutes.o\_\_Selenomonadales.f\_\_Selenomonadaceae.g\_\_Se

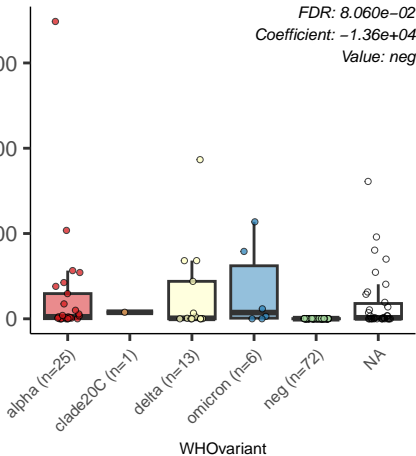



NA

FDR: 8.063e-02  
Coefficient: -1.42e+03  
Value: delta

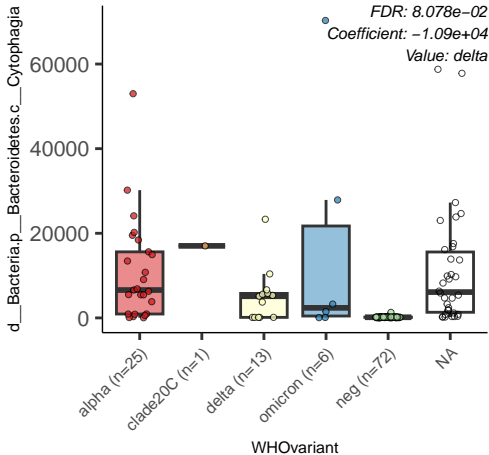

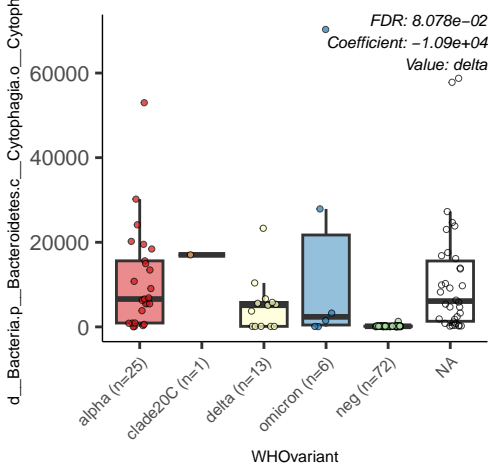

unicutes.c\_\_Negativicutes.o\_\_Veillonellales.f\_\_Veillonellaceae.g\_\_Me

*FDR: 8.092e-02*  
*Coefficient: -4.56e+03*  
*Value: delta*

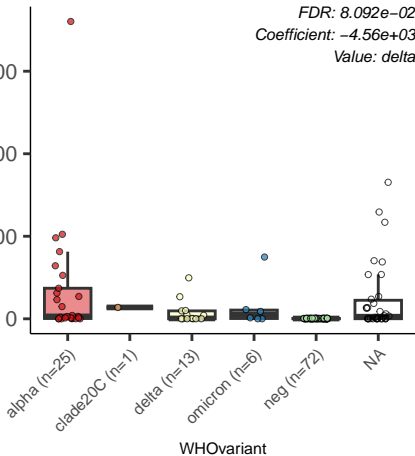

eria.c\_Actinomycetia.o\_Actinomycetales.f\_Actinomycetaceae.g

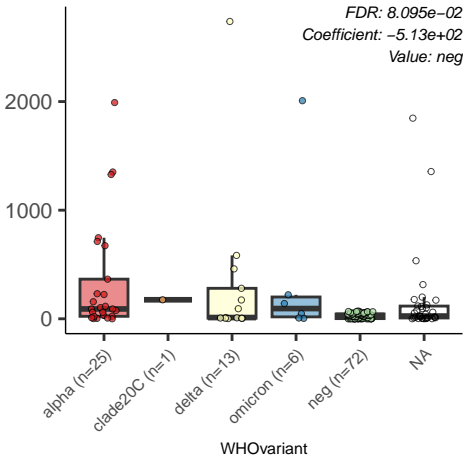

obacteria.c\_\_Betaproteobacteria.o\_\_Neisseriales.f\_\_Neisseriaceae.

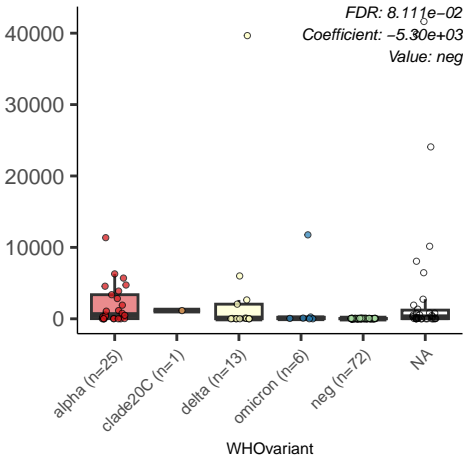

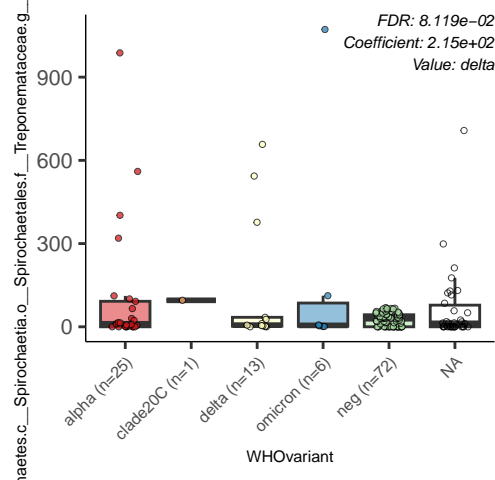

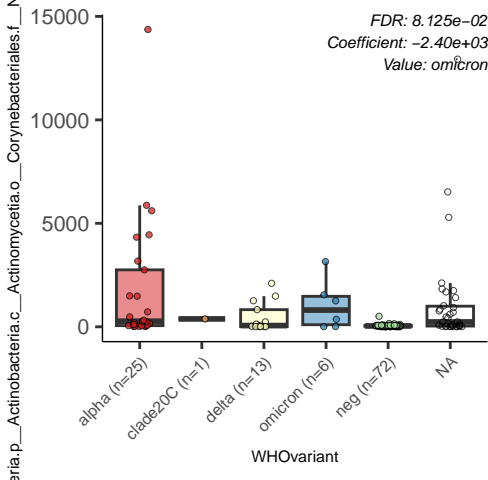



bacteria.p\_\_Firmicutes.c\_\_Clostridia.o\_\_Eubacteriales.f\_\_Eubacteri

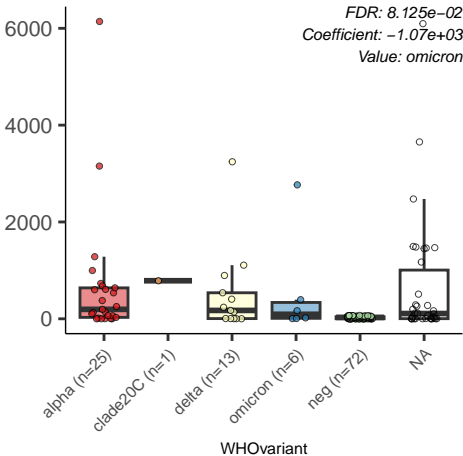

ria.p\_Actinobacteria.c\_Actinomycetia.o\_Micrococcales.f\_Micro

*FDR: 8.131e-02*  
*Coefficient: -1.65e+03*  
*Value: delta*

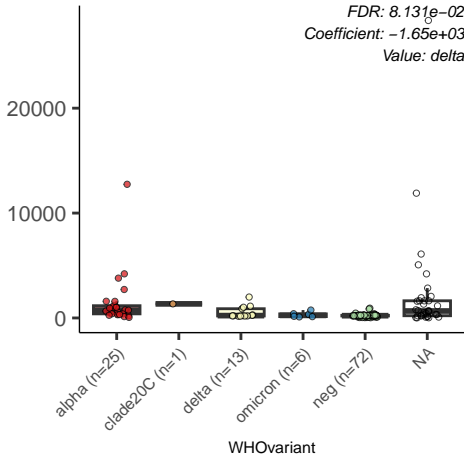

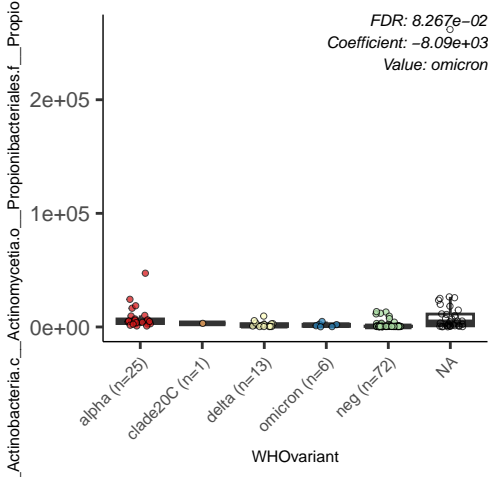

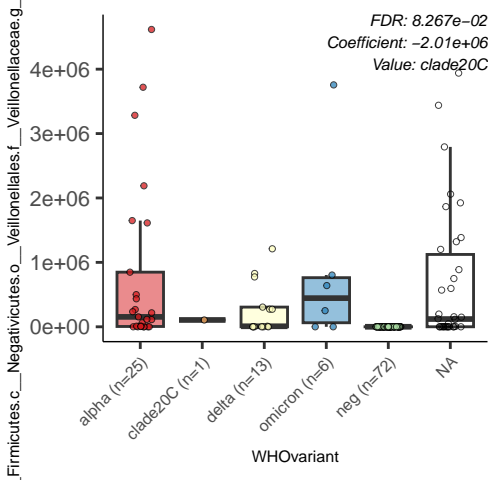

d\_Bacteria.p\_Proteobacteria

FDR: 8.287e-02  
Coefficient: 3.29e+06  
Value: delta

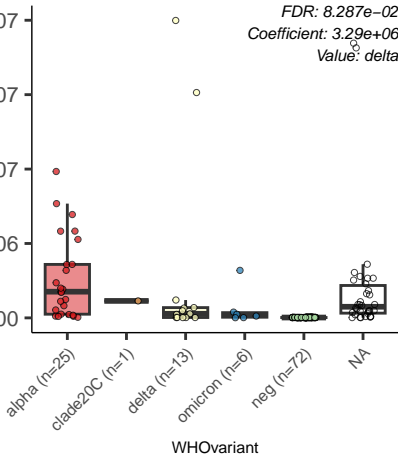

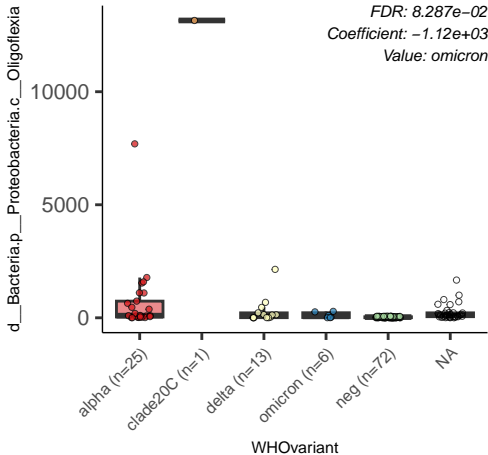

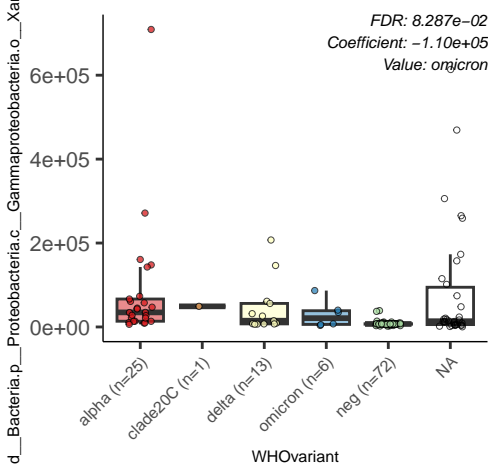

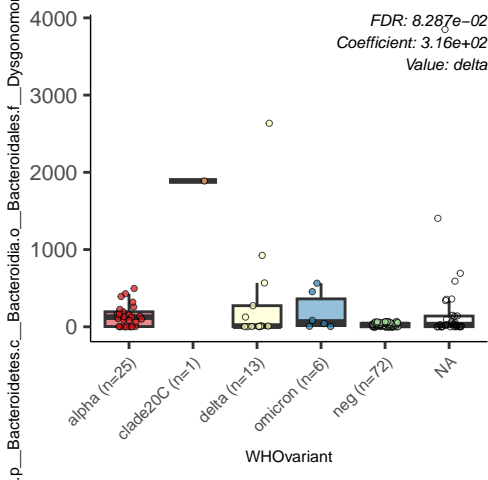



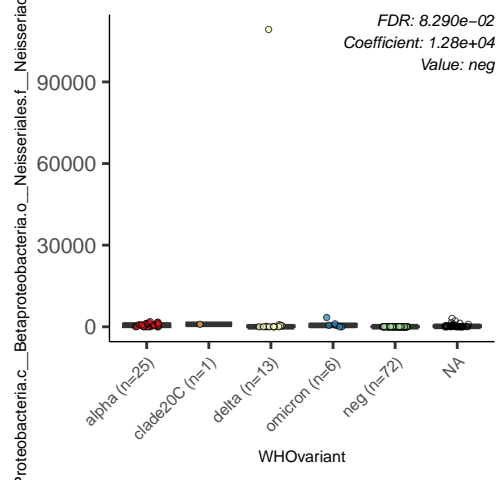

ria.p\_\_Proteobacteria.c\_\_Gammaproteobacteria.o\_\_Xanthomonada

FDR:  $8.302e-02$   
Coefficient:  $-1.10e+05$   
Value: omicron

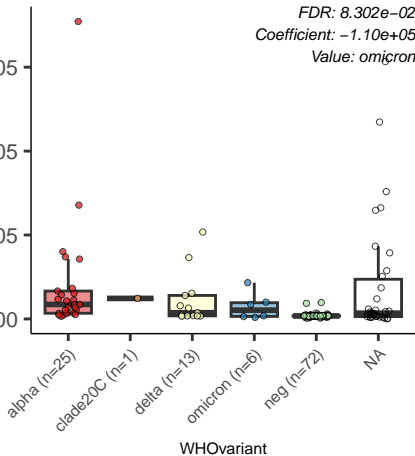

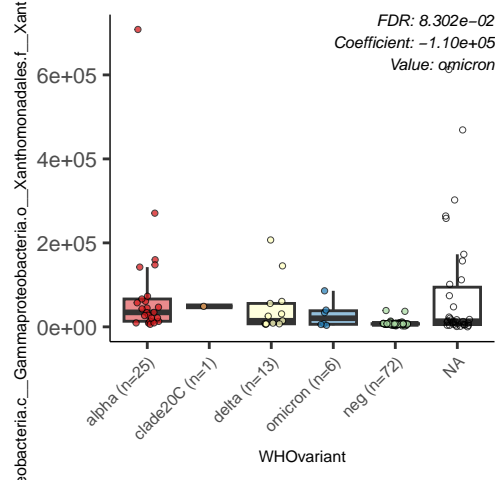

FDR:  $8.311e-02$   
Coefficient:  $-1.10e+05$   
Value: qmicron

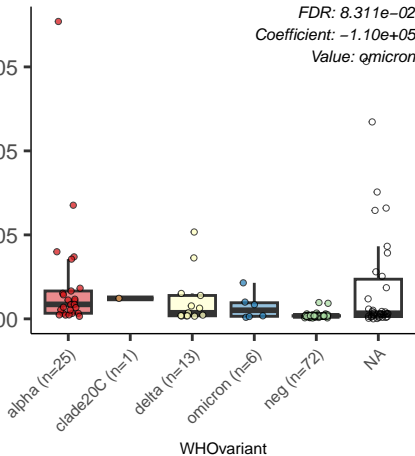

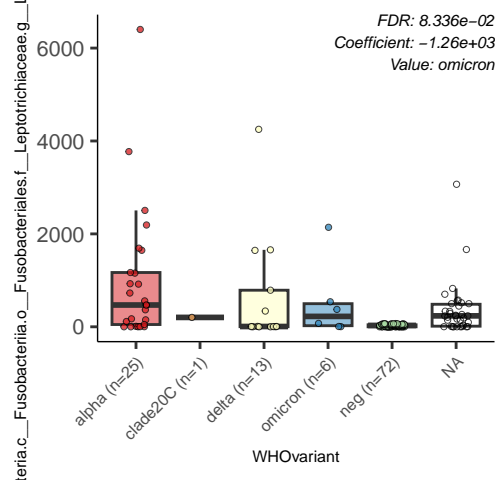

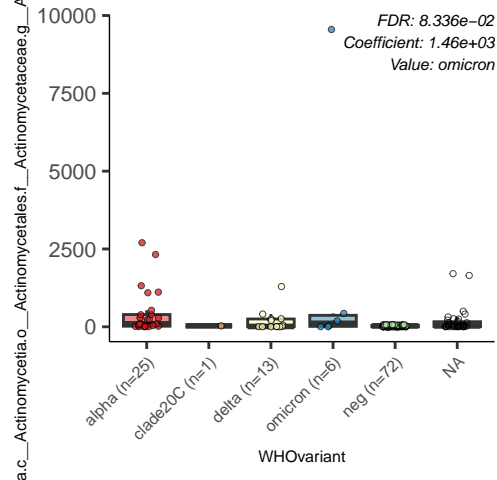

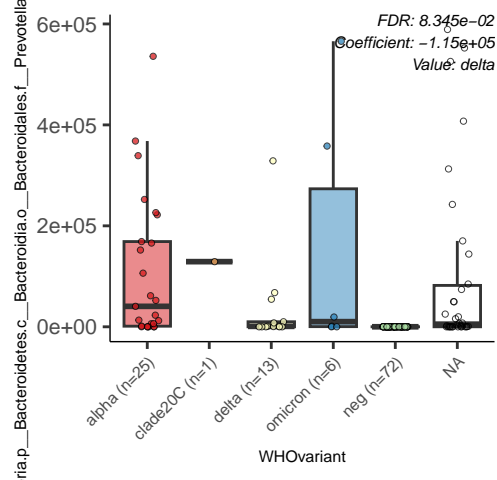

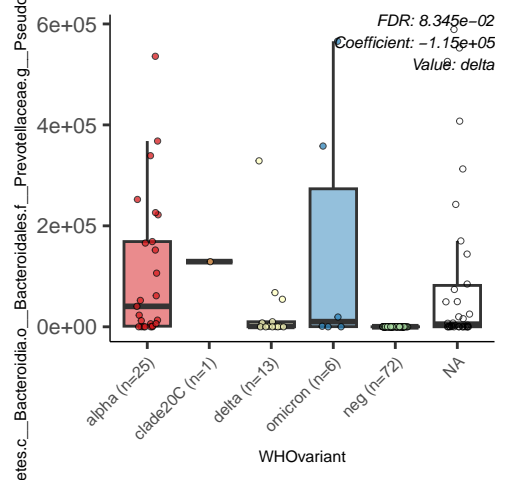



eria.p\_\_Bacteroidetes.c\_\_Flavobacteriia.o\_\_Flavobacteriales.f\_\_We

FDR:  $8.426e-02$   
Coefficient:  $-1.47e+03$   
Value: omicron

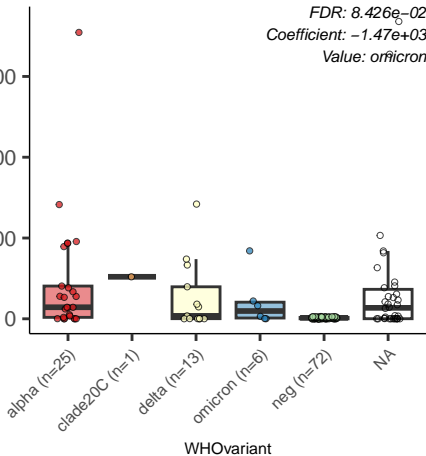

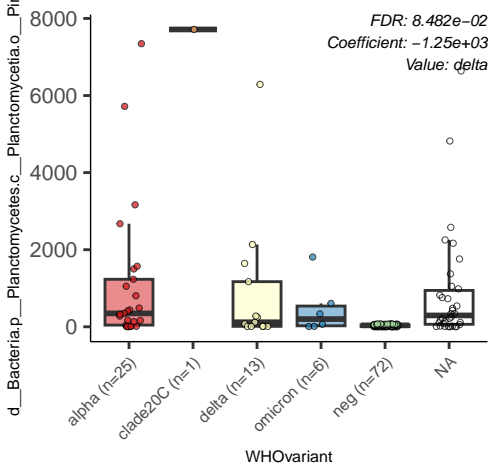

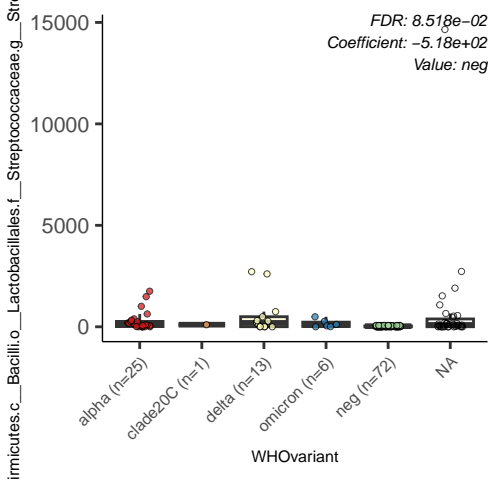

teria.p\_\_Firmicutes.c\_\_Bacilli.o\_\_Bacillales.f\_\_Bacillaceae.g\_\_Baci

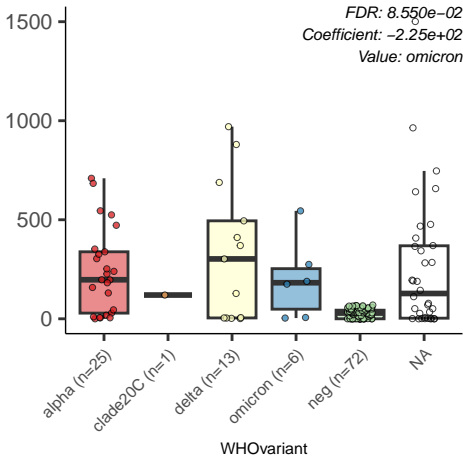

d\_Bacteria.p\_Aquificae

FDR:  $8.597e-02$

Coefficient:  $-4.10e+02$

Value: omicron

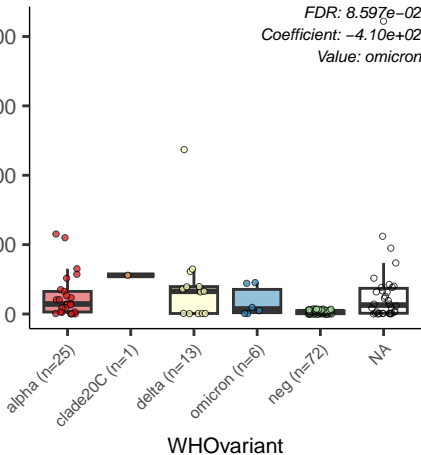

WHOVariant

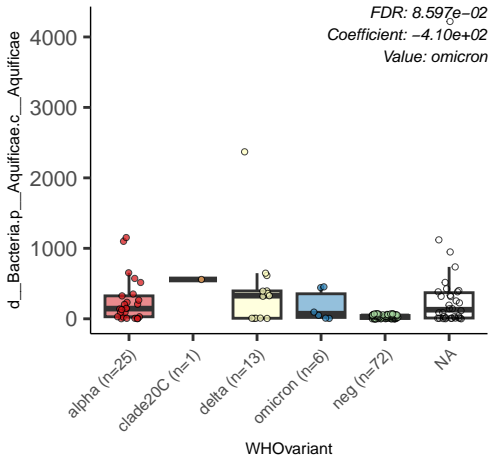

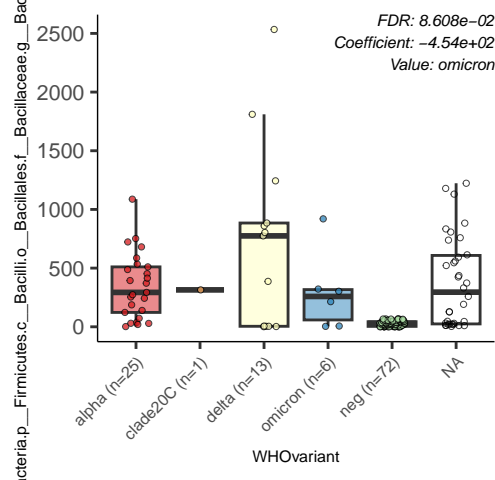

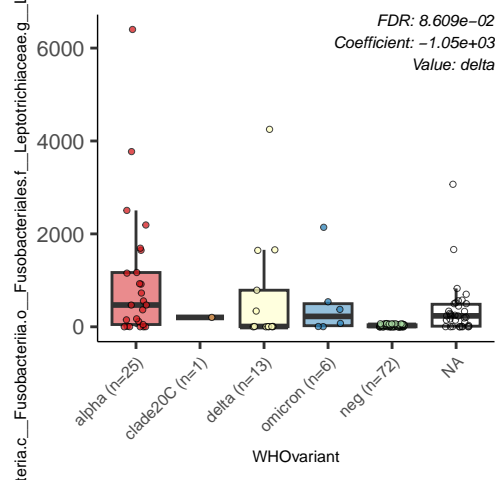



Gammaproteobacteria.o\_\_Pseudomonadales.f\_\_Pseudomonadaceae

FDR:  $8.615e-02$   
Coefficient:  $-1.71e+02$   
Value: omicron

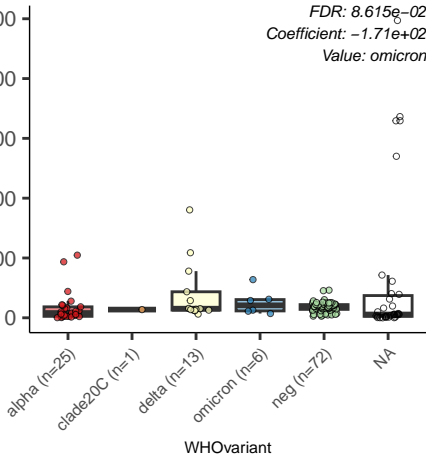

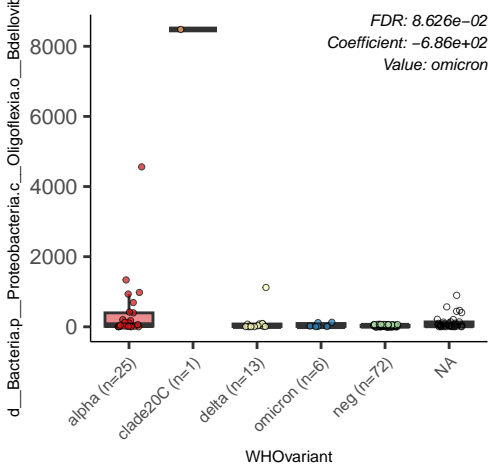

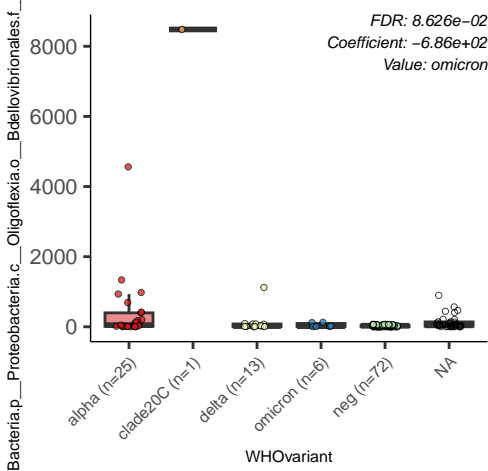

eroidetes.c\_\_Cytophagia.o\_\_Cytophagales.f\_\_Cytophagaceae.g\_\_S

*FDR: 8.689e-02*  
*Coefficient: -2.36e+03*  
*Value: delta*

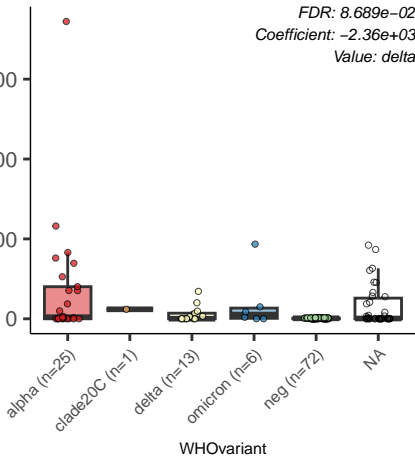

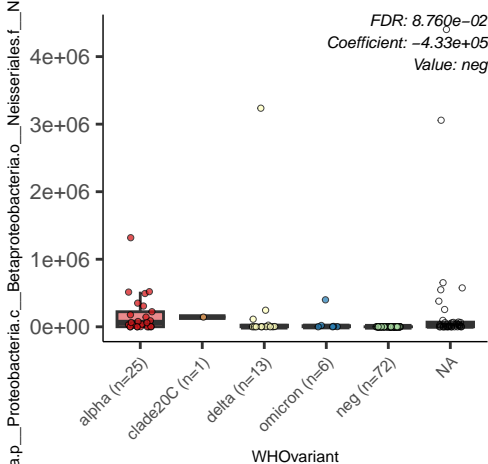

ococcus.Thermus.c\_Deinococci.o\_Thermales.f\_Thermaceae.g

FDR:  $8.774e-02$   
Coefficient:  $2.85e+02$   
Value: omicron

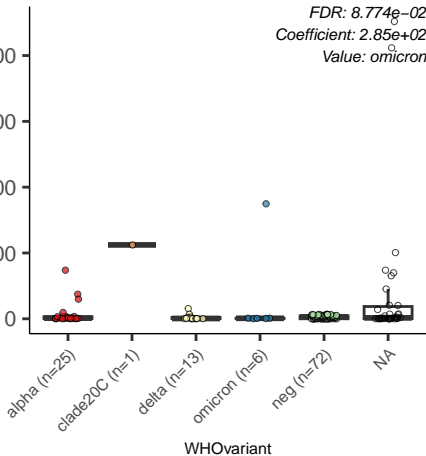

s.c.\_Bacilli.o\_Lactobacillales.f\_Streptococcaceae.g\_Streptococcus

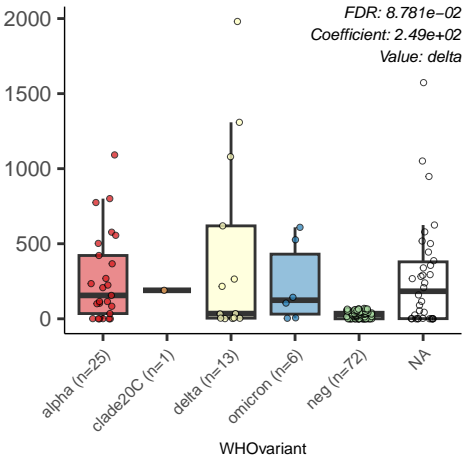

teria.p\_\_Firmicutes.c\_\_Clostridia.o\_\_Eubacteriales.f\_\_Peptococcae

FDR:  $8.815e-02$   
Coefficient:  $-8.05e+02$   
Value: omicron

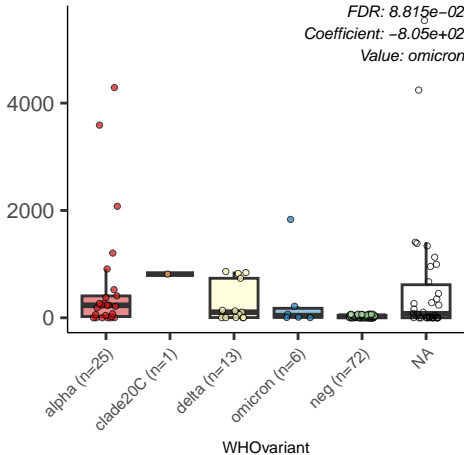



c\_\_Clostridia.o\_\_Eubacteriales.f\_\_Peptococcaceae.g\_\_Dehalobac

FDR:  $8.815e-02$   
Coefficient:  $-8.05e+02$   
Value: omicron

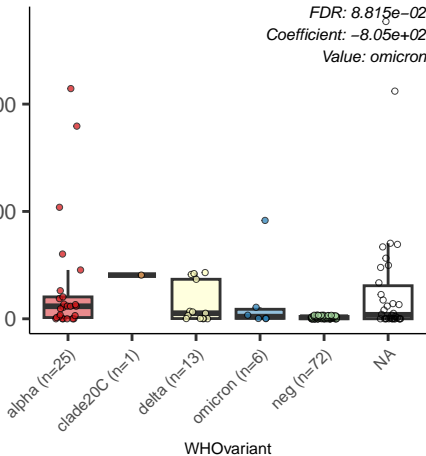

Firmicutes.c\_\_Clostridia.o\_\_Eubacteriales.f\_\_Eubacteriales.Family

FDR:  $8.906e-02$   
Coefficient:  $-4.56e+03$   
Value: delta

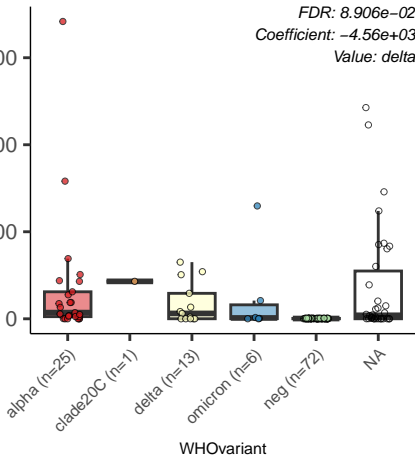

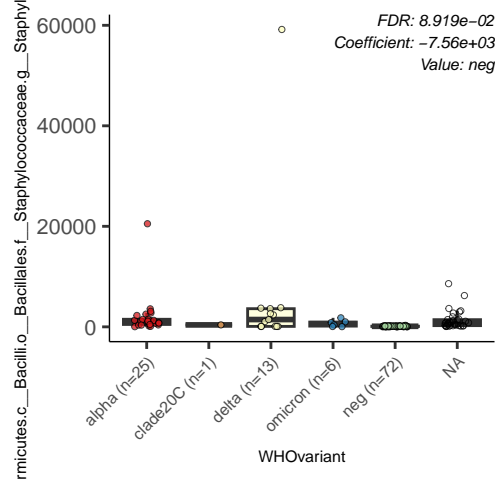

\_Firmicutes.c\_\_Bacilli.o\_\_Bacillales.f\_\_Paenibacillaceae.g\_\_Paeniba

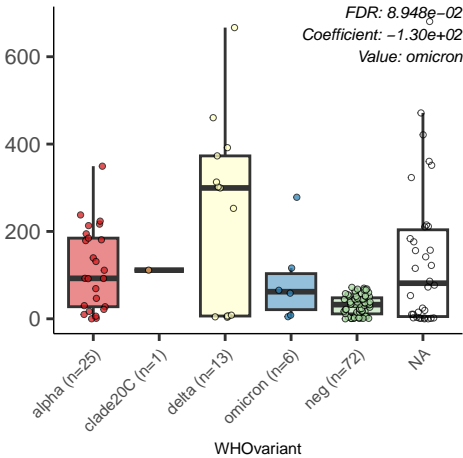

obacteria.c\_\_Fusobacteriia.o\_\_Fusobacteriales.f\_\_Leptotrichiaceae

FDR:  $8.972e-02$   
Coefficient:  $-9.29e+04$   
Value: neg

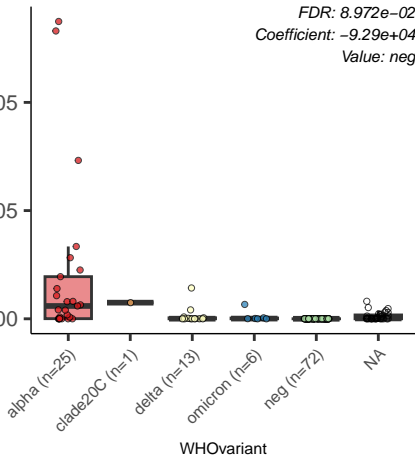

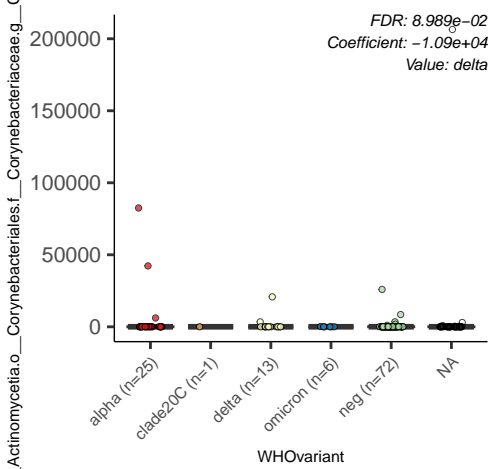

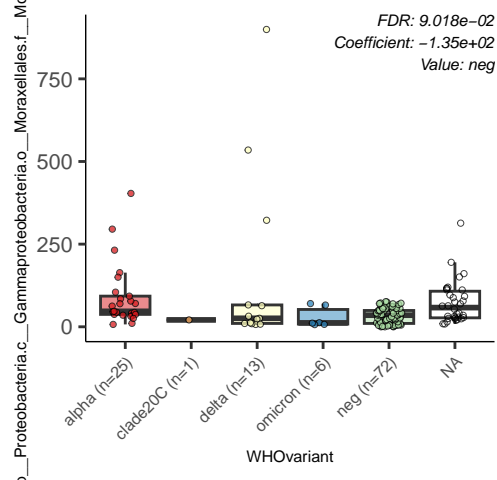

acteroidetes.c\_\_Spingobacteria.o\_\_Spingobacteriales.f\_\_Sping

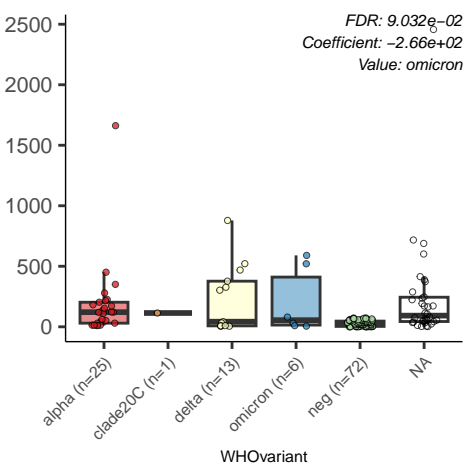

*FDR: 9.032e-02*

*Coefficient:*  $-2.66e+02$

Value: omicron



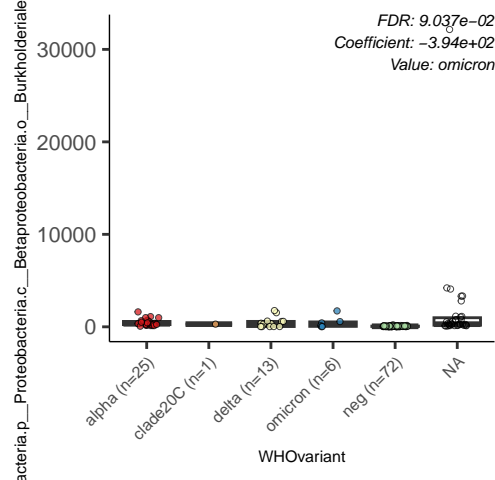

ria.p\_\_Proteobacteria.c\_\_Betaproteobacteria.o\_\_Neisseriales.f\_\_N

*FDR: 9.079e-02*  
*Coefficient: -6.99e+02*  
*Value: clade20C*

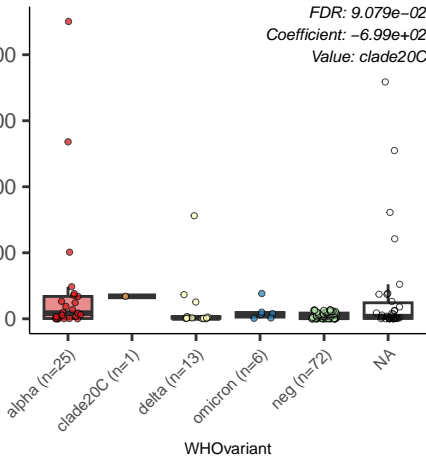

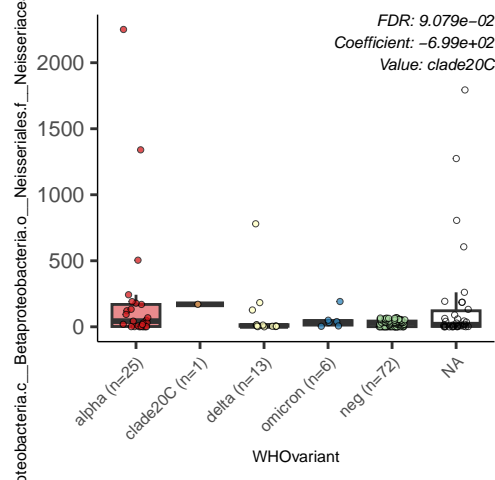

teria.c\_\_Gammaproteobacteria.o\_\_Pasteurellales.f\_\_Pasteurellaceae

FDR:  $9.080e-02$   
Coefficient:  $1.32e+02$   
Value: delta

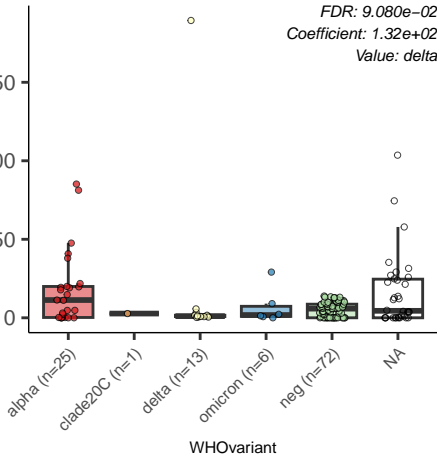

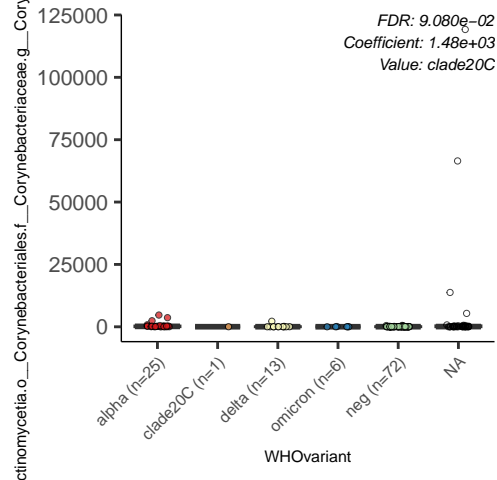

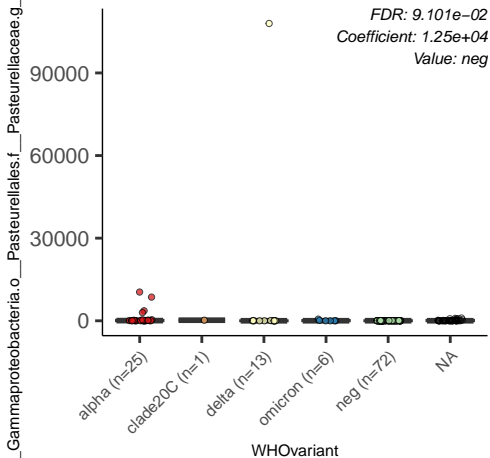

utes.c\_\_Clostridia.o\_\_Eubacteriales.f\_\_Lachnospiraceae.g\_\_Medite

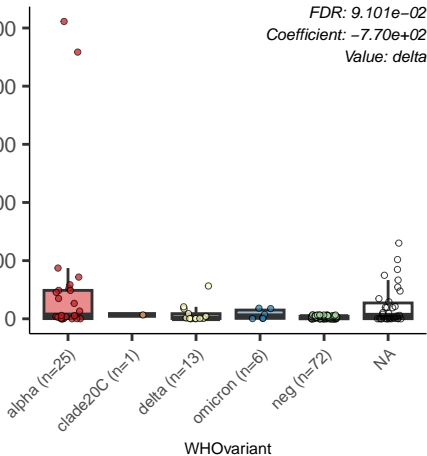

eria.p\_\_Proteobacteria.c\_\_Alphaproteobacteria.o\_\_Sphingomonada

FDR:  $9.144e-02$   
Coefficient:  $-1.75e+04$   
Value: omicron

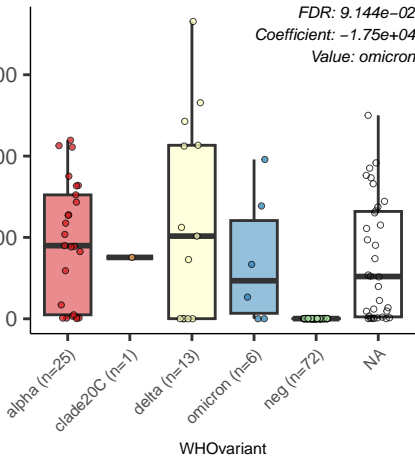



FDR:  $9.204e-02$   
Coefficient:  $1.16e+03$   
Value: omicron

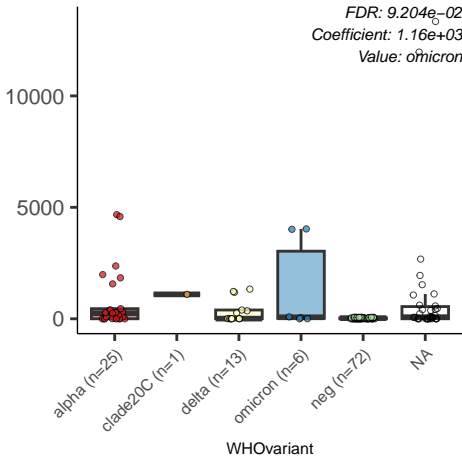

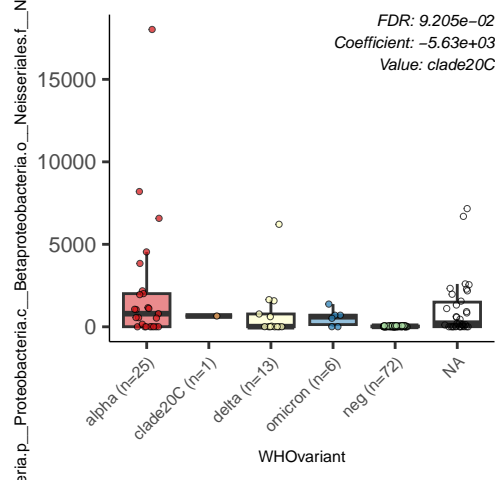

*FDR: 9.232e-02*

*Coefficient:*  $-4.00e+02$

Value: omicron

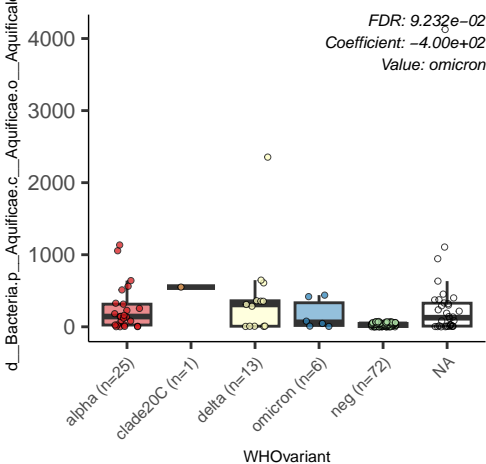

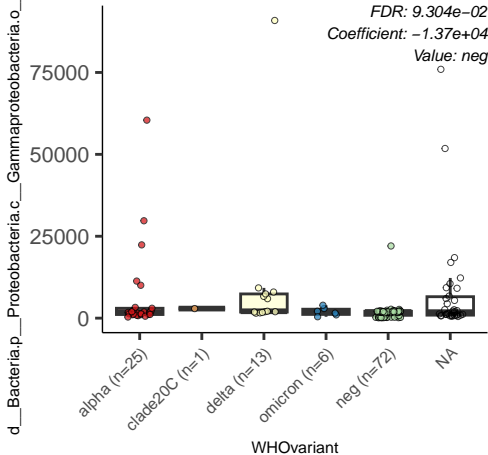

Bacteria.p\_\_Proteobacteria.c\_\_Gammaproteobacteria.o\_\_Moraxella

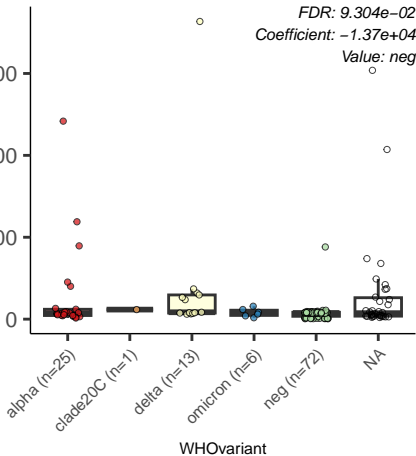

cutes.c\_\_Bacilli.o\_\_Lactobacillales.f\_\_Streptococcaceae.g\_\_Strepto

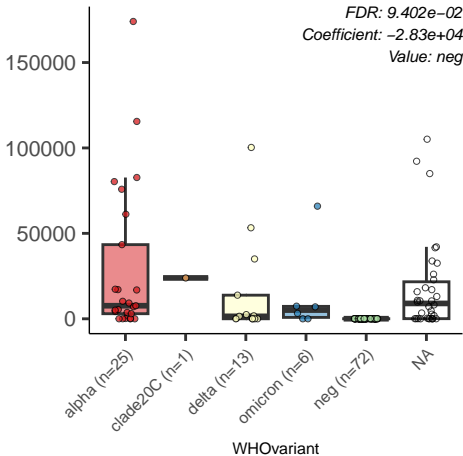

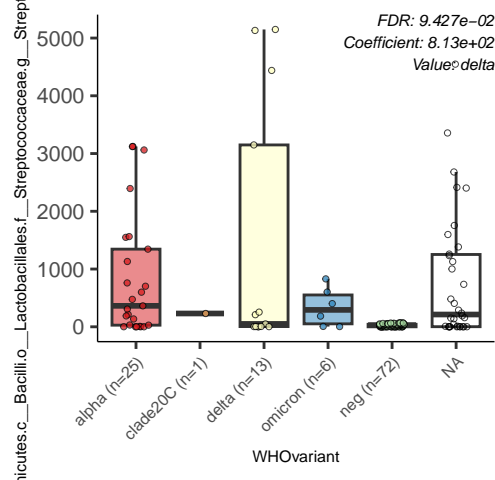

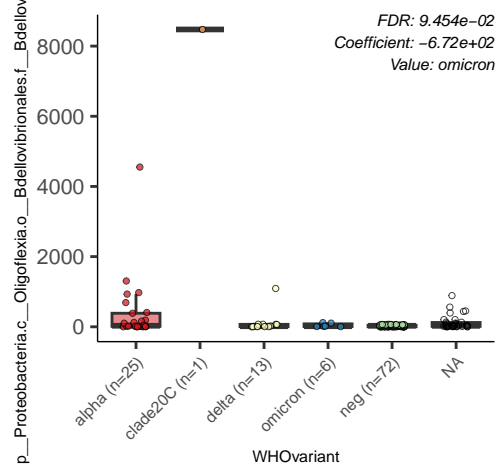



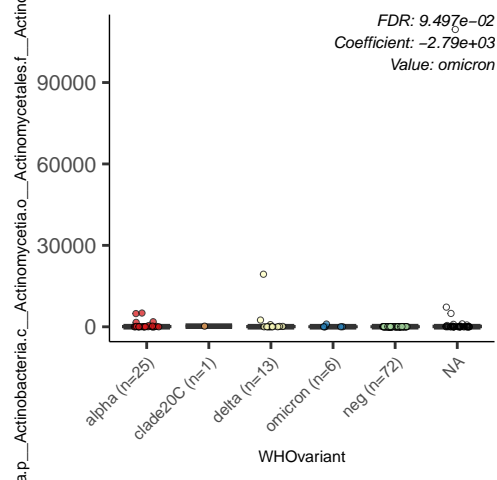

bacteria.c\_Actinomycetia.o\_Actinomycetales.f\_Actinomycetaceae

FDR:  $9.497 \times 10^{-2}$   
Coefficient:  $-2.79 \times 10^3$   
Value: omicron

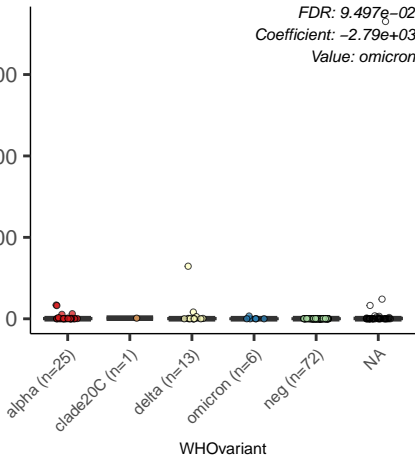

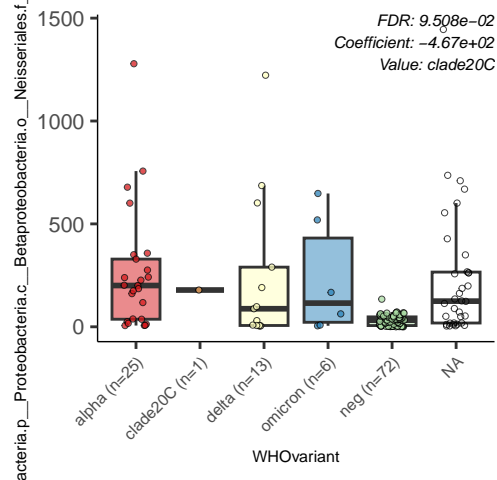

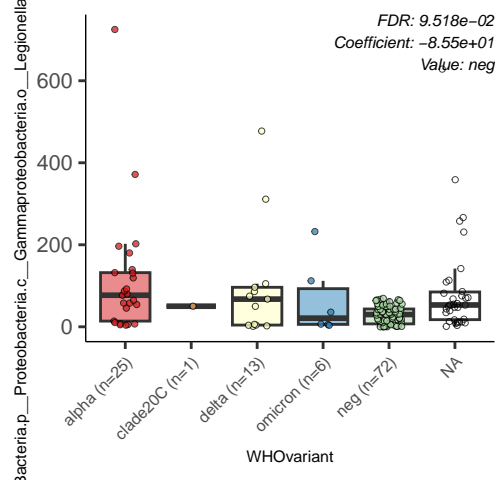

s.c\_\_Clostridia.o\_\_Eubacteriales.f\_\_Lachnospiraceae.g\_\_Lachnoclostridium

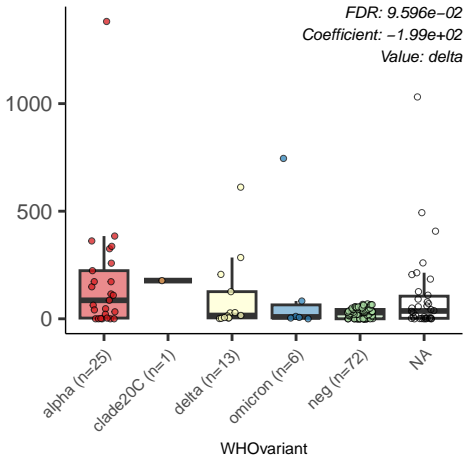

obacteria.c\_\_Fusobacteriia.o\_\_Fusobacteriales.f\_\_Leptotrichiaceae

FDR:  $9.614e-02$   
Coefficient:  $-7.81e+02$   
Value: delta

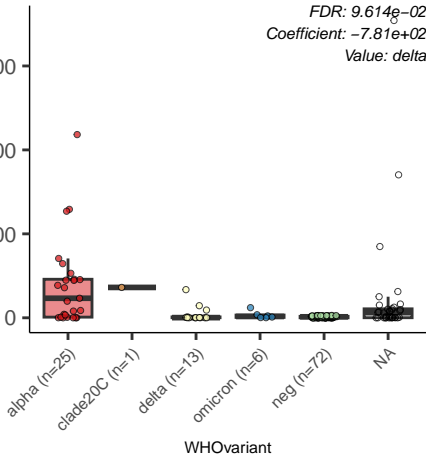

FDR:  $9.669e-02$   
Coefficient:  $1.54e+02$   
Value: delta

1000

500

0

alpha (n=25)

clade20C (n=1)

delta (n=13)

omicron (n=6)

neg (n=72)

NA

WHOvariant

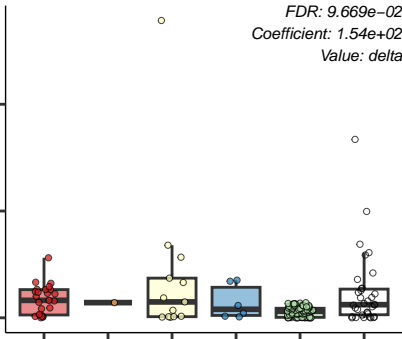

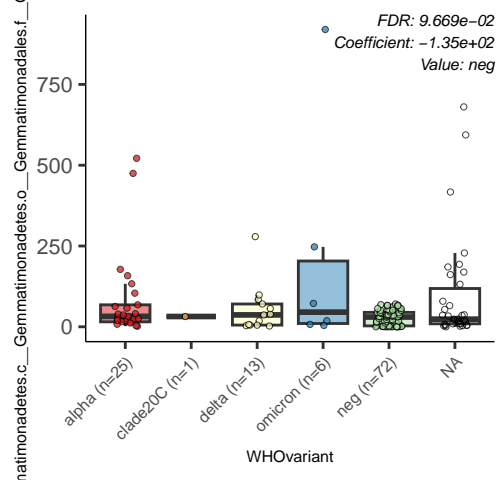



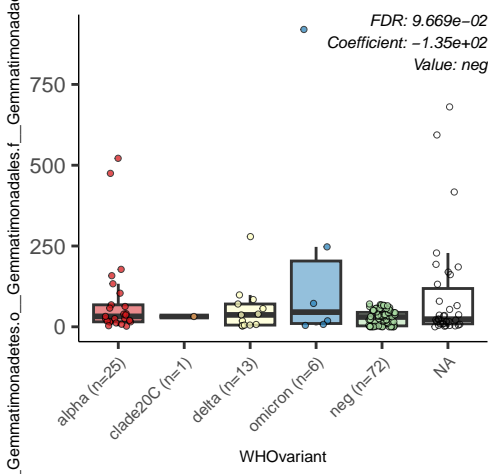

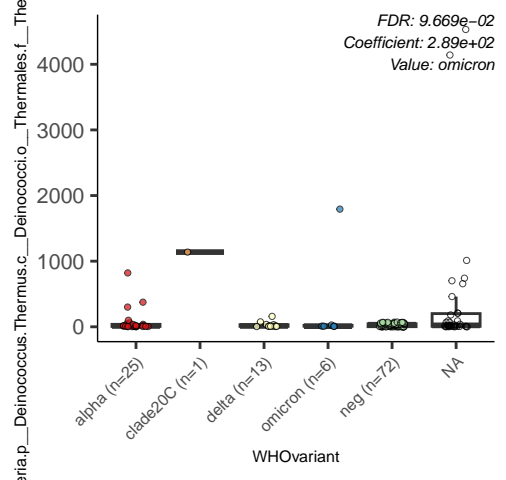

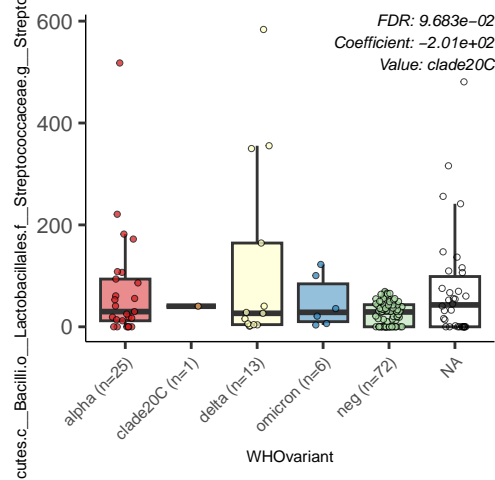

d\_Archaea

FDR:  $9.687e-02$

Coefficient:  $-1.80e+02$

Value: neg

1000

500

0

alpha (n=25)

clade20C (n=1)

delta (n=13)

omicron (n=6)

neg (n=72)

NA

WHOvariant

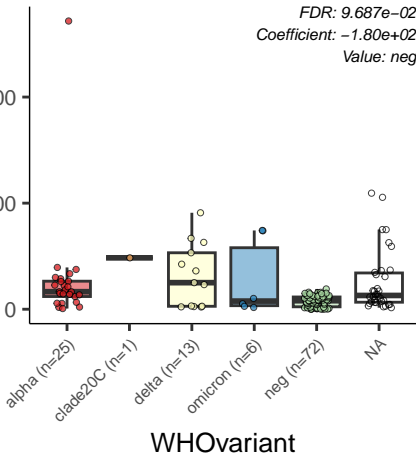

...: \_\_Epsilonproteobacteria.o\_\_Campylobacteriales.f\_\_Campylobacter

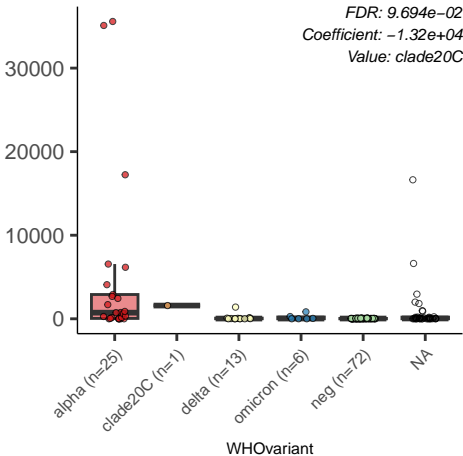

ria.p\_\_Proteobacteria.c\_\_Epsilonproteobacteria.o\_\_Campylobacter

$FDR: 9.695e-02$   
 $Coefficient: -5.57e+02$   
 $Value: delta$

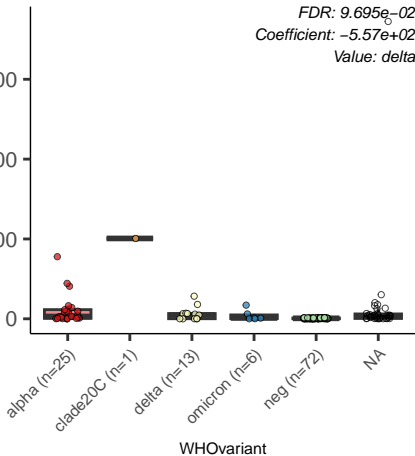

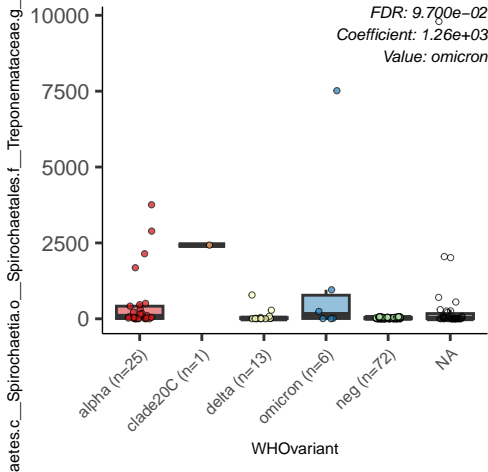

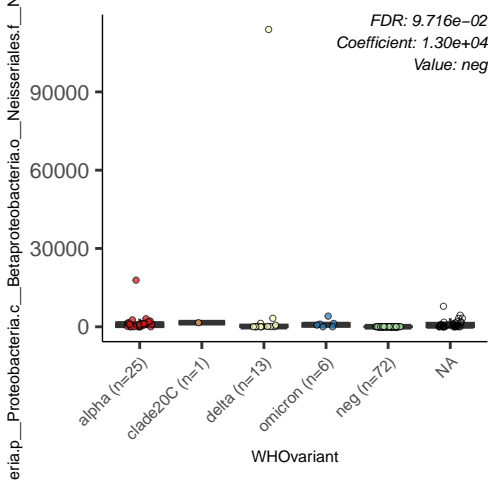



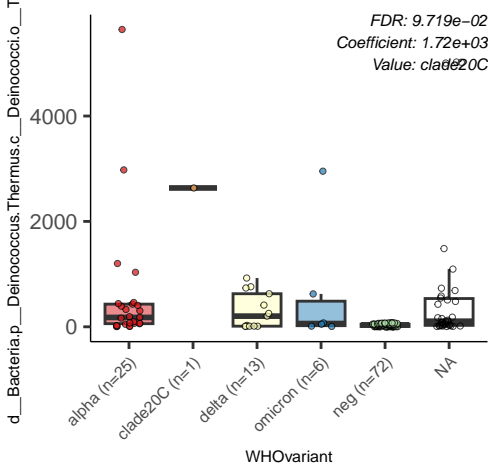

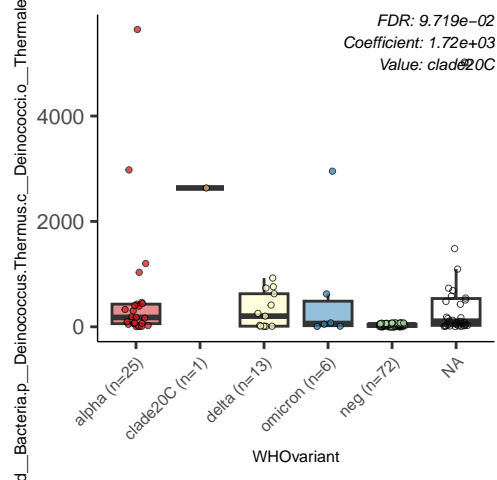

bacteria.p\_Firmicutes.c\_Tissierellia.o\_Tissierellales.f\_Peptoniph

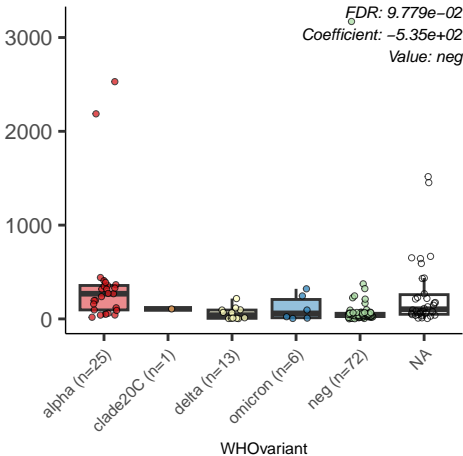

Firmicutes.c\_\_Tissierellia.o\_\_Tissierellales.f\_\_Peptoniphilaceae.g

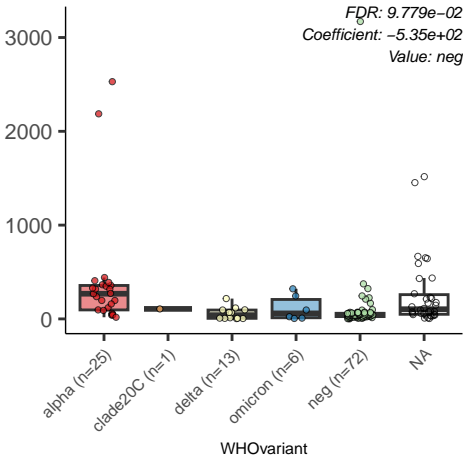

Firmicutes.c\_\_Negativicutes.o\_\_Acidaminococcales.f\_\_Acidaminino

FDR:  $9.781e-02$   
Coefficient:  $-3.73e+02$   
Value: delta

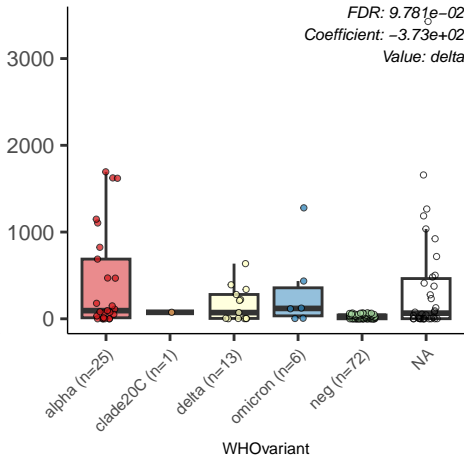

micutes.c\_\_Bacilli.o\_\_Lactobacillales.f\_\_Lactobacillaceae.g\_\_Ligilac

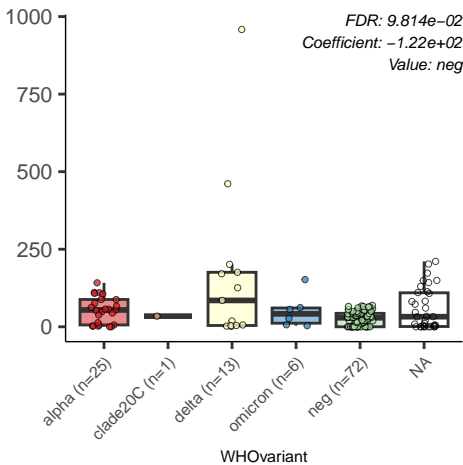

nicutes.c\_\_Bacilli.o\_\_Lactobacillales.f\_\_Streptococcaceae.g\_\_Strep

FDR:  $9.846e-02$   
Coefficient:  $3.60e+03$   
Value: delta

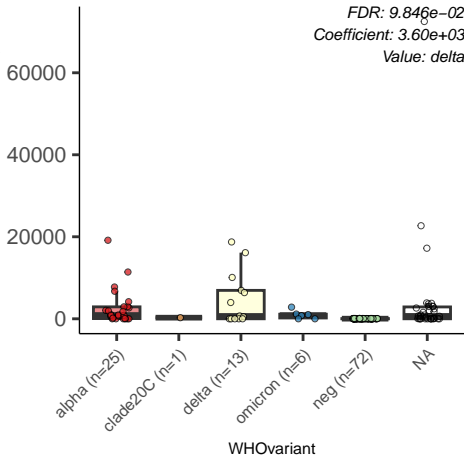

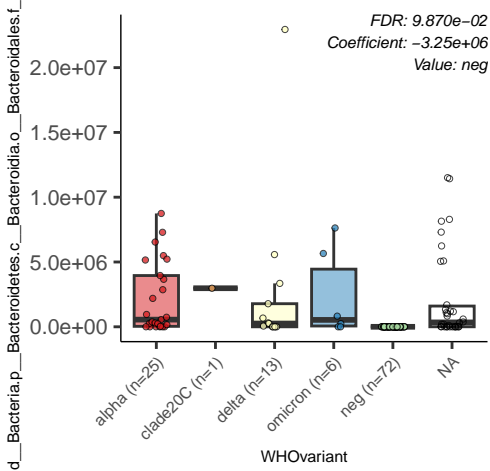



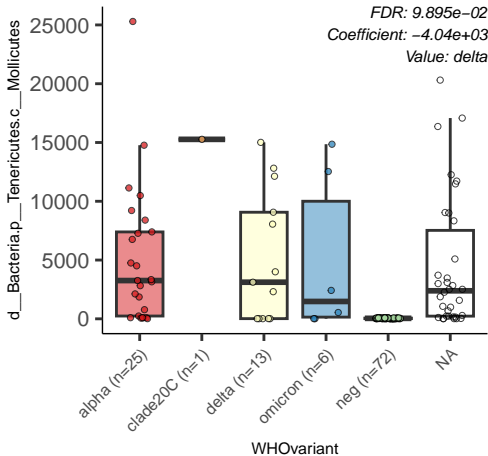

s.c\_\_Clostridia.o\_\_Eubacteriales.f\_\_Eubacteriales.Family.XIII..Ince

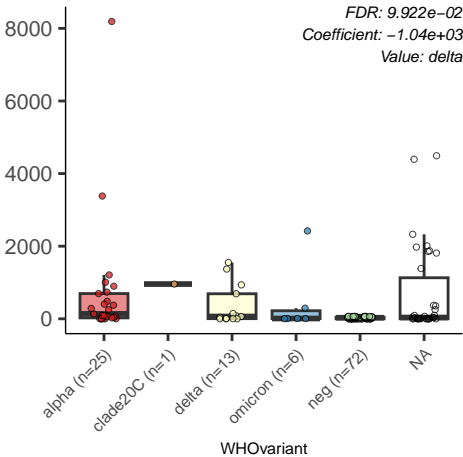



d\_Bacteria.p\_Armatimonadetes.c\_Fimbrimonadia.o\_Fimb

FDR:  $9.960e-02$   
Coefficient:  $-9.09e+01$   
Value: omicron

400  
200  
0

alpha (n=25)

clade20C (n=1)

delta (n=13)

omicron (n=6)

neg (n=72)

NA

WHOvariant

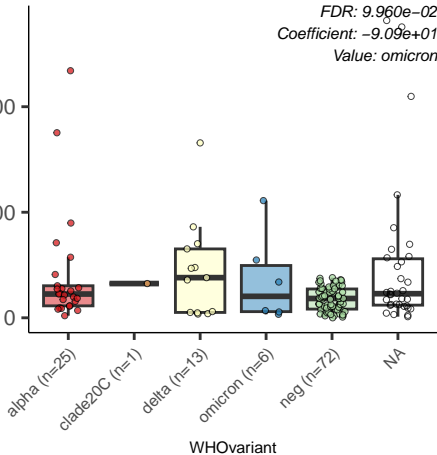

cteria.p\_Armatimonadetes.c\_Fimbrimonadia.o\_Fimbrimonadale

FDR:  $9.960 \times 10^{-2}$   
Coefficient:  $-9.09 \times 10^1$   
Value: omicron

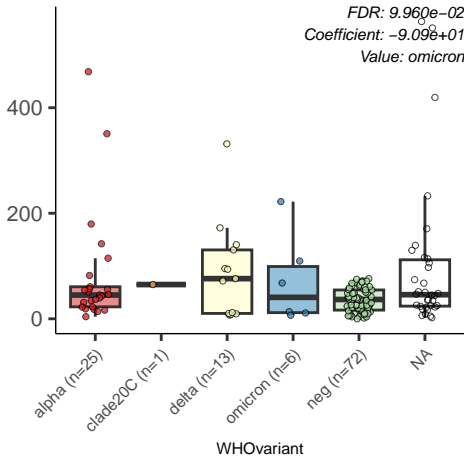



tes.c\_\_Fimbrimonadia.o\_\_Fimbrimonadales.f\_\_Fimbrimonadaceae

FDR:  $9.960e-02$   
Coefficient:  $-9.09e+01$   
Value: omicron

400  
200  
0

alpha (n=25)

clade20C (n=1)

delta (n=13)

omicron (n=6)

neg (n=72)

NA

WHOvariant

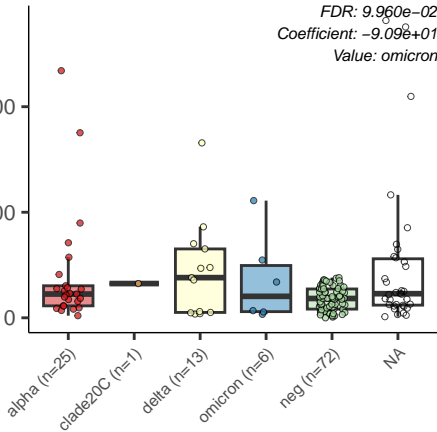

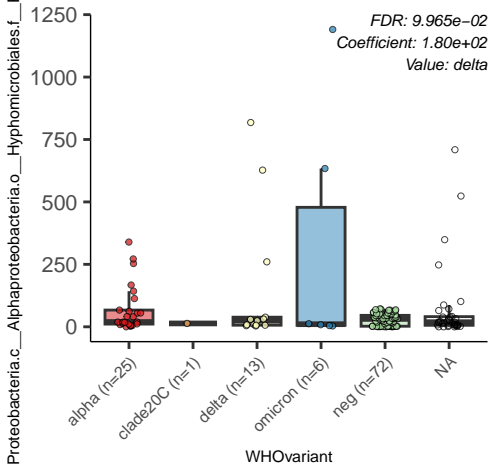



FDR:  $9.981e-02$   
Coefficient:  $-3.97e+03$   
Value: delta

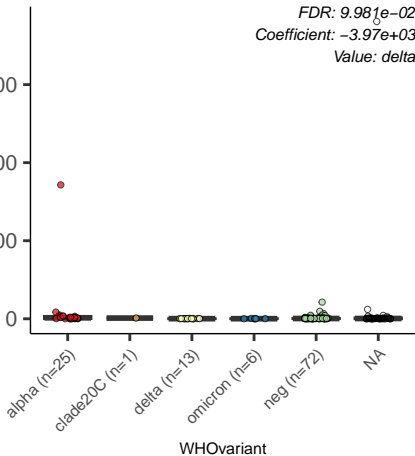

Proteobacteria.c\_\_Gammaproteobacteria.o\_\_Pasteurellales.f\_\_Pa

FDR: 1.003e-01  
Coefficient: 1.53e+02  
Value: delta

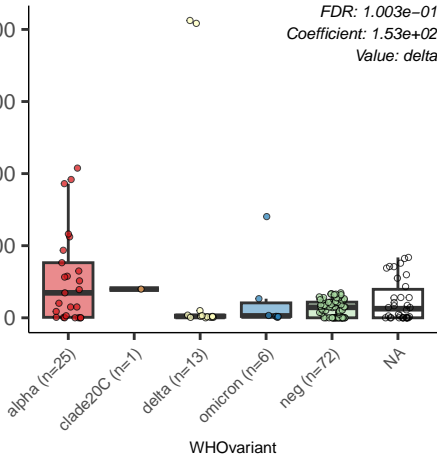

acteria.c\_\_Betaproteobacteria.o\_\_Burkholderiales.f\_\_Burkholderiaceae

FDR:  $1.003e-01$   
Coefficient:  $-6.50e+01$   
Value: omicron

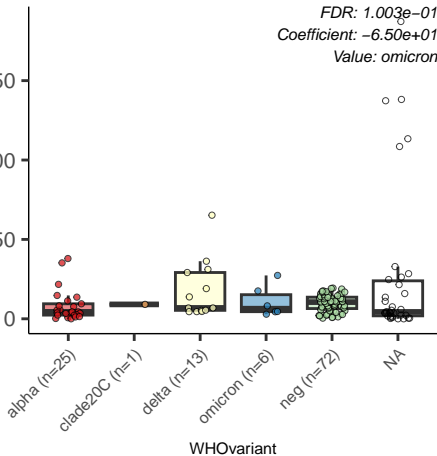

d\_\_Bacteria.p\_\_Actinobacteria.c\_\_Acidimicrobiia

FDR:  $1.004e-01$   
Coefficient:  $-1.86e+02$   
Value: omicron

1000

500

0

alpha (n=25)

clade20C (n=1)

delta (n=13)

omicron (n=6)

neg (n=72)

NA

WHOvariant

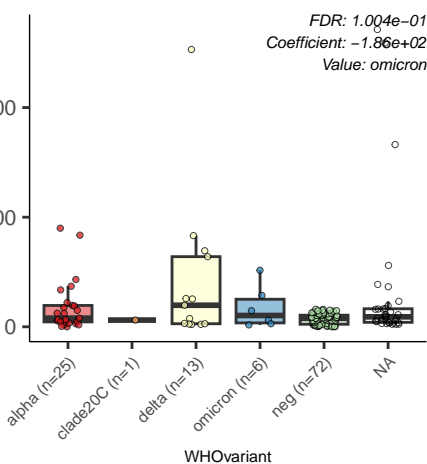

d\_Bacteria.p\_Actinobacteria.c\_Acidimicrobia.o\_Acidimicrobia.p

1000

500

0

alpha (n=25)

clade20C (n=1)

delta (n=13)

omicron (n=6)

neg (n=72)

NA

WHOvariant

FDR:  $1.004e-01$   
Coefficient:  $-1.86e+02$   
Value: omicron

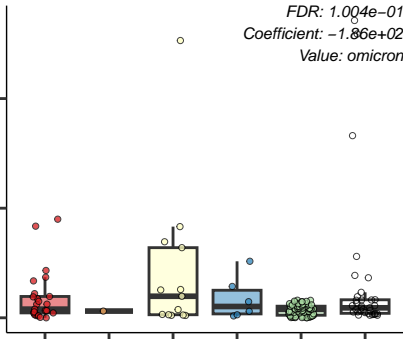

d\_Bacteria.p\_Firmicutes.c\_Bacilli.o\_Bacillales.f\_Bacillaceae.g

FDR: 1.010e-01  
Coefficient: -2.03e+02  
Value: neg

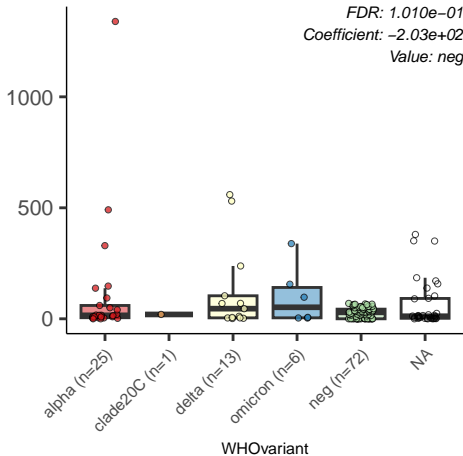

Value: omicron

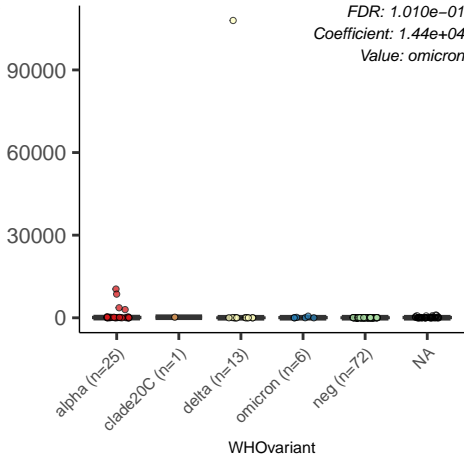

bacteria.p\_Firmicutes.c\_Bacilli.o\_Lactobacillales.f\_Lactobacillaceae

FDR: 1.028e-01  
Coefficient: -2.01e+02  
Value: neg

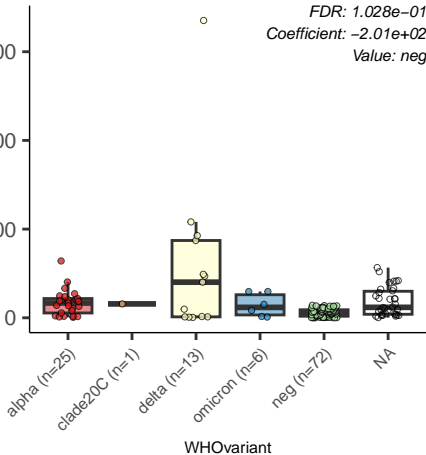



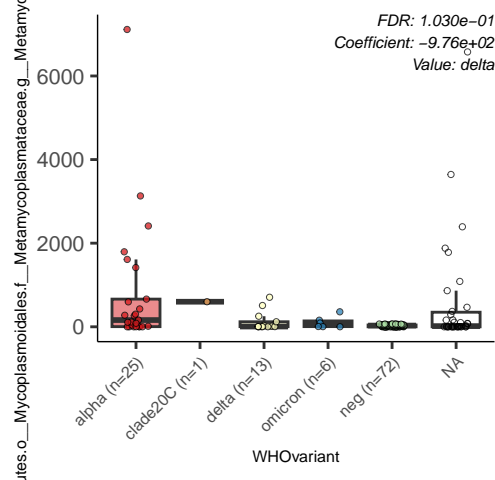

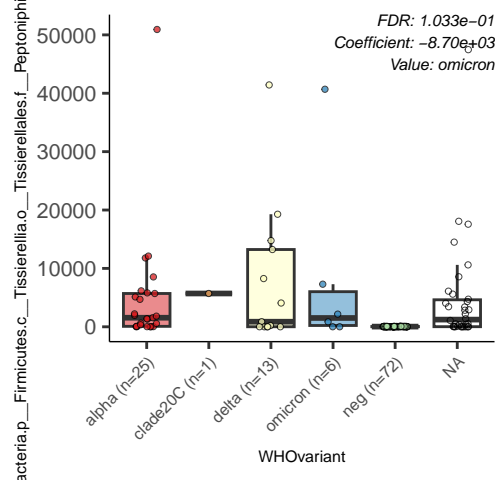

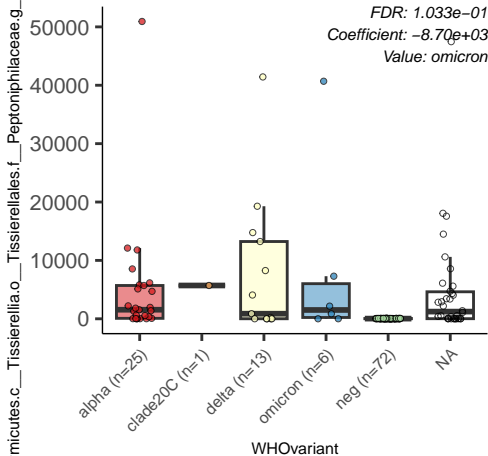

Bacteria.p\_Firmicutes.c\_Bacilli.o\_Lactobacillales.f\_\_Streptococ

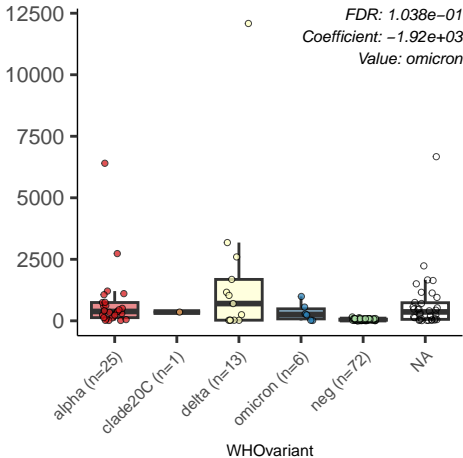

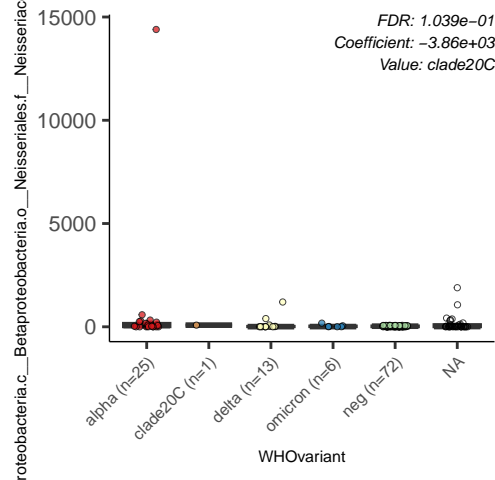

d\_\_Bacteria.p\_\_Proteobacteria.c\_\_Gammaproteobacteria.o\_\_Alti

FDR: 1.041e-01  
Coefficient: -3.78e+03  
Value: neg

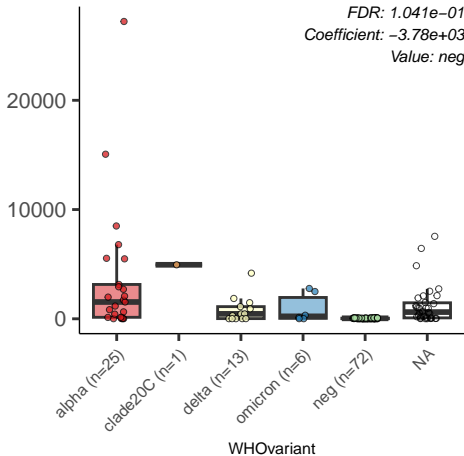

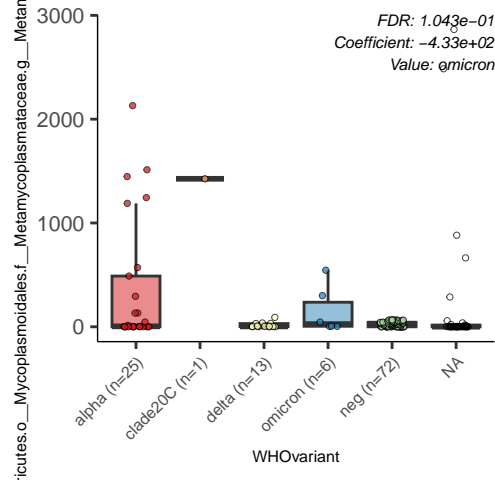

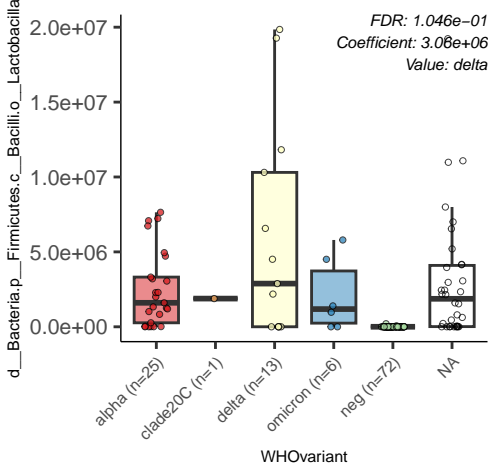



ia.p\_Actinobacteria.c\_Coriobacteriia.o\_Eggerthellales.f\_Egger

FDR:  $1.047 \times 10^{-1}$   
Coefficient:  $-1.72 \times 10^2$   
Value: neg

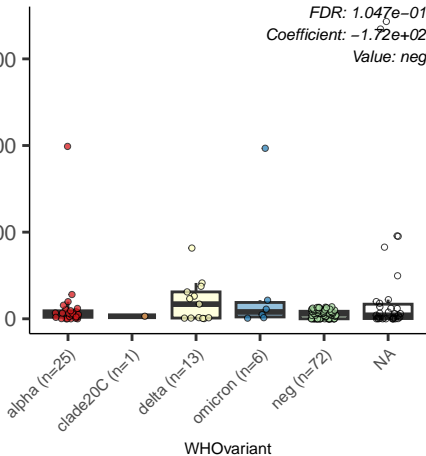

bacteria.c\_\_Coriobacteriia.o\_\_Eggerthellales.f\_\_Eggerthellaceae.g

FDR:  $1.047\text{e-}01$   
Coefficient:  $-1.72\text{e+}02$   
Value: neg

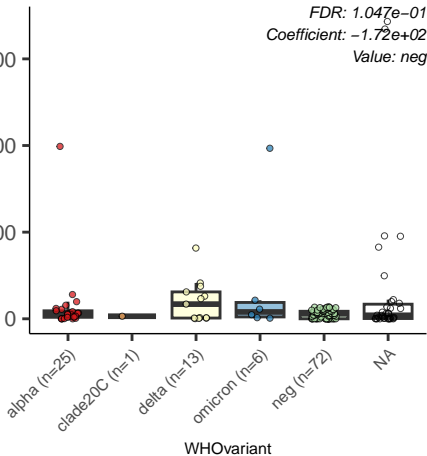

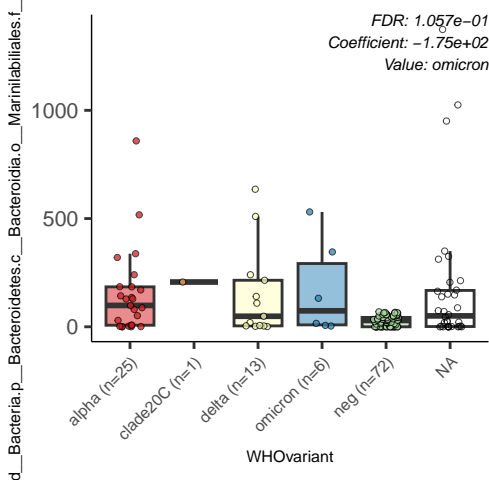

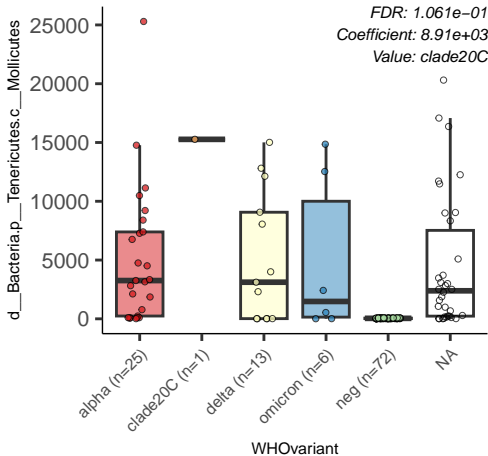

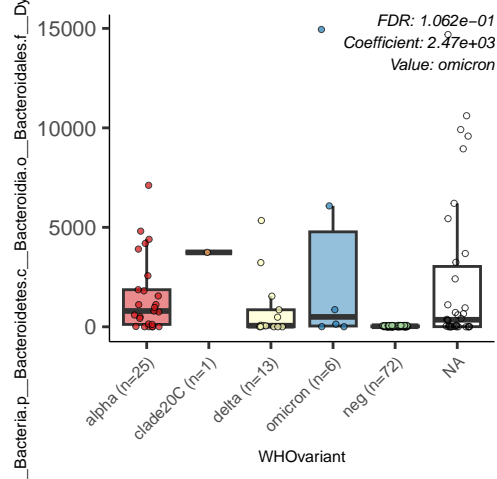

p\_Actinobacteria.c\_Actinomycetia.o\_Micrococcales.f\_Microb

FDR:  $1.065e-01$   
Coefficient:  $-4.79e+03$   
Value: omicron

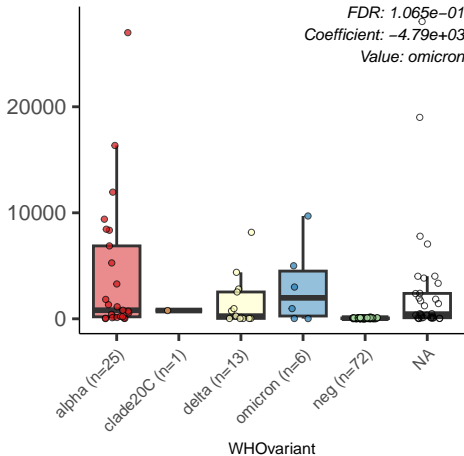

Bacteria.p\_Firmicutes.c\_Bacilli.o\_Bacillales.f\_Planococcaceae

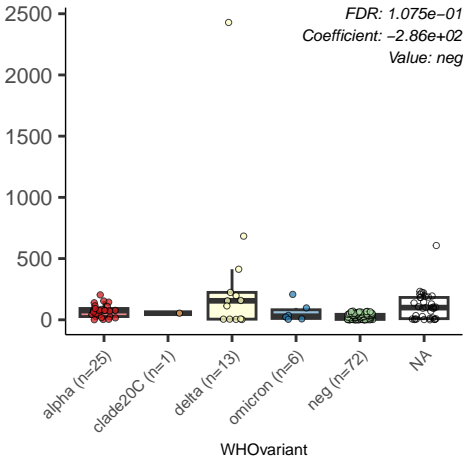

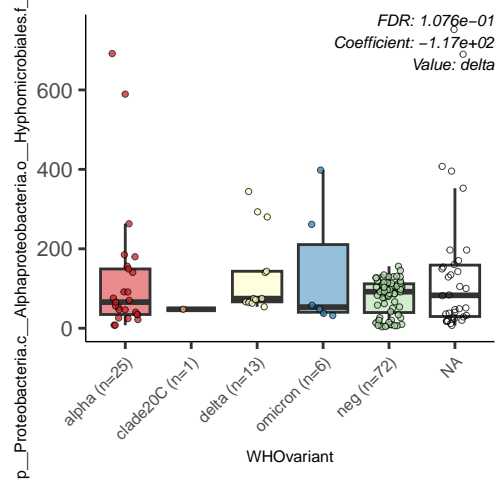



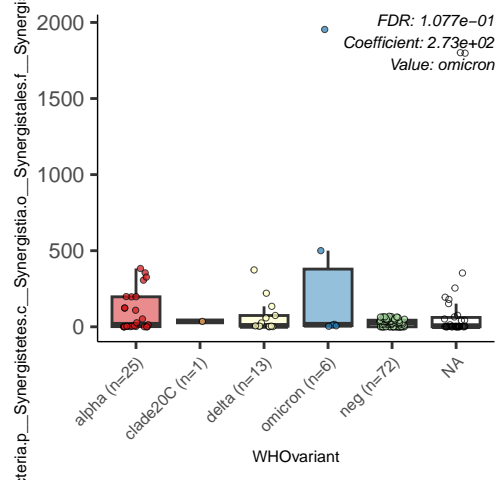

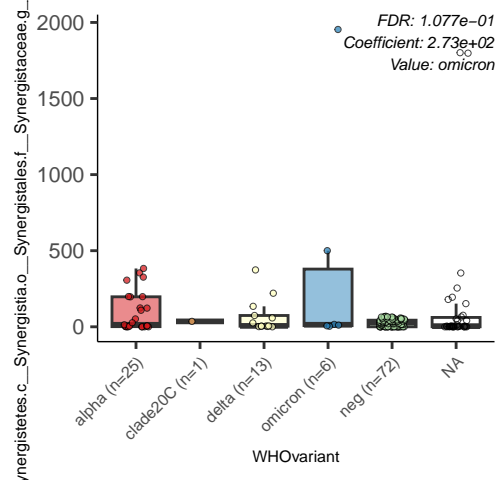

acteria.p\_\_Firmicutes.c\_\_Bacilli.o\_\_Lactobacillales.f\_\_Lactobacillaceae

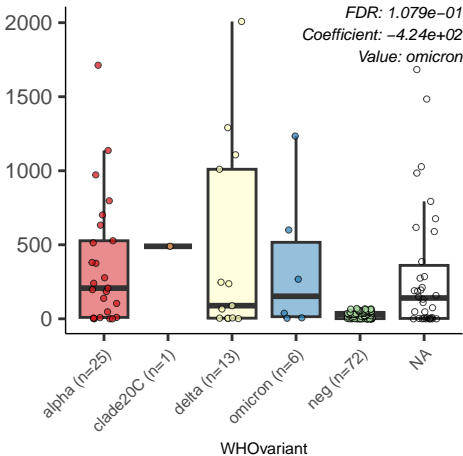

*FDR: 1.079e-01*

Coefficient:  $-4.24e+02$

Value: omicron

tes.c\_\_Bacilli.o\_\_Lactobacillales.f\_\_Lactobacillaceae.g\_\_Acetillactob

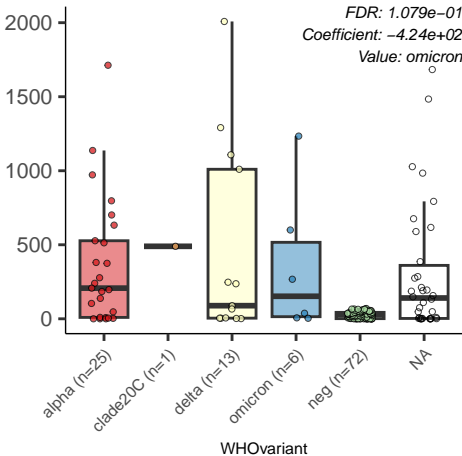

Firmicutes.c\_\_Clostridia.o\_\_Eubacteriales.f\_\_Eubacteriales.Family.X

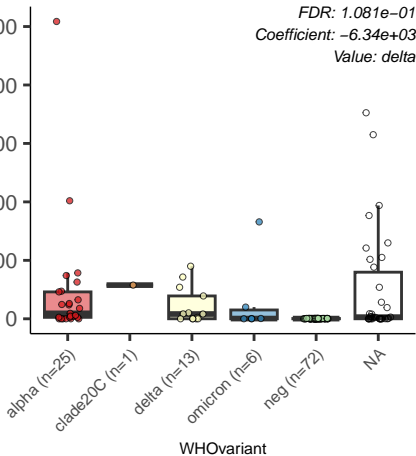

Clostridia.o\_\_Eubacteriales.f\_\_Eubacteriales.Family.XIII..Incertae.S

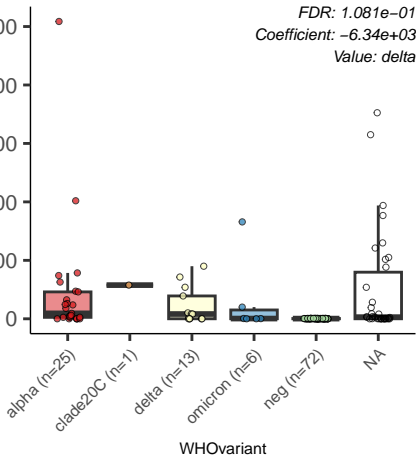

d\_Bacteria.p\_Bacteroidetes.c\_Chitinophagia

FDR:  $1.081e-01$   
Coefficient:  $-8.45e+02$   
Value: omicron

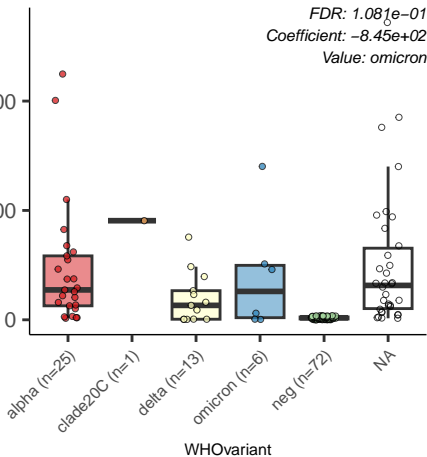

d\_Bacteria.p\_Bacteroidetes.c\_\_Chitinophagia.o\_\_Chitin

FDR:  $1.081e-01$   
Coefficient:  $-8.45e+02$   
Value: omicron

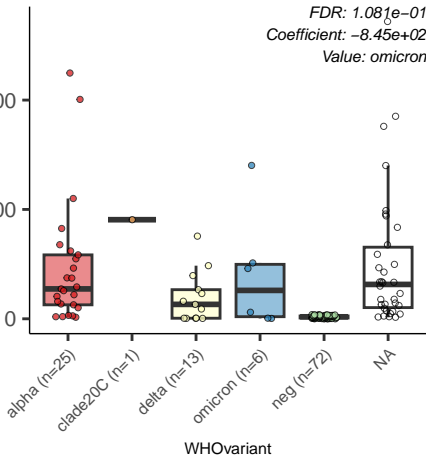



\_Bacteria.p\_\_Bacteroidetes.c\_\_Chitinophagia.o\_\_Chitinophagales.f\_\_

FDR:  $1.081e-01$   
Coefficient:  $-8.45e+02$   
Value: omicron

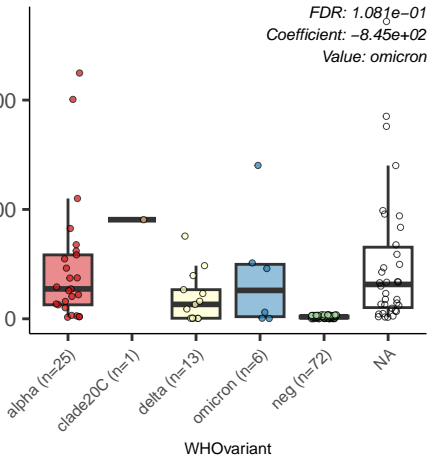

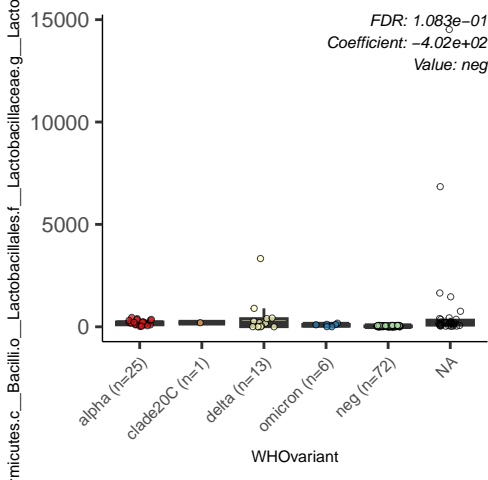

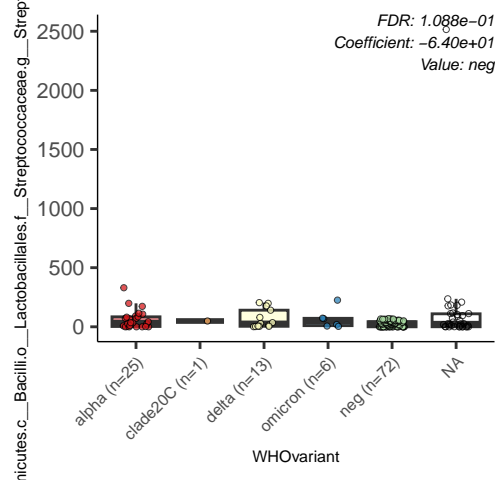

.c\_Actinomycetia.o\_Pseudonocardiales.f\_Pseudonocardaceae

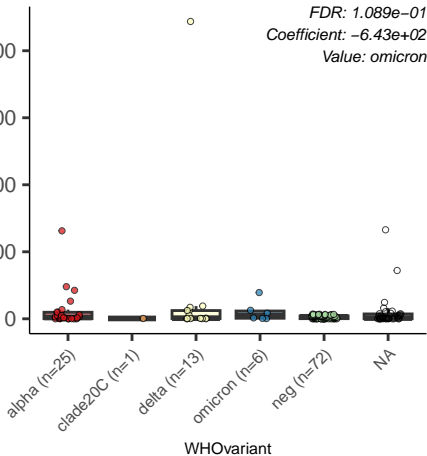

d\_Bacteria.p\_\_Cyanobacteria

FDR: 1.091e-01  
Coefficient: -8.46e+03  
Value: omicron

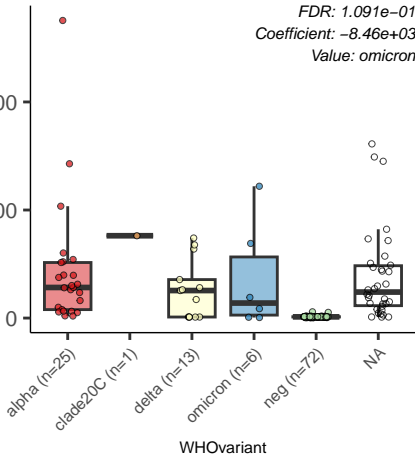

a.p.\_Bacteroidetes.c.\_Cytophagia.o.\_Cytophagales.f.\_Hymenoba

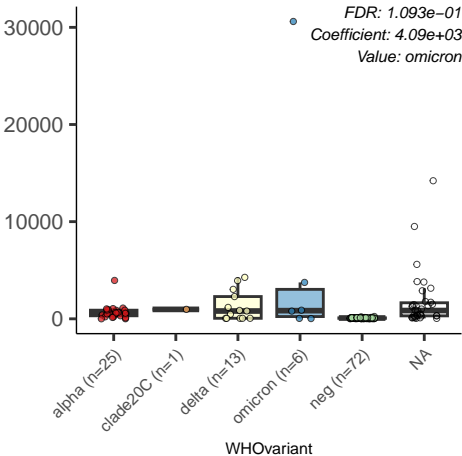

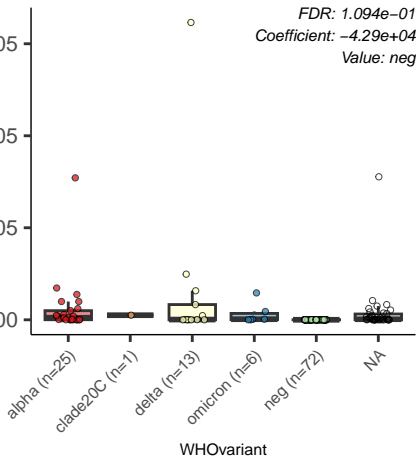

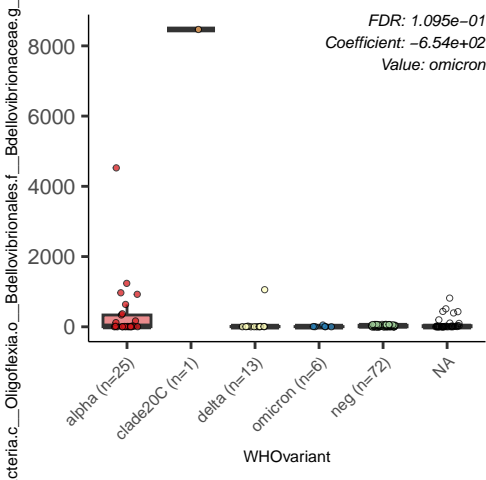



obacteria.c\_\_Actinomycetia.o\_\_Actinomycetales.f\_\_Actinomycetace

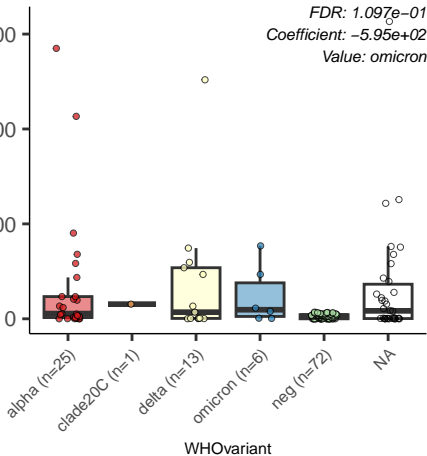

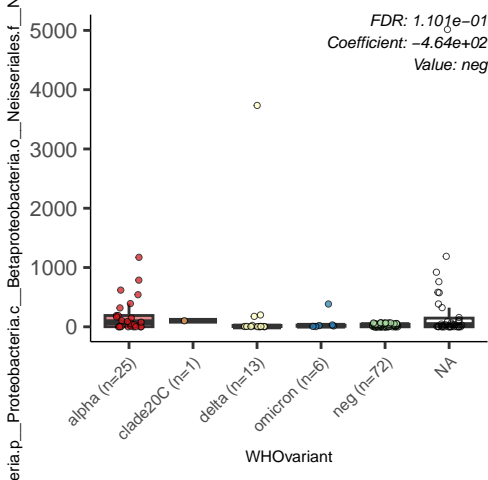

ia.c\_\_Gammaproteobacteria.o\_\_Pasteurellales.f\_\_Pasteurellaceae.

FDR: 1.101e-01  
Coefficient: -9.66e+02  
Value: clade20C

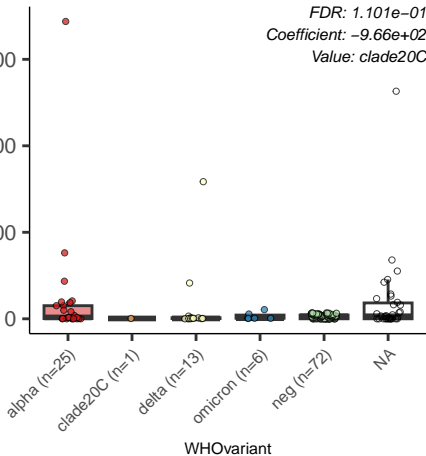

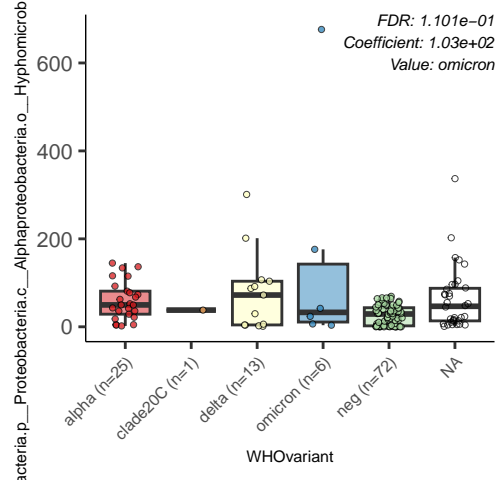

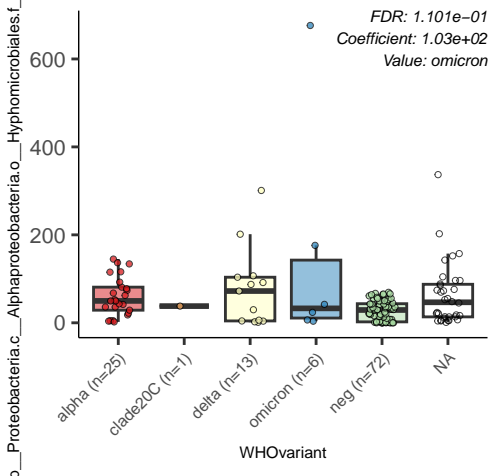

oteobacteria.c\_\_Alphaproteobacteria.o\_\_Sphingomonadales.f\_\_Ery

FDR: 1.102e-01  
Coefficient: -1.69e+04  
Value: omicron

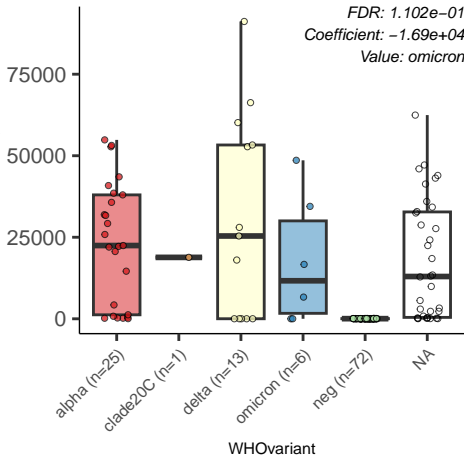

Alpha proteobacteria.o\_Sphingomonadales.f\_Erythrobacteraceae

75000  
50000  
25000  
0

FDR: 1.103e-01  
Coefficient: -1.69e+04  
Value: omicron

alpha (n=25)

clade20C (n=1)

delta (n=13)

omicron (n=6)

neg (n=72)

NA

WHOvariant

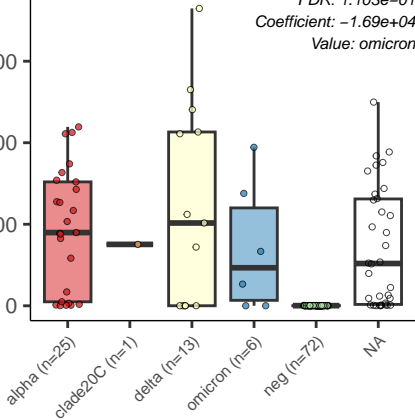

Neisseriaceae

FDR:  $1.110 \times 10^{-1}$   
Coefficient:  $-2.16 \times 10^2$   
Value: neg

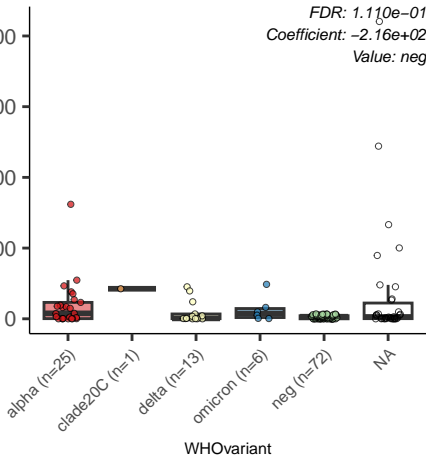



Negativicutes.o\_\_Selenomonadales.f\_\_Selenomonadaceae.g\_\_Se

FDR:  $1.115e-01$   
Coefficient:  $-2.78e+04$   
Value: neg

150000

100000

50000

0

alpha (n=25)

clade20C (n=1)

delta (n=13)

omicron (n=6)

neg (n=72)

NA

WHOvariant

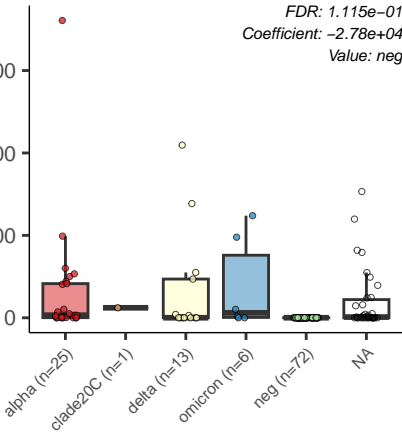

Actinomycetia.o\_\_Corynebacteriales.f\_\_Mycobacteriaceae.g\_\_My

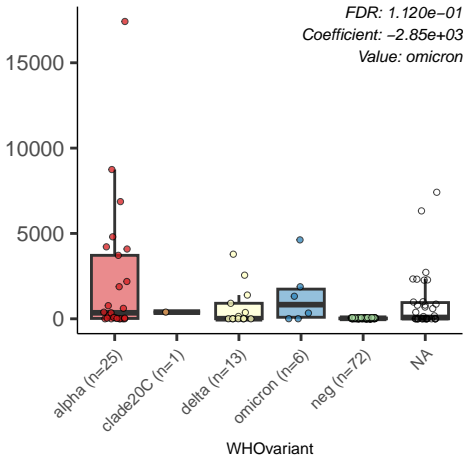

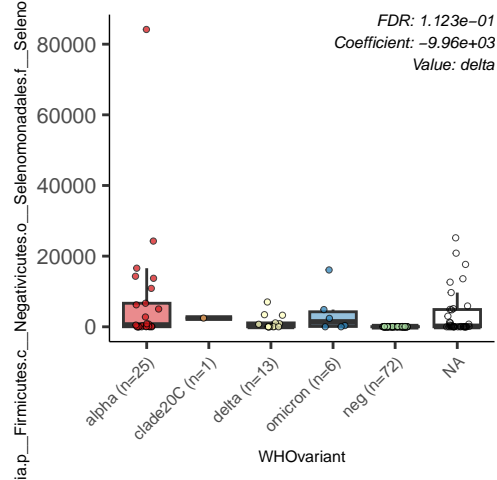

ites.c\_\_Negativicutes.o\_\_Selenomonadales.f\_\_Selenomonadaceae

FDR: 1.123e-01  
Coefficient: -9.96e+03  
Value: delta

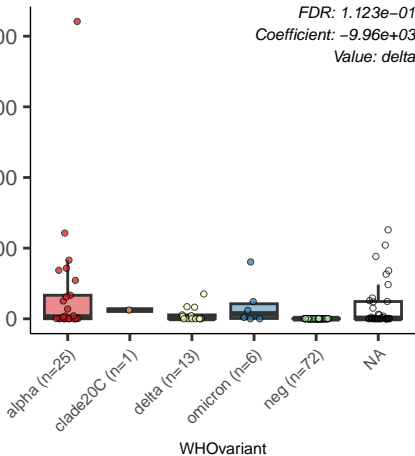

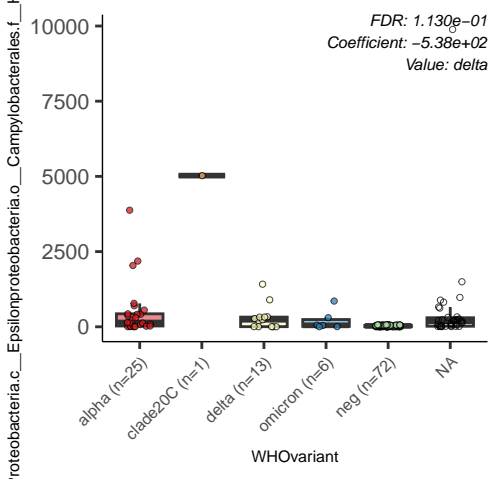

p\_\_Proteobacteria.c\_\_Betaproteobacteria.o\_\_Burkholderiales.f\_\_B

FDR:  $1.133\text{e-}01$   
Coefficient:  $-2.94\text{e+}04$   
Value: neg

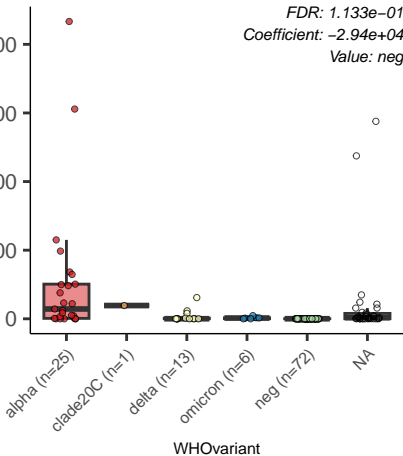

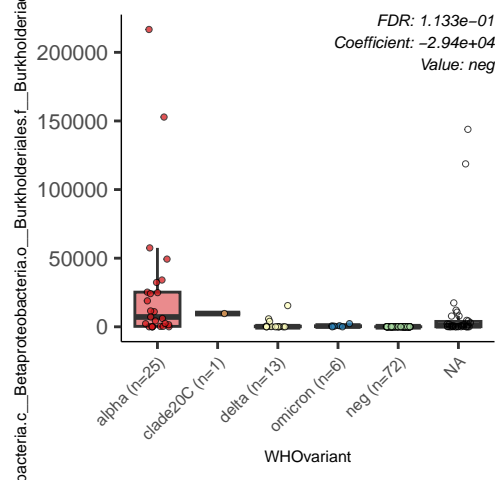

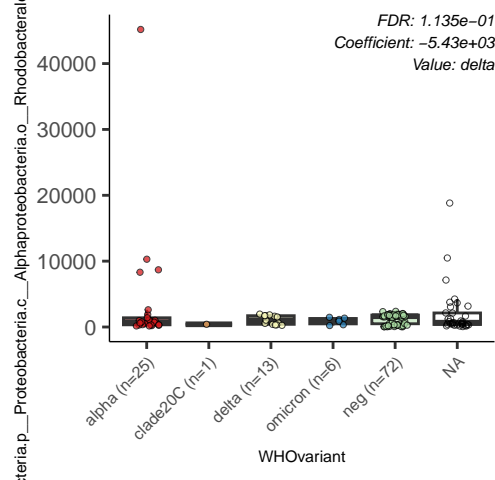



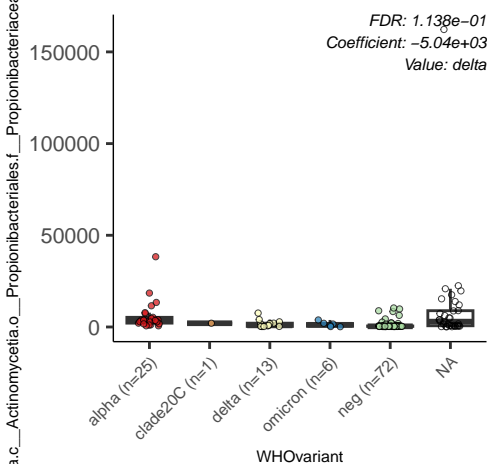

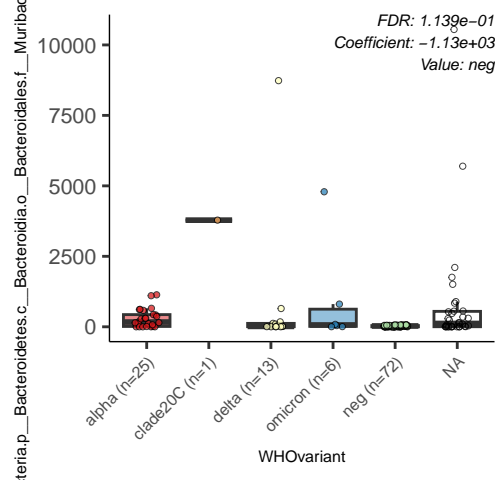

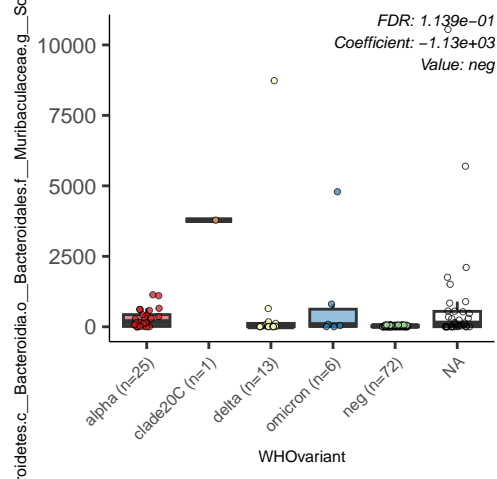

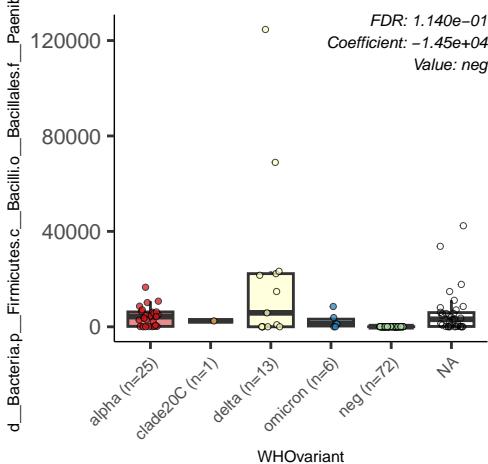

a.p\_Actinobacteria.c\_Actinomycetia.o\_Micrococcales.f\_Microb

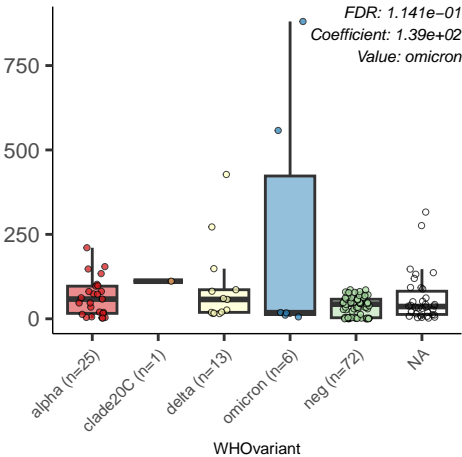

Bacteria.p\_Firmicutes.c\_Bacilli.o\_Bacillales.g\_Gemella.s

FDR: 1.144e-01  
Coefficient: 4.01e+03  
Value: delta

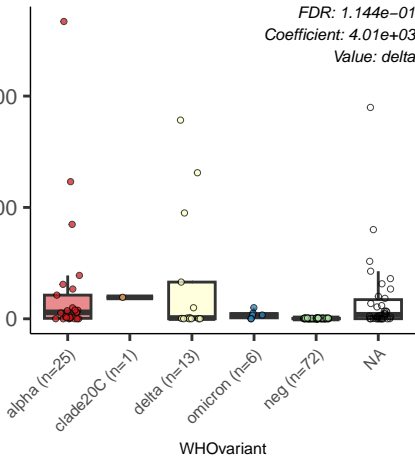

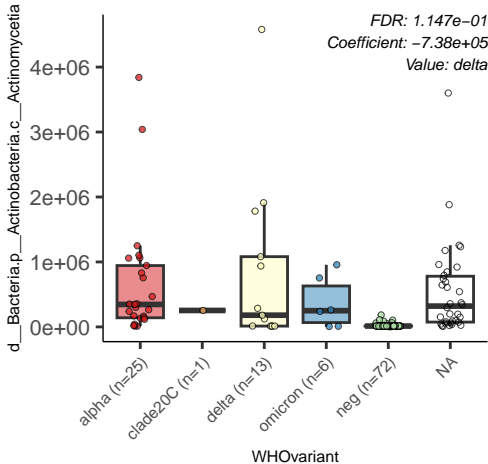

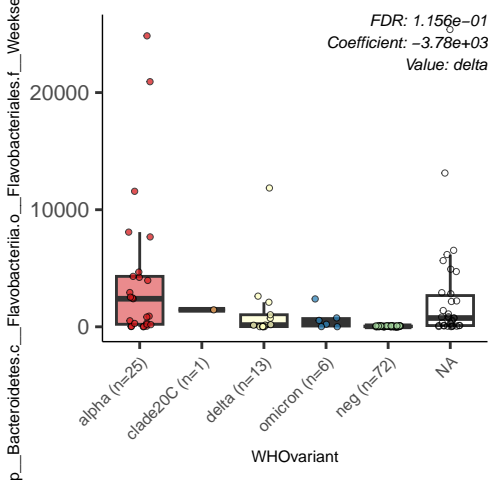



FDR:  $1.158e-01$   
Coefficient:  $-3.68e+02$   
Value: omicron

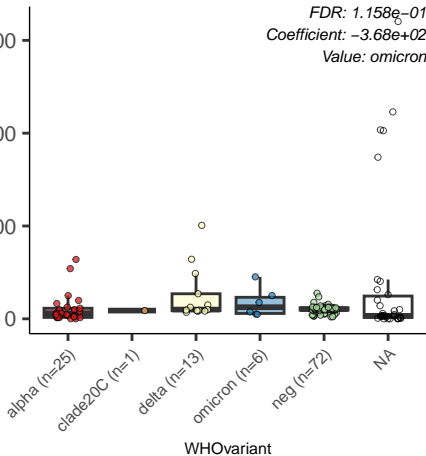

s.c\_\_Clostridia.o\_\_Eubacteriales.f\_\_Eubacteriales.Family.XIII.Ince

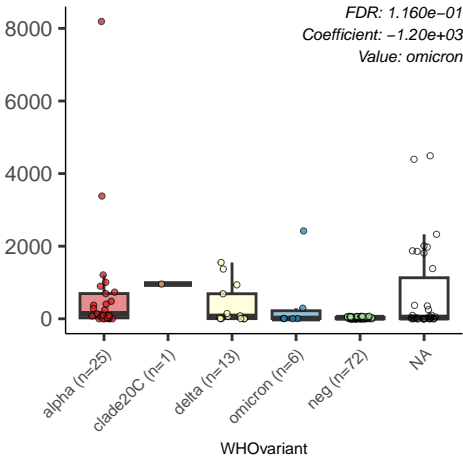

d\_\_Bacteria.p\_\_Candidatus.Saccharibacteria.g\_\_Candidatus.

FDR:  $1.169 \times 10^{-1}$   
Coefficient:  $-4.98 \times 10^2$   
Value: omicron

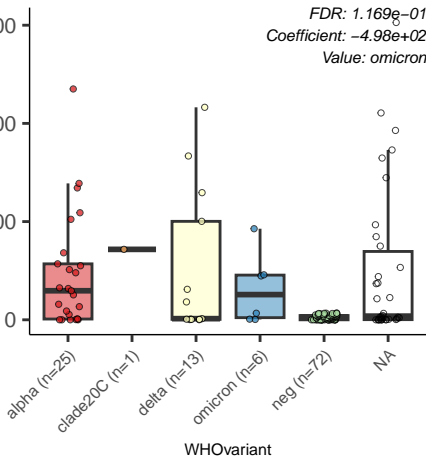



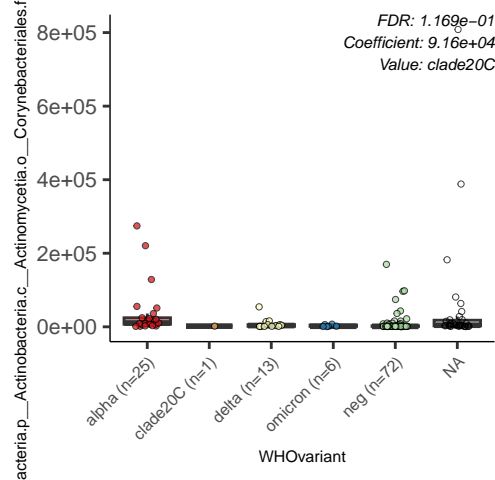

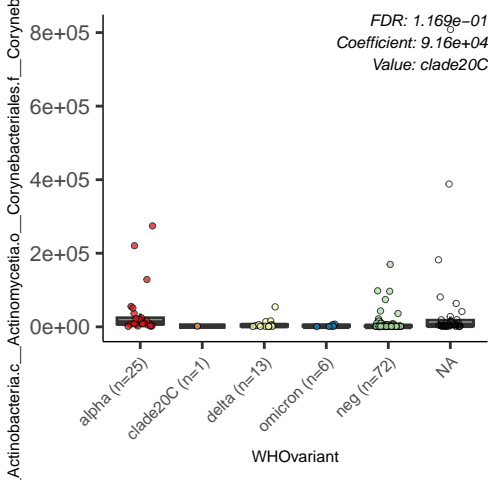

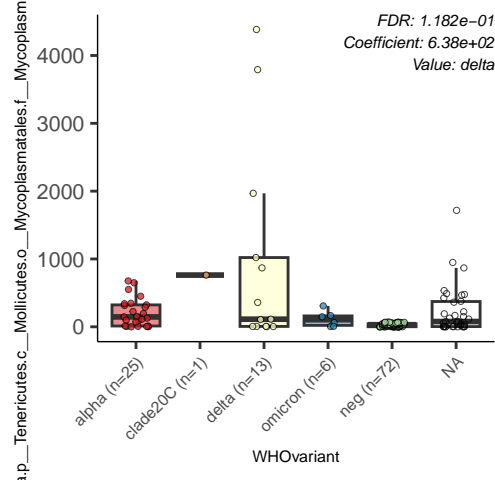

ria.p\_Actinobacteria.c\_Actinomycetia.o\_Micrococcales.f\_Micro

FDR:  $1.185e-01$   
Coefficient:  $-1.82e+03$   
Value: omicron

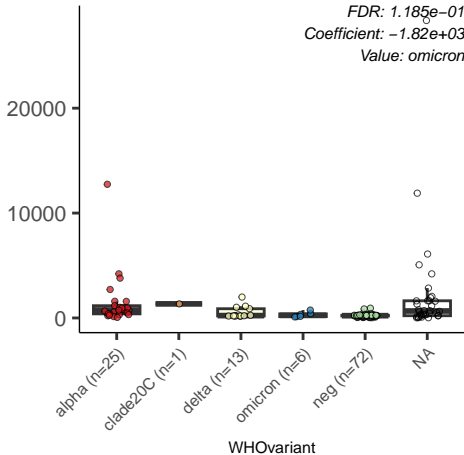



\_Epsilonproteobacteria.o\_\_Campylobacteriales.f\_\_Campylobacterac

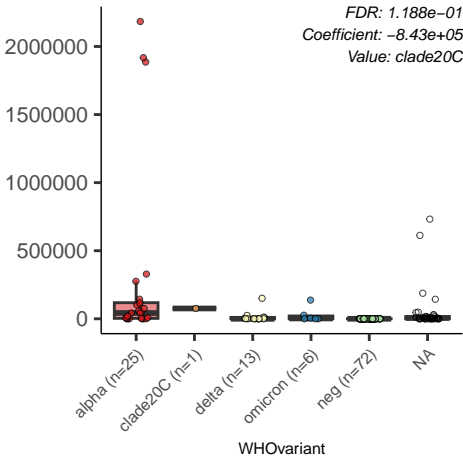

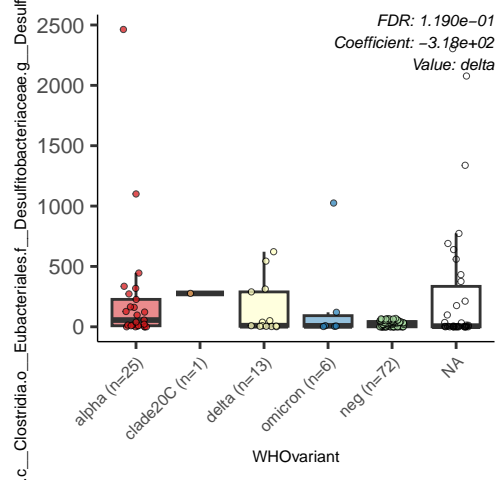

proteobacteria.c\_\_Betaproteobacteria.o\_\_Neisseriales.f\_\_Neisseriaceae

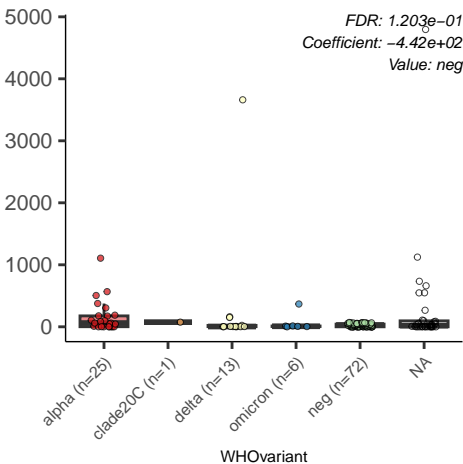

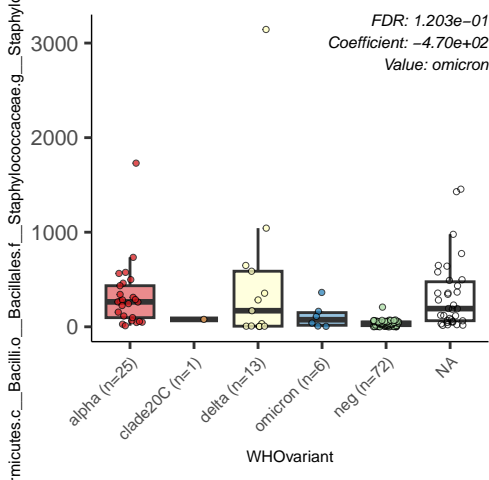

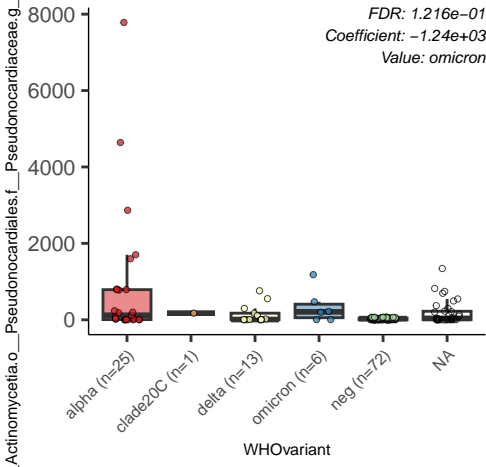

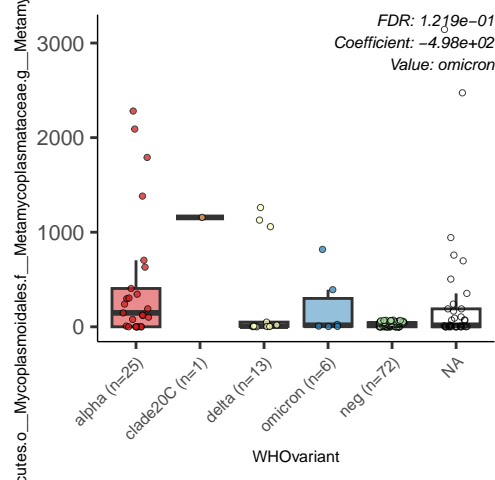

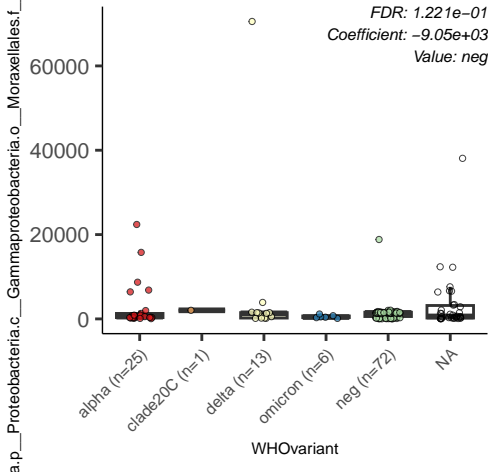

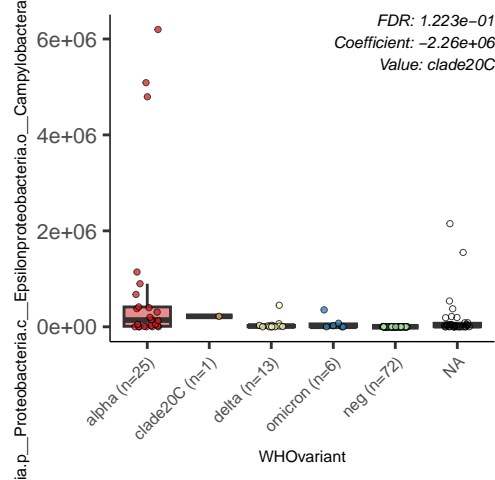



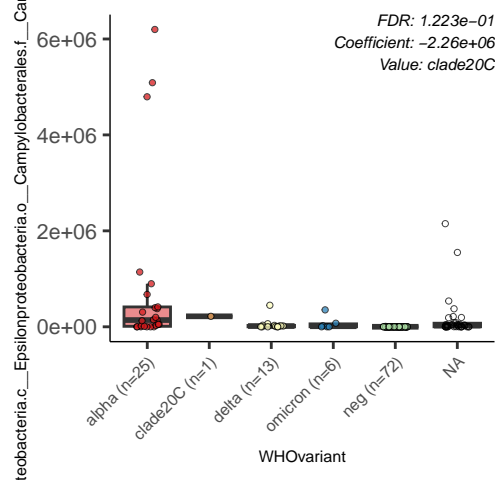

acteria.p\_\_Firmicutes.c\_\_Bacilli.o\_\_Bacillales.f\_\_Staphylococcaceae

FDR:  $1.224e-01$   
Coefficient:  $7.71e+01$   
Value: delta

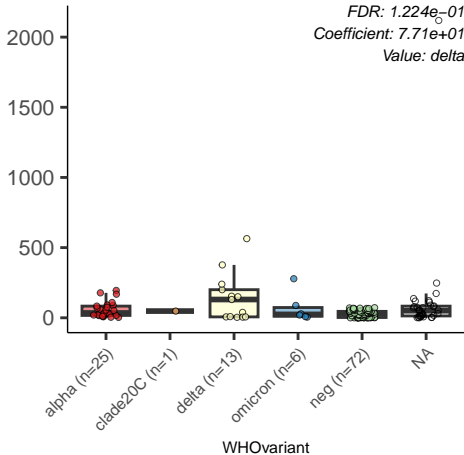

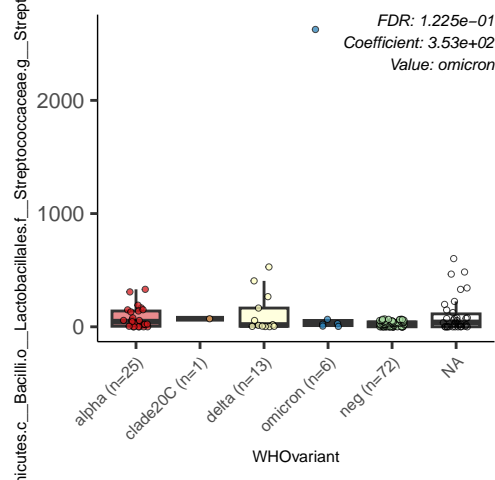

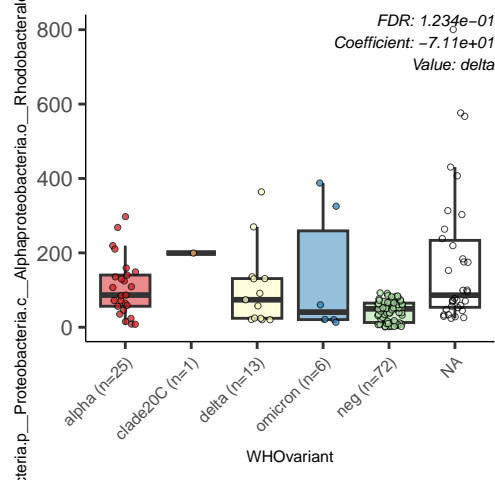

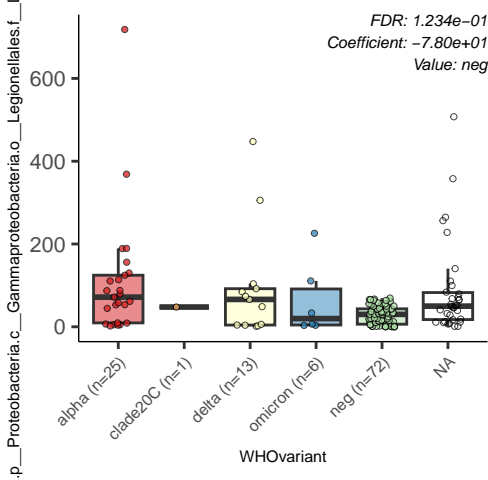

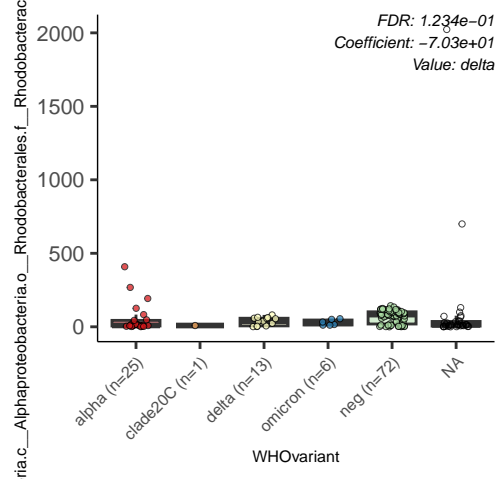

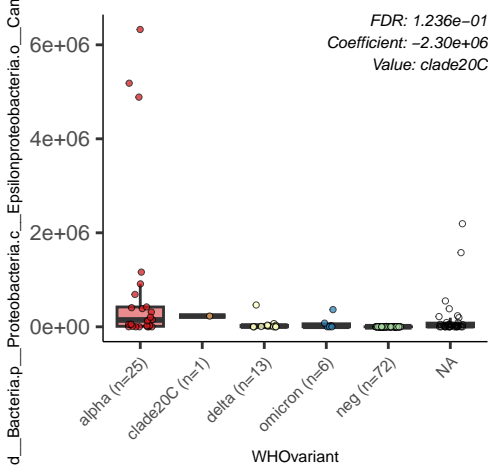

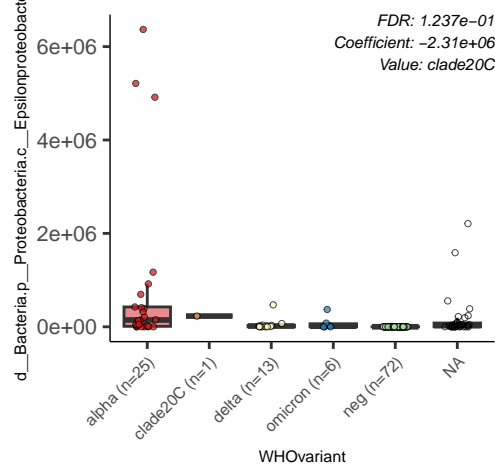



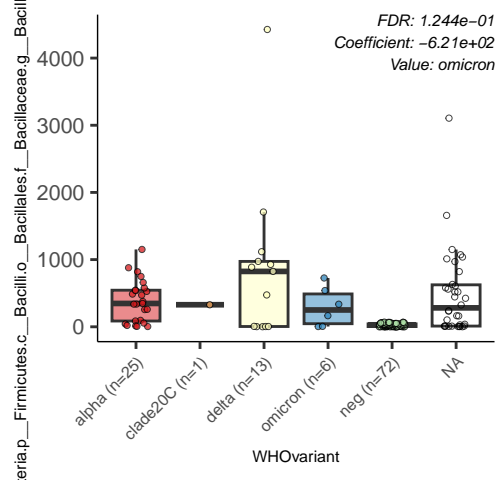

s.c\_\_Bacteroidia.o\_\_Bacteroidales.f\_\_Porphyromonadaceae.g\_\_Po

FDR:  $1.245e-01$   
Coefficient:  $-1.31e+02$   
Value: delta

1000

500

0

alpha (n=25)

clade20C (n=1)

delta (n=13)

omicron (n=6)

neg (n=72)

NA

WHOvariant

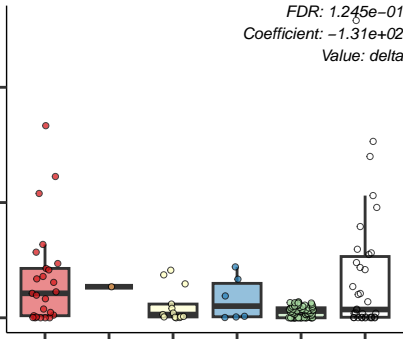

Firmicutes.c\_\_Clostridia.o\_\_Eubacteriales.f\_\_Eubacteriales.Family

FDR: 1.249e-01  
Coefficient: -5.06e+03  
Value: omicron

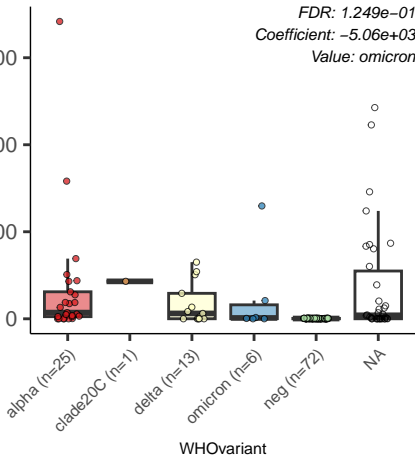

Chlamydiae.c\_\_Chlamydia.o\_\_Chlamydiales.f\_\_Chlamydiaceae.g

FDR: 1.251e-01  
Coefficient: -5.26e+03  
Value: delta

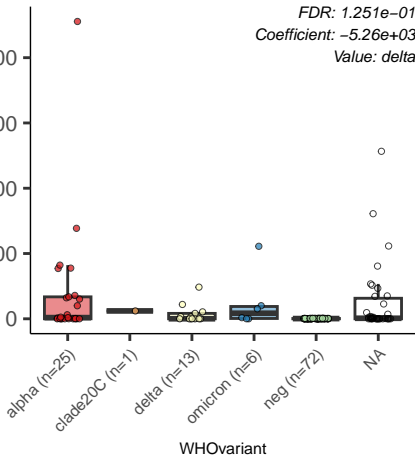

ia.p\_\_Bacteroidetes.c\_\_Flavobacteriia.o\_\_Flavobacteriales.f\_\_Flavo

FDR: 1.255e-01  
Coefficient: -2.45e+02  
Value: omicron

1000

500

0

alpha (n=25)

clade20C (n=1)

delta (n=13)

omicron (n=6)

neg (n=72)

NA

WHOvariant

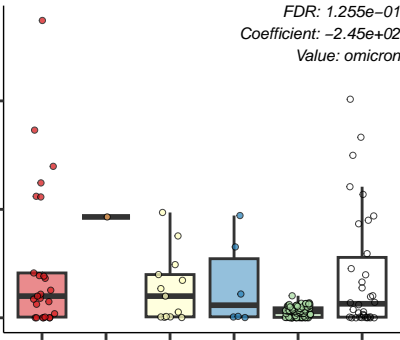

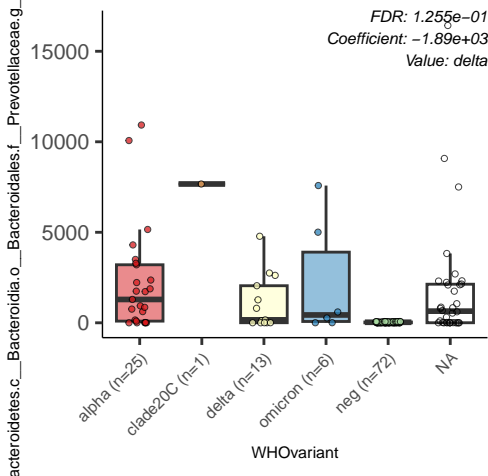

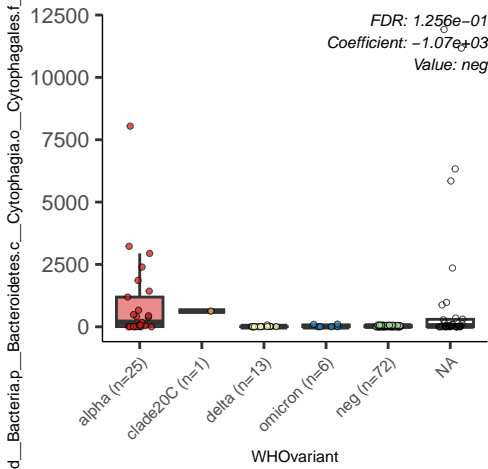

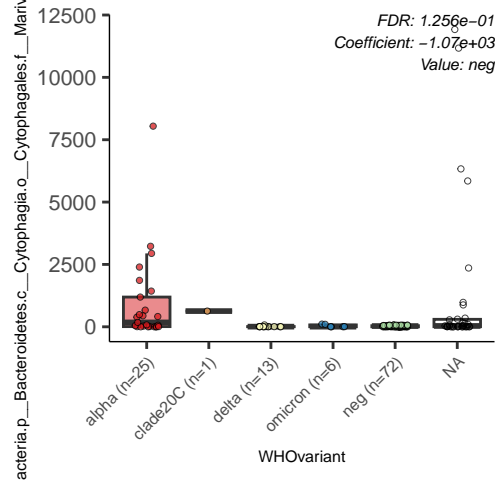



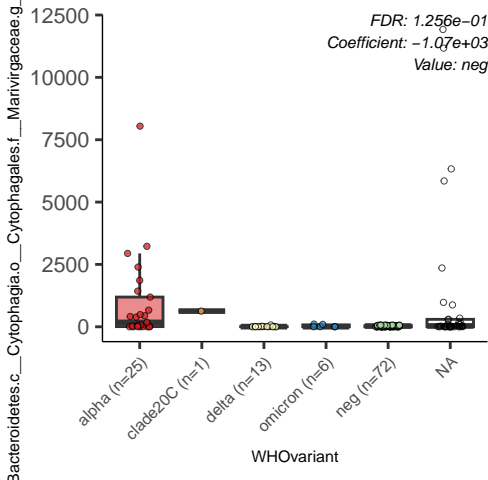

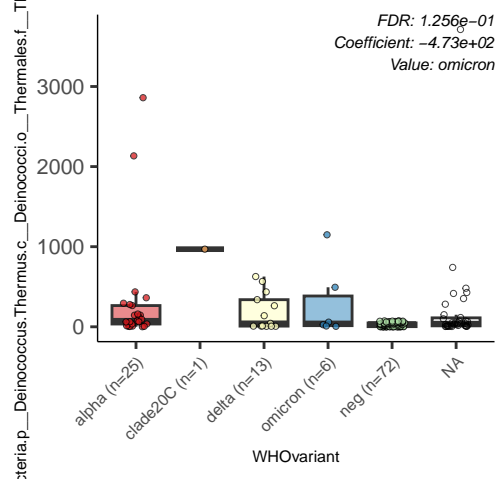

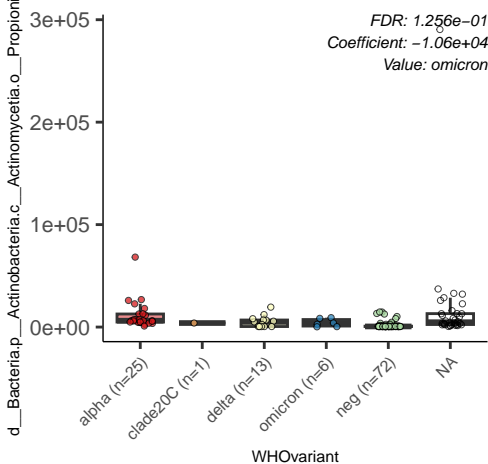

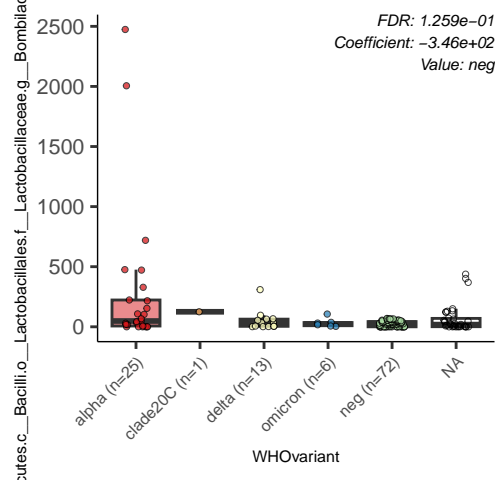

Actinobacteria.c\_Actinomycetia.o\_Actinomycetales.f\_Actinom

FDR: 1.268e-01  
Coefficient: -9.78e+03  
Value: omicron

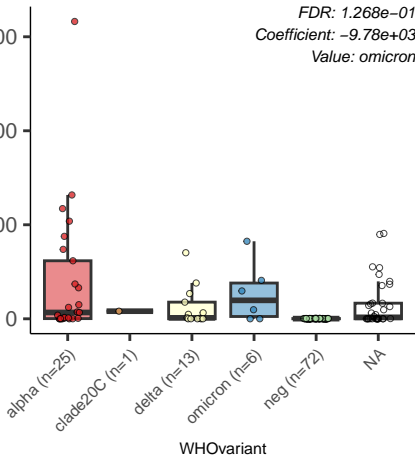

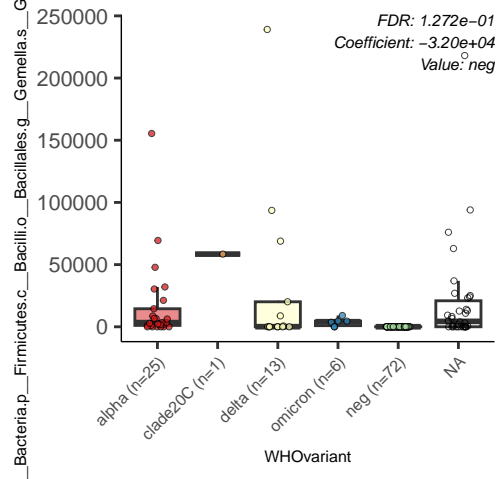

d\_Bacteria.p\_Spirochaetes.c\_Spirochaetia.o\_Spirochaetales

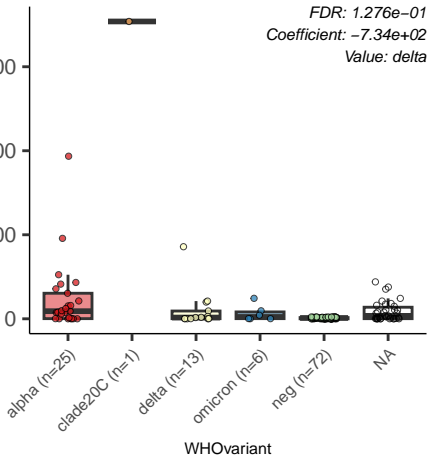

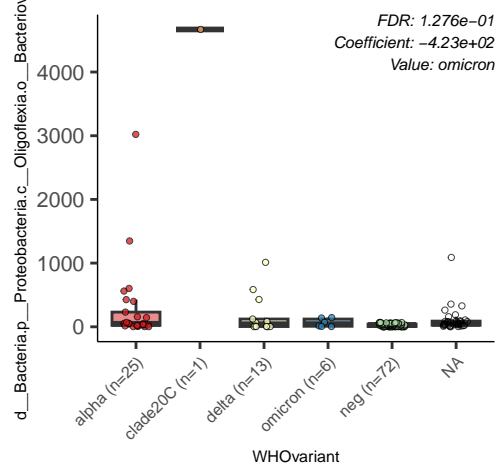



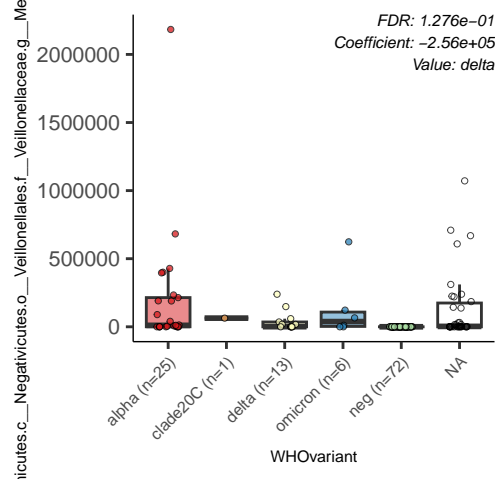

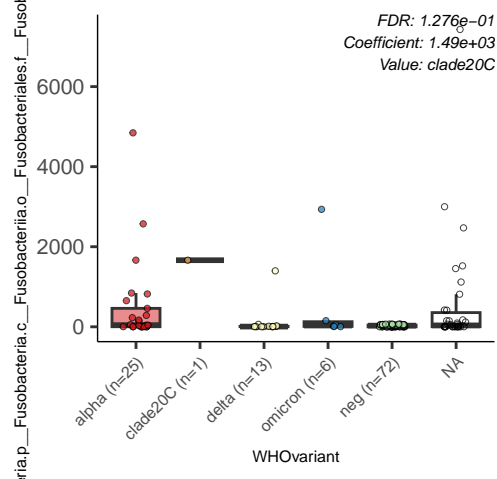

bacteria.c\_\_Fusobacteriia.o\_\_Fusobacteriales.f\_\_Fusobacteriaceae

FDR:  $1.276 \times 10^{-1}$   
Coefficient:  $1.49 \times 10^3$   
Value: clade20C

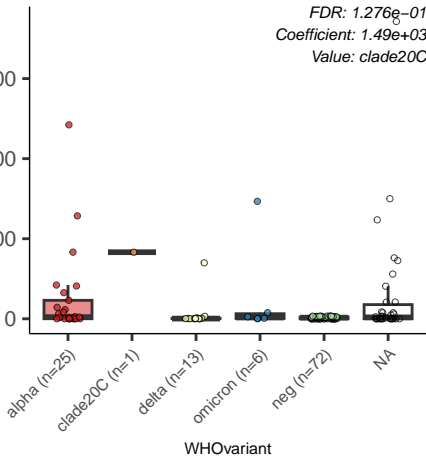

rmicutes.c\_\_Bacilli.o\_\_Lactobacillales.f\_\_Streptococcaceae.g\_\_Stre

FDR: 1.278e-01  
Coefficient: -1.34e+03  
Value: neg

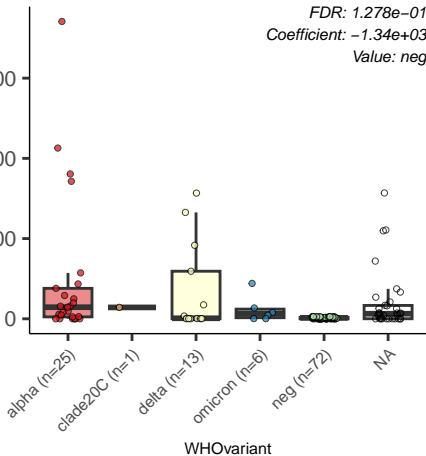

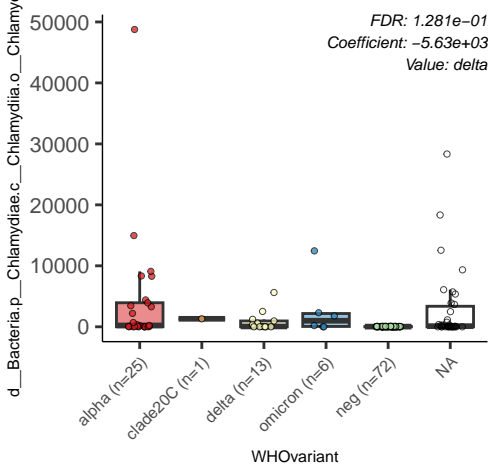

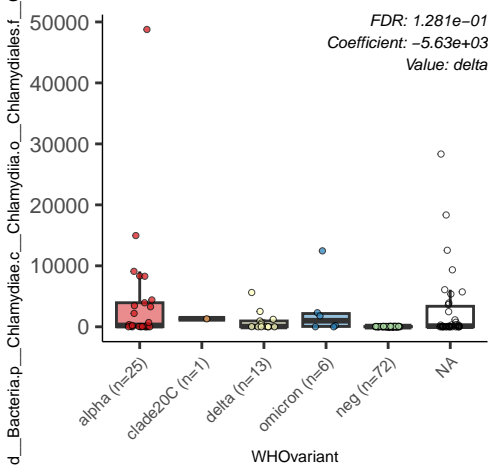

d\_Bacteria.p\_\_Proteobacteria.c\_\_Deltaproteobacteria.o\_\_Desul

FDR: 1.281e-01  
Coefficient: -4.30e+02  
Value: neg

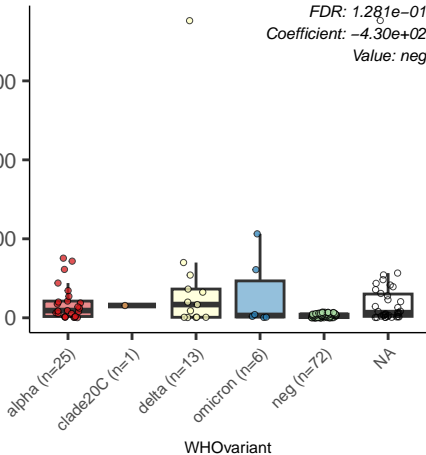

obacteria.c\_\_Fusobacteriia.o\_\_Fusobacteriales.f\_\_Leptotrichiaceae

FDR:  $1.285e-01$   
Coefficient:  $-8.76e+02$   
Value: omicron

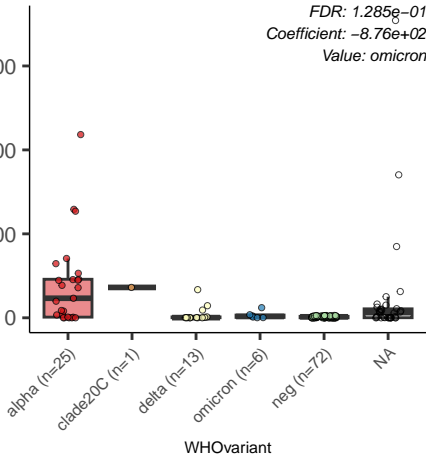



acteria.p\_\_Proteobacteria.c\_\_Deltaproteobacteria.o\_\_Desulfobactera

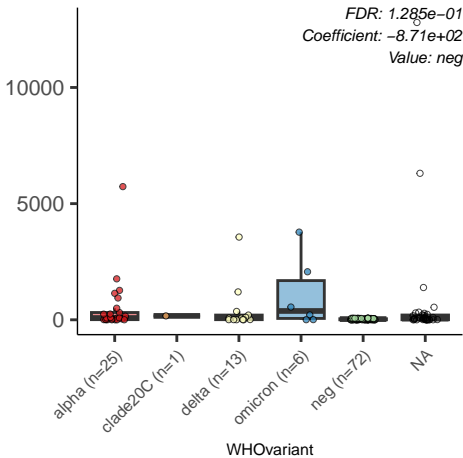

Bacteroidetes.c\_\_Bacteroidia.o\_\_Bacteroidales.f\_\_Prevotellaceae.g

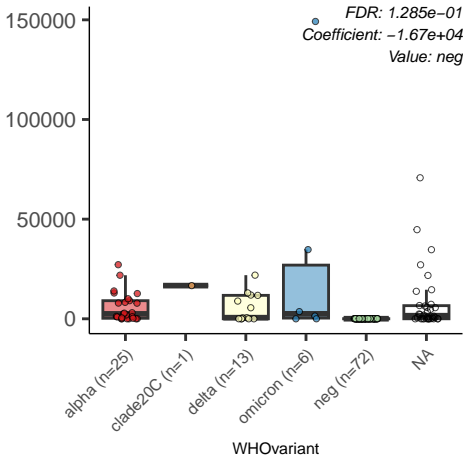

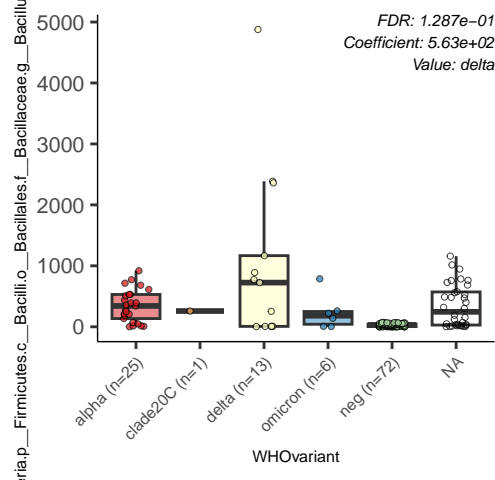

c\_Flavobacteriia.o\_Flavobacteriales.f\_Flavobacteriaceae.g\_Ca

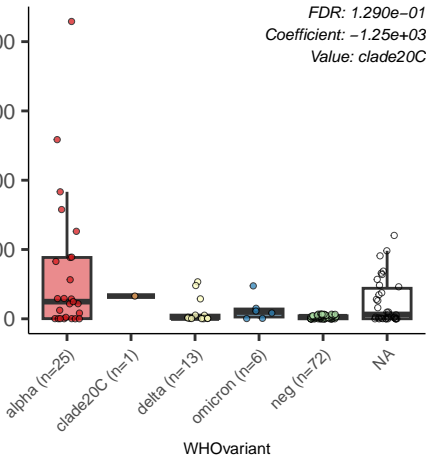

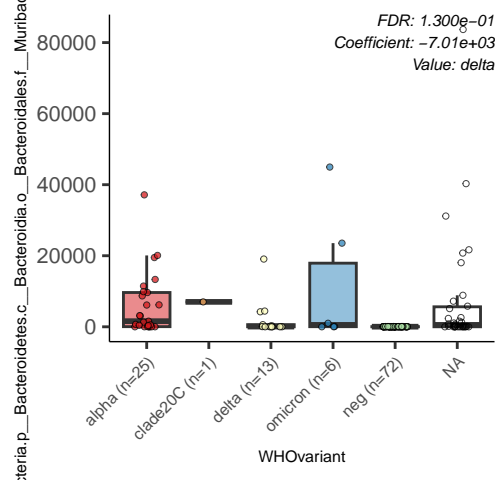

Value: delta

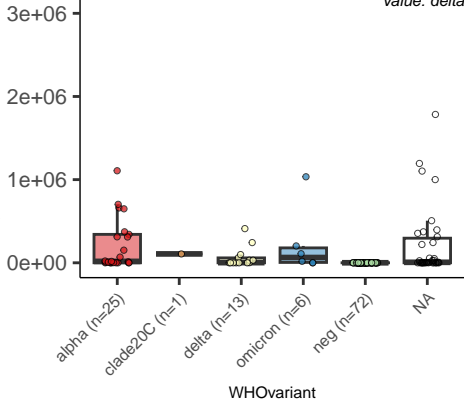

d\_Bacteria.p\_\_Firmicutes.c\_\_Bacilli.o\_\_Bacillales.f\_\_Bacillaceae

FDR:  $1.308e-01$   
Coefficient:  $-6.57e+01$   
Value: omicron

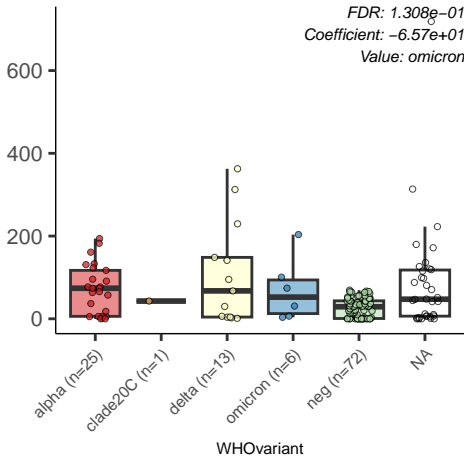

p\_Firmicutes.c\_Bacilli.o\_Bacillales.f\_Bacillaceae.g\_Weizmann

FDR:  $1.308e-01$   
Coefficient:  $-6.57e+01$   
Value: omicron

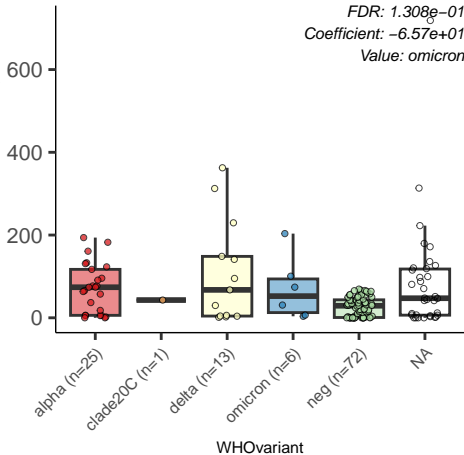



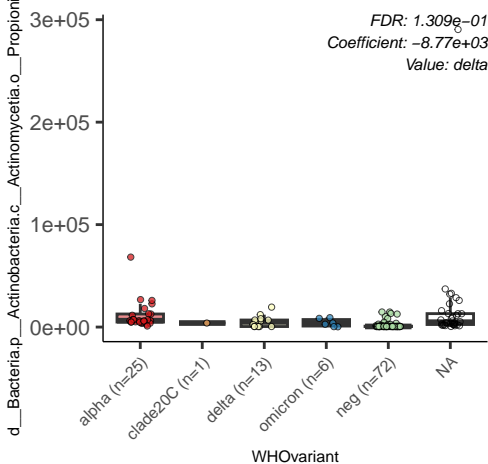

a.p\_\_Bacteroidetes.c\_\_Bacteroidia.o\_\_Bacteroidales.f\_\_Dysgonom

*FDR: 1.318e-01*  
*Coefficient: -2.82e+02*  
*Value: neg*

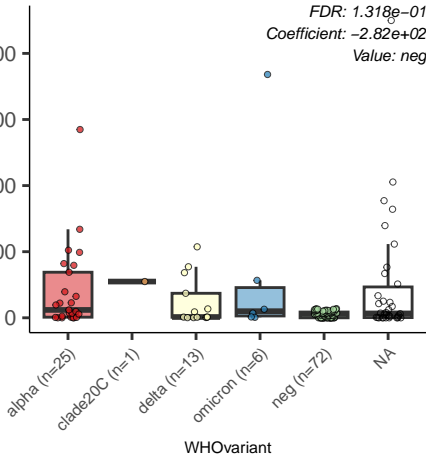

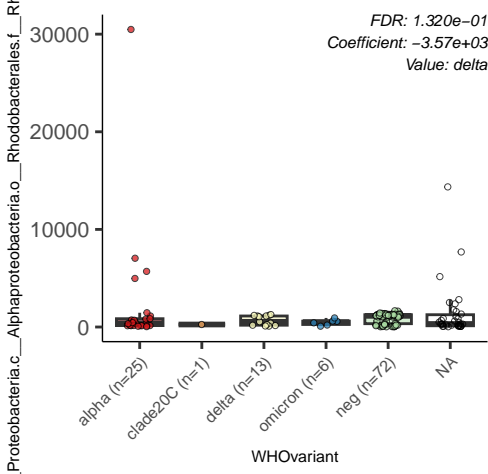

Bacteroidetes.c\_\_Bacteroidia.o\_\_Bacteroidales.f\_\_Prevotellaceae

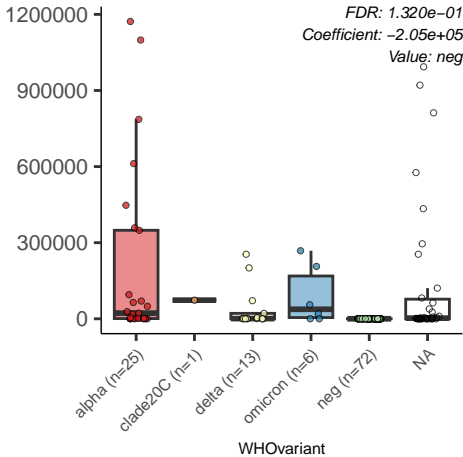

FDR:  $1.321e-01$   
Coefficient:  $-1.96e+02$   
Value: neg

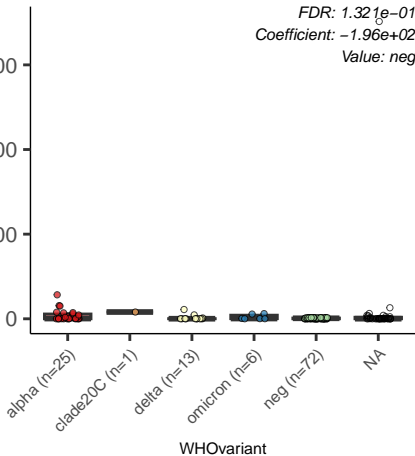

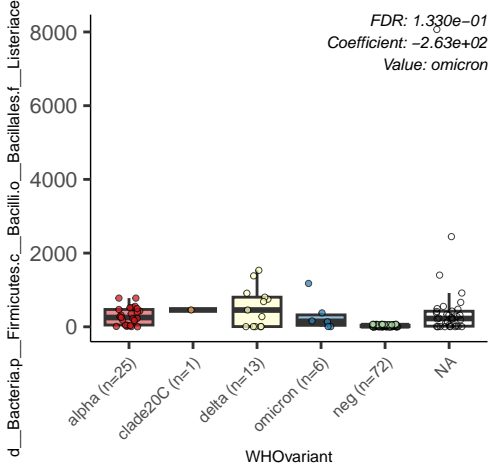

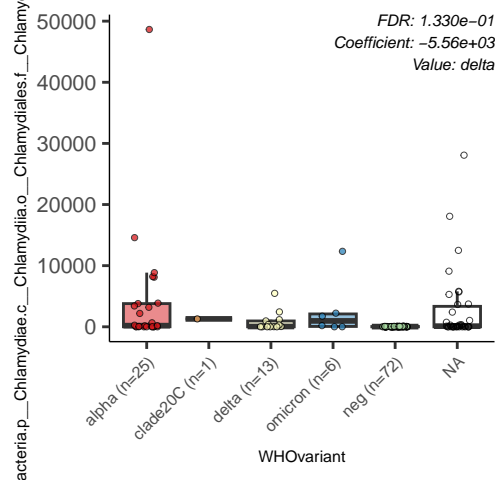

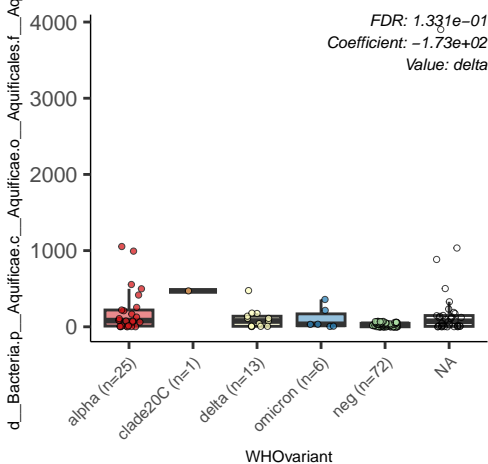



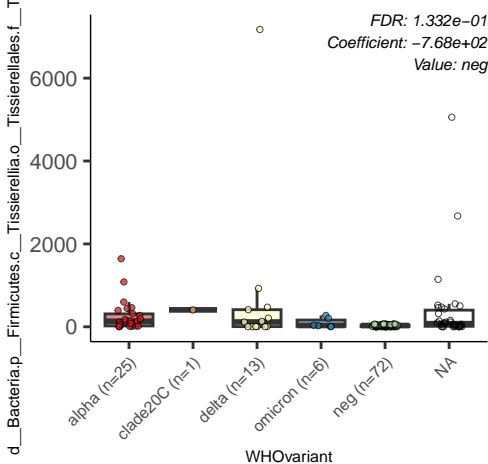

FDR:  $1.339e-01$   
Coefficient:  $-4.54e+03$   
Value: omicron

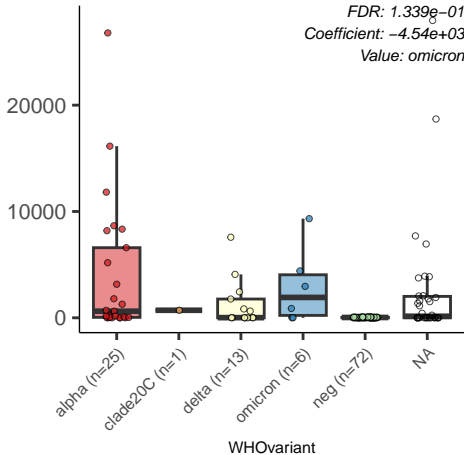

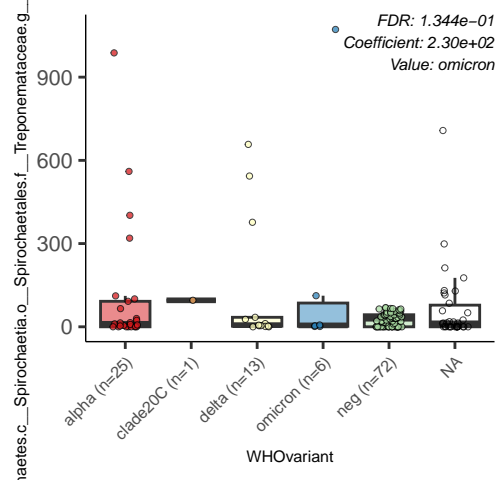

a.c.\_Gammaproteobacteria.o\_Pasteurellales.f\_\_Pasteurellaceae.g

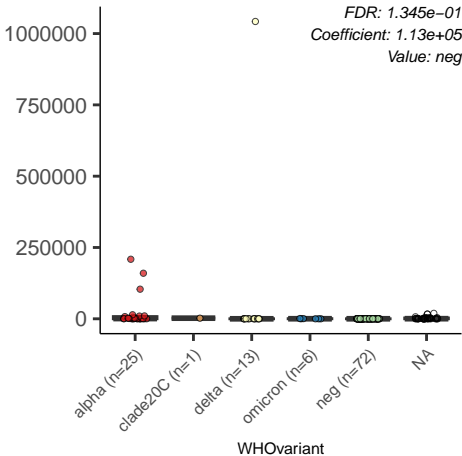

Clostridia.o\_\_Eubacteriales.f\_\_Christensenellaceae.g\_\_Christens

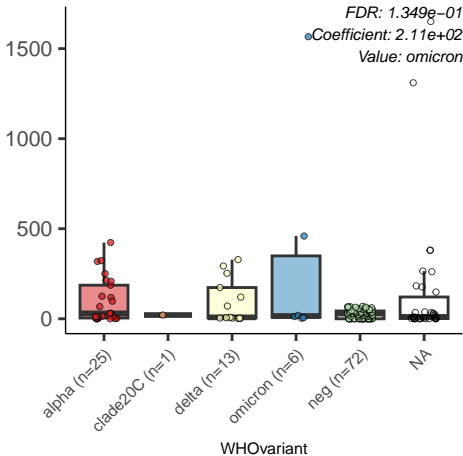

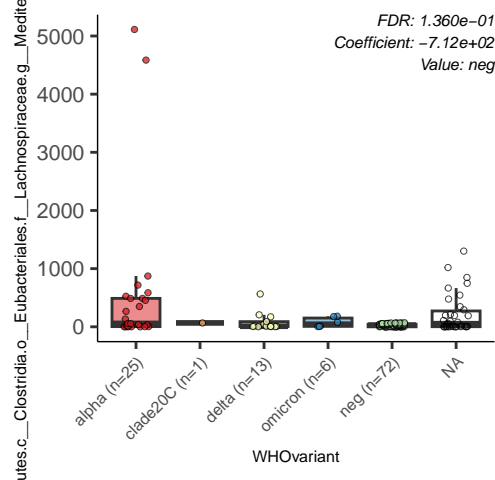

terial.p\_\_Firmicutes.c\_\_Bacilli.o\_\_Bacillales.f\_\_Thermoactinomyce

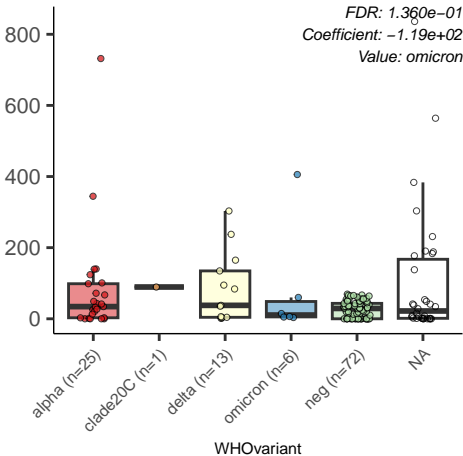

Bacteria.p\_Firmicutes.c\_Bacilli.o\_Bacillales.g\_Gemella.s\_Ge

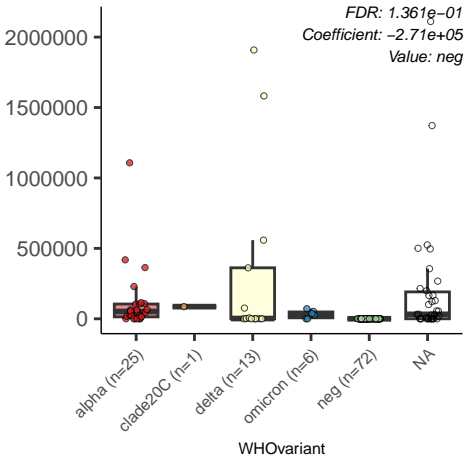



Bacteroidetes.c\_\_Bacteroidia.o\_\_Bacteroidales.f\_\_Bacteroidaceae.g

FDR: 1.362e-01  
Coefficient: -6.96e+02  
Value: neg

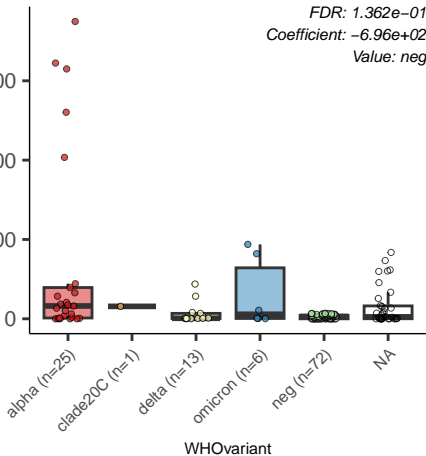

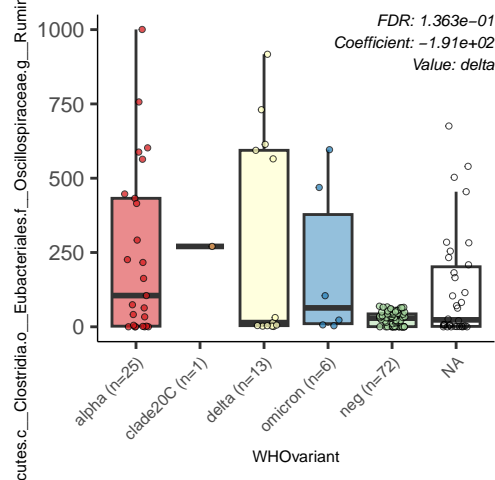

Proteobacteria.c\_\_Deltaproteobacteria.o\_\_Desulfobacterales.f\_\_De

*FDR: 1.365e-01*  
*Coefficient: -8.53e+02*  
*Value: neg*

10000

5000

0

alpha (n=25)

clade20C (n=1)

delta (n=13)

omicron (n=6)

neg (n=72)

NA

WHOvariant

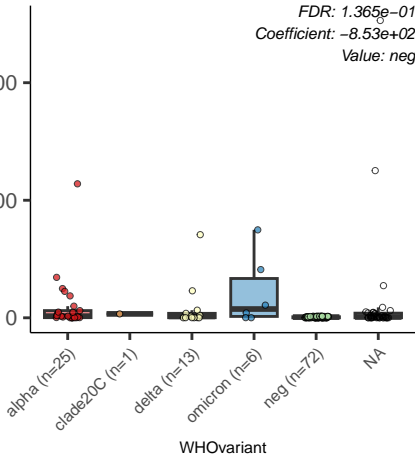

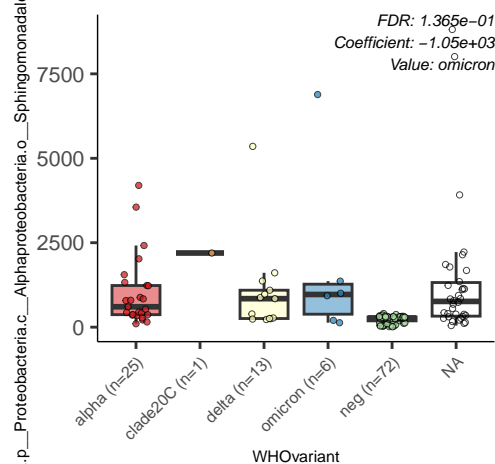

Actinomycetia.o\_\_Corynebacteriales.f\_\_Corynebacteriaceae.g\_\_C

FDR:  $1.365e-01$   
Coefficient:  $-1.45e+02$   
Value: neg

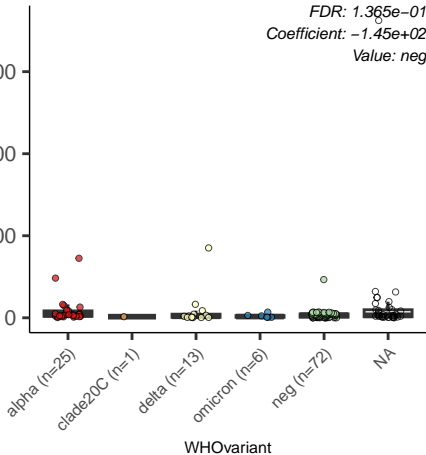

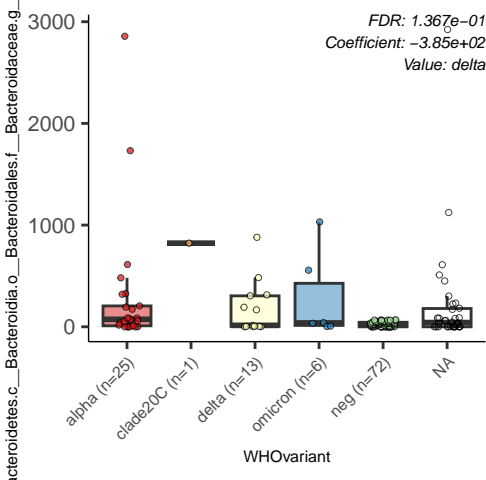

c\_\_Clostridia.o\_\_Eubacteriales.f\_\_Desulfotobiaceae.g\_\_Desulf

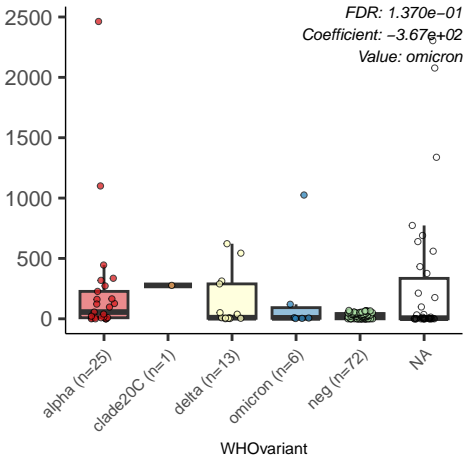





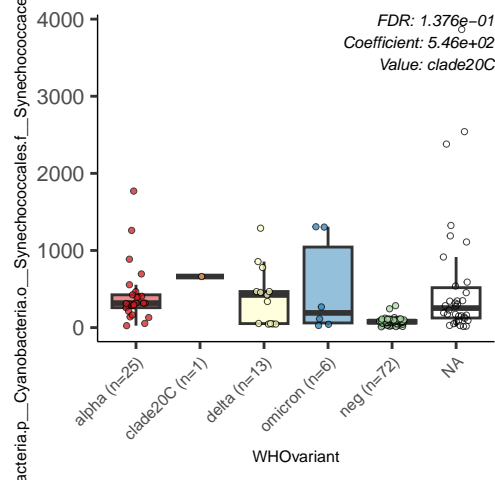

acteria.p\_\_Firmicutes.c\_\_Bacilli.o\_\_Lactobacillales.f\_\_Lactobacillaceae

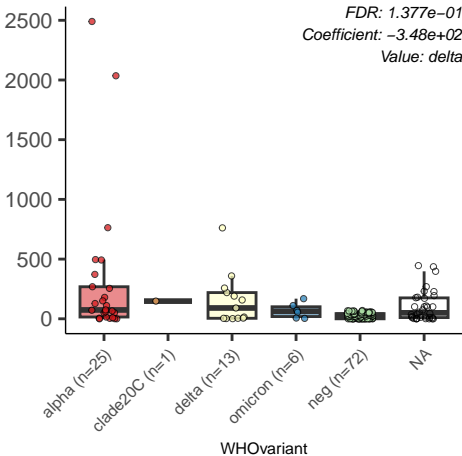

ativicutes.o\_\_Acidaminococcales.f\_\_Acidaminococcaceae.g\_\_Phas

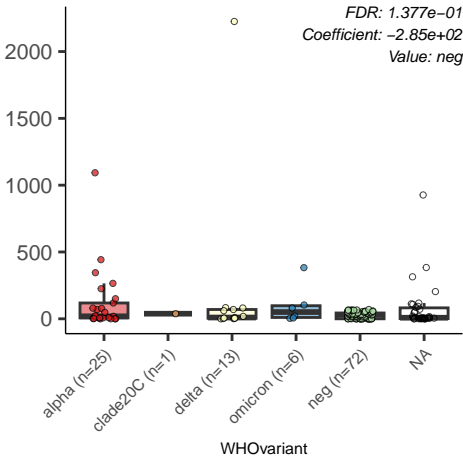

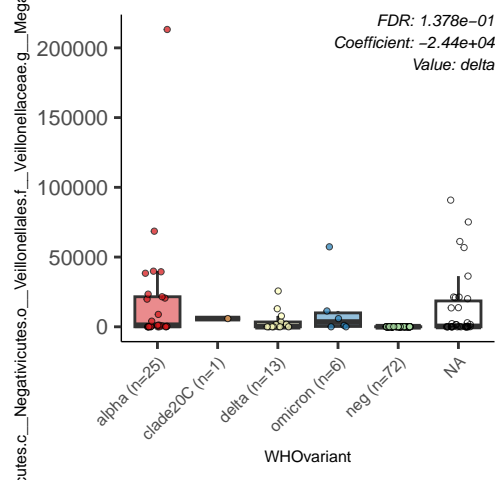

Bacteria.p\_\_Proteobacteria.c\_\_Betaproteobacteria.o\_\_Burkholderia

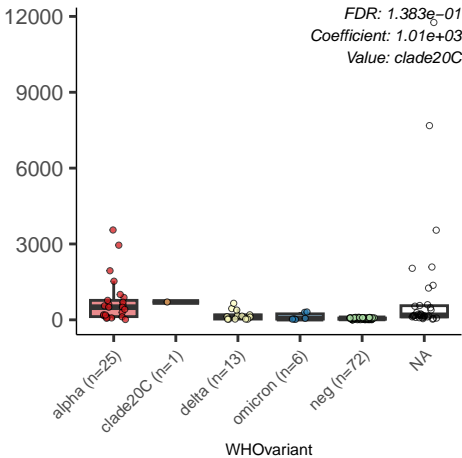

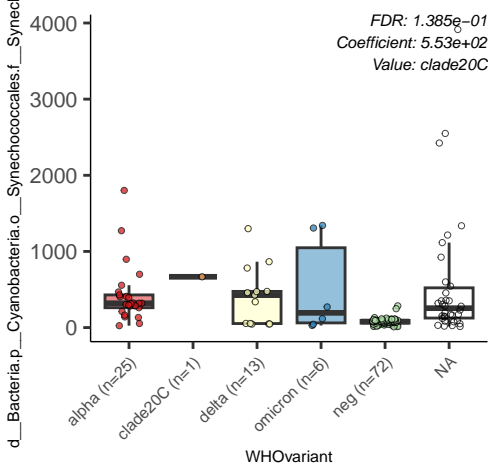

phylum: Bacteroidetes, class: Sphingobacteriia, order: Sphingobacteriales, family: Sphingobacteriaceae, genus: Sphingobacterium, species: Sphingobacterium

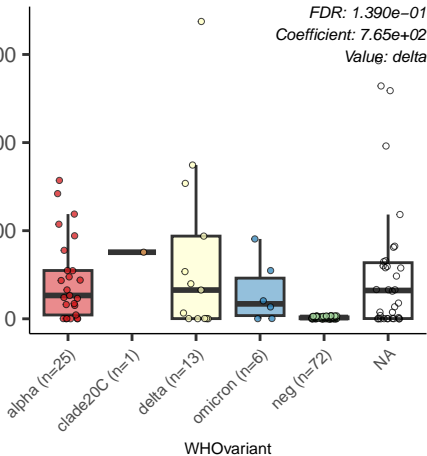

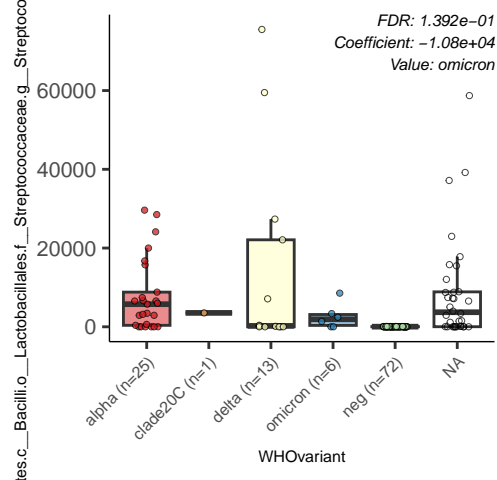



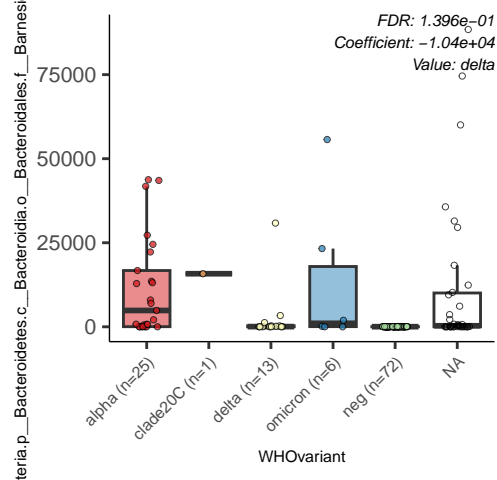

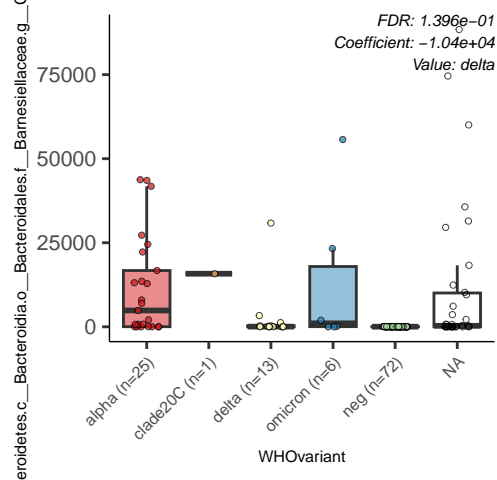

Bacteroidetes.c\_\_Bacteroidia.o\_\_Bacteroidales.f\_\_Bacteroidaceae.g

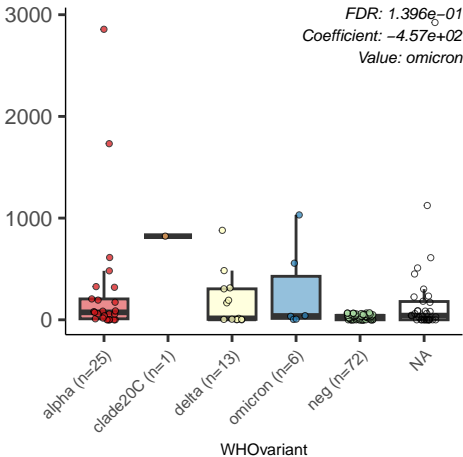

Value: omicron

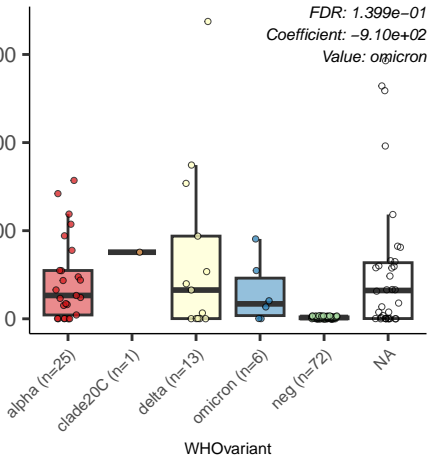

bacteria.p\_\_Proteobacteria.c\_\_Gammaproteobacteria.o\_\_Alteromonas

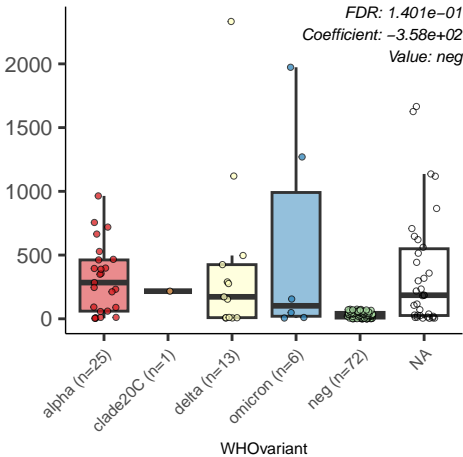

s.c.\_Bacilli.o\_Lactobacillales.f\_Streptococcaceae.g\_Streptococ

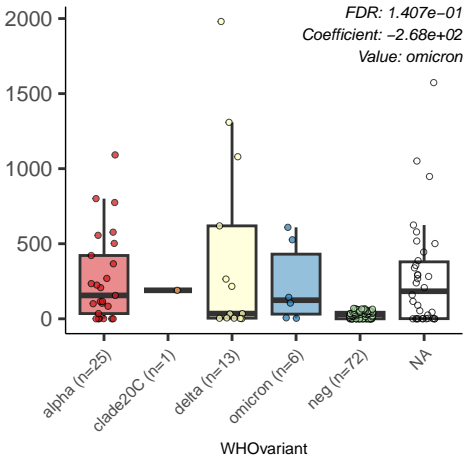

tes.c\_\_Bacilli.o\_\_Bacillales.f\_\_Staphylococcaceae.g\_\_Staphylococcus

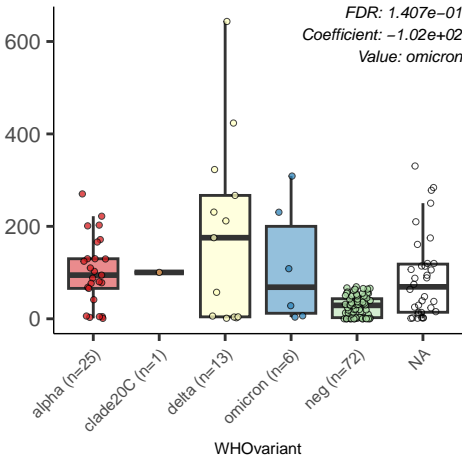

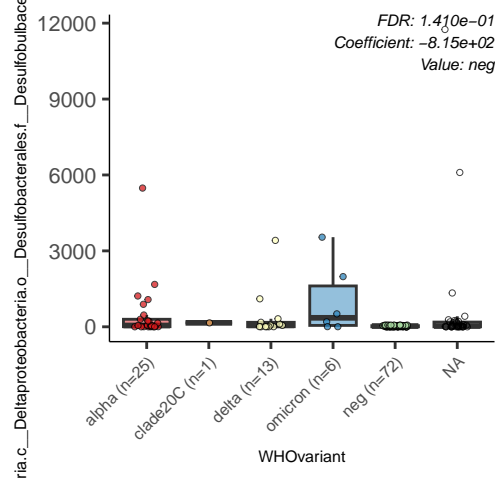



tes.c\_Flavobacteriia.o\_Flavobacteriales.f\_Weeksellaceae.g\_CH

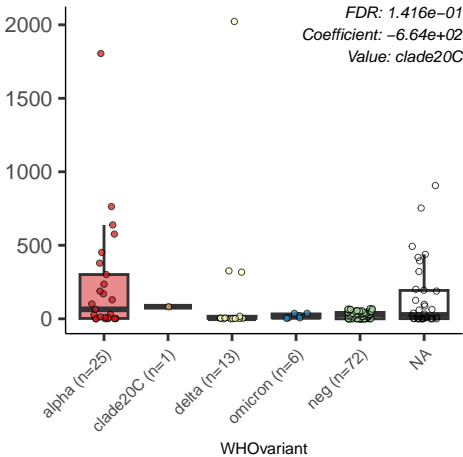

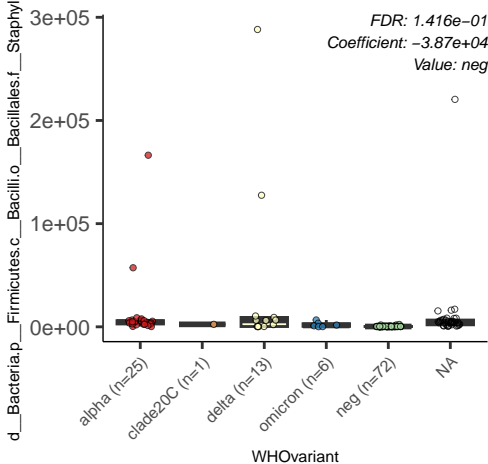

nicutes.c\_\_Bacilli.o\_\_Lactobacillales.f\_\_Streptococcaceae.g\_\_Strep

FDR:  $1.424e-01$   
Coefficient:  $-2.16e+03$   
Value: omicron

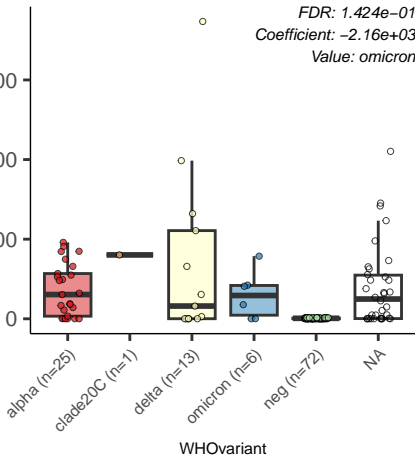

c\_\_Clostridia.o\_\_Eubacteriales.f\_\_Eubacteriales.Family.XIII...Incerta

FDR:  $1.431e-01$   
Coefficient:  $-2.60e+02$   
Value: omicron

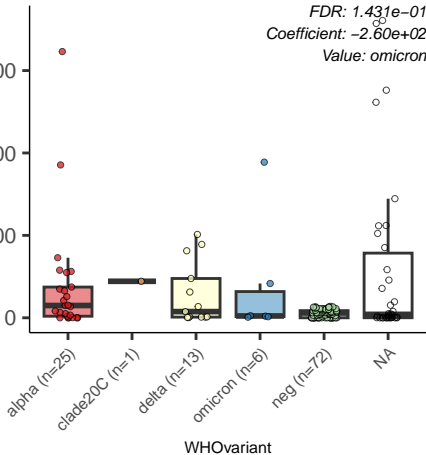

rmicutes.c\_\_Bacilli.o\_\_Lactobacillales.f\_\_Streptococcaceae.g\_\_Stre

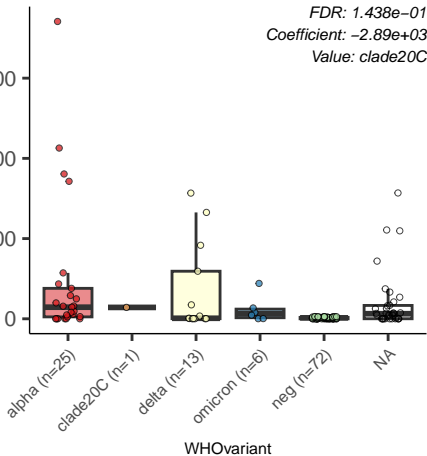

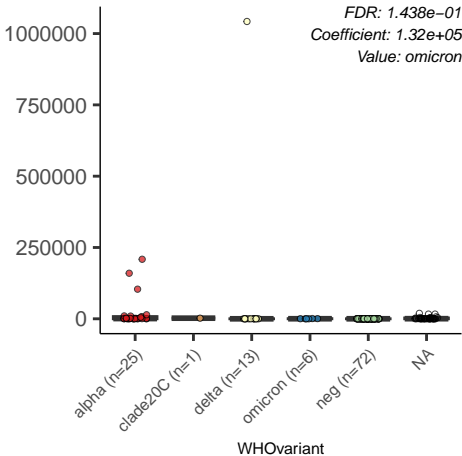

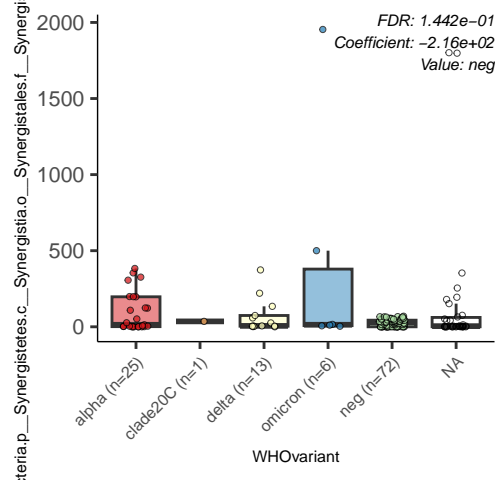

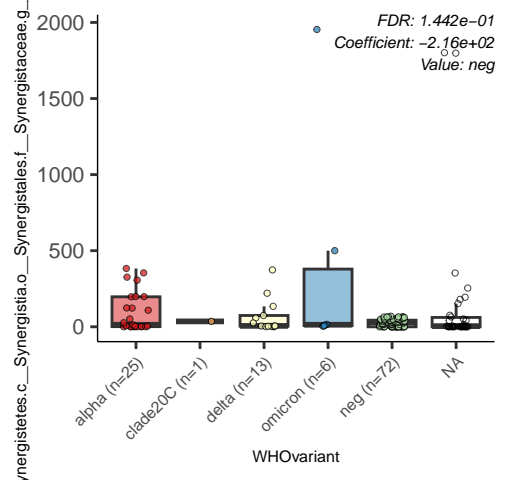



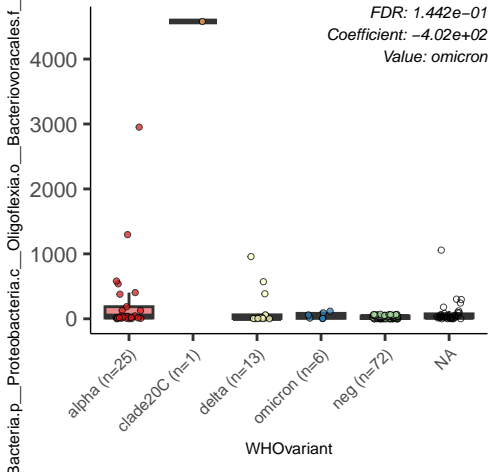

\_Proteobacteria.c\_\_Oligoflexia.o\_\_Bacteriovoracales.f\_\_Halobacter

FDR:  $1.442e-01$   
Coefficient:  $-4.02e+02$   
Value: omicron

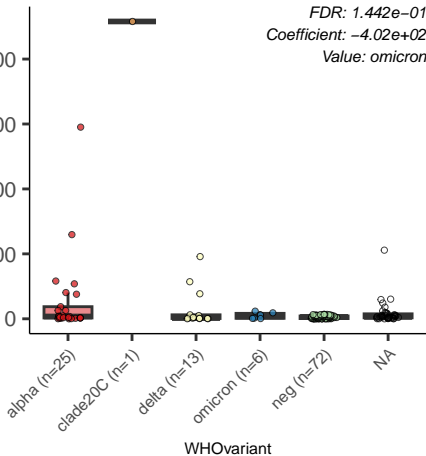

bacteria.p\_\_Proteobacteria.c\_\_Gammaproteobacteria.o\_\_Alteromonad

FDR: 1.442e-01  
Coefficient: 4.20e+02  
Value: omicron

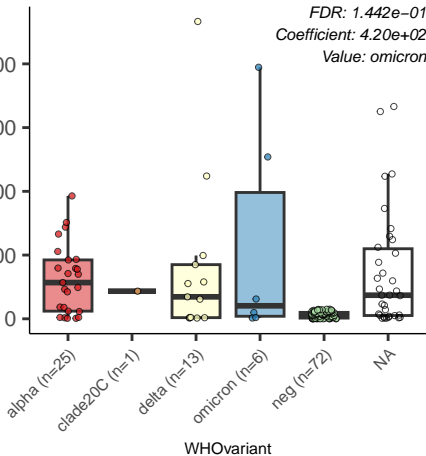

d\_\_Bacteria.p\_\_Cyanobacteria.o\_\_Oscillatoriales.f\_\_Oscillatoriaceae

FDR: 1.442e-01  
Coefficient: -8.64e+01  
Value: omicron

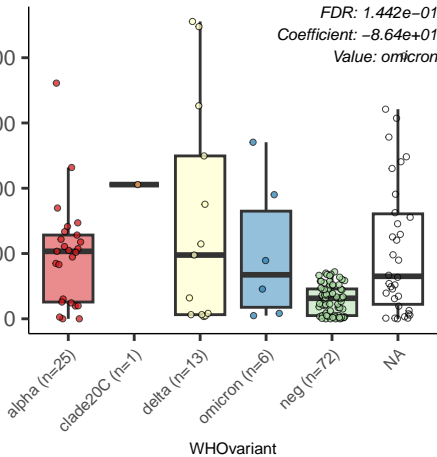

s.c.\_Clostridia.o\_Eubacteriales.f\_Oscillospiraceae.g\_\_Caproicib

FDR: 1.442e-01  
Coefficient: -2.74e+02  
Value: neg

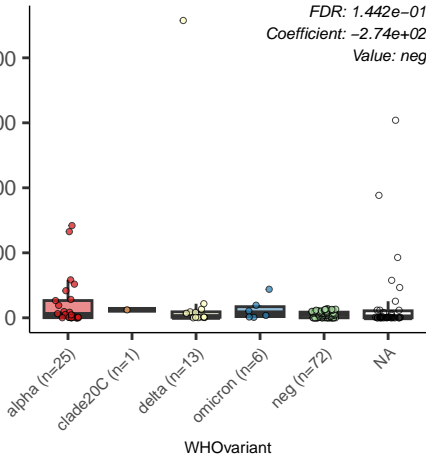

Bacteria.p\_Spirochaetes.c\_Spirochaetia.o\_Spirochaetales.f\_Bo

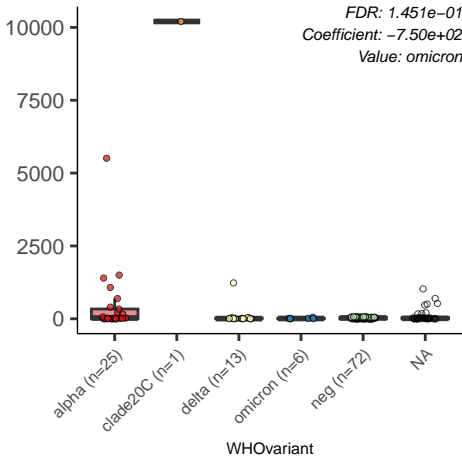

Gammaaproteobacteria.o\_\_Pseudomonadales.f\_\_Pseudomonadaceae

FDR:  $1.457 \times 10^{-1}$   
Coefficient:  $-4.99 \times 10^2$   
Value: omicron

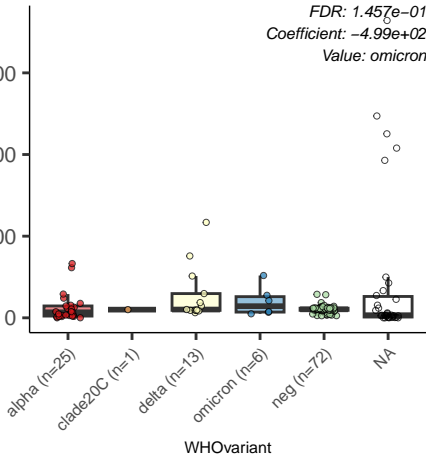

ria.c\_\_Epsilonproteobacteria.o\_\_Campylobacteriales.f\_\_Helicobacte

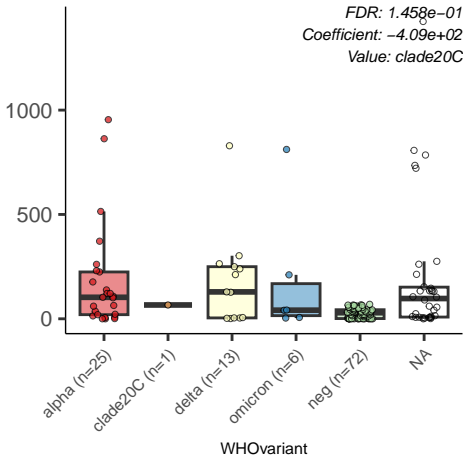



d\_Bacteria.p\_Synergistetes

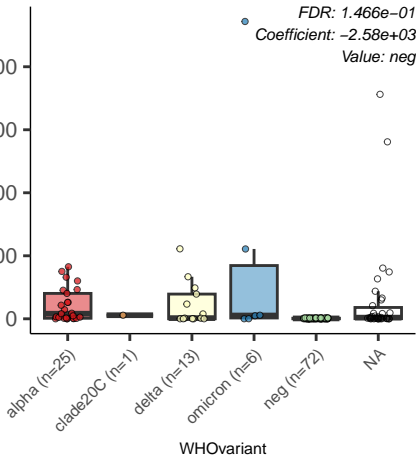

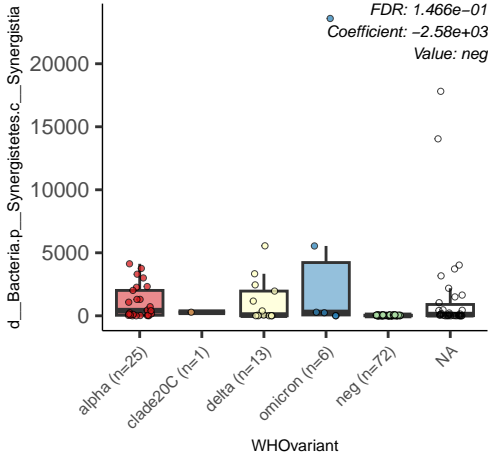

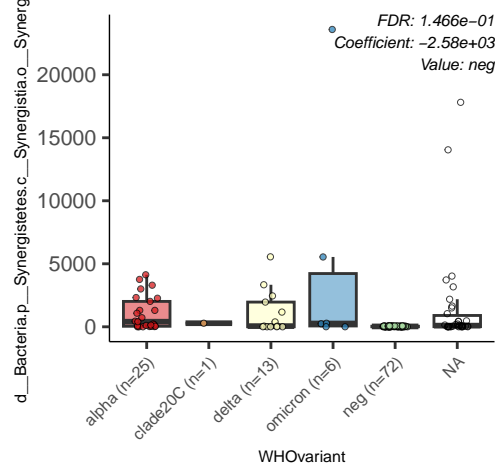

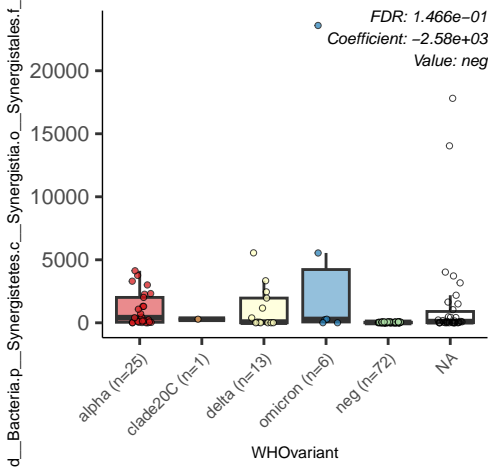

d\_\_Bacteria.p\_\_Firmicutes.c\_\_Tissierellia

FDR: 1.468e-01  
Coefficient: -9.15e+03  
Value: delta

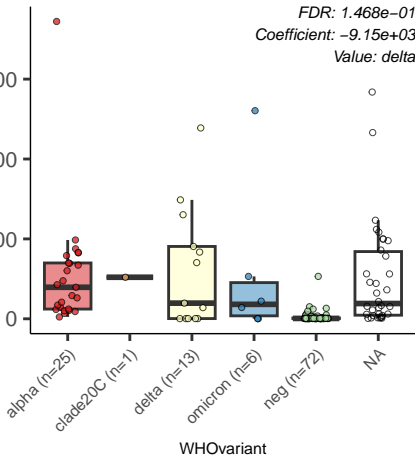

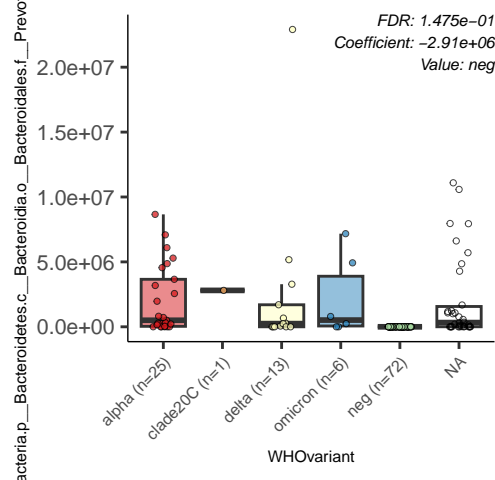

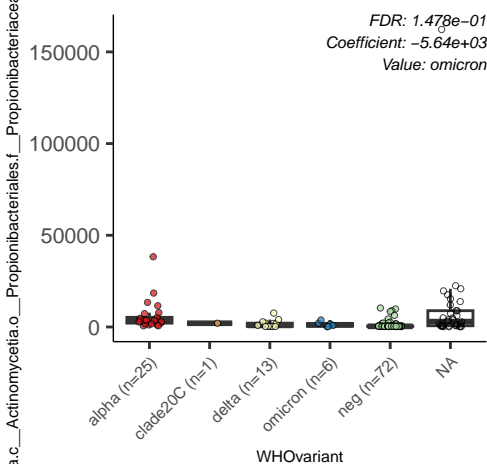

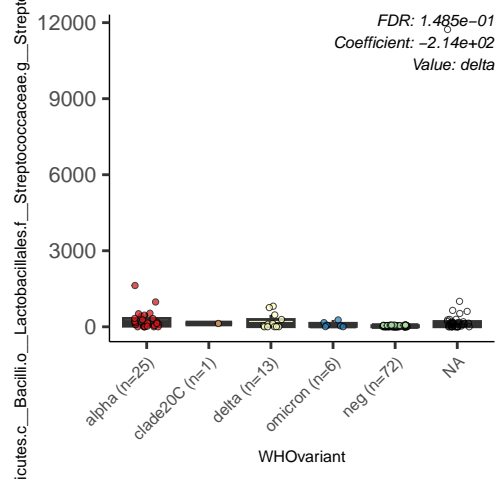



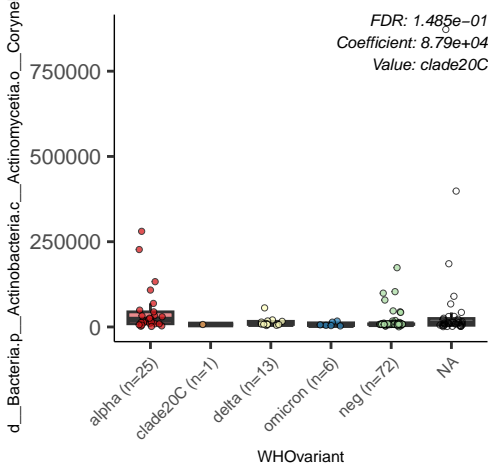

c\_\_Clostridia.o\_\_Eubacteriales.f\_\_Eubacteriales.Family.XIII...Incerta

FDR:  $1.485e-01$   
Coefficient:  $-2.16e+02$   
Value: delta

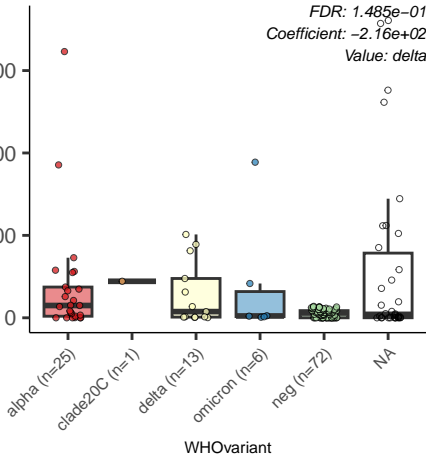

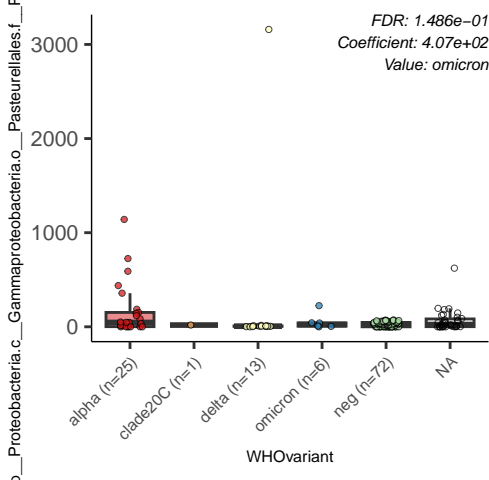

bacteria.c\_\_Gammaproteobacteria.o\_\_Pasteurellales.f\_\_Pasteurella

FDR: 1.486e-01  
Coefficient: 4.07e+02  
Value: omicron

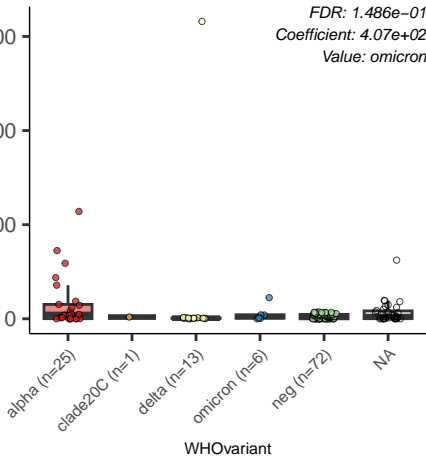

Proteobacteria.c\_\_Gammaproteobacteria.o\_\_Alteromonadales.f

FDR: 1.494e-01  
Coefficient: 3.33e+02  
Value: delta

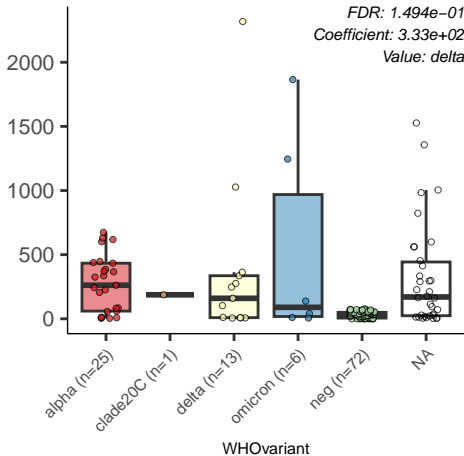

\$spirochaetes.c\_\_Spirochaetia.o\_\_Spirochaetales.f\_\_Borreliaceae.g

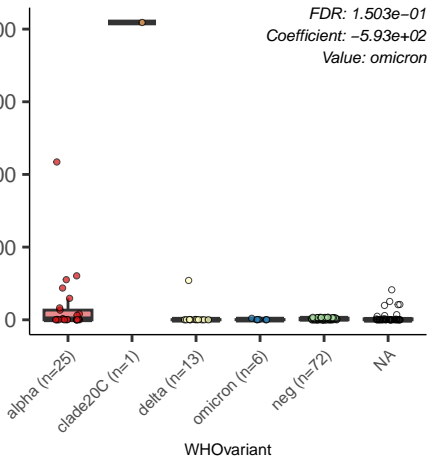

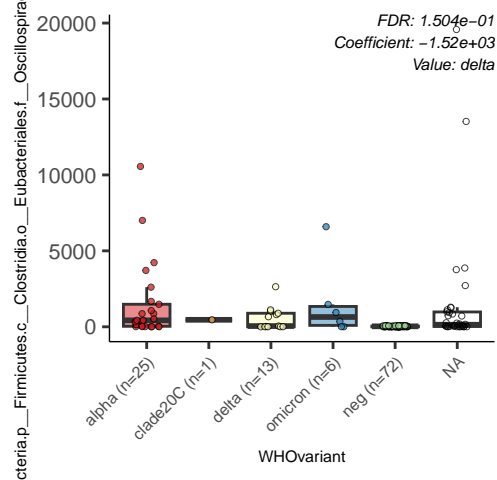

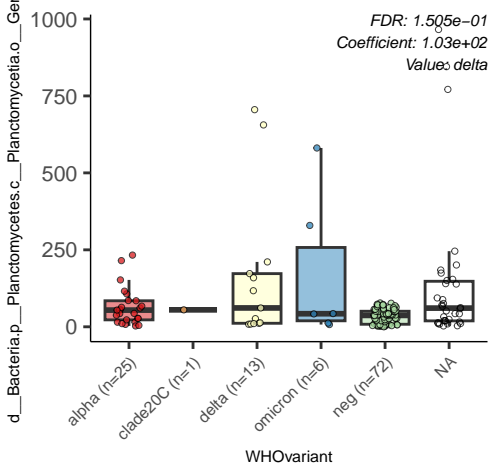



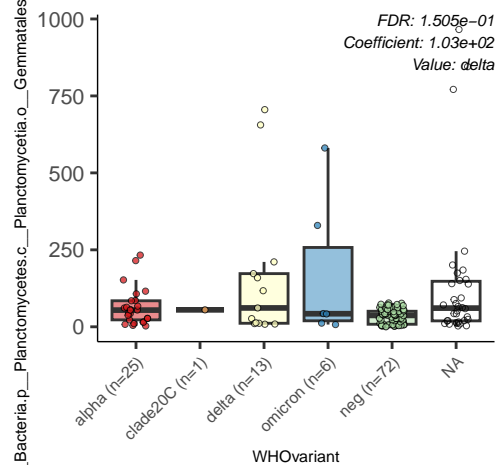

p\_\_Proteobacteria.c\_\_Gammaproteobacteria.o\_\_Alteromonadales.

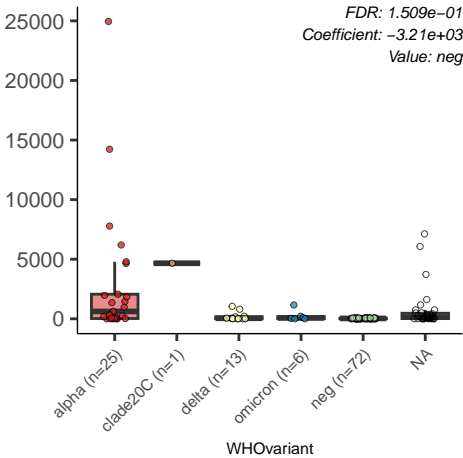

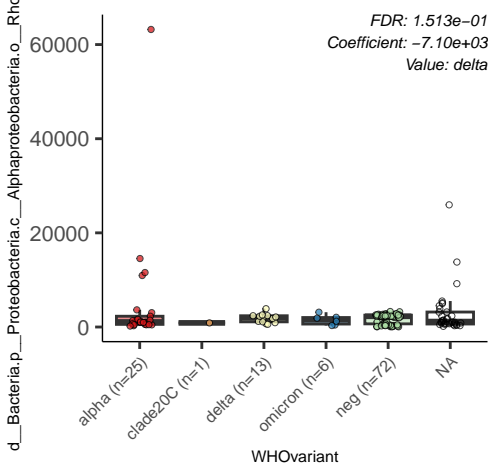

ria.p\_\_Proteobacteria.c\_\_Alphaproteobacteria.o\_\_Sphingomonada

FDR:  $1.514e-01$   
Coefficient:  $1.92e+03$   
Value: clade20C

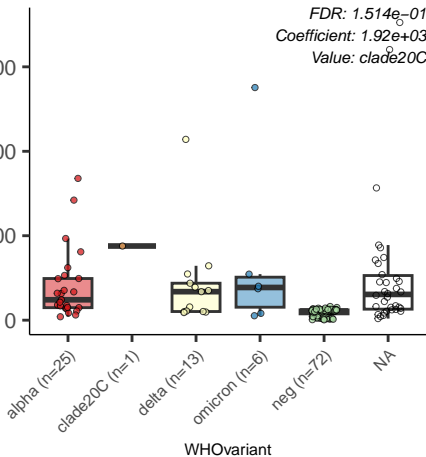

s.c\_\_Bacteroidia.o\_\_Bacteroidales.f\_\_Porphyromonadaceae.g\_\_Po

FDR:  $1.516e-01$   
Coefficient:  $-1.49e+02$   
Value: omicron

1000

500

0

alpha (n=25)

clade20C (n=1)

delta (n=13)

omicron (n=6)

neg (n=72)

NA

WHOvariant

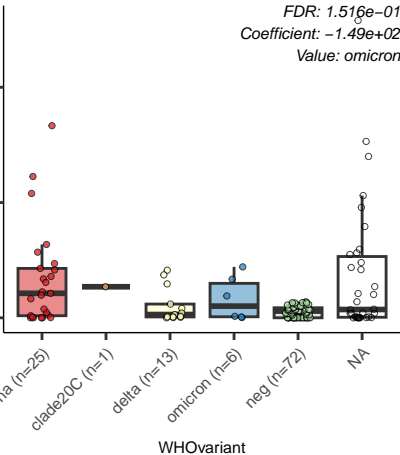

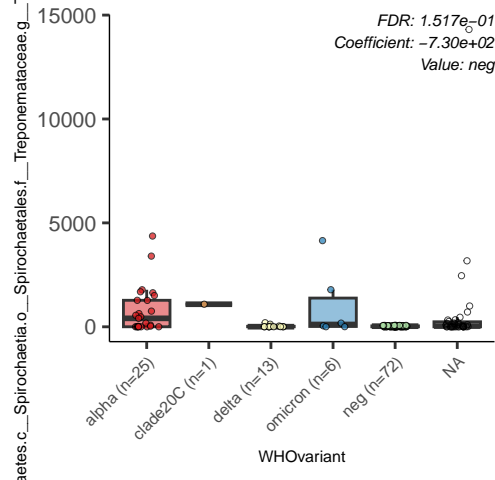

Bacteria.p\_\_Firmicutes.c\_\_Clostridia.o\_\_Eubacteriales.f\_\_Clostridia

FDR:  $1.520 \times 10^{-1}$   
Coefficient:  $1.12 \times 10^3$   
Value: clade20C

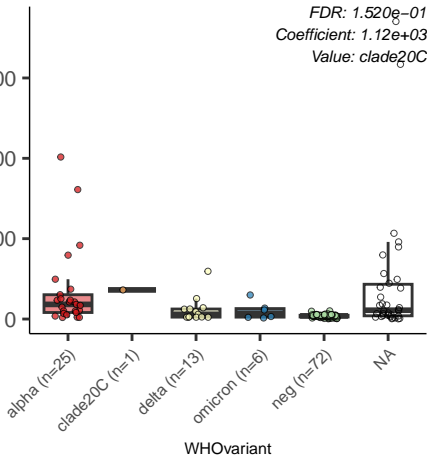

FDR:  $1.520e-01$   
Coefficient:  $1.12e+03$   
Value: clade20C

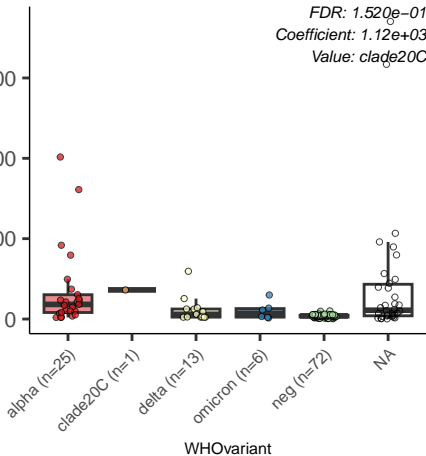



s.c.\_Clostridia.o\_\_Eubacteriales.f\_\_Eubacteriales.Family.XIII..Incert

FDR: 1.520e-01  
Coefficient: -9.37e+02  
Value: delta

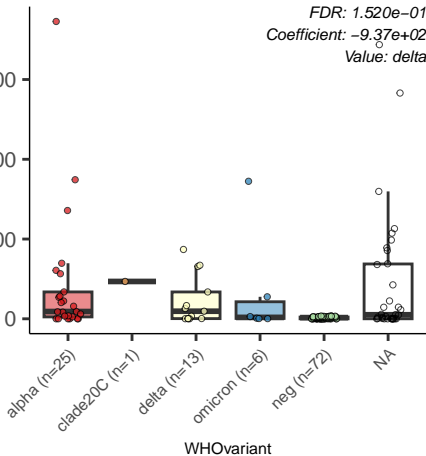

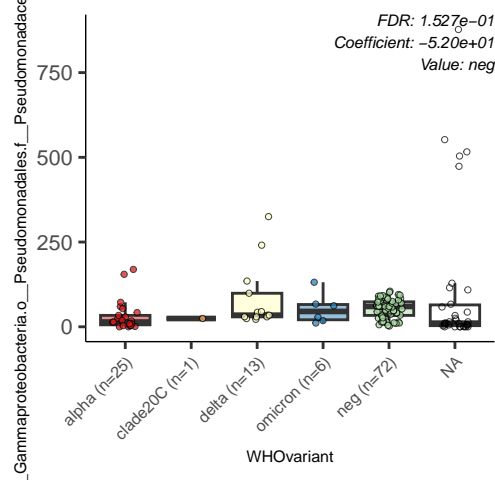

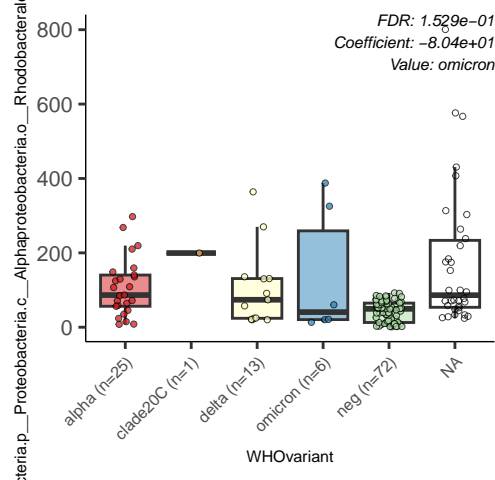

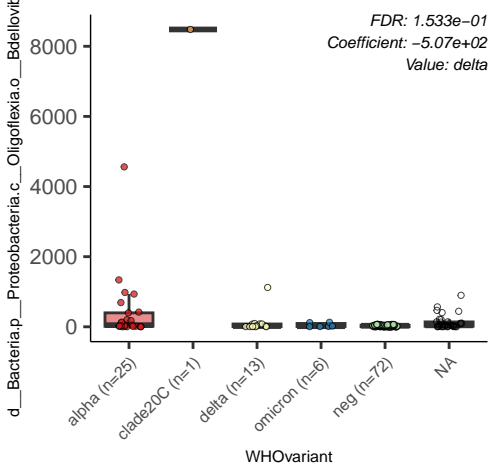

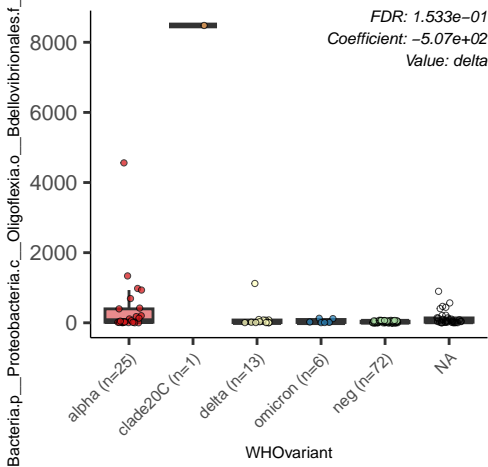

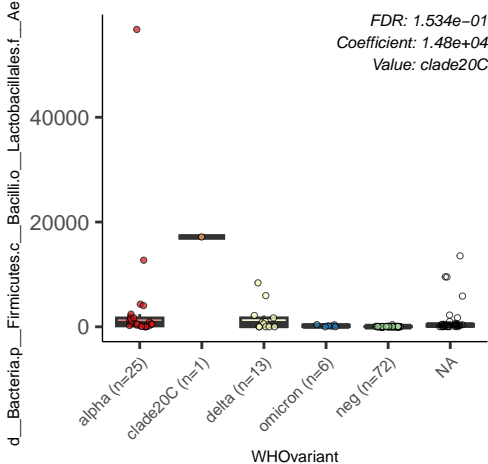

FDR:  $1.539 \times 10^{-1}$   
 Coefficient:  $-5.00 \times 10^2$   
 Value: omicron

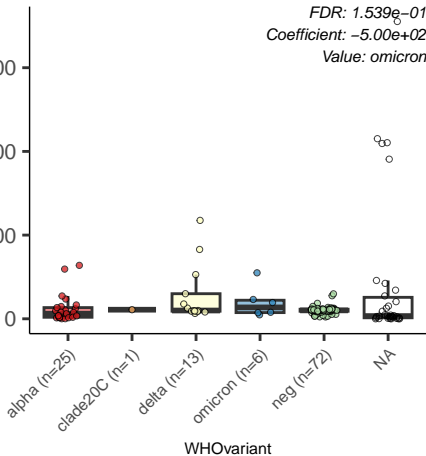

tinobacteria.c\_\_Actinomycetia.o\_\_Micrococcales.f\_\_Micrococcaceae

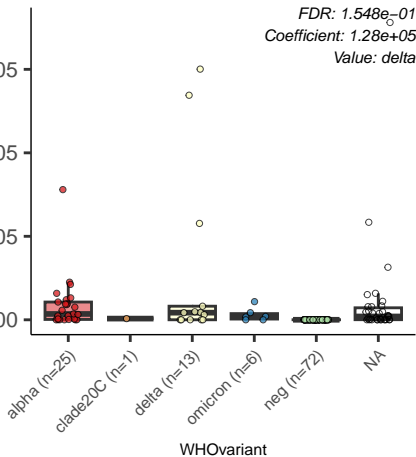



eria.p\_\_Firmicutes.c\_\_Clostridia.o\_\_Thermoanaerobacterales.f\_\_T

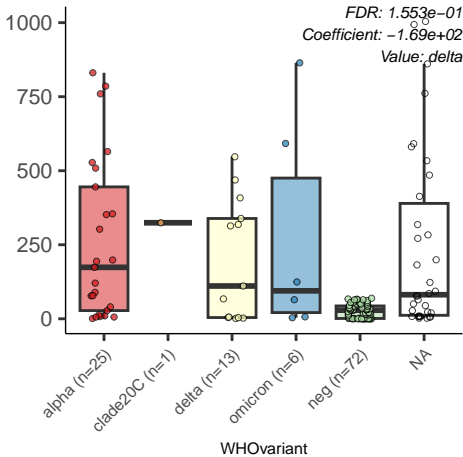

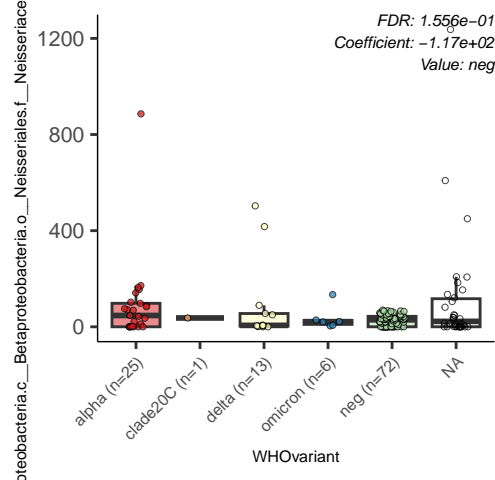

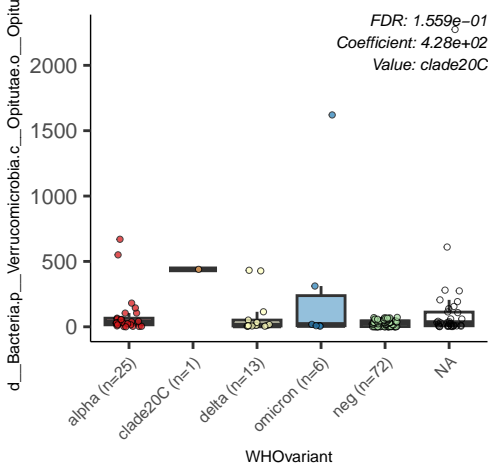

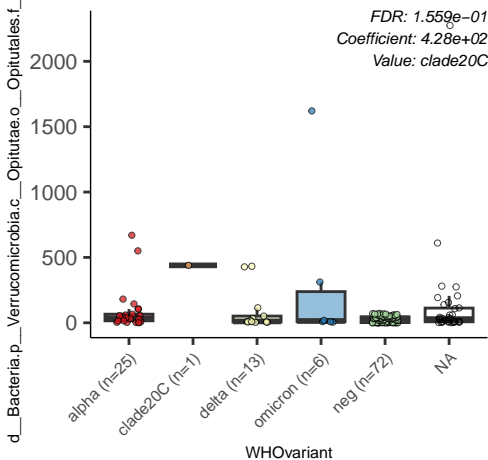

ia.p\_\_Bacteroidetes.c\_\_Flavobacteriia.o\_\_Flavobacteriales.f\_\_Flavo

FDR:  $1.559 \times 10^{-1}$   
Coefficient:  $-1.95 \times 10^2$   
Value: delta

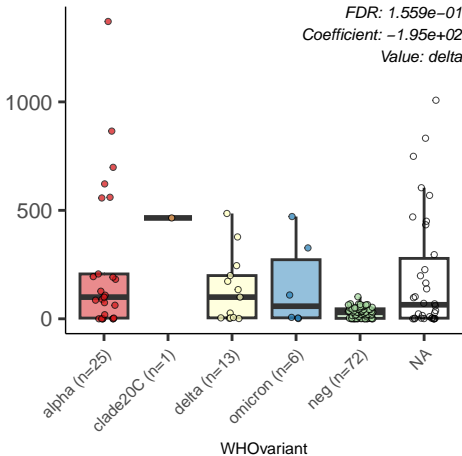

teria.p\_\_Firmicutes.c\_\_Bacilli.o\_\_Bacillales.f\_\_Bacillaceae.g\_\_Baci

*FDR: 1.559e-01*  
*Coefficient: -3.70e+02*  
*Value: clade20C*

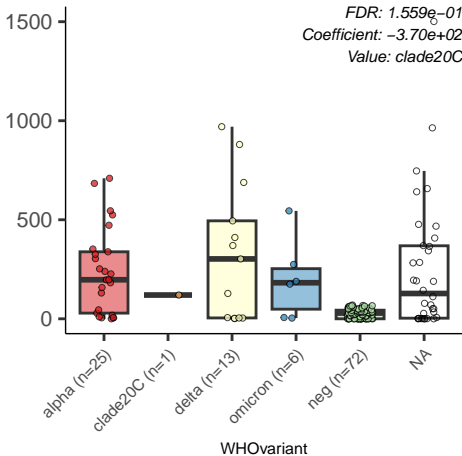

icutes.c\_\_Bacilli.o\_\_Lactobacillales.f\_\_Streptococcaceae.g\_\_Streptococcus

FDR: 1.565e-01  
Coefficient: -7.40e+03  
Value: neg

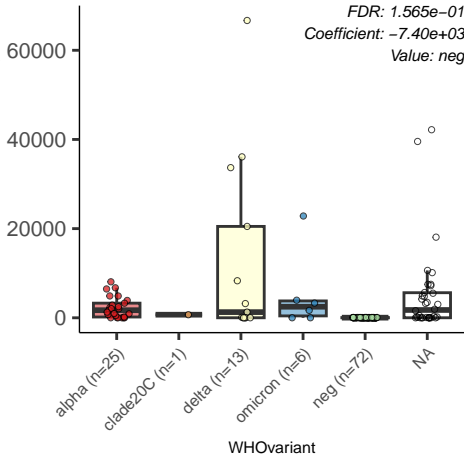

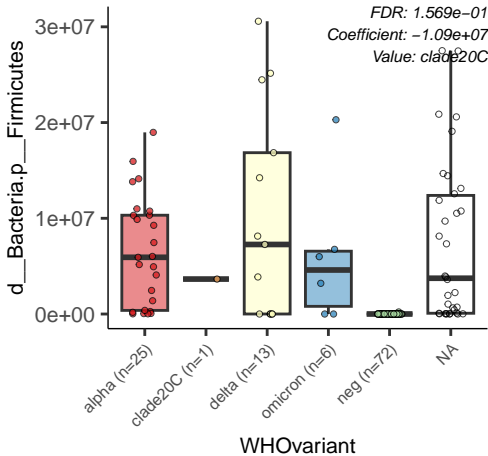



Proteobacteria.c\_\_Alphaproteobacteria.o\_\_Hyphomicrobiales.f\_\_Xa

FDR:  $1.570e-01$   
Coefficient:  $-2.73e+02$   
Value: omicron

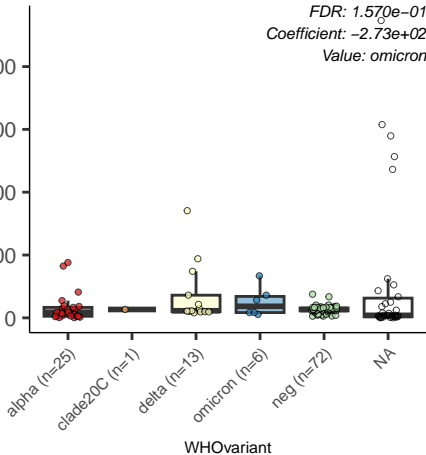

FDR: 1.575e-01  
Coefficient: -1.83e+02  
Value: neg

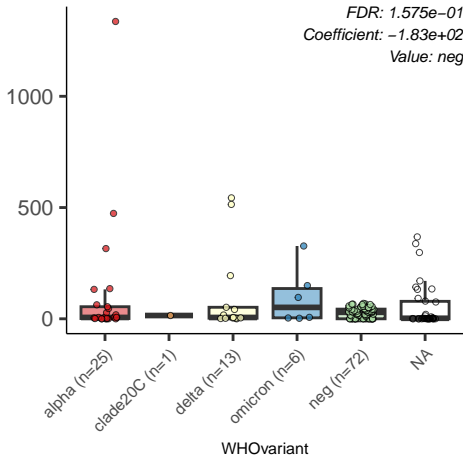

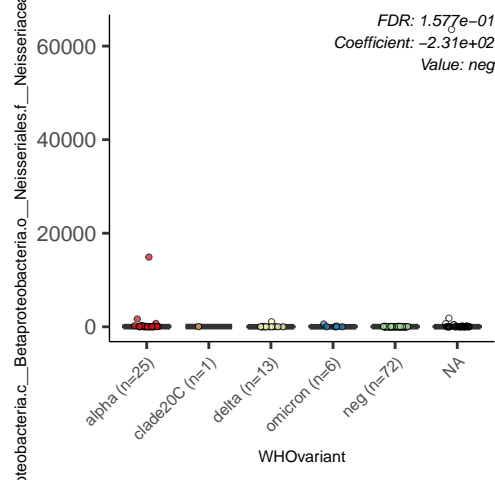

Actinomycetia.o\_\_Propionibacteriales.f\_\_Propionibacteriaceae.g\_\_F

FDR: 1.588e-01  
Coefficient: -2.36e+02  
Value: neg

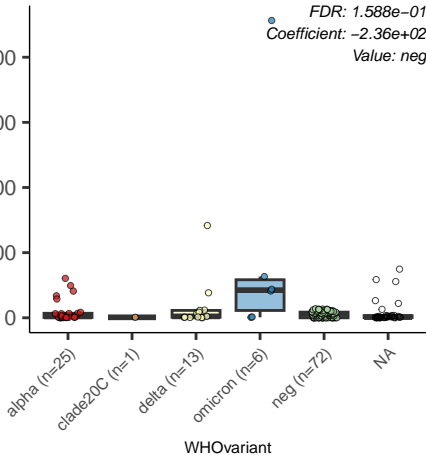

utes.c\_\_Clostridia.o\_\_Eubacteriales.f\_\_Lachnospiraceae.g\_\_Anaeroc

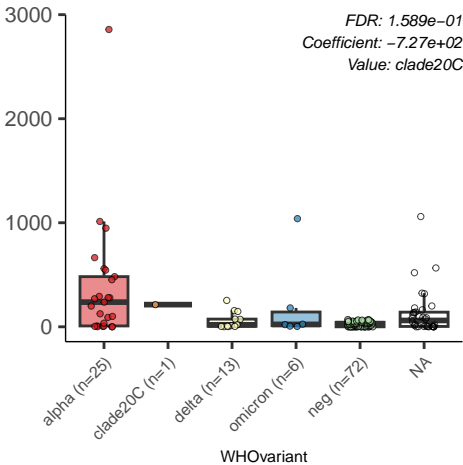

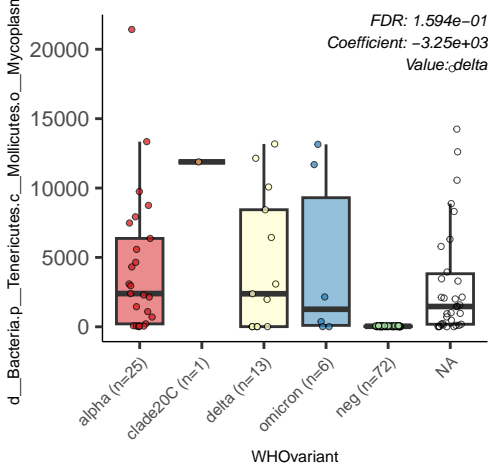

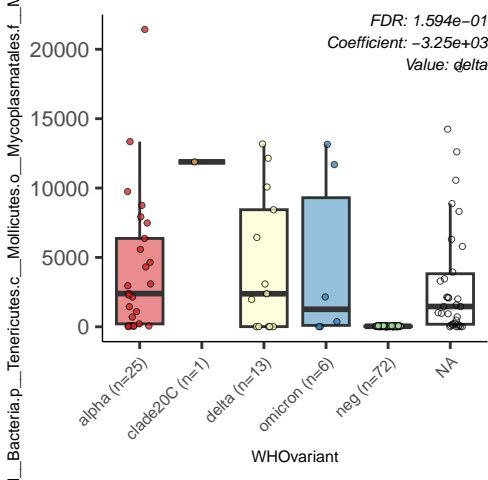





Gammaproteobacteria.o\_Pasteurellales.f\_Pasteurellaceae.g\_A

FDR: 1.600e-01  
Coefficient: 5.37e+03  
Value: omicron

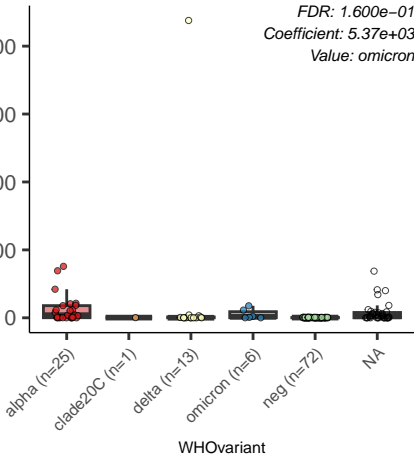

Bacteria.p\_\_Firmicutes.c\_\_Bacilli.o\_\_Bacillales.f\_\_Staphylococcaceae

FDR: 1.603e-01  
Coefficient: -3.48e+04  
Value: neg

2e+05

1e+05

0e+00

alpha (n=25)

clade20C (n=1)

delta (n=13)

omicron (n=6)

neg (n=72)

NA

WHOvariant

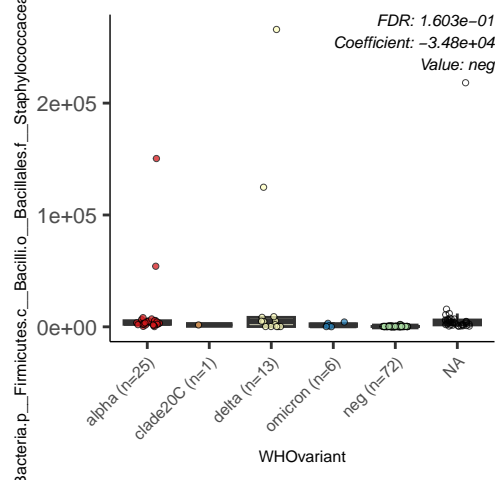

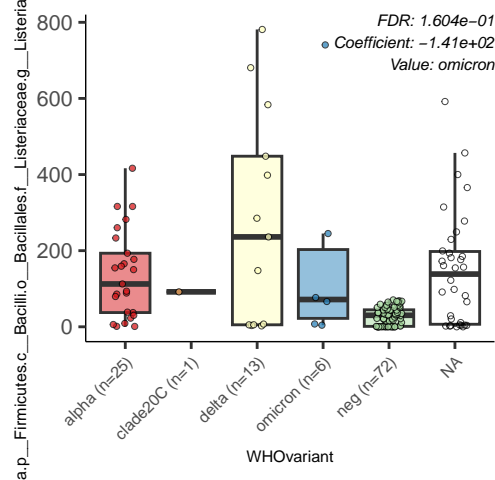

Bacteroidetes.c\_\_Bacteroidia.o\_\_Bacteroidales.f\_\_Rikenellaceae.g

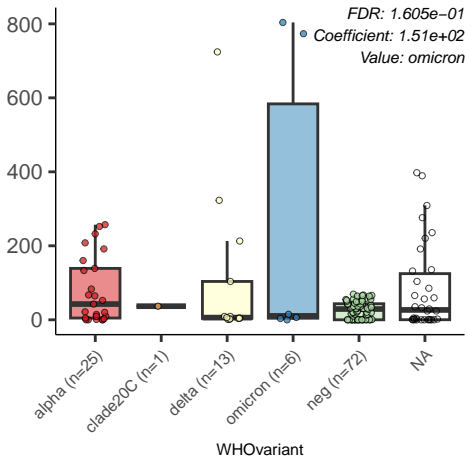

Actinobacteria.p\_Actinobacteria.c\_Actinomycetia.o\_Micrococcales.f\_Micrococcales.g\_Micrococcales.h\_Micrococcales.i\_Micrococcales.j\_Micrococcales.k\_Micrococcales.l\_Micrococcales.m\_Micrococcales.n\_Micrococcales.o\_Micrococcales.p\_Micrococcales.q\_Micrococcales.r\_Micrococcales.s\_Micrococcales.t\_Micrococcales.u\_Micrococcales.v\_Micrococcales.w\_Micrococcales.x\_Micrococcales.y\_Micrococcales.z\_Micrococcales

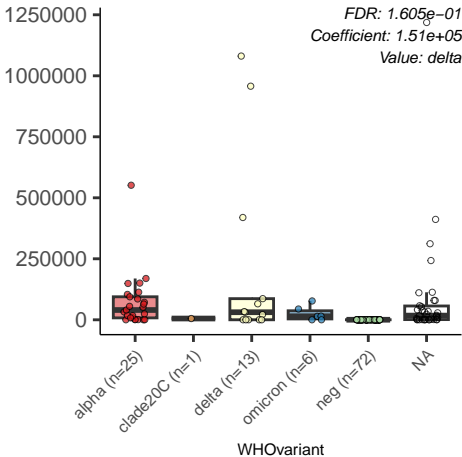

Firmicutes.c\_\_Clostridia.o\_\_Eubacteriales.f\_\_Eubacteriales.Family.X

*FDR: 1.605e-01*  
*Coefficient: -6.87e+03*  
*Value: omicron*

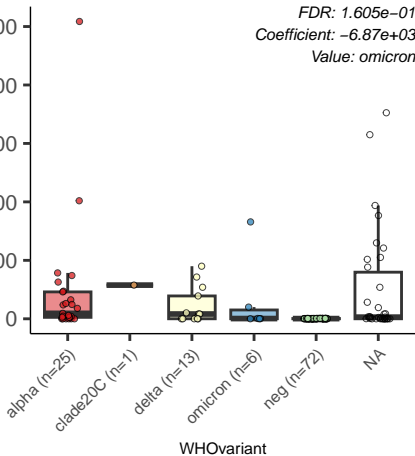

Clostridia.o\_\_Eubacteriales.f\_\_Eubacteriales.Family.XIII..Incertae.S

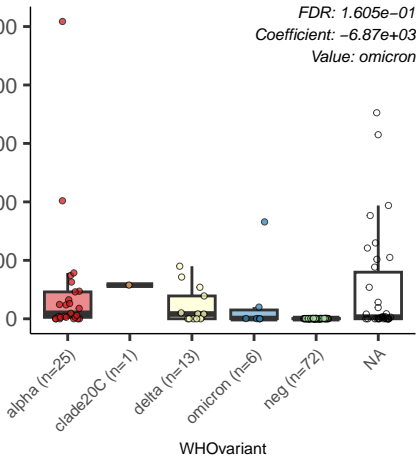

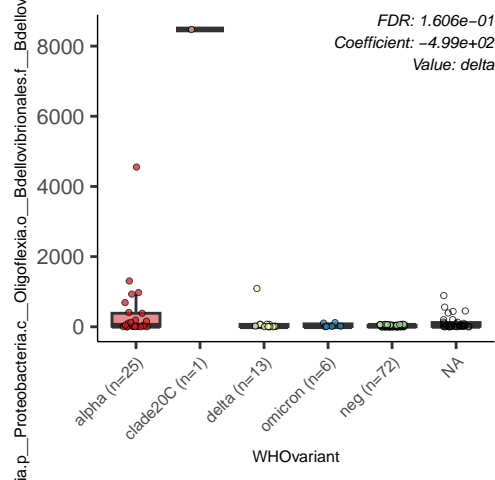



Actinomycetia.o\_\_Corynebacteriales.f\_\_Corynebacteriaceae.g

FDR: 1.607e-01  
Coefficient: -8.72e+02  
Value: delta

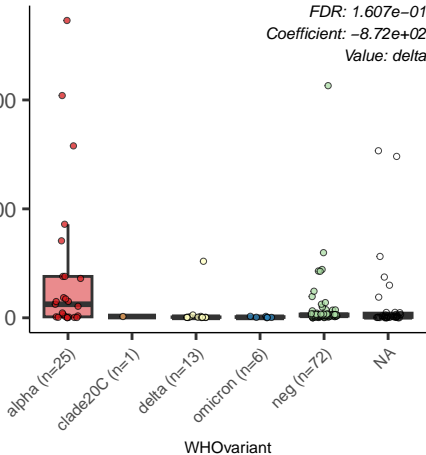

p\_\_Proteobacteria.c\_\_Betaproteobacteria.o\_\_Burkholderiales.f\_\_B

FDR: 1.609e-01  
Coefficient: -2.67e+04  
Value: delta

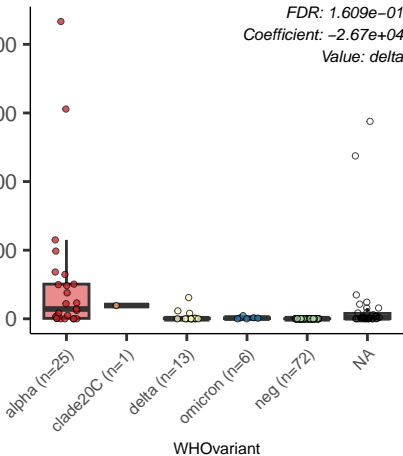

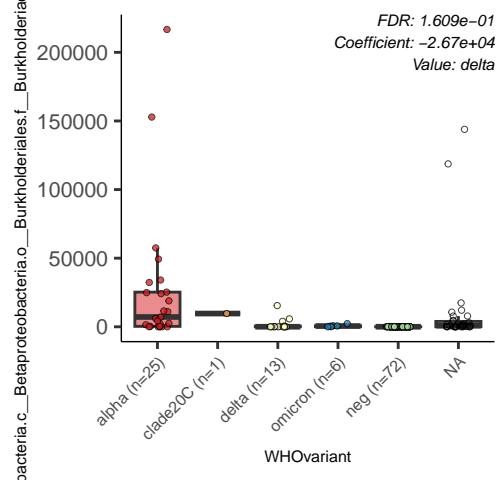

detes.c\_\_Bacteroidia.o\_\_Bacteroidales.f\_\_Tannerellaceae.g\_\_Parat

FDR:  $1.609e-01$   
Coefficient:  $4.18e+03$   
Value: clade20C

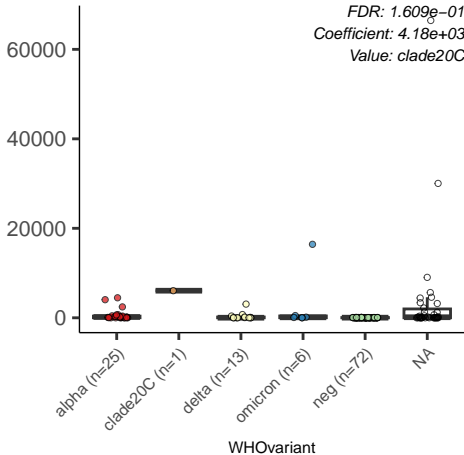

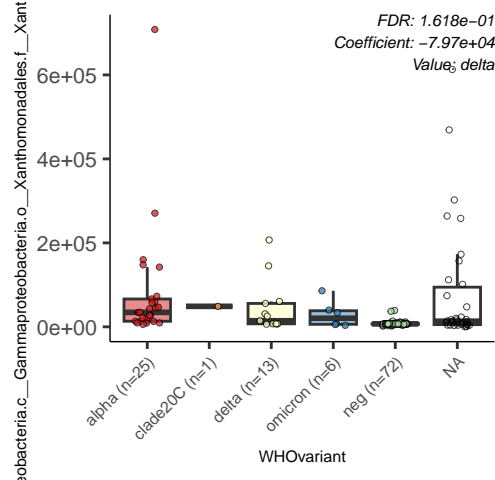

*FDR: 1.618e-01*  
*Coefficient: -7.97e+04*  
*Value: delta*

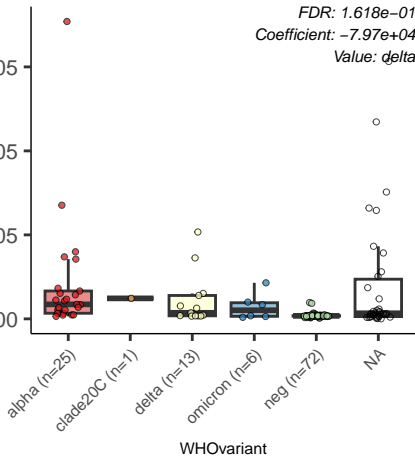

FDR:  $1.621 \times 10^{-1}$   
Coefficient:  $-1.22 \times 10^2$   
Value: omicron

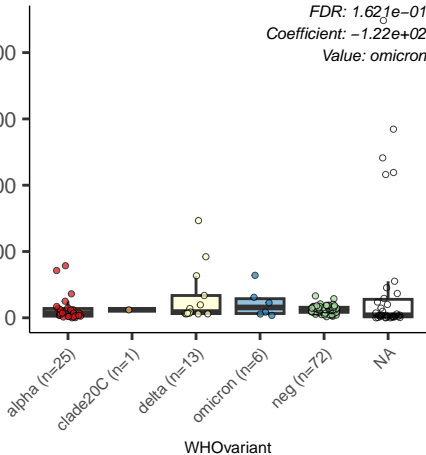

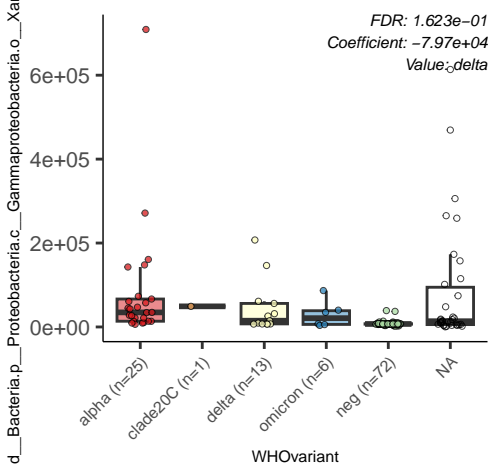



ria.p\_\_Proteobacteria.c\_\_Gammaproteobacteria.o\_\_Xanthomonada

*FDR: 1.625e-01*  
*Coefficient: -7.97e+04*  
*Value<sub>o</sub>delta*

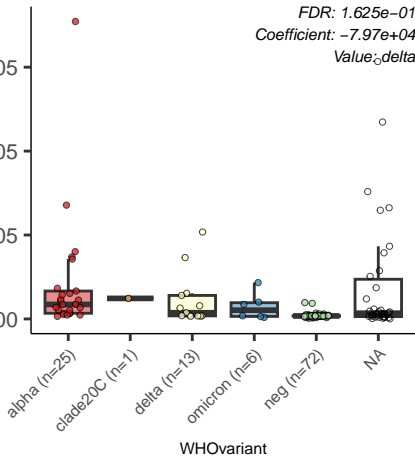

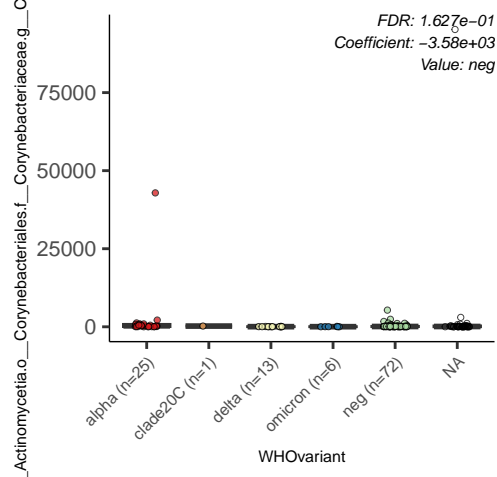

bacteria.c\_\_Actinomycetia.o\_\_Propionibacteriales.f\_\_Propionibacter

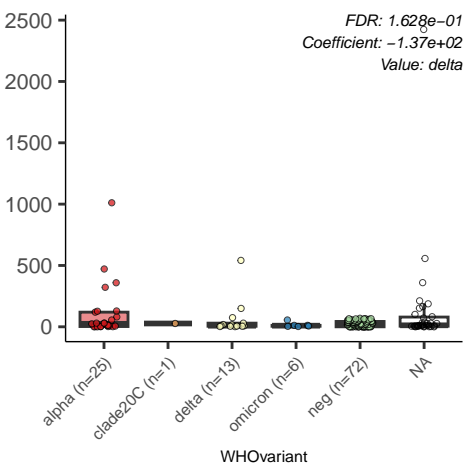

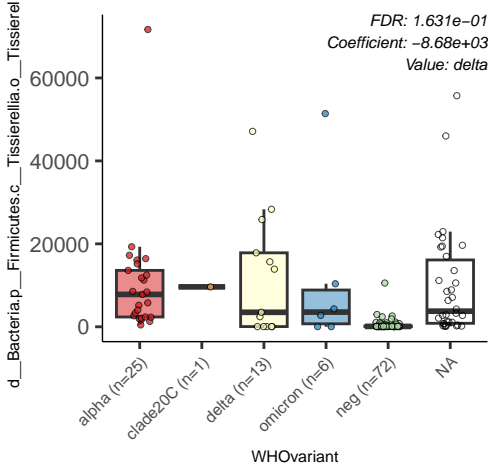

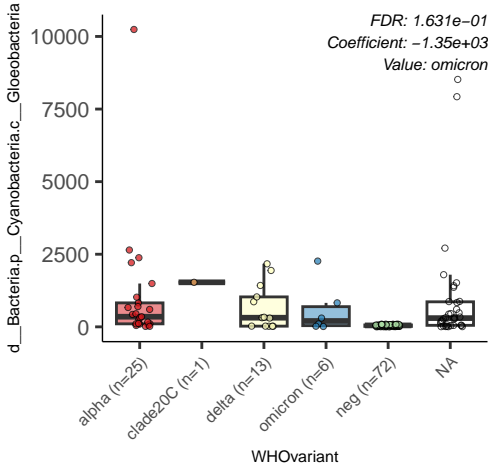

d\_\_Bacteria.p\_\_Cyanobacteria.c\_\_Gloeobacteria.o\_\_Gloeobacter

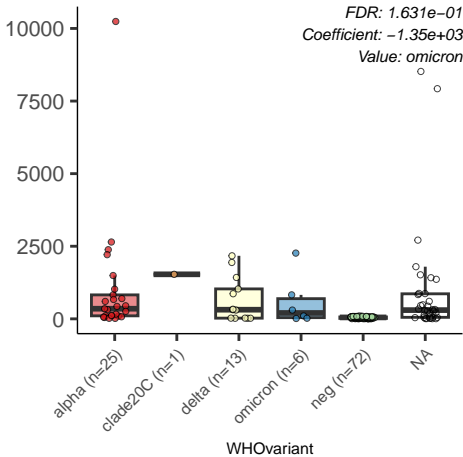

Bacteria.p\_\_Cyanobacteria.c\_\_Gloeobacteria.o\_\_Gloeobacterales.f.

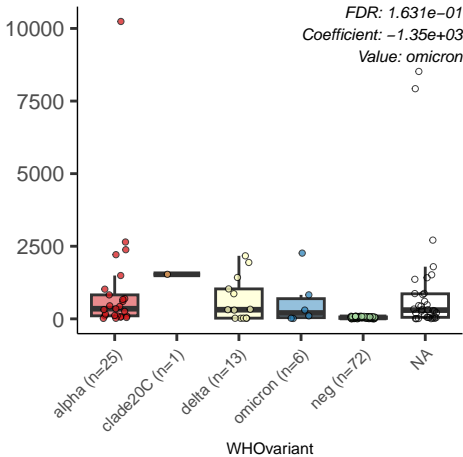

p\_Firmicutes.c\_\_Erysipelotrichia.o\_\_Erysipelotrichales.f\_\_Erysipe

FDR: 1.632e-01  
Coefficient: -2.23e+03  
Value: omicron

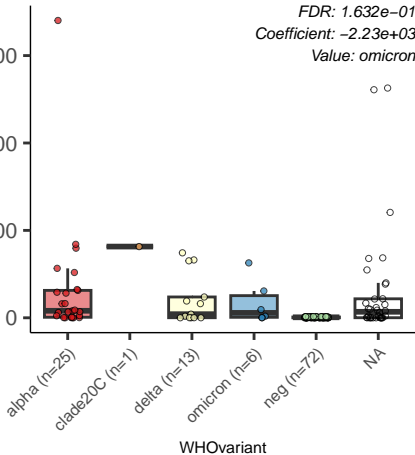



rmicutes.c\_\_Clostridia.o\_\_Eubacteriales.f\_\_Eubacteriales.Family.XI

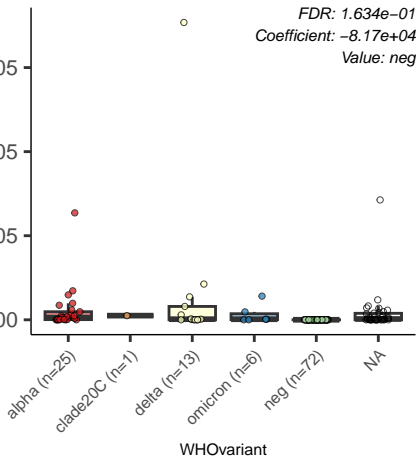

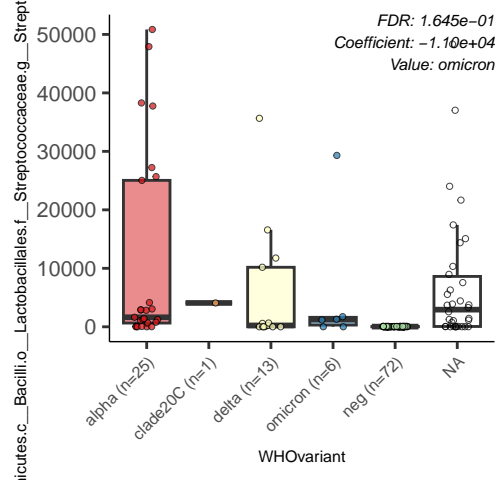

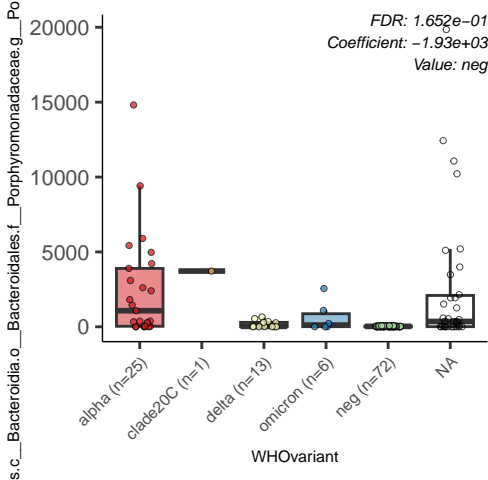

Proteobacteria.c\_\_Gammaproteobacteria.o\_\_Enterobacterales.f\_\_E

FDR:  $1.657e-01$   
Coefficient:  $-2.13e+02$   
Value: neg

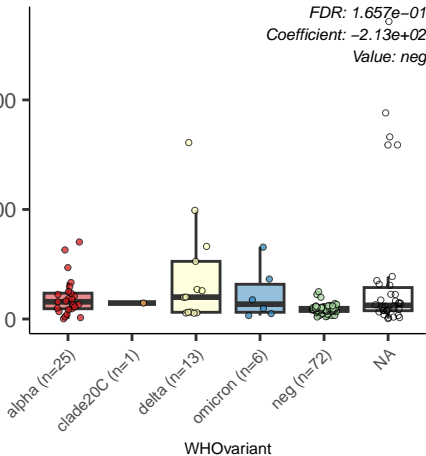

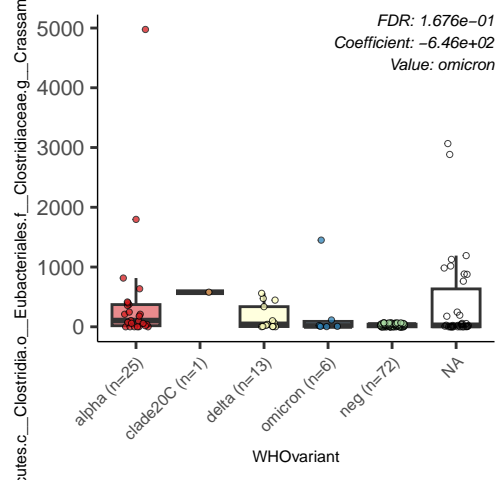



gisteretes.c\_\_Synergistia.o\_\_Synergistales.f\_\_Synergistaceae.g\_\_Cl

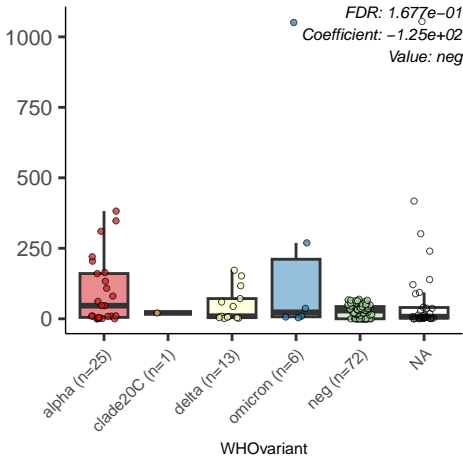

obacteria.c\_\_Betaproteobacteria.o\_\_Neisseriales.f\_\_Neisseriaceae.

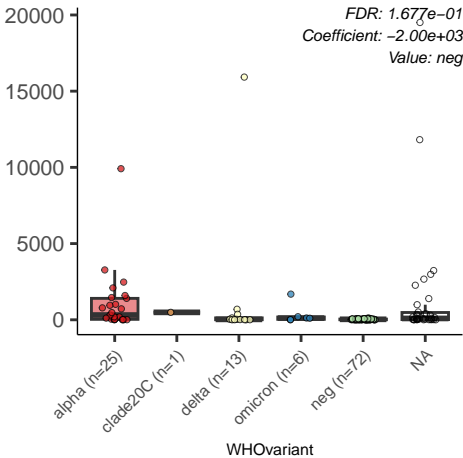



eria.p\_Firmicutes.c\_Bacilli.o\_Bacillales.f\_Bacillaceae.g\_Priest

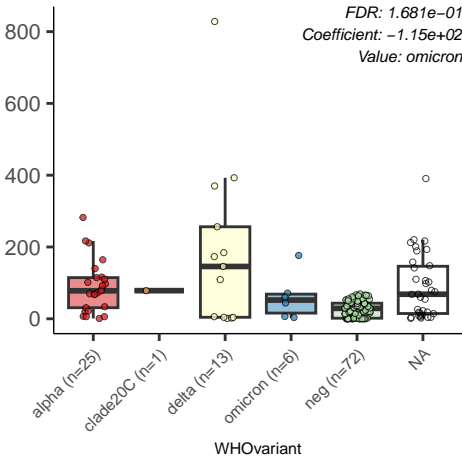

d\_Bacteria.p\_Firmicutes.c\_Bacilli.o\_Bacillales.f\_Bacillaceae

FDR:  $1.684e-01$   
Coefficient:  $-2.39e+02$   
Value: omicron

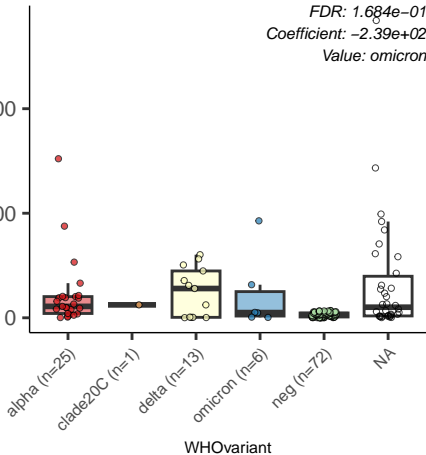

*FDR: 1.685e-01*

Coefficient:  $-5.03e+02$

Value: *clade20C*

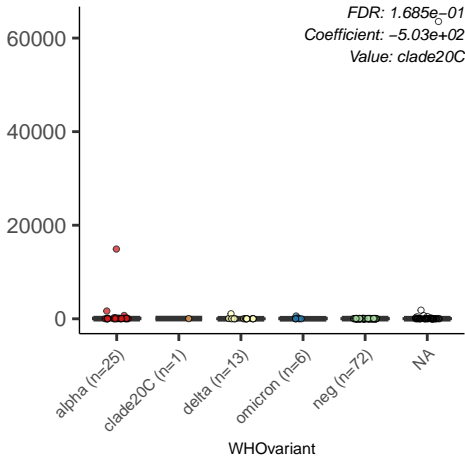

\_Bacteria.p\_\_Firmicutes.c\_\_Bacilli.o\_\_Lactobacillales.f\_\_Aerococcca

*FDR: 1.693e-01*  
*Coefficient: 1.43e+04*  
*Value: clade20C*

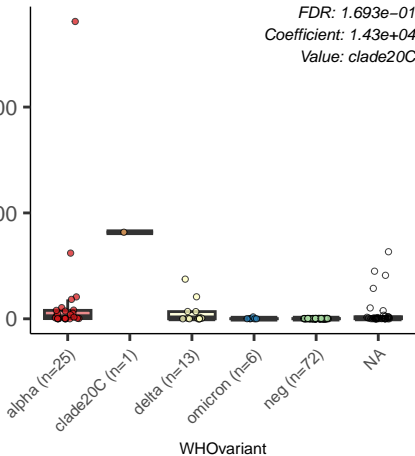

Firmicutes.c\_\_Bacilli.o\_\_Lactobacillales.f\_\_Aerococcaceae.g\_\_Abi

FDR: 1.693e-01  
Coefficient: 1.43e+04  
Value: clade20C

40000

20000

0

alpha (n=25)

clade20C (n=1)

delta (n=13)

omicron (n=6)

neg (n=72)

NA

WHOvariant

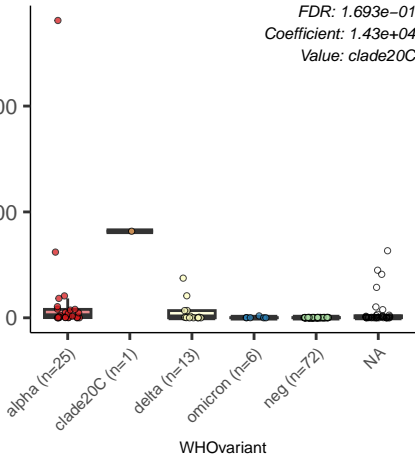

Negativicutes.o\_\_Selenomonadales.f\_\_Selenomonadaceae.g\_\_Se

FDR:  $1.701e-01$   
Coefficient:  $-1.57e+03$   
Value: omicron

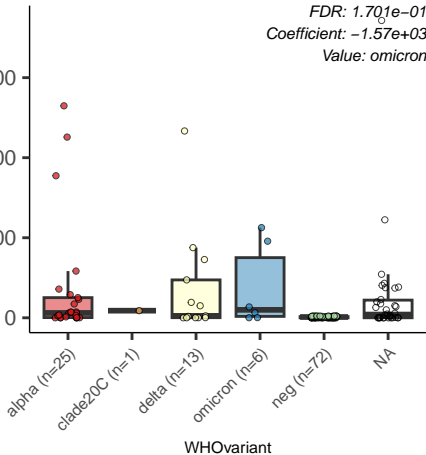

Εpsilonproteobacteria.o\_\_Campylobacteriales.f\_\_Campylobacteraceae

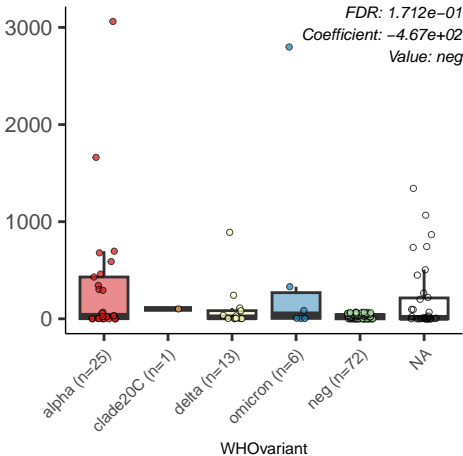

bacteria.p\_\_Firmicutes.c\_\_Negativicutes.o\_\_Veillonellales.f\_\_Veillon

FDR:  $1.712 \times 10^{-1}$   
Coefficient:  $-4.56 \times 10^6$   
Value: clade20C

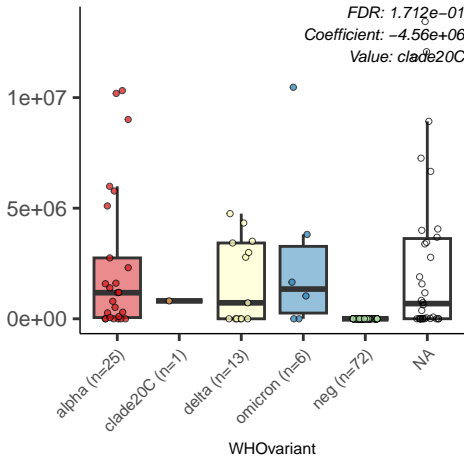



Firmicutes.c\_\_Negativicutes.o\_\_Acidaminococcales.f\_\_Acidaminob

FDR:  $1.717e-01$   
Coefficient:  $-7.31e+02$   
Value: clade20C

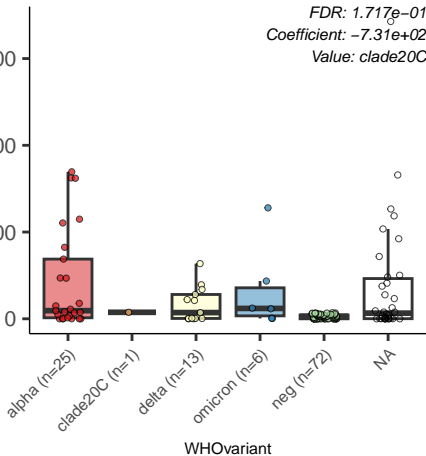

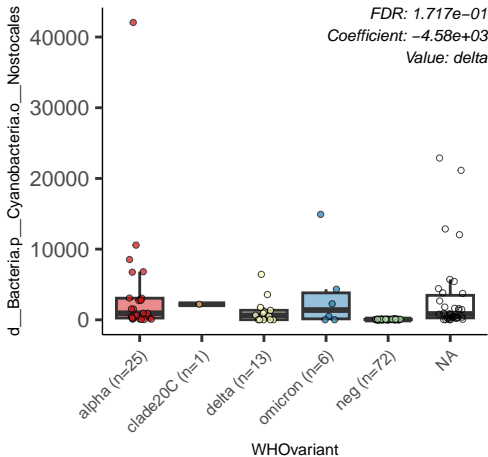

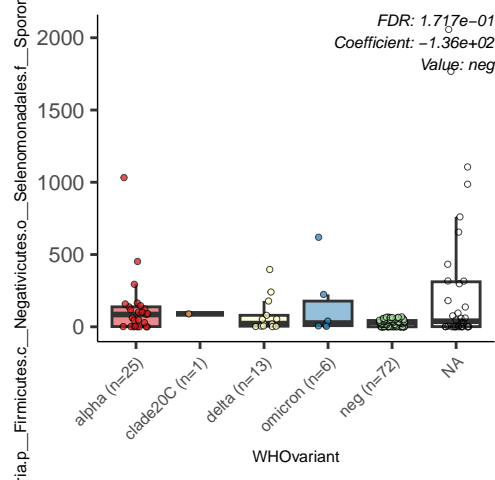

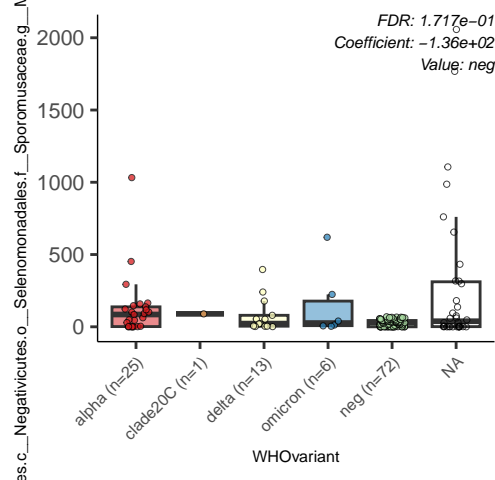

c\_\_Synergistia.o\_\_Synergistales.f\_\_Synergistaceae.g\_\_Thermana

FDR:  $1.725e-01$   
Coefficient:  $7.98e+01$   
Value: omicron

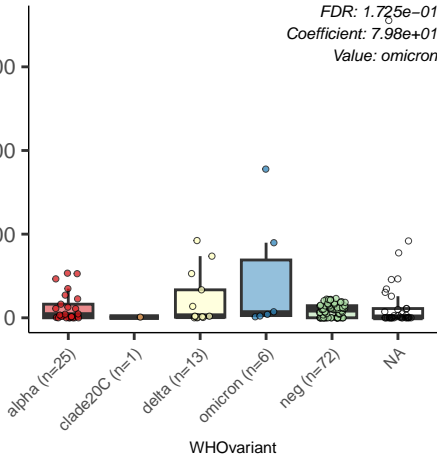

charimonadia.o\_\_Candidatus.Nanosynbacterales.f\_\_Candidatus.Na

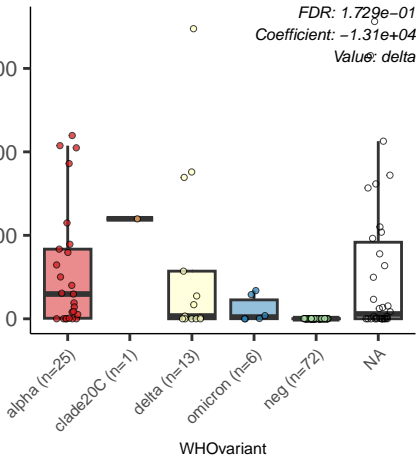

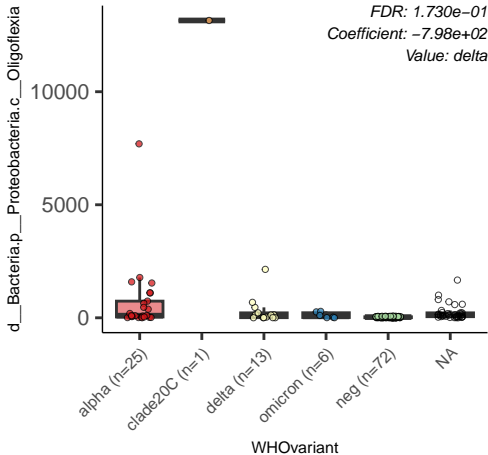

FDR: 1.730e-01  
Coefficient: -1.99e+05  
Value: delta

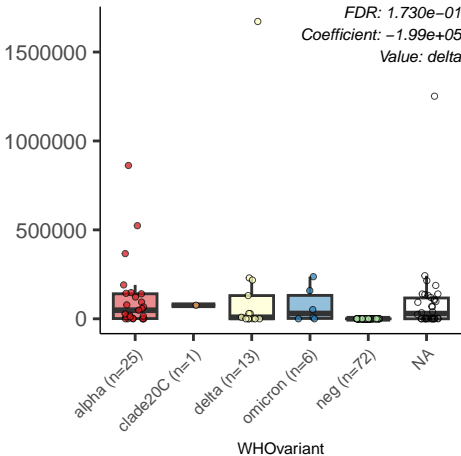



icutes.c\_\_Bacilli.o\_\_Lactobacillales.f\_\_Streptococcaceae.g\_\_Streptococcus

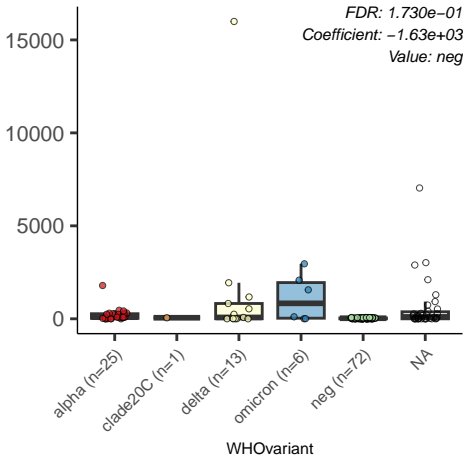

\_Bacteria.p\_\_Firmicutes.c\_\_Bacilli.o\_\_Bacillales.f\_\_Alicyclobacillace

FDR:  $1.732e-01$   
Coefficient:  $-1.76e+02$   
Value: neg

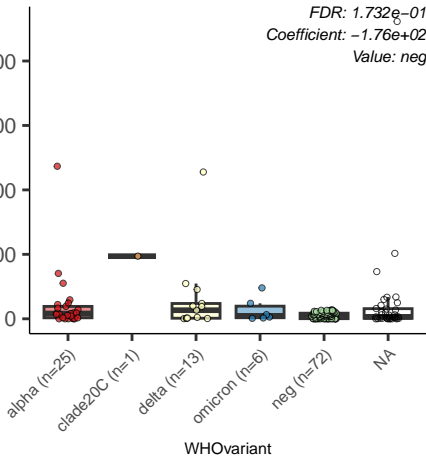

Actinomycetia.o\_\_Corynebacteriales.f\_\_Corynebacteriaceae.g

FDR:  $1.736e-01$   
Coefficient:  $-1.02e+03$   
Value: omicron

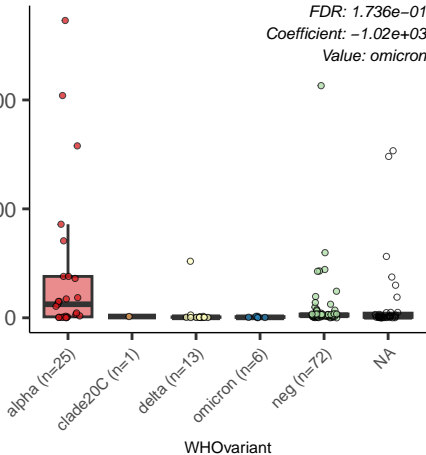

tes.c\_Mollicutes.o\_Mycoplasmatales.f\_Mycoplasmataceae.g\_

FDR: 1.744e-01  
Coefficient: -3.56e+02  
Value: neg

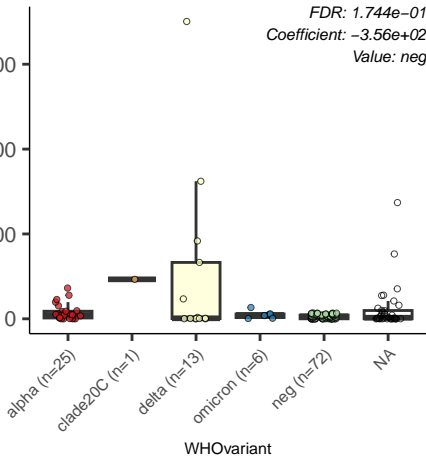

Bacteria.p\_Actinobacteria.c\_Actinomycetia.o\_Micrococcales.f

FDR:  $1.744 \times 10^{-1}$   
Coefficient:  $1.64 \times 10^5$   
Value: delta

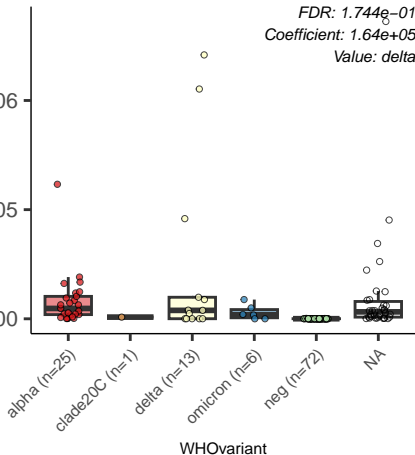

bacteria.c\_Actinomycetia.o\_Micrococcales.f\_Microbacteriaceae.g

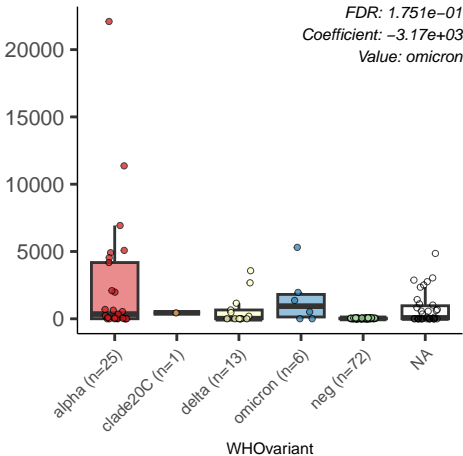

ia.p\_Actinobacteria.c\_Actinomycetia.o\_Micrococcales.f\_Microb

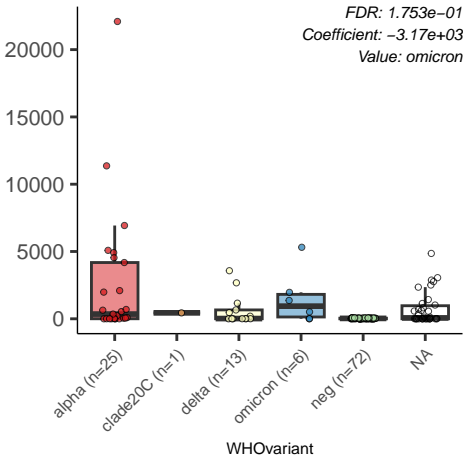

d\_Bacteria.p\_\_Cyanobacteria.o\_\_Chroococcales

FDR: 1.761e-01  
Coefficient: 2.10e+02  
Value: clade20C

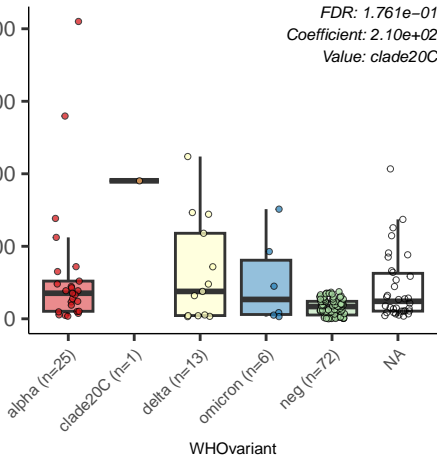



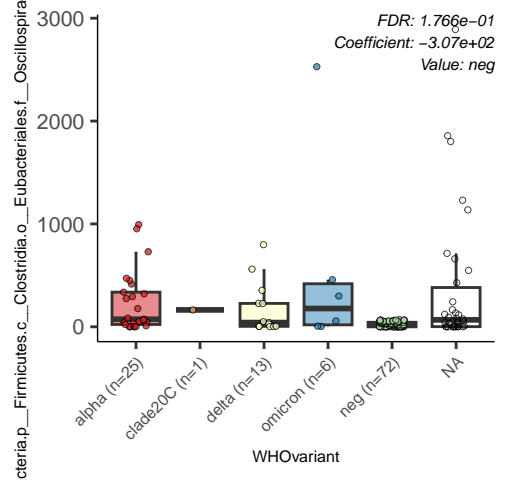

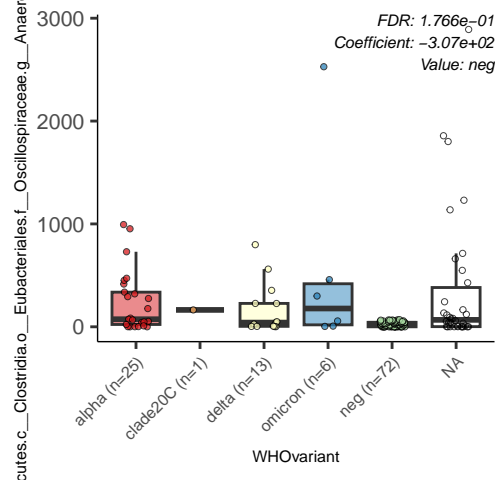

FDR: 1.777e-01  
Coefficient: -2.85e+02  
Value: neg

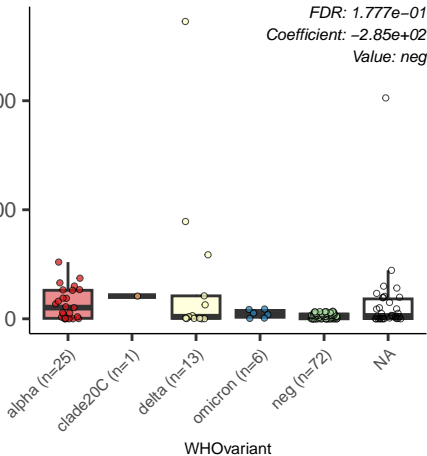

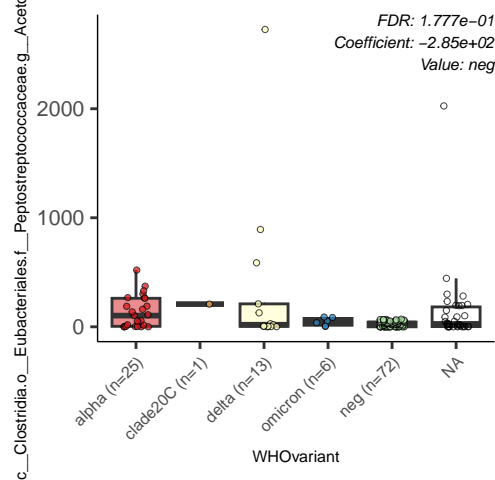

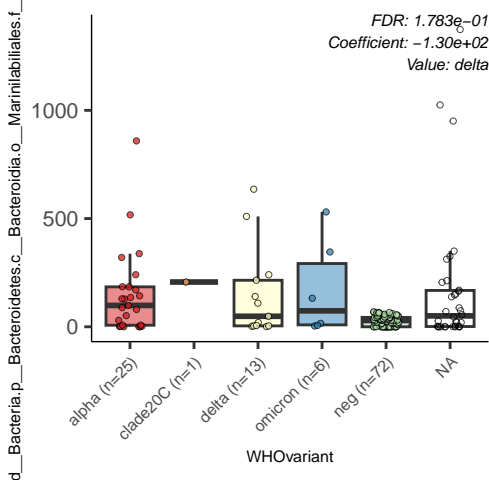

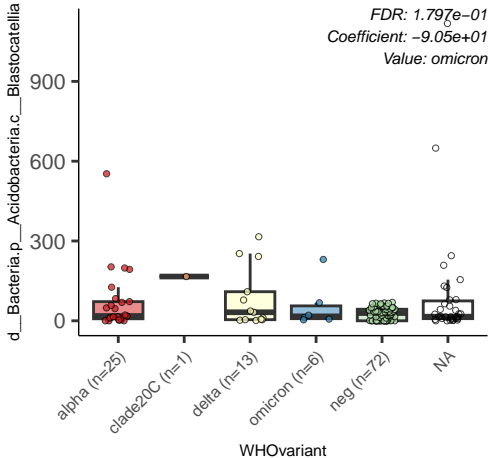

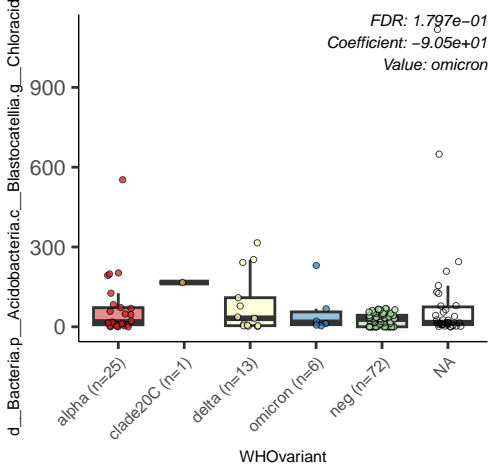

ria.c\_\_Gammaproteobacteria.o\_\_Pasteurellales.f\_\_Pasteurellaceae

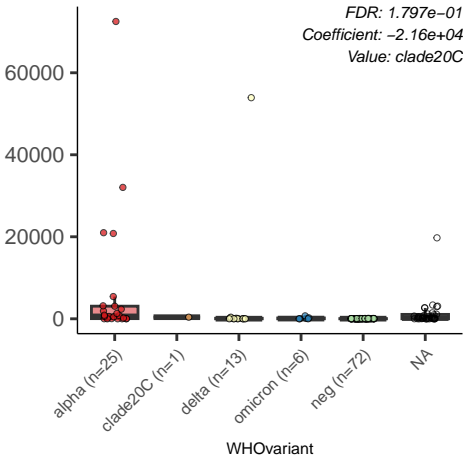



o\_\_Cyanobacteria.o\_\_Oscillatoriales.f\_\_Oscillatoriaceae.g\_\_Oscilla

FDR: 1.805e-01  
Coefficient: -7.93e+01  
Value: omicron

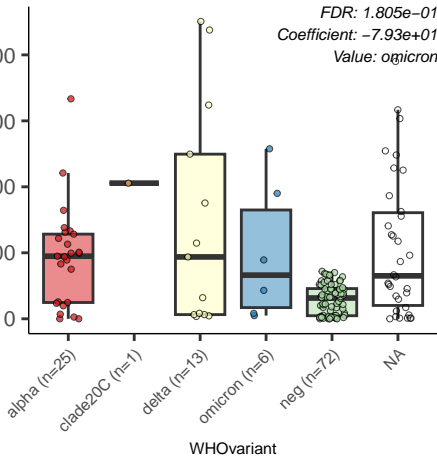

micutes.c\_\_Bacilli.o\_\_Lactobacillales.f\_\_Streptococcaceae.g\_\_Stre

FDR: 1.805e-01  
Coefficient: -1.54e+04  
Value: omicron

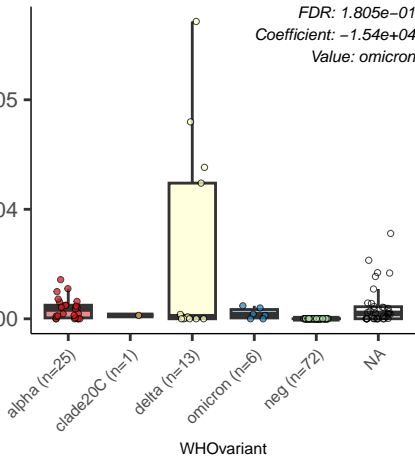

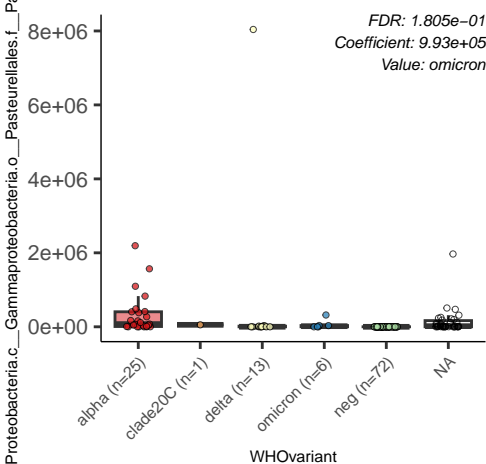

d\_\_Bacteria.p\_\_Firmicutes.c\_\_Bacilli.o\_\_Bacillales.f\_\_Listeriaceae

FDR: 1.809e-01  
Coefficient: -2.36e+03  
Value: delta

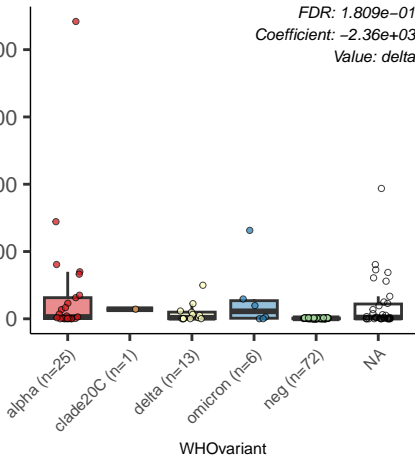

Firmicutes.c\_Bacilli.o\_Bacillales.f\_Listeriaceae.g\_Brochothrix

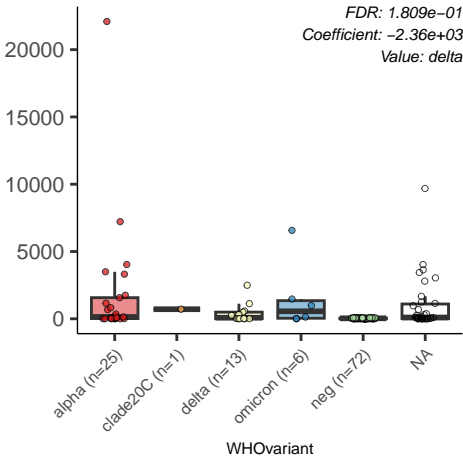

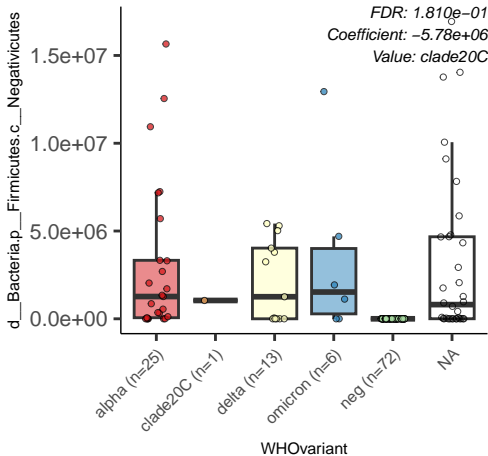

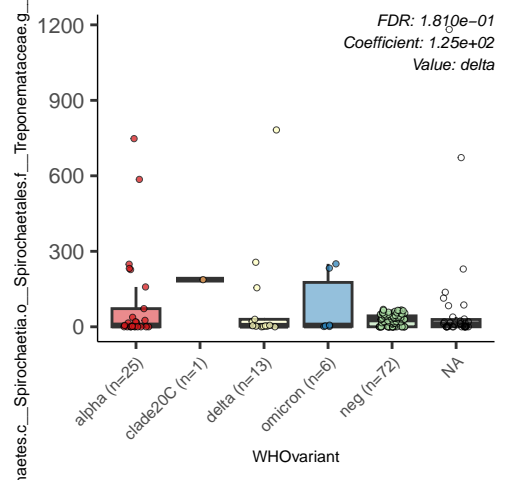

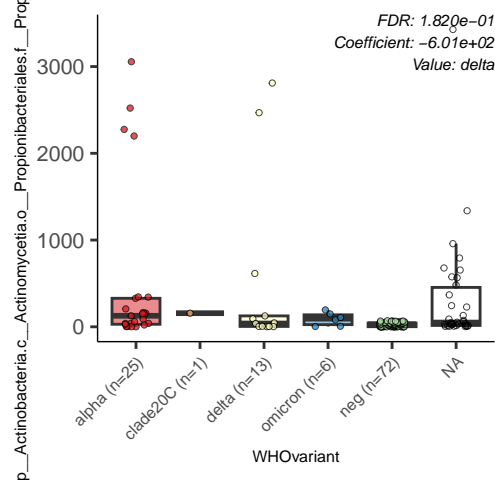



cteria.p\_\_Proteobacteria.c\_\_Alphaproteobacteria.o\_\_Rhodospirillales

FDR: 1.820e-01  
Coefficient: 1.12e+03  
Value: omicron

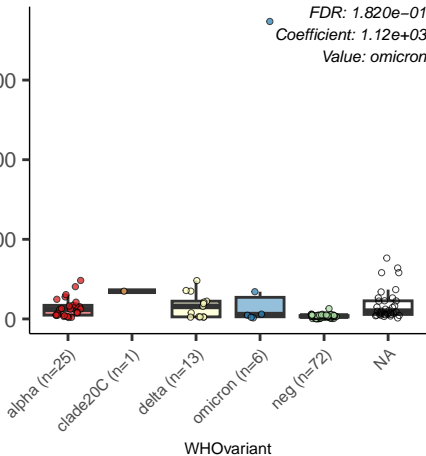

bacteria.p\_\_Firmicutes.c\_\_Clostridia.o\_\_Eubacteriales.f\_\_Eubacteri

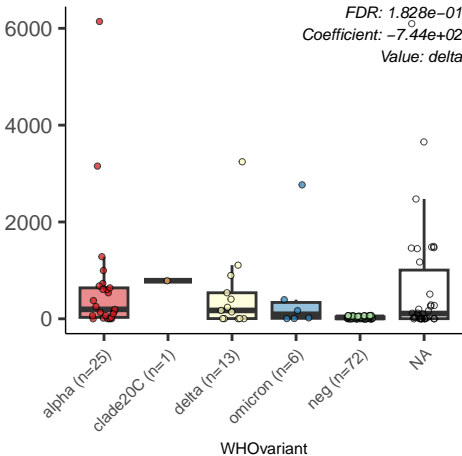

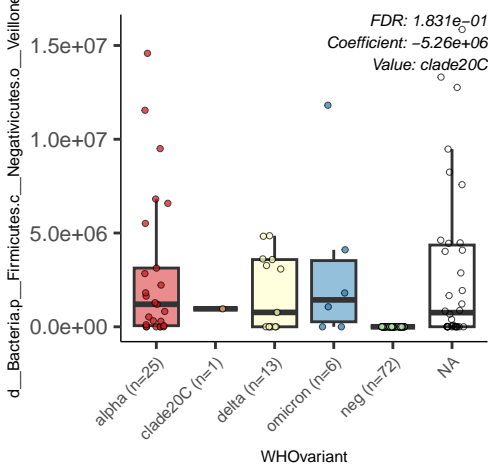

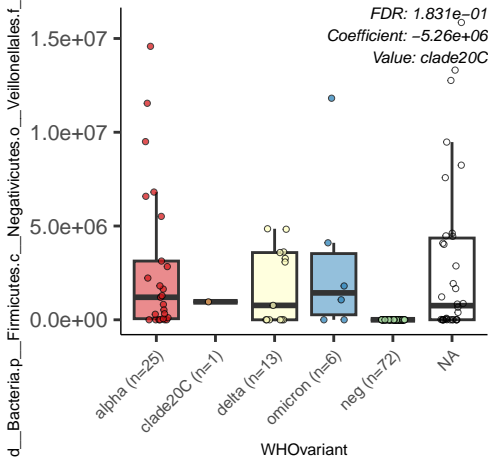

chaetes.c\_\_Spirochaetia.o\_\_Spirochaetales.f\_\_Treponemataceae.g

FDR:  $1.833e-01$   
Coefficient:  $-4.57e+02$   
Value: neg

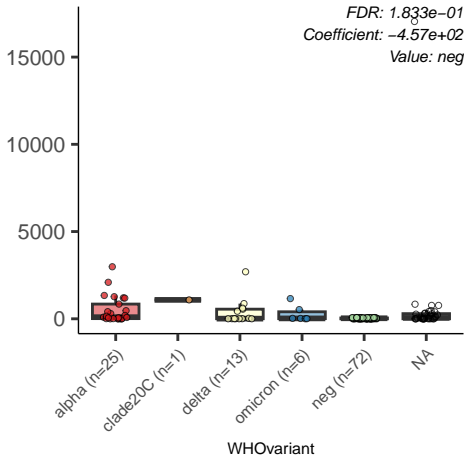

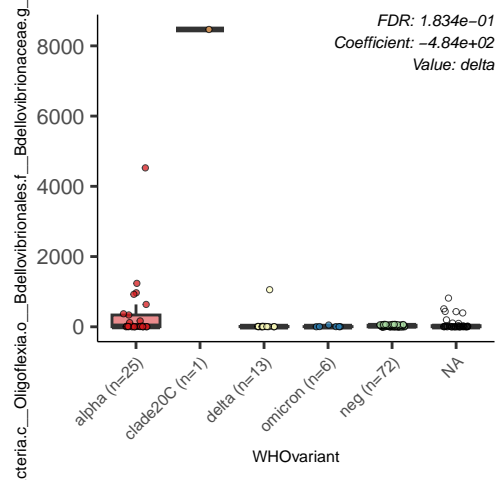

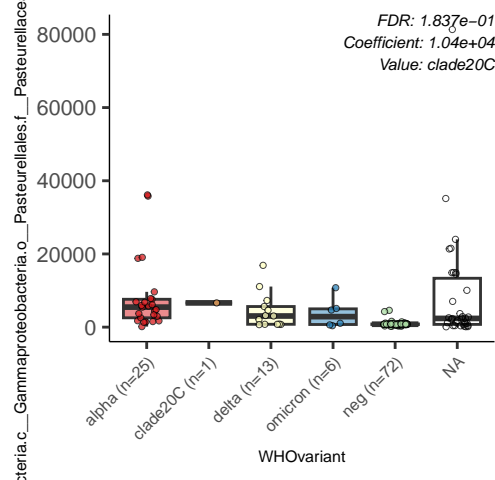

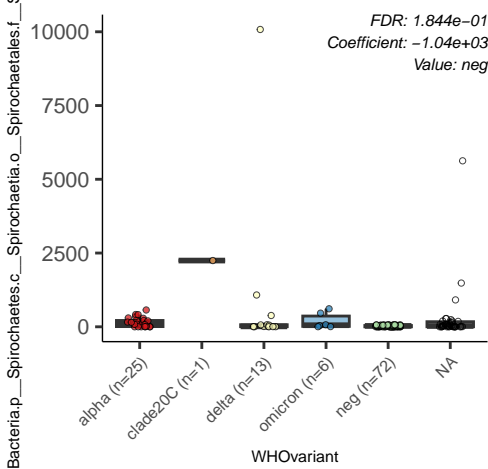



.p\_\_Spirochaetes.c\_\_Spirochaetia.o\_\_Spirochaetales.f\_\_Sphaeroc

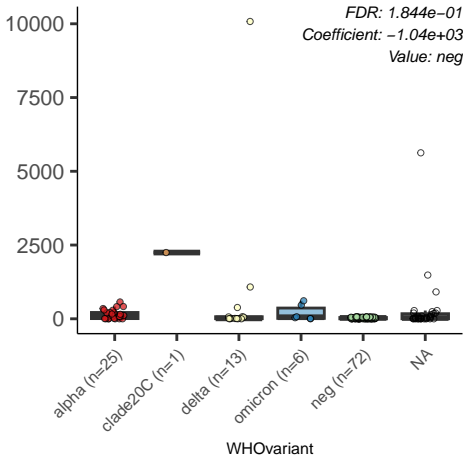

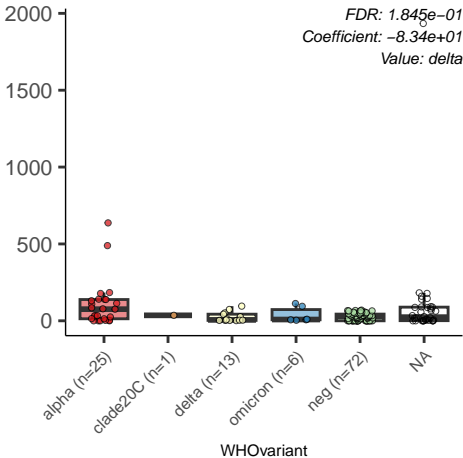

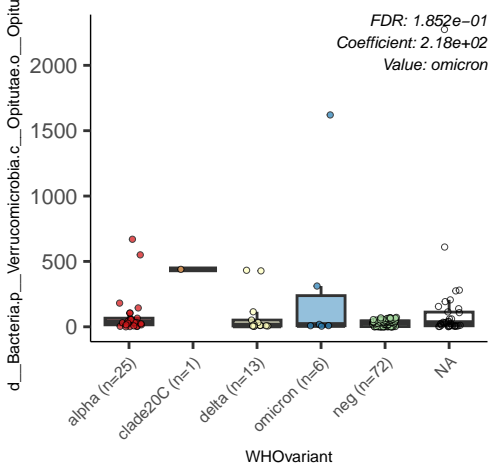

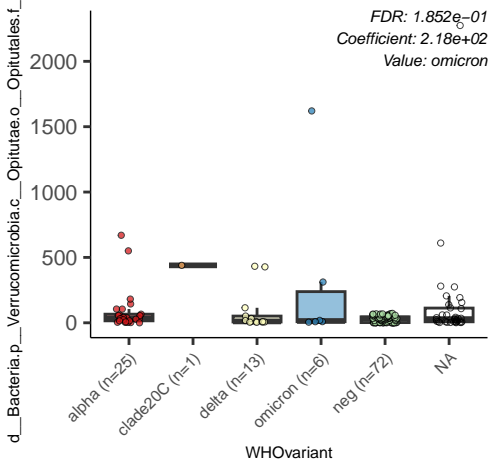

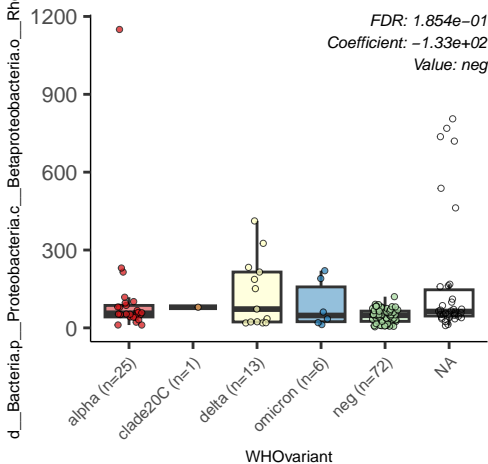

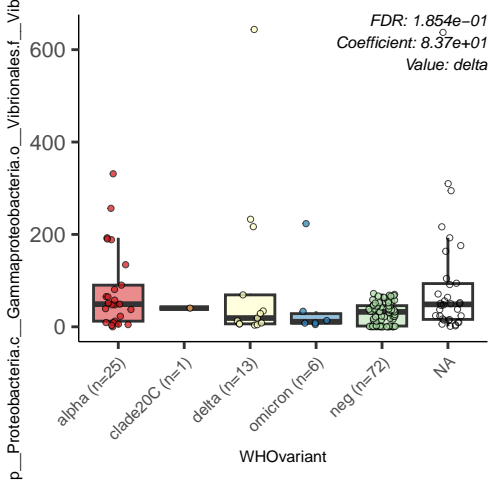

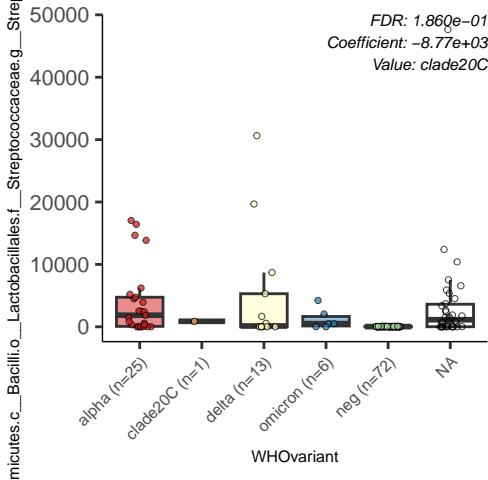

d\_Bacteria.p\_\_Firmicutes.c\_\_Bacilli.o\_\_Bacillales.f\_\_Thermoact

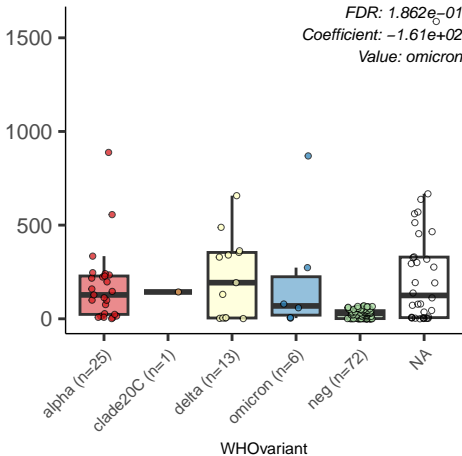



es.c\_\_Negativicutes.o\_\_Selenomonadales.f\_\_Selenomonadaceae.g

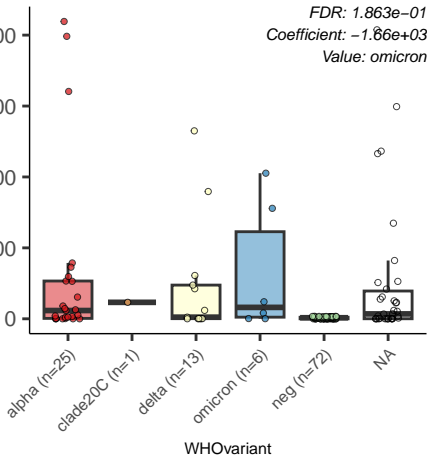

\_\_Bacteria.p\_Firmicutes.c\_Bacilli.o\_Bacillales.f\_Paenibacillace

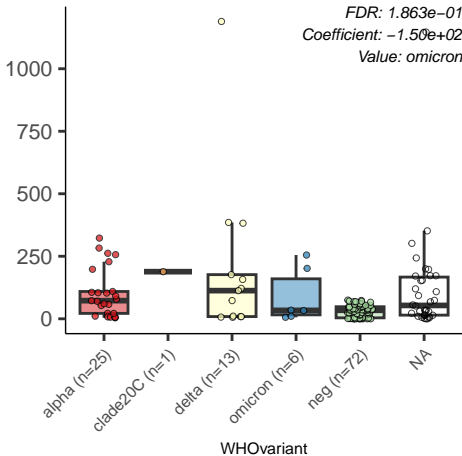

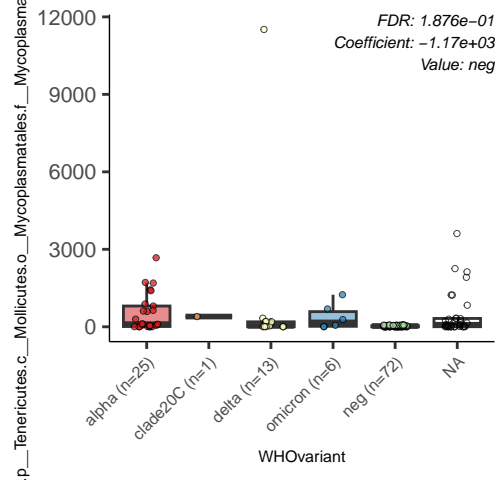

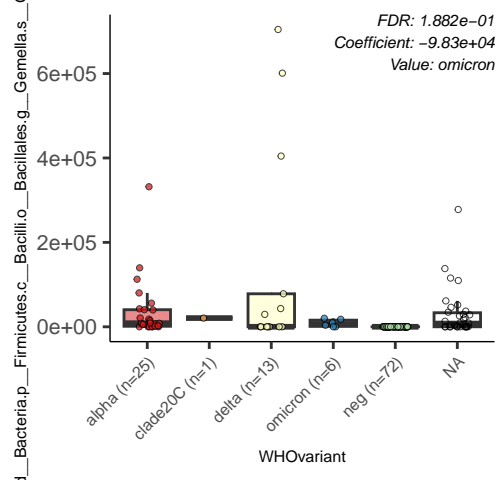

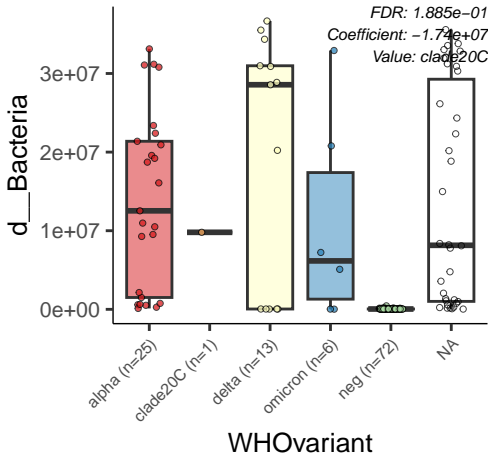

bacteroidetes.c\_\_Bacteroidia.o\_\_Bacteroidales.f\_\_Prevotellaceae.g

FDR: 1.889e-01  
Coefficient: -1.15e+04  
Value: neg

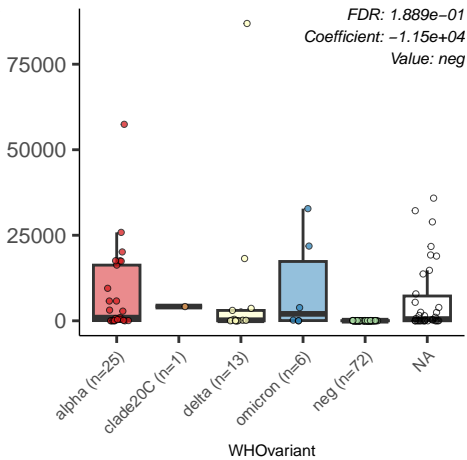

d\_\_Bacteria.p\_\_Firmicutes.c\_\_Tissierellia.o\_\_Tissierellales.f\_\_Pe

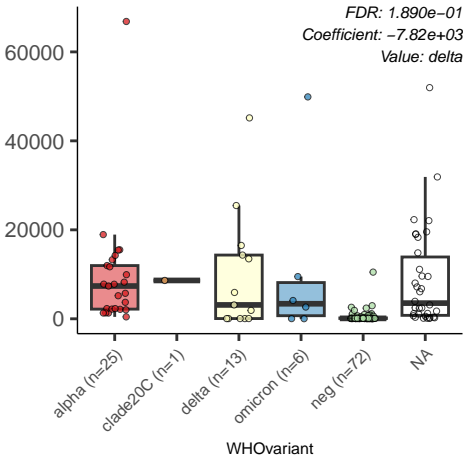

nicutes.c\_\_Negativicutes.o\_\_Selenomonadales.f\_\_Sporomusaceae.

FDR:  $1.890e-01$   
Coefficient:  $-2.55e+02$   
Value: clade20C

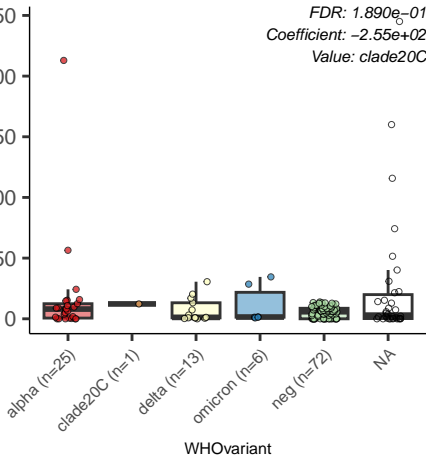



a.p.\_Bacteroidetes.c.\_Cytophagia.o.\_Cytophagales.f.\_Hymenoba

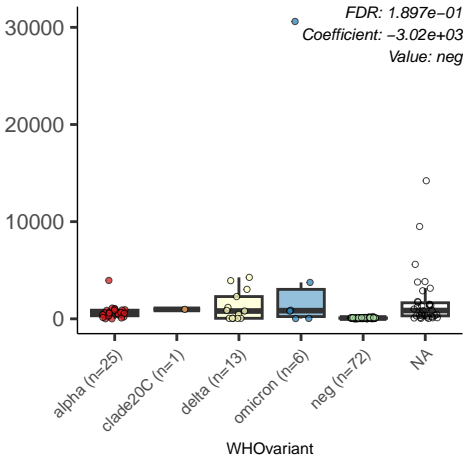

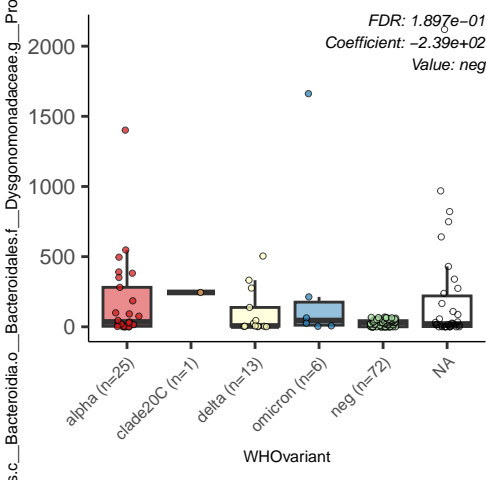

micutes.c\_\_Bacilli.o\_\_Lactobacillales.f\_\_Streptococcaceae.g\_\_Stre

*FDR: 1.901e-01*  
*Coefficient: -1.45e+03*  
*Value: neg*

10000

5000

0

alpha (n=25)

clade20C (n=1)

delta (n=13)

omicron (n=6)

neg (n=72)

NA

WHOvariant

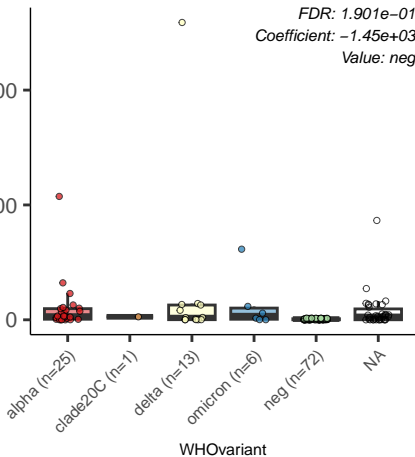

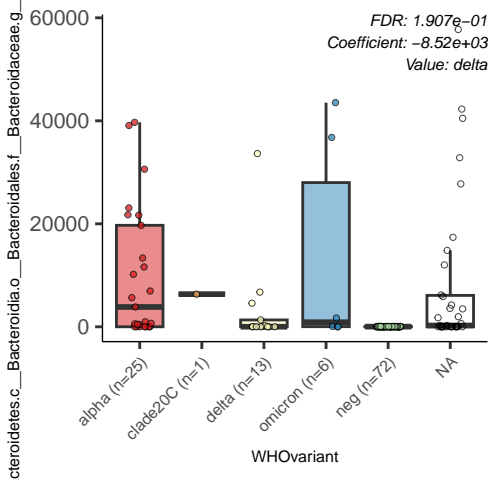



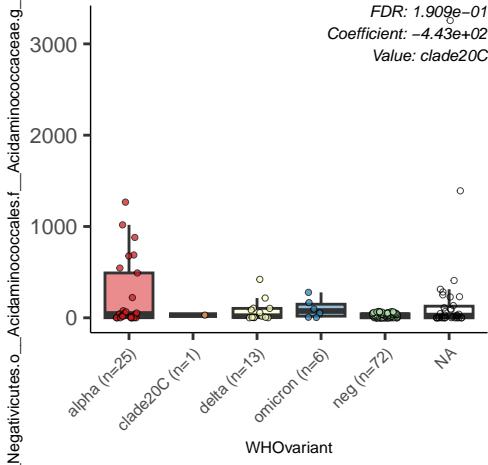

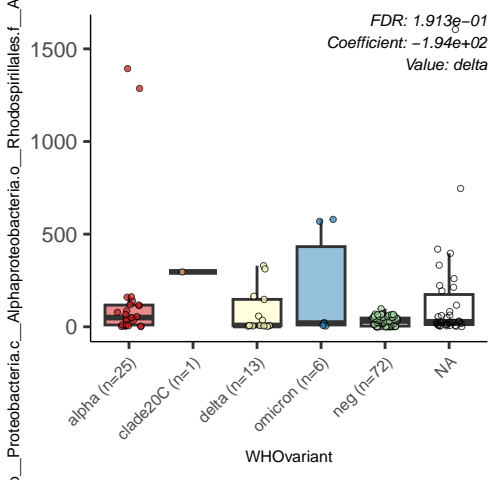

phylum: Bacteroidetes, class: Sphingobacteriia, order: Sphingobacteriales, family: Sphingobacteriaceae, genus: Sphingobacterium, species: Sphingobacterium

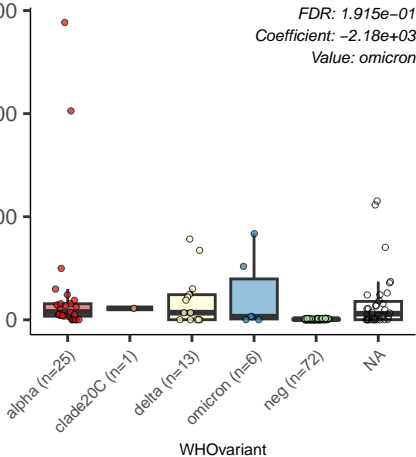



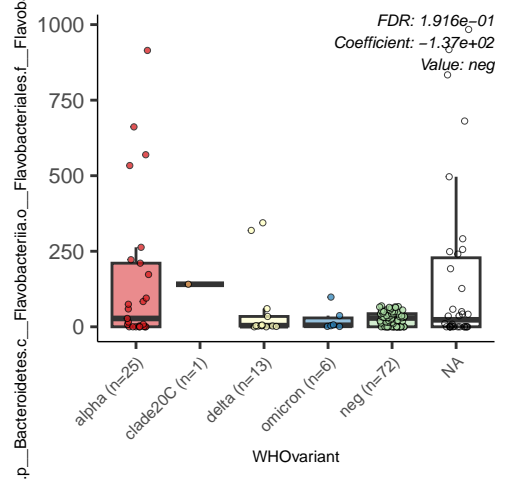

idetes.c\_\_Flavobacteriia.o\_\_Flavobacteriales.f\_\_Flavobacteriaceae.

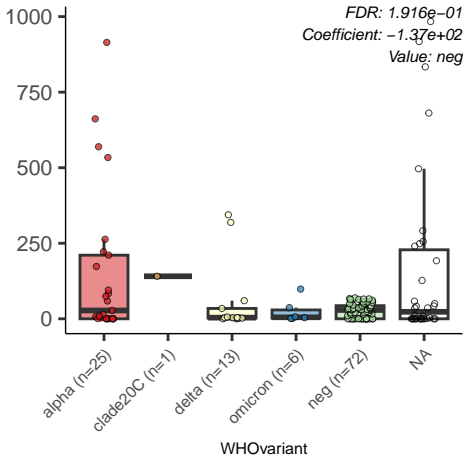

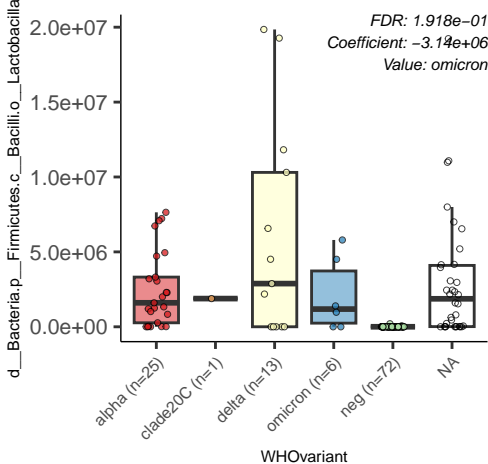

s.c.\_Clostridia.o\_Eubacteriales.f\_Lachnospiraceae.g\_Lachnoclostridium

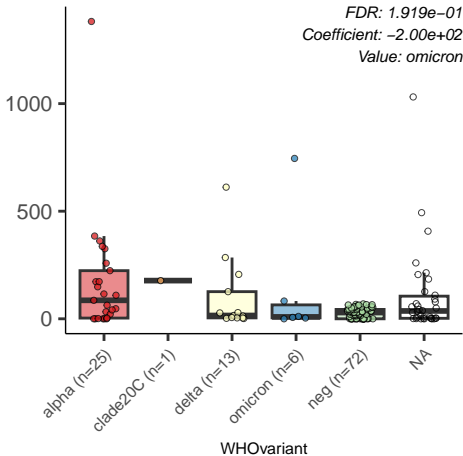

Firmicutes.c\_\_Bacilli.o\_\_Lactobacillales.f\_\_Streptococcaceae.g\_\_St

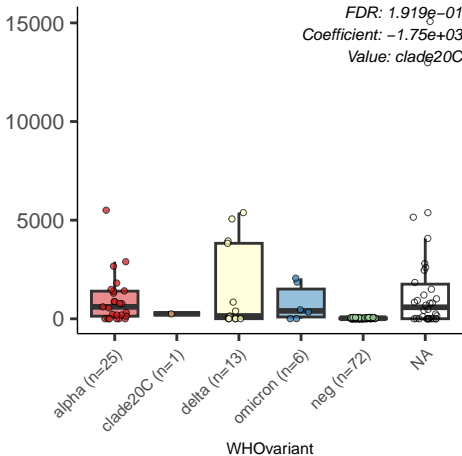

FDR:  $1.920e-01$   
Coefficient:  $-3.87e+02$   
Value: delta

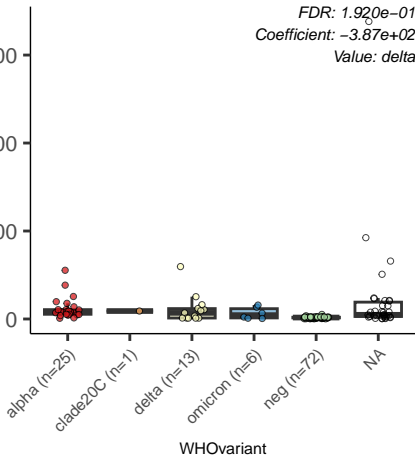

ria.c\_Fusobacteriia.o\_Fusobacteriales.f\_Leptotrichiaceae.g\_Le

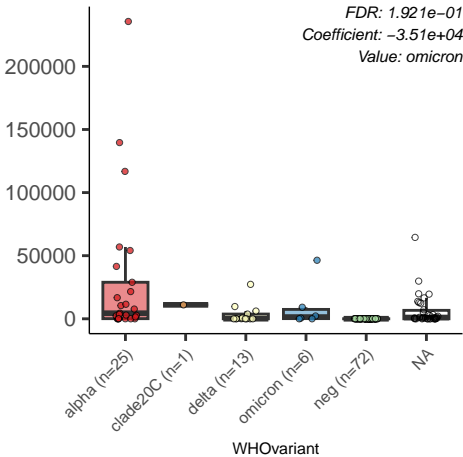

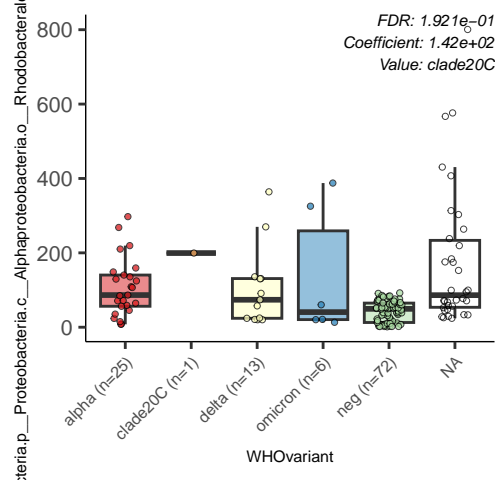



micutes.c\_\_Bacilli.o\_\_Lactobacillales.f\_\_Streptococcaceae.g\_\_Strep

FDR:  $1.921 \times 10^{-1}$   
Coefficient:  $-9.61 \times 10^2$   
Value: neg

10000

5000

0

alpha (n=25)

clade20C (n=1)

delta (n=13)

omicron (n=6)

neg (n=72)

NA

WHOvariant

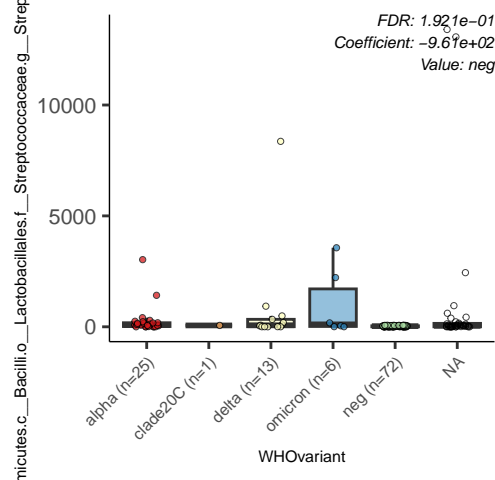

ia.p\_\_Proteobacteria.c\_\_Gammaproteobacteria.o\_\_Xanthomonada

FDR:  $1.929e-01$   
Coefficient:  $-6.87e+01$   
Value: omicron

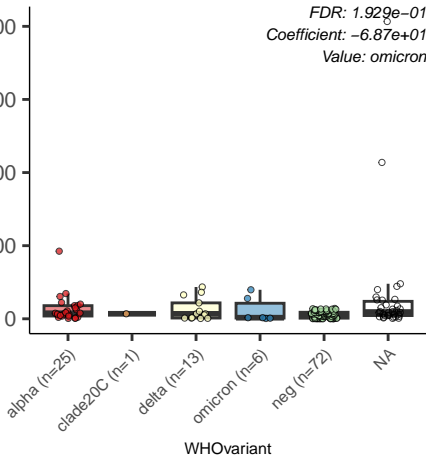

bacteria.c\_\_Betaproteobacteria.o\_\_Neisseriales.f\_\_Neisseriaceae.g

FDR: 1.935e-01  
Coefficient: 3.82e+03  
Value: omicron

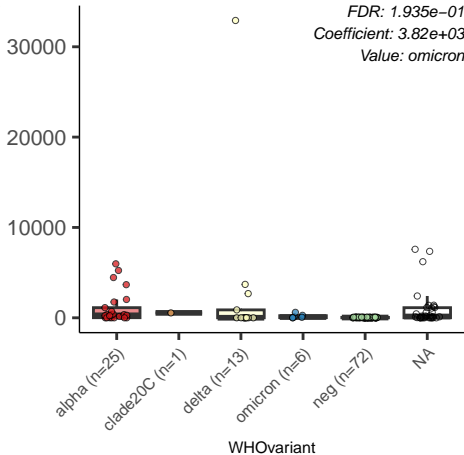

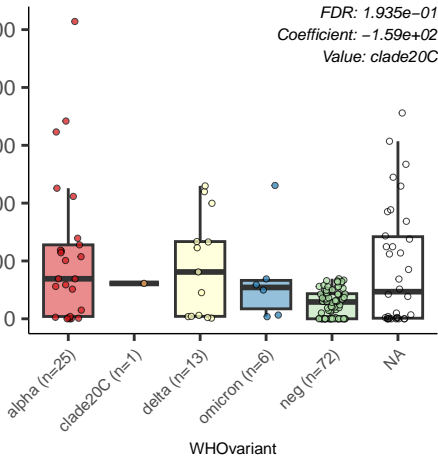

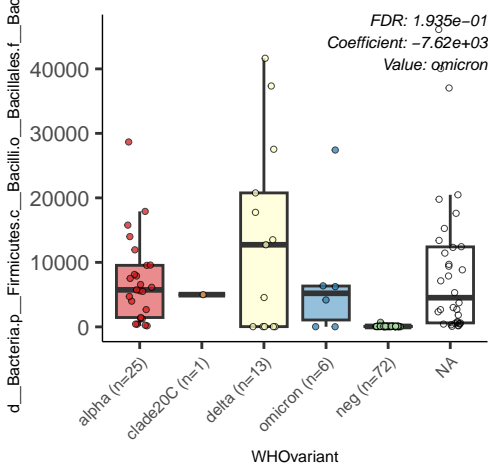

cutes.c\_\_Bacilli.o\_\_Lactobacillales.f\_\_Streptococcaceae.g\_\_Strepto

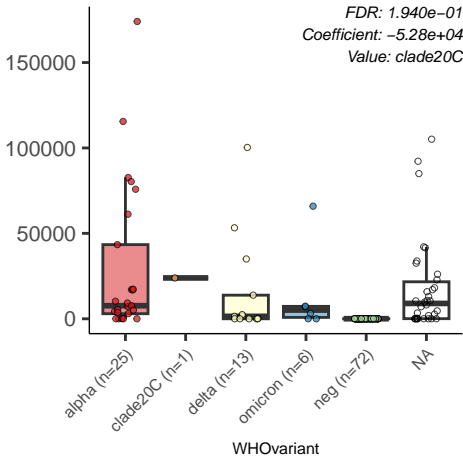

s.c\_Flavobacteriia.o\_Flavobacteriales.f\_Weeksellaceae.g\_Chry

FDR: 1.942e-01  
Coefficient: -4.32e+02  
Value: delta

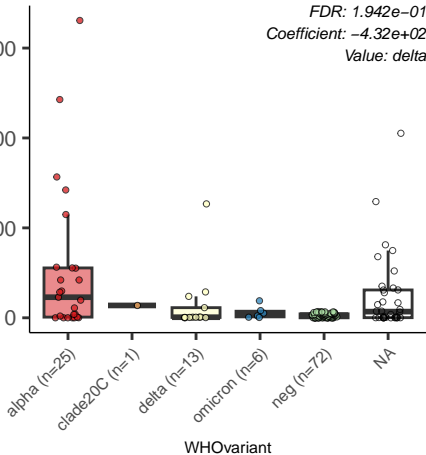

eria.p\_\_Bacteroidetes.c\_\_Flavobacteriia.o\_\_Flavobacteriales.f\_\_We

$FDR: 1.951e-01$   
 $Coefficient: -3.79e+02$   
 $Value: delta$

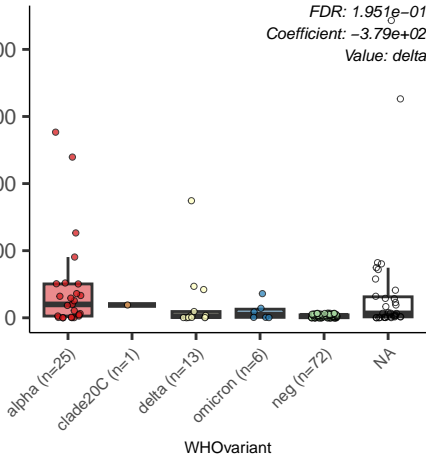



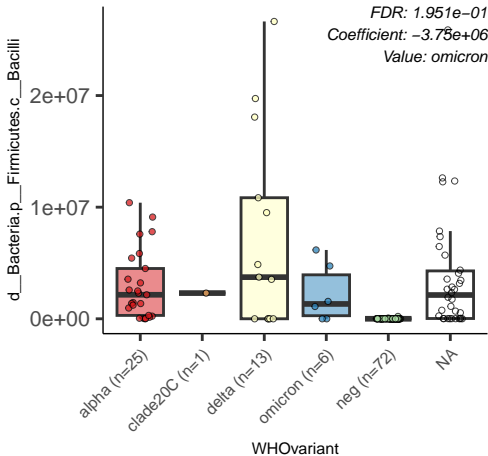

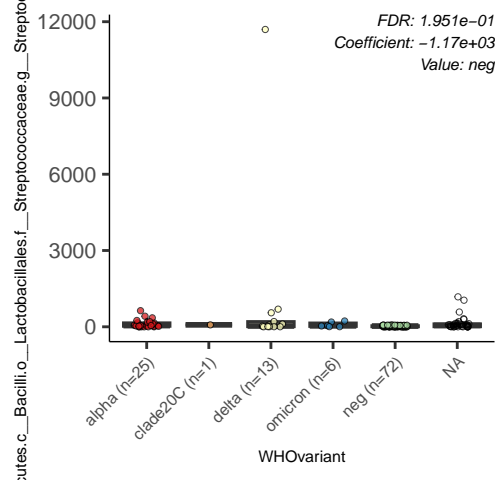

Actinomyces

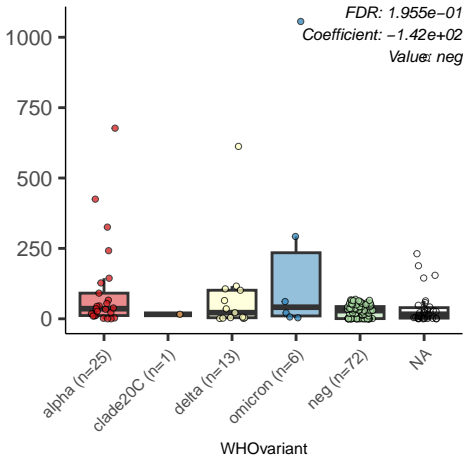

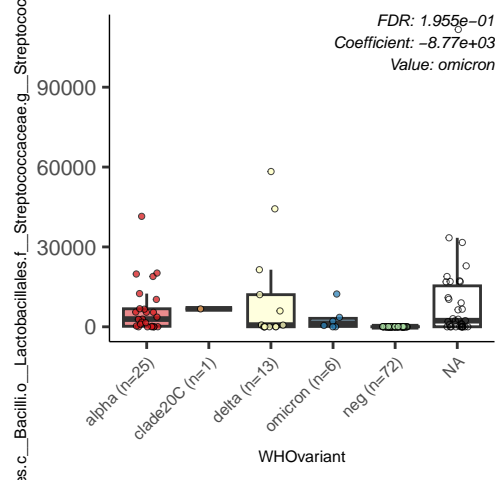

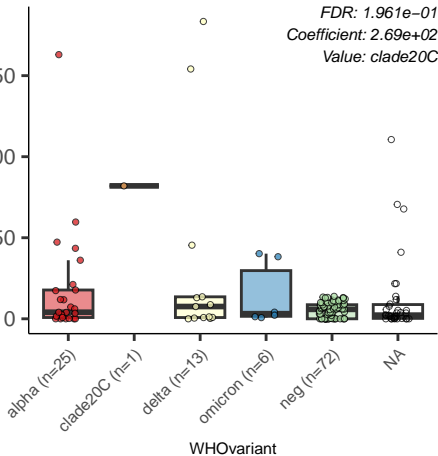

tes.o\_\_Mycoplasmatales.f\_\_Mycoplasmataceae.g\_\_Candidatus.Hep

*FDR: 1.961e-01*  
*Coefficient: 2.69e+02*  
*Value: clade20C*

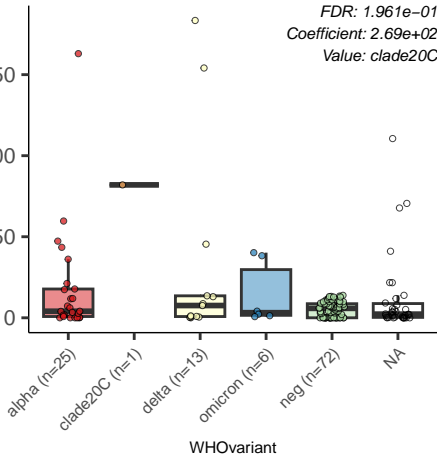

Actinomycetia.o\_\_Corynebacteriales.f\_\_Corynebacteriaceae.g

FDR:  $1.962e-01$   
Coefficient:  $-8.32e+02$   
Value: neg

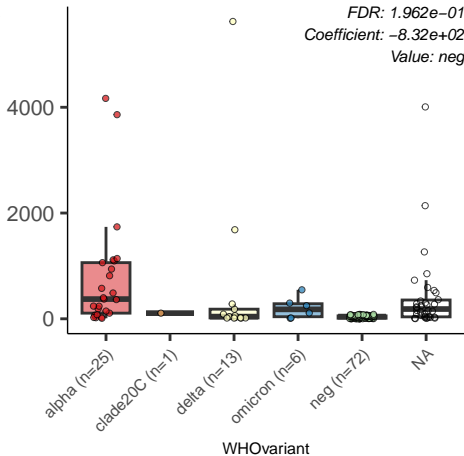

d\_\_Bacteria.p\_\_Firmicutes.c\_\_Clostridia.o\_\_Thermoanaerob

FDR:  $1.963e-01$   
Coefficient:  $-4.77e+02$   
Value: omicron

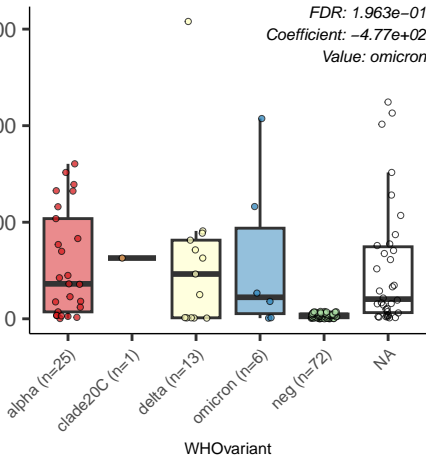



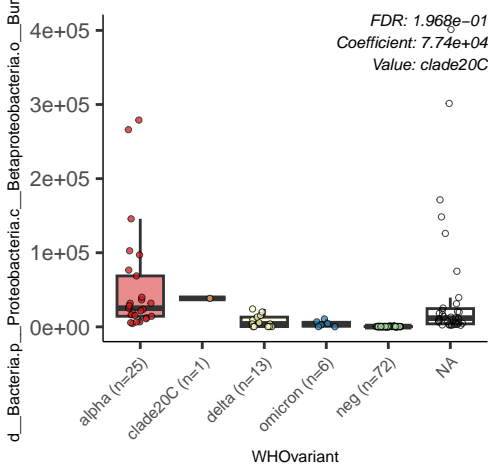

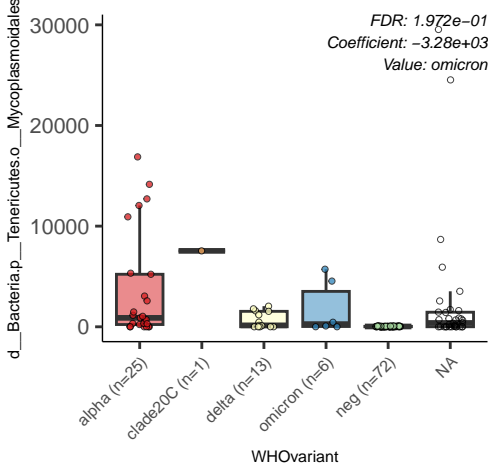

Actinomycetia.o\_\_Corynebacteriales.f\_\_Corynebacteriaceae.g

FDR: 1.979e-01  
Coefficient: -8.31e+02  
Value: neg

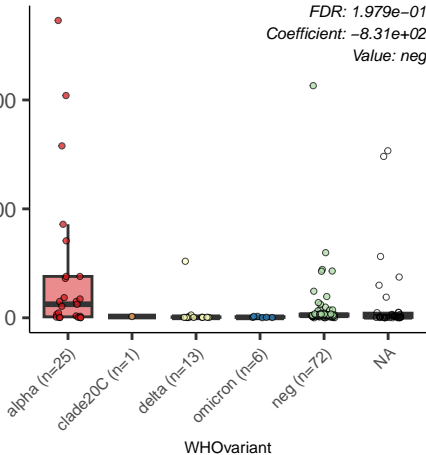

d\_Bacteria.p\_\_Fibrobacteres

FDR: 1.982e-01  
Coefficient: -6.49e+01  
Value: delta

alpha (n=25)

clade20C (n=1)

delta (n=13)

omicron (n=6)

neg (n=72)

NA

WHOvariant

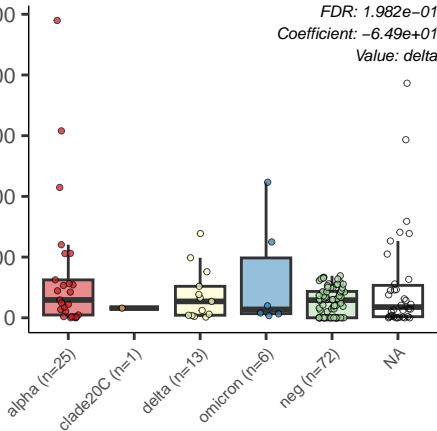

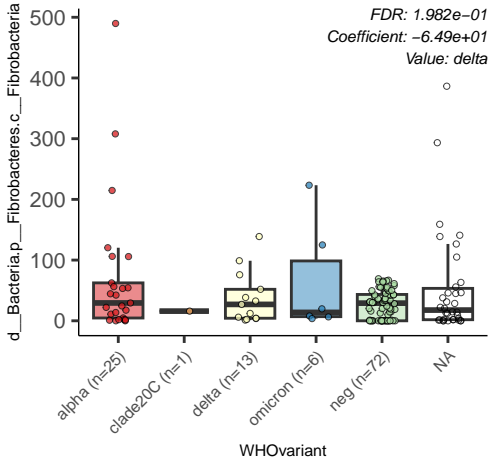

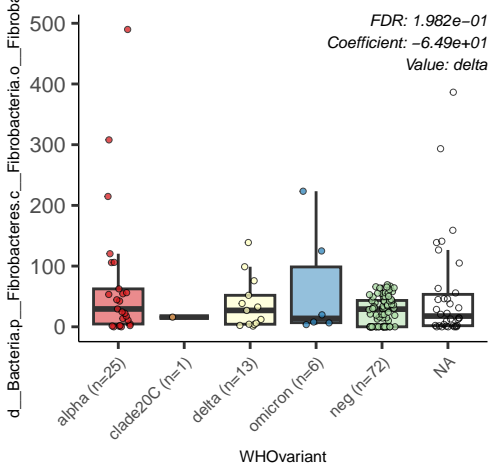

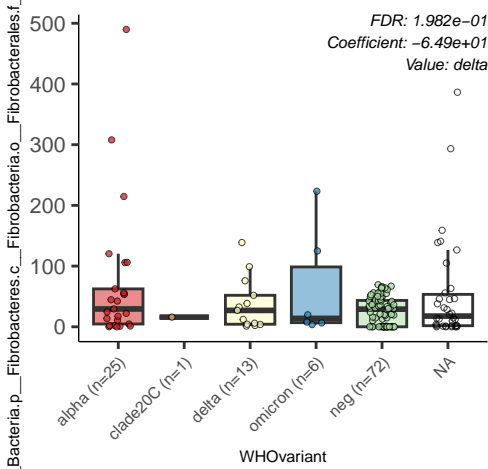

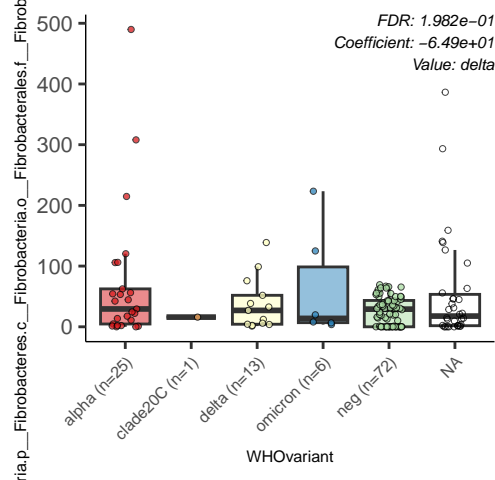



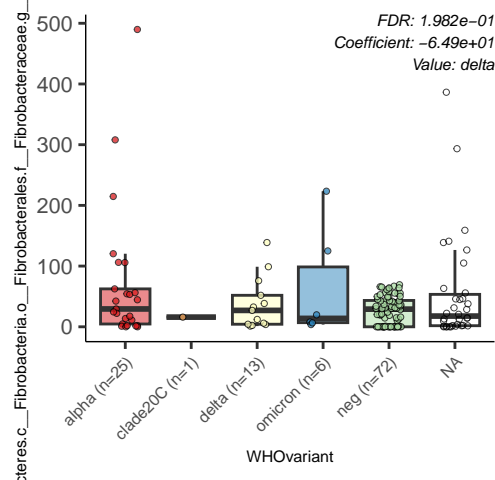

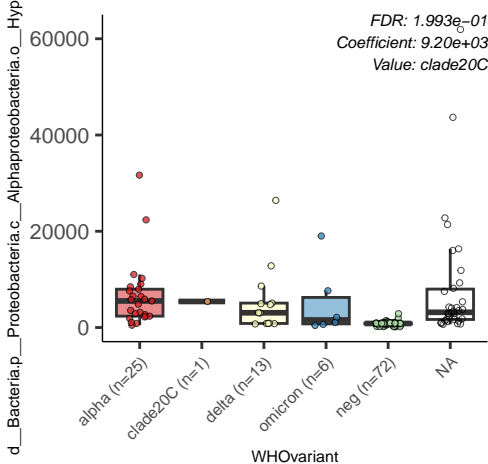

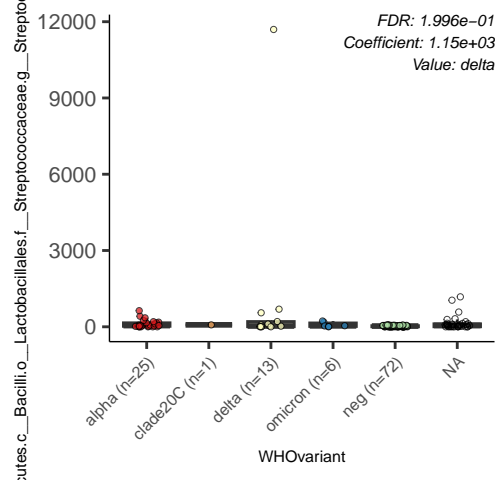

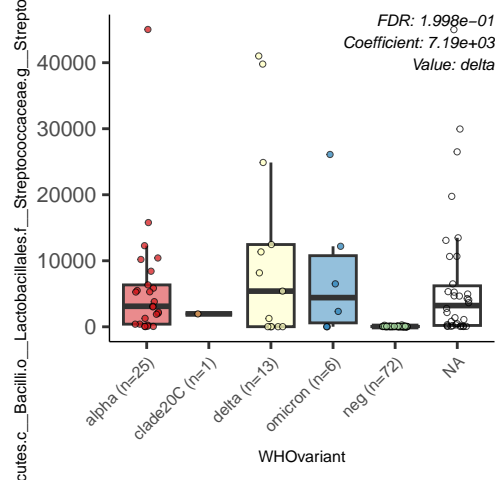

es.c\_Bacilli.o\_Lactobacillales.f\_Streptococcaceae.g\_Streptococ

FDR:  $1.998e-01$   
Coefficient:  $7.32e+03$   
Value: delta

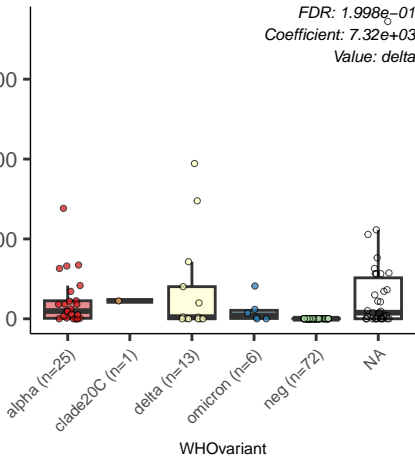

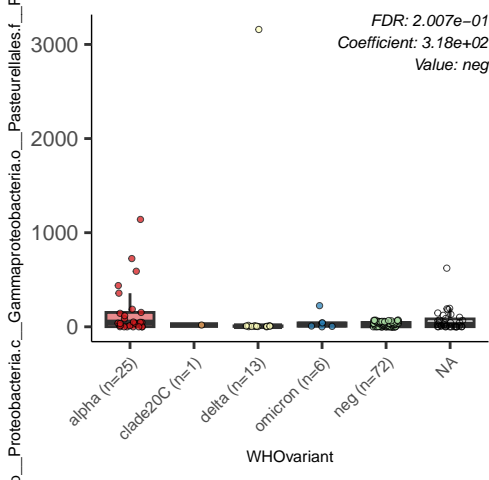

bacteria.c\_\_Gammaproteobacteria.o\_\_Pasteurellales.f\_\_Pasteurella

*FDR: 2.007e-01*  
*Coefficient: 3.18e+02*  
*Value: neg*

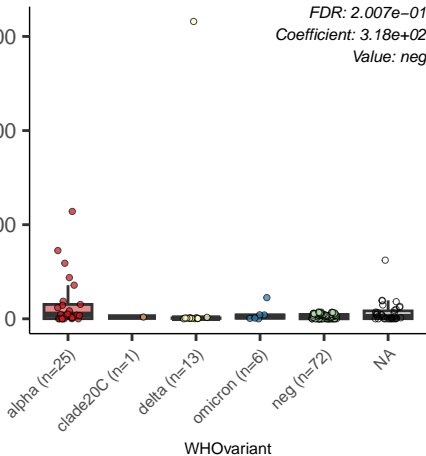

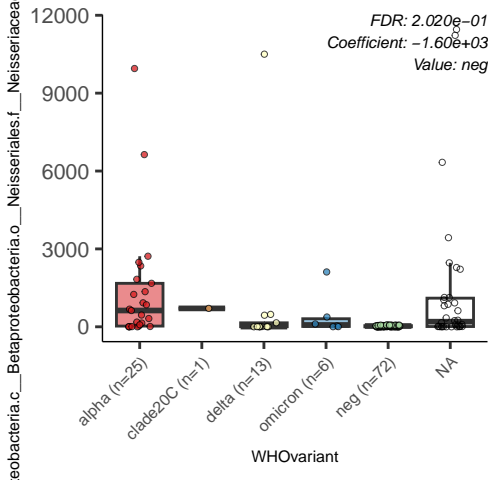



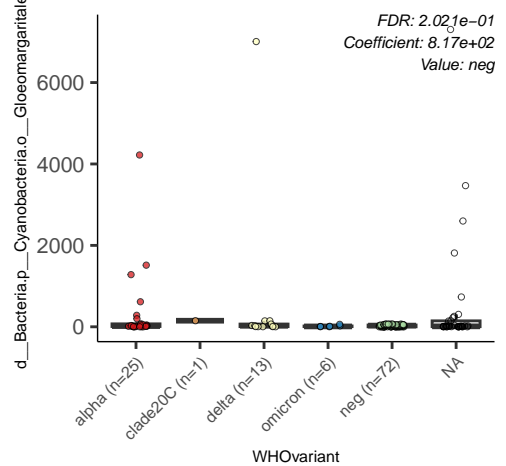

FDR: 2.021e-01  
Coefficient: 8.17e+02  
Value: neg

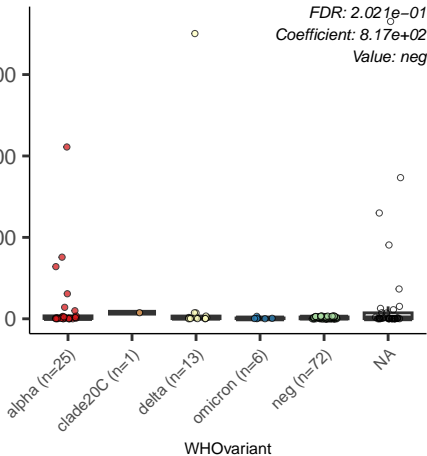

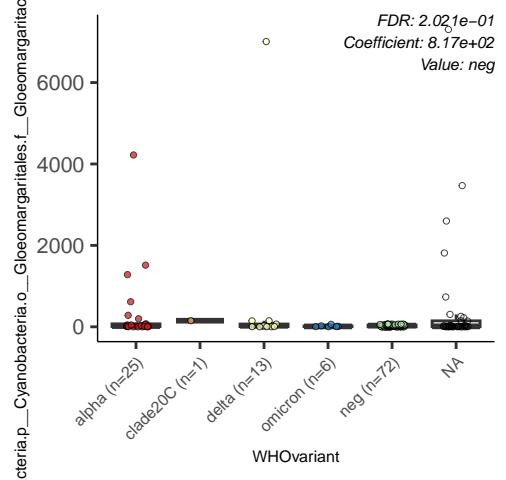



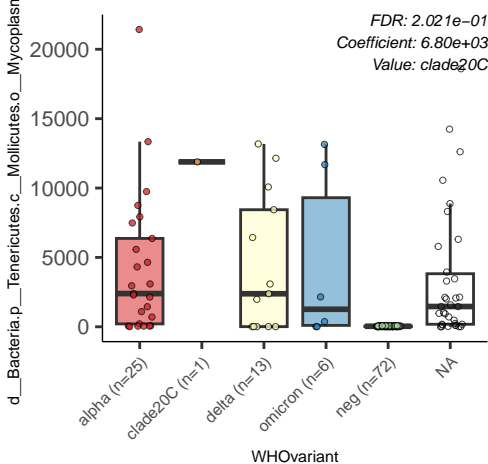

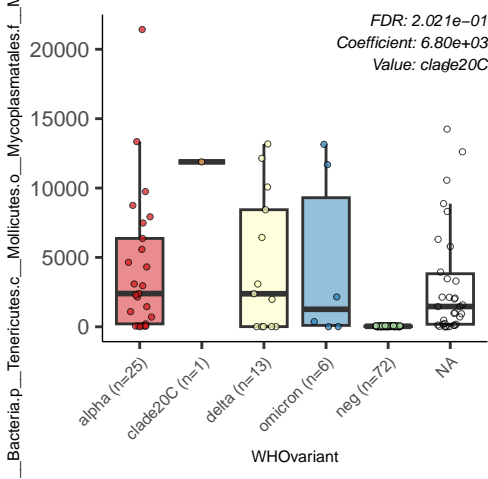

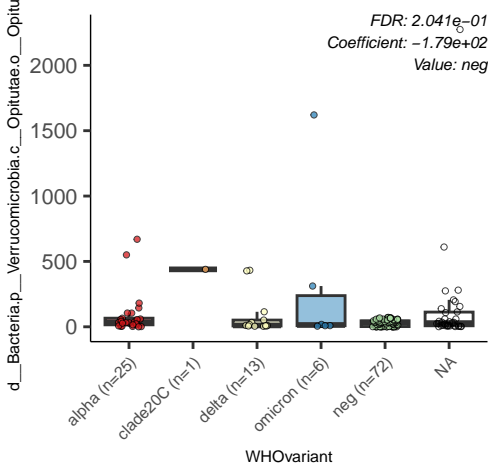

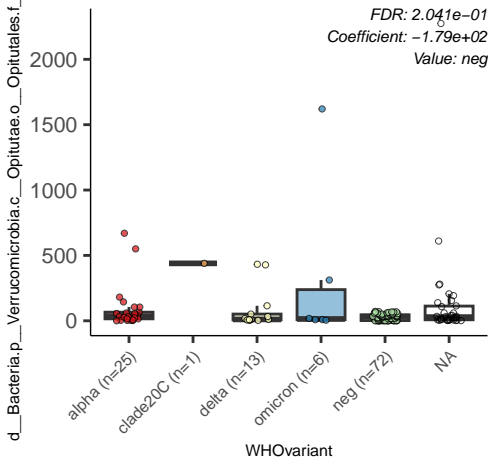



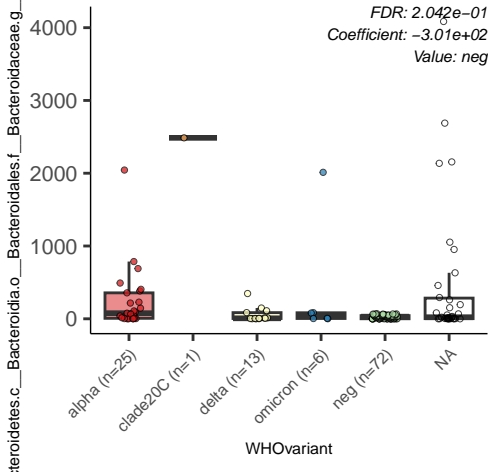

ia.c\_\_Alphaproteobacteria.o\_\_Rhodobacterales.f\_\_Rhodobacterace

FDR: 2.044e-01  
Coefficient: -3.70e+02  
Value: delta

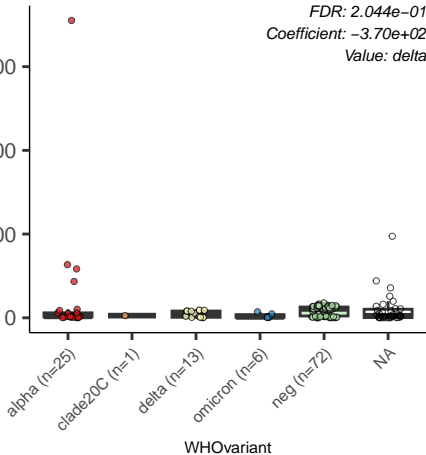

a.p\_\_Firmicutes.c\_\_Clostridia.o\_\_Eubacteriales.f\_\_Peptostreptococ

FDR: 2.044e-01  
Coefficient: -8.78e+02  
Value: omicron

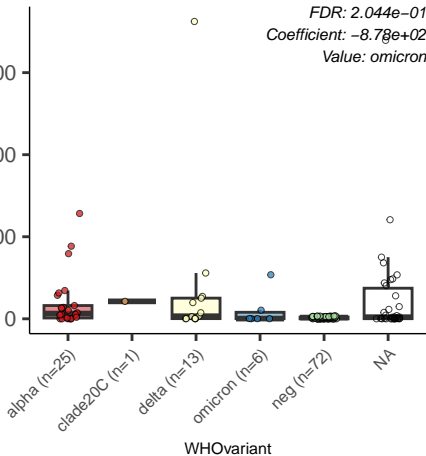

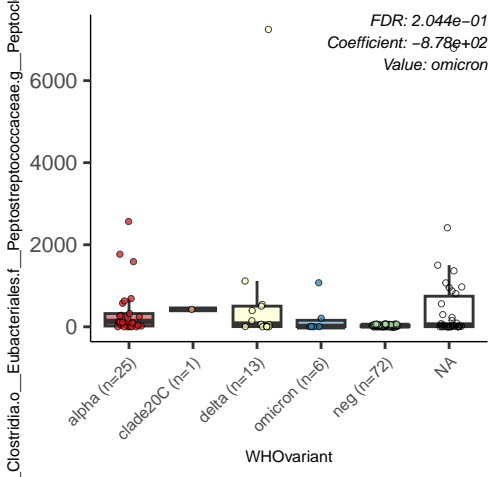

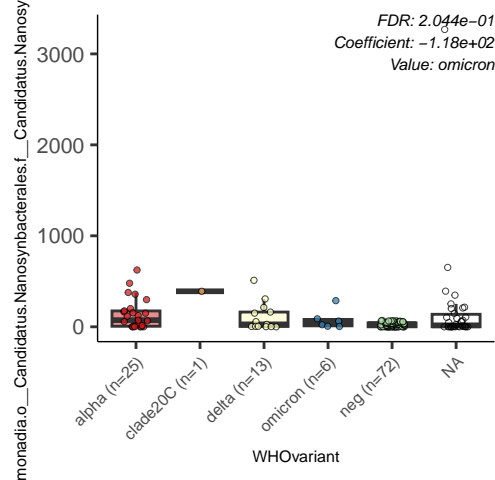

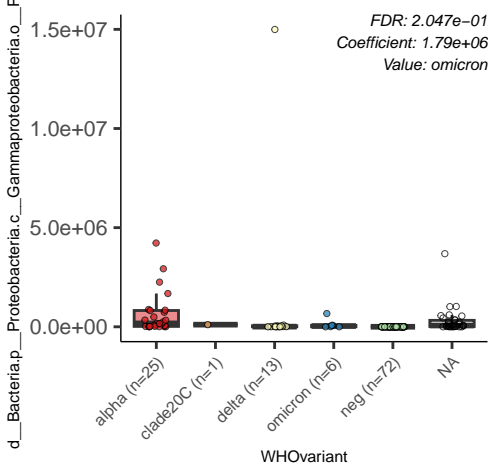

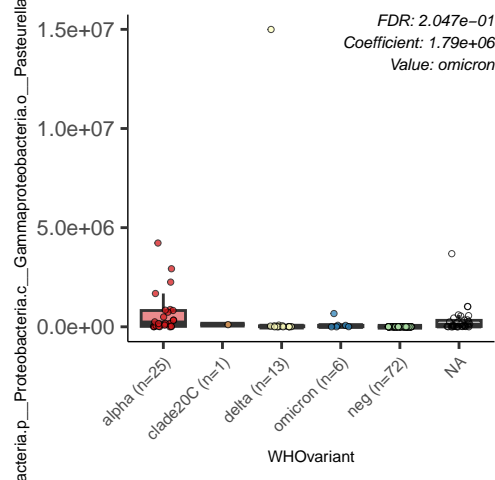

idetes.c\_\_Bacteroidia.o\_\_Bacteroidales.f\_\_Tannerellaceae.g\_\_Para

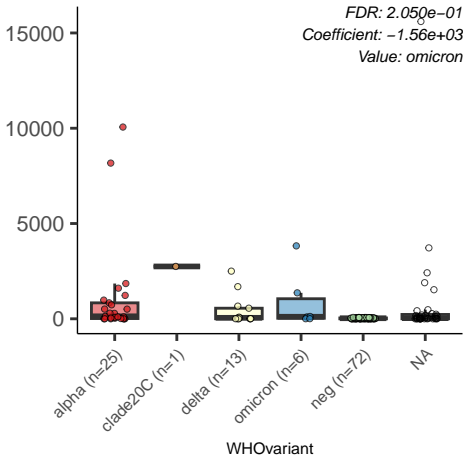



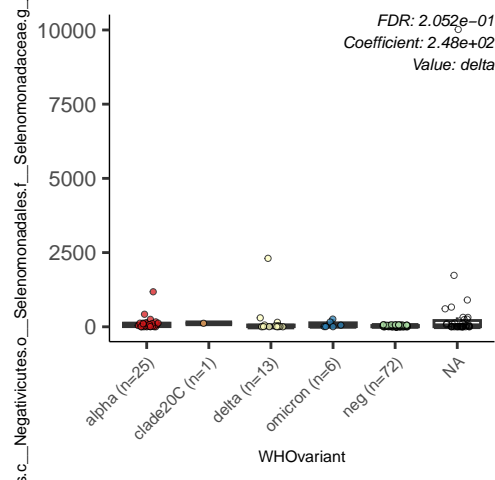

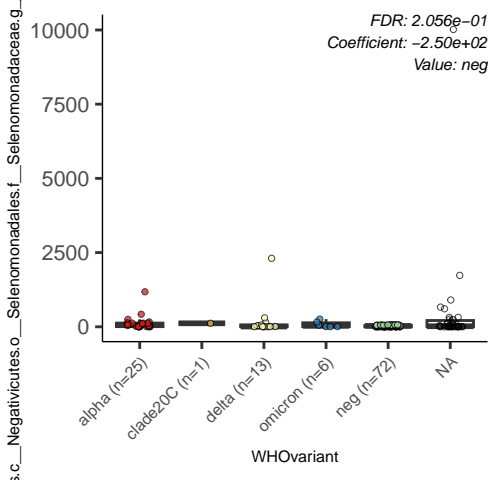

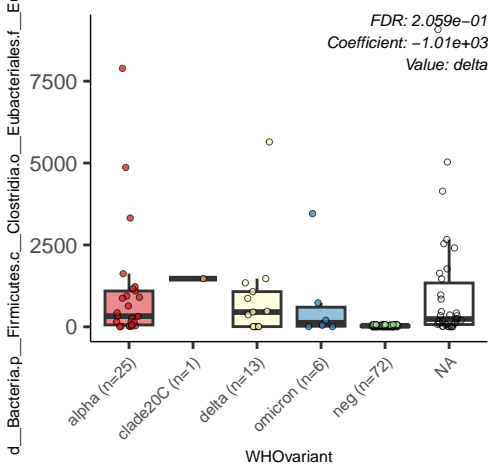

bacteria.p\_\_Proteobacteria.c\_\_Betaproteobacteria.o\_\_Burkholderiales

*FDR: 2.060e-01*  
*Coefficient: -2.68e+04*  
*Value: delta*

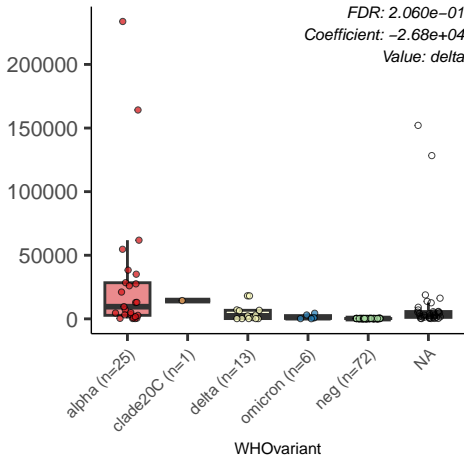

s.c.\_Clostridia.o\_\_Eubacteriales.f\_\_Eubacteriales.Family.XIII..Incert

FDR: 2.062e-01  
Coefficient: -1.03e+03  
Value: omicron

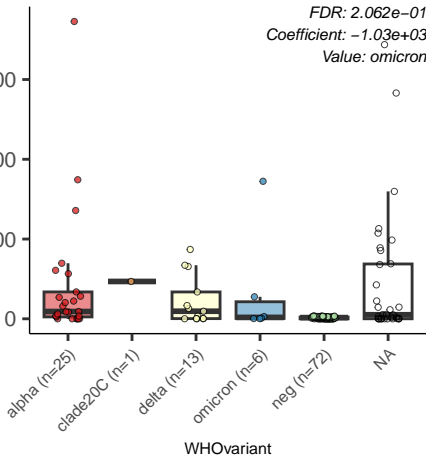

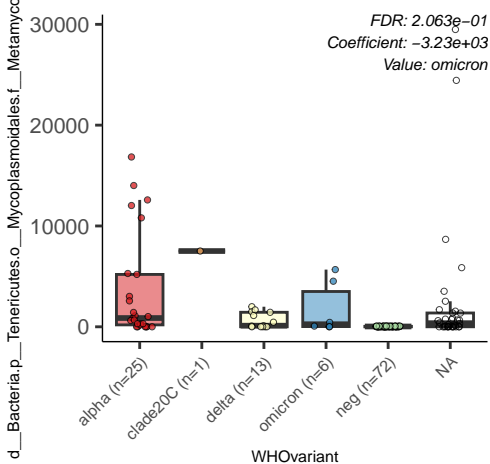

eria.p\_\_Tenericutes.o\_\_Mycoplasmoidales.f\_\_Metamycoplasmatac

FDR: 2.063e-01  
Coefficient: -3.23e+03  
Value: omicron

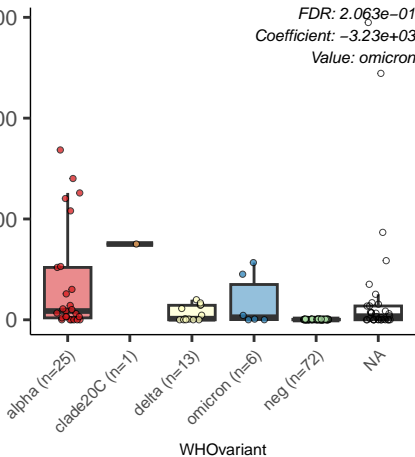

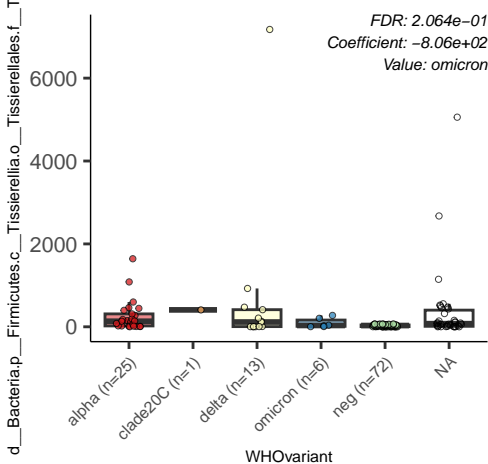



bacteria.p\_\_Proteobacteria.c\_\_Gammaproteobacteria.o\_\_Alteromonad

FDR: 2.071e-01  
Coefficient: 3.19e+02  
Value: delta

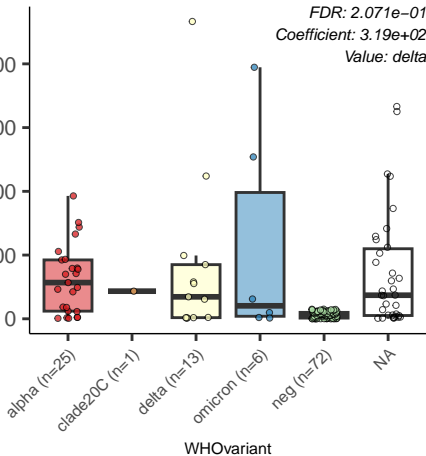

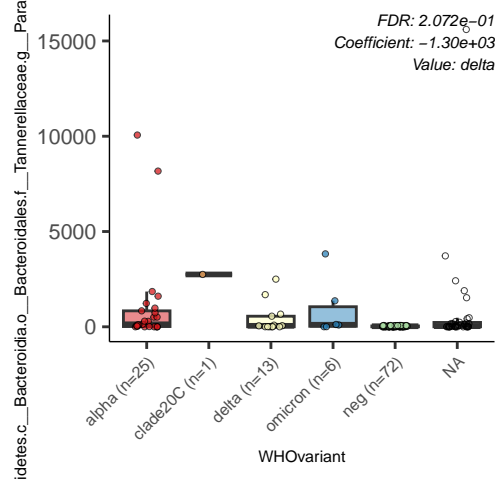

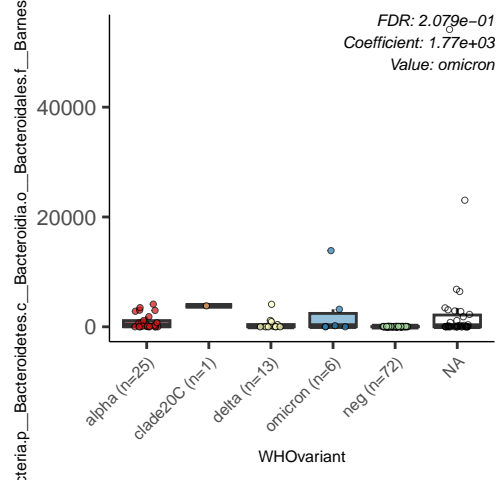

teroidetes.c\_\_Bacteroidia.o\_\_Bacteroidales.f\_\_Barnesiellaceae.g

FDR:  $2.079 \times 10^{-1}$   
Coefficient:  $1.77 \times 10^3$   
Value: omicron

40000

20000

0

alpha (n=25)

clade20C (n=1)

delta (n=13)

omicron (n=6)

neg (n=72)

NA

WHOvariant

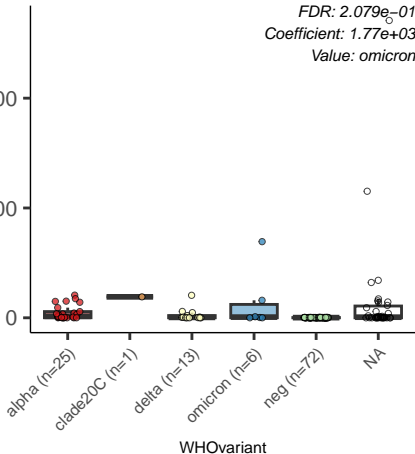

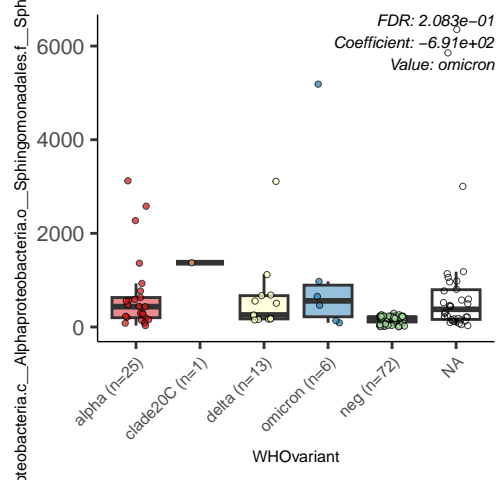

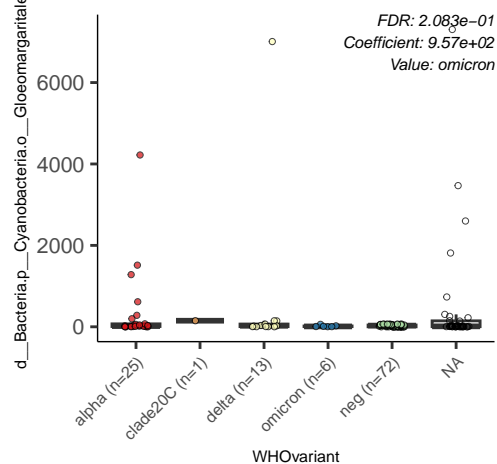

d\_Bacteria.p\_\_Cyanobacteria.o\_\_Gloeomargaritales.f\_\_Gloe

FDR: 2.083e-01  
Coefficient: 9.57e+02  
Value: omicron

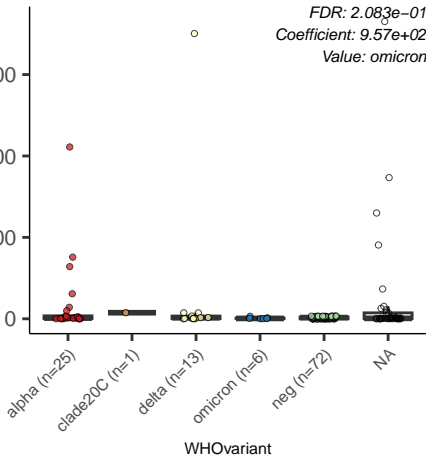

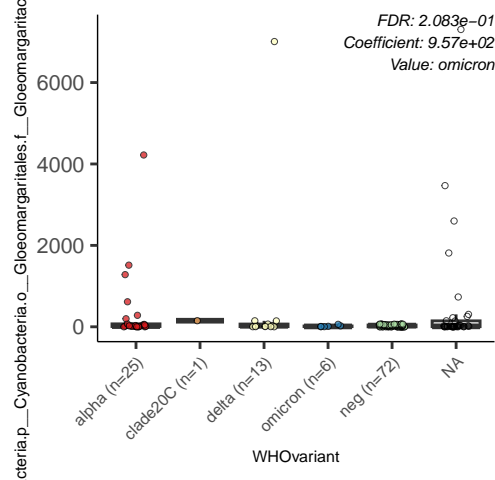





cteria.p\_\_Proteobacteria.c\_\_Alphaproteobacteria.o\_\_Rhodospirillales

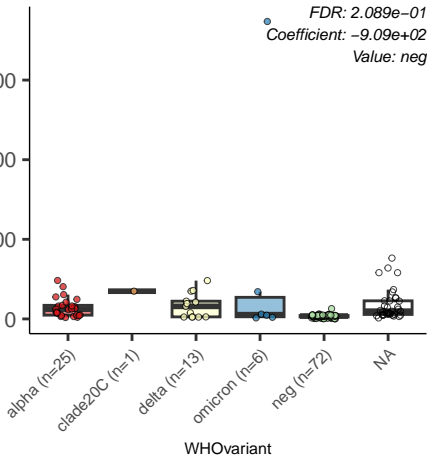

eroidetes.c\_\_Bacteroidia.o\_\_Bacteroidales.f\_\_Bacteroidaceae.g\_\_B

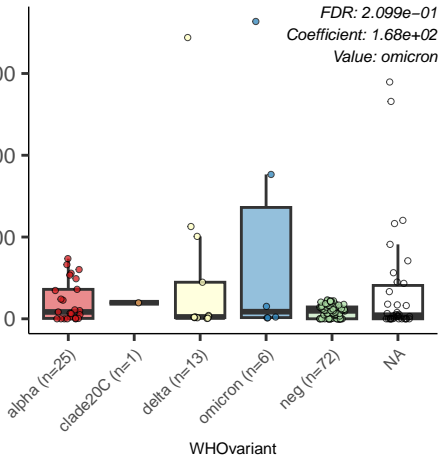

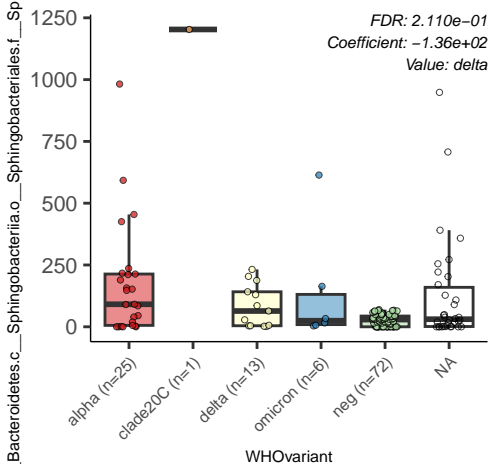

p\_Fusobacteria.c\_Fusobacteria.o\_Fusobacteriales.f\_Leptotrich

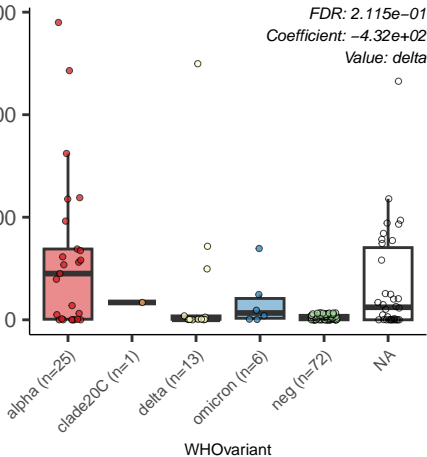

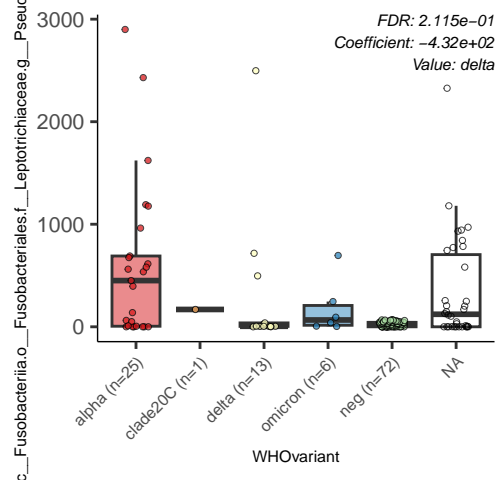

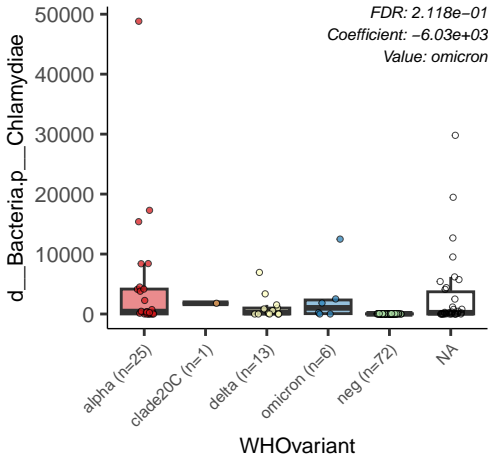

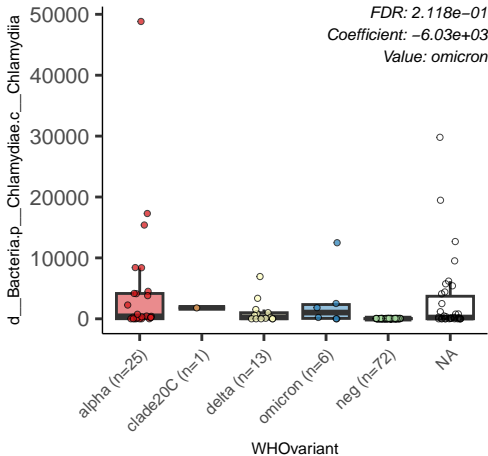



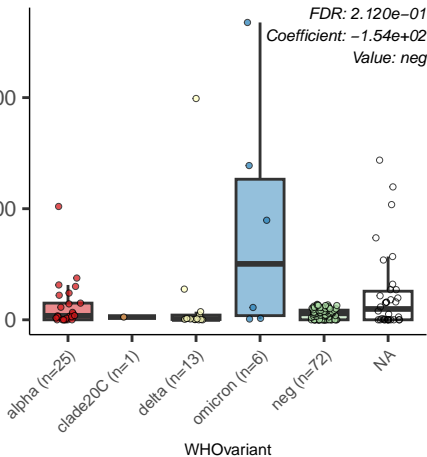

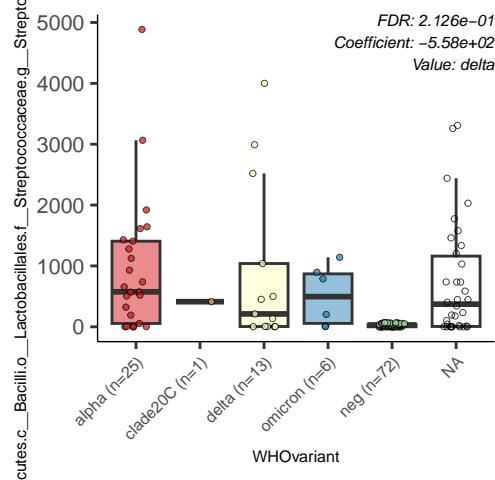

irria.p\_\_Proteobacteria.c\_\_Gammaproteobacteria.o\_\_Enterobactera

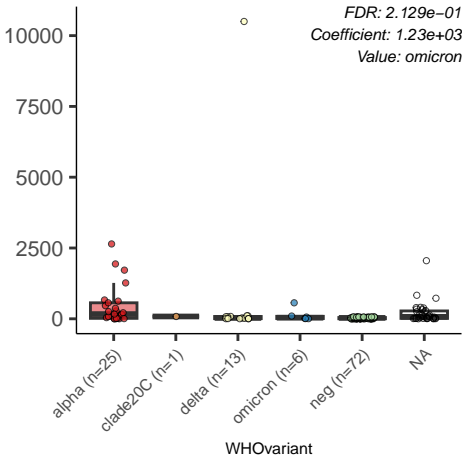

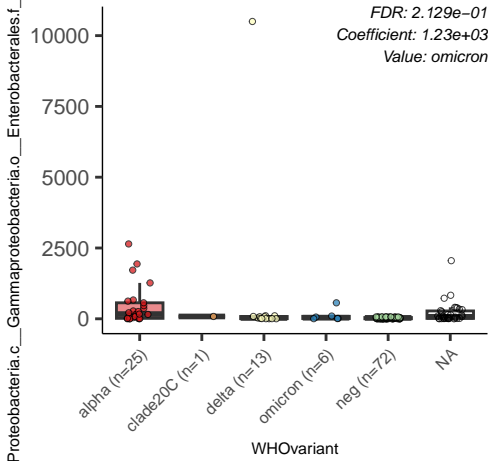

Gamma\_\_Gammaproteobacteria.o\_\_Enterobacterales.f\_\_Bruguierivoracace

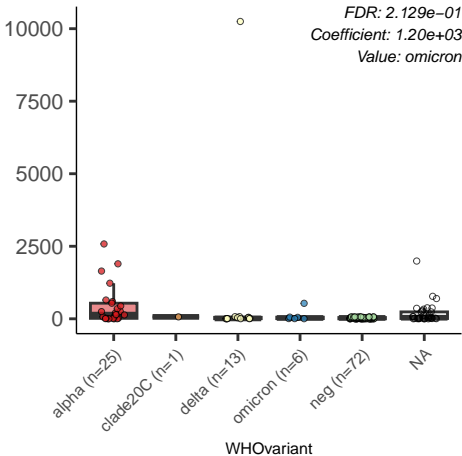

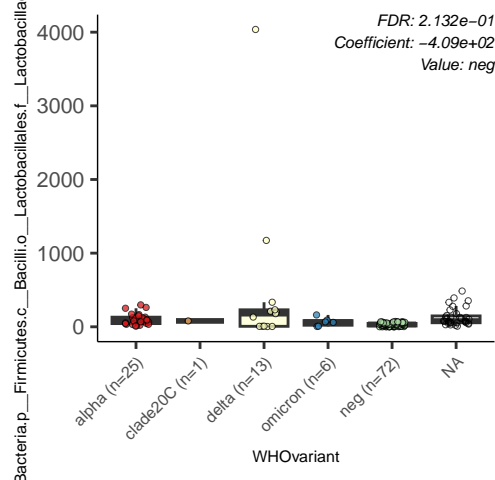

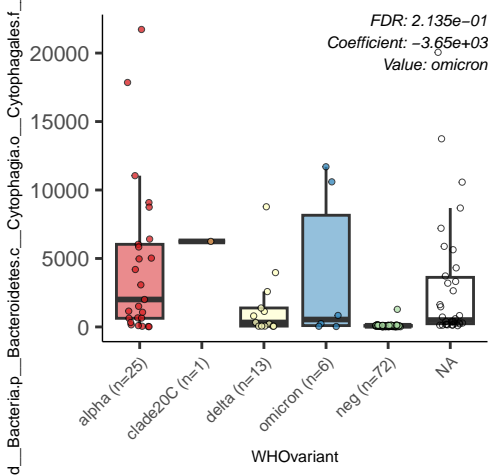

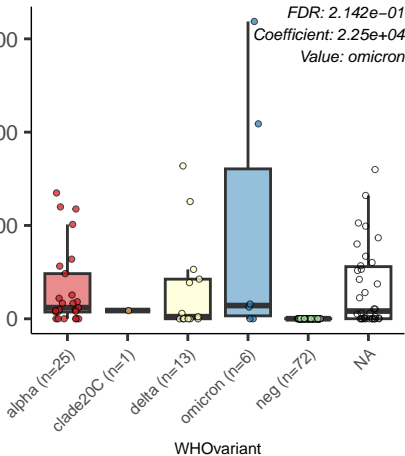



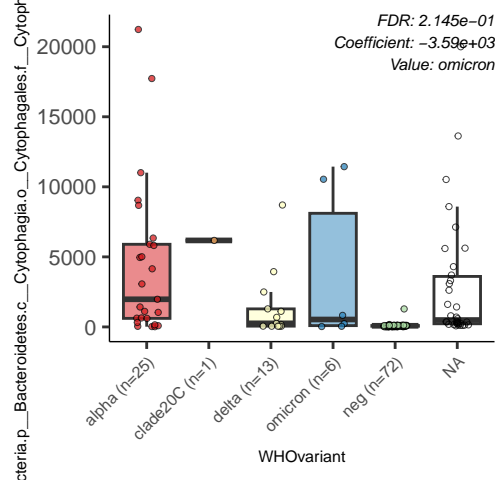

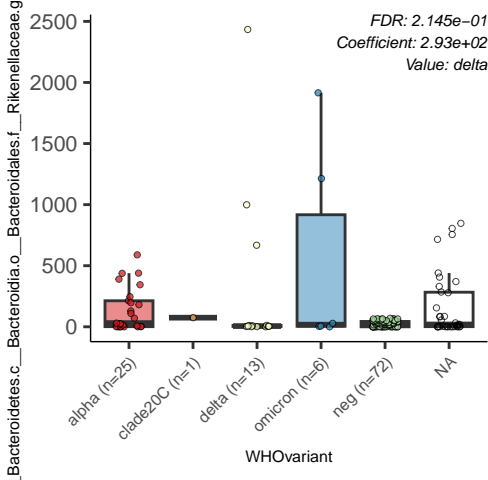

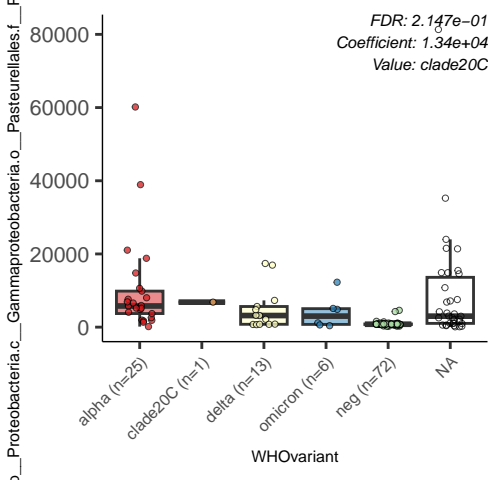

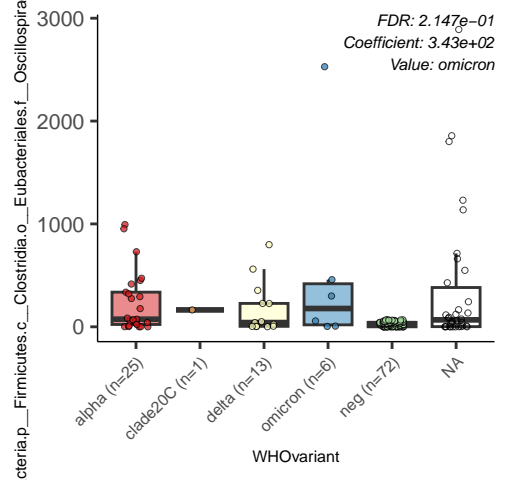

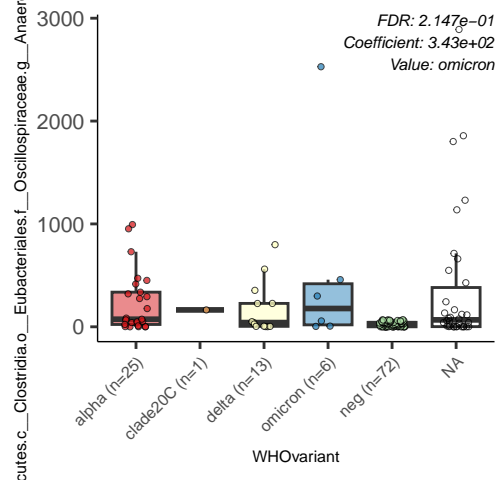

bacteria.c\_Actinomycetia.o\_Actinomycetales.f\_Actinomycetaceae

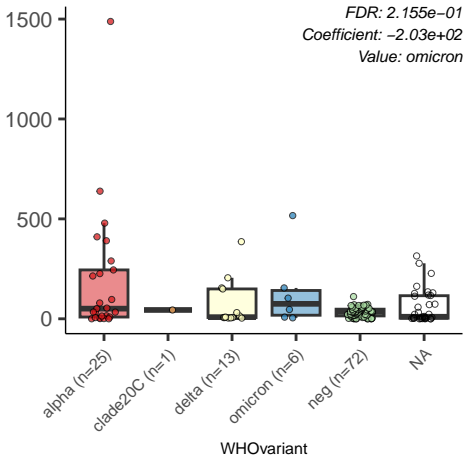

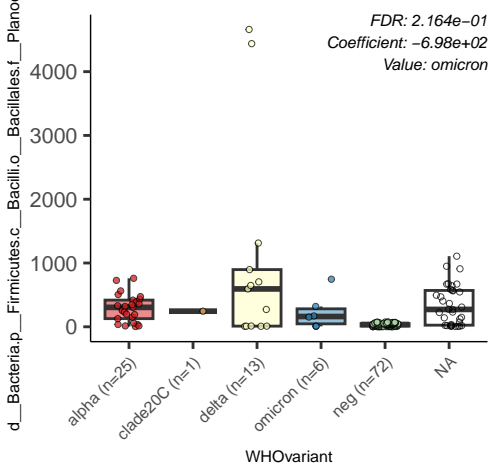

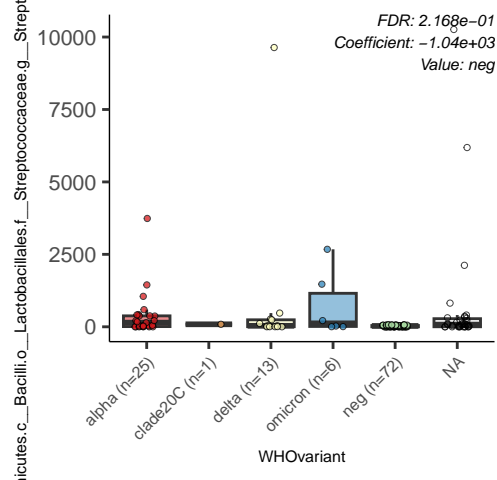



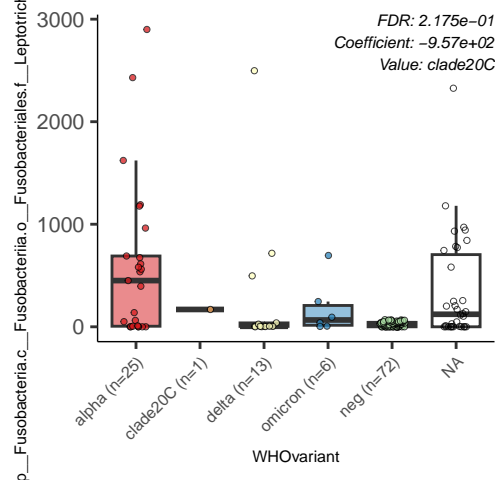

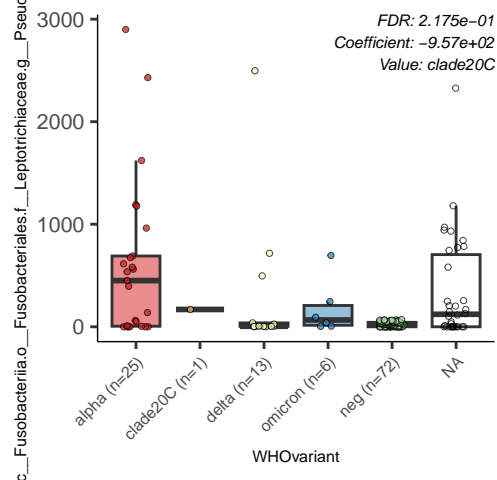

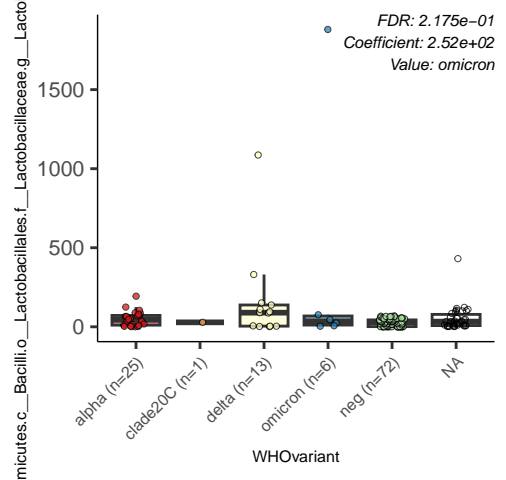

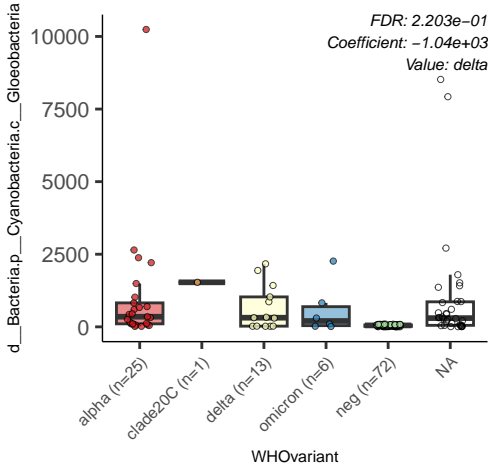

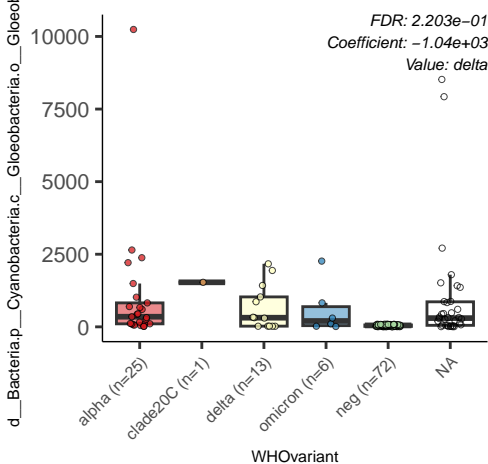

Bacteria.p\_\_Cyanobacteria.c\_\_Gloeobacteria.o\_\_Gloeobacterales.f.

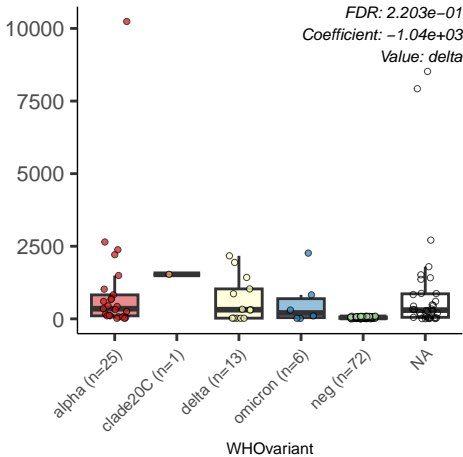

micutes.c\_\_Bacilli.o\_\_Lactobacillales.f\_\_Streptococcaceae.g\_\_Strep

FDR:  $2.203 \times 10^{-1}$   
Coefficient:  $9.15 \times 10^2$   
Value: delta

10000

5000

0

alpha (n=25)

clade20C (n=1)

delta (n=13)

omicron (n=6)

neg (n=72)

NA

WHOvariant

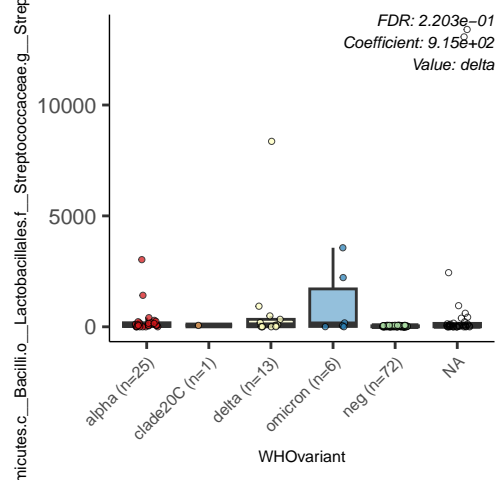

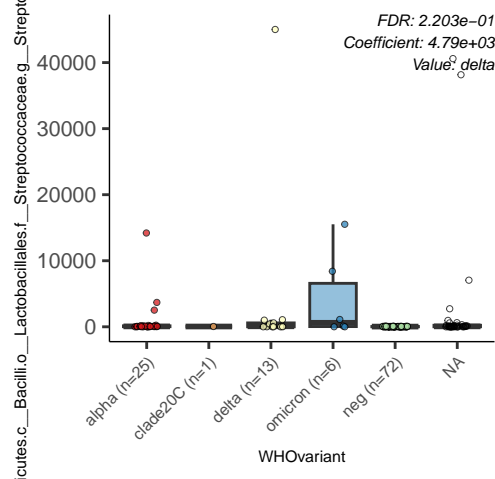



a.p\_\_Cyanobacteria.o\_\_Nostocales.f\_\_Calotrichaceae.g\_\_Calothrix

FDR: 2.210e-01  
Coefficient: -4.21e+03  
Value: delta

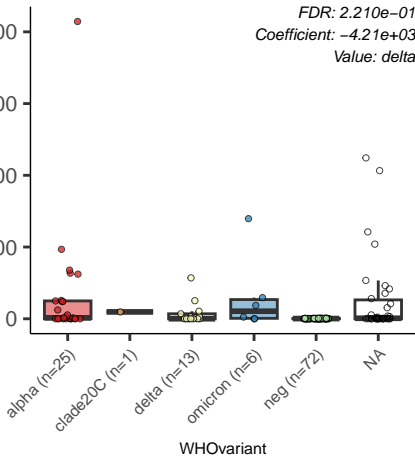

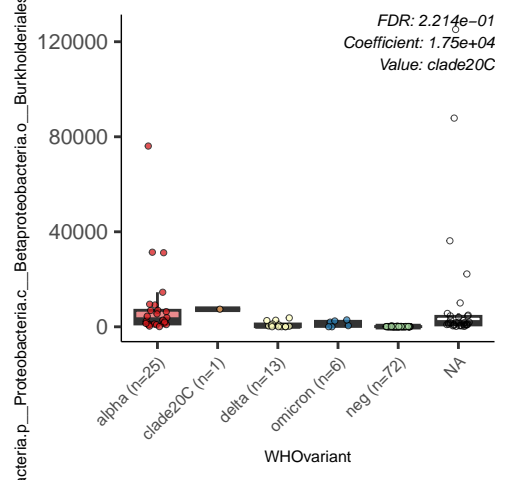

bidetes.c\_\_Bacteroidia.o\_\_Bacteroidales.f\_\_Tannerellaceae.g\_\_Para

FDR:  $2.218 \times 10^{-1}$   
Coefficient:  $2.56 \times 10^3$   
Value: clade20C

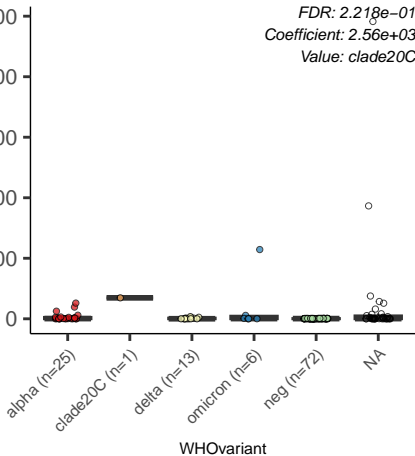

s.c\_Flavobacteriia.o\_Flavobacteriales.f\_Weeksellaceae.g\_\_Chr

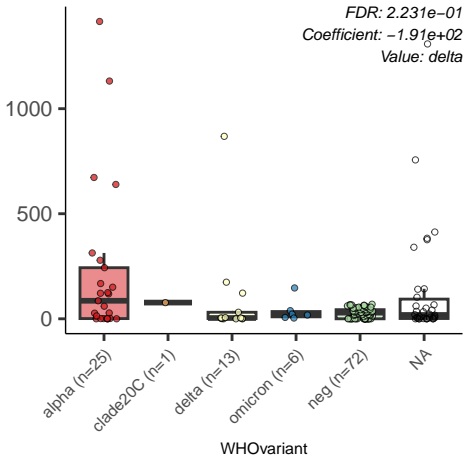

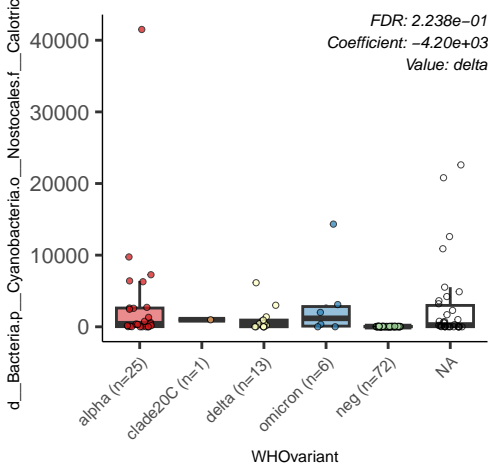

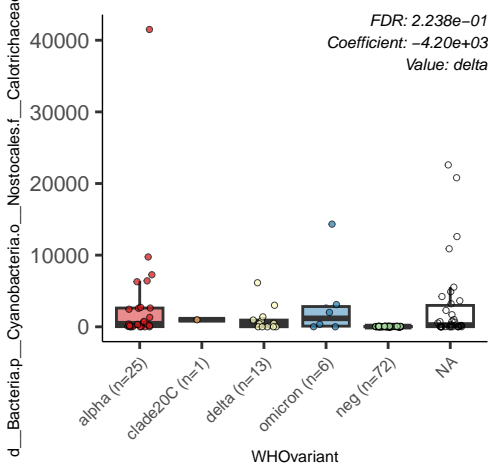

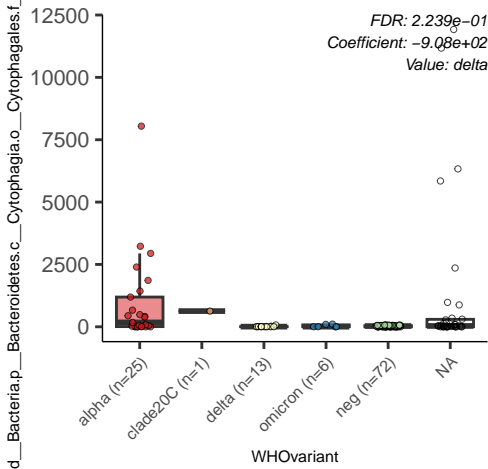

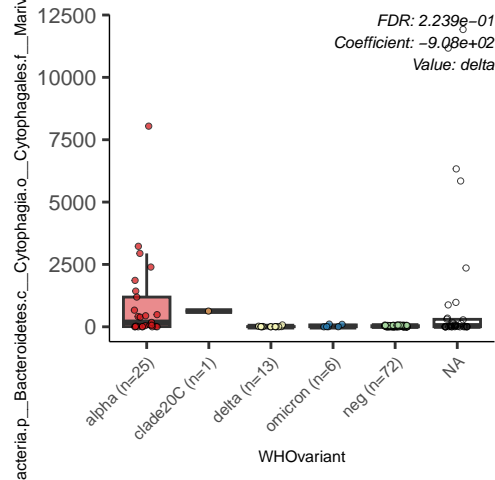



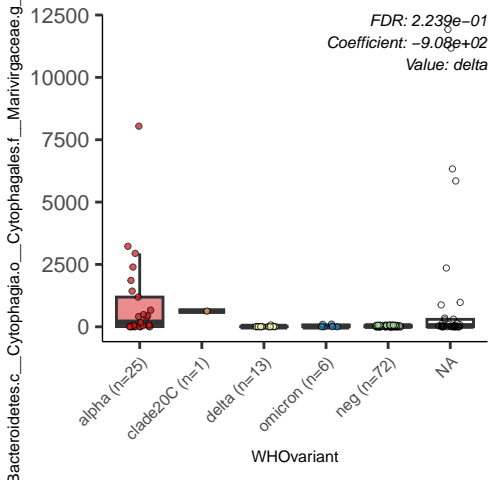

d\_\_Bacteria.c\_\_Candidatus.Babelliae

FDR:  $2.242e-01$   
Coefficient:  $-4.83e+01$   
Value: omicron

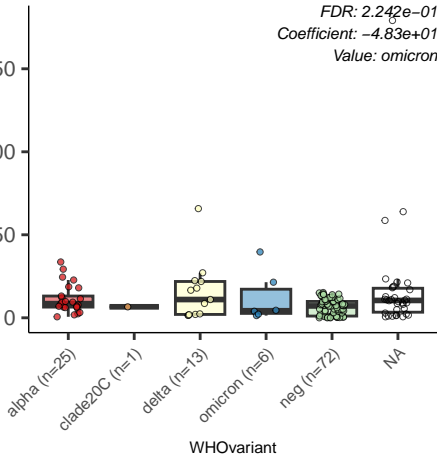

d\_\_Bacteria.c\_\_Candidatus.Babelliae.o\_\_Candidatus.Bab

FDR:  $2.242 \times 10^{-1}$   
Coefficient:  $-4.83 \times 10^1$   
Value: omicron

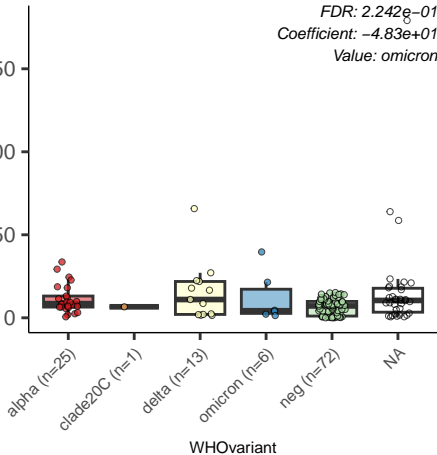

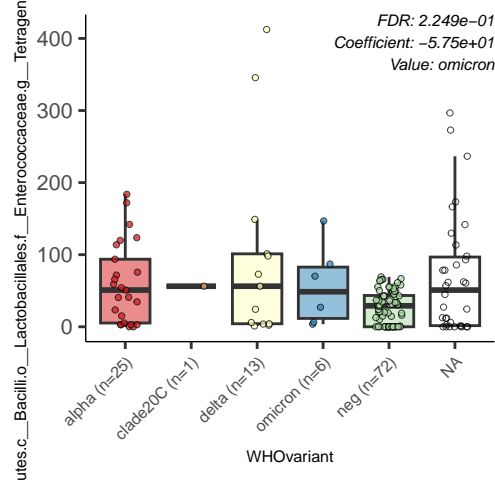

s.c\_Negativicutes.o\_Selenomonadales.f\_Selenomonadaceae.g

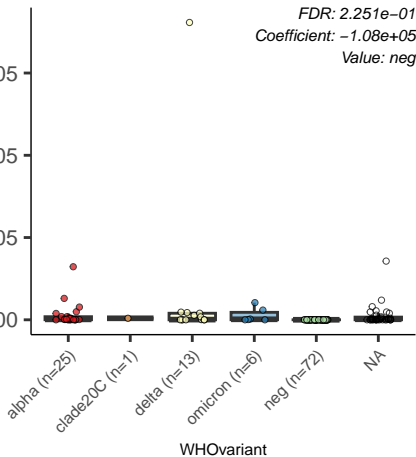

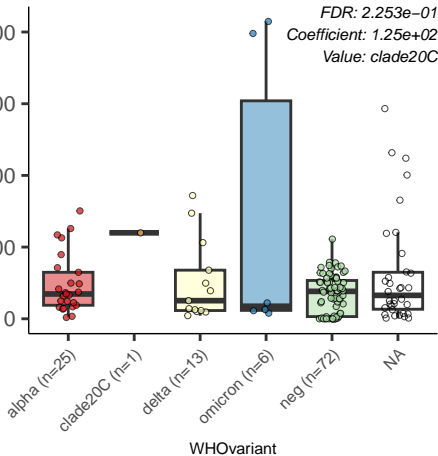

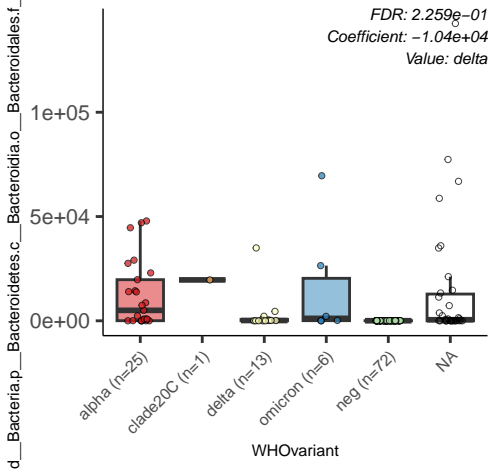

Actinomycetia.o\_\_Actinomycetales.f\_\_Actinomycetaceae.g

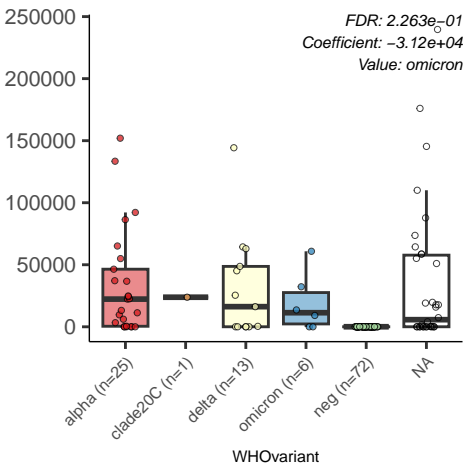

FDR: 2.263e-01

Coefficient:  $-3.12e+04$

Value: omicron



eroidetes.c\_\_Bacteroidia.o\_\_Bacteroidales.f\_\_Prevotellaceae.g\_\_P

FDR:  $2.263 \times 10^{-1}$   
Coefficient:  $-1.73 \times 10^5$   
Value: omicron

1e+06

5e+05

0e+00

alpha (n=25)

clade20C (n=1)

delta (n=13)

omicron (n=6)

neg (n=72)

NA

WHOvariant

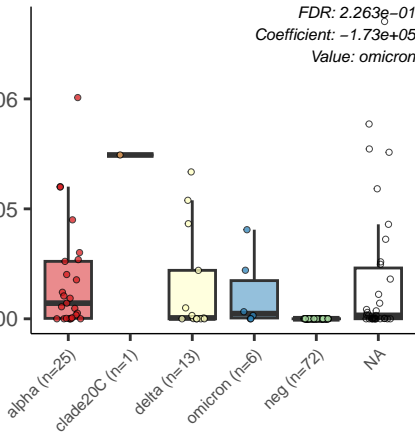

cteria.p\_\_Proteobacteria.c\_\_Gammaproteobacteria.o\_\_Enterobacte

FDR: 2.267e-01  
Coefficient: 1.26e+03  
Value: omicron

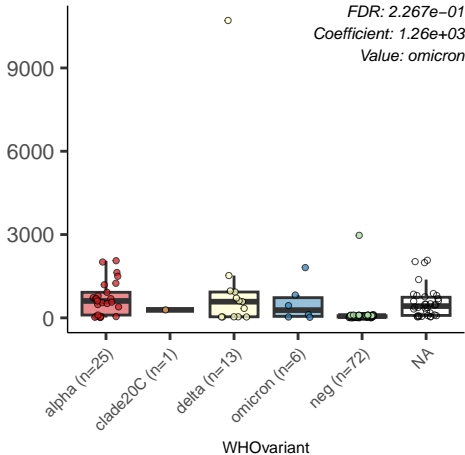

Flavobacteriia.o\_\_Flavobacteriales.f\_\_Flavobacteriaceae.g\_\_Capnocytophaga

FDR:  $2.267e-01$   
Coefficient:  $-2.87e+03$   
Value: *clade20C*

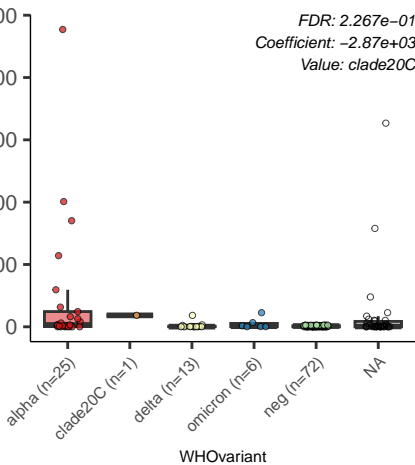

\_Bacteria.p\_\_Bacteroidetes.c\_\_Flavobacteriia.o\_\_Flavobacteriales.f

FDR: 2.268e-01  
Coefficient: -6.06e+04  
Value: neg

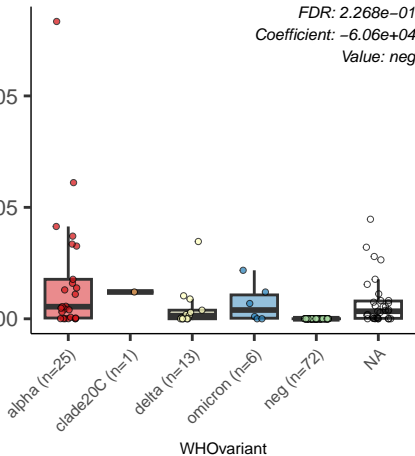

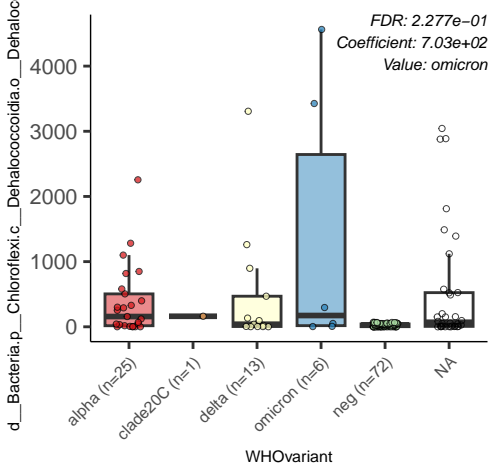

bacteria.p\_\_Chloroflexi.c\_\_Dehalococcoidia.o\_\_Dehalococcoidales.f\_\_

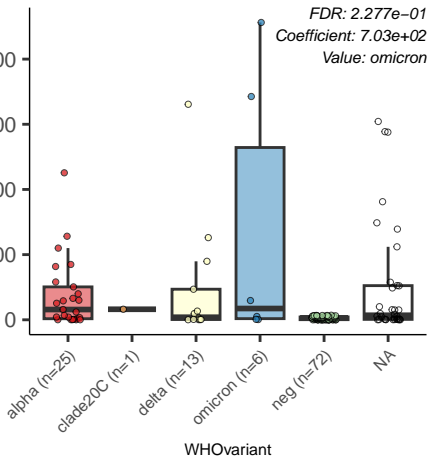

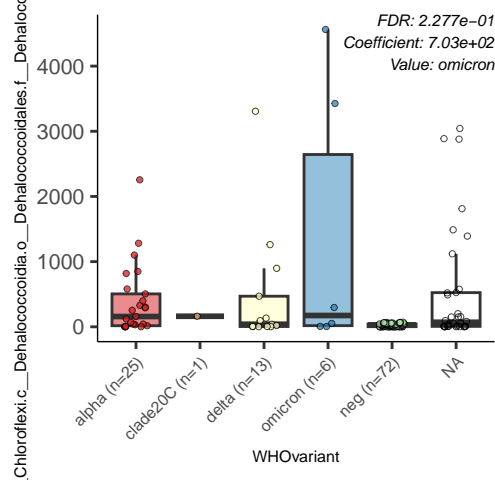

acteria.p\_Firmicutes.c\_Bacilli.o\_Lactobacillales.f\_Carnobacteri

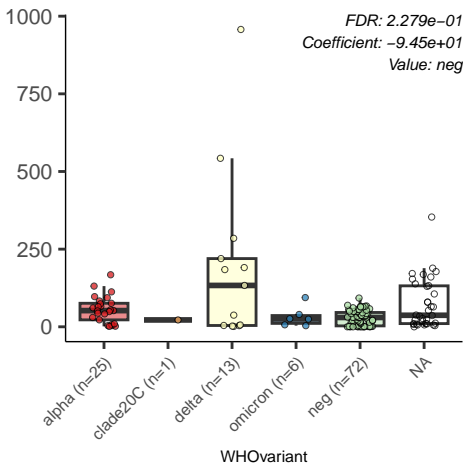



bacteria.c\_\_Fusobacteriia.o\_\_Fusobacteriales.f\_\_Leptotrichiaceae.g

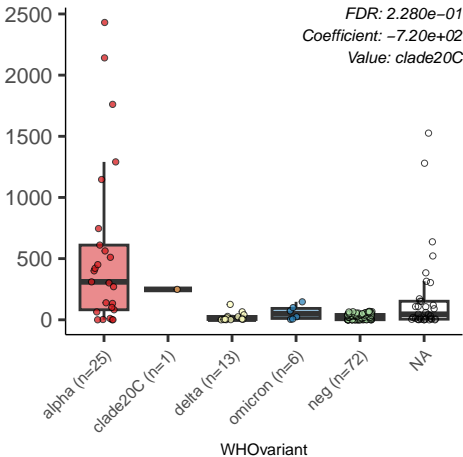

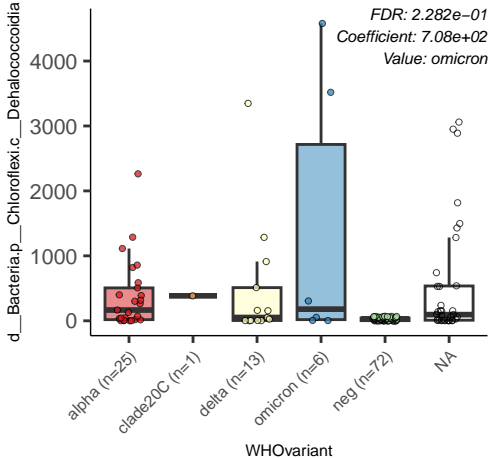

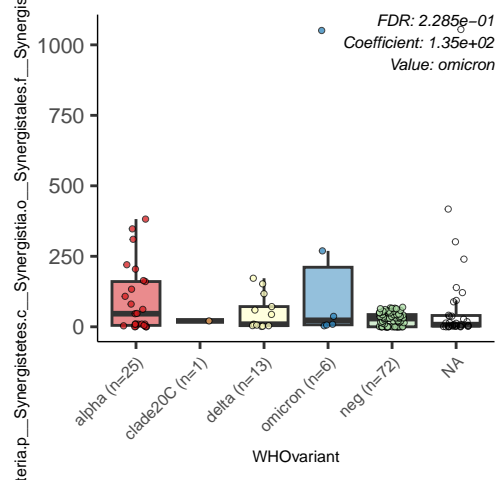

gisteres.c\_\_Synergistia.o\_\_Synergistales.f\_\_Synergistaceae.g\_\_Cl

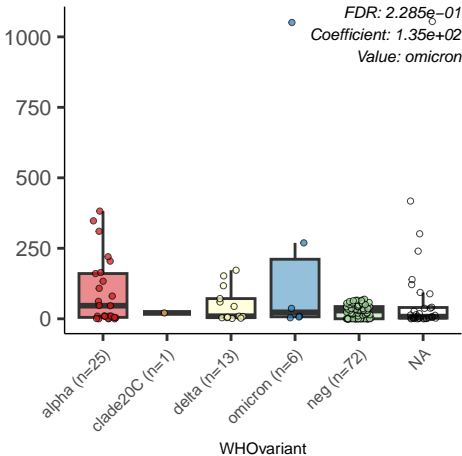

d\_Bacteria.p\_Firmicutes.c\_Bacilli.o\_Bacillales.f\_Paenit

FDR: 2.286e-01  
Coefficient: -1.42e+04  
Value: omicron

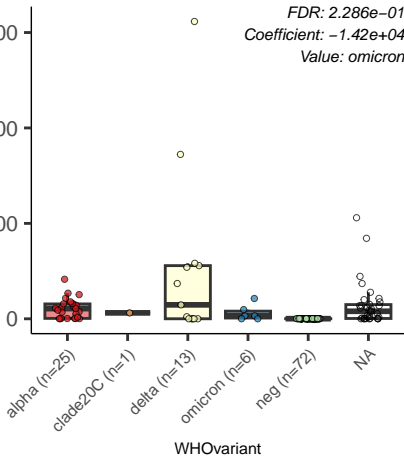

Actinobacteria.c\_\_Actinomycetia.o\_\_Micrococcales.f\_\_Micrococcaceae

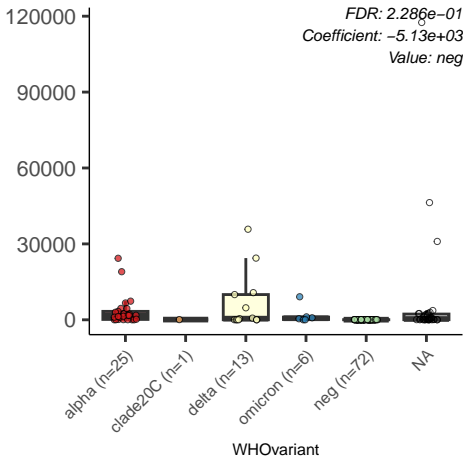

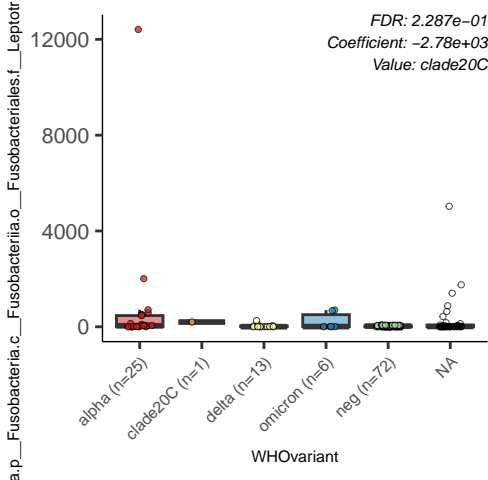

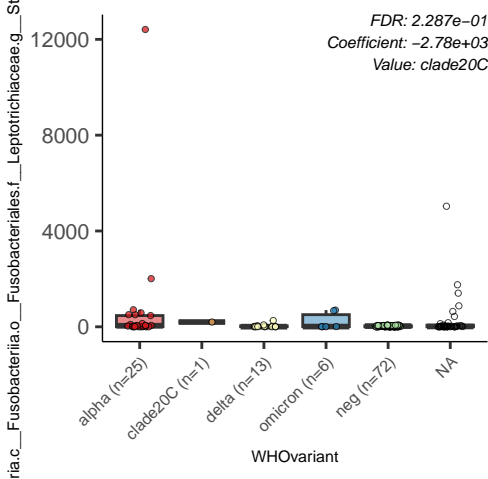





d\_\_Bacteria.p\_\_Firmicutes.c\_\_Bacilli.o\_\_Bacillales.g\_\_Exigu

FDR:  $2.291e-01$   
Coefficient:  $-2.46e+02$   
Value: omicron

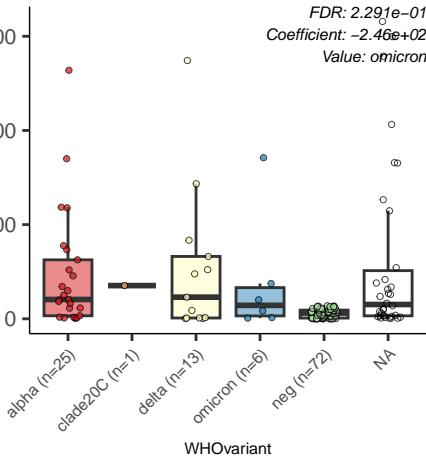

eria.p\_\_Firmicutes.c\_\_Clostridia.o\_\_Thermoanaerobacterales.f\_\_T

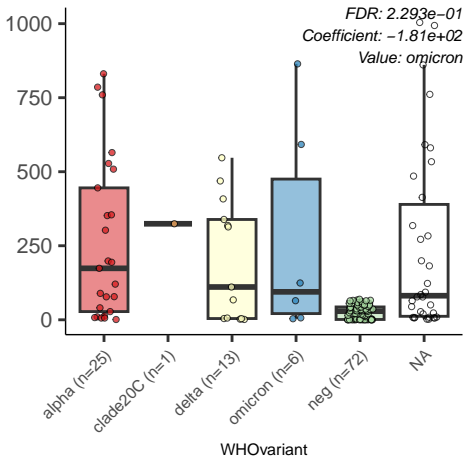

nicutes.c\_\_Bacilli.o\_\_Lactobacillales.f\_\_Streptococcaceae.g\_\_Strep

FDR:  $2.302 \times 10^{-1}$   
Coefficient:  $-6.49 \times 10^3$   
Value: clade20C

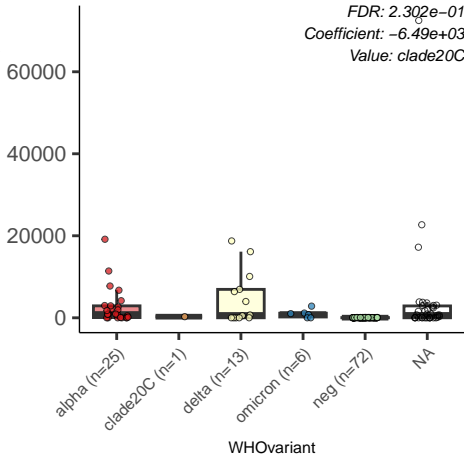

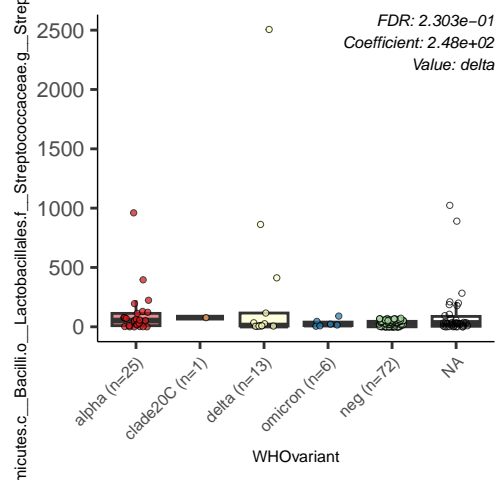

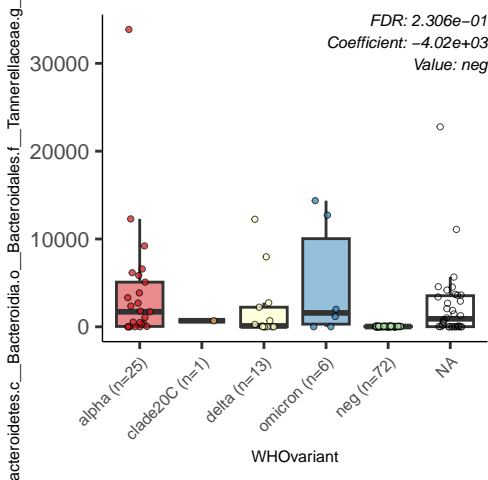

acteria.p\_Firmicutes.c\_Clostridia.o\_Eubacteriales.f\_Eubacteri

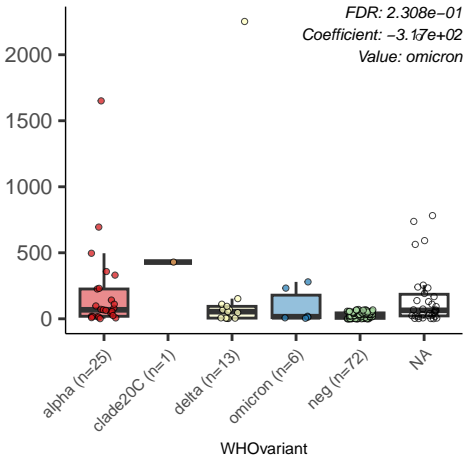

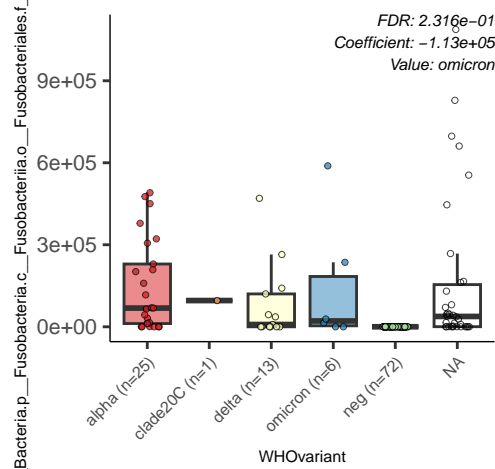



Bacteria.p\_Spirochaetes.c\_Spirochaetia.o\_Spirochaetales.f\_Bo

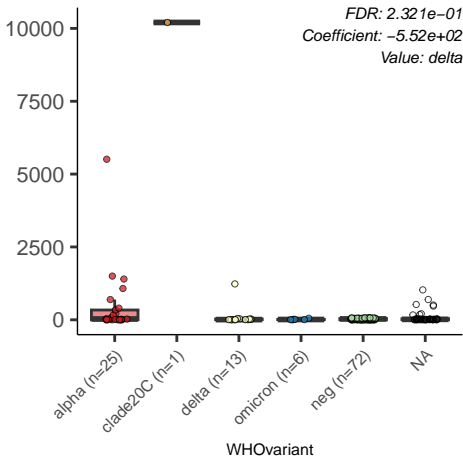

\_\_Epsilonproteobacteria.o\_\_Campylobacteriales.f\_\_Campylobacter

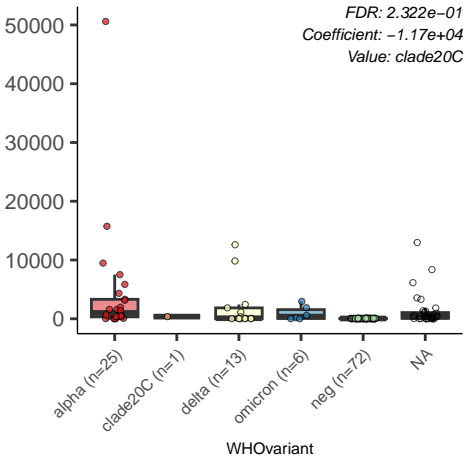



acteroidetes.c\_\_Flavobacteriia.o\_\_Flavobacteriales.f\_\_Flavobacteri

FDR:  $2.322e-01$   
Coefficient:  $1.92e+02$   
Value: clade20C

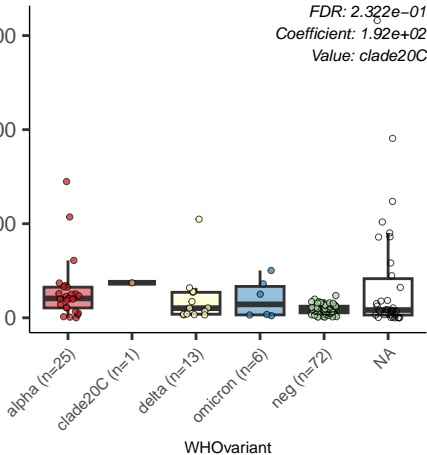

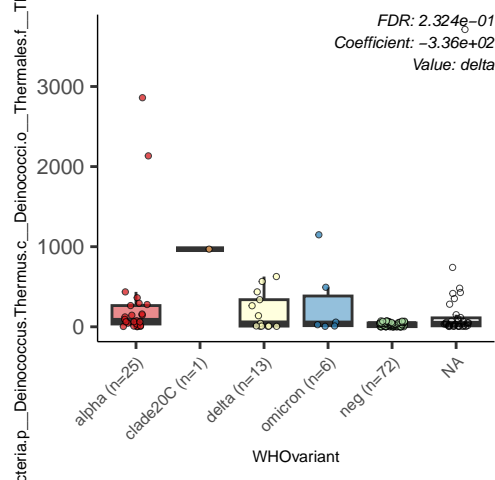

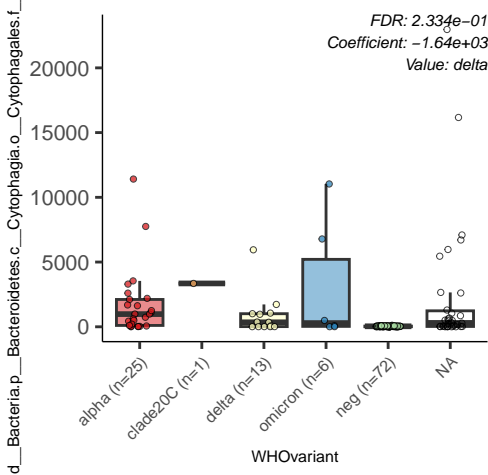

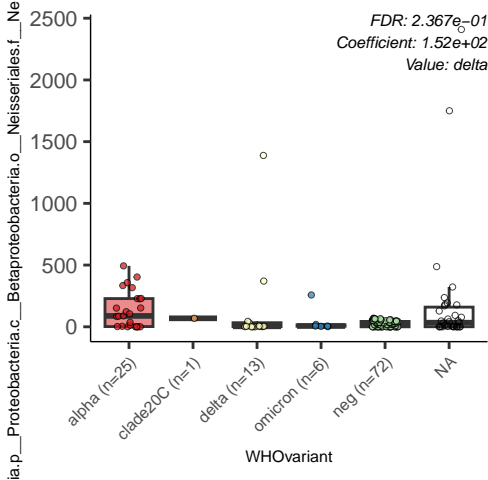

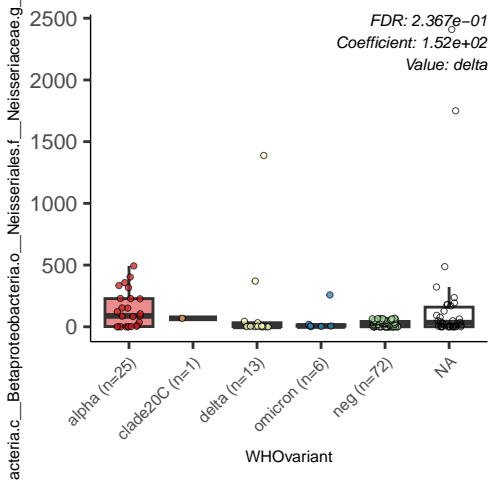



ria.p\_\_Proteobacteria.c\_\_Alphaproteobacteria.o\_\_Rickettsiales.f\_\_C

FDR: 2.368e-01  
Coefficient: -6.19e+01  
Value: omicron

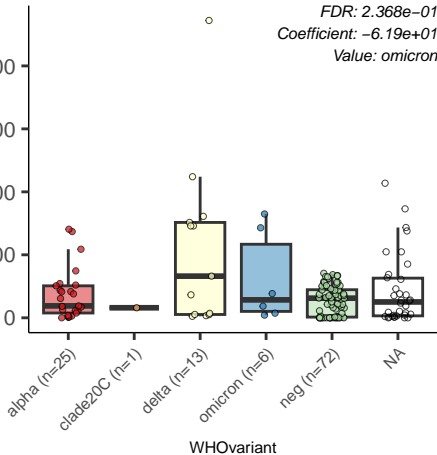

a.c\_\_Gammaproteobacteria.o\_\_Enterobacterales.f\_\_Enterobacteri

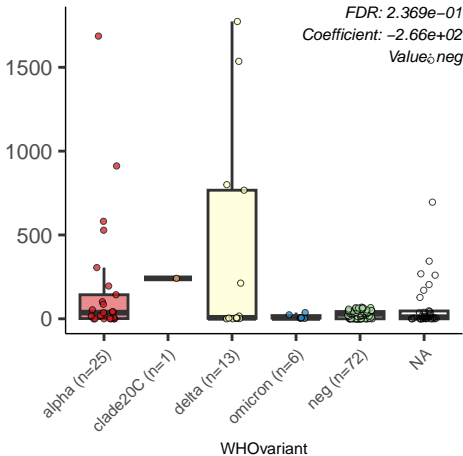

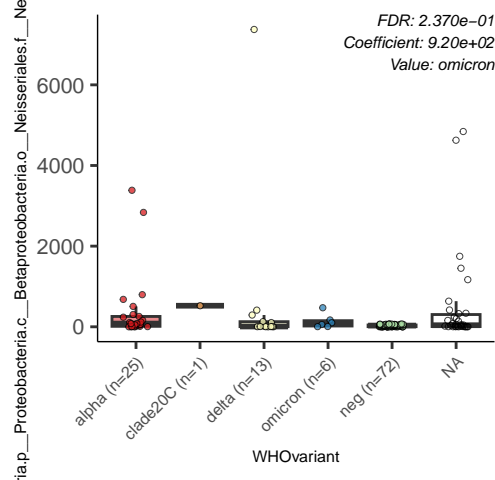

obacteria.c\_\_Betaproteobacteria.o\_\_Neisseriales.f\_\_Neisseriaceae.

FDR: 2.370e-01  
Coefficient: 9.20e+02  
Value: omicron

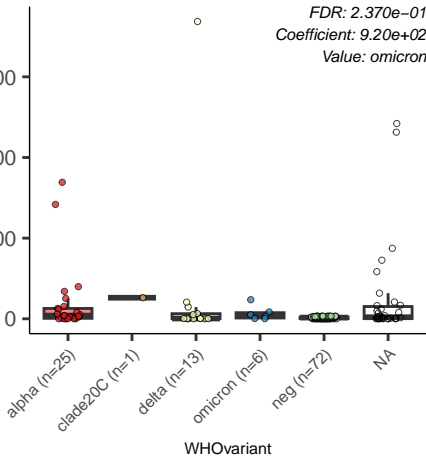

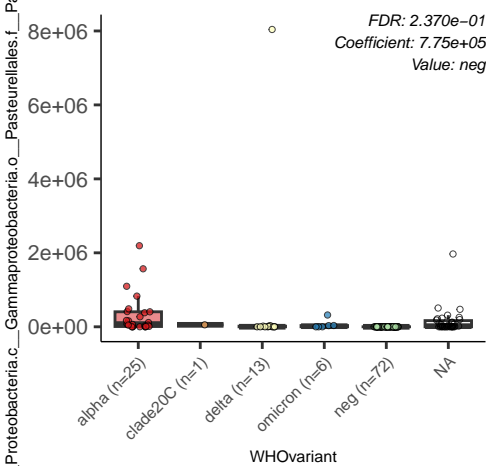

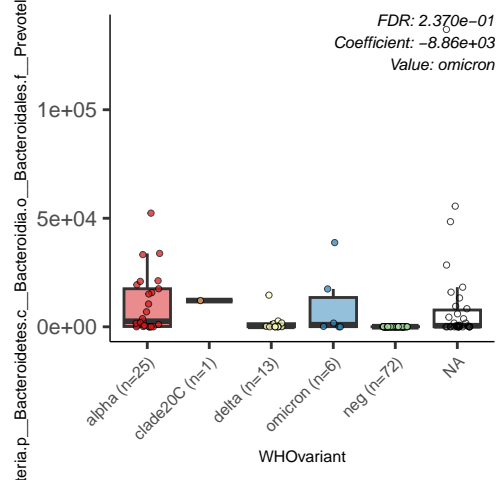

FDR:  $2.370e-01$   
Coefficient:  $-8.86e+03$   
Value: omicron

1e+05

5e+04

0e+00

alpha (n=25)

clade20C (n=1)

delta (n=13)

omicron (n=6)

neg (n=72)

NA

WHOvariant

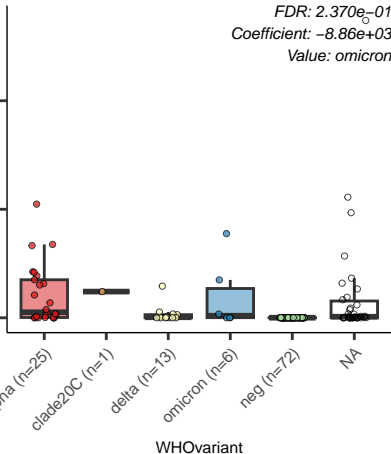

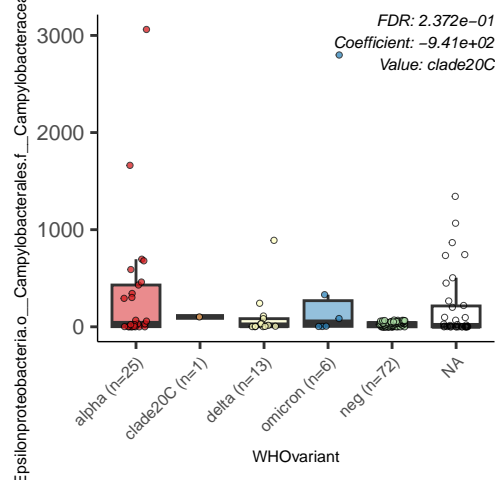



FDR: 2.382e-01  
Coefficient: 2.12e+05  
Value: omicron

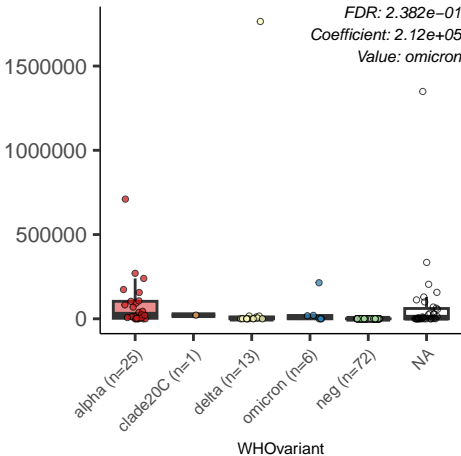

oteobacteria.c\_\_Betaproteobacteria.o\_\_Neisseriales.f\_\_Neisseriace

FDR:  $2.383e-01$   
Coefficient:  $-1.38e+04$   
Value: neg

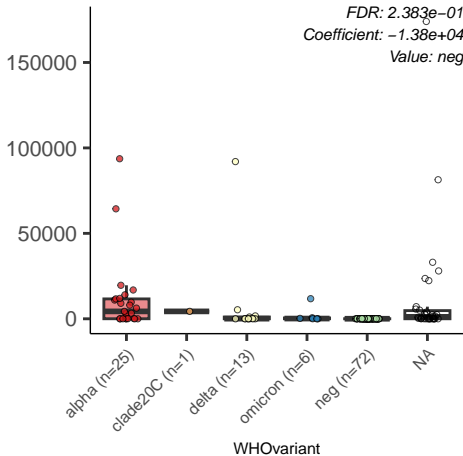

psilonproteobacteria.o\_\_Campylobacterales.f\_\_Campylobacteraceae

FDR: 2.388e-01  
Coefficient: -3.38e+03  
Value: neg

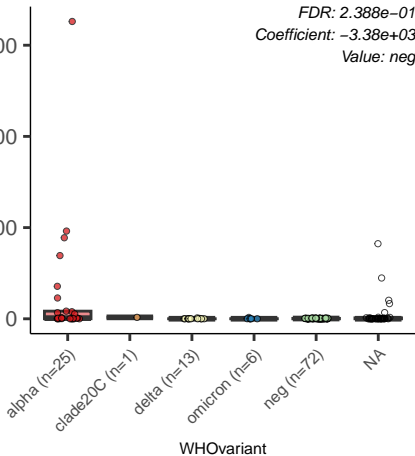

Value: omicron

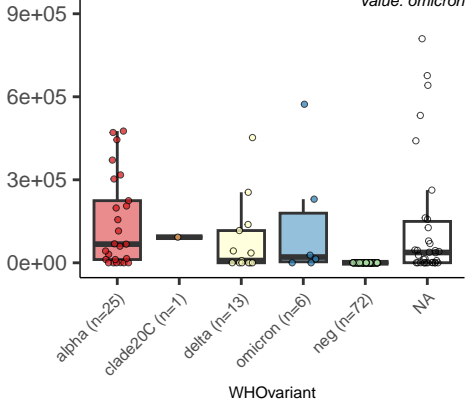

micutes.c\_\_Bacilli.o\_\_Lactobacillales.f\_\_Lactobacillaceae.g\_\_Lactila

FDR: 2.393e-01  
Coefficient: -1.03e+02  
Value: omicron

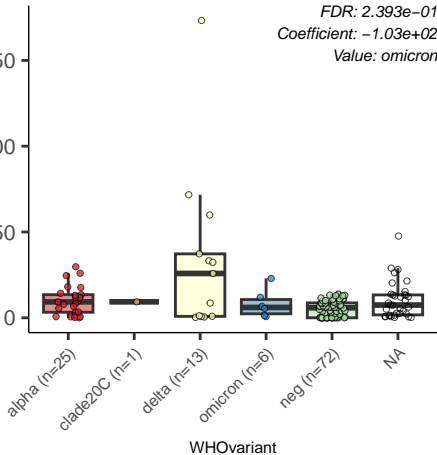

Cyanobacteria.c\_\_Gloeobacteria.o\_\_Gloeobacterales.f\_\_Gloeoba

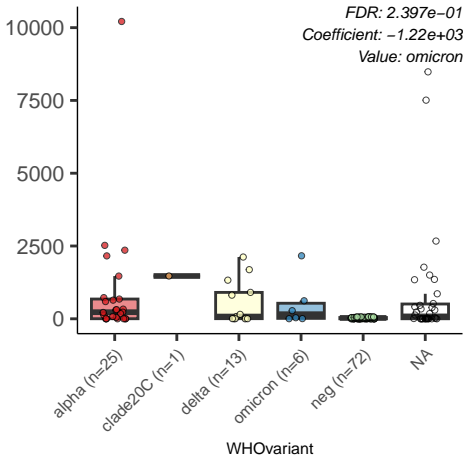

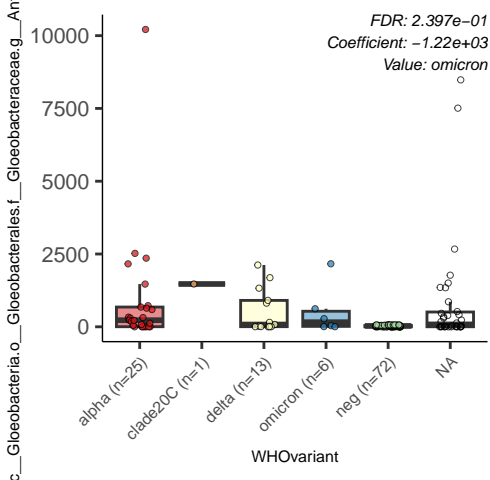

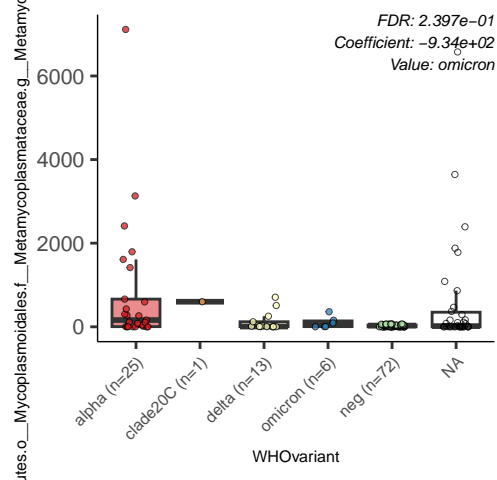



ia.p\_\_Acidobacteria.c\_\_Blastocatellia.g\_\_Chloracidobacterium.s\_\_C

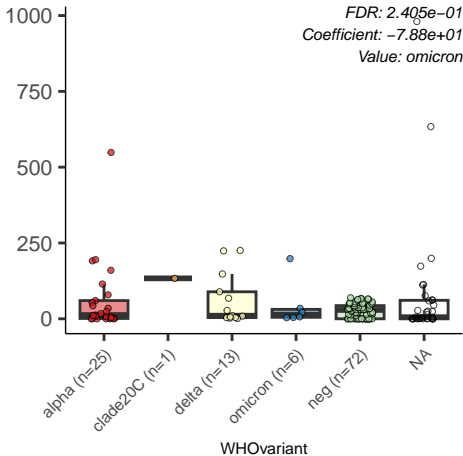

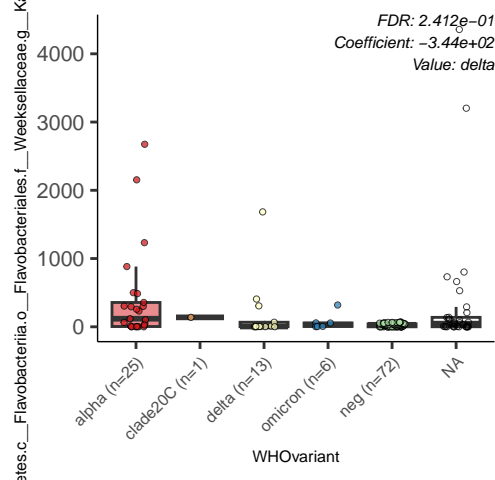

Bacteria.p\_Firmicutes.c\_Bacilli.o\_Bacillales.g\_Gemella.s

FDR: 2.426e-01  
Coefficient: -3.31e+03  
Value: neg

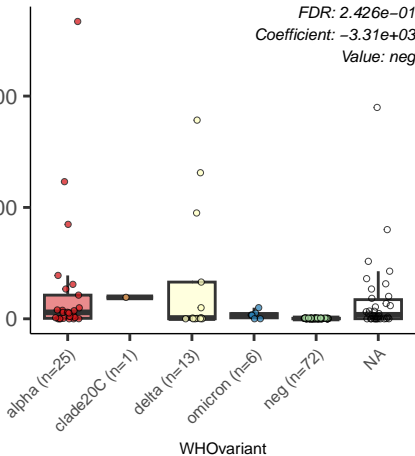

Firmicutes.c\_\_Bacilli.o\_\_Lactobacillales.f\_\_Lactobacillaceae.g\_\_Lac

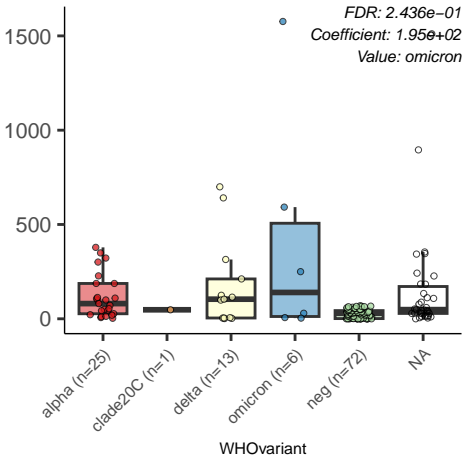

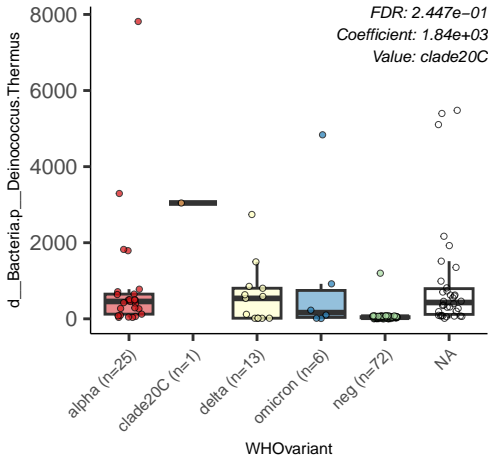

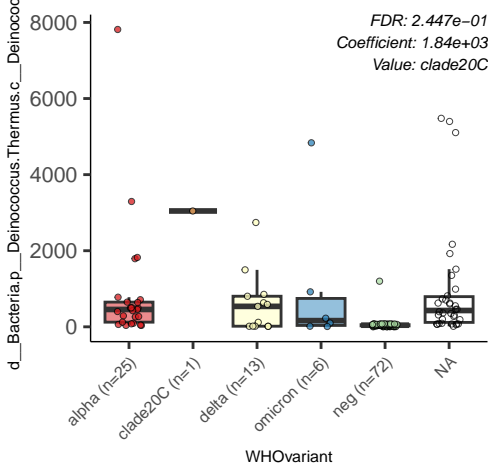

Bacteria.p\_Actinobacteria.c\_Actinomycetia.o\_Micrococcales.f

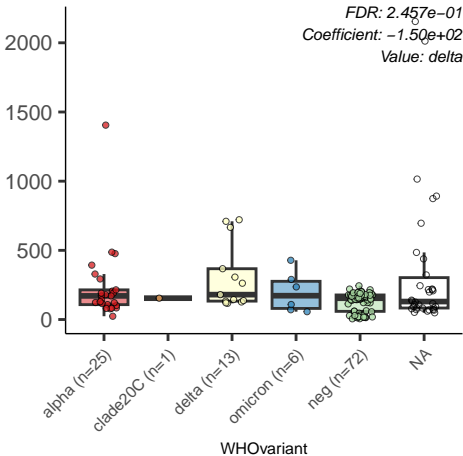

FDR:  $2.457e-01$   
Coefficient:  $-1.50e+02$   
Value: delta

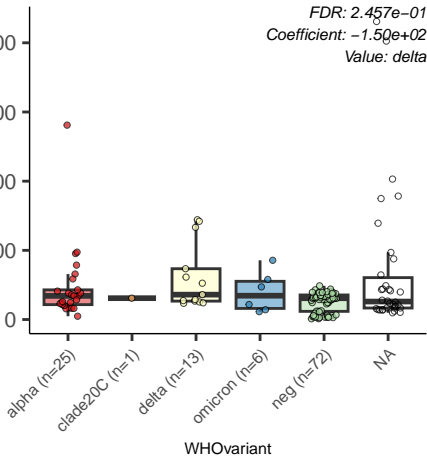



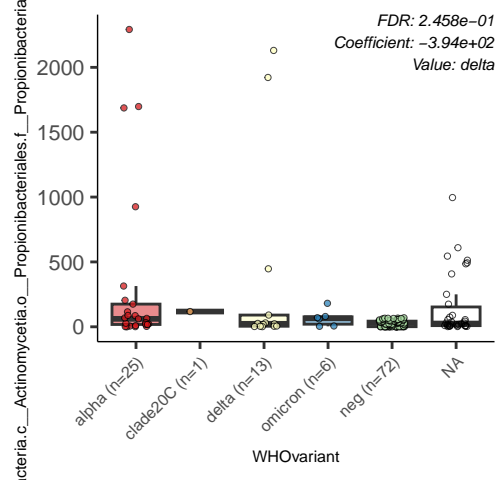

ria.p\_Actinobacteria.c\_Actinomycetia.o\_Corynebacteriales.f\_G

$FDR: 2.468e-01$   
 $Coefficient: -8.13e+01$   
 $Value: delta$

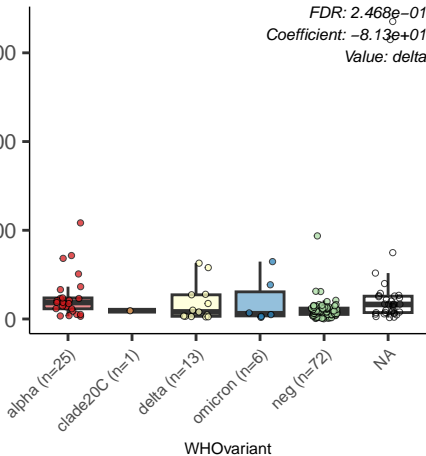

Actinobacteria.c\_\_Actinomycetia.o\_\_Pseudonocardiales.f\_\_Pseud

FDR:  $2.468e-01$   
Coefficient:  $-4.65e+02$   
Value: delta

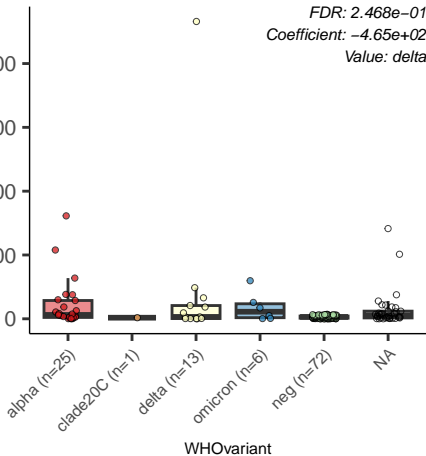

*FDR: 2.472e-01*  
*Coefficient: 4.13e+02*  
*Value: delta*

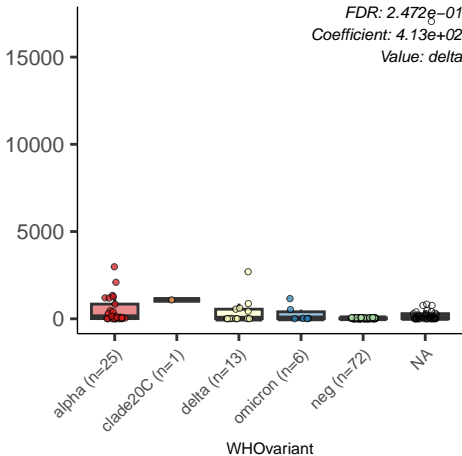

o\_Actinobacteria.c\_Actinomycetia.o\_Micrococcales.f\_Dermaba

FDR:  $2.475e-01$   
Coefficient:  $-9.78e+01$   
Value: omicron

1000

500

alpha (n=25)

clade20C (n=1)

delta (n=13)

omicron (n=6)

neg (n=72)

NA

WHOvariant

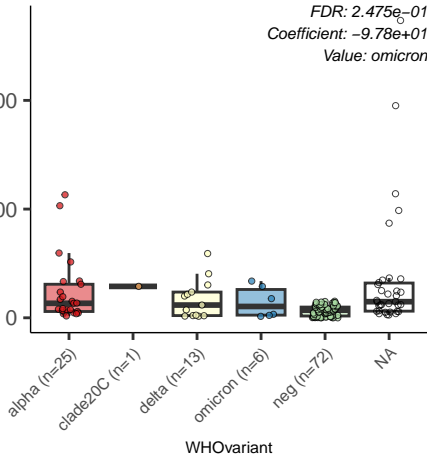

Firmicutes.c\_\_Negativicutes.o\_\_Acidaminococcales.f\_\_Acidaminino

FDR:  $2.475e-01$   
Coefficient:  $-3.50e+02$   
Value: omicron

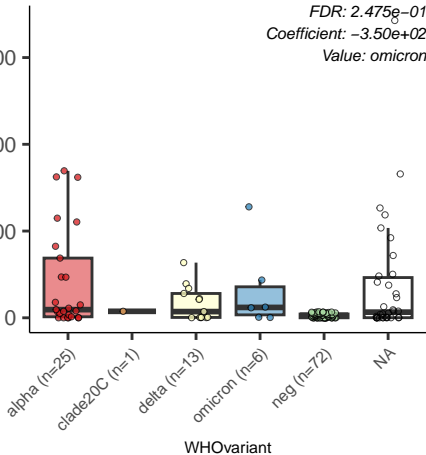

a.p\_\_Proteobacteria.c\_\_Gammaproteobacteria.o\_\_Enterobacterales

FDR: 2.480e-01  
Coefficient: 2.58e+02  
Value: omicron

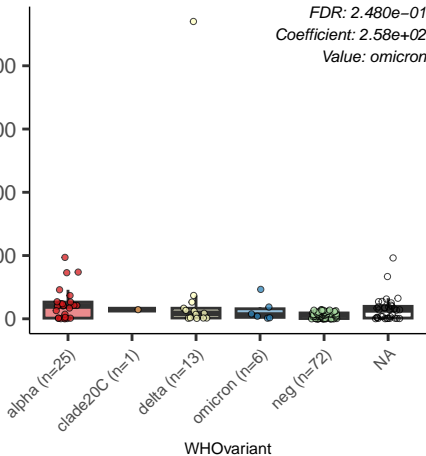

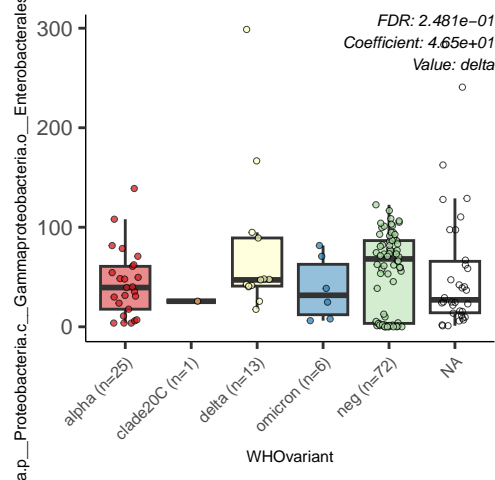



Bacteria.p\_Actinobacteria.c\_Actinomycetia.o\_Corynebacteriale

FDR:  $2.488e-01$   
Coefficient:  $-8.11e+01$   
Value: delta

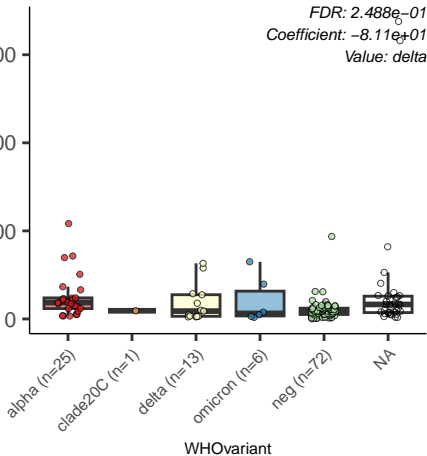

d\_\_Bacteria.p\_\_Firmicutes.c\_\_Negativicutes.o\_\_Acidaminob

FDR:  $2.491e-01$   
Coefficient:  $-1.34e+03$   
Value: clade20C

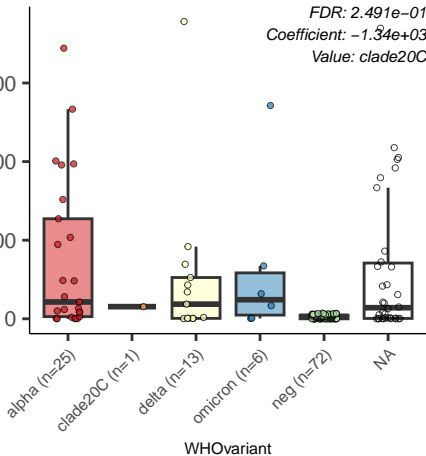

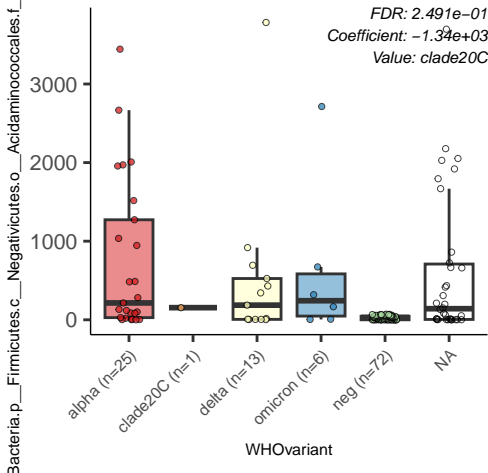

Supplement: s1 [file s1]
