# Supplementary material for: Metatranscriptome Analysis of Nasopharyngeal Swabs across the Varying Severity of COVID-19 Disease Demonstrated Unprecedented Species Diversity
Source: MDPI journal article supplement (doi:10.3390/microorganisms11071804), 2023-07-14

Firmicutes.c\_\_Bacilli.o\_\_Lactobacillales.f\_\_Streptococcaceae.g\_\_S

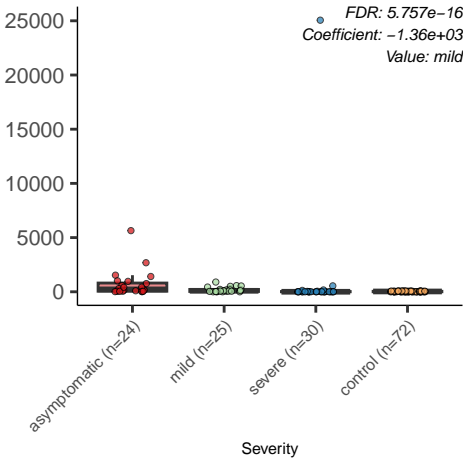

ia.p\_Actinobacteria.c\_Actinomycetia.o\_Actinomycetales.f\_Actin

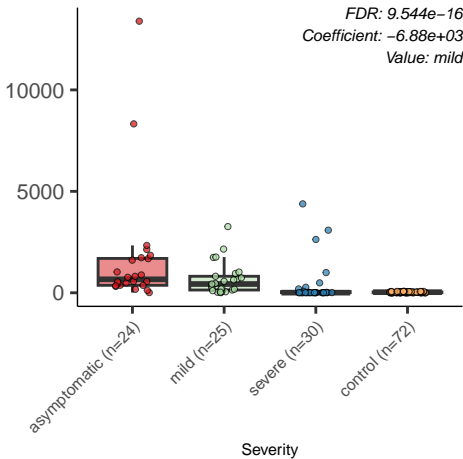

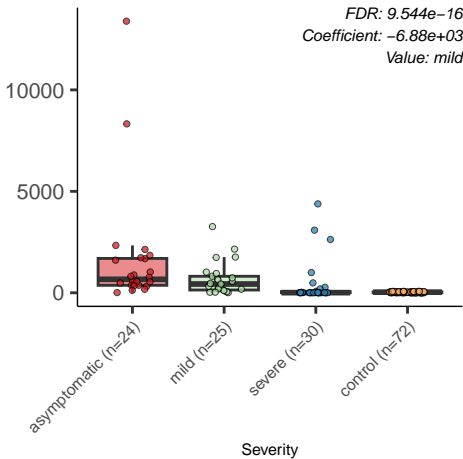

bacteria.p\_\_Firmicutes.c\_\_Clostridia.o\_\_Eubacteriales.f\_\_Oscillospira

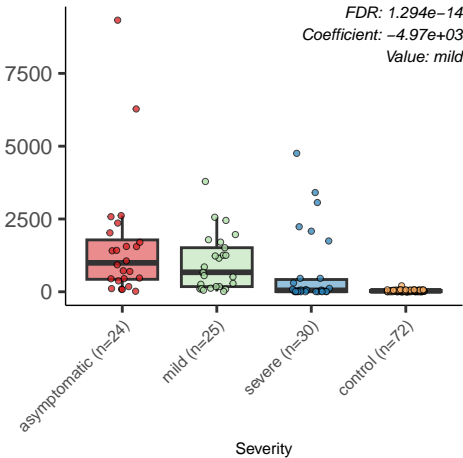



eria.p\_Actinobacteria.c\_Actinomycetia.o\_Corynebacteriales.f\_N

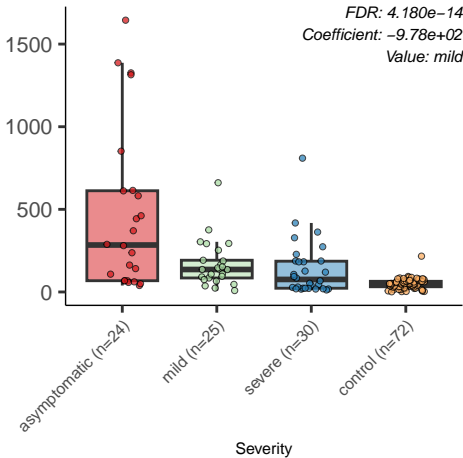

d\_Bacteria.p\_Firmicutes.c\_Clostridia.o\_Halanae

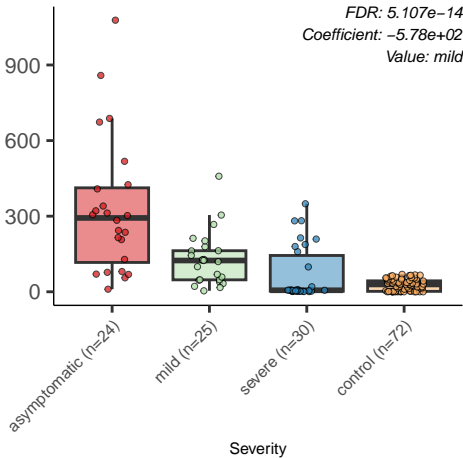

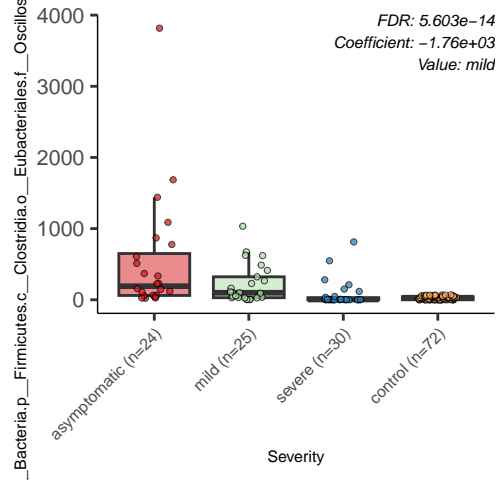

eria.p\_Firmicutes.c\_Clostridia.o\_Eubacteriales.f\_Lachnospiraceae

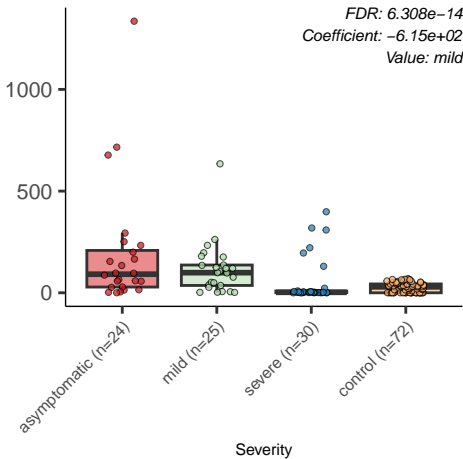

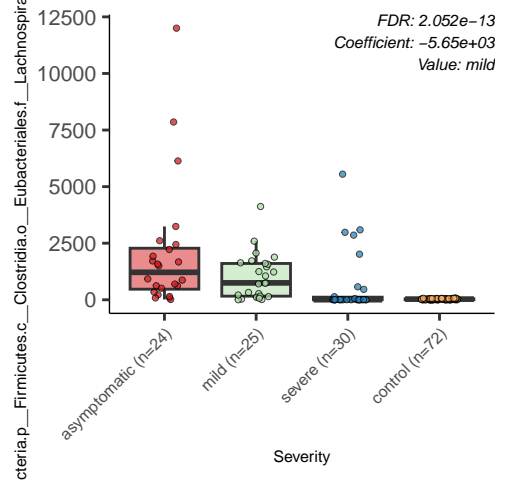

\_Bacteria.p\_\_Proteobacteria.c\_\_Alphaproteobacteria.o\_\_Hyphomicrobia

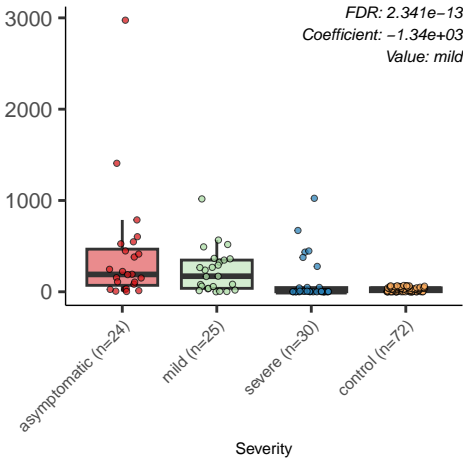

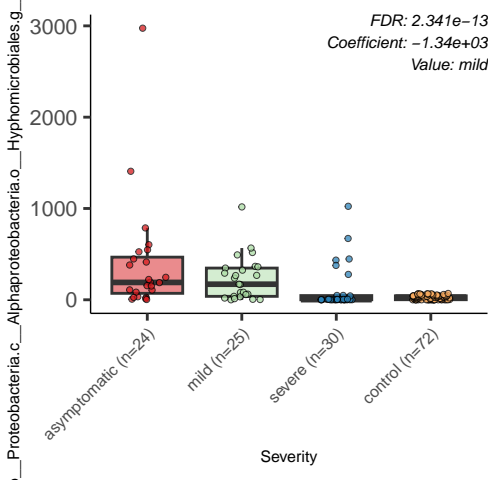

Bacteria.p\_Firmicutes.c\_Clostridia.o\_Eubacteriales.f\_Lachno

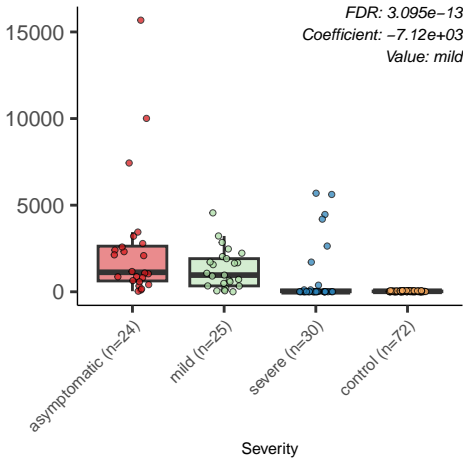



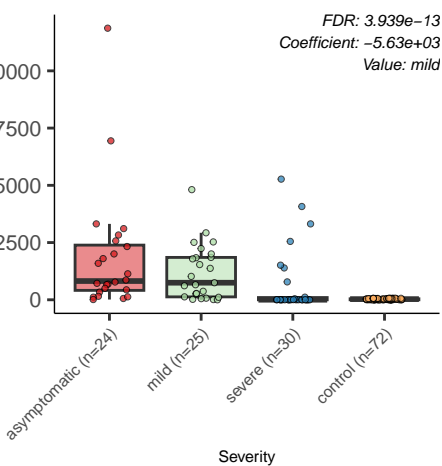

es.c\_\_Clostridia.o\_\_Eubacteriales.f\_\_Lachnospiraceae.g\_\_Pseudob

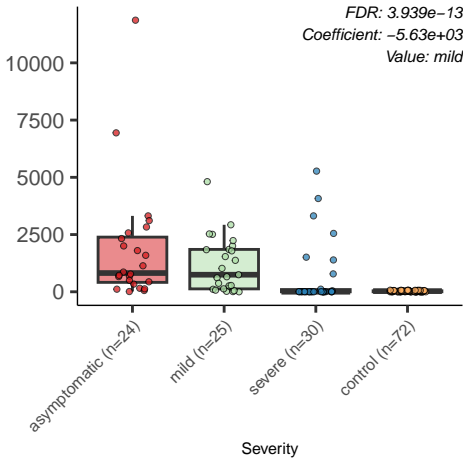

Bacteria.p\_\_Firmicutes.c\_\_Clostridia.o\_\_Eubacteriales.f\_\_Lachnosp

FDR:  $7.104e-13$   
Coefficient:  $-2.03e+03$   
Value: mild

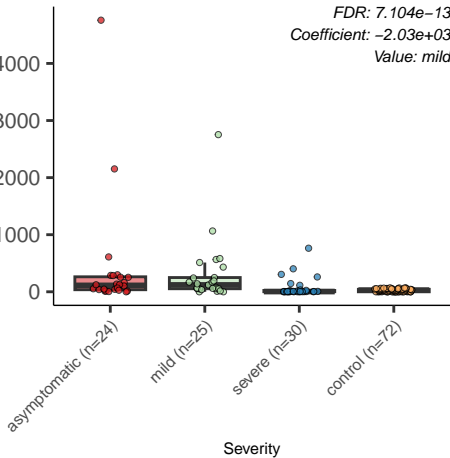

Firmicutes.c\_\_Clostridia.o\_\_Eubacteriales.f\_\_Lachnospiraceae.g

*FDR: 7.733e-13*  
*Coefficient: -2.03e+03*  
*Value: mild*

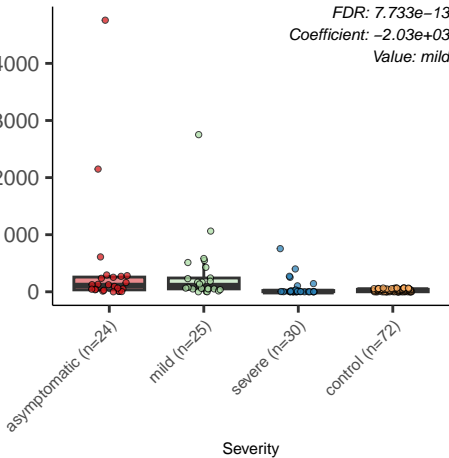

Firmicutes.c\_\_Clostridia.o\_\_Eubacteriales.f\_\_Lachnospiraceae.g

FDR:  $7.769 \times 10^{-13}$   
Coefficient:  $-1.56 \times 10^3$   
Value: mild

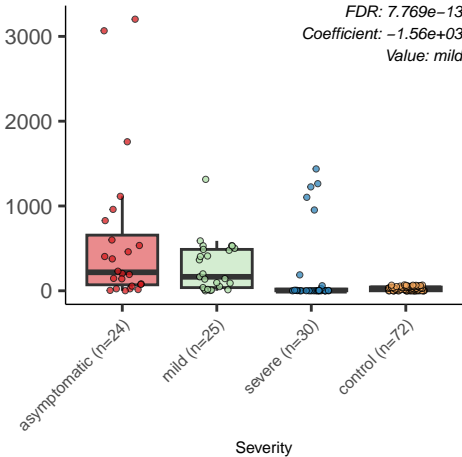

s.c\_\_Clostridia.o\_\_Eubacteriales.f\_\_Lachnospiraceae.g\_\_Lachnoclo

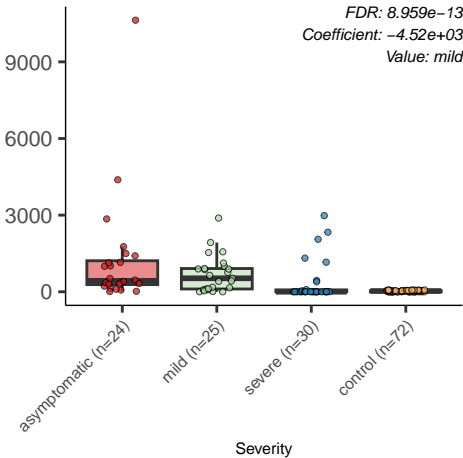

d\_Bacteria.p\_\_Firmicutes.c\_\_Clostridia.o\_\_Halanaerobiales.f

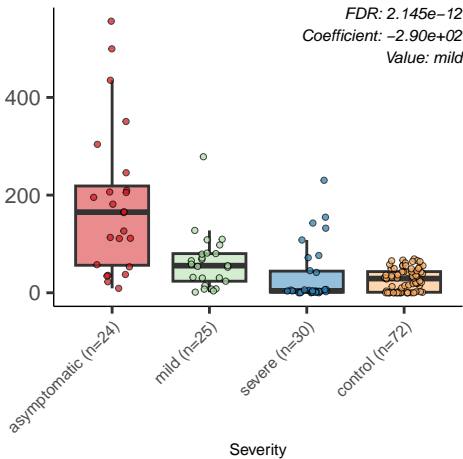

a.p\_Firmicutes.c\_Clostridia.o\_Eubacteriales.f\_Lachnospiraceae

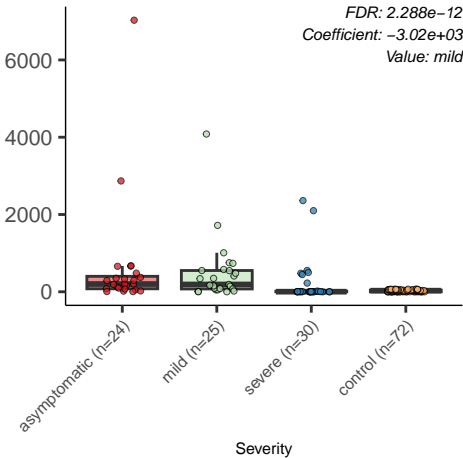



Firmicutes.c\_\_Clostridia.o\_\_Eubacteriales.f\_\_Lachnospiraceae.g

FDR:  $3.140 \times 10^{-12}$   
Coefficient:  $-4.66 \times 10^3$   
Value: mild

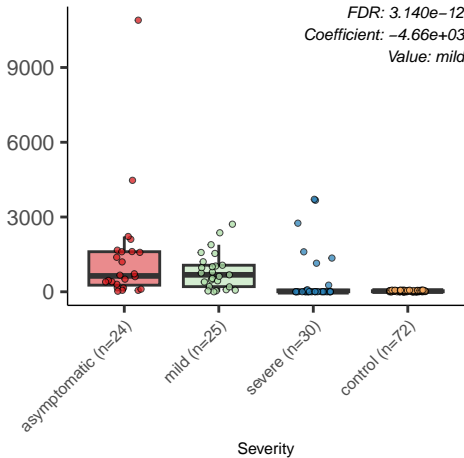

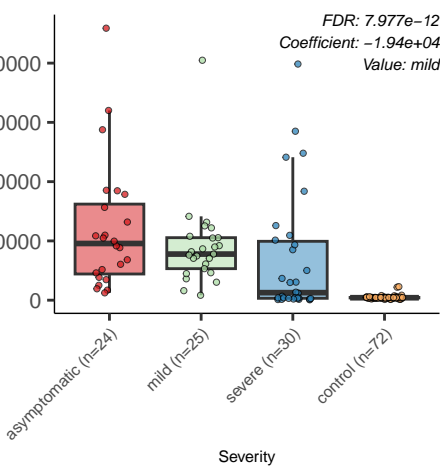

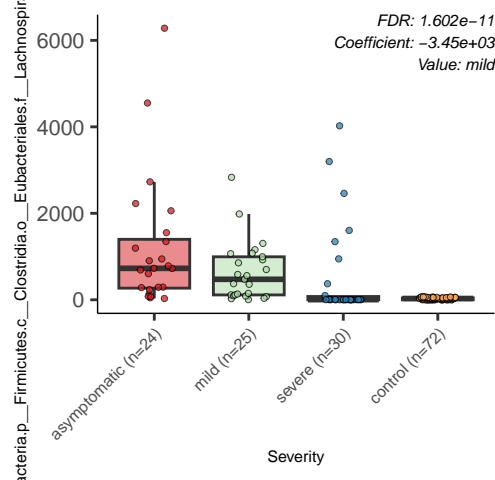

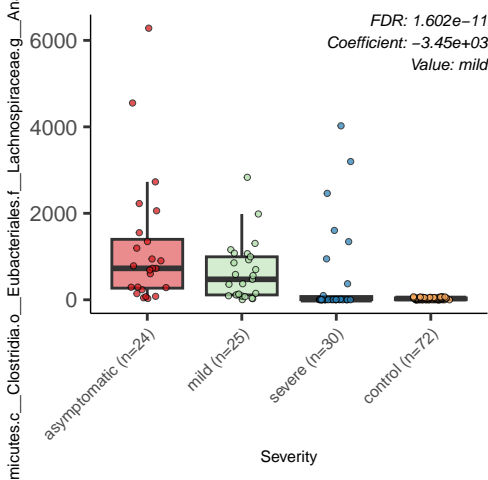

cutes.c\_\_Clostridia.o\_\_Eubacteriales.f\_\_Oscillospiraceae.g\_\_Faeca

*FDR: 2.363e-11*  
*Coefficient: -9.97e+02*  
*Value: mild*

2000

1000

0

asymptomatic (n=24)

mild (n=25)

severe (n=30)

control (n=72)

Severity

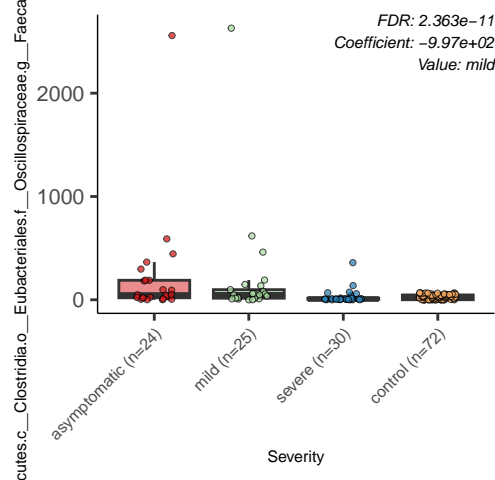

Bacteria.p\_Firmicutes.c\_Clostridia.o\_Eubacteriales.f\_Lachno

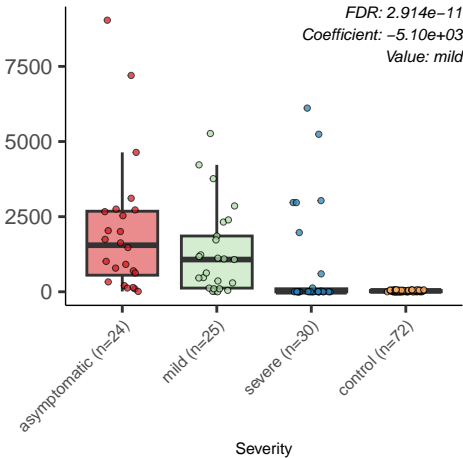

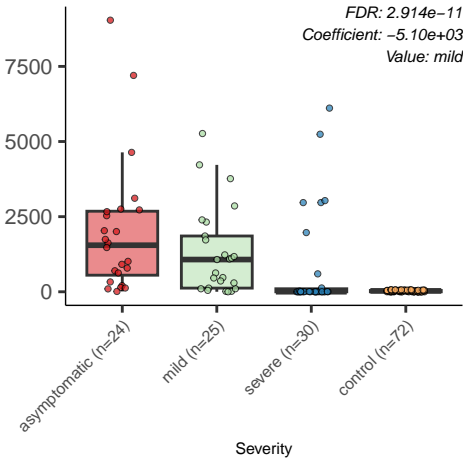

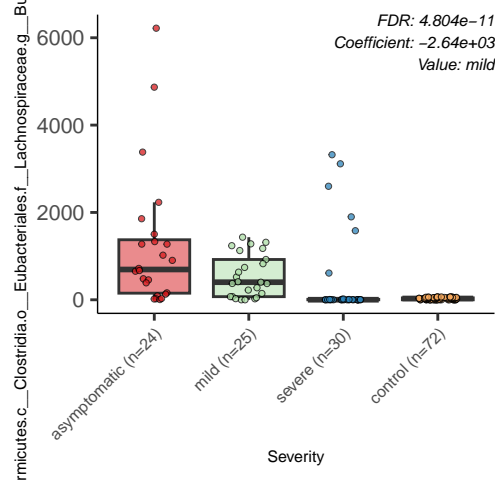



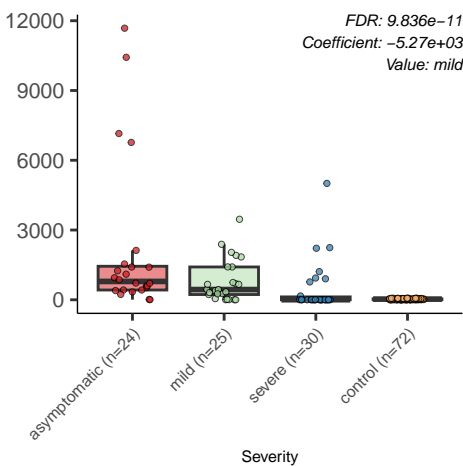

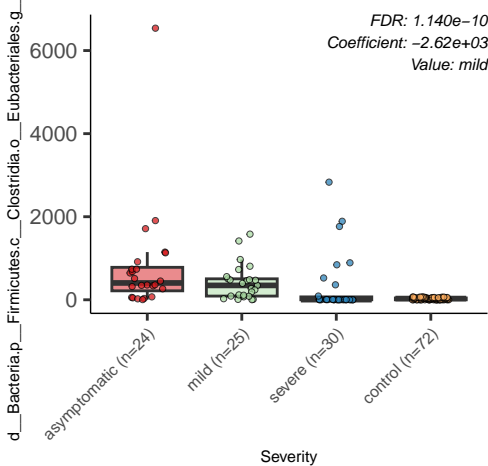

ria.p\_\_Firmicutes.c\_\_Clostridia.o\_\_Eubacteriales.g\_\_Massilistercora

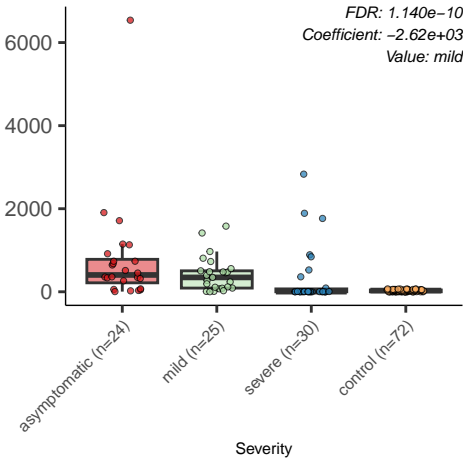

nicutes.c\_\_Bacilli.o\_\_Lactobacillales.f\_\_Streptococcaceae.g\_\_Strep

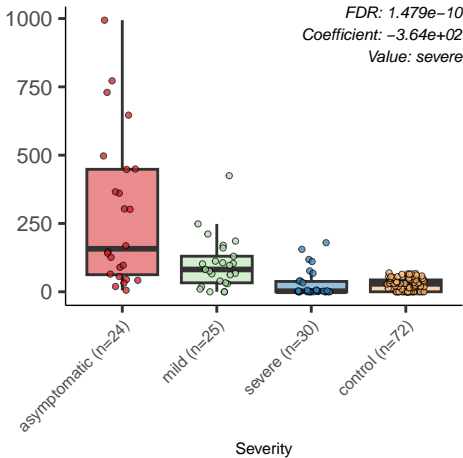

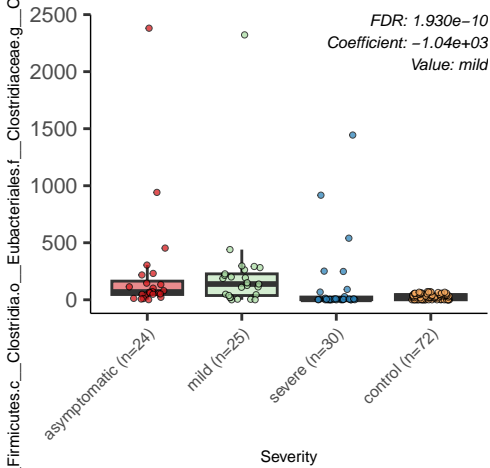

cteria.p\_\_Proteobacteria.c\_\_Deltaproteobacteria.o\_\_Desulfovibrion

*FDR: 2.172e-10*  
*Coefficient: -5.03e+02*  
*Value: mild*

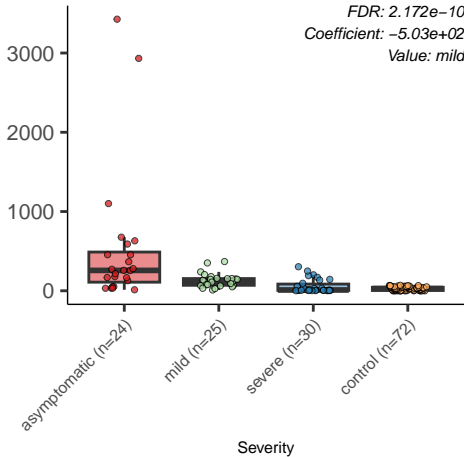

d\_Bacteria.p\_Tenericutes.p\_Mollicutes.o\_Entomoplasmatales.f

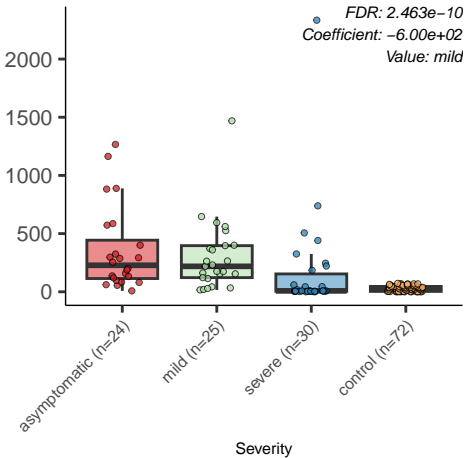

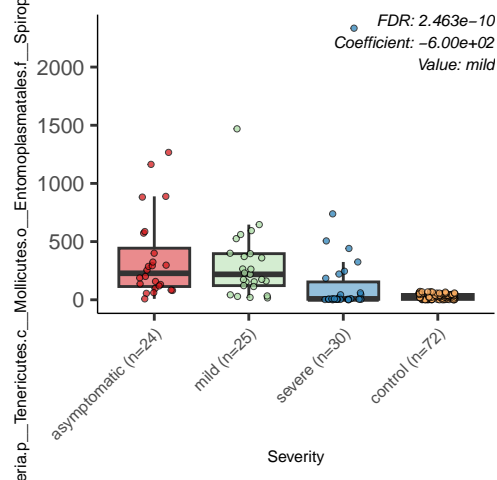



Bacteria.p\_\_Firmicutes.c\_\_Clostridia.o\_\_Eubacteriales.f\_\_Lachnosp

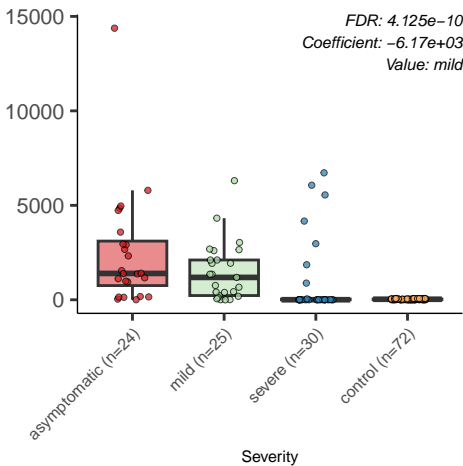

Firmicutes.c\_\_Clostridia.o\_\_Eubacteriales.f\_\_Lachnospiraceae.g

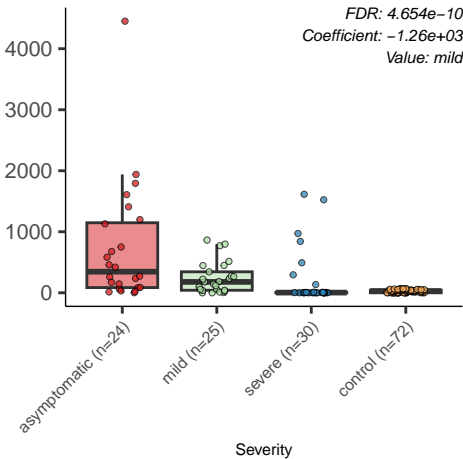

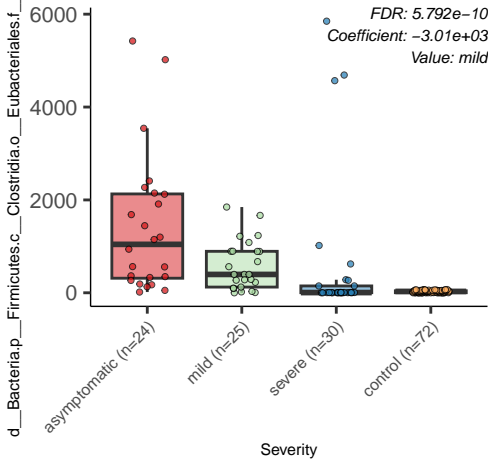

Firmicutes.c\_\_Bacilli.o\_\_Lactobacillales.f\_\_Streptococcaceae.g\_\_S

FDR:  $7.416e-10$   
Coefficient:  $-1.58e+03$   
Value: mild

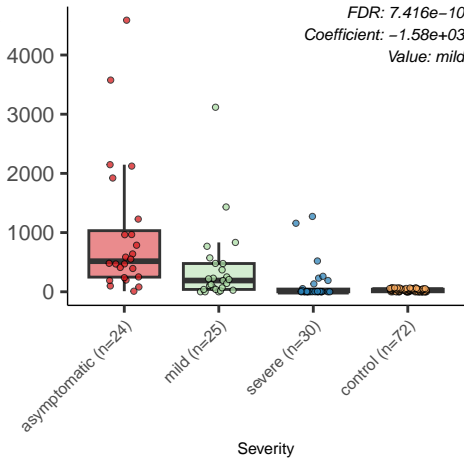

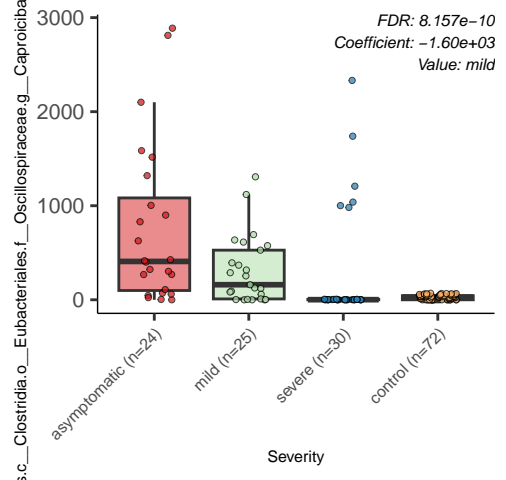

mmaproteobacteria.o\_\_Cardiobacteriales.f\_\_Cardiobacteriaceae.g

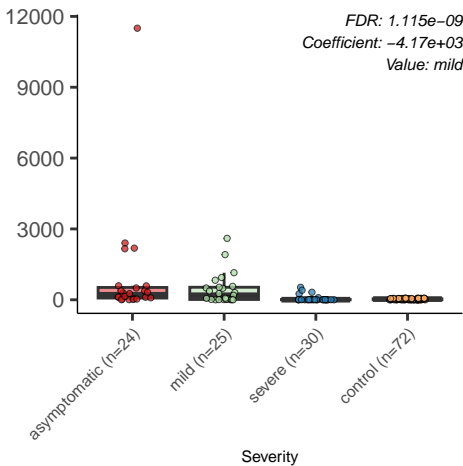

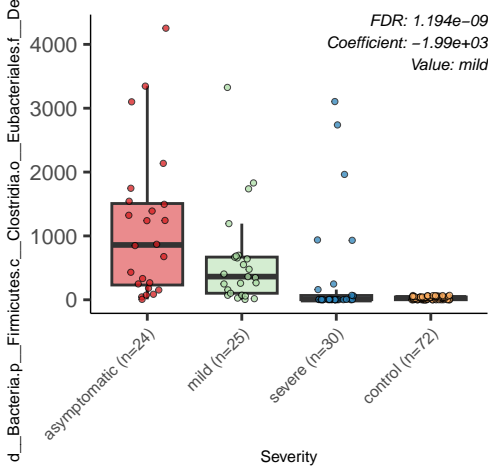

micutes.c\_\_Bacilli.o\_\_Lactobacillales.f\_\_Streptococcaceae.g\_\_Streptococcus

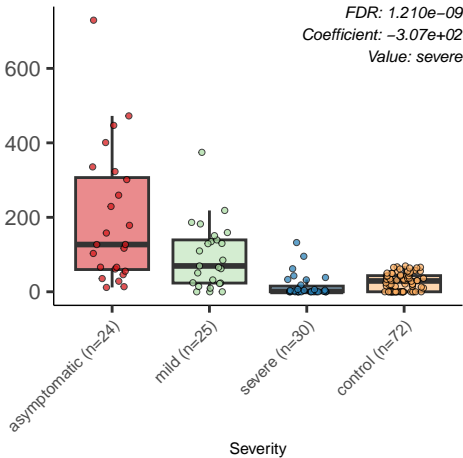



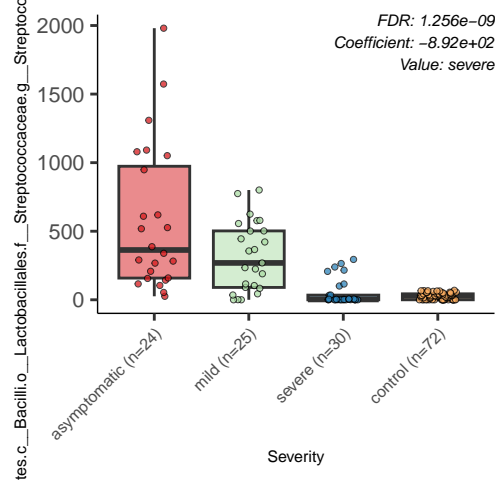

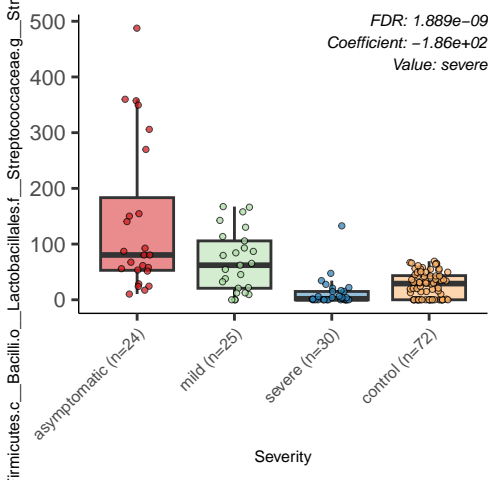

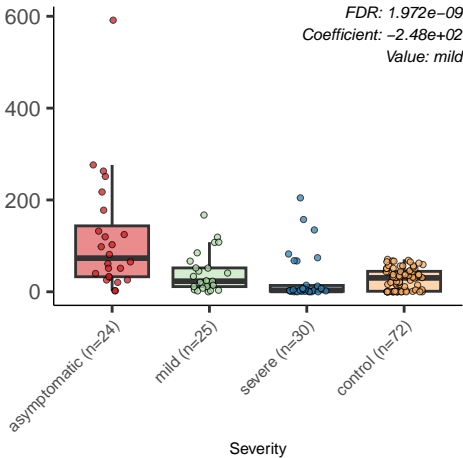

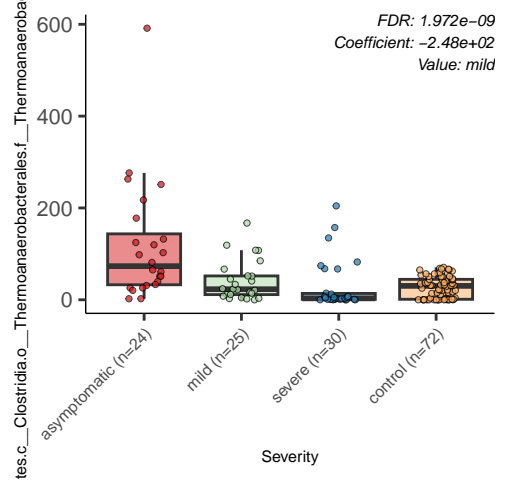

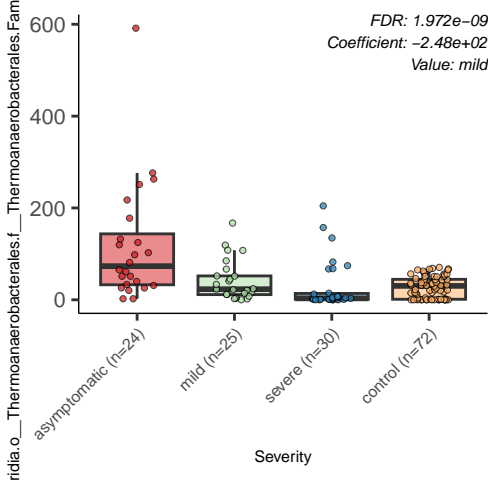

rmicutes.c\_\_Bacilli.o\_\_Lactobacillales.f\_\_Streptococcaceae.g\_\_Stre

*FDR: 2.336e-09*  
*Coefficient: -2.90e+03*  
*Value: severe*

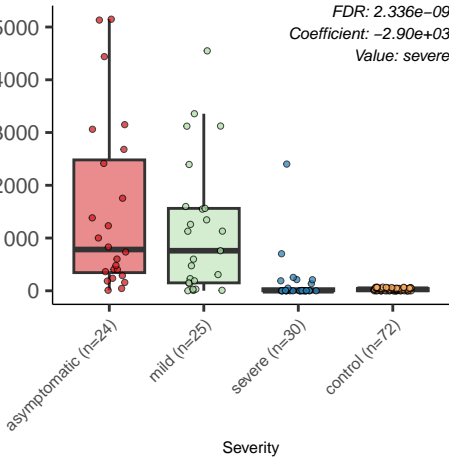

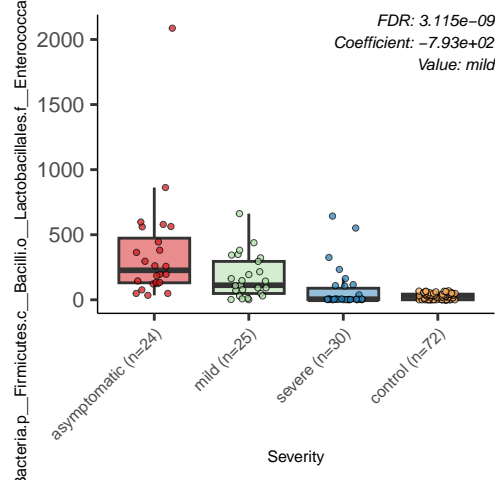

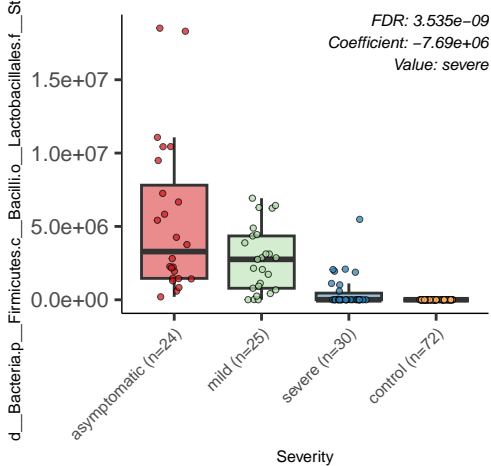



Bacteria.p\_Firmicutes.c\_Bacilli.o\_Lactobacillales.f\_Streptococ

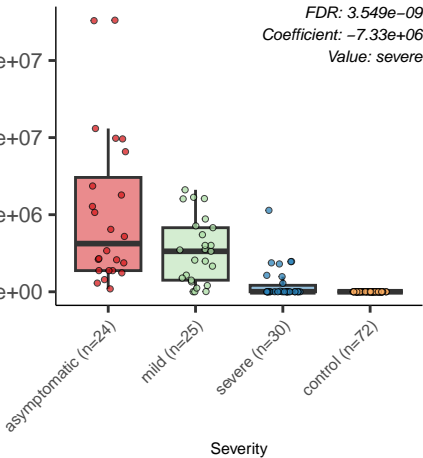

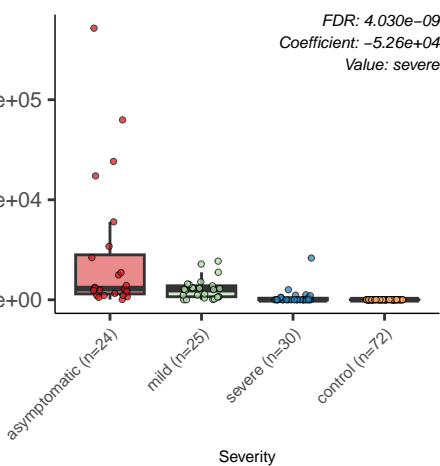

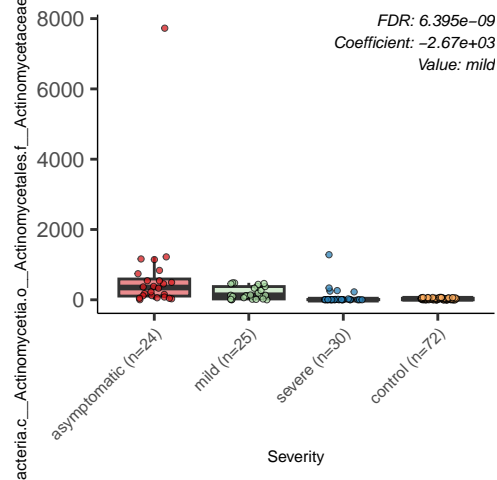

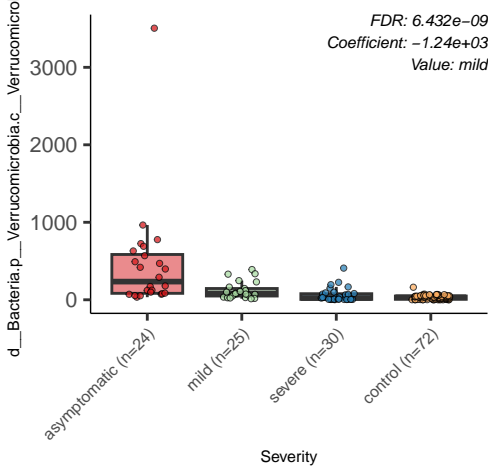

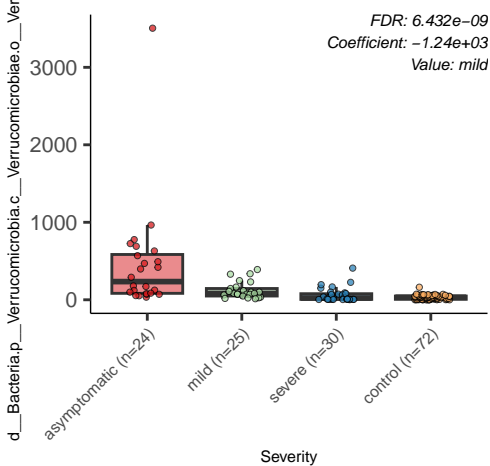

utes.c\_\_Tissierellia.o\_\_Tissierellales.f\_\_Peptoniphilaceae.g\_\_Anaer

*FDR: 8.260e-09*  
*Coefficient: -1.98e+03*  
*Value: mild*

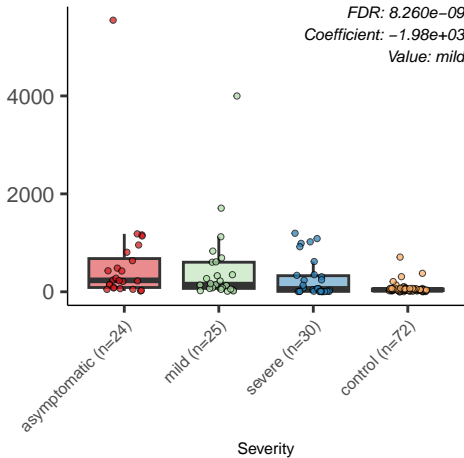

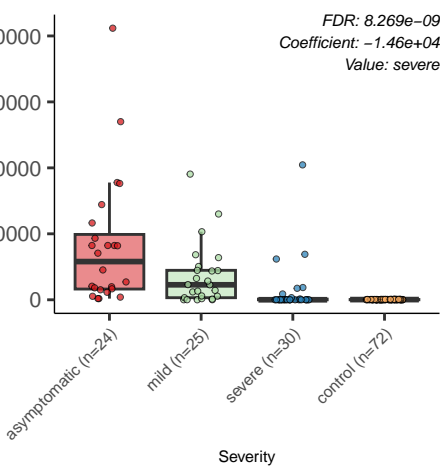

Saccharibacteria.c\_\_Candidatus.Saccharimonadia.o\_\_Candidatus.Sac

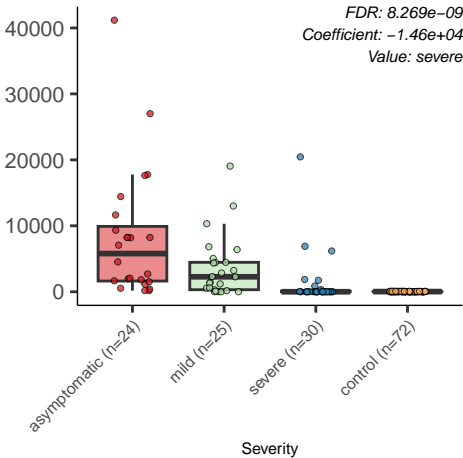



Candidatus.Saccharimonadia.o\_\_Candidatus.Saccharimonadales

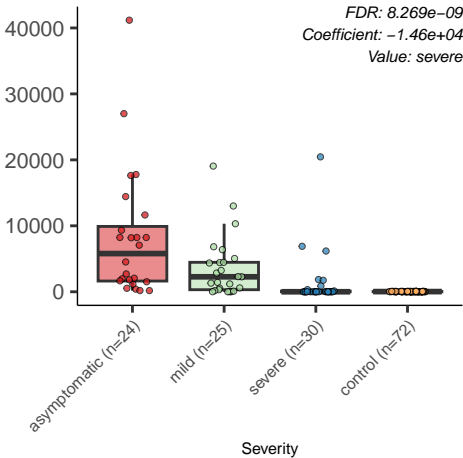

monadia.o\_\_Candidatus.Saccharimonadales.f\_\_Candidatus.Saccha

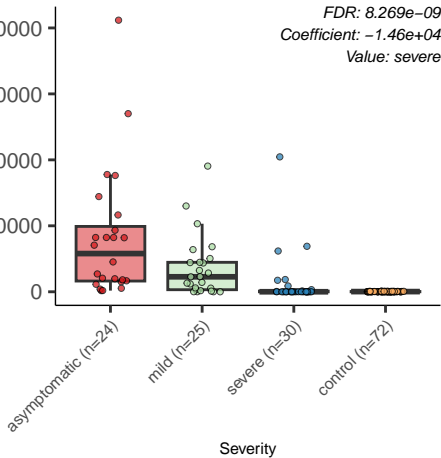

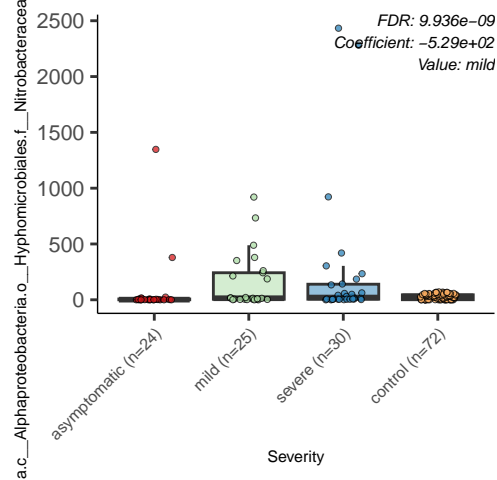

irmicutes.c\_\_Bacilli.o\_\_Lactobacillales.f\_\_Streptococcaceae.g\_\_Stre

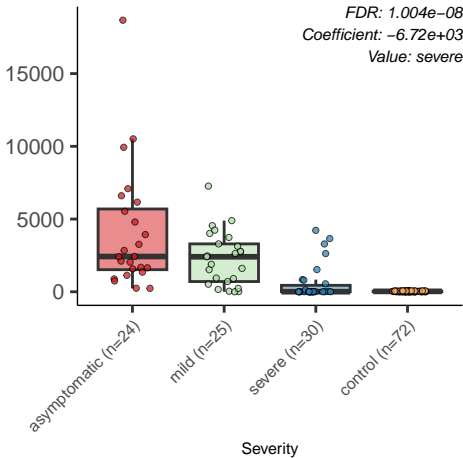

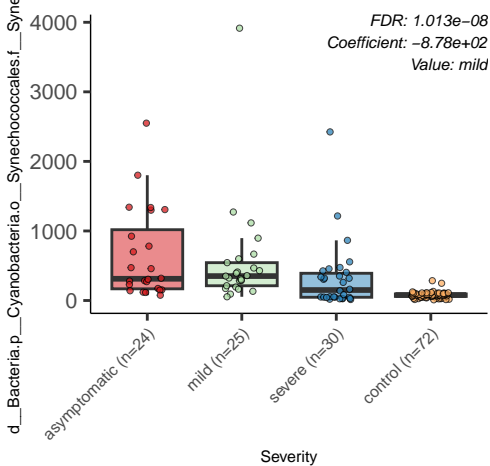

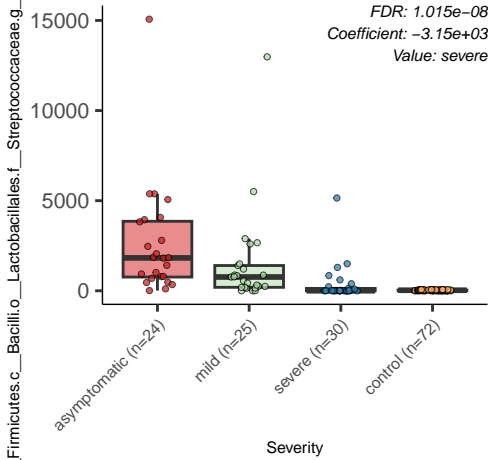

Bacteria.p\_\_Cyanobacteria.o\_\_Synechococcales.f\_\_Synechococcales

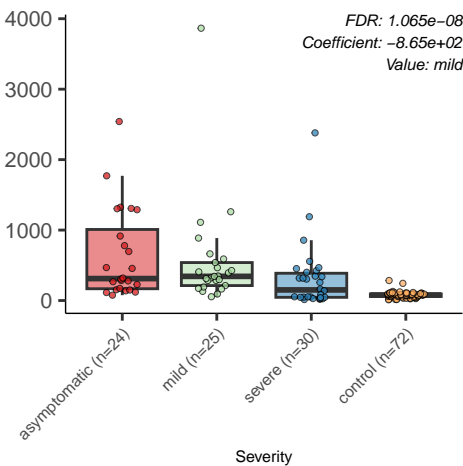

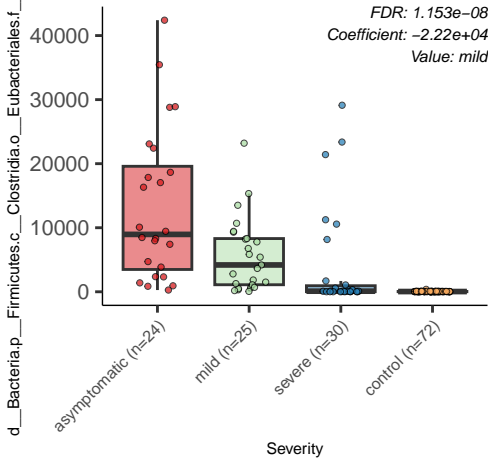



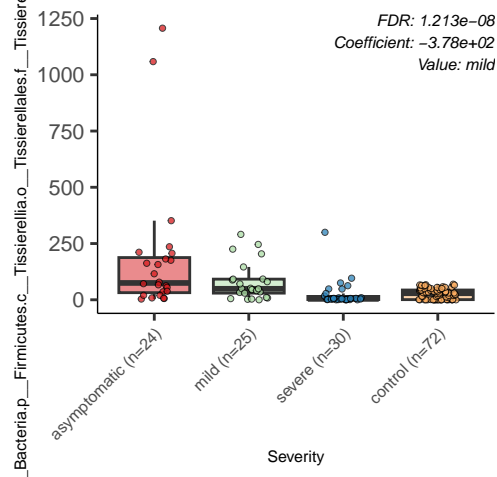

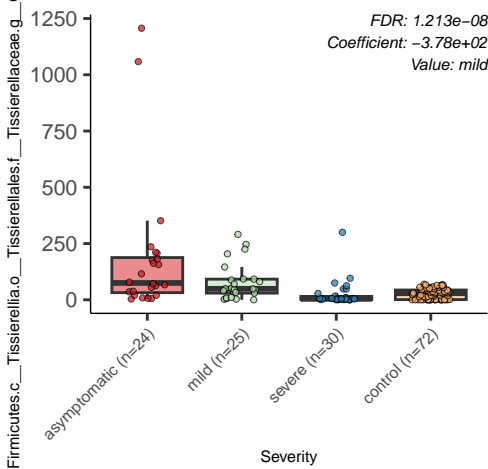

acteria.p\_\_Firmicutes.c\_\_Clostridia.o\_\_Eubacteriales.f\_\_Oscillospira

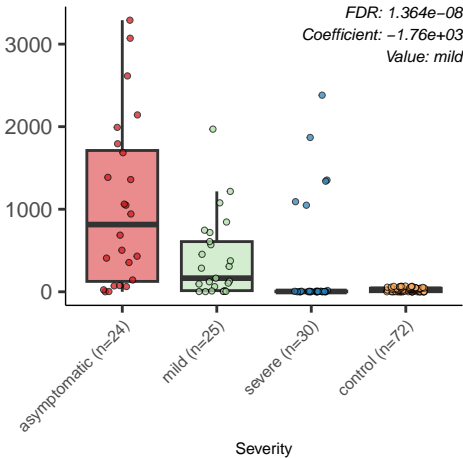

a.p\_\_Proteobacteria.c\_\_Betaproteobacteria.o\_\_Burkholderiales.f\_\_C

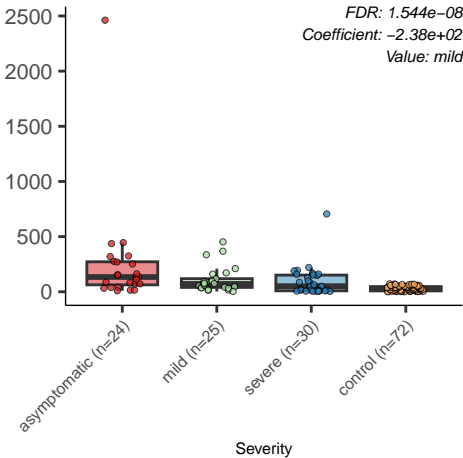

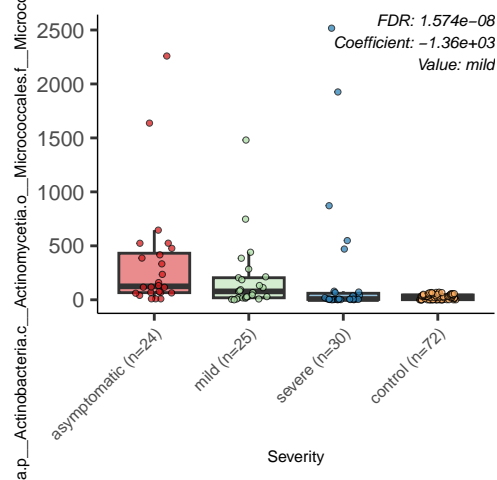

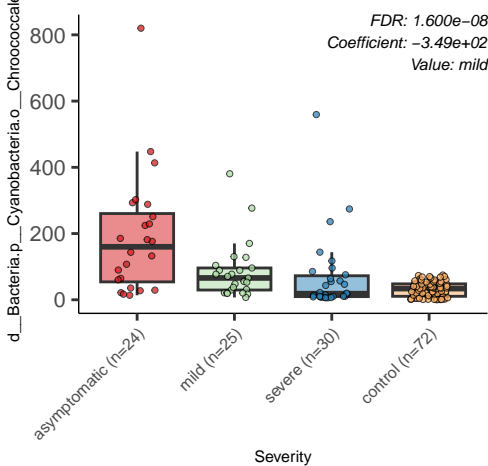

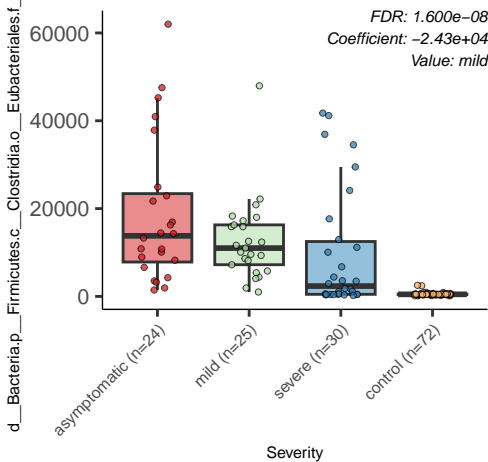

\_Bacteria.p\_\_Firmicutes.c\_\_Clostridia.o\_\_Eubacteriales.f\_\_Lachnos

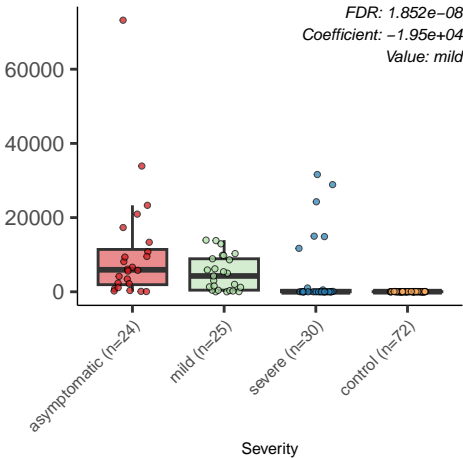



acteria.p\_\_Verrucomicrobia.c\_\_Verrucomicrobiae.o\_\_Verrucomicrobia

*FDR: 1.906e-08*  
*Coefficient: -1.14e+03*  
*Value: mild*

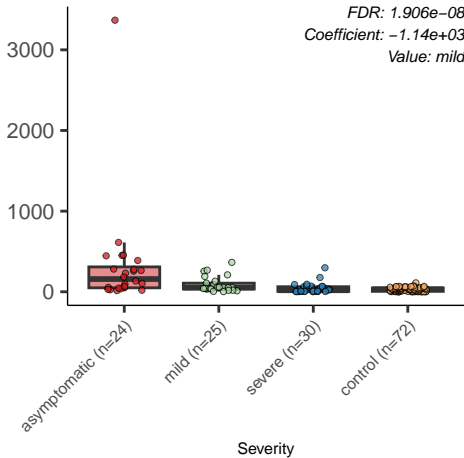

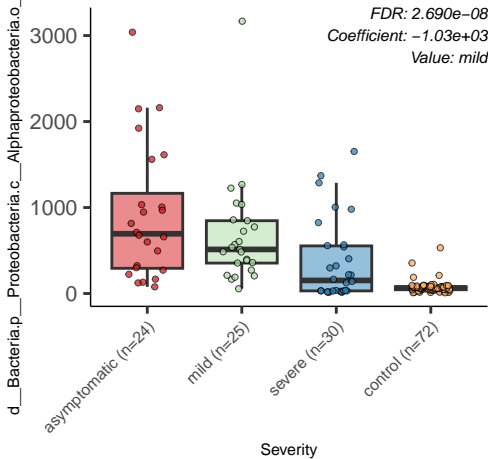

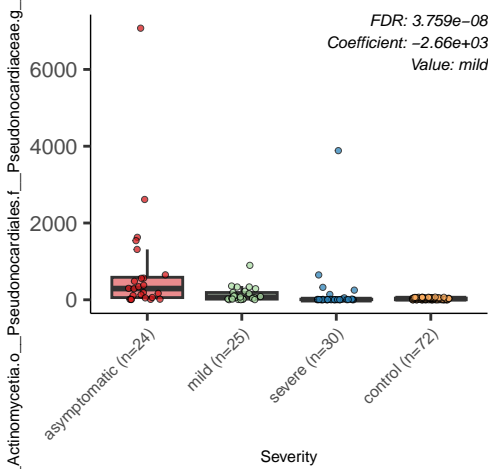

Actinobacteria.c\_Actinomycetia.o\_Pseudonocardiales.f\_Pseudo

FDR:  $4.487e-08$   
Coefficient:  $-2.67e+03$   
Value: mild

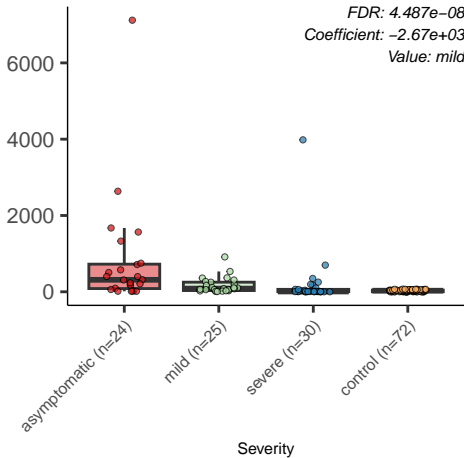

Bacteria.p\_Actinobacteria.c\_Thermoleophilia.o\_Solirubrobactera

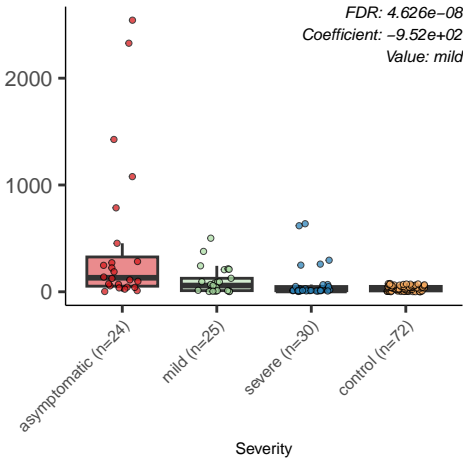

o\_Actinobacteria.c\_Thermoleophilia.o\_Solirubrobacterales.f\_Co

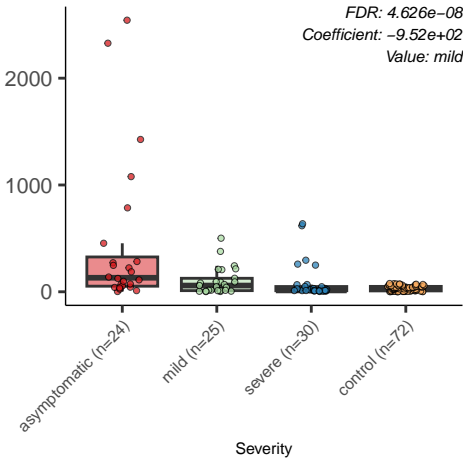

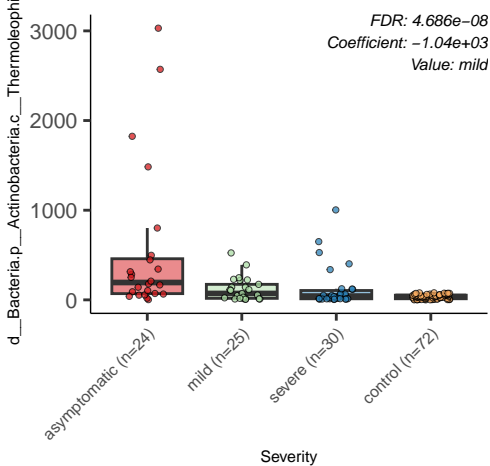

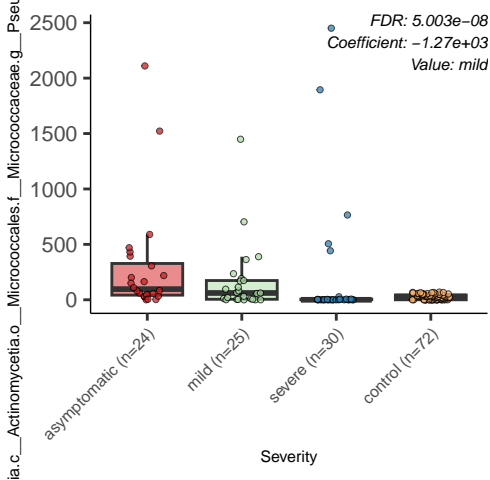



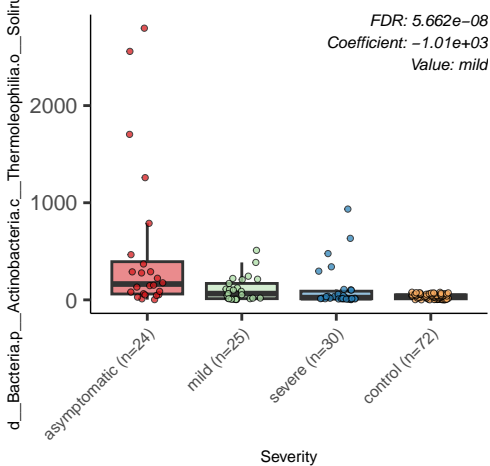

d\_Bacteria.p\_Acidobacteria

*FDR: 6.240e-08*  
*Coefficient: -2.52e+03*  
*Value: mild*

4000

2000

0

asymptomatic (n=24)

mild (n=25)

severe (n=30)

control (n=72)

Severity

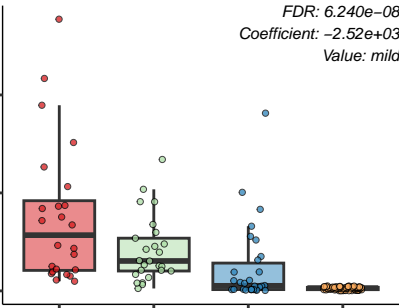

Firmicutes.c\_Bacilli.o\_Lactobacillales.f\_Streptococcaceae.g

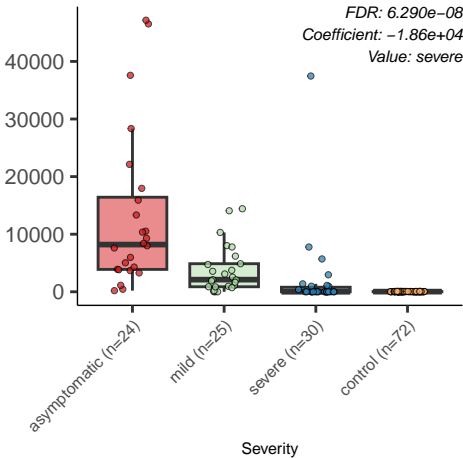

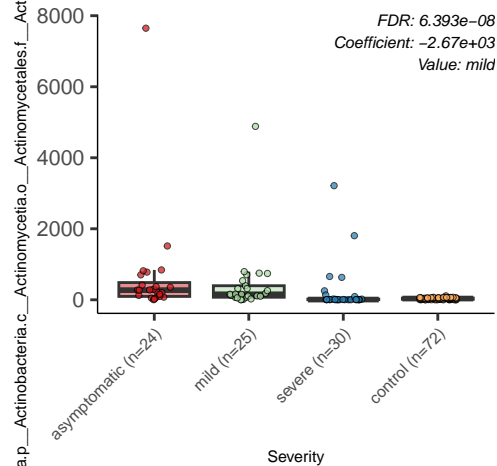

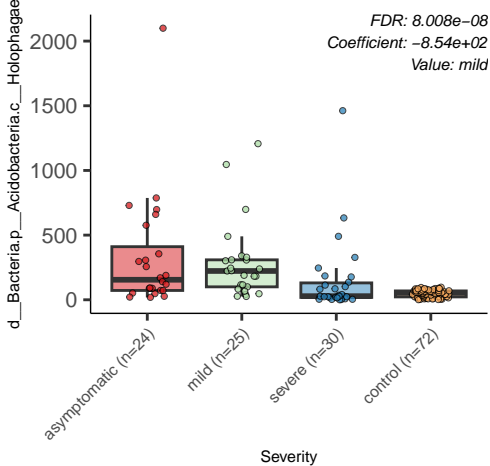

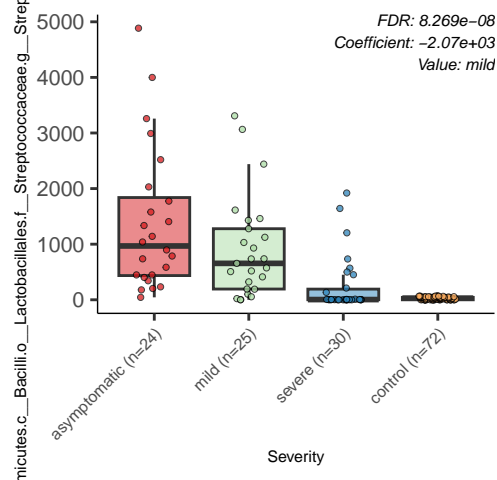

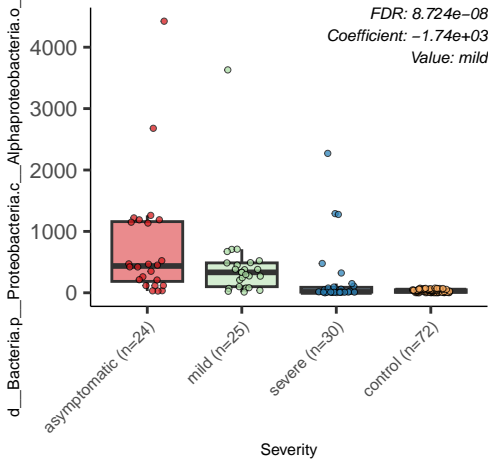

d\_Bacteria.p\_Acidobacteria.c\_Holophagae.o\_Acanthop

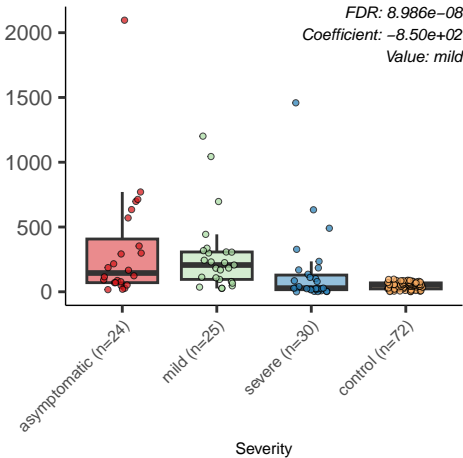



terial.p\_\_Acidobacteria.c\_\_Holophagae.o\_\_Acanthopleuribacteriales.

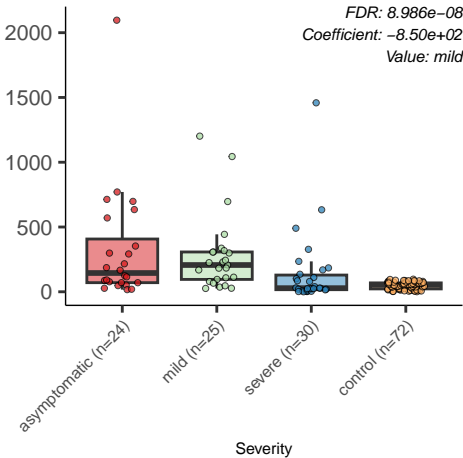

Acidobacteria.c\_\_Holophagae.o\_\_Acanthopleuribacterales.f\_\_Acan

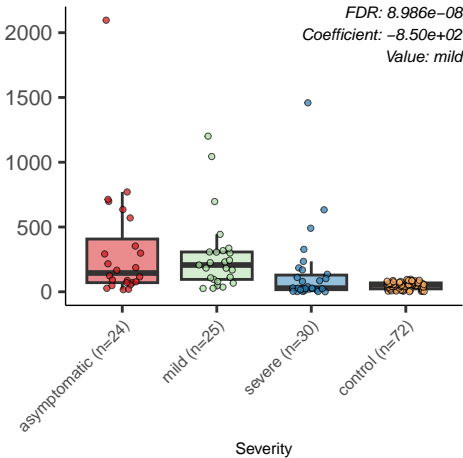

i.c.\_Holophagae.o\_Acanthopleuribacterales.f\_Acanthopleuribacte

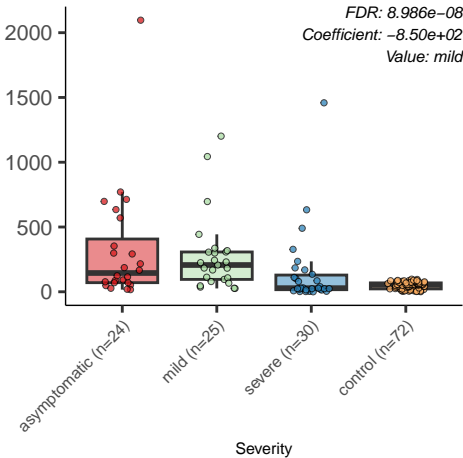

d\_Bacteria.p\_\_Tenericutes.c\_\_Mollicutes.o\_\_Acholeplasma

FDR:  $9.621e-08$   
Coefficient:  $-9.97e+02$   
Value: mild

6000

4000

2000

0

asymptomatic (n=24)

mild (n=25)

severe (n=30)

control (n=72)

Severity

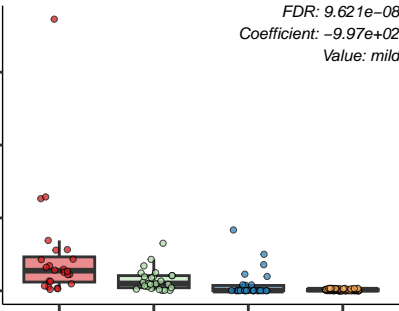

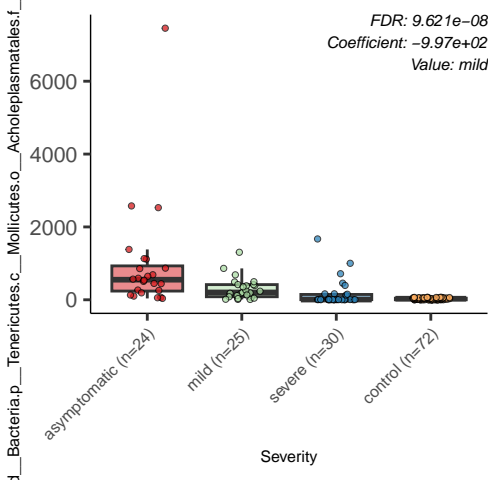

Bacteria.p\_\_Proteobacteria.c\_\_Alphaproteobacteria.o\_\_Holospor

FDR:  $1.048e-07$   
Coefficient:  $-1.72e+03$   
Value: mild

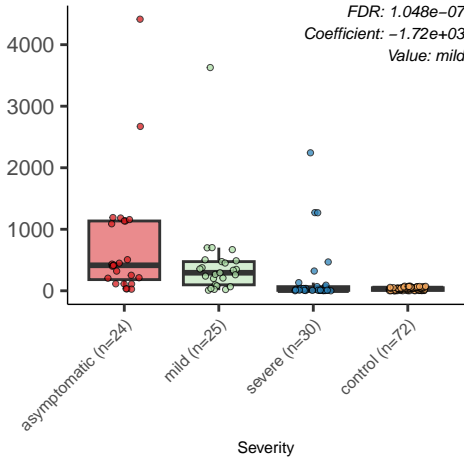

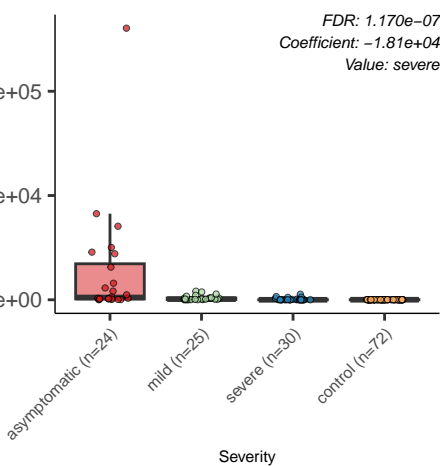

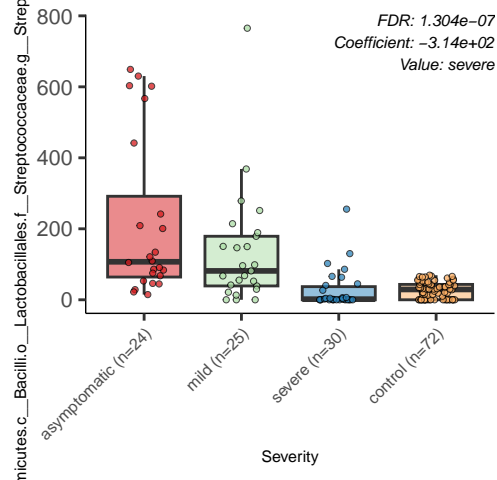



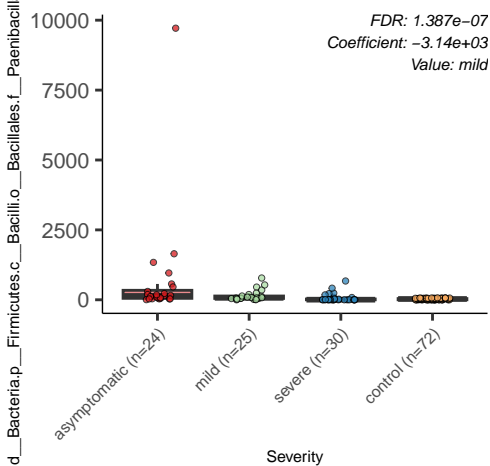

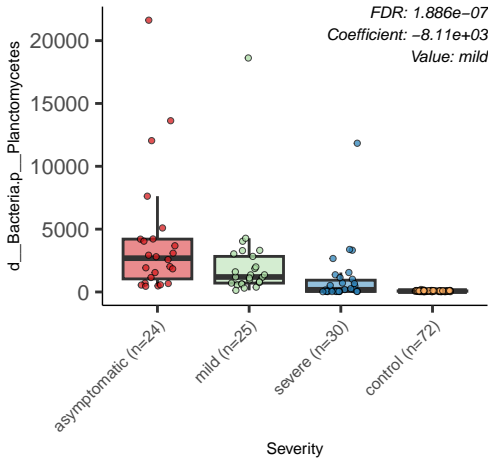

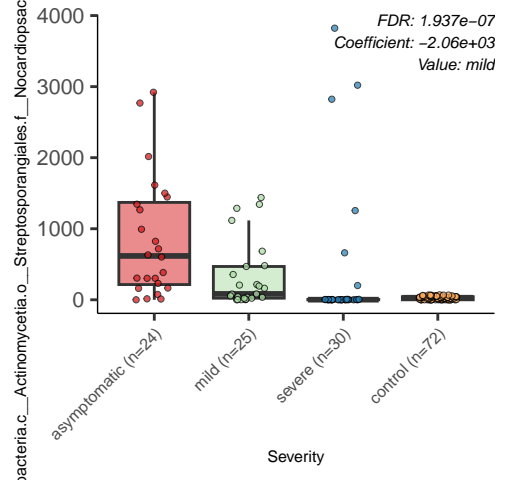

d\_\_Bacteria.p\_\_Planctomycetes.c\_\_Planctomycetes

FDR:  $2.201e-07$   
Coefficient:  $-7.97e+03$   
Value: mild

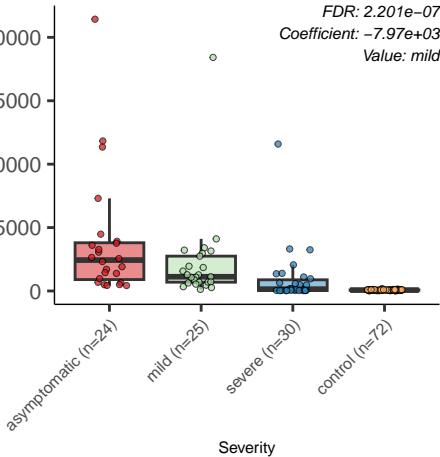

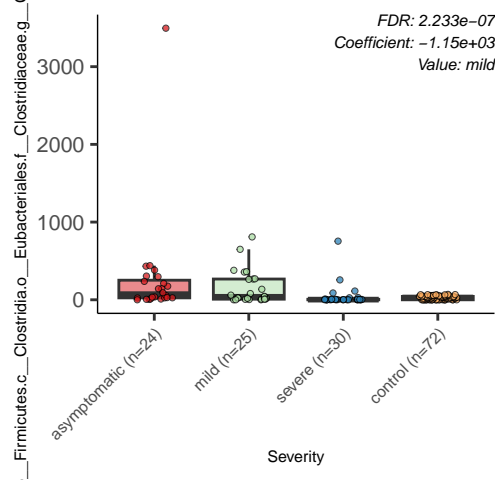

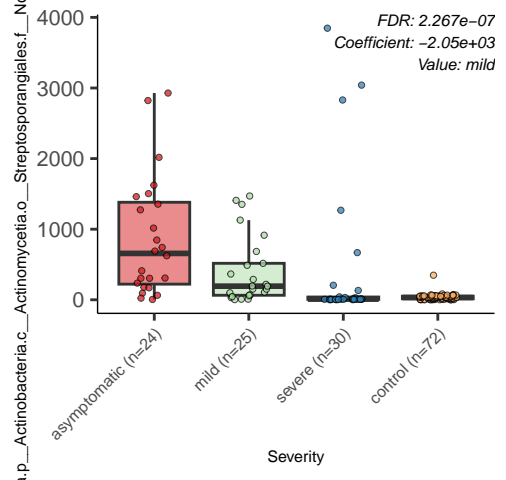

ria.p\_\_Proteobacteria.c\_\_Gammaproteobacteria.o\_\_Enterobactera

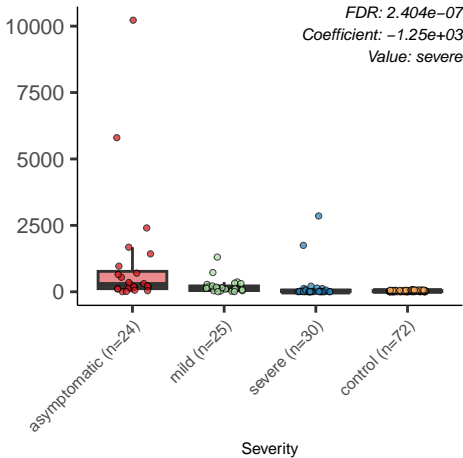

Proteobacteria.c\_\_Gammaproteobacteria.o\_\_Oceanospirillales.f\_\_

1e+05

5e+04

0e+00

asymptomatic (n=24)

mild (n=25)

severe (n=30)

control (n=72)

Severity

FDR: 2.410e-07  
Coefficient: -2.31e+04  
Value: mild

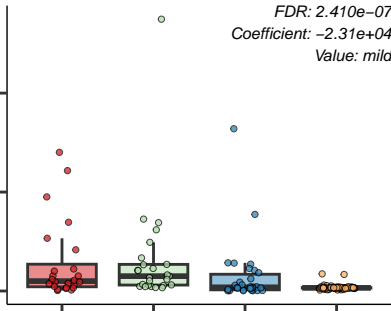



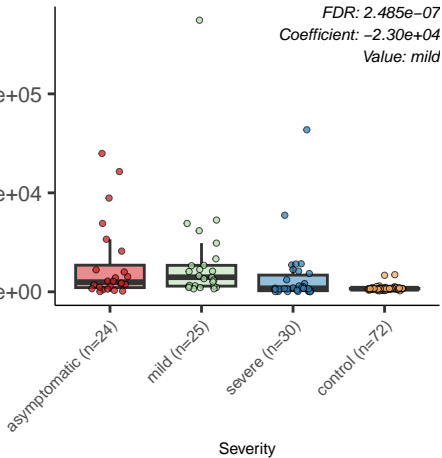

cutus.c\_\_Bacilli.o\_\_Lactobacillales.f\_\_Streptococcaceae.g\_\_Strepto

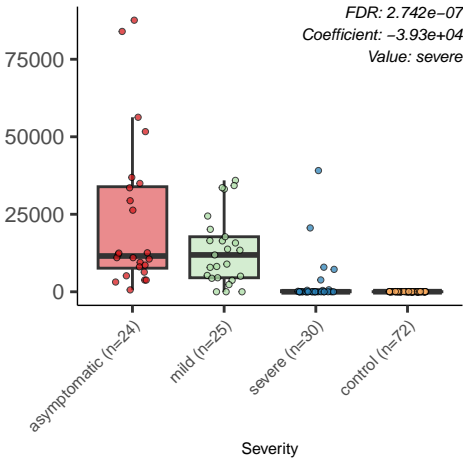

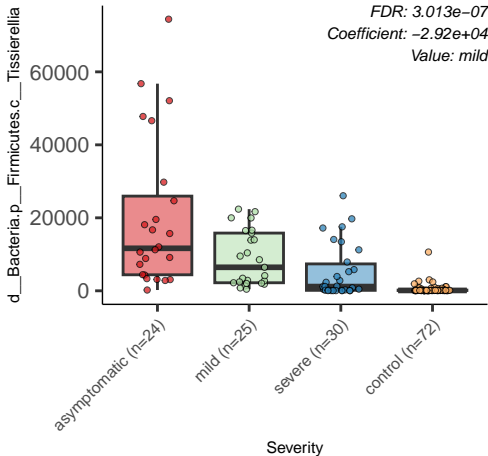

bacteria.p\_\_Proteobacteria.c\_\_Gammaproteobacteria.o\_\_Oceanospir

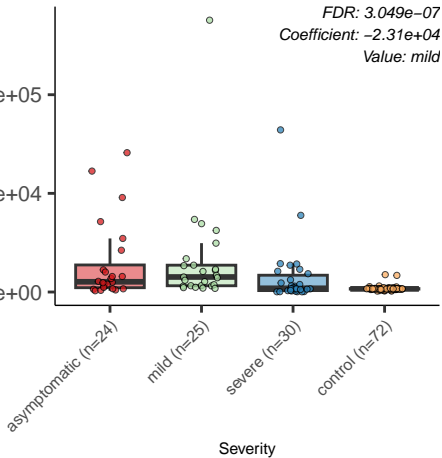

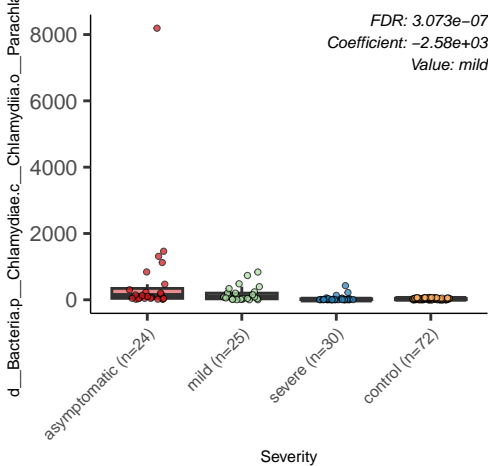

d\_\_Bacteria.p\_\_Proteobacteria.c\_\_Betaproteobacteria.o\_\_Burkholderia

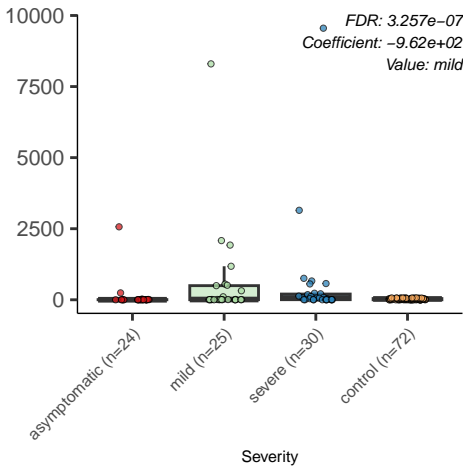

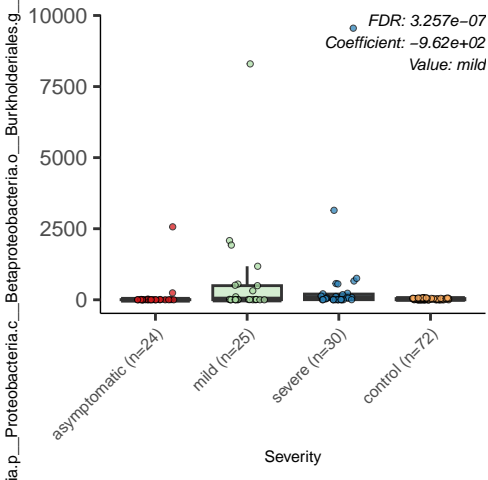

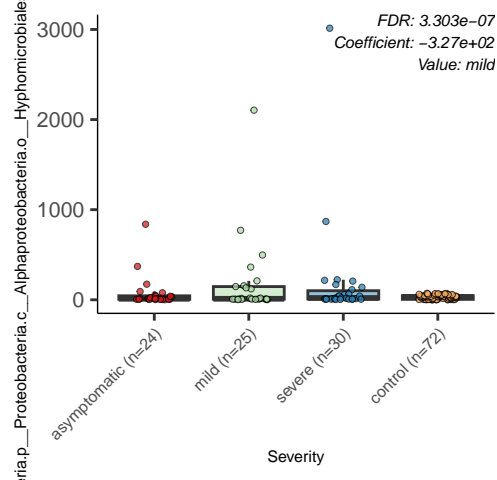



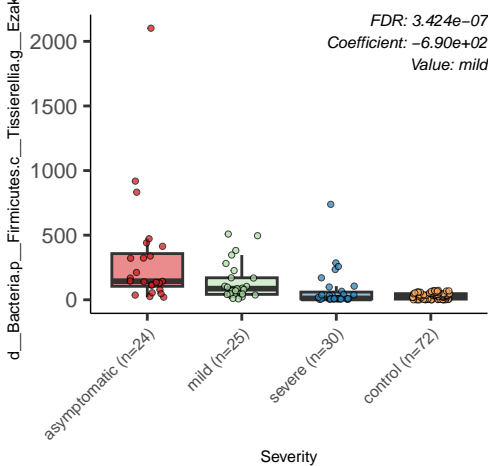

bbacteria.c\_\_Actinomycetia.o\_\_Actinomycetales.f\_\_Actinomycetaceae

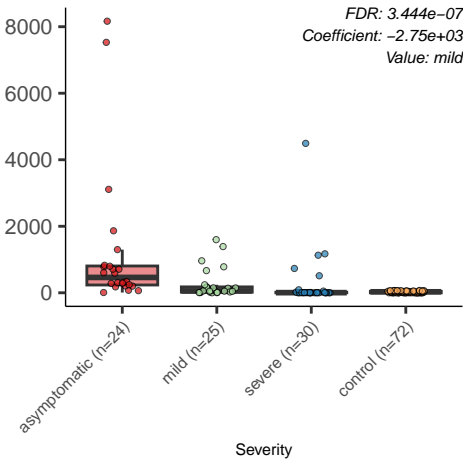

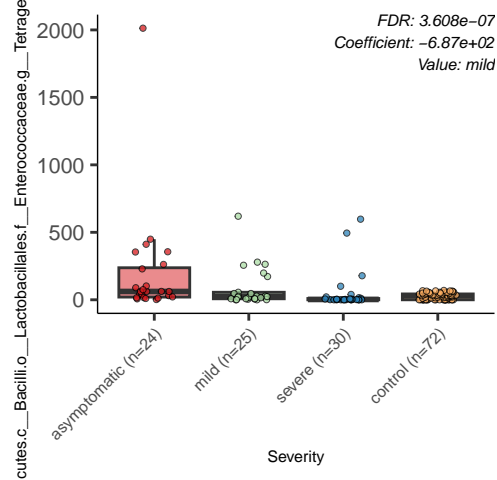

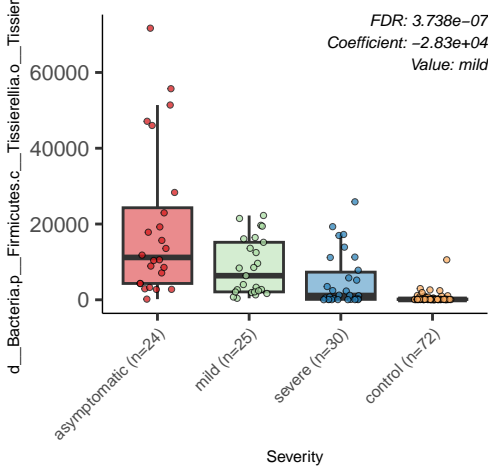

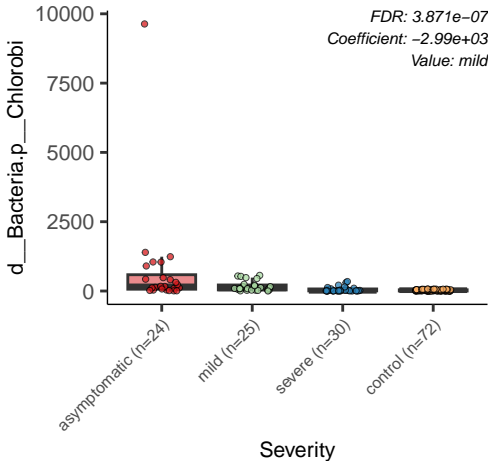

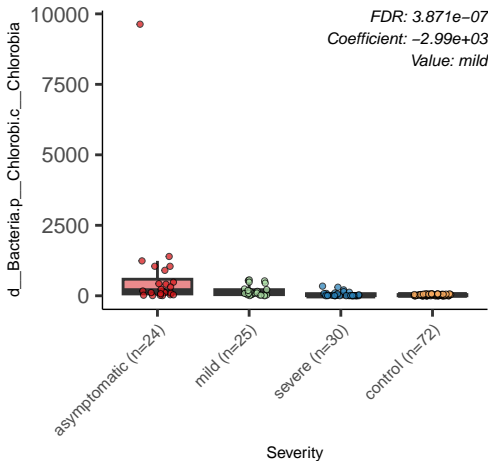

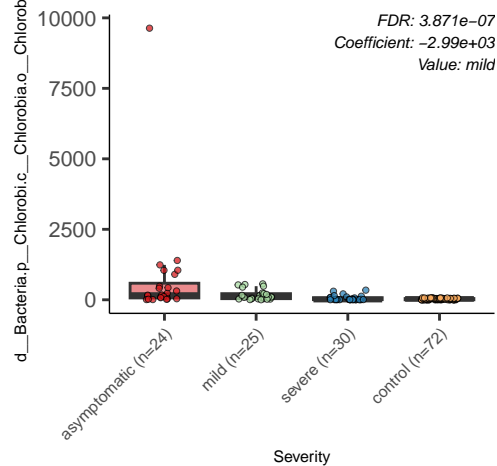

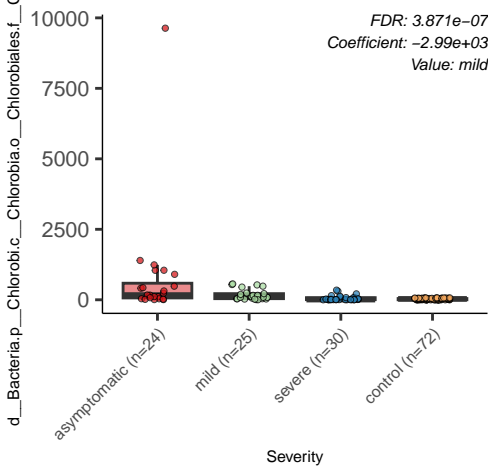



Firmicutes.c\_\_Bacilli.o\_\_Lactobacillales.f\_\_Streptococcaceae.g\_\_S

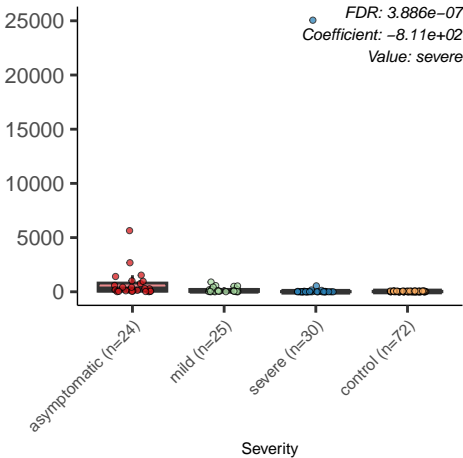

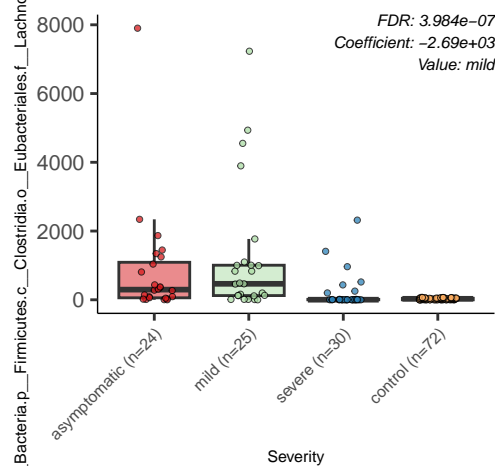

ia.p\_Firmicutes.c\_Clostridia.o\_Eubacteriales.f\_Lachnospiraceae

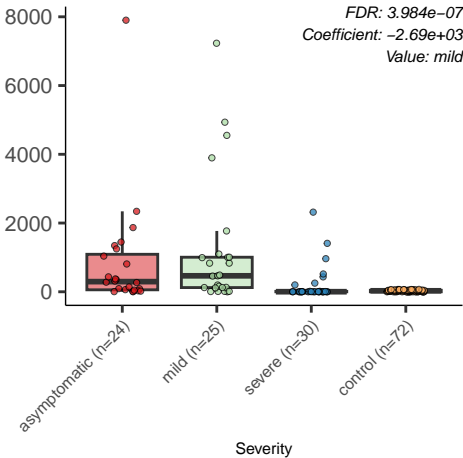

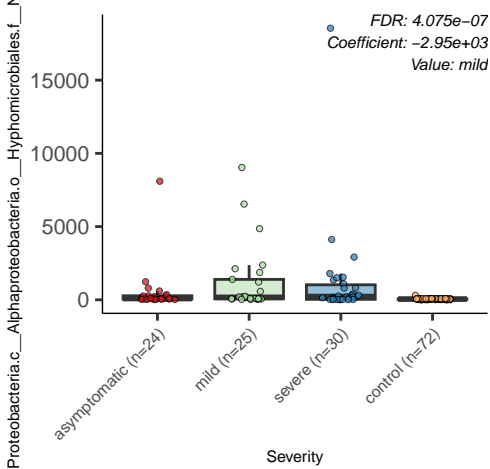

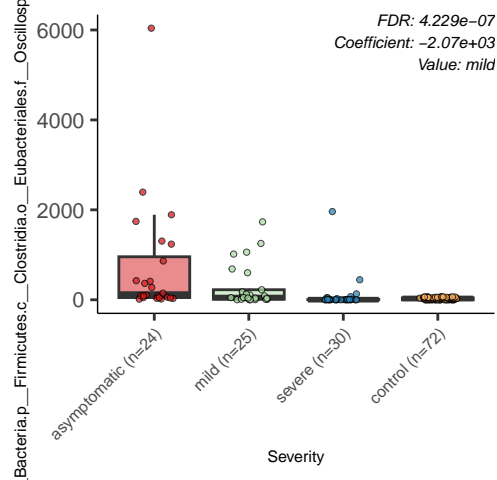

Firmicutes.c\_\_Clostridia.o\_\_Eubacteriales.f\_\_Oscillospiraceae.g\_\_F

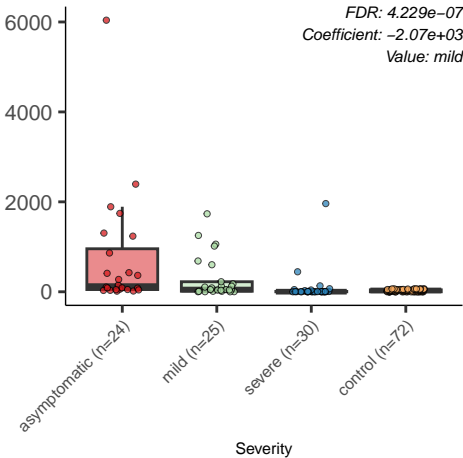

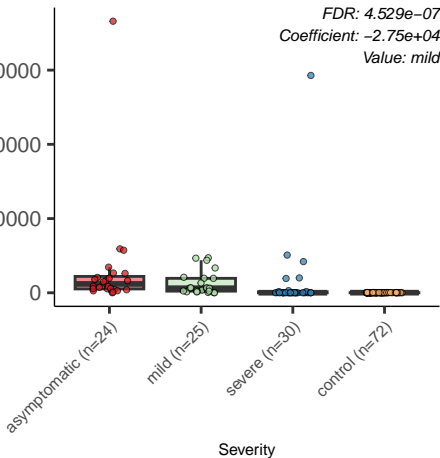

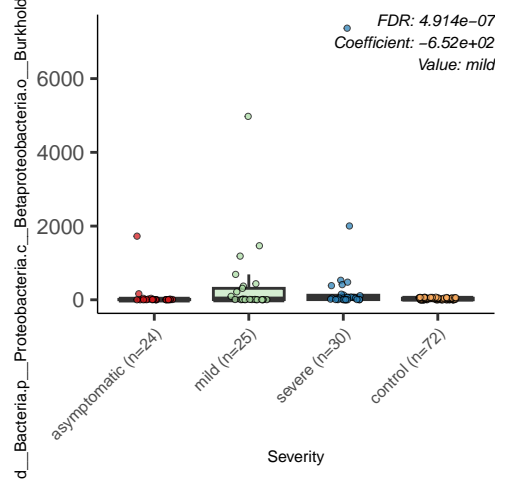



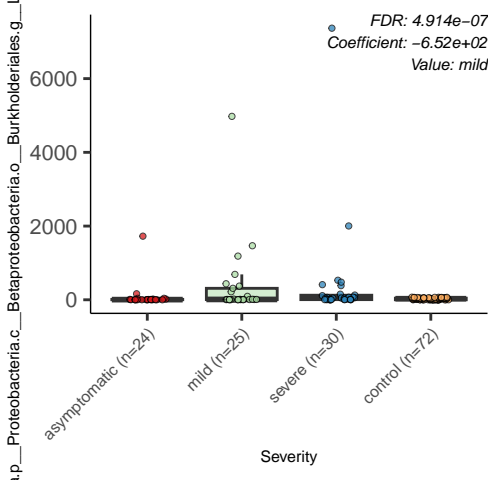

Firmicutes.c\_Bacilli.o\_Lactobacillales.f\_Streptococcaceae.g\_St

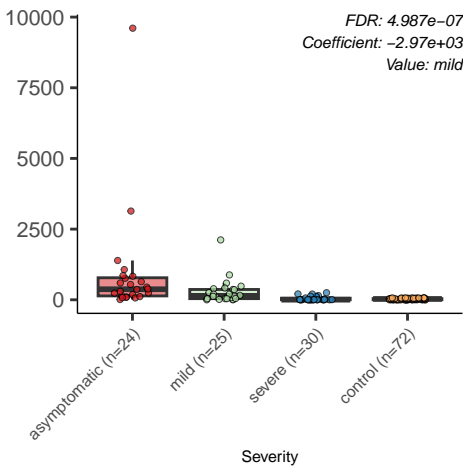

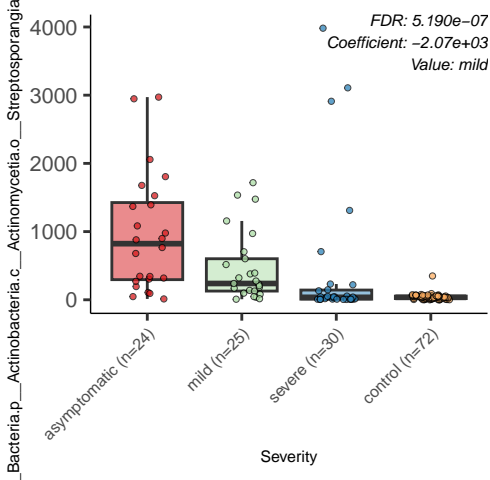

Firmicutes.c\_Bacilli.o\_Lactobacillales.f\_Streptococcaceae.g\_s

FDR: 5.328e-07  
Coefficient: -1.30e+03  
Value: severe

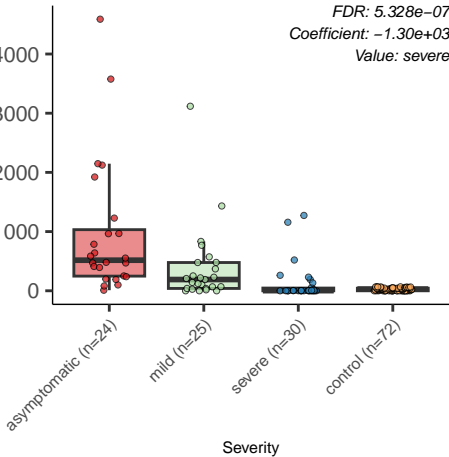

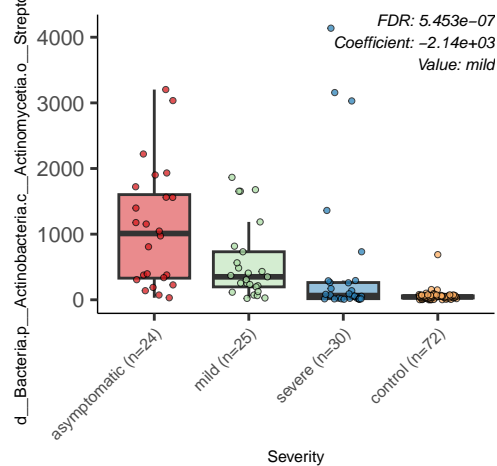

rmicutes.c\_\_Bacilli.o\_\_Lactobacillales.f\_\_Streptococcaceae.g\_\_Stre

*FDR: 5.631e-07*  
*Coefficient: -2.44e+03*  
*Value: severe*

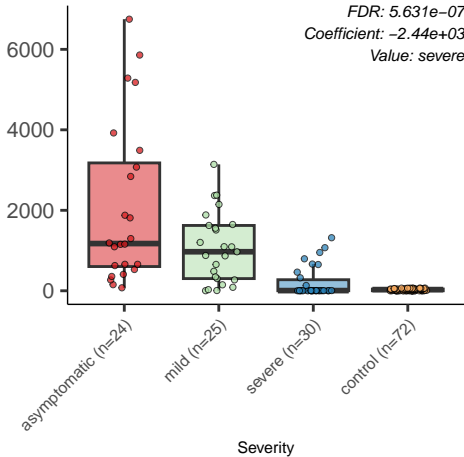

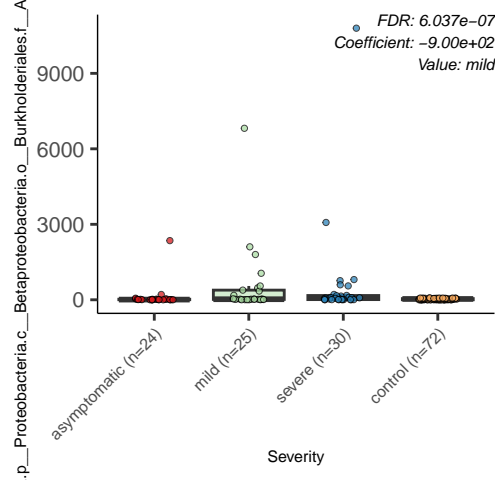

micutes.c\_\_Bacilli.o\_\_Lactobacillales.f\_\_Streptococcaceae.g\_\_Stre

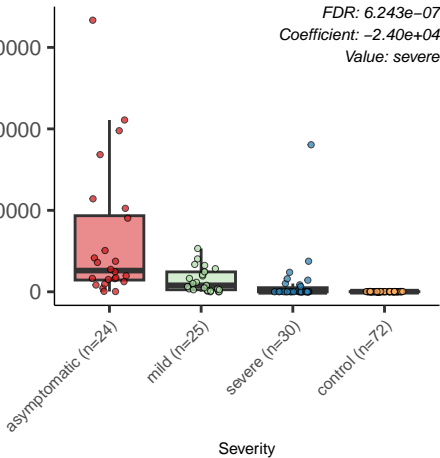



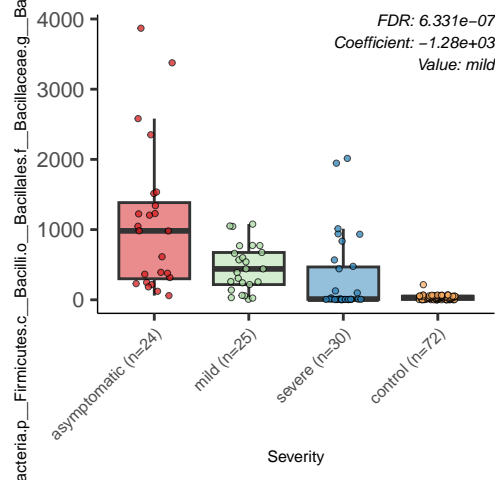

bacteria.c\_Actinomycetia.o\_Actinomycetales.f\_Actinomycetaceae

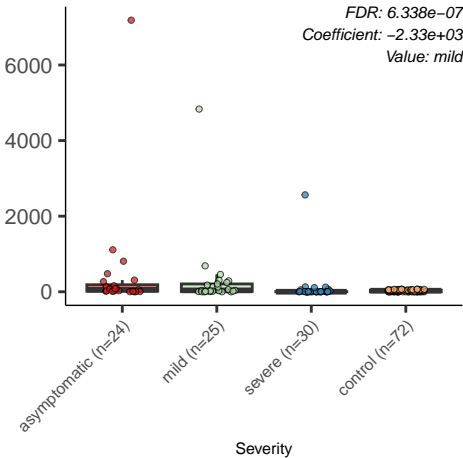

d\_Bacteria.p\_\_Proteobacteria.c\_\_Gammaproteobacteria.o\_\_

*FDR: 6.661e-07*  
*Coefficient: -2.26e+04*  
*Value: mild*

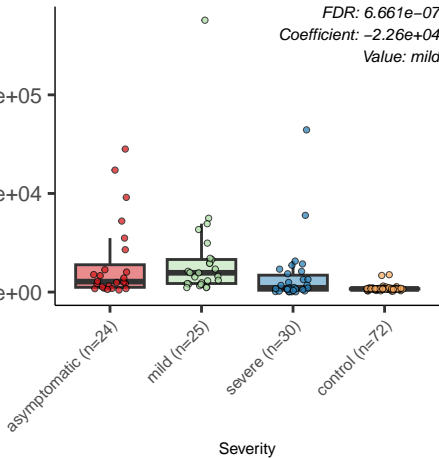

Firmicutes.c\_\_Clostridia.o\_\_Eubacteriales.f\_\_Oscillospiraceae.g

FDR:  $6.740e-07$   
Coefficient:  $-1.19e+03$   
Value: mild

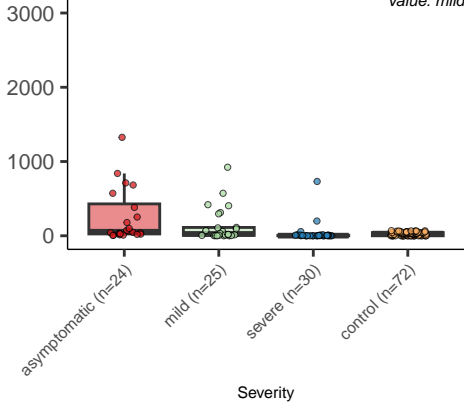

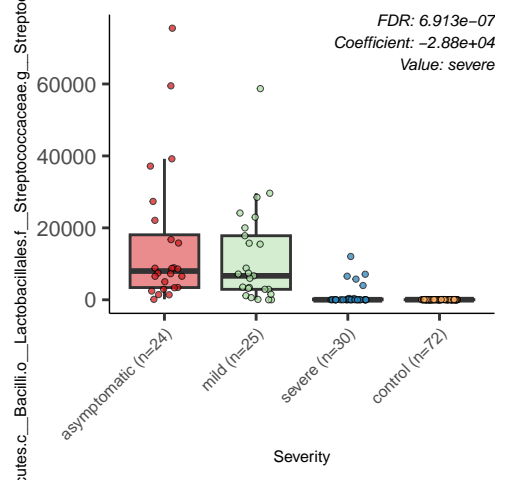

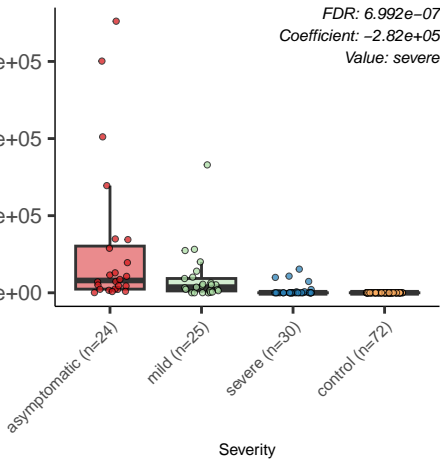

ria.c\_\_Thermoleophilia.o\_\_Solirubrobacterales.f\_\_Conexibacteraceae

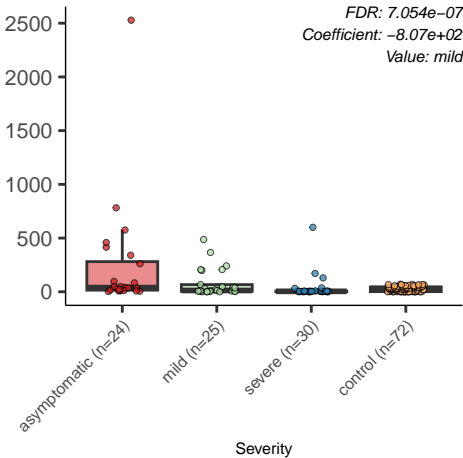

Firmicutes.c\_\_Clostridia.o\_\_Eubacteriales.f\_\_Oscillospiraceae.g\_\_R

*FDR: 7.209e-07*  
*Coefficient: -1.08e+03*  
*Value: mild*

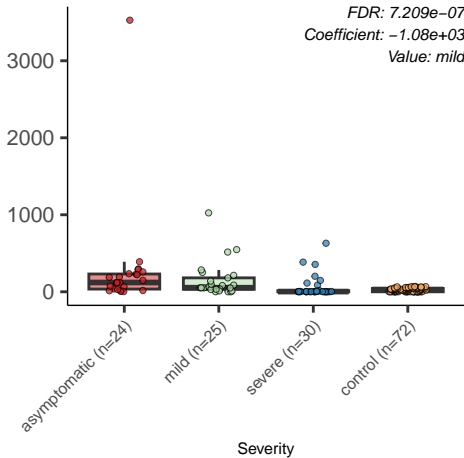



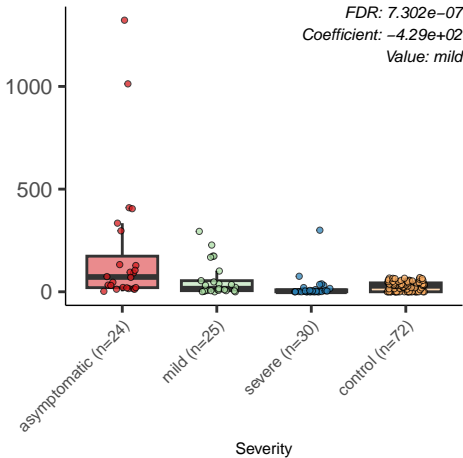

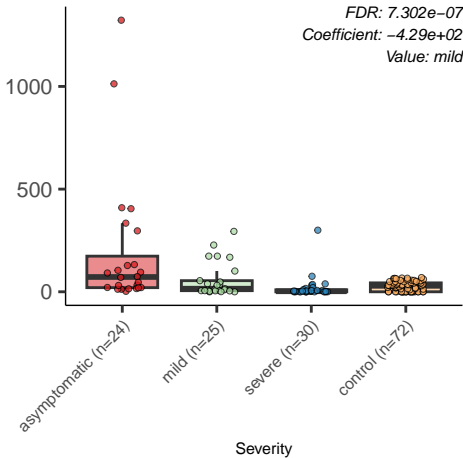

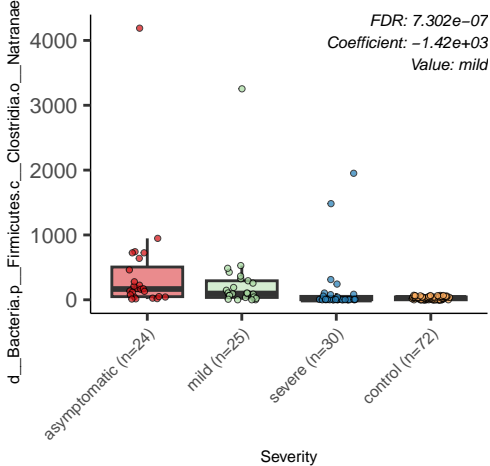

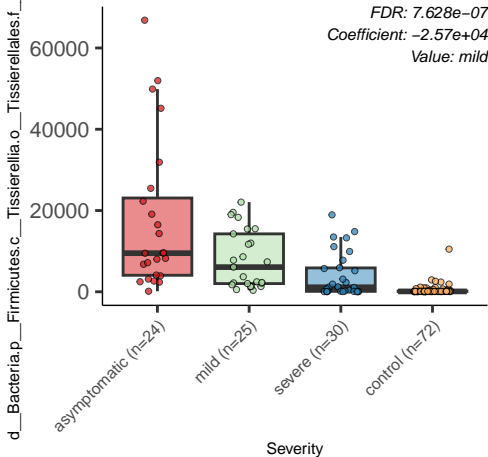

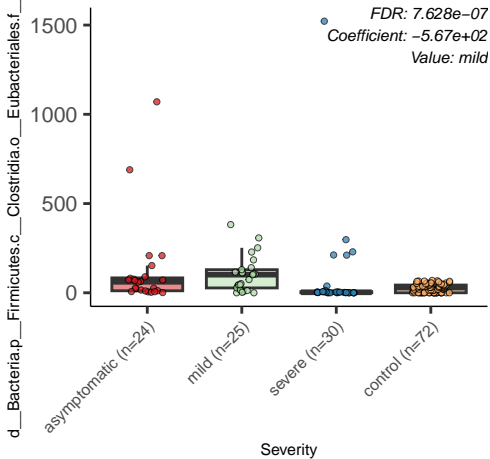

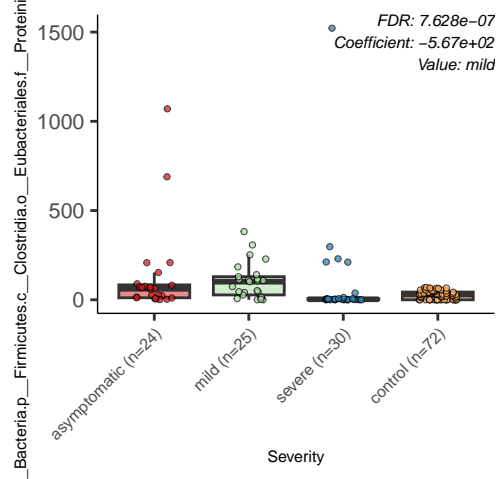

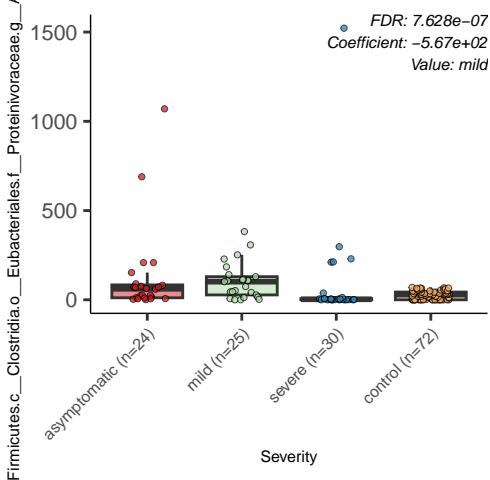

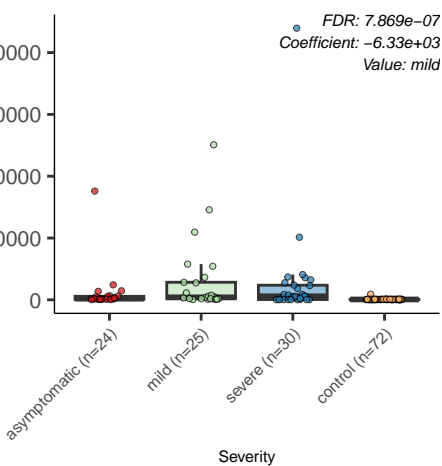



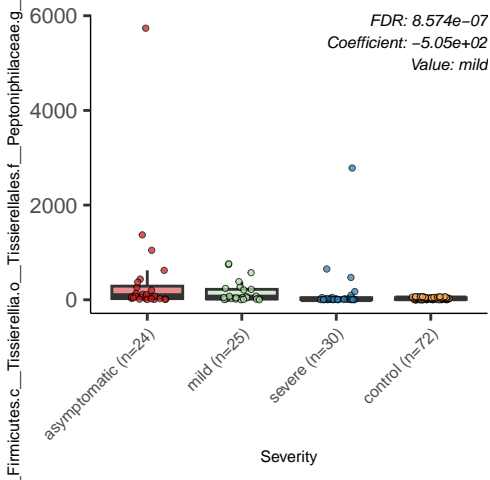

d\_Bacteria.p\_Cyanobacteria.o\_Pseudanabaenales.f\_Lep

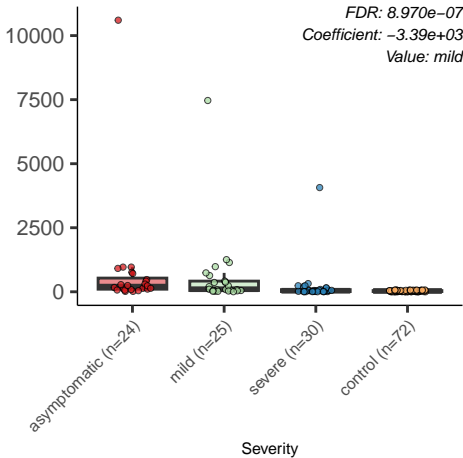

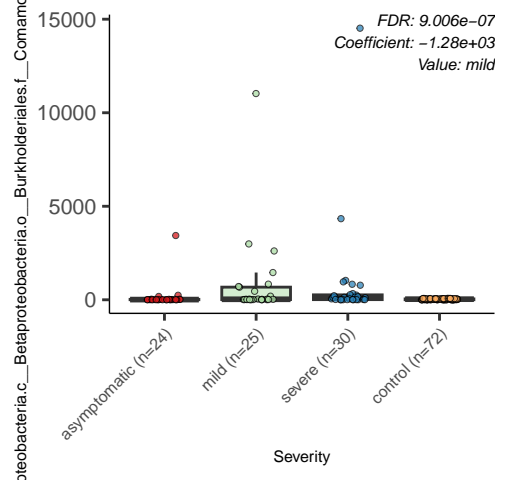

taproteobacteria.o\_\_Burkholderiales.f\_\_Comamonadaceae.g\_\_Can

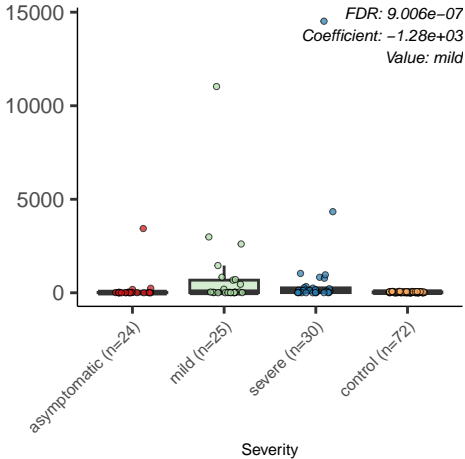

acteria.c\_\_Betaproteobacteria.o\_\_Burkholderiales.f\_\_Alcaligenaceae

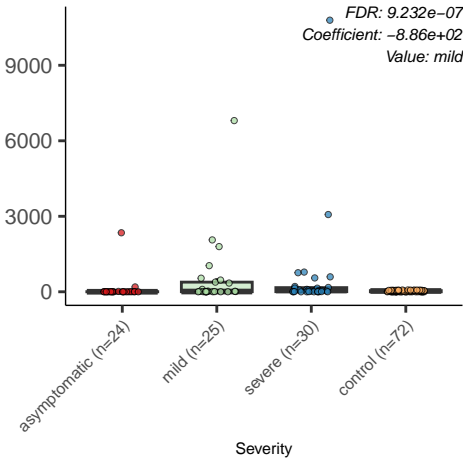

d\_Bacteria.p\_Firmicutes.c\_Tissierella.g\_Ezakiella.s\_Eza

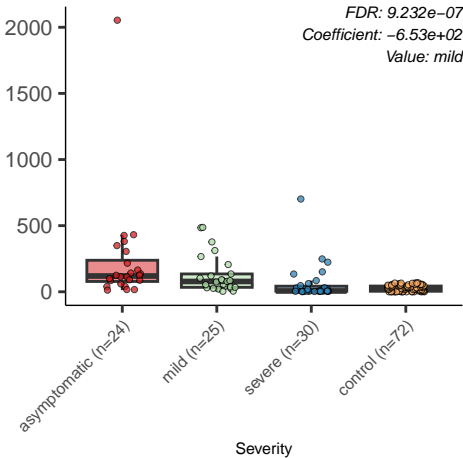

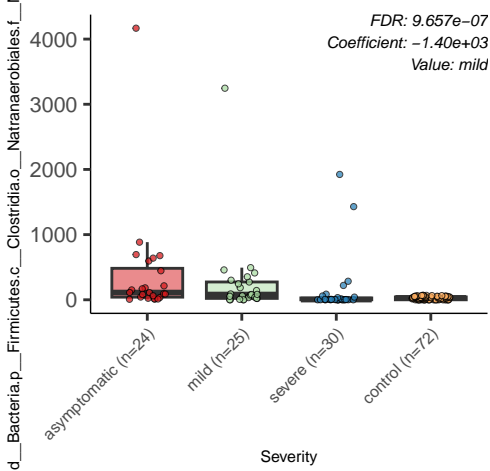

eria.p\_Firmicutes.c\_Clostridia.o\_Natranaerobiales.f\_Natranaer

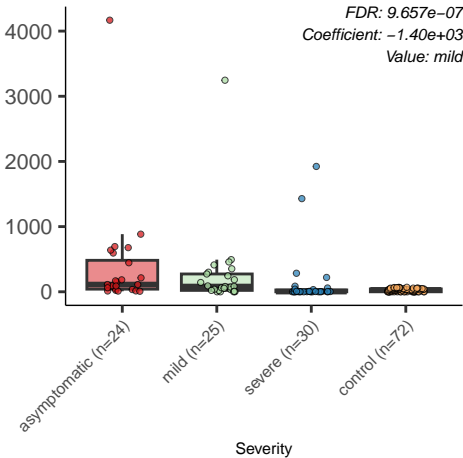



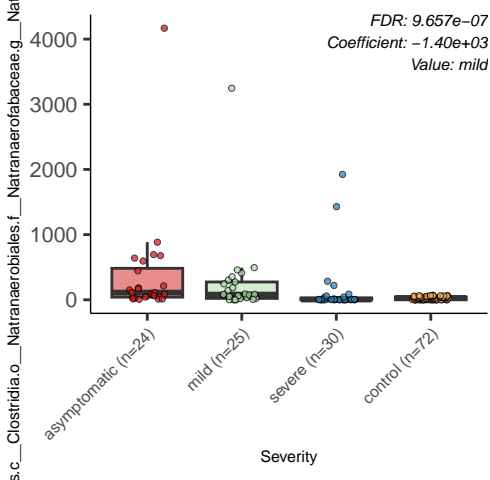

micutes.c\_Bacilli.o\_Lactobacillales.f\_Streptococcaceae.g\_Strep

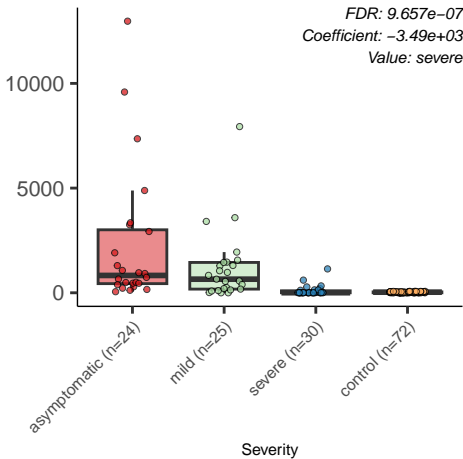

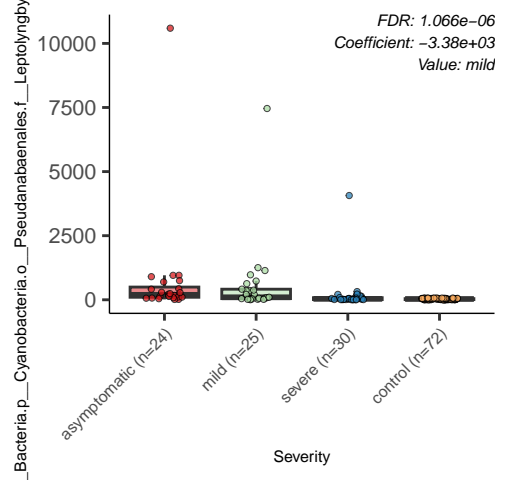

teria.p\_\_Proteobacteria.c\_\_Alphaproteobacteria.o\_\_Hyphomicrobia

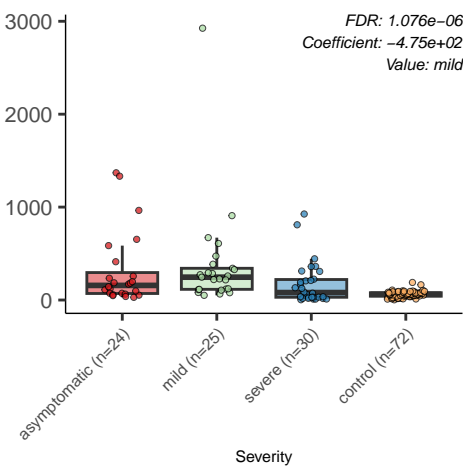

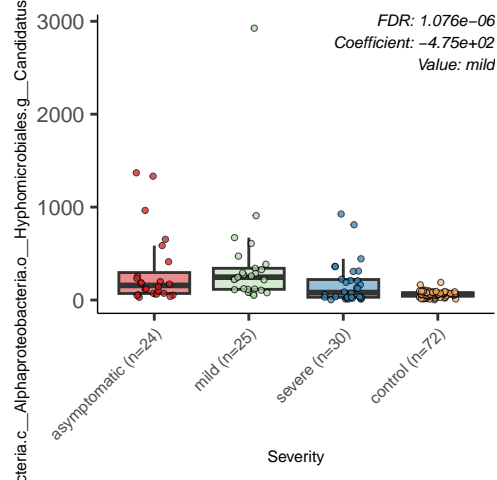

teria.p\_\_Proteobacteria.c\_\_Alphaproteobacteria.o\_\_Sphingomonad

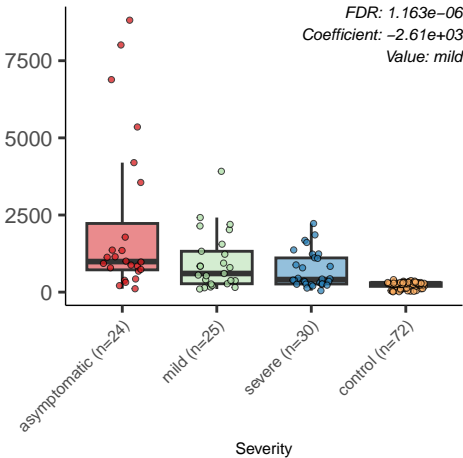

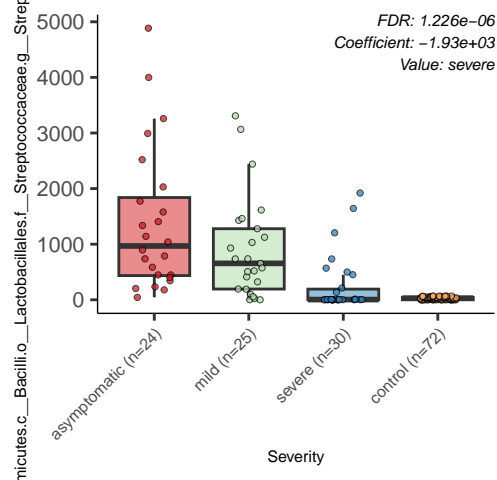

d\_Bacteria.p\_\_Planctomycetes.c\_\_Planctomycetia.o\_\_Plan

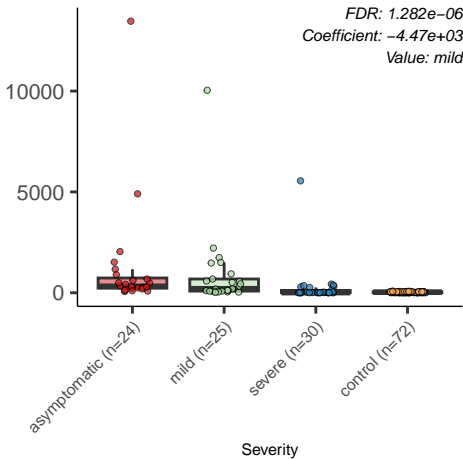



Bacteria.p\_\_Planctomycetes.c\_\_Planctomycetia.o\_\_Planctomycetia

FDR: 1.282e-06  
Coefficient: -4.47e+03  
Value: mild

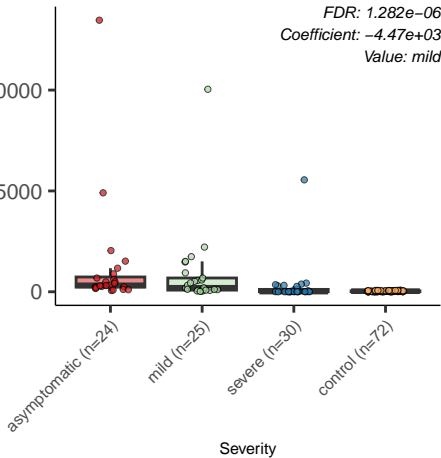

Firmicutes.c\_\_Clostridia.o\_\_Eubacteriales.f\_\_Lachnospiraceae.g

*FDR: 1.332e-06*  
*Coefficient: -1.69e+03*  
*Value: mild*

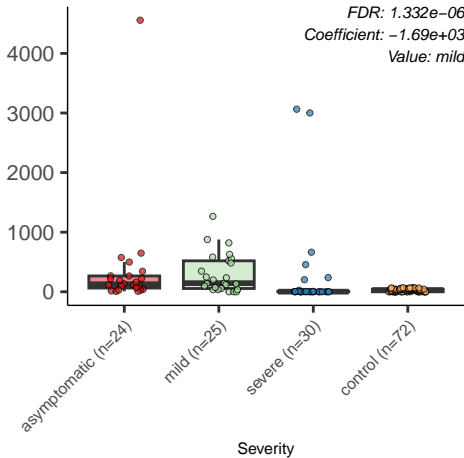

d\_Bacteria.p\_\_Proteobacteria.c\_\_Betaproteobacteria.o\_\_Burkholderia

7500  
5000  
2500  
0

FDR:  $1.382 \times 10^{-6}$   
Coefficient:  $-8.12 \times 10^2$   
Value: mild

asymptomatic (n=24)

mild (n=25)

severe (n=30)

control (n=72)

Severity

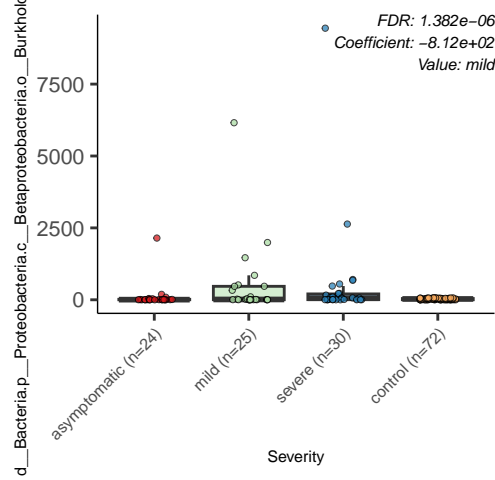

p\_\_Proteobacteria.c\_\_Betaproteobacteria.o\_\_Burkholderiales.g\_\_ld

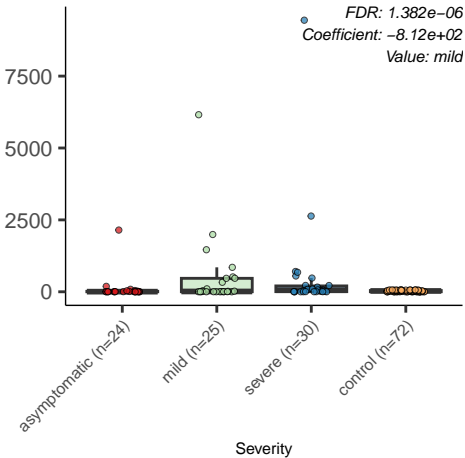

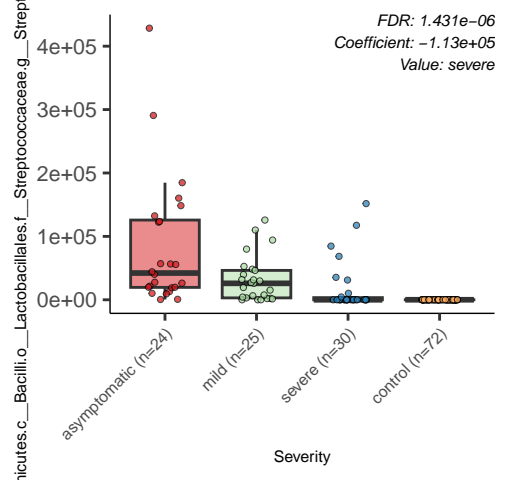

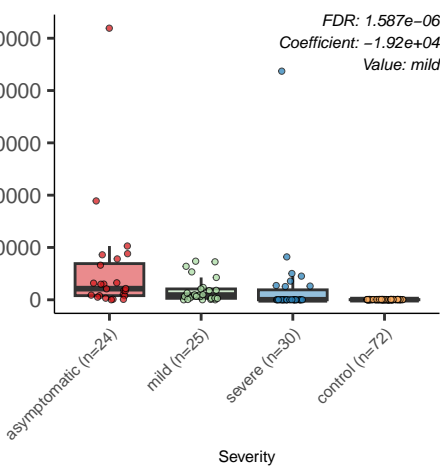

firmicutes.c\_\_Bacilli.o\_\_Lactobacillales.f\_\_Streptococcaceae.g\_\_Str

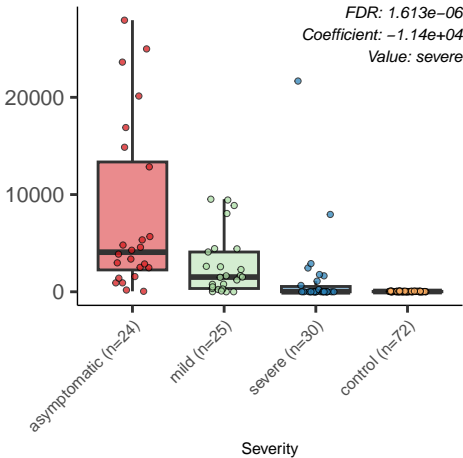

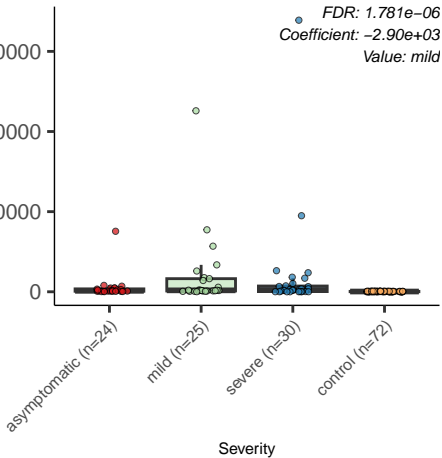



idetes.c\_\_Flavobacteriia.o\_\_Flavobacteriales.f\_\_Flavobacteriaceae.

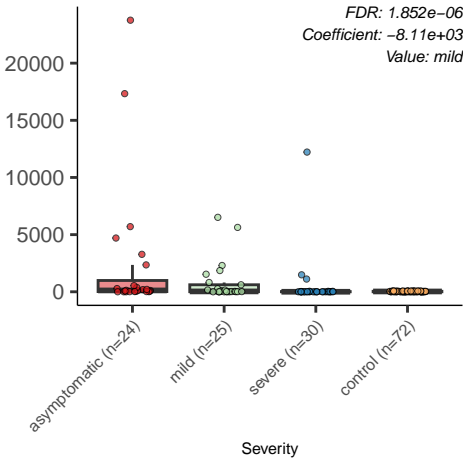

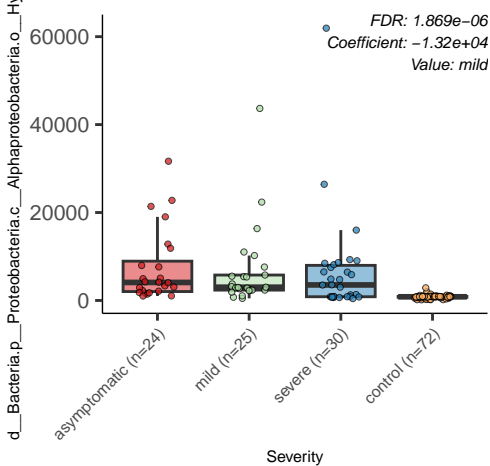

ia.p\_\_Verrucomicrobia.c\_\_Opitutae.o\_\_Puniceicoccales.f\_\_Puniceib

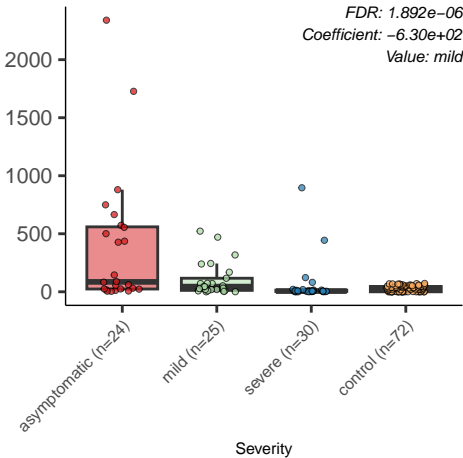

crobia.c\_\_Opitutae.o\_\_Puniceicoccales.f\_\_Puniceicoccaceae.g\_\_C

*FDR: 1.892e-06*  
*Coefficient: -6.30e+02*  
*Value: mild*

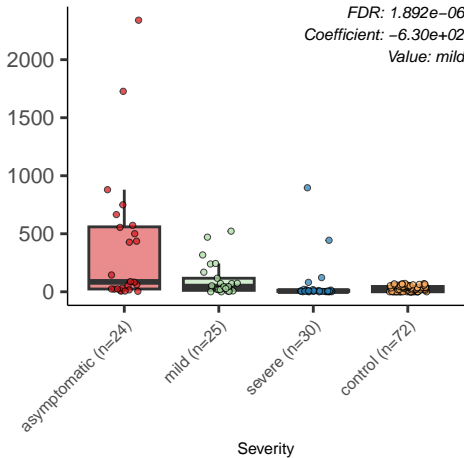

l\_Bacteria.p\_\_Proteobacteria.c\_\_Alphaproteobacteria.o\_\_Ricketts

FDR:  $1.940e-06$   
Coefficient:  $-3.06e+02$   
Value: mild

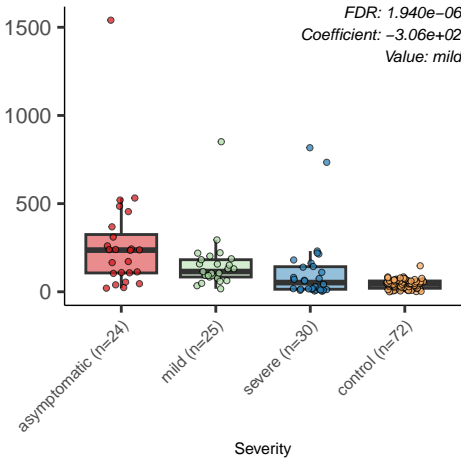

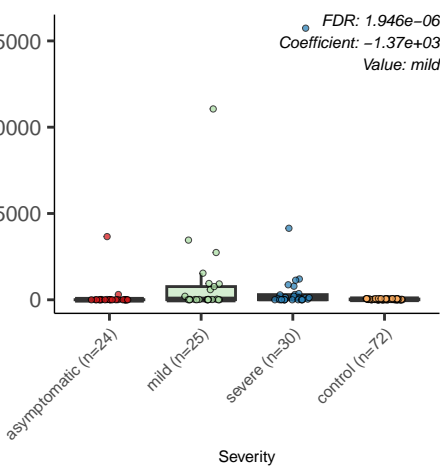

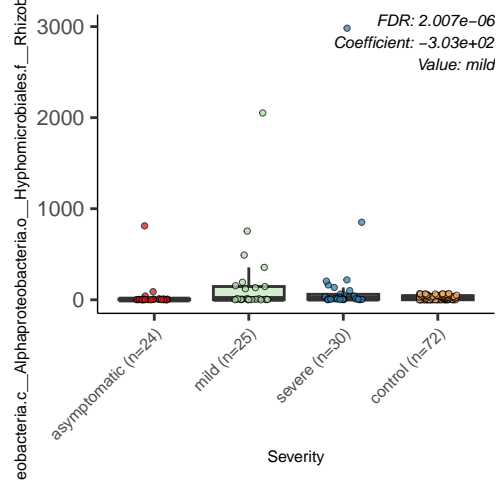

d\_Bacteria.p\_Bacteroidetes.o\_Bacteroidetes.Order.II.L...

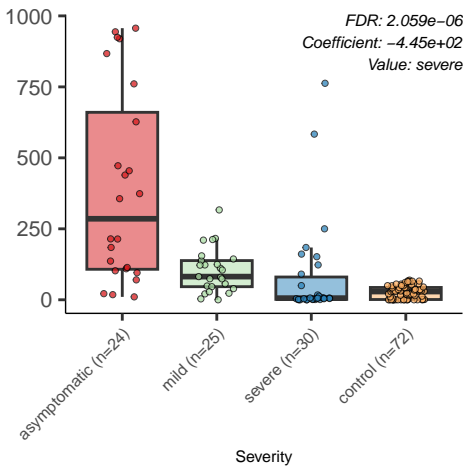



Bacteria.p\_Bacteroidetes.o\_Bacteroidetes.Order.II..Incertae.sed

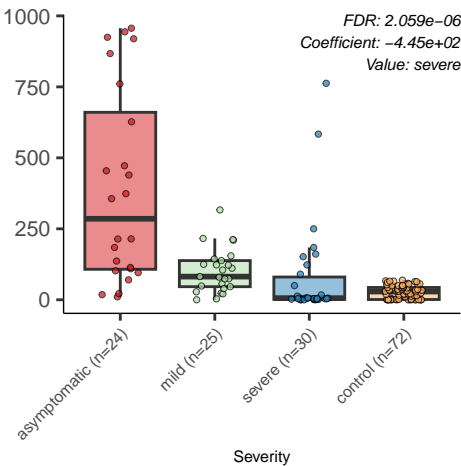

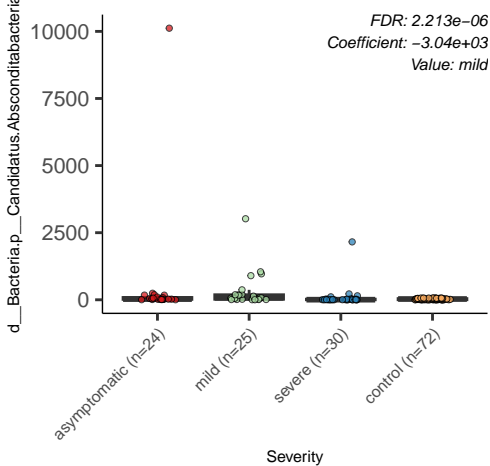

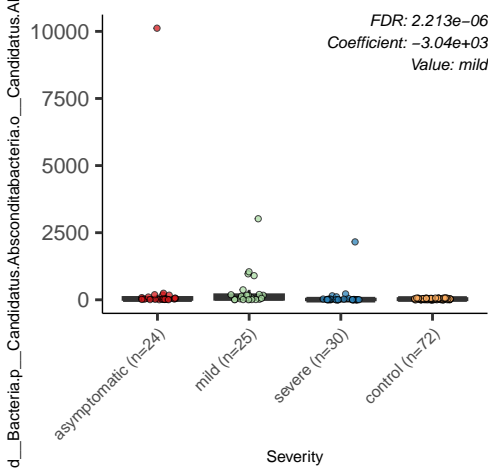



onditabacteria.o\_\_Candidatus.Absconditabacterales.f\_\_Candidatus.

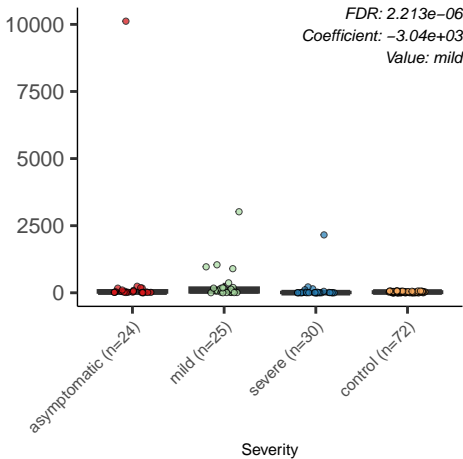



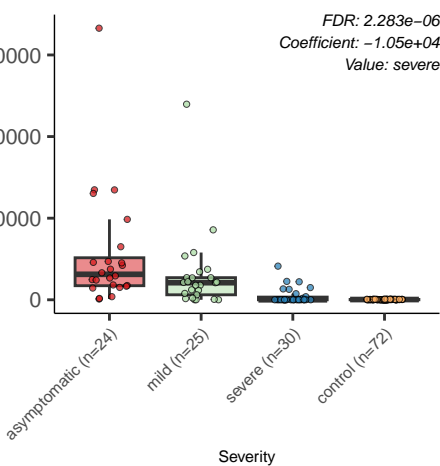

Cyanobacteria.o\_Pseudanabaenales.f\_Leptolyngbyaceae.g\_L

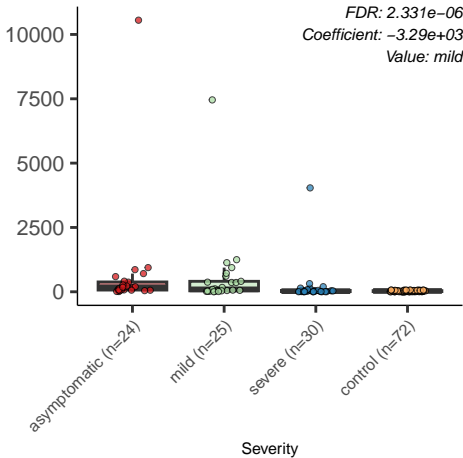



d\_Bacteria.p\_Bacteroidetes.o\_Candidatus.Sulfidib

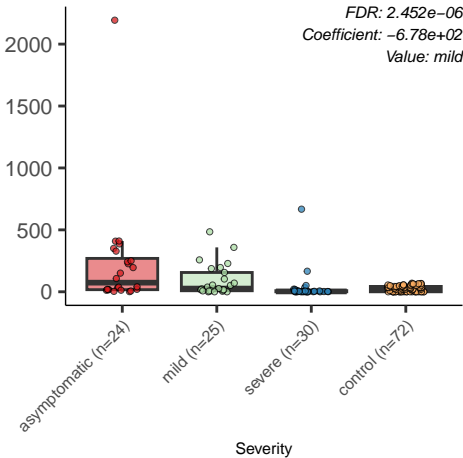

Bacteria.p\_\_Bacteroidetes.o\_\_Candidatus.Sulfidibacteriales.g\_\_Ca

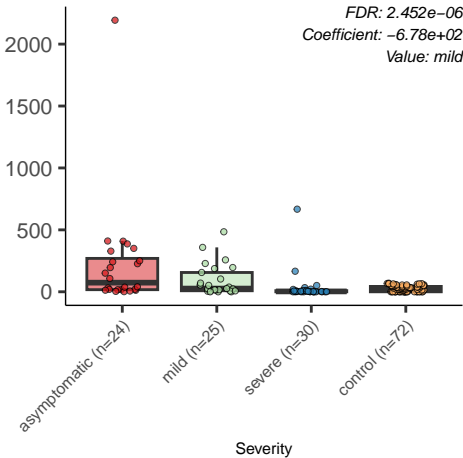

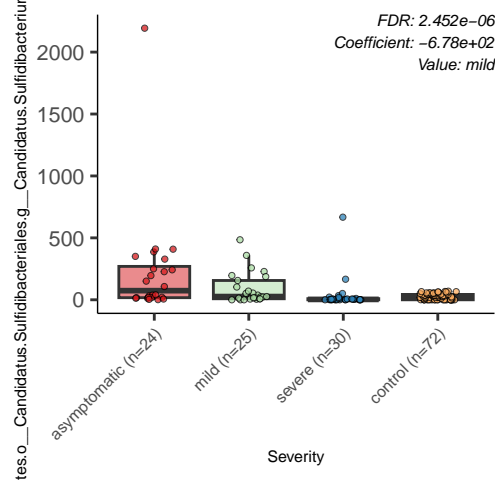

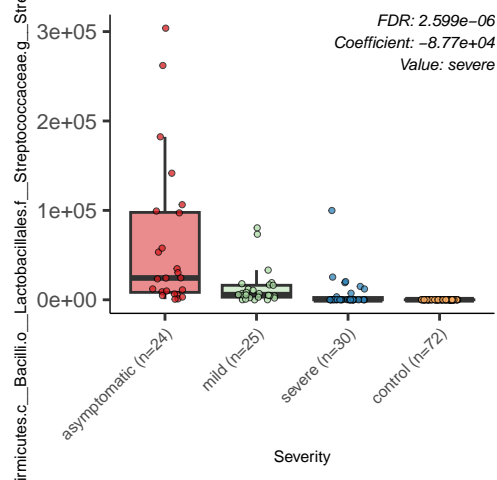

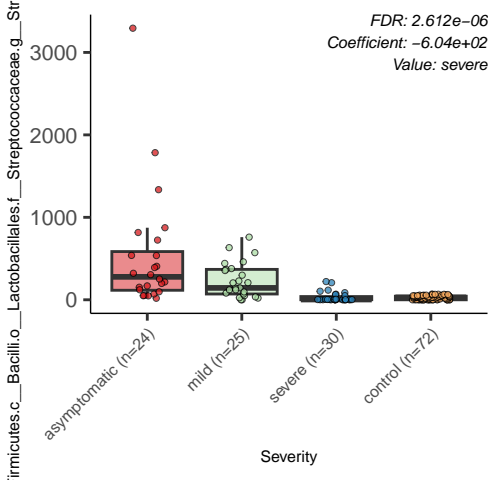



Bacteria.p\_Firmicutes.c\_Clostridia.o\_Eubacteriales.f\_Oscillosp

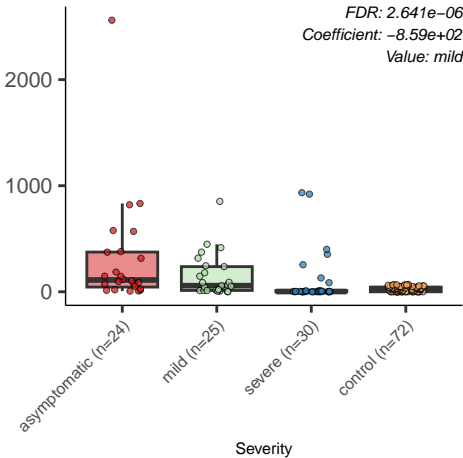

micutes.c\_\_Clostridia.o\_\_Eubacteriales.f\_\_Oscillospiraceae.g\_\_Ma

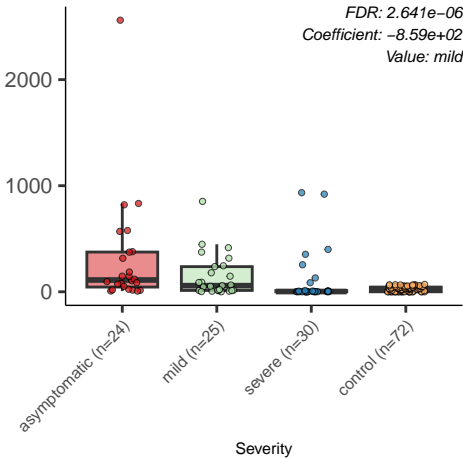



cutus.c\_\_Clostridia.o\_\_Eubacteriales.f\_\_Lachnospiraceae.g\_\_Anaer

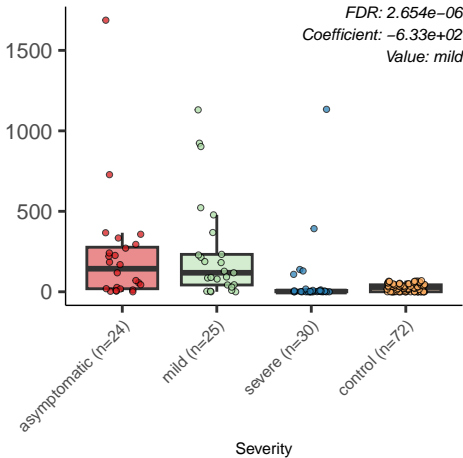

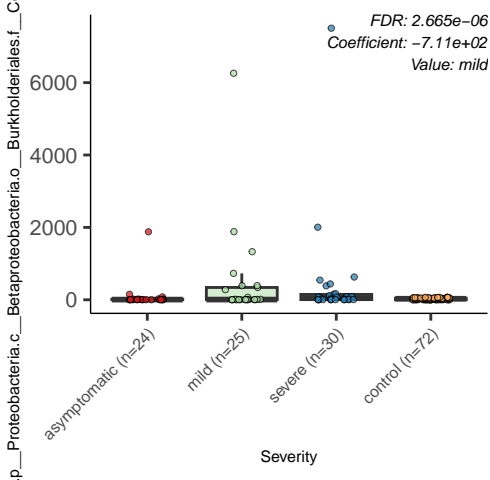

d\_Bacteria.p\_Firmicutes.c\_Clostridia.o\_Eubacteriales.g

FDR: 2.665e-06  
Coefficient: -1.08e+03  
Value: mild

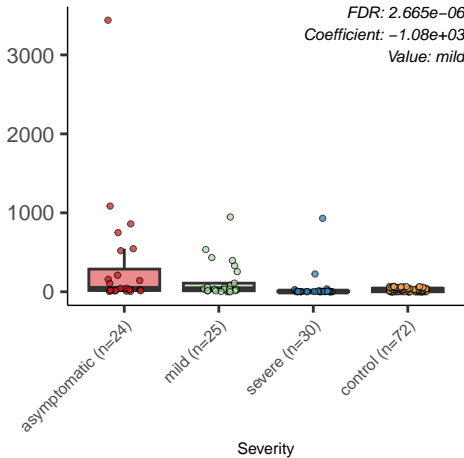

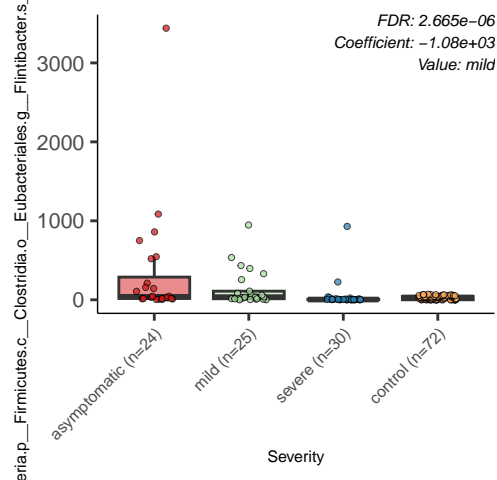

Bacteria.p\_\_Proteobacteria.c\_\_Betaproteobacteria.o\_\_Neisseriales

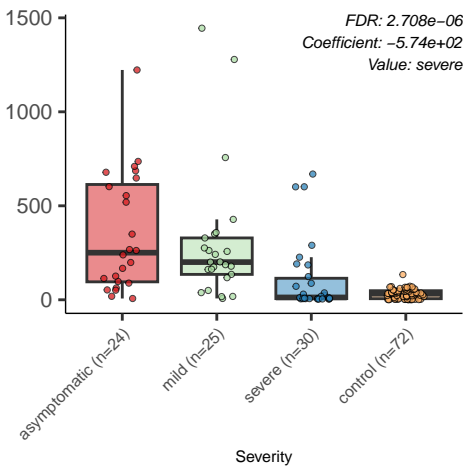

\_Bacteria.p\_Firmicutes.c\_Clostridia.o\_Eubacteriales.f\_Lachnos

FDR:  $2.763\text{e-}06$   
Coefficient:  $-7.86\text{e}+02$   
Value: mild

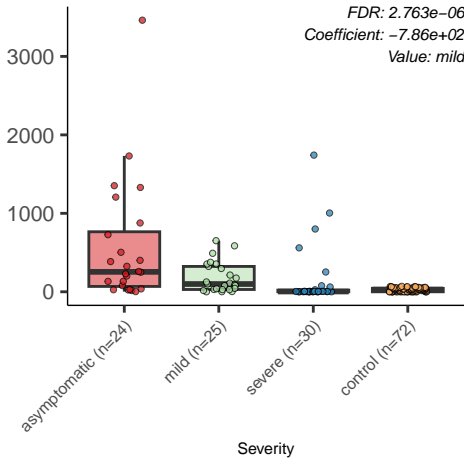

Firmicutes.c\_\_Clostridia.o\_\_Eubacteriales.f\_\_Lachnospiraceae.g

FDR:  $2.763 \times 10^{-6}$   
Coefficient:  $-7.86 \times 10^2$   
Value: mild

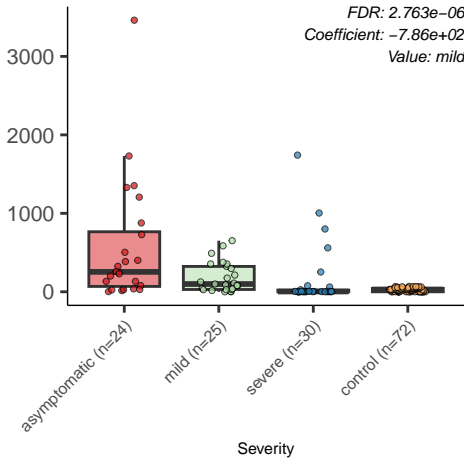

Tenericutes.c\_Mollicutes.o\_Mycoplasmales.f\_Mycoplasma

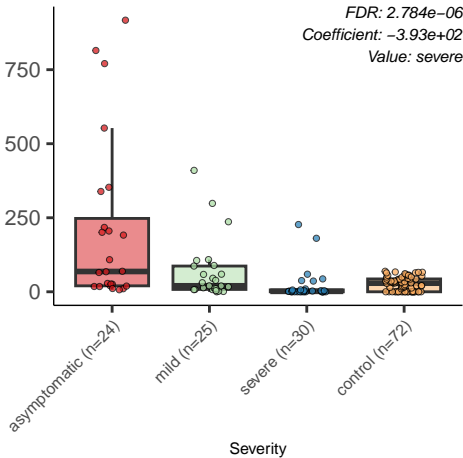



cutes.o\_\_Mycoplasmales.f\_\_Mycoplasmataceae.g\_\_Candidatus.H

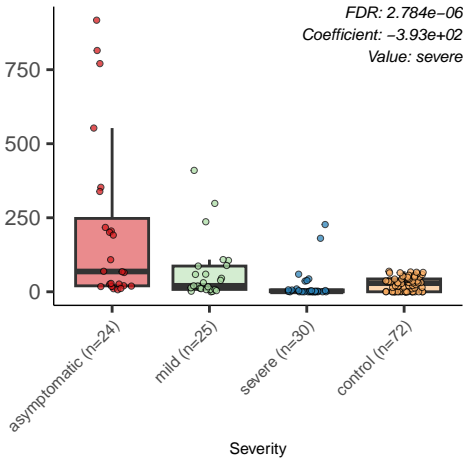

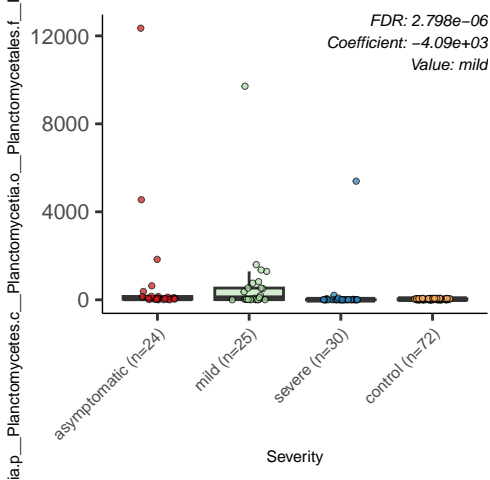

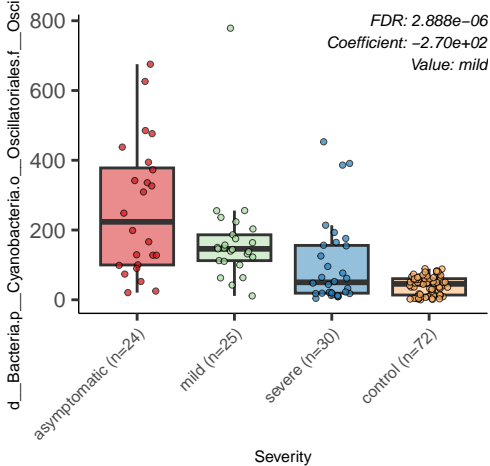

c\_\_Betaproteobacteria.o\_\_Burkholderiales.f\_\_Comamonadaceae.g

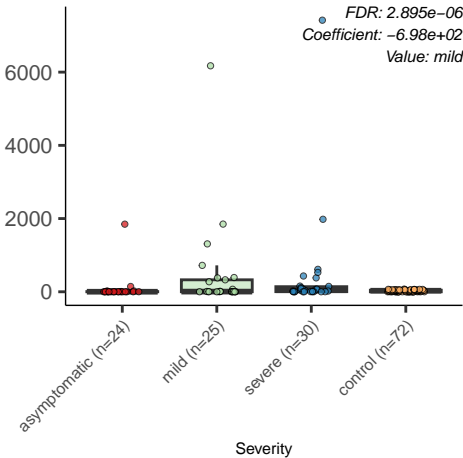

Firmicutes.c\_\_Bacilli.o\_\_Lactobacillales.f\_\_Lactobacillaceae.g\_\_La

FDR:  $3.027 \times 10^{-6}$   
Coefficient:  $-1.16 \times 10^3$   
Value: mild

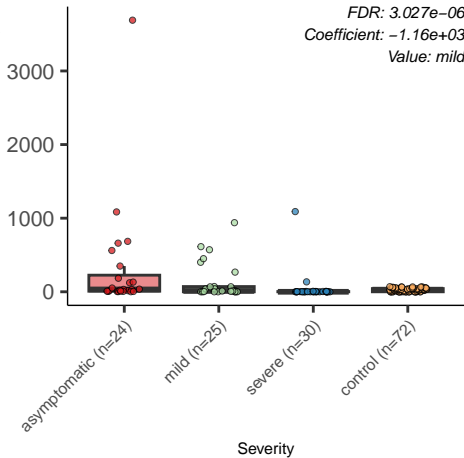

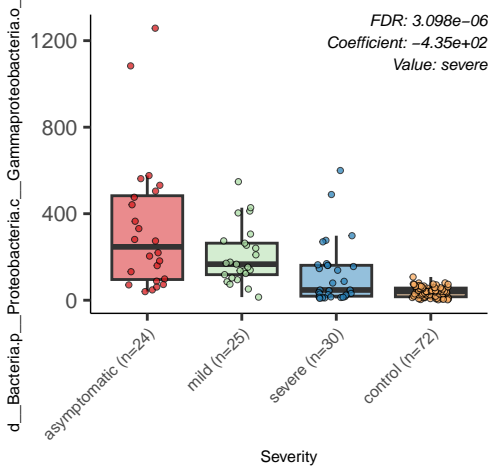

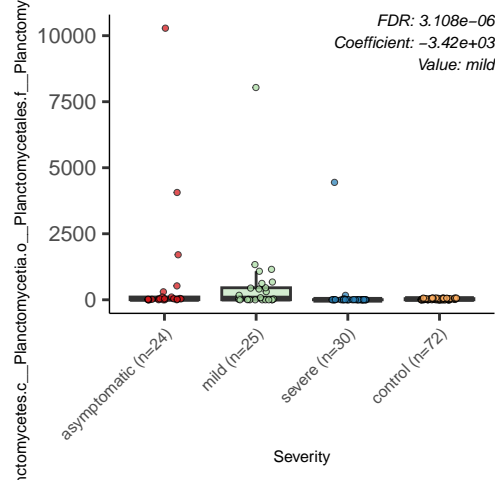

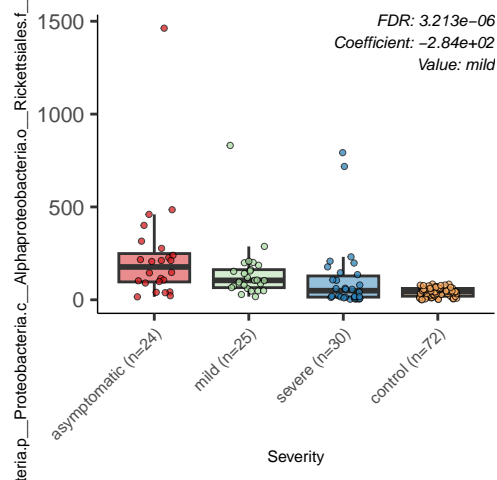



d\_Bacteria.p\_\_Proteobacteria.c\_\_Betaproteobacteria.o\_\_Burkholderia

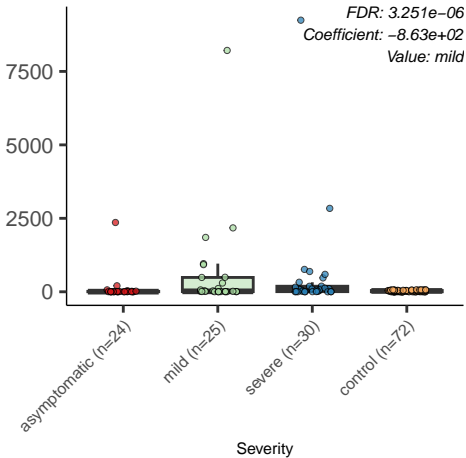

Proteobacteria.c\_\_Betaproteobacteria.o\_\_Burkholderiales.g\_\_Aqu

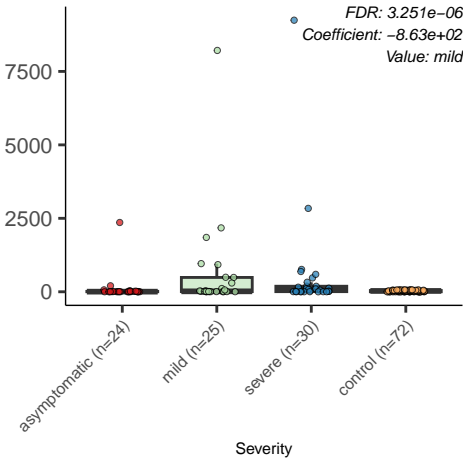

Flavobacteriales.f\_Fla  
Bacteroidetes.c\_Flavobacteriia.o\_Flavobacteriales.f\_Fla  
Bacteroidetes.c\_Flavobacteriia.o\_Flavobacteriales.f\_Fla

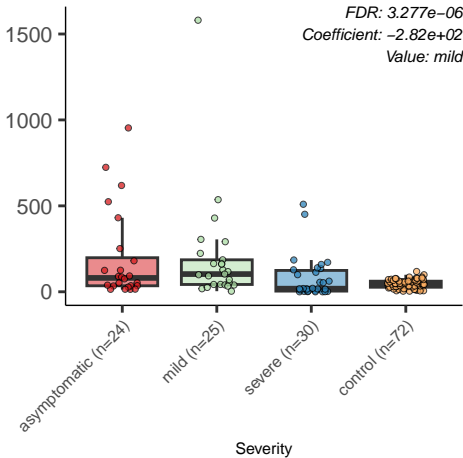

Bacteroidetes.c\_Flavobacteriia.o\_Flavobacteriales.f\_Flavobacter

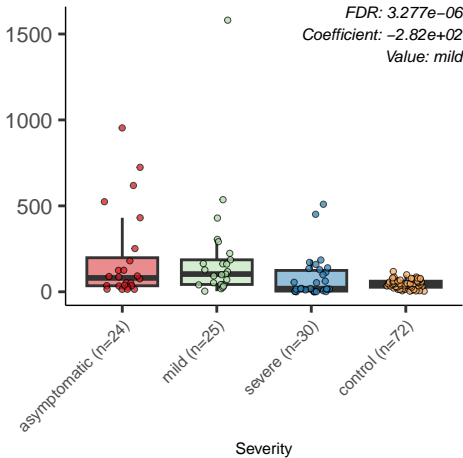

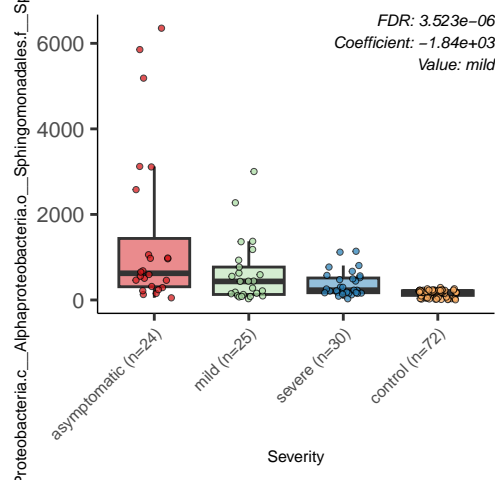

d\_\_Bacteria.p\_\_Proteobacteria.c\_\_Alphaproteobac

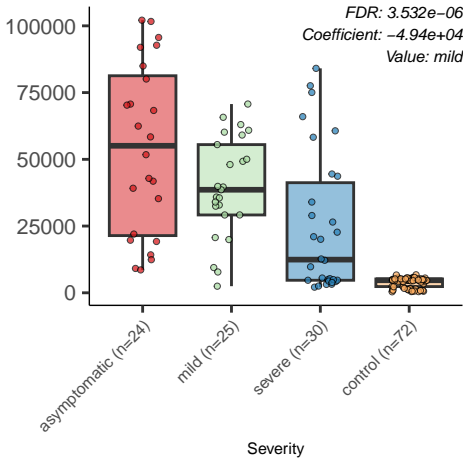

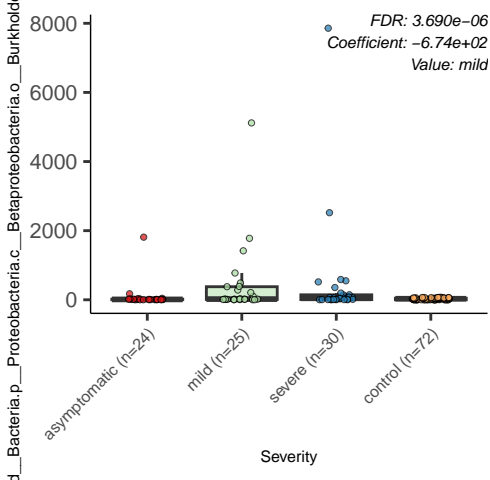

micutes.c\_\_Bacilli.o\_\_Lactobacillales.f\_\_Streptococcaceae.g\_\_Strep

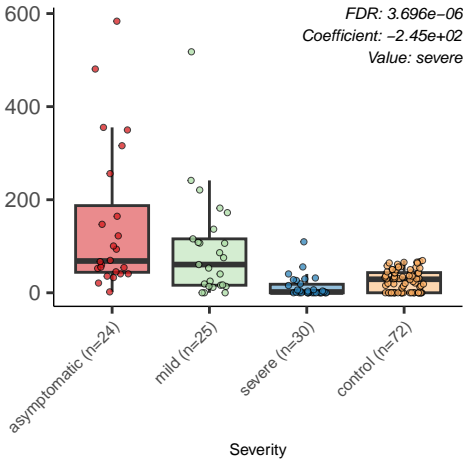



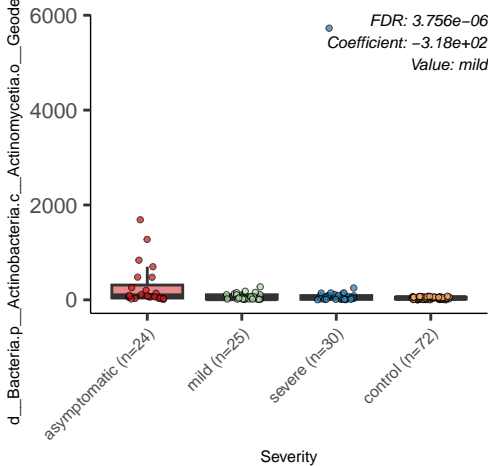

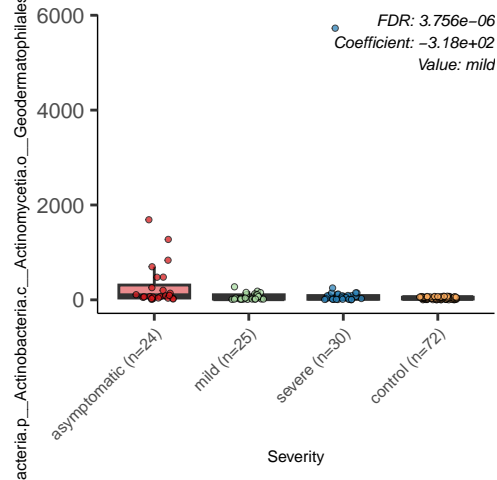

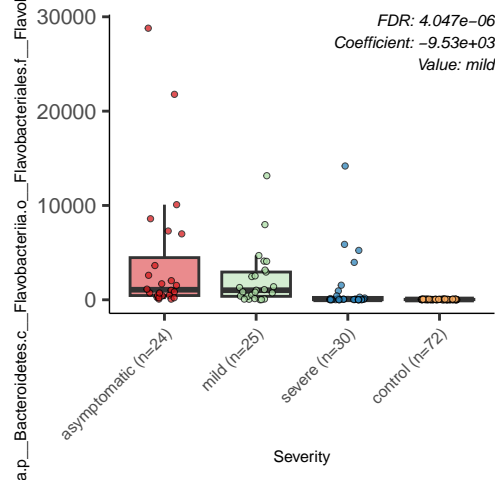

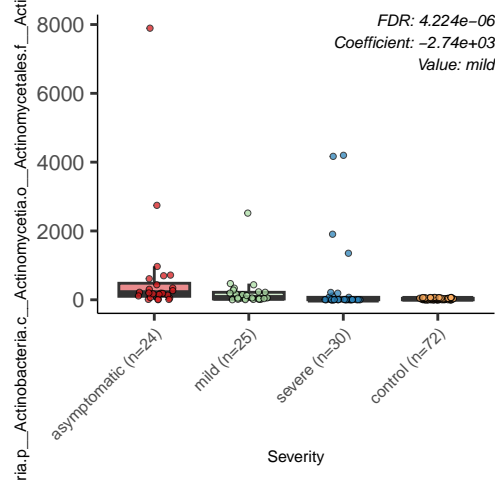

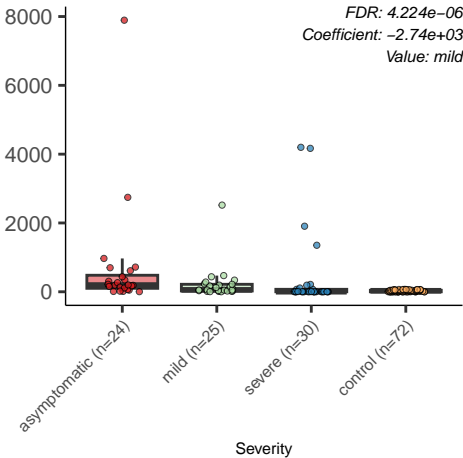

Bacteria.p\_\_Firmicutes.c\_\_Tissierellia.o\_\_Tissierellales.f\_\_Peptonip

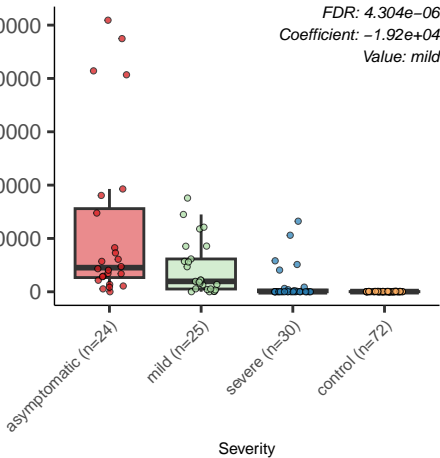

Firmicutes.c\_\_Tissierellia.o\_\_Tissierellales.f\_\_Peptoniphilaceae.g

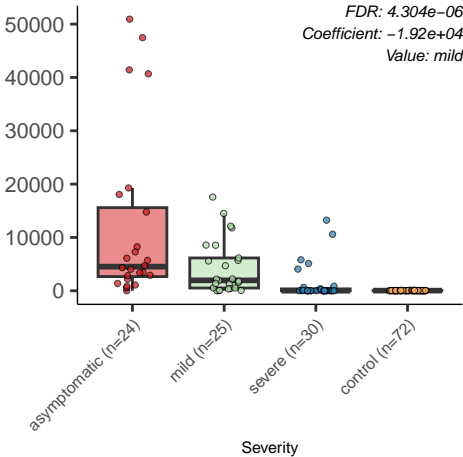

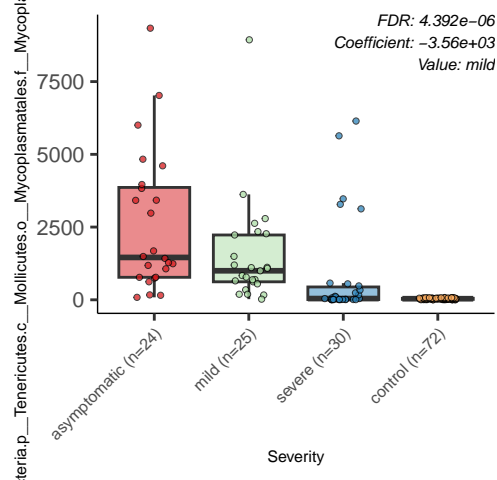



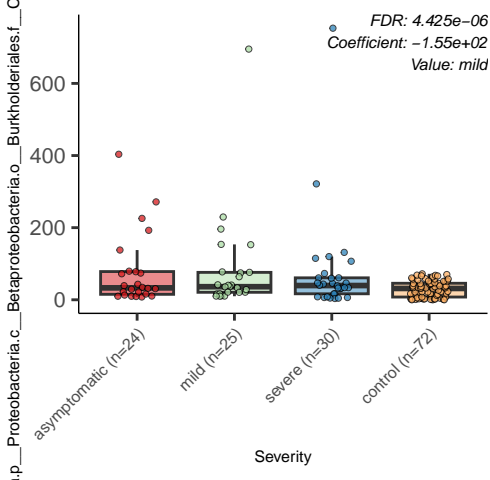

d\_Bacteria.p\_Cyanobacteria.o\_Pseudanabaen

FDR:  $4.500e-06$   
Coefficient:  $-3.80e+03$   
Value: mild

10000

5000

0

asymptomatic (n=24)

mild (n=25)

severe (n=30)

control (n=72)

Severity

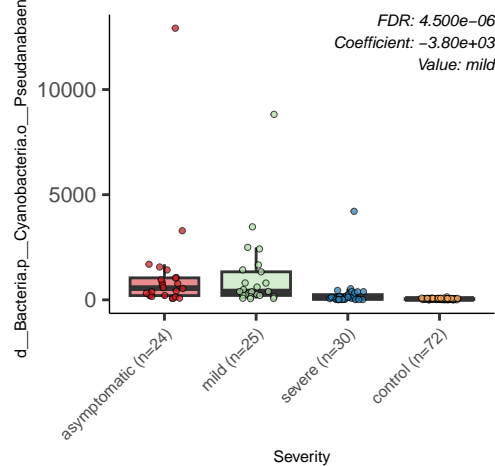

cteria.p\_\_Proteobacteria.c\_\_Deltaproteobacteria.o\_\_Desulfovibrion

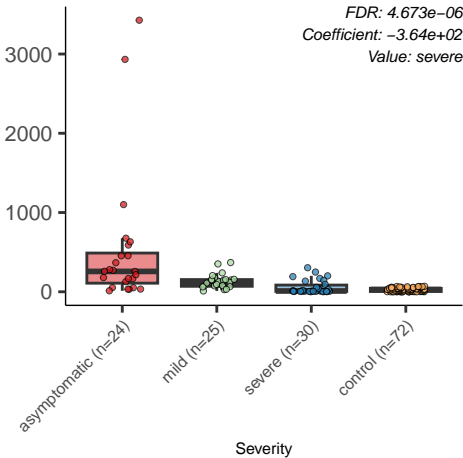

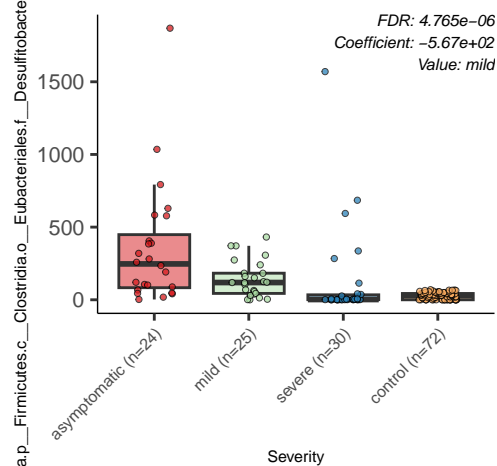

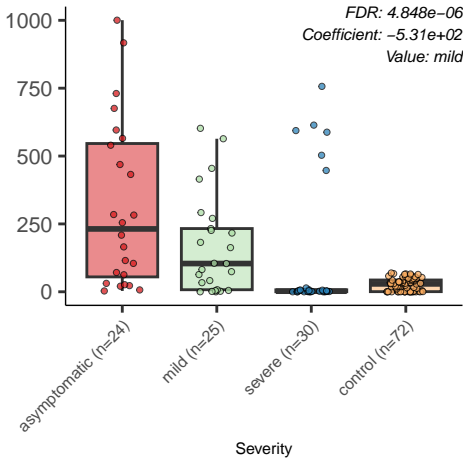

Tenericutes.c\_Mollicutes.o\_Mycoplasmales.f\_Mycoplasma

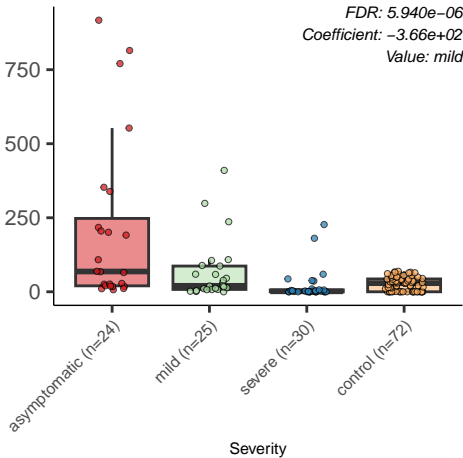

cutes.o\_\_Mycoplasmales.f\_\_Mycoplasmataceae.g\_\_Candidatus.H

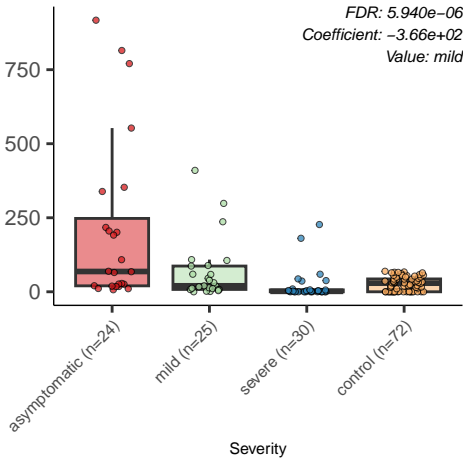

Firmicutes.c\_Clostridia.o\_Eubacteriales.f\_Clostridiaceae.g\_C

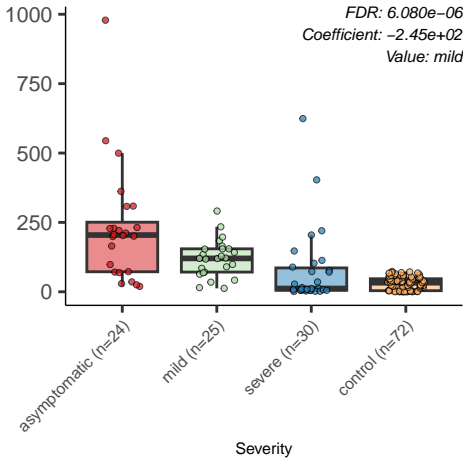



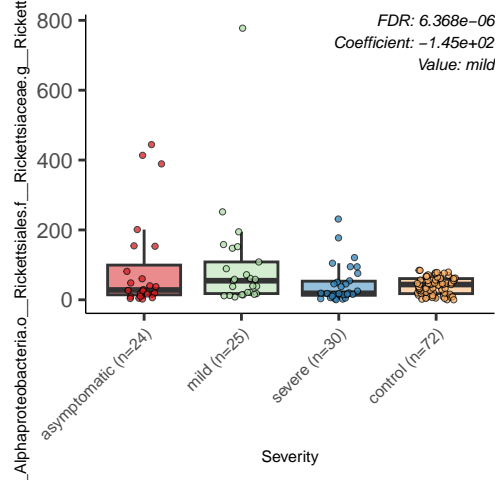

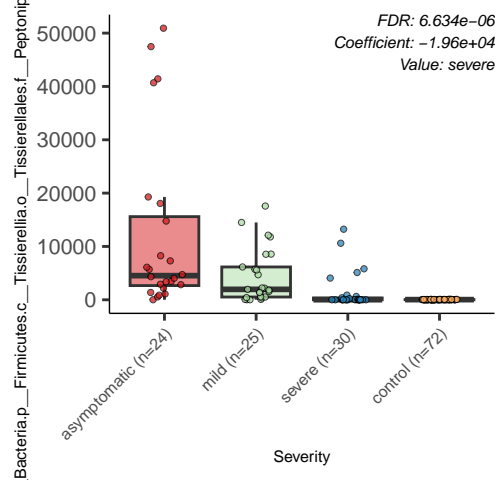

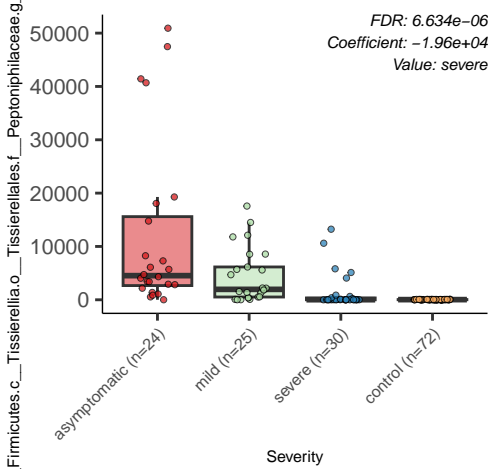

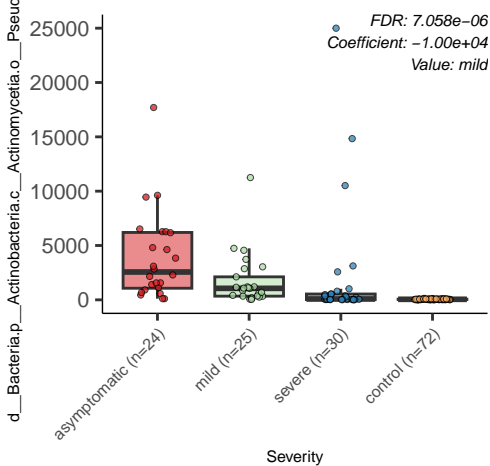

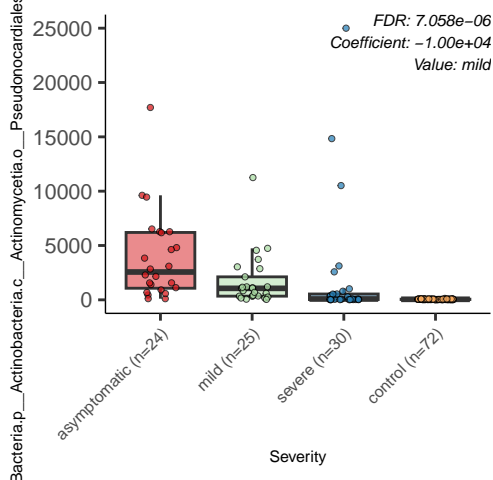

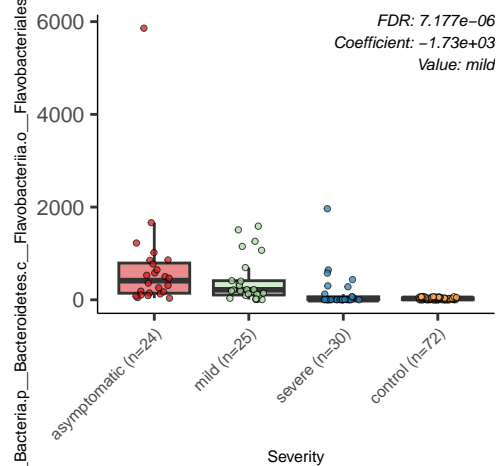

a.p.\_Bacteroidetes.c.\_Flavobacteriia.o.\_Flavobacteriales.f.\_Blatta

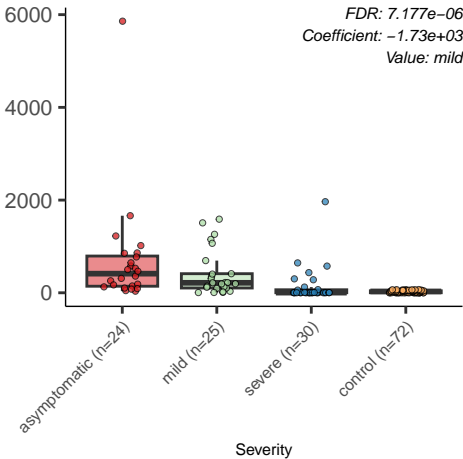

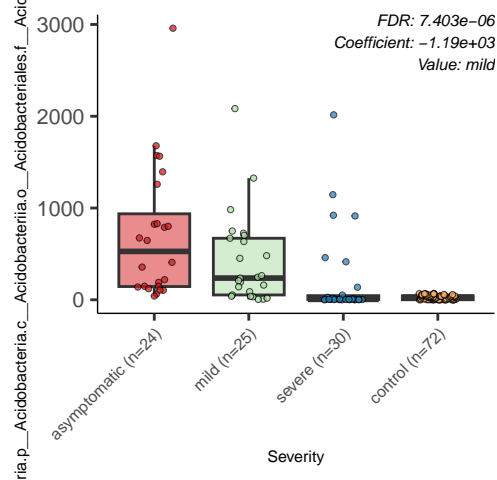



oacteria.c\_Acidobacteriia.o\_Acidobacteriales.f\_Acidobacteriaceae

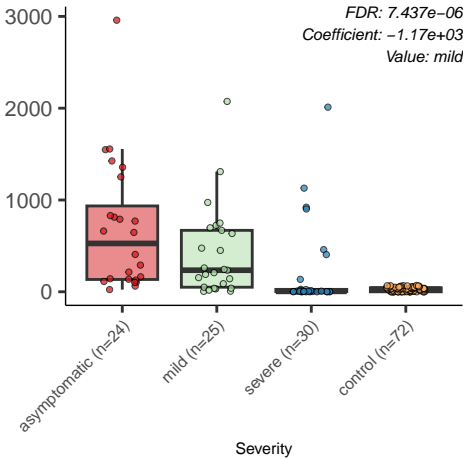

micutes.c\_\_Bacilli.o\_\_Lactobacillales.f\_\_Streptococcaceae.g\_\_Stre

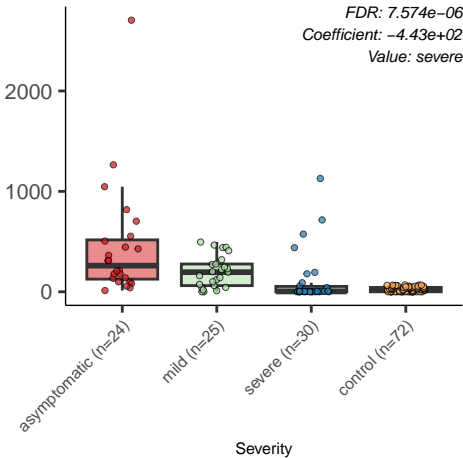

d\_\_Bacteria.p\_\_Cyanobacteria.o\_\_Synechococceae

FDR:  $7.716 \times 10^{-6}$   
Coefficient:  $-1.41 \times 10^3$   
Value: mild

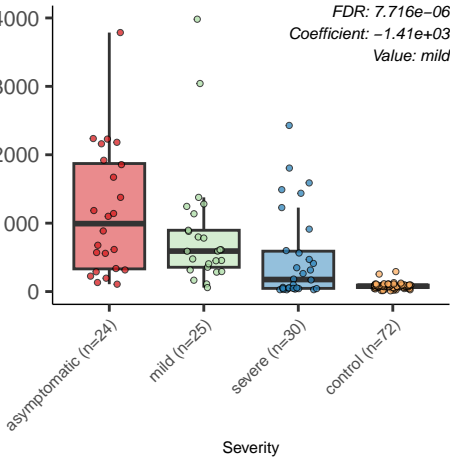

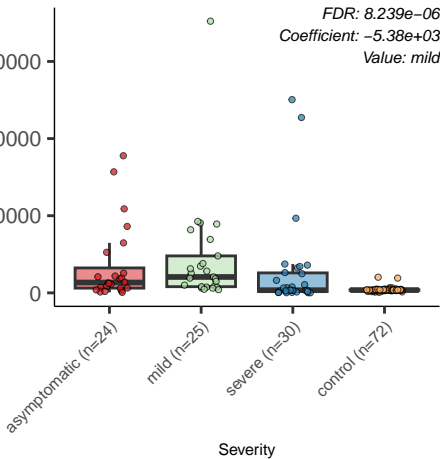

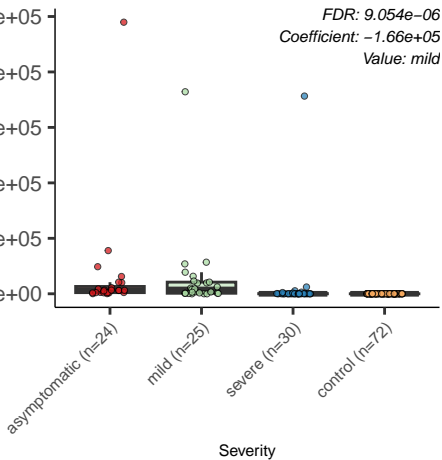

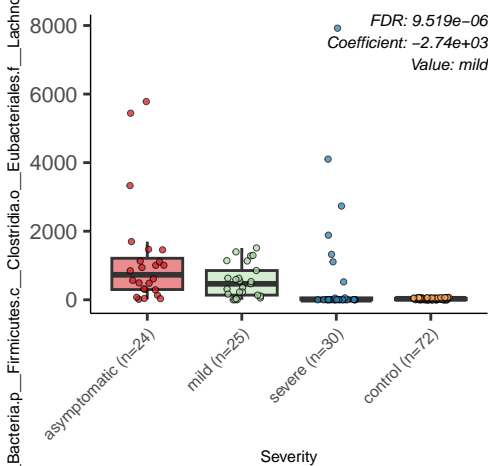

p\_Firmicutes.c\_\_Clostridia.o\_\_Eubacteriales.f\_\_Lachnospiraceae

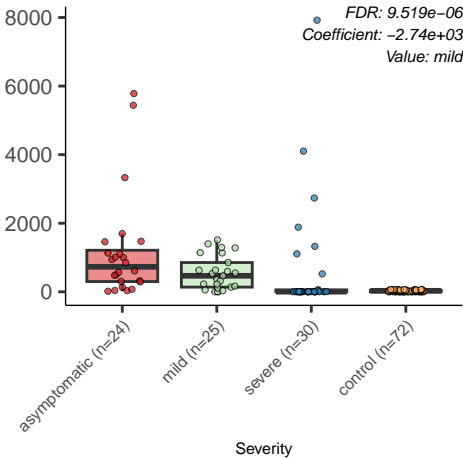

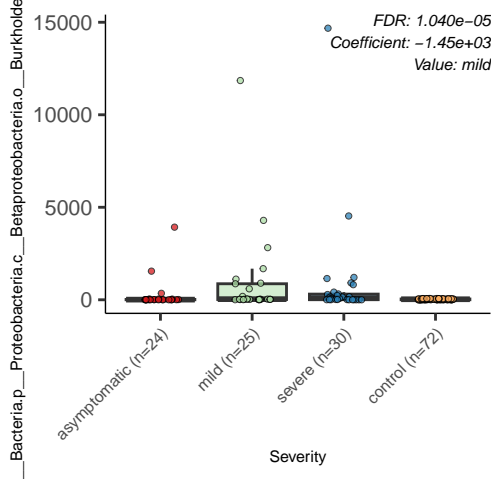



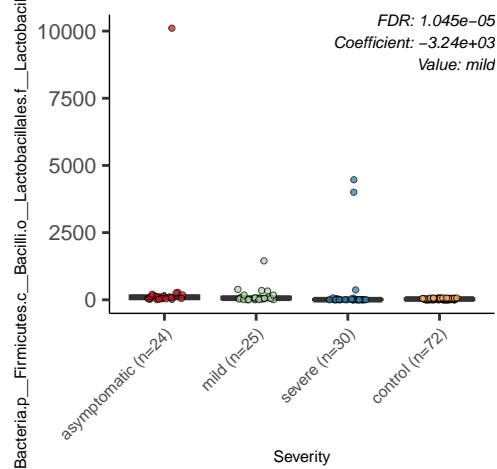

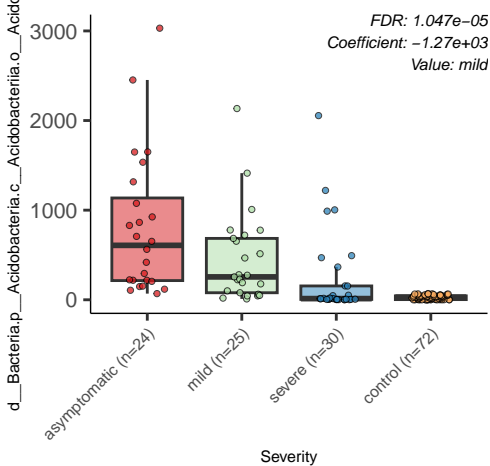

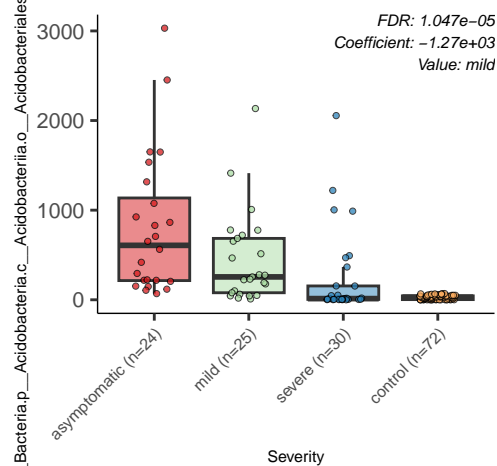

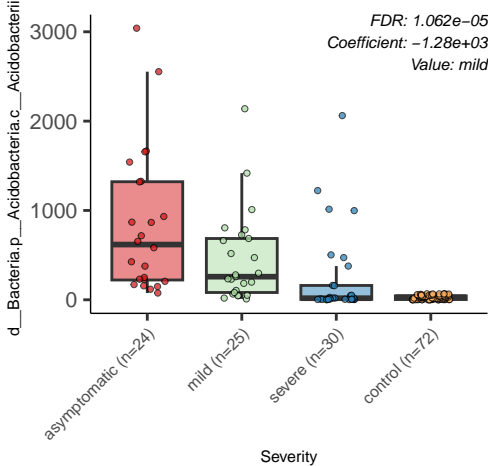

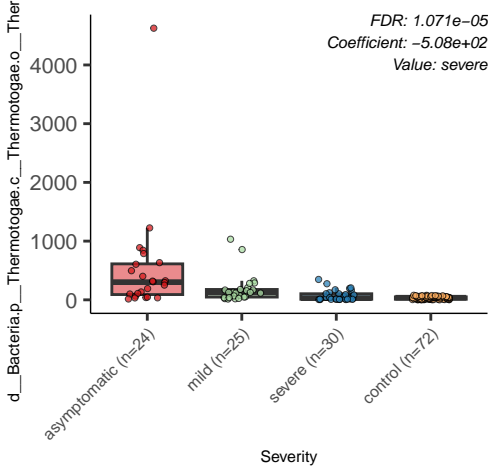

a.p.\_Proteobacteria.c.\_Alphaproteobacteria.o.\_Rickettsiales.f.\_An

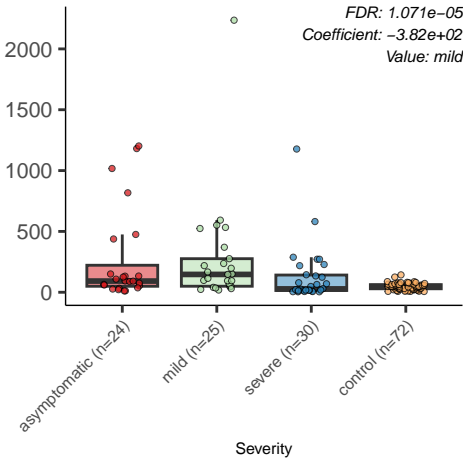

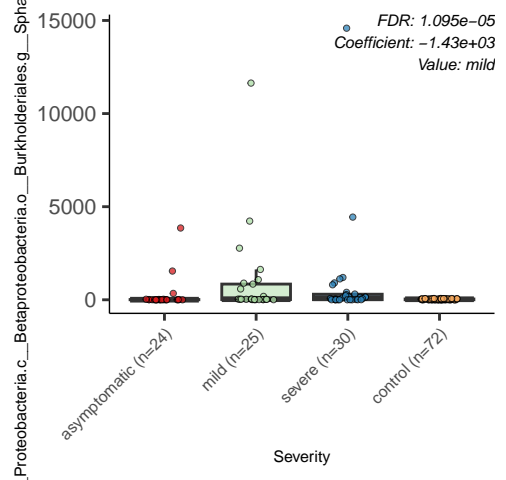

d\_Bacteria.p\_Firmicutes.c\_Clostridia.o\_Halanae

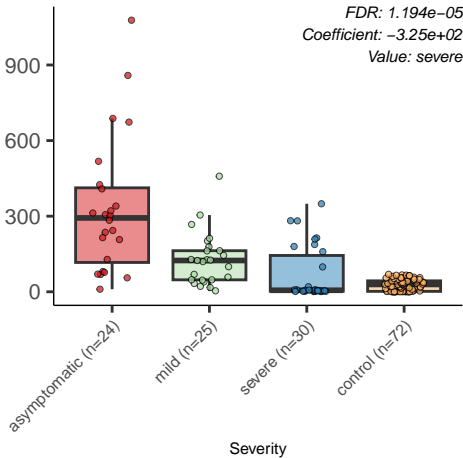



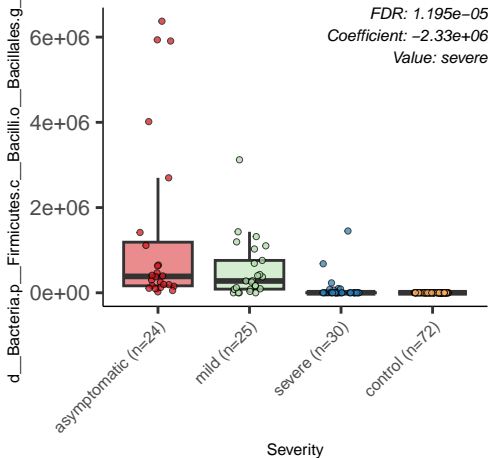

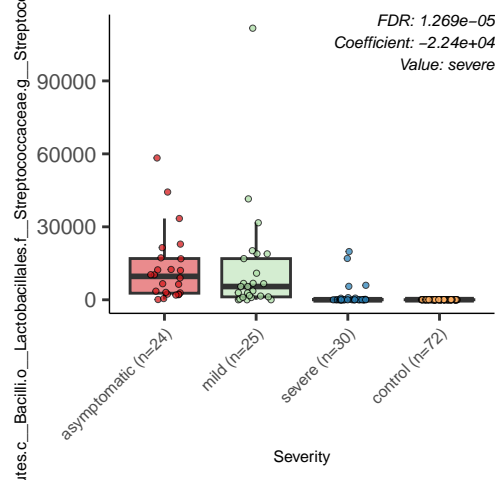

micutes.c\_\_Bacilli.o\_\_Lactobacillales.f\_\_Streptococcaceae.g\_\_Strep

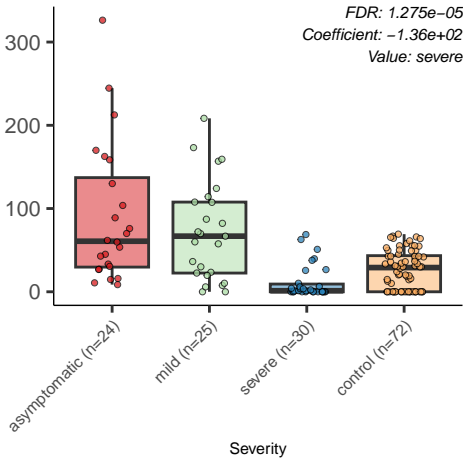

micutes.c\_\_Bacilli.o\_\_Lactobacillales.f\_\_Streptococcaceae.g\_\_Stre

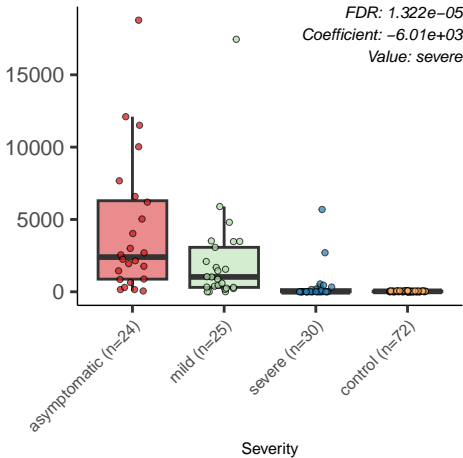

Firmicutes.c\_\_Bacilli.o\_\_Lactobacillales.f\_\_Streptococcaceae.g\_\_S

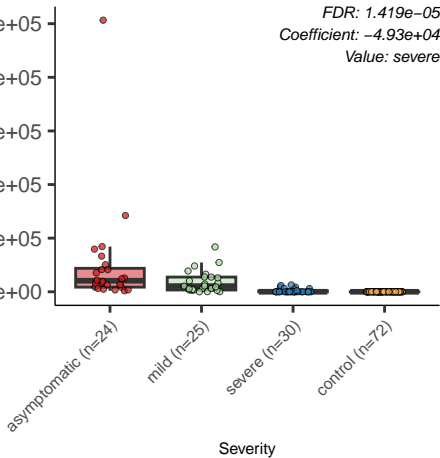

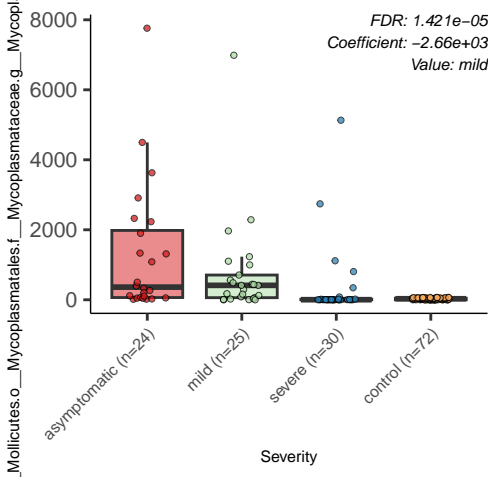

acteria.p\_\_Proteobacteria.c\_\_Alphaproteobacteria.o\_\_Rhodobacter

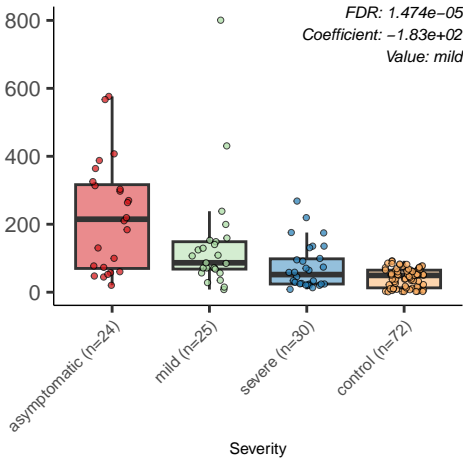

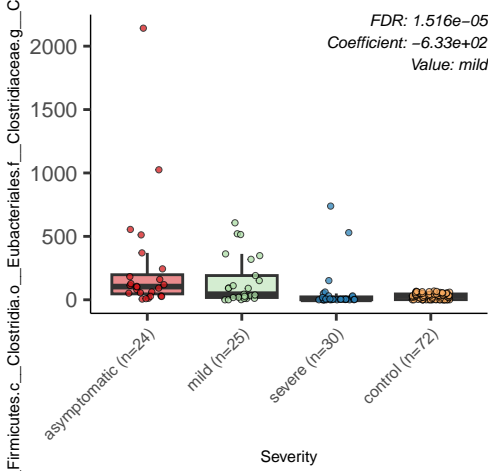



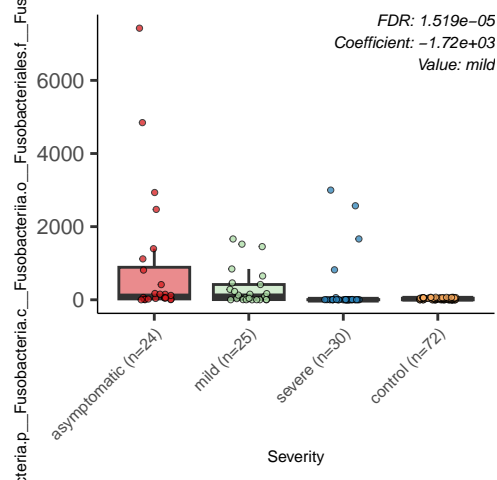

sobacteria.c\_\_Fusobacteriia.o\_\_Fusobacteriales.f\_\_Fusobacteriaceae

FDR:  $1.519\text{e-}05$   
Coefficient:  $-1.72\text{e}+03$   
Value: mild

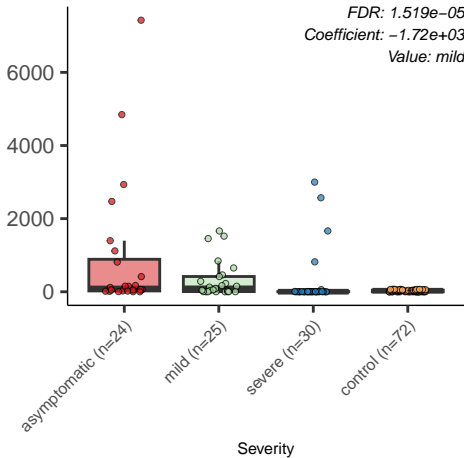

Bacteria.p\_\_Bacteroidetes.c\_\_Bacteroidia.o\_\_Bacteroidales.f\_\_Tanr

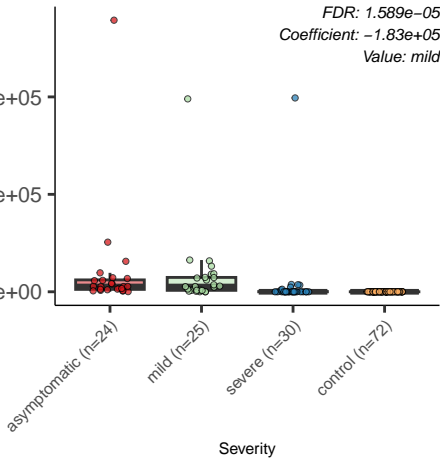

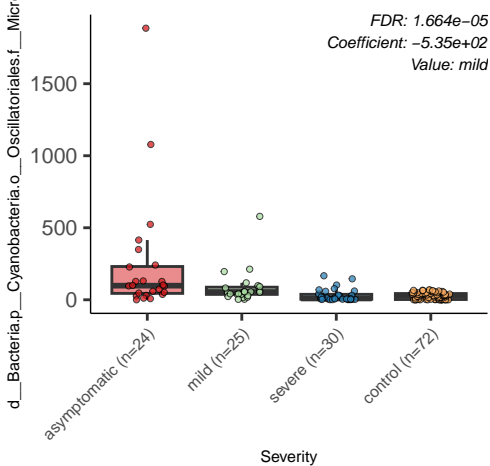

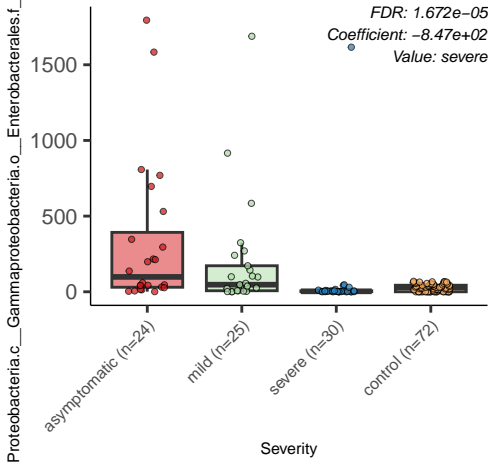

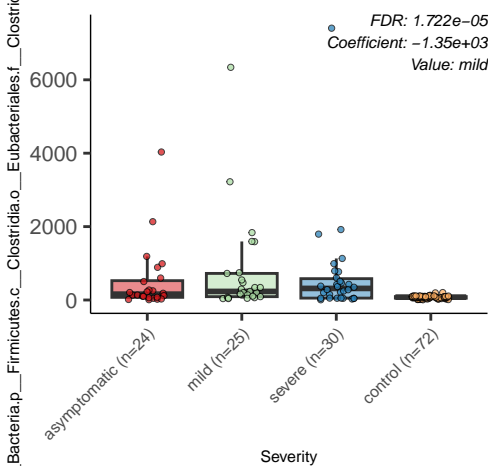

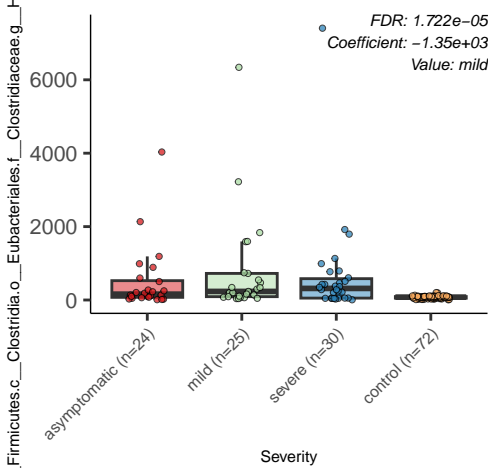

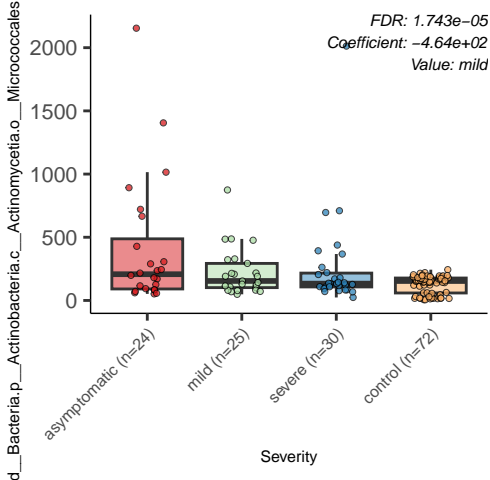



ria.p\_Actinobacteria.c\_Actinomycetia.o\_Micrococcales.f\_Brevib

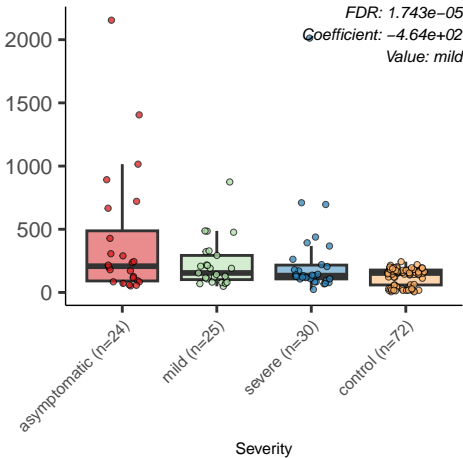

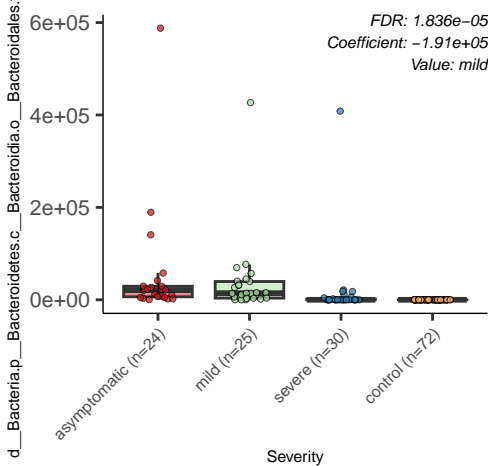

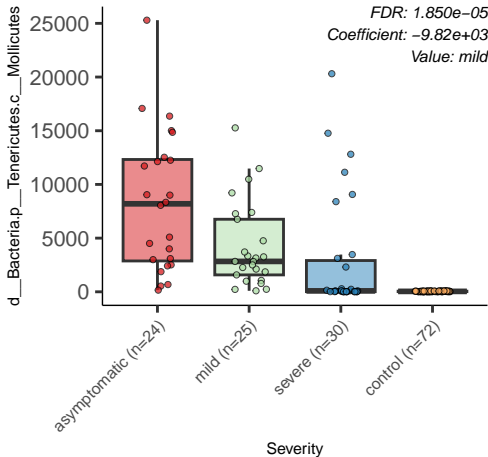

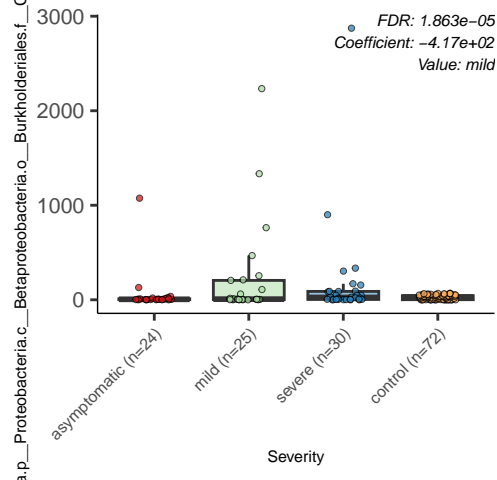

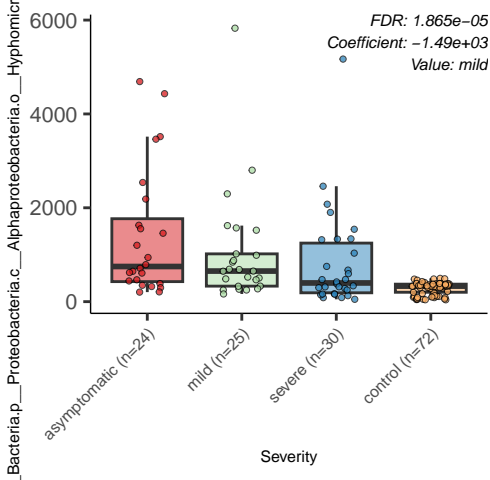

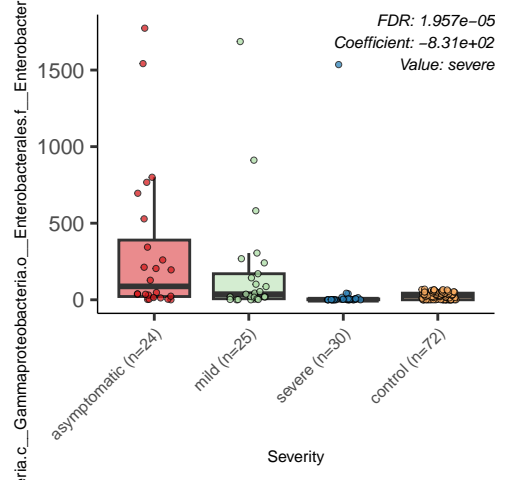

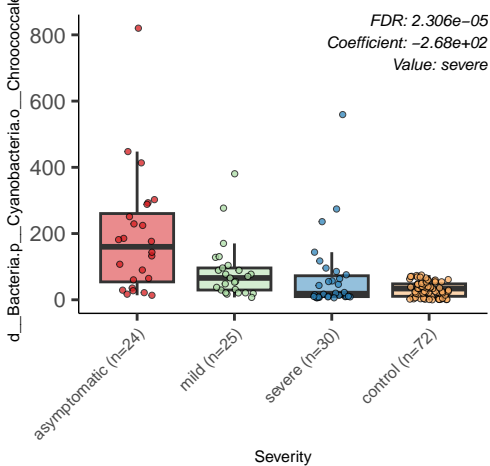

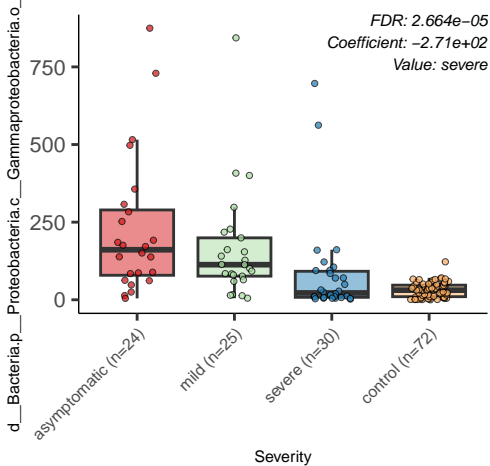



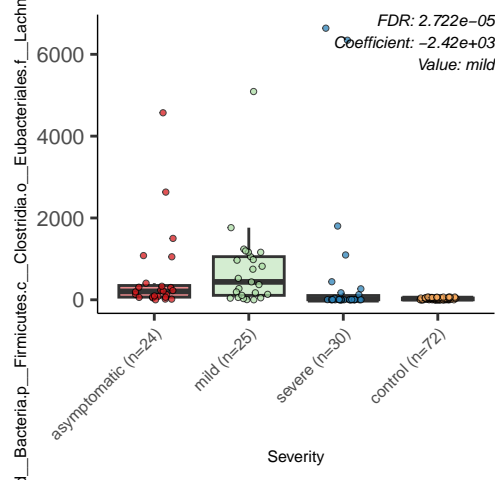

g\_\_Firmicutes.c\_\_Clostridia.o\_\_Eubacteriales.f\_\_Lachnospiraceae.g

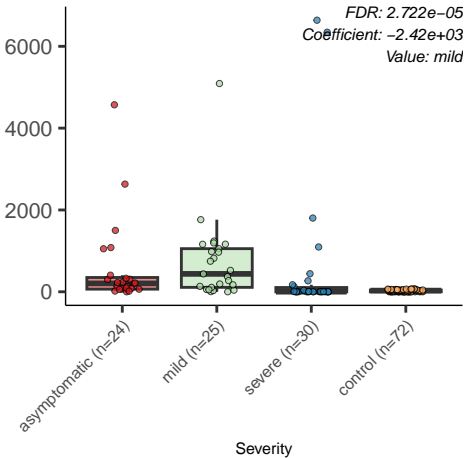

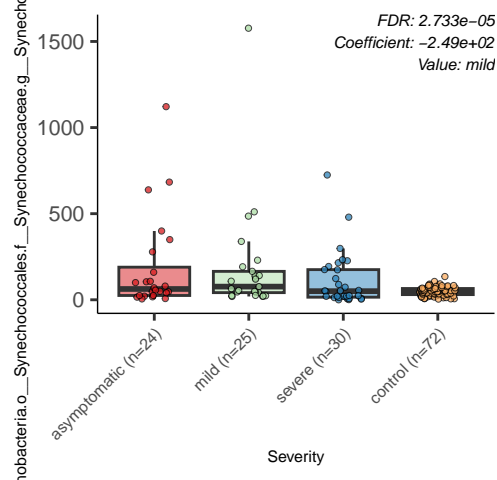

d\_Bacteria.p\_Bacteroidetes.c\_Bacteroidia.o\_Bacteroidales

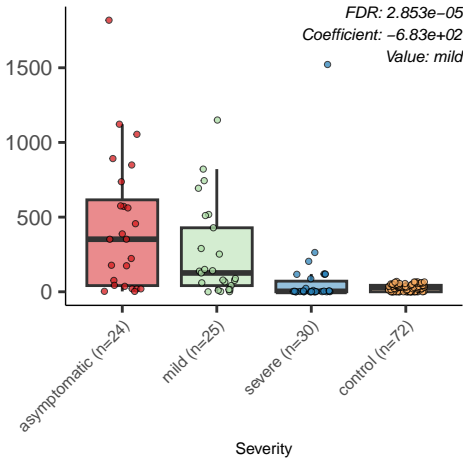

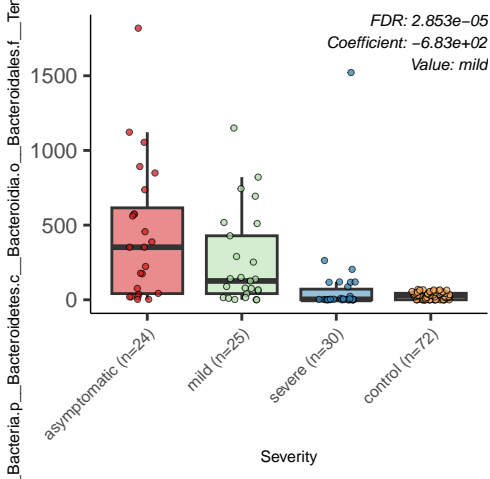

FDR:  $2.853e-05$   
Coefficient:  $-6.83e+02$   
Value: mild

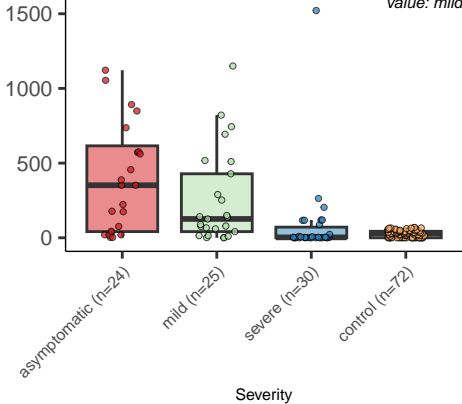

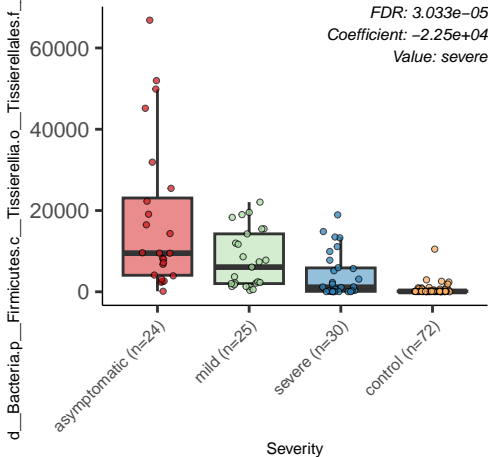

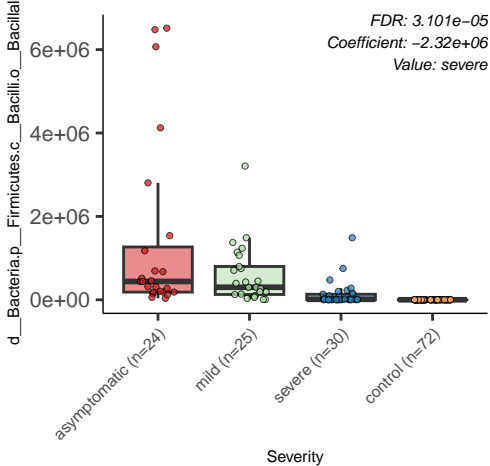



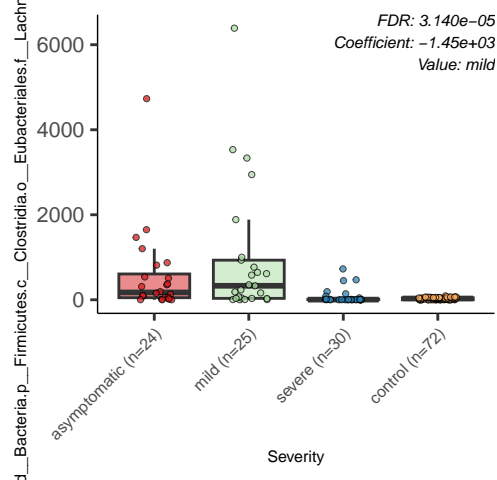

u.p\_\_Firmicutes.c\_\_Clostridia.o\_\_Eubacteriales.f\_\_Lachnospiraceae

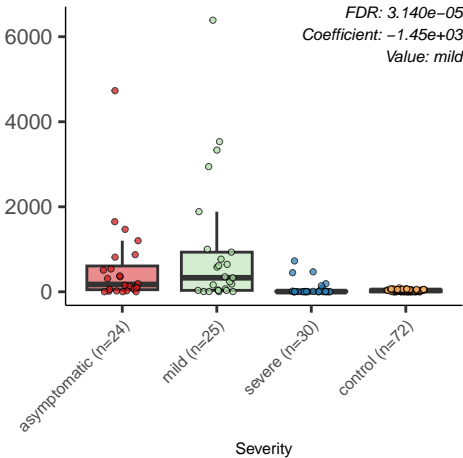

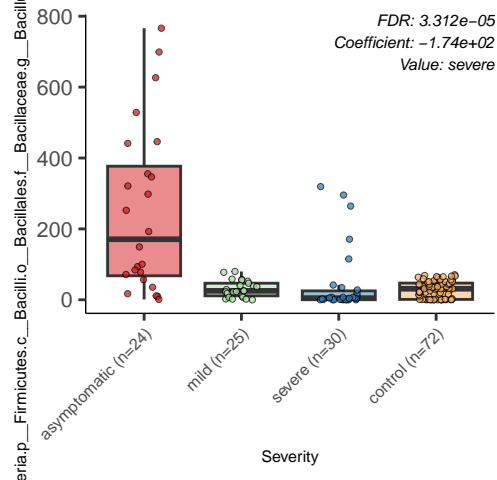

scutes.c\_\_Mollicutes.o\_\_Mycoplasmales.f\_\_Mycoplasmataceae.g

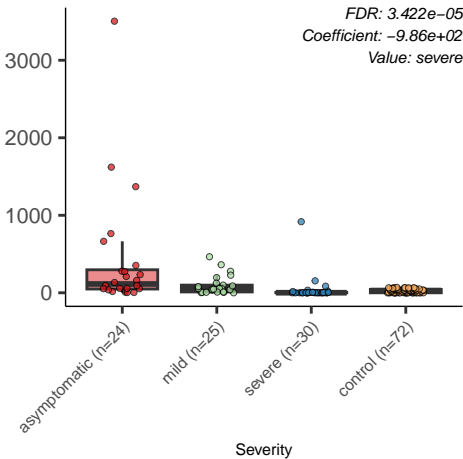

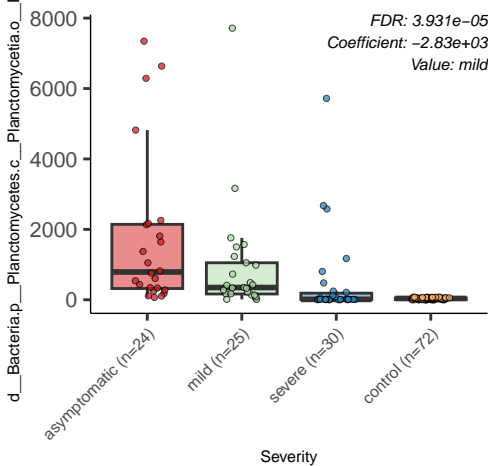

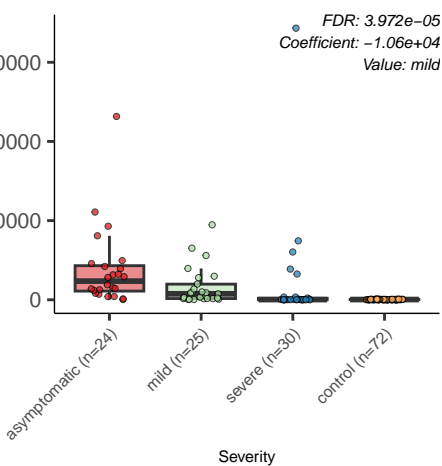

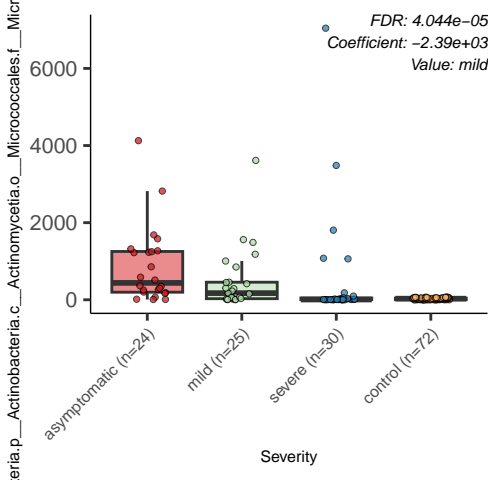

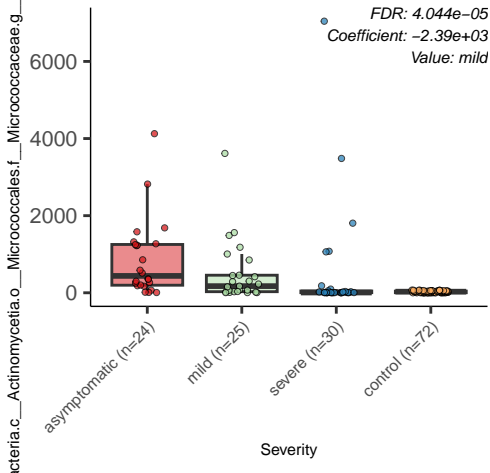



phylum: Bacteroidetes, class: Sphingobacteriia, order: Sphingobacteriales, family: Sphingobacteriaceae, genus: Sphingobacterium, species: Sphingobacterium

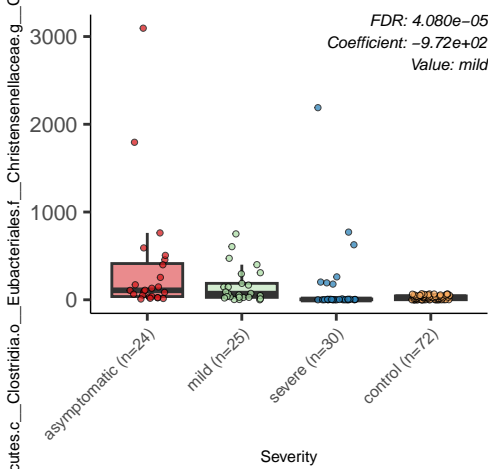

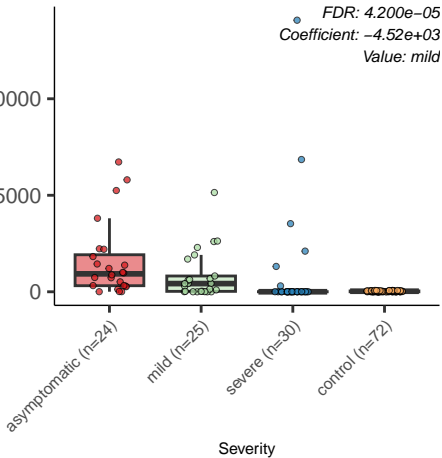

icutes.c\_\_Bacilli.o\_\_Lactobacillales.f\_\_Enterococcaceae.g\_\_Tetrag

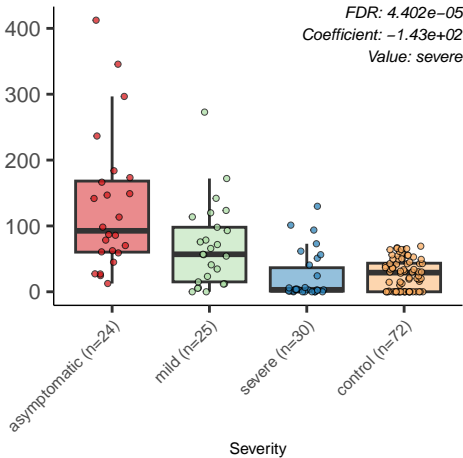

d\_\_Bacteria.p\_\_Planctomycetes.c\_\_Planctomycetia.o\_\_Pirellulales

FDR:  $4.440e-05$   
Coefficient:  $-2.08e+03$   
Value: mild

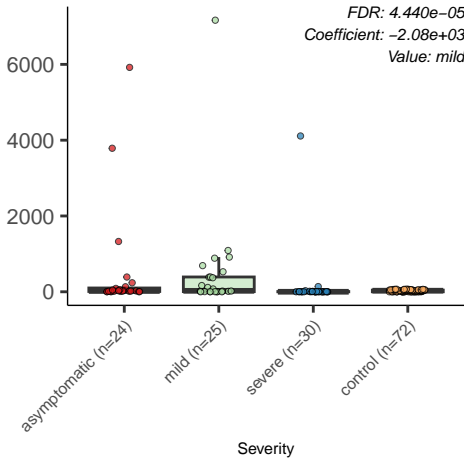

eria.p\_\_Planctomycetes.c\_\_Planctomycetia.o\_\_Pirellulales.f\_\_Therr

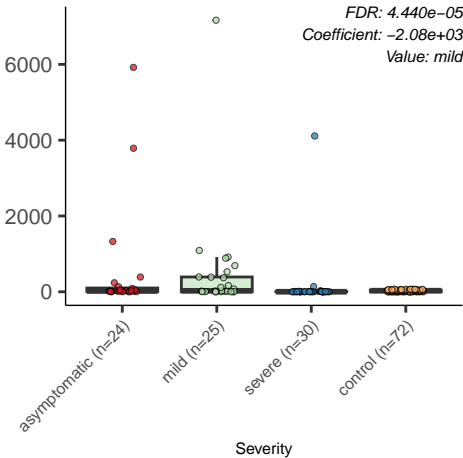

ctomycetes.c\_\_Planctomycetia.o\_\_Pirellulales.f\_\_Thermoguttaceae.

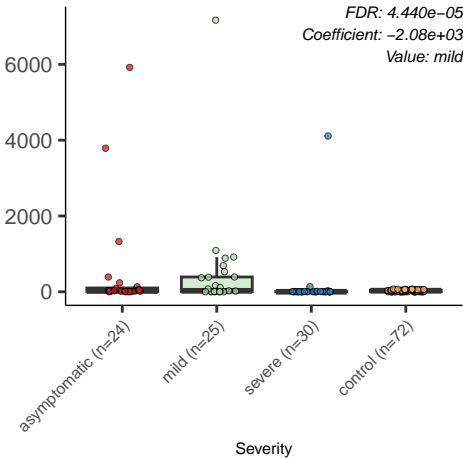

d\_\_Bacteria.p\_\_Proteobacteria.c\_\_Alphaproteobacteria.o\_\_Spirochaetes

75000

50000

25000

0

asymptomatic (n=24)

mild (n=25)

severe (n=30)

control (n=72)

Severity

FDR:  $4.455e-05$

Coefficient:  $-3.51e+04$

Value: severe

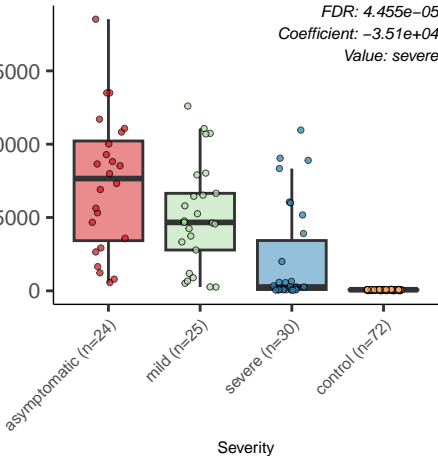

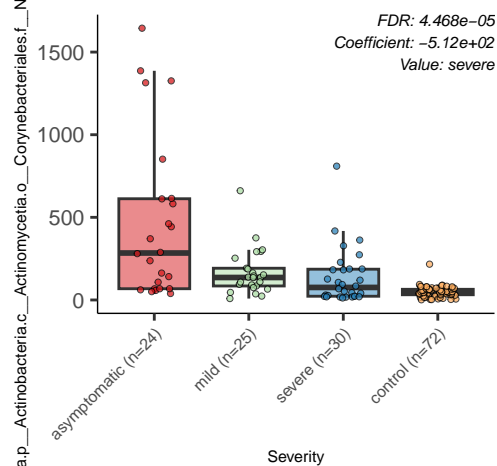



teobacteria.c\_\_Gammaproteobacteria.o\_\_Oceanospirillales.f\_\_Hal

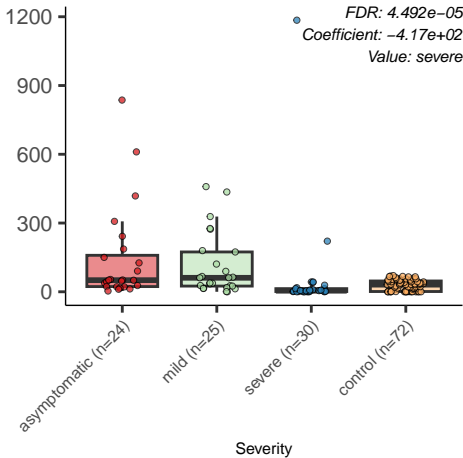

d\_Bacteria.p\_Firmicutes.c\_Bacilli.o\_Bacillales.f\_Planococcaceae

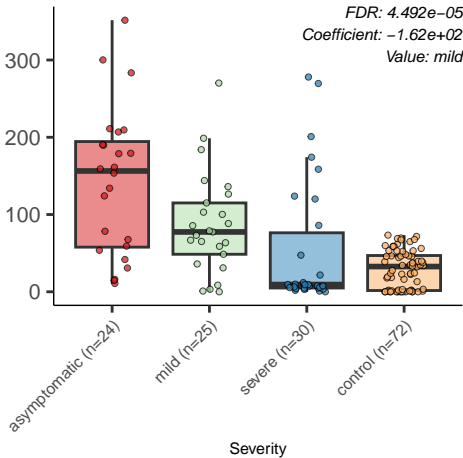

a.p\_\_Cyanobacteria.o\_\_Oscillatoriales.f\_\_Oscillatoriaceae.g\_\_Oscil

FDR:  $4.726e-05$   
Coefficient:  $-1.84e+02$   
Value: severe

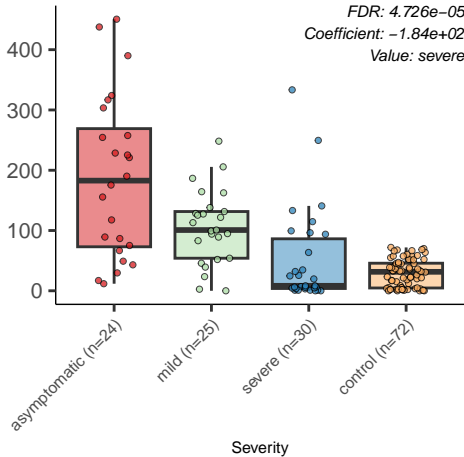

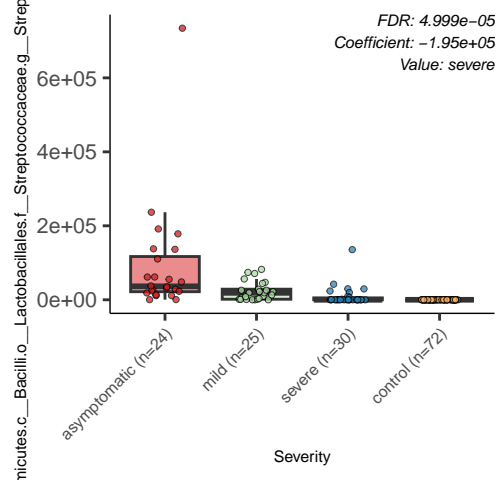

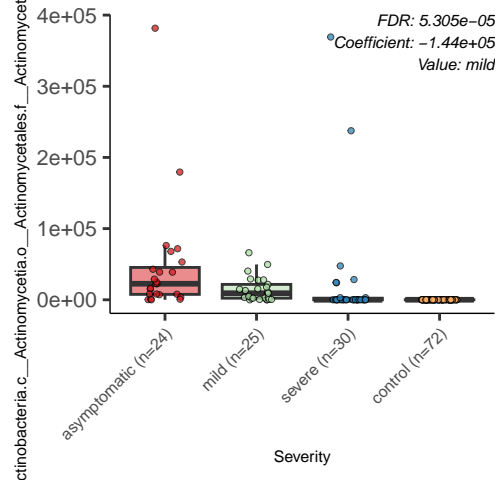

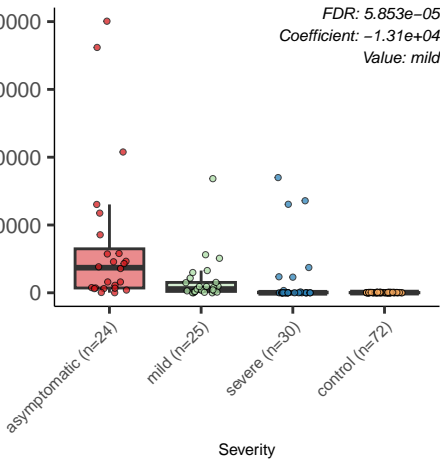

d\_Bacteria.p\_Firmicutes.c\_Bacilli.o\_Bacillales.f\_Bacillaceae

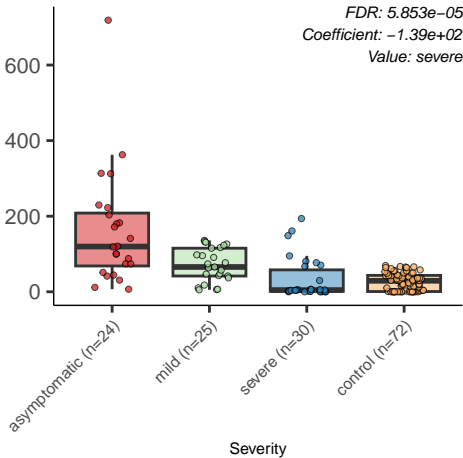

ia.p\_\_Firmicutes.c\_\_Bacilli.o\_\_Bacillales.f\_\_Bacillaceae.g\_\_Weizma

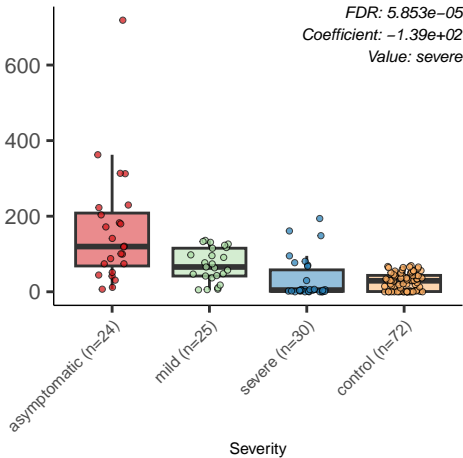



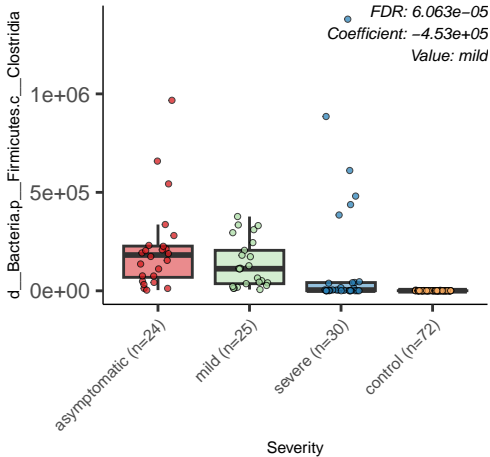

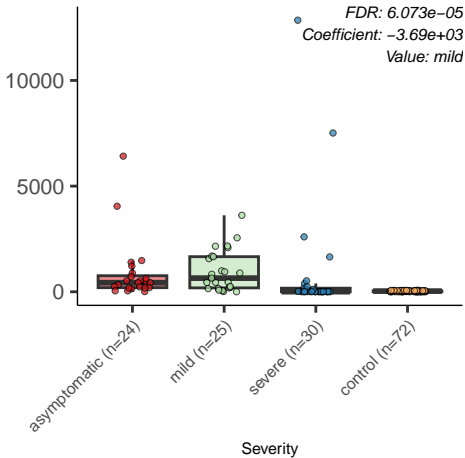

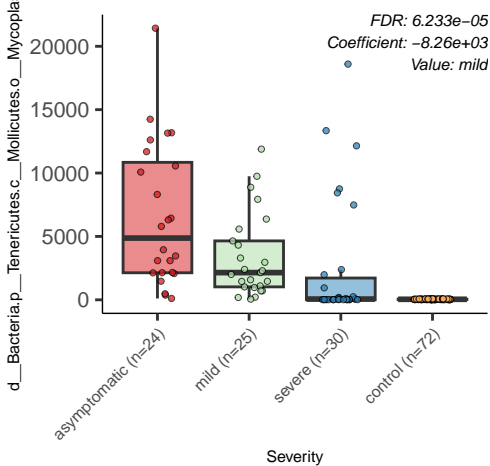

d\_Bacteria.p\_Tenericutes.c\_Mollicutes.o\_Mycoplasmales.f

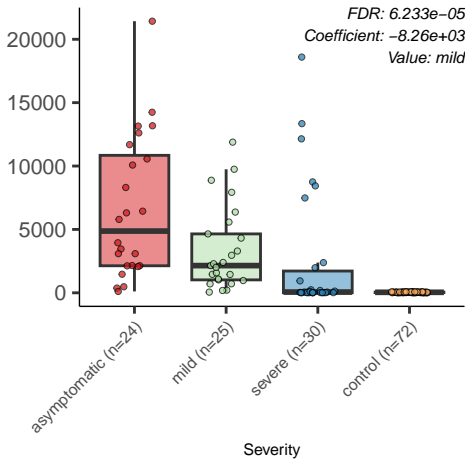

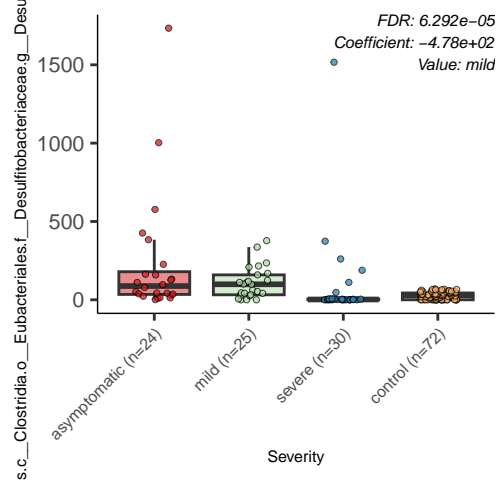

d\_Bacteria.p\_Cyanobacteria.o\_Oscillatoriales.f\_Oscillatoria

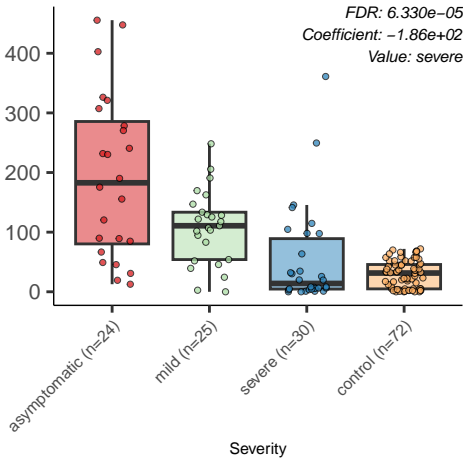

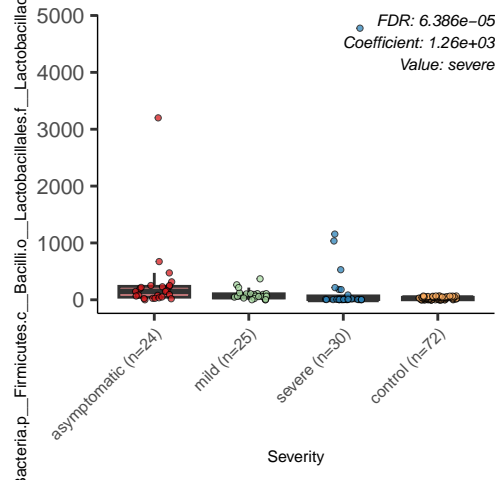

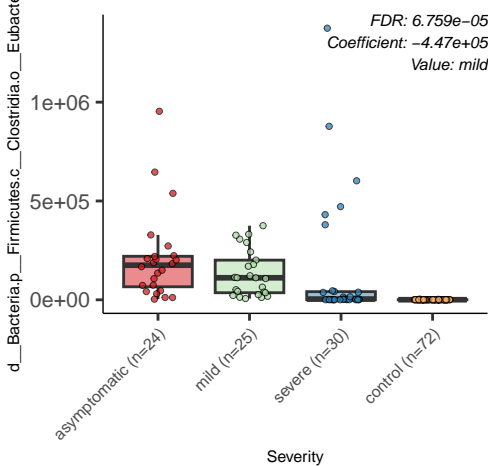



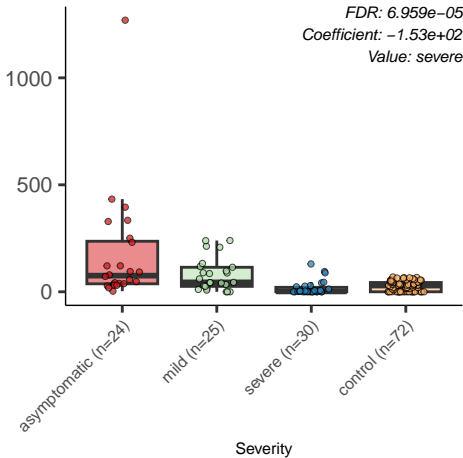

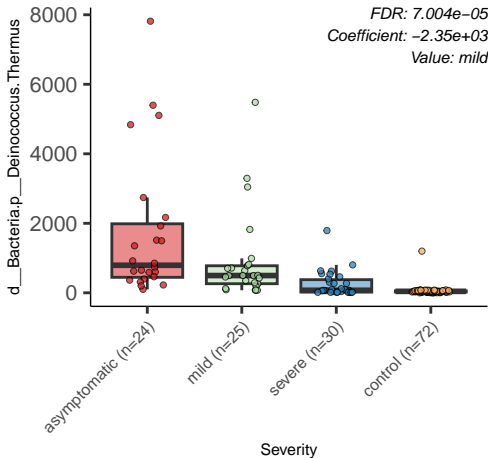

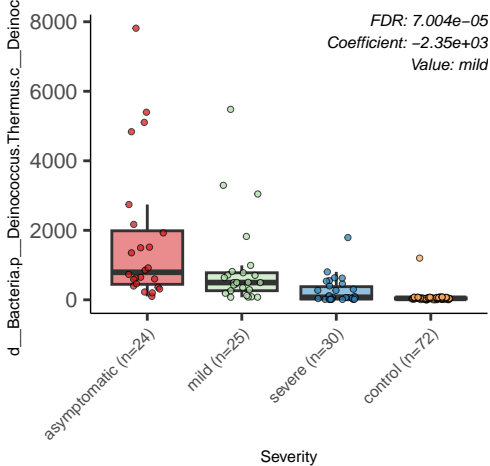

Firmicutes.c\_Bacilli.o\_Lactobacillales.f\_Streptococcaceae.g\_s

2000

1000

0

*FDR: 7.158e-05*

*Coefficient: -8.30e+02*

*Value: severe*

asymptomatic (n=24)

mild (n=25)

severe (n=30)

control (n=72)

Severity

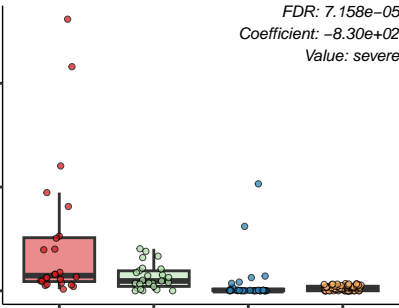

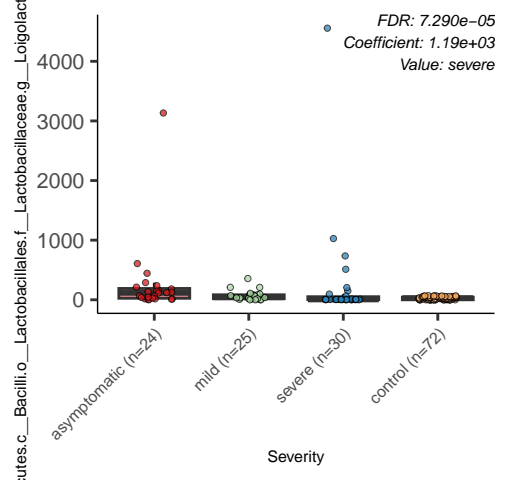

Bacteria.p\_Proteobacteria.c\_Gammaproteobacteria.o\_\_Chroma

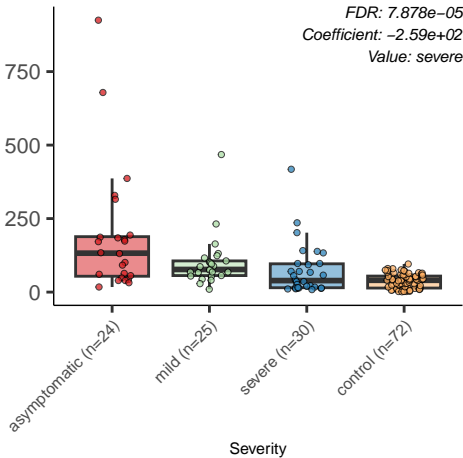

micutes.c\_\_Bacilli.o\_\_Lactobacillales.f\_\_Streptococcaceae.g\_\_Stre

*FDR: 7.957e-05*  
*Coefficient: -4.70e+02*  
*Value: severe*

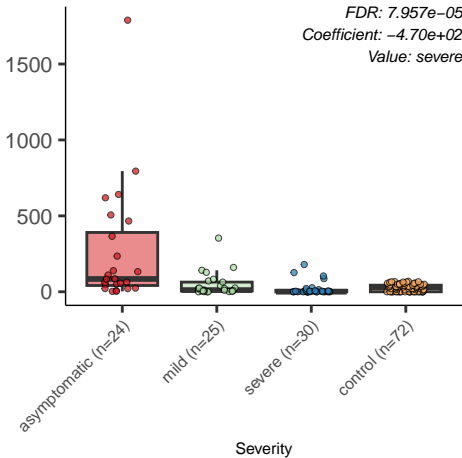

d\_Bacteria.p\_Bacteroidetes.o\_Bacteroidetes.Order.II.L...

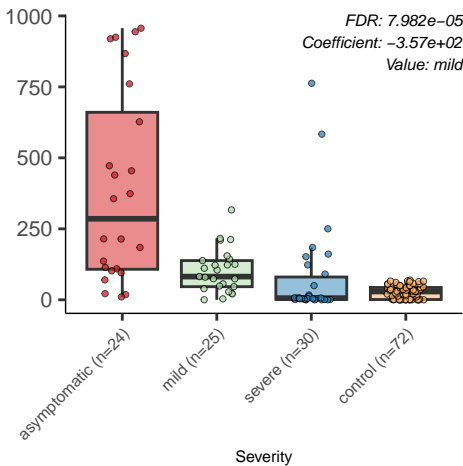



Bacteria.p\_Bacteroidetes.o\_\_Bacteroidetes.Order.II..Incertae.sed

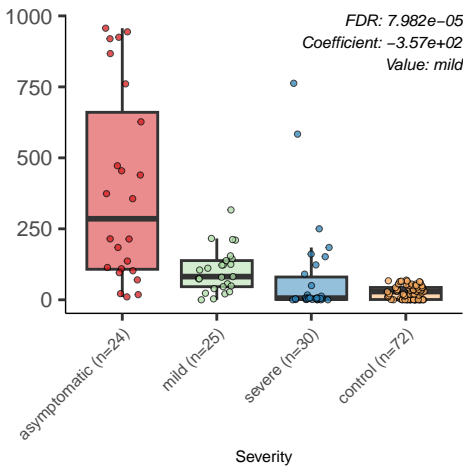

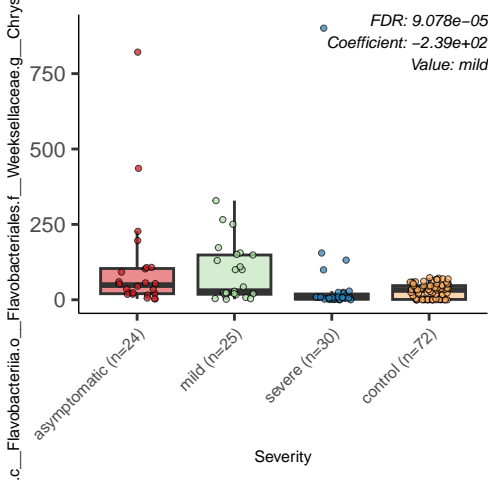

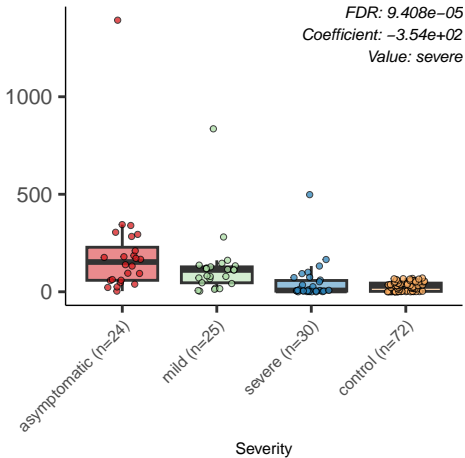

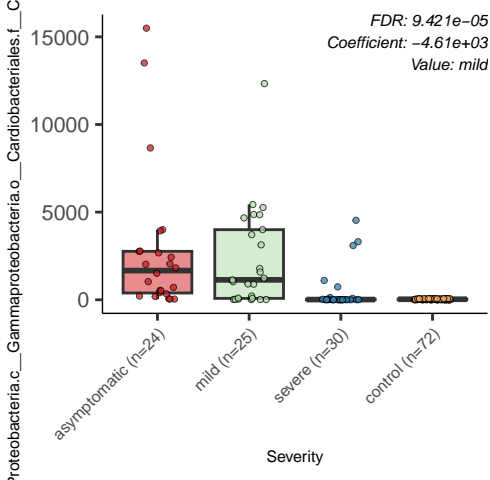

irmicutes.c\_\_Bacilli.o\_\_Lactobacillales.f\_\_Streptococcaceae.g\_\_Stre

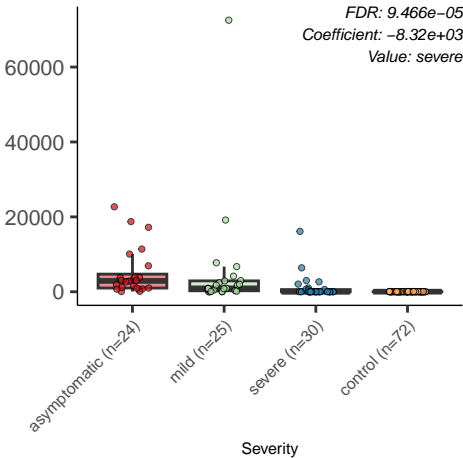

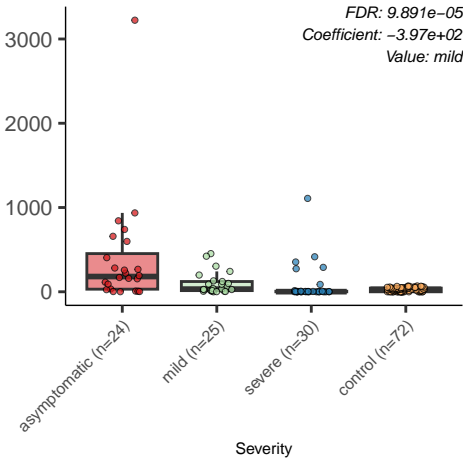

etes.c\_\_Spirochaetia.o\_\_Spirochaetales.f\_\_Treponemataceae.g\_\_T

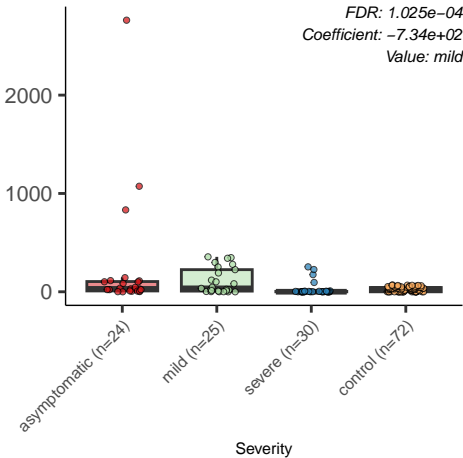

Bacteria.p\_Firmicutes.c\_Bacilli.o\_Lactobacillales.f\_Aerococcus

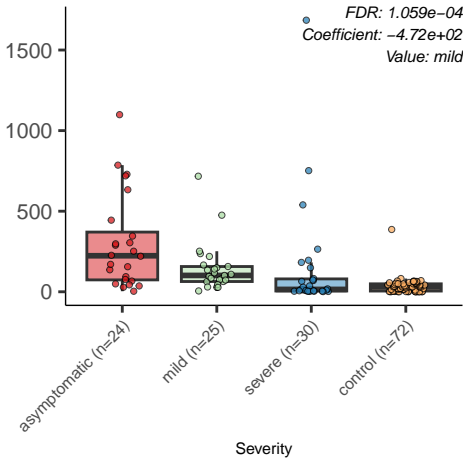



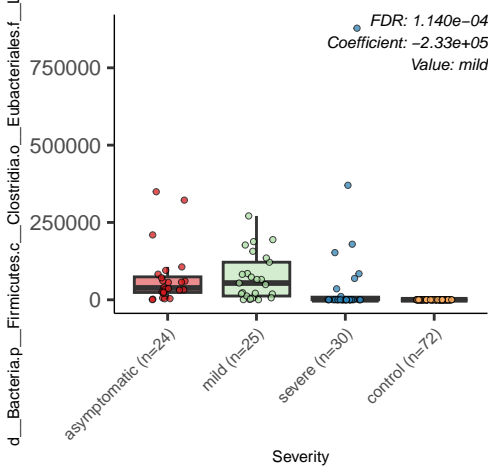

d\_Bacteria.p\_Proteobacteria.c\_Gammaproteobacteria.o\_o

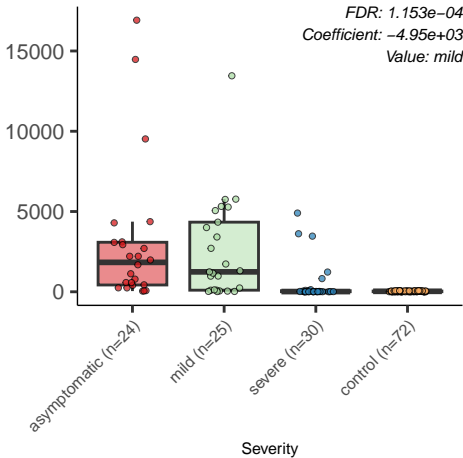

bacteria.p\_\_Proteobacteria.c\_\_Gammaproteobacteria.o\_\_Cardiobacter

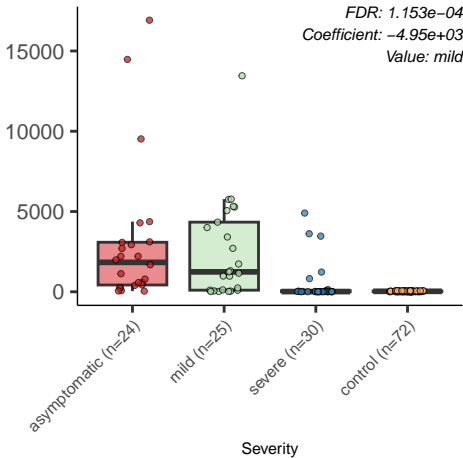

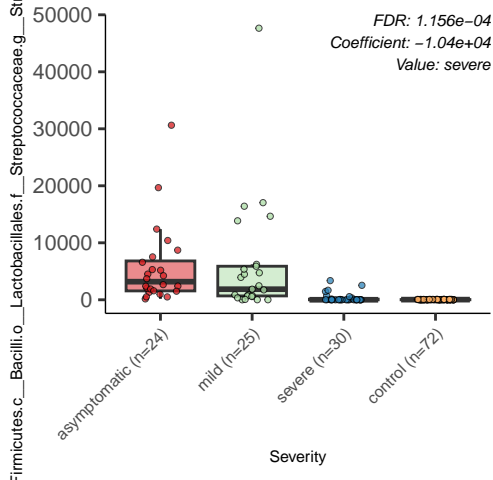

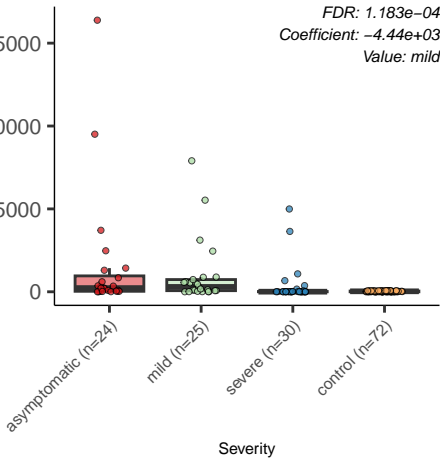

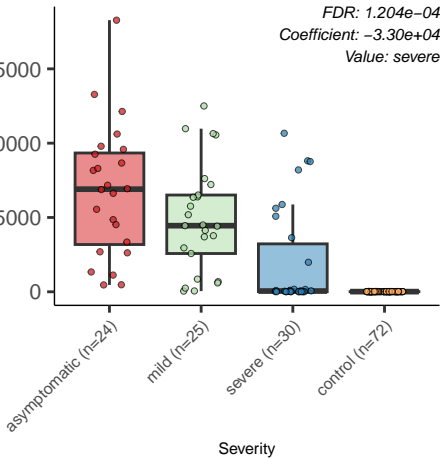

Firmicutes.c\_\_Clostridia.o\_\_Eubacteriales.f\_\_Lachnospiraceae.g

20000

10000

0

asymptomatic (n=24)

mild (n=25)

severe (n=30)

control (n=72)

Severity

*FDR: 1.235e-04*  
*Coefficient: -4.62e+03*  
*Value: mild*

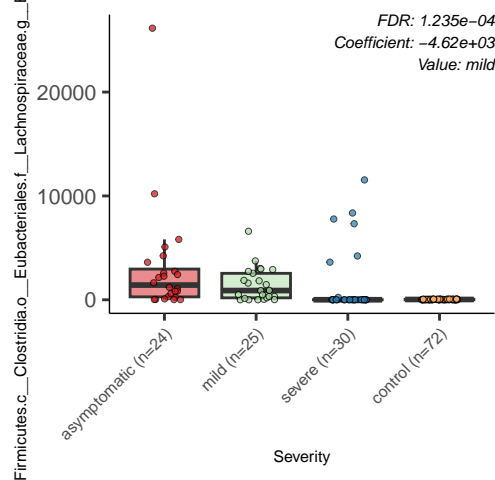

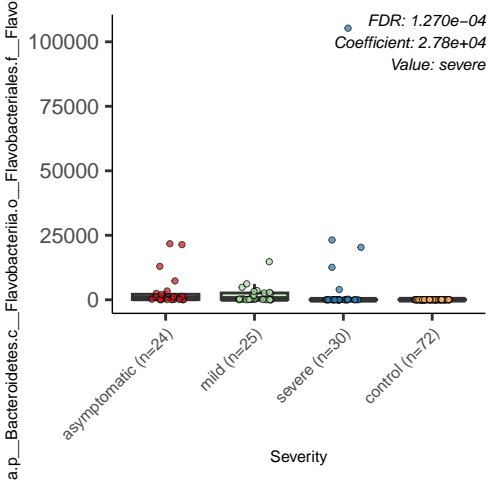



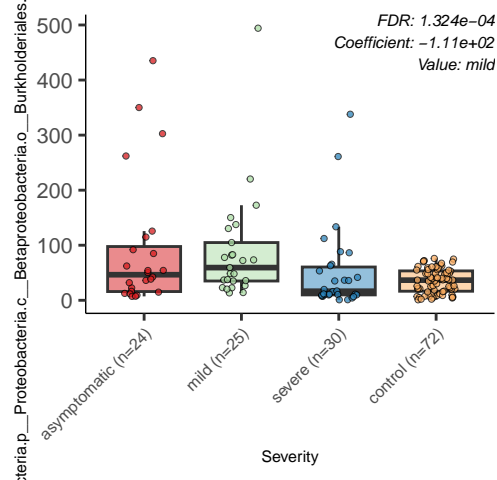

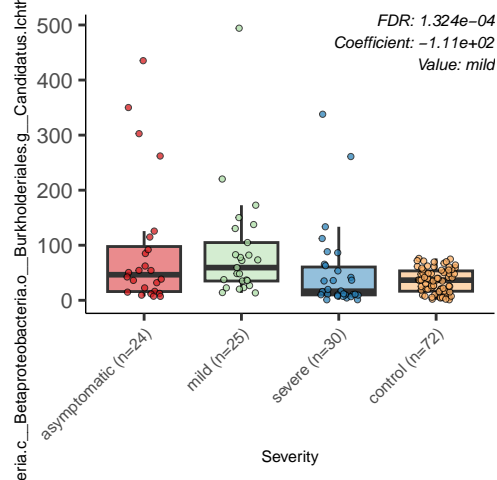

Bacteria.p\_\_Proteobacteria.c\_\_Alphaproteobacteria.o\_\_Rickettsia

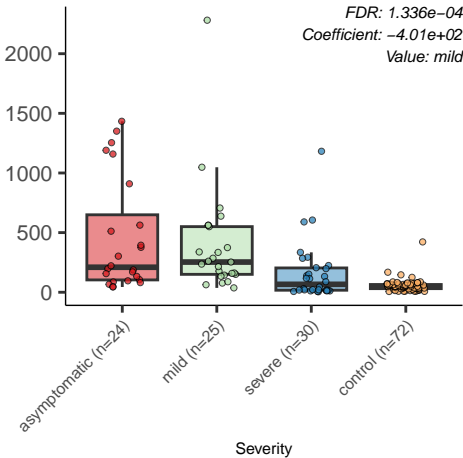

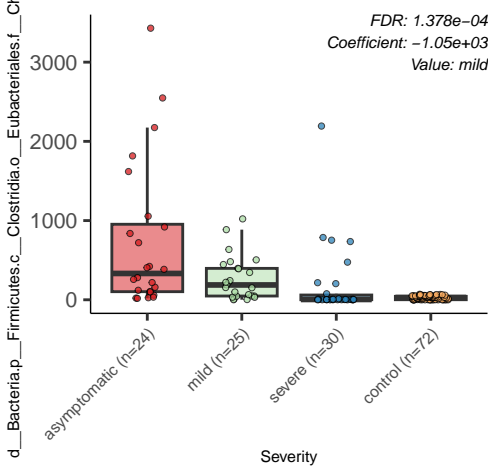

bacteria.p\_Firmicutes.c\_Clostridia.o\_Eubacteriales.f\_Christensen

FDR:  $1.378e-04$   
Coefficient:  $-1.05e+03$   
Value: mild

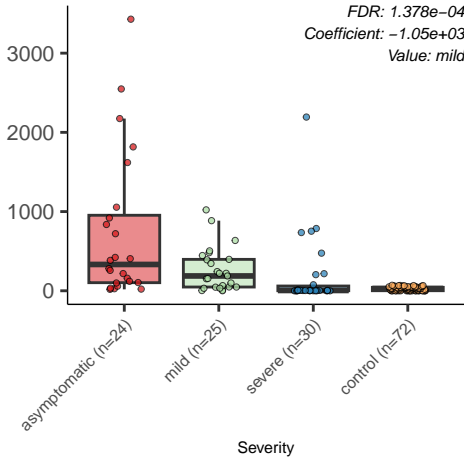

d\_Bacteria.p\_Firmicutes.c\_Bacilli.o\_Bacillales.f\_Thermo

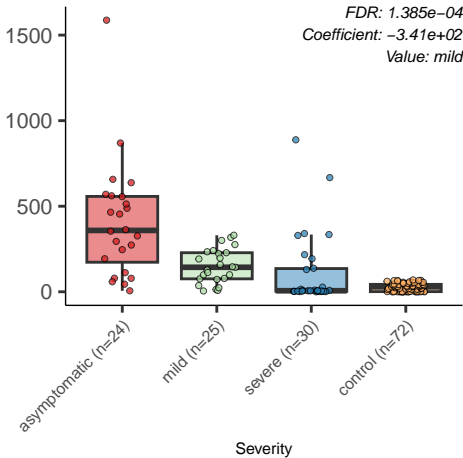

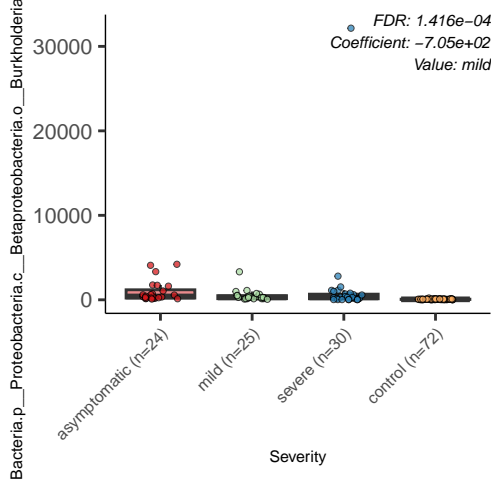

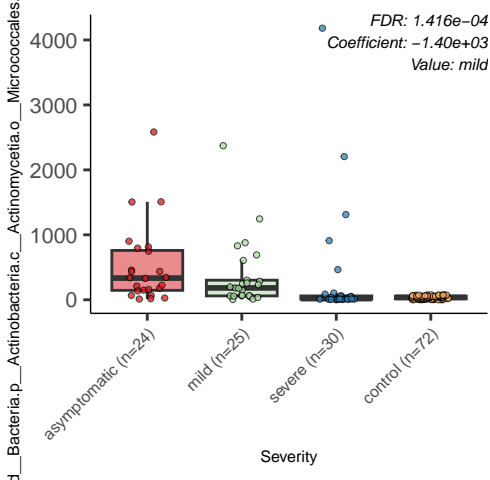



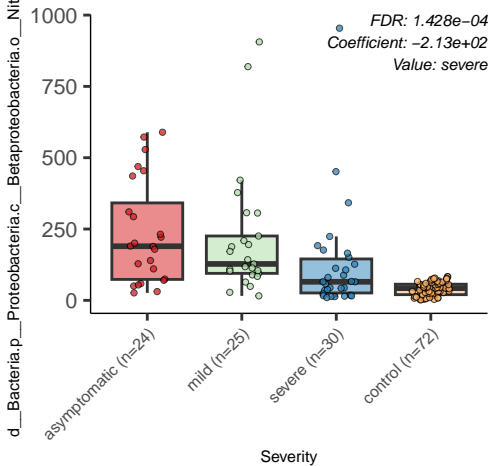

Proteobacteria.c\_\_Alphaproteobacteria.o\_\_Sphingomonadales.f\_\_E

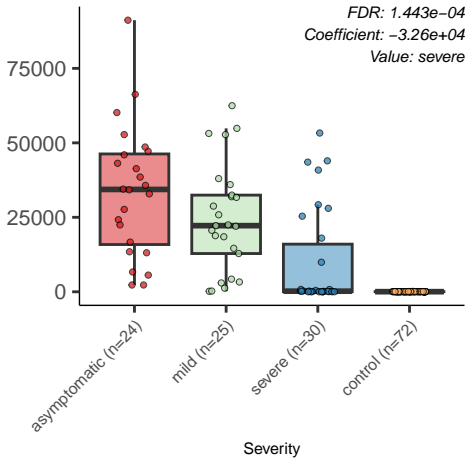

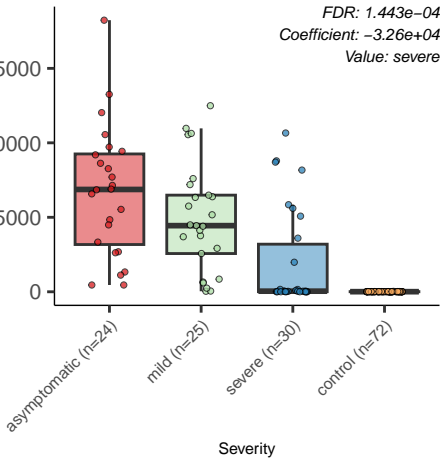

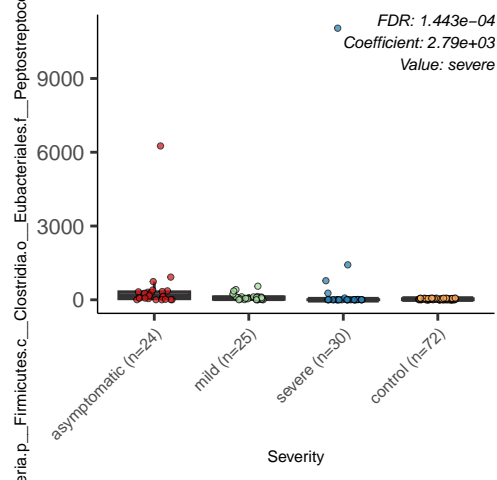

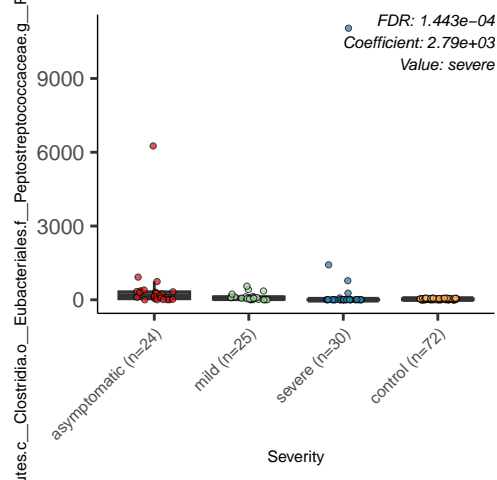

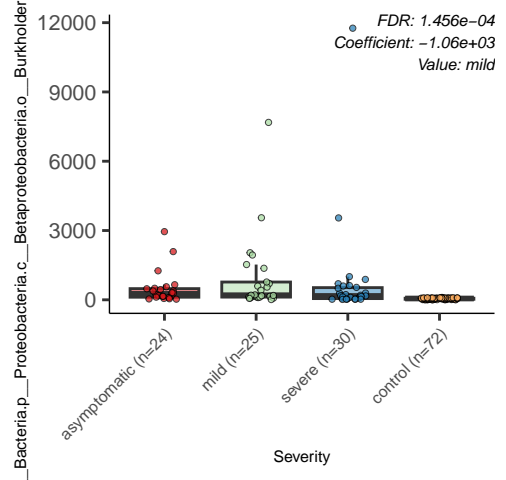

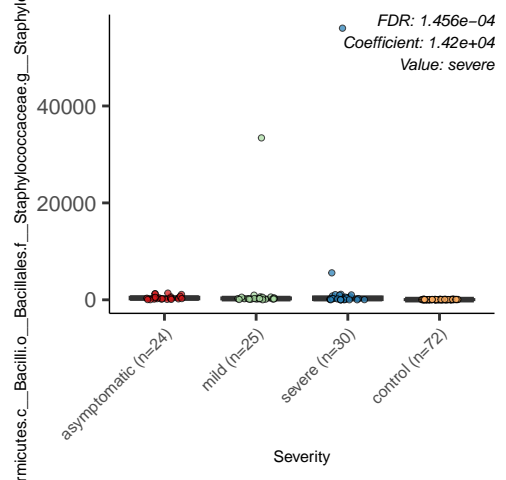

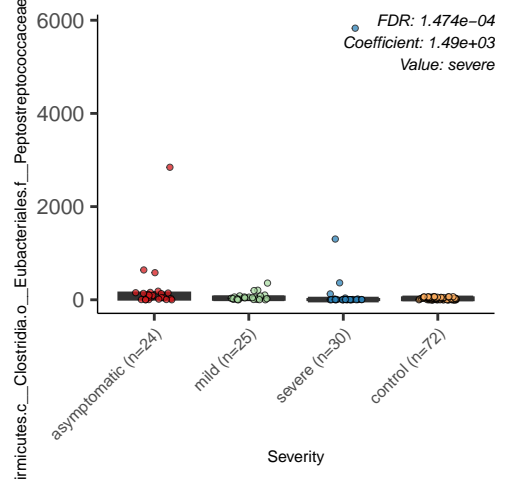



a.p\_\_Proteobacteria.c\_\_Betaproteobacteria.o\_\_Burkholderiales.f\_\_B

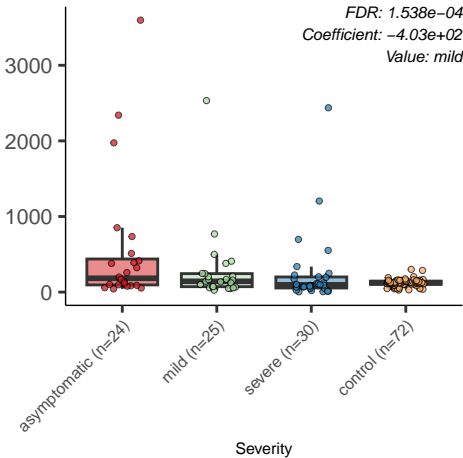

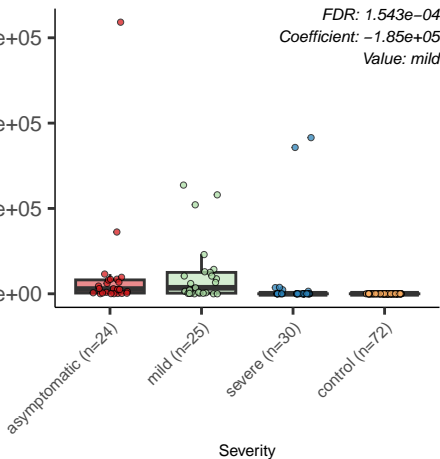

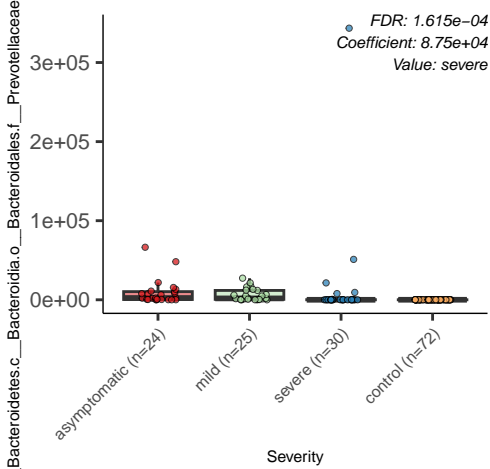

Bacteria.p\_\_Proteobacteria.c\_\_Gammaproteobacteria.o\_\_Enterob

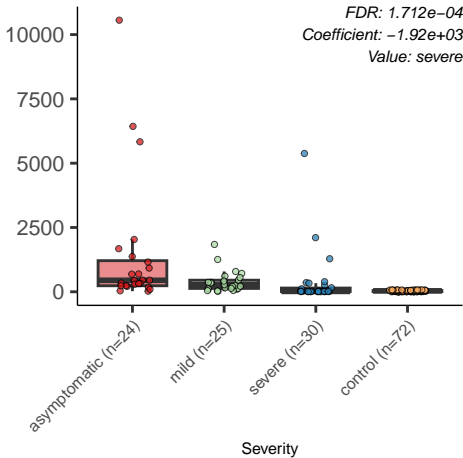

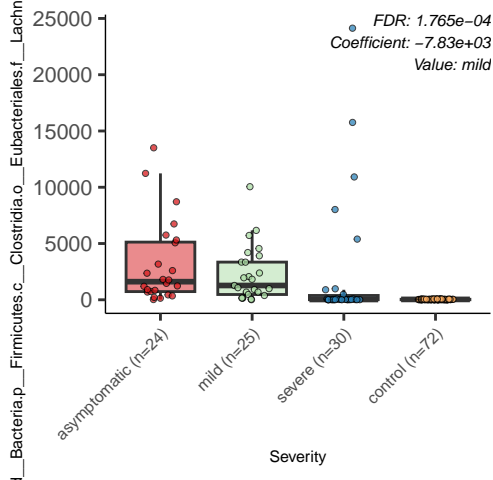

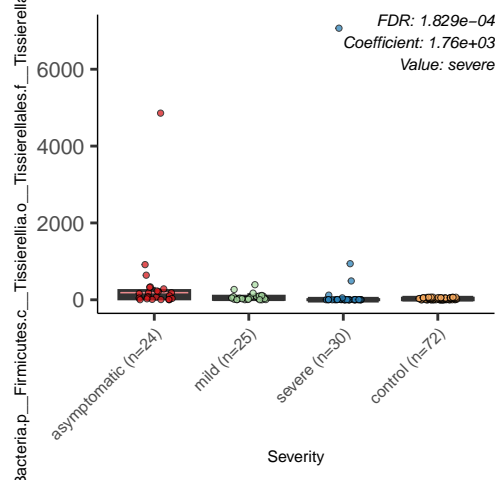

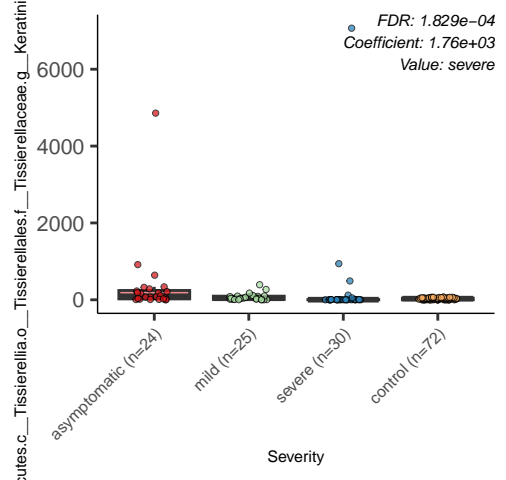

Firmicutes.c\_\_Clostridia.o\_\_Eubacteriales.f\_\_Clostridiaceae.g\_\_Alkal

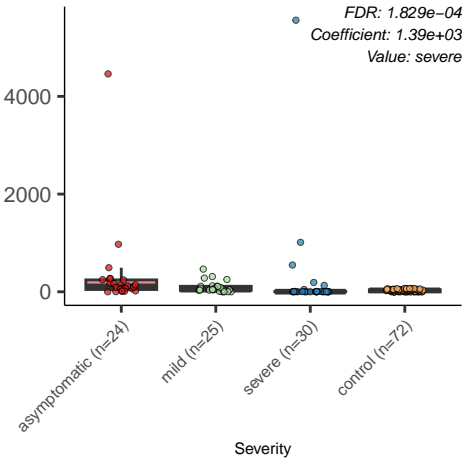



Bacteria.p\_Firmicutes.c\_Clostridia.o\_Eubacteriales.f\_Peptostreptococci

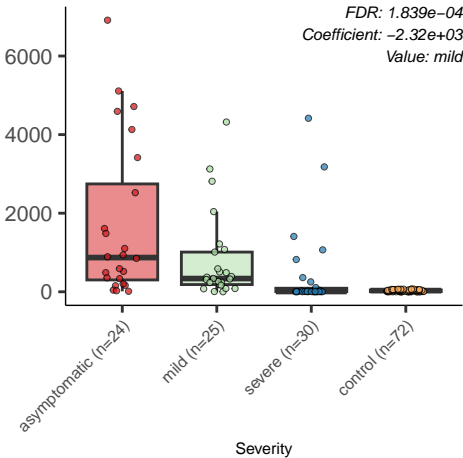

Firmicutes.c\_\_Clostridia.o\_\_Eubacteriales.f\_\_Peptostreptococcae

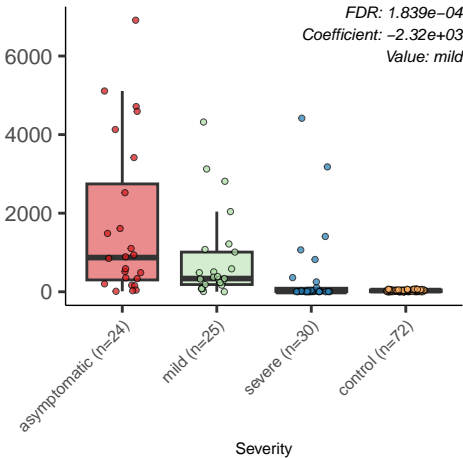

detes.c\_Flavobacteriia.o\_Flavobacteriales.f\_Blattabacteriaceae.g

*FDR: 1.845e-04*  
*Coefficient: -1.31e+03*  
*Value: mild*

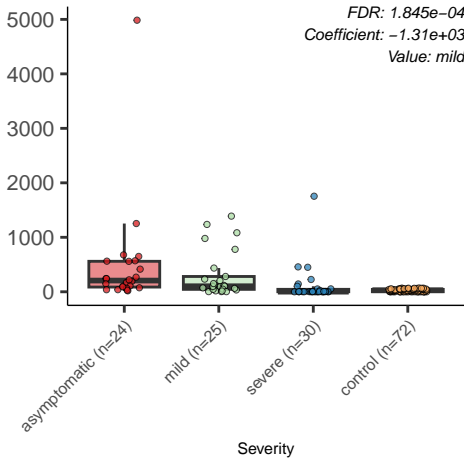

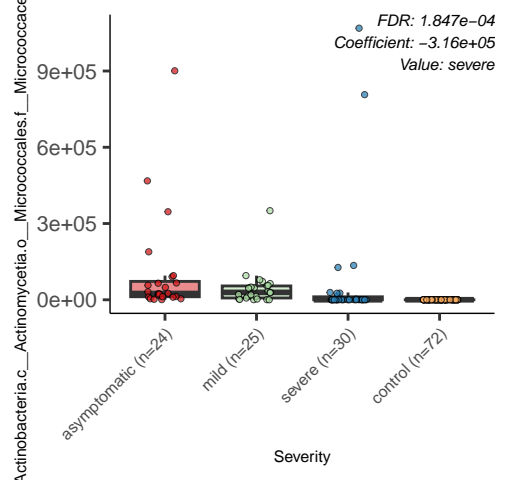

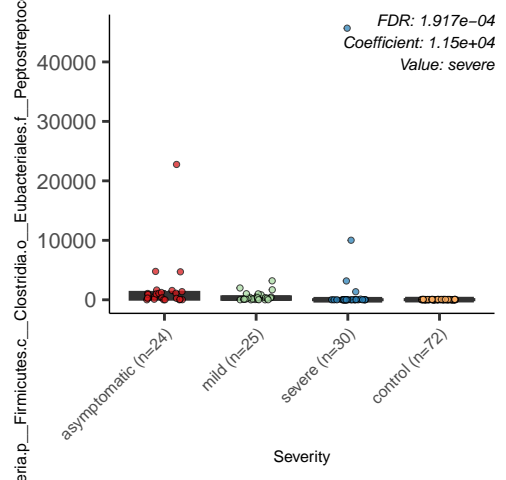

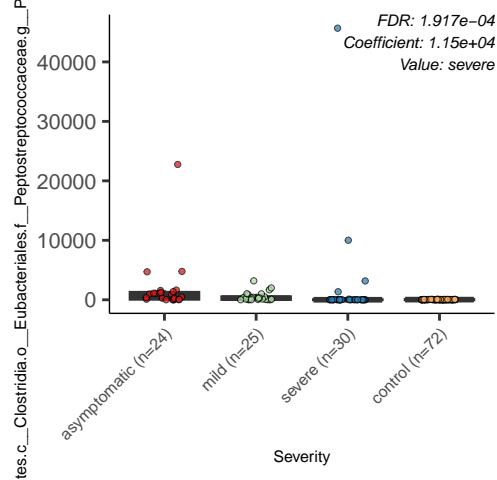

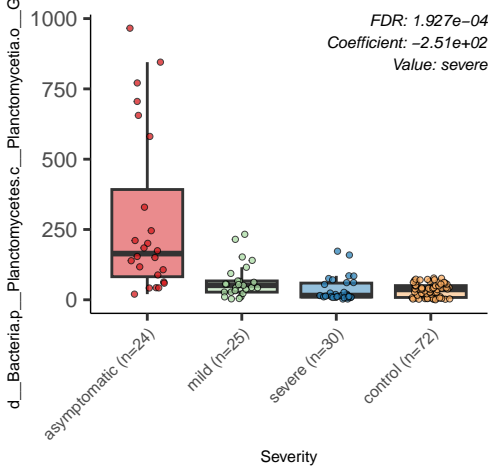

d\_Bacteria.p\_\_Planctomycetes.c\_\_Planctomycetia.o\_\_Gemmatimonadetes

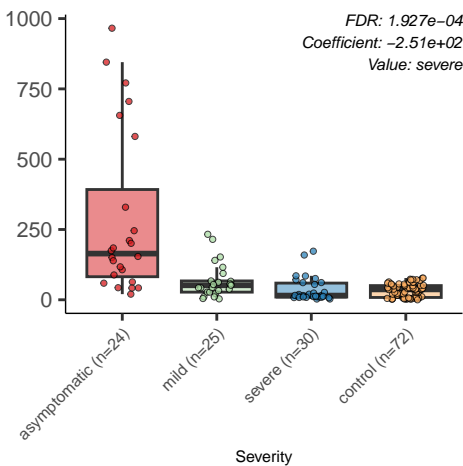



Bacteria.p\_Firmicutes.c\_Clostridia.o\_Eubacteriales.f\_Clostridia

FDR:  $1.949\text{e-}04$   
Coefficient:  $-1.42\text{e}+03$   
Value: mild

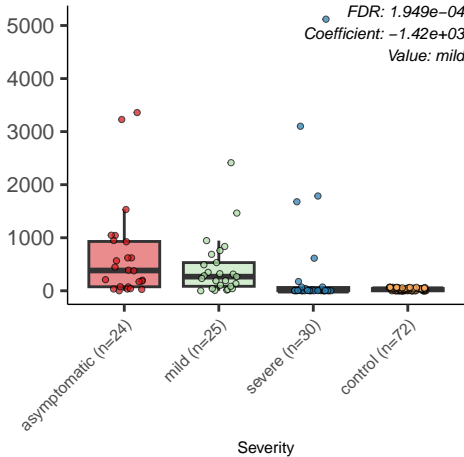

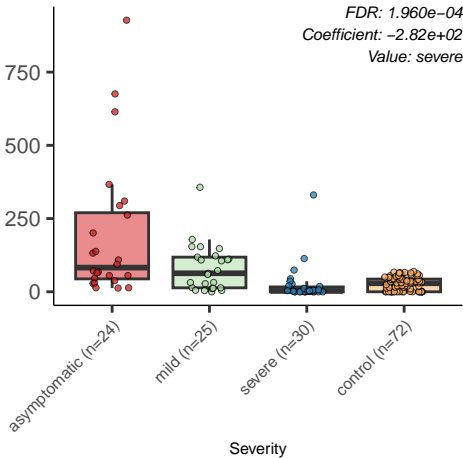

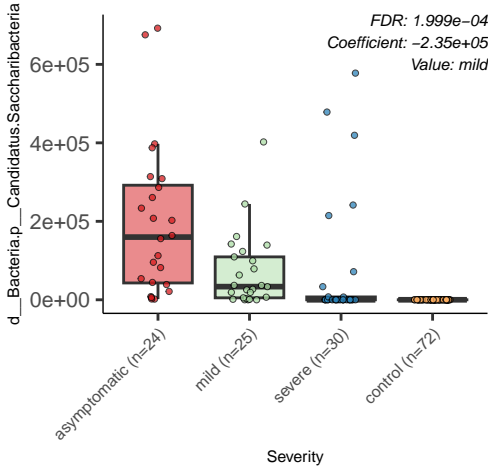

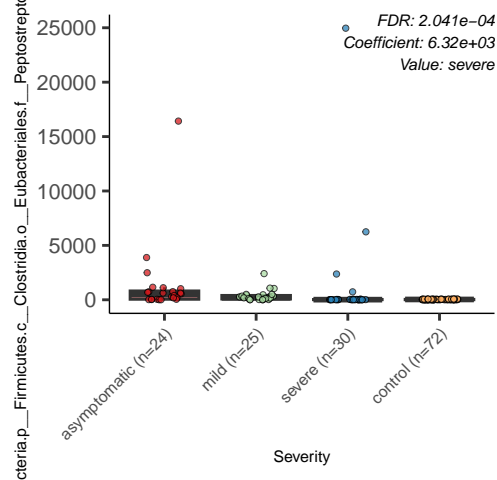

ria.p\_\_Bacteroidetes.c\_\_Flavobacteriia.o\_\_Flavobacteriales.f\_\_Wee

FDR:  $2.060 \times 10^{-4}$   
Coefficient:  $-2.59 \times 10^2$   
Value: mild

1000

500

0

asymptomatic (n=24)

mild (n=25)

severe (n=30)

control (n=72)

Severity

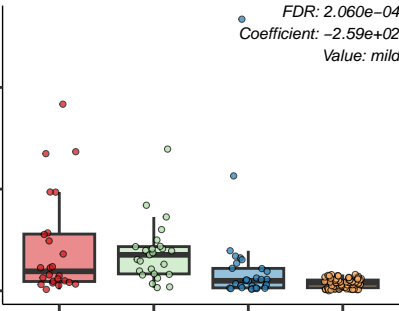

d\_Bacteria.p\_\_Firmicutes.c\_\_Clostridia.o\_\_Halanaerobiales.f

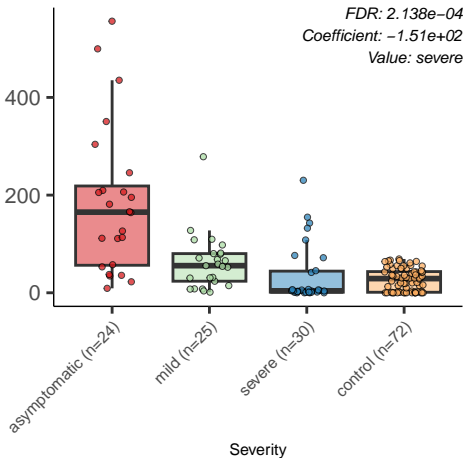

d\_\_Bacteria.p\_\_Candidatus.Saccharibacteria.c\_\_Candidatus.S

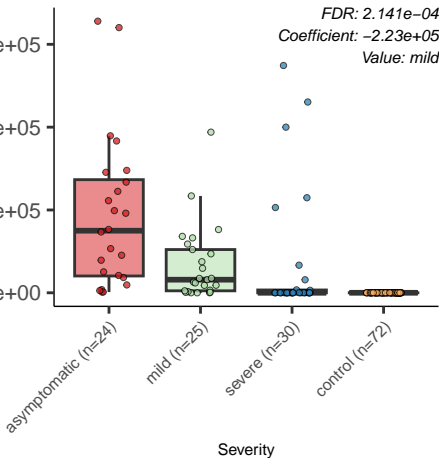

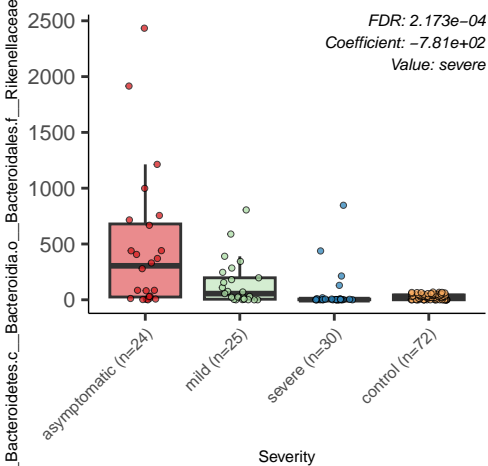



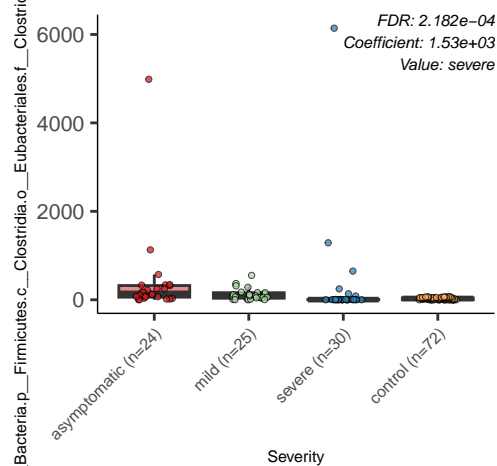

d\_Bacteria.p\_Thermotogae

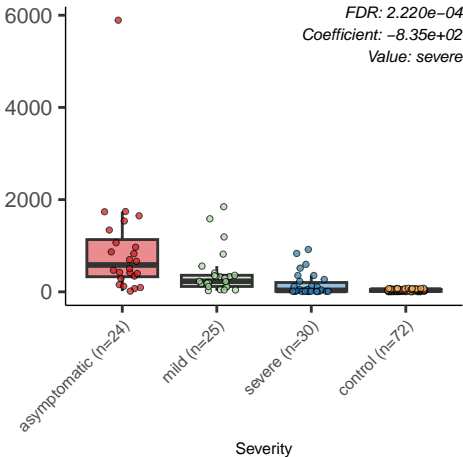

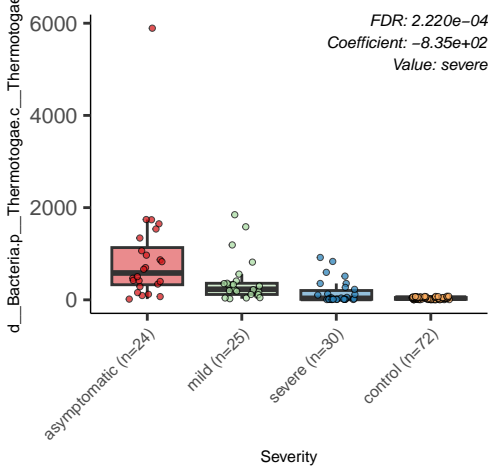

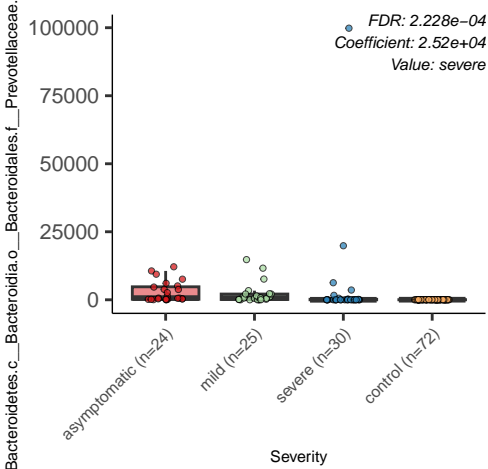

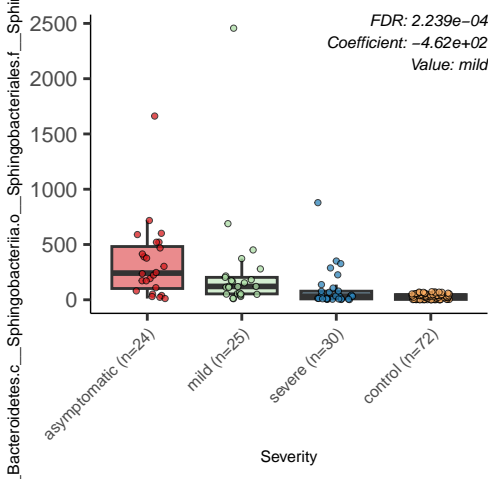

ss.c\_\_Synergistia.o\_\_Synergistales.f\_\_Synergistaceae.g\_\_Therman

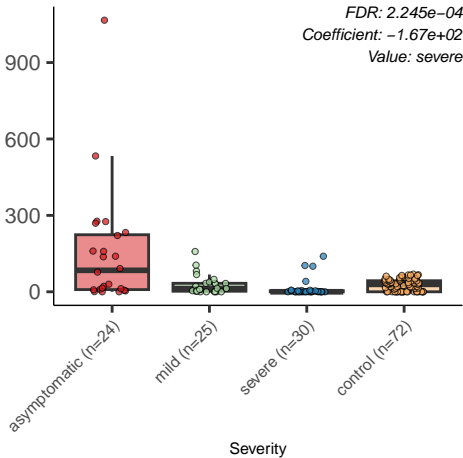

d\_Bacteria.p\_Actinobacteria.c\_Actinomycetia.o\_Micrococcales

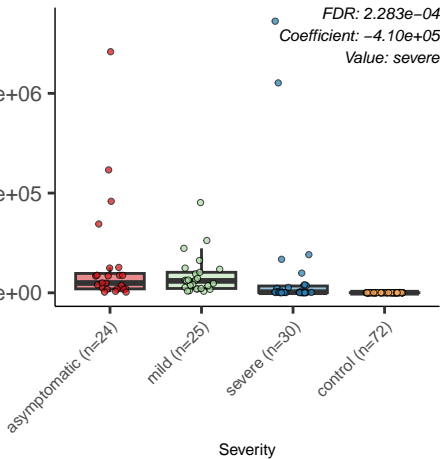

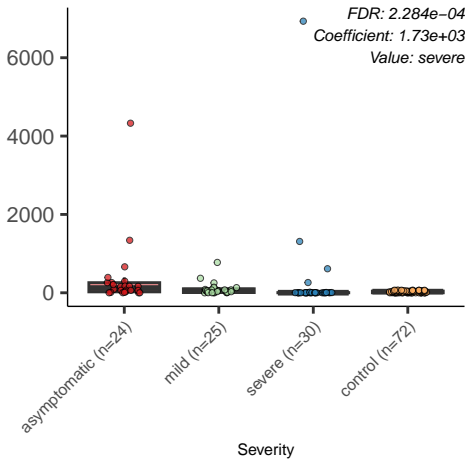



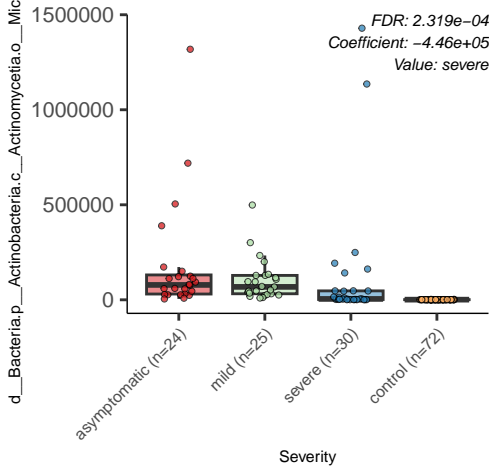

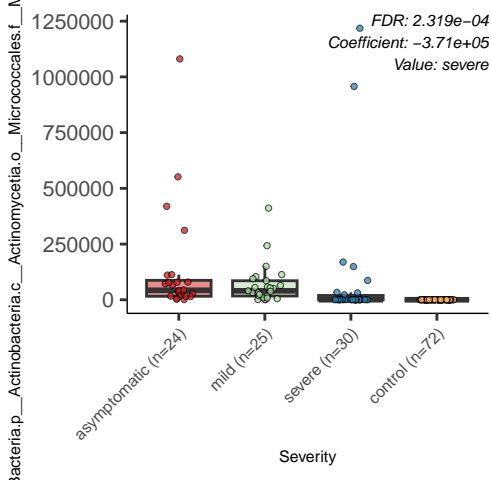

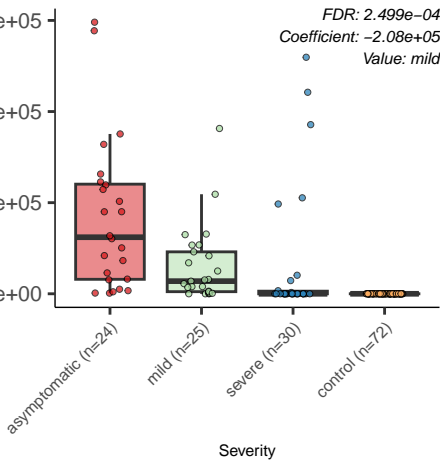

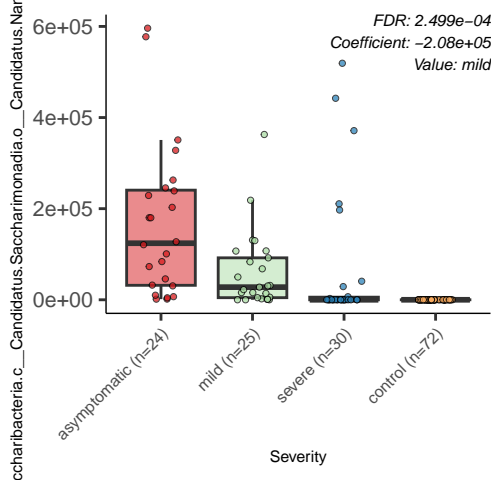

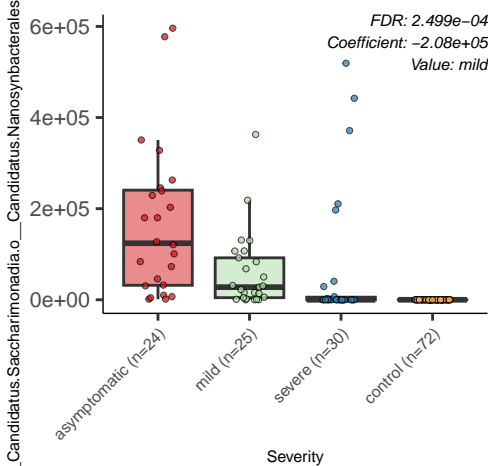

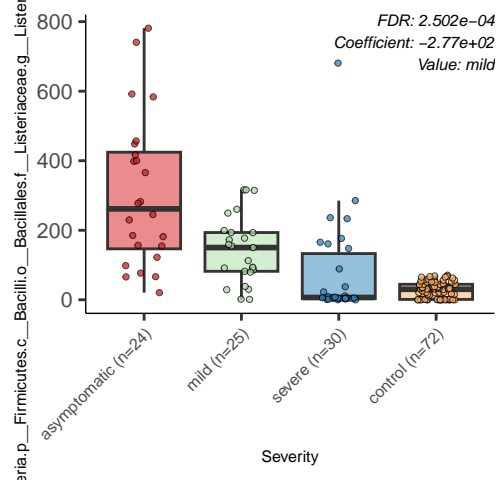

Alphaproteobacteria.o\_\_Hyphomicrobiales.f\_\_Hyphomicrobiaceae

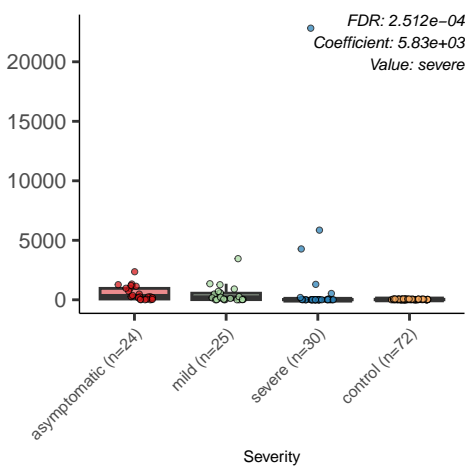

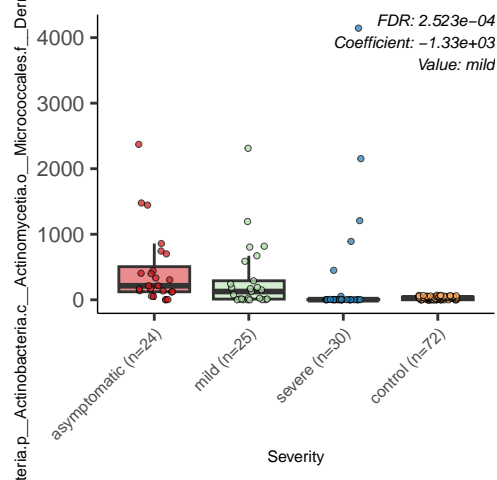



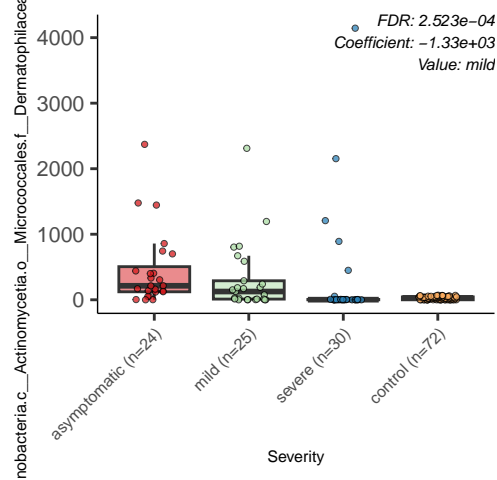

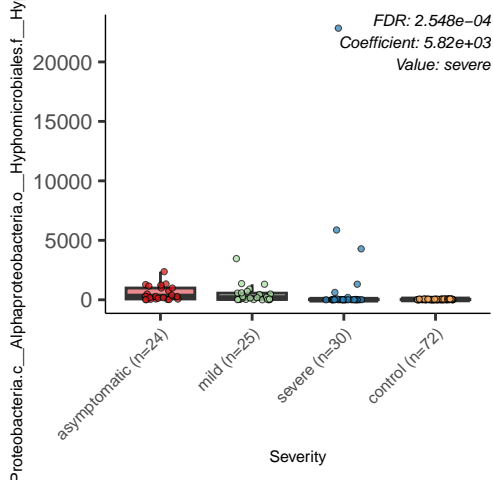

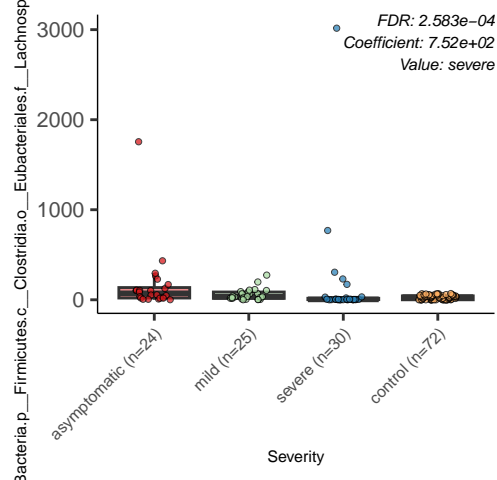

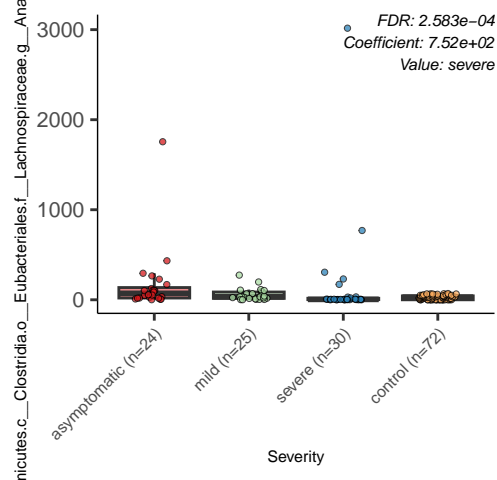

acteria.c\_\_Gammaproteobacteria.o\_\_Pasteurellales.f\_\_Pasteurella

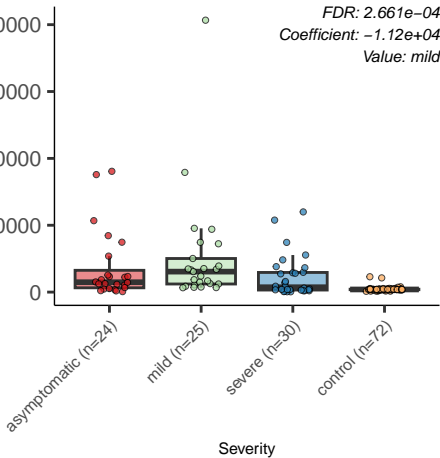

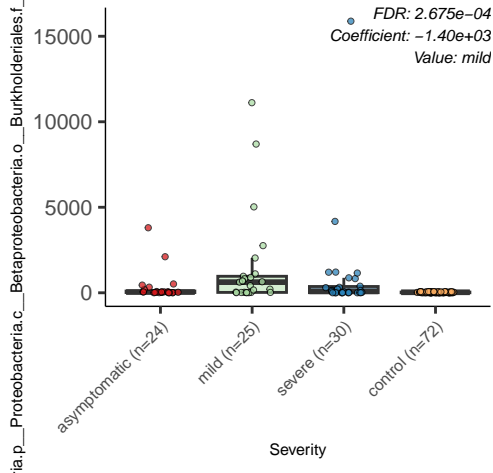

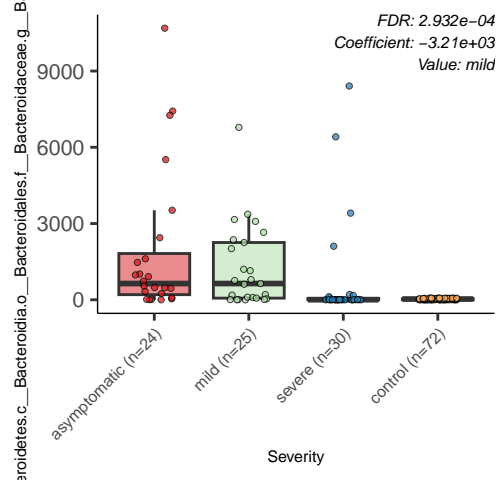

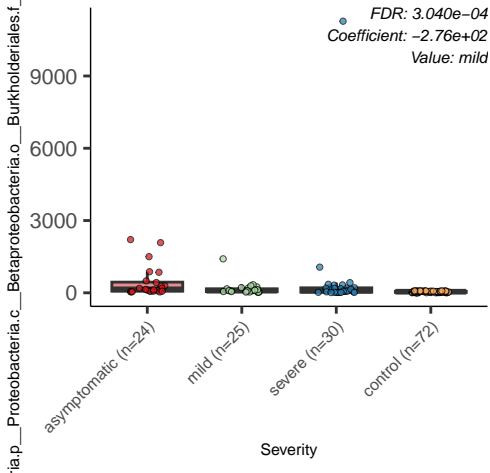



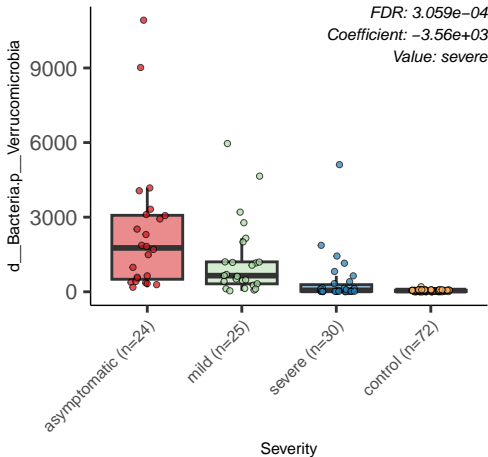

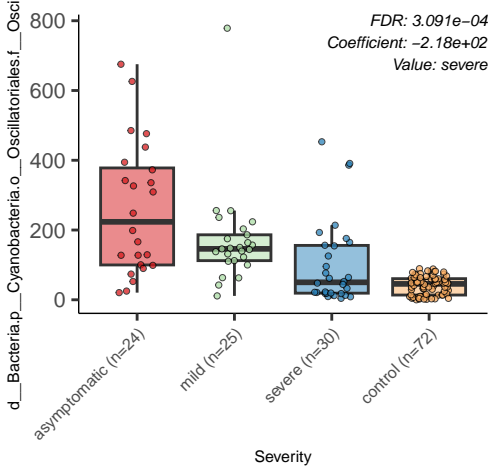

cteria.p\_\_Proteobacteria.c\_\_Alphaproteobacteria.o\_\_Hyphomicrob

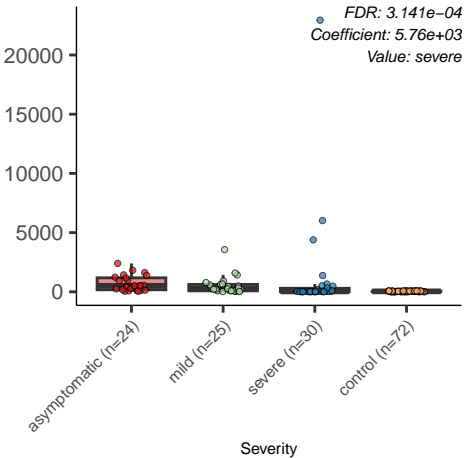

d\_Bacteria.p\_Firmicutes.c\_Clostridia.o\_Eubacteriales.f\_Valit

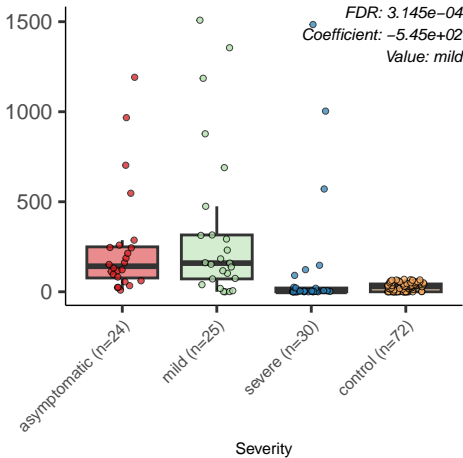

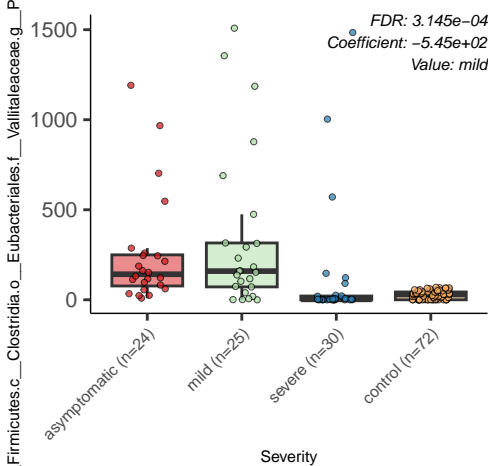

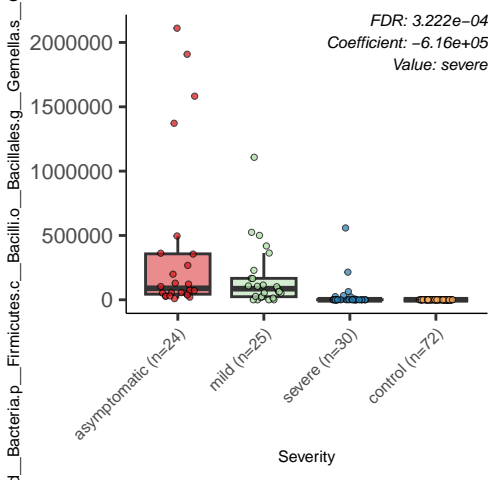

bacteria.p\_Firmicutes.c\_Clostridia.o\_Eubacteriales.f\_Oscillospira

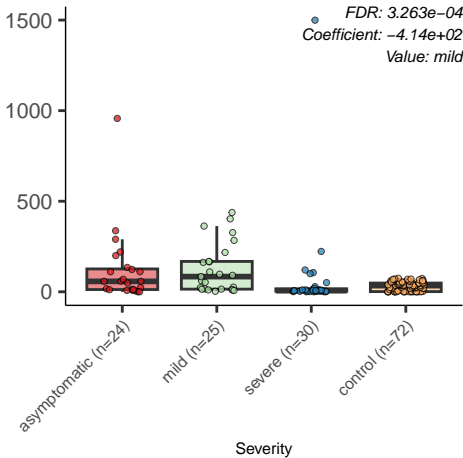

tes.c\_\_Clostridia.o\_\_Eubacteriales.f\_\_Oscillospiraceae.g\_\_Ruthenib

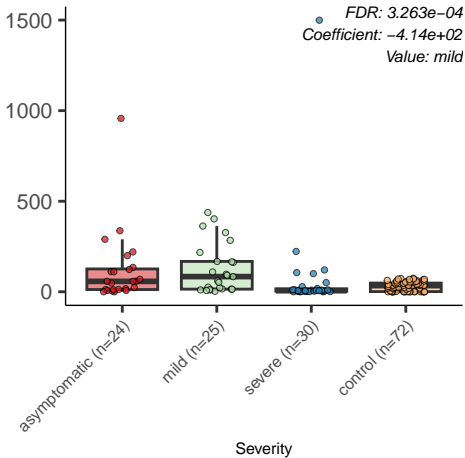



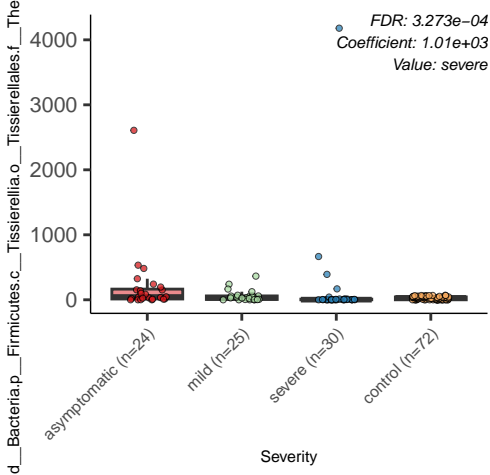

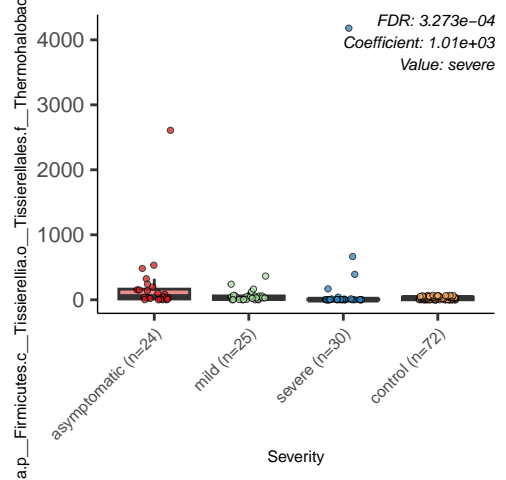

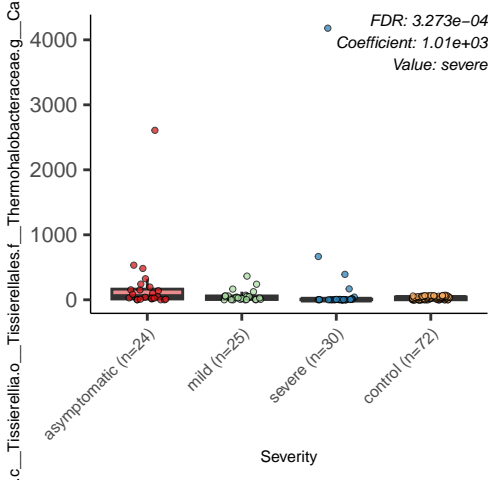

ia.p\_\_Bacteroidetes.c\_\_Chitinophagia.o\_\_Chitinophagales.f\_\_Chitin

*FDR: 3.302e-04*  
*Coefficient: -6.59e+02*  
*Value: mild*

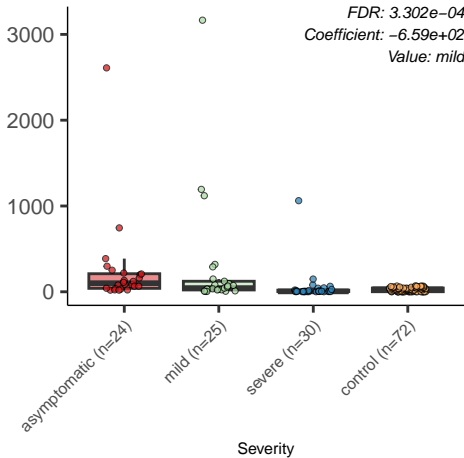

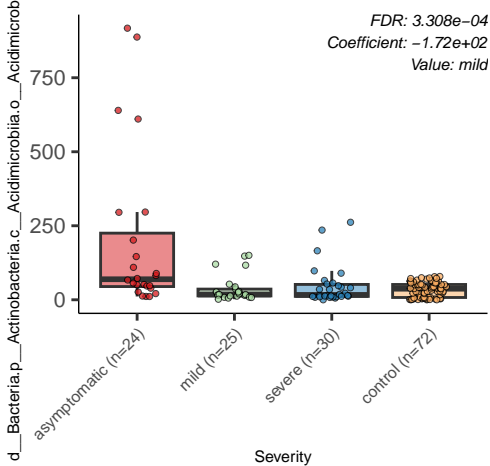

acteria.p\_\_Firmicutes.c\_\_Clostridia.o\_\_Eubacteriales.f\_\_Lachnosp

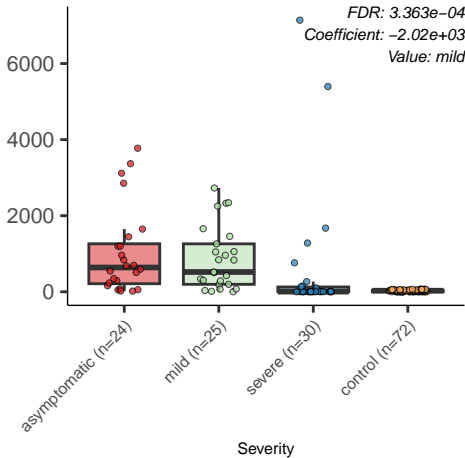

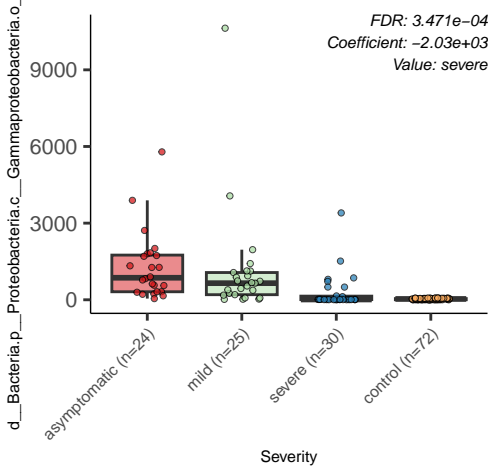

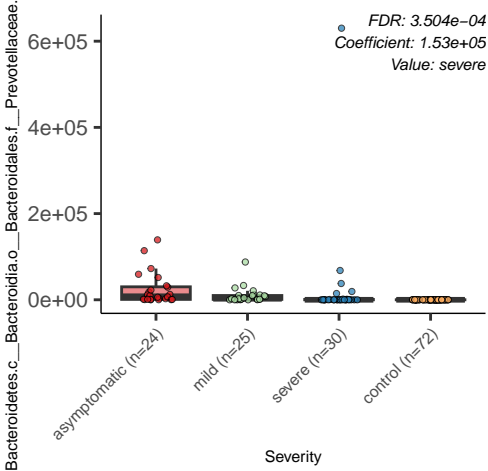



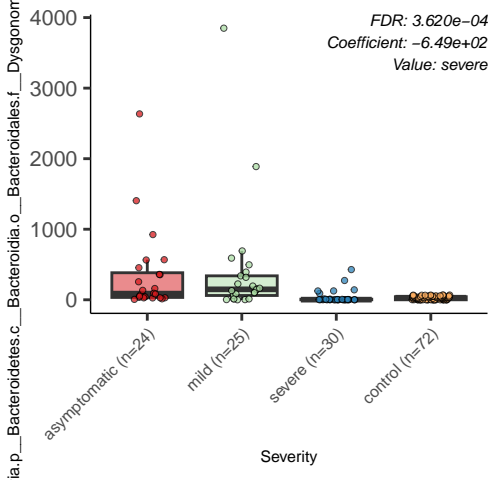

Bacteroidetes.c\_\_Bacteroidia.o\_\_Bacteroidales.f\_\_Prevotellaceae.g

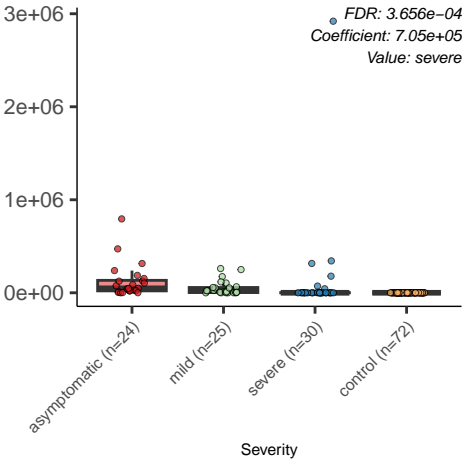

tes.c\_\_Bacilli.o\_\_Lactobacillales.f\_\_Streptococcaceae.g\_\_Streptococcus

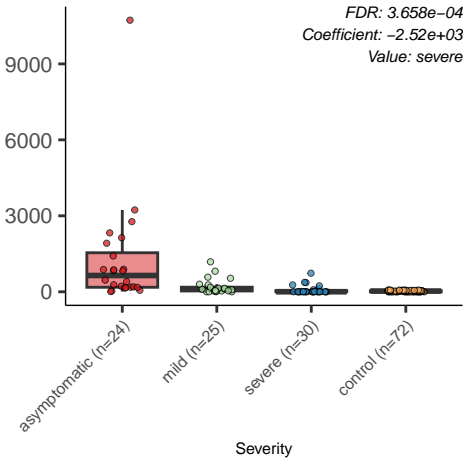

Bacteria.p\_\_Cyanobacteria.o\_\_Synechococcales.f\_\_Synechococcales

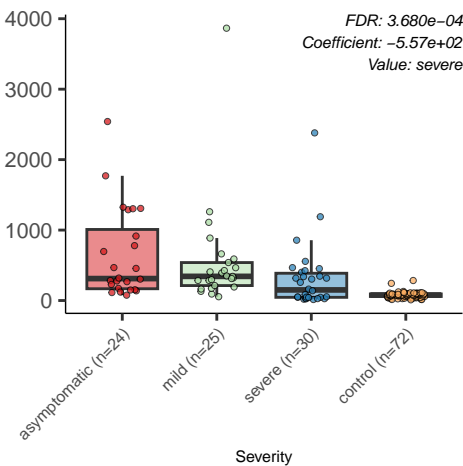

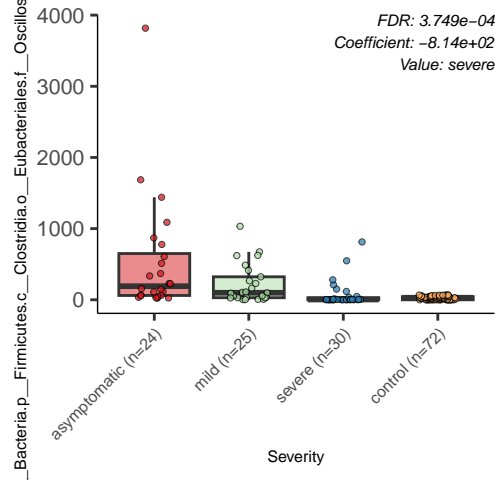

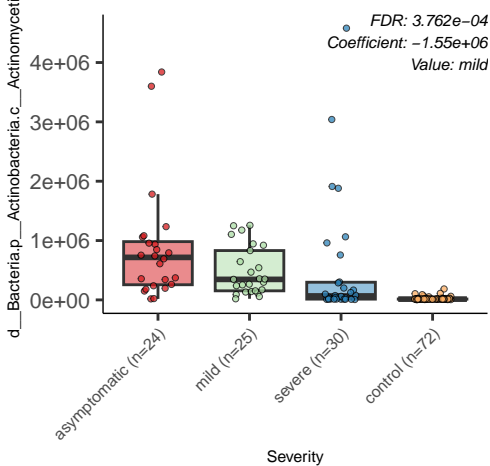

a.p.\_Proteobacteria.c\_Alphaproteobacteria.o\_Hyphomicrobiales.

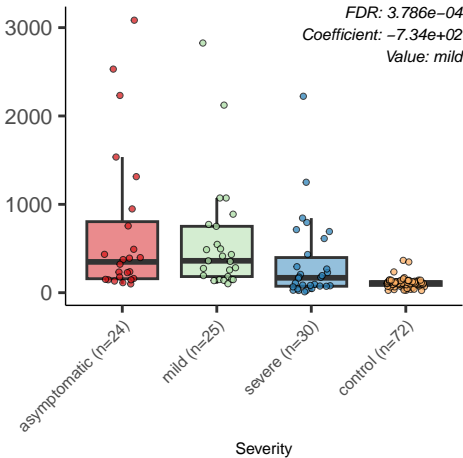

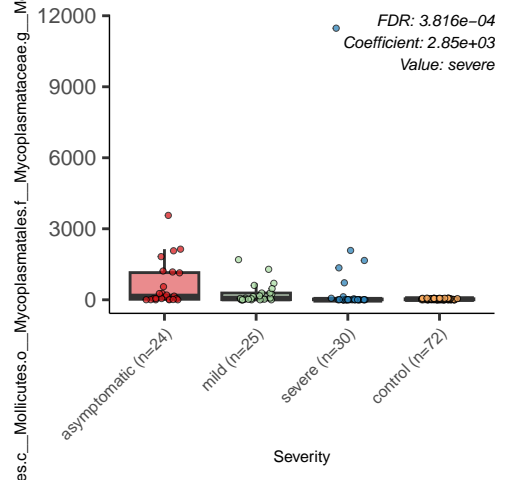



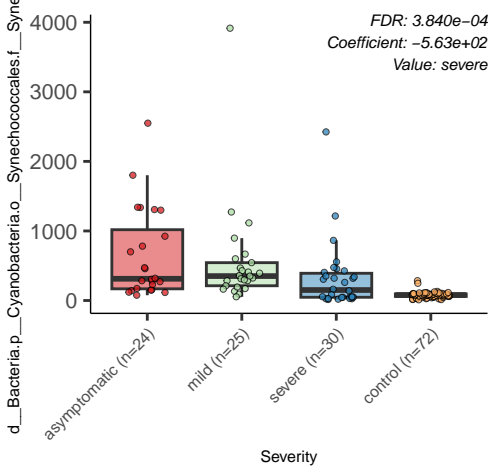

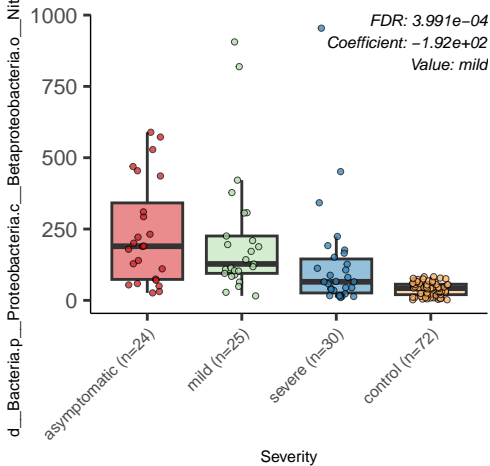

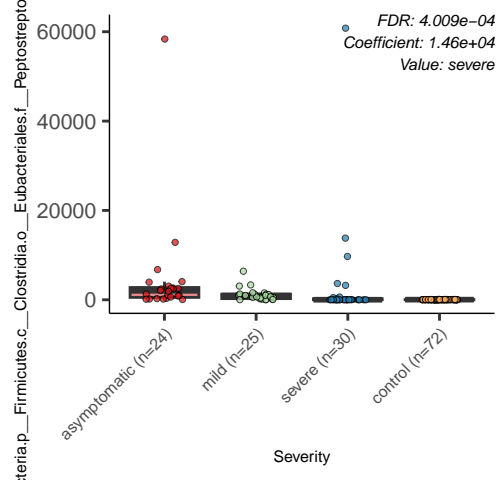

Bacteria.p\_Firmicutes.c\_Bacilli.o\_Lactobacillales.f\_\_Carnobacter

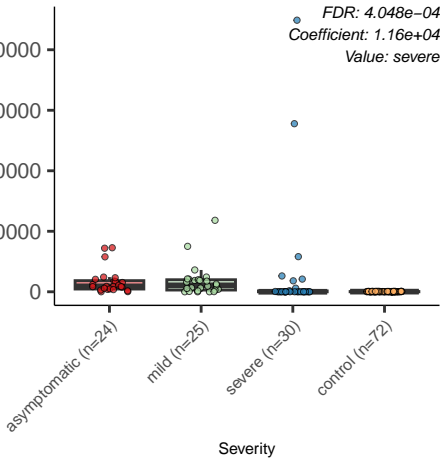

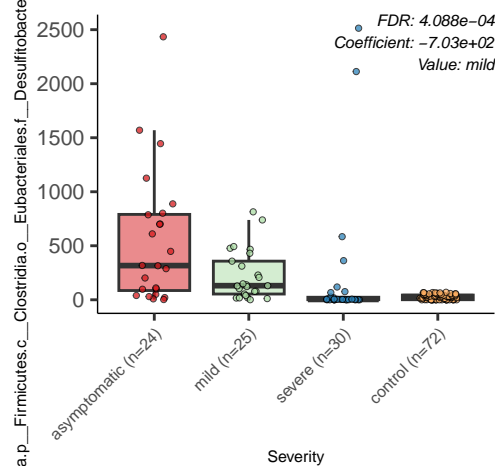

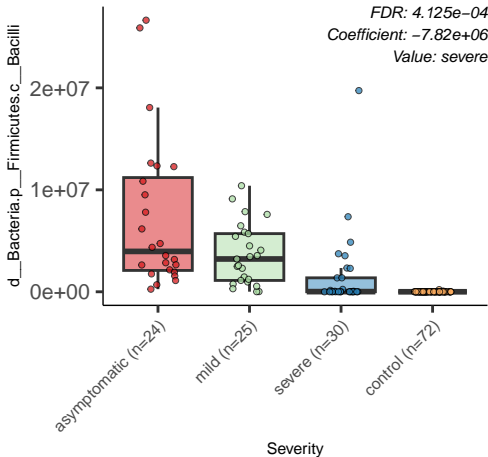

d\_Bacteria.p\_\_Chloroflexi

FDR:  $4.372e-04$   
Coefficient:  $-2.20e+03$   
Value: severe

asymptomatic (n=24)

mild (n=25)

severe (n=30)

control (n=72)

Severity

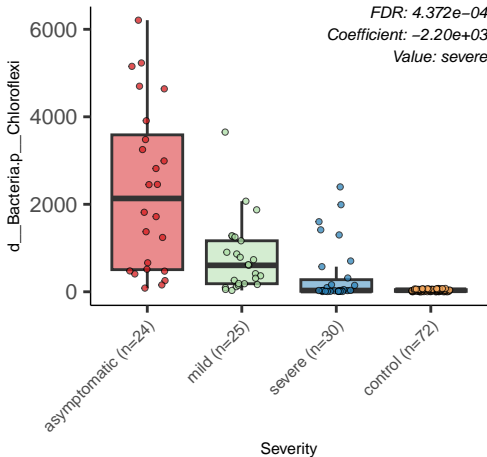

e.c.\_Thermotogae.o\_Thermotogales.f\_Thermotogaceae.g\_Pse

FDR:  $4.430e-04$   
Coefficient:  $-3.15e+02$   
Value: severe

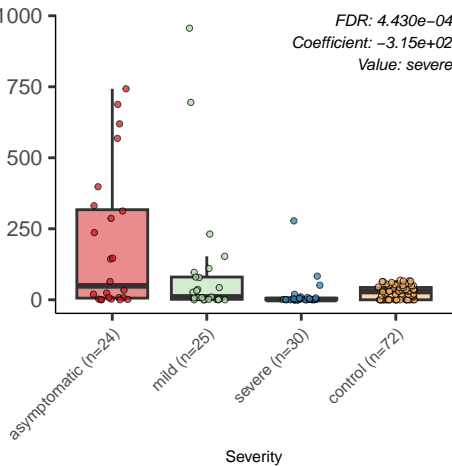



d\_Bacteria.p\_Gemmatimonadetes

FDR:  $4.489 \times 10^{-4}$   
Coefficient:  $-4.37 \times 10^2$   
Value: mild

1000

500

0

asymptomatic (n=24)

mild (n=25)

severe (n=30)

control (n=72)

Severity

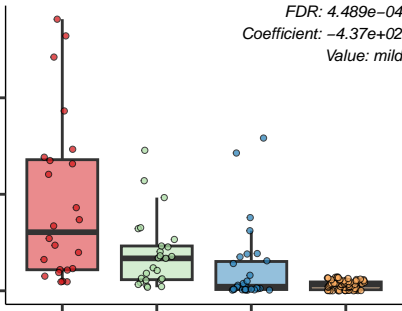

d\_Bacteria.p\_Gemmatimonadetes.c\_Gemmatimonadetes

1000

500

0

asymptomatic (n=24)

mild (n=25)

severe (n=30)

control (n=72)

Severity

FDR:  $4.489 \times 10^{-4}$

Coefficient:  $-4.37 \times 10^2$

Value: mild

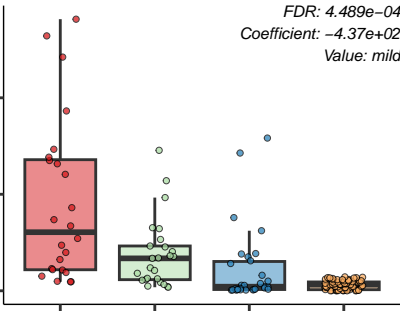

d\_Bacteria.p\_Gemmatimonadetes.c\_Gemmatimonadetes.o\_o

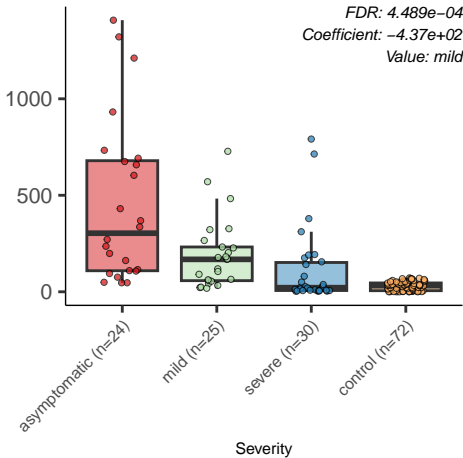

a.p\_\_Gemmatimonadetes.c\_\_Gemmatimonadetes.o\_\_Gemmatimon

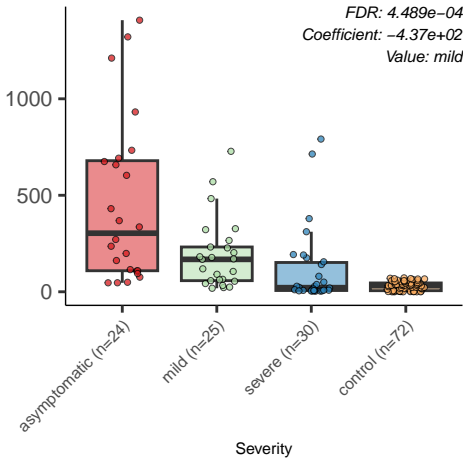

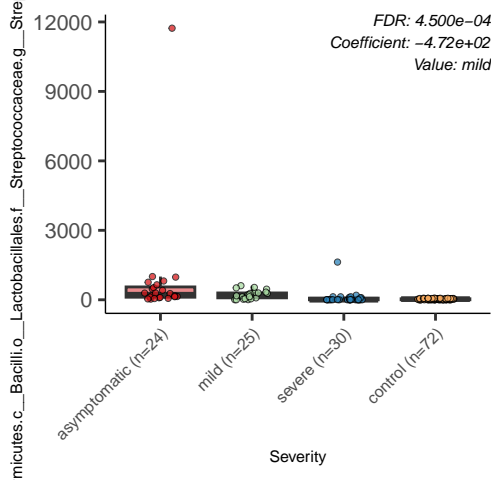

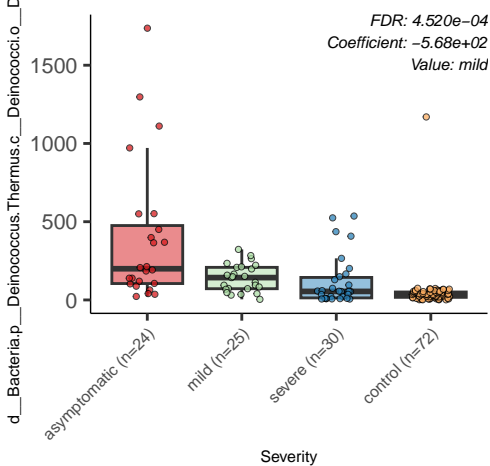

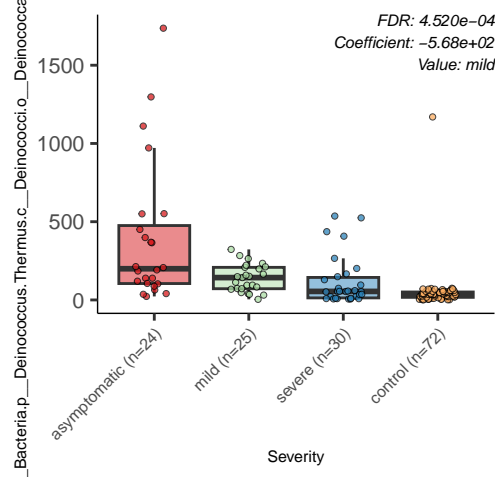

a.p\_Deinococcus.Thermus.c\_Deinococci.o\_Deinococcales.f\_D

*FDR: 4.520e-04*  
*Coefficient: -5.68e+02*  
*Value: mild*

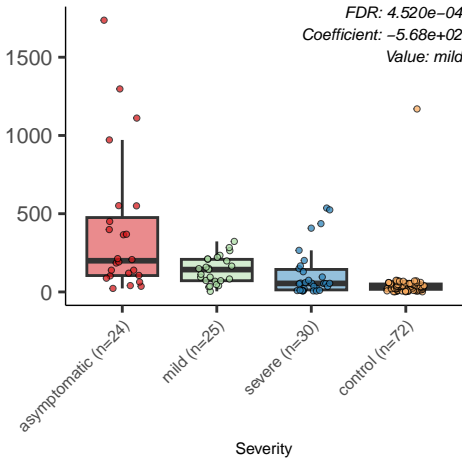



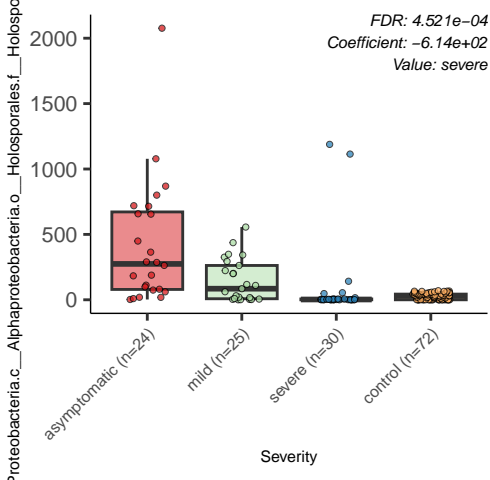

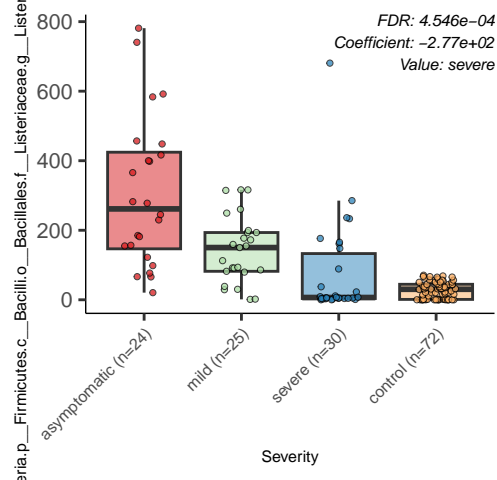

Firmicutes.c\_Clostridia.o\_Eubacteriales.f\_Clostridiaceae.g\_O

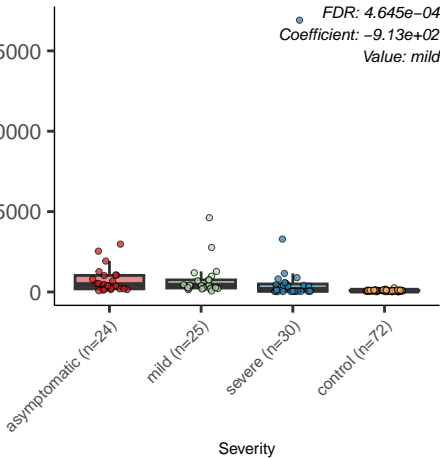

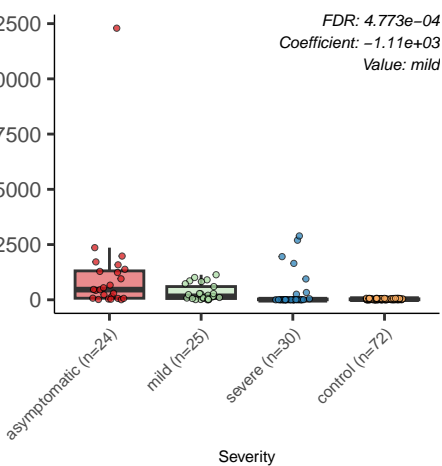

Firmicutes.c\_\_Clostridia.o\_\_Eubacteriales.f\_\_Lachnospiraceae.g

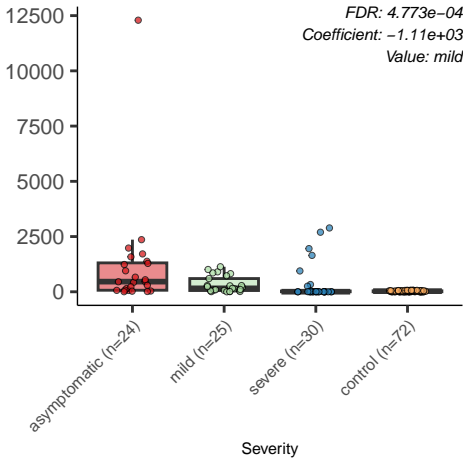

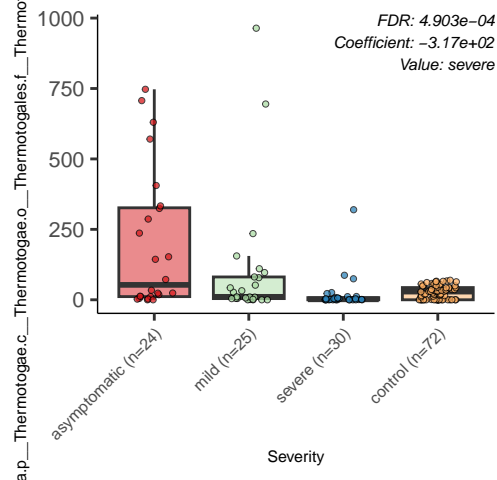

Firmicutes.c\_\_Clostridia.o\_\_Eubacteriales.f\_\_Clostridiaceae.g\_\_

*FDR: 4.926e-04*  
*Coefficient: -3.66e+02*  
*Value: mild*

1000

500

0

asymptomatic (n=24)

mild (n=25)

severe (n=30)

control (n=72)

Severity

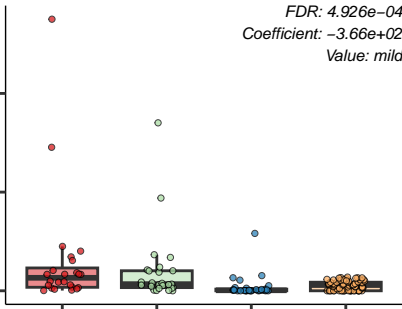

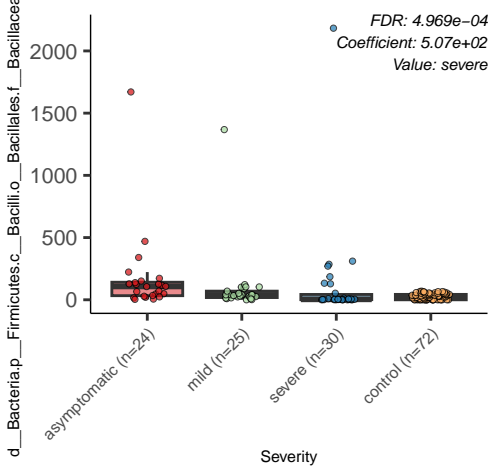



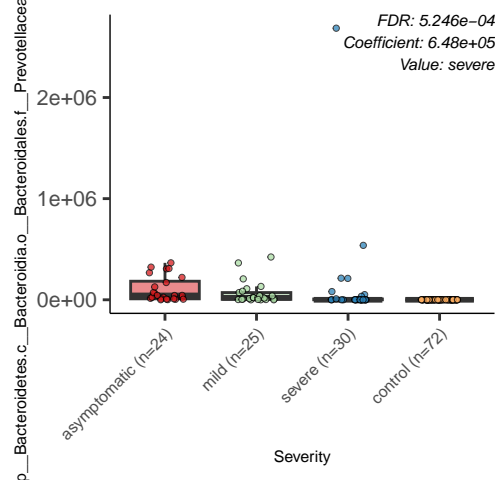

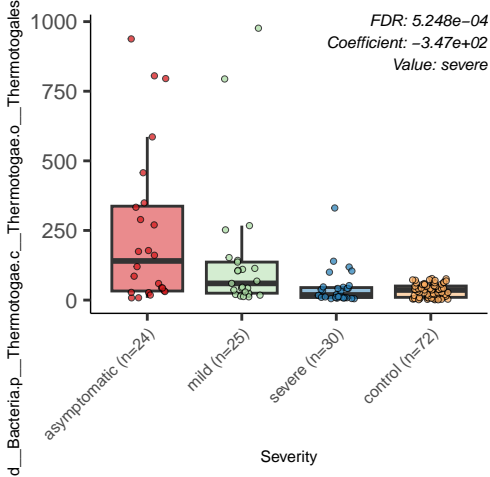

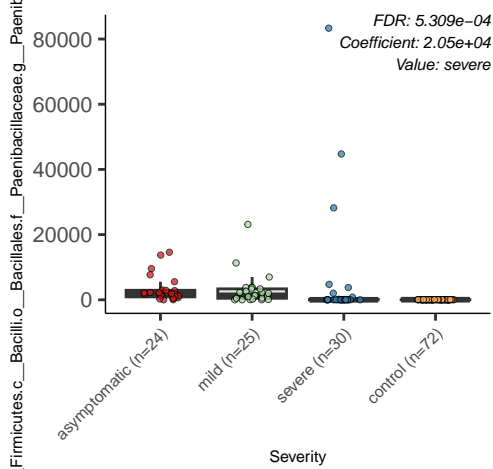

Bacteroidetes.c\_\_Bacteroidia.o\_\_Bacteroidales.f\_\_Prevotellaceae.g

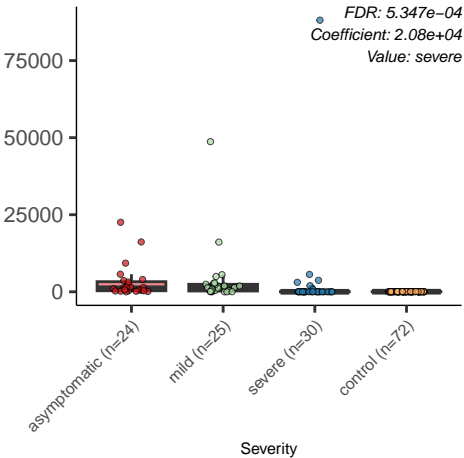

icutes.c\_\_Clostridia.o\_\_Eubacteriales.f\_\_Lachnospiraceae.g\_\_Med

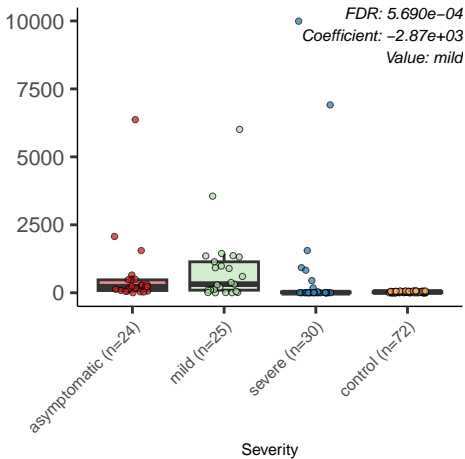

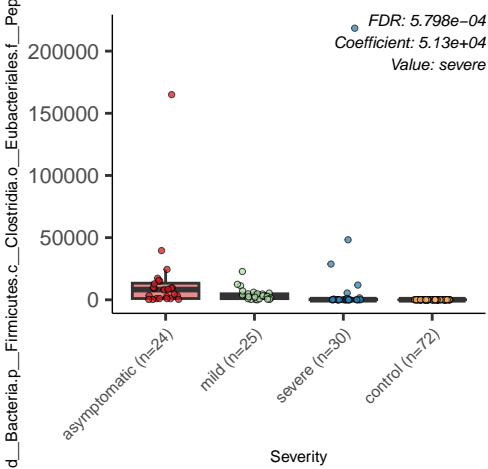

Bacteria.p\_\_Proteobacteria.c\_\_Gammaproteobacteria.o\_\_Thiotricha

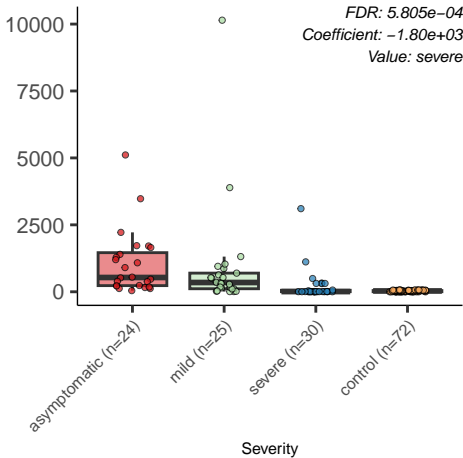

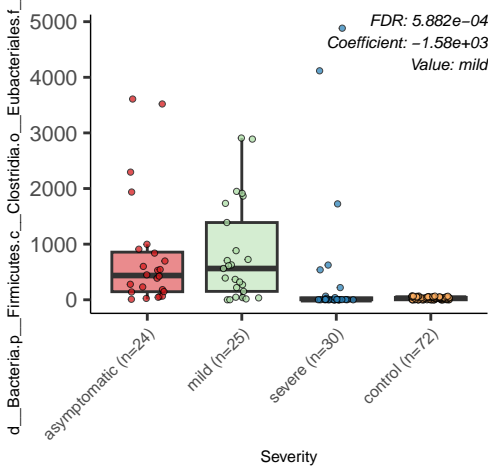



Bacteria.p\_Firmicutes.c\_Clostridia.o\_Eubacteriales.f\_Lachnos

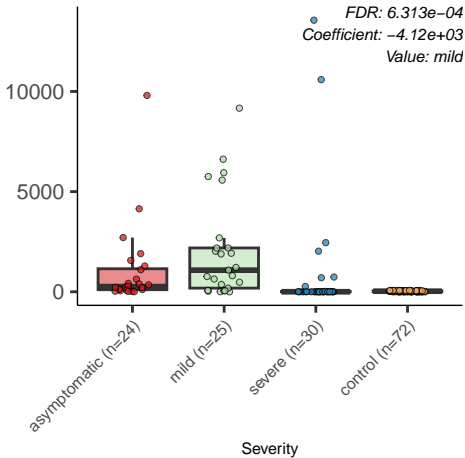

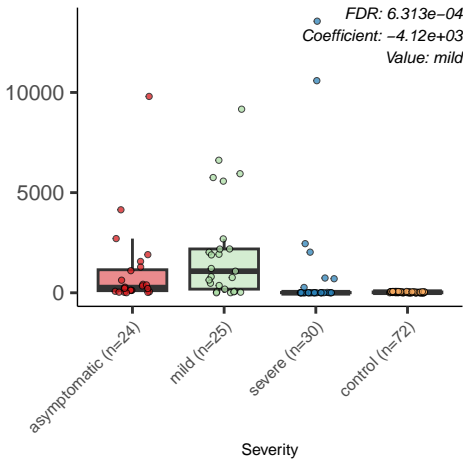

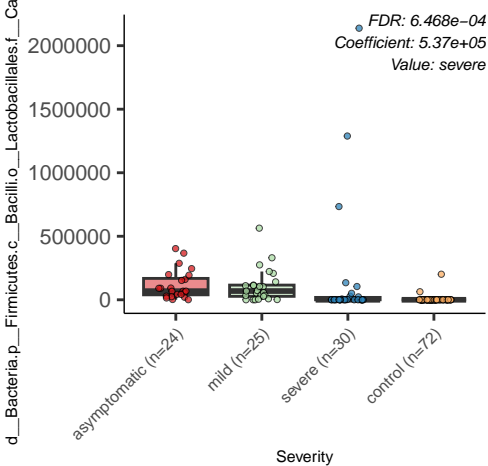

Bacteria.p\_\_Planctomycetes.c\_\_Planctomycetia.o\_\_Pirellulales.f\_\_F

*FDR: 6.648e-04*  
*Coefficient: -4.56e+02*  
*Value: severe*

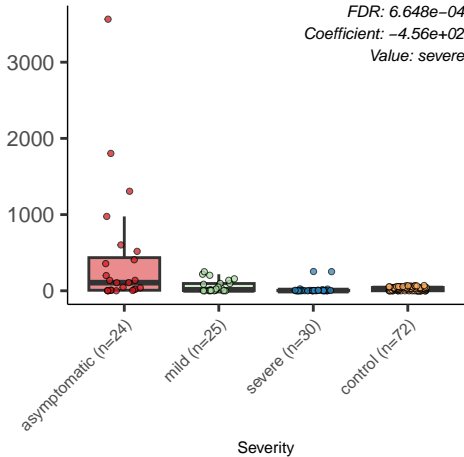

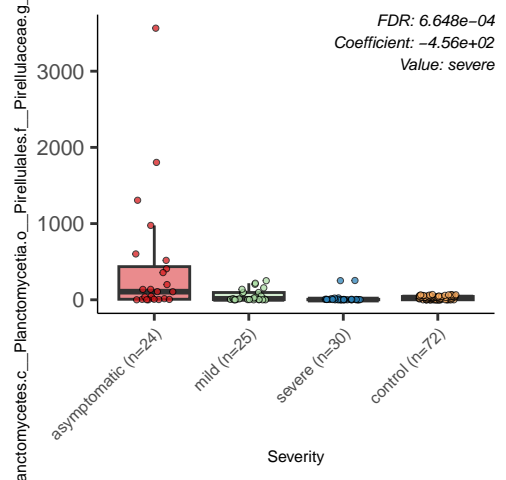

d\_Bacteria.p\_Cyanobacteria.o\_Oscillatoriales.f\_Oscillatoria

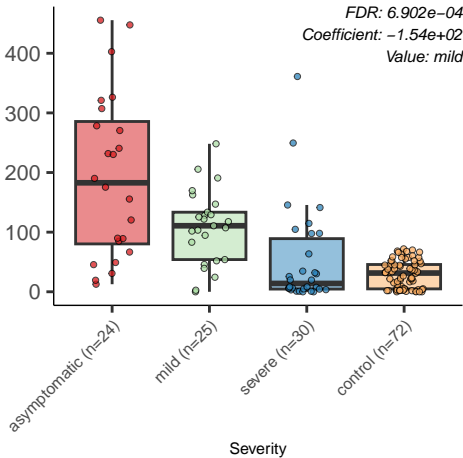

Gammaproteobacteria.o\_\_Pseudomonadales.f\_\_Pseudomonadaceae

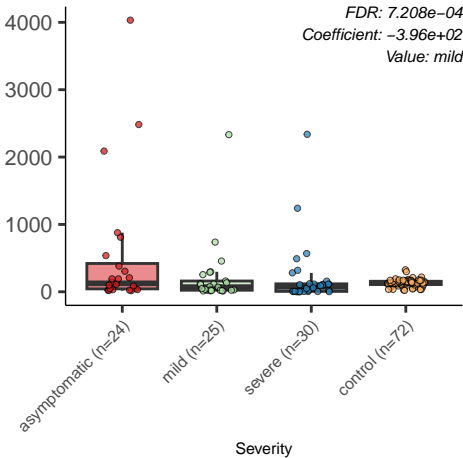

irmicutes.c\_\_Bacilli.o\_\_Lactobacillales.f\_\_Carnobacteriaceae.g\_\_G

1500000

1000000

500000

0

FDR: 7.252e-04

Coefficient: 4.26e+05

Value: severe

asymptomatic (n=24)

mild (n=25)

severe (n=30)

control (n=72)

Severity

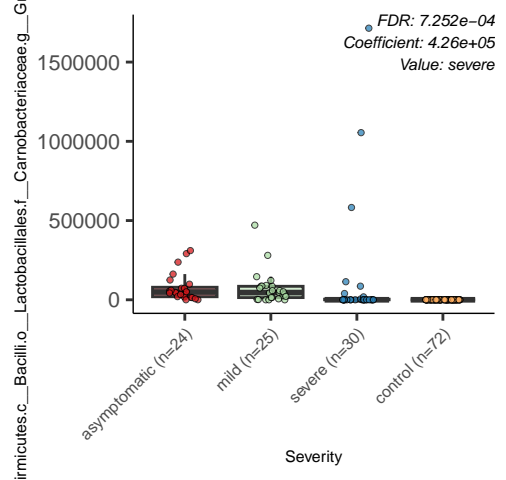



acteria.p\_Firmicutes.c\_Clostridia.o\_Eubacteriales.f\_Peptostrept

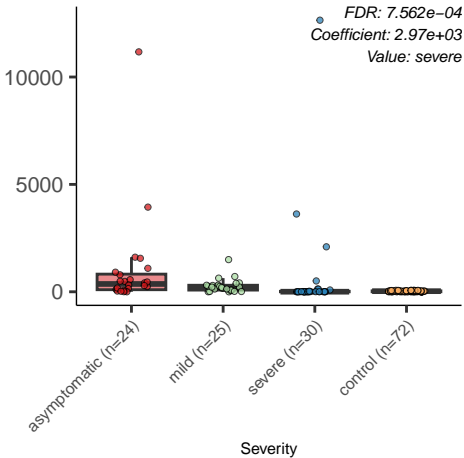

nicutes.c\_\_Clostridia.o\_\_Eubacteriales.f\_\_Peptostreptococcaceae.g

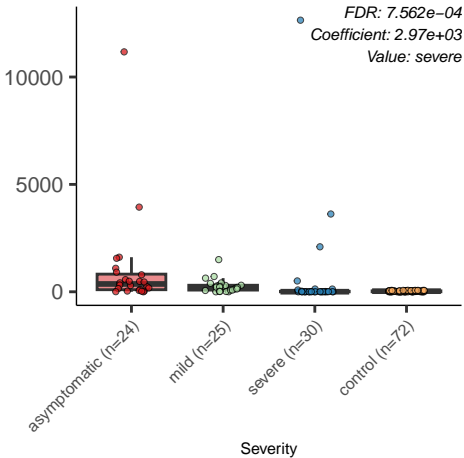

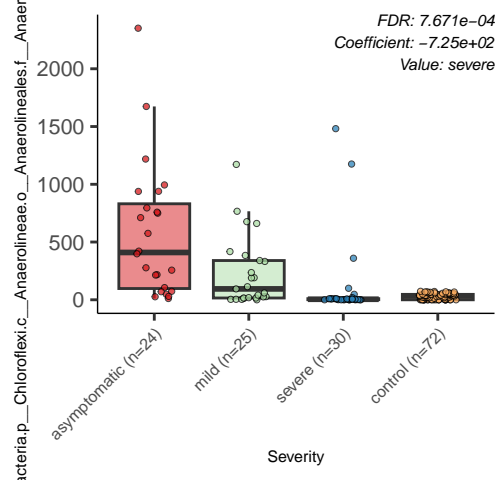

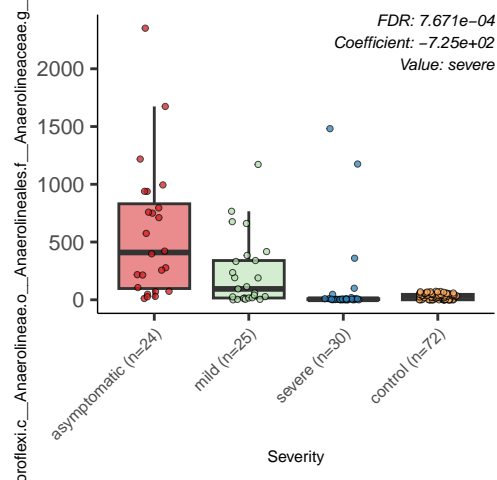

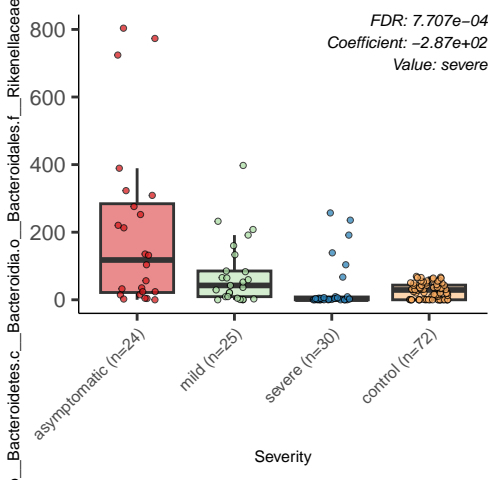

nicutes.c\_\_Clostridia.o\_\_Eubacteriales.f\_\_Peptostreptococcaceae.g

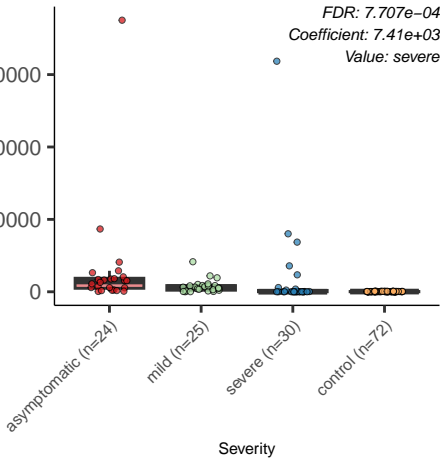

Bacteria.p\_Firmicutes.c\_Bacilli.o\_Lactobacillales.f\_Carnobacter

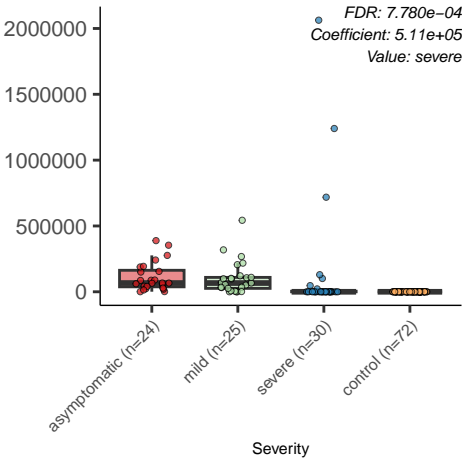

d\_\_Bacteria.p\_\_Proteobacteria.c\_\_Alphaproteobac

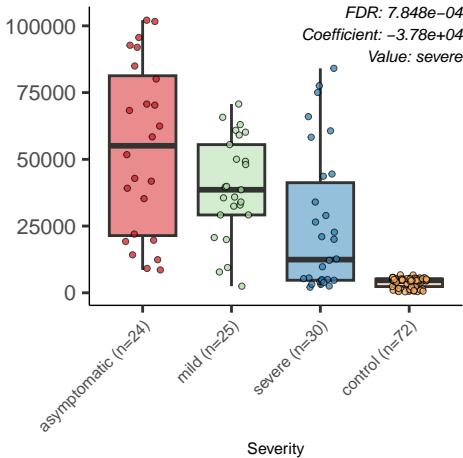



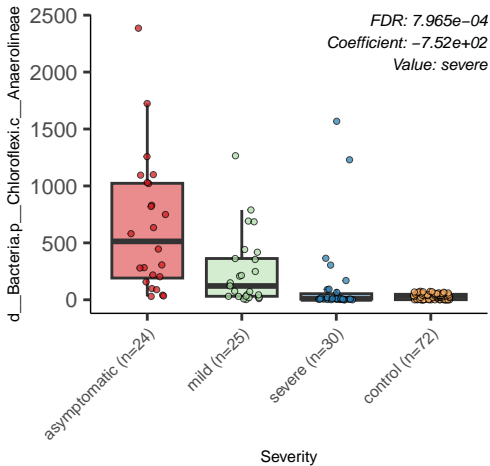

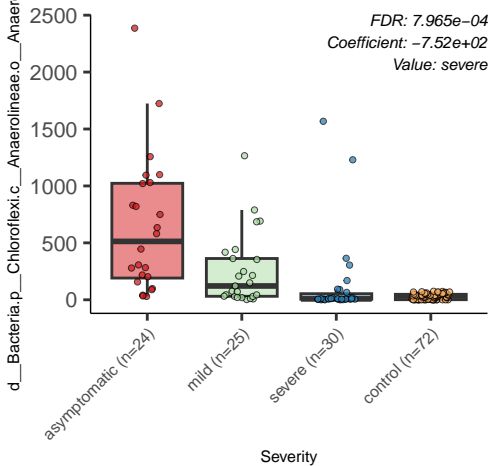

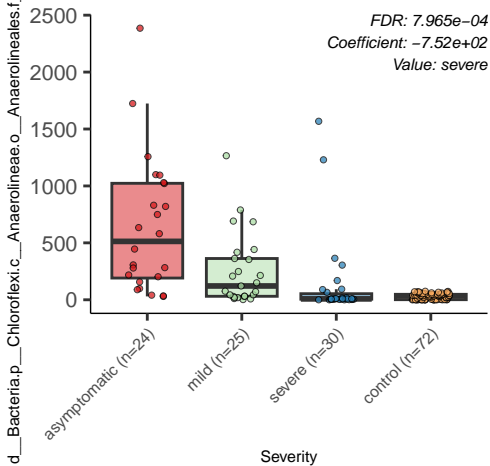

FDR:  $8.388e-04$   
Coefficient:  $-5.14e+03$   
Value: severe

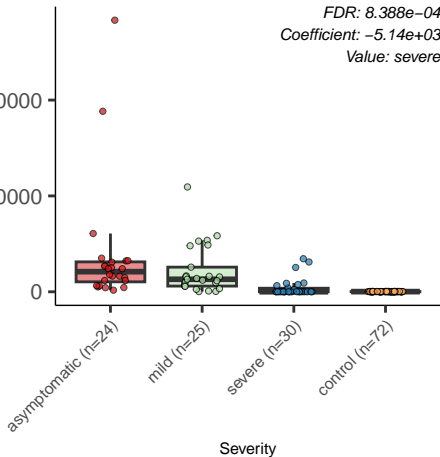

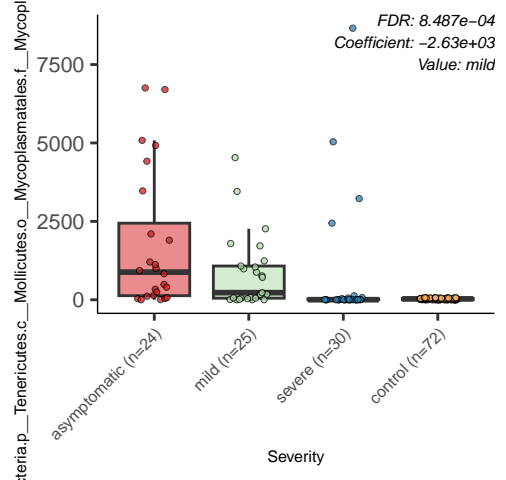

\_Bacteria.p\_\_Proteobacteria.c\_\_Alphaproteobacteria.o\_\_Rhodospirillum

*FDR: 8.842e-04*  
*Coefficient: -5.66e+02*  
*Value: severe*

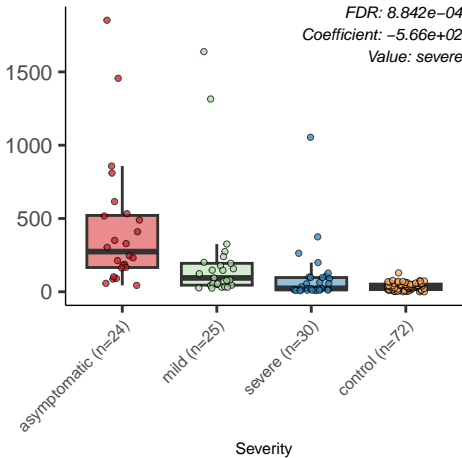

Bacteria.p\_Firmicutes.c\_Clostridia.o\_Eubacteriales.f\_Lachnosp

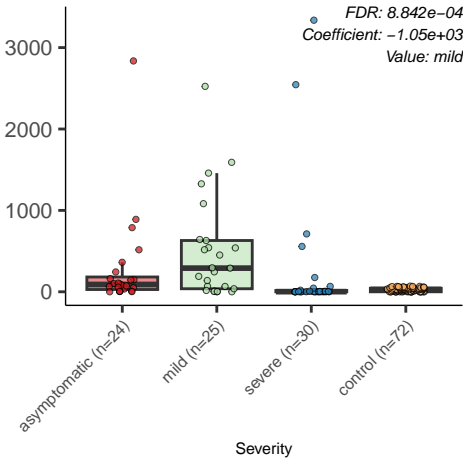

tes.c\_\_Clostridia.o\_\_Eubacteriales.f\_\_Lachnospiraceae.g\_\_Faecalib

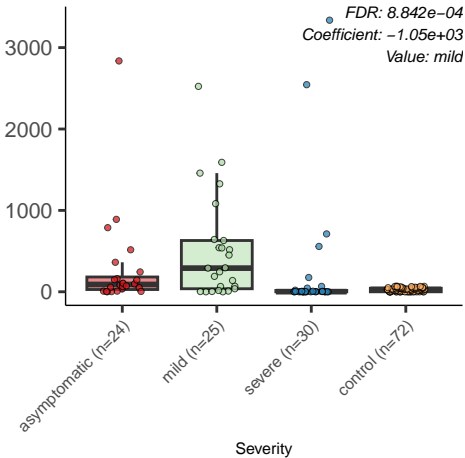



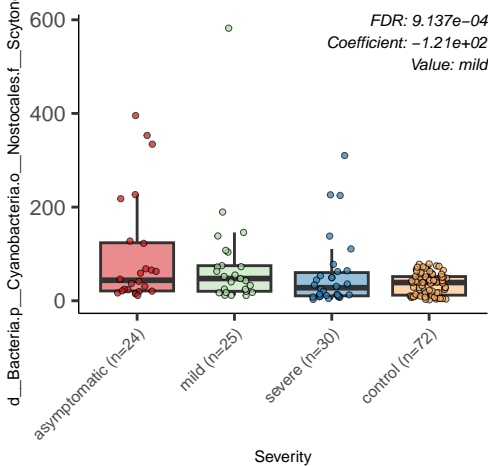

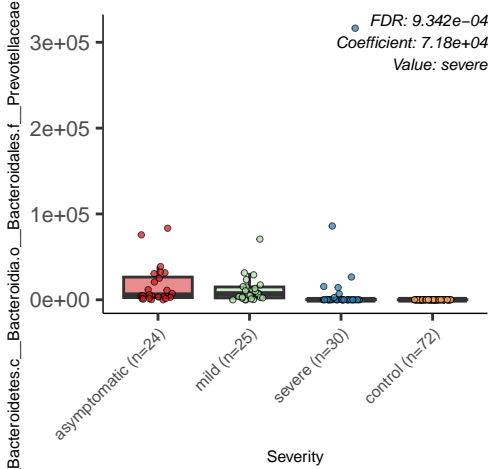

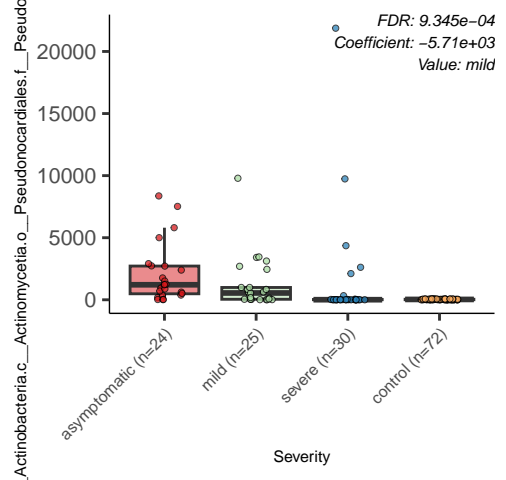

a.p\_\_Cyanobacteria.o\_\_Oscillatoriales.f\_\_Oscillatoriaceae.g\_\_Oscil

FDR:  $9.427e-04$   
Coefficient:  $-1.47e+02$   
Value: mild

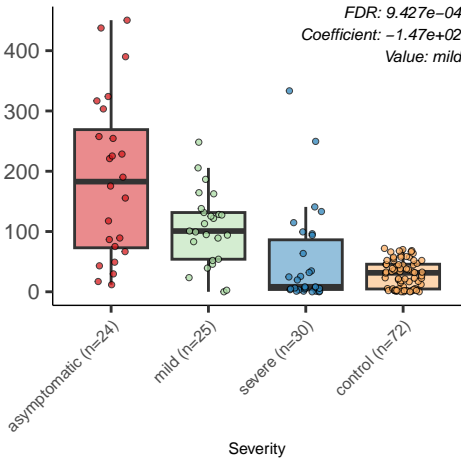

Firmicutes.c\_\_Bacilli.o\_\_Lactobacillales.f\_\_Streptococcaceae.g\_\_Str

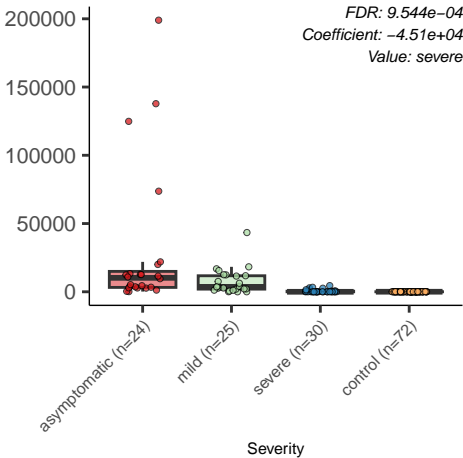

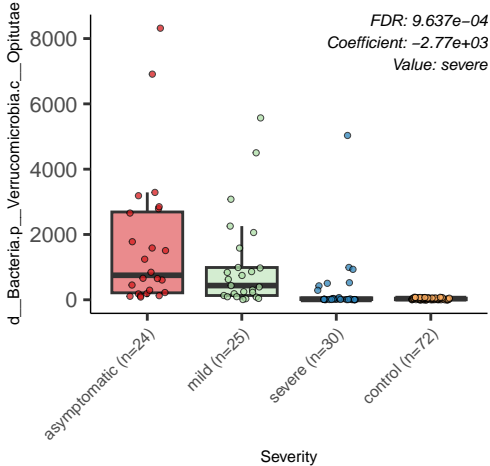

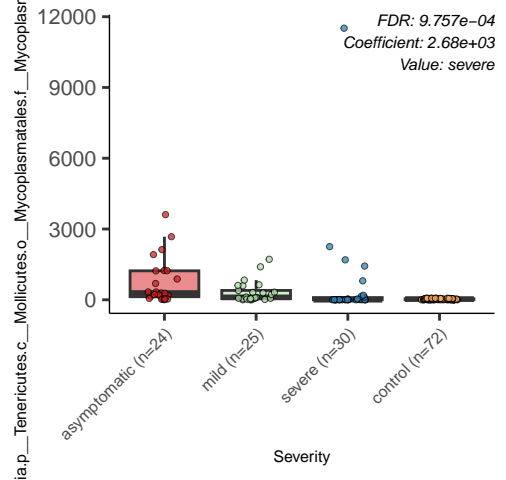

p\_Firmicutes.c\_Clostridia.o\_Thermoanaerobacterales.f\_Therm

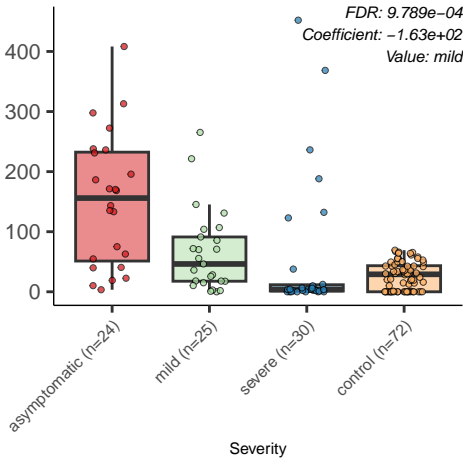



a.c.\_Alphaproteobacteria.o\_\_Hyphomicrobiales.f\_\_Rhizobiaceae.g

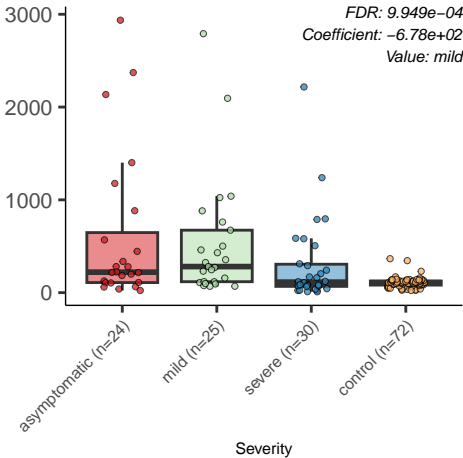

d\_Bacteria.p\_Firmicutes.c\_Bacilli.o\_Bacillales.f\_Thermo

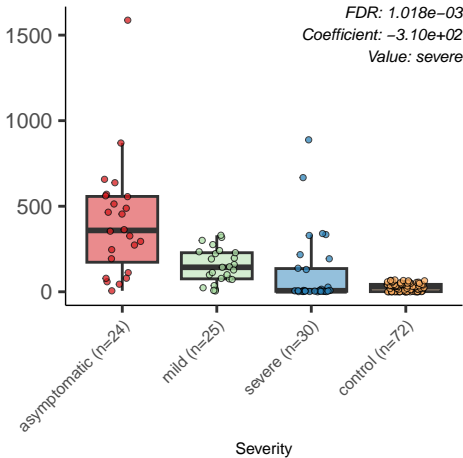

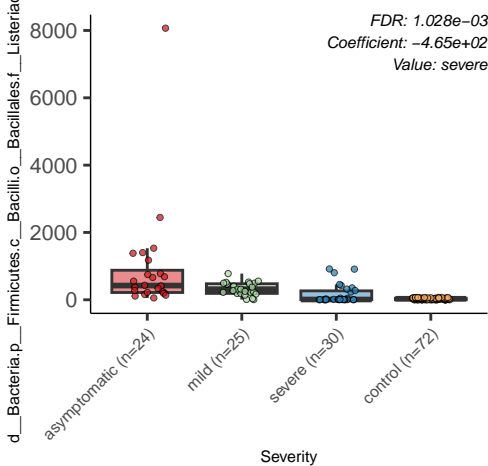

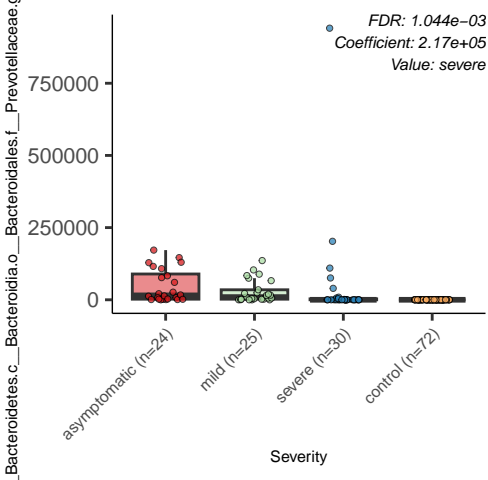

Bacteria.p\_\_Proteobacteria.c\_\_Deltaproteobacteria.o\_\_Myxococ

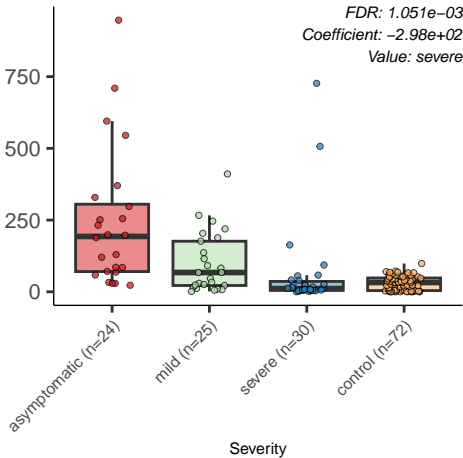

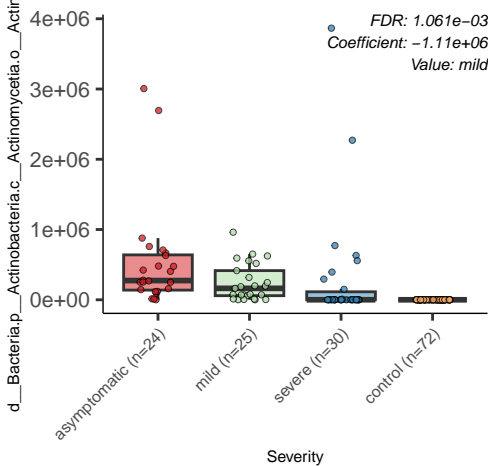

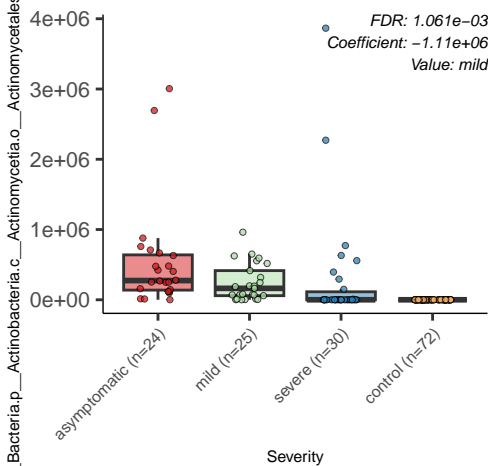

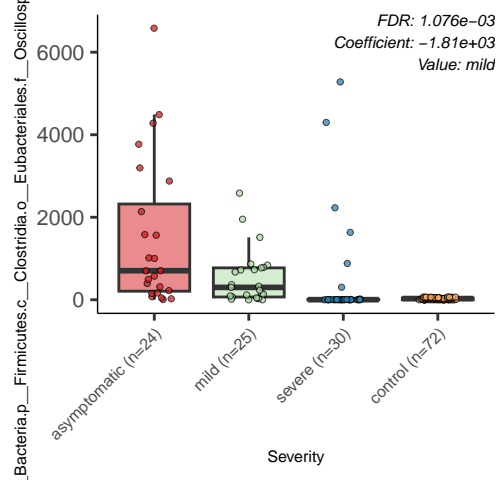



irmicutes.c\_\_Clostridia.o\_\_Eubacteriales.f\_\_Oscillospiraceae.g\_\_Mo

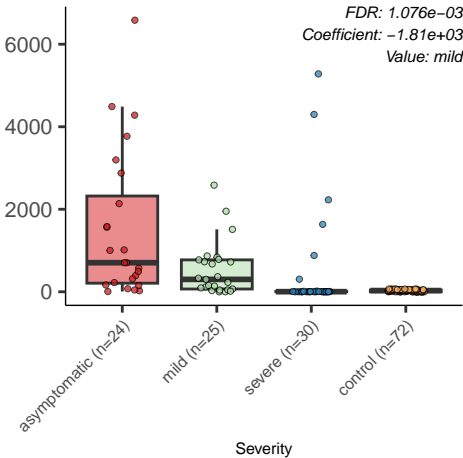

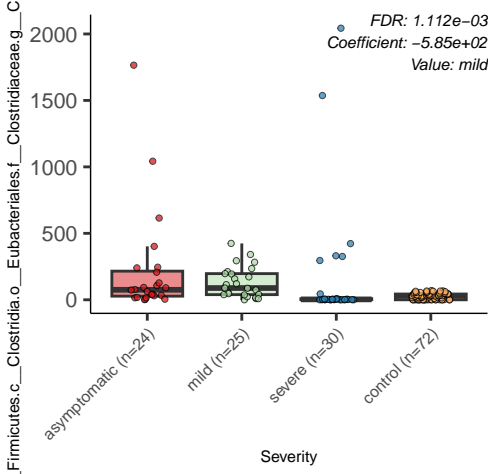

d\_Bacteria.p\_Candidatus.Saccharibacteria.g\_Candidatus

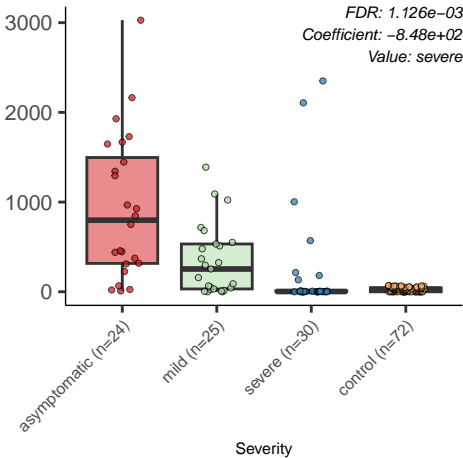

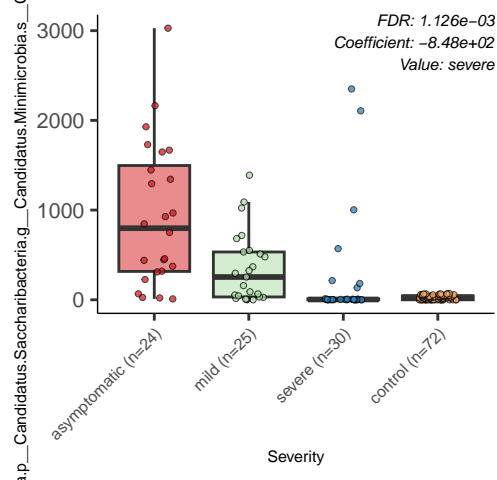

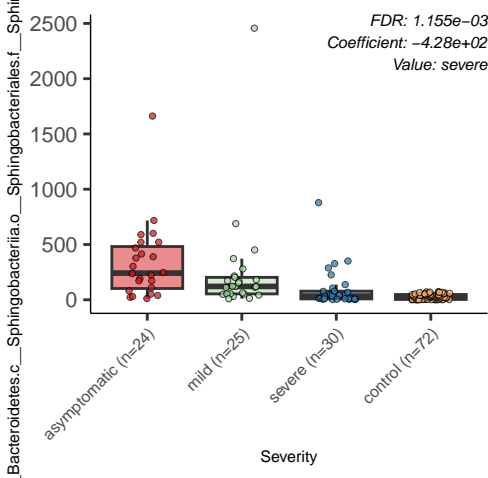

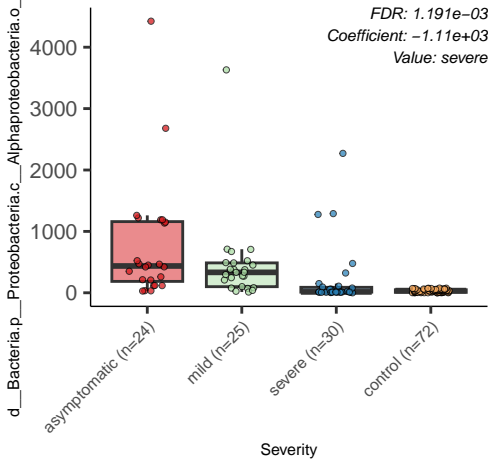

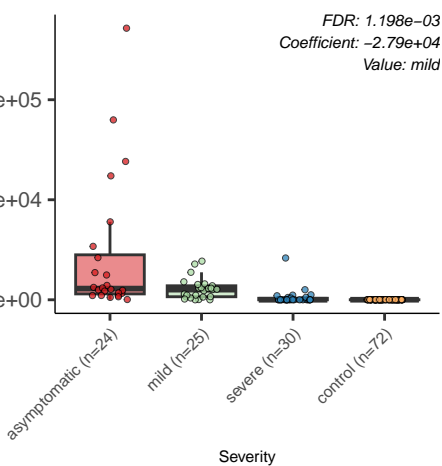

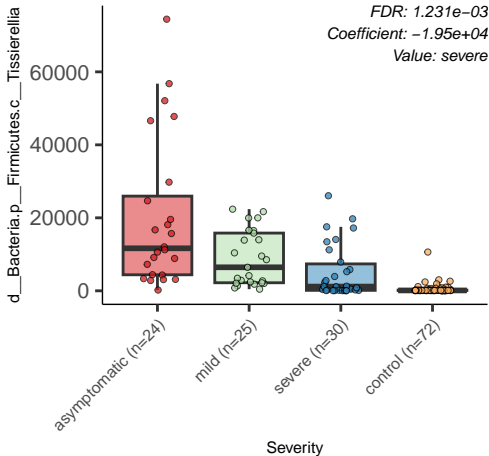



Bacteroidetes.c\_Bacteroidia.o\_Bacteroidales.f\_Muribaculaceae.g

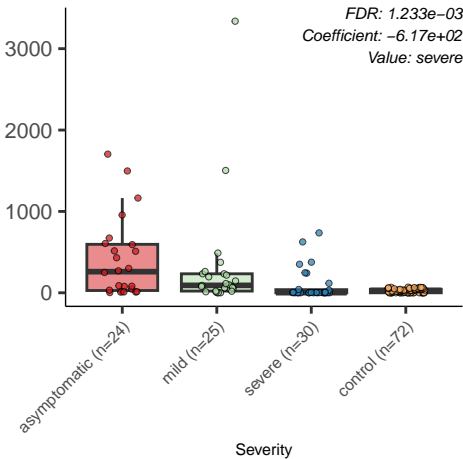

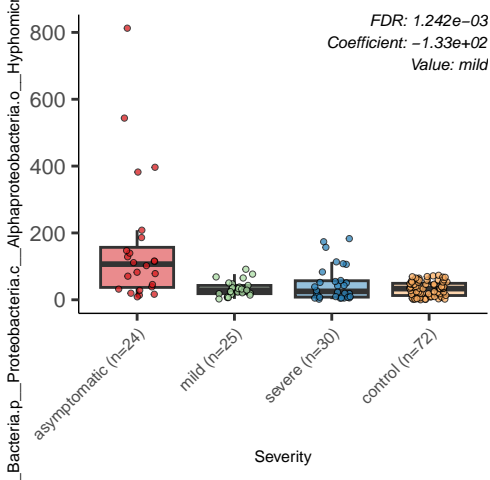

Bacteria.p\_\_Proteobacteria.c\_\_Alphaproteobacteria.o\_\_Holospor

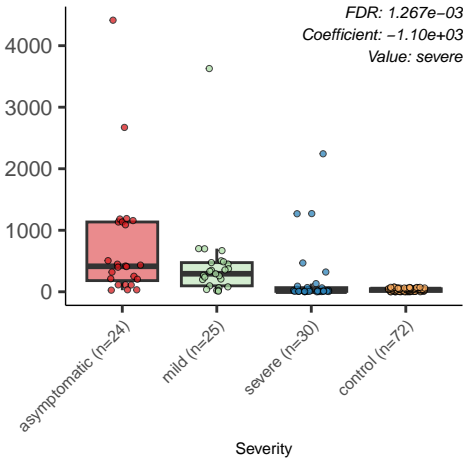

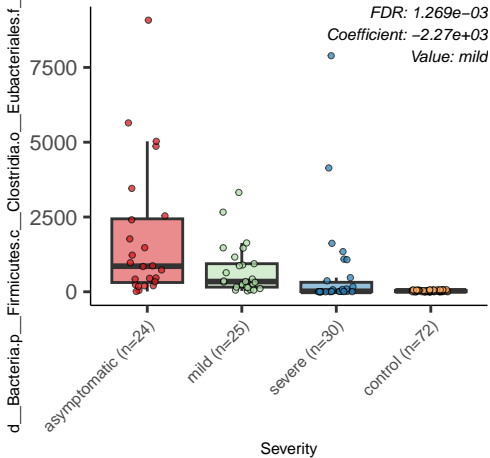

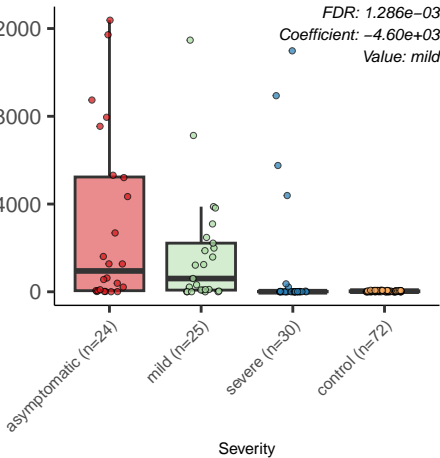

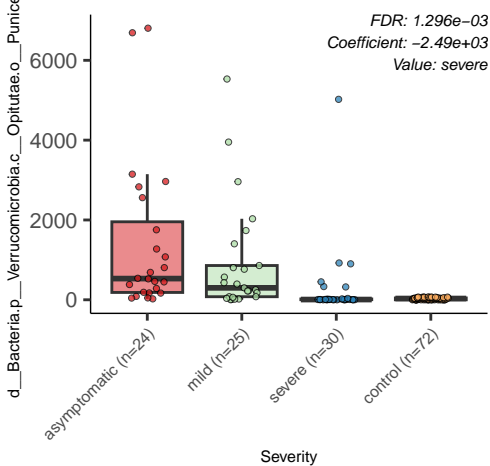

d\_Bacteria.p\_\_Verrucomicrobia.c\_\_Opitutae.o\_\_Puniceicoccales.f

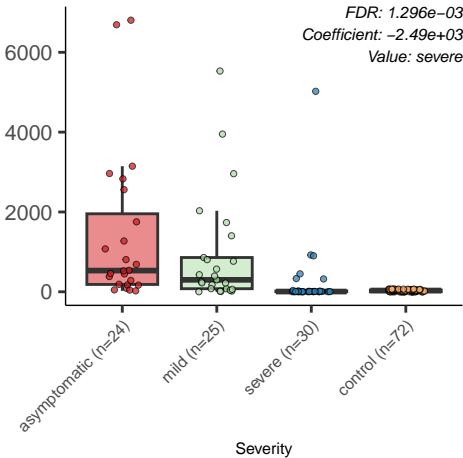

d\_Bacteria.p\_Firmicutes.c\_Bacilli.o\_Bacillales.f\_Bacillaceae

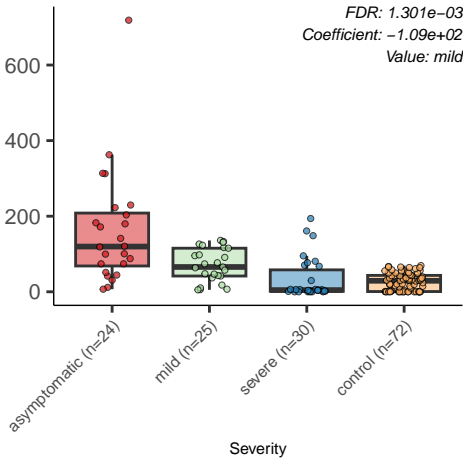



ia.p\_\_Firmicutes.c\_\_Bacilli.o\_\_Bacillales.f\_\_Bacillaceae.g\_\_Weizma

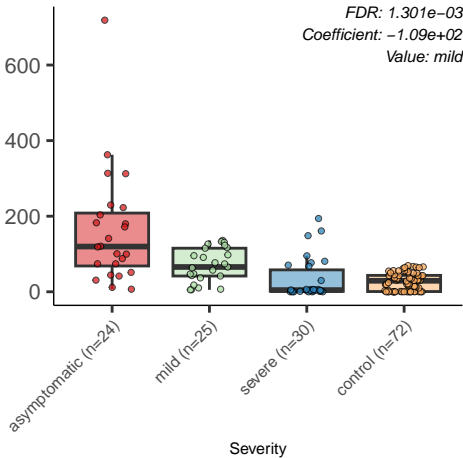

eria.p\_\_Synergistetes.c\_\_Synergistia.o\_\_Synergistales.f\_\_Synergis

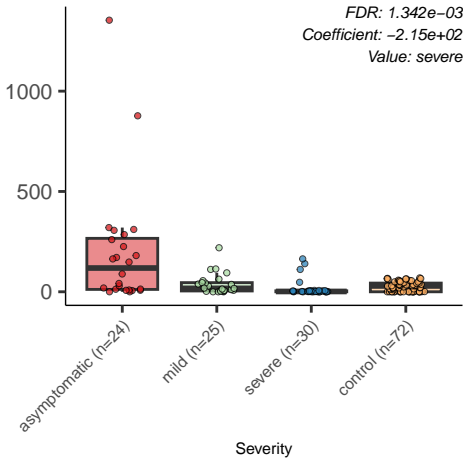

Bacteria.p\_Firmicutes.c\_Tissierellia.o\_Tissierellales.f\_Peptoni

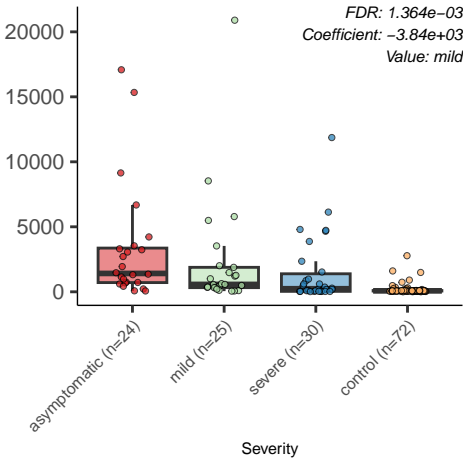

Firmicutes.c\_Bacilli.o\_Lactobacillales.f\_Streptococcaceae.g

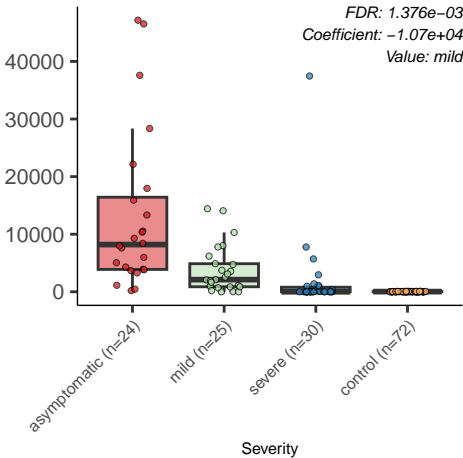

bacteria.c\_Actinomycetia.o\_Actinomycetales.f\_Actinomycetaceae

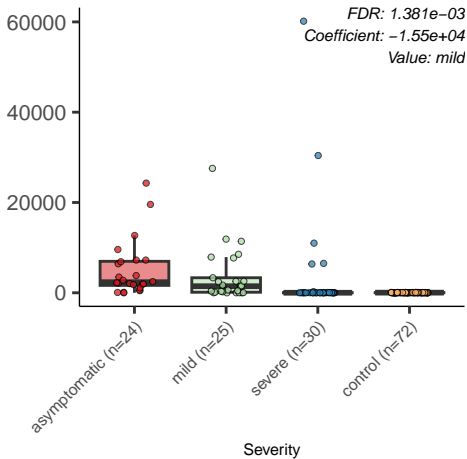

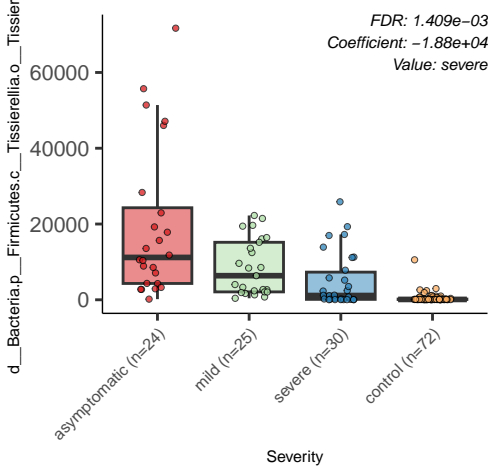

Firmicutes.c\_Clostridia.o\_Eubacteriales.f\_Clostridiaceae.g

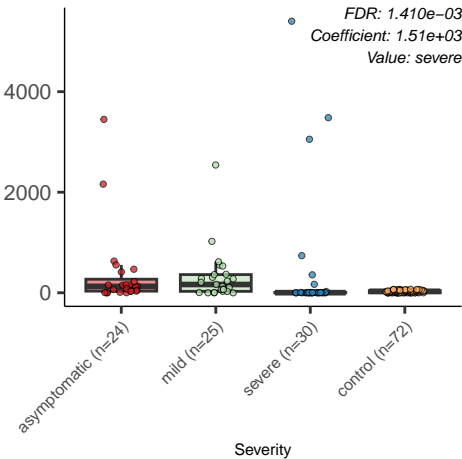

d\_Bacteria.p\_Firmicutes.c\_Bacilli.o\_Bacillales.f\_Bacillaceae

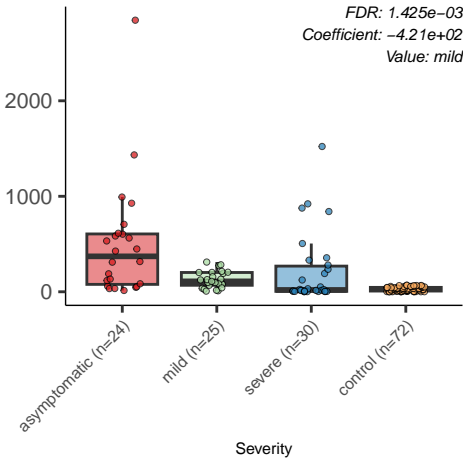



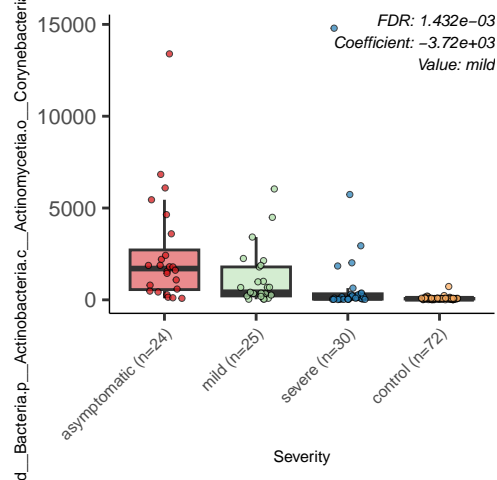

Bacteroidetes.c\_\_Bacteroidia.o\_\_Bacteroidales.f\_\_Prevotellaceae.g

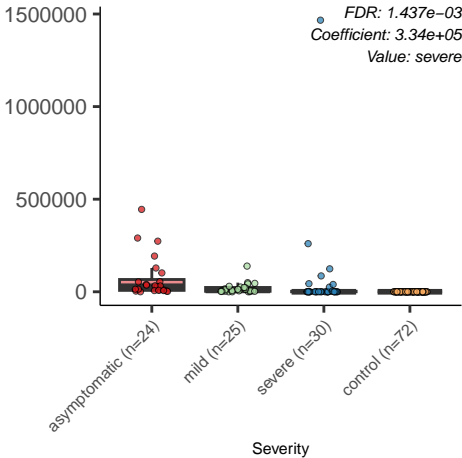

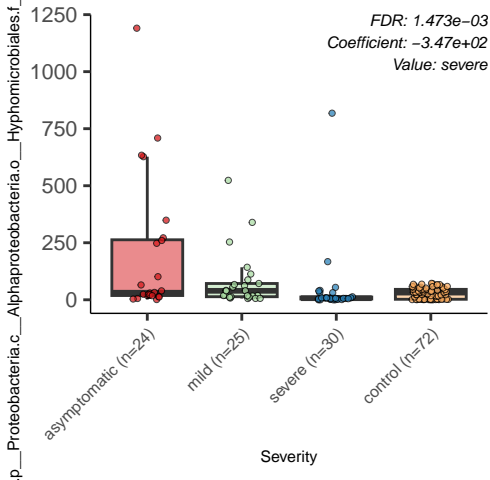

c\_Negativicutes.o\_\_Selenomonadales.f\_\_Selenomonadaceae.g\_\_S

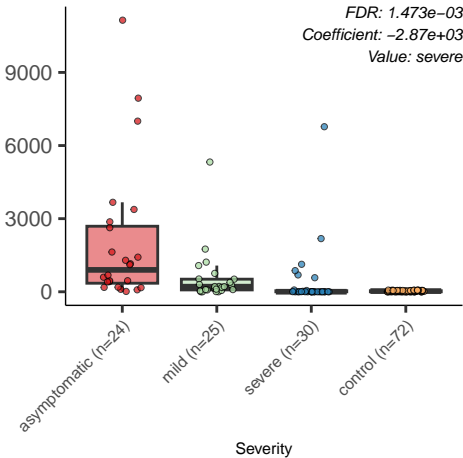

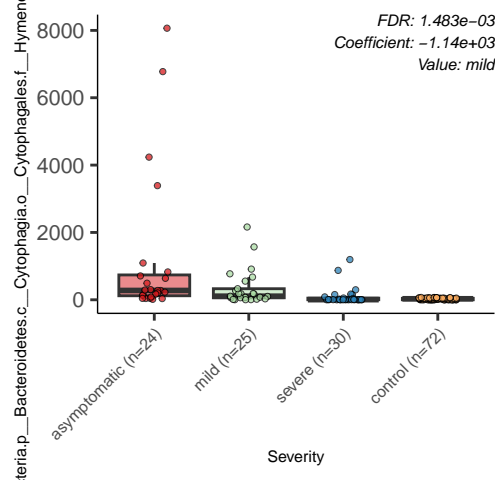

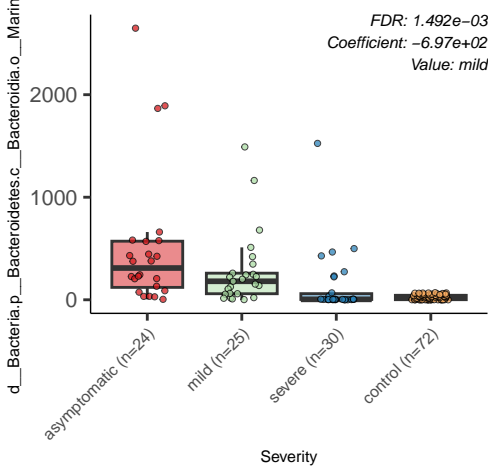

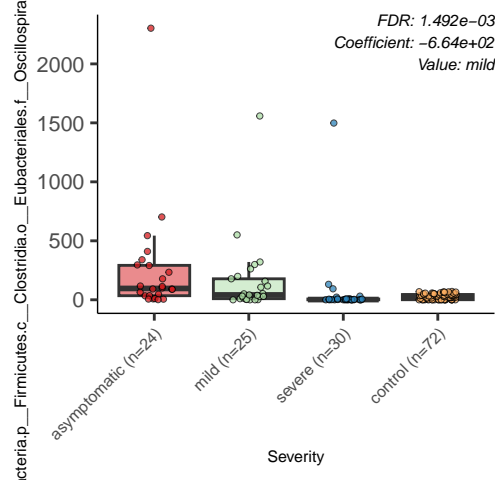

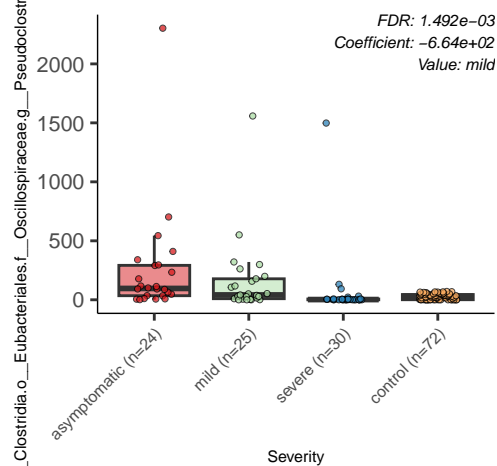



d\_\_Bacteria.p\_\_Bacteroidetes.c\_\_Bacteroidia.o\_\_Marinilabiales.

1000

500

0

asymptomatic (n=24)

mild (n=25)

severe (n=30)

control (n=72)

Severity

FDR:  $1.496e-03$   
Coefficient:  $-2.75e+02$   
Value: mild

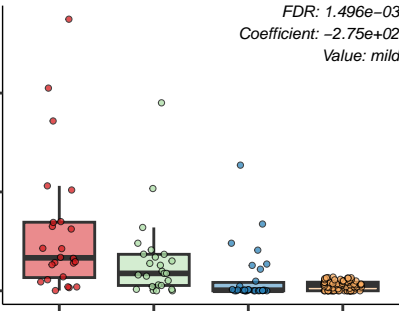

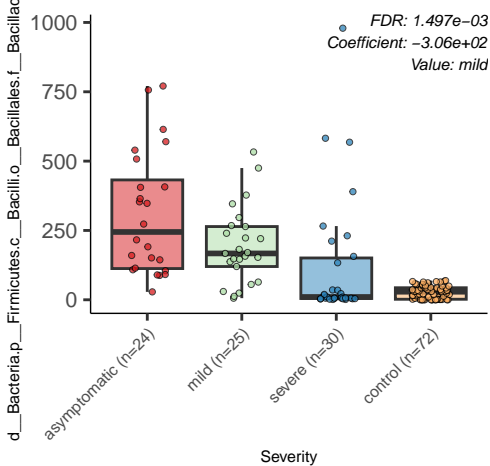

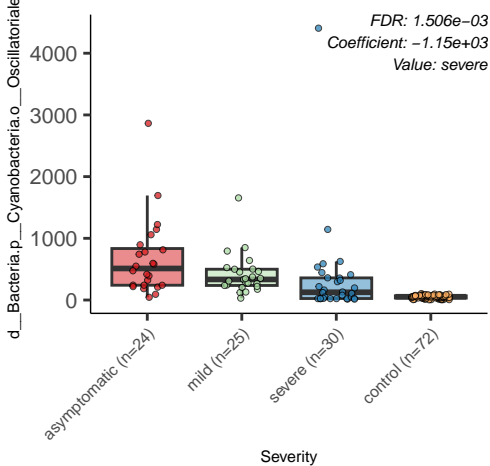

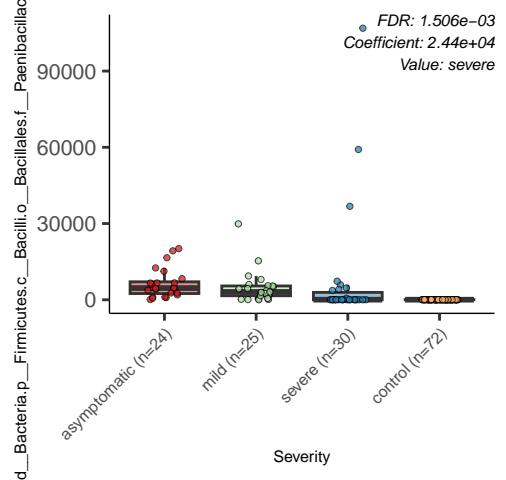

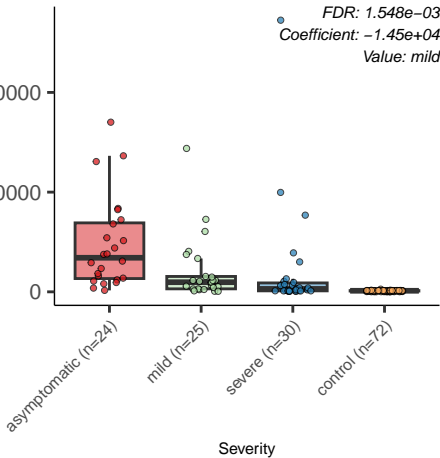

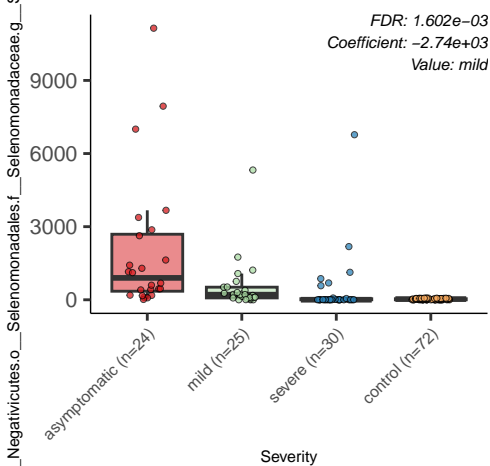

acteria.p\_\_Proteobacteria.c\_\_Gammaproteobacteria.o\_\_Alteromon

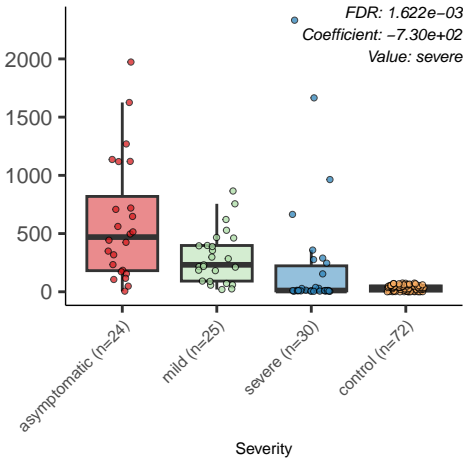

a.c\_Fusobacteriia.o\_Fusobacteriales.f\_Fusobacteriaceae.g\_Fu

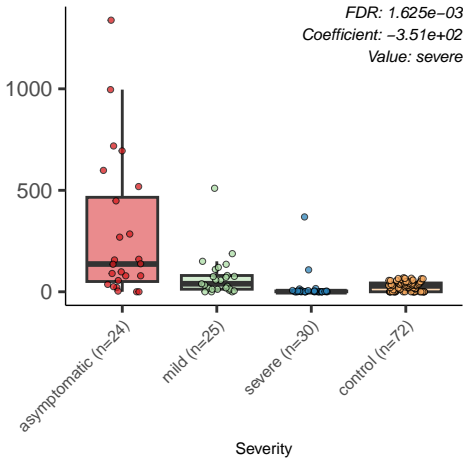



ria.p\_\_Firmicutes.c\_\_Erysipelotrichia.o\_\_Erysipelotrichales.f\_\_Erys

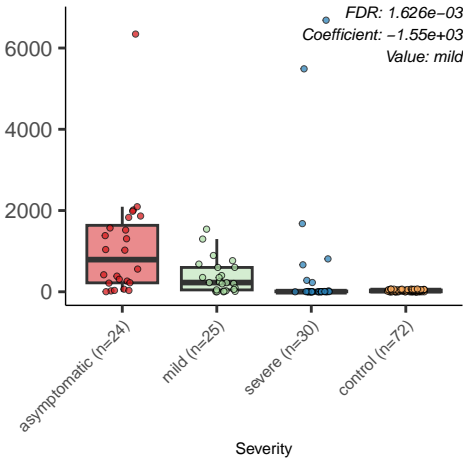

tes.c\_\_Erysipelotrichia.o\_\_Erysipelotrichales.f\_\_Erysipelotrichaceae

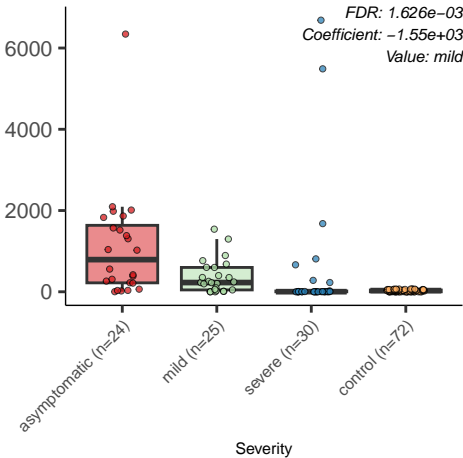

Bacteria.p\_Firmicutes.c\_Bacilli.o\_Lactobacillales.f\_Lactobacilla

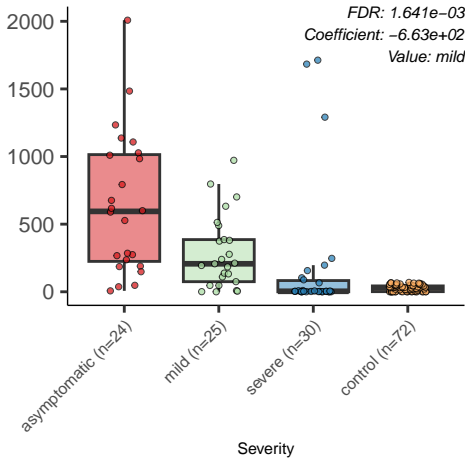

cut.es.c\_\_Bacilli.o\_\_Lactobacillales.f\_\_Lactobacillaceae.g\_\_Acetila

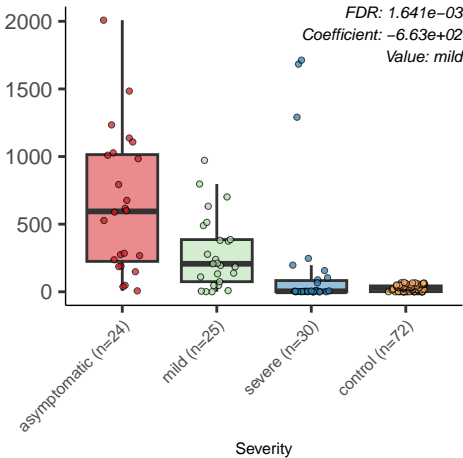

Gammaaproteobacteria.o\_Pseudomonadales.f\_Pseudomonadaceae

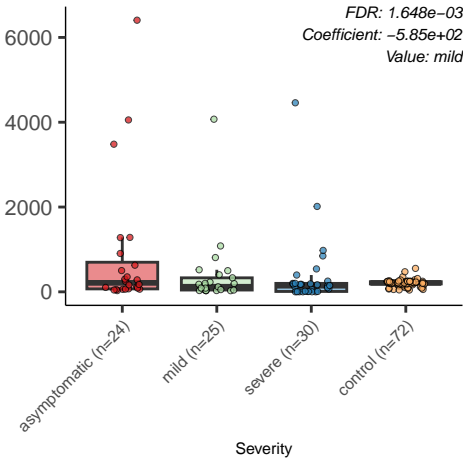

teria.c\_\_Fusobacteriia.o\_\_Fusobacteriales.f\_\_Fusobacteriaceae.g

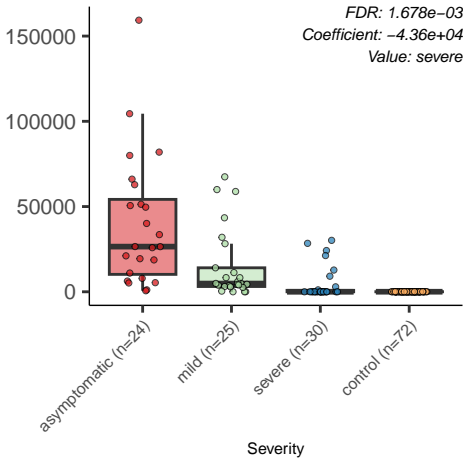

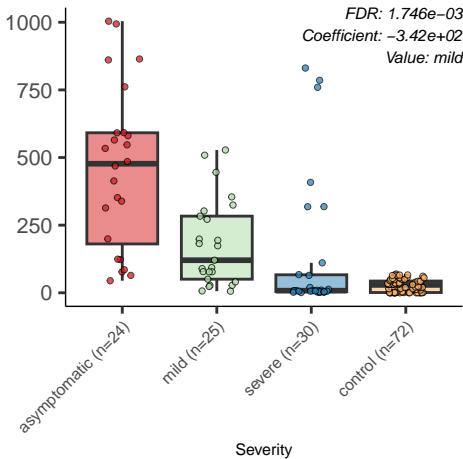

rmicutes.c\_\_Bacilli.o\_\_Lactobacillales.f\_\_Streptococcaceae.g\_\_Stre

*FDR: 1.746e-03*  
*Coefficient: -1.47e+03*  
*Value: mild*

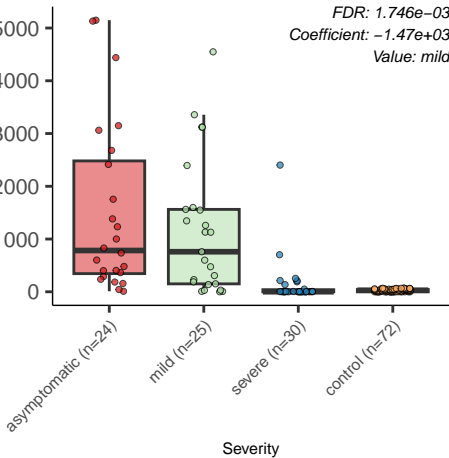



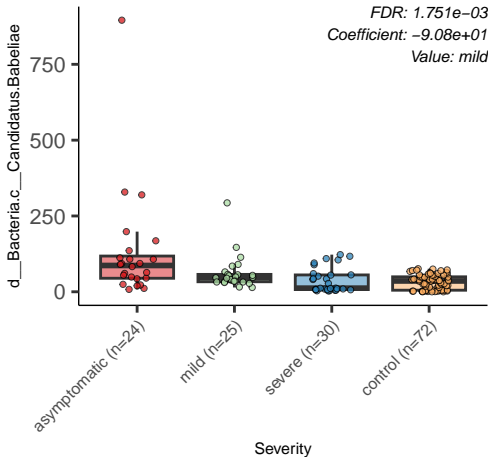

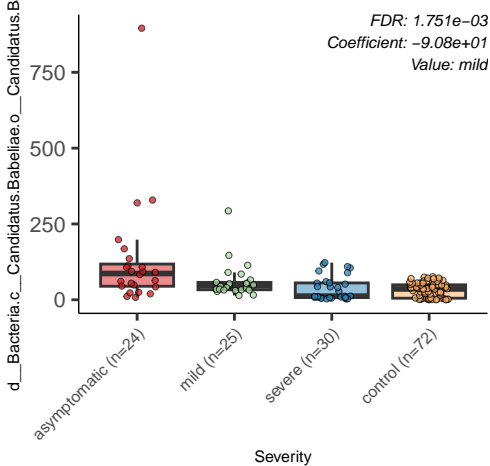

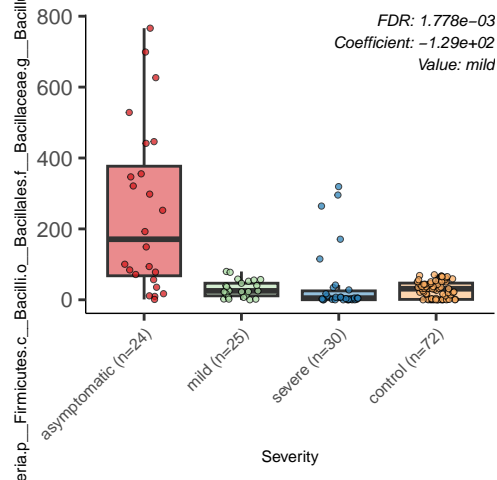

d\_Bacteria.p\_Cyanobacteria

*FDR: 1.788e-03*  
*Coefficient: -1.32e+04*  
*Value: mild*

40000

20000

0

asymptomatic (n=24)

mild (n=25)

severe (n=30)

control (n=72)

Severity

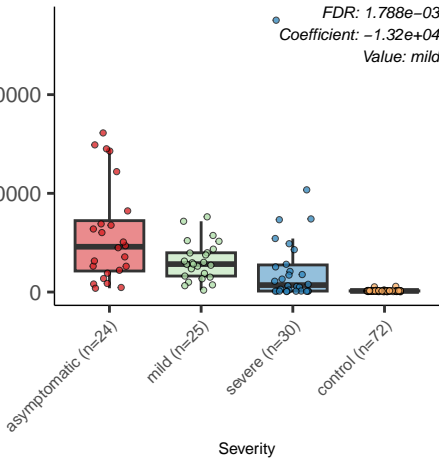

a.p.\_Firmicutes.c.\_Bacilli.o.\_Bacillales.f.\_Bacillaceae.g.\_Geobac

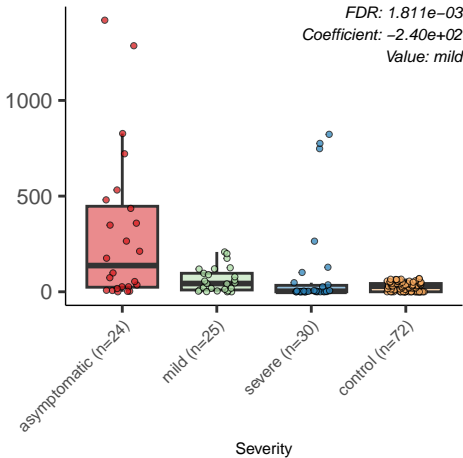

d\_Bacteria.p\_Spirochaetes.c\_Spirochaetia.o\_Spirochaetales.

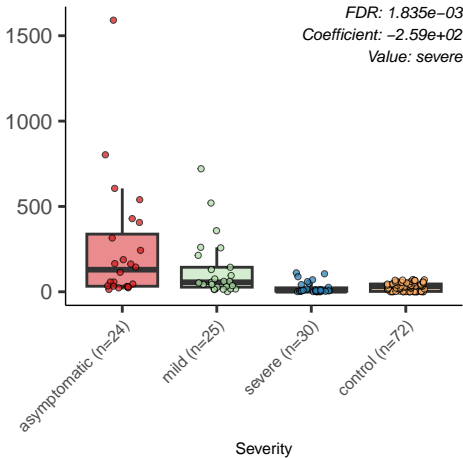

o\_\_Proteobacteria.c\_\_Gammaproteobacteria.o\_\_Alteromonadales.f.

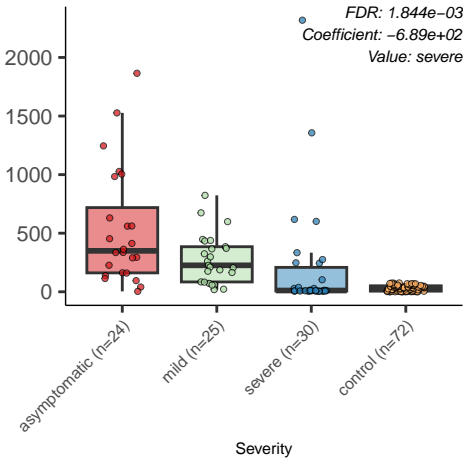

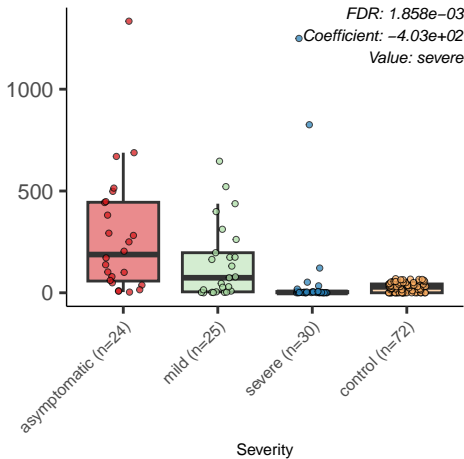



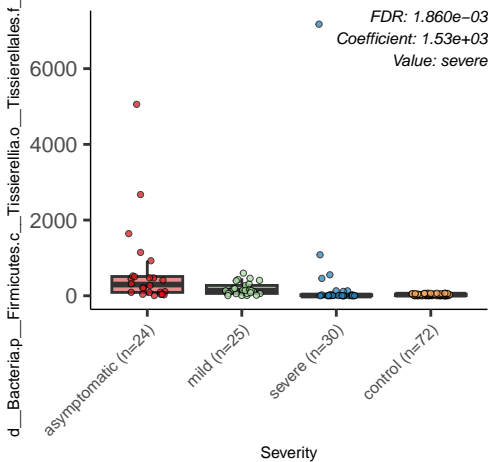

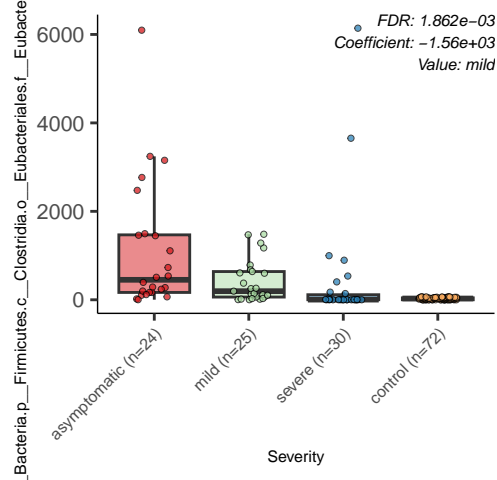

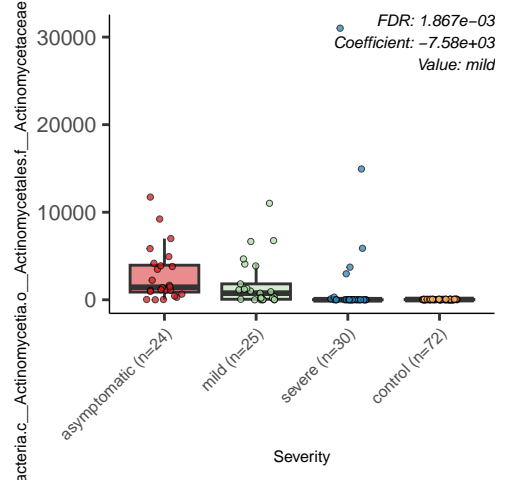

d\_Bacteria.p\_\_Proteobacteria.c\_\_Gammaproteobacteria.o\_\_

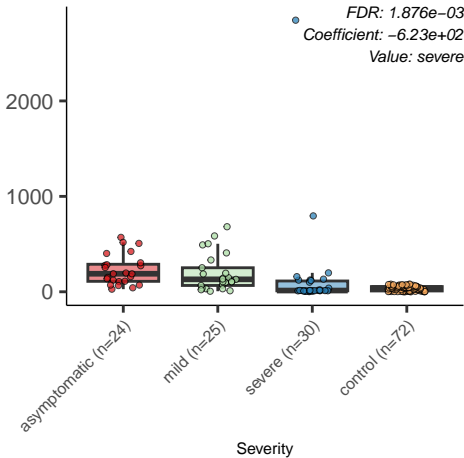

d\_Bacteria.p\_\_Cyanobacteria.o\_\_Nostocales.f\_\_Scytonemataceae

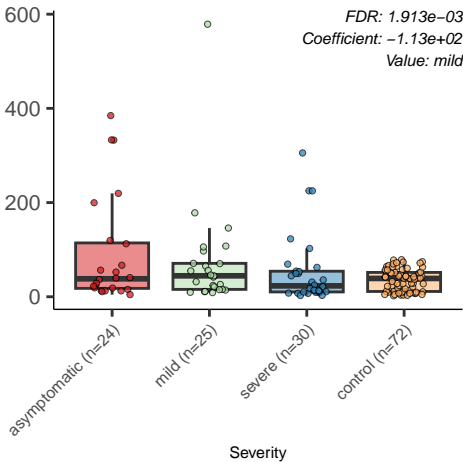

ia.p\_\_Cyanobacteria.o\_\_Nostocales.f\_\_Scytonemataceae.g\_\_Scyto

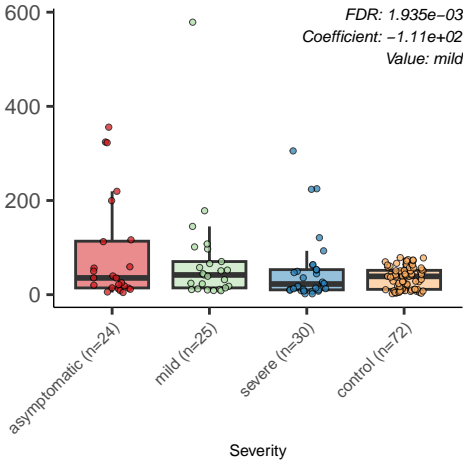

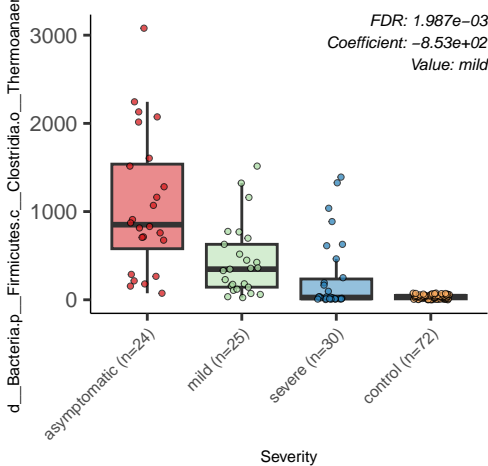

cteria.p\_\_Proteobacteria.c\_\_Gammaproteobacteria.o\_\_Chromatiales

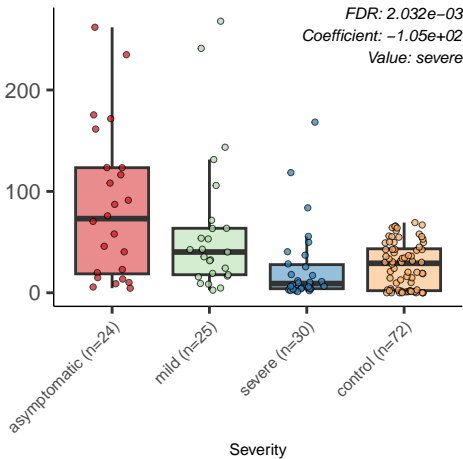



Bacteroidetes.c\_Bacteroidia.o\_Bacteroidales.f\_Rikenellaceae.

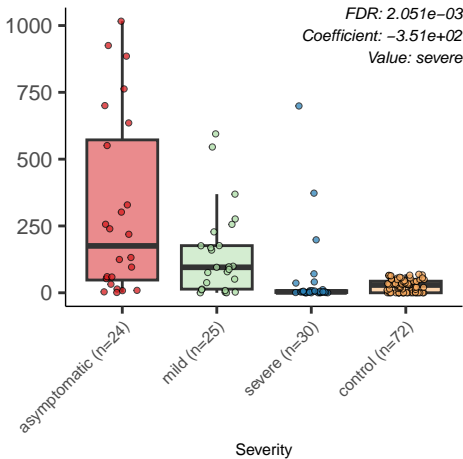

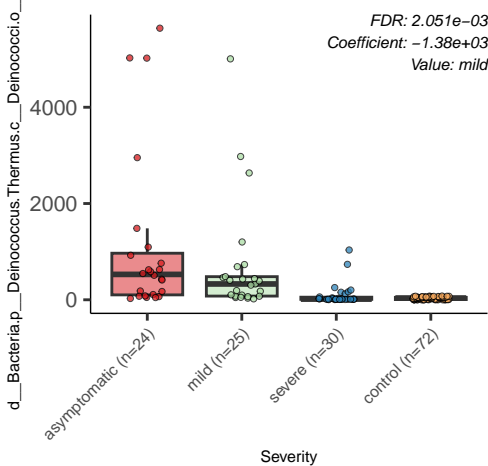

d\_Bacteria.p\_Deinococcus.Thermus.c\_Deinococci.o\_Therma

FDR:  $2.051e-03$   
Coefficient:  $-1.38e+03$   
Value: mild

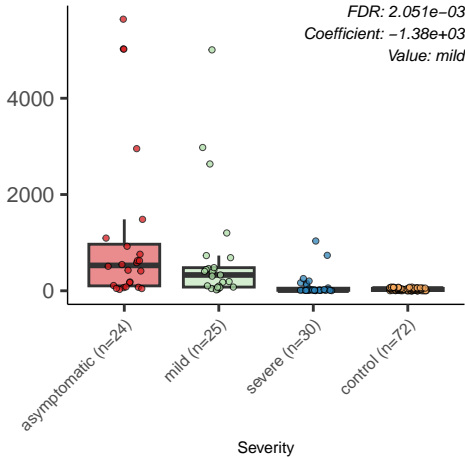

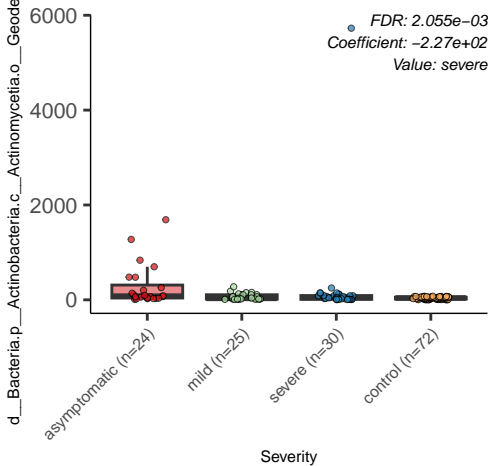

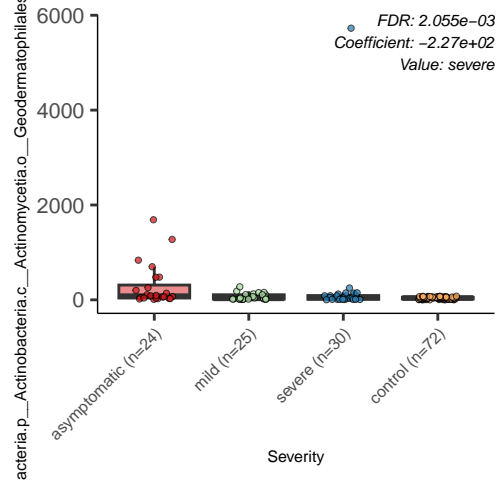

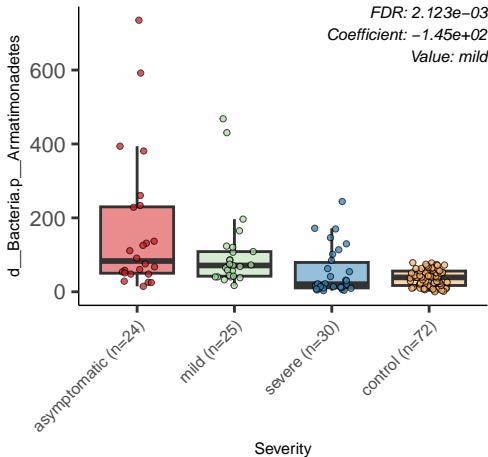

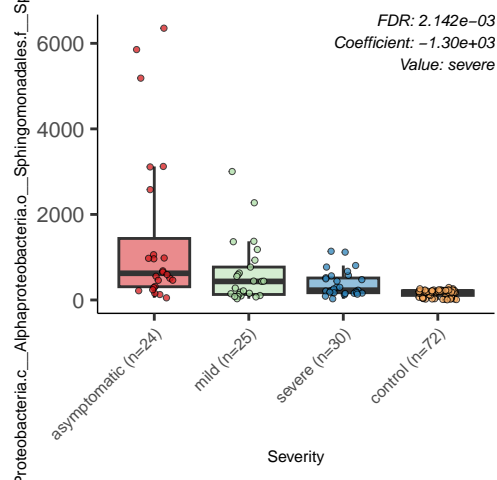

d\_Bacteria.p\_Bacteroidetes.c\_Cytophagia.o\_Cytophagales.f

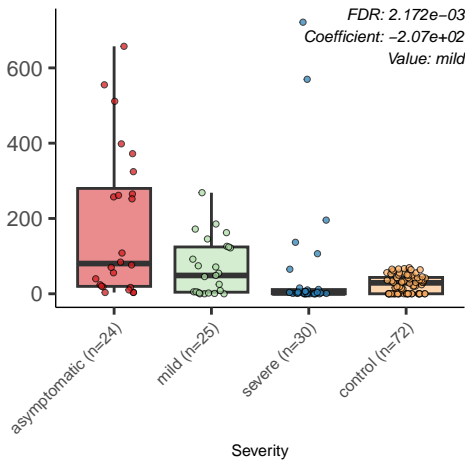



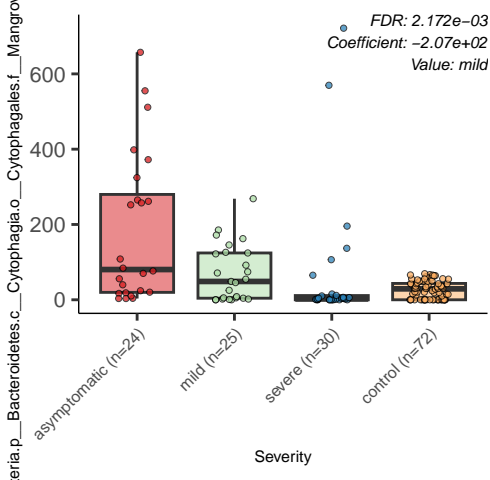

eroidetes.c\_\_Cytophagia.o\_\_Cytophagales.f\_\_Mangrovivirgaceae.g

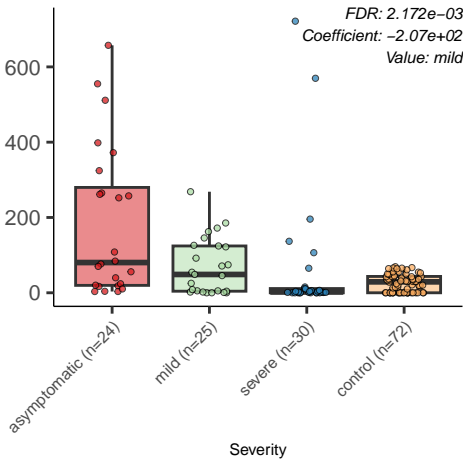

micutes.c\_\_Bacilli.o\_\_Lactobacillales.f\_\_Streptococcaceae.g\_\_Streptococcus

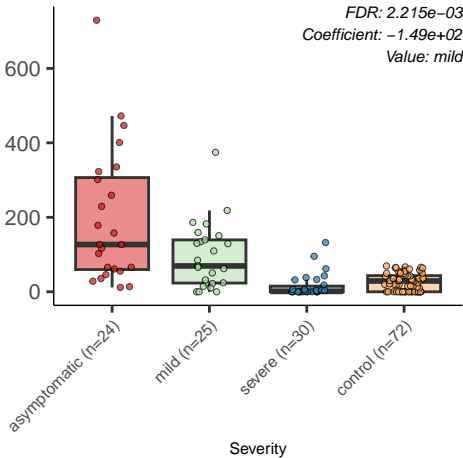

d\_Bacteria.p\_Firmicutes.c\_Clostridia.o\_Thermoanae

FDR: 2.215e-03  
Coefficient: -8.77e+02  
Value: severe

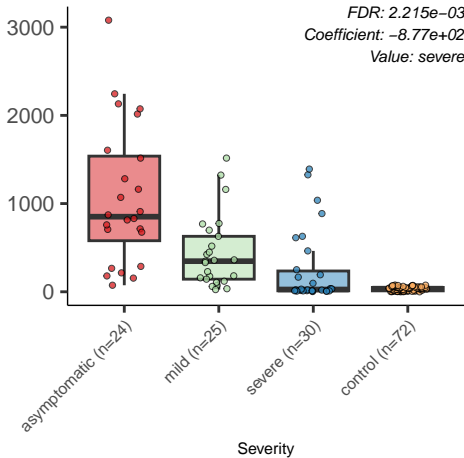

a.p\_\_Proteobacteria.c\_\_Betaproteobacteria.o\_\_Burkholderiales.f\_\_C

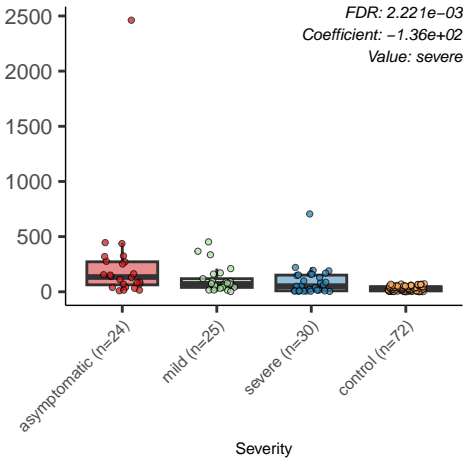

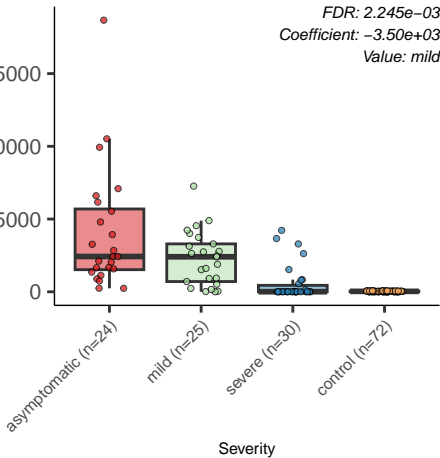

obacteria.c\_Actinomycetia.o\_Actinomycetales.f\_Actinomycetace

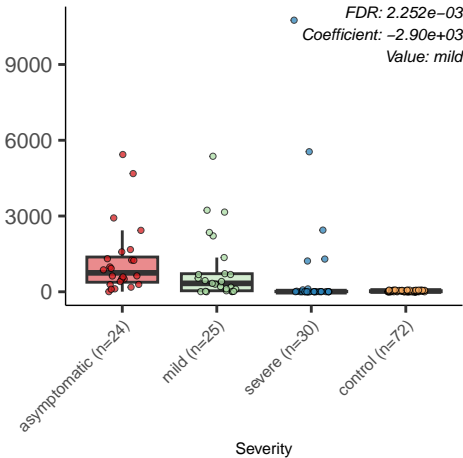

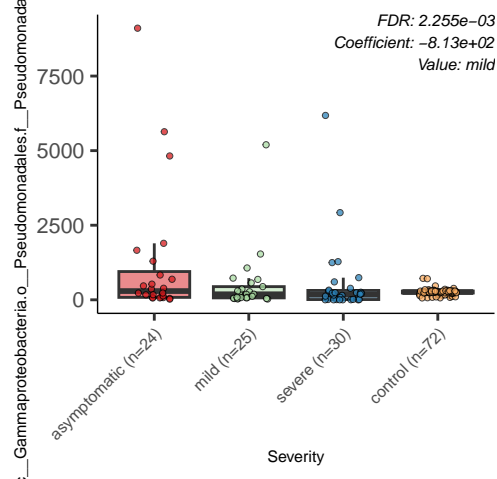



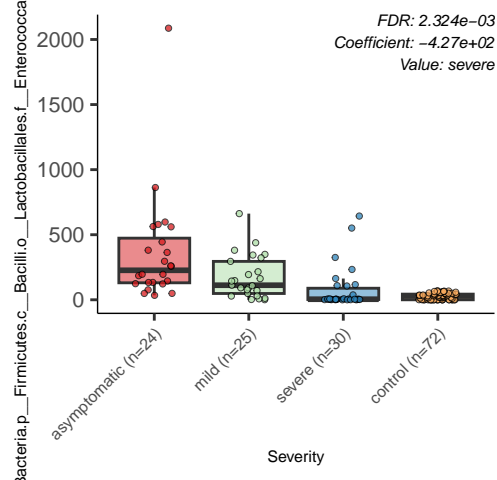

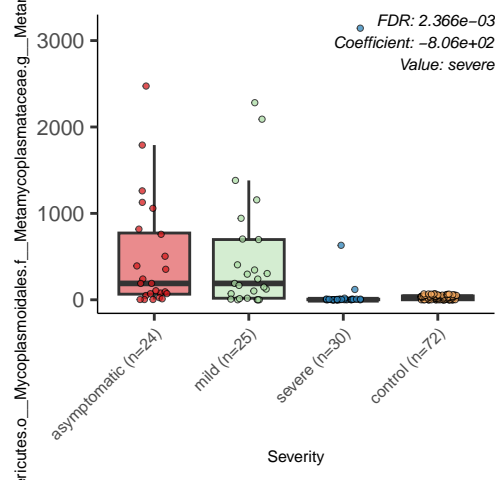

ps.c\_\_Clostridia.o\_\_Eubacteriales.f\_\_Eubacteriales.Family.XIII..Ince

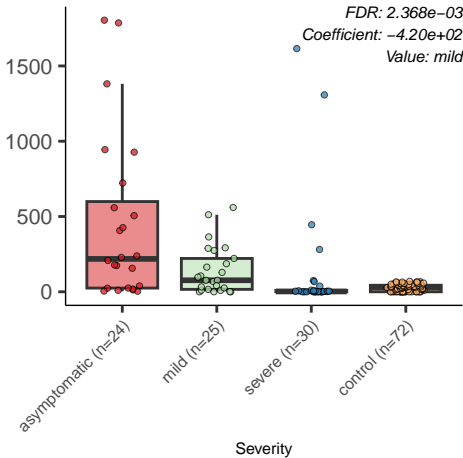

rimonadia.o\_\_Candidatus.Nanosynbacterales.f\_\_Candidatus.Nanos

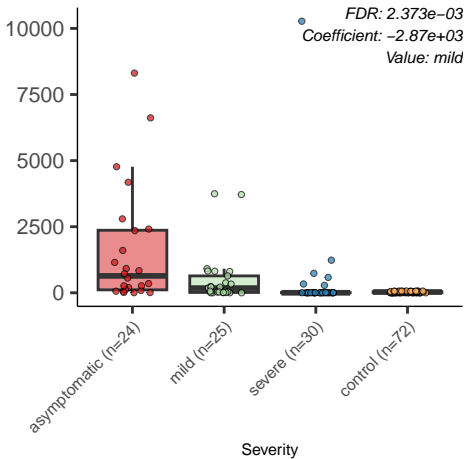

d\_\_Bacteria.p\_\_Bacteroidetes.c\_\_Sphingobacter

10000

5000

0

asymptomatic (n=24)

mild (n=25)

severe (n=30)

control (n=72)

Severity

FDR: 2.382e-03

Coefficient: -3.18e+03

Value: mild

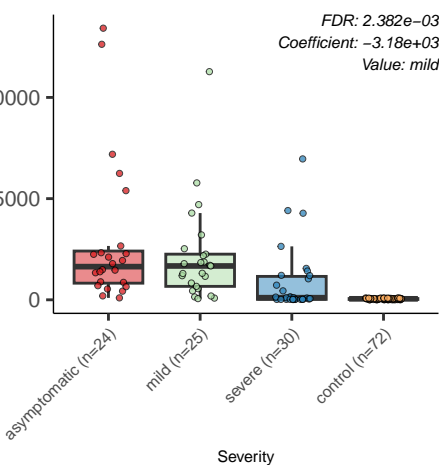

d\_Bacteria.p\_Bacteroidetes.c\_Sphingobacteriia.o\_Sphir

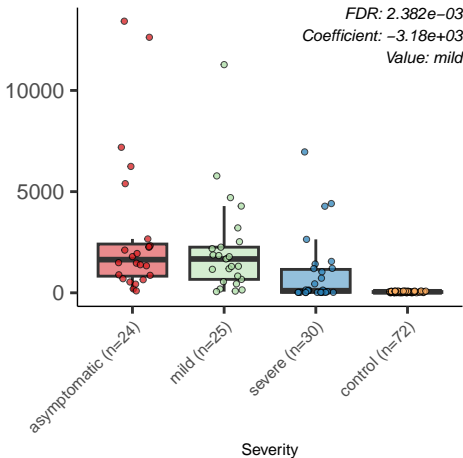

bacteria.p\_\_Bacteroidetes.c\_\_Spingobacteriia.o\_\_Spingobacteriale

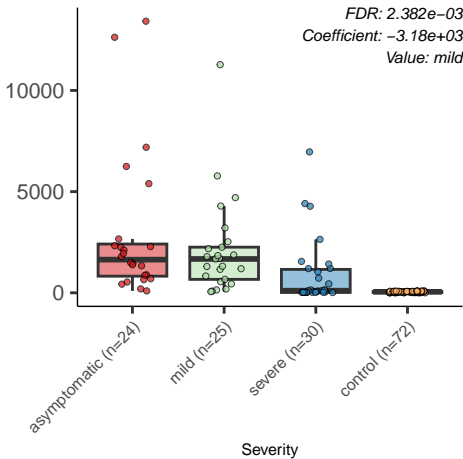

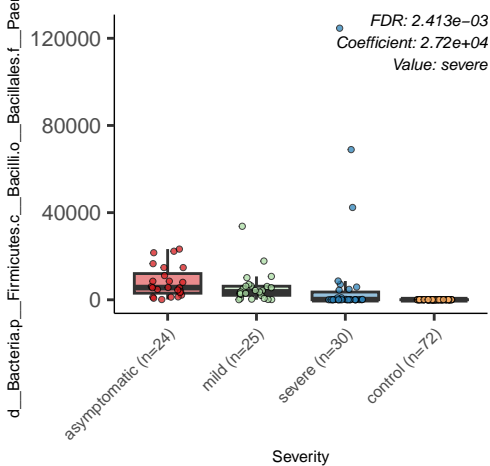



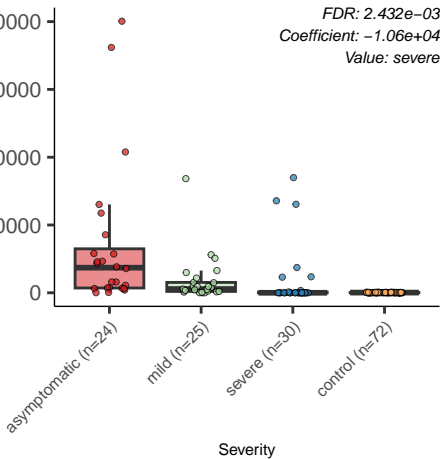

Gammaproteobacteria.o\_\_Pseudomonadales.f\_\_Pseudomonadace

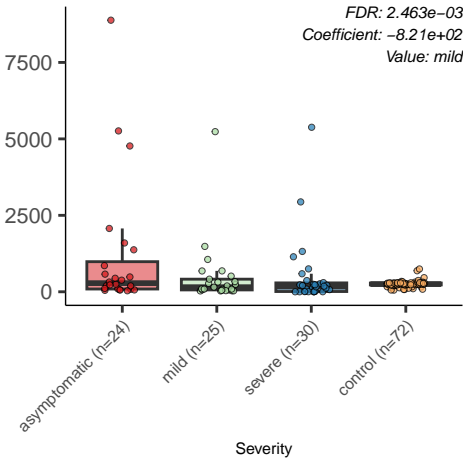

enericutes.c\_\_Mollicutes.o\_\_Mycoplasmales.f\_\_Mycoplasma

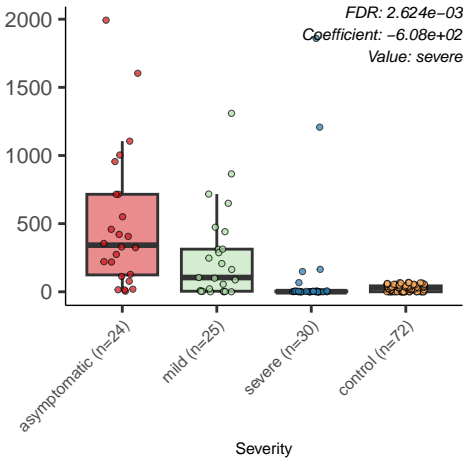

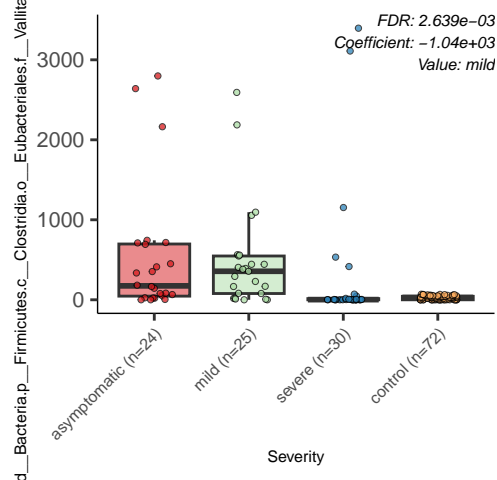

firmicutes.c\_\_Bacilli.o\_\_Lactobacillales.f\_\_Streptococcaceae.g\_\_Str

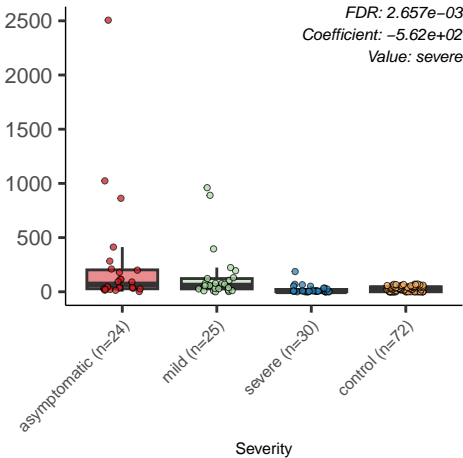

terial.p\_\_Tenericutes.c\_\_Mollicutes.o\_\_Mycoplasmatales.f\_\_Mycoplasma

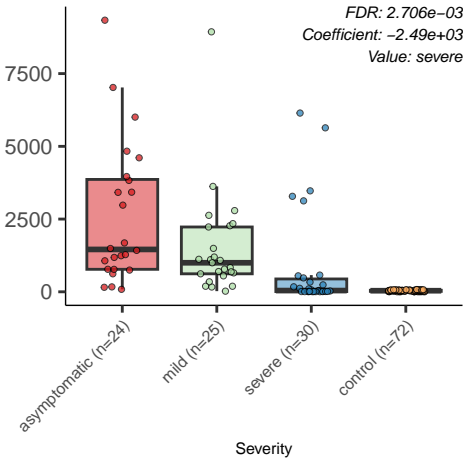

4\_Bacteria.p\_Actinobacteria.c\_Actinomycetia.o\_Micrococcales

FDR:  $2.717e-03$   
Coefficient:  $-3.98e+02$   
Value: mild

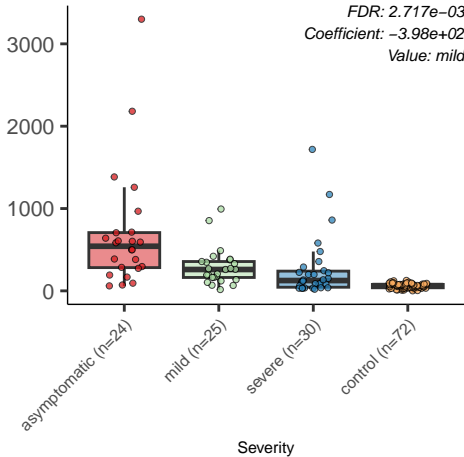

Firmicutes.c\_\_Clostridia.o\_\_Eubacteriales.f\_\_Clostridiaceae.g\_\_Clo

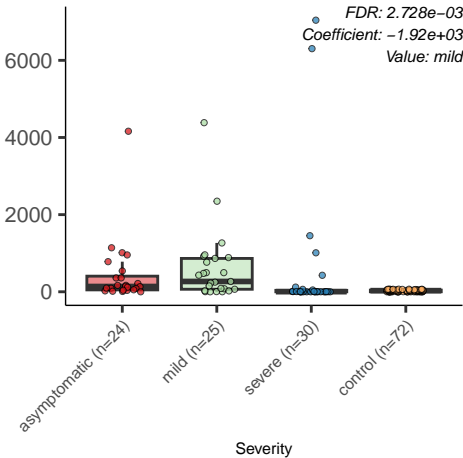



d\_Bacteria.p\_Acidobacteria

FDR:  $2.743\text{e-}03$   
Coefficient:  $-1.48\text{e}+03$   
Value: severe

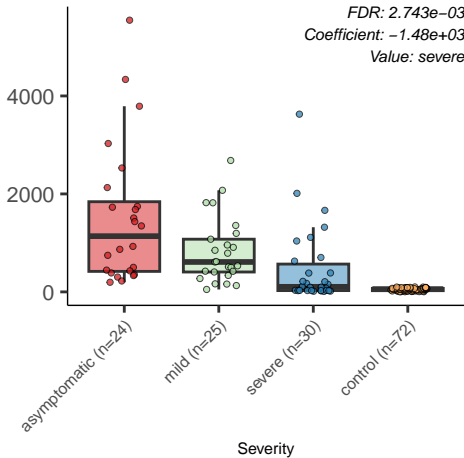

bacteria.p\_\_Proteobacteria.c\_\_Deltaproteobacteria.o\_\_Desulfuromon

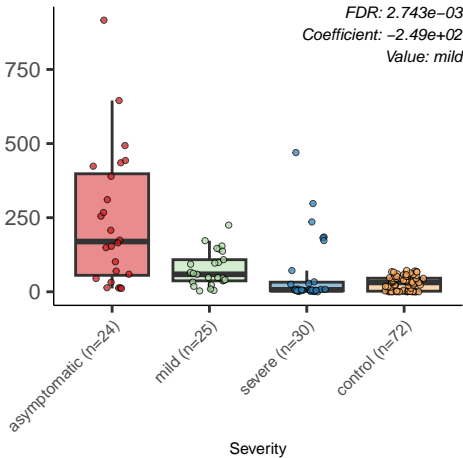

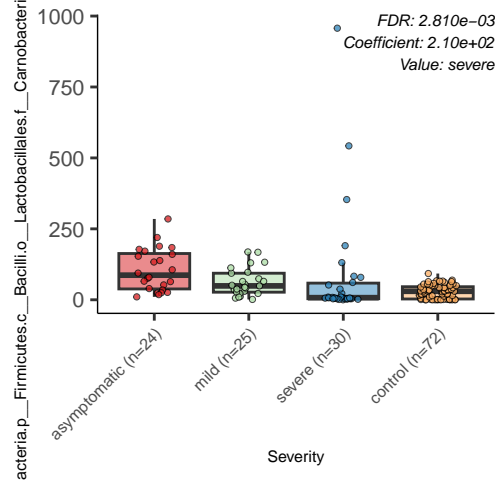

\_\_Gammaproteobacteria.o\_\_Pseudomonadales.f\_\_Pseudomonada

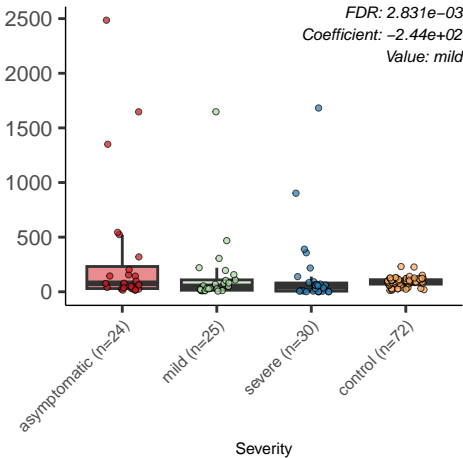

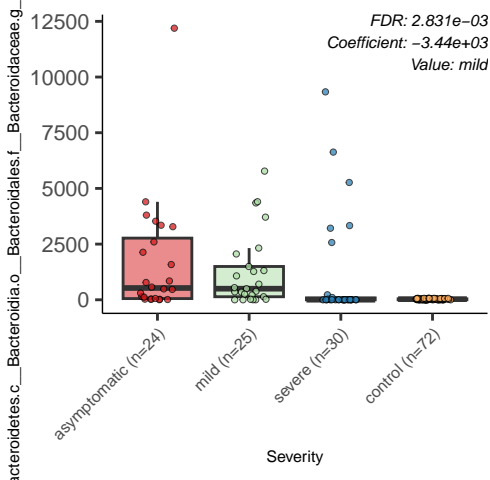

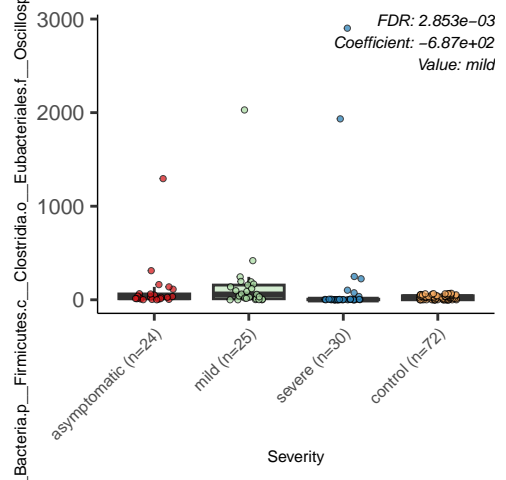

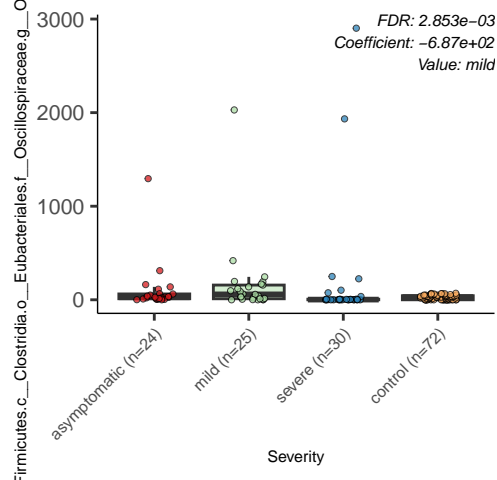

d\_Bacteria.p\_Actinobacteria.c\_Actinomycetia.o\_Candidatus

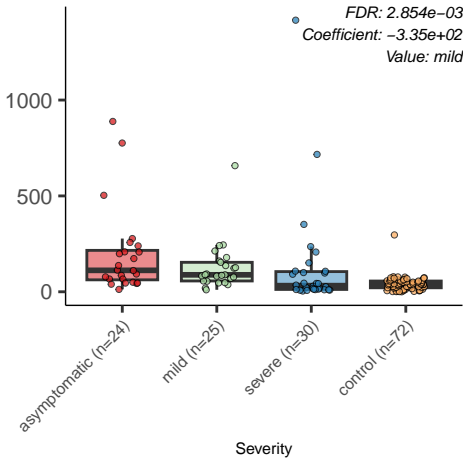



Actinobacteria.c\_\_Actinomycetia.o\_\_Candidatus.Nanopelagale

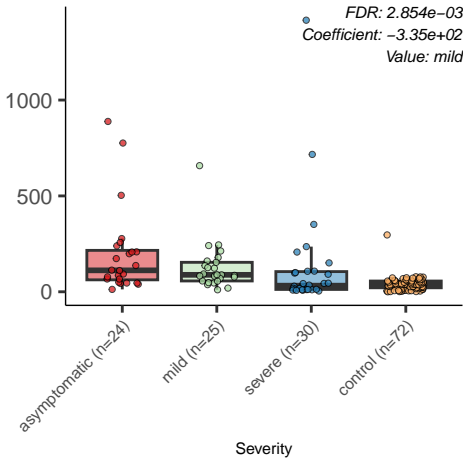

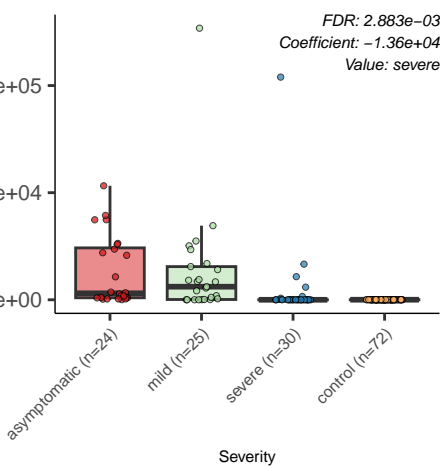

eria.c\_Actinomyces.f\_Candidatus.Nanopelagales.f\_Candidatu

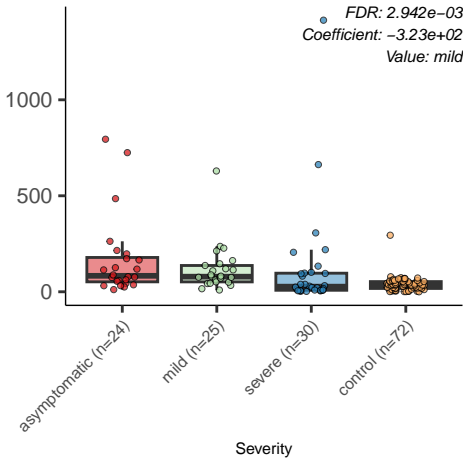

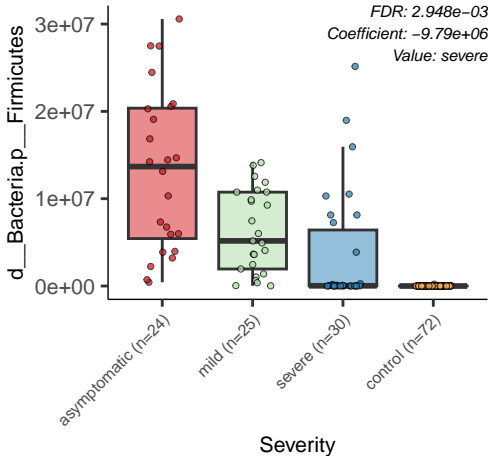

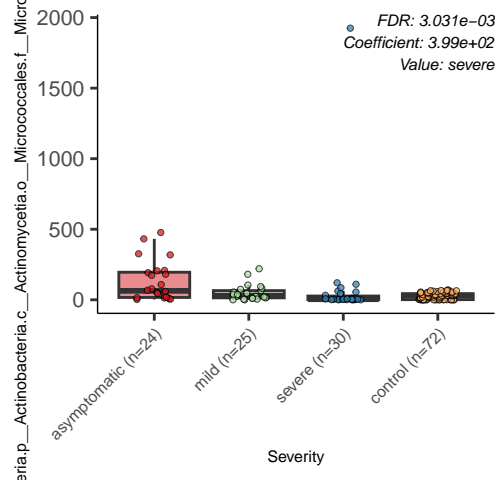

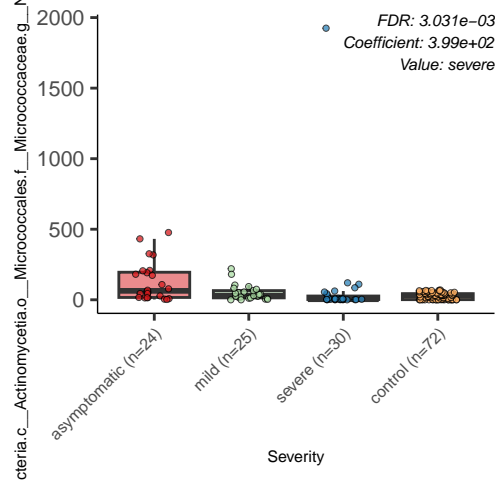

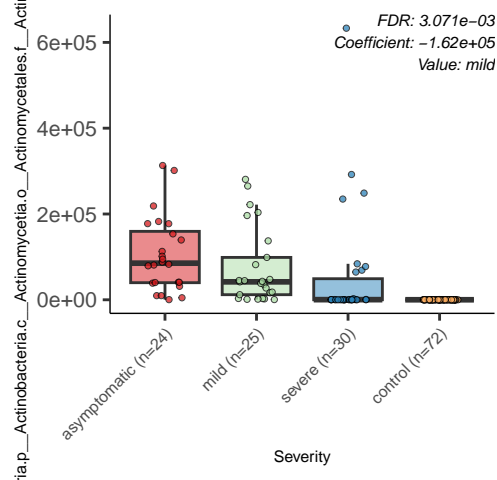

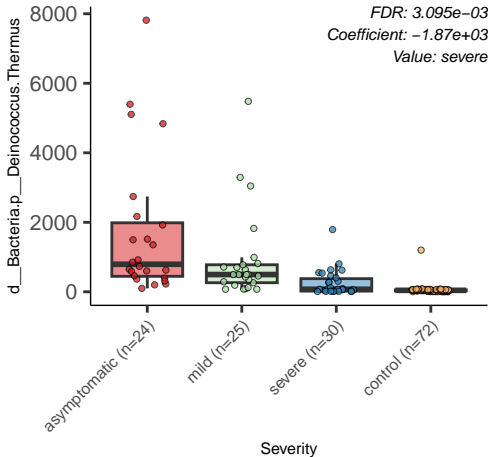



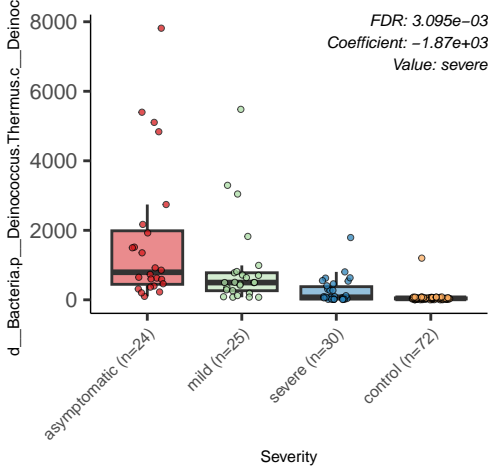

ia.p\_\_Proteobacteria.c\_\_Alphaproteobacteria.o\_\_Hyphomicrobiales

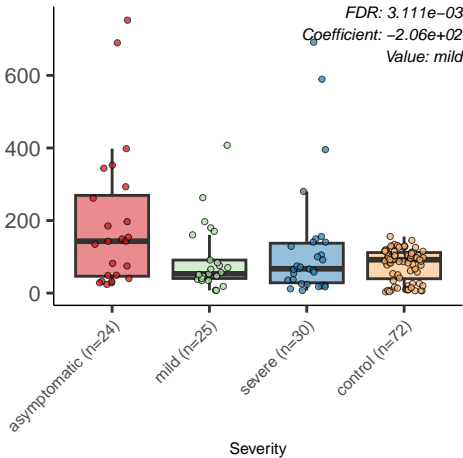

bacteria.p\_Firmicutes.c\_Bacilli.o\_Bacillales.f\_Thermoactinomyces

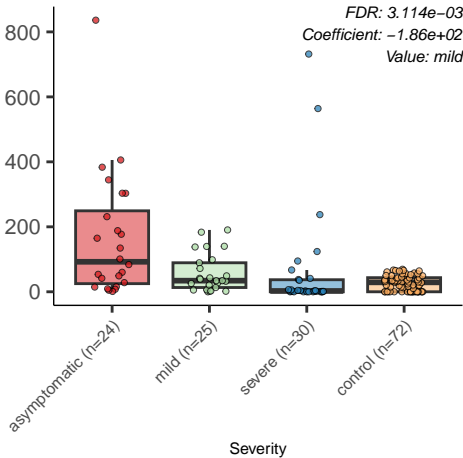

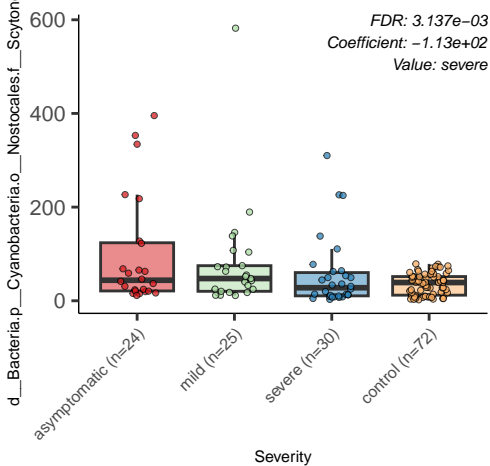

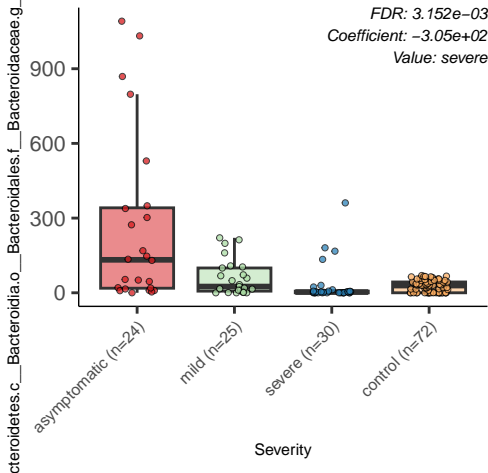

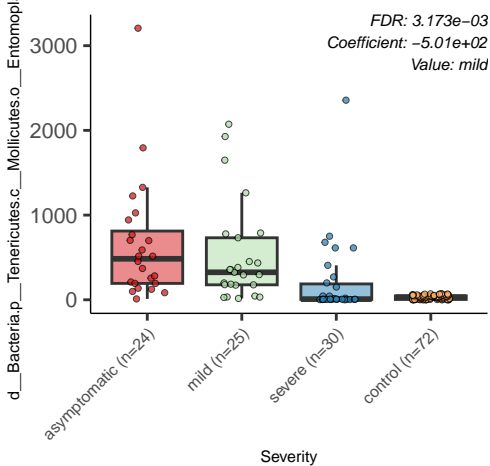

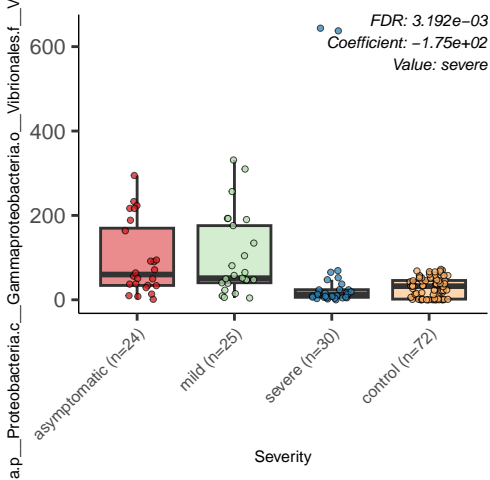

bacteria.c\_Actinomycetia.o\_Actinomycetales.f\_Actinomycetaceae

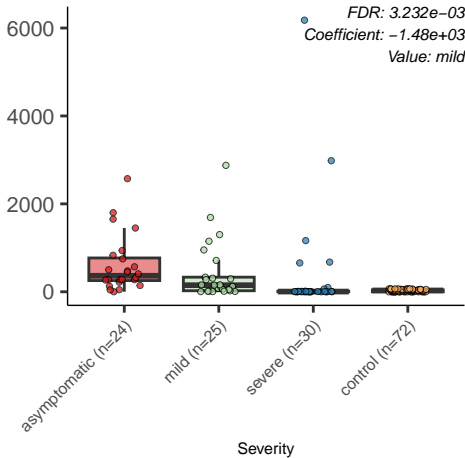



acteria.c\_\_Betaproteobacteria.o\_\_Burkholderiales.f\_\_Burkholderia

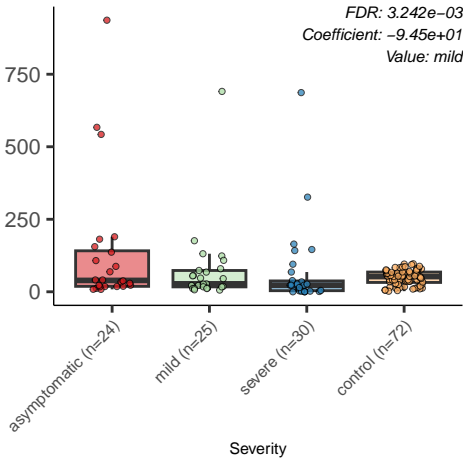

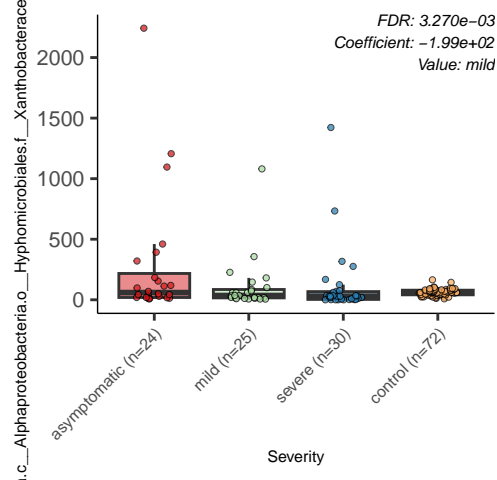

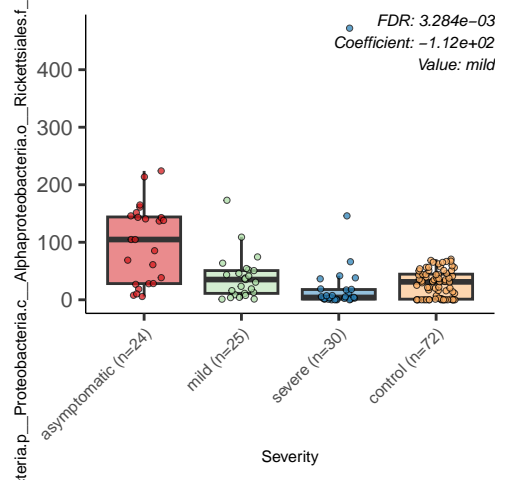

accharimonadia.o\_\_Candidatus.Nanosynbacterales.f\_\_Candidatus.

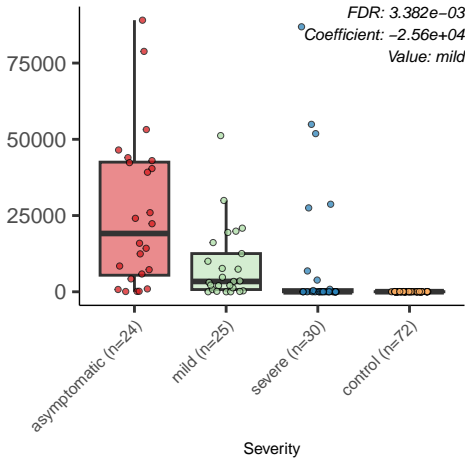

ia.p\_\_Proteobacteria.c\_\_Betaproteobacteria.o\_\_Burkholderiales.f

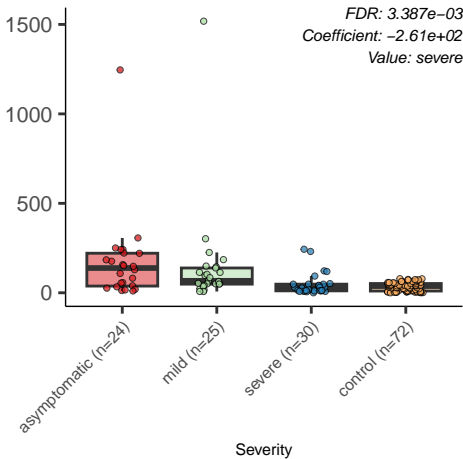

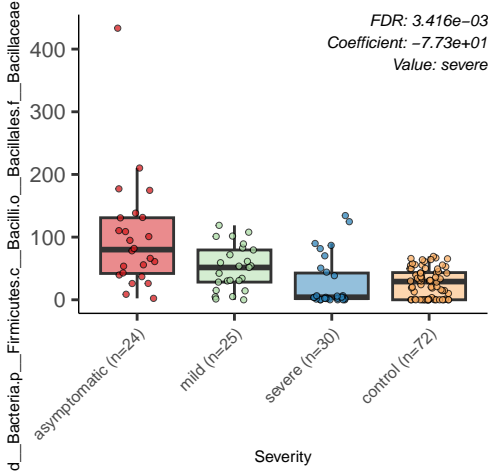

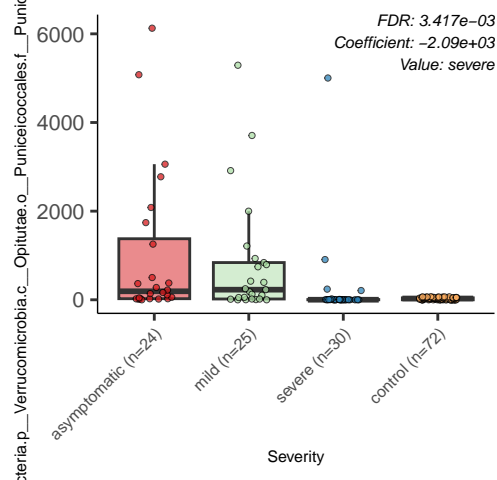

tucomicrobia.c\_\_Opitutae.o\_\_Puniceicoccales.f\_\_Puniceicoccaceae

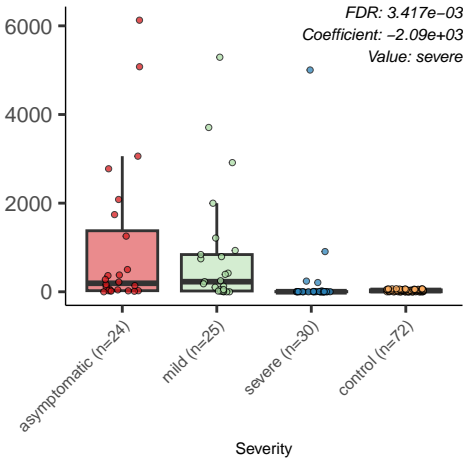



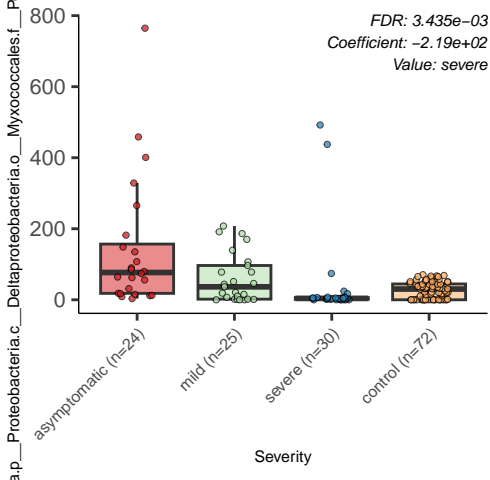

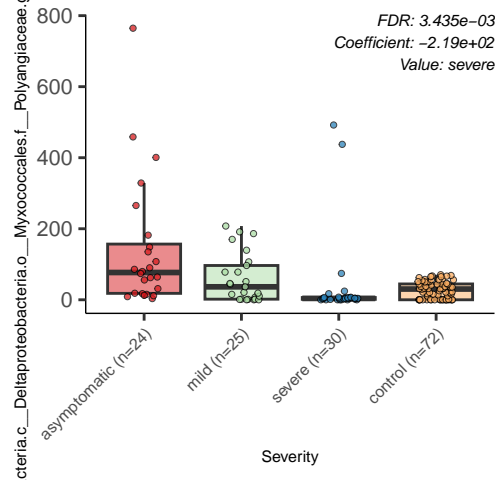

irochaetes.c\_\_Spirochaetia.o\_\_Spirochaetales.f\_\_Treponemataceae

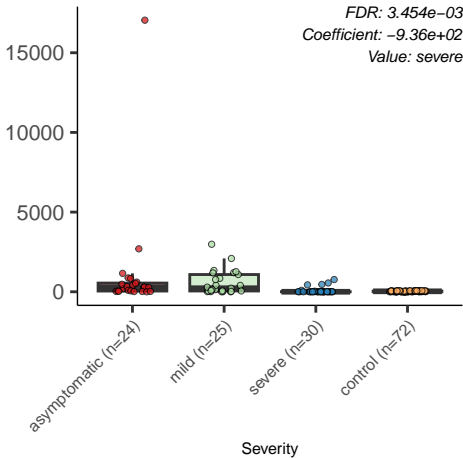

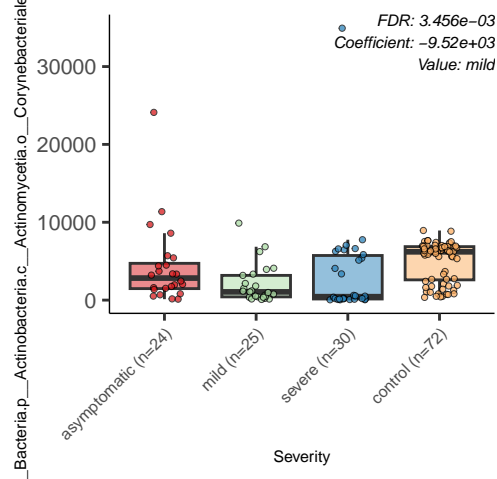

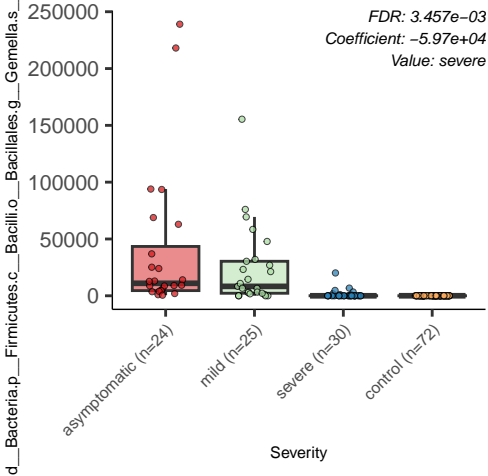

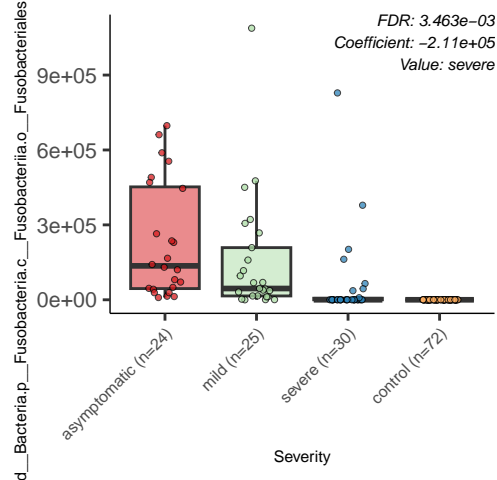

d\_Bacteria.p\_Proteobacteria

2.0e+07  
1.5e+07  
1.0e+07  
5.0e+06  
0.0e+00

FDR: 3.463e-03  
Coefficient: -5.67e+06  
Value: severe

asymptomatic (n=24)

mild (n=25)

severe (n=30)

control (n=72)

Severity

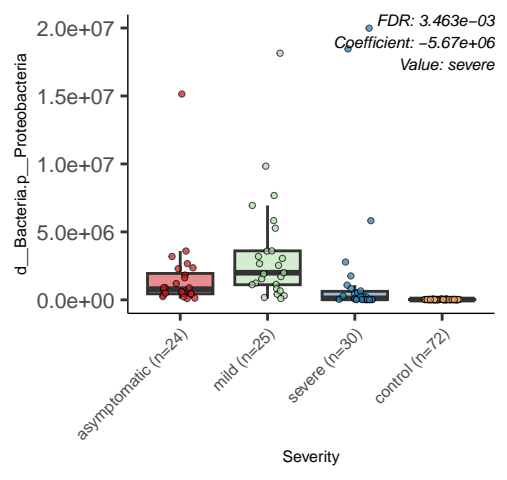

Bacteria.p\_Firmicutes.c\_Bacilli.o\_Lactobacillales.f\_Lactobacilla

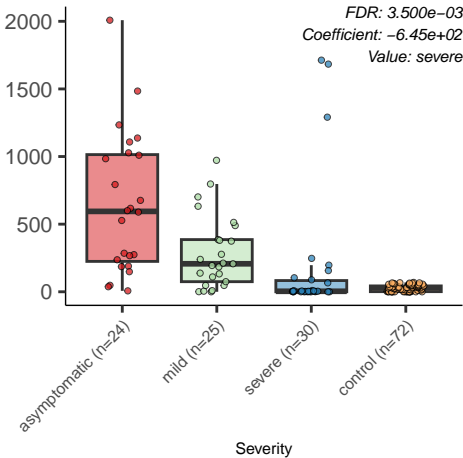



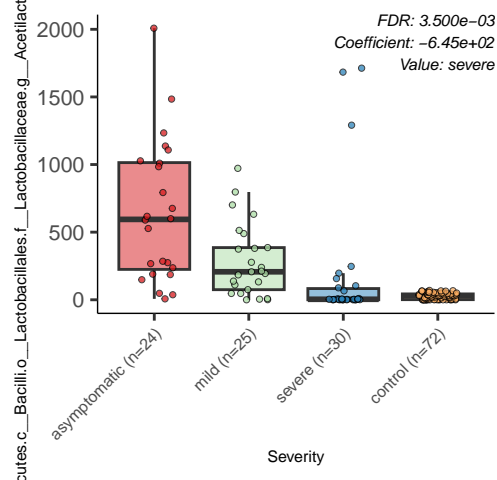

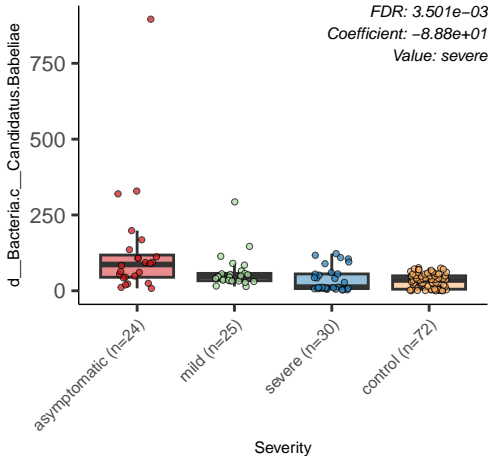

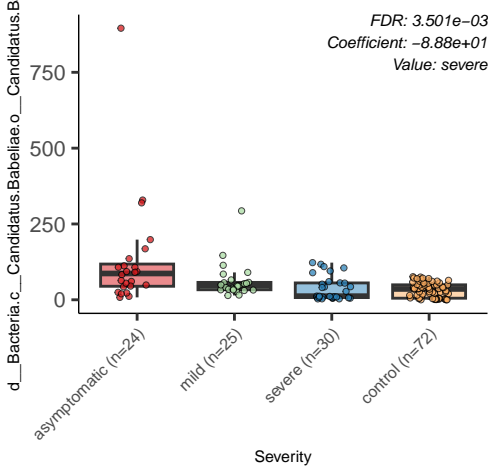

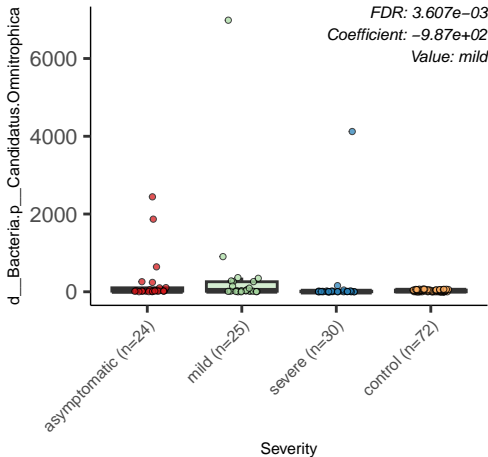

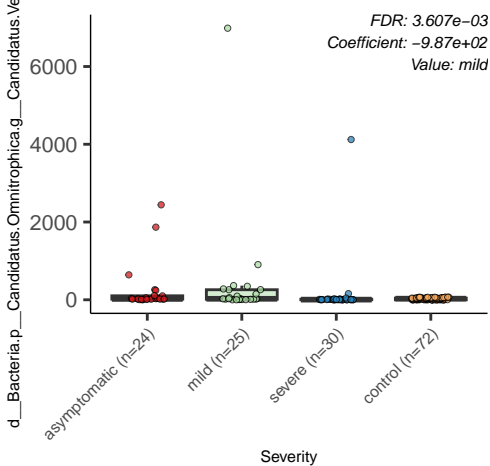

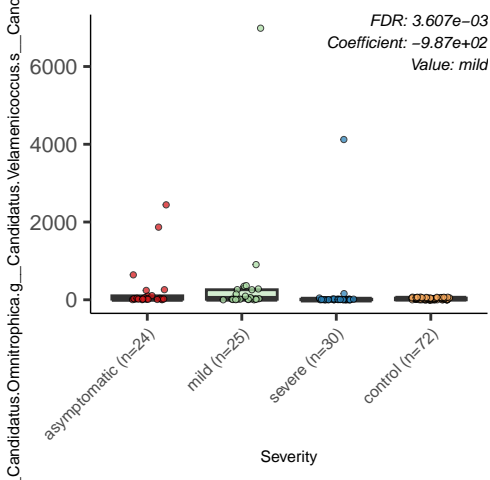

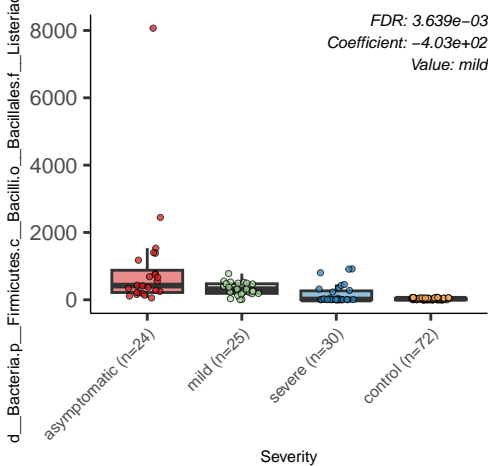

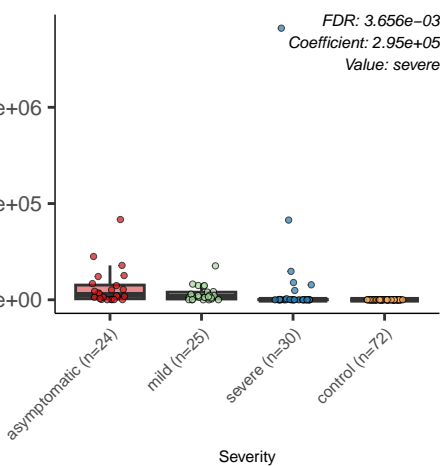



d\_Bacteria.p\_Proteobacteria.c\_Deltaproteobacteria.o\_De

10000

5000

0

asymptomatic (n=24)

mild (n=25)

severe (n=30)

control (n=72)

Severity

FDR:  $3.741e-03$

Coefficient:  $-2.11e+03$

Value: severe

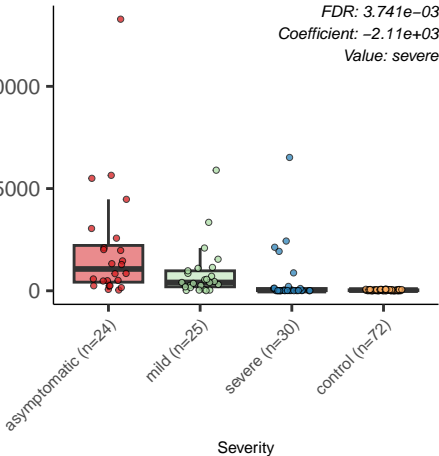

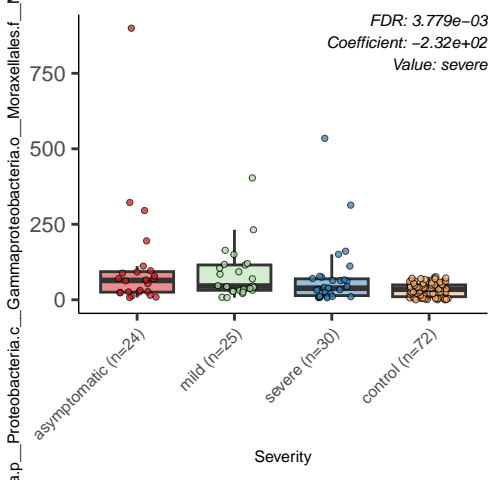

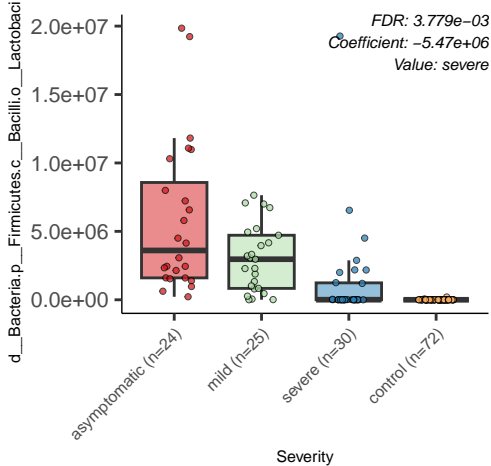

d\_Bacteria.p\_\_Tenericutes.c\_\_Mollicutes.o\_\_Acholepleia

FDR:  $3.794e-03$   
Coefficient:  $-5.78e+02$   
Value: severe

6000

4000

2000

0

asymptomatic (n=24)

mild (n=25)

severe (n=30)

control (n=72)

Severity

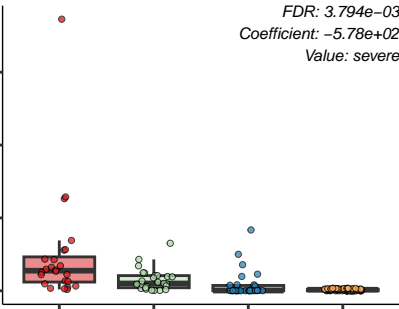

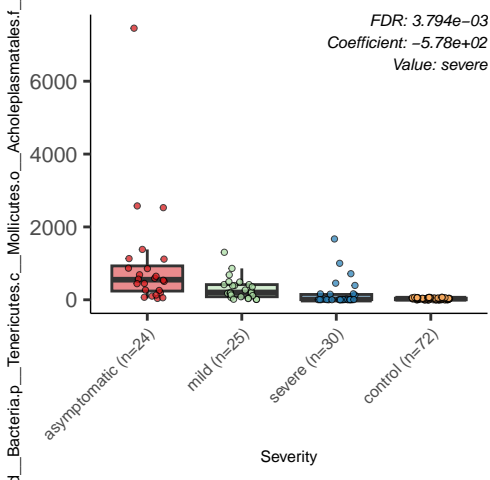

d\_\_Bacteria.p\_\_Proteobacteria.c\_\_Deltaproteobac

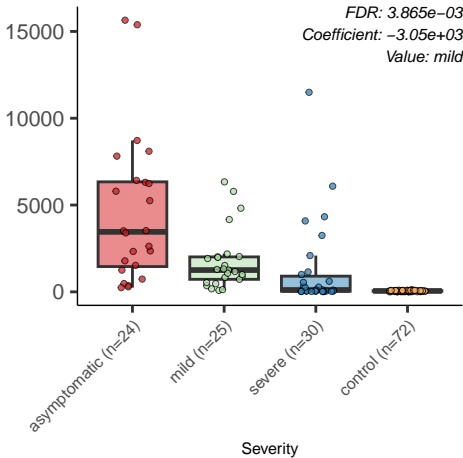

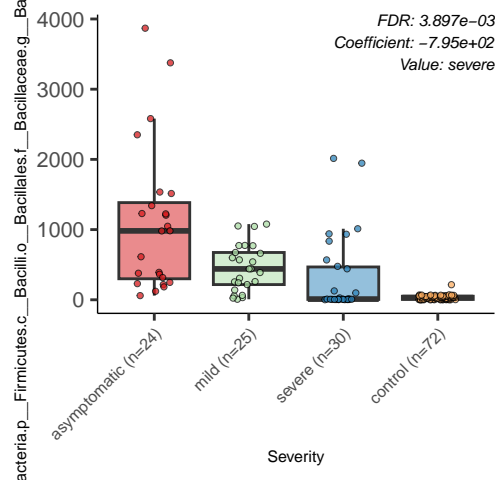

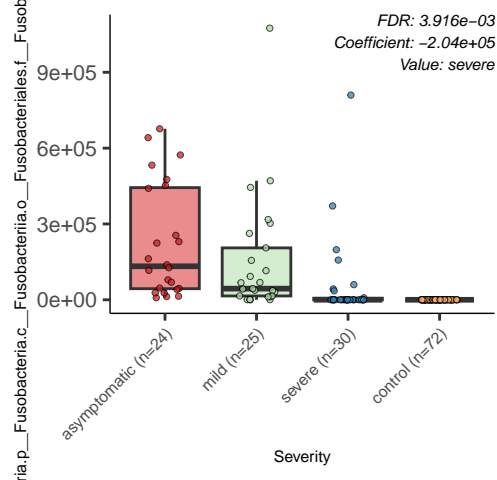



micutes.c\_Bacilli.o\_Lactobacillales.f\_Streptococcaceae.g\_Stre

*FDR: 3.977e-03*  
*Coefficient: -9.31e+02*  
*Value: severe*

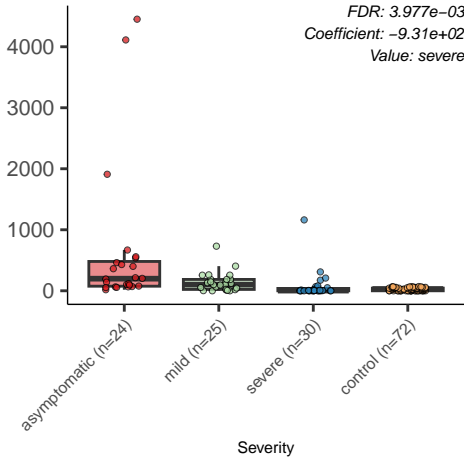

micutes.c\_\_Bacilli.o\_\_Lactobacillales.f\_\_Streptococcaceae.g\_\_Stre

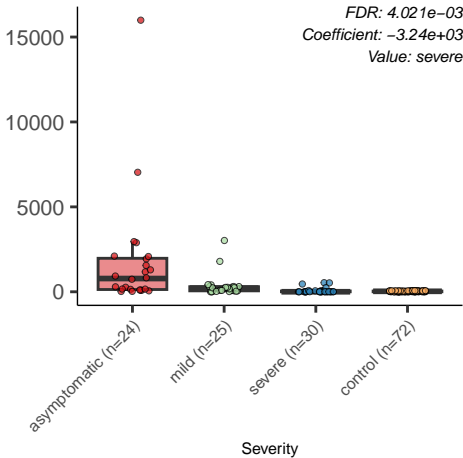

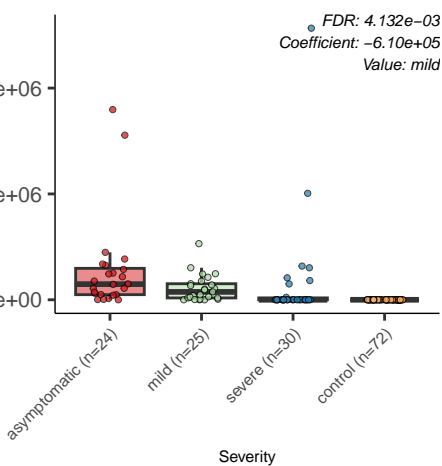

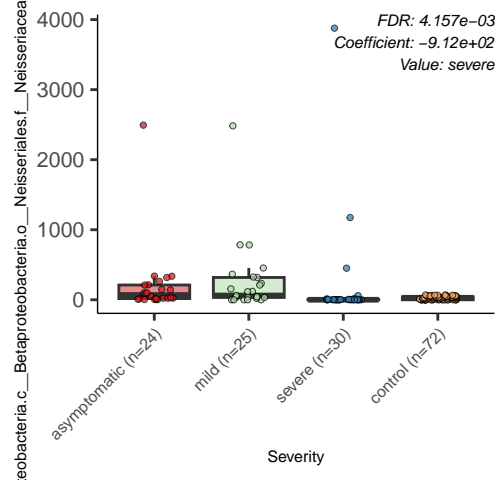

Proteobacteria.c\_\_Alphaproteobacteria.o\_\_Hyphomicrobiales.f\_\_X

FDR: 4.281e-03  
Coefficient: -4.29e+02  
Value: mild

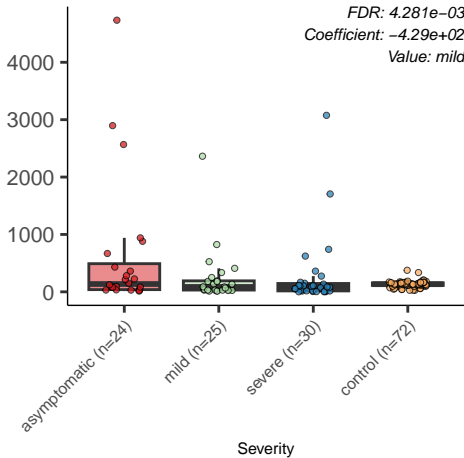

Bacteria.p\_Firmicutes.c\_Bacilli.o\_Bacillales.f\_Bacillaceae.g\_B

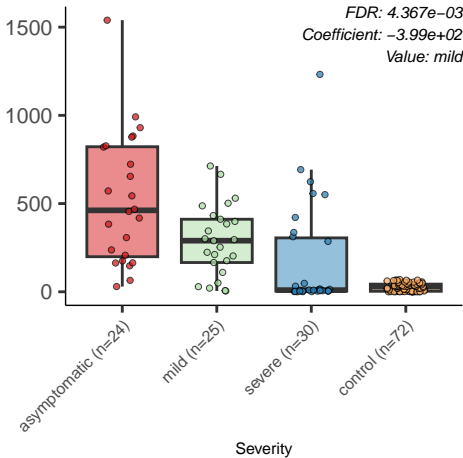

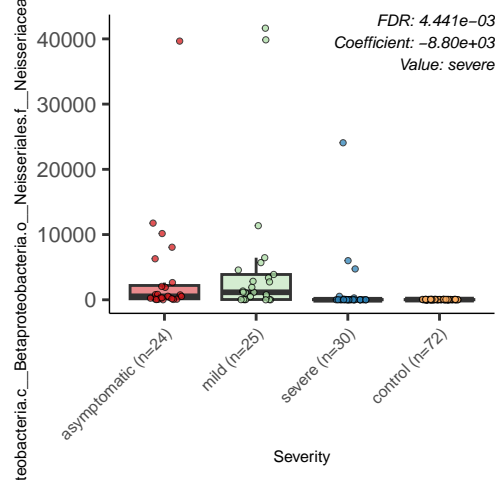

utes.c\_\_Negativicutes.o\_\_Selenomonadales.f\_\_Selenomonadaceae

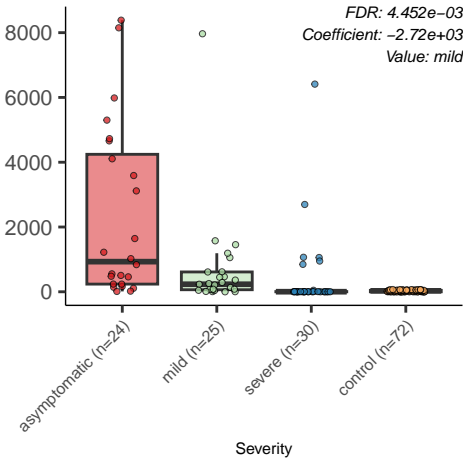



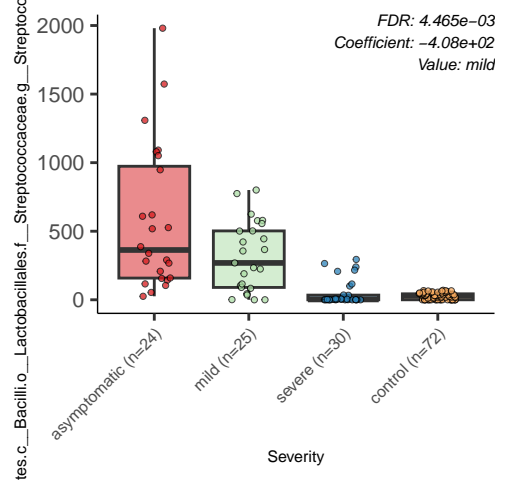

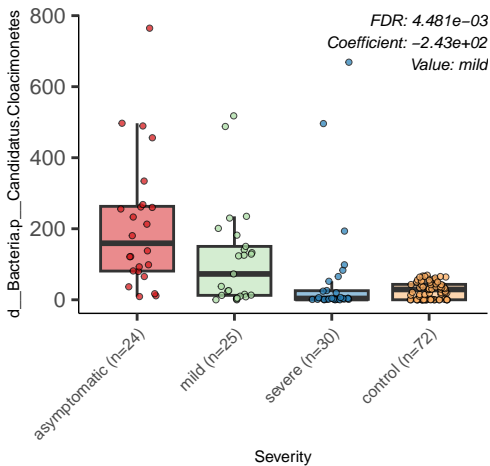

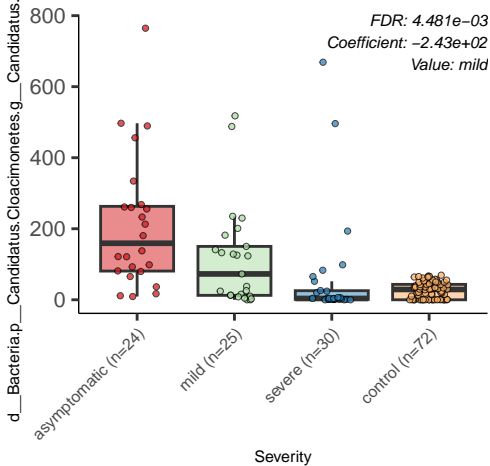

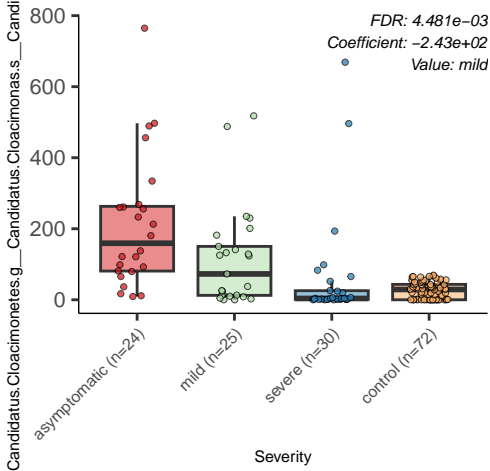

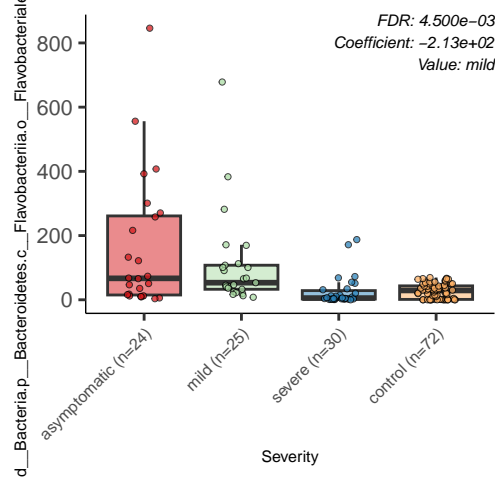

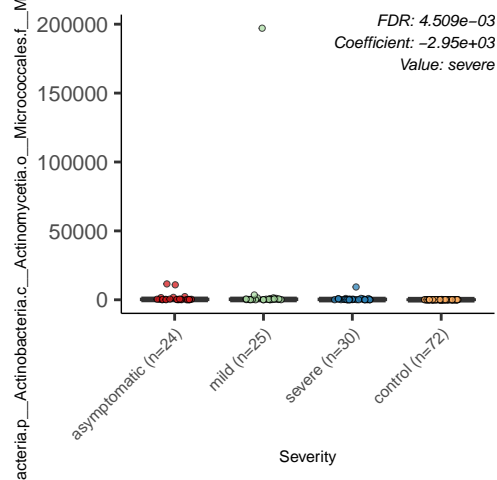

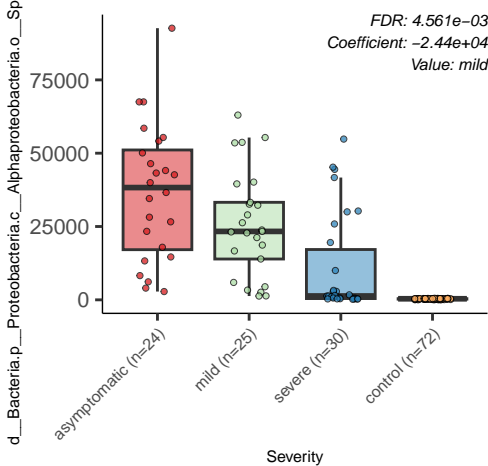

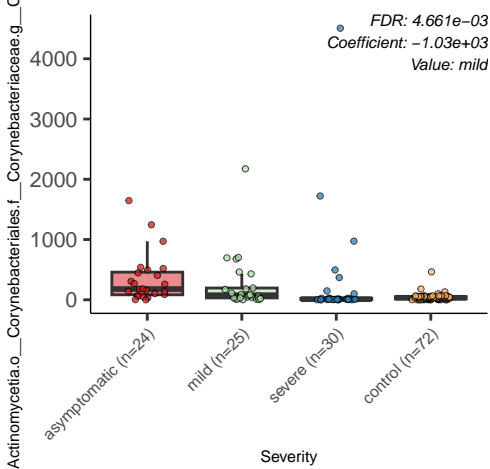



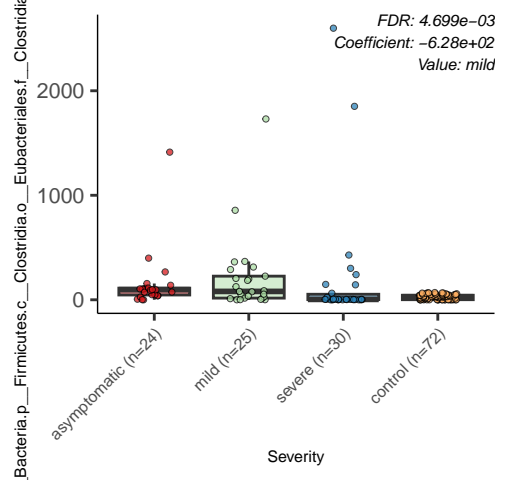

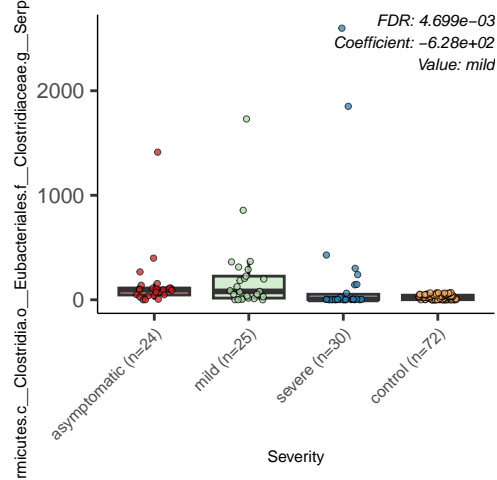

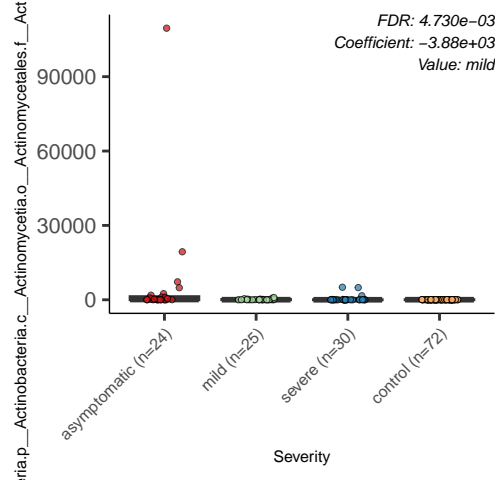

control (n=72)

FDR: 4.730e-03  
Coefficient: -3.88e+03  
Value: mild

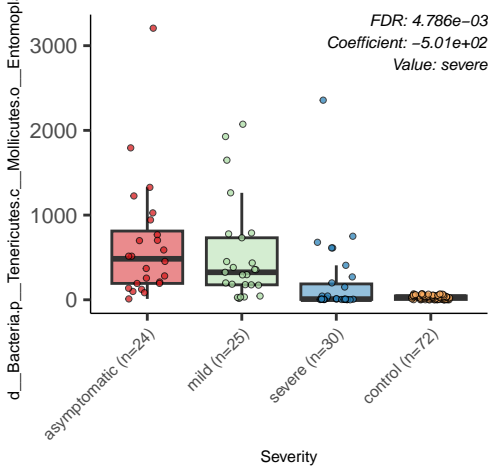

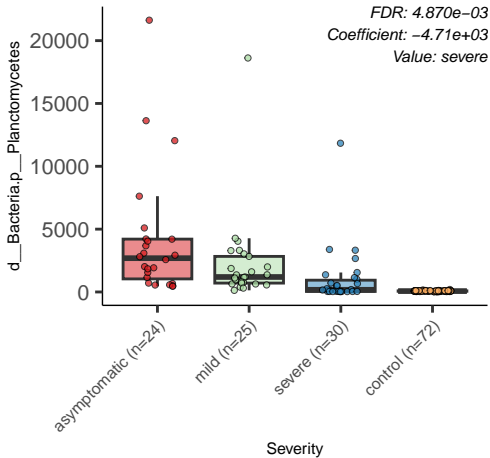

Firmicutes.c\_Clostridia.o\_Eubacteriales.f\_Clostridiaceae.g\_C

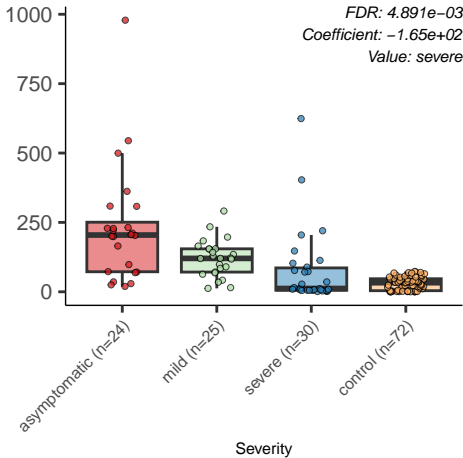

p\_\_Proteobacteria.c\_\_Gammaproteobacteria.o\_\_Enterobacterales.f

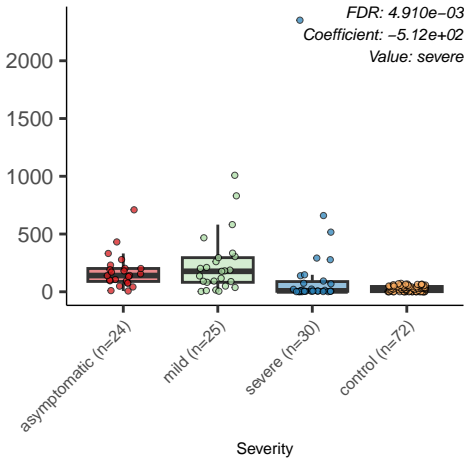



bacteria.c\_\_Gammaproteobacteria.o\_\_Enterobacterales.f\_\_Morganel

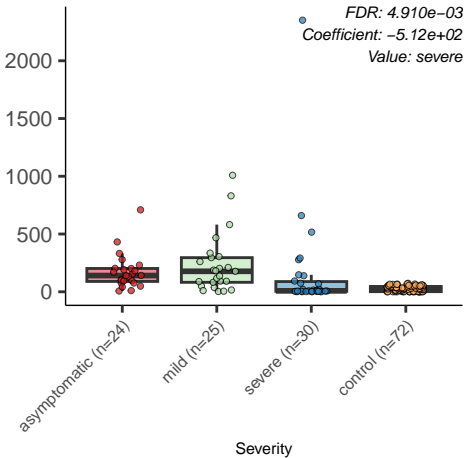

Bacteria.p\_Spirochaetes.c\_Spirochaetia.o\_Leptospirales.f\_Lept

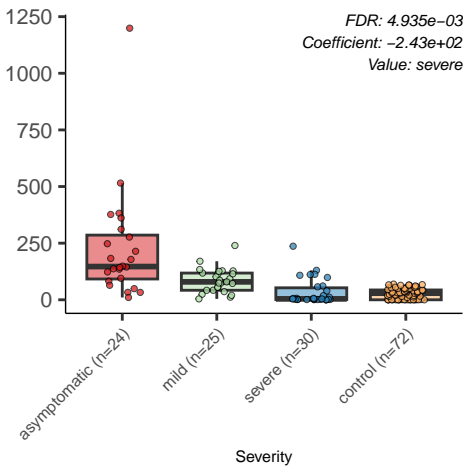

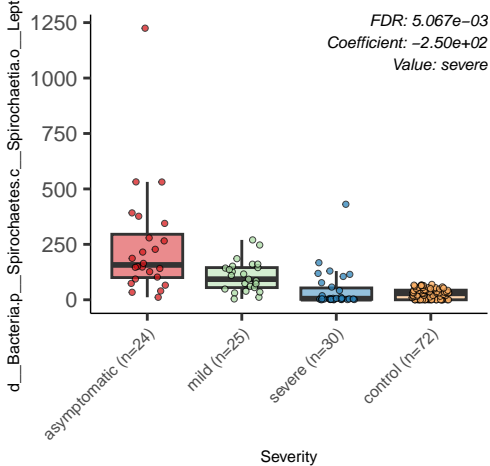

d\_Bacteria.p\_\_Spirochaetes.c\_\_Spirochaetia.o\_\_Leptospirales.

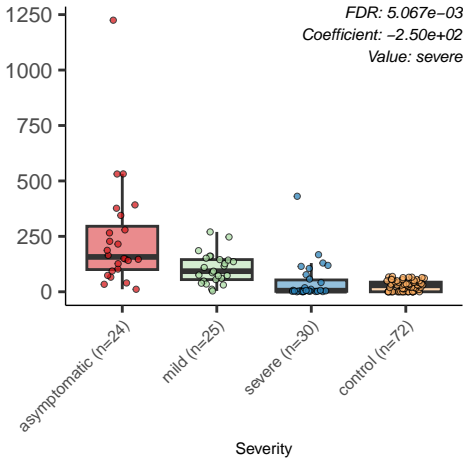

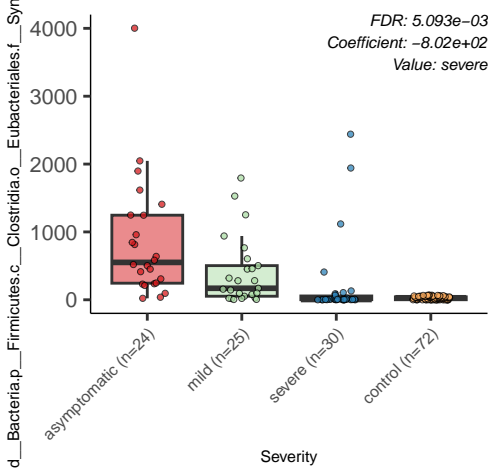

d\_\_Bacteria.p\_Actinobacteria.c\_Acidimicrobi

FDR:  $5.129 \times 10^{-3}$   
Coefficient:  $-2.59 \times 10^2$   
Value: mild

1000  
500  
0

asymptomatic (n=24)

mild (n=25)

severe (n=30)

control (n=72)

Severity

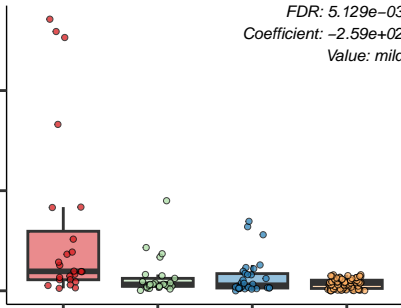

d\_Bacteria.p\_Actinobacteria.c\_Acidimicrobiia.o\_Acid

1000

500

0

asymptomatic (n=24)

mild (n=25)

severe (n=30)

control (n=72)

Severity

FDR:  $5.129 \times 10^{-3}$   
Coefficient:  $-2.59 \times 10^2$   
Value: mild

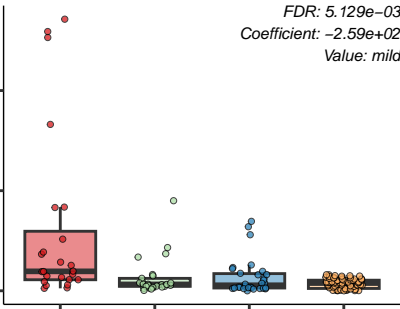

Firmicutes.c\_Bacilli.o\_Lactobacillales.f\_Streptococcaceae.g\_Str

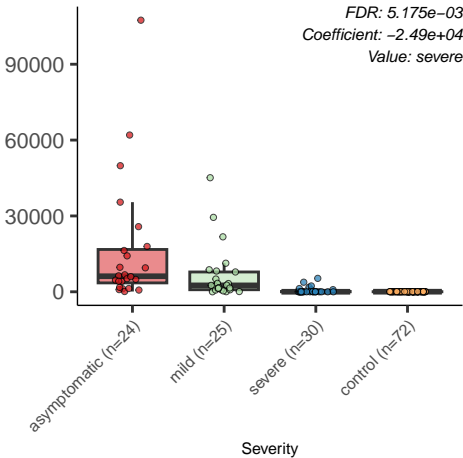



\_Bacteria.p\_\_Proteobacteria.c\_\_Alphaproteobacteria.o\_\_Rhodospirillum

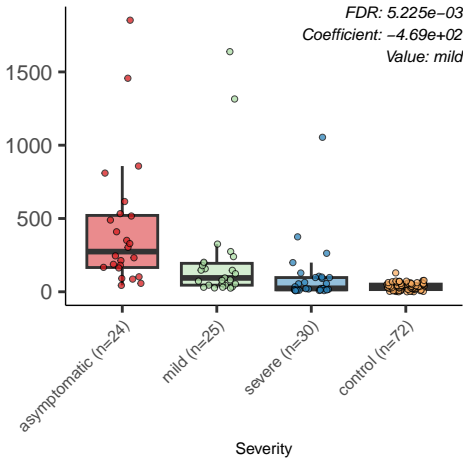

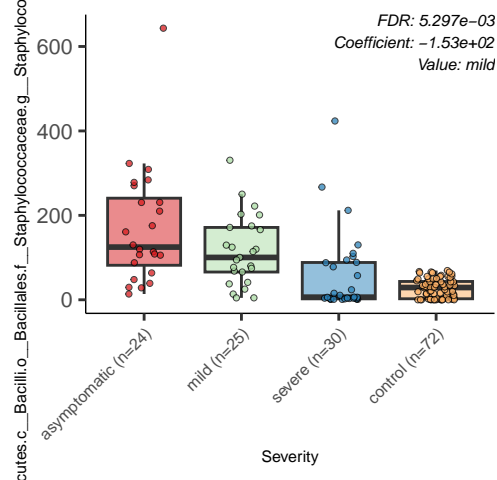

ia.p\_\_Cyanobacteria.o\_\_Nostocales.f\_\_Scytonemataceae.g\_\_Scyto

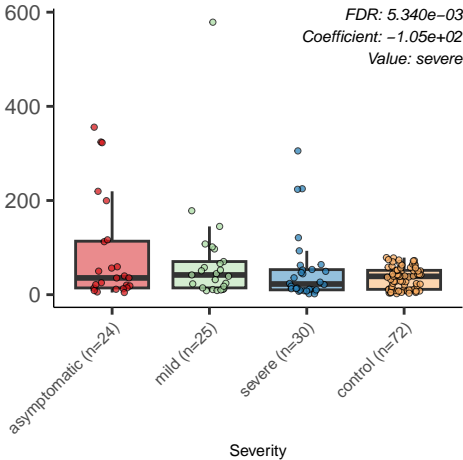

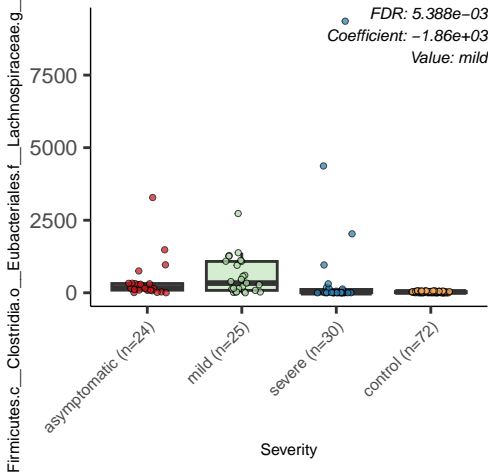

Firmicutes.c\_\_Bacilli.o\_\_Bacillales.f\_\_Staphylococcaceae.g\_\_Staph

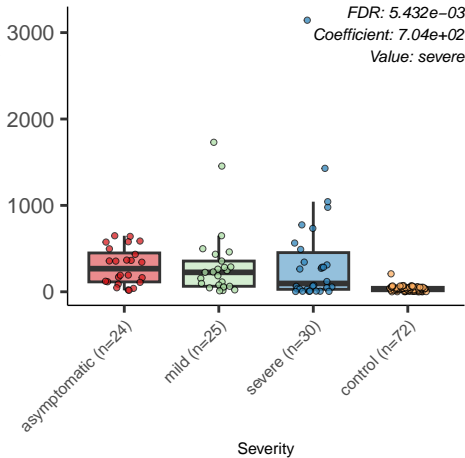

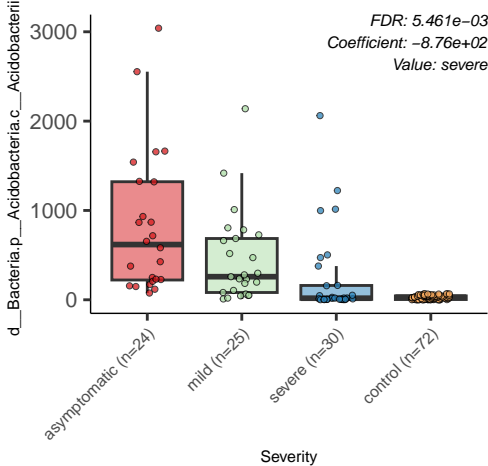

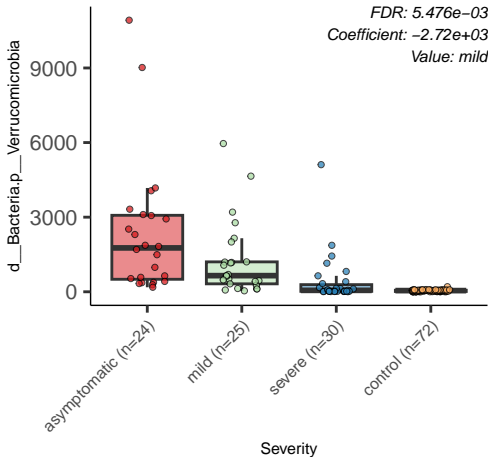

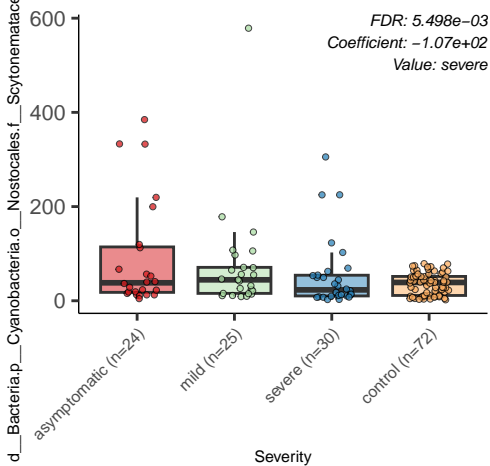



icutes.c\_\_Mollicutes.o\_\_Entomoplasmatales.f\_\_Spiroplasmataceae

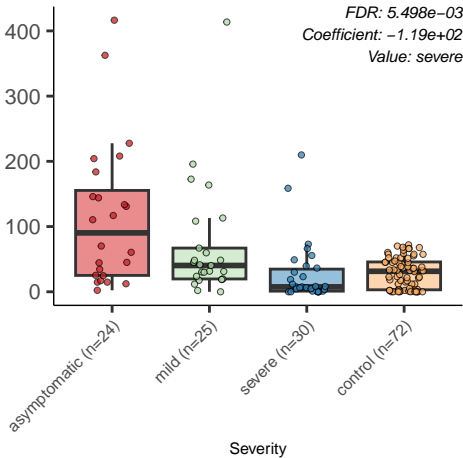

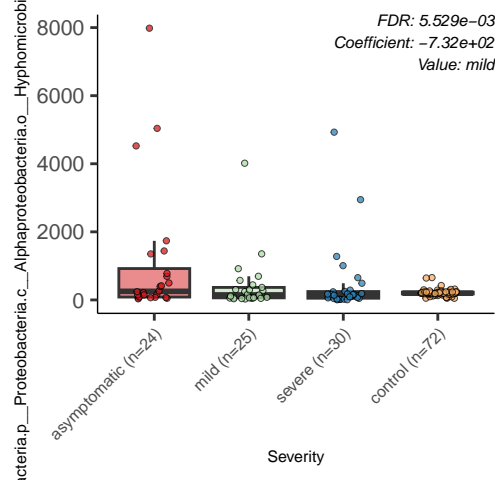

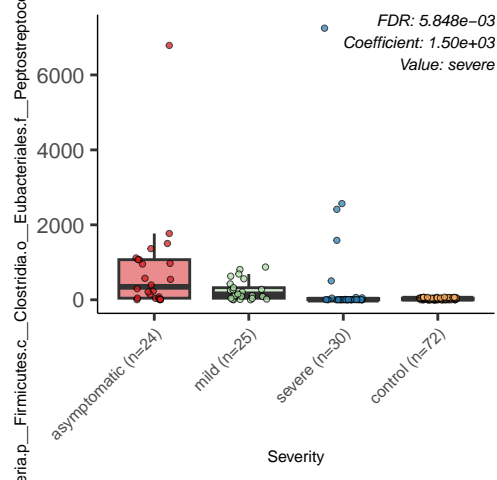

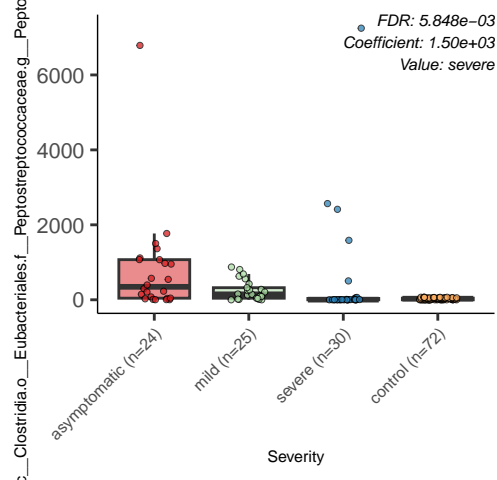

Bacteria.p\_\_Bacteroidetes.c\_\_Cytophagia.o\_\_Cytophagales.f\_\_Spir

*FDR: 5.851e-03*  
*Coefficient: -4.27e+02*  
*Value: mild*

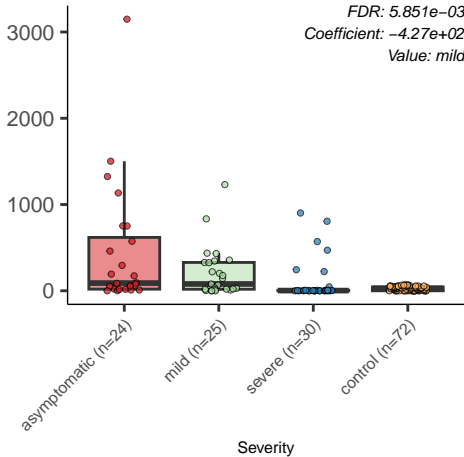

Bacteroidetes.c\_\_Cytophagia.o\_\_Cytophagales.f\_\_Spirosomaceae.g

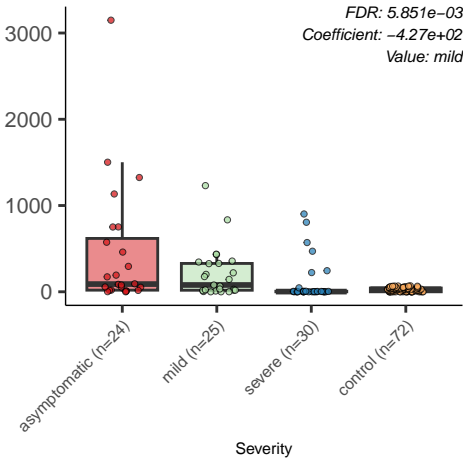

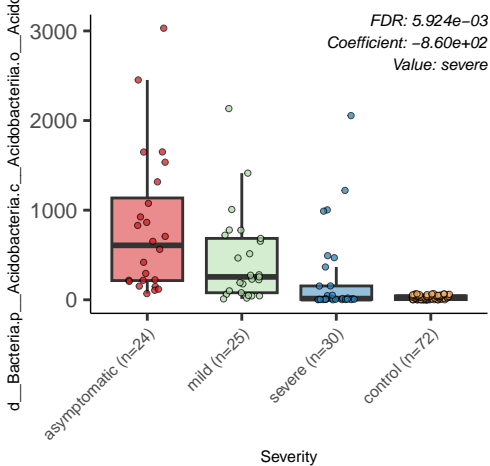

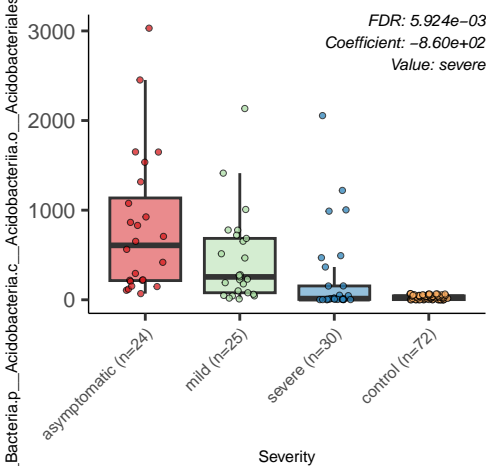



teria.p\_\_Proteobacteria.c\_\_Alphaproteobacteria.o\_\_Sphingomonad

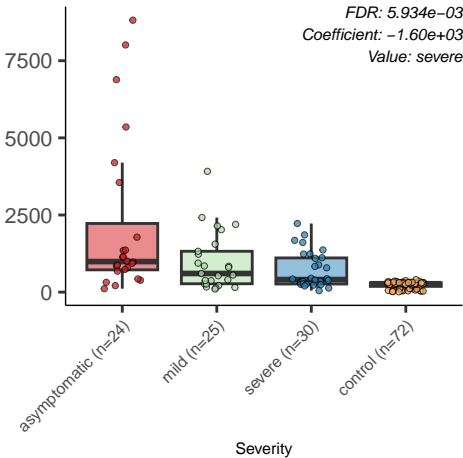

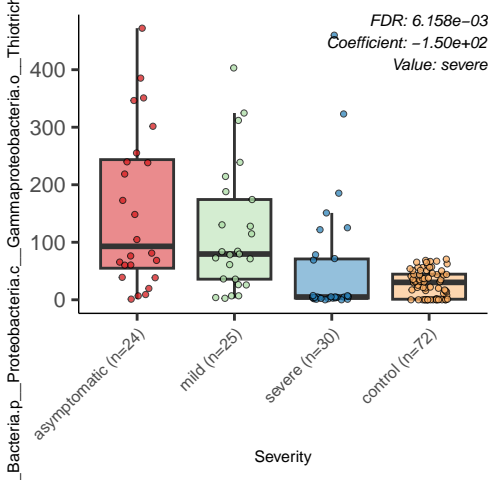

d\_\_Bacteria.p\_\_Armatimonadetes.c\_\_Fimbrimona

FDR: 6.222e-03  
Coefficient: -1.24e+02  
Value: mild

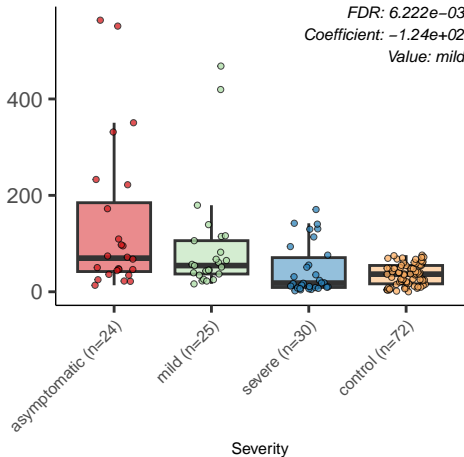

d\_Bacteria.p\_Armatimonadetes.c\_Fimbrimonadia.o\_Fin

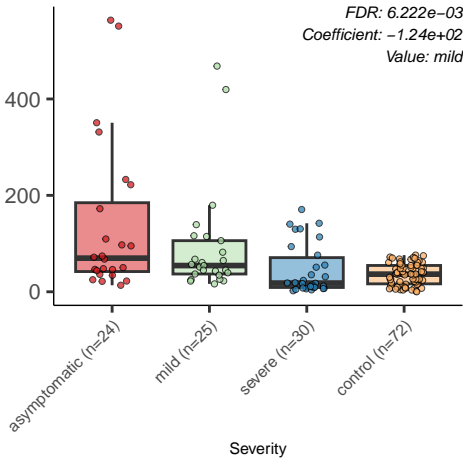

acteria.p\_\_Armatimonadetes.c\_\_Fimbrimonadia.o\_\_Fimbrimonadaceae

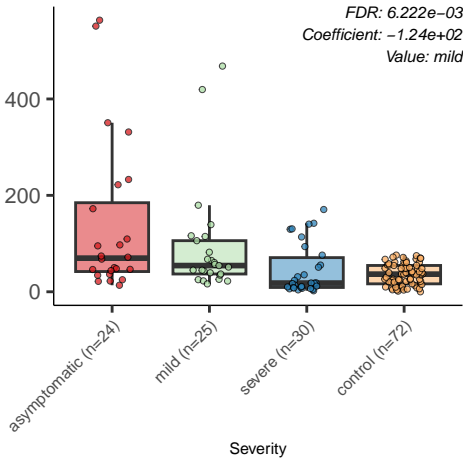

Armatimonadetes.c\_Fimbrimonadia.o\_Fimbrimonadales.f\_Fi

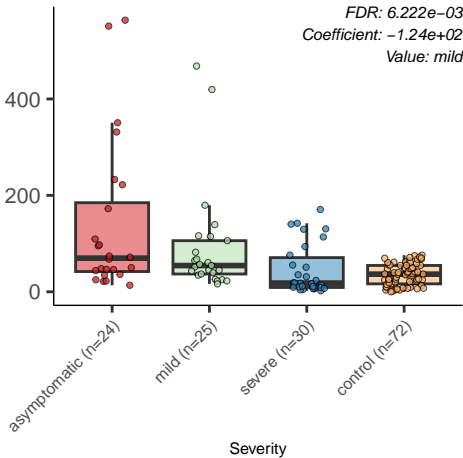

detes.c\_\_Fimbrimonadia.o\_\_Fimbrimonadales.f\_\_Fimbrimonadace

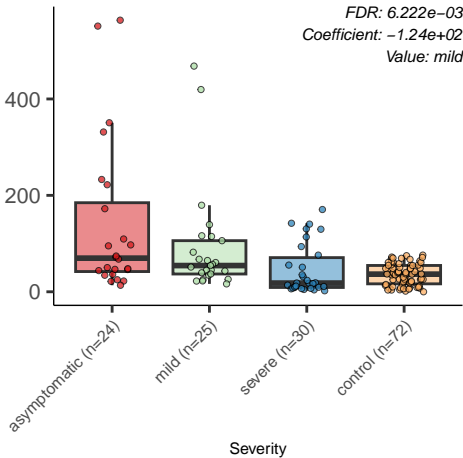

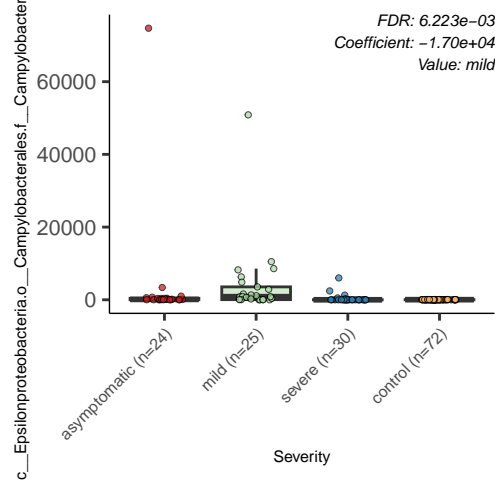



bacteria.c\_\_Fusobacteriia.o\_\_Fusobacteriales.f\_\_Leptotrichiaceae

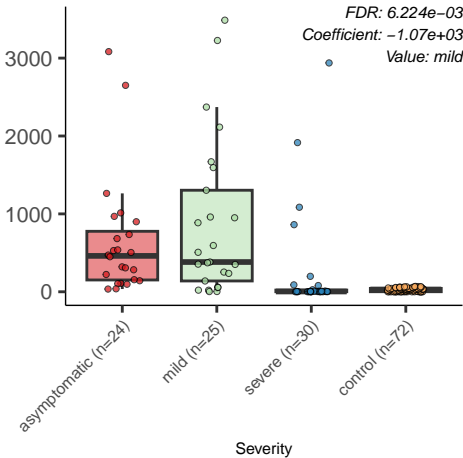

Bacteria.p\_\_Proteobacteria.c\_\_Alphaproteobacteria.o\_\_Rhodospirillum

FDR: 6.256e-03  
Coefficient: -7.56e+02  
Value: severe

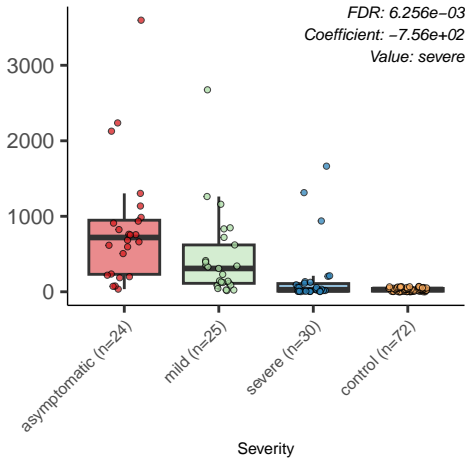

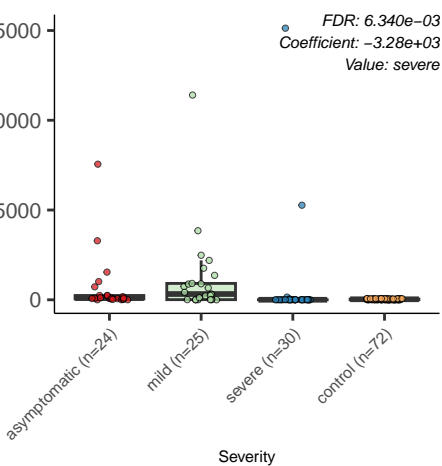

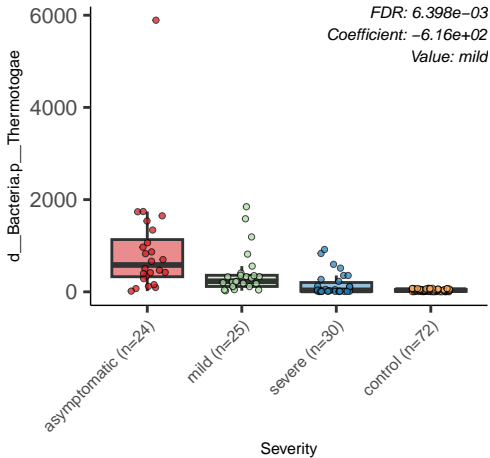

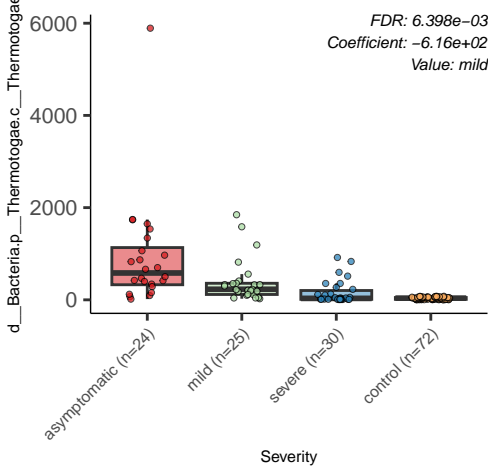

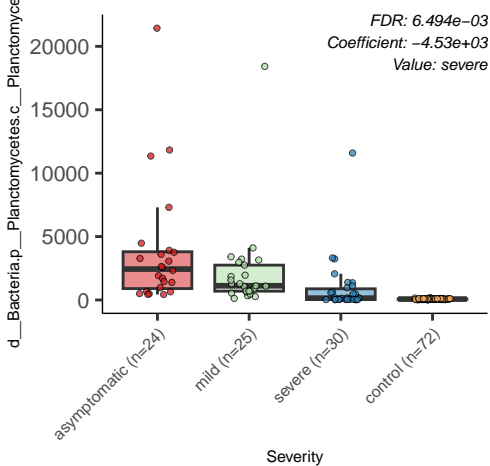

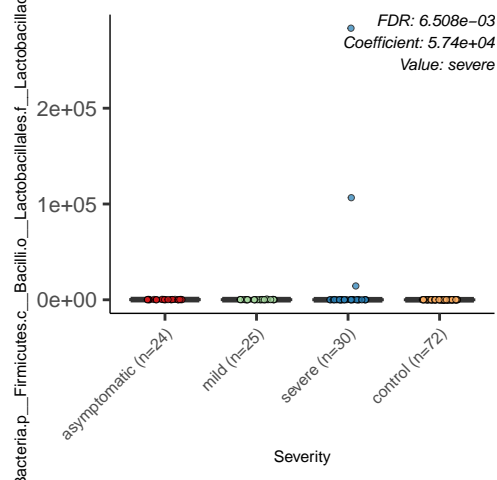

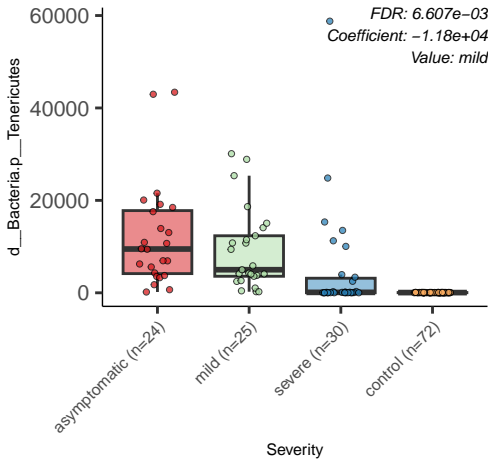



ia.p\_\_Verrucomicrobia.c\_\_Opitutae.o\_\_Puniceicoccales.f\_\_Puniceell

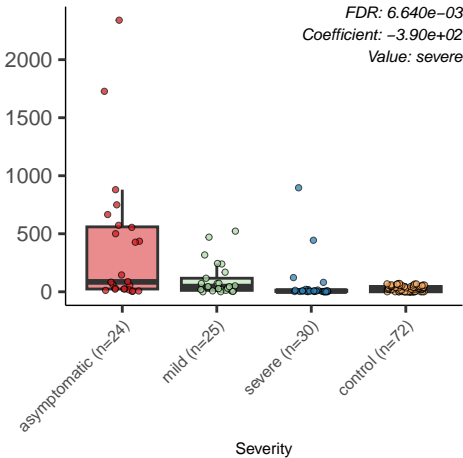

crobia.c\_\_Opitutae.o\_\_Puniceicoccales.f\_\_Puniceicoccaceae.g\_\_C

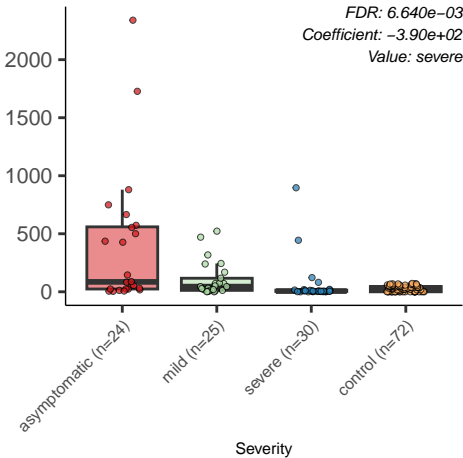

d\_Bacteria.p\_Bacteroidetes.c\_Cytophagia.o\_Cytophagales.

20000

15000

10000

5000

0

asymptomatic (n=24)

mild (n=25)

severe (n=30)

control (n=72)

Severity

FDR:  $6.732e-03$   
Coefficient:  $-3.41e+03$   
Value: severe

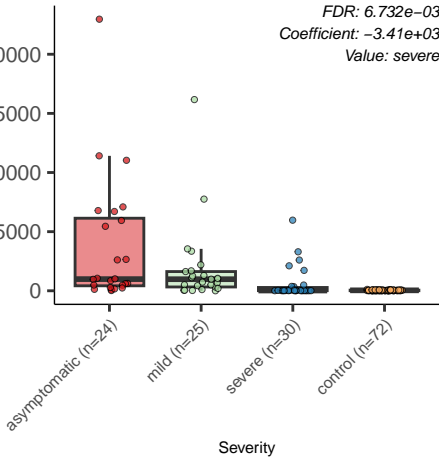

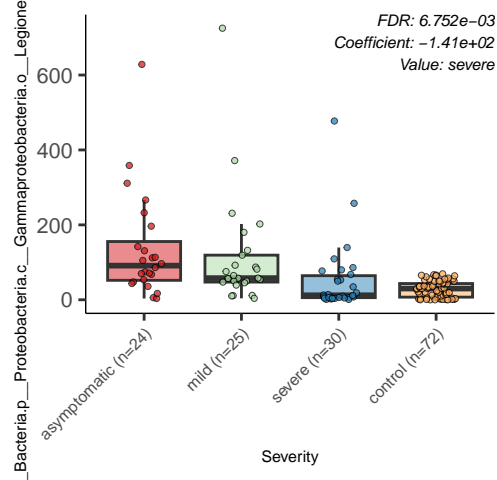

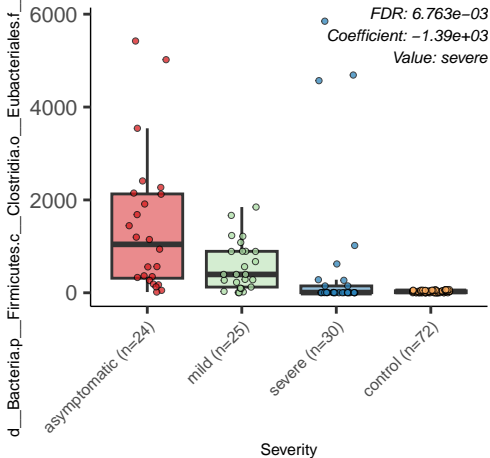

d\_Bacteria.p\_Tenericutes.c\_Mollicutes.o\_Entomoplasmatales.f

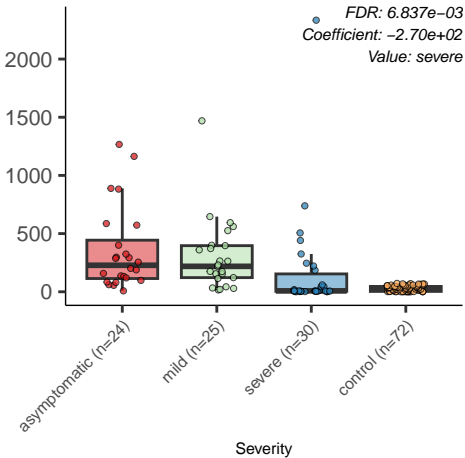

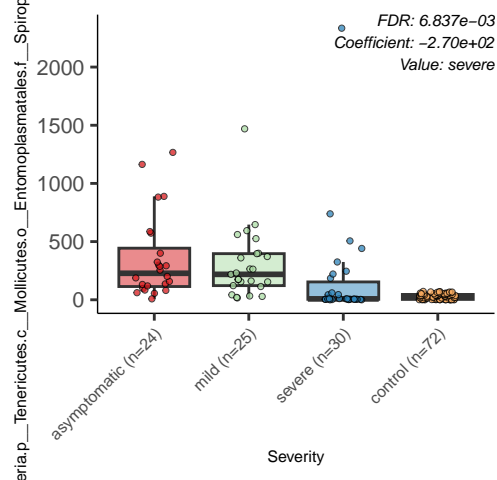

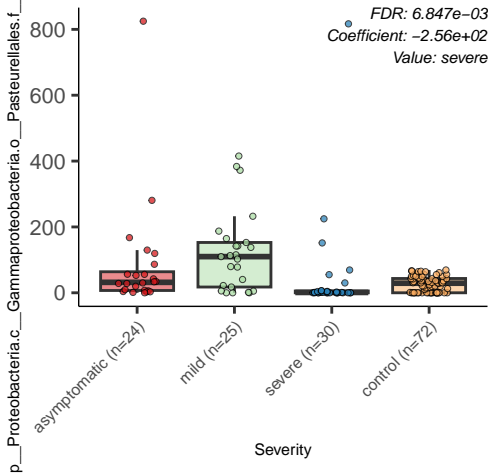



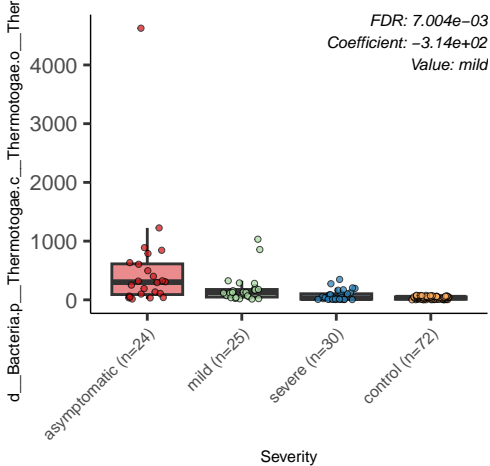

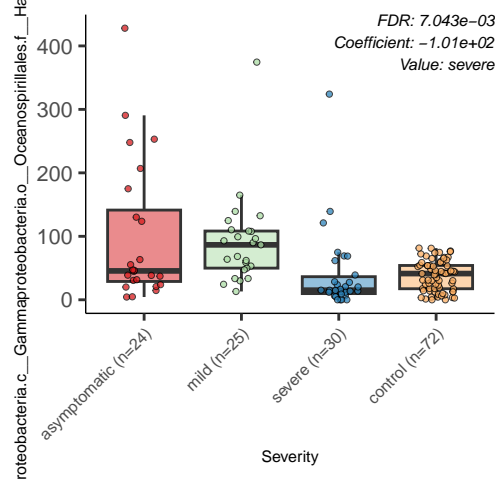

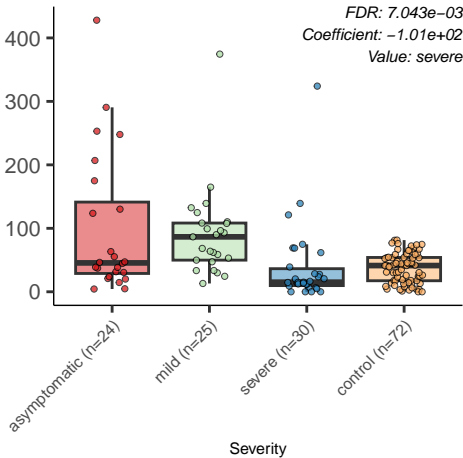

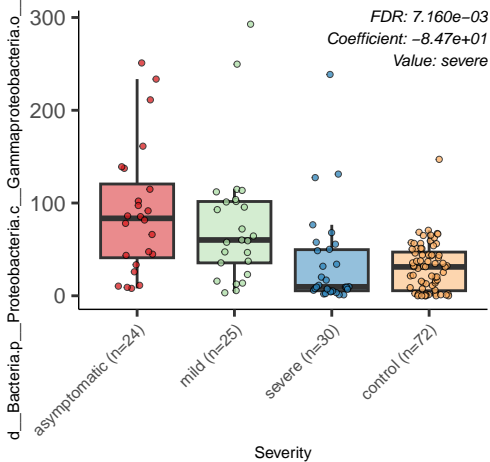

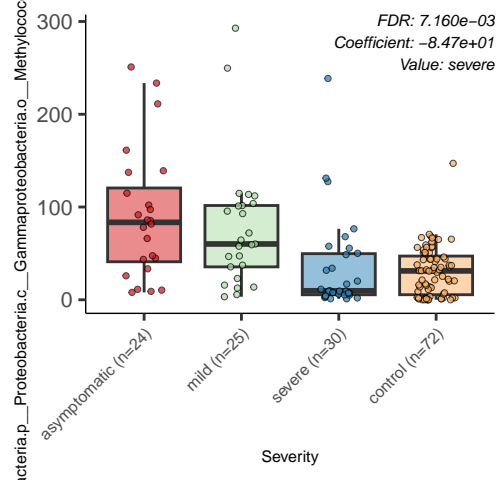

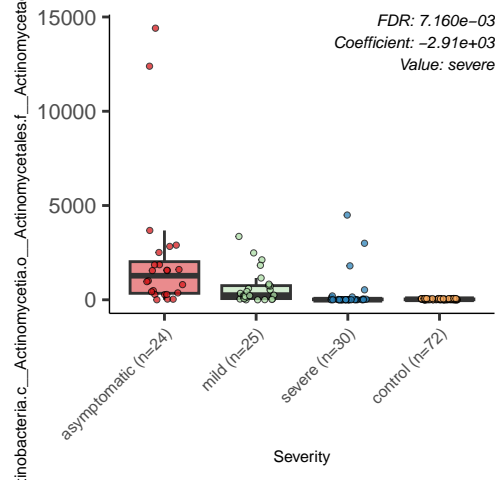

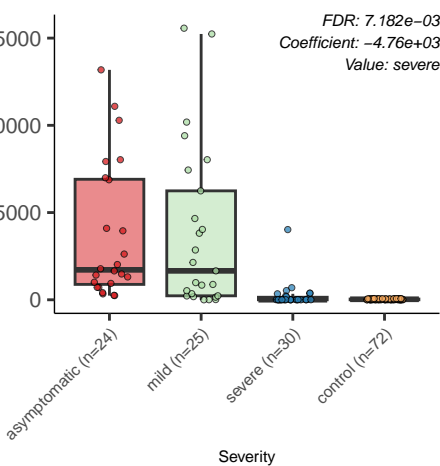

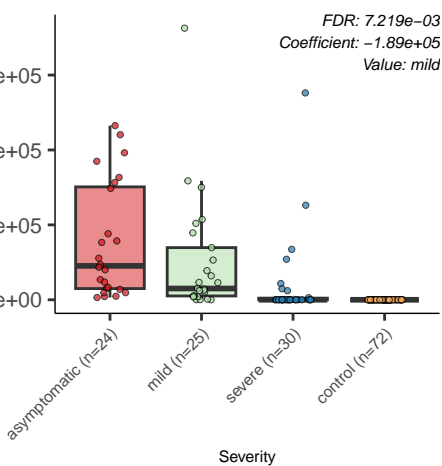



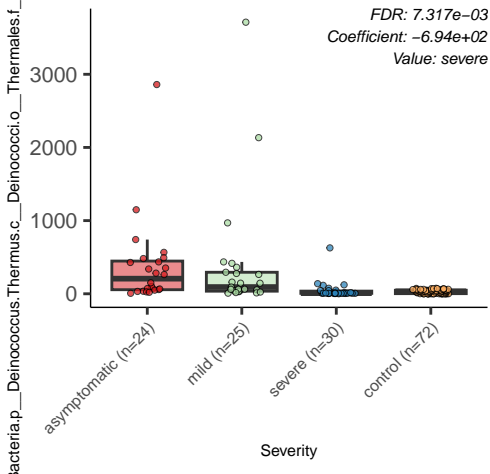

ria.p\_Acidobacteria.c\_Acidobacteriia.o\_Acidobacteriales.f\_Aci

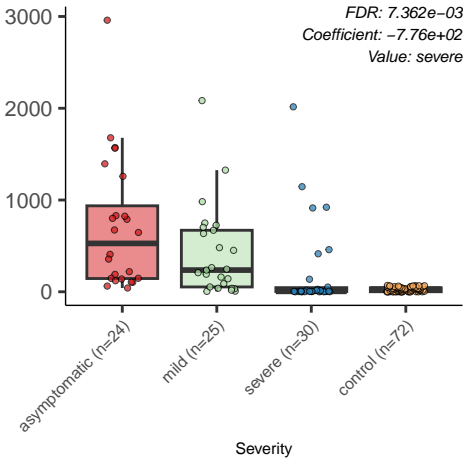

ia.p\_\_Proteobacteria.c\_\_Gammaproteobacteria.o\_\_Legionellales.f

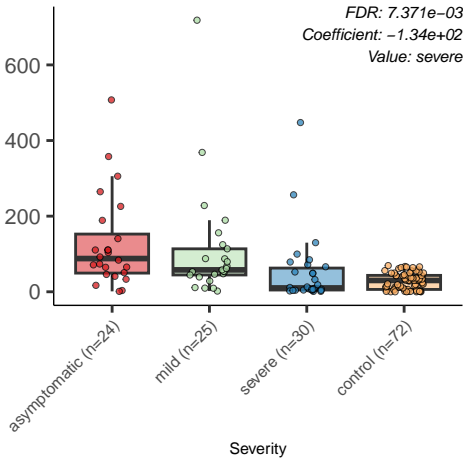

Bacteroidetes.c\_Bacteroidia.o\_Bacteroidales.f\_Prevotellaceae

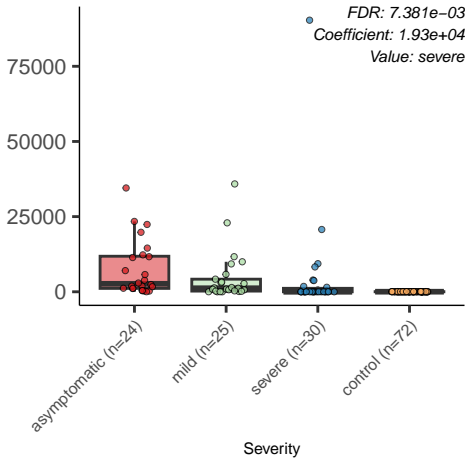

\_\_Bacteria.p\_\_Actinobacteria.c\_\_Actinomycetia.o\_\_Micrococcales.f.

FDR:  $7.394e-03$   
Coefficient:  $-2.95e+02$   
Value: mild

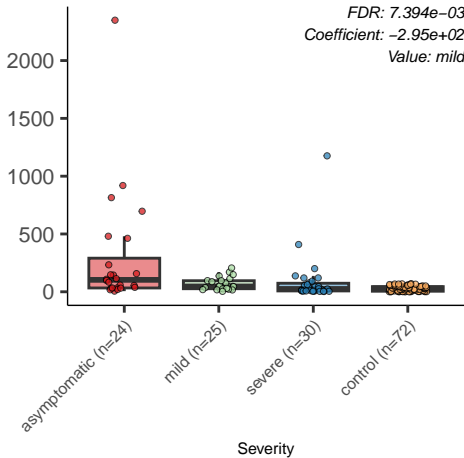

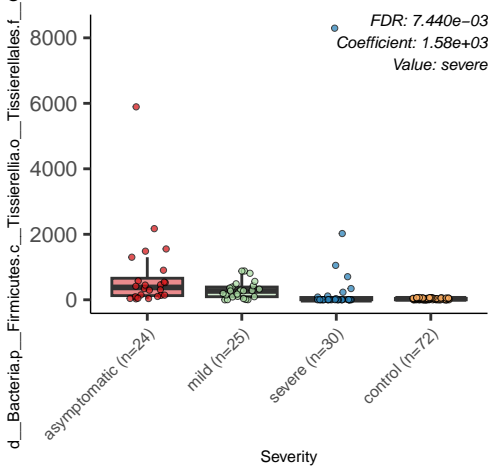

Bacteria.p\_Firmicutes.c\_Tissierellia.o\_Tissierellales.f\_Gottschalkia.g

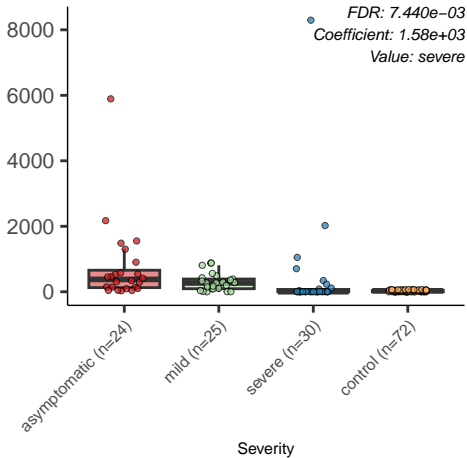

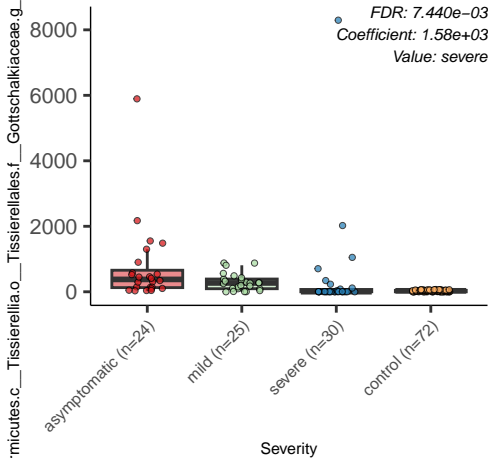



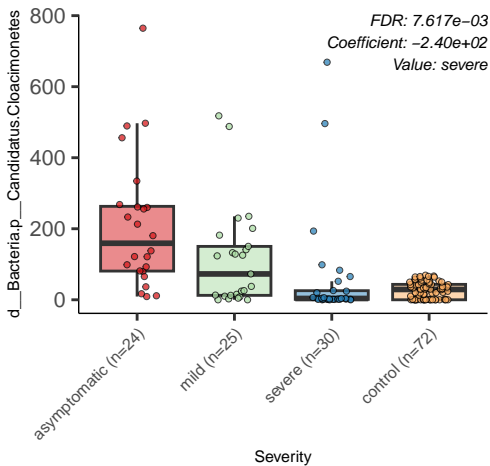

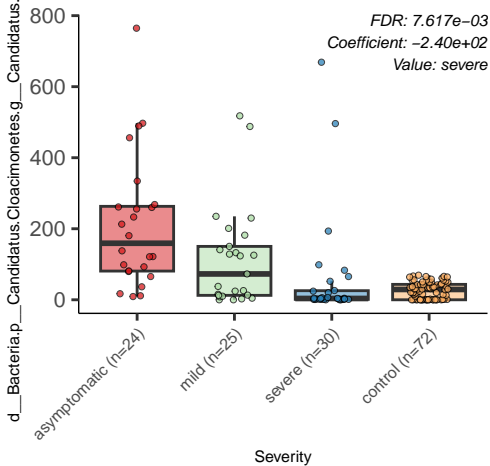

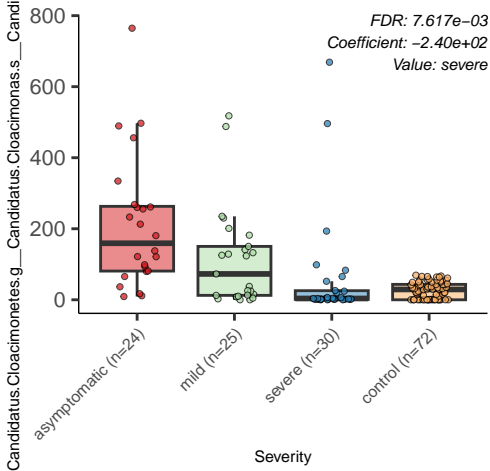

d\_Bacteria.p\_Actinobacteria.c\_Actinomycetia.o\_Strep

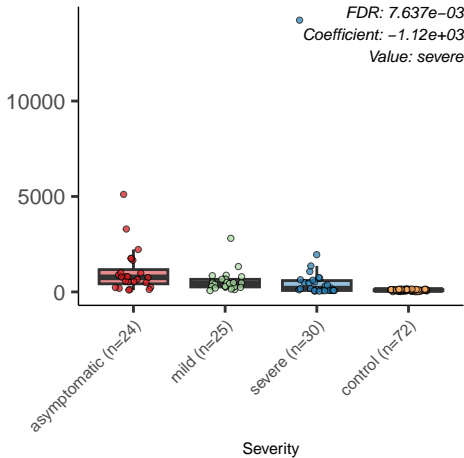

Bacteria.p\_Actinobacteria.c\_Actinomycetia.o\_Streptomycetale

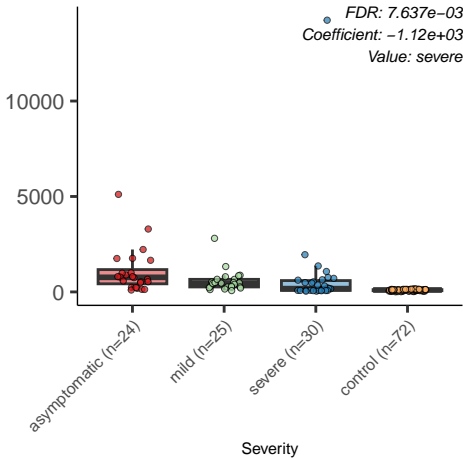



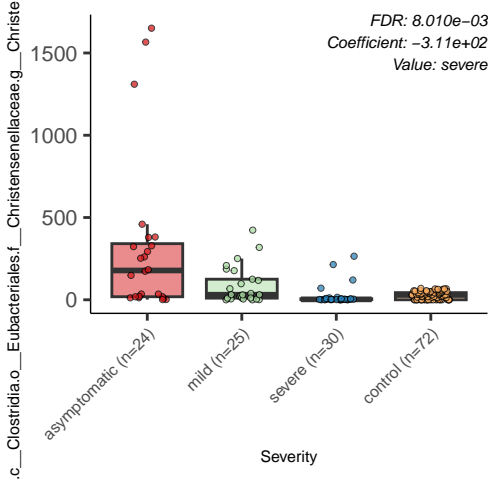

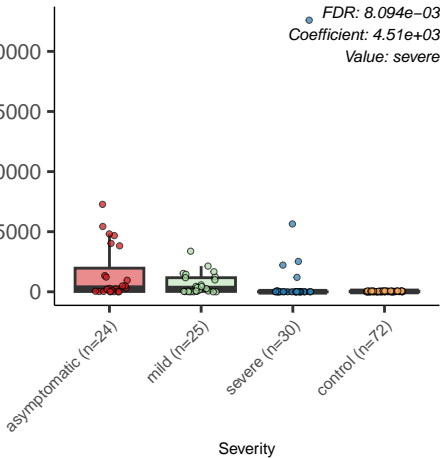



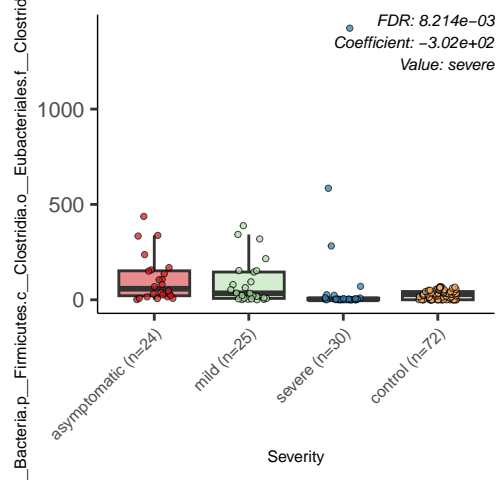

FDR:  $8.214e-03$   
Coefficient:  $-3.02e+02$   
Value: severe

1000

500

0

asymptomatic (n=24)

mild (n=25)

severe (n=30)

control (n=72)

Severity

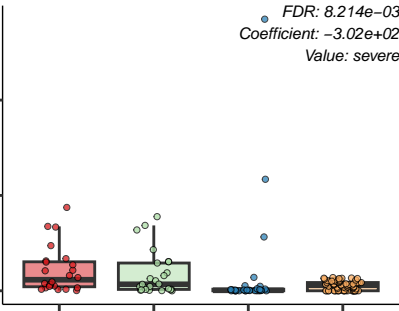

Firmicutes.c\_\_Bacilli.o\_\_Lactobacillales.f\_\_Streptococcaceae.g\_\_S

FDR:  $8.214e-03$   
Coefficient:  $-8.46e+04$   
Value: severe

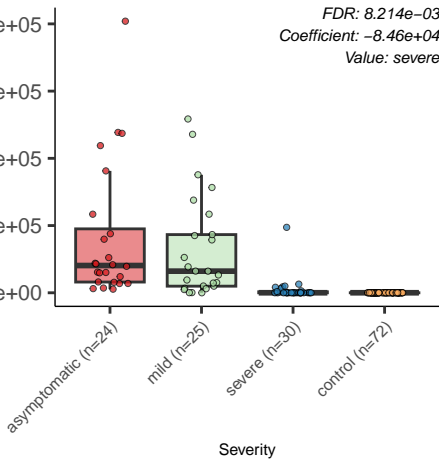

Bacteria.p\_Firmicutes.c\_Clostridia.o\_Eubacteriales.f\_Eubacter

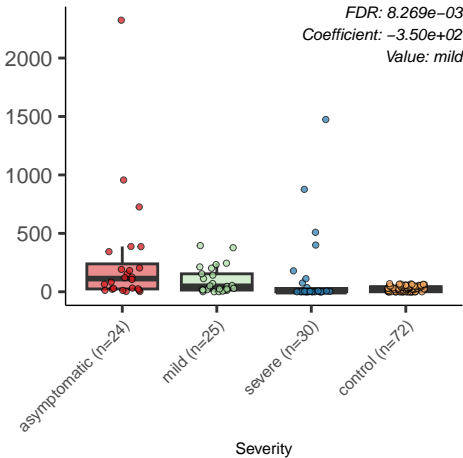

Firmicutes.c\_\_Clostridia.o\_\_Eubacteriales.f\_\_Eubacteriaceae.g\_\_A

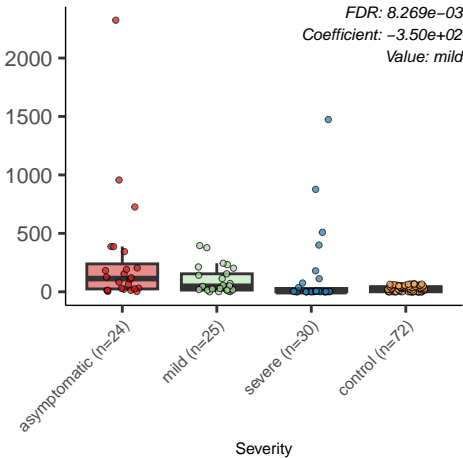

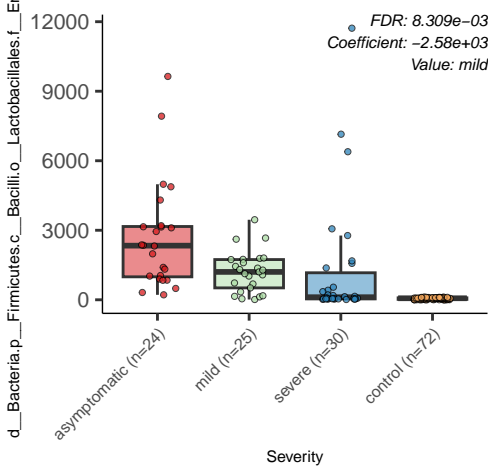

d\_Bacteria.p\_Bacteroidetes.c\_Cytophagia

FDR:  $8.527e-03$   
Coefficient:  $-1.64e+04$   
Value: mild

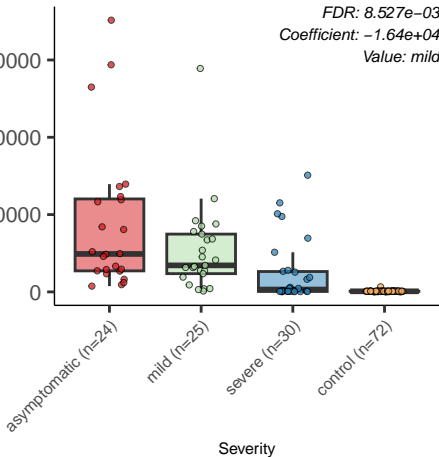

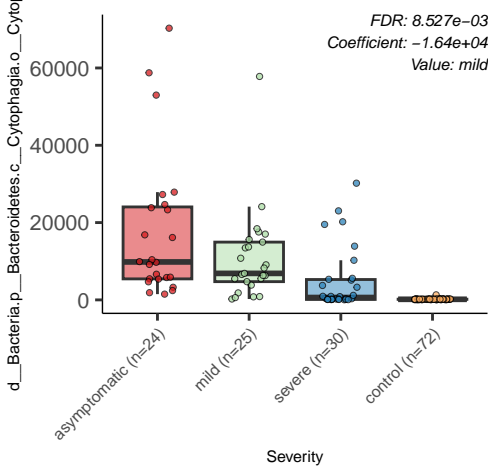



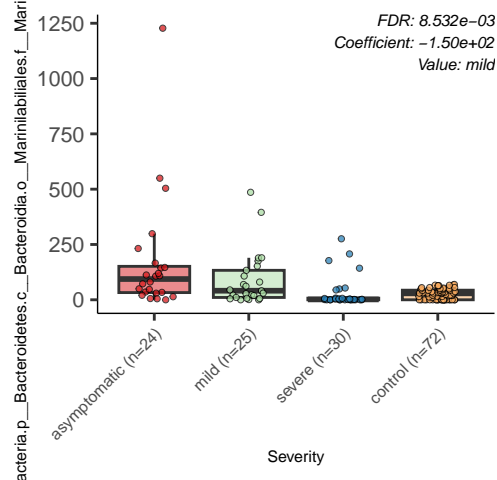

cteroidetes.c\_\_Bacteroidia.o\_\_Marinilabiales.f\_\_Marinilabiales.g\_\_

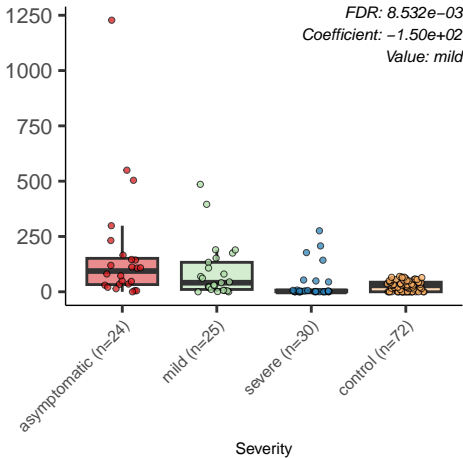

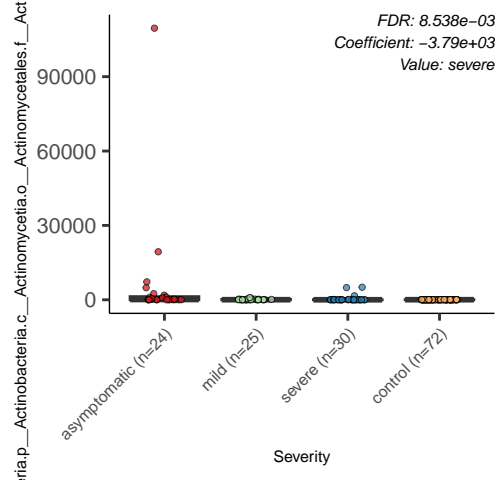

Actinomyces c. Actinomyces o. Actinomyces f. Actinomyces

FDR:  $8.538e-03$   
Coefficient:  $-3.79e+03$   
Value: severe

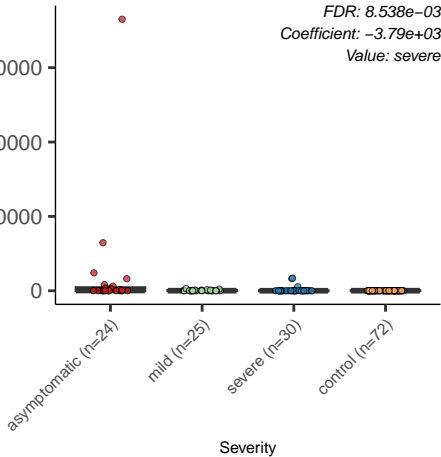

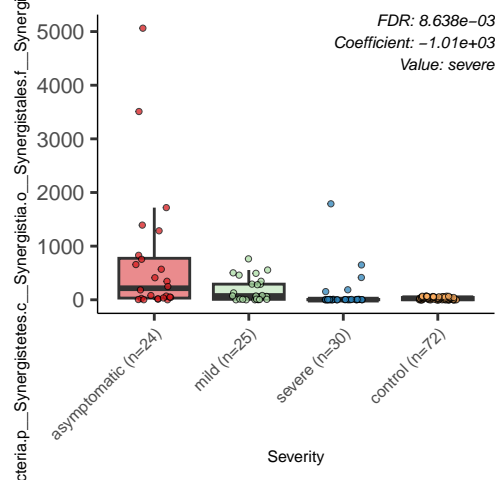

rgistetes.c\_\_Synergistia.o\_\_Synergistales.f\_\_Synergistaceae.g\_\_Py

FDR:  $8.638e-03$   
Coefficient:  $-1.01e+03$   
Value: severe

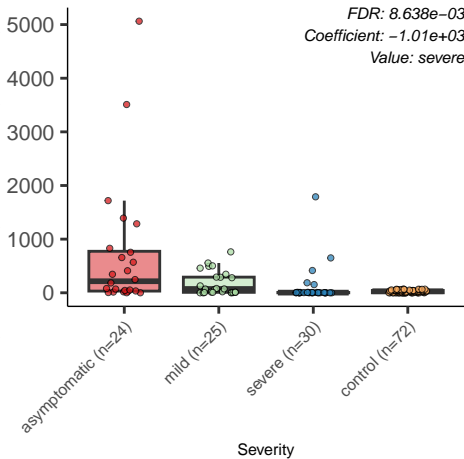

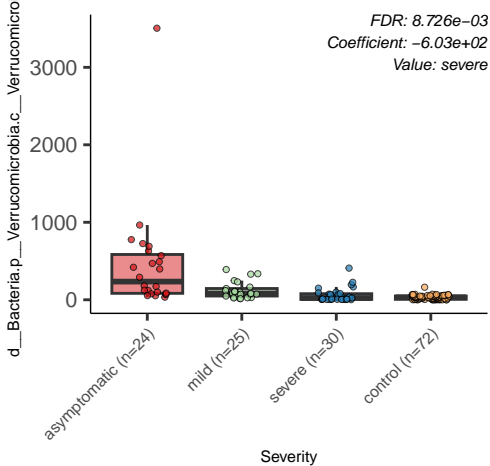

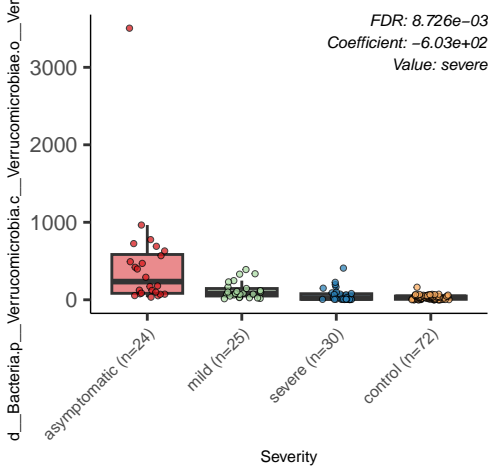



obacteria.c\_\_Gammaproteobacteria.o\_\_Enterobacterales.f\_\_Yersini

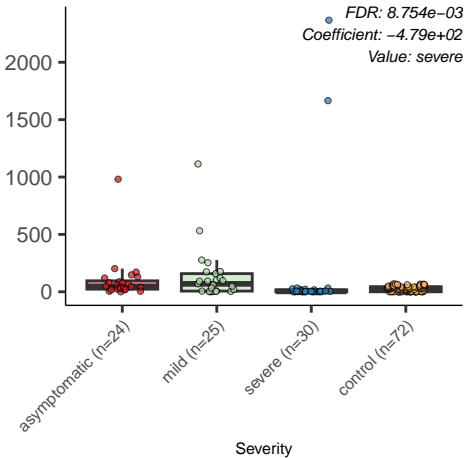

ria.p\_\_Fusobacteria.c\_\_Fusobacteriia.o\_\_Fusobacteriales.f\_\_Fusob

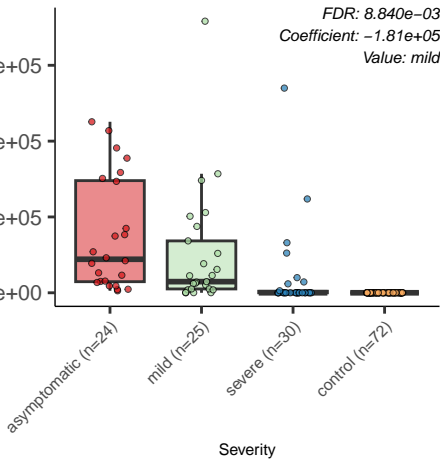

Gammaaproteobacteria.o\_\_Pasteurellales.f\_\_Pasteurellaceae.g\_\_Ag

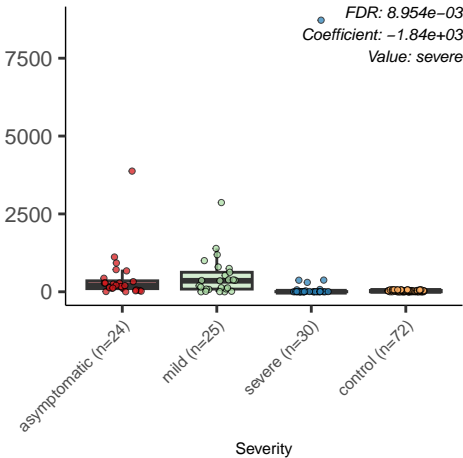

eroidetes.c\_\_Bacteroidia.o\_\_Bacteroidales.f\_\_Bacteroidaceae.g\_\_B

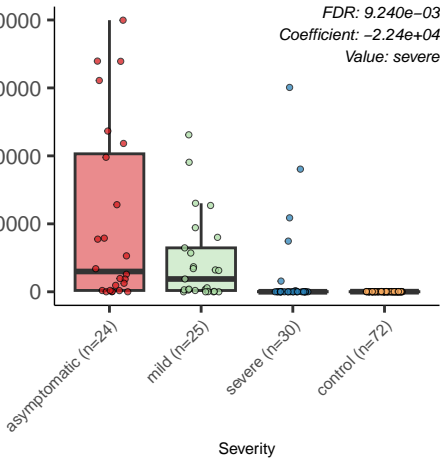

d\_Bacteria.p\_\_Proteobacteria.c\_\_Alphaproteobacteria.o\_\_R

10000

5000

0

asymptomatic (n=24)

mild (n=25)

severe (n=30)

control (n=72)

Severity

FDR:  $9.248e-03$   
Coefficient:  $-2.43e+03$   
Value: severe

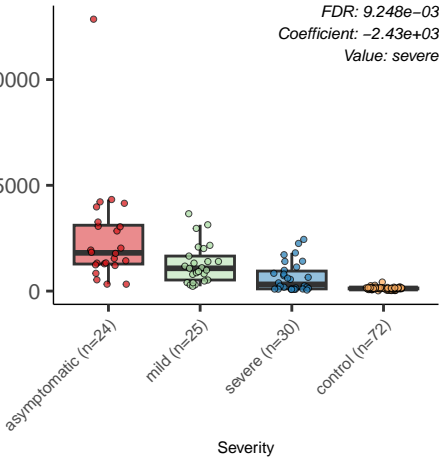

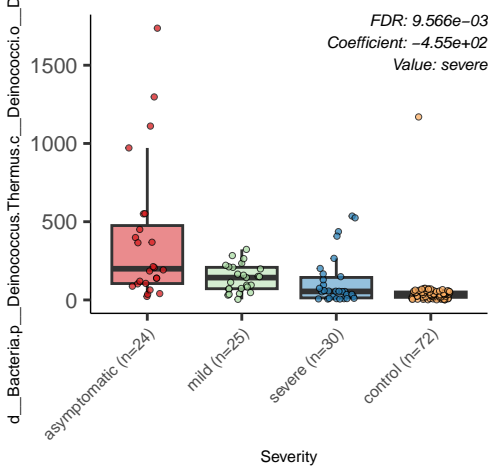

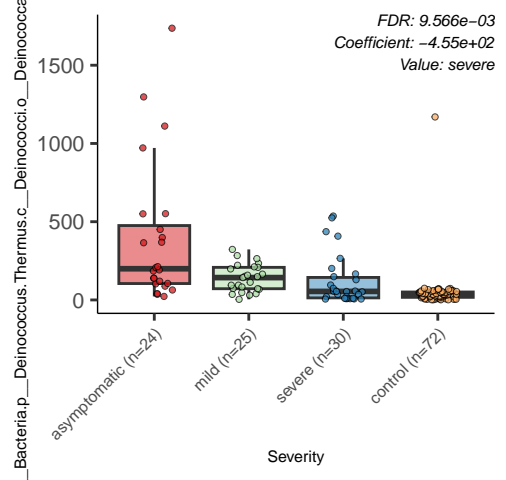

a.p.\_Deinococcus.Thermus.c.\_Deinococci.o.\_Deinococcales.f.\_D

FDR:  $9.566e-03$   
Coefficient:  $-4.55e+02$   
Value: severe

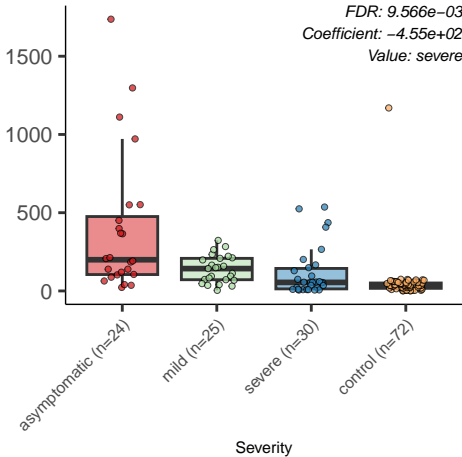



oacteria.c\_Acidobacteriia.o\_Acidobacteriales.f\_Acidobacteriaceae

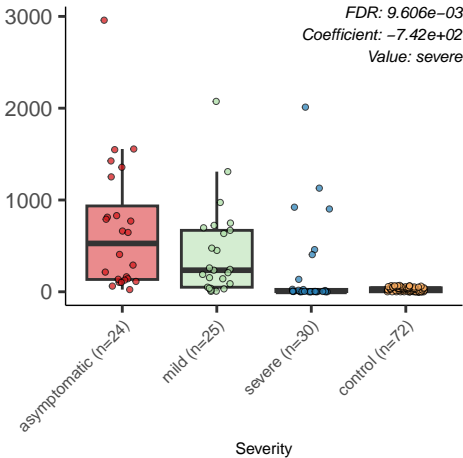

d\_Bacteria.p\_\_Proteobacteria.c\_\_Deltaproteobac

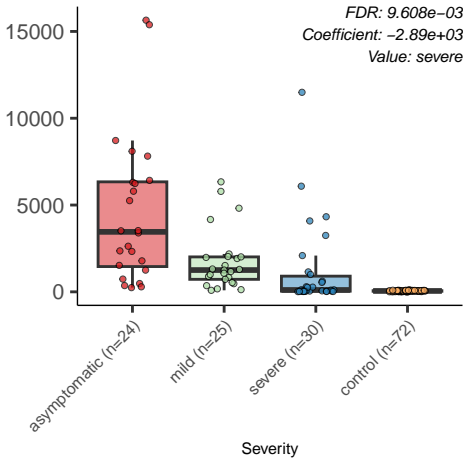

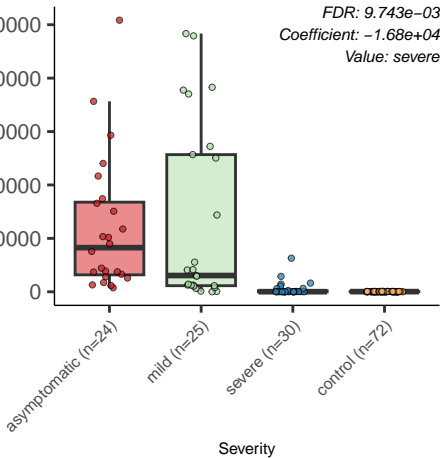

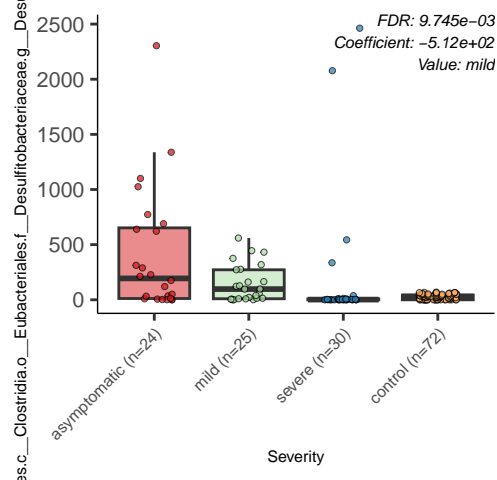

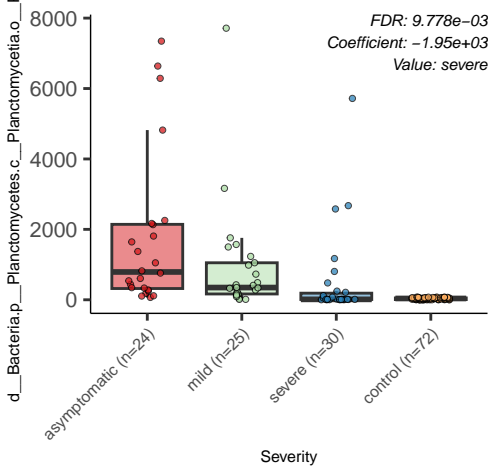

a.p\_\_Proteobacteria.c\_\_Alphaproteobacteria.o\_\_Rhodospirillales.f\_\_

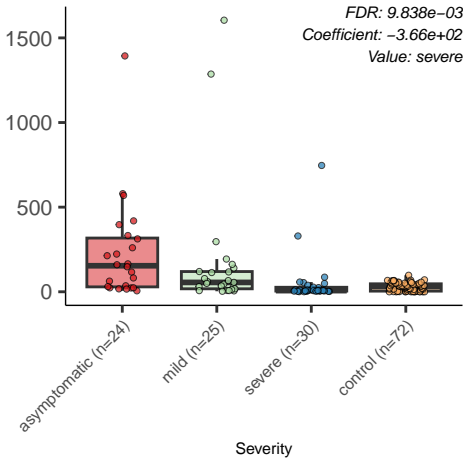

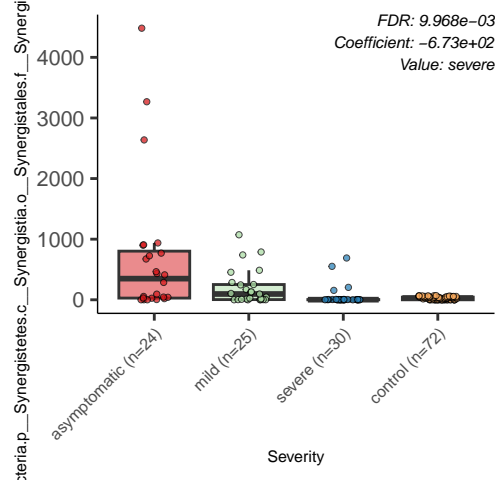

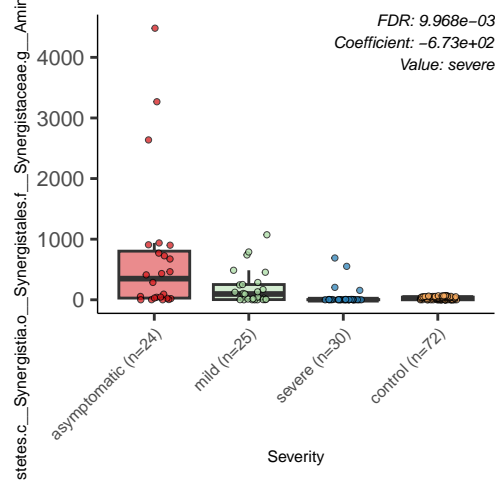



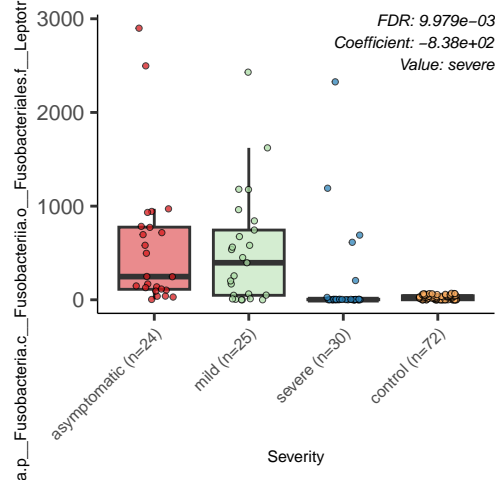

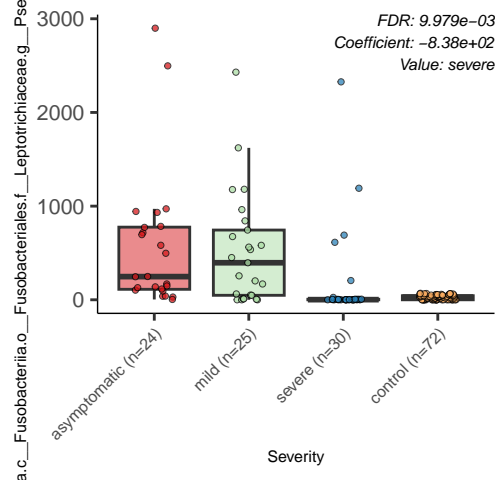

cteria.p\_\_Proteobacteria.c\_\_Alphaproteobacteria.o\_\_Hyphomicrobia

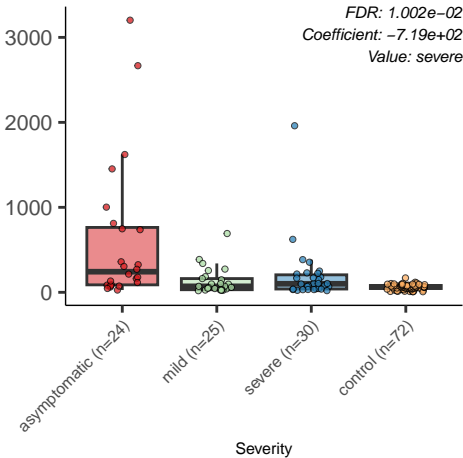

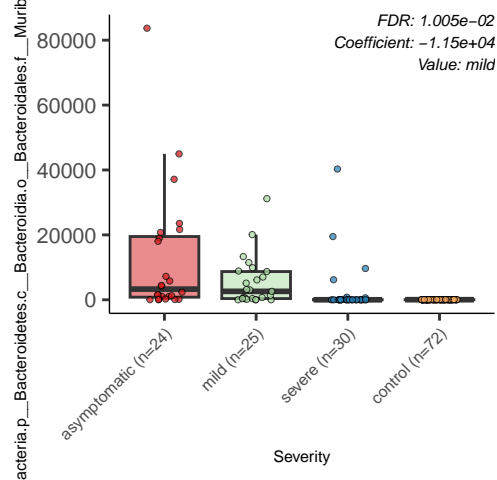

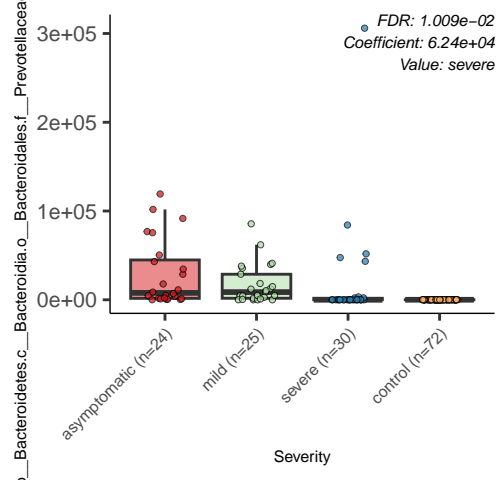

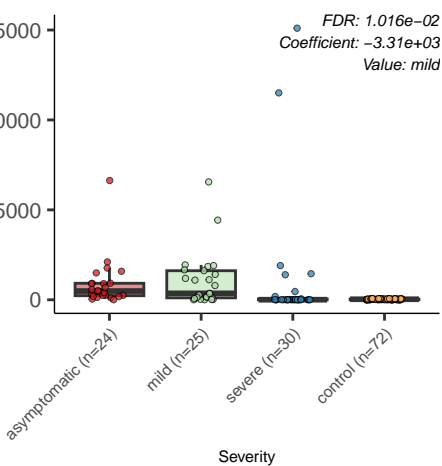

firmicutes.c\_Bacilli.o\_Lactobacillales.f\_Streptococcaceae.g\_Str

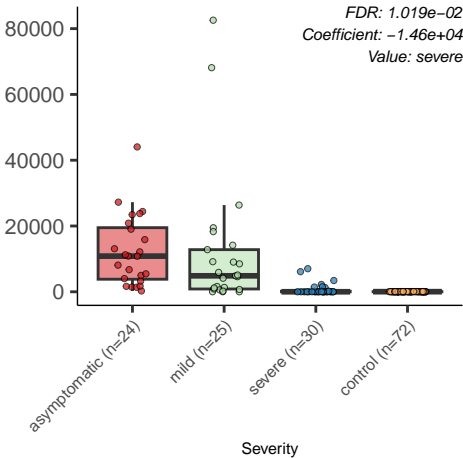

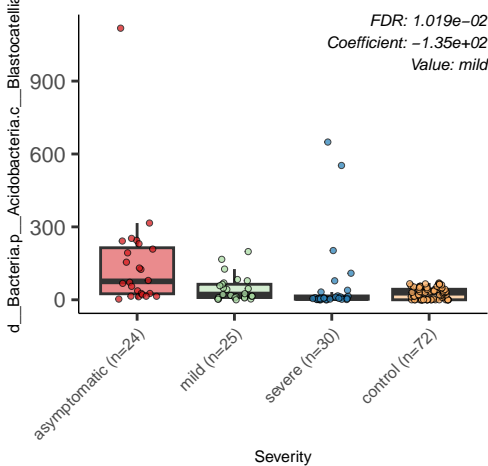



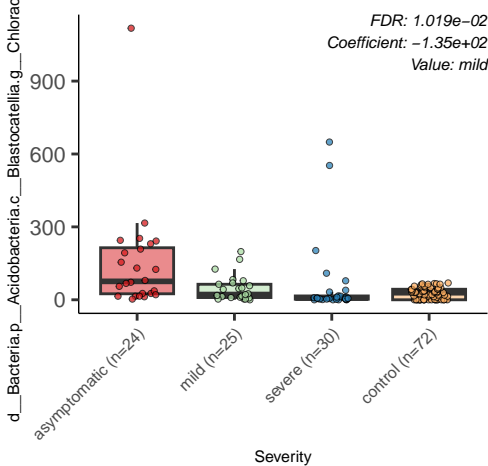

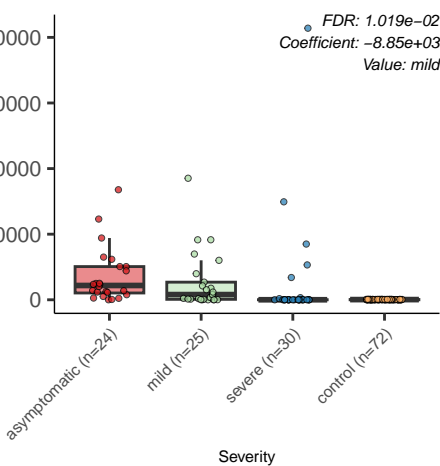

d\_\_Bacteria.p\_\_Bacteroidetes.c\_\_Cytophagia.o\_\_Cytophagales.

20000

15000

10000

5000

0

asymptomatic (n=24)

mild (n=25)

severe (n=30)

control (n=72)

Severity

FDR:  $1.034e-02$

Coefficient:  $-3.14e+03$

Value: mild

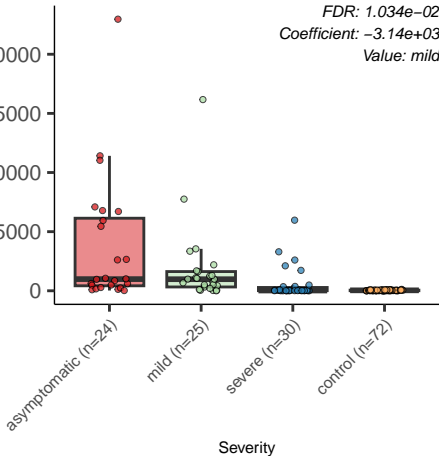

chaetes.c\_\_Spirochaetia.o\_\_Spirochaetales.f\_\_Treponemataceae.g

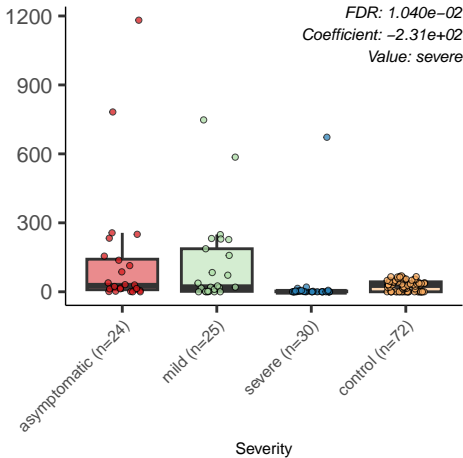

Bacteria.p\_Firmicutes.c\_Bacilli.o\_Bacillales.f\_Bacillaceae.g\_B

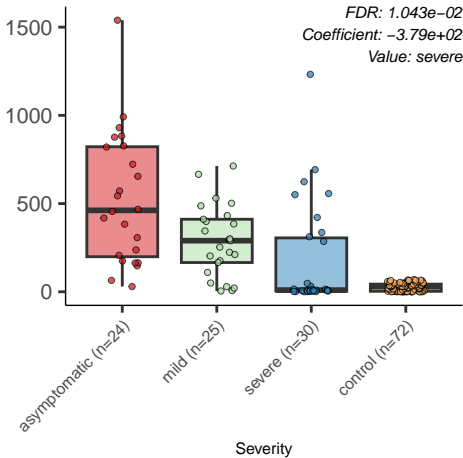

a.p\_Actinobacteria.c\_Actinomycetia.o\_Streptomycetales.f\_Stre

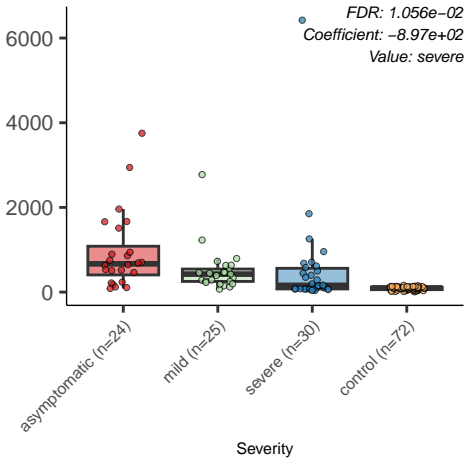

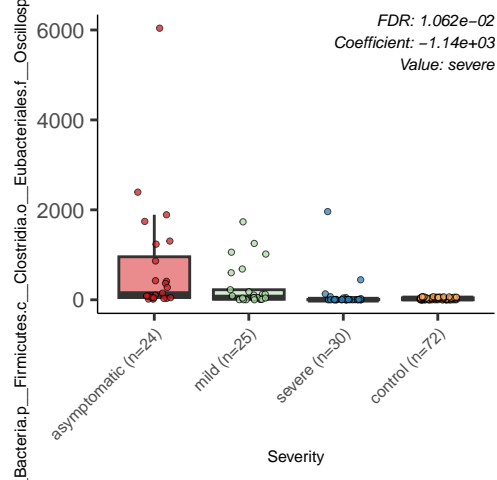

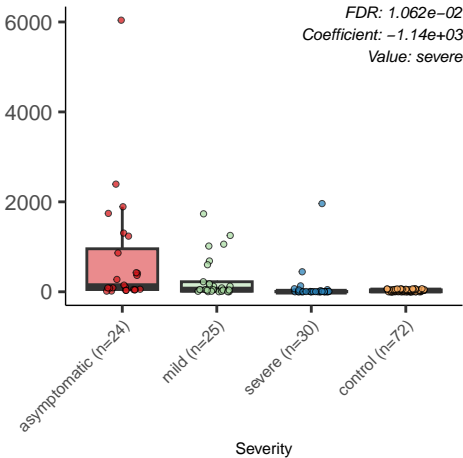



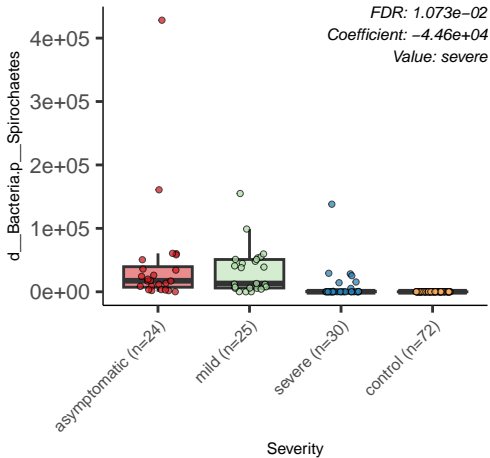

d\_\_Bacteria.p\_\_Spirochaetes.c\_\_Spirochaetia

FDR:  $1.073e-02$   
Coefficient:  $-4.46e+04$   
Value: severe

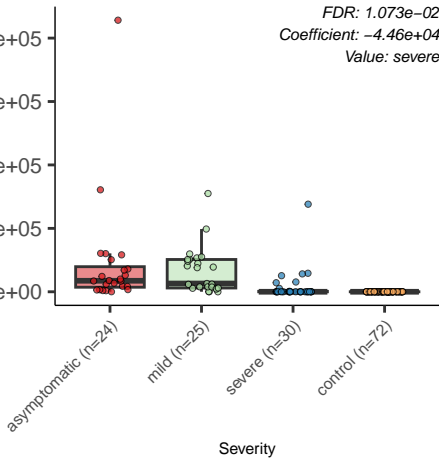

es.c\_\_Negativicutes.o\_\_Selenomonadales.f\_\_Selenomonadaceae.g\_\_

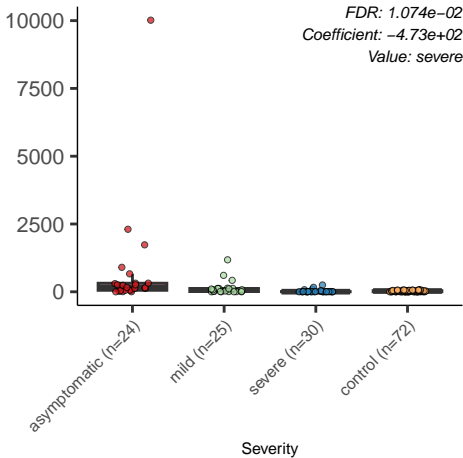

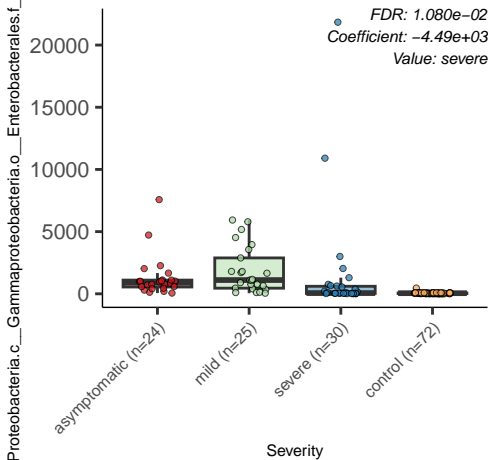

icutes.c\_\_Mollicutes.o\_\_Entomoplasmatales.f\_\_Spiroplasmataceae

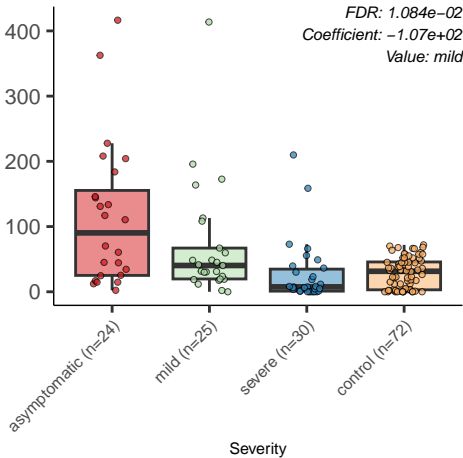

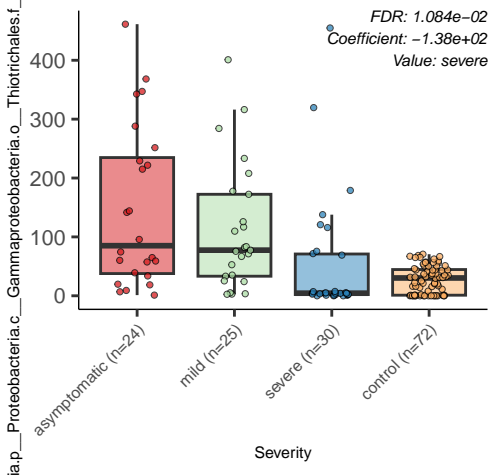

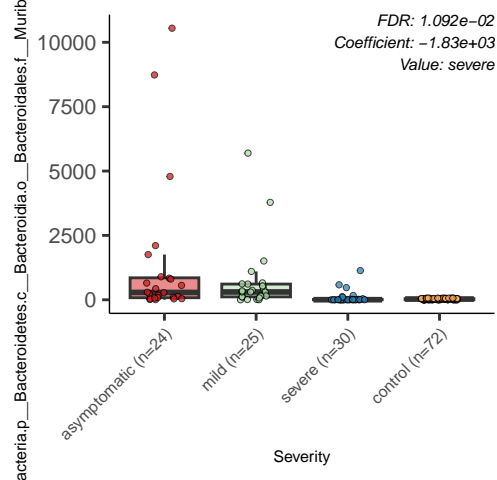

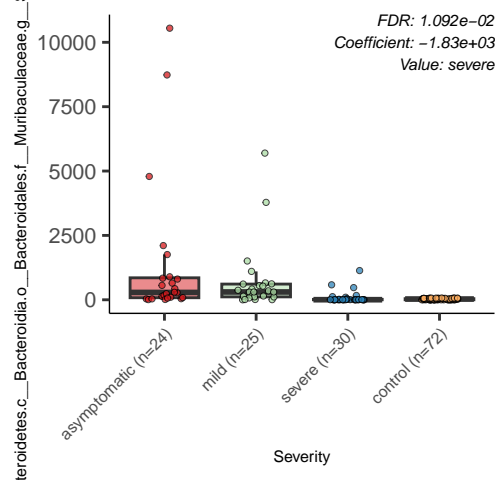



acteria.p\_\_Proteobacteria.c\_\_Alphaproteobacteria.o\_\_Rhodobacter

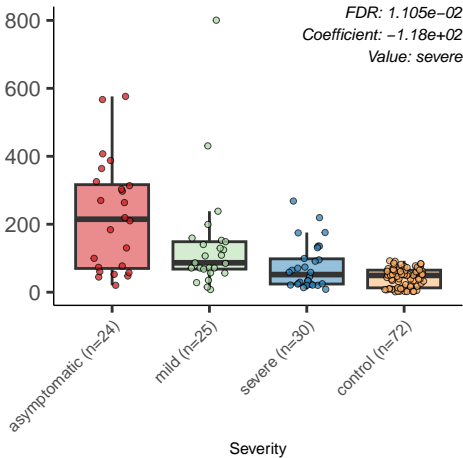

d\_Bacteria.p\_Actinobacteria.c\_Actinomycetia.o\_Corynebacteri

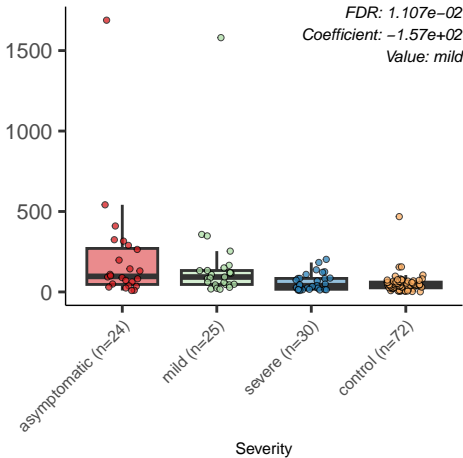

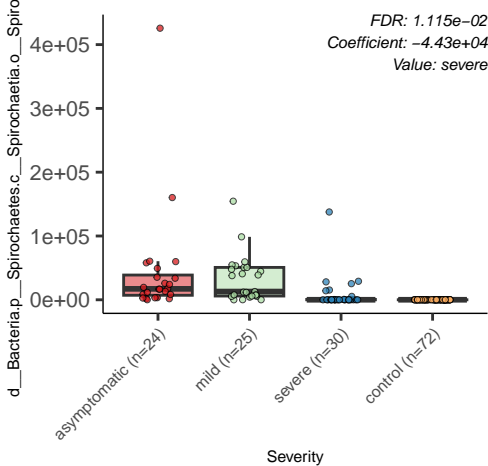

terial.c\_Actinomycetia.o\_Propionibacteriales.f\_Propionibacteriac

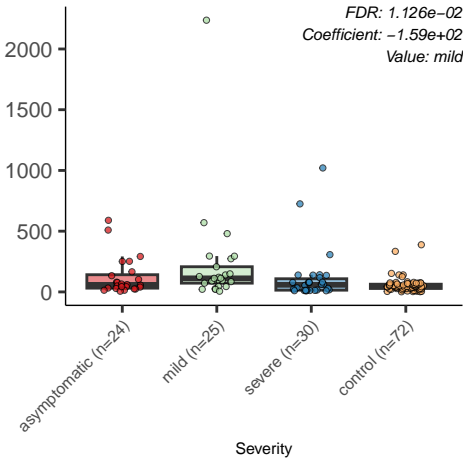

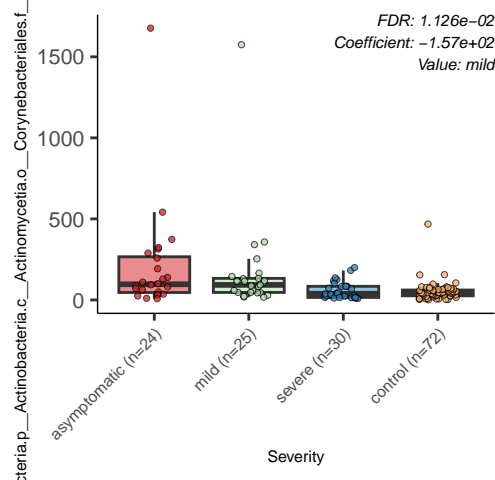

o\_Proteobacteria.c\_Gammaproteobacteria.o\_Thiotrichales.f\_Pi

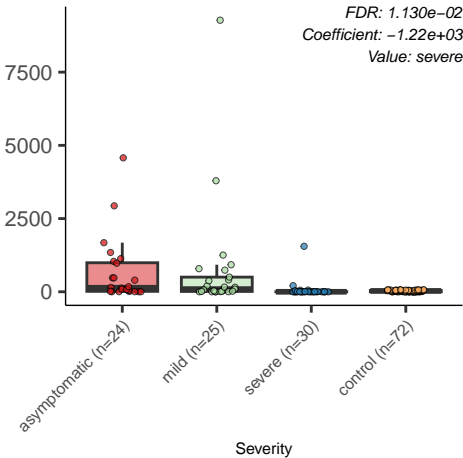

arimonadia.o\_\_Candidatus.Nanosynbacterales.f\_\_Candidatus.Nano

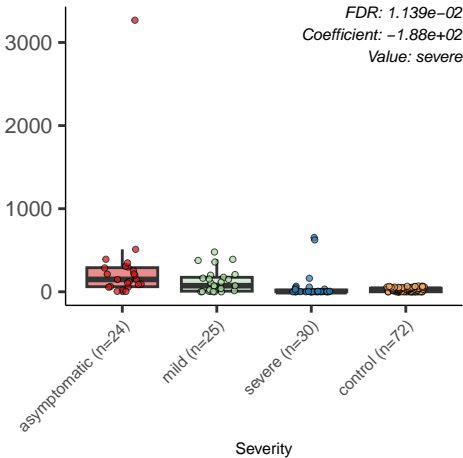

terial.c\_\_Gammaproteobacteria.o\_\_Enterobacterales.f\_\_Enterobact

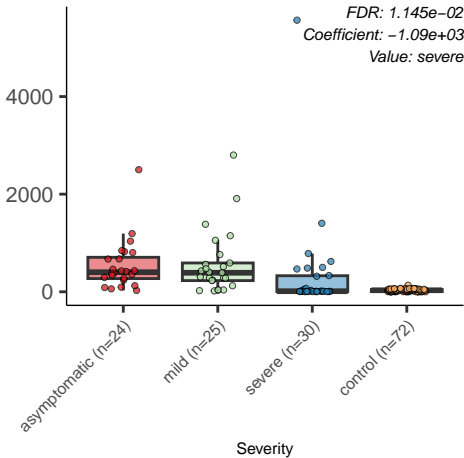



d\_Bacteria.p\_Chloroflexi.c\_Dehalococcoid

FDR:  $1.147 \times 10^{-2}$   
Coefficient:  $-1.16 \times 10^3$   
Value: severe

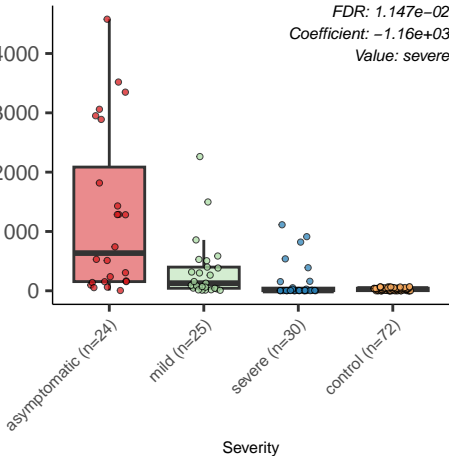

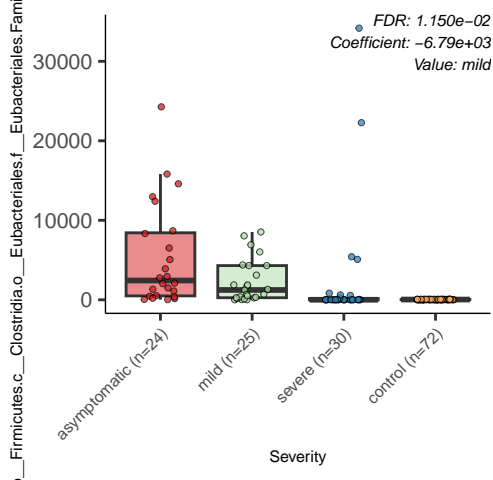

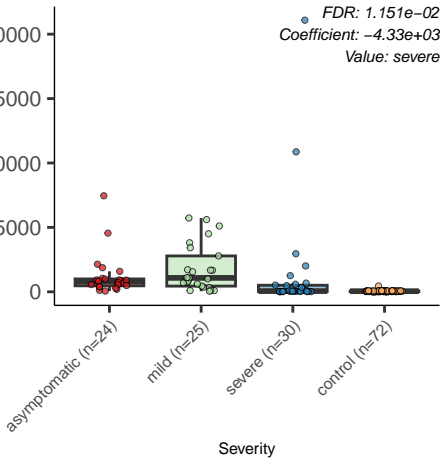

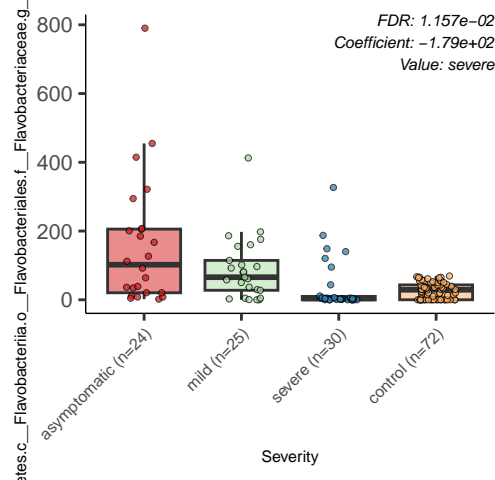

utes.c\_\_Negativicutes.o\_\_Selenomonadales.f\_\_Selenomonadaceae

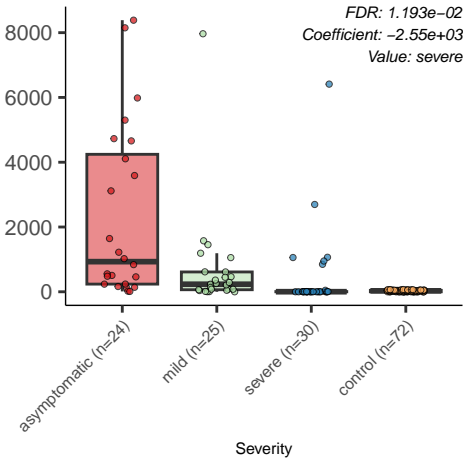

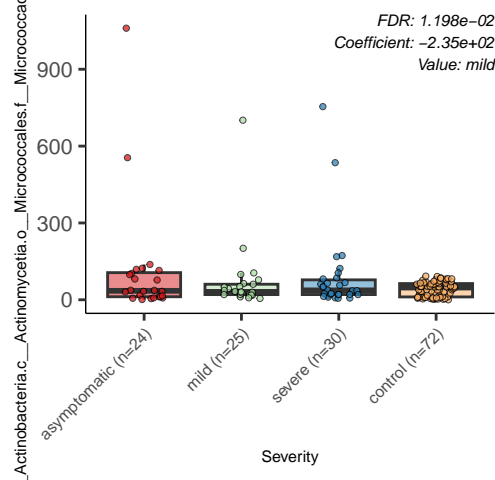

eria.p\_\_Proteobacteria.c\_\_Gammaproteobacteria.o\_\_Xanthomonas

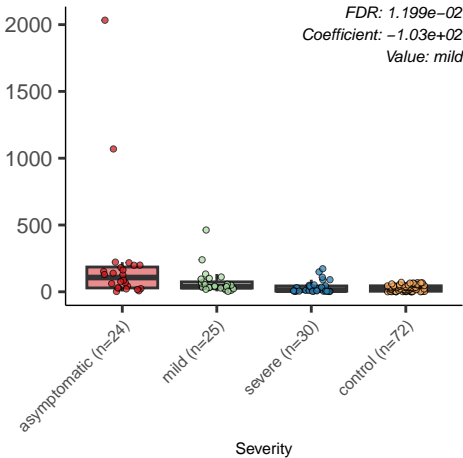

bacteria.p\_\_Proteobacteria.c\_\_Deltaproteobacteria.o\_\_Desulfuromon

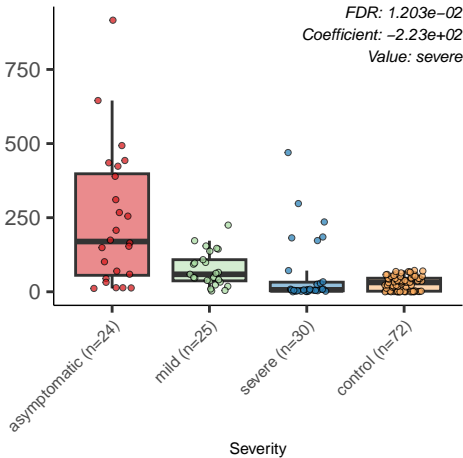



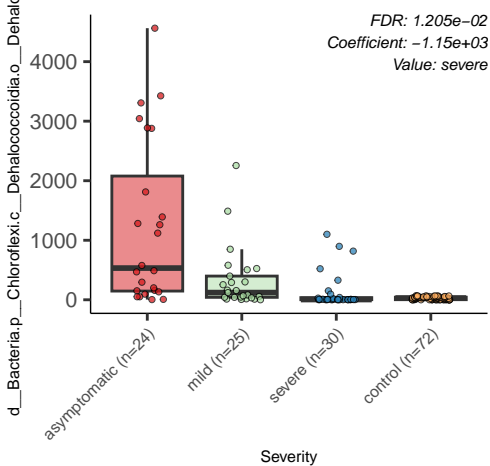

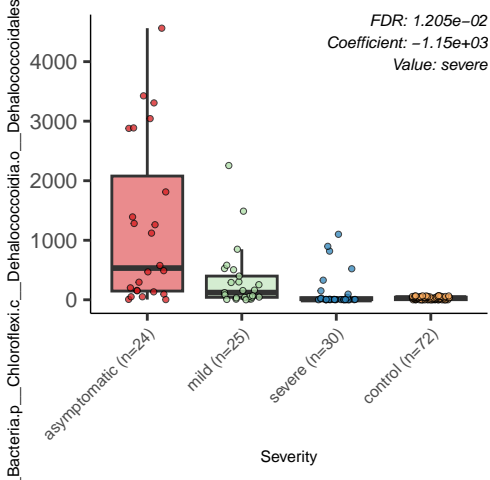

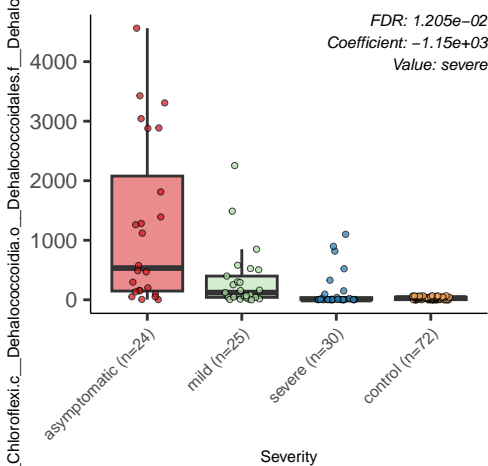

Bacteria.p\_Bacteroidetes.c\_\_Cytophagia.o\_\_Cytophagales.f\_\_Spi

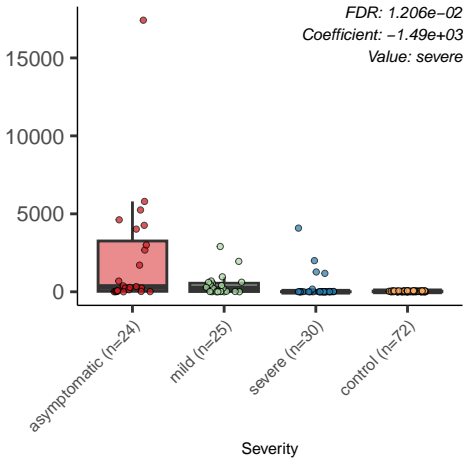

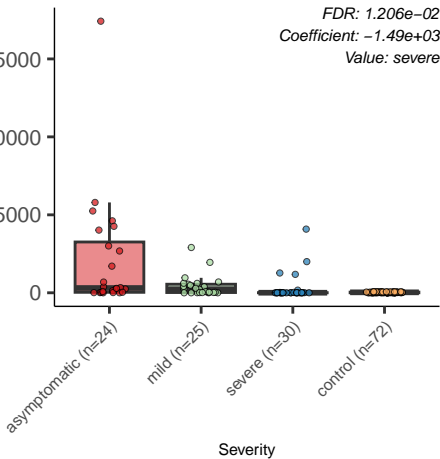

eria.c\_\_Betaproteobacteria.o\_\_Burkholderiales.f\_\_Burkholderiaceae

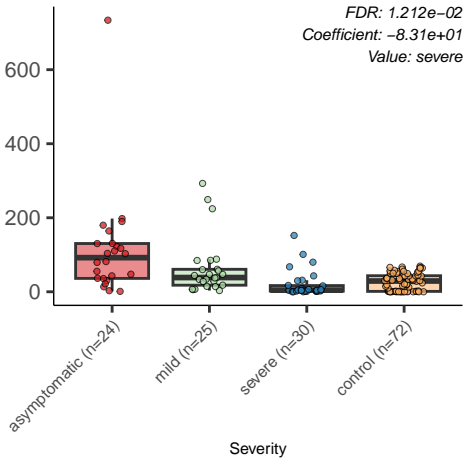

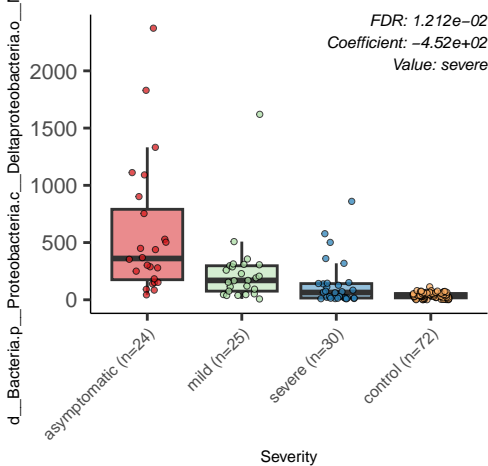

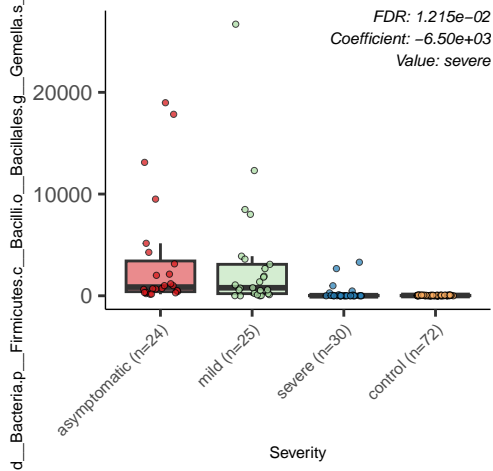



d\_Bacteria.p\_Candidatus.Saccharibacteria.g\_Candidatus

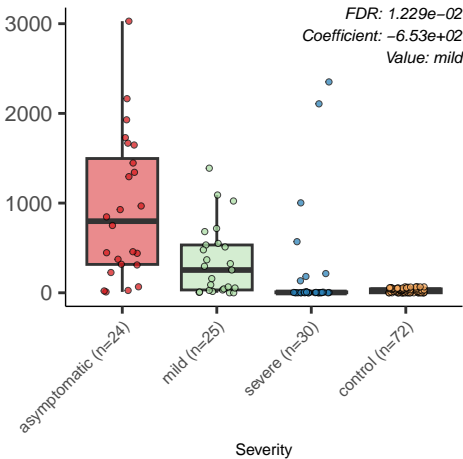

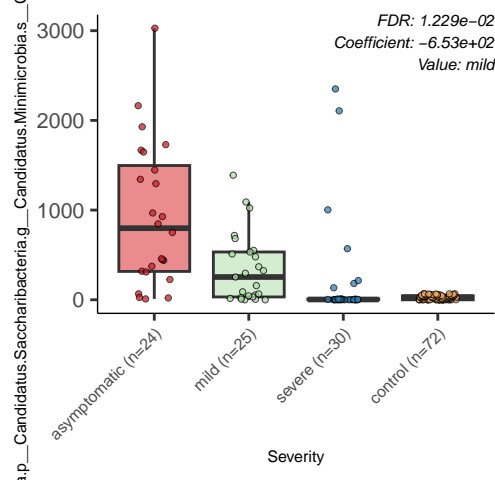

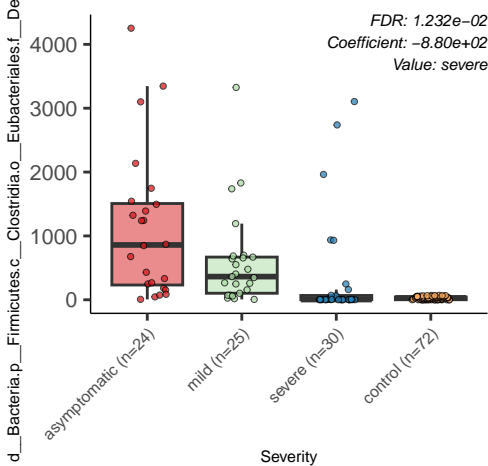

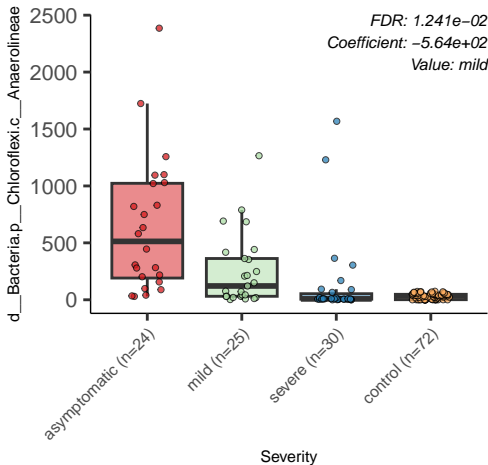

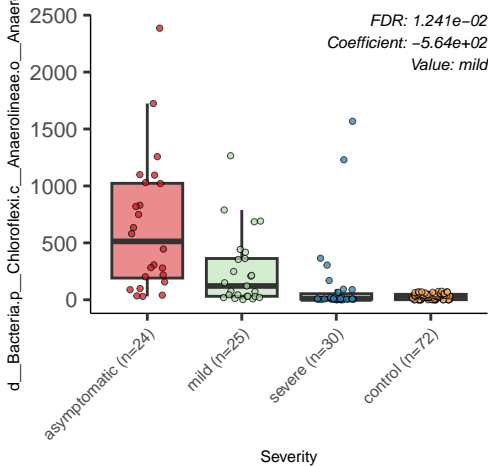

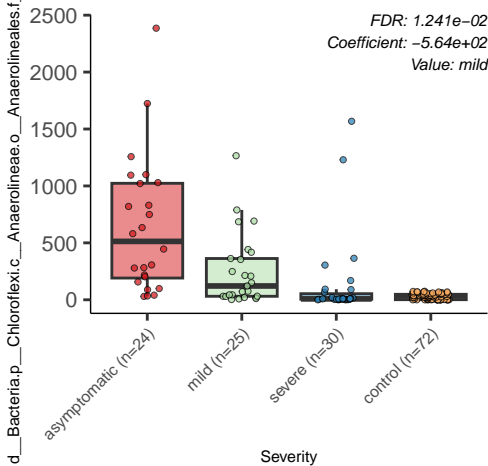

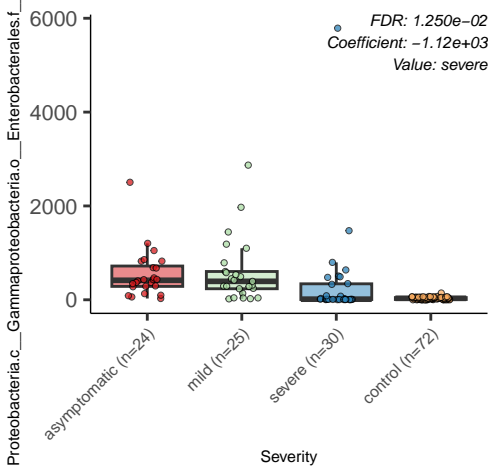

:\_Gamma proteobacteria.o\_\_Pseudomonadales.f\_\_Pseudomonadales

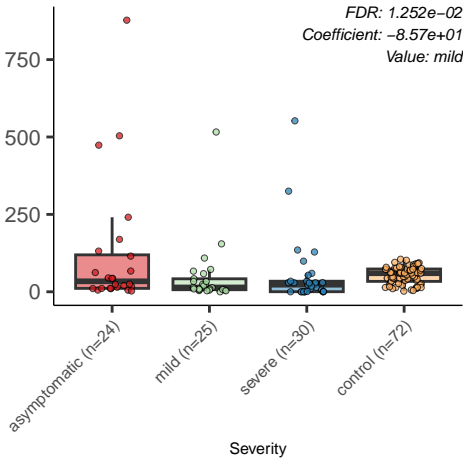



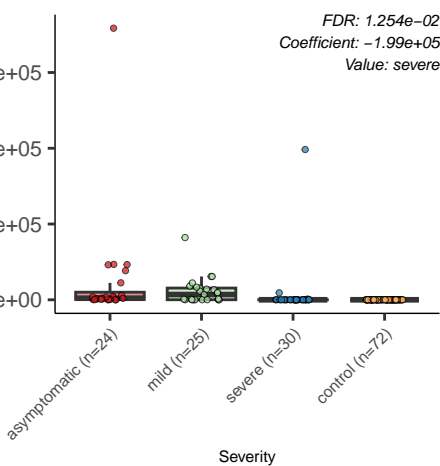

a.p\_Actinobacteria.c\_Actinomycetia.o\_Streptomycetales.f\_Stre

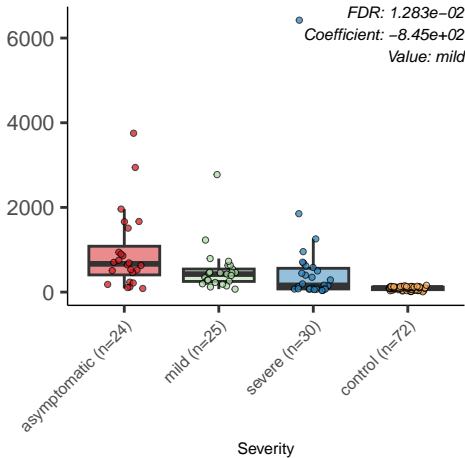

Bacteroidetes.c\_Bacteroidia.o\_Bacteroidales.f\_Bacteroidaceae.g

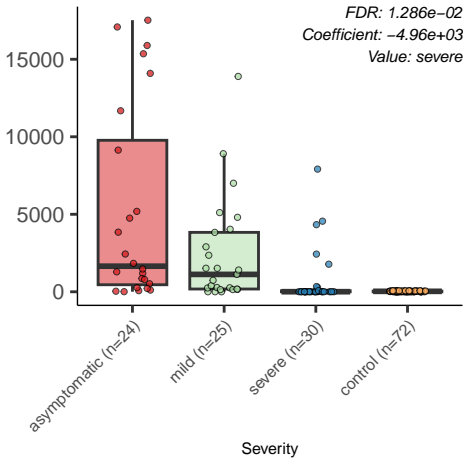

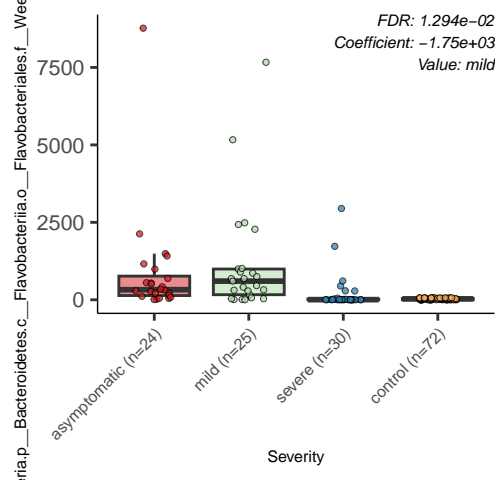

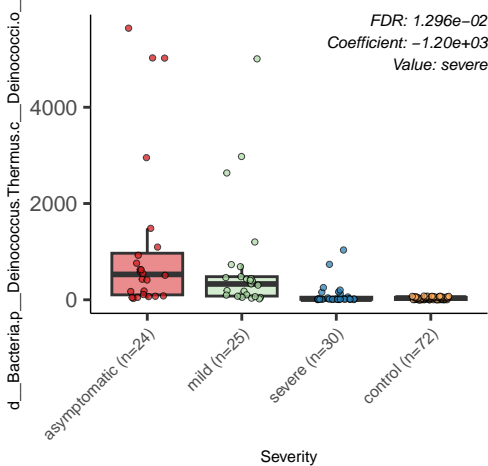

d\_Bacteria.p\_Deinococcus.Thermus.c\_Deinococci.o\_Therma

FDR:  $1.296e-02$   
Coefficient:  $-1.20e+03$   
Value: severe

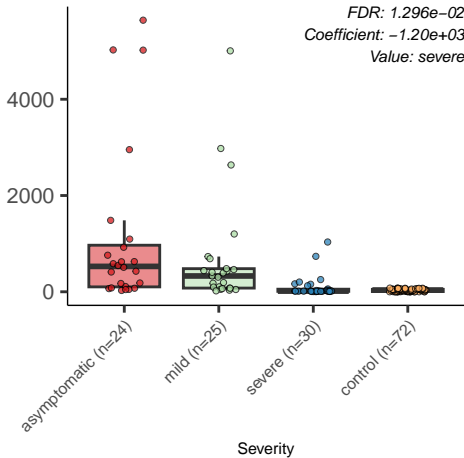

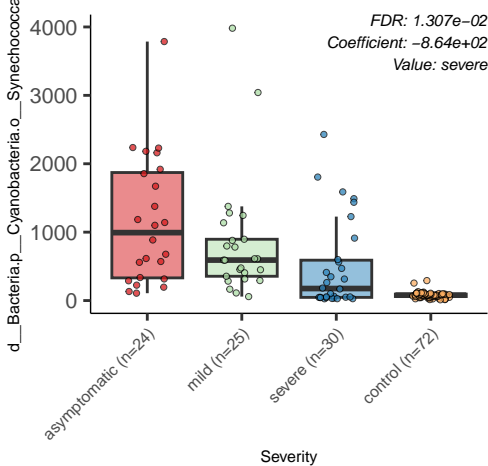

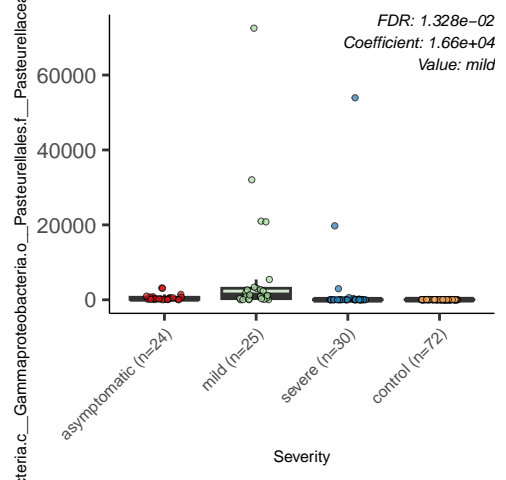



d\_\_Bacteria.p\_\_Planctomycetes.c\_\_Planctomycetia.o\_\_Pirellula

FDR:  $1.340e-02$   
Coefficient:  $-6.62e+02$   
Value: severe

4000

2000

0

asymptomatic (n=24)

mild (n=25)

severe (n=30)

control (n=72)

Severity

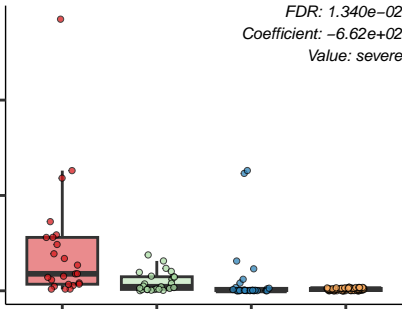

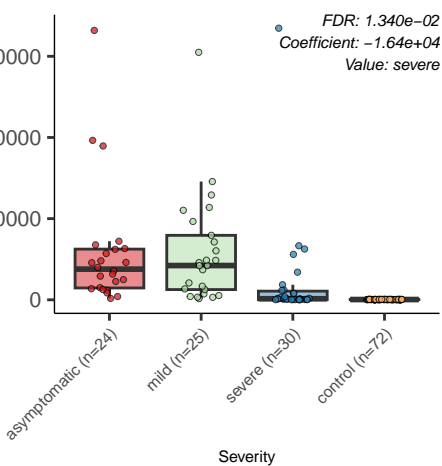

Bacteria.p\_\_Firmicutes.c\_\_Tissierellia.o\_\_Tissierellales.f\_\_Peptonip

FDR:  $1.353e-02$   
Coefficient:  $-1.02e+03$   
Value: mild

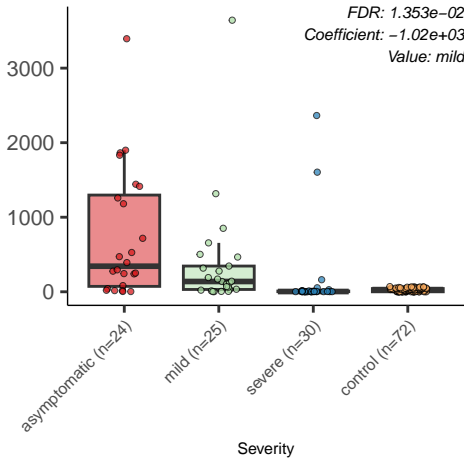

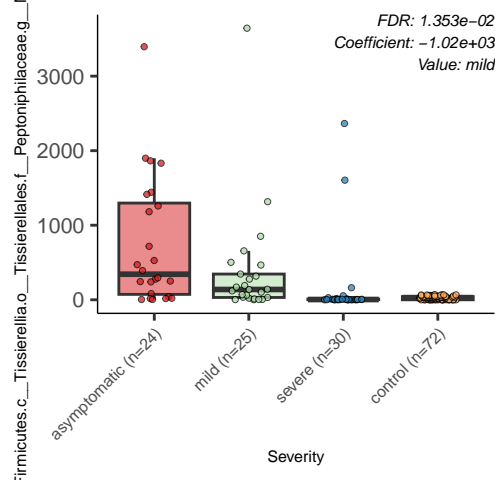

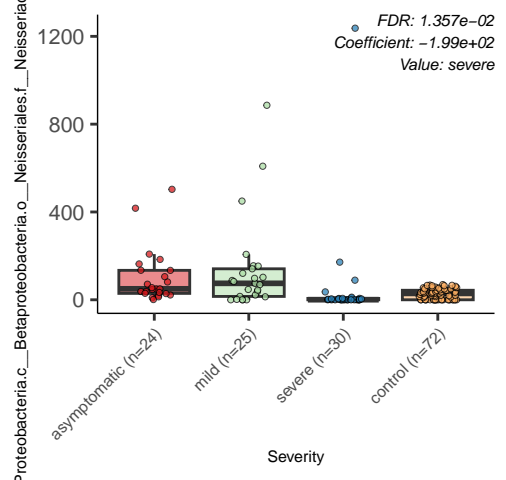

bacteria.c\_\_Gammaproteobacteria.o\_\_Alteromonadales.f\_\_Shewanella

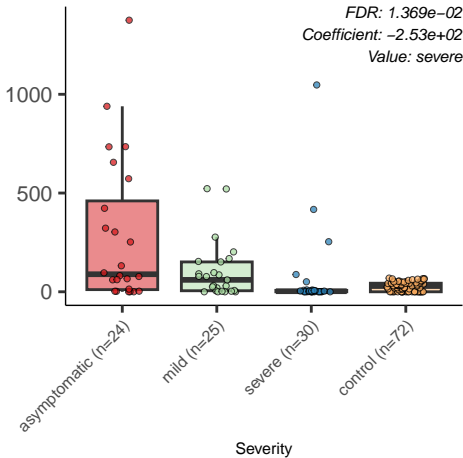

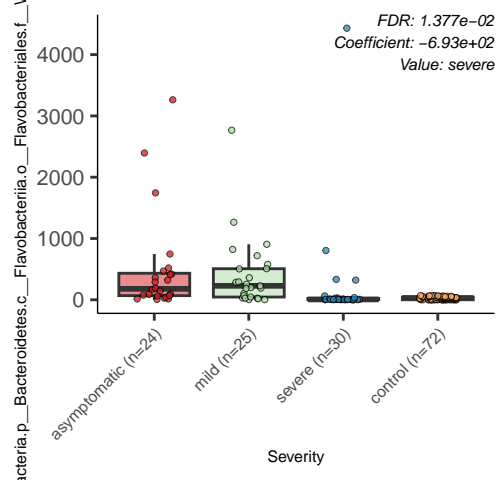

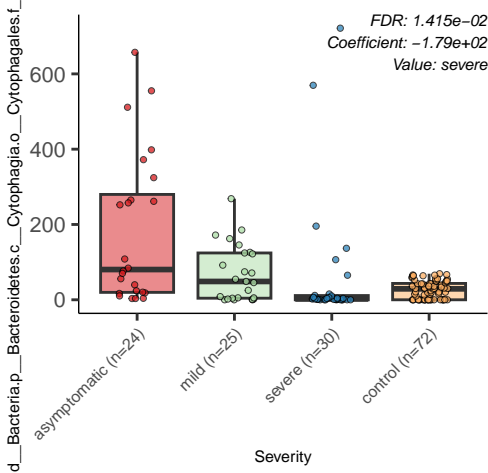



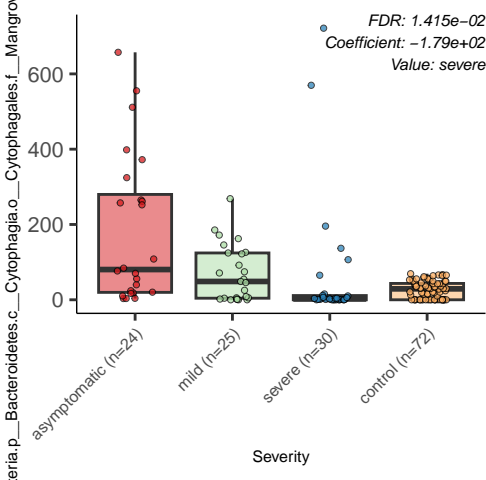

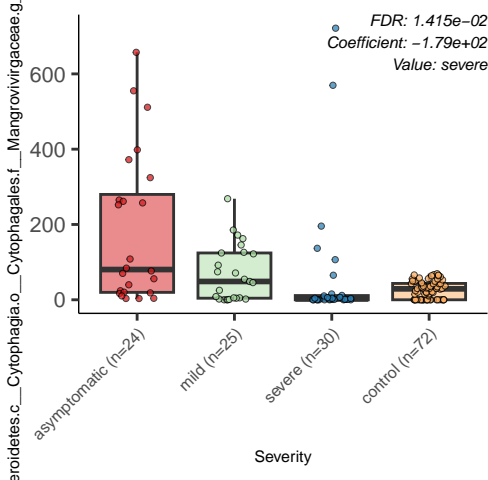

a.p\_\_Actinobacteria.c\_\_Actinomycetia.o\_\_Propionibacteriales.f\_\_Pr

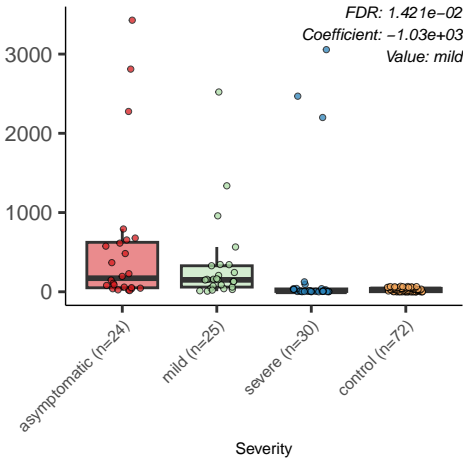

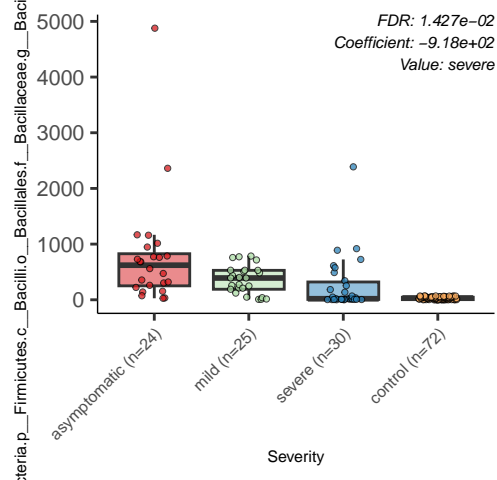

ria.p\_\_Bacteroidetes.c\_\_Flavobacteriia.o\_\_Flavobacteriales.f\_\_Wee

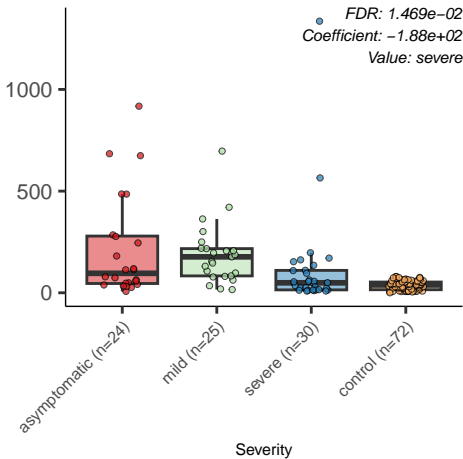

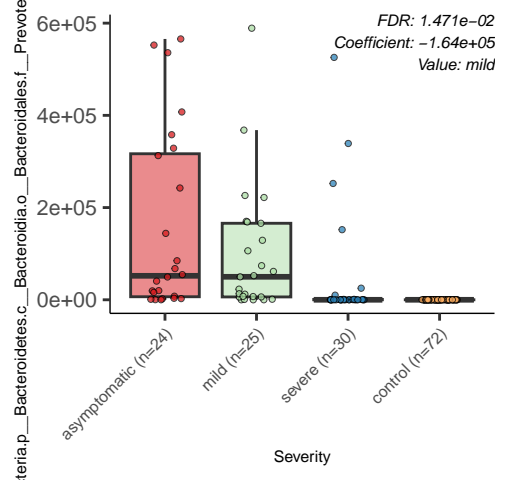

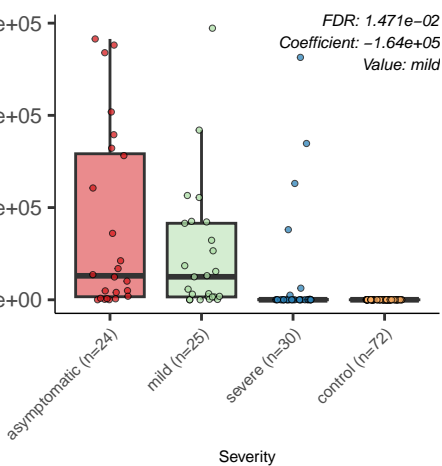

bacteria.p\_\_Firmicutes.c\_\_Clostridia.o\_\_Eubacteriales.f\_\_Peptococcae

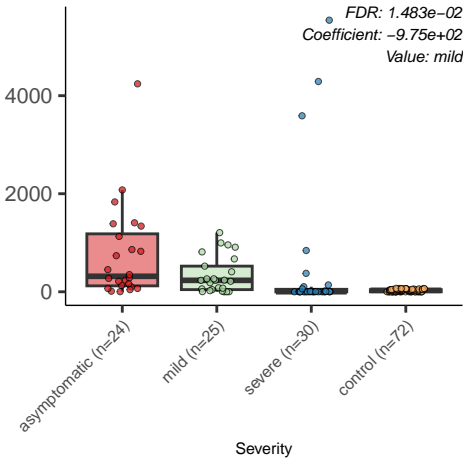



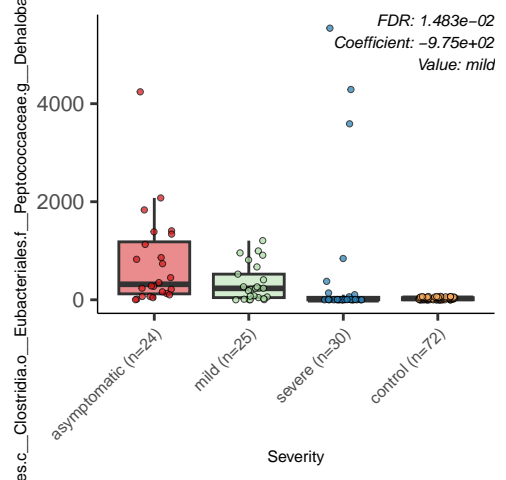

teobacteria.c\_\_Alphaproteobacteria.o\_\_Hyphomicrobiales.f\_\_Met

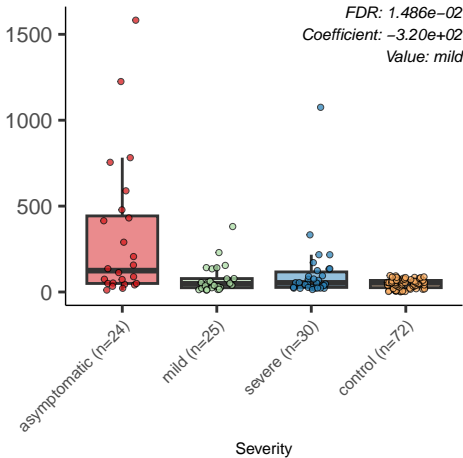

Bacteroidetes.c\_\_Bacteroidia.o\_\_Bacteroidales.f\_\_Prevotellaceae.g

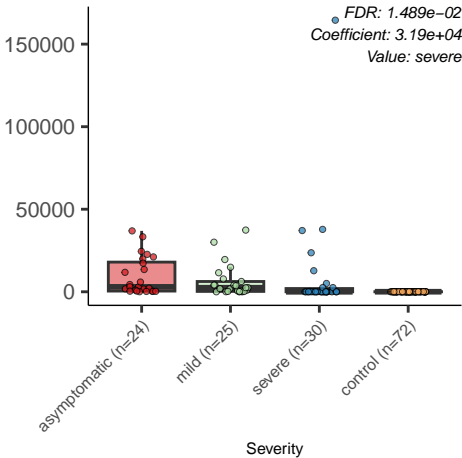

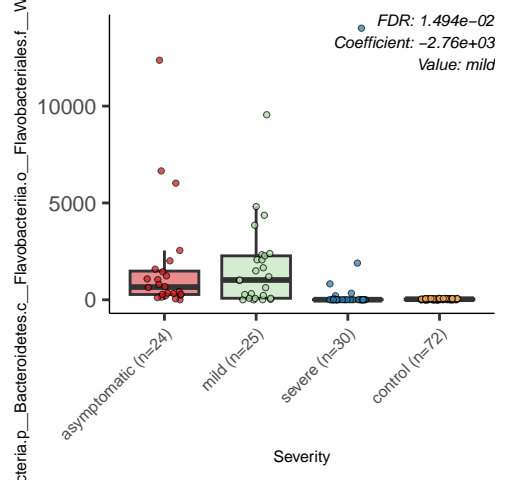

acteroidetes.c\_Flavobacteriia.o\_Flavobacteriales.f\_Weeksellaceae

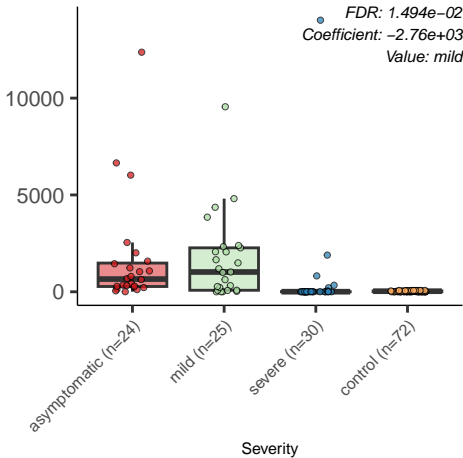

*FDR: 1.502e-02*  
*Coefficient: 5.71e+02*  
*Value: severe*

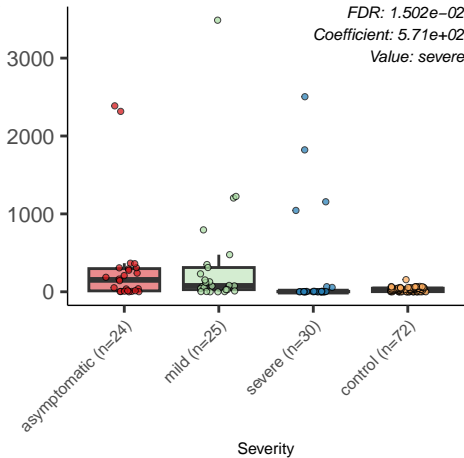

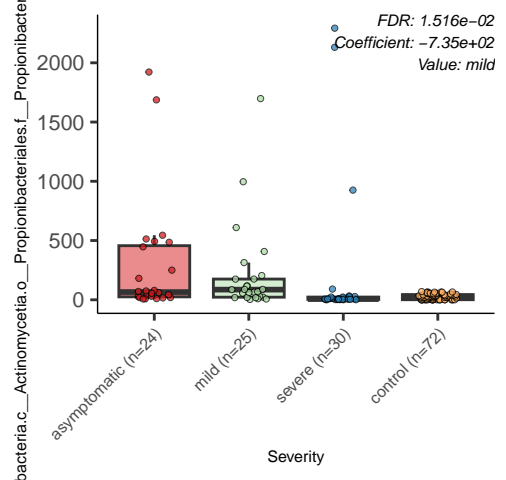

d\_Bacteria.p\_Actinobacteria.c\_Actinomycetia.o\_Strep

FDR: 1.518e-02  
Coefficient: -9.99e+02  
Value: mild

10000

5000

0

asymptomatic (n=24)

mild (n=25)

severe (n=30)

control (n=72)

Severity

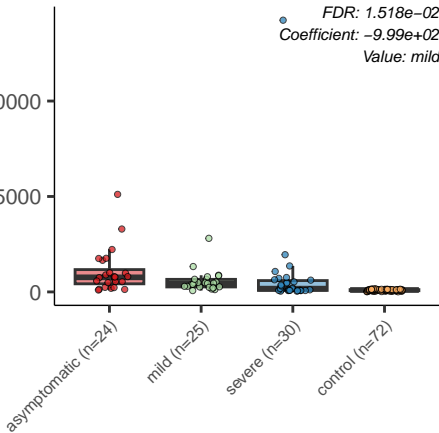



Bacteria.p\_Actinobacteria.c\_Actinomycetia.o\_Streptomycetale

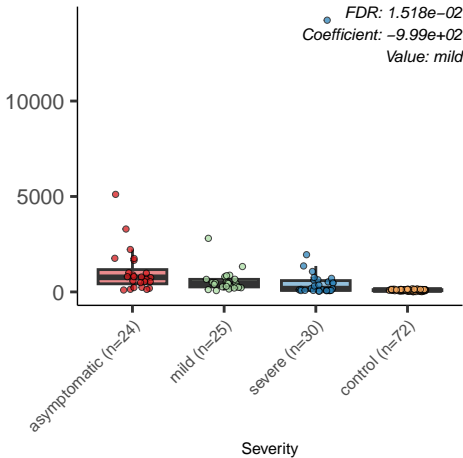

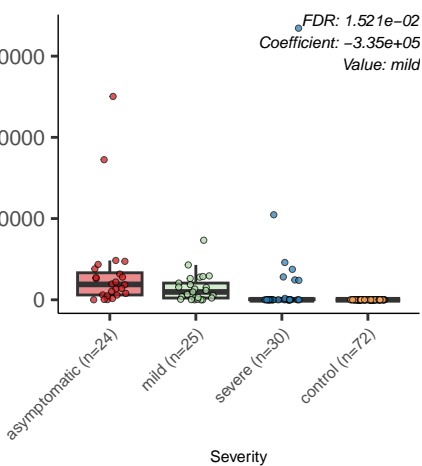

icutes.c\_\_Bacilli.o\_\_Lactobacillales.f\_\_Enterococcaceae.g\_\_Tetrag

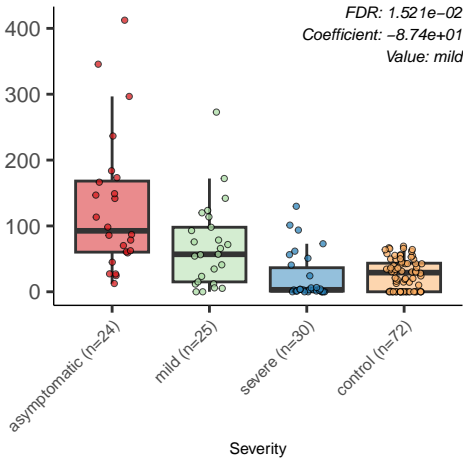

Clostridia.o\_Thermoanaerobacterales.f\_Thermoanaerobacterales.

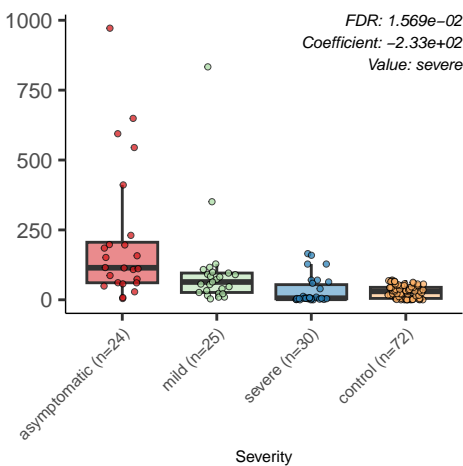

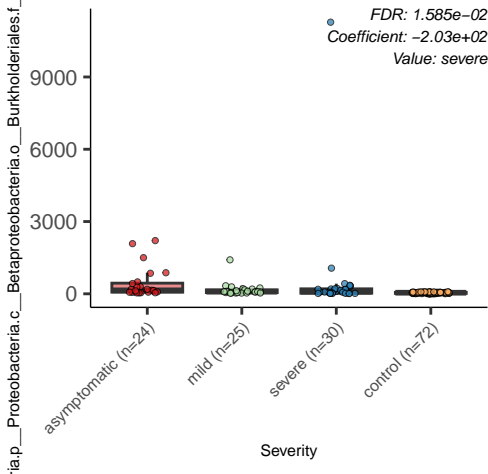

ia.p\_Actinobacteria.c\_Actinomycetia.o\_Micrococcales.f\_Microb

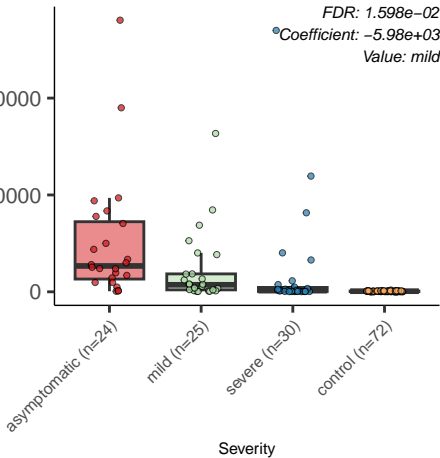

chaetes.c\_\_Spirochaetia.o\_\_Spirochaetales.f\_\_Treponemataceae.g

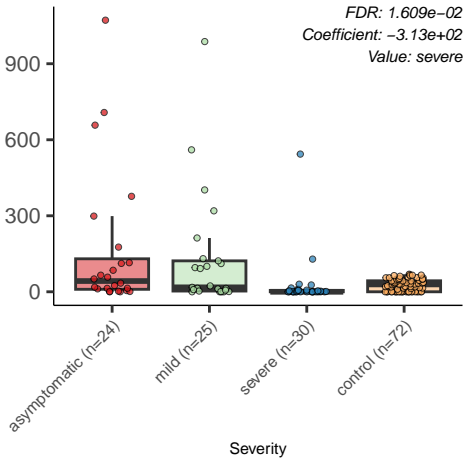

d\_Bacteria.p\_\_Chloroflexi

FDR:  $1.628e-02$   
Coefficient:  $-1.53e+03$   
Value: mild

asymptomatic (n=24)

mild (n=25)

severe (n=30)

control (n=72)

Severity

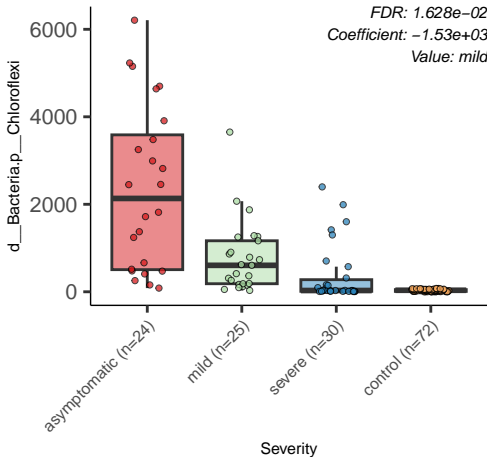



teria.p\_\_Proteobacteria.c\_\_Alphaproteobacteria.o\_\_Hyphomicrobia

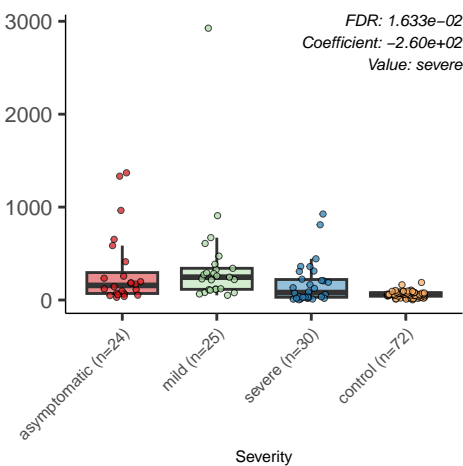

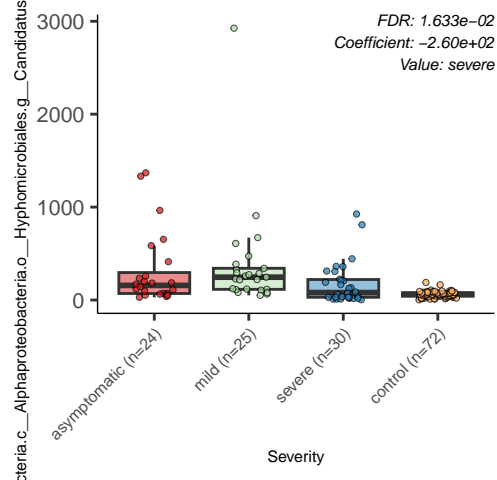

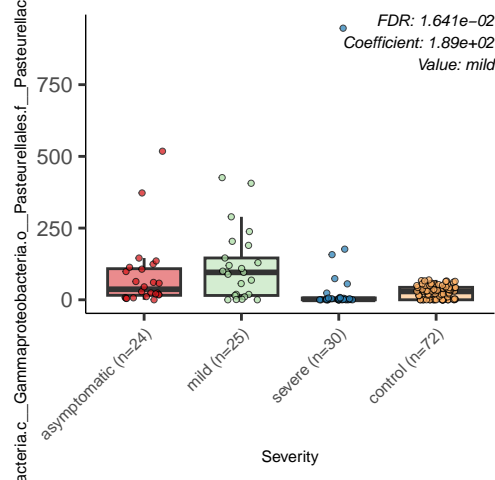

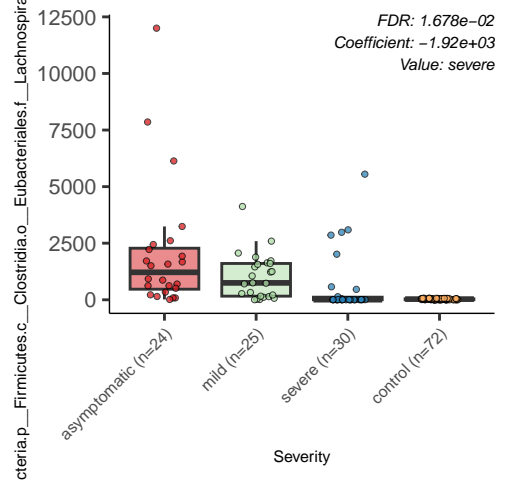

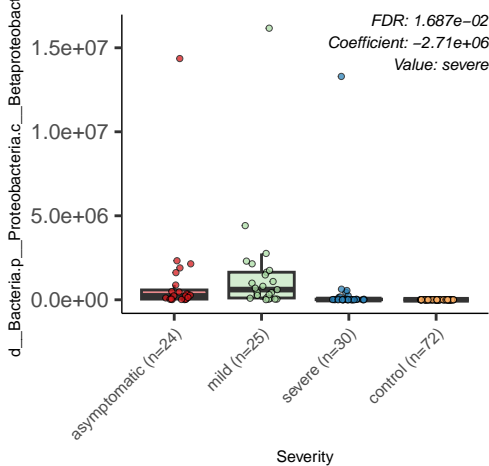

eria.c\_Actinomycetia.o\_Bifidobacteriales.f\_Bifidobacteriaceae.g

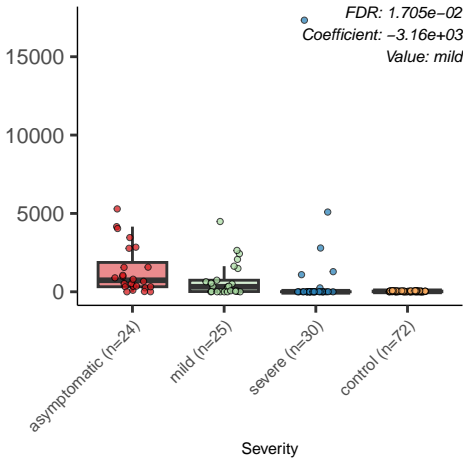

d\_Bacteria.p\_Bacteroidetes.c\_Cytophagia.o\_Cytophagales.

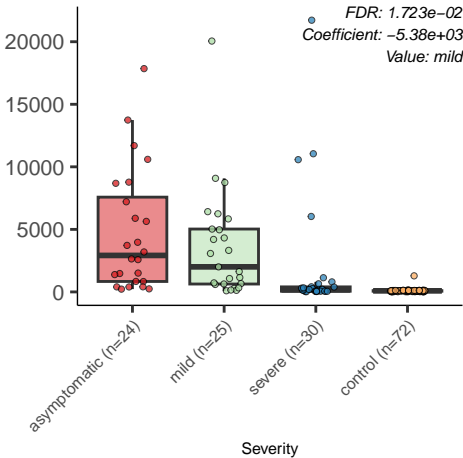

d\_Bacteria.p\_Fusobacteria

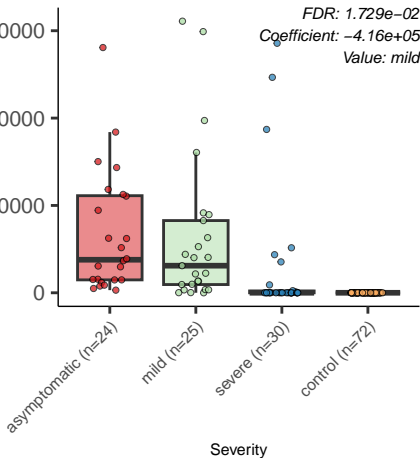



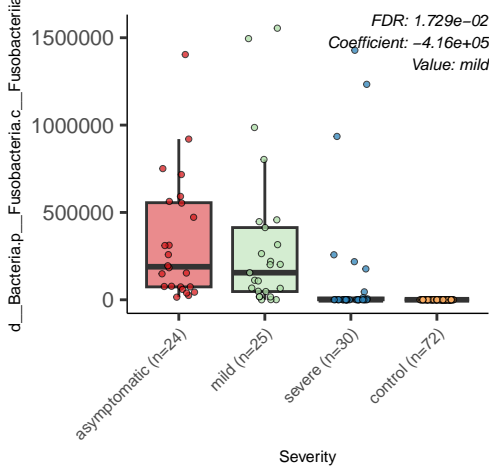

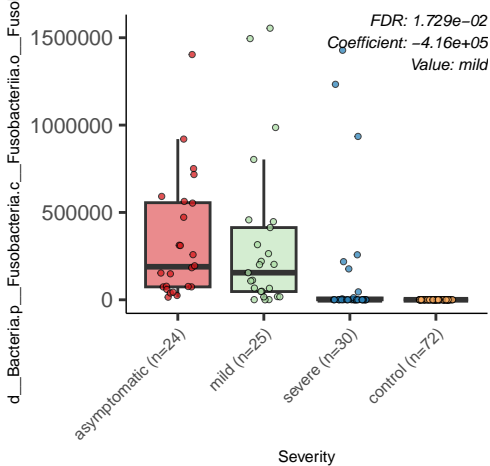

bacteria.p\_\_Proteobacteria.c\_\_Alphaproteobacteria.o\_\_Sphingomonas

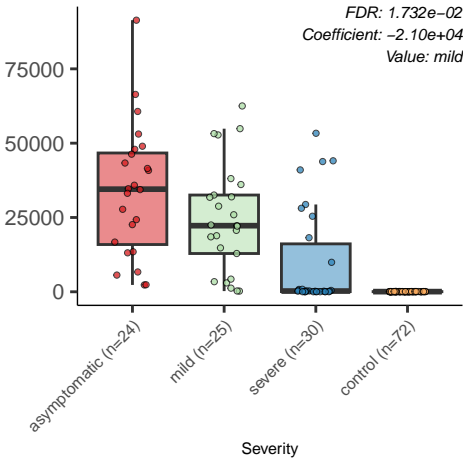

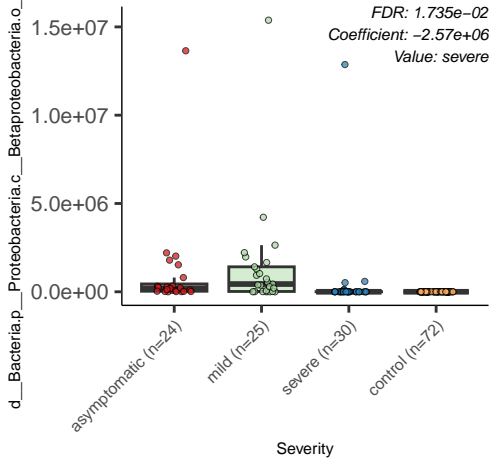

d\_\_Bacteria.p\_\_Spirochaetes.c\_\_Spirochaetia.o\_\_Spirochaetales.f\_\_

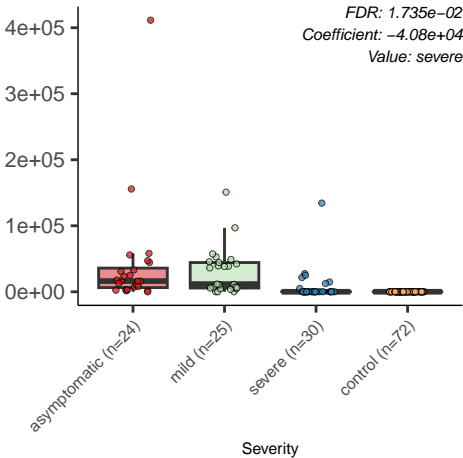

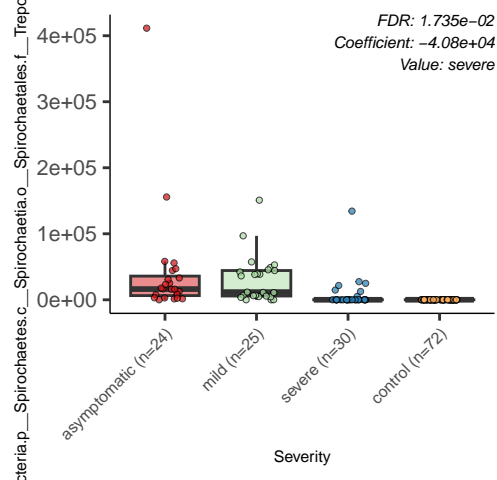

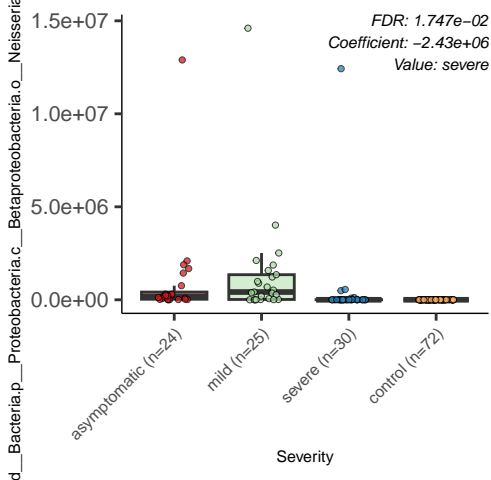

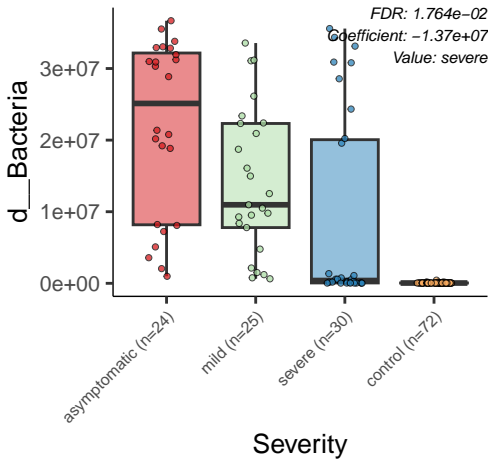



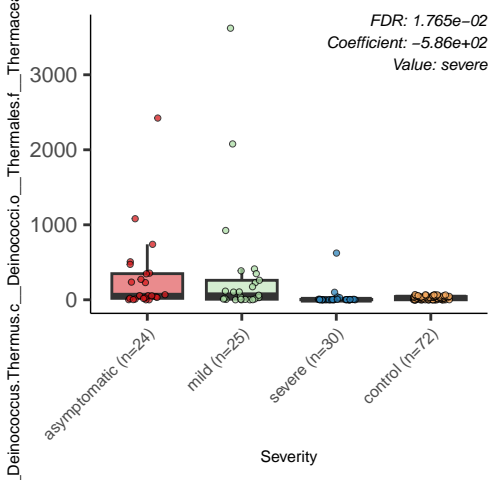

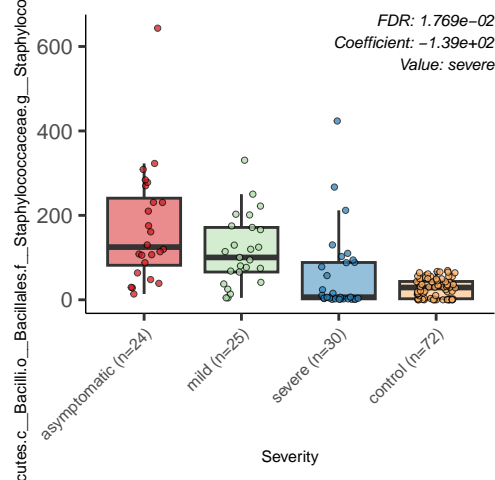

ria.p\_\_Tenericutes.c\_\_Mollicutes.o\_\_Acholeplasmatales.f\_\_Acholeplasma

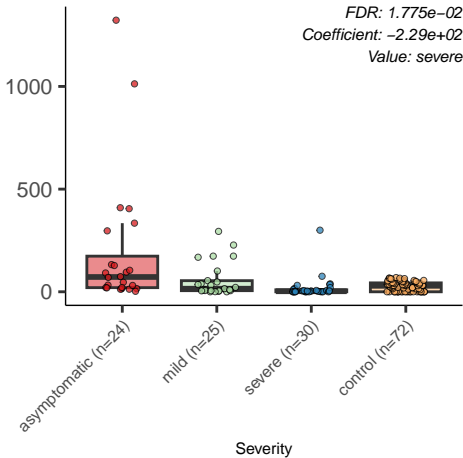

ites.c\_\_Mollicutes.o\_\_Acholeplasmatales.f\_\_Acholeplasmataceae.g

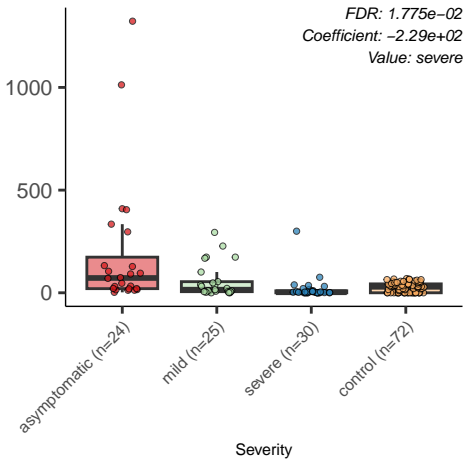

cteria.p\_\_Proteobacteria.c\_\_Gammaproteobacteria.o\_\_Oceanospir

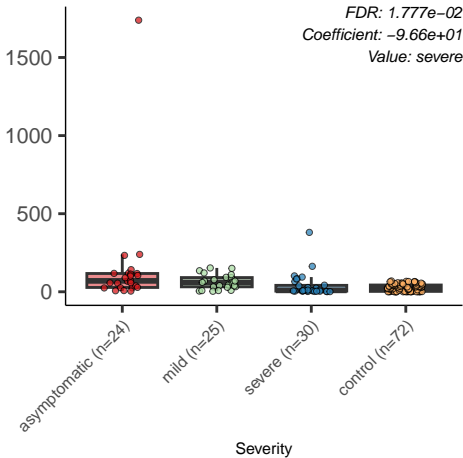

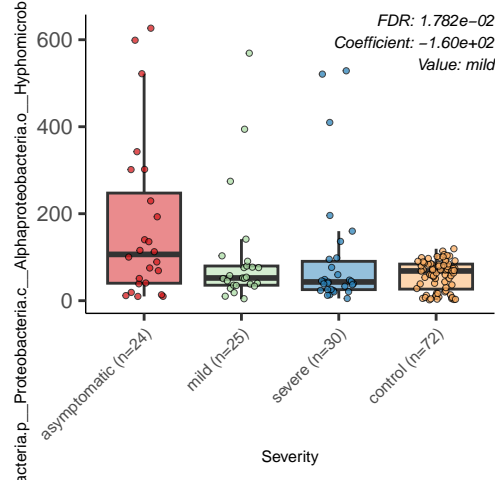

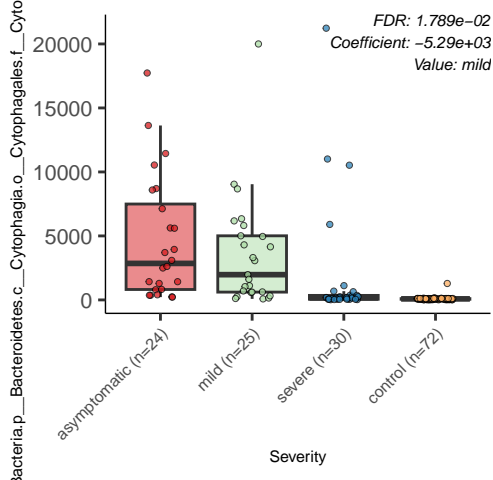

Firmicutes.c\_\_Clostridia.o\_\_Eubacteriales.f\_\_Oscillospiraceae.g

*FDR: 1.793e-02*  
*Coefficient: -6.33e+02*  
*Value: severe*

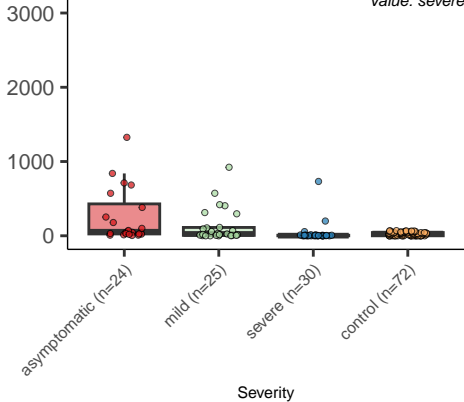



firmicutes.c\_\_Bacilli.o\_\_Lactobacillales.f\_\_Streptococcaceae.g\_\_Str

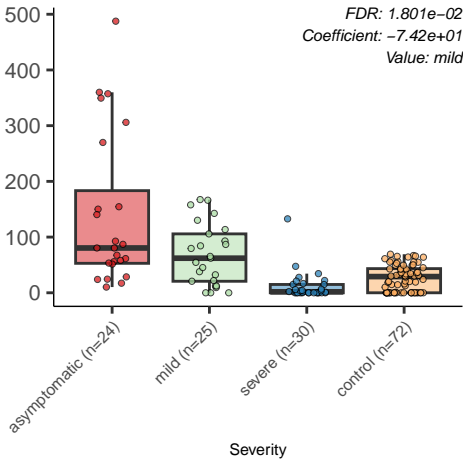

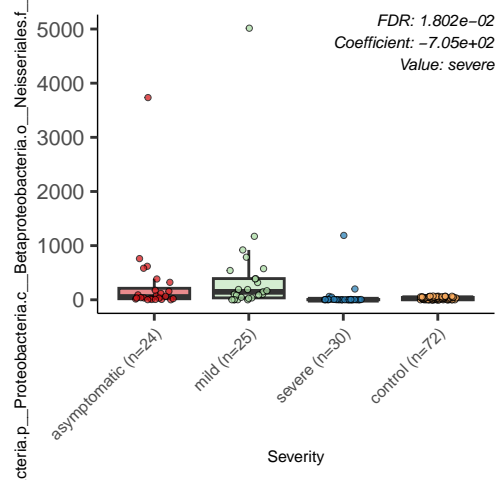

d\_Bacteria.p\_\_Proteobacteria.c\_\_Gammaproteobacteria.o\_\_

FDR:  $1.814 \times 10^{-2}$   
Coefficient:  $-1.20 \times 10^4$   
Value: severe

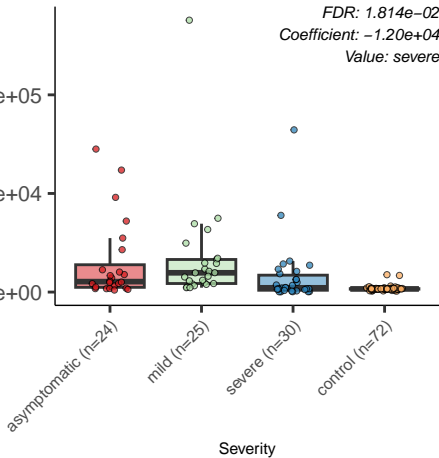

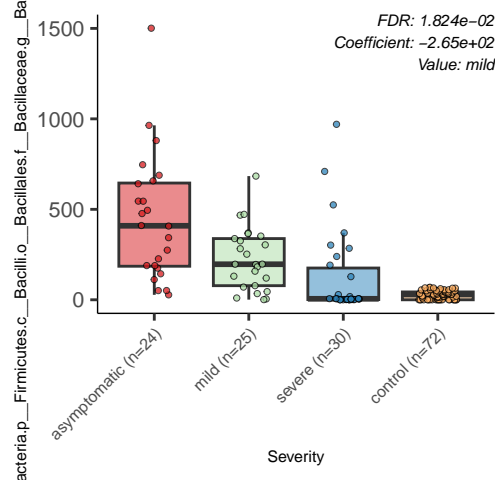

proteobacteria.c\_\_Alphaproteobacteria.o\_\_Hyphomicrobiales.f\_\_Met

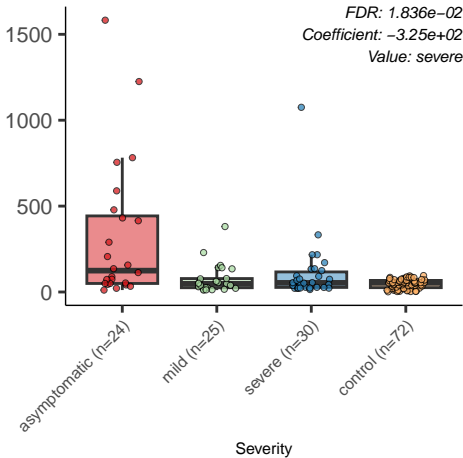

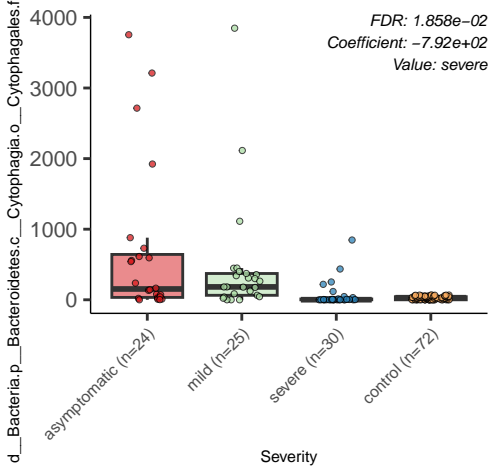

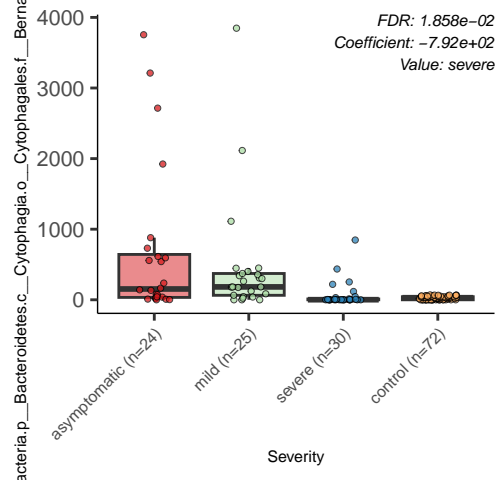

Bacteroidetes.c\_\_Cytophagia.o\_\_Cytophagales.f\_\_Bernardetiaceae.

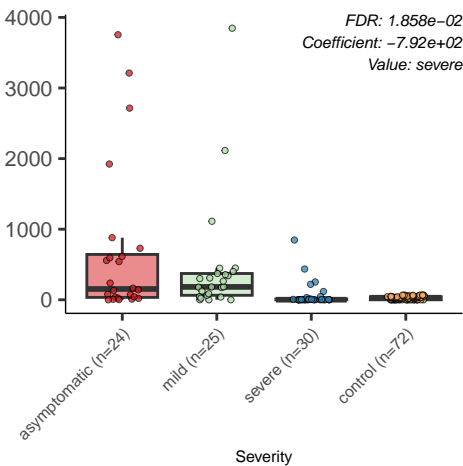



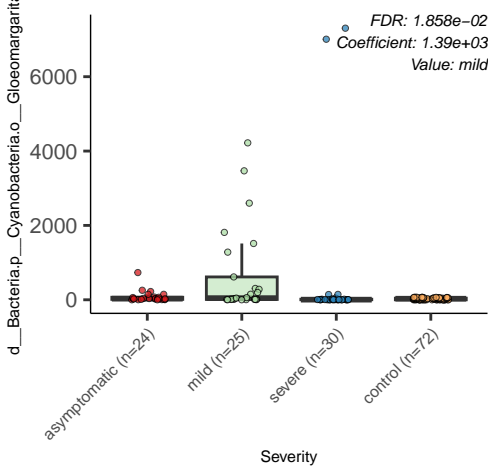

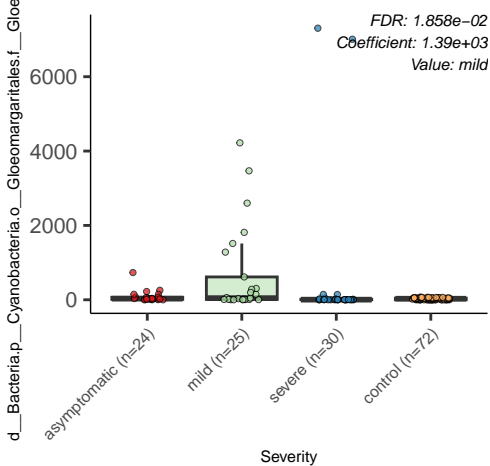

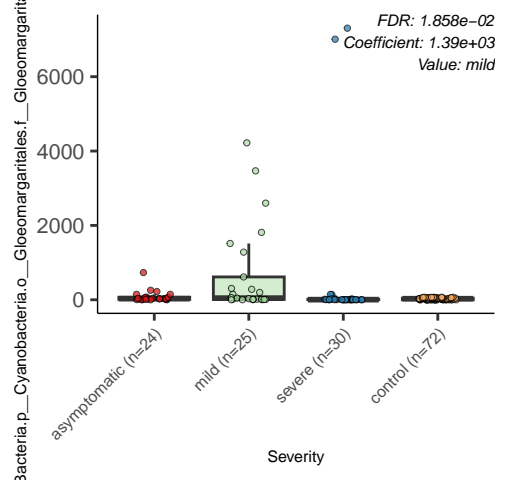

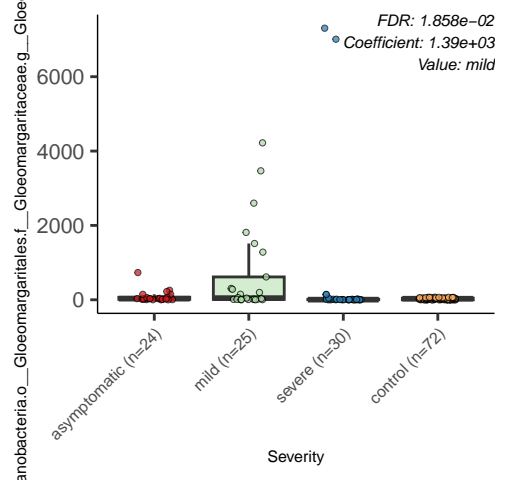

rochaetes.c\_\_Spirochaetia.o\_\_Spirochaetales.f\_\_Treponemataceae

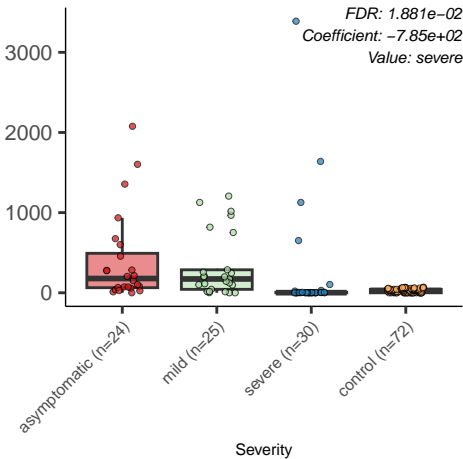

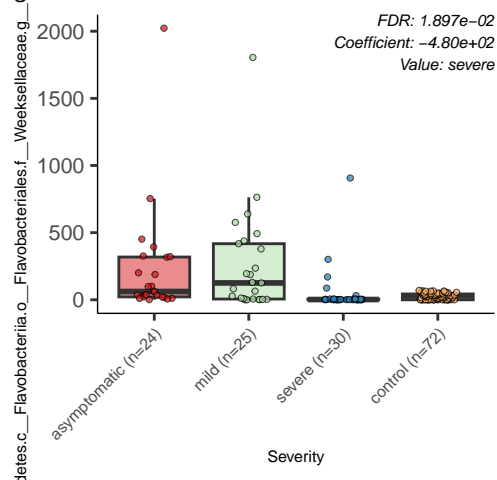

sobacteria.c\_\_Fusobacteriia.o\_\_Fusobacteriales.f\_\_Leptotrichiaceae

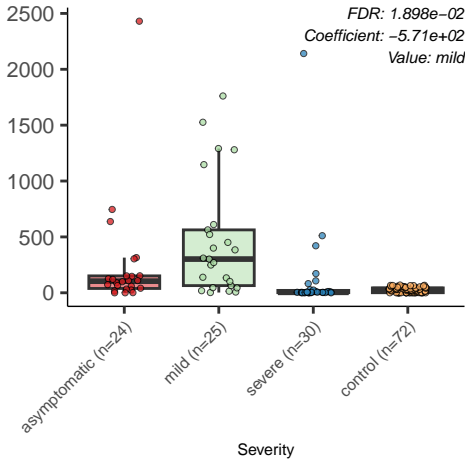

d\_\_Bacteria.p\_\_Bacteroidetes.c\_\_Bacteroidia.o\_\_Bacteroidales.f\_\_

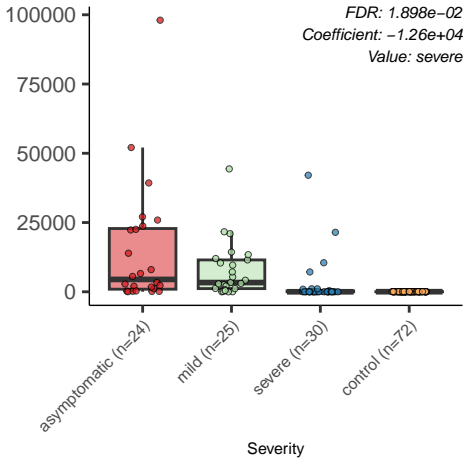



Proteobacteria.c\_\_Alphaproteobacteria.o\_\_Hyphomicrobiales.f\_\_X

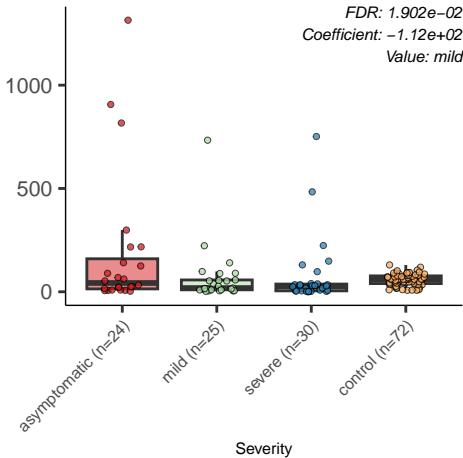

a.c\_\_Alphaproteobacteria.o\_\_Hyphomicrobiales.f\_\_Xanthobacteraceae

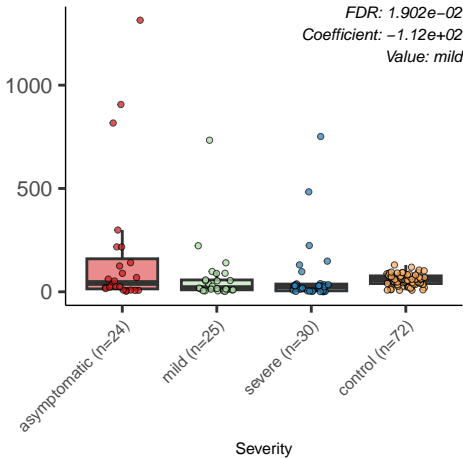

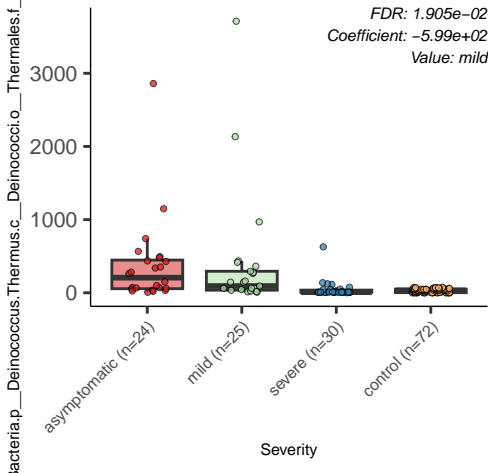

Bacteria.p\_Firmicutes.c\_Bacilli.o\_Bacillales.f\_Bacillaceae.g\_B

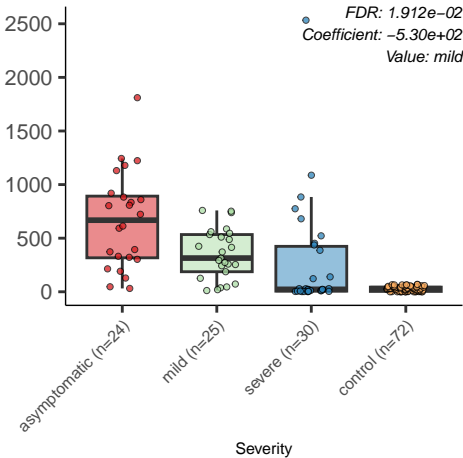

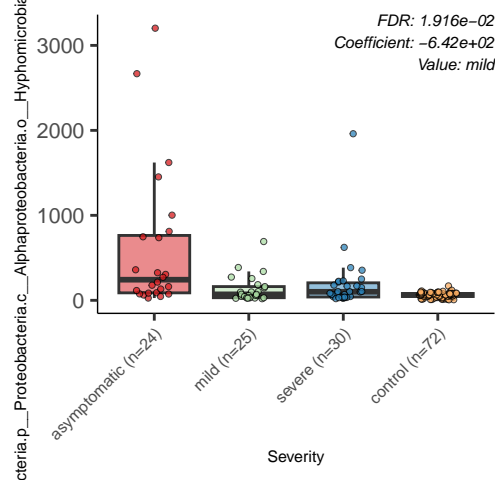

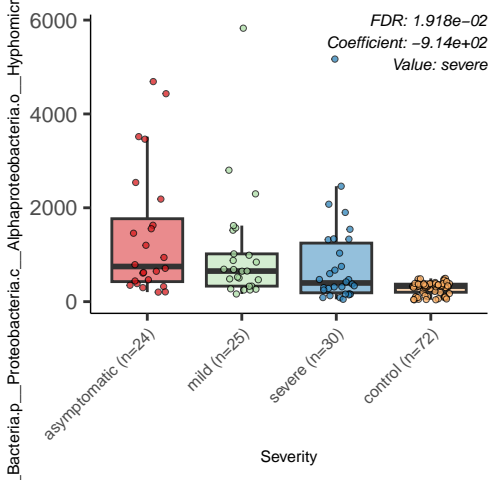

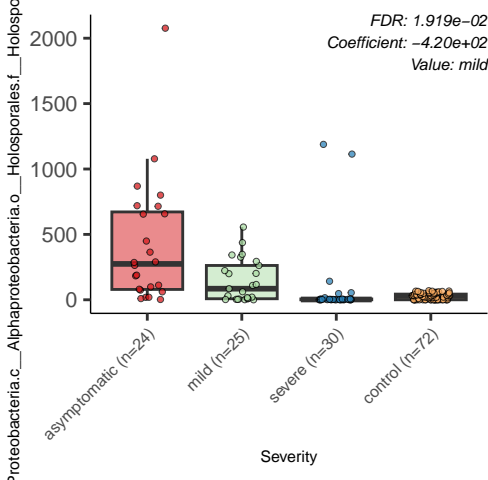

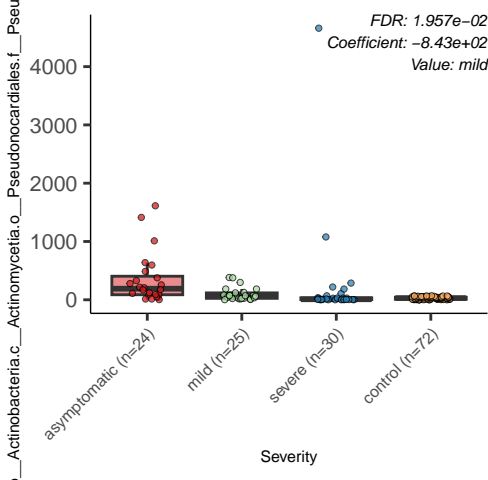



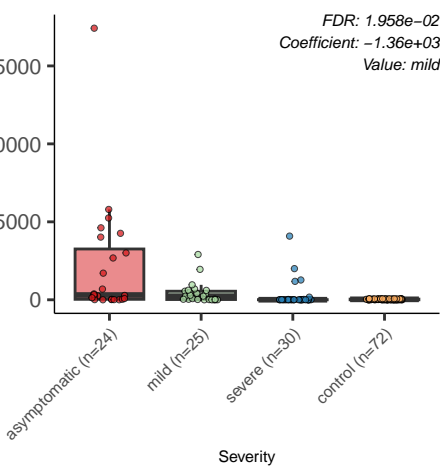

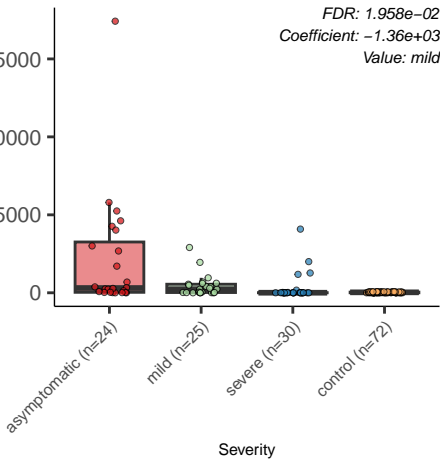

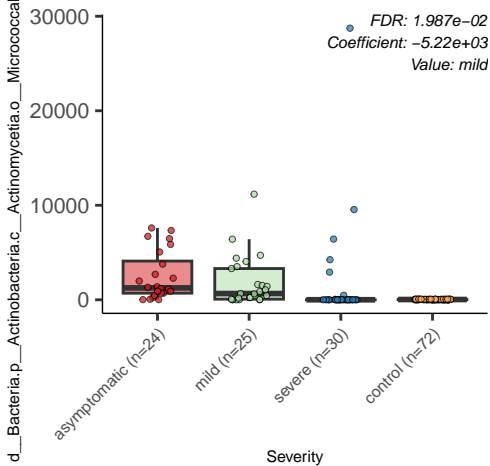

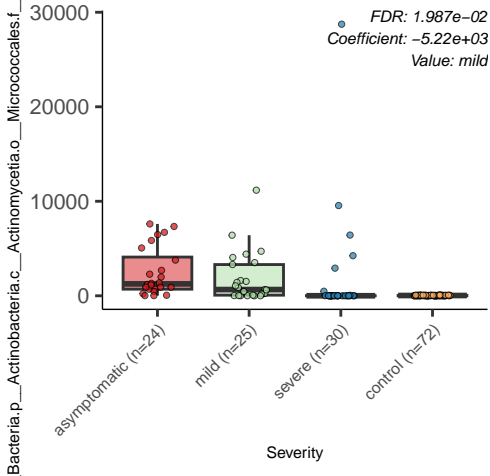

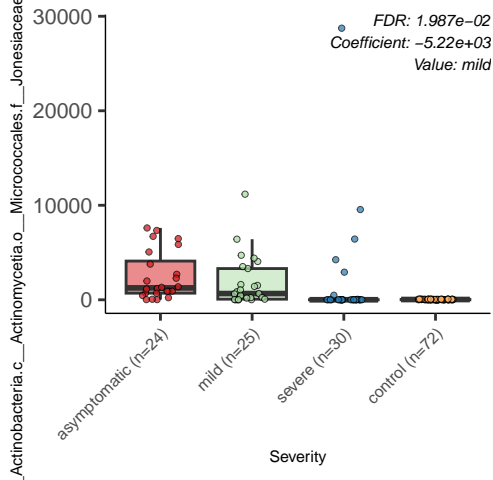

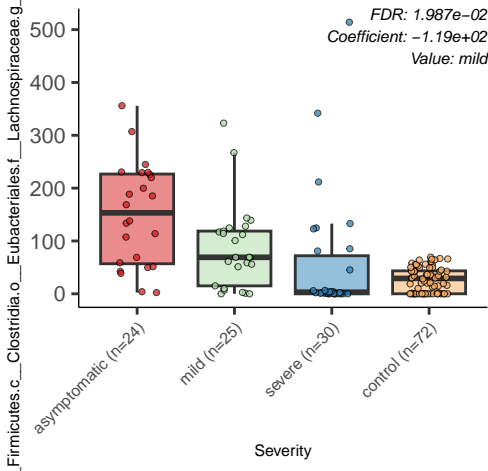

Bacteria.p\_\_Proteobacteria.c\_\_Alphaproteobacteria.o\_\_Hyphomicrobia

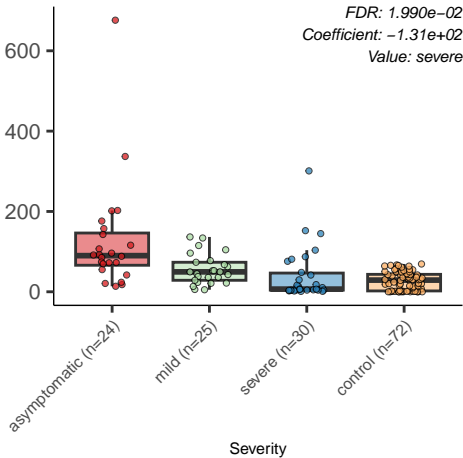

a.p\_\_Proteobacteria.c\_\_Alphaproteobacteria.o\_\_Hyphomicrobiales.

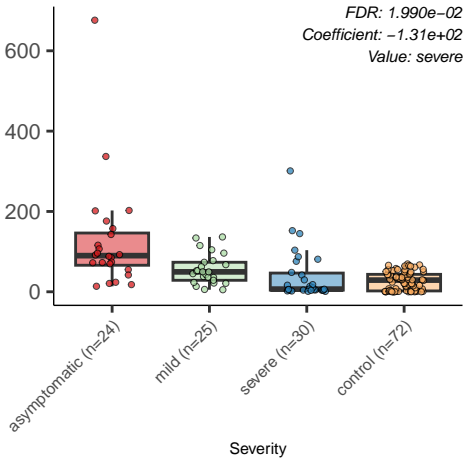



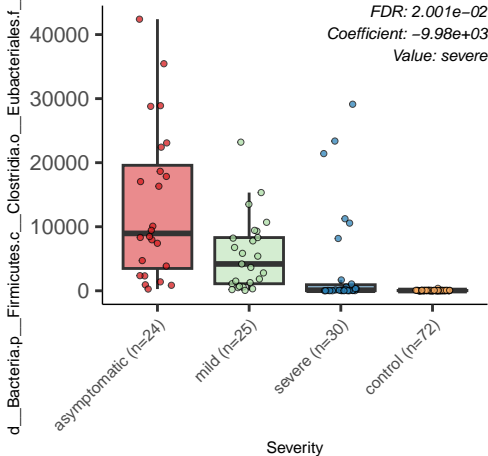

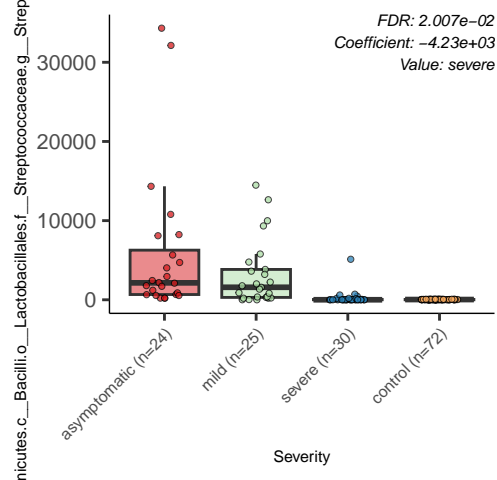

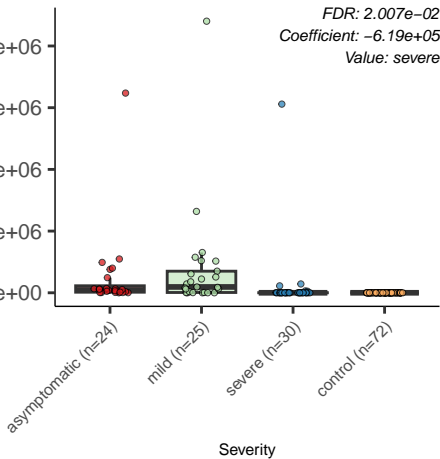

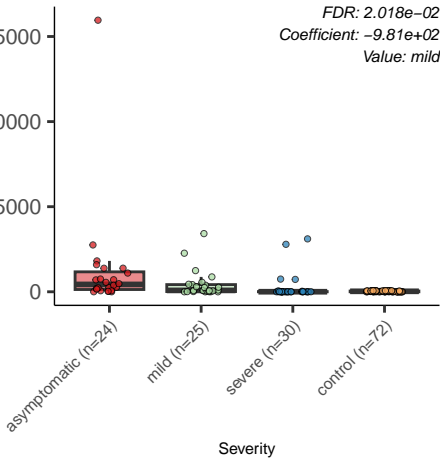

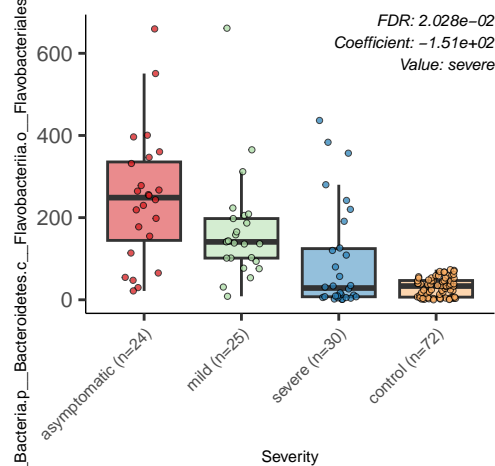

Bacteroidetes.c\_Flavobacteriia.o\_Flavobacteriales.g\_Candidatus

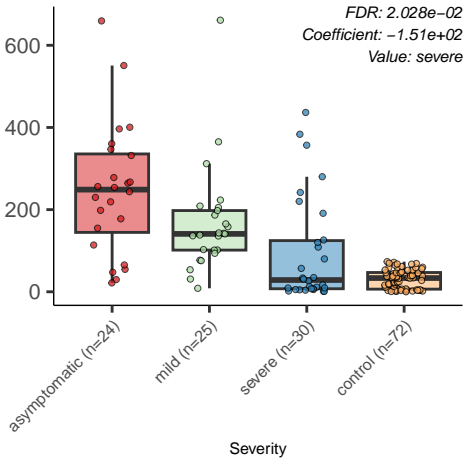

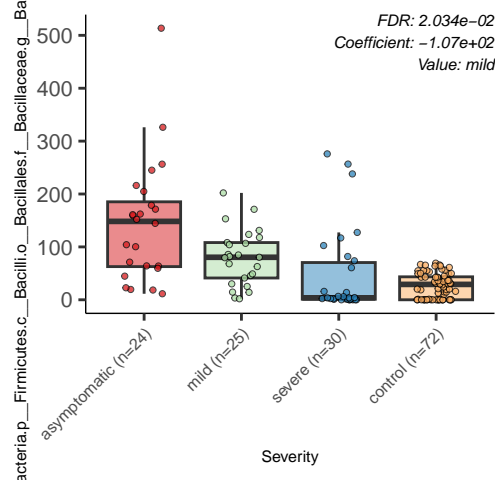

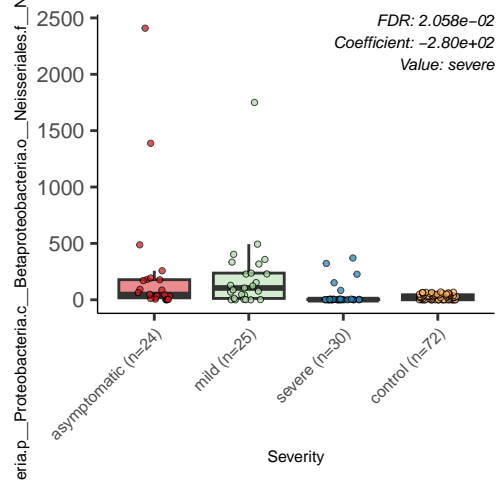



obacteria.c\_\_Betaproteobacteria.o\_\_Neisseriales.f\_\_Neisseriaceae,

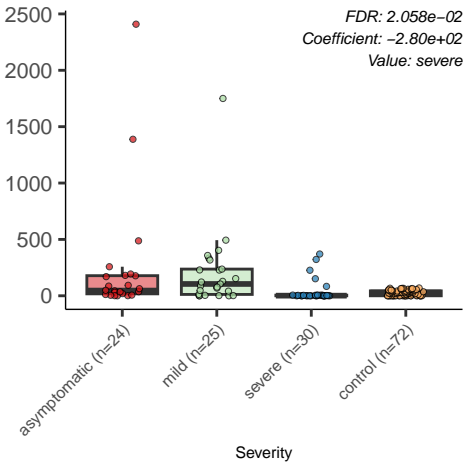

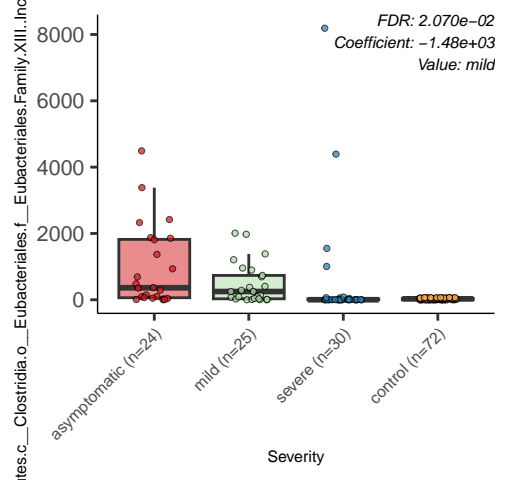

Proteobacteria.c\_\_Alphaproteobacteria.o\_\_Sphingomonadales.f\_\_S

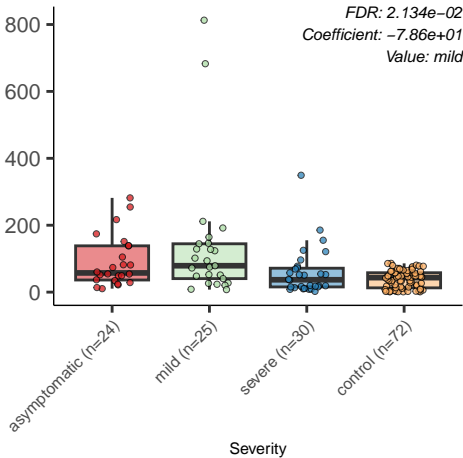

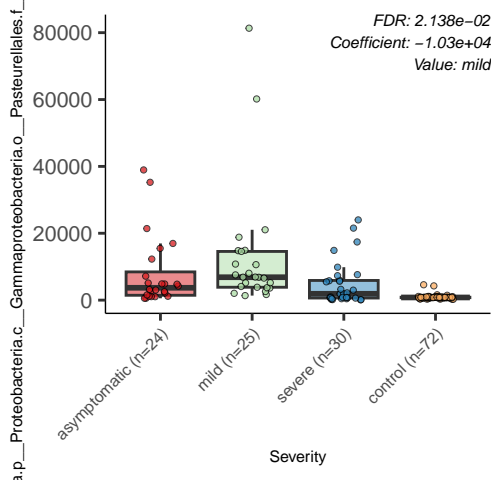

d\_Bacteria.p\_Synergistetes

FDR:  $2.162e-02$   
Coefficient:  $-4.09e+03$   
Value: severe

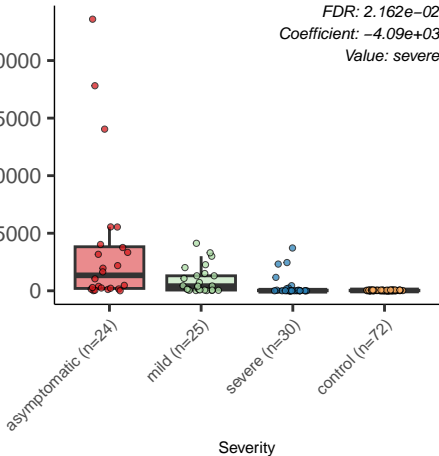

d\_\_Bacteria.p\_\_Synergistetes.c\_\_Synergistia

FDR:  $2.162 \times 10^{-2}$   
Coefficient:  $-4.09 \times 10^3$   
Value: severe

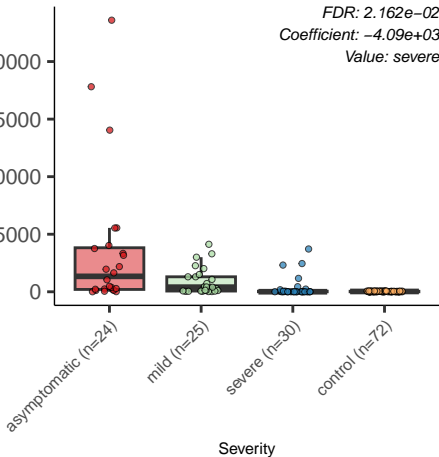

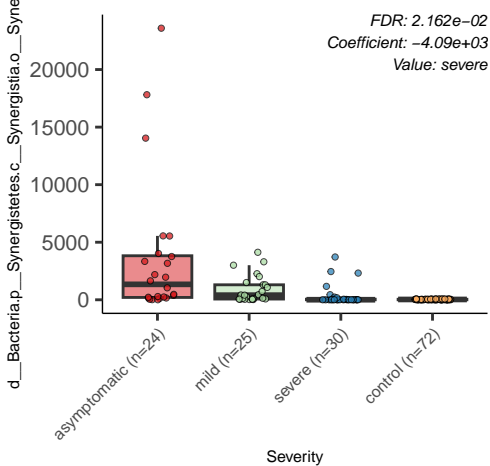

d\_\_Bacteria.p\_\_Synergistetes.c\_\_Synergistia.o\_\_Synergistales.f\_\_

20000  
15000  
10000  
5000  
0

FDR: 2.162e-02  
Coefficient: -4.09e+03  
Value: severe

asymptomatic (n=24)

mild (n=25)

severe (n=30)

control (n=72)

Severity

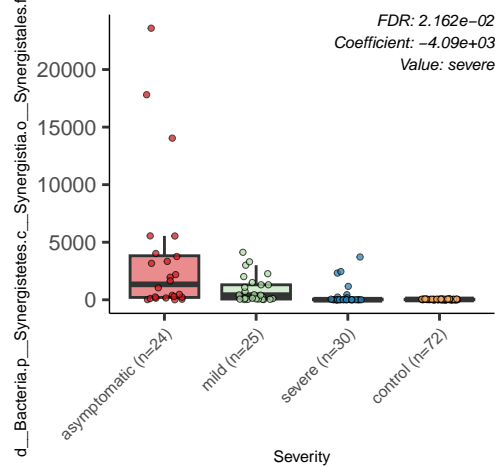



Flavobacteriia.o\_Flavobacteriales.f\_Flavobacteriaceae.g\_Cap

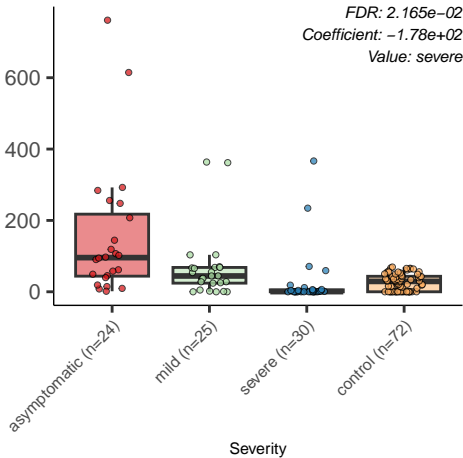

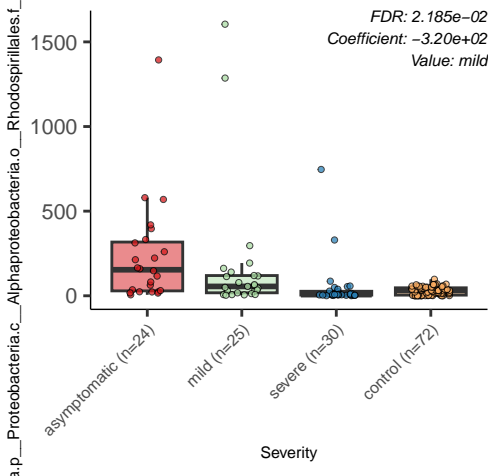

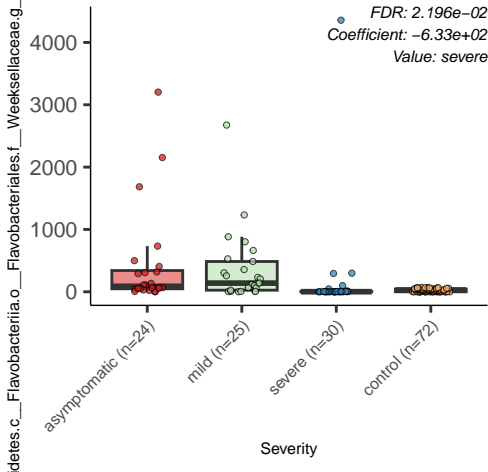

micutes.c\_\_Bacilli.o\_\_Lactobacillales.f\_\_Streptococcaceae.g\_\_Strept

*FDR: 2.215e-02*  
*Coefficient: -4.06e+04*  
*Value: severe*

150000

100000

50000

0

asymptomatic (n=24)

mild (n=25)

severe (n=30)

control (n=72)

Severity

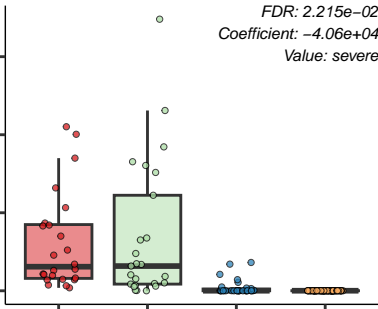

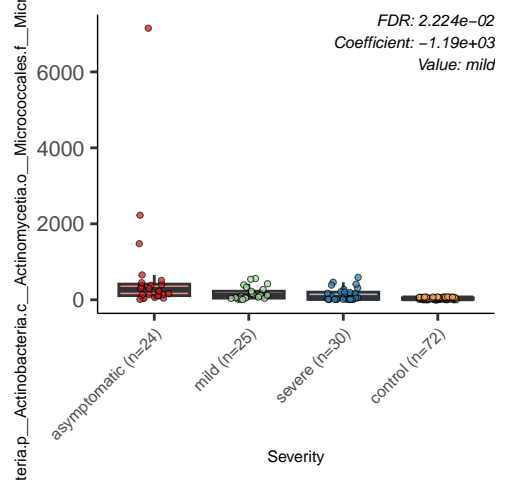

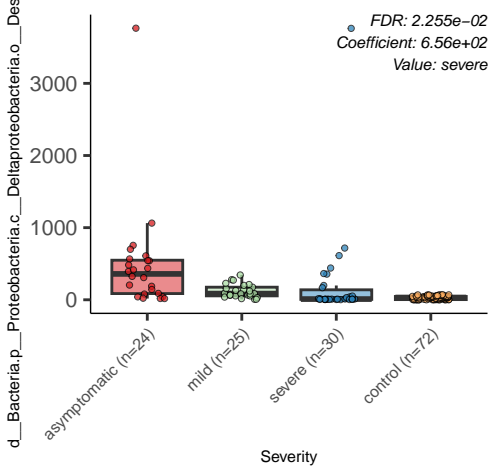

acteria.p\_\_Firmicutes.c\_\_Clostridia.o\_\_Eubacteriales.f\_\_Oscillospira

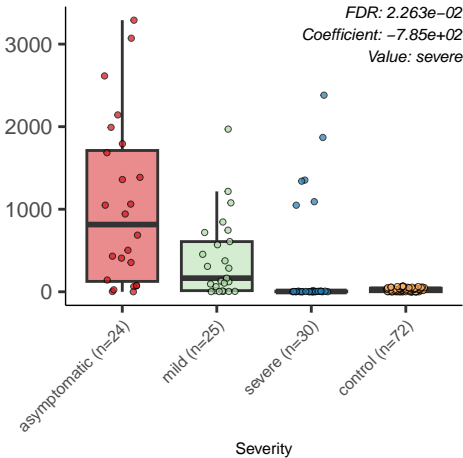

bacteria.p\_\_Proteobacteria.c\_\_Gammaproteobacteria.o\_\_Oceanospirillum

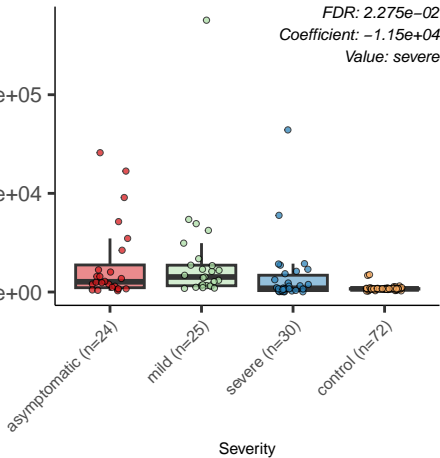



bacteria.p\_Bacteroidetes.c\_Bacteroidia.o\_Marinilabiales.f\_Marin

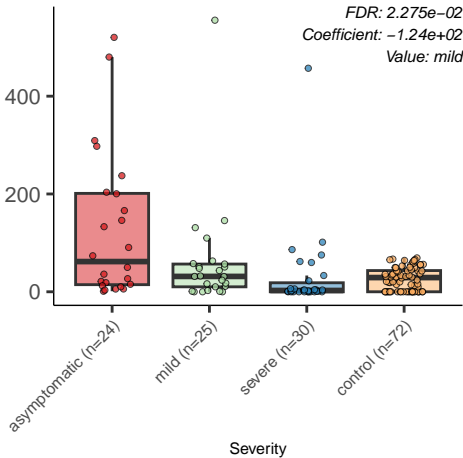

cteroidetes.c\_\_Bacteroidia.o\_\_Marinilabiales.f\_\_Marinilabiales.g\_\_

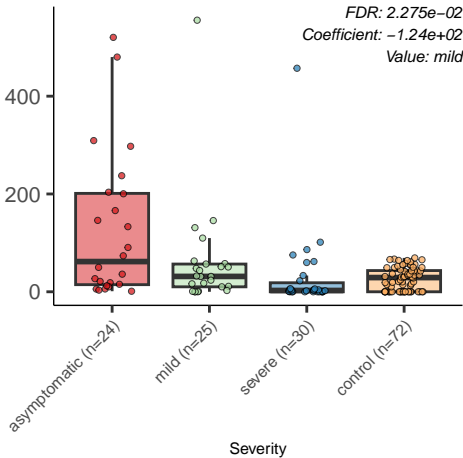

d\_Bacteria.p\_Proteobacteria.c\_Deltaproteobacteria.o\_De

10000

5000

0

asymptomatic (n=24)

mild (n=25)

severe (n=30)

control (n=72)

Severity

FDR:  $2.276e-02$   
Coefficient:  $-1.66e+03$   
Value: mild

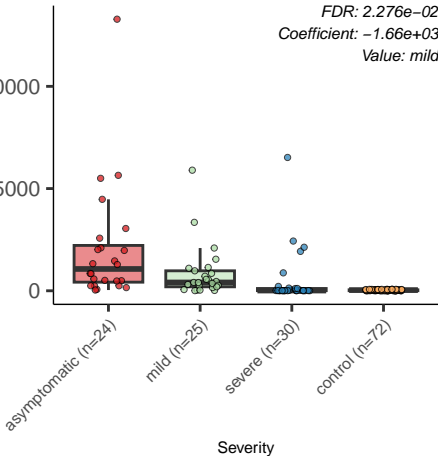

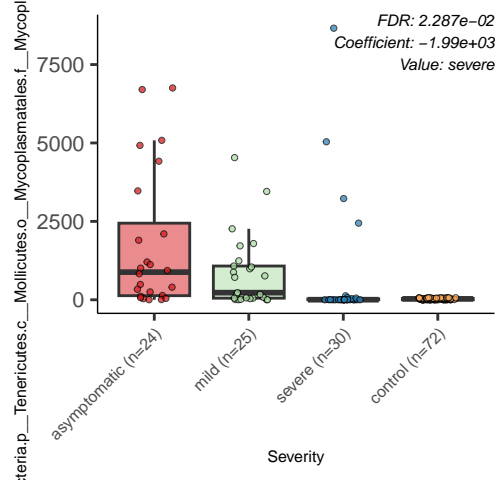

oteobacteria.c\_\_Betaproteobacteria.o\_\_Neisseriales.f\_\_Neisseriace

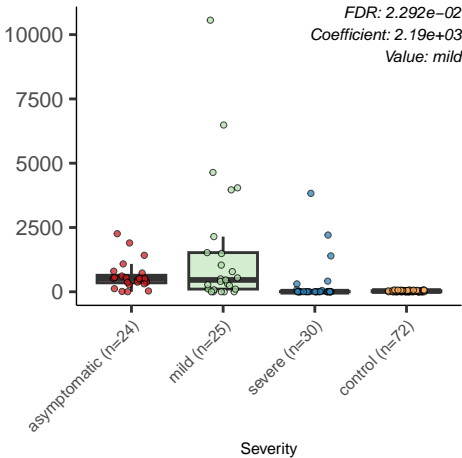

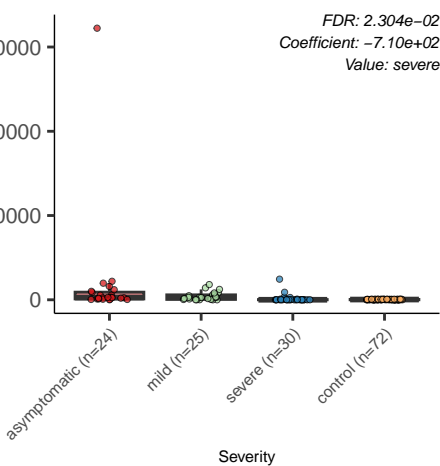

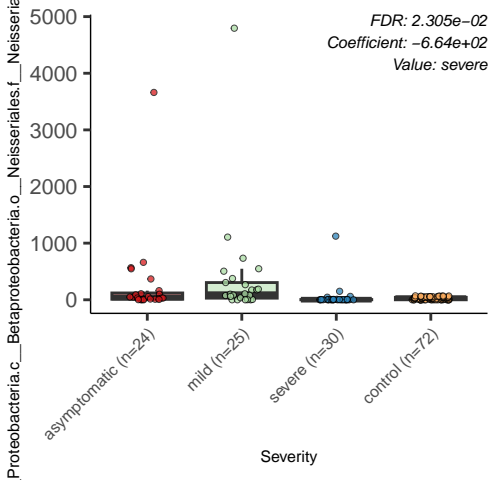

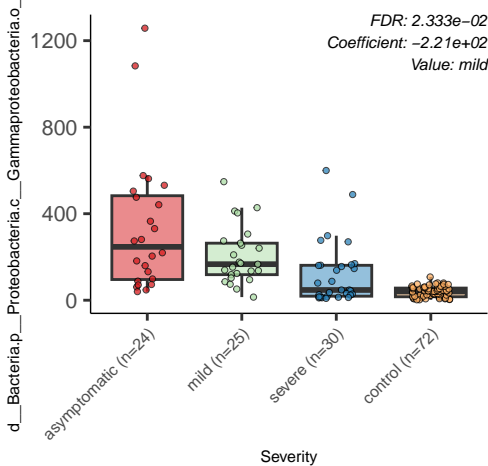





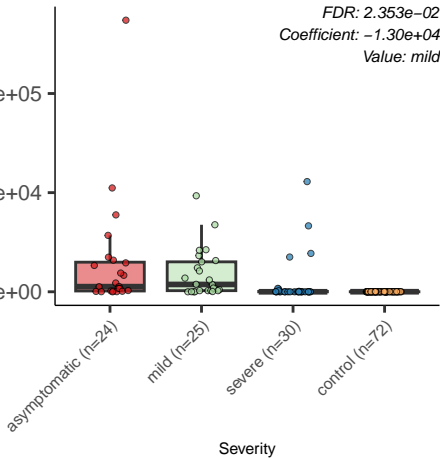

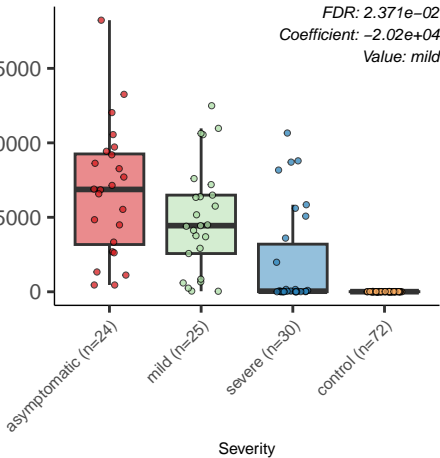

.c\_\_Alphaproteobacteria.o\_\_Sphingomonadales.f\_\_Erythrobacterac

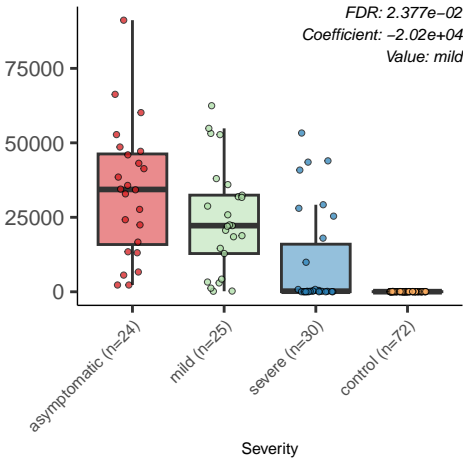

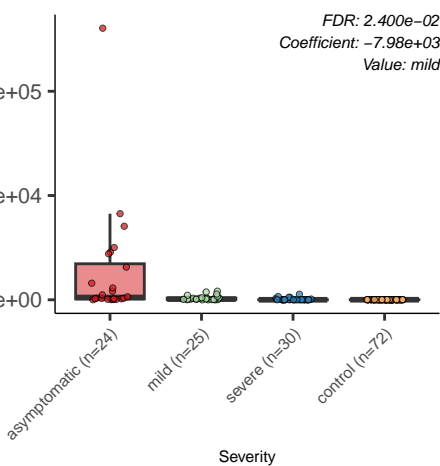

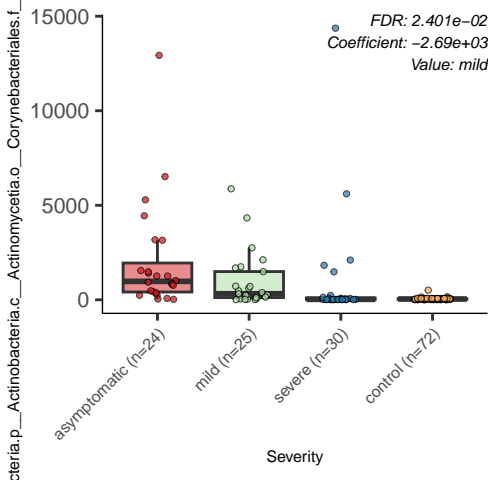

l\_Bacteria.p\_\_Proteobacteria.c\_\_Alphaproteobacteria.o\_\_Ricketts

FDR:  $2.401e-02$   
Coefficient:  $-1.63e+02$   
Value: severe

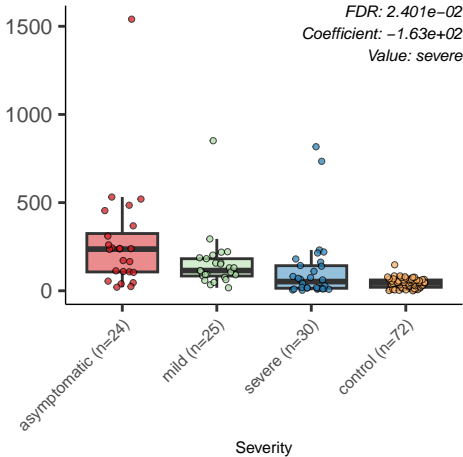

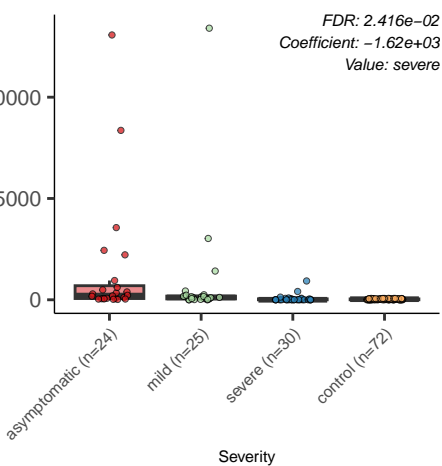



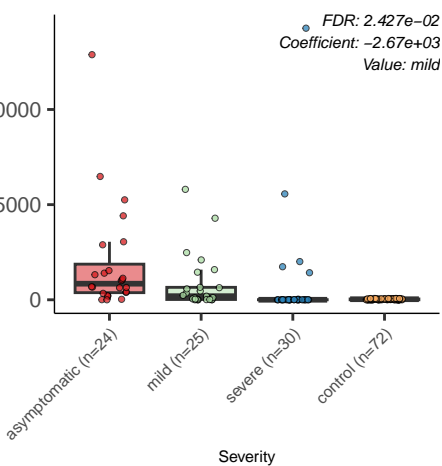

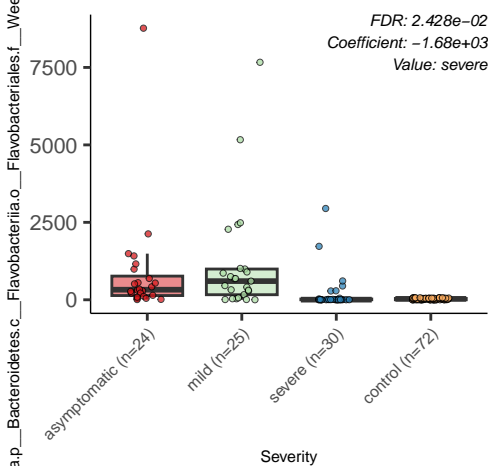

Bacteria.p\_\_Proteobacteria.c\_\_Alphaproteobacteria.o\_\_Hyphomicrobia

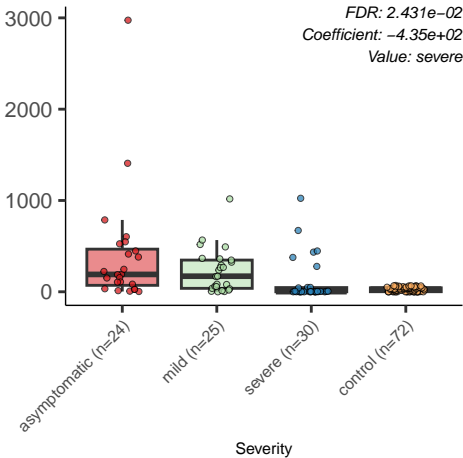

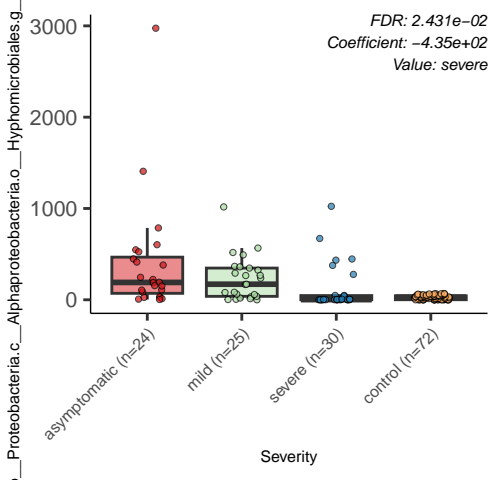

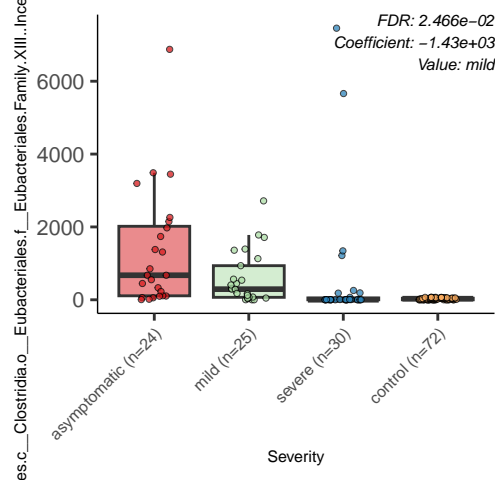

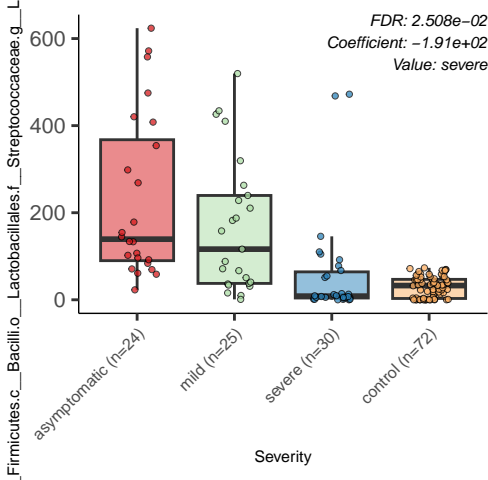

irochaetes.c\_\_Spirochaetia.o\_\_Spirochaetales.f\_\_Treponemataceae

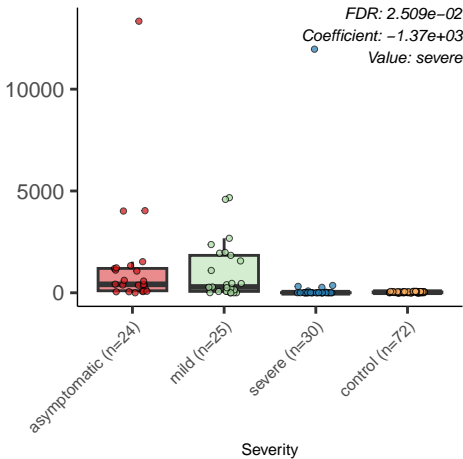

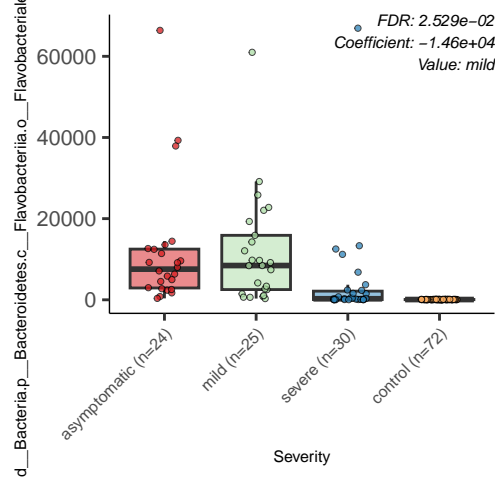



rimonadia.o\_\_Candidatus.Nanosynbacterales.f\_\_Candidatus.Nanos

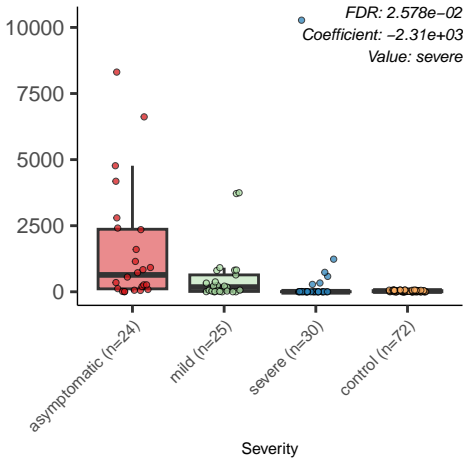

d\_Bacteria.p\_Bacteroidetes.c\_Bacteroidia.o\_Bacteroidales.

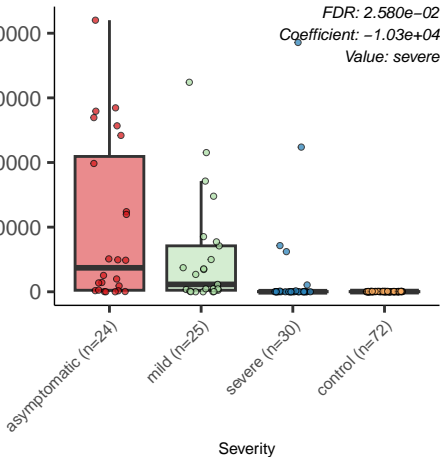

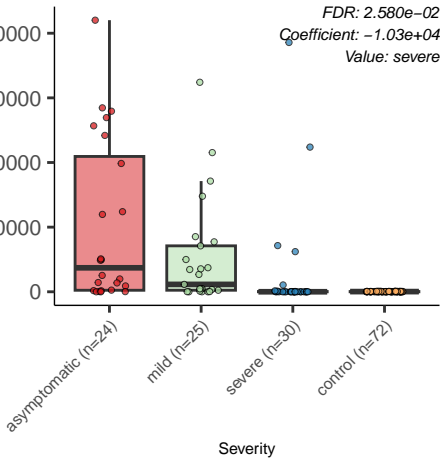

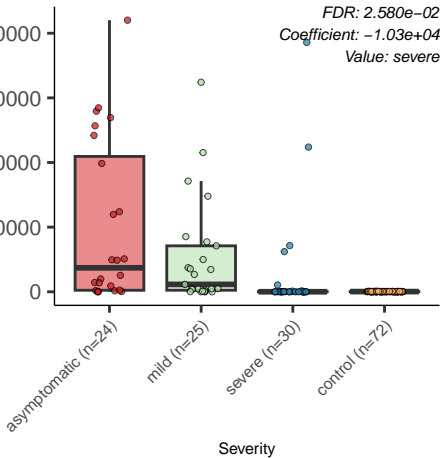

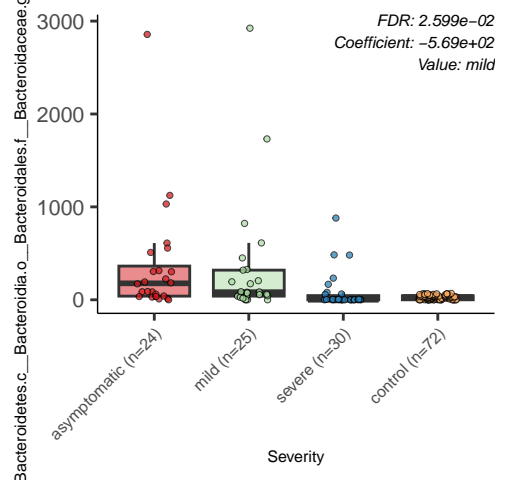

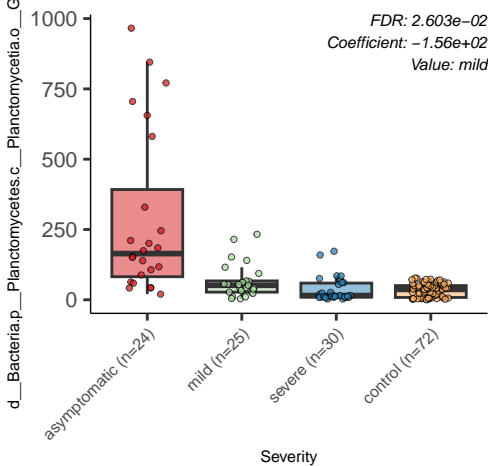

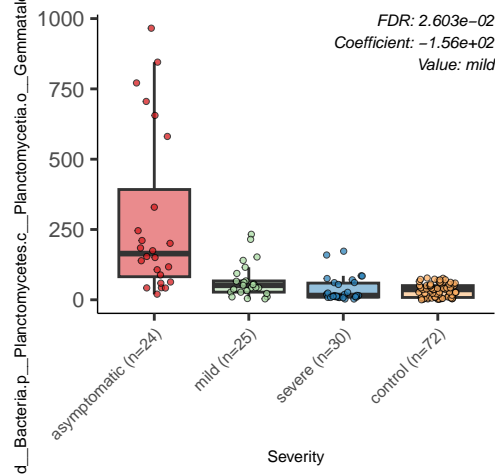

eroidetes.c\_\_Bacteroidia.o\_\_Bacteroidales.f\_\_Bacteroidaceae.g\_\_B

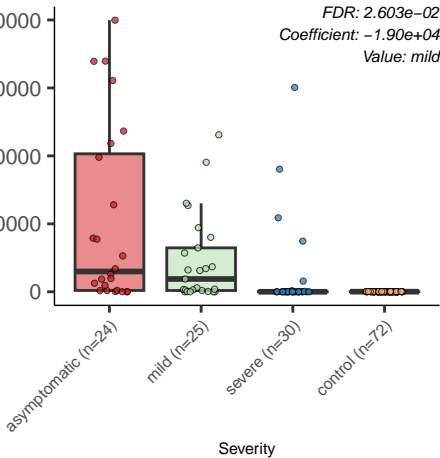



d\_\_Bacteria.p\_\_Bacteroidetes.c\_\_Bacteroidia.o\_\_Bacteroidales.f\_\_

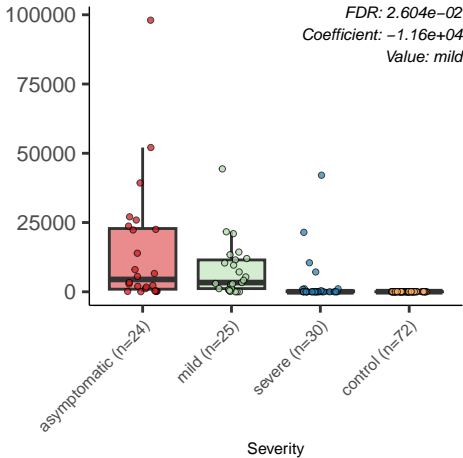

bacteria.c\_Actinomycetia.o\_Micrococcales.f\_Microbacteriaceae.g

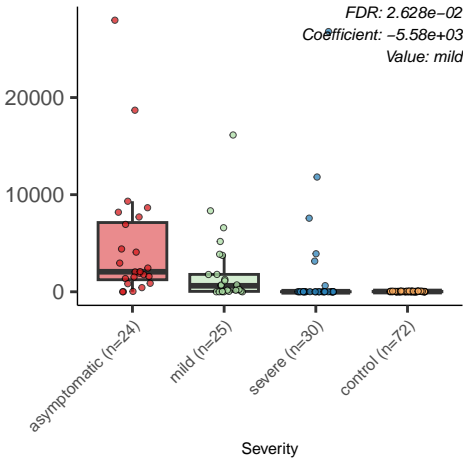

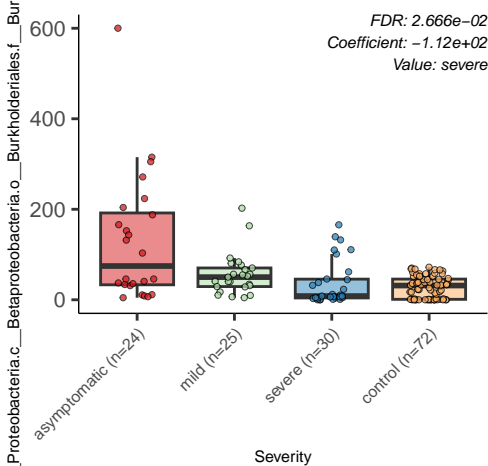

Firmicutes.c\_Bacilli.o\_Lactobacillales.f\_Streptococcaceae.g\_St

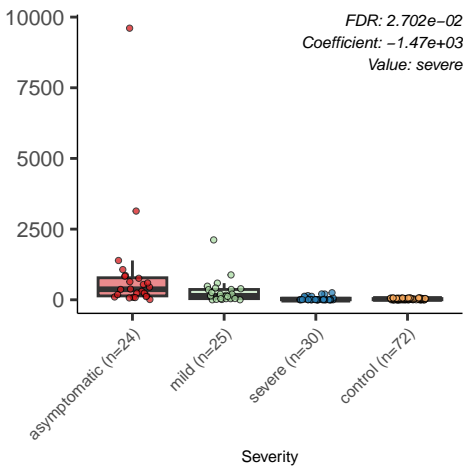

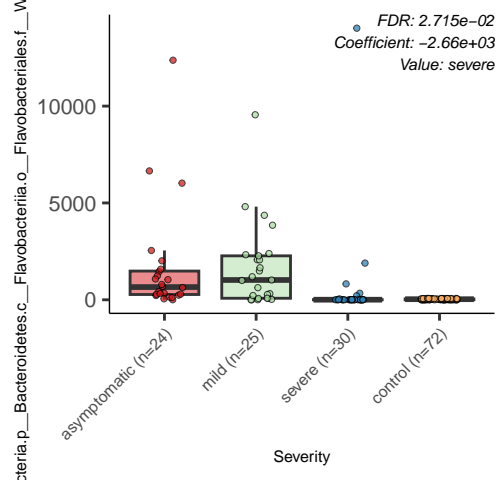

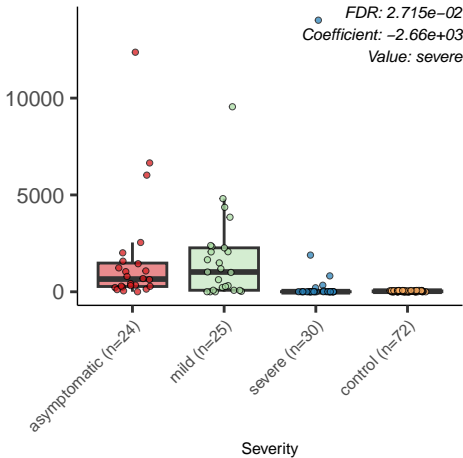

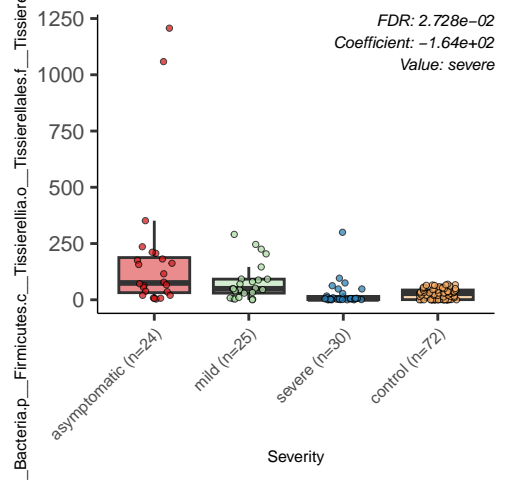

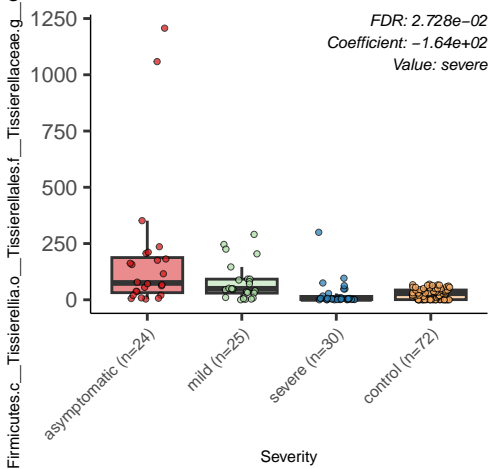



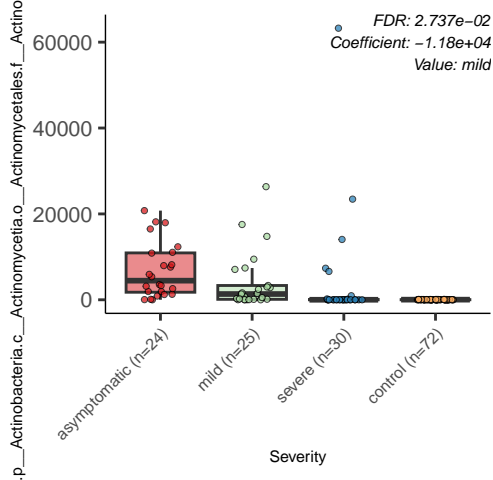

eria.p\_Actinobacteria.c\_Actinomycetia.o\_Micrococcales.f\_Micro

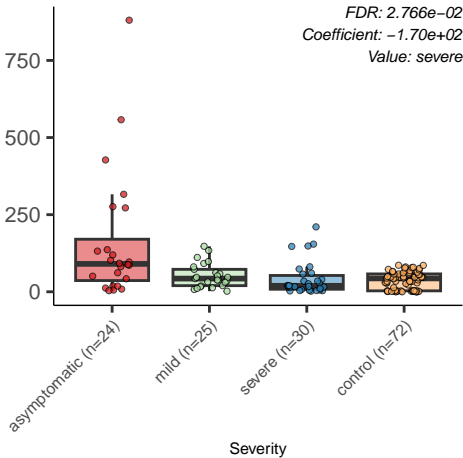

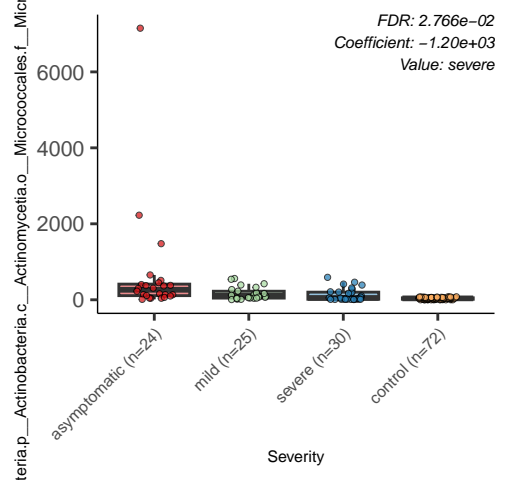

ria.p\_\_Firmicutes.c\_\_Erysipelotrichia.o\_\_Erysipelotrichales.f\_\_Erys

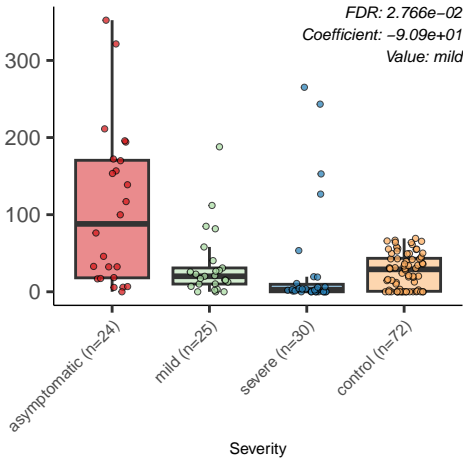

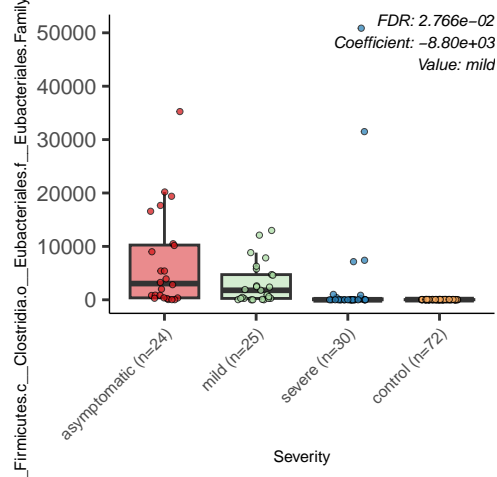

Clostridia.o\_Eubacteriales.f\_Eubacteriales.Family.XIII..Incerta

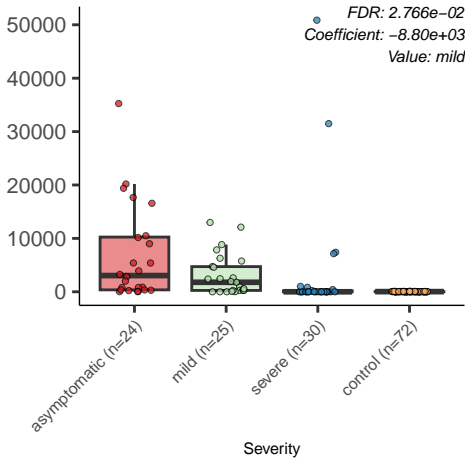

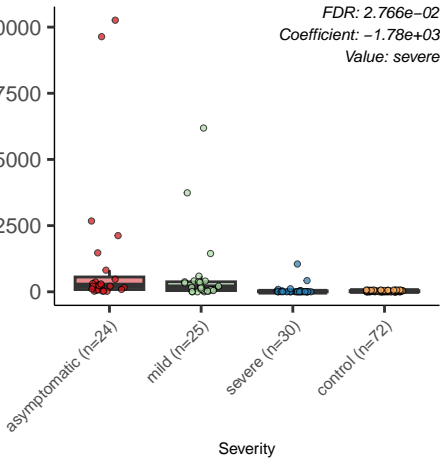

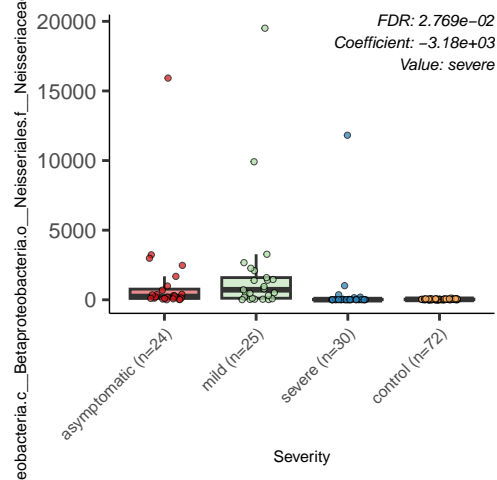



bacteria.p\_\_Synergistetes.c\_\_Synergistia.o\_\_Synergistales.f\_\_Syne

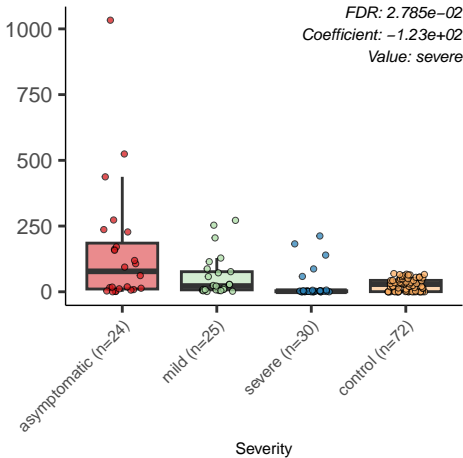

Synergistetes.c\_\_Synergistia.o\_\_Synergistales.f\_\_Synergistaceae.g

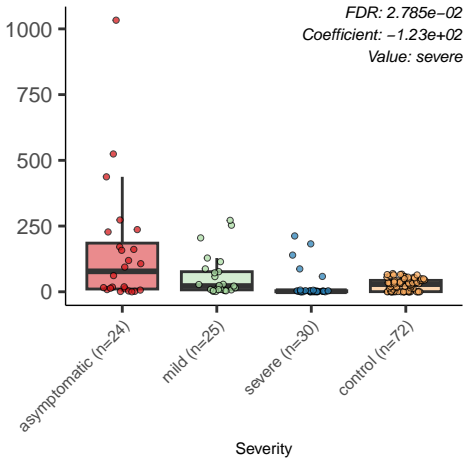

Bacteria.p\_Firmicutes.c\_Clostridia.o\_Eubacteriales.f\_Eubacteri

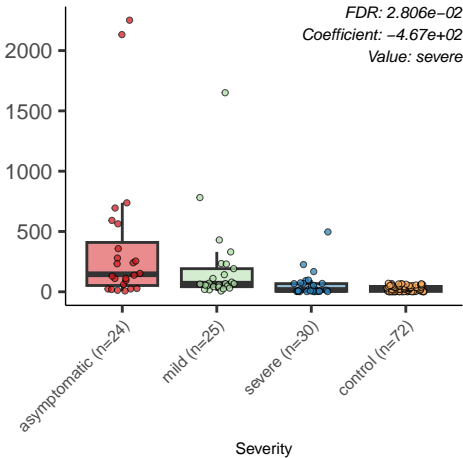

\_Bacteria.p\_\_Proteobacteria.c\_\_Gammaproteobacteria.o\_\_Chroma

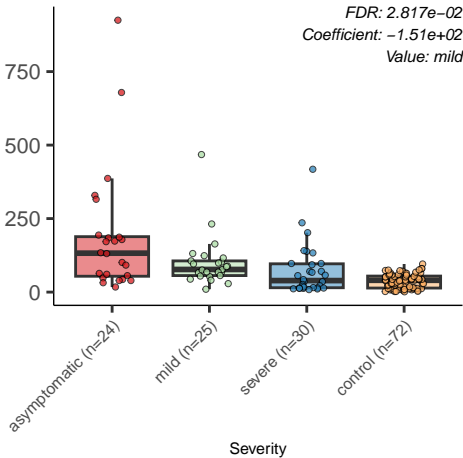

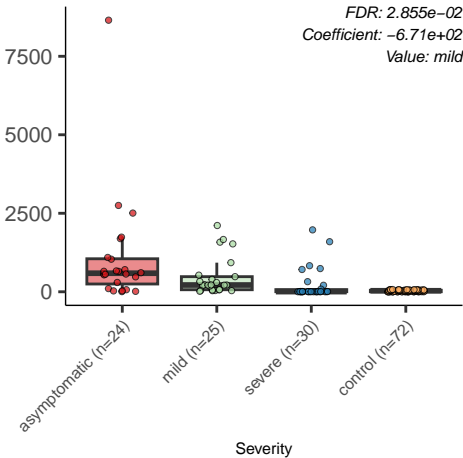

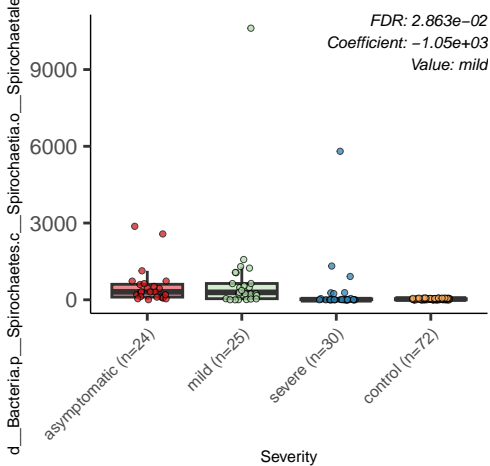

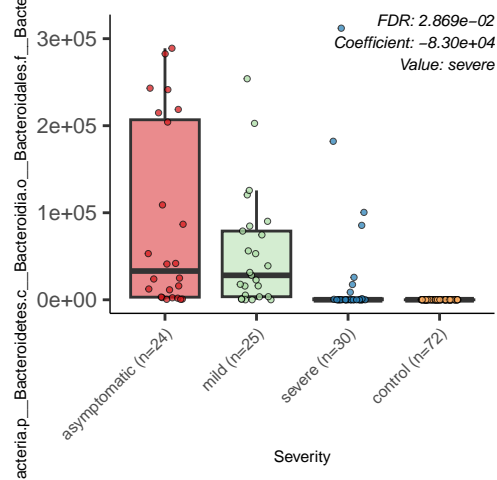

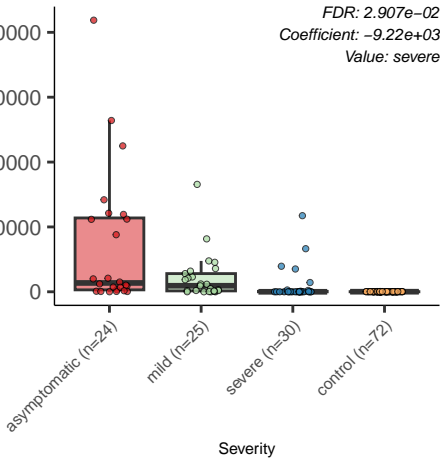



bidetes.c\_\_Cytophagia.o\_\_Cytophagales.f\_\_Hymenobacteraceae.g

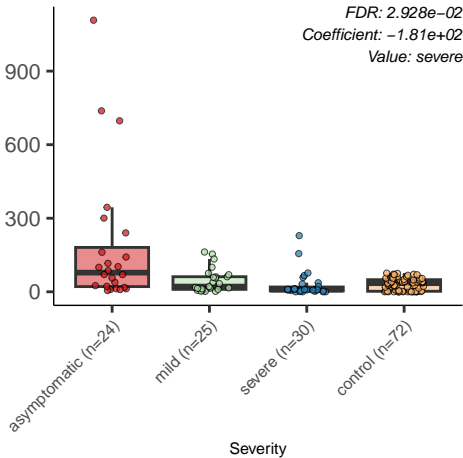

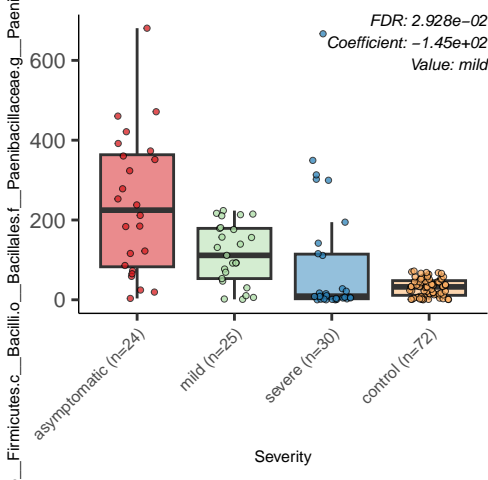

d\_Bacteria.p\_\_Bacteroidetes.c\_\_Cytophagia.o\_\_Cytophagales.f

2000

1000

0

asymptomatic (n=24)

mild (n=25)

severe (n=30)

control (n=72)

Severity

FDR:  $2.929e-02$   
Coefficient:  $-6.55e+02$   
Value: mild

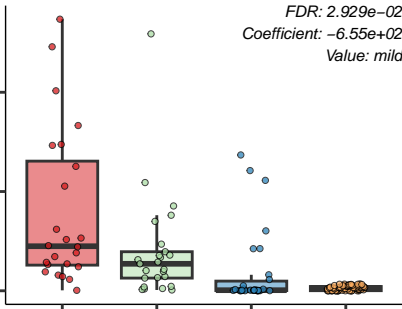

d\_Bacteria.p\_Thermotogae.c\_Thermotogae.o\_Thermotogales

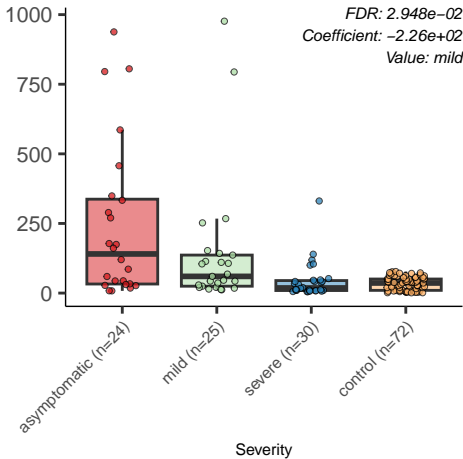

d\_Bacteria.p\_Actinobacteria.c\_Actinomycetia.o\_Corynebacteri

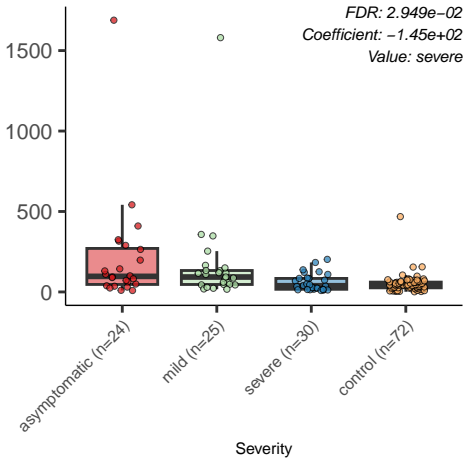

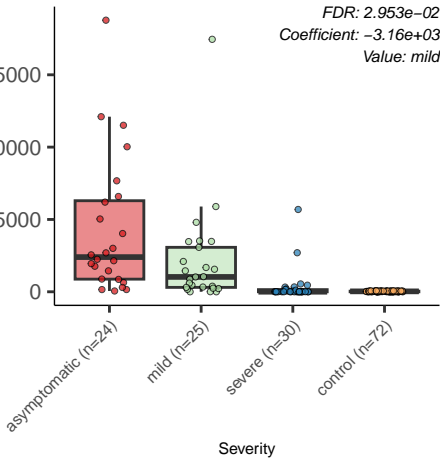

eria.c\_\_Alphaproteobacteria.o\_\_Rhodospirillales.f\_\_Rhodospirillace

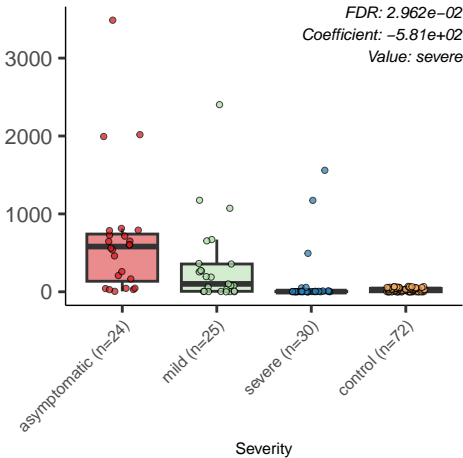

Proteobacteria.c\_\_Alphaproteobacteria.o\_\_Rhodospirillales.f\_\_R

FDR:  $2.986 \times 10^{-2}$   
Coefficient:  $-5.81 \times 10^2$   
Value: severe

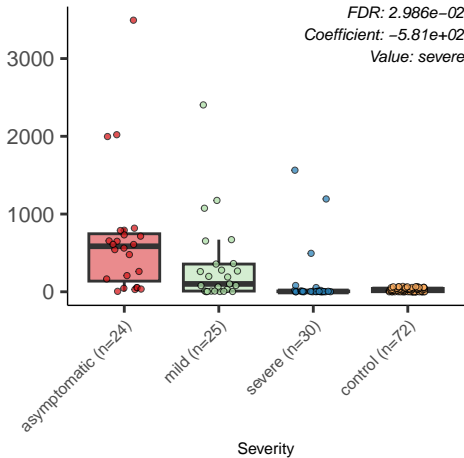



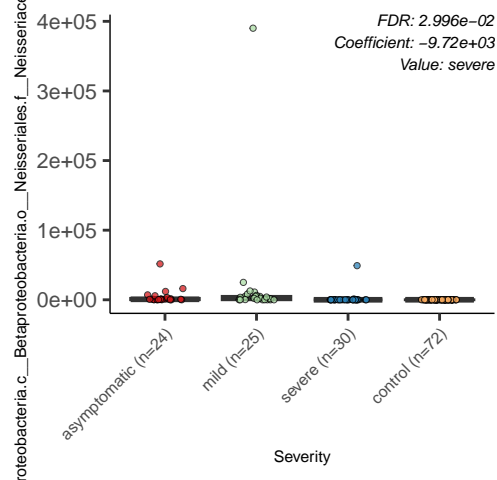

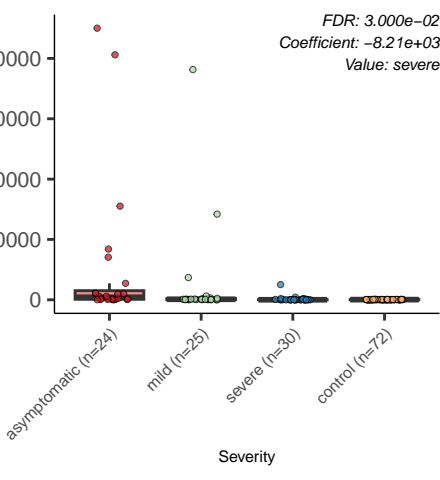

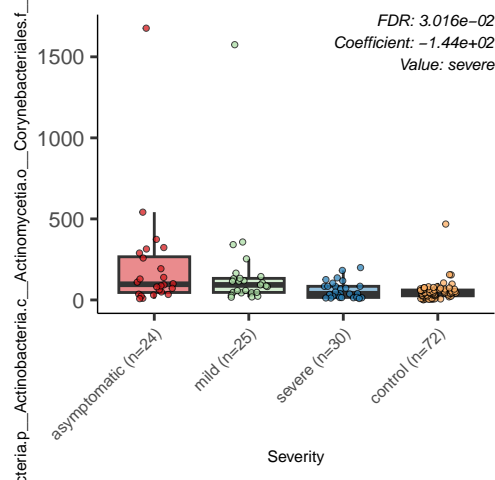

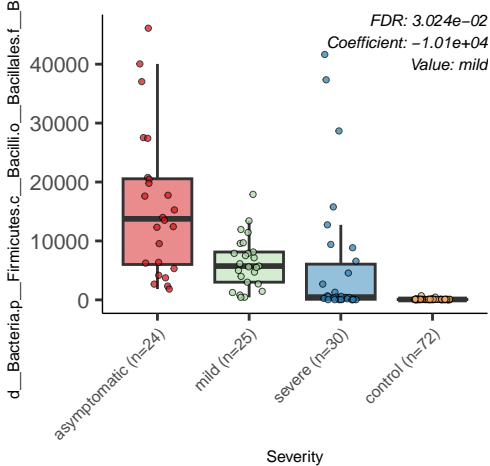

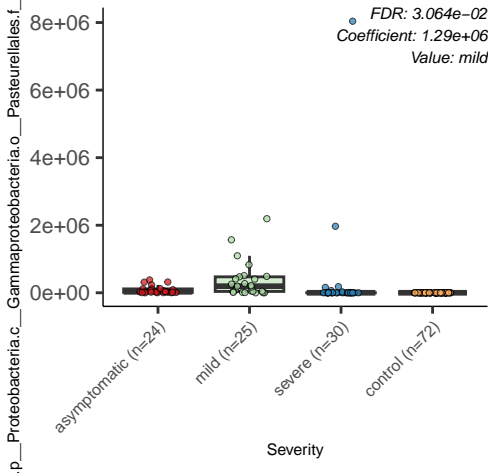

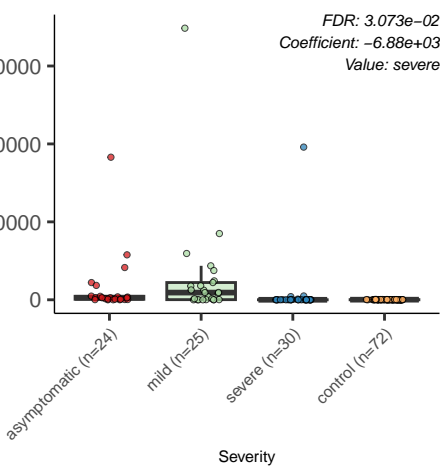

d\_Bacteria.p\_Actinobacteria

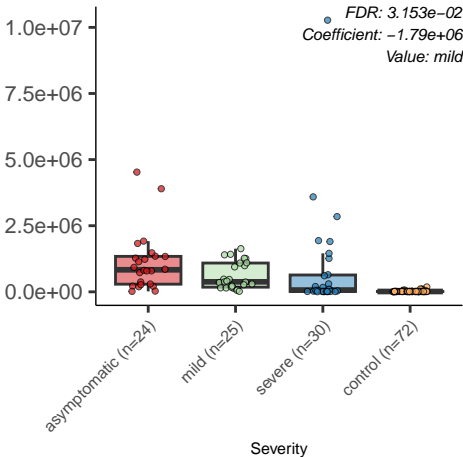

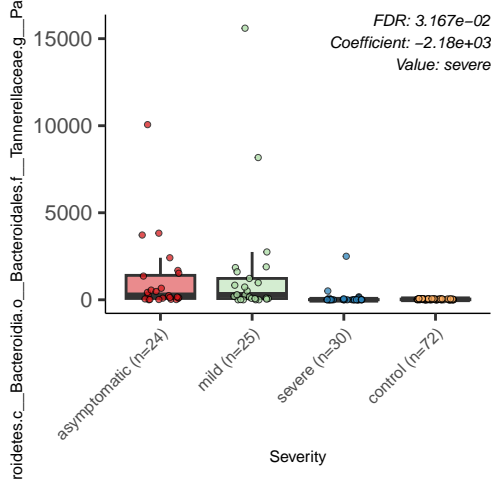



rmicutes.c\_\_Bacilli.o\_\_Lactobacillales.f\_\_Streptococcaceae.g\_\_Stre

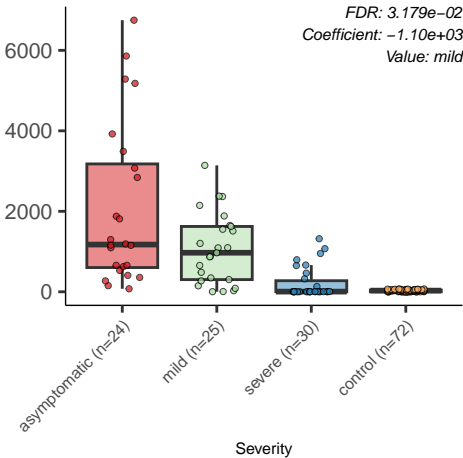

\_\_Proteobacteria.c\_\_Gammaproteobacteria.o\_\_Oceanospirillales.f

*FDR: 3.192e-02*  
*Coefficient: -1.09e+04*  
*Value: severe*

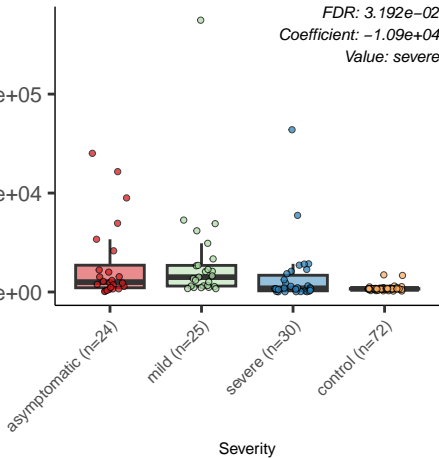

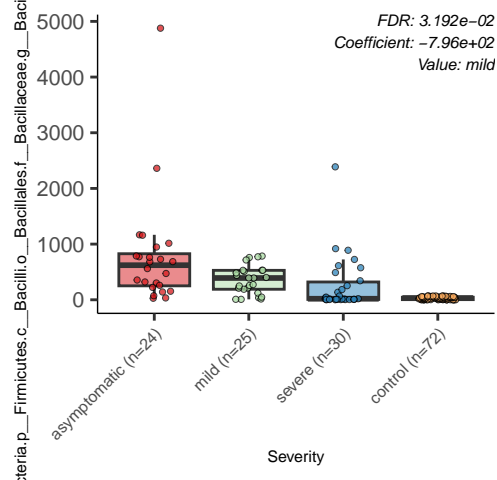

Firmicutes.c\_Bacilli.o\_Lactobacillales.f\_Lactobacillaceae.g\_La

*FDR: 3.205e-02*  
*Coefficient: -2.86e+02*  
*Value: severe*

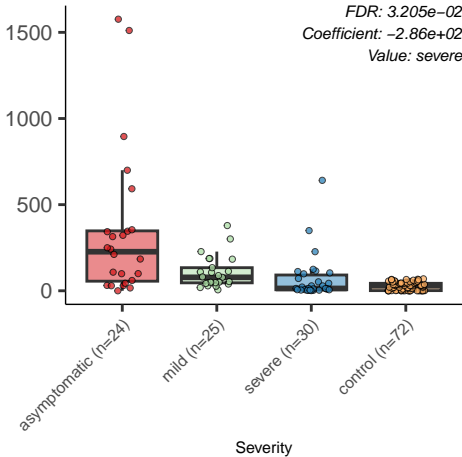

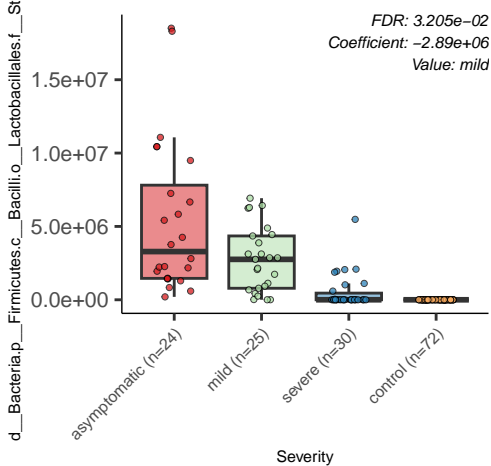

d\_Bacteria.p\_Firmicutes.c\_Bacilli.o\_Bacillales.f\_Bacillao

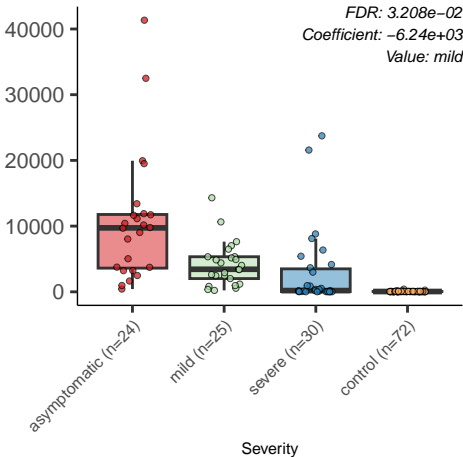

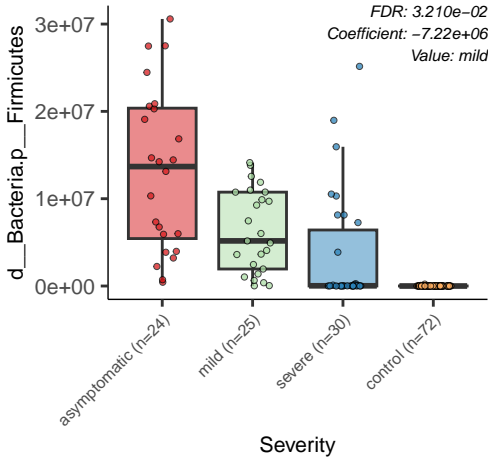

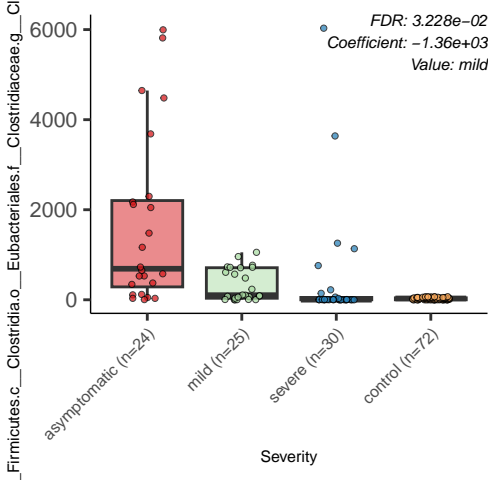



FDR:  $3.264e-02$   
Coefficient:  $-2.85e+02$   
Value: mild

1000

500

0

asymptomatic (n=24)

mild (n=25)

severe (n=30)

control (n=72)

Severity

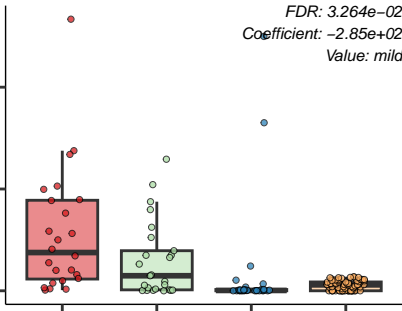

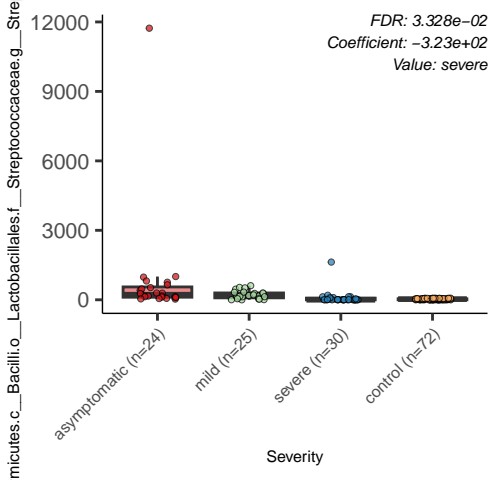

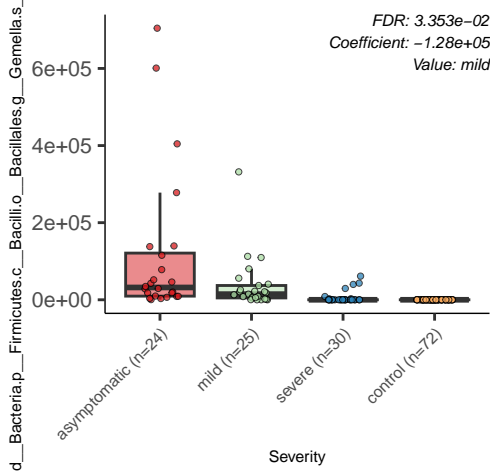

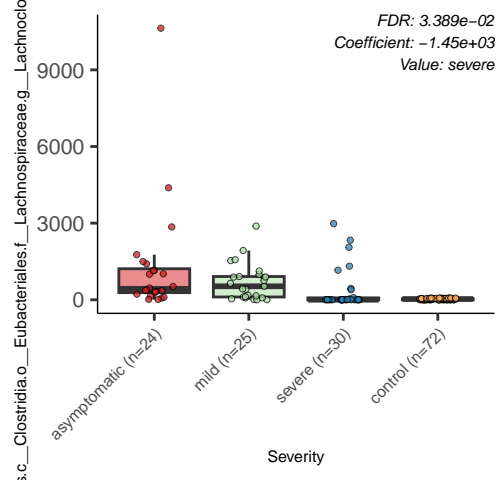

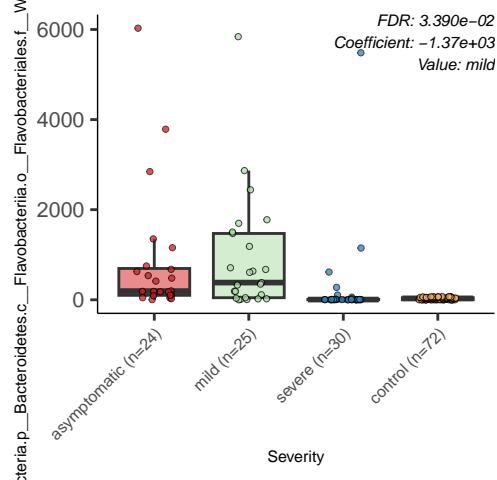

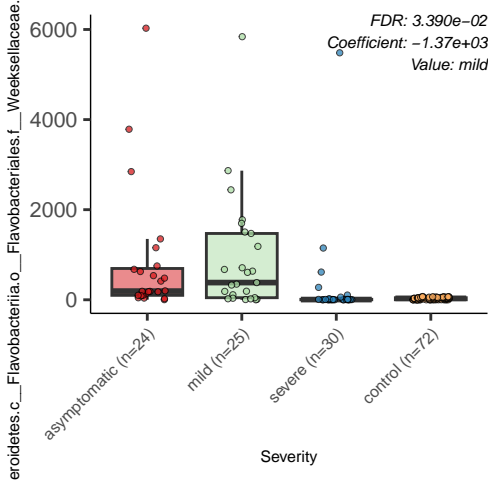

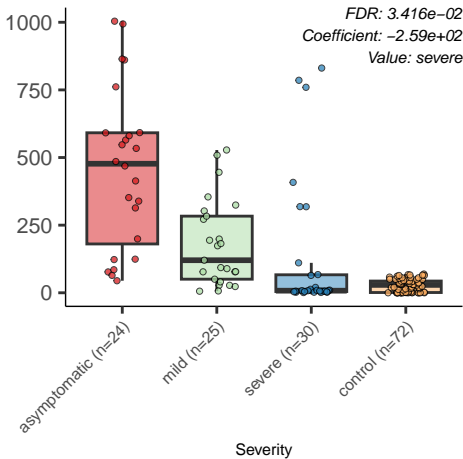

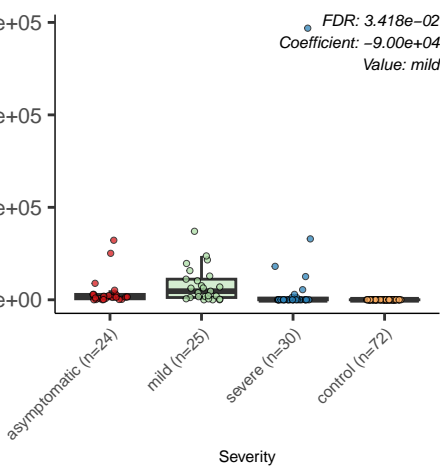



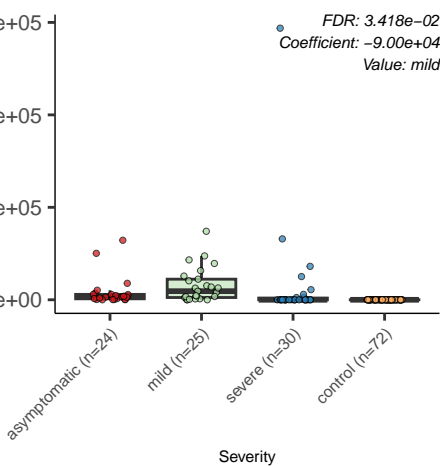

bacteria.p\_\_Proteobacteria.c\_\_Deltaproteobacteria.o\_\_Desulfobacte

10000

5000

0

asymptomatic (n=24)

mild (n=25)

severe (n=30)

control (n=72)

Severity

FDR:  $3.423e-02$   
Coefficient:  $-1.26e+03$   
Value: severe

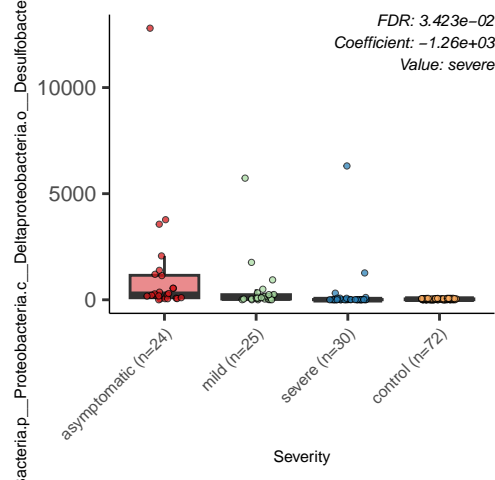

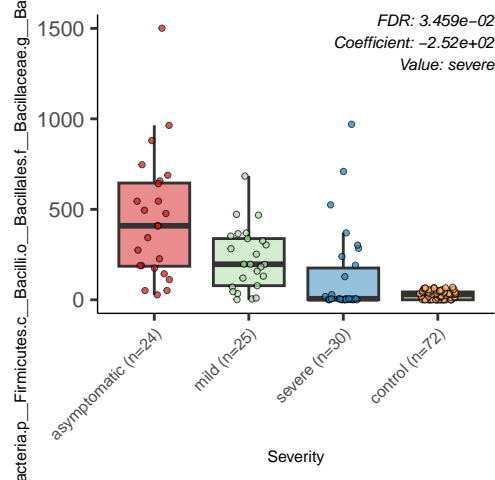

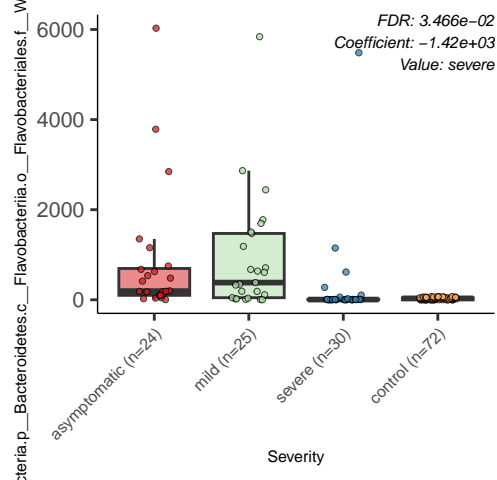

eroidetes.c\_\_Flavobacteriia.o\_\_Flavobacteriales.f\_\_Weeksellaceae.

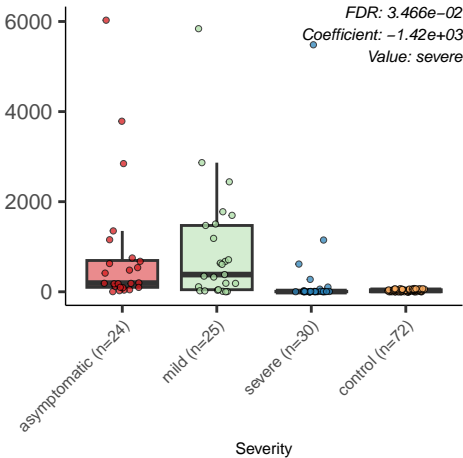

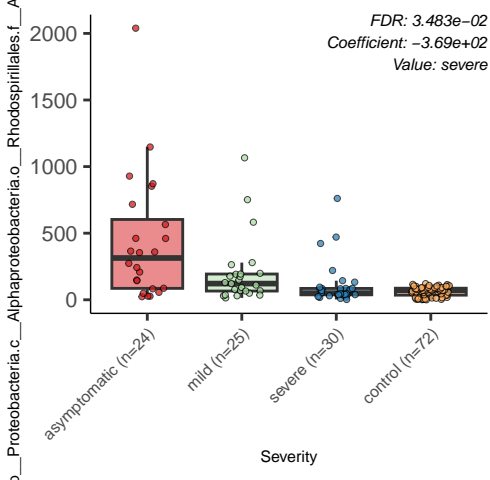

tes.c\_Flavobacteriia.o\_Flavobacteriales.f\_Weeksellaceae.g\_CP

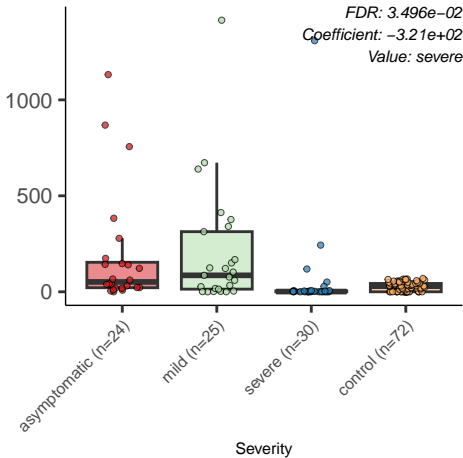

Bacteria.p\_Firmicutes.c\_Bacilli.o\_Lactobacillales.f\_Streptococ

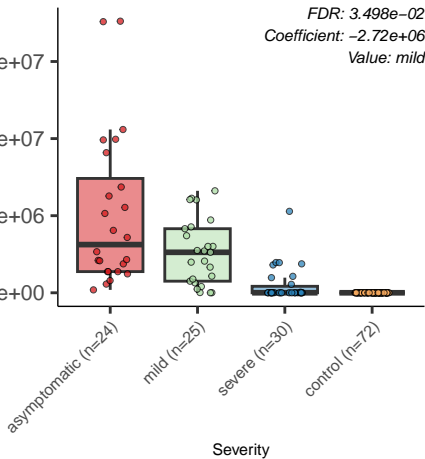



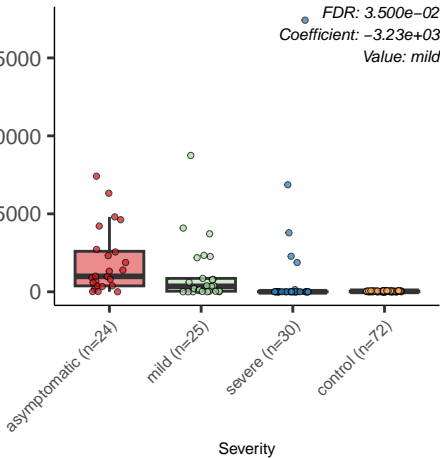

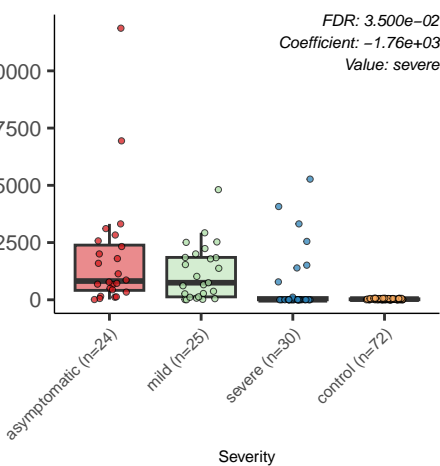

es.c\_\_Clostridia.o\_\_Eubacteriales.f\_\_Lachnospiraceae.g\_\_Pseudob

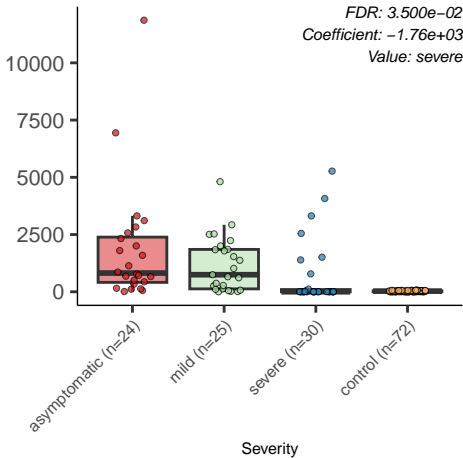

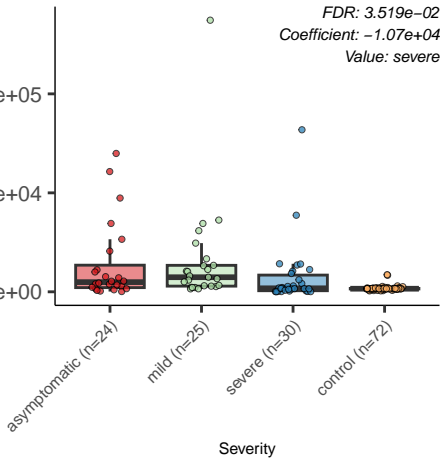

.c\_\_Flavobacteriia.o\_\_Flavobacteriales.f\_\_Weeksellaceae.g\_\_Eliza

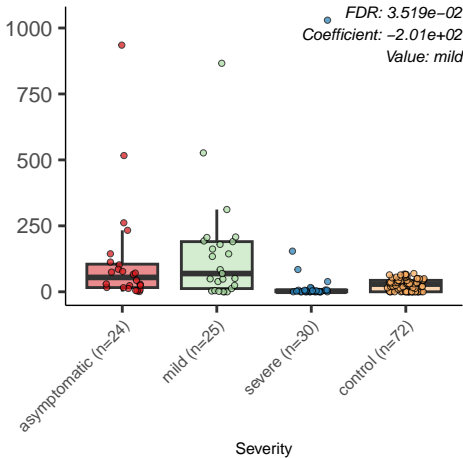

Bacteroidetes.c\_Bacteroidia.o\_Bacteroidales.f\_Bacteroidaceae.g

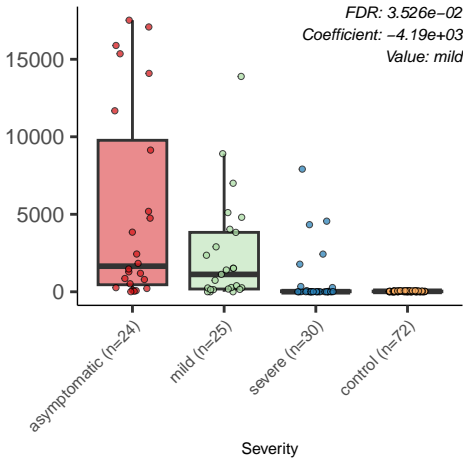

Firmicutes.c\_Bacilli.o\_Lactobacillales.f\_Streptococcaceae.g

2000

1000

0

FDR:  $3.545e-02$

Coefficient:  $-4.65e+02$

Value: mild

asymptomatic (n=24)

mild (n=25)

severe (n=30)

control (n=72)

Severity

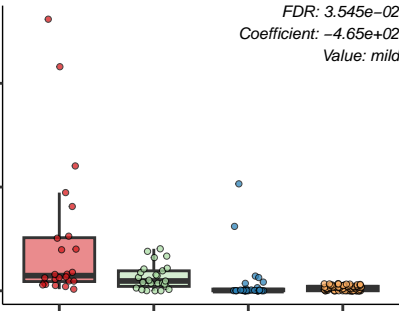

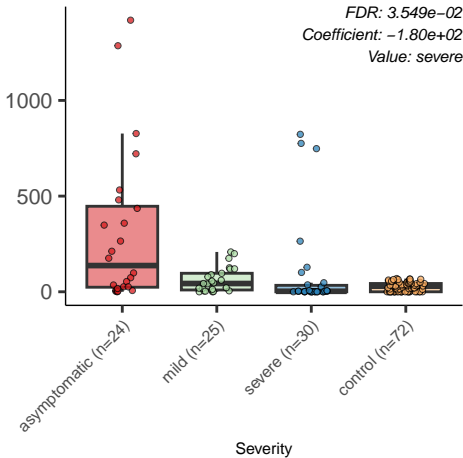



Bacteria.p\_Actinobacteria.c\_Thermoleophilia.o\_Solirubrobactera

FDR:  $3.555e-02$   
Coefficient:  $-4.15e+02$   
Value: severe

2000  
1000  
0

asymptomatic (n=24)

mild (n=25)

severe (n=30)

control (n=72)

Severity

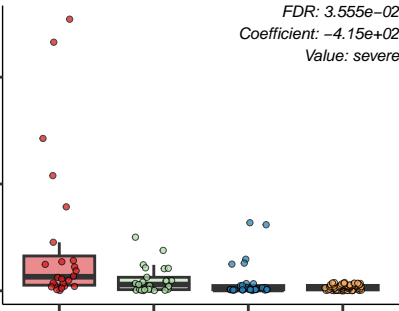

o\_Actinobacteria.c\_Thermoleophilia.o\_Solirubrobacterales.f\_Co

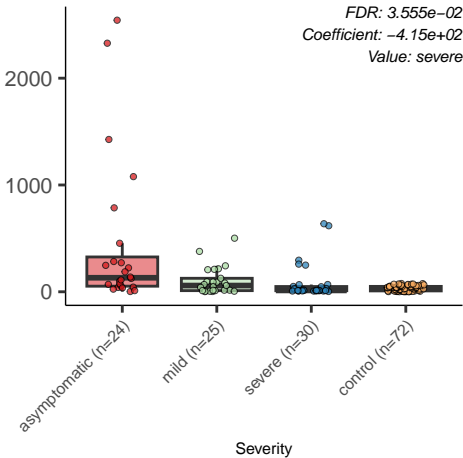

firmicutes.c\_\_Clostridia.o\_\_Thermoanaerobacterales.f\_\_Thermoana

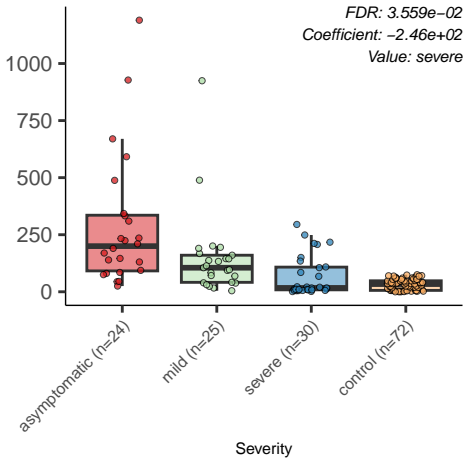

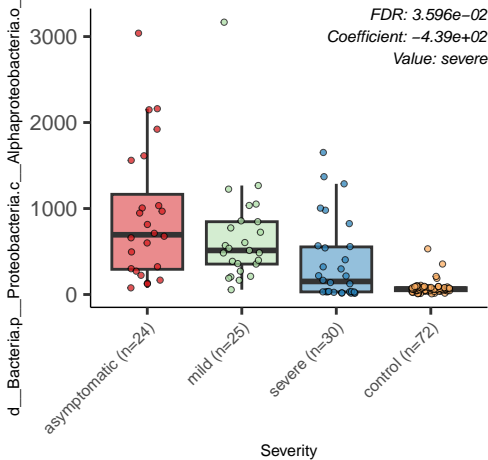

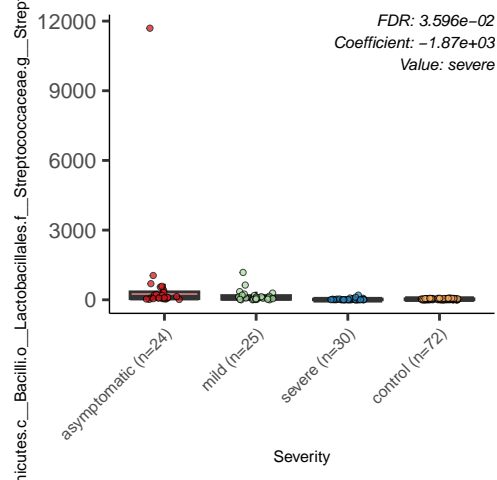

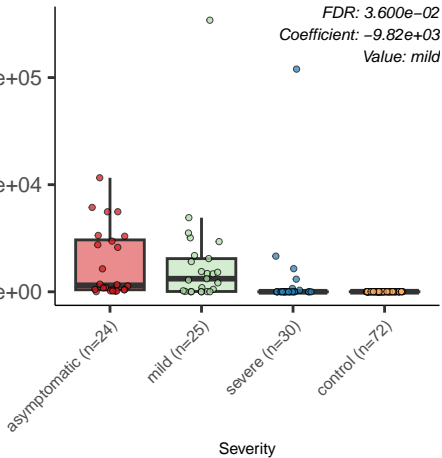

cteria.c\_Actinomycetia.o\_Actinomycetales.f\_Actinomycetaceae.

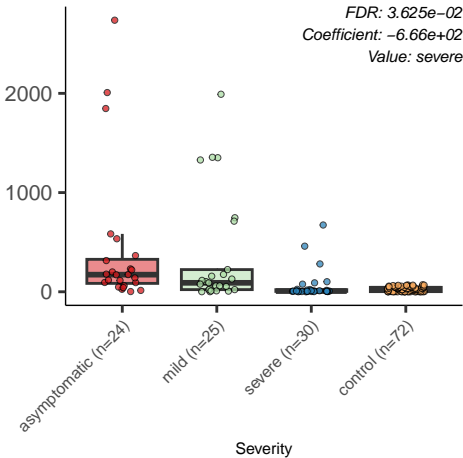





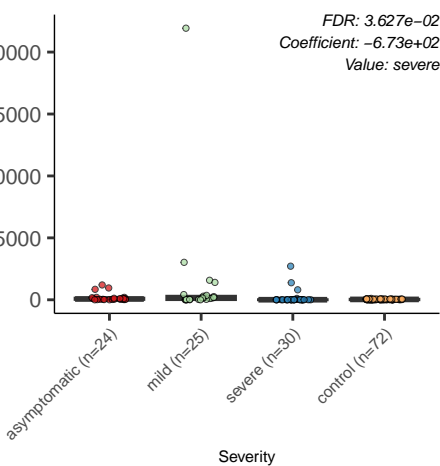

Proteobacteria.c\_\_Deltaproteobacteria.o\_\_Desulfobacterales.f\_\_

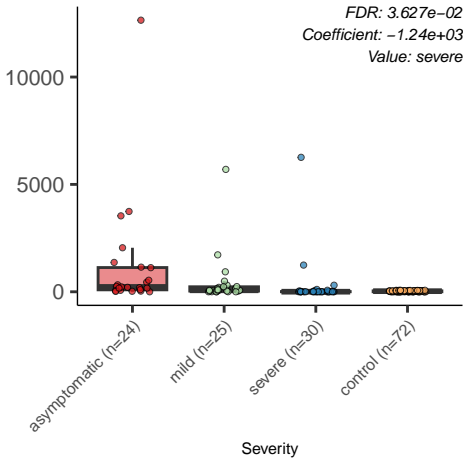

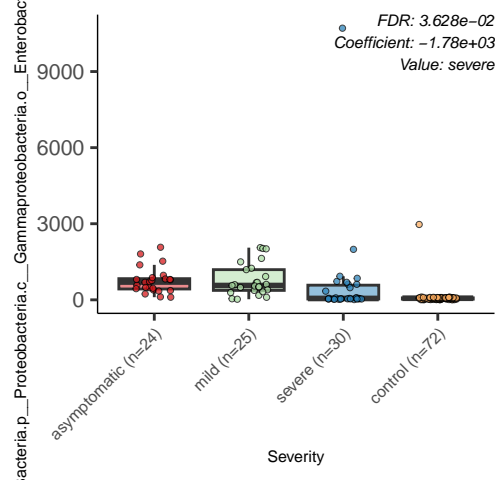

Gammaaproteobacteria.o\_\_Pseudomonadales.f\_\_Pseudomonada

FDR:  $3.628e-02$   
Coefficient:  $-2.74e+02$   
Value: mild

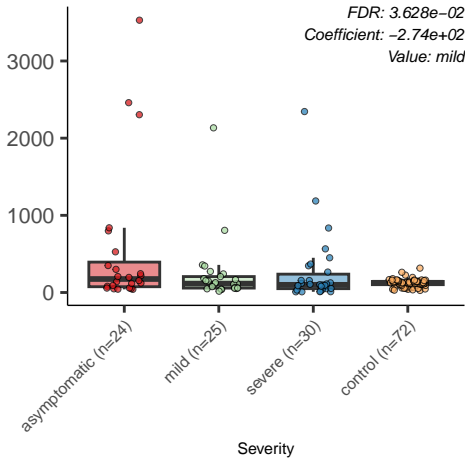

inobacteria.c\_Actinomycetia.o\_Actinomycetales.f\_Actinomycetia

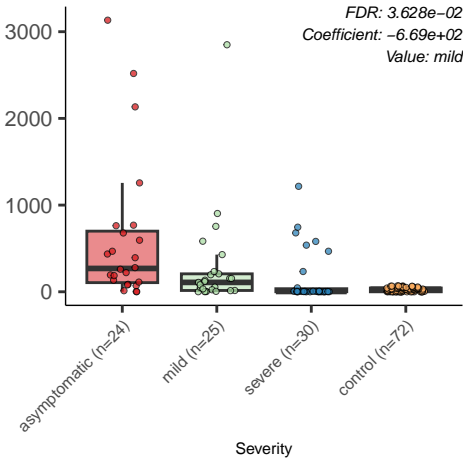

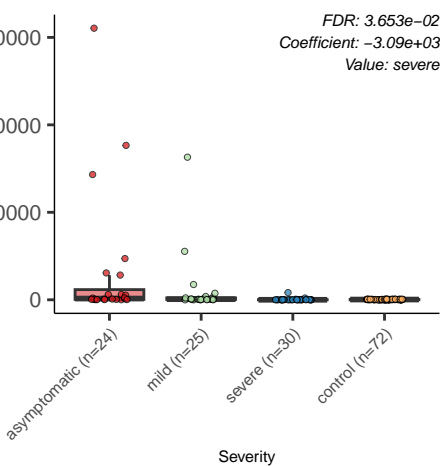

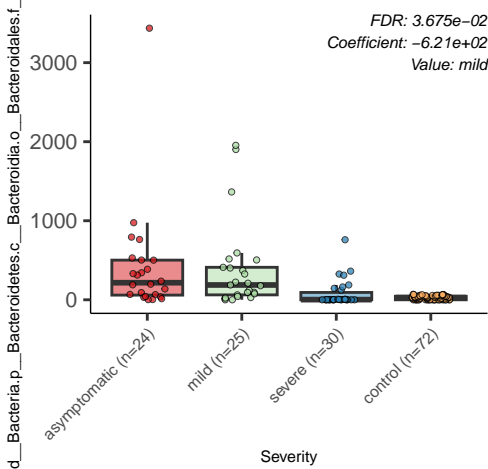

acteria.p\_Bacteroidetes.c\_Bacteroidia.o\_Bacteroidales.f\_Paludib

*FDR: 3.675e-02*  
*Coefficient: -6.21e+02*  
*Value: mild*

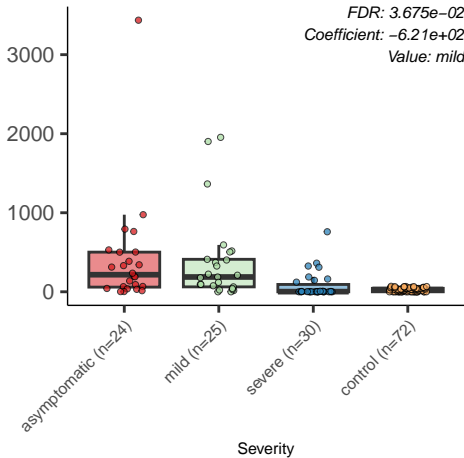



idetes.c\_Bacteroidia.o\_Bacteroidales.f\_Paludibacteraceae.g

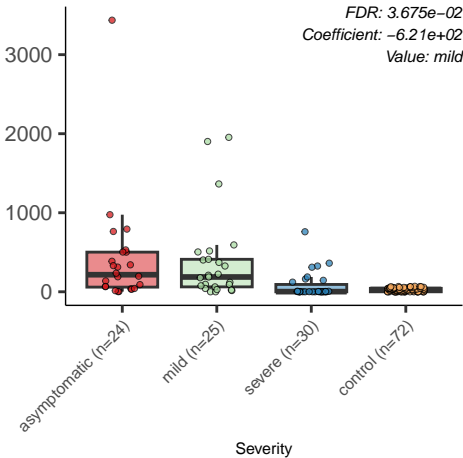

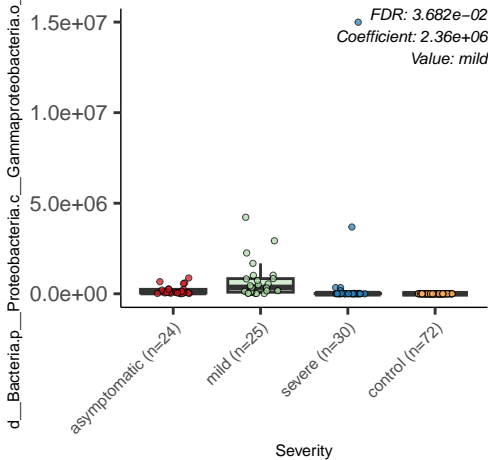

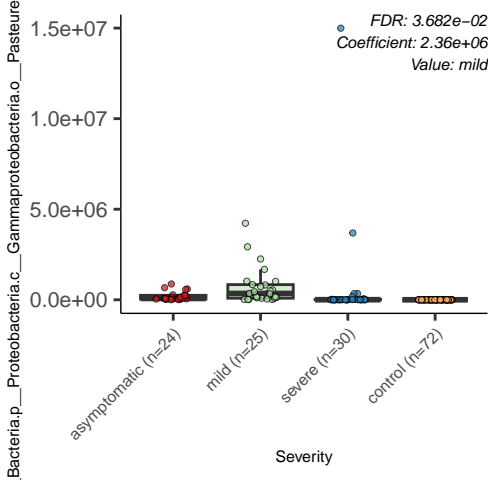

eria.p\_\_Proteobacteria.c\_\_Gammaproteobacteria.o\_\_Xanthomonas

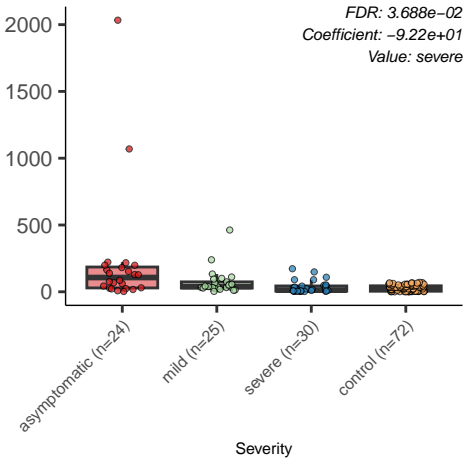

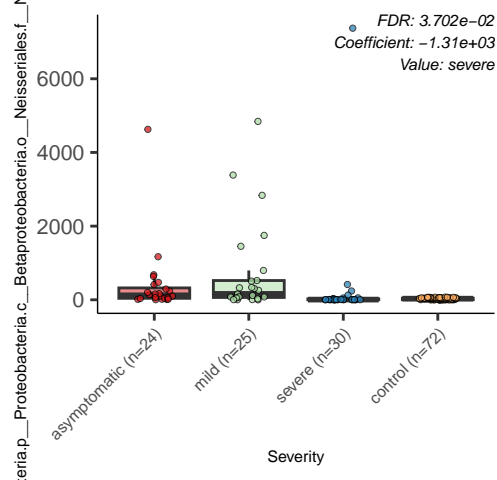

teobacteria.c\_\_Betaproteobacteria.o\_\_Neisseriales.f\_\_Neisseriaceae

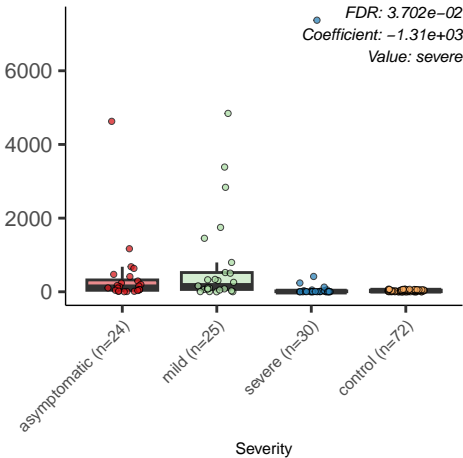

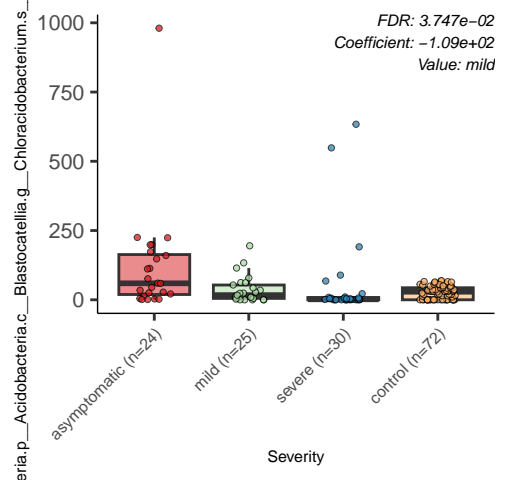

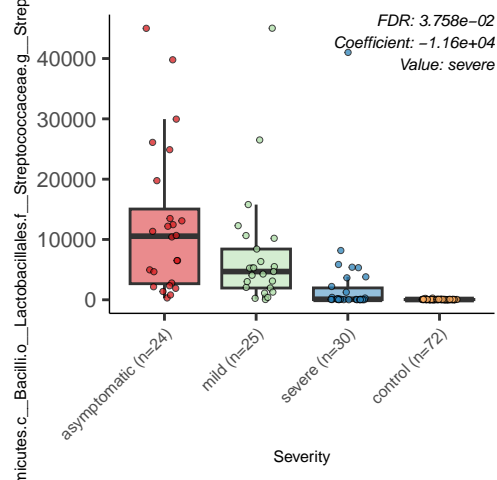



acteria.c\_\_Deltaproteobacteria.o\_\_Desulfobacterales.f\_\_Desulfobulba

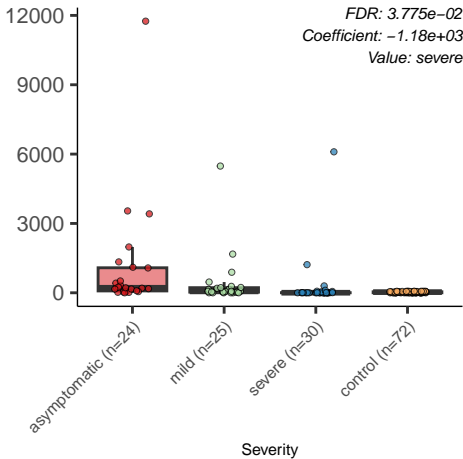

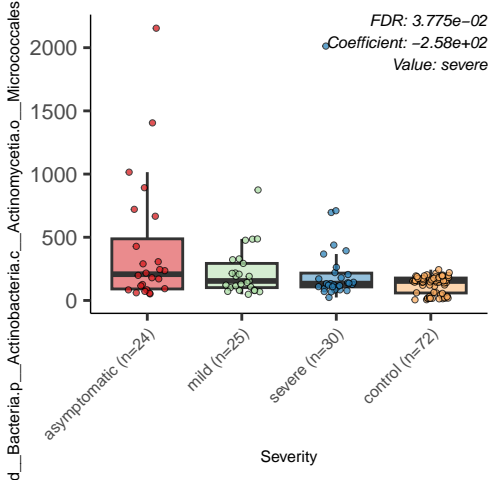

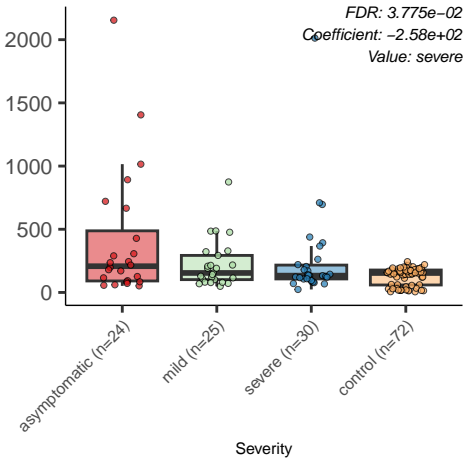

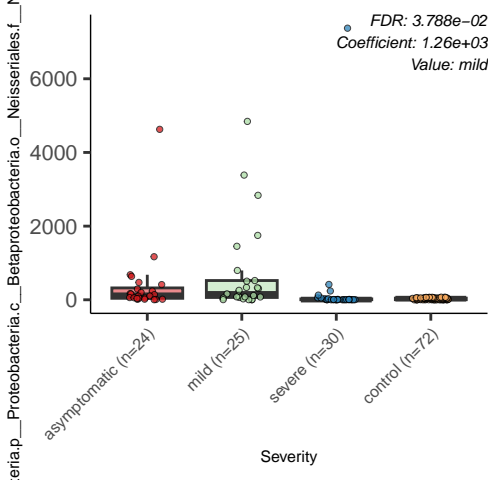

teobacteria.c\_\_Betaproteobacteria.o\_\_Neisseriales.f\_\_Neisseriaceae

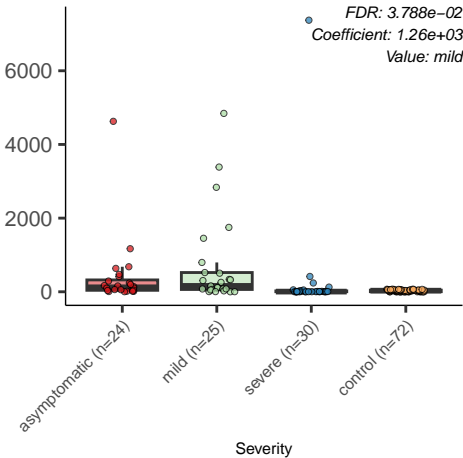

eria.p\_Firmicutes.c\_Clostridia.o\_Eubacteriales.f\_Lachnospiraceae

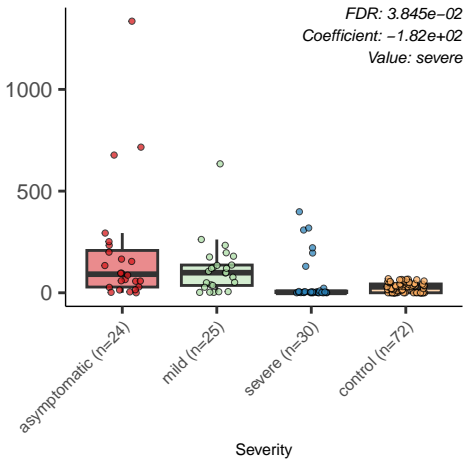

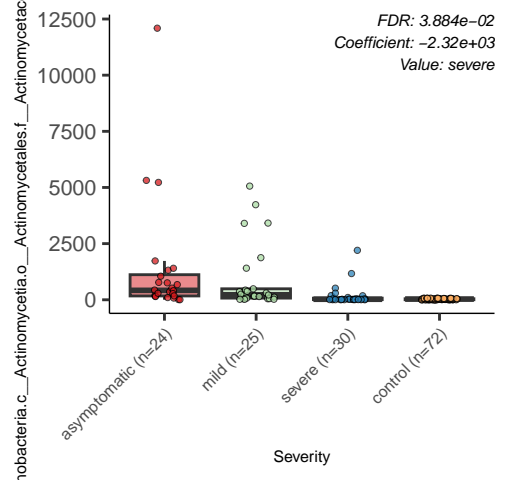

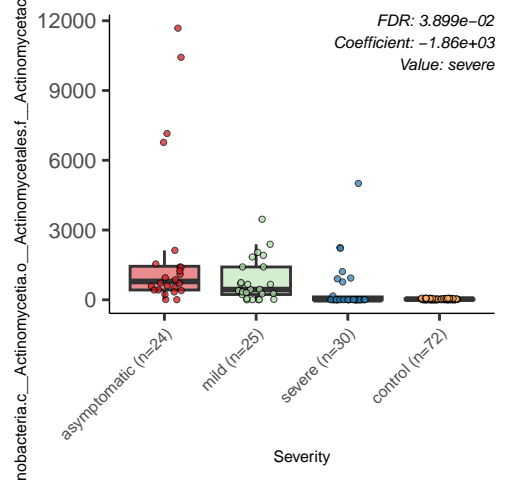



eria.c\_\_Gammaproteobacteria.o\_\_Pasteurellales.f\_\_Pasteurellaceae

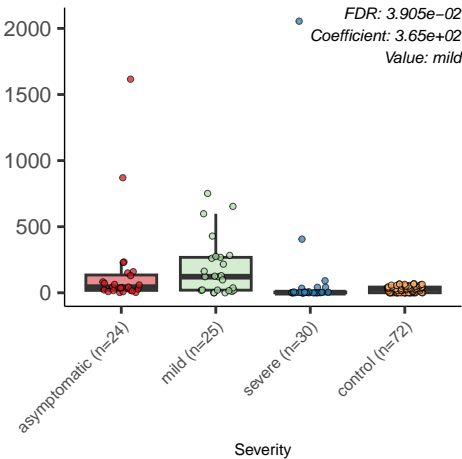

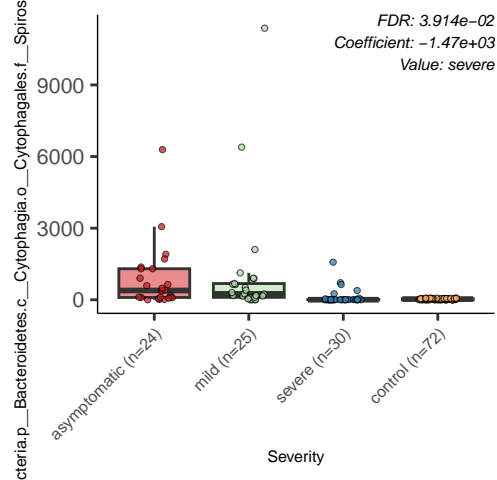

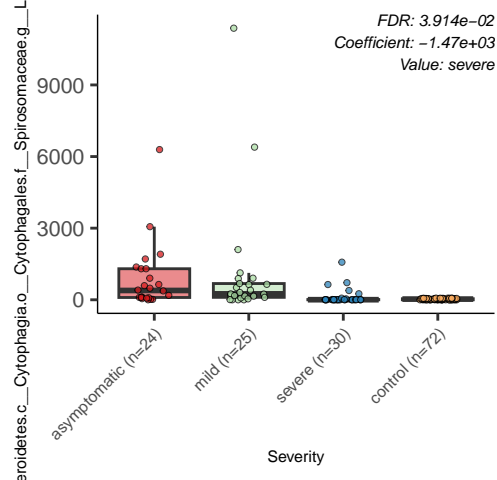

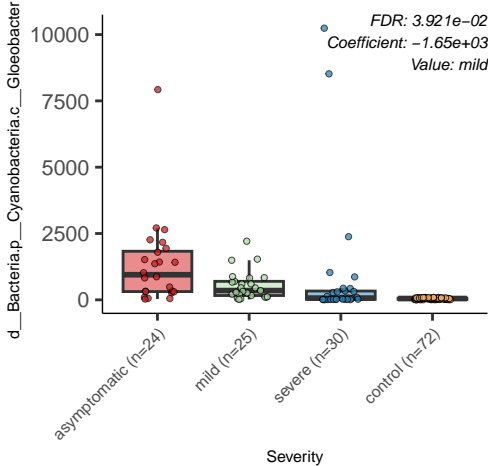

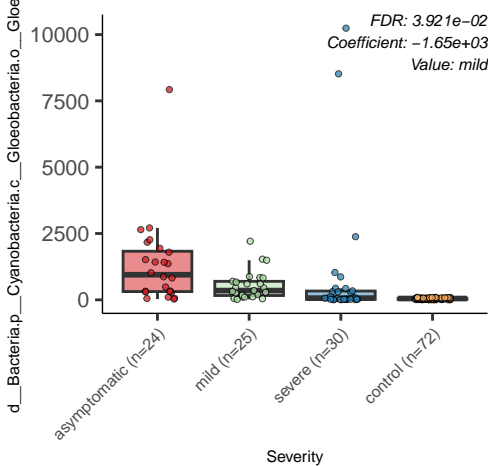

Bacteria.p\_\_Cyanobacteria.c\_\_Gloeobacteria.o\_\_Gloeobacteriales

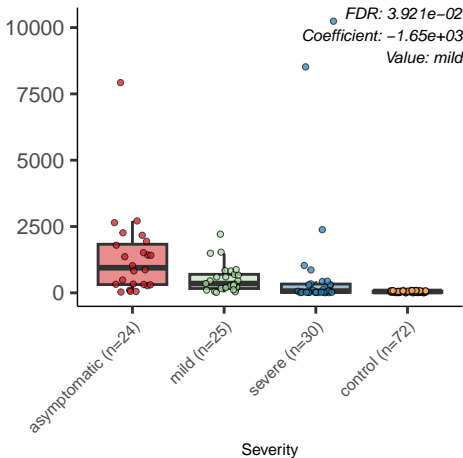

Proteobacteria.c\_\_Gammaproteobacteria.o\_\_Pasteurellales.f\_\_P

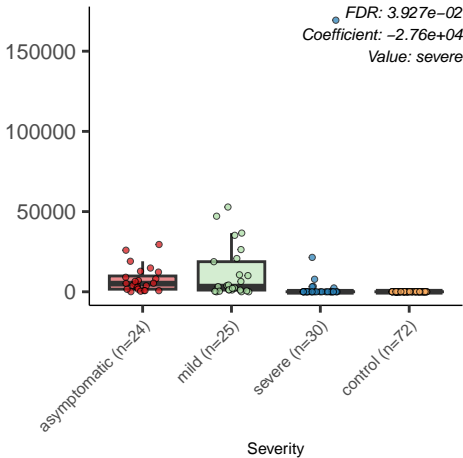

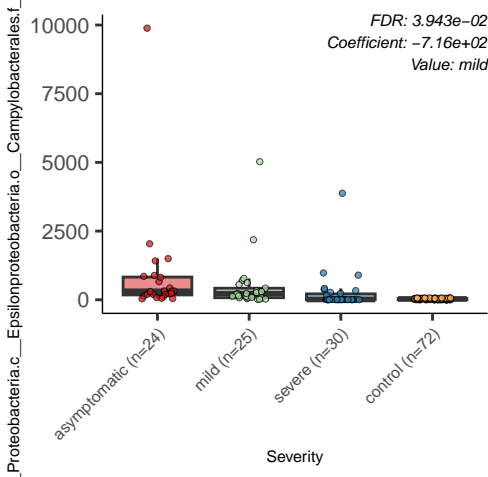



d\_Bacteria.p\_\_Planctomycetes.c\_\_Planctomycetia.o\_\_Pirellula

FDR:  $3.971e-02$   
Coefficient:  $-5.52e+02$   
Value: mild

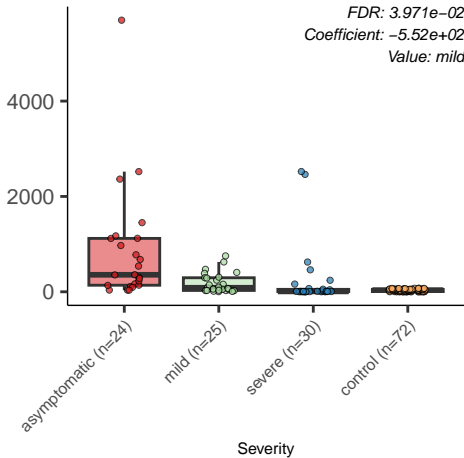

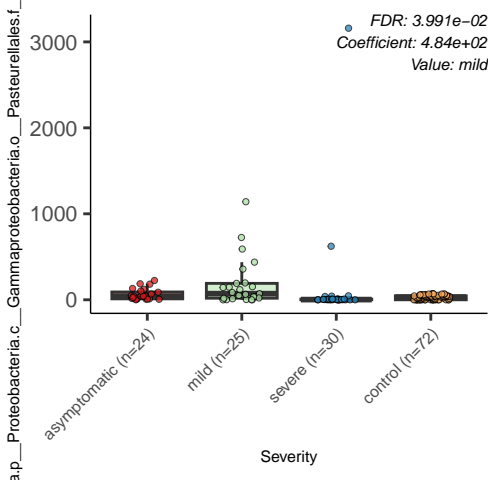

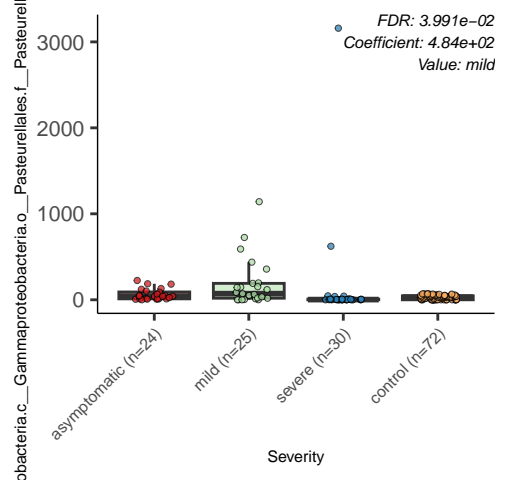

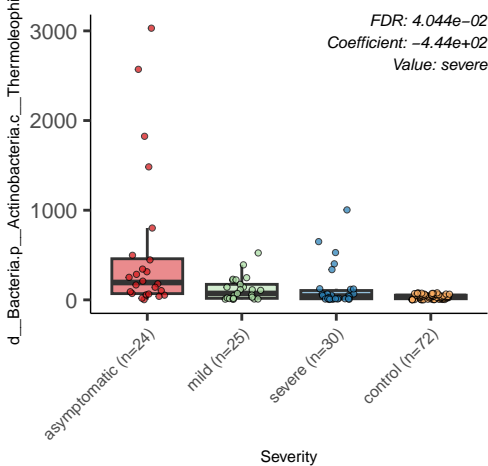

ria.p\_\_Proteobacteria.c\_\_Gammaproteobacteria.o\_\_Enterobactera

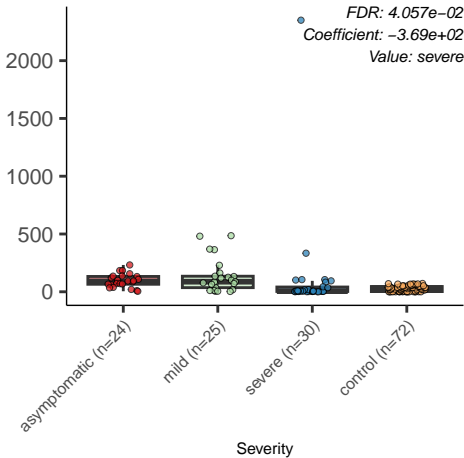

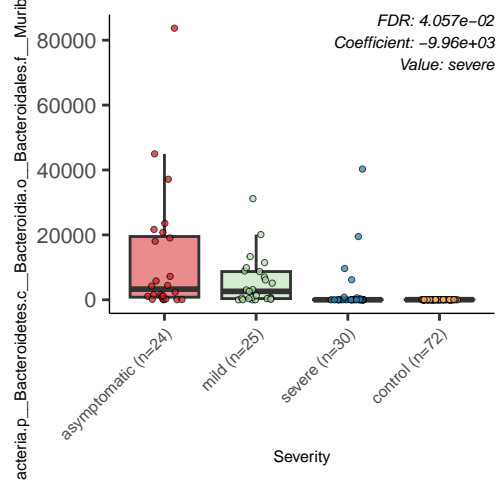

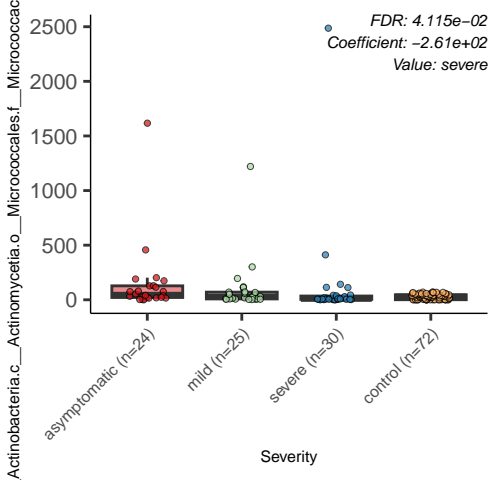

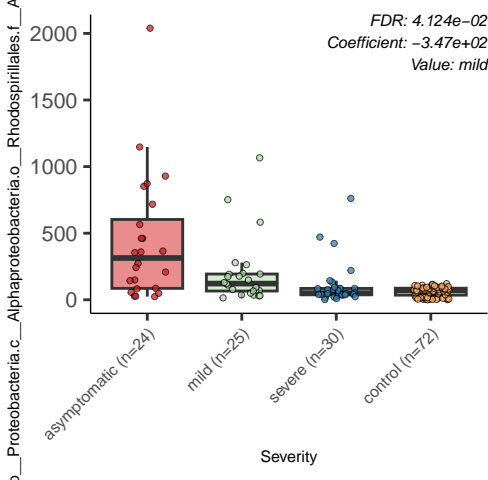



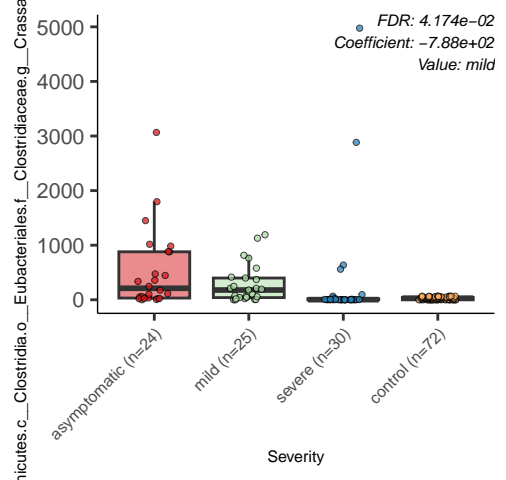

ria.p\_\_Firmicutes.c\_\_Erysipelotrichia.o\_\_Erysipelotrichales.f\_\_Erys

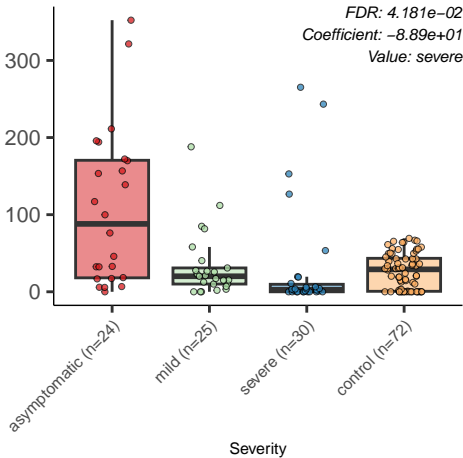

acteria.p\_\_Proteobacteria.c\_\_Gammaproteobacteria.o\_\_Aeromona

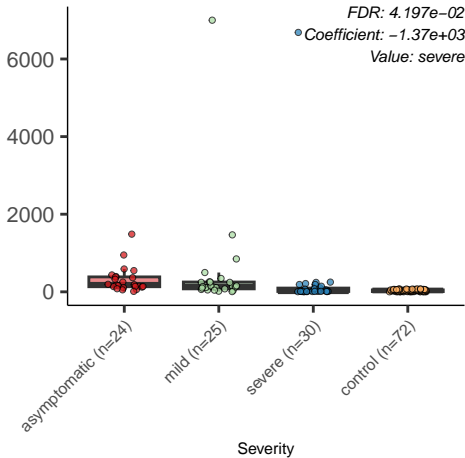

nicutes.c\_\_Bacilli.o\_\_Lactobacillales.f\_\_Streptococcaceae.g\_\_Strep

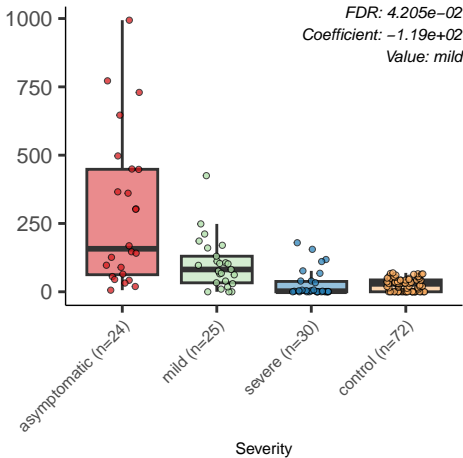

Bacteria.p\_Firmicutes.c\_Bacilli.o\_Bacillales.f\_Alicyclobacillao

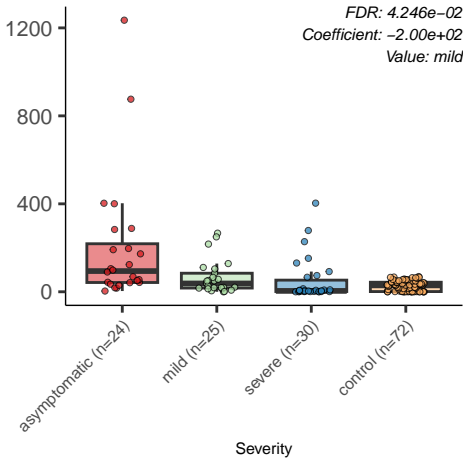

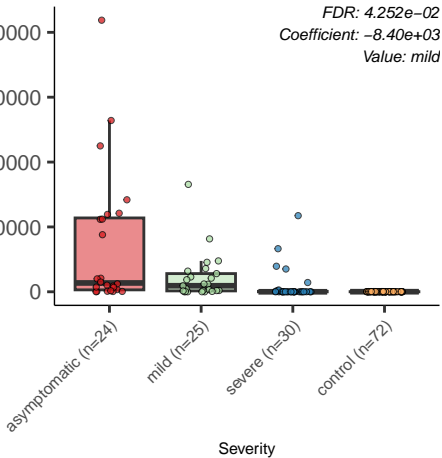

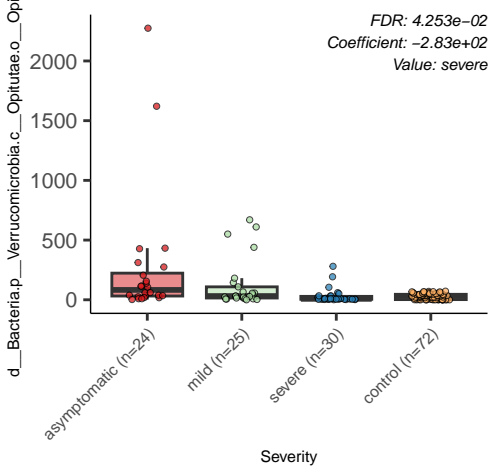

d\_Bacteria.p\_Verrucomicrobia.c\_Opitutae.o\_Opitutales.t

FDR:  $4.253e-02$   
Coefficient:  $-2.83e+02$   
Value: severe

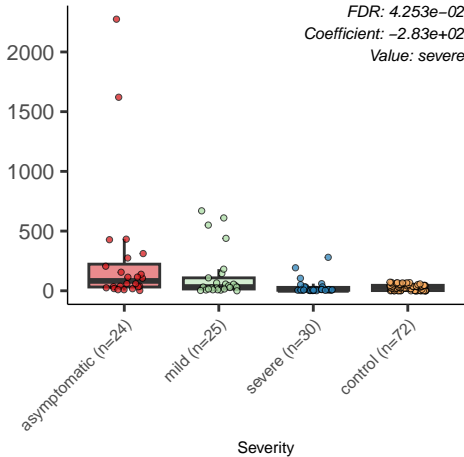



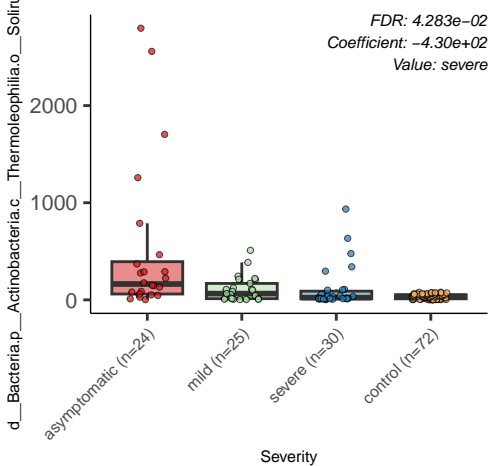

irmicutes.c\_\_Tissierellia.o\_\_Tissierellales.f\_\_Peptoniphilaceae.g\_\_A

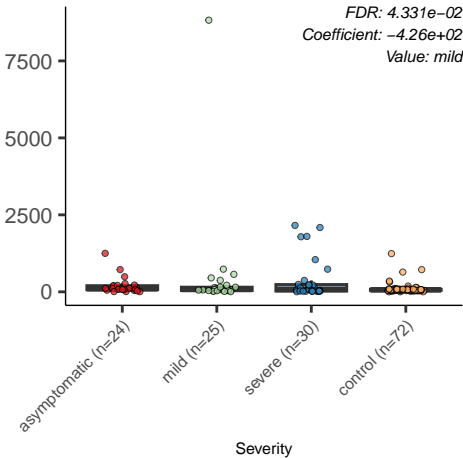

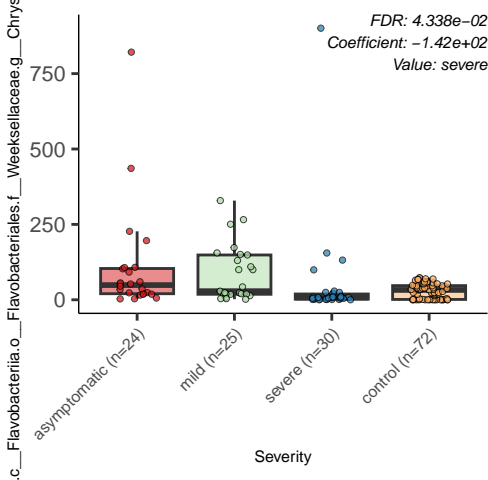

Actinomyces

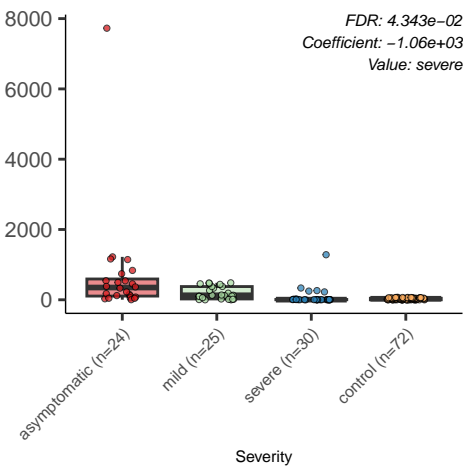

Bacteria.p\_Firmicutes.c\_Clostridia.o\_Eubacteriales.f\_Lachno

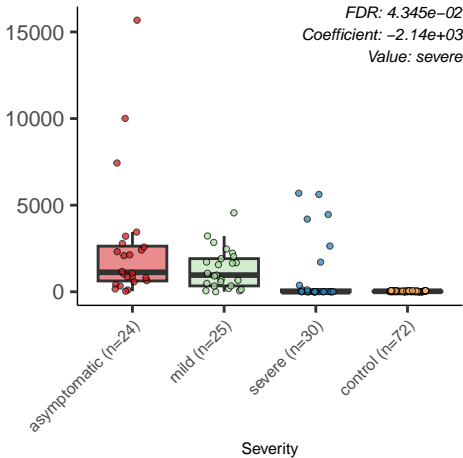

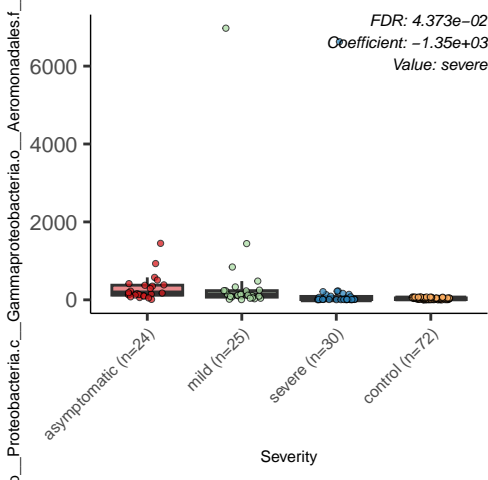

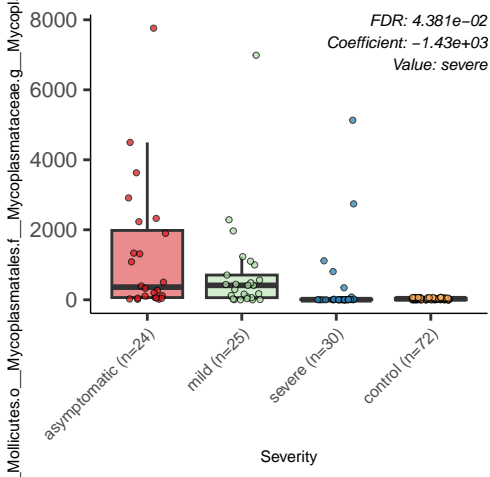

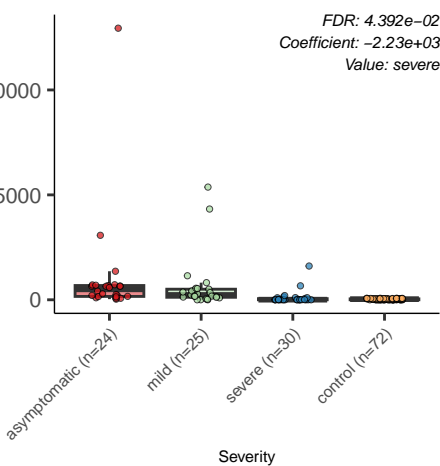



irmicutes.c\_\_Clostridia.o\_\_Thermoanaerobacterales.f\_\_Thermoana

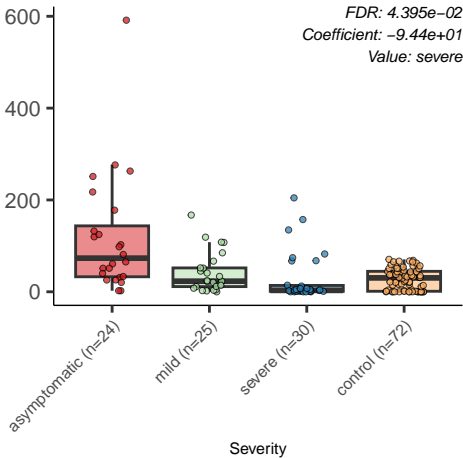

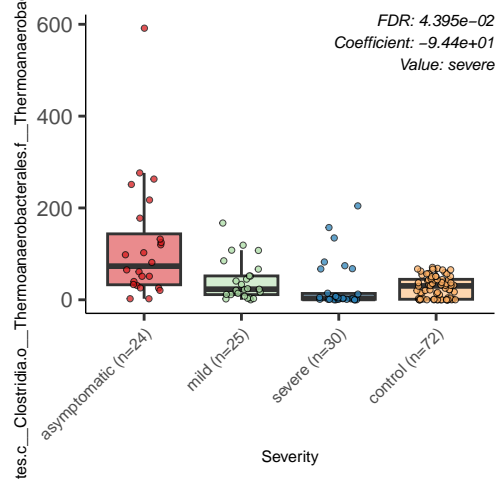

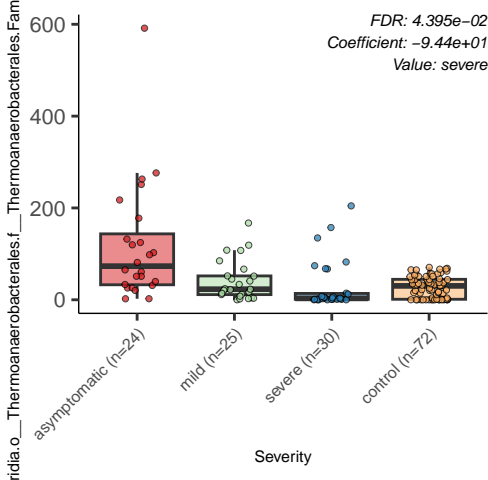

Proteobacteria.c\_\_Epsilonproteobacteria.o\_\_Campylobacter

FDR:  $4.399\text{e-}02$   
Coefficient:  $-7.07\text{e}+02$   
Value: mild

15000

10000

5000

0

asymptomatic (n=24)

mild (n=25)

severe (n=30)

control (n=72)

Severity

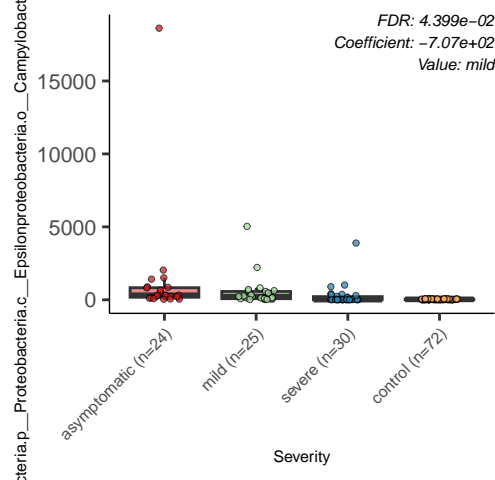

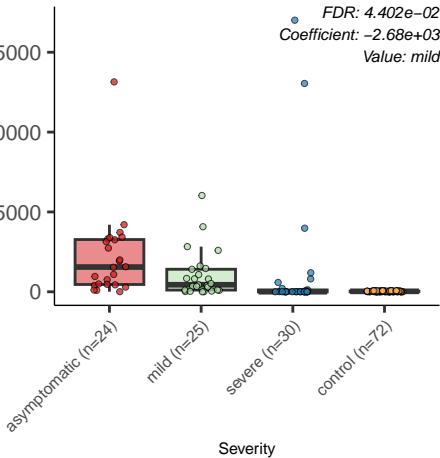

rochaetes.c\_\_Spirochaetia.o\_\_Spirochaetales.f\_\_Treponemataceae.g

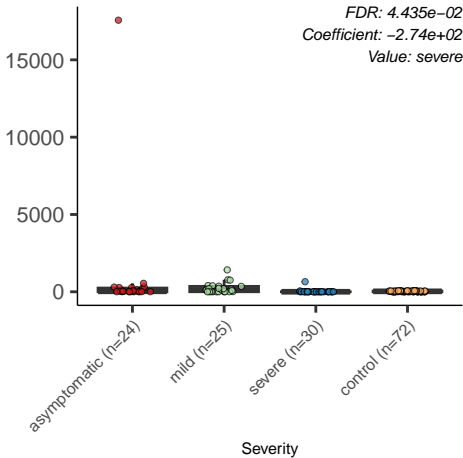

Bacteria.p\_\_Bacteroidetes.c\_\_Flavobacteriia.o\_\_Flavobacteriales

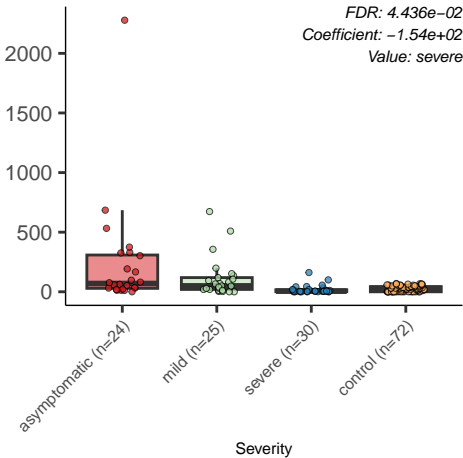

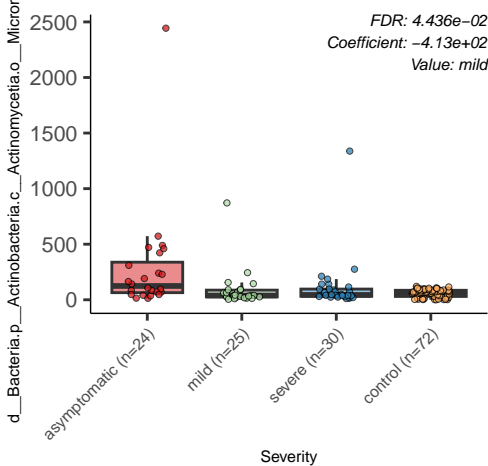



bacteria.p\_Actinobacteria.c\_Actinomycetia.o\_Micromonosporales

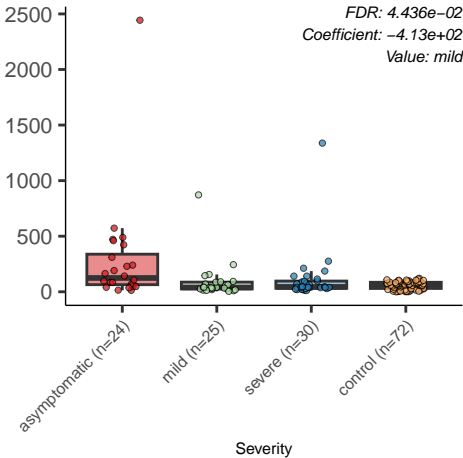

bacteria.p\_\_Synergistetes.c\_\_Synergistia.o\_\_Synergistales.f\_\_Synergistaceae

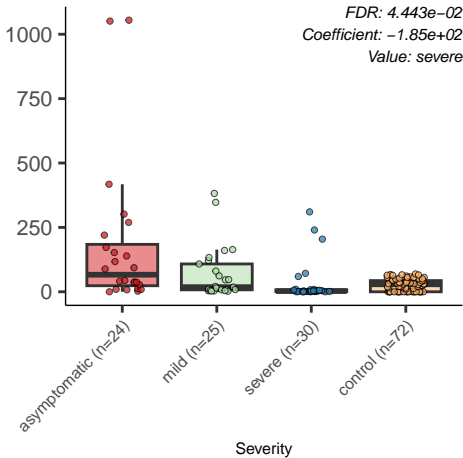

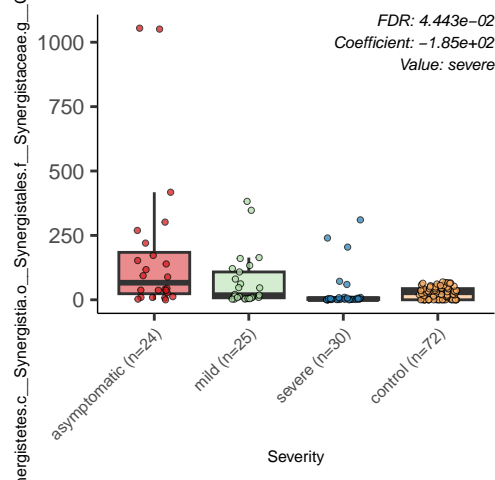

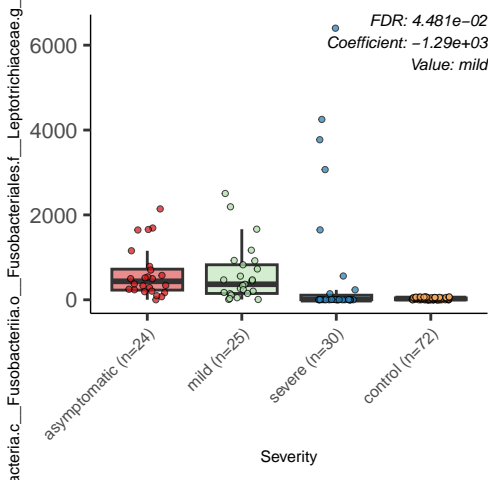

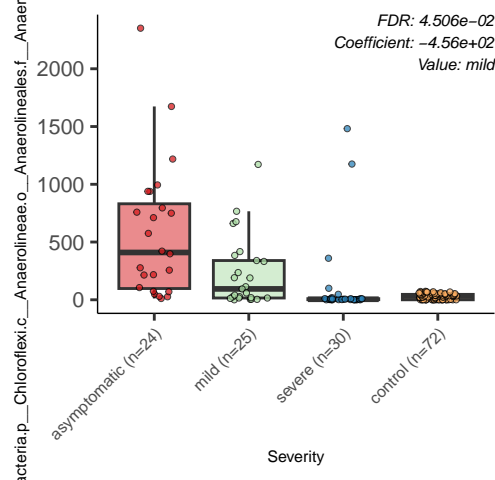

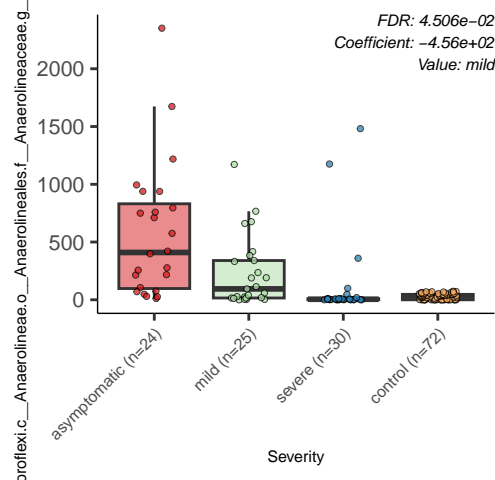

Firmicutes.c\_\_Clostridia.o\_\_Eubacteriales.f\_\_Clostridiaceae.g\_\_C

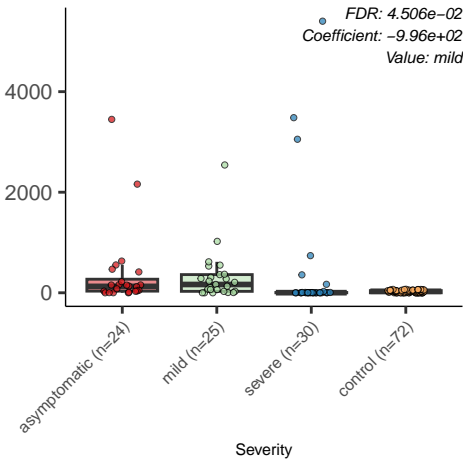

Bacteria.p\_Firmicutes.c\_Clostridia.o\_Eubacteriales.f\_Lachnosp

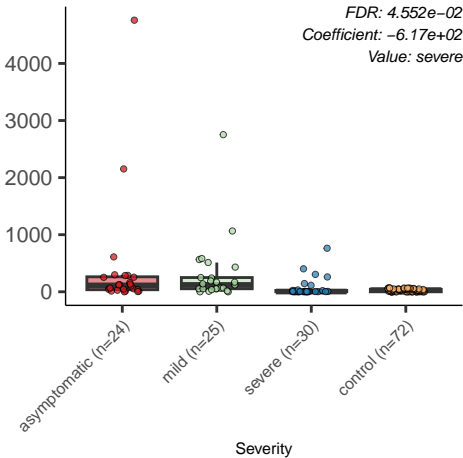



.p\_\_Proteobacteria.c\_\_Betaproteobacteria.o\_\_Burkholderiales.f\_\_B

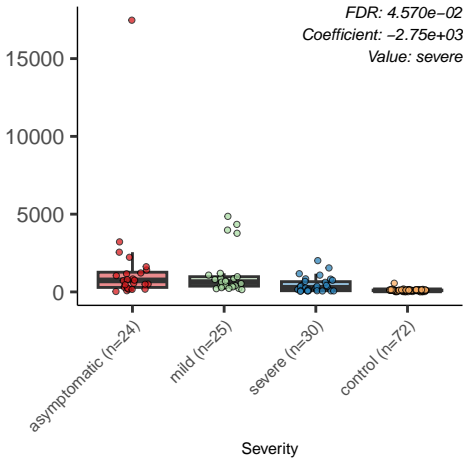

d\_Bacteria.p\_Bacteroidetes.c\_Chitinophagii

FDR:  $4.575e-02$   
Coefficient:  $-9.14e+02$   
Value: mild

4000  
2000  
0

asymptomatic (n=24)

mild (n=25)

severe (n=30)

control (n=72)

Severity

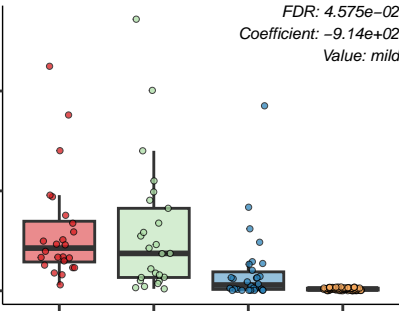

d\_Bacteria.p\_Bacteroidetes.c\_Chitinophagia.o\_Chitin

FDR:  $4.575e-02$   
Coefficient:  $-9.14e+02$   
Value: mild

4000  
2000  
0

asymptomatic (n=24)

mild (n=25)

severe (n=30)

control (n=72)

Severity

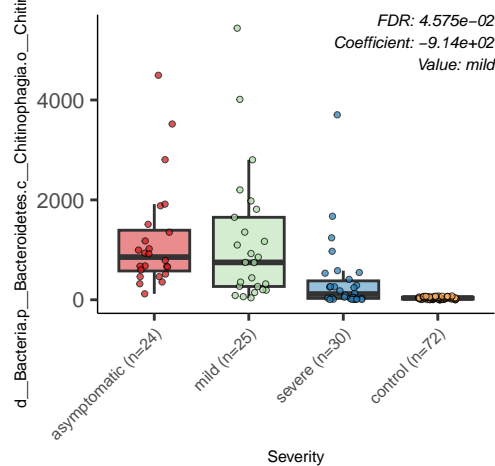

4\_Bacteria.p\_Bacteroidetes.c\_Chitinophagia.o\_Chitinophagales

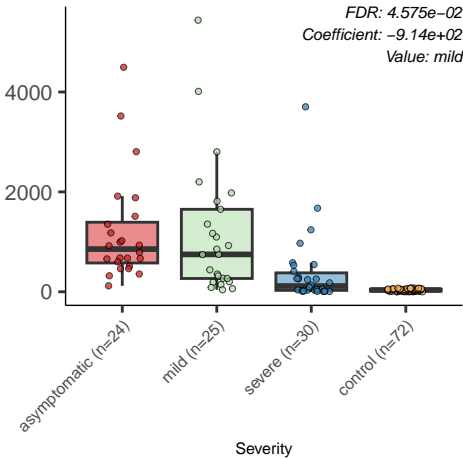

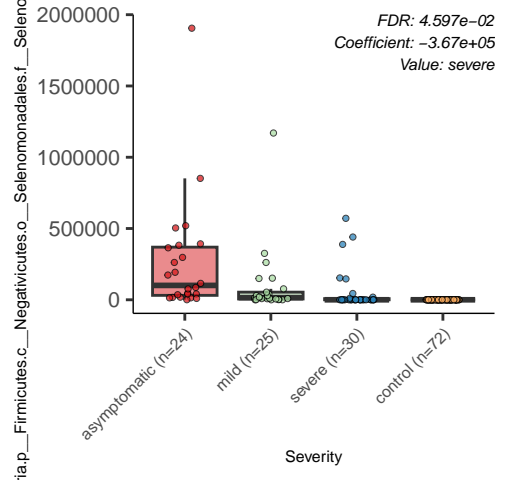

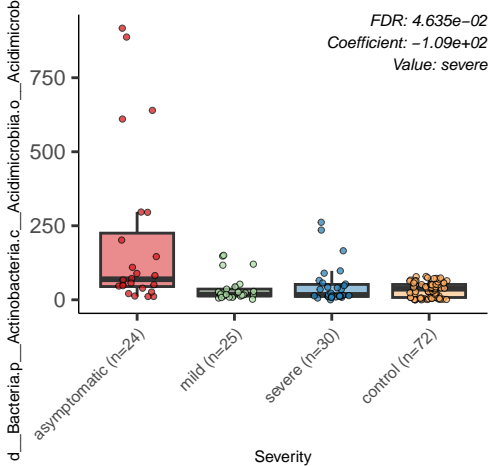

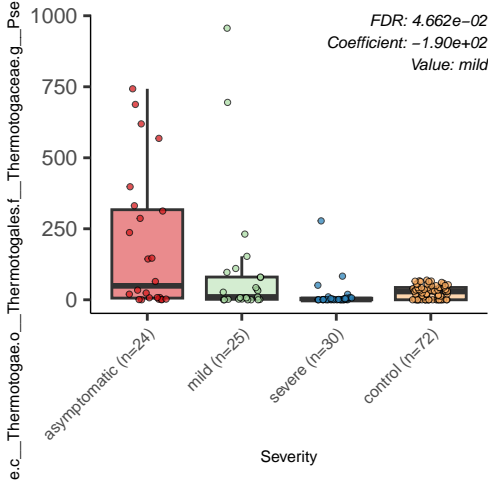

c\_\_Gammaproteobacteria.o\_\_Enterobacterales.f\_\_Bruguierivoraca

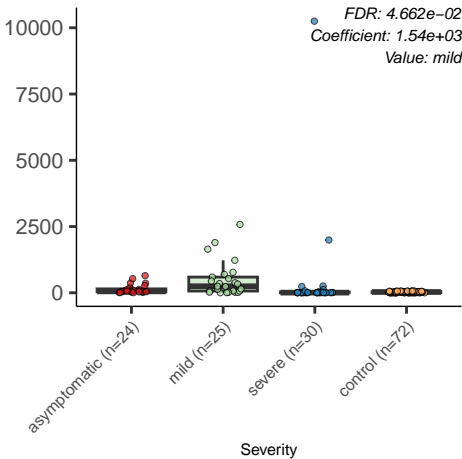



Firmicutes.c\_\_Clostridia.o\_\_Eubacteriales.f\_\_Lachnospiraceae.g

*FDR: 4.694e-02*  
*Coefficient: -6.15e+02*  
*Value: severe*

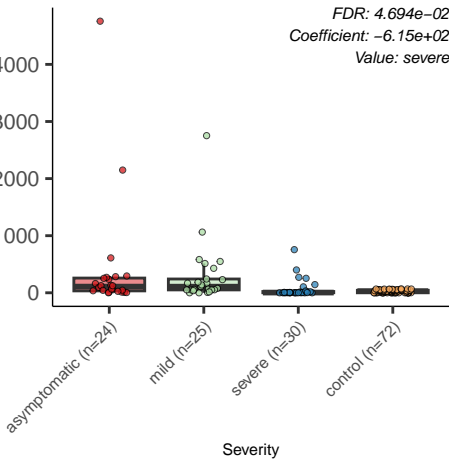

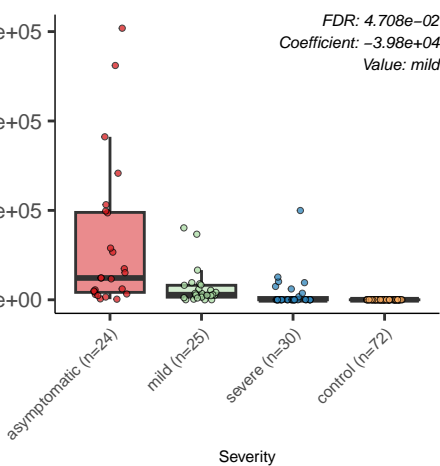

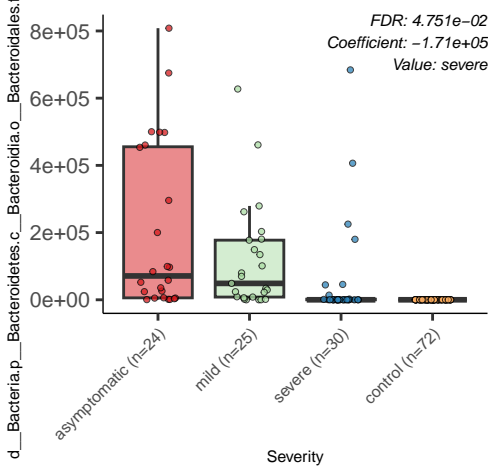

utes.c\_\_Tissierellia.o\_\_Tissierellales.f\_\_Peptoniphilaceae.g\_\_Anaer

FDR:  $4.751e-02$   
Coefficient:  $-7.79e+02$   
Value: severe

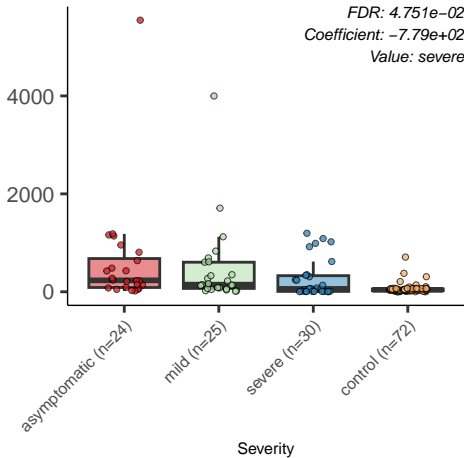

l\_Bacteria.p\_Firmicutes.c\_Negativicutes.o\_\_Selenomonadales.f

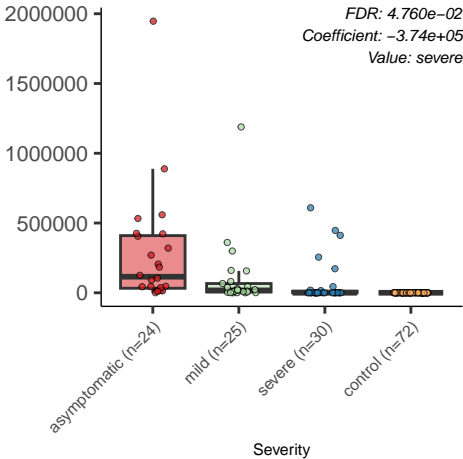

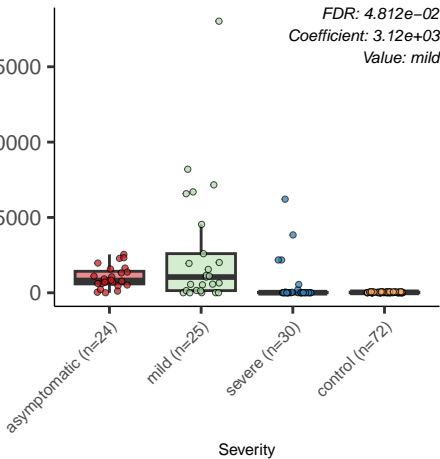

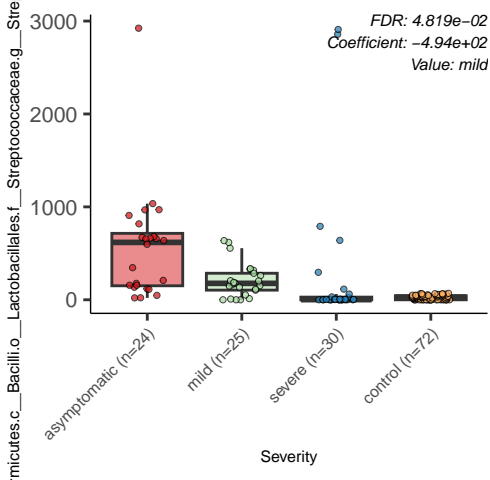

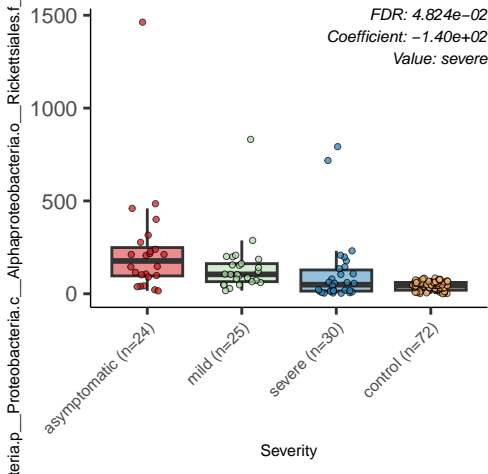



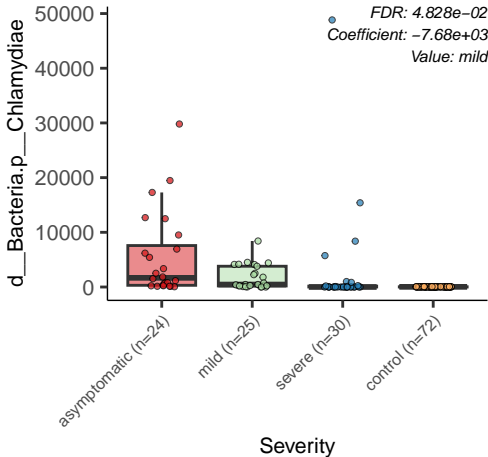

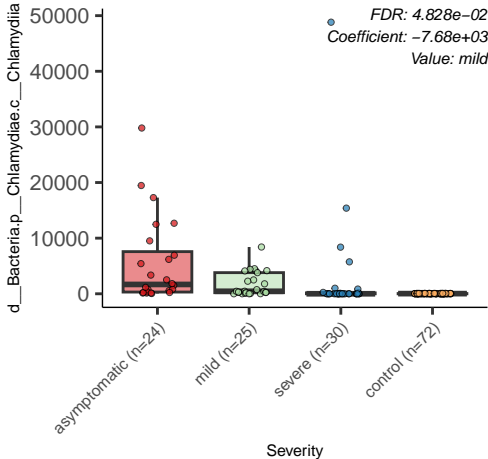

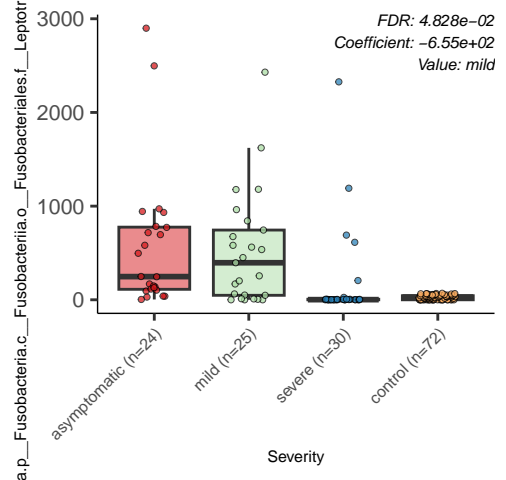

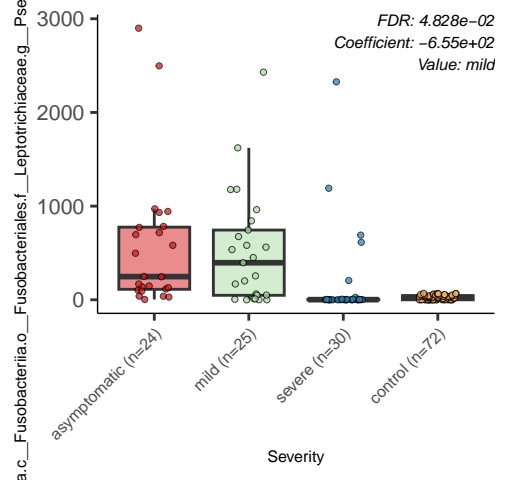

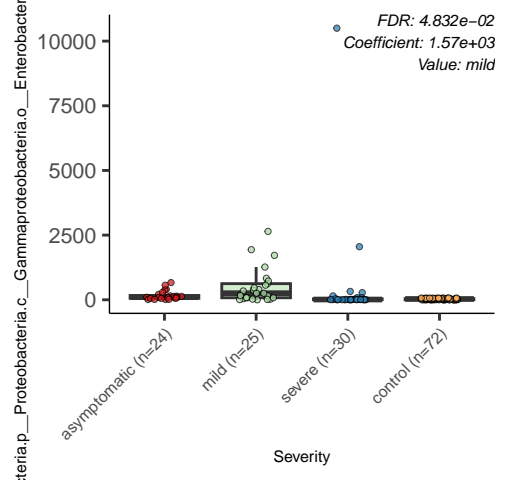

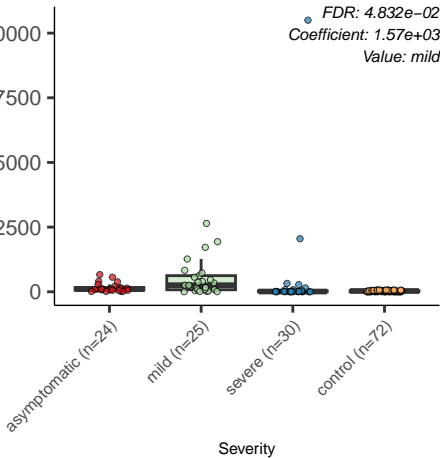

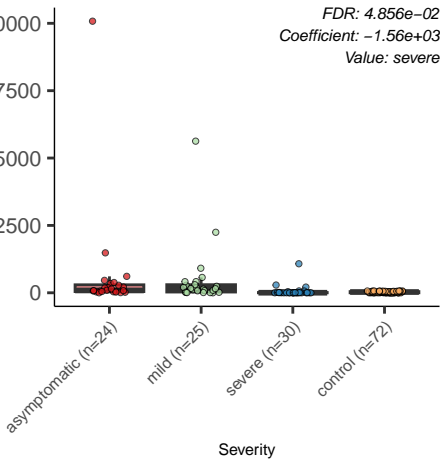

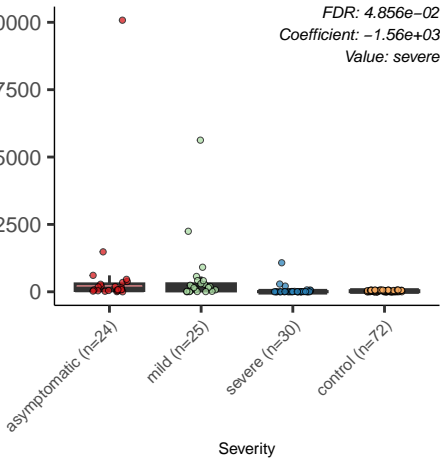



Firmicutes.c\_Clostridia.o\_Eubacteriales.f\_Clostridiaceae.g\_C

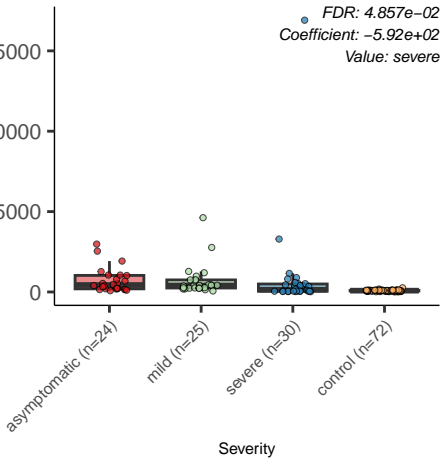

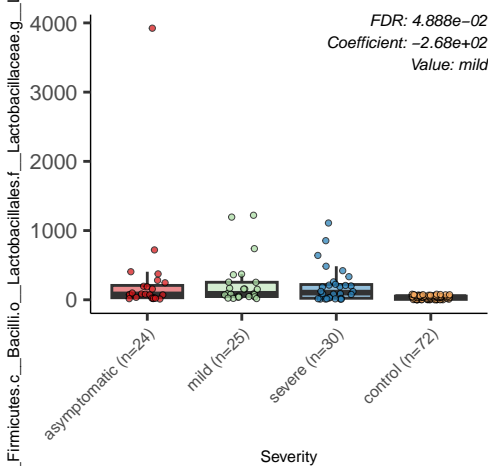

eria.c\_\_Gammaproteobacteria.o\_\_Pasteurellales.f\_\_Pasteurellaceae

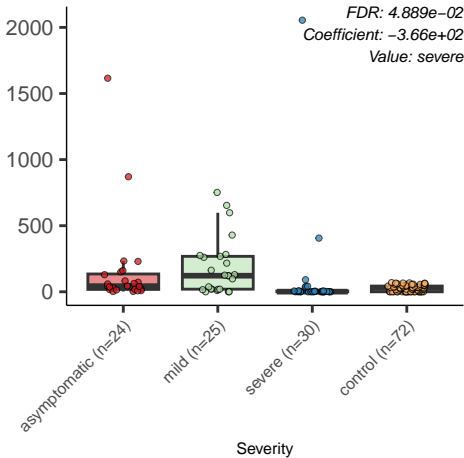

rmicutes.c\_\_Bacilli.o\_\_Lactobacillales.f\_\_Lactobacillaceae.g\_\_Lact

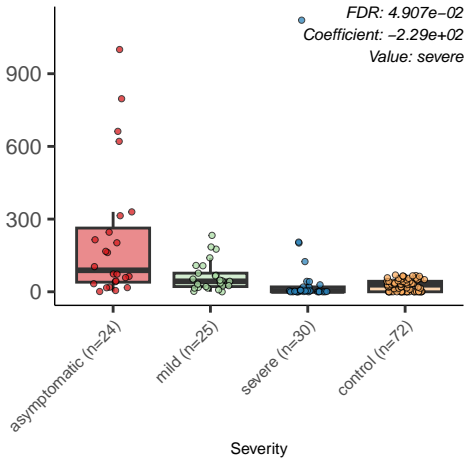

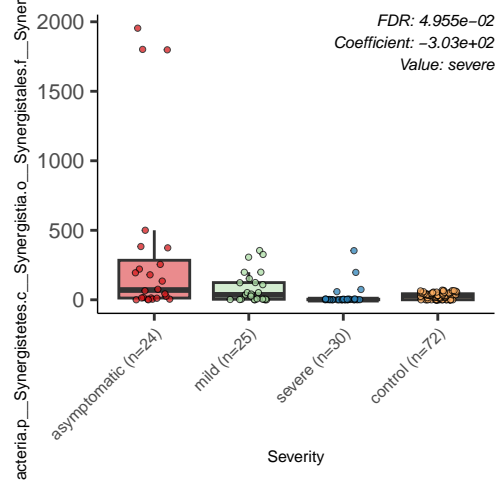

Synergistetes.c\_\_Synergistia.o\_\_Synergistales.f\_\_Synergistaceae.g

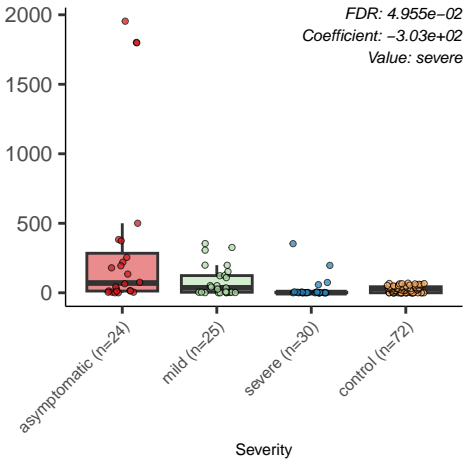

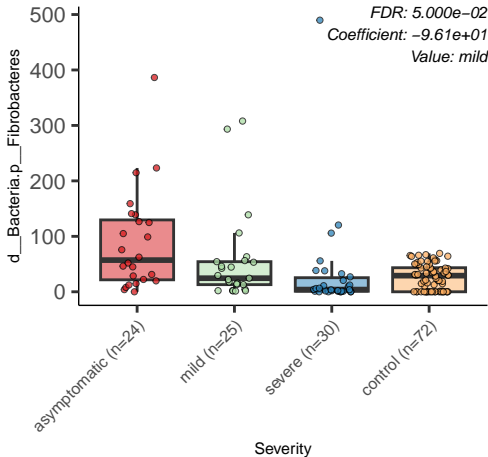

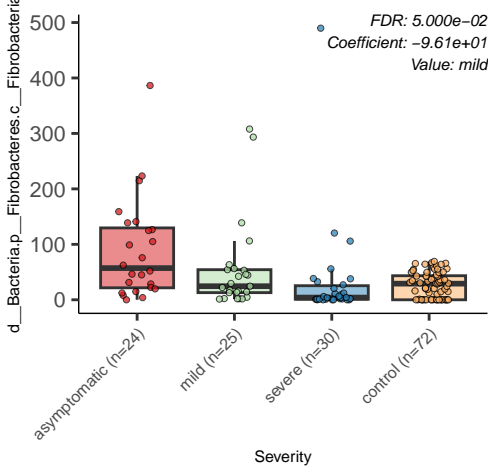



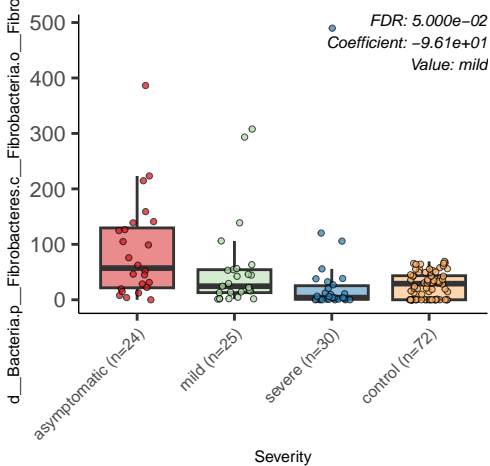

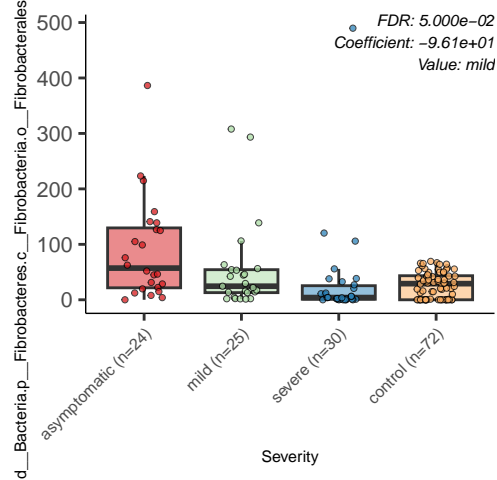

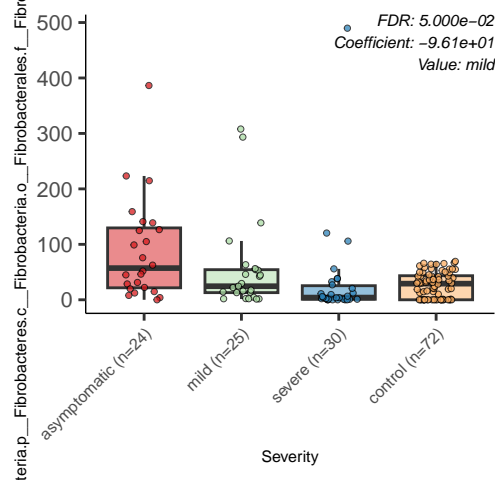

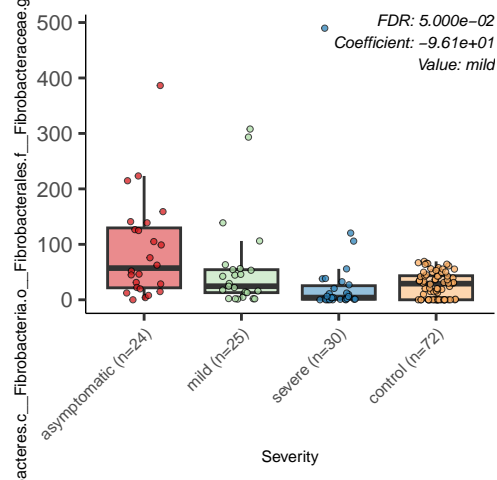

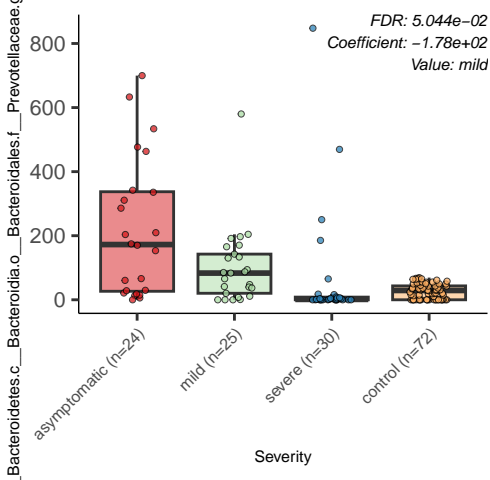

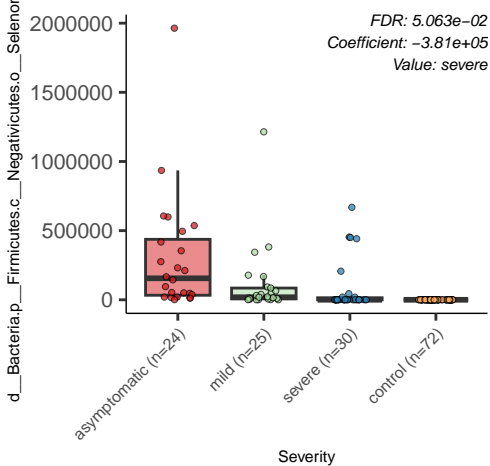

d\_\_Bacteria.p\_Actinobacteria.c\_Acidimicrobi

FDR:  $5.120e-02$   
Coefficient:  $-2.02e+02$   
Value: severe

1000  
500  
0

asymptomatic (n=24)

mild (n=25)

severe (n=30)

control (n=72)

Severity

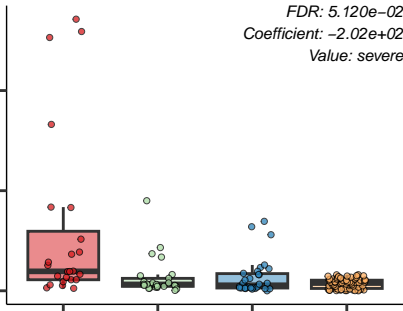

d\_Bacteria.p\_Actinobacteria.c\_Acidimicrobiia.o\_Acid

1000

500

0

FDR: 5.120e-02

Coefficient: -2.02e+02

Value: severe

asymptomatic (n=24)

mild (n=25)

severe (n=30)

control (n=72)

Severity

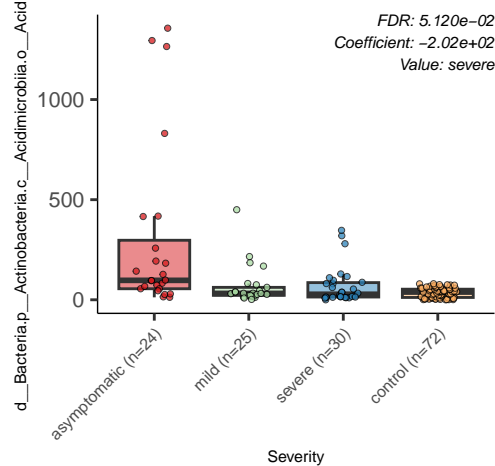



Flavobacteriales.f\_Fla  
Bacteroidetes.c\_Flavobacteriia.o\_Flavobacteriales.f\_Fla  
Bacteroidetes.c\_Flavobacteriia.o\_Flavobacteriales.f\_Fla

*FDR: 5.138e-02*  
*Coefficient: -1.38e+02*  
*Value: severe*

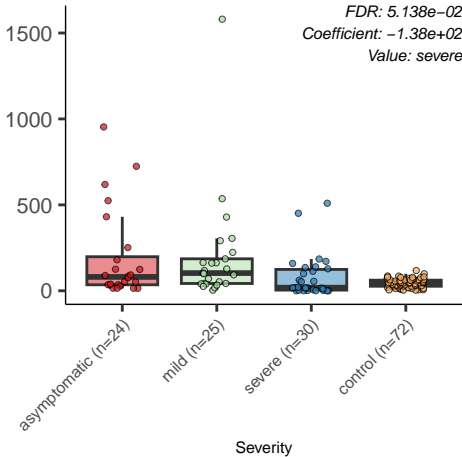

Bacteroidetes.c\_Flavobacteriia.o\_Flavobacteriales.f\_Flavobacter

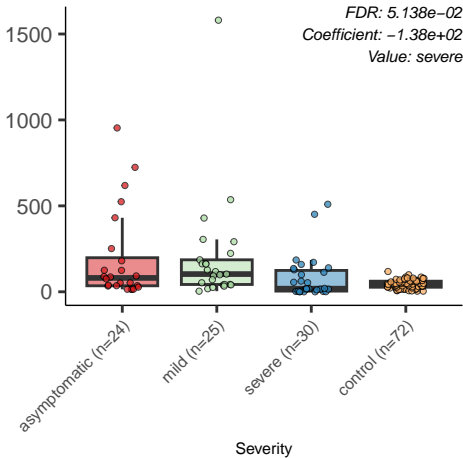

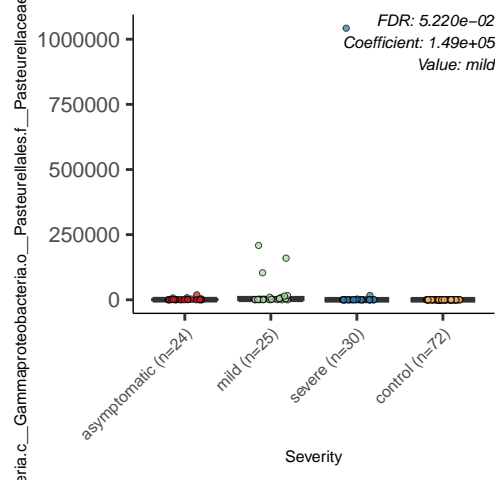

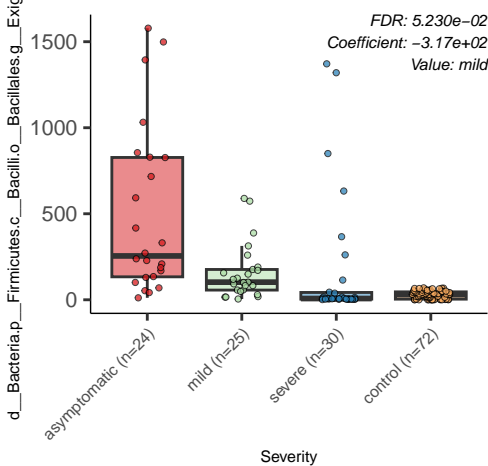

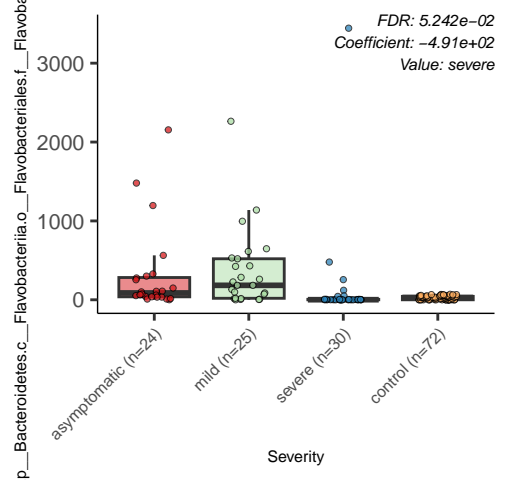

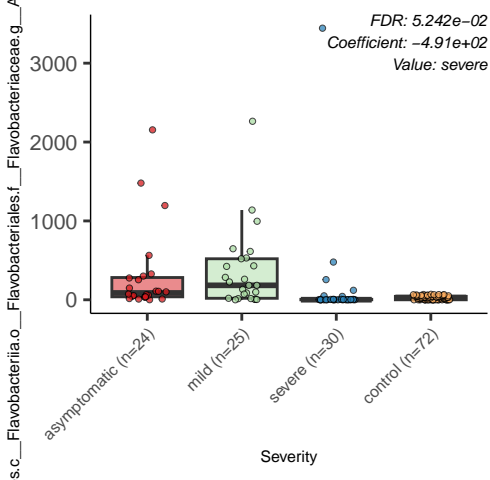

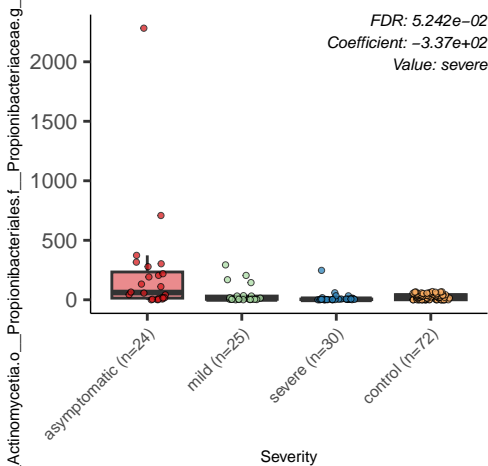

d\_Bacteria.p\_Bacteroidetes.c\_Cytophagia

FDR:  $5.246e-02$   
Coefficient:  $-1.34e+04$   
Value: severe

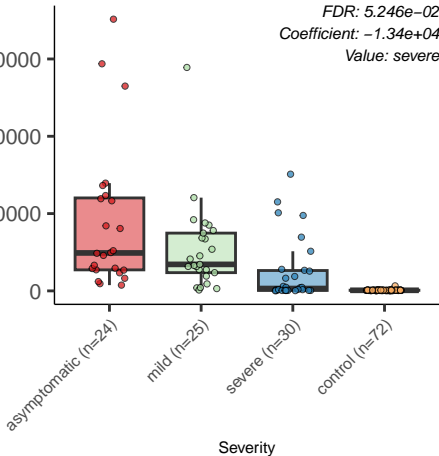



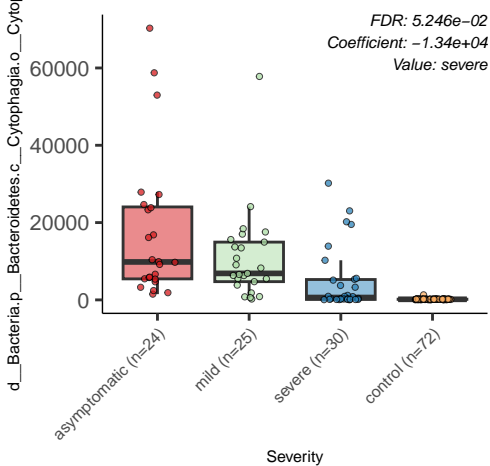

tes.c\_\_Negativicutes.o\_\_Selenomonadales.f\_\_Selenomonadaceae.g\_\_

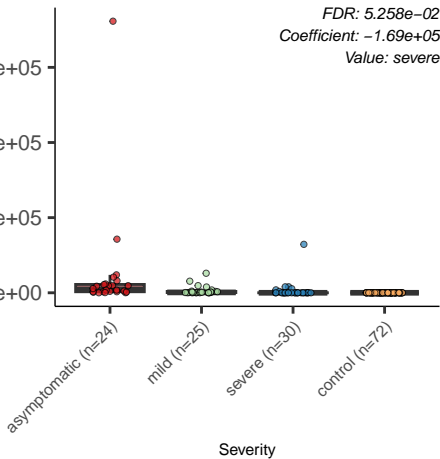

d\_Bacteria.p\_Proteobacteria.c\_Gammaproteobacteria.o\_o

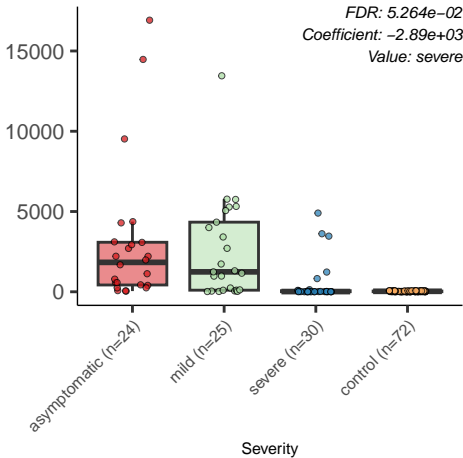

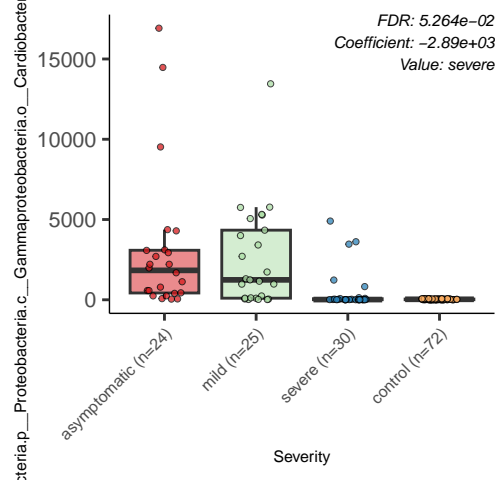

teobacteria.c\_\_Betaproteobacteria.o\_\_Neisseriales.f\_\_Neisseriaceae

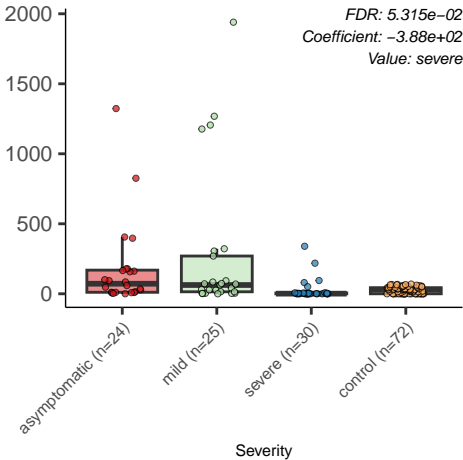

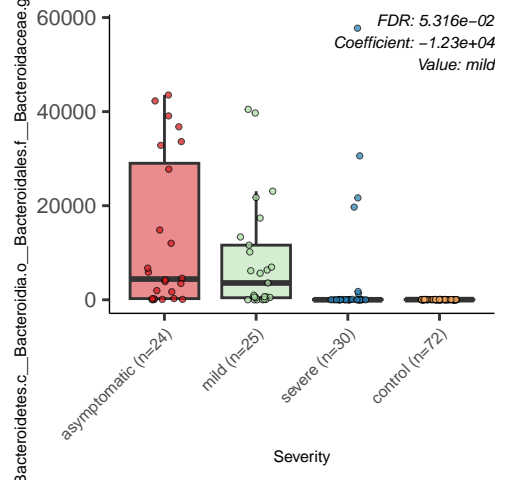

Firmicutes.c\_\_Bacilli.o\_\_Lactobacillales.f\_\_Lactobacillaceae.g\_\_La

FDR: 5.316e-02  
Coefficient: -5.62e+02  
Value: severe

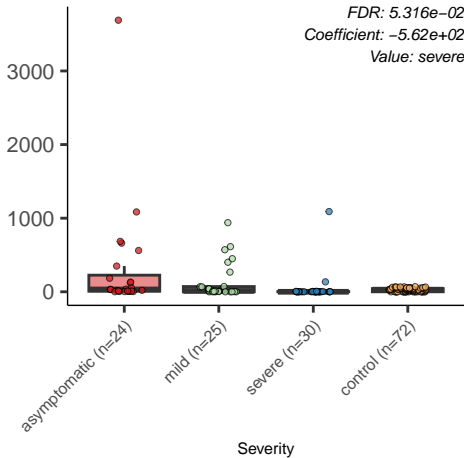

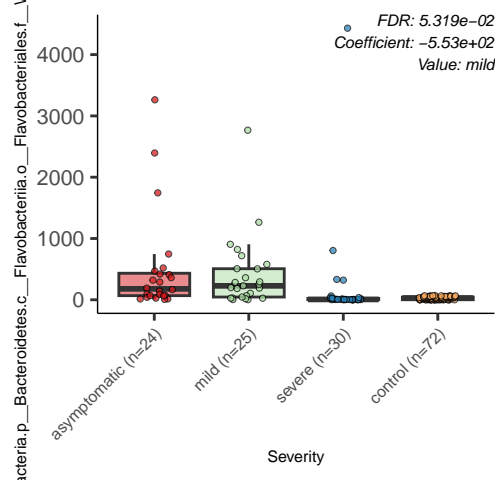



Firmicutes.c\_\_Clostridia.o\_\_Eubacteriales.f\_\_Lachnospiraceae.g

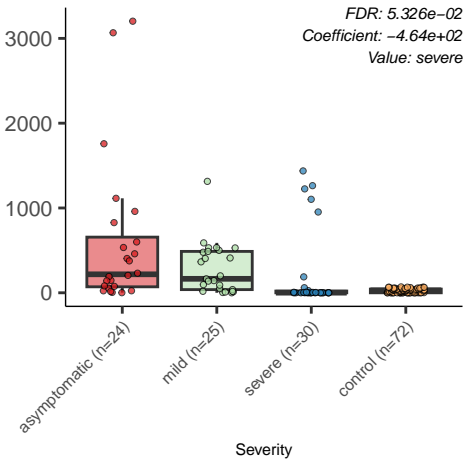

bacteria.p\_\_Bacteroidetes.c\_\_Cytophagia.o\_\_Cytophagales.f\_\_Fulv

*FDR: 5.326e-02*  
*Coefficient: -2.10e+02*  
*Value: mild*

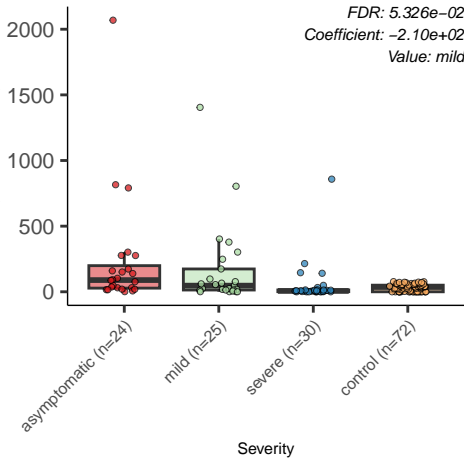

Bacteroidetes.c\_\_Cytophagia.o\_\_Cytophagales.f\_\_Fulvivirgaceae.g

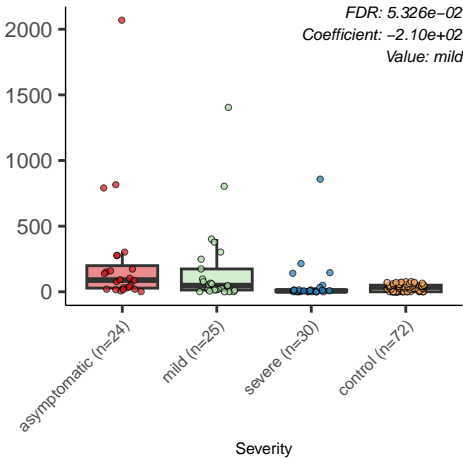

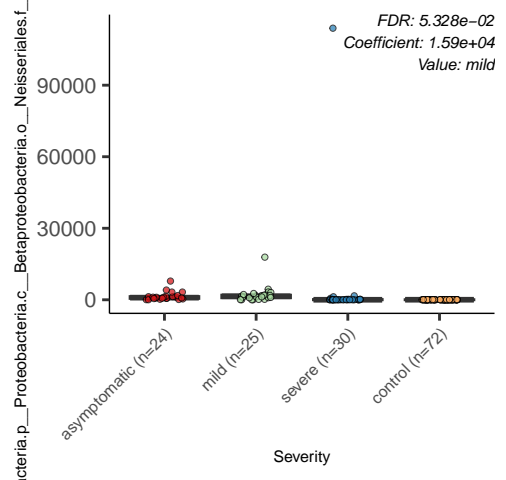

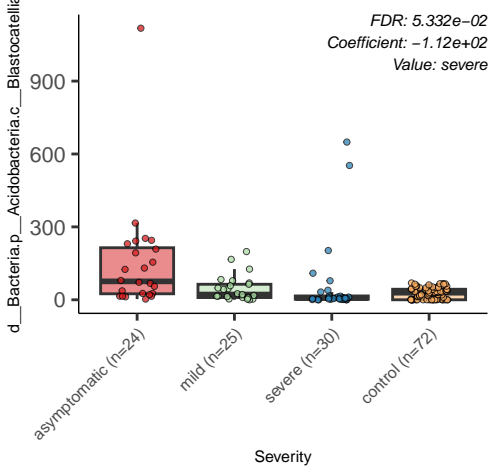

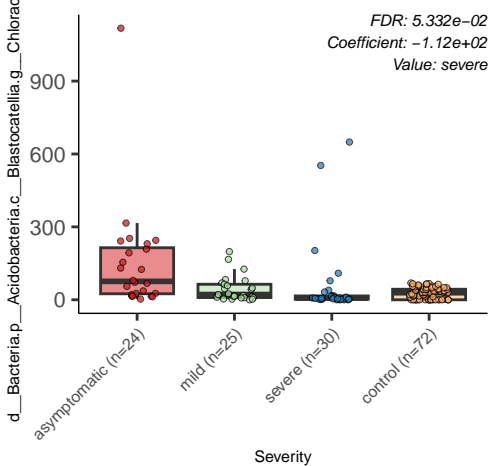

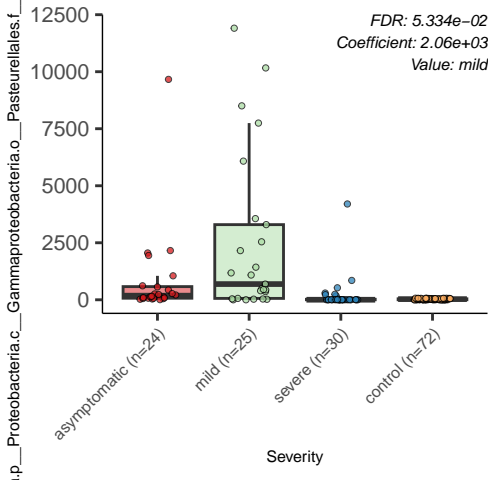

micutes.c\_\_Bacilli.o\_\_Lactobacillales.f\_\_Streptococcaceae.g\_\_Stre

*FDR: 5.342e-02*  
*Coefficient: -2.49e+02*  
*Value: mild*

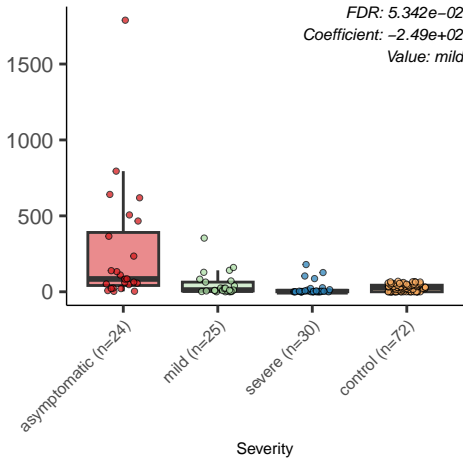



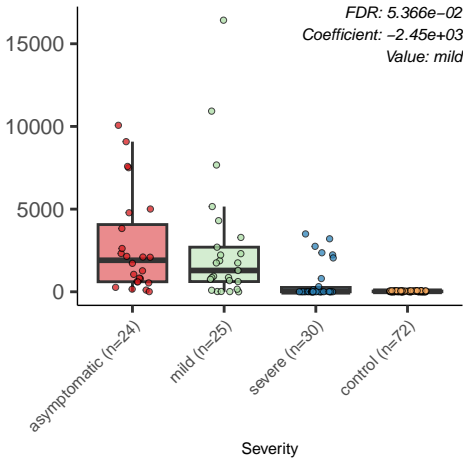

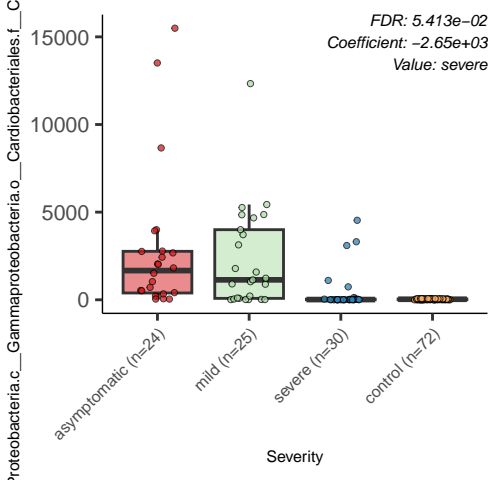

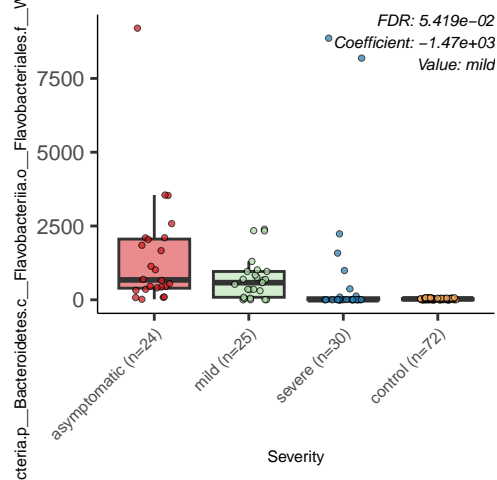

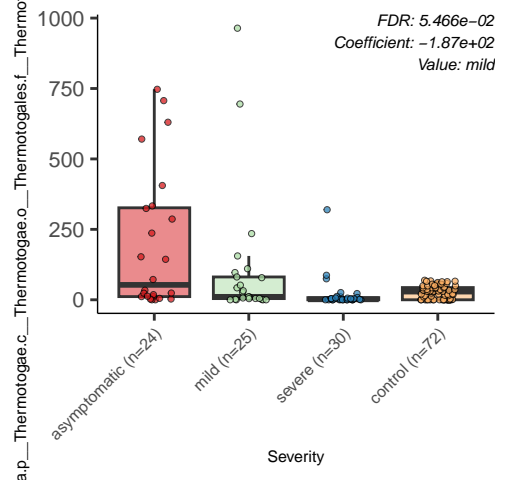

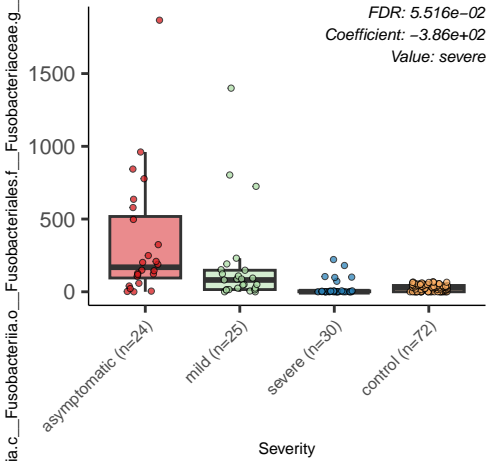

nobacteria.c\_Actinomycetia.o\_Actinomycetales.f\_Actinomycetaceae

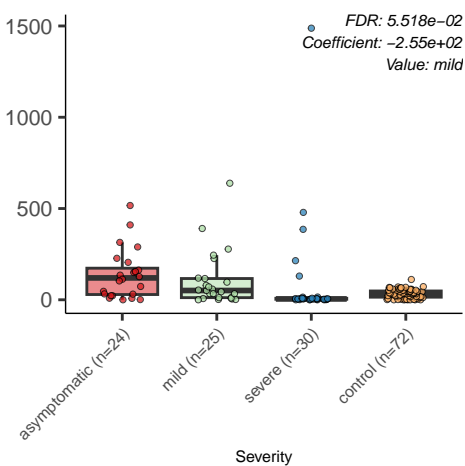

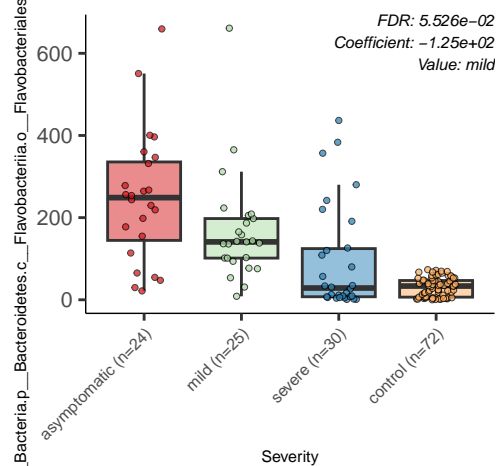

Bacteroidetes.c\_Flavobacteriia.o\_Flavobacteriales.g\_Candidatus

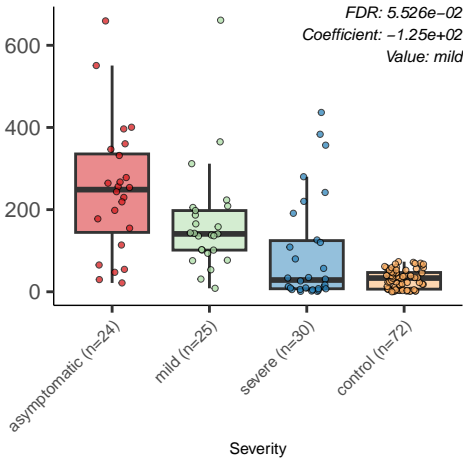



bacteria.c\_\_Betaproteobacteria.o\_\_Neisseriales.f\_\_Neisseriaceae.g

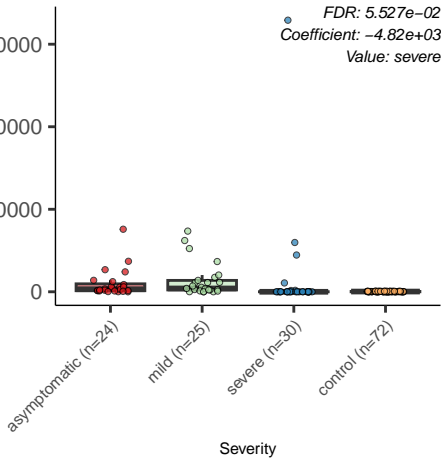

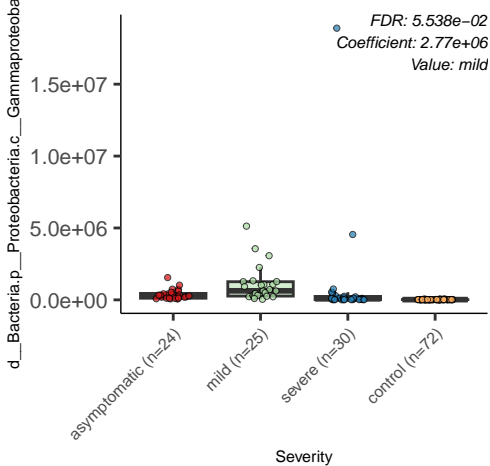

acteria.p\_\_Verrucomicrobia.c\_\_Verrucomicrobiae.o\_\_Verrucomicrobia

*FDR: 5.551e-02*  
*Coefficient: -4.49e+02*  
*Value: severe*

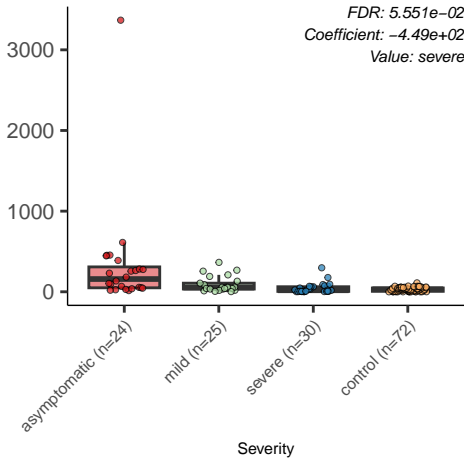

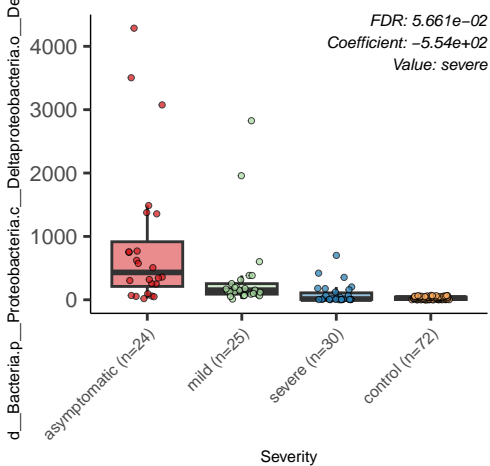

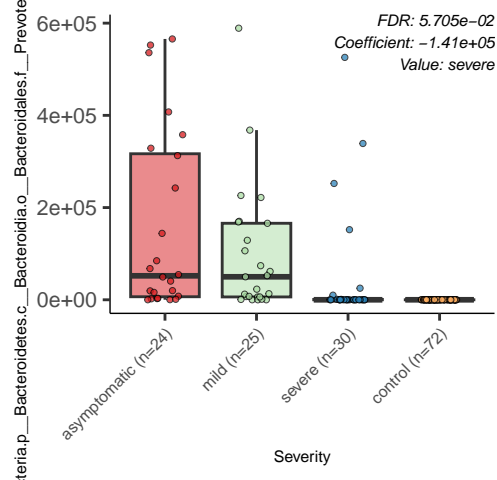

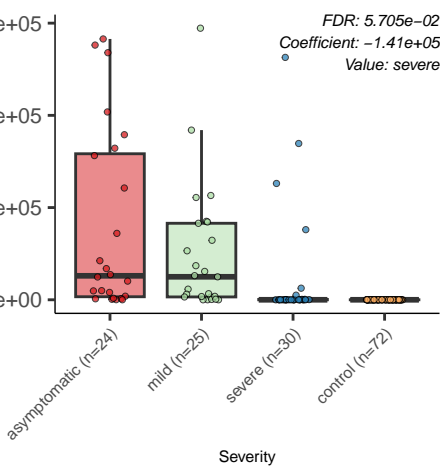

d\_Bacteria.p\_\_Firmicutes.c\_\_Clostridia.o\_\_Eubacteriales.g

FDR: 5.716e-02  
Coefficient: -5.13e+02  
Value: severe

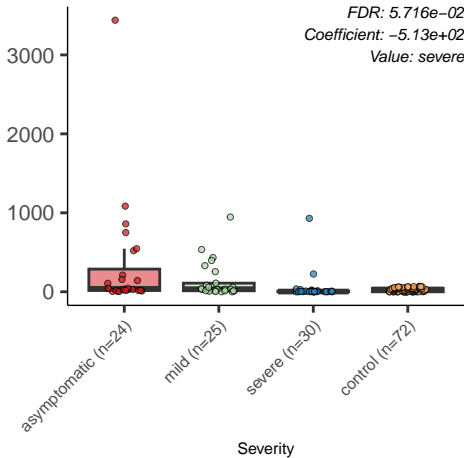

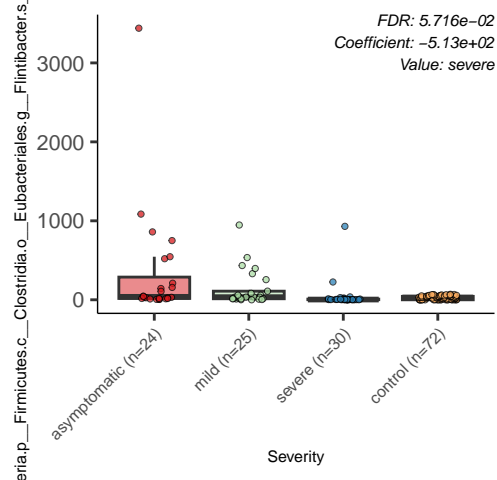



Acetivibrio\_\_Clostridia.o\_\_Eubacteriales.f\_\_Lachnospiraceae.g\_\_Anaer

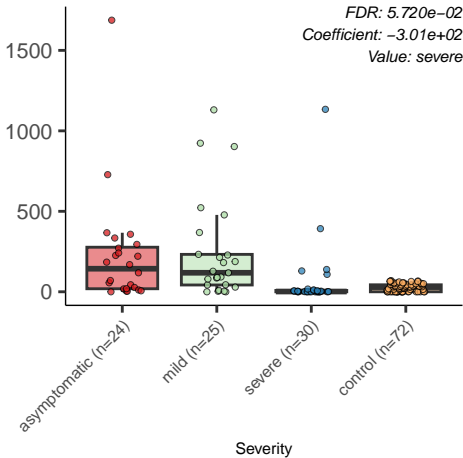

ia.p\_Actinobacteria.c\_Actinomycetia.o\_Actinomycetales.f\_Actin

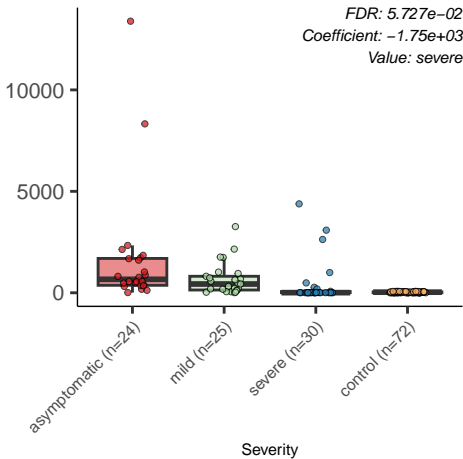

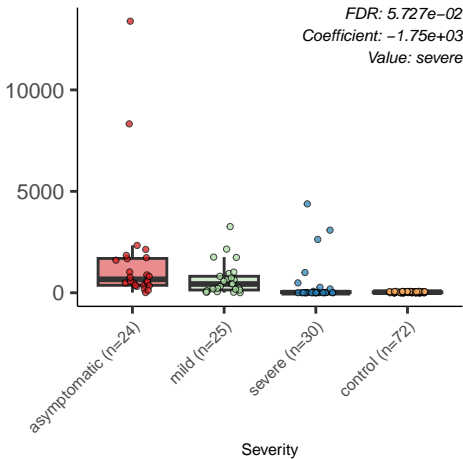

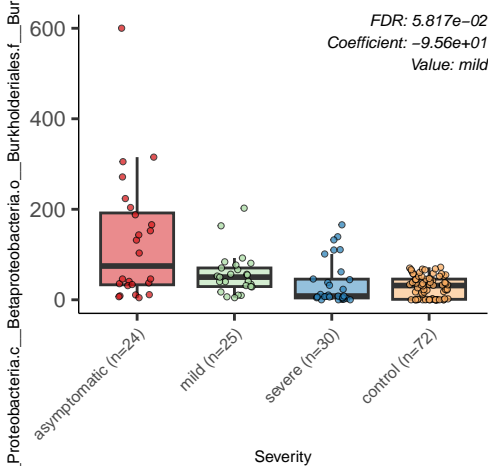

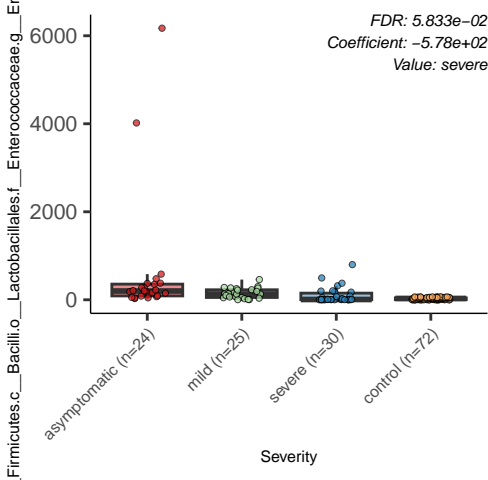

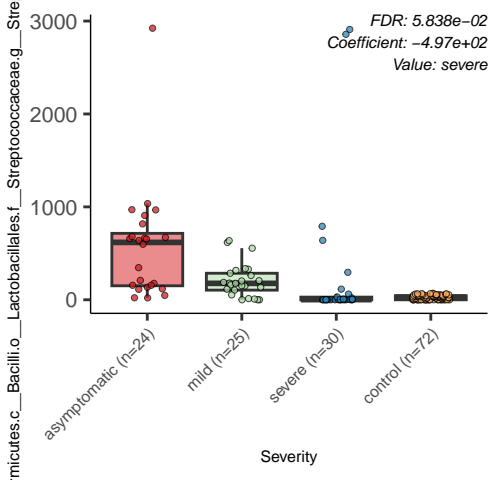

eria.p\_\_Bacteroidetes.c\_\_Flavobacteriia.o\_\_Flavobacteriales.f\_\_Fla

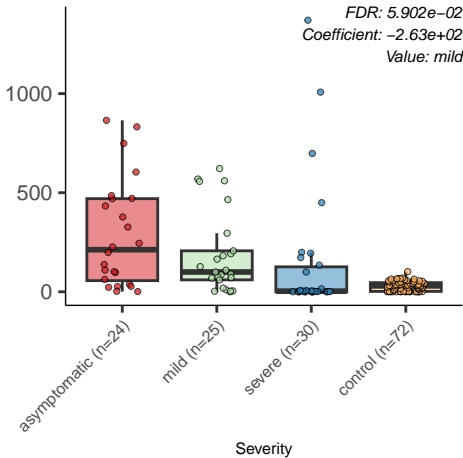

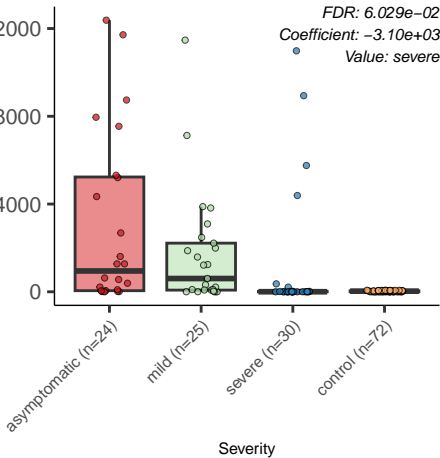



mmaproteobacteria.o\_\_Cardiobacteriales.f\_\_Cardiobacteriaceae.g

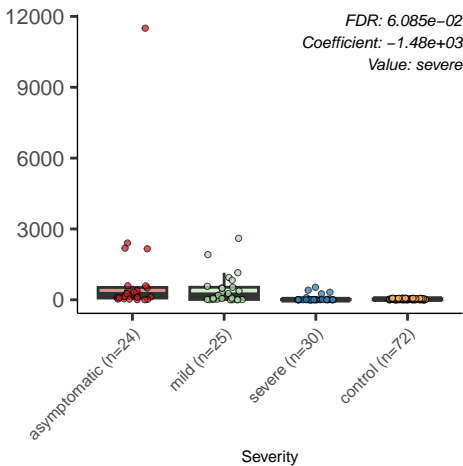

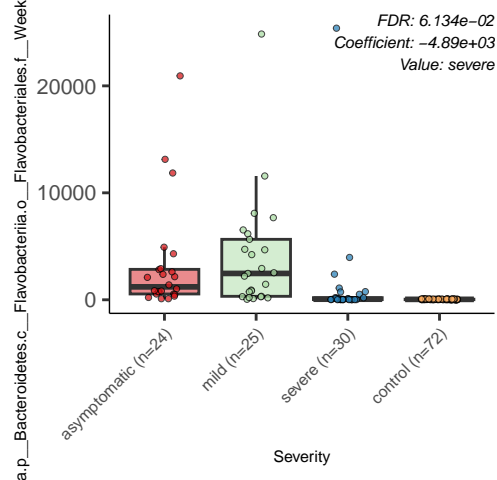

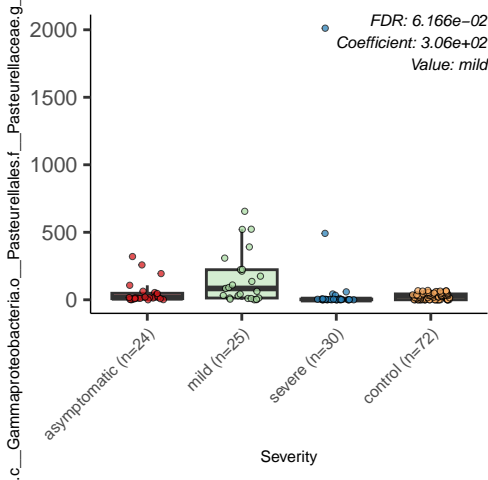

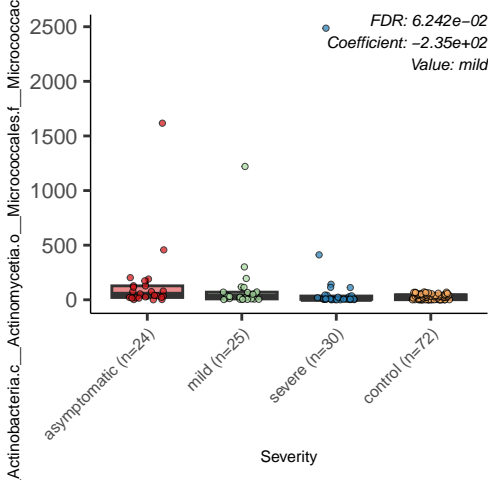

d\_Bacteria.p\_Cyanobacteria

FDR:  $6.290e-02$   
Coefficient:  $-9.05e+03$   
Value: severe

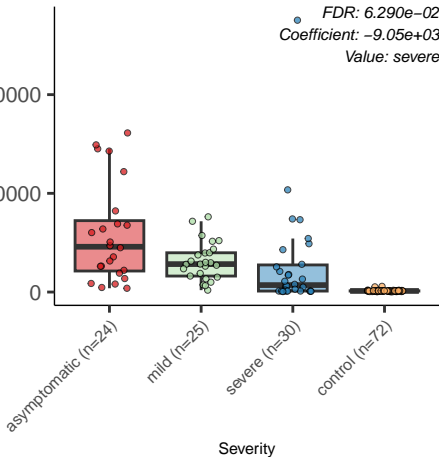

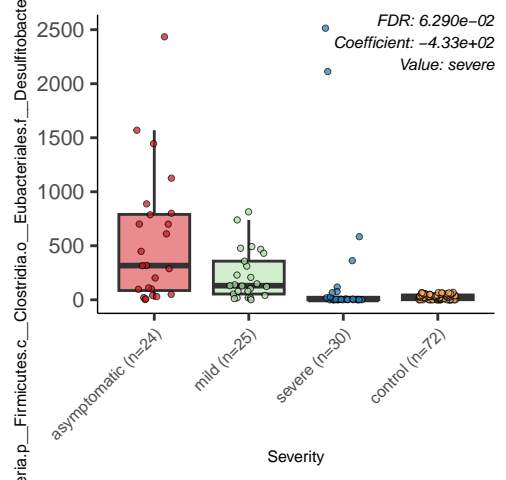

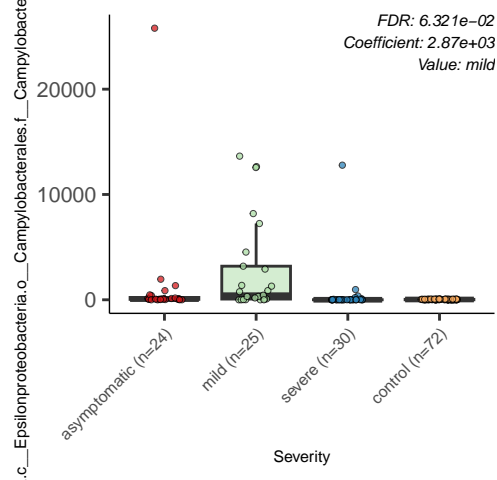

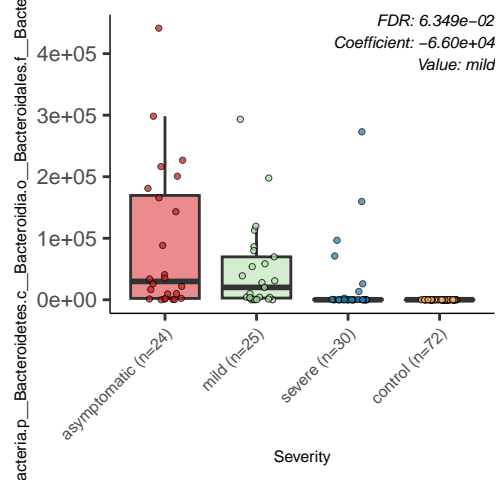



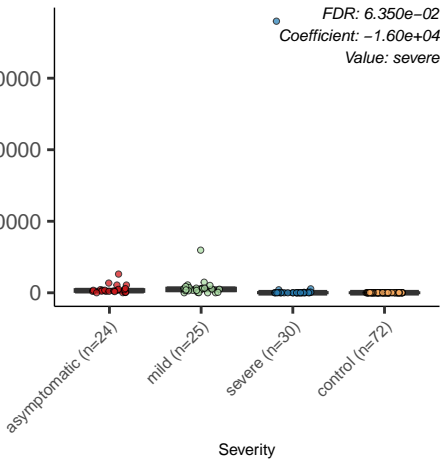

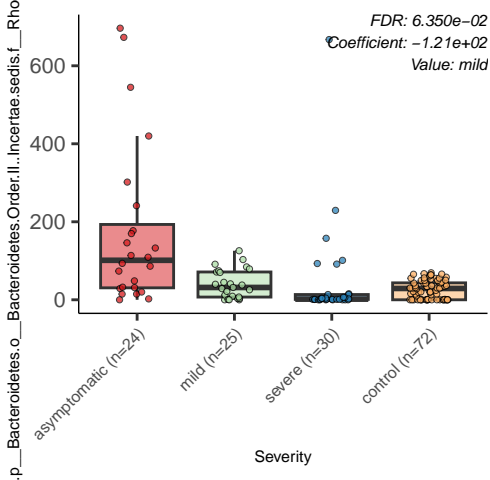

etes.o\_\_Bacteroidetes.Order.II...Incertae.sedis.f\_\_Rhodothermaceae

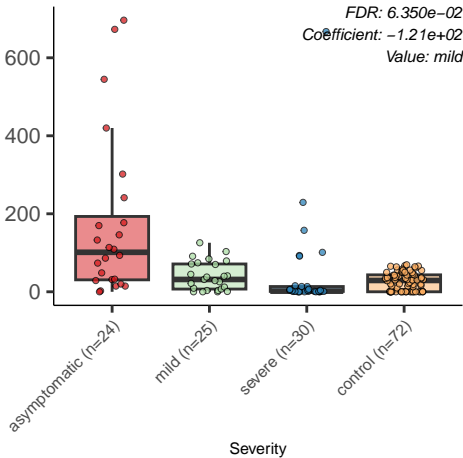

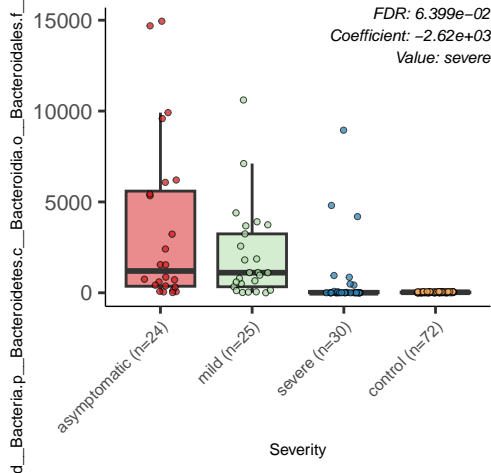

ria.p\_\_Firmicutes.c\_\_Erysipelotrichia.o\_\_Erysipelotrichales.f\_\_Erys

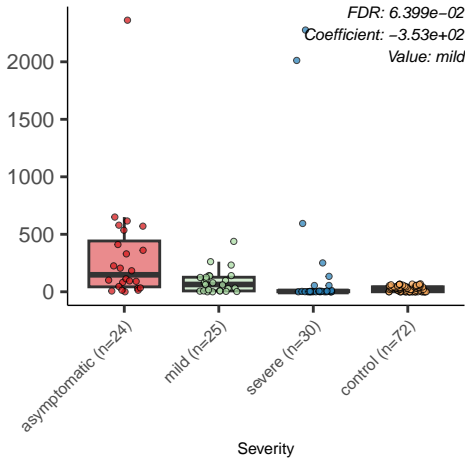

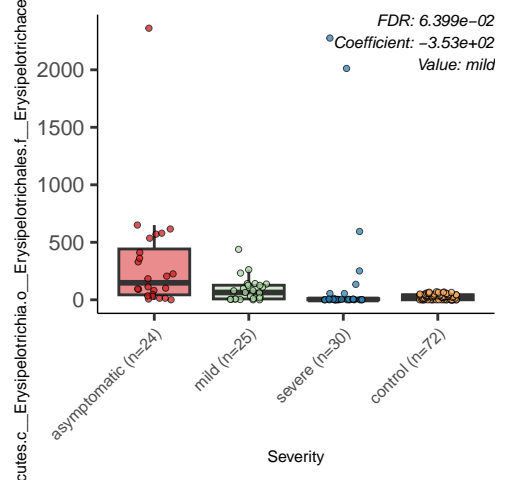

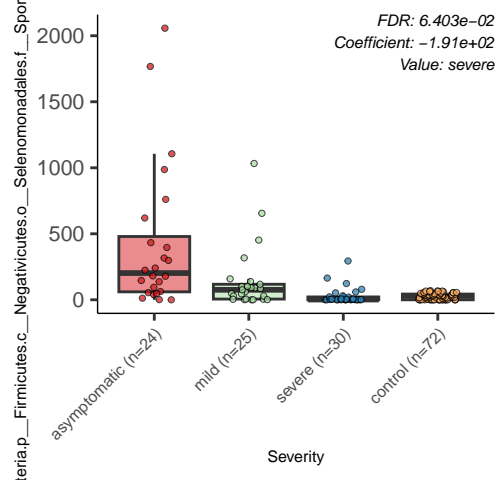

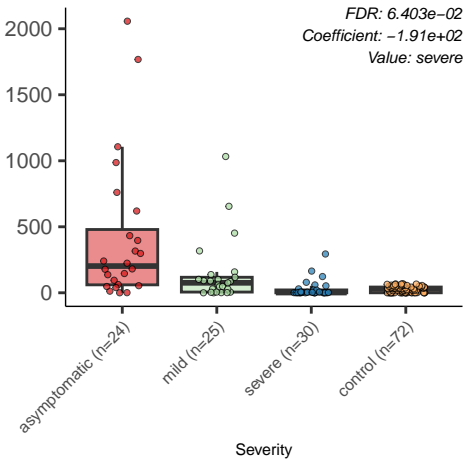



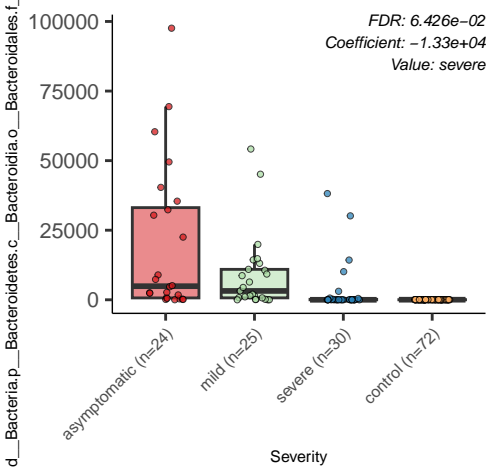

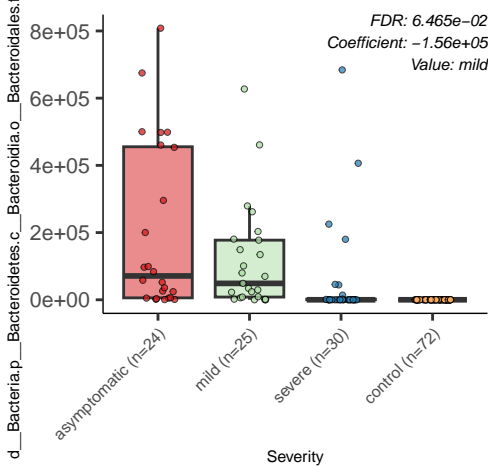

ria.p\_\_Firmicutes.c\_\_Clostridia.o\_\_Eubacteriales.f\_\_Peptostreptococ

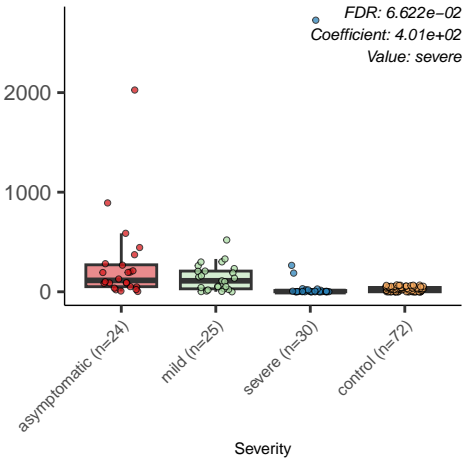

s.c\_\_Clostridia.o\_\_Eubacteriales.f\_\_Peptostreptococaceae.g\_\_Ac

FDR: 6.622e-02  
Coefficient: 4.01e+02  
Value: severe

2000

1000

0

asymptomatic (n=24)

mild (n=25)

severe (n=30)

control (n=72)

Severity

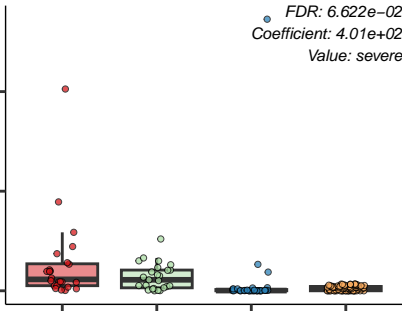

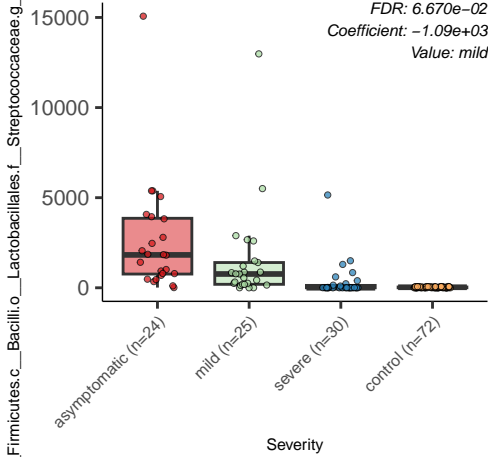

Bacteroidetes.c\_\_Bacteroidia.o\_\_Bacteroidales.f\_\_Bacteroidaceae.g

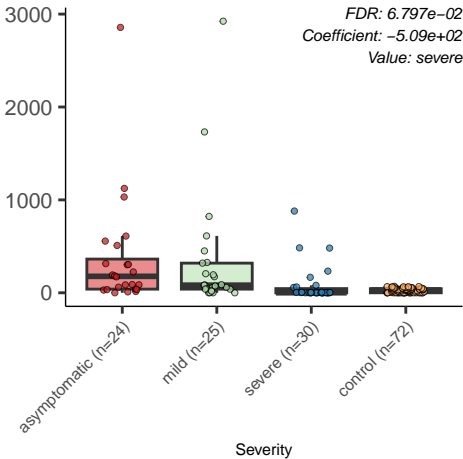

d\_Bacteria.p\_\_Planctomycetes.c\_\_Planctomycetia.o\_\_Plan

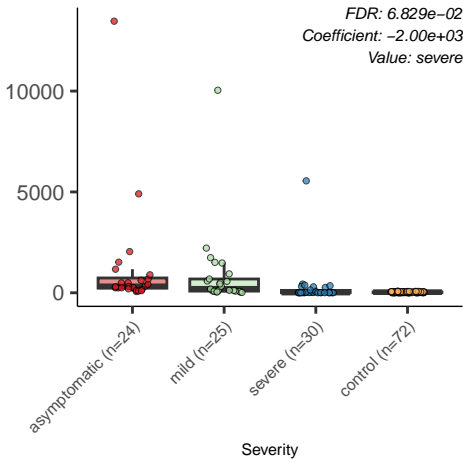

Bacteria.p\_\_Planctomycetes.c\_\_Planctomycetia.o\_\_Planctomycetia

FDR:  $6.829 \times 10^{-2}$   
Coefficient:  $-2.00 \times 10^3$   
Value: severe

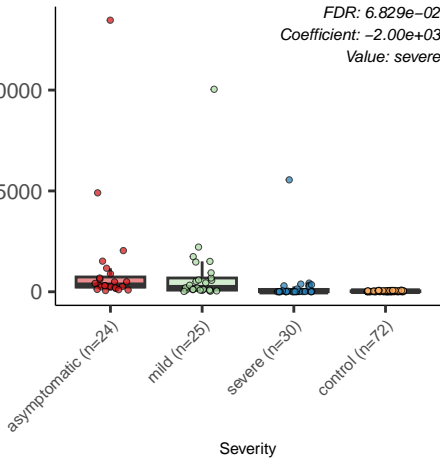



Bacteroidetes.c\_Bacteroidia.o\_Bacteroidales.f\_Rikenellaceae.

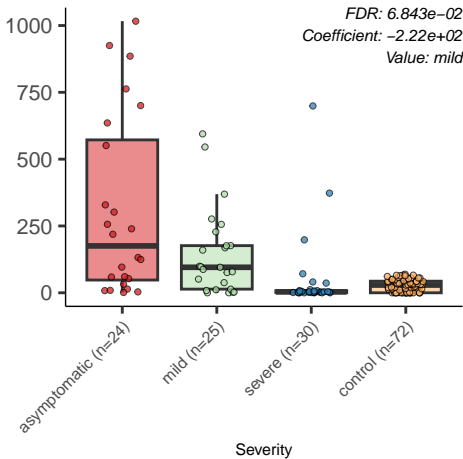



d\_Bacteria.p\_Firmicutes.c\_Bacilli.o\_Bacillales.f\_Paenibacillales

FDR:  $6.975e-02$   
Coefficient:  $-1.73e+02$   
Value: mild

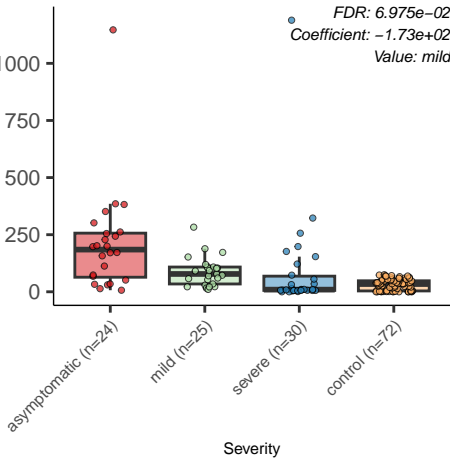

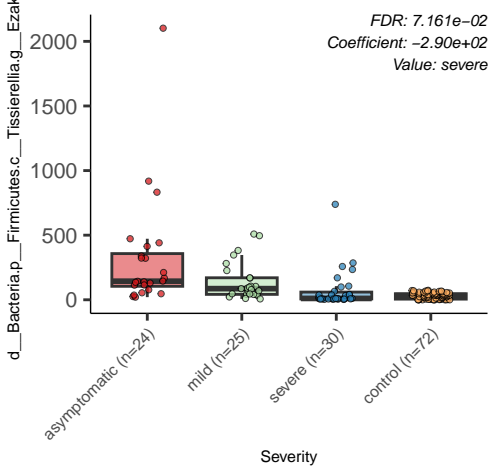

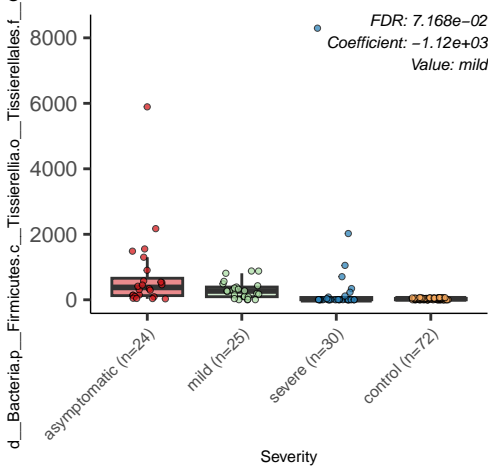

Bacteria.p\_Firmicutes.c\_Tissierellia.o\_Tissierellales.f\_Gottschalkia.g

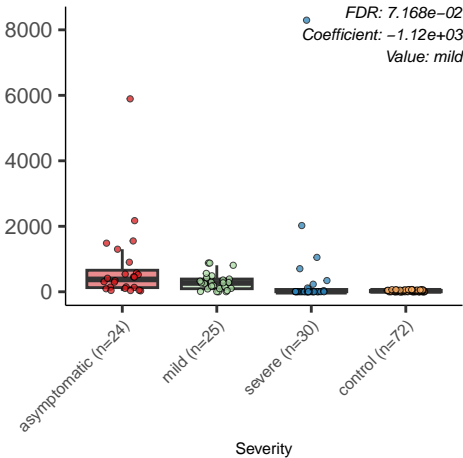

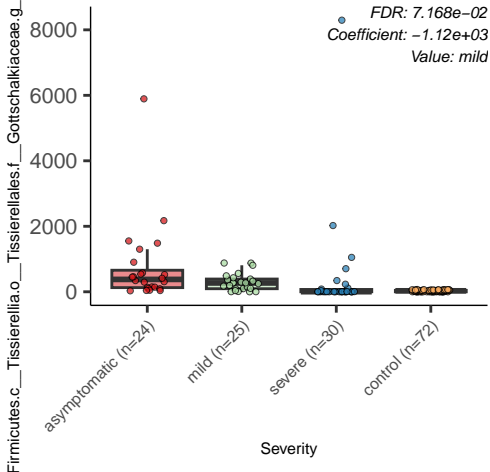

d\_Bacteria.p\_Bacteroidetes.c\_Cytophagia.o\_Cytophagales

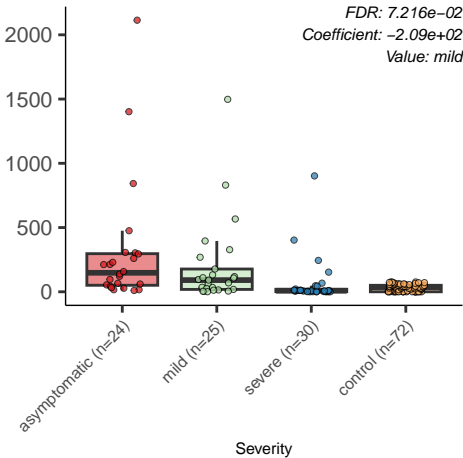



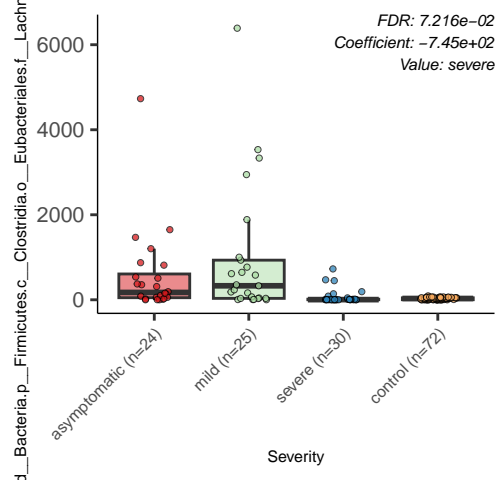

u.p\_\_Firmicutes.c\_\_Clostridia.o\_\_Eubacteriales.f\_\_Lachnospiraceae

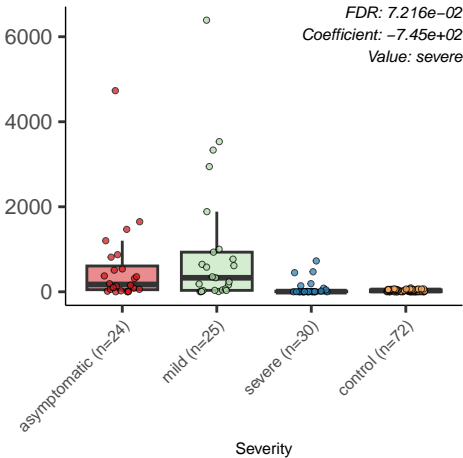

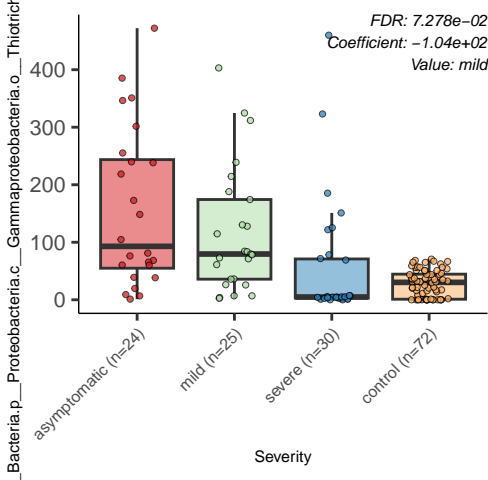

Bacteroidetes.c\_\_Bacteroidia.o\_\_Bacteroidales.f\_\_Prevotellaceae.

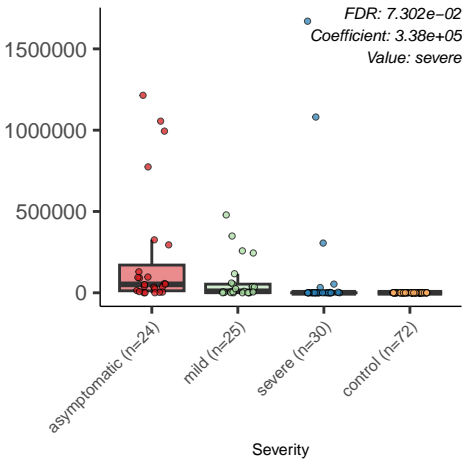

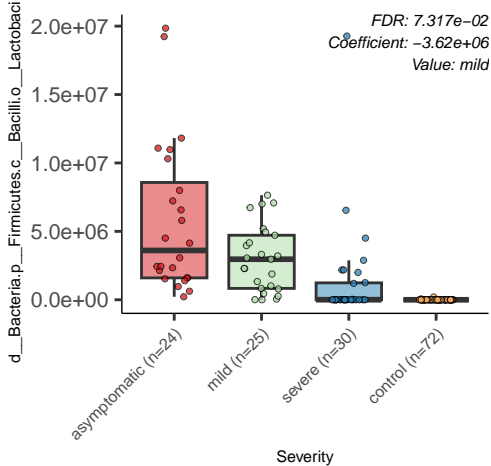

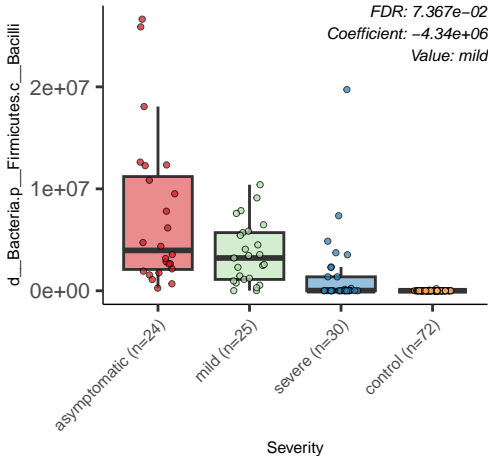

ps.c\_\_Clostridia.o\_\_Eubacteriales.f\_\_Eubacteriales.Family.XIII..Ince

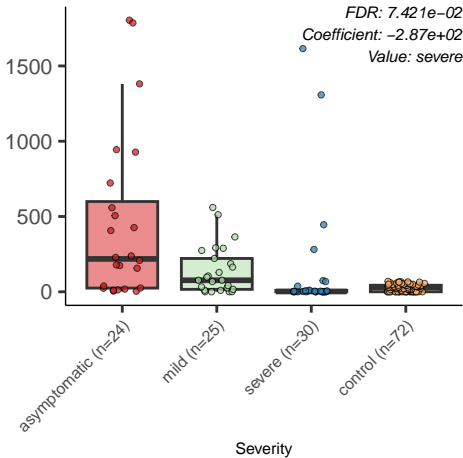

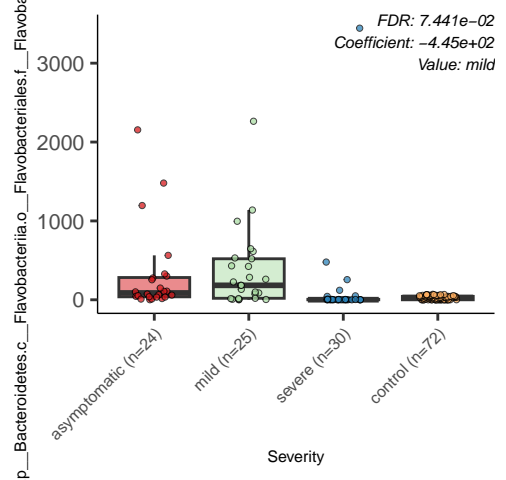



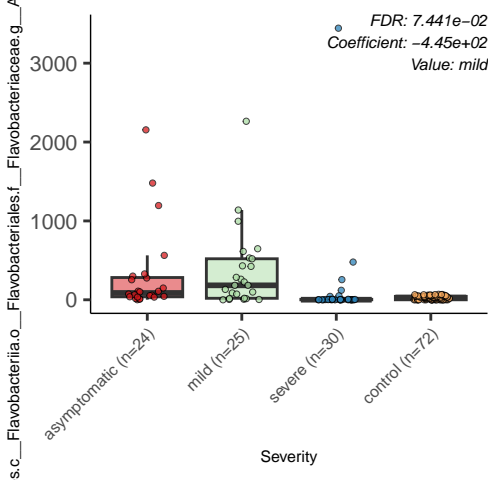

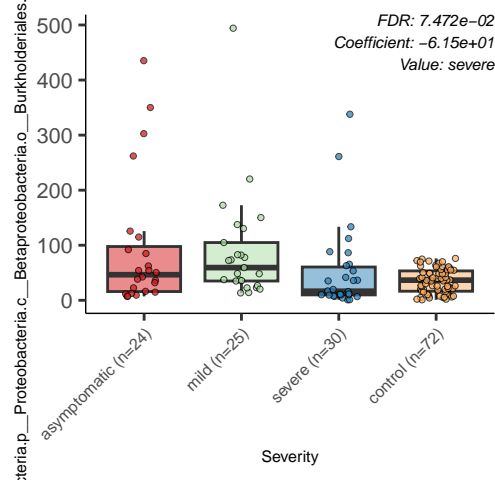

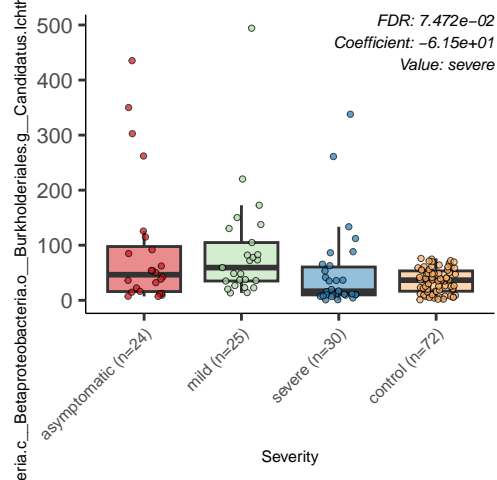

Bacteria.p\_\_Firmicutes.c\_\_Tissierellia.o\_\_Tissierellales.f\_\_Peptonip

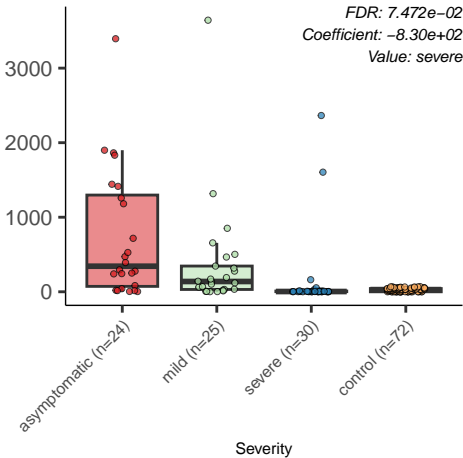

Firmicutes.c\_\_Tissierellia.o\_\_Tissierellales.f\_\_Peptoniphilaceae.g

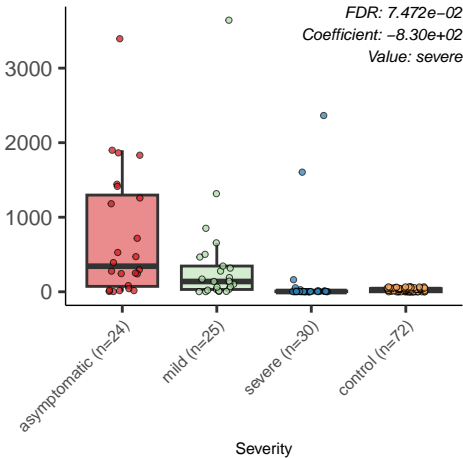

bacteria.p\_\_Bacteroidetes.c\_\_Bacteroidia.o\_\_Bacteroidales.f\_\_Barn

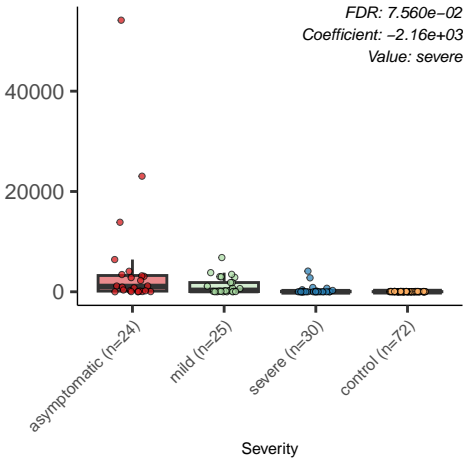

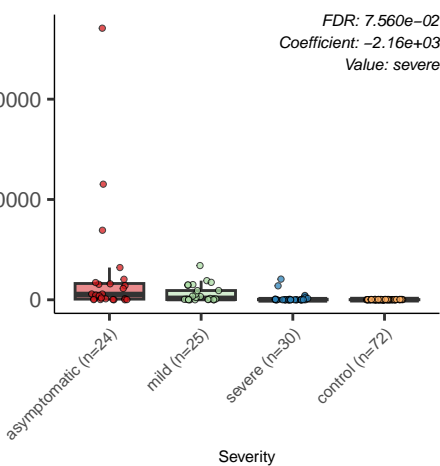

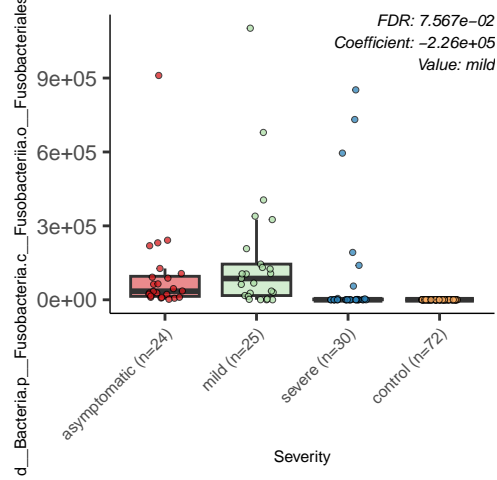



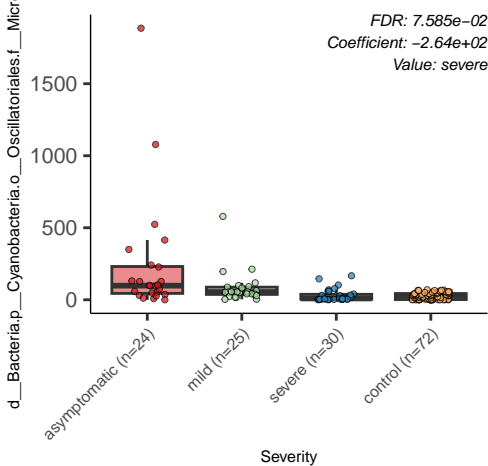

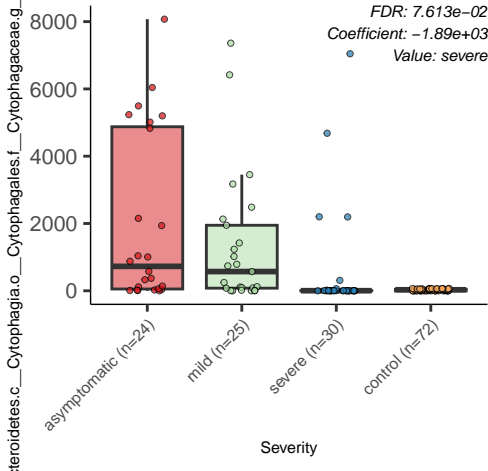

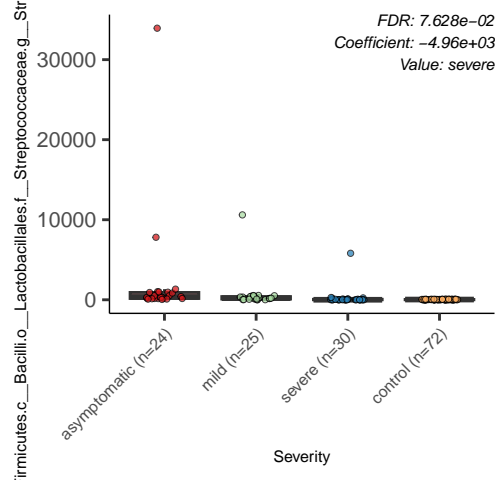

ia.c\_Actinomycetia.o\_Pseudonocardiales.f\_Pseudonocardiaaceae

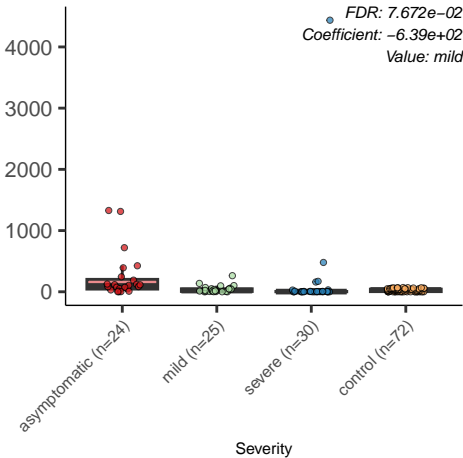

Firmicutes.c\_\_Clostridia.o\_\_Eubacteriales.f\_\_Lachnospiraceae.g

FDR:  $7.672e-02$   
Coefficient:  $-1.34e+03$   
Value: severe

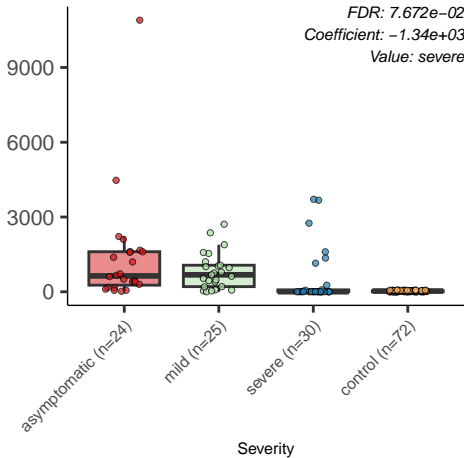

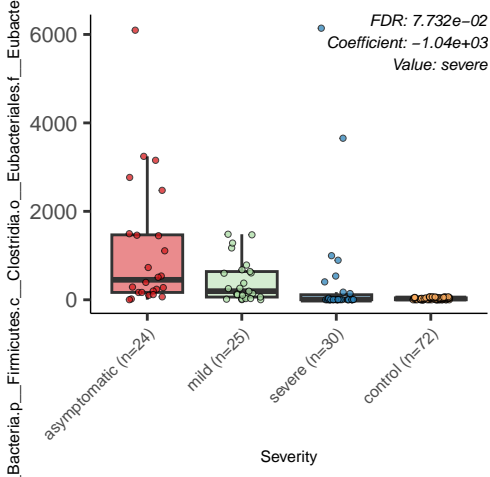

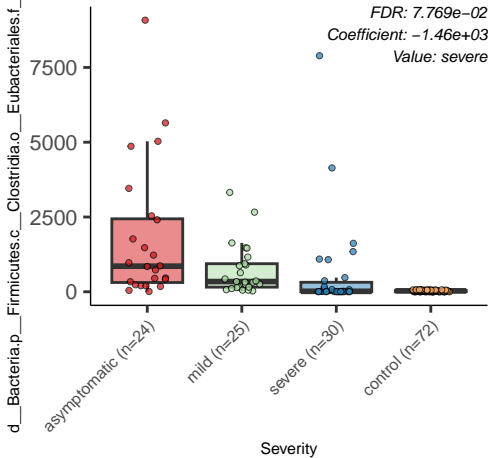

d\_Bacteria.p\_Firmicutes.c\_Bacilli.o\_Bacillales.f\_Bacillaceae

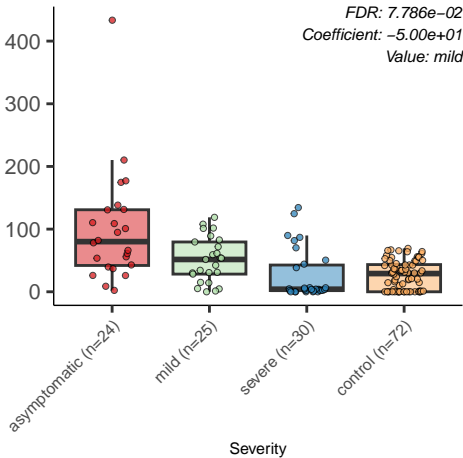



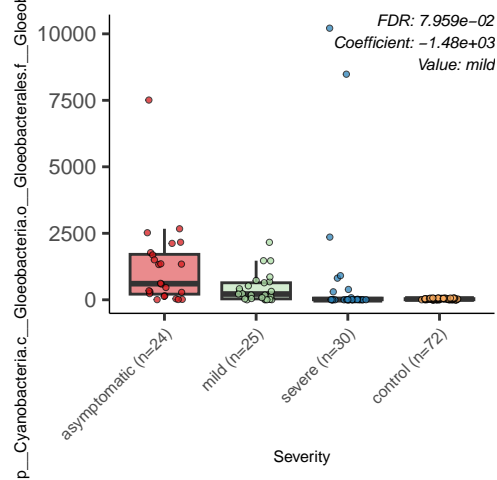

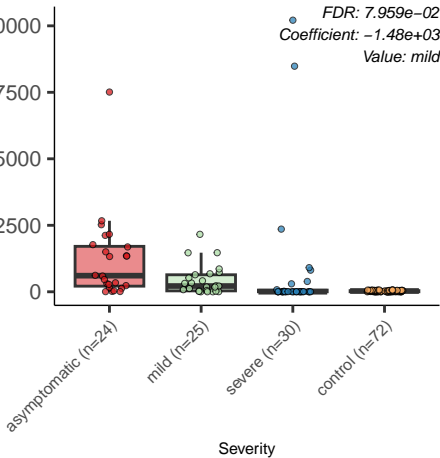

tes.c\_Bacteroidia.o\_Bacteroidales.f\_Porphyromonadaceae.g

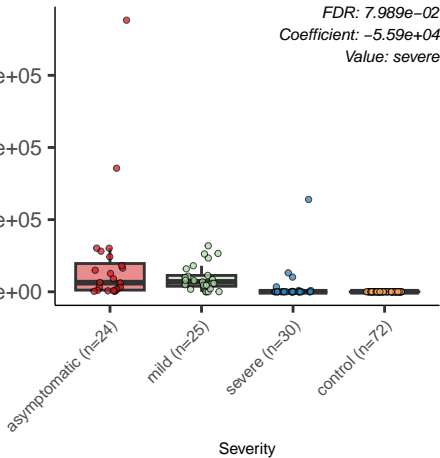

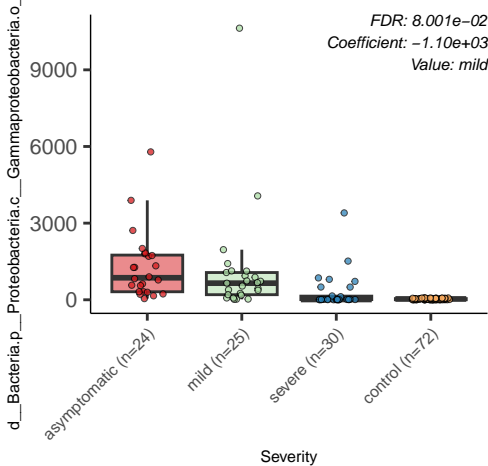

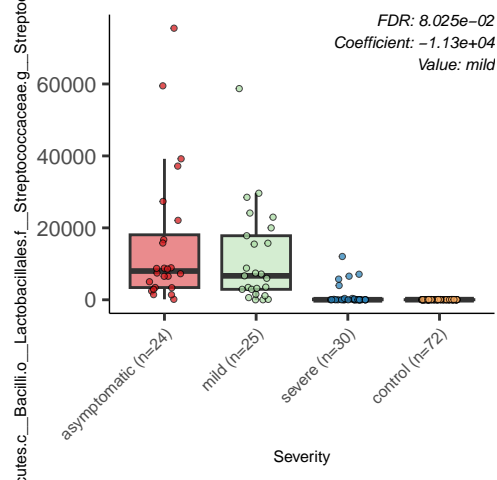

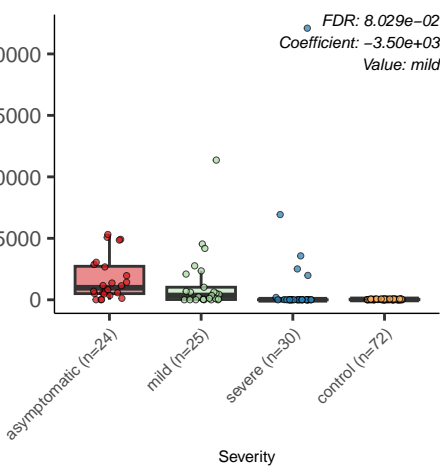

acteria.c\_Actinomycetia.o\_Micrococcales.f\_Microbacteriaceae.g

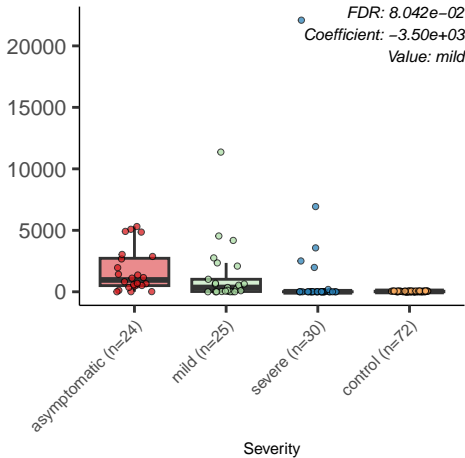

teobacteria.c\_\_Betaproteobacteria.o\_\_Neisseriales.f\_\_Neisseriace

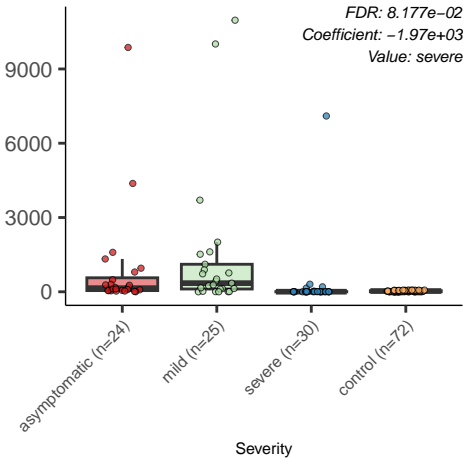



rmicutes.c\_Bacilli.o\_Lactobacillales.f\_Streptococcaceae.g\_Stre

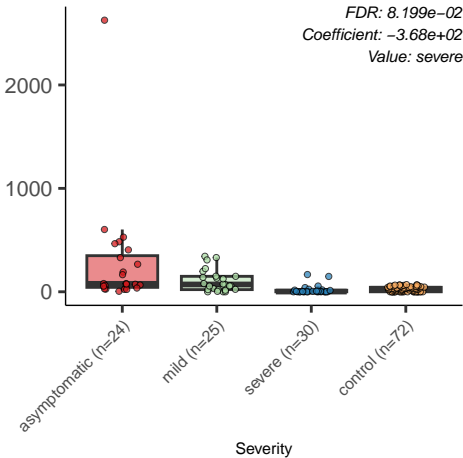

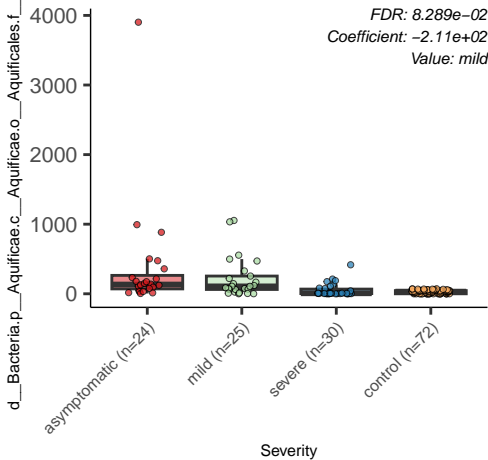

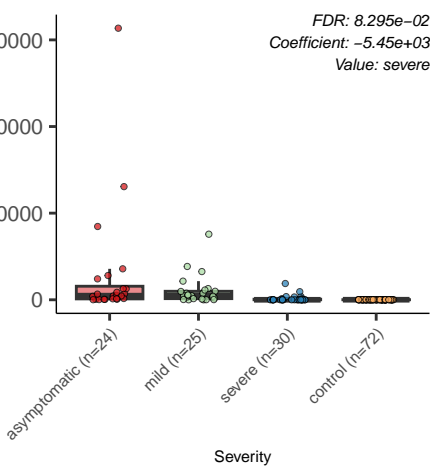

Actinomyces

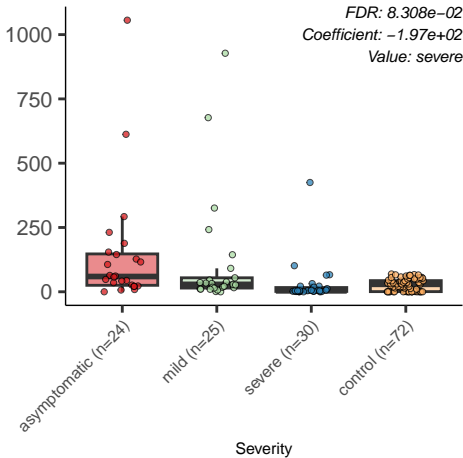

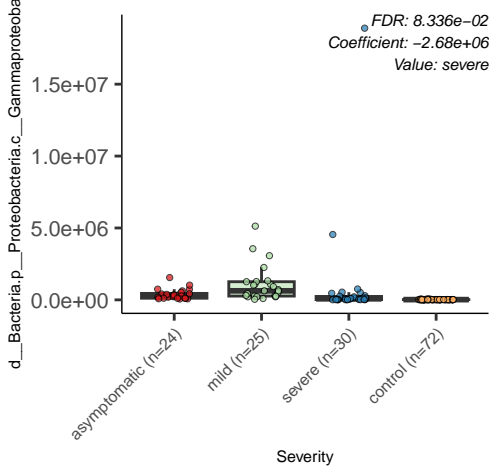

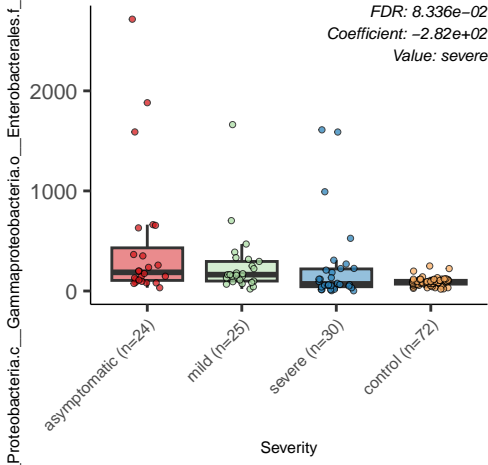

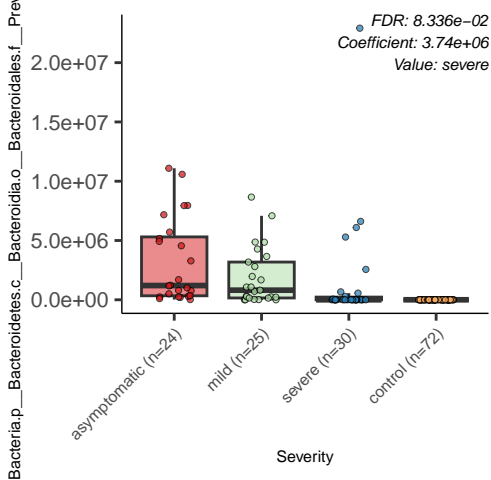

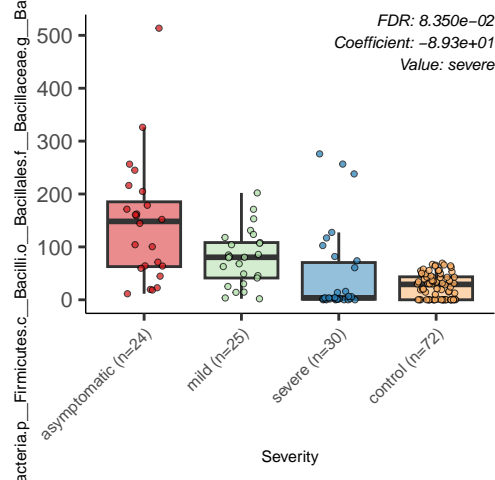



d\_\_Bacteria.p\_\_Tenericutes

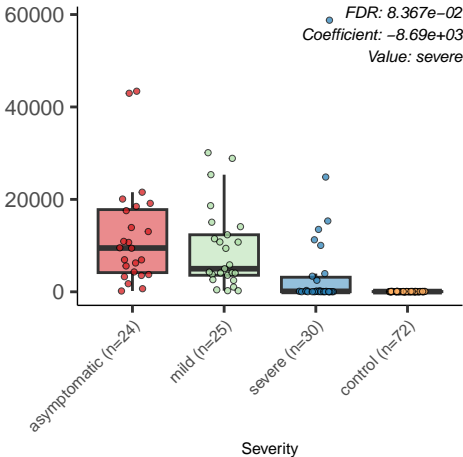

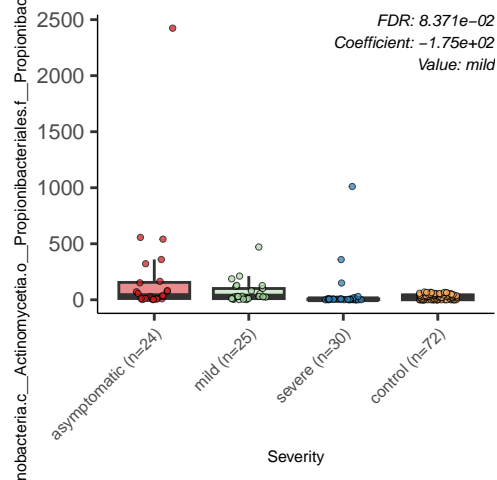

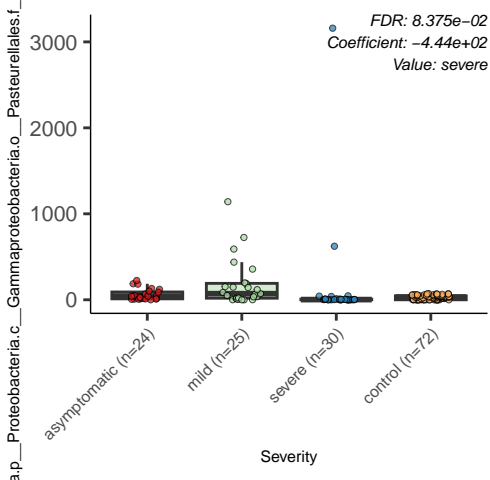

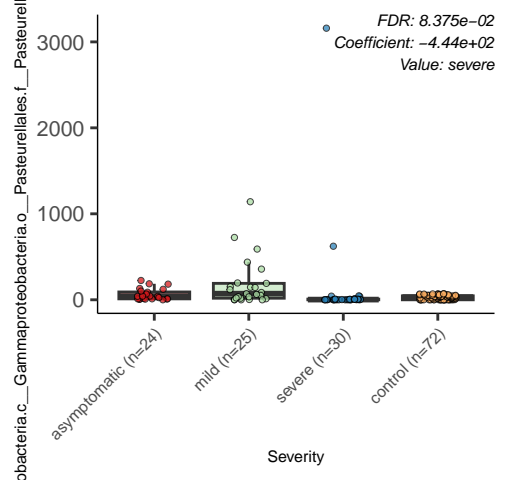

idetes.c\_\_Flavobacteriia.o\_\_Flavobacteriales.f\_\_Weeksellaceae.g

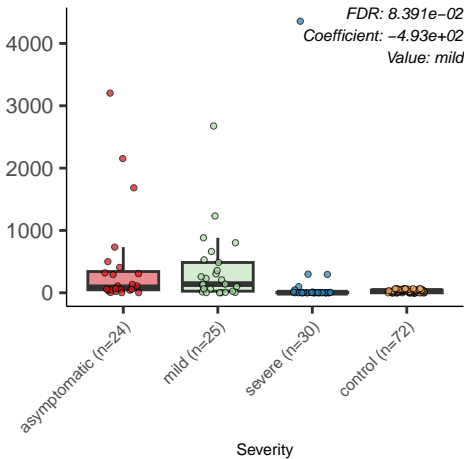

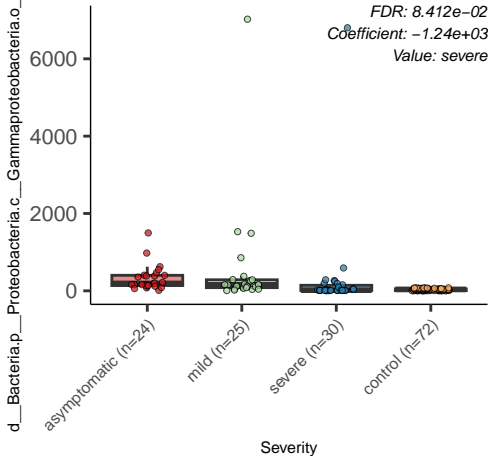

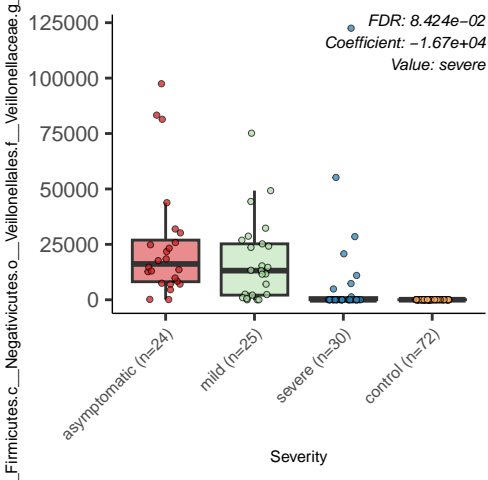

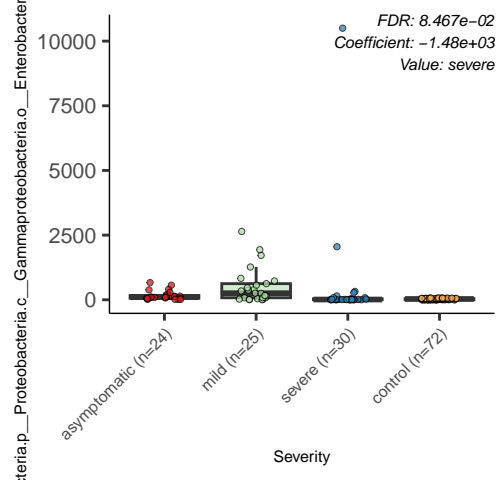



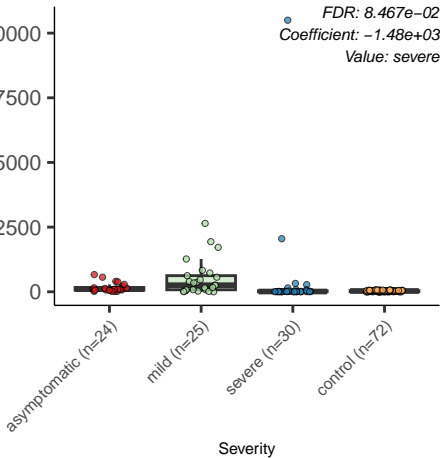

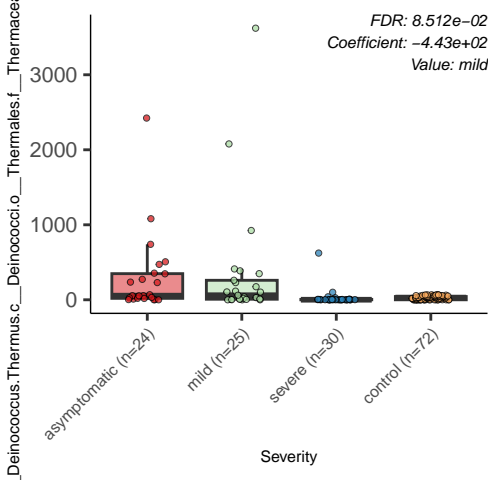

cutes.c\_\_Clostridia.o\_\_Eubacteriales.f\_\_Oscillospiraceae.g\_\_Faeca

FDR:  $8.546e-02$   
Coefficient:  $-2.96e+02$   
Value: severe

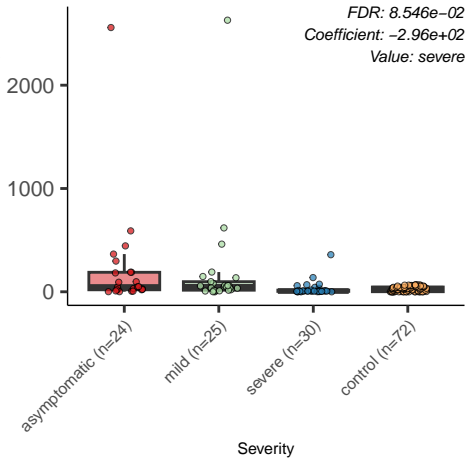

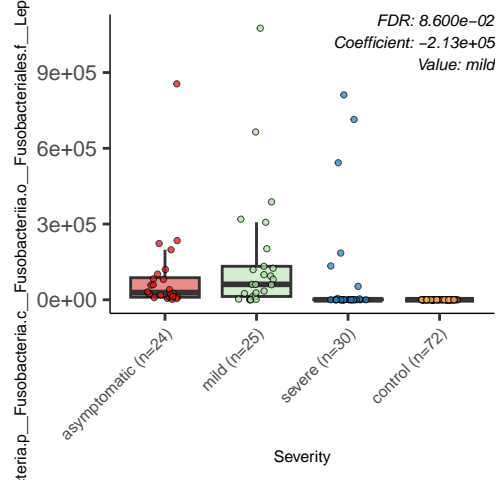

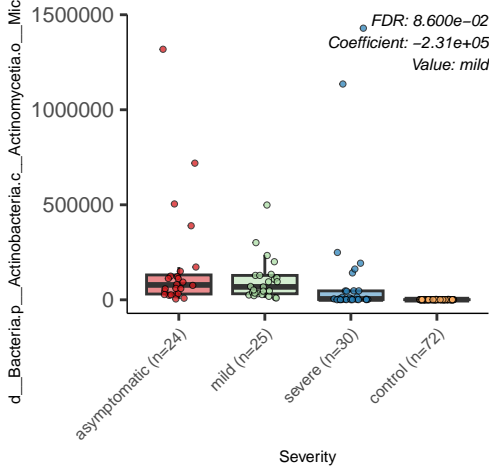

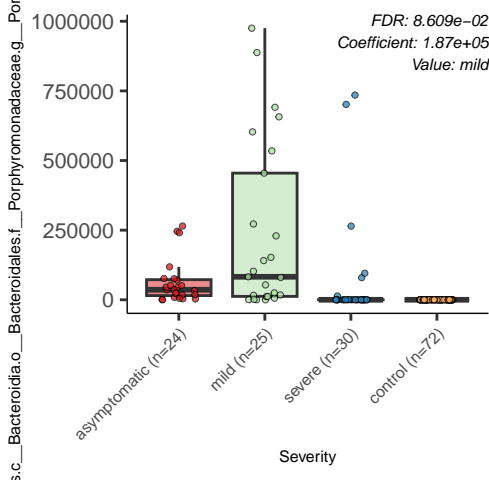

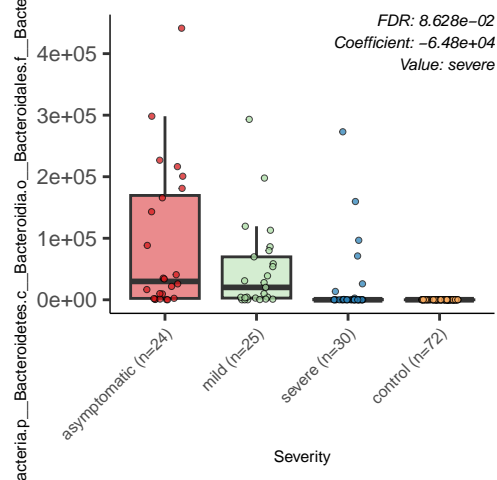

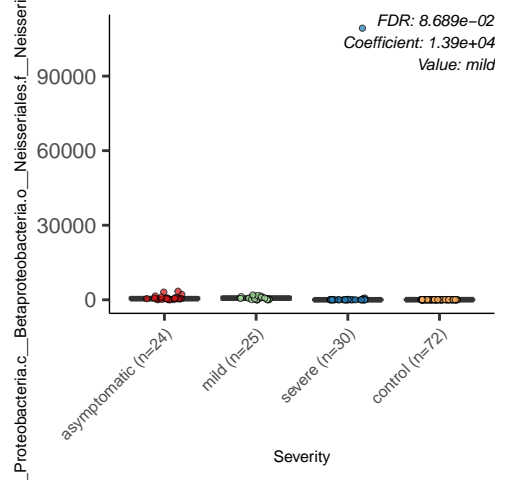



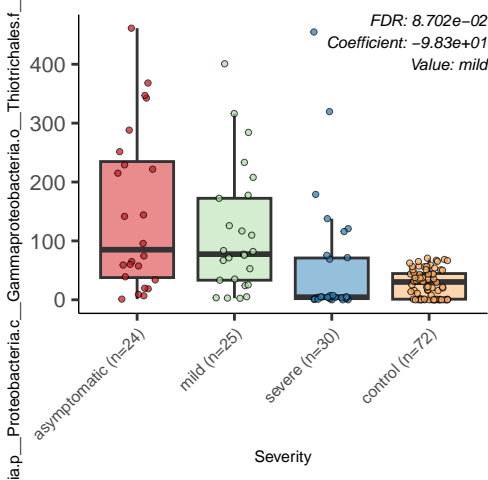

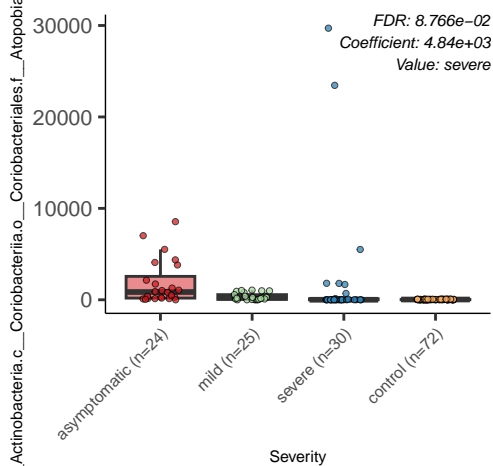

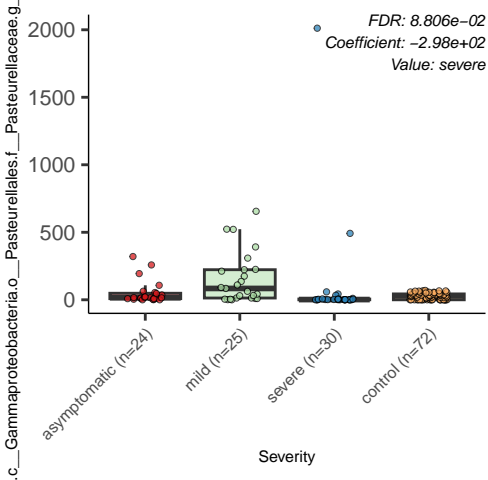

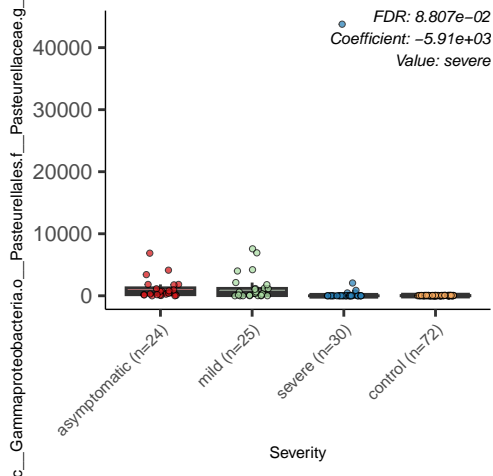

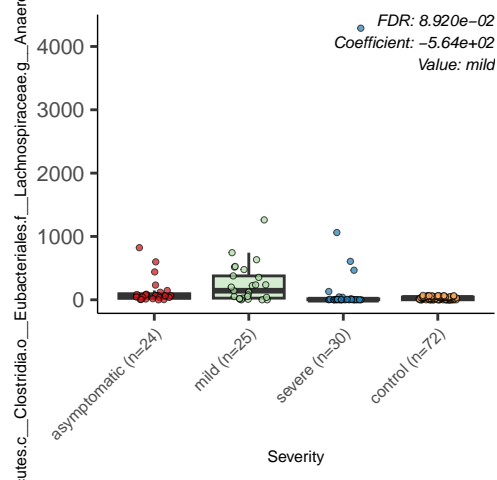

Bacteria.p\_\_Proteobacteria.c\_\_Deltaproteobacteria.o\_\_Myxococ

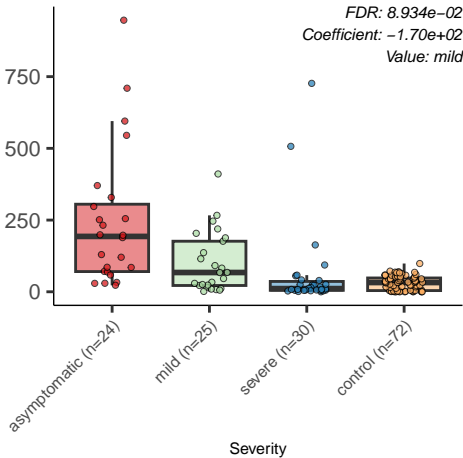

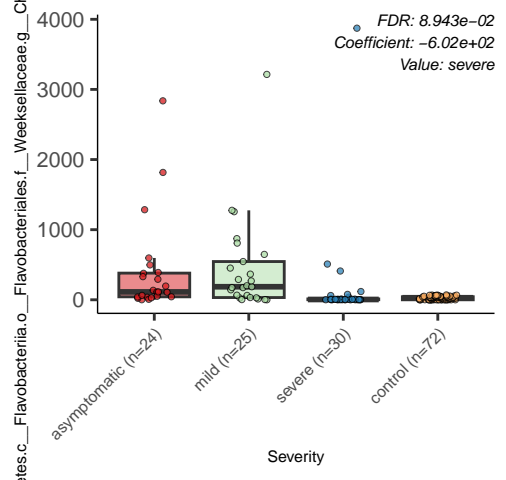

d\_\_Bacteria.p\_\_Bacteroidetes.o\_\_Candidatus.Sulfidib

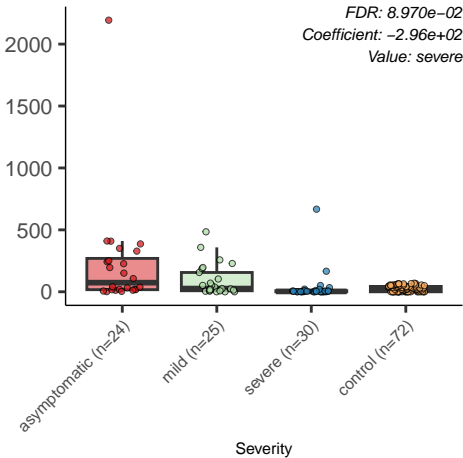



Bacteria.p\_\_Bacteroidetes.o\_\_Candidatus.Sulfidibacteriales.g\_\_Ca

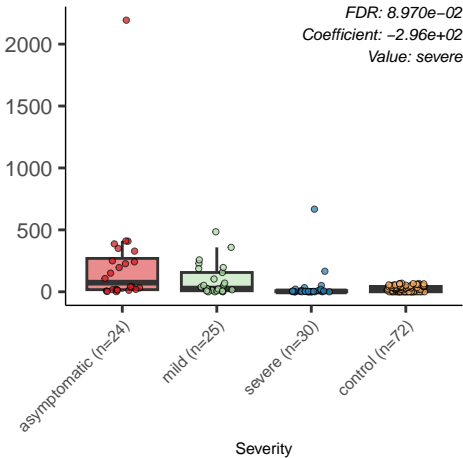

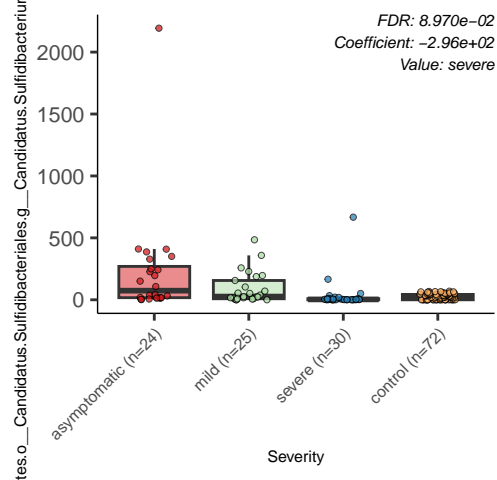

tes.c\_\_Bacilli.o\_\_Lactobacillales.f\_\_Streptococcaceae.g\_\_Streptococcus

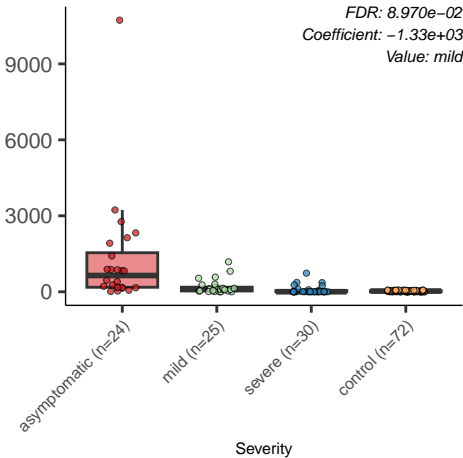

c\_\_Gammaproteobacteria.o\_\_Enterobacterales.f\_\_Bruguerivoraca

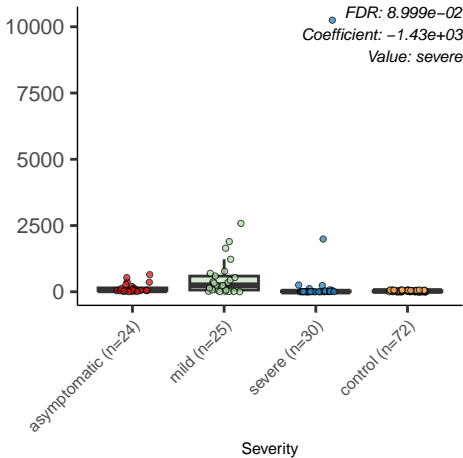

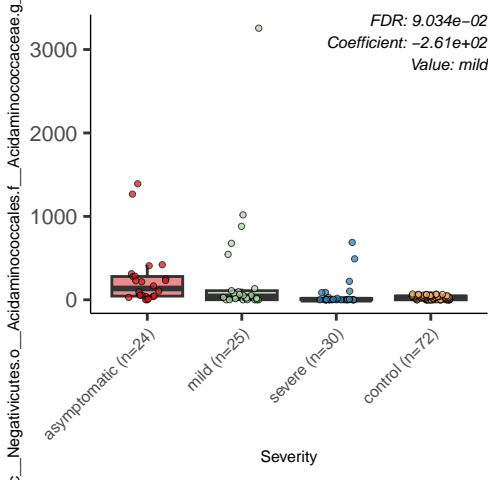

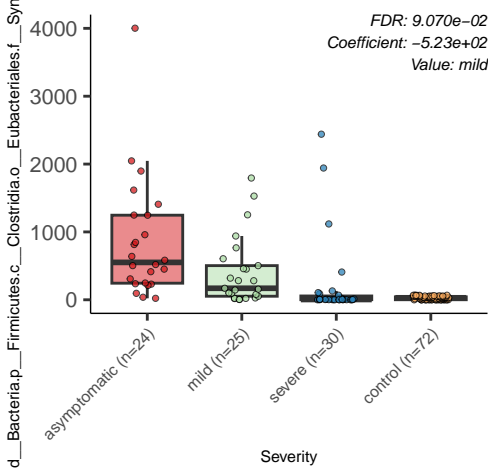

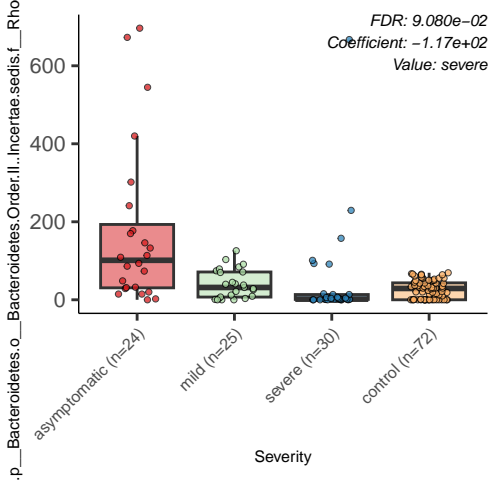

etes.o\_\_Bacteroidetes.Order.II...Incertae.sedis.f\_\_Rhodothermaceae

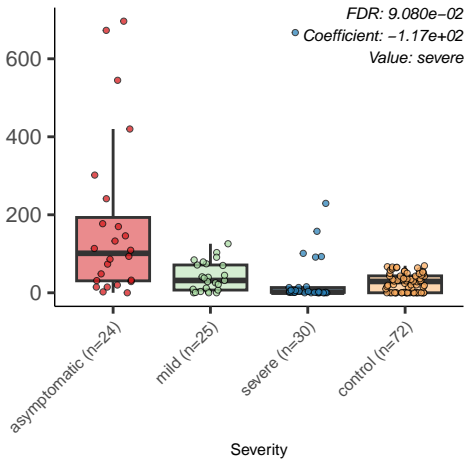



d\_\_Bacteria.p\_\_Cyanobacteria.o\_\_Pseudanabaena

FDR:  $9.159 \times 10^{-2}$   
Coefficient:  $-1.70 \times 10^3$   
Value: severe

10000

5000

0

asymptomatic (n=24)

mild (n=25)

severe (n=30)

control (n=72)

Severity

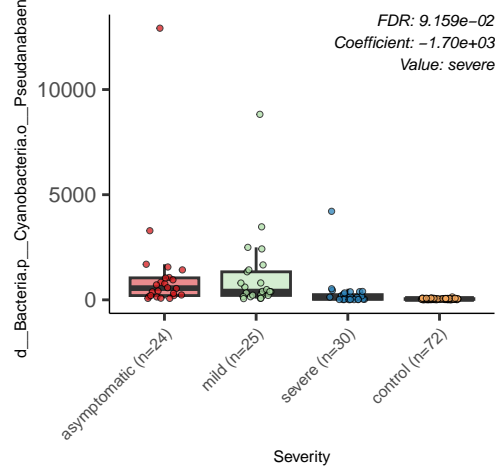

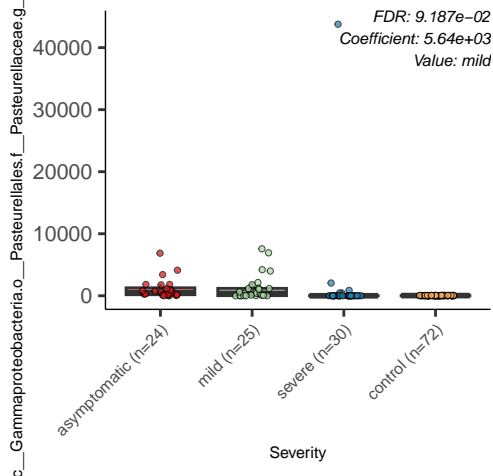

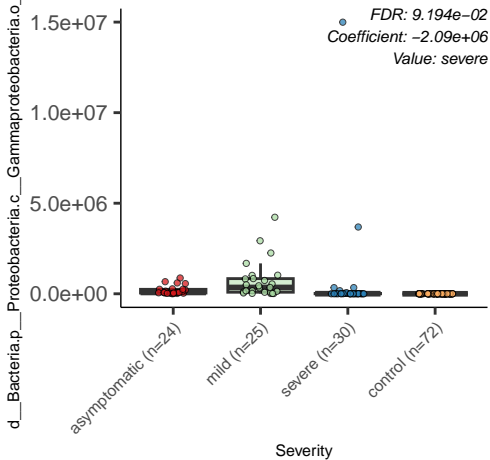

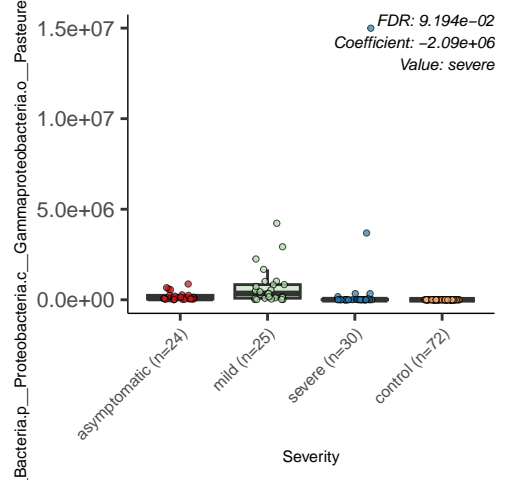

s.c.\_Flavobacteriia.o\_Flavobacteriales.f\_Flavobacteriaceae.g

FDR:  $9.204e-02$   
Coefficient:  $6.60e+02$   
Value: mild

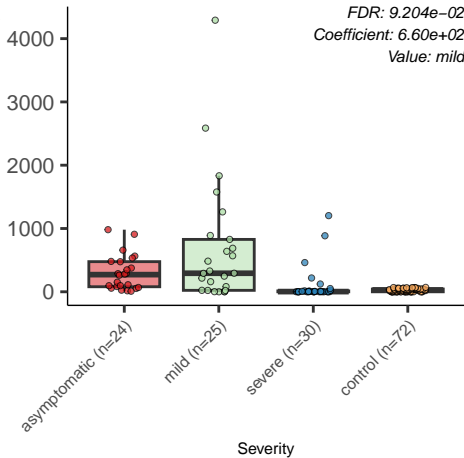

Bacteria.p\_Firmicutes.c\_Clostridia.o\_Eubacteriales.f\_Oscillosp

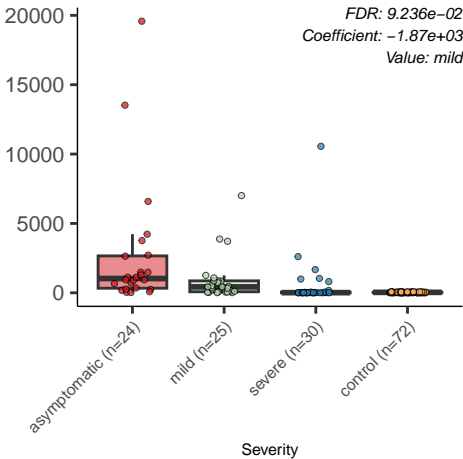

ia.p\_\_Proteobacteria.c\_\_Gammaproteobacteria.o\_\_Enterobacteriale

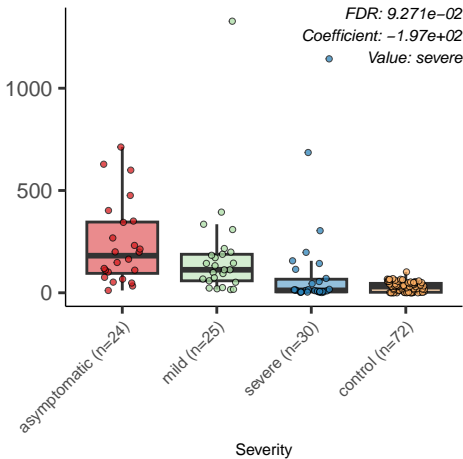

obacteria.c\_\_Gammaproteobacteria.o\_\_Enterobacterales.f\_\_Erwinia

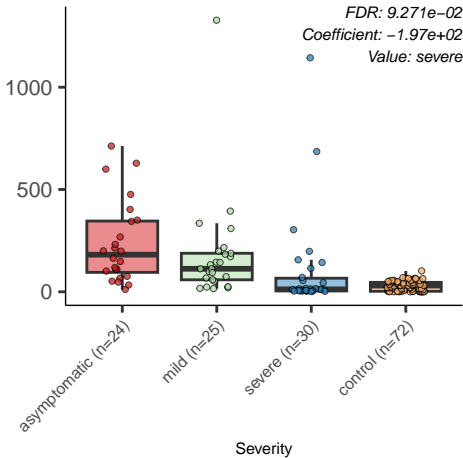



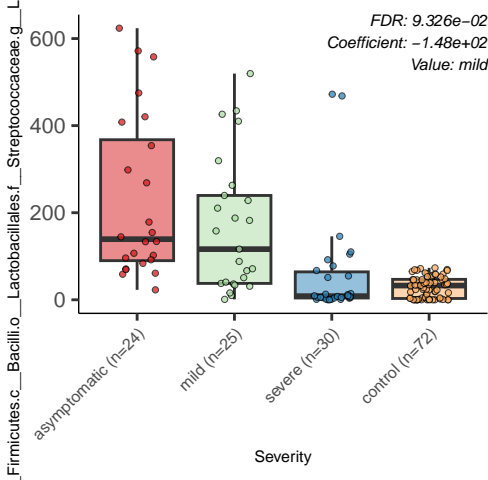

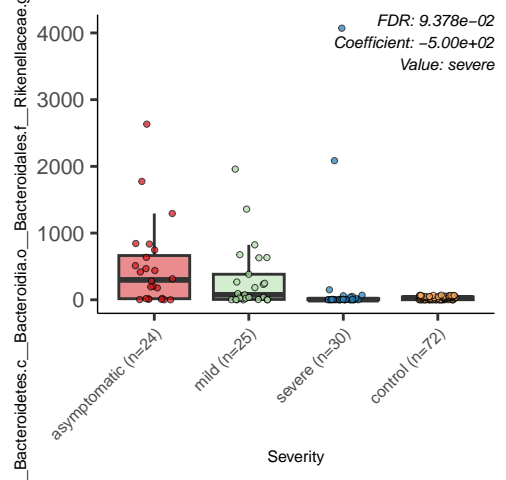

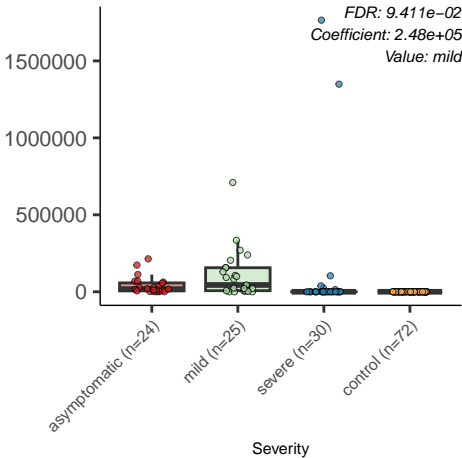

bacteria.p\_Firmicutes.c\_Clostridia.o\_Eubacteriales.f\_Lachnospir

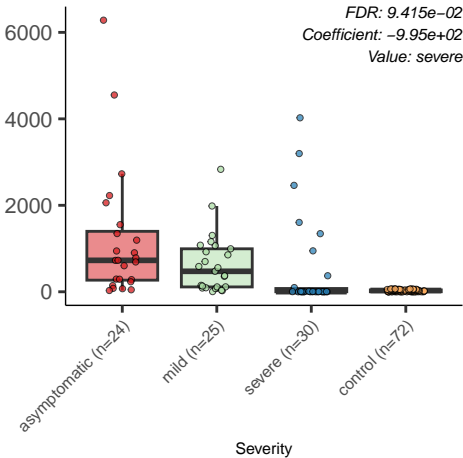

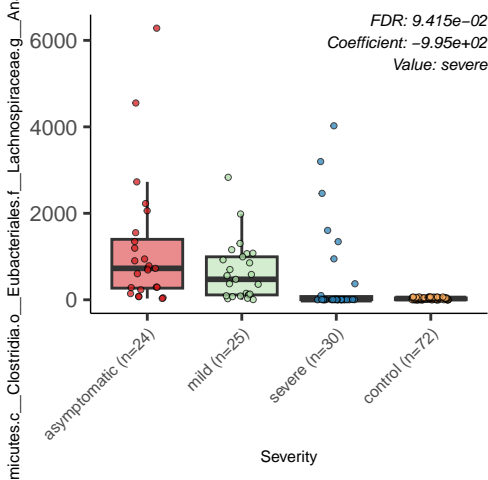

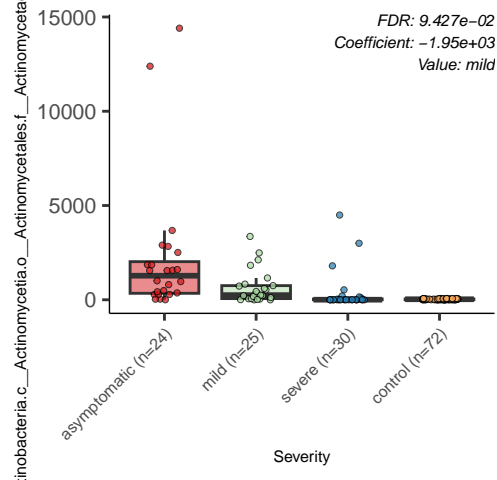

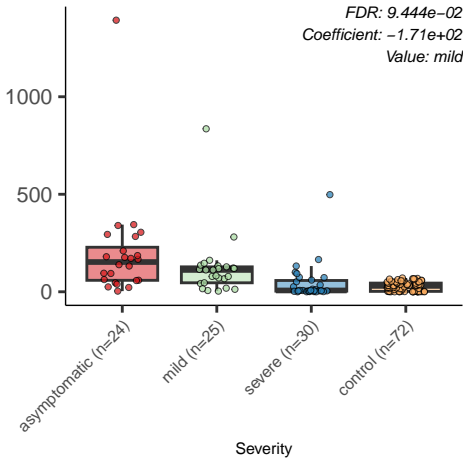

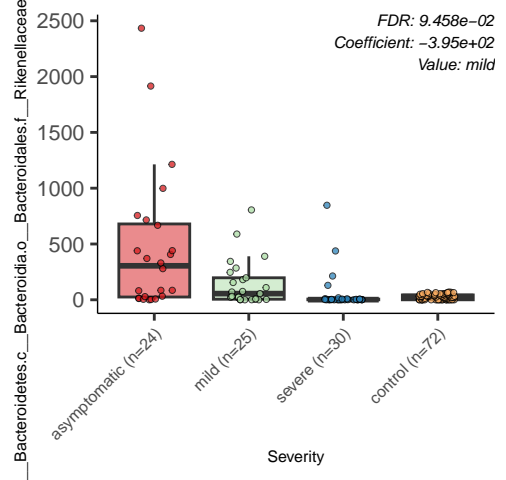



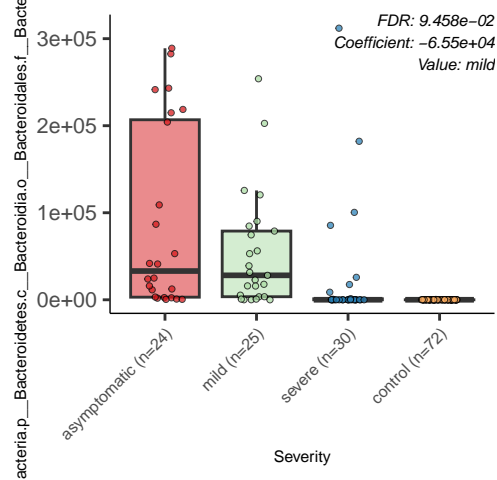

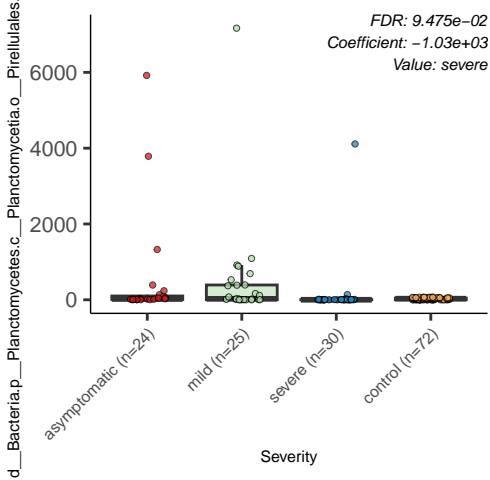

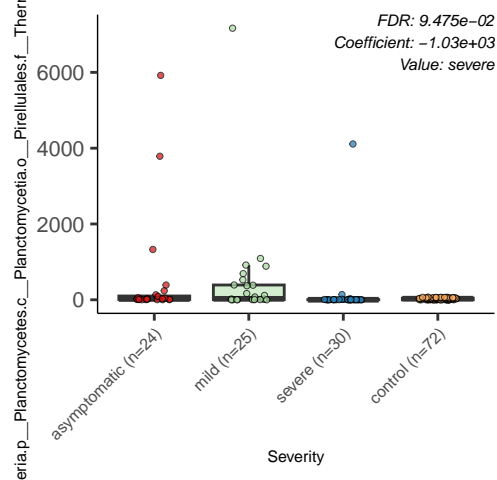

ctomycetes.c\_\_Planctomycetia.o\_\_Pirellulales.f\_\_Thermoguttaceae.

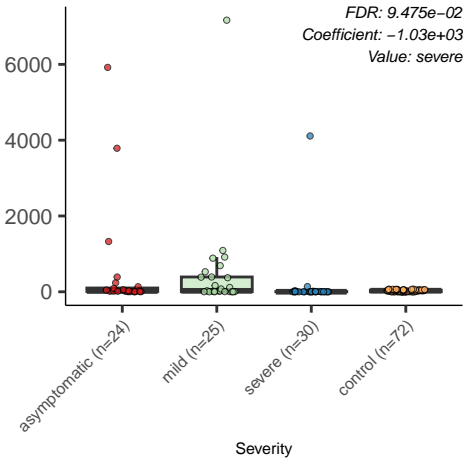

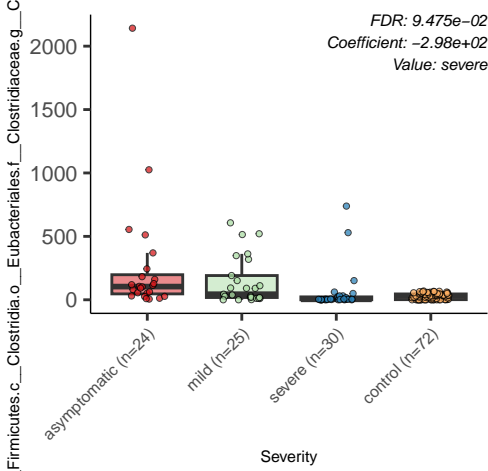

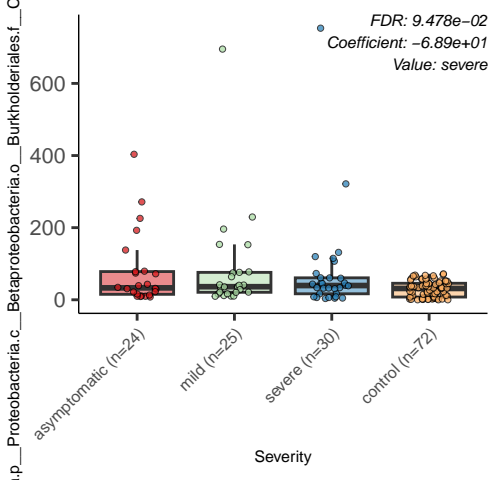

Proteobacteria.c\_\_Gammaproteobacteria.o\_\_Pasteurellales.f\_\_P

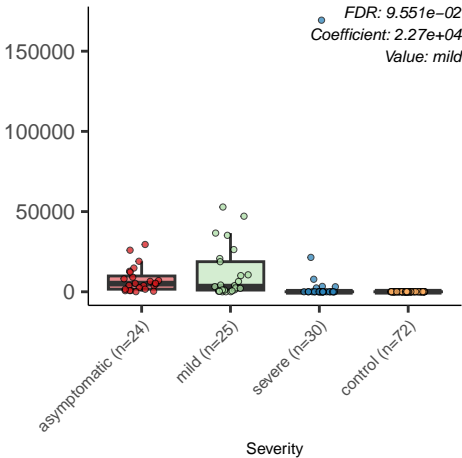

tes.c\_\_Clostridia.o\_\_Eubacteriales.f\_\_Oscillospiraceae.g\_\_Caproicib

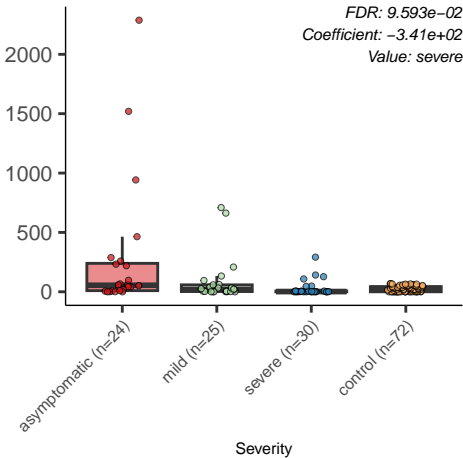



d\_Bacteria.p\_\_Proteobacteria.c\_\_Alphaproteobacteria.o\_\_R

10000

5000

0

asymptomatic (n=24)

mild (n=25)

severe (n=30)

control (n=72)

Severity

FDR:  $9.594e-02$

Coefficient:  $-1.67e+03$

Value: mild

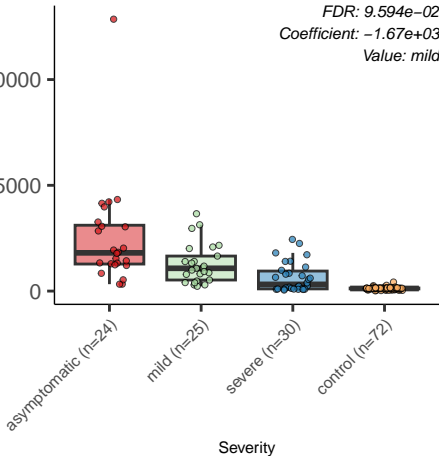

ria.c\_\_Thermoleophila.o\_\_Solirubrobacterales.f\_\_Conexibacteraceae

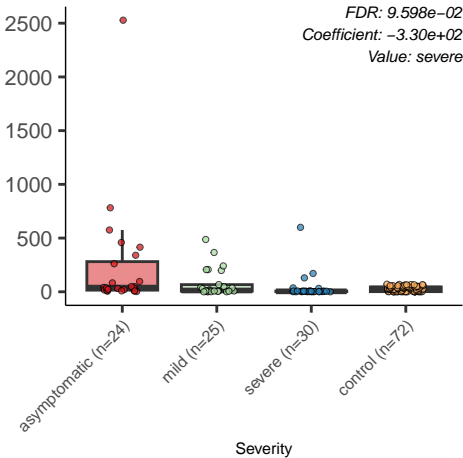

a.c.\_Gammaproteobacteria.o\_Pseudomonadales.f\_Pseudomonas

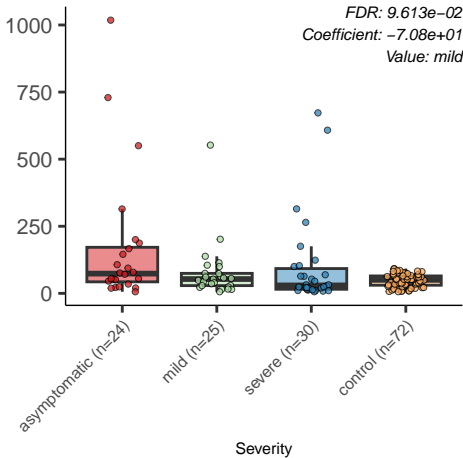

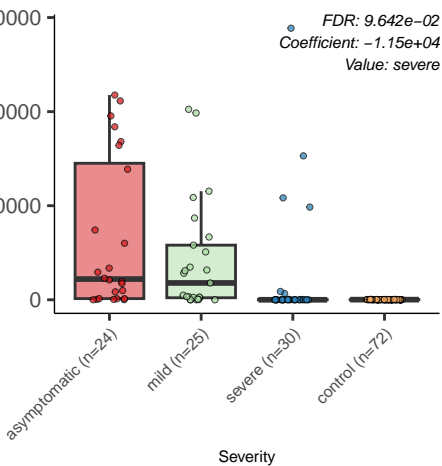

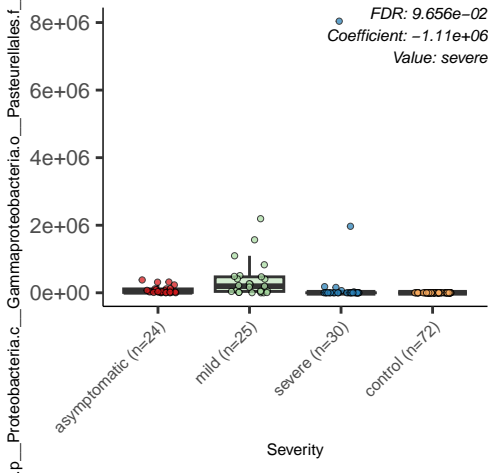

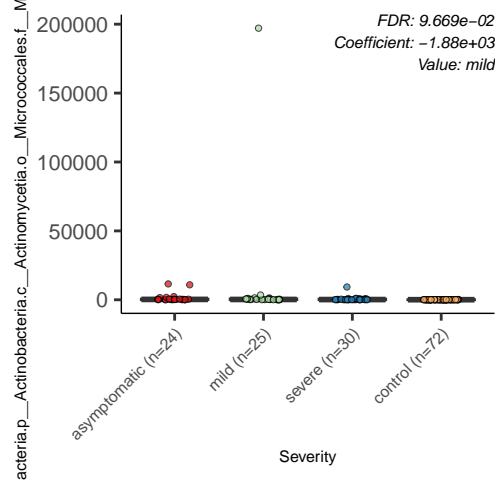

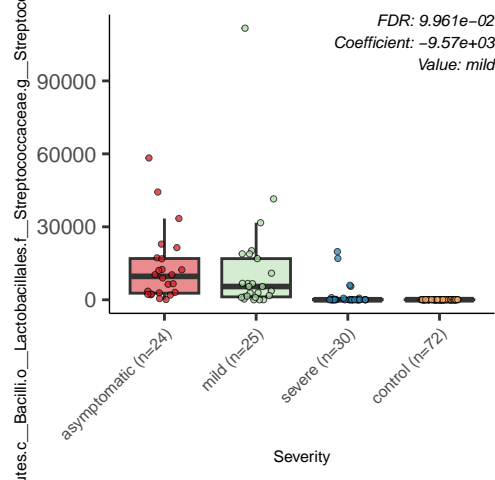

a.p.\_Proteobacteria.c.\_Alphaproteobacteria.o.\_Rickettsiales.f.\_An

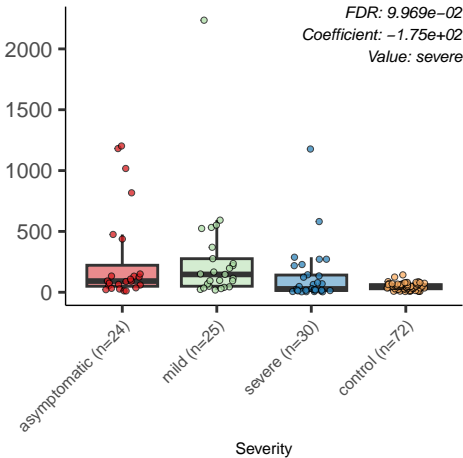



Firmicutes.c\_\_Bacilli.o\_\_Lactobacillales.f\_\_Streptococcaceae.g\_\_Str

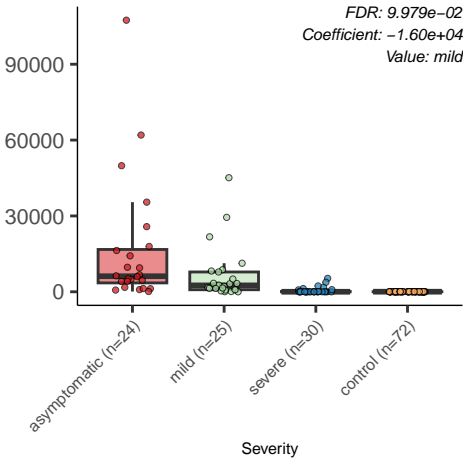

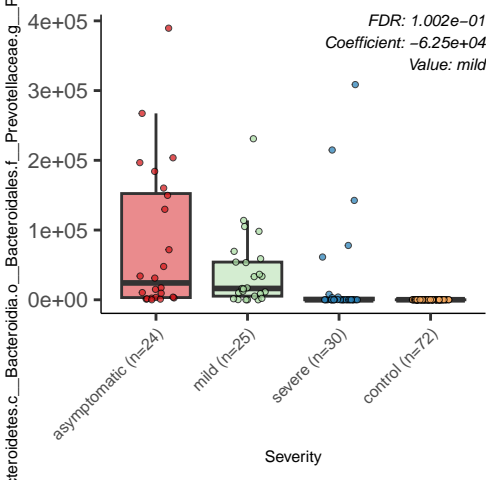

acteria.c\_\_Gammaproteobacteria.o\_\_Pasteurellales.f\_\_Pasteurella

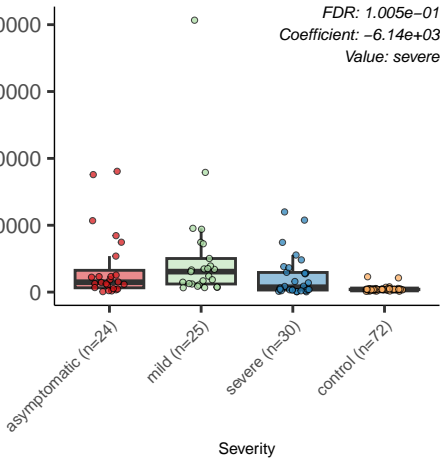

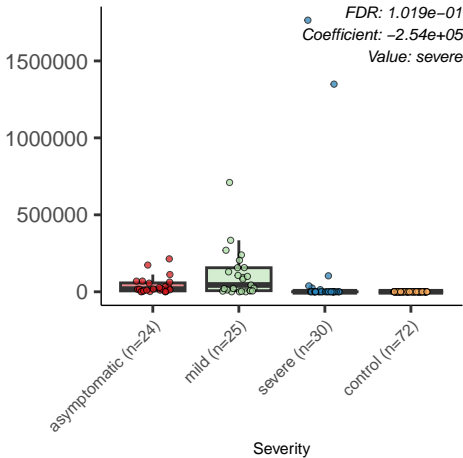

Firmicutes.c\_\_Bacilli.o\_\_Lactobacillales.f\_\_Carnobacteriaceae.g\_\_G

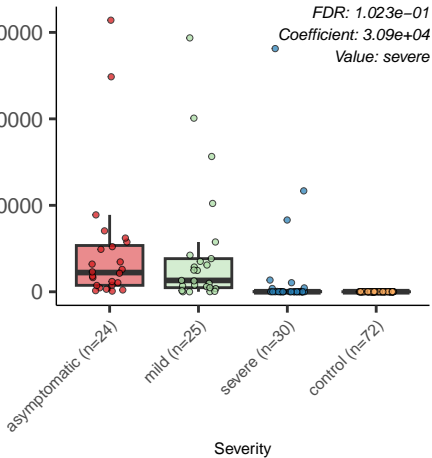

acteria.c\_\_Fusobacteriia.o\_\_Fusobacteriales.f\_\_Fusobacteriaceae.g

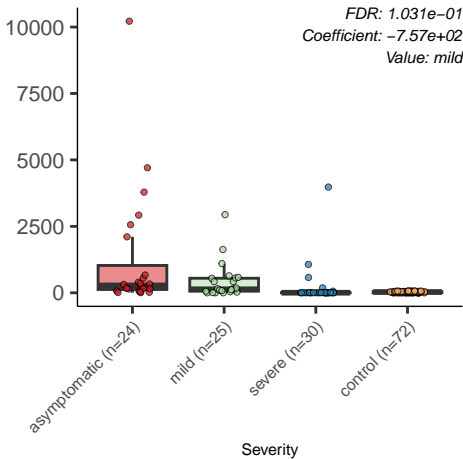

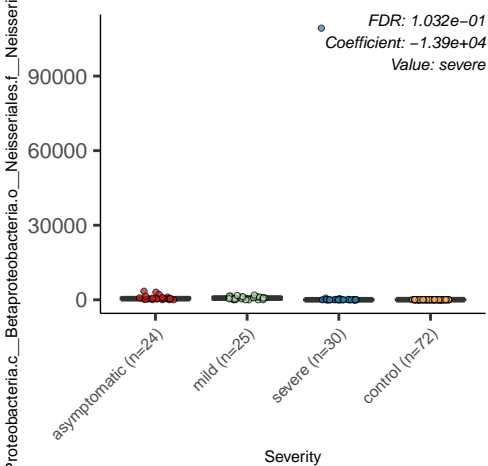

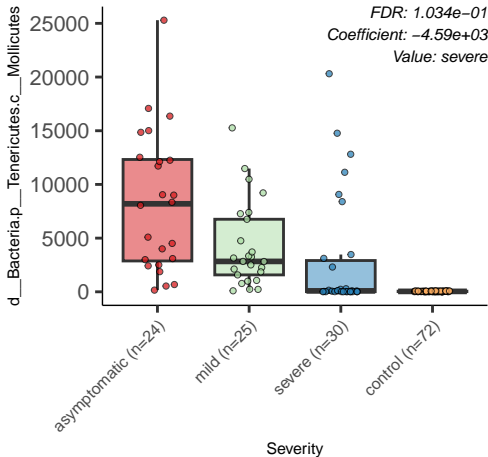



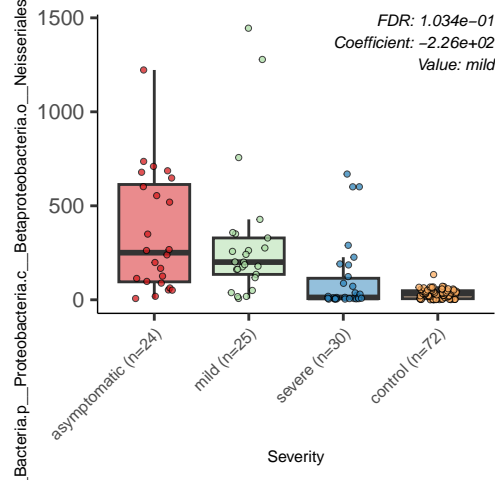

Bacteroidetes.c\_Bacteroidia.o\_Bacteroidales.f\_Bacteroidaceae.

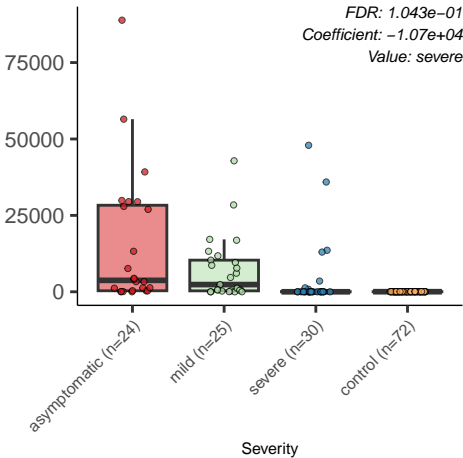

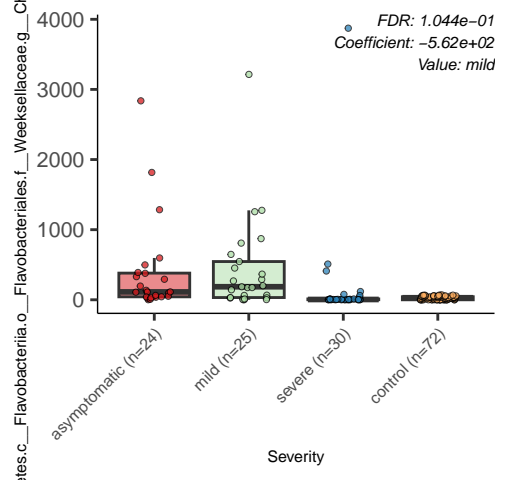

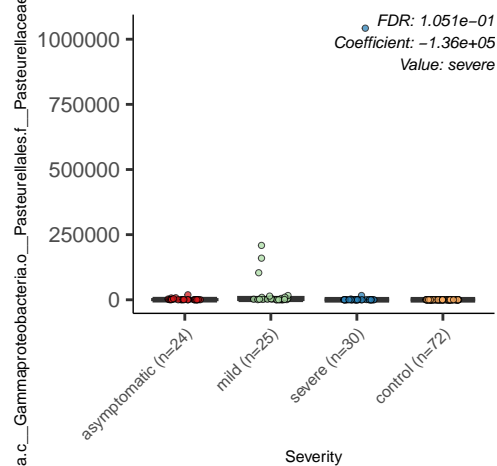

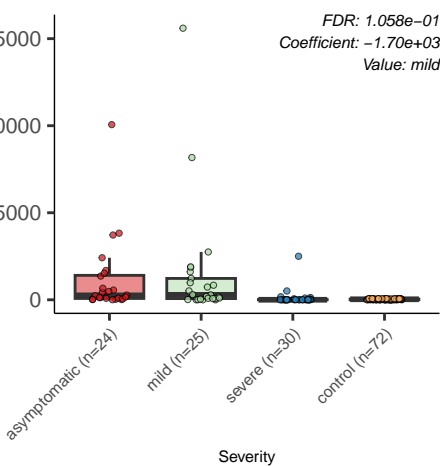

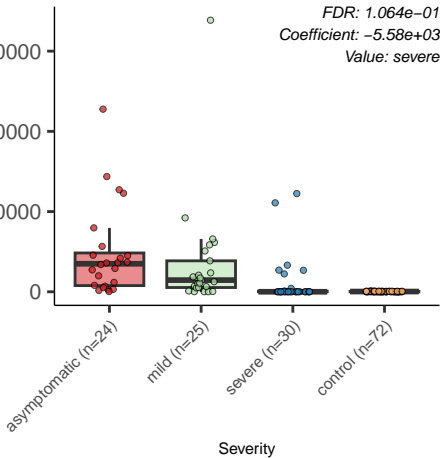

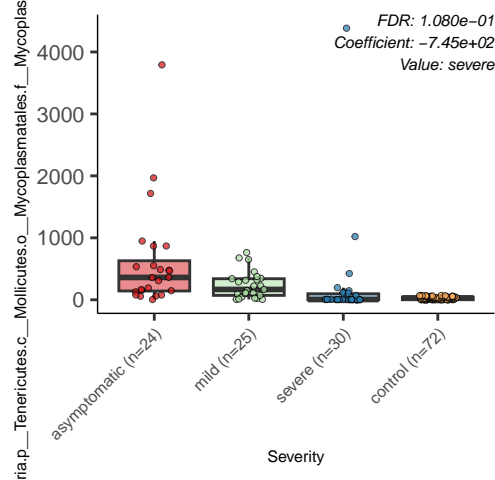

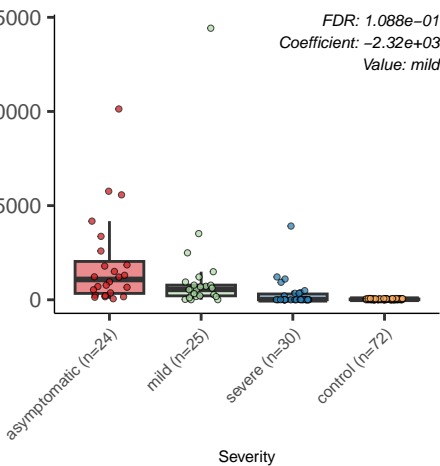



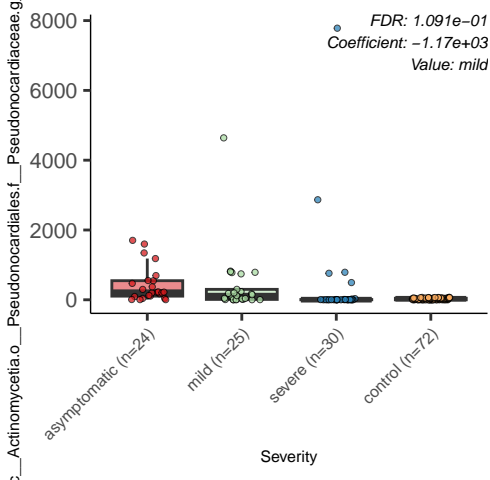

bacteria.p\_\_Proteobacteria.c\_\_Gammaproteobacteria.o\_\_Vibrionales

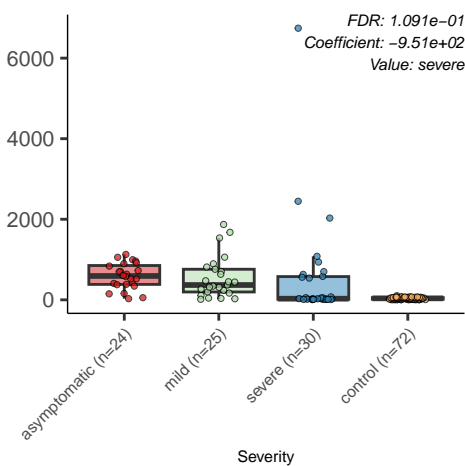

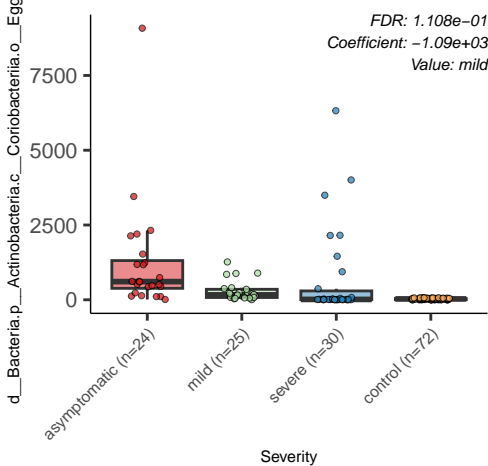

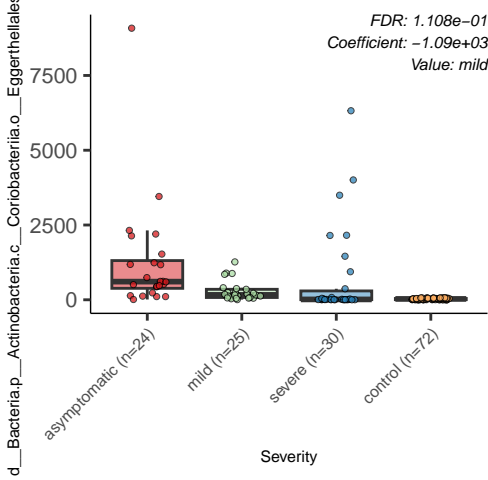

o\_Proteobacteria.c\_Gammaproteobacteria.o\_Thiotrichales.f\_Pi

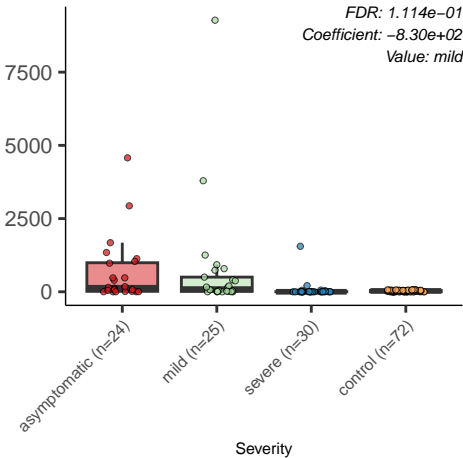

acteria.p\_\_Firmicutes.c\_\_Bacilli.o\_\_Bacillales.f\_\_Bacillaceae.g\_\_Ba

FDR:  $1.114 \times 10^{-1}$   
Coefficient:  $-5.89 \times 10^2$   
Value: mild

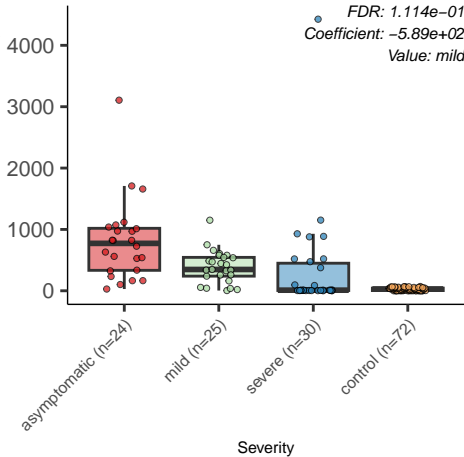

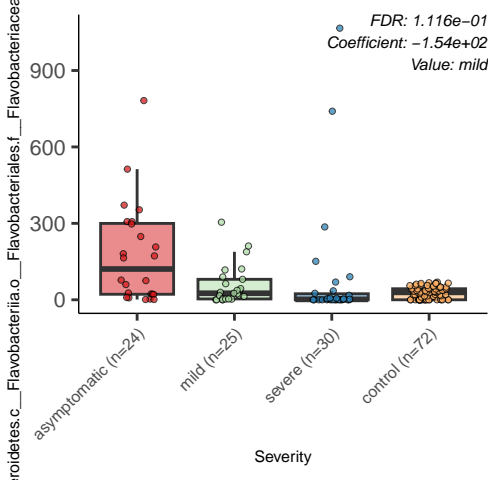

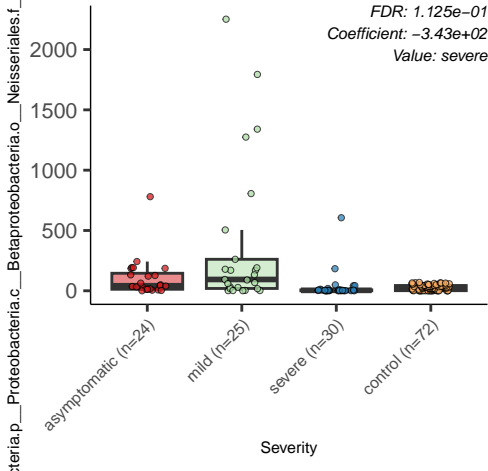



Proteobacteria.c\_\_Betaproteobacteria.o\_\_Neisseriales.f\_\_Neisseria

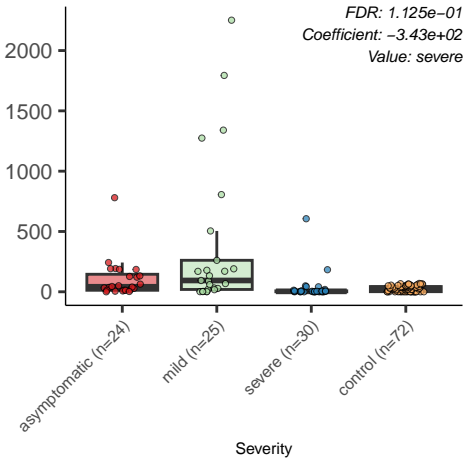

Bacteroidetes.c\_\_Bacteroidia.o\_\_Bacteroidales.f\_\_Prevotellaceae.g

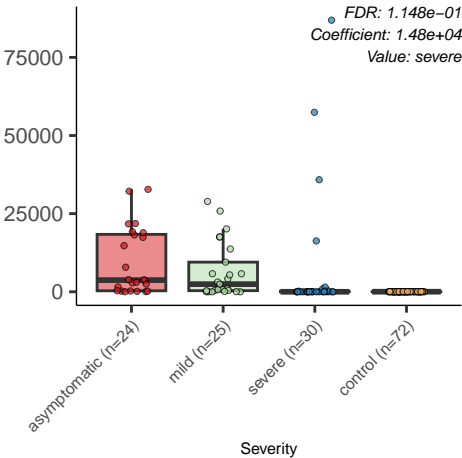

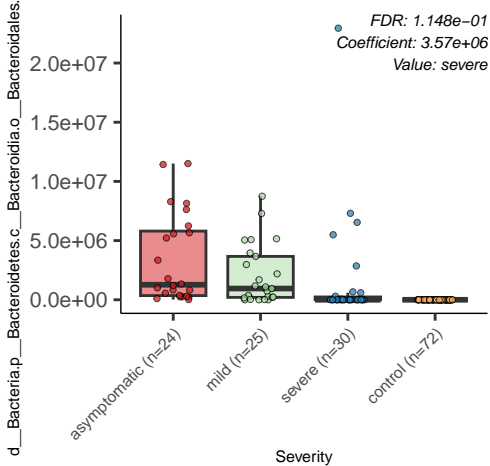

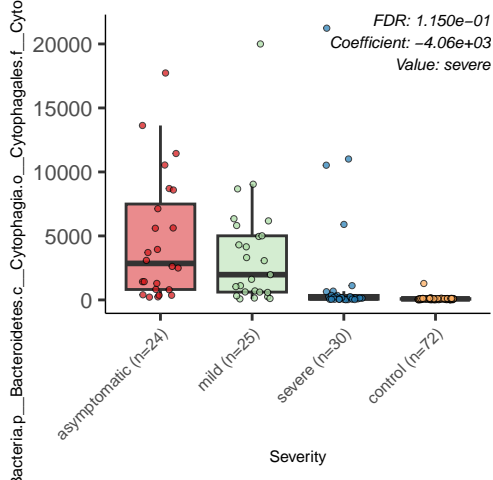

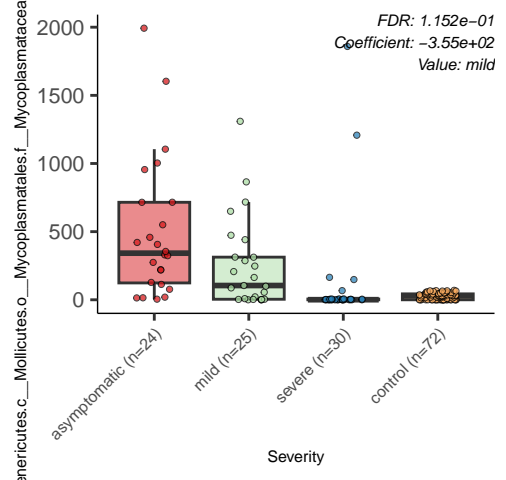

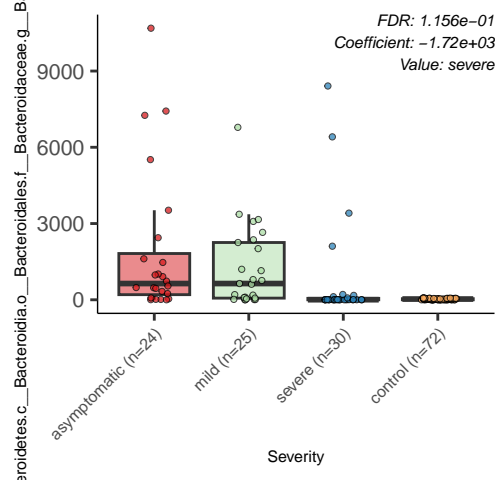

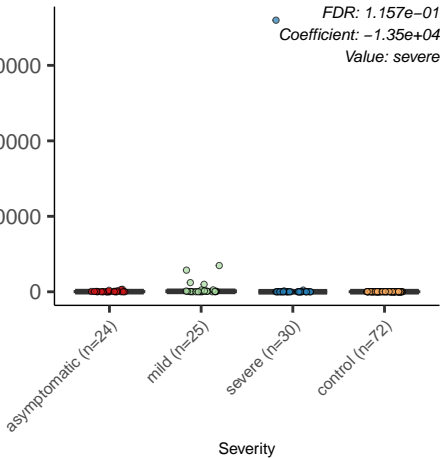

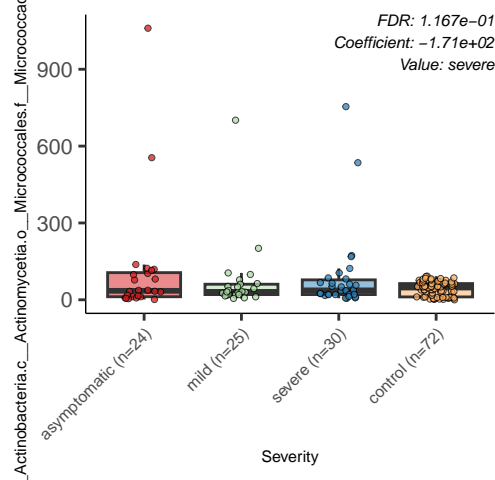



p\_Firmicutes.c\_Clostridia.o\_Eubacteriales.f\_Clostridiaceae.g

FDR: 1.179e-01  
Coefficient: -2.35e+03  
Value: severe

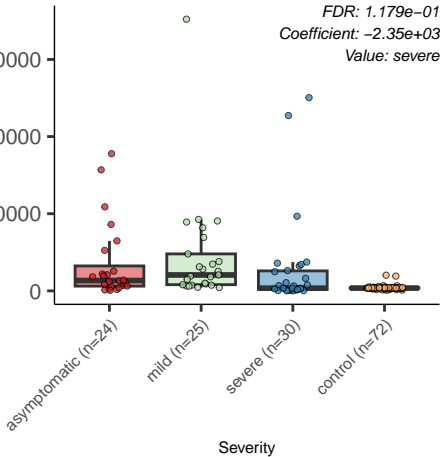

a.p.\_Proteobacteria.c\_Alphaproteobacteria.o\_Hyphomicrobiales.

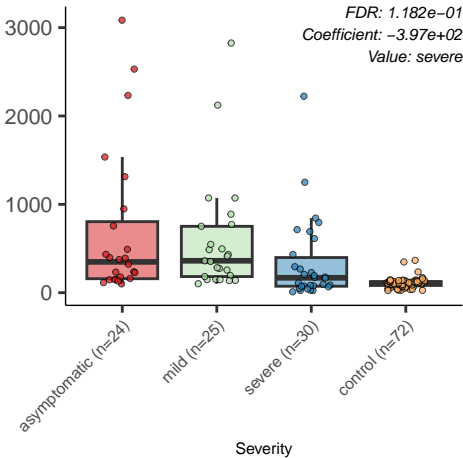

Bacteria.p\_\_Proteobacteria.c\_\_Alphaproteobacteria.o\_\_Rickettsia

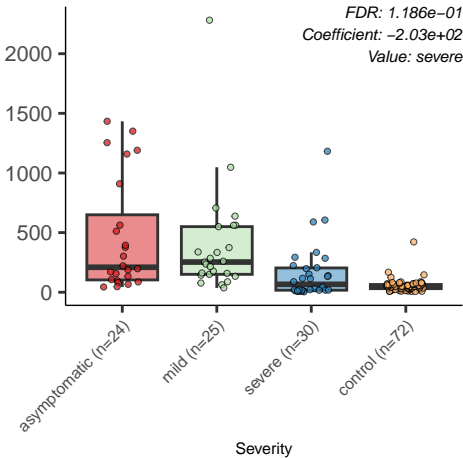

d\_Bacteria.p\_Spirochaetes.c\_Spirochaetia.o\_Spirochaetales.

FDR:  $1.192e-01$   
Coefficient:  $-1.58e+02$   
Value: severe

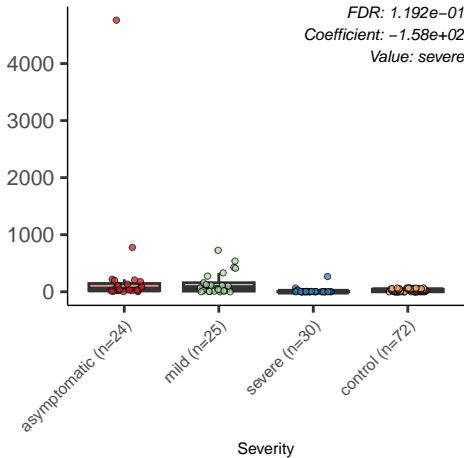

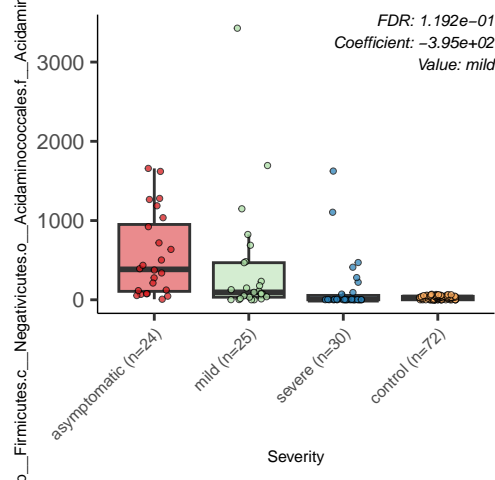

tes.c\_Bacteroidia.o\_Bacteroidales.f\_Porphyromonadaceae.g

*FDR: 1.199e-01*  
*Coefficient: -4.95e+04*  
*Value: mild*

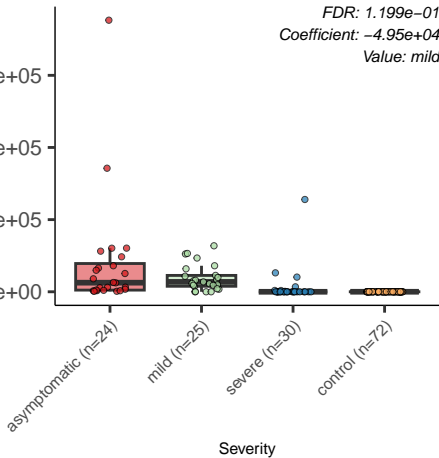

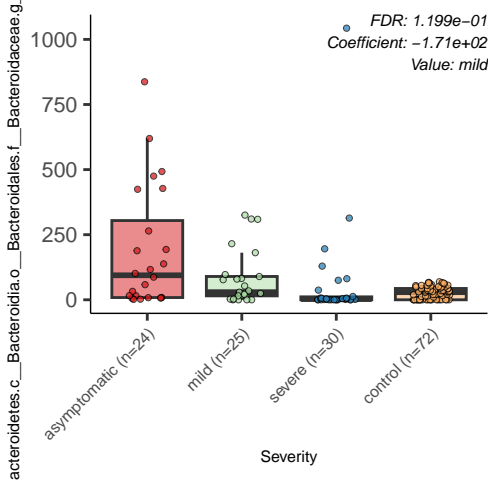

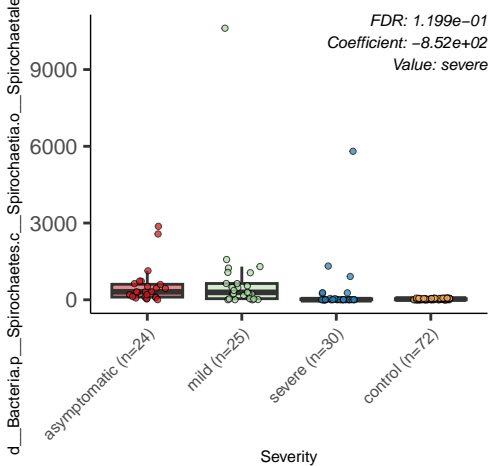



d\_Bacteria.p\_Bacteroidetes.c\_Cytophagia.o\_Cytophagales.

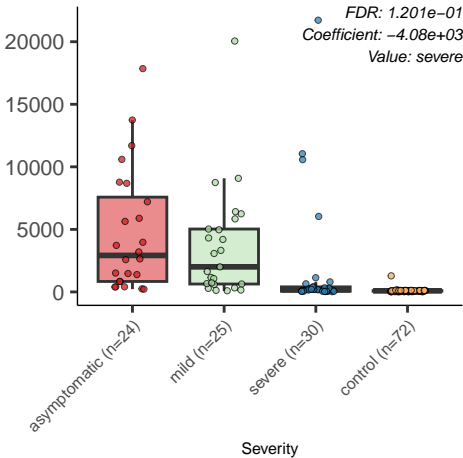

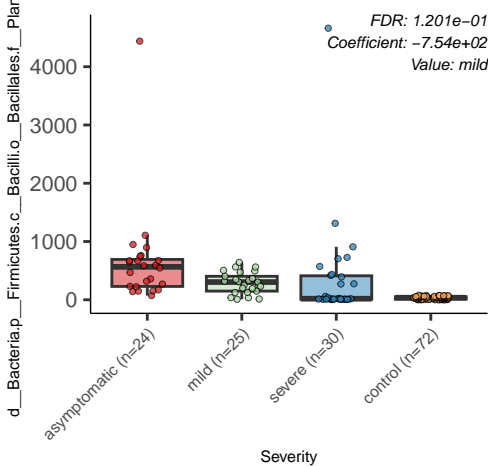

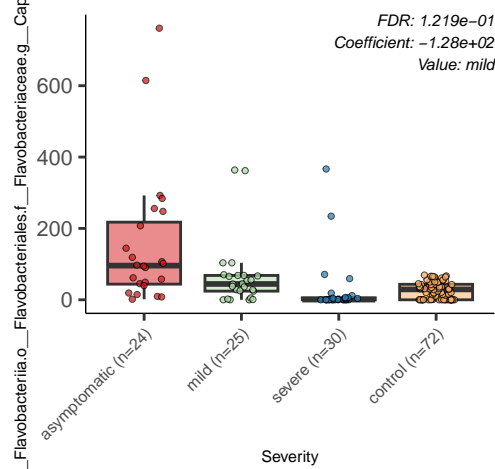

oteobacteria.c\_\_Betaproteobacteria.o\_\_Neisseriales.f\_\_Neisseriace

FDR: 1.221e-01  
Coefficient: -2.40e+02  
Value: severe

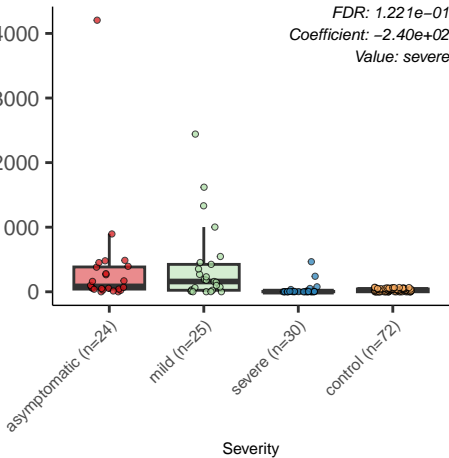

.c\_\_Flavobacteriia.o\_\_Flavobacteriales.f\_\_Weeksellaceae.g\_\_Eliza

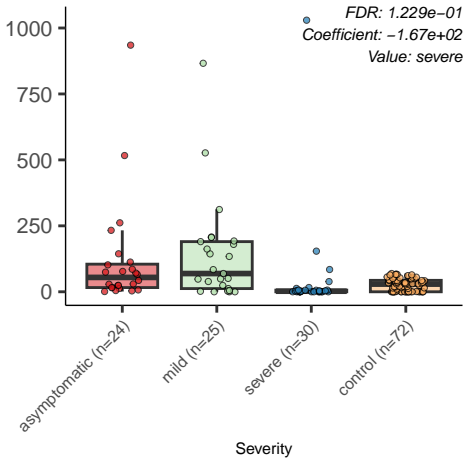

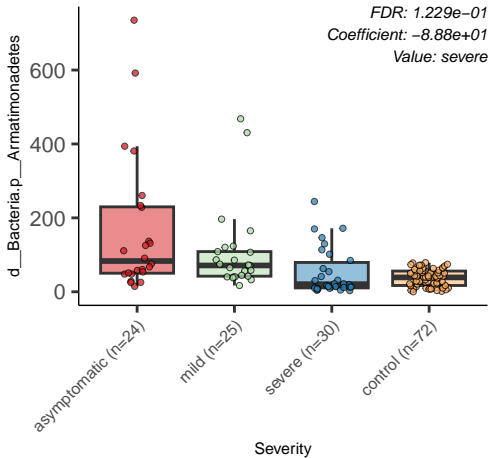

inobacteria.c\_Actinomycetia.o\_Actinomycetales.f\_Actinomycetia

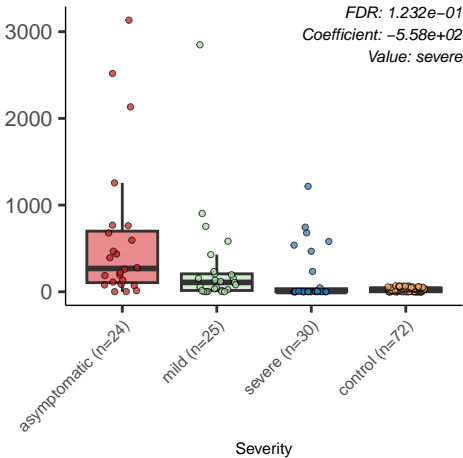

Firmicutes.c\_\_Clostridia.o\_\_Eubacteriales.f\_\_Lachnospiraceae.g

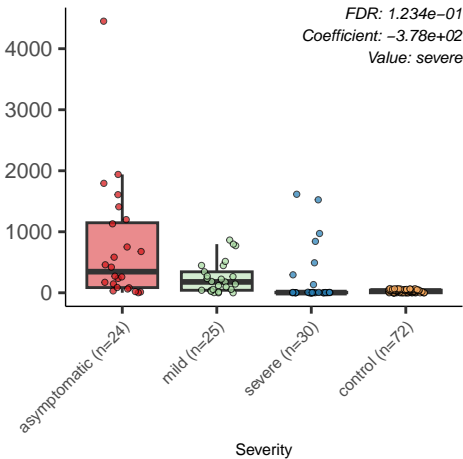



bacteria.p\_\_Firmicutes.c\_\_Clostridia.o\_\_Eubacteriales.f\_\_Oscillospira

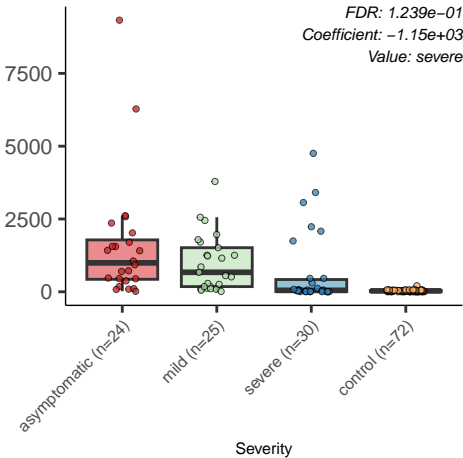

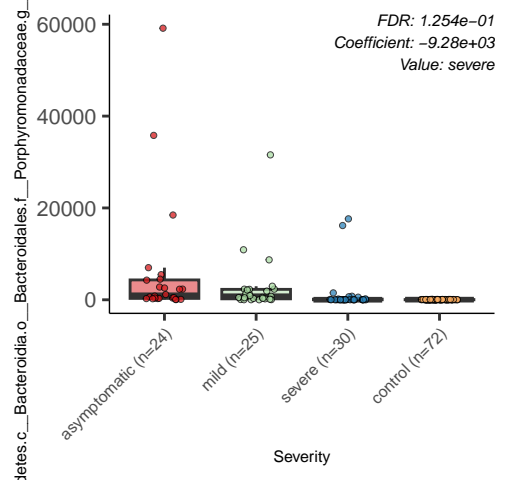

rmicutes.c\_\_Clostridia.o\_\_Eubacteriales.f\_\_Lachnospiraceae.g\_\_Bu

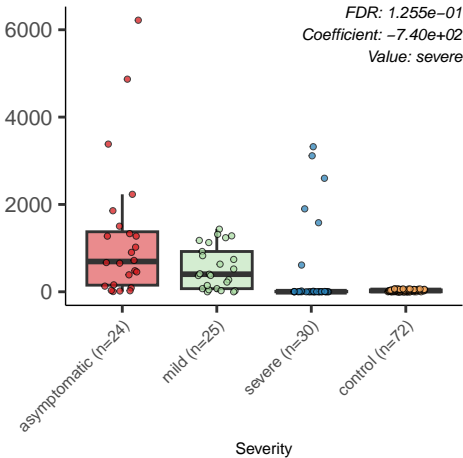

bacteria.c\_\_Betaproteobacteria.o\_\_Neisseriales.f\_\_Neisseriaceae.g

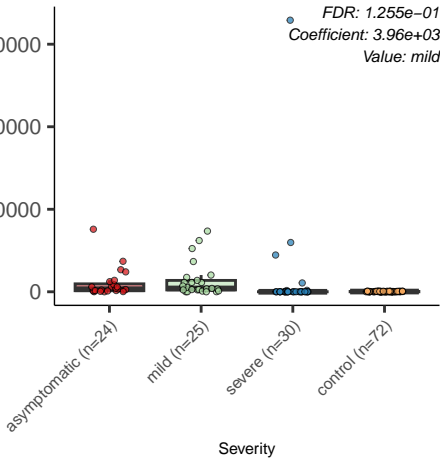

Firmicutes.c\_\_Clostridia.o\_\_Eubacteriales.f\_\_Clostridiaceae.g\_\_

1000

500

0

*FDR: 1.268e-01*  
*Coefficient: -1.98e+02*  
*Value: severe*

asymptomatic (n=24)

mild (n=25)

severe (n=30)

control (n=72)

Severity

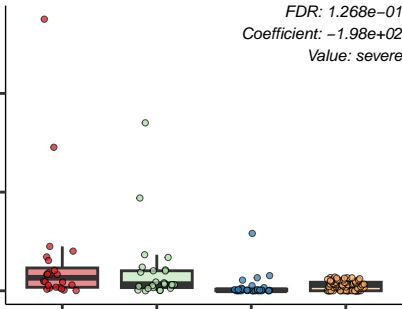

o\_Firmicutes.c\_\_Negativicutes.o\_\_Veillonellales.f\_\_Veillonellaceae.

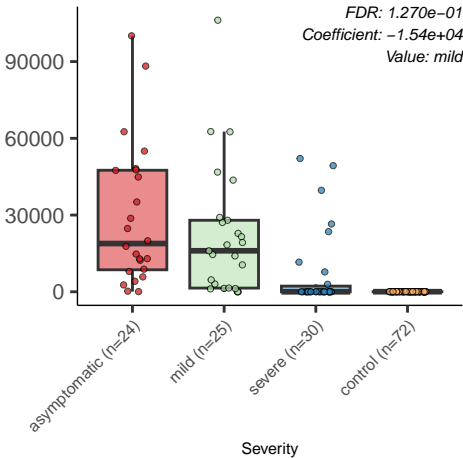

Gammaproteobacteria.o\_Pasteurellales.f\_Pasteurellaceae.g

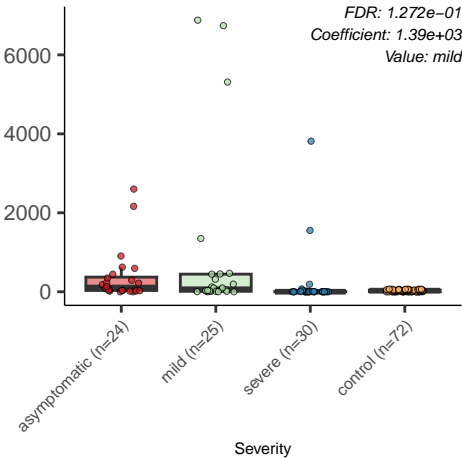

d\_Bacteria.p\_Chloroflexi.c\_Dehalococcoid

FDR: 1.276e-01  
Coefficient: -7.67e+02  
Value: mild

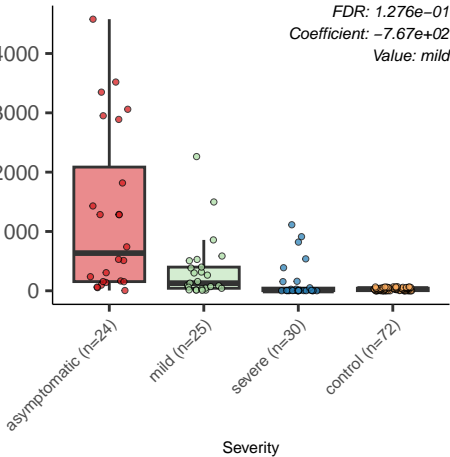



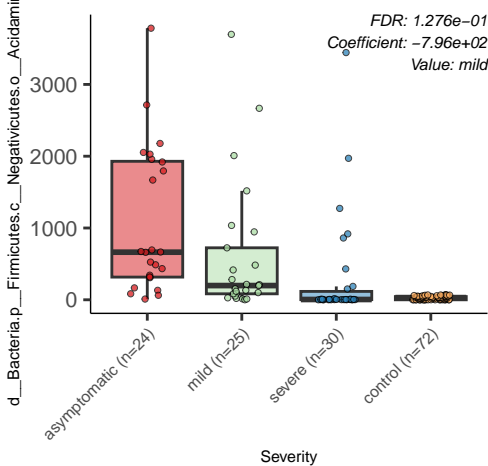

Bacteria.p\_Firmicutes.c\_Negativicutes.o\_Acidaminococcales.f

FDR: 1.276e-01  
Coefficient: -7.96e+02  
Value: mild

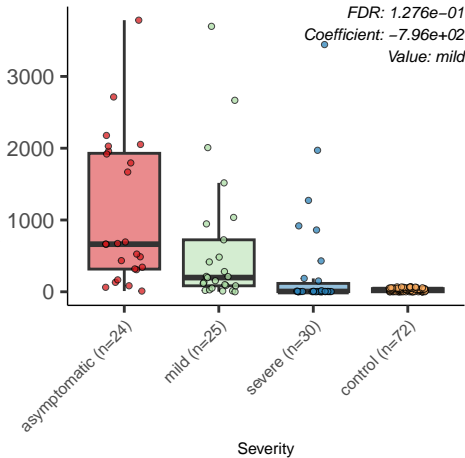

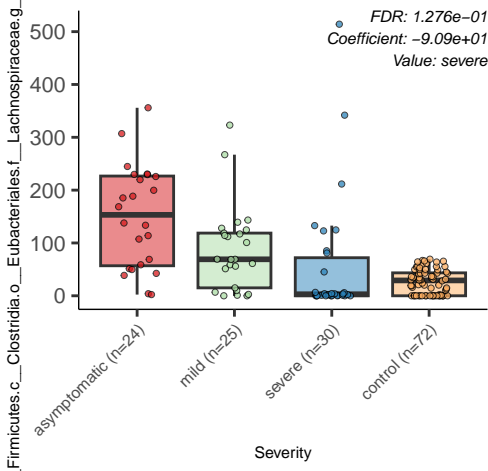

Bacteria.p\_\_Proteobacteria.c\_\_Gammaproteobacteria.o\_\_Thiotricha

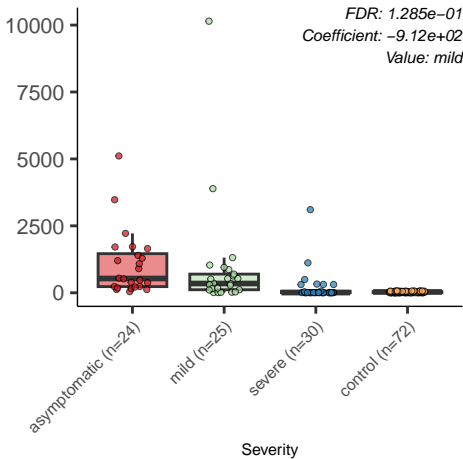

d\_\_Bacteria.p\_Actinobacteria.c\_Actinomycetia.o\_Coryn

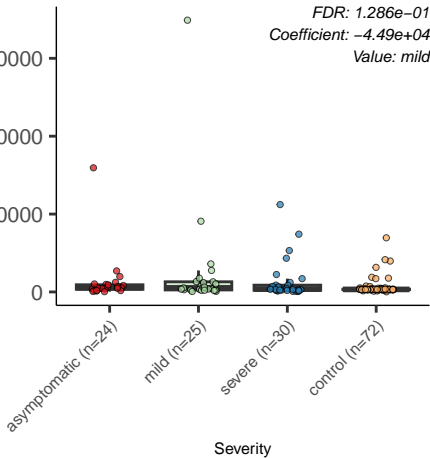

d\_Bacteria

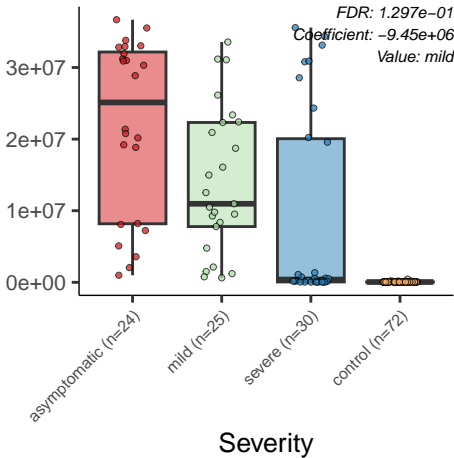

d\_Bacteria.p\_Firmicutes.c\_Tissierella.g\_Ezakiella.s\_Eza

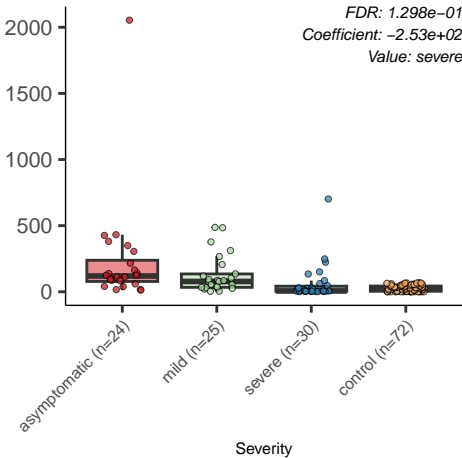

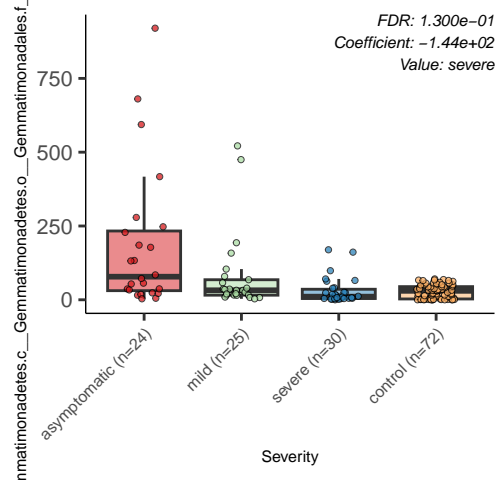



c\_Gemmatimonadetes.o\_Gemmatimonadales.f\_Gemmatimonad

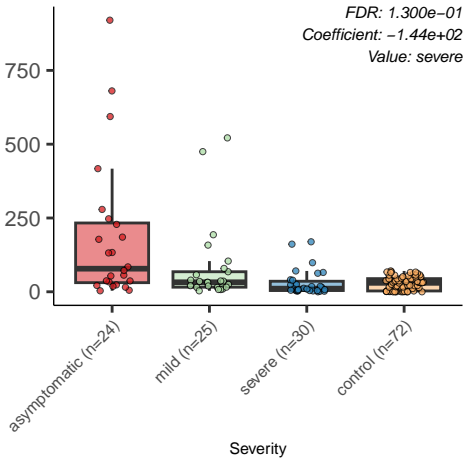

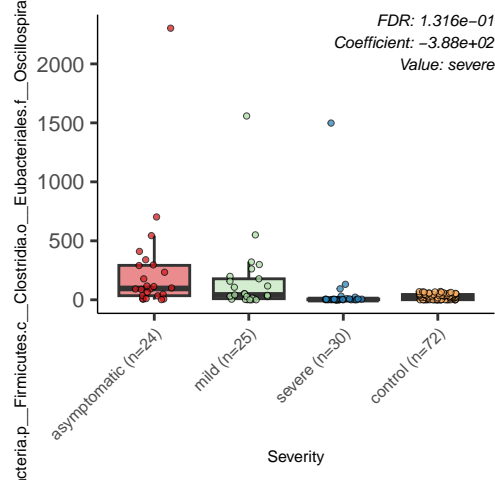

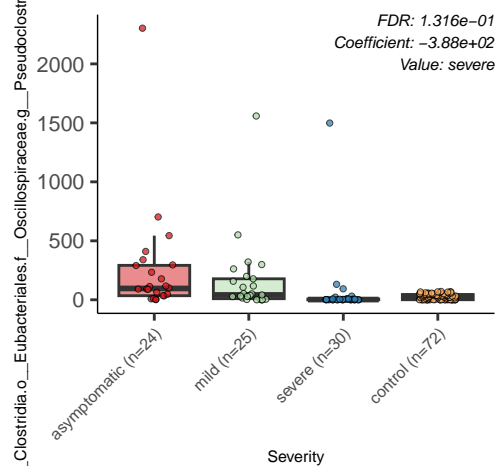

tes.c\_Flavobacteriia.o\_Flavobacteriales.f\_Weeksellaceae.g\_CH

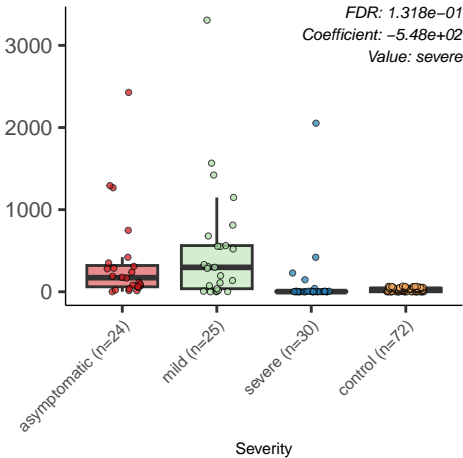

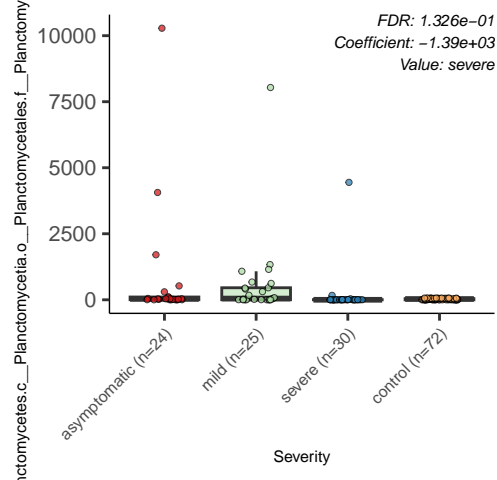

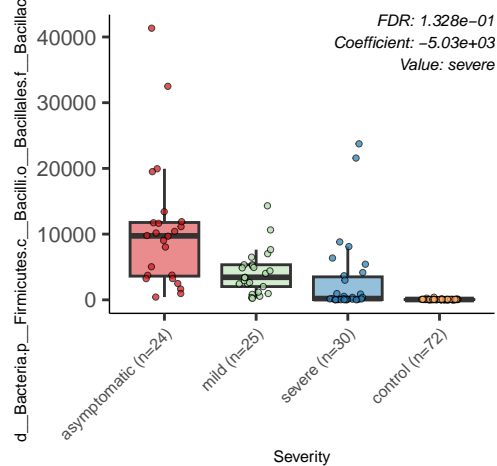

bacteria.p\_Firmicutes.c\_Bacilli.o\_Bacillales.f\_Thermoactinomyces

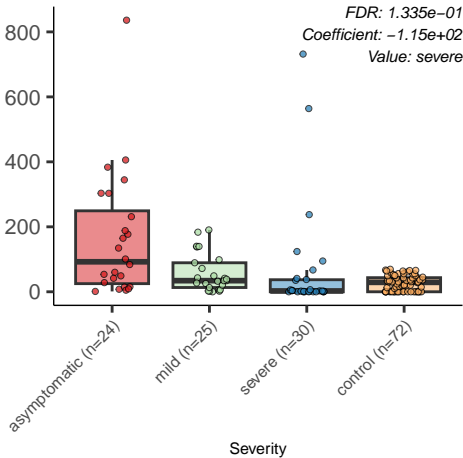

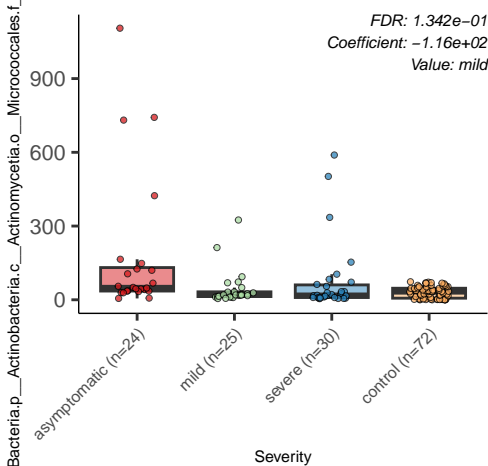



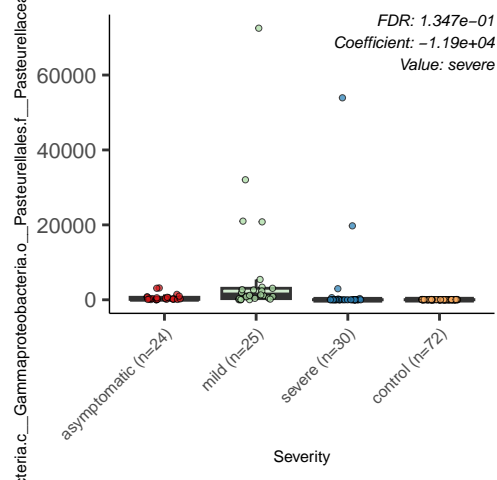

d\_Bacteria.p\_\_Chloroflexi.c\_\_Dehalococcoidia.o\_\_Dehalo

FDR: 1.348e-01  
Coefficient: -7.52e+02  
Value: mild

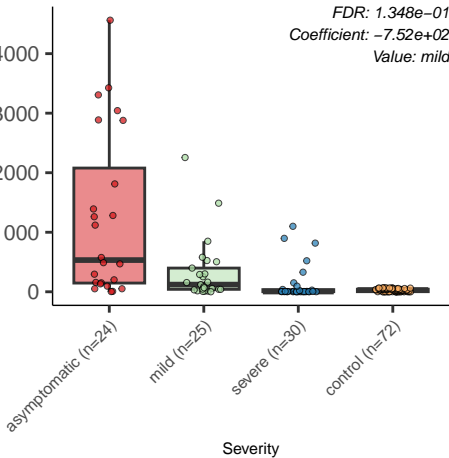

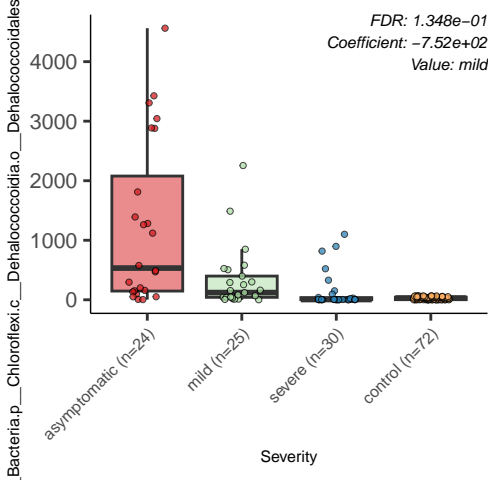

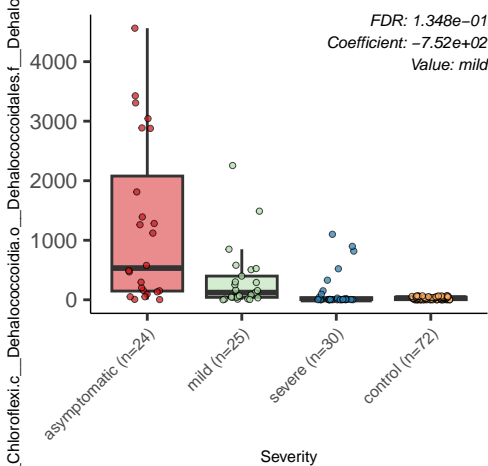

gativicutes.o\_\_Acidaminococcales.f\_\_Acidaminococcaceae.g\_\_Pha

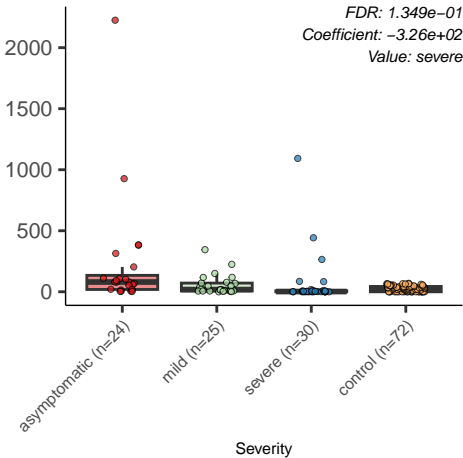

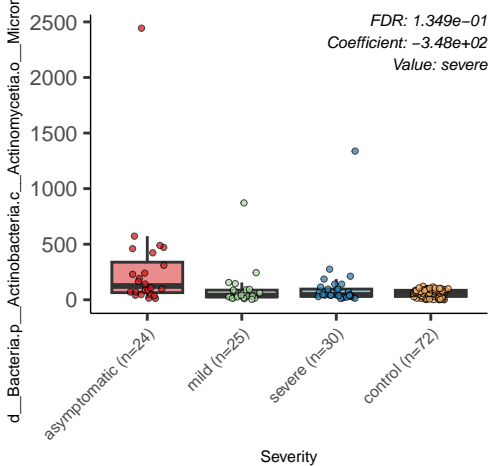

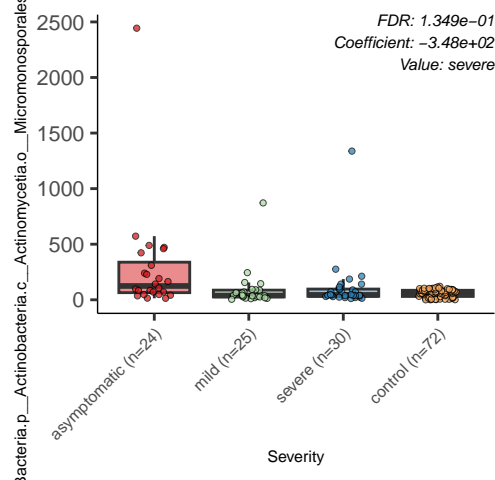

Bacteroidetes.c\_Bacteroidia.o\_Bacteroidales.f\_Bacteroidaceae.

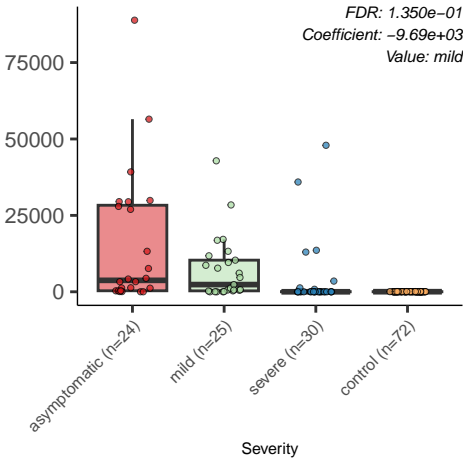



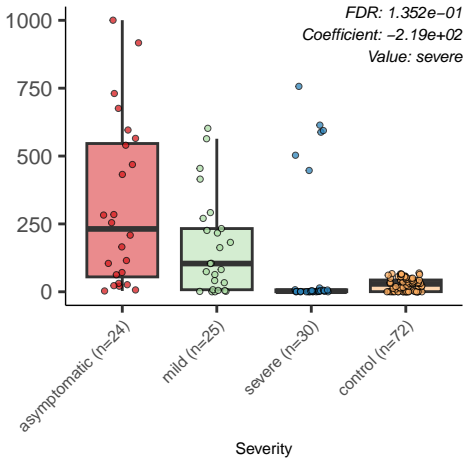

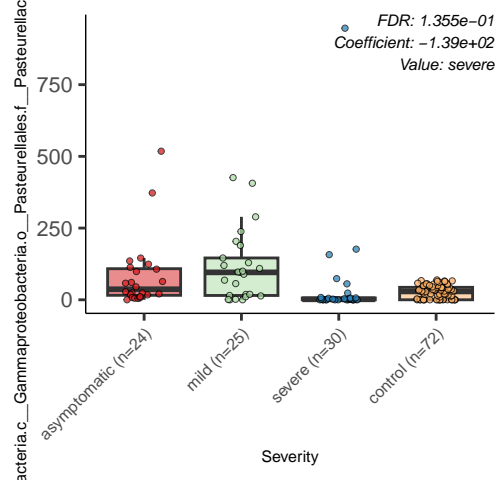

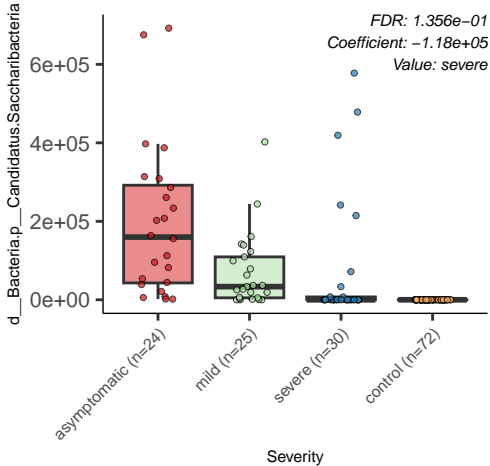

d\_Bacteria.p\_\_Chloroflexi.c\_\_Candidatus.Thermoflexus

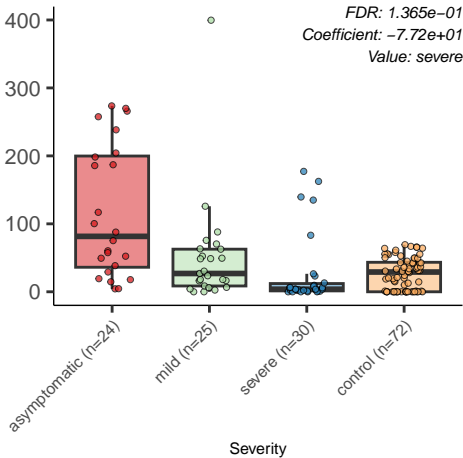

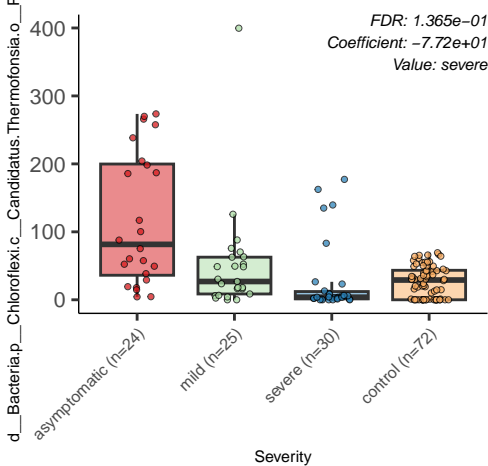

bacteria.p\_\_Chloroflexi.c\_\_Candidatus.Thermofonsia.o\_\_Phototrophic

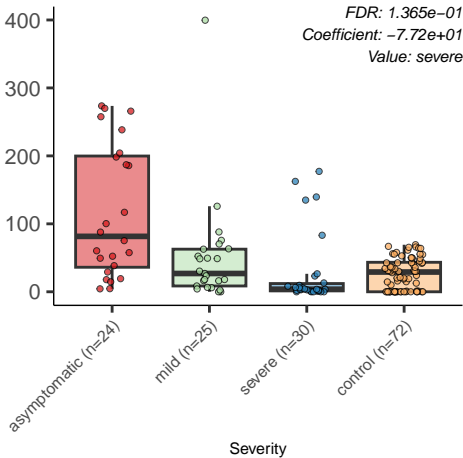

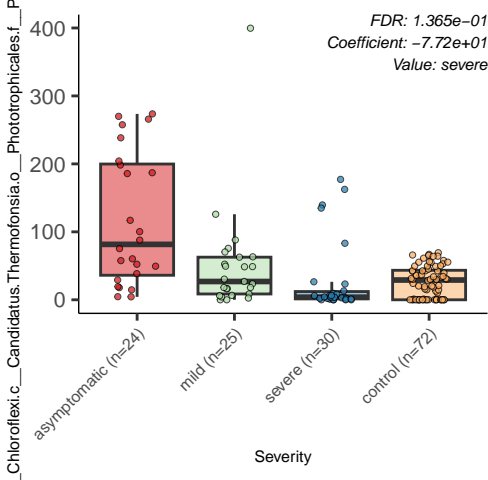

andidatus.Thermofonsia.o\_\_Phototrophicales.f\_\_Phototrophicaceae.

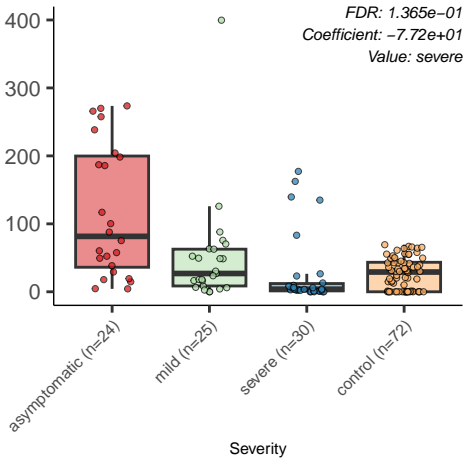



eria.p\_Actinobacteria.c\_Actinomycetia.o\_Micrococcales.f\_Micro

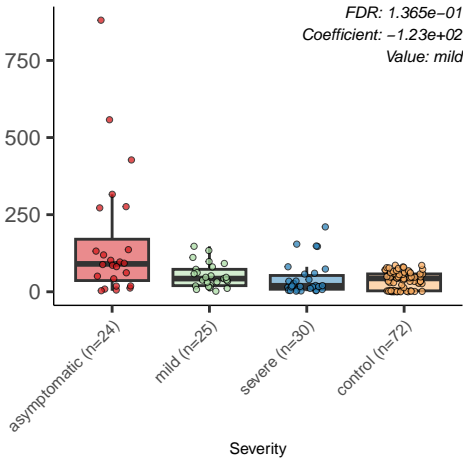

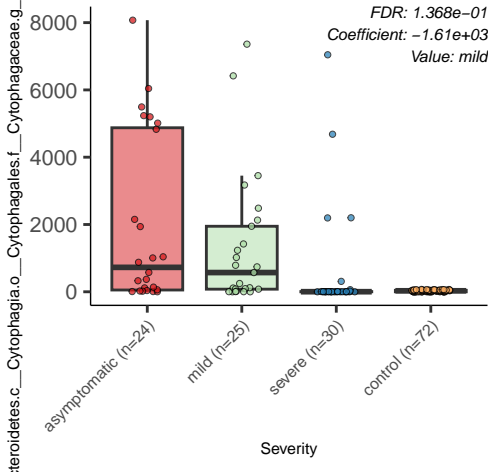

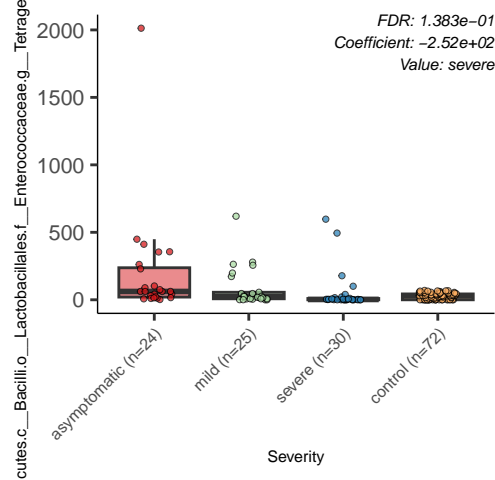

ia.p\_\_Proteobacteria.c\_\_Betaproteobacteria.o\_\_Burkholderiales.f

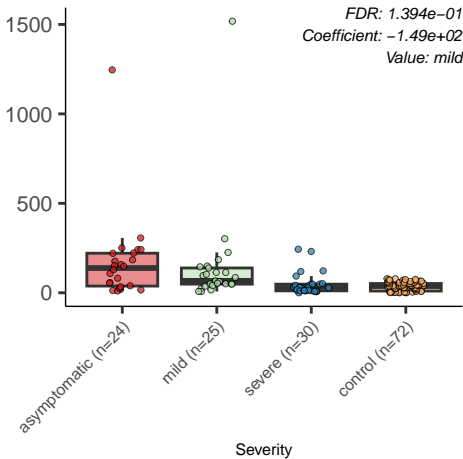

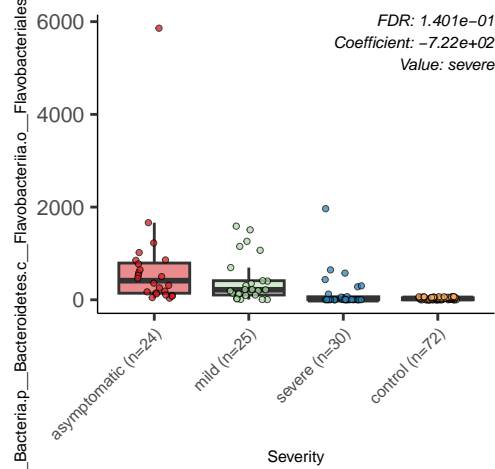

a.p.\_Bacteroidetes.c\_Flavobacteriia.o\_Flavobacteriales.f\_Blatta

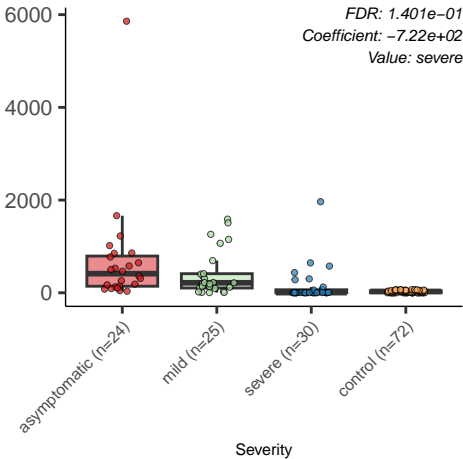

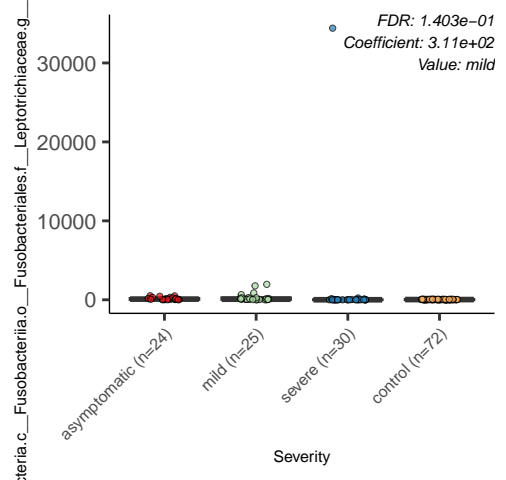

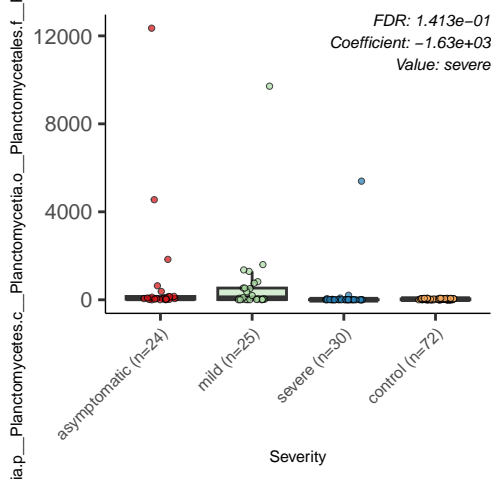



Proteobacteria.c\_\_Betaproteobacteria.o\_\_Neisseriales.f\_\_Neisseria

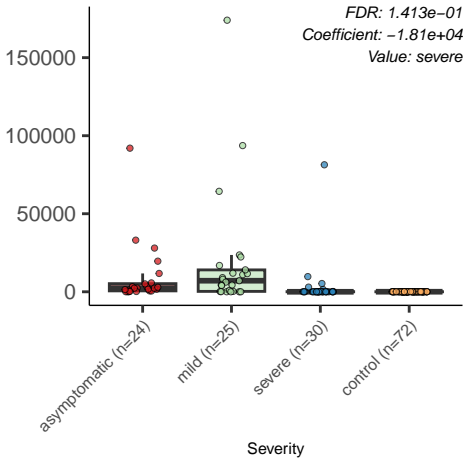

bacteria.c\_\_Fusobacteriia.o\_\_Fusobacteriales.f\_\_Leptotrichiaceae

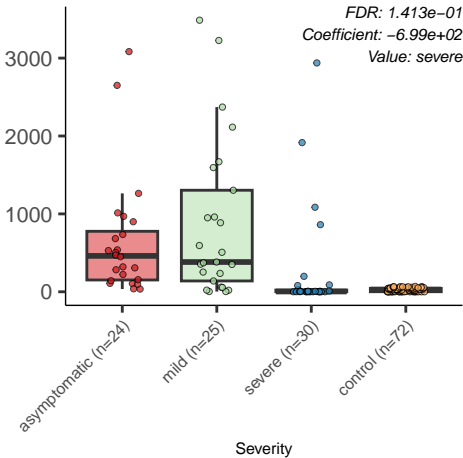

Bacteria.p\_Firmicutes.c\_Clostridia.o\_Eubacteriales.f\_Eubacteri

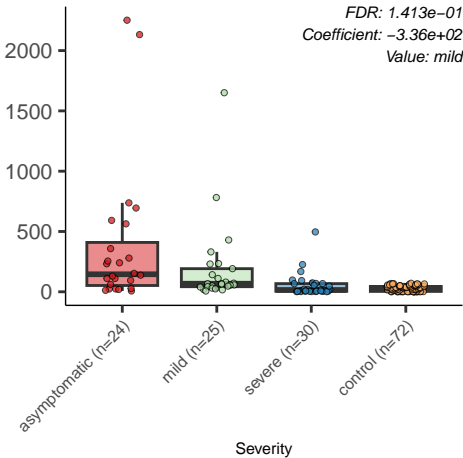

Bacteroidetes.c\_Flavobacteriia.o\_Flavobacteriales.f\_Weeksellaceae

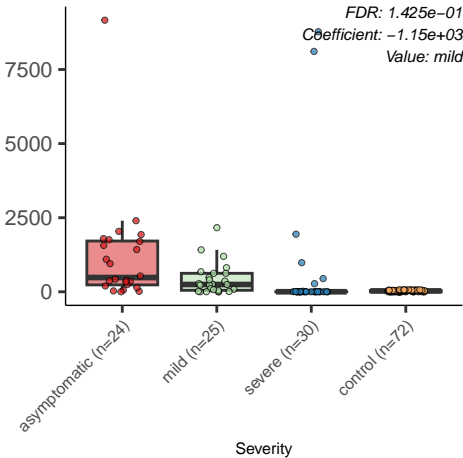

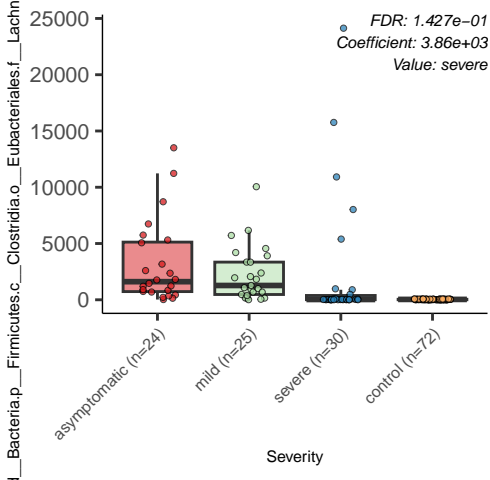

d\_Bacteria.p\_Firmicutes.c\_Bacilli.o\_Bacillales.f\_Alicyc

FDR:  $1.442e-01$   
Coefficient:  $-3.47e+02$   
Value: severe

2000

1000

0

asymptomatic (n=24)

mild (n=25)

severe (n=30)

control (n=72)

Severity

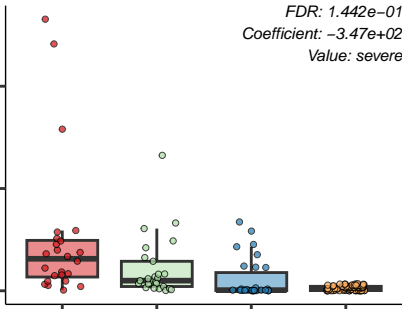

d\_\_Bacteria.p\_\_Candidatus.Saccharibacteria.c\_\_Candidatus.S

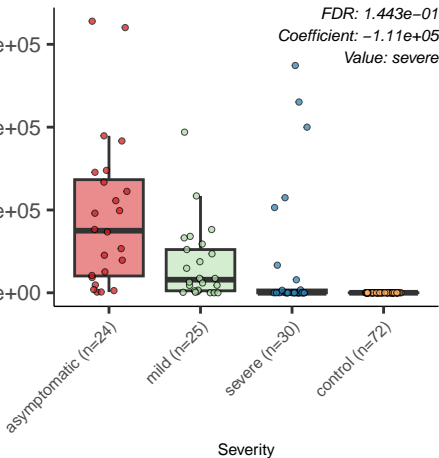

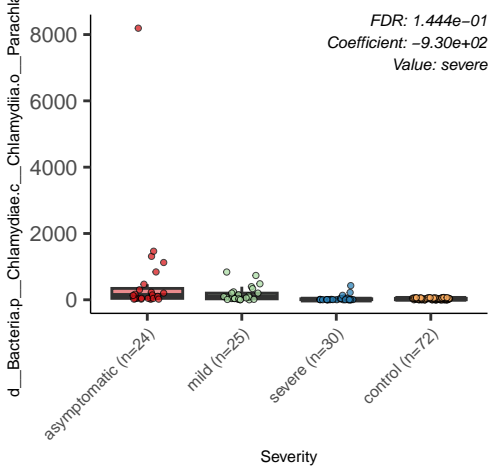



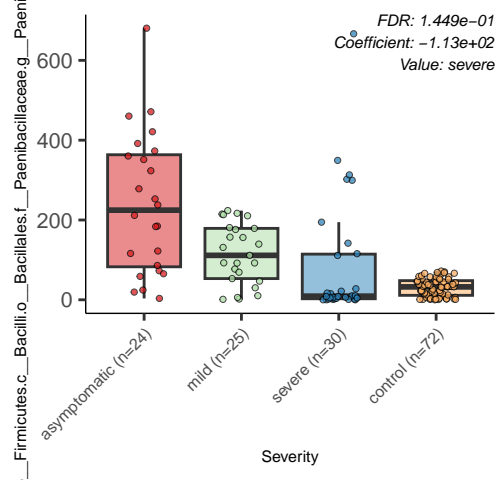

a.p.\_Proteobacteria.c.\_Gammaproteobacteria.o.\_Pasteurellales.f.

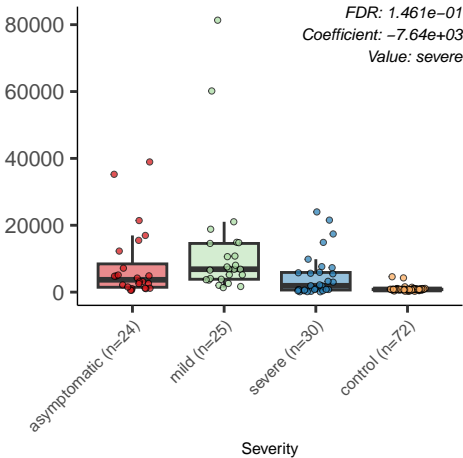

Bacteria.p\_\_Planctomycetes.c\_\_Planctomycetia.o\_\_Pirellulales.f\_\_F

FDR: 1.476e-01  
Coefficient: -2.26e+02  
Value: mild

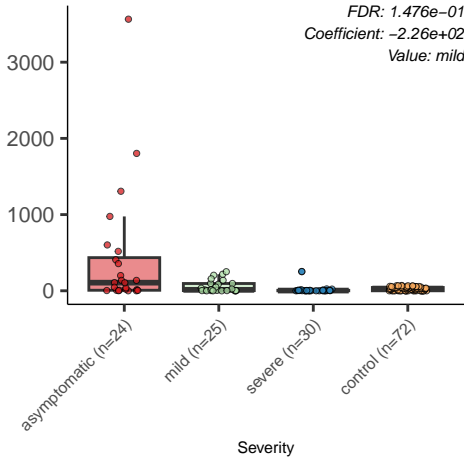

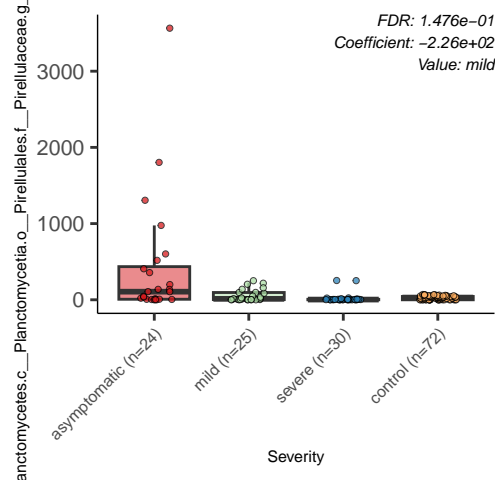

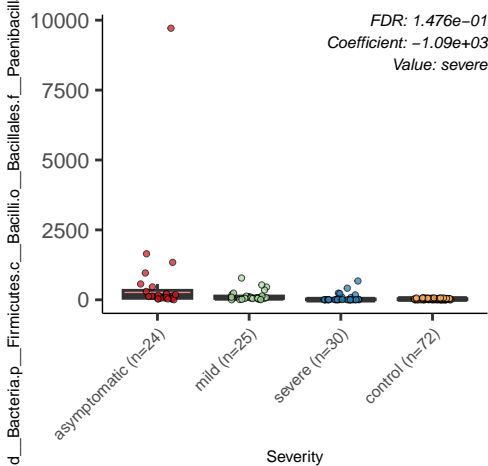

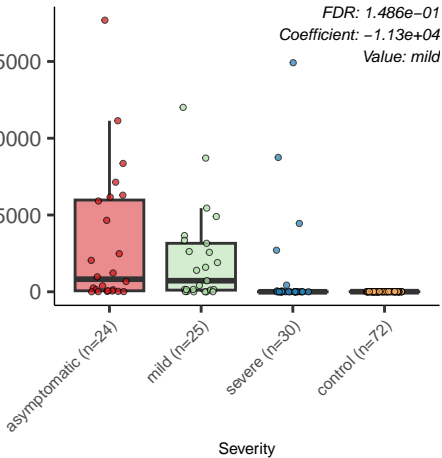

cteroidetes.c\_\_Bacteroidia.o\_\_Bacteroidales.f\_\_Barnesiellaceae.g

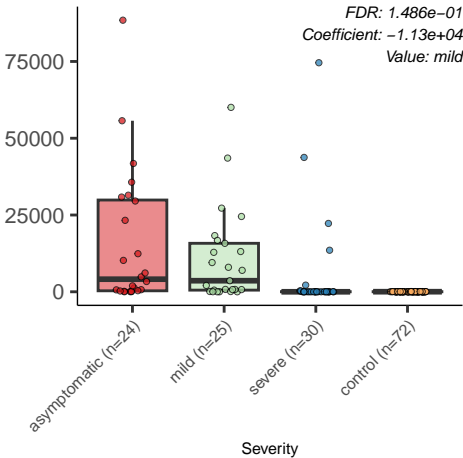

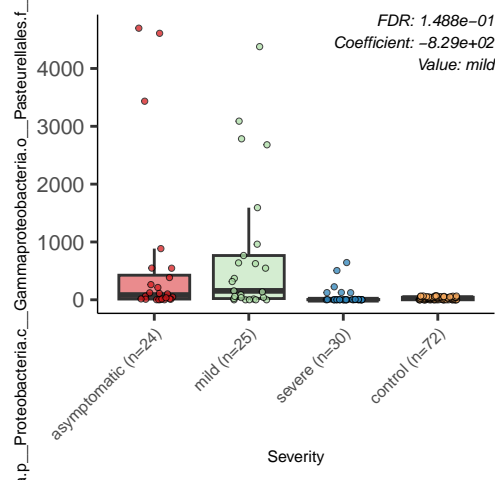



acteria.c\_\_Gammaproteobacteria.o\_\_Pasteurellales.f\_\_Pasteurella

FDR: 1.488e-01  
Coefficient: -8.29e+02  
Value: mild

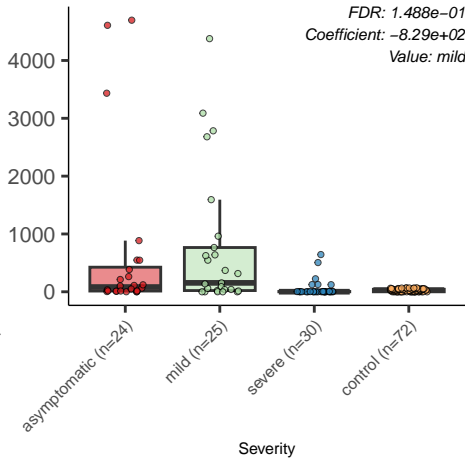

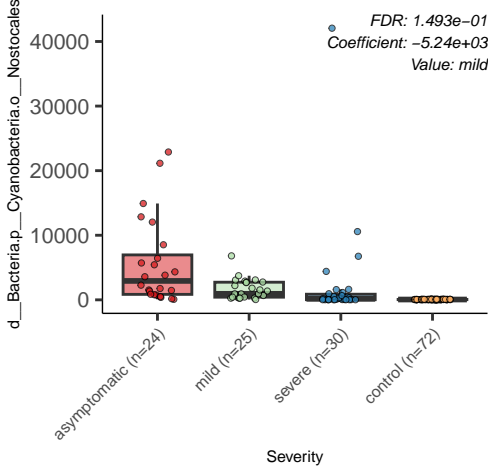

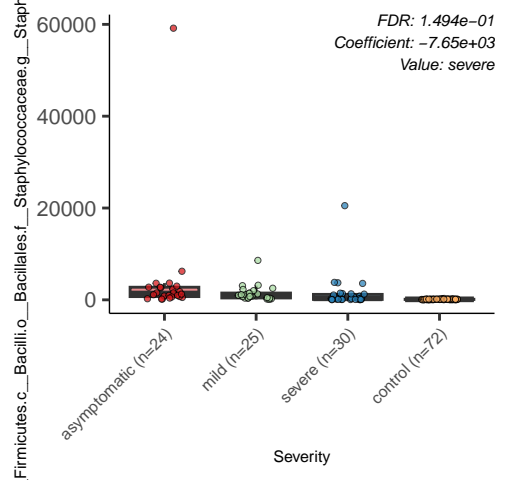

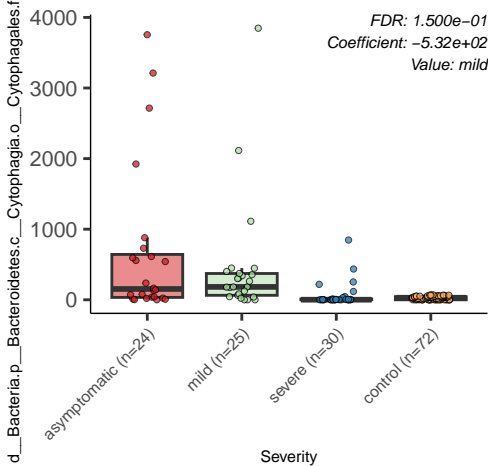

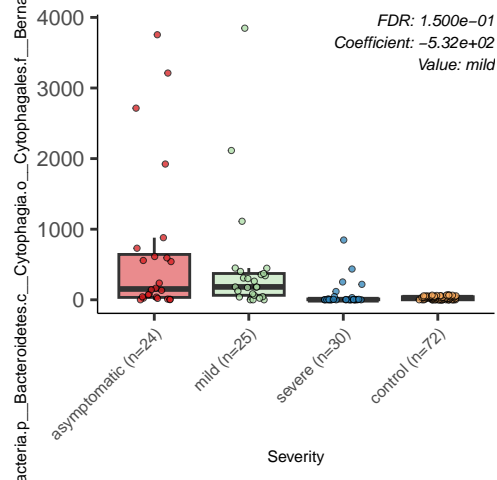

Bacteroidetes.c\_\_Cytophagia.o\_\_Cytophagales.f\_\_Bernardetiaceae.

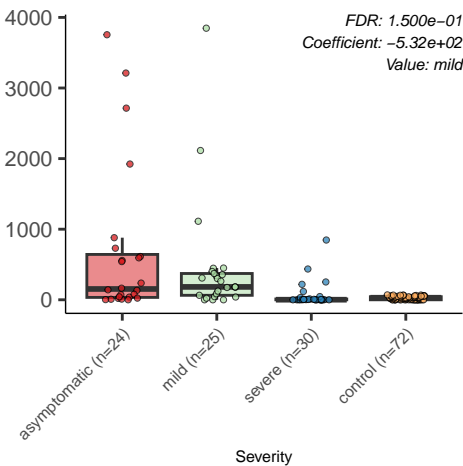

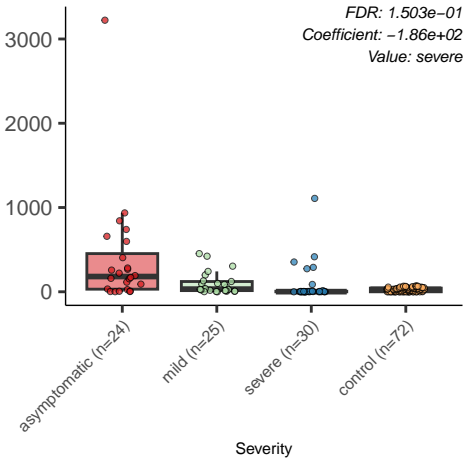

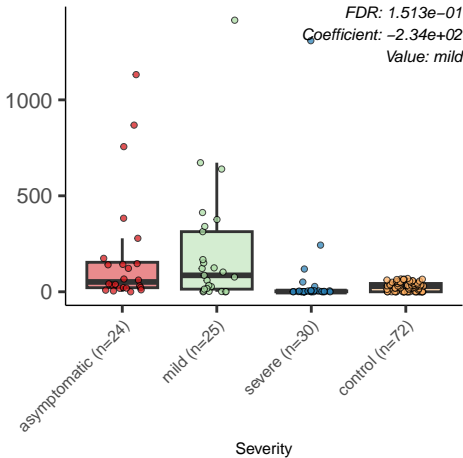



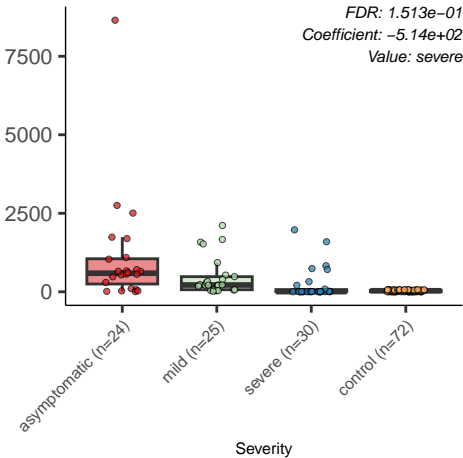

Proteobacteria.c\_\_Betaproteobacteria.o\_\_Neisseriales.f\_\_Neisseria

FDR:  $1.515e-01$   
Coefficient:  $-3.21e+02$   
Value: severe

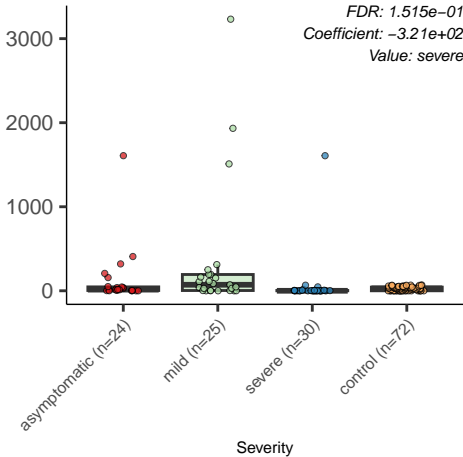

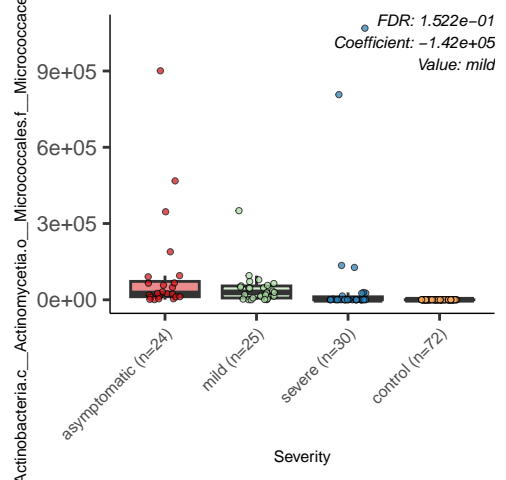

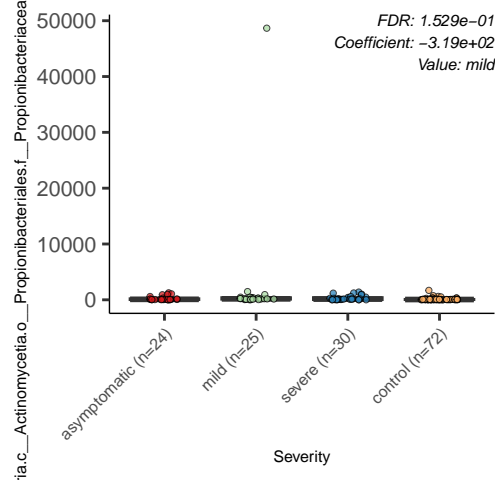

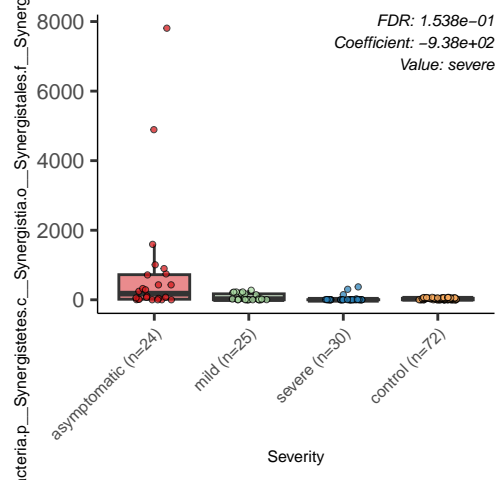

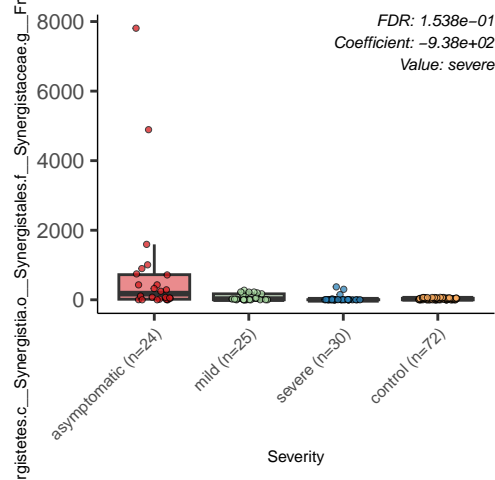

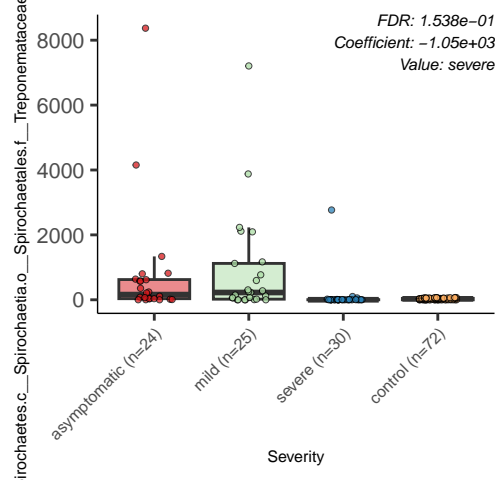

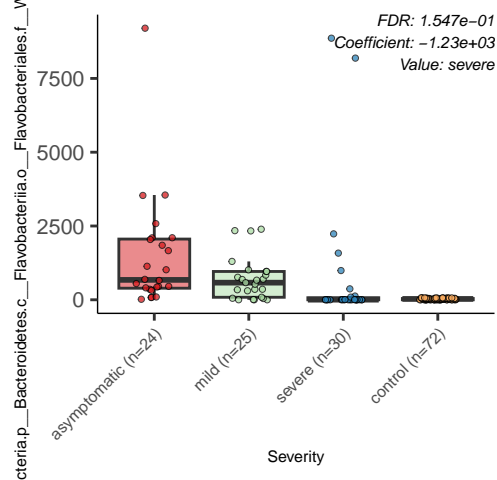



Bacteria.p\_Firmicutes.c\_Tissierellia.o\_Tissierellales.f\_Peptoni

*FDR: 1.548e-01*  
*Coefficient: -7.45e+02*  
*Value: mild*

6000  
4000  
2000  
0

asymptomatic (n=24)

mild (n=25)

severe (n=30)

control (n=72)

Severity

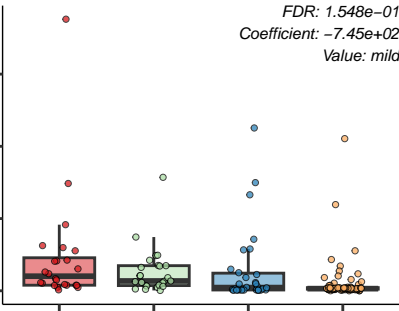

d\_Bacteria.p\_Bacteroidetes.c\_Bacteroidia.o\_Bacteroidales.f.

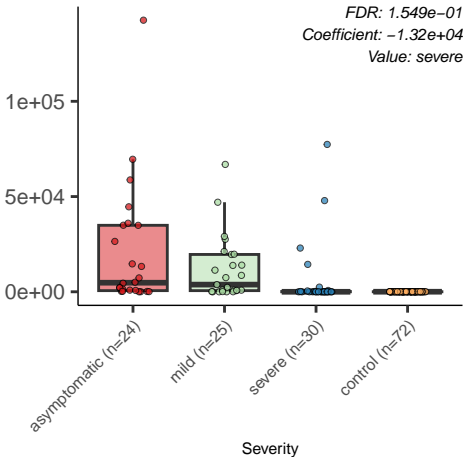

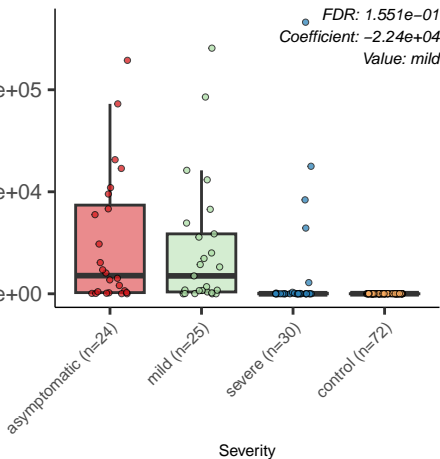

d\_Bacteria.p\_Actinobacteria.c\_Actinomycetia.o\_Micrococcales

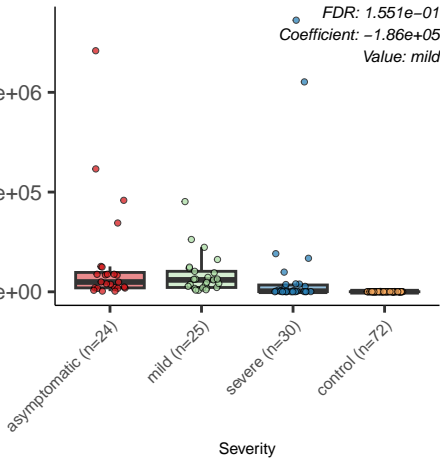

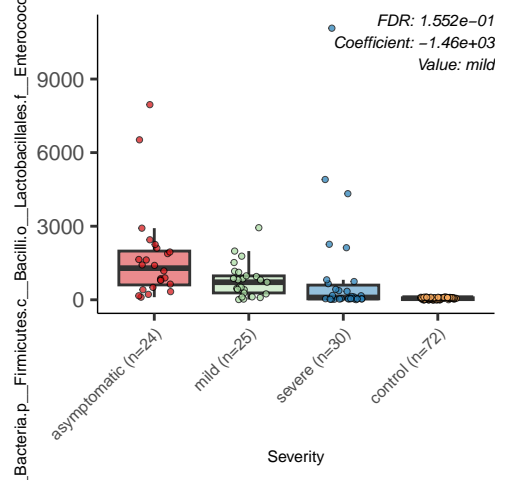

ria.p\_\_Proteobacteria.c\_\_Gammaproteobacteria.o\_\_Enterobactera

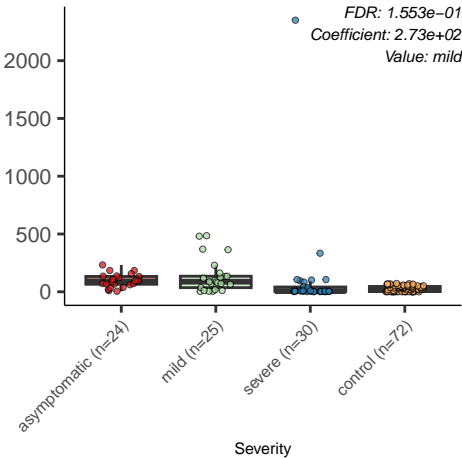

eria.p\_Actinobacteria.c\_Coriobacteriia.o\_Eggerthellales.f\_Egg

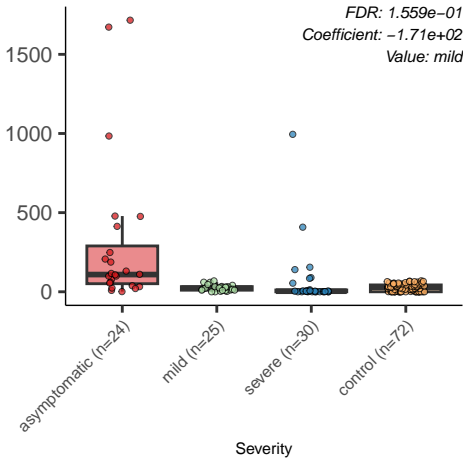

bacteria.c\_\_Coriobacteriia.o\_\_Eggerthellales.f\_\_Eggerthellaceae.g

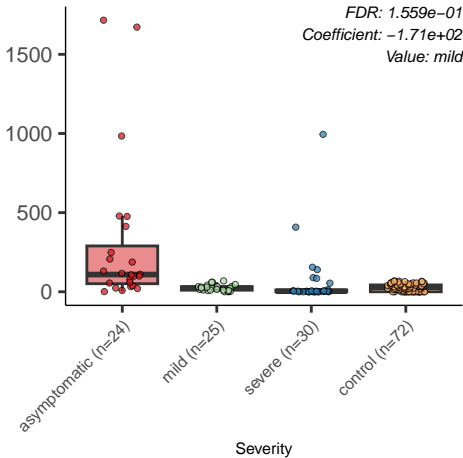



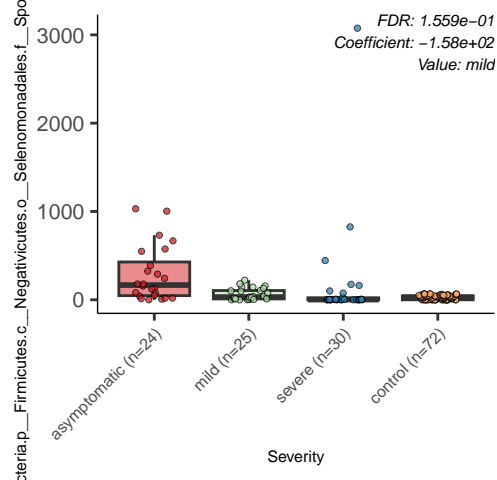

micutes.c\_\_Negativicutes.o\_\_Selenomonadales.f\_\_Sporomusaceae

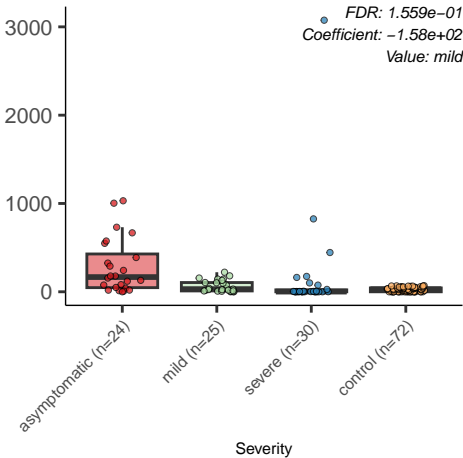

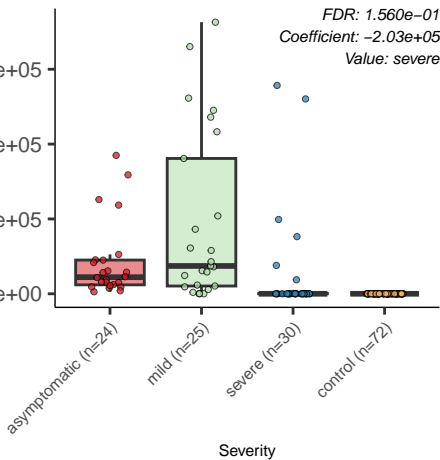

ia.p\_\_Bacteroidetes.c\_\_Bacteroidia.o\_\_Bacteroidales.f\_\_Porphyromon

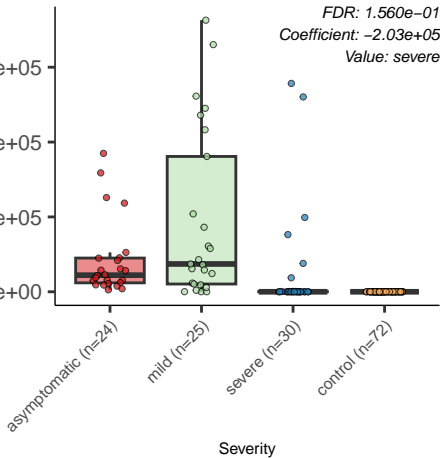

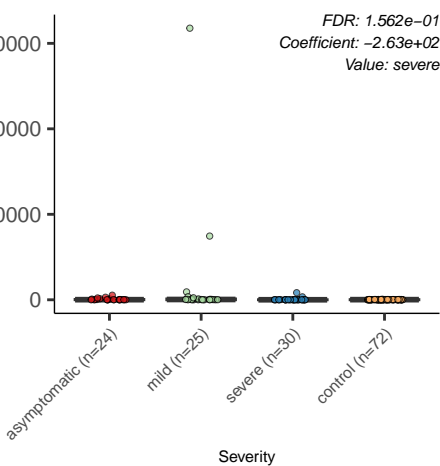

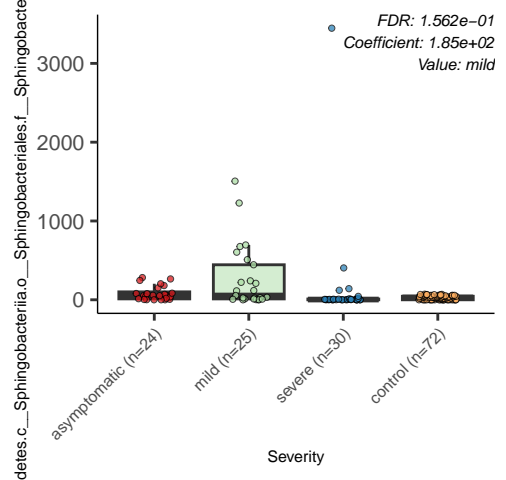

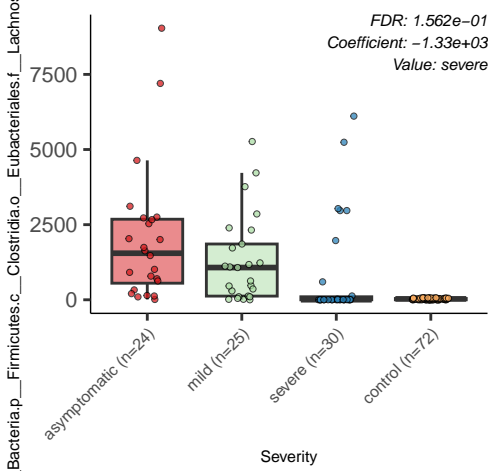

Firmicutes.c\_\_Clostridia.o\_\_Eubacteriales.f\_\_Lachnospiraceae.g

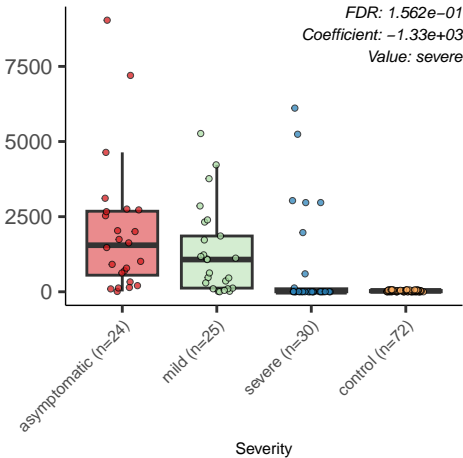



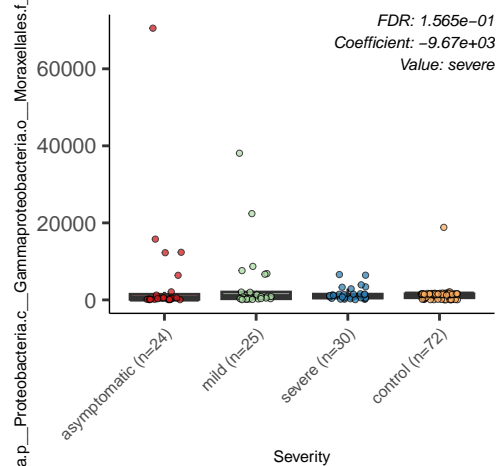

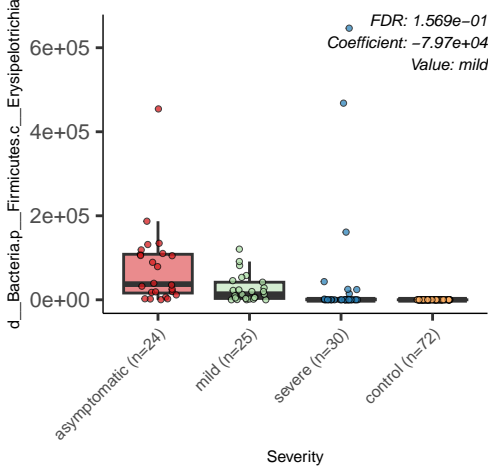

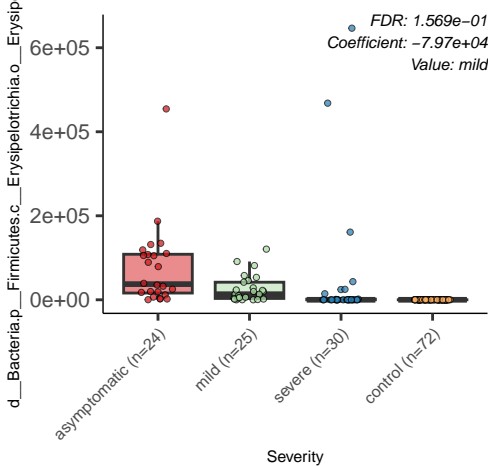

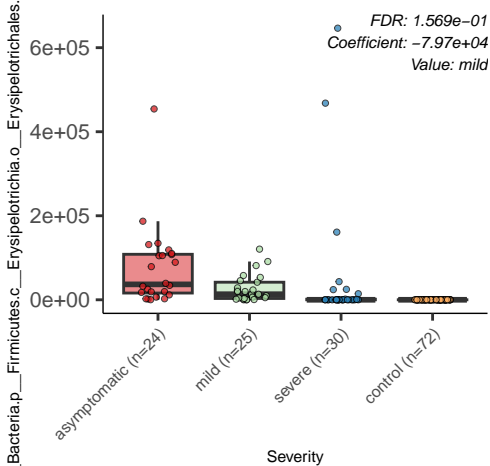

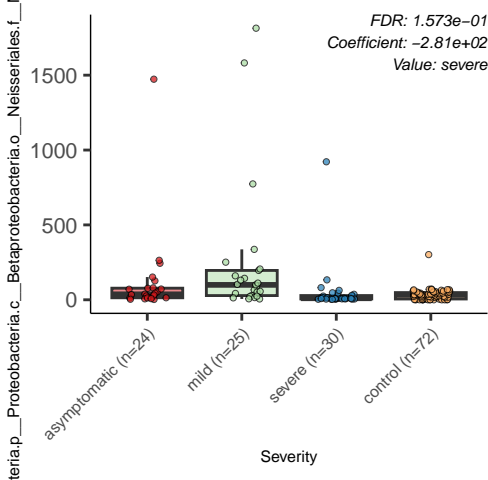

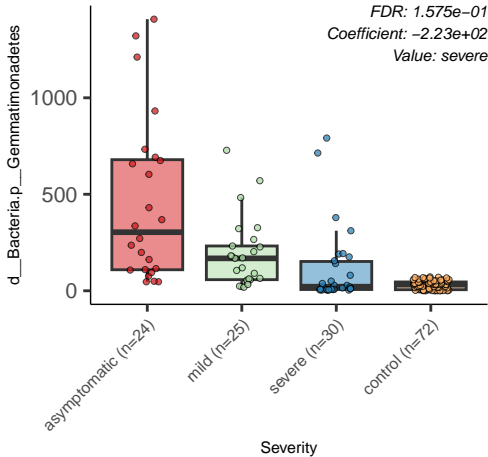

d\_Bacteria.p\_Gemmatimonadetes.c\_Gemmatimonadetes

1000

500

0

asymptomatic (n=24)

mild (n=25)

severe (n=30)

control (n=72)

Severity

FDR: 1.575e-01

Coefficient: -2.23e+02

Value: severe

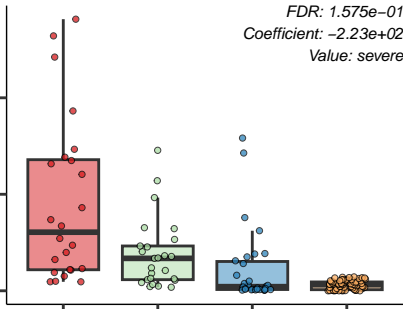

d\_Bacteria.p\_Gemmatimonadetes.c\_Gemmatimonadetes.o\_o

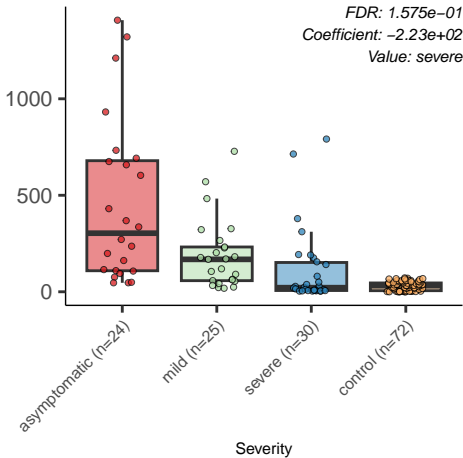



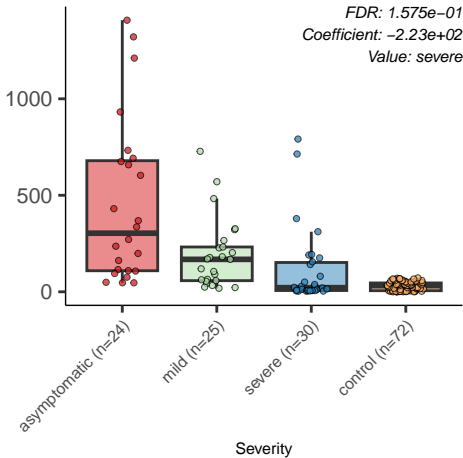

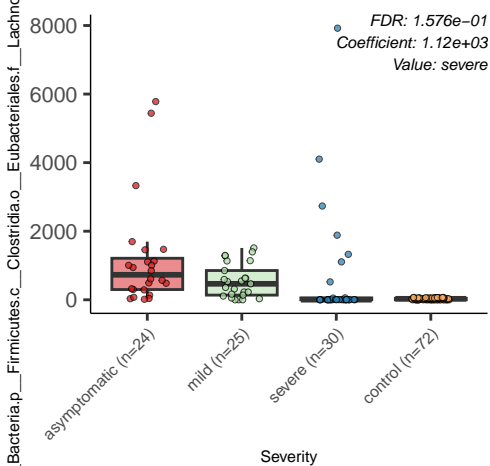

p\_Firmicutes.c\_\_Clostridia.o\_\_Eubacteriales.f\_\_Lachnospiraceae

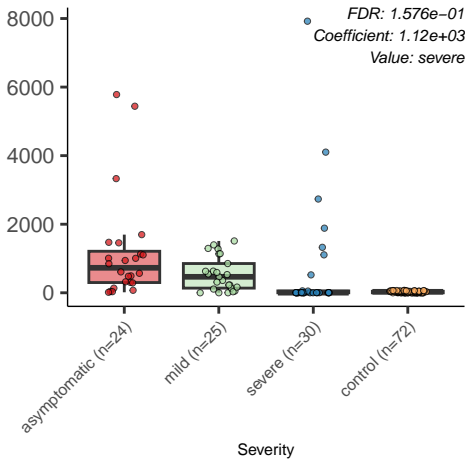

Firmicutes.c\_\_Bacilli.o\_\_Lactobacillales.f\_\_Streptococcaceae.g\_\_Str

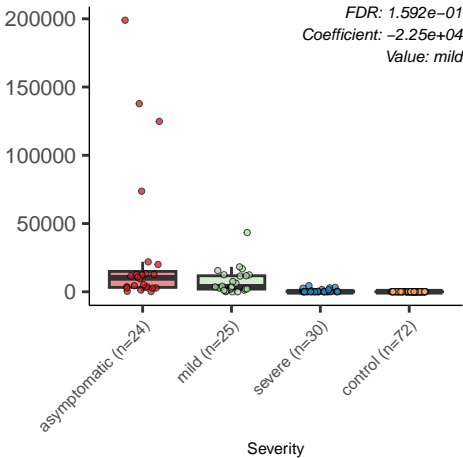

a.c.\_Gammaproteobacteria.o.\_Pseudomonadales.f.\_Pseudomonas

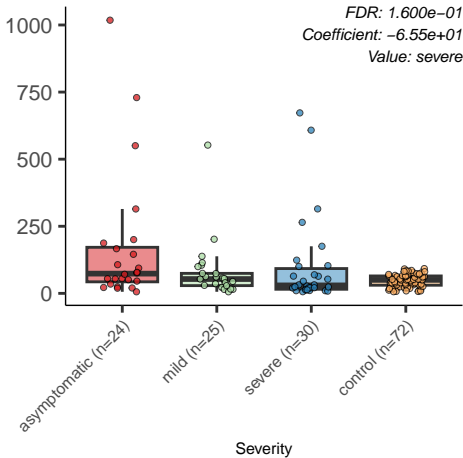

d\_Bacteria.p\_\_Chloroflexi.c\_\_Candidatus.Thermoflexus

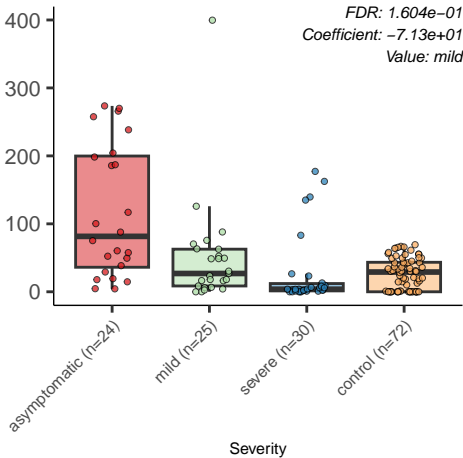

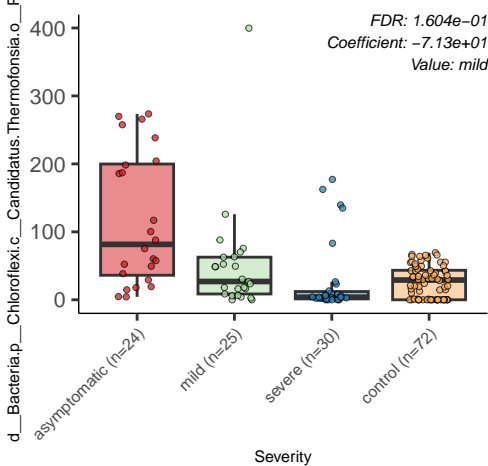

acteria.p\_\_Chloroflexi.c\_\_Candidatus.Thermofonsia.o\_\_Phototrophic

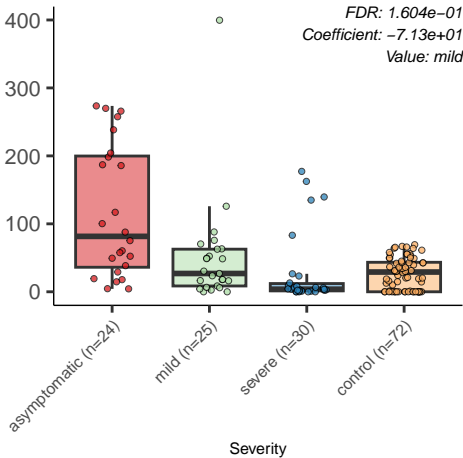



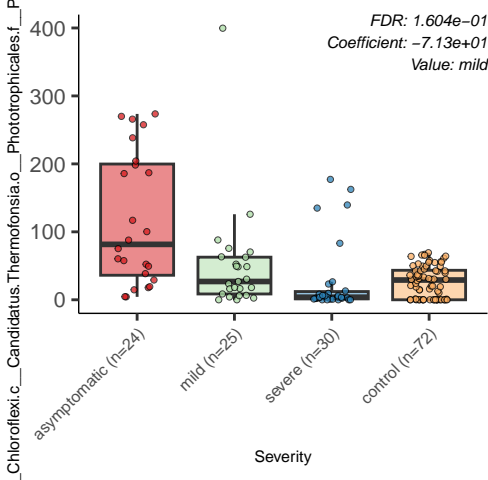

andidatus.Thermofonsia.o\_\_Phototrophicales.f\_\_Phototrophicaceae.

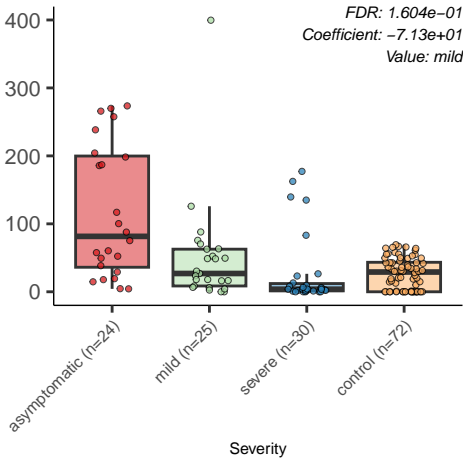

d\_Bacteria.p\_Firmicutes.c\_Bacilli.o\_Bacillales.f\_Planococcaceae

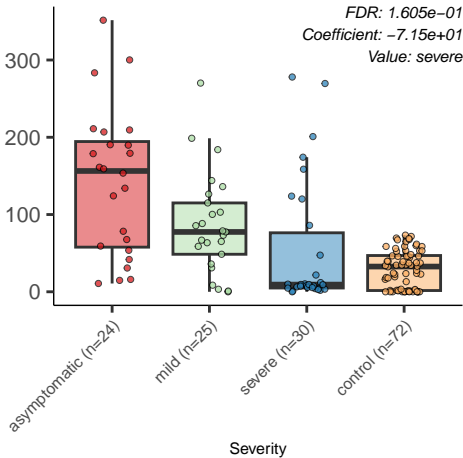

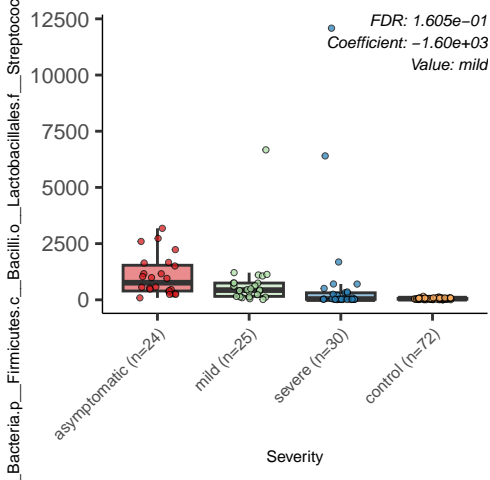

acteria.c\_\_Betaproteobacteria.o\_\_Burkholderiales.f\_\_Burkholderiaceae

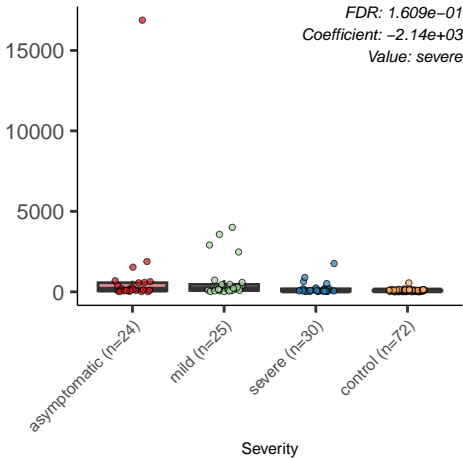

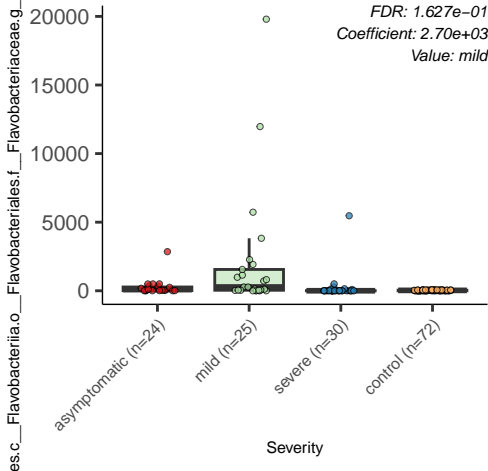

d\_Bacteria.p\_\_Proteobacteria.c\_\_Oligoflexia

FDR: 1.645e-01  
Coefficient: -8.90e+02  
Value: mild

10000

5000

0

asymptomatic (n=24)

mild (n=25)

severe (n=30)

control (n=72)

Severity

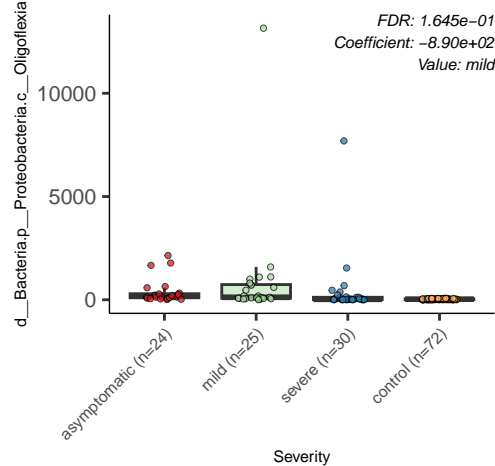

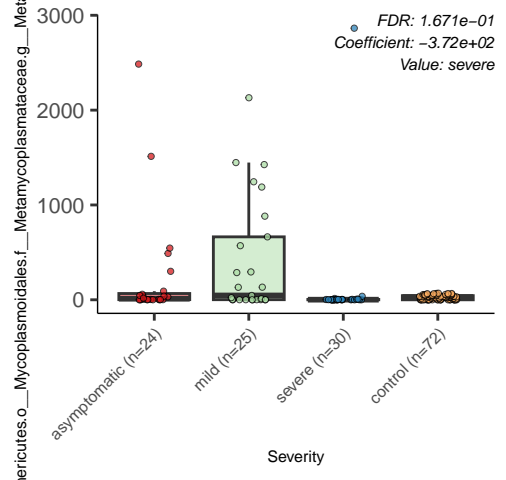



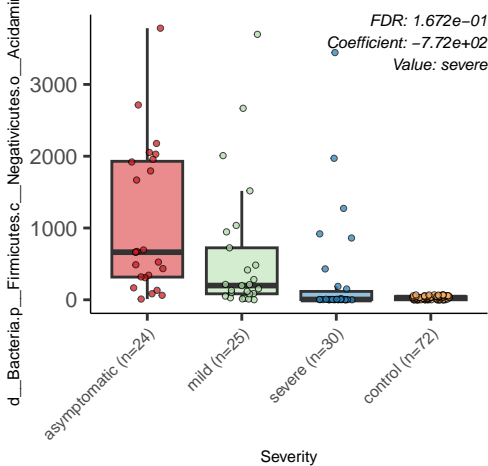

Bacteria.p\_Firmicutes.c\_Negativicutes.o\_Acidaminococcales.f

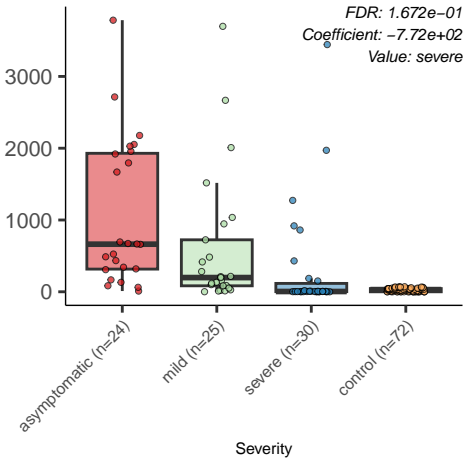

\_\_Bacteria.p\_\_Actinobacteria.c\_\_Actinomycetia.o\_\_Micrococcales.f.

*FDR: 1.679e-01*  
*Coefficient: -1.87e+02*  
*Value: severe*

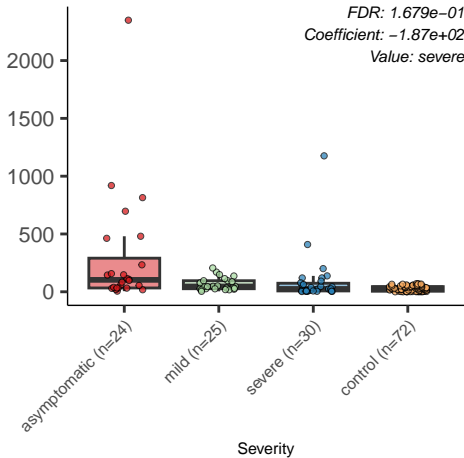

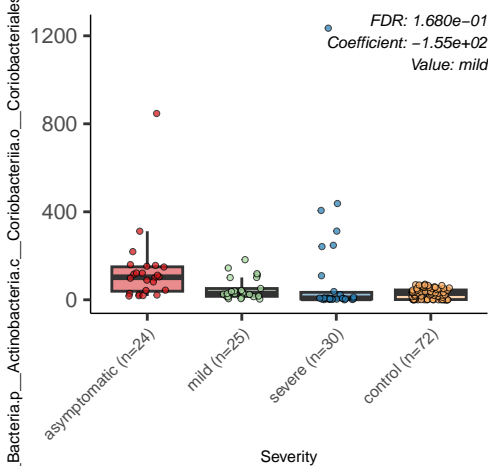

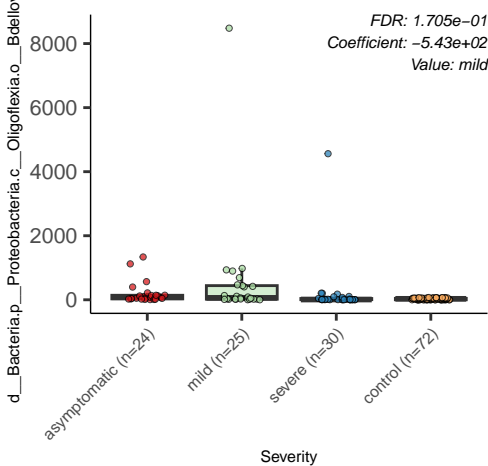

d\_Bacteria.p\_Proteobacteria.c\_Oligoflexia.o\_Bdellovibrionales.

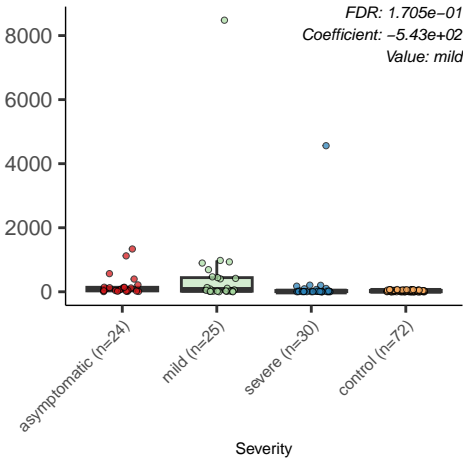

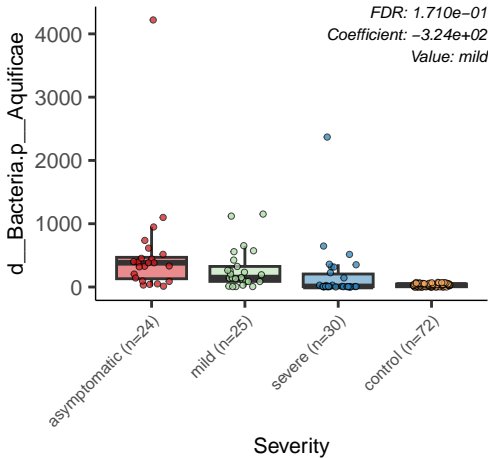

d\_Bacteria.p\_Aquificae.c\_Aquificae

FDR: 1.710e-01  
Coefficient: -3.24e+02  
Value: mild

asymptomatic (n=24)

mild (n=25)

severe (n=30)

control (n=72)

Severity

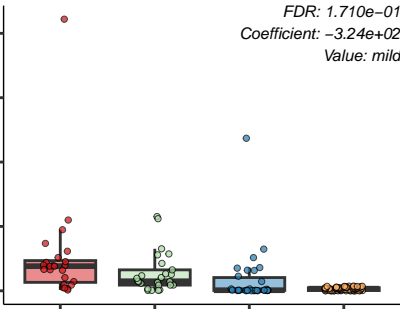



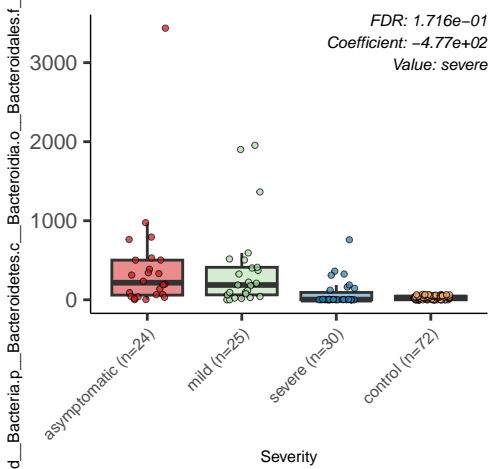

acteria.p\_Bacteroidetes.c\_Bacteroidia.o\_Bacteroidales.f\_Paludib

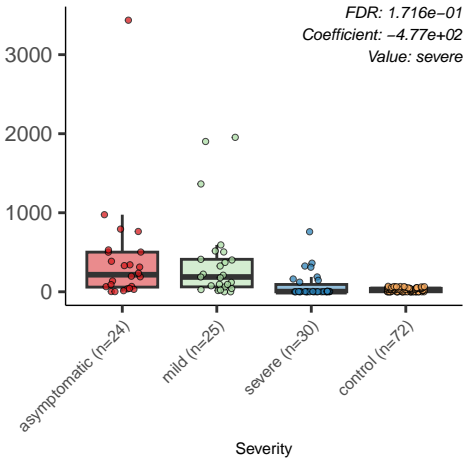

pidetes.c\_Bacteroidia.o\_Bacteroidales.f\_Paludibacteraceae.g

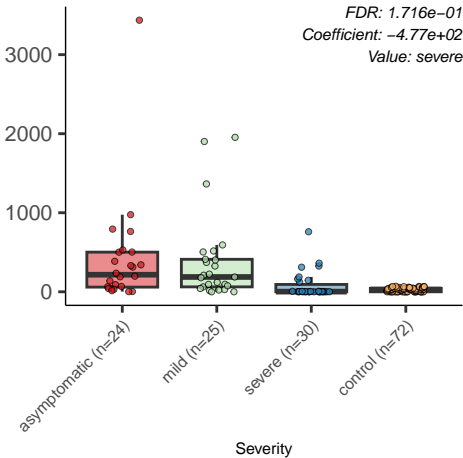

Firmicutes.c\_\_Bacilli.o\_\_Lactobacillales.f\_\_Streptococcaceae.g\_\_S

FDR: 1.719e-01  
Coefficient: -1.41e+03  
Value: severe

7500

5000

2500

0

asymptomatic (n=24)

mild (n=25)

severe (n=30)

control (n=72)

Severity

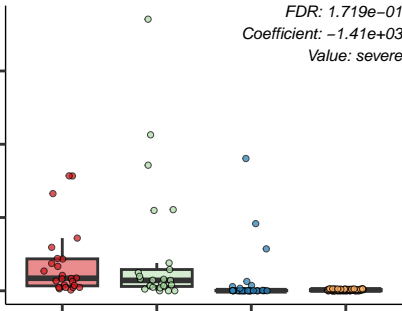

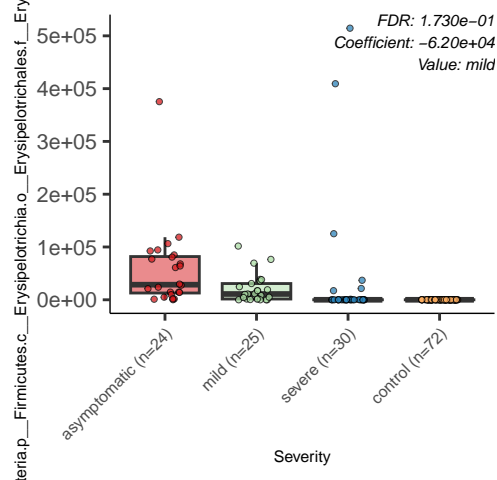

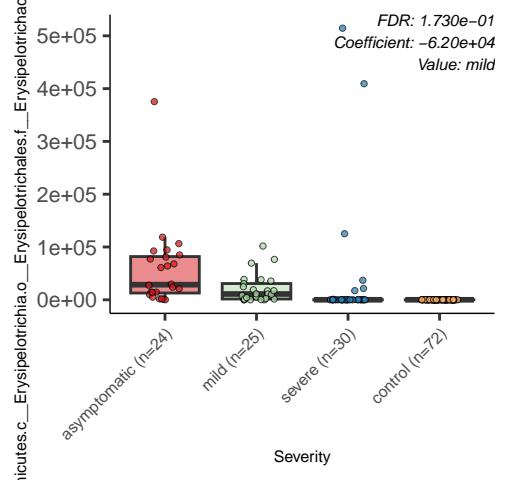

icutes.c\_\_Bacilli.o\_\_Lactobacillales.f\_\_Streptococcaceae.g\_\_Strepto

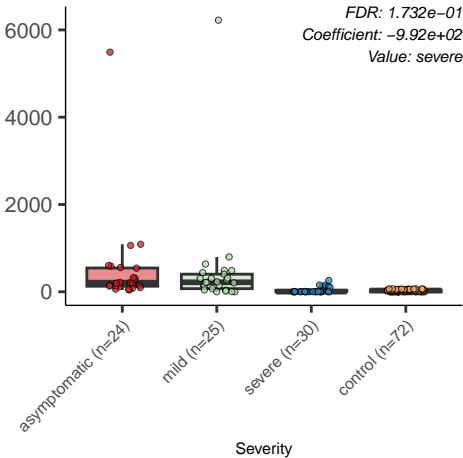

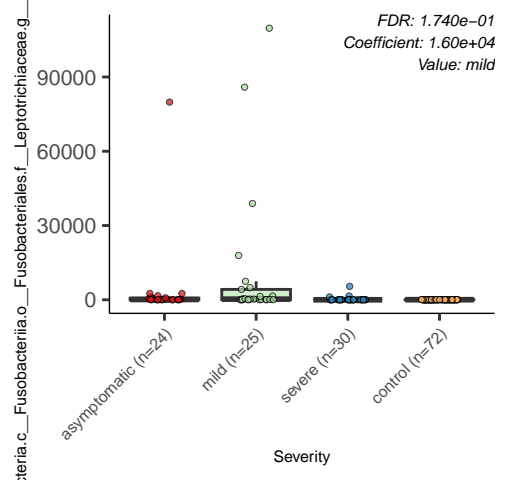



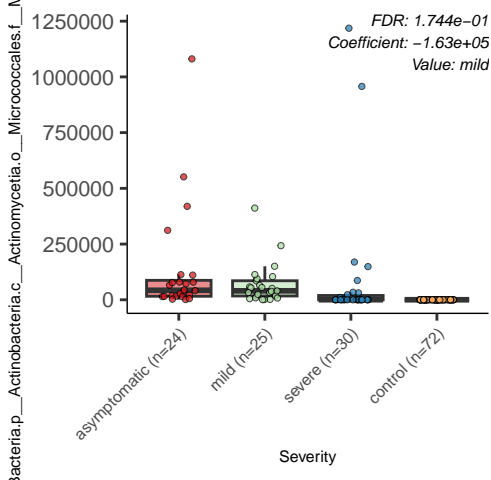

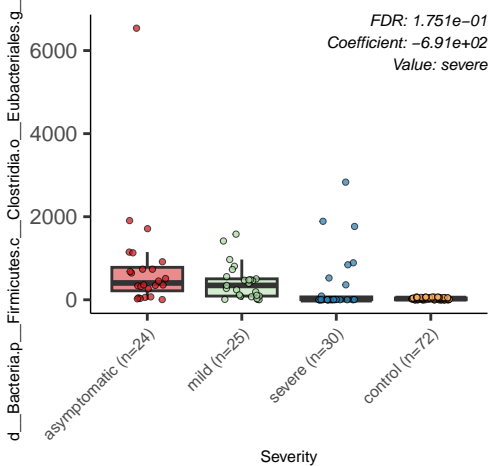

ria.p\_\_Firmicutes.c\_\_Clostridia.o\_\_Eubacteriales.g\_\_Massilistercora

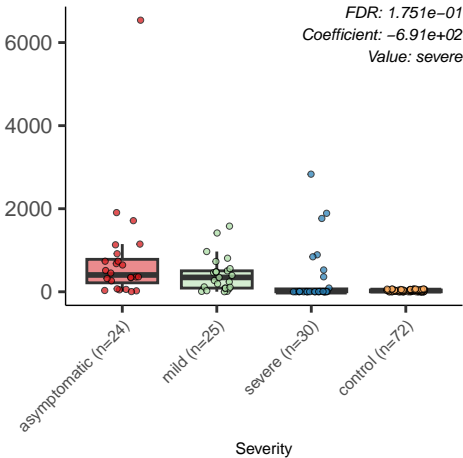

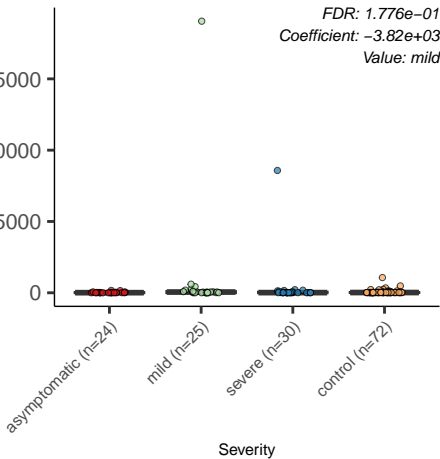

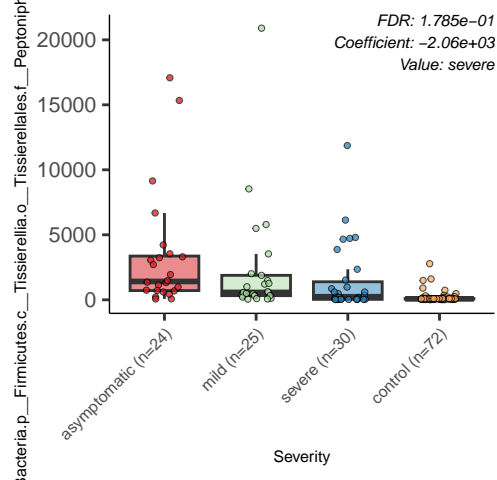

bacteria.p\_\_Proteobacteria.c\_\_Gammaproteobacteria.o\_\_Enterobac

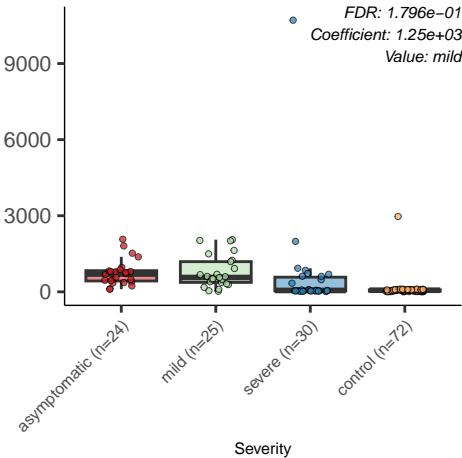

d\_Bacteria.p\_Actinobacteria.c\_Actinomycetia.o\_Candidatus

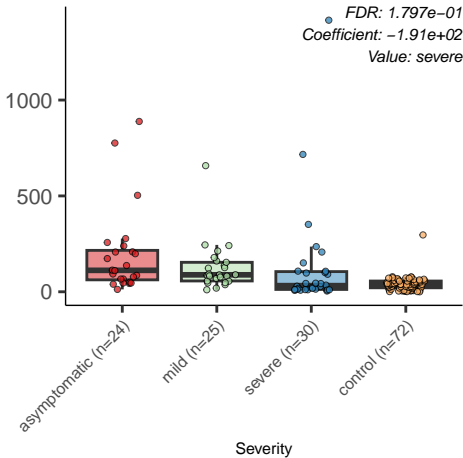

Actinobacteria.c\_\_Actinomycetia.o\_\_Candidatus.Nanopelagale

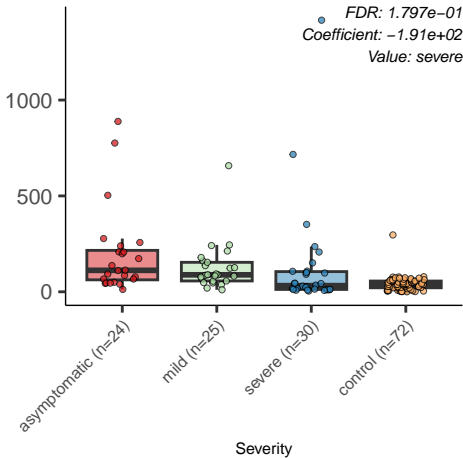



d\_Bacteria.p\_Bacteroidetes.c\_Bacteroidia.o\_Bacteroidales.

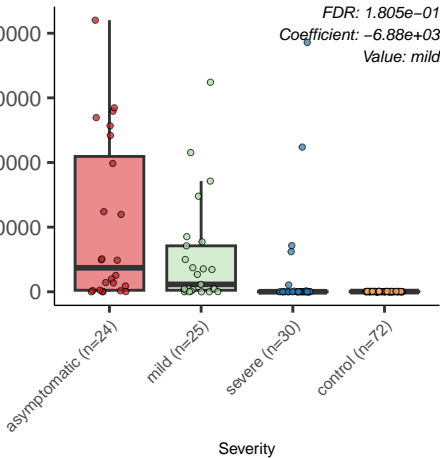

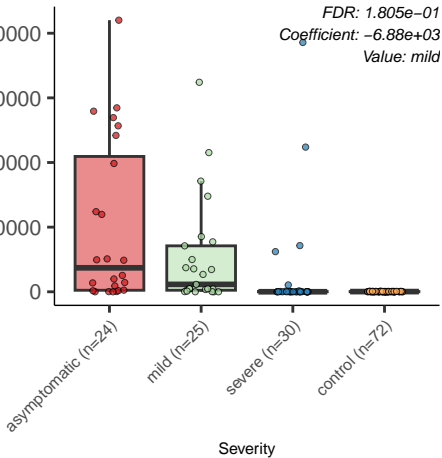

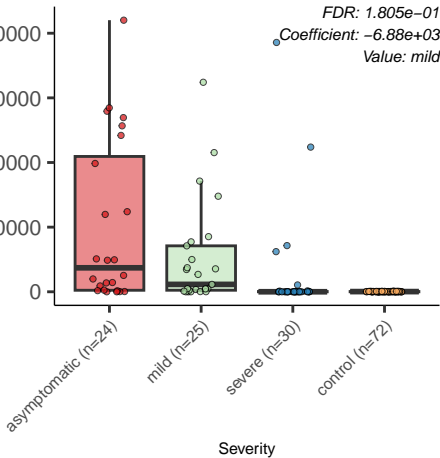

eria.c\_Actinomyces.f\_Candidatus.Nanopelagales.f\_Candidatu

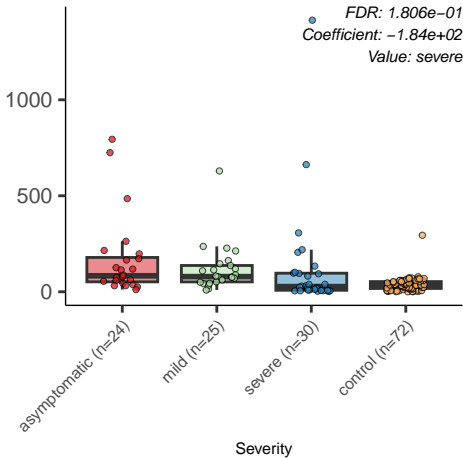

a.p\_\_Firmicutes.c\_\_Erysipelotrichia.o\_\_Erysipelotrichales.f\_\_Erysip

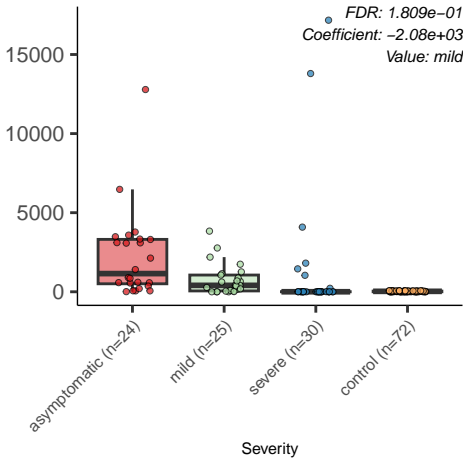

.c\_\_Erysipelotrichia.o\_\_Erysipelotrichales.f\_\_Erysipelotrichaceae.g

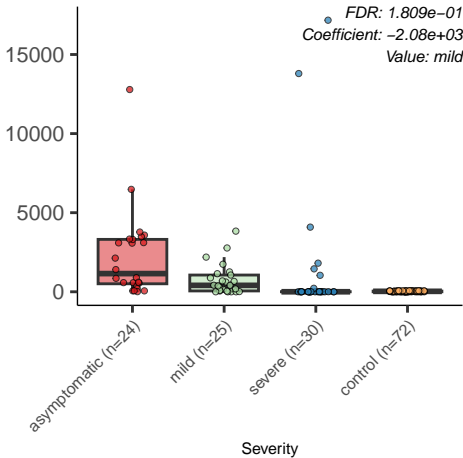

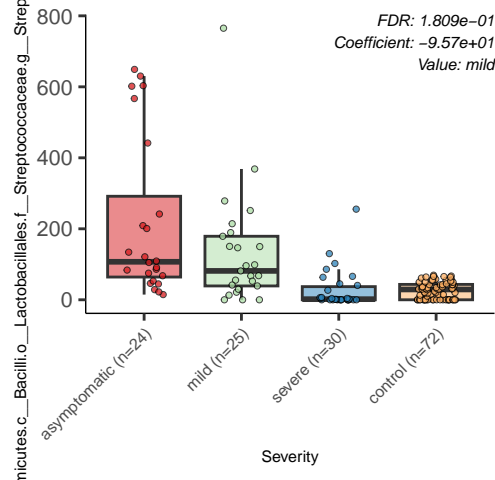

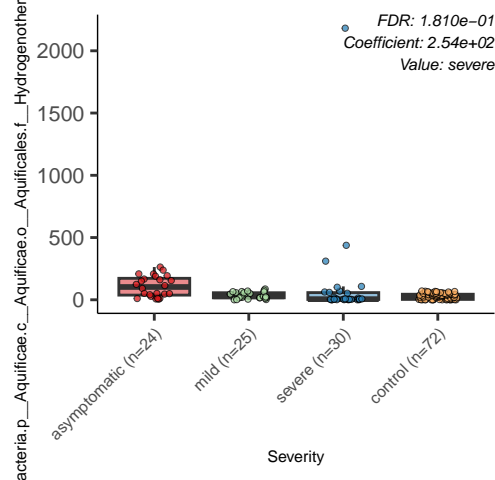



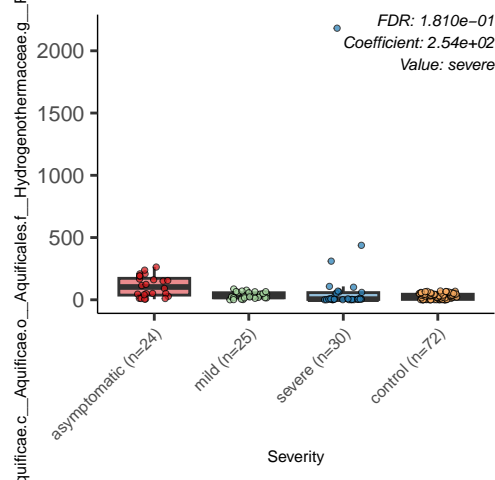

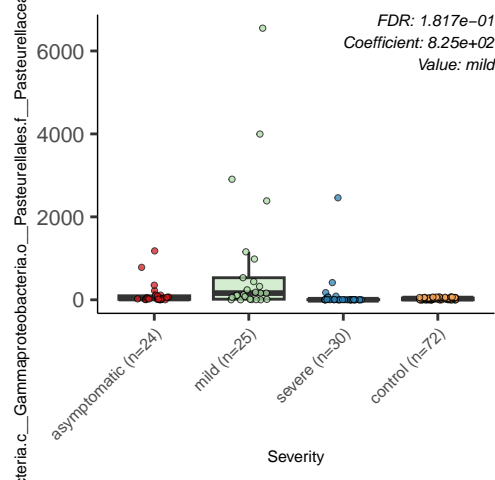

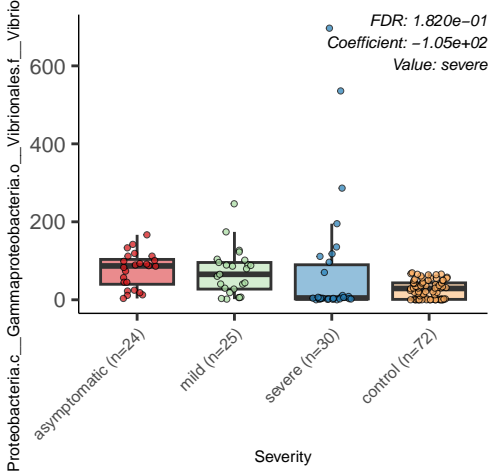

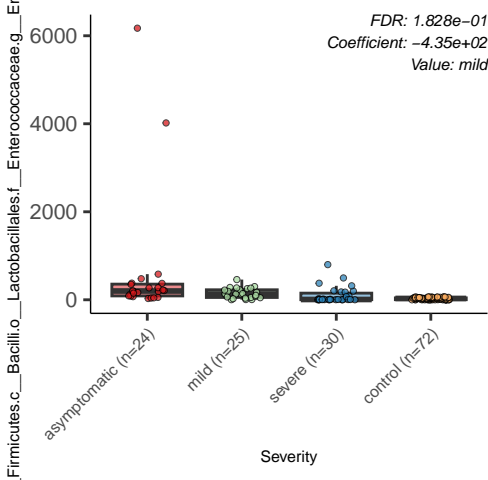

cteroidetes.c\_\_Bacteroidia.o\_\_Bacteroidales.f\_\_Prevotellaceae.g

*FDR: 1.833e-01*  
*Coefficient: -1.70e+05*  
*Value: mild*

1e+06

5e+05

0e+00

asymptomatic (n=24)

mild (n=25)

severe (n=30)

control (n=72)

Severity

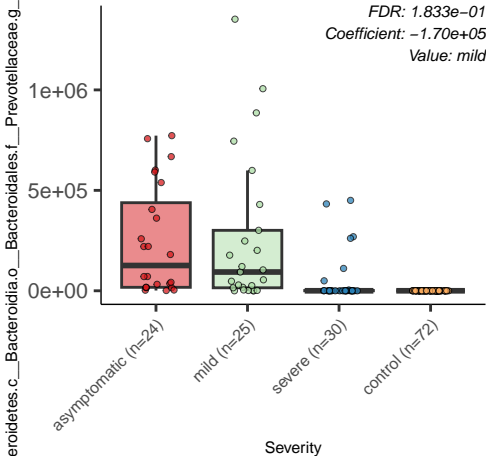

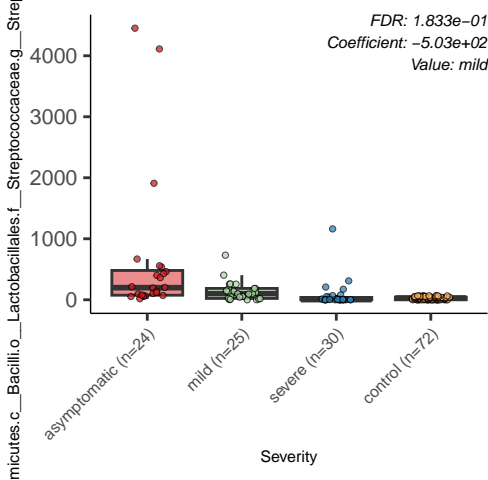

micutes.c\_Bacilli.o\_Lactobacillales.f\_Streptococcaceae.g\_Strep

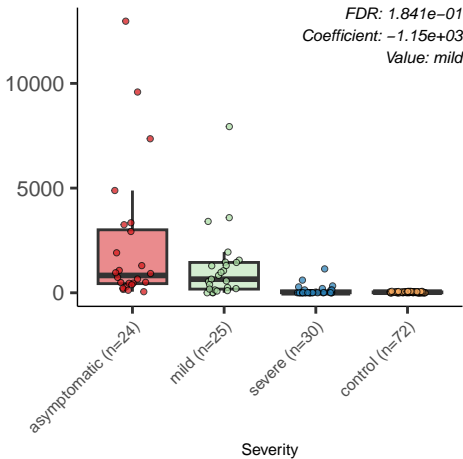

Bacteria.p\_Firmicutes.c\_Bacilli.o\_Bacillales.f\_Alicyclobacillae

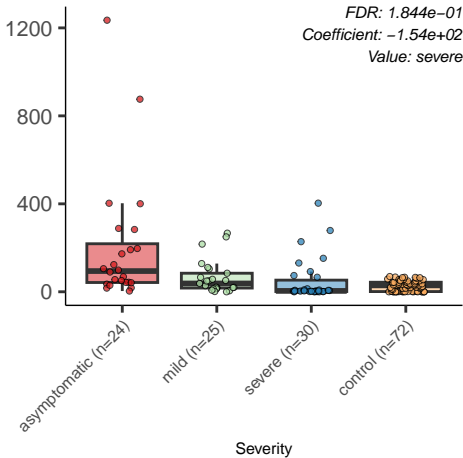



d\_Bacteria.p\_Bacteroidetes.c\_Bacteroidia.o\_Bacteroidales.f.

FDR:  $1.853e-01$   
Coefficient:  $-1.21e+04$   
Value: mild

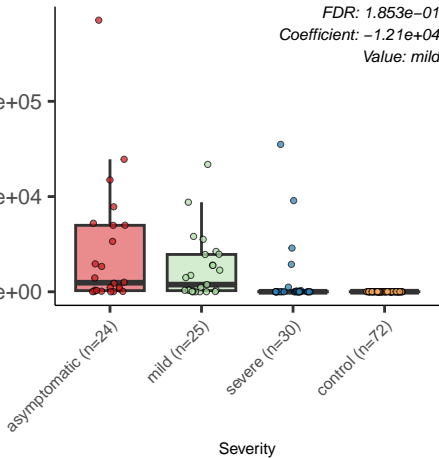

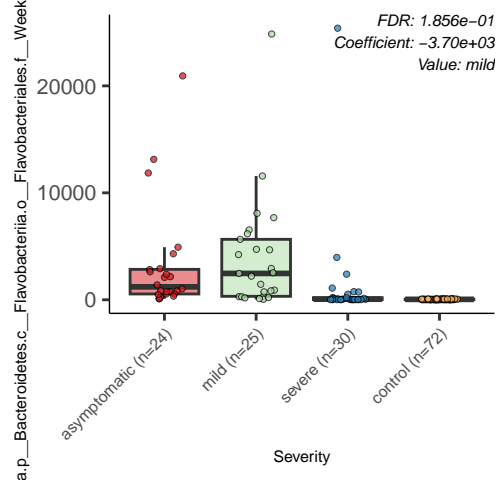

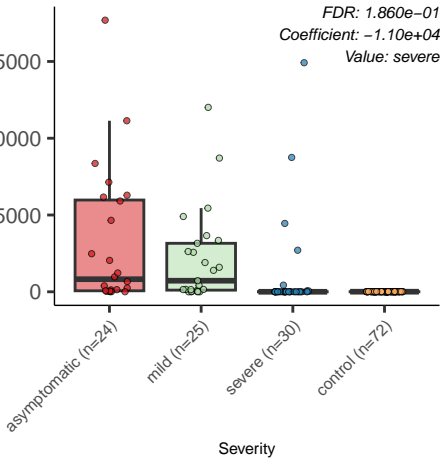

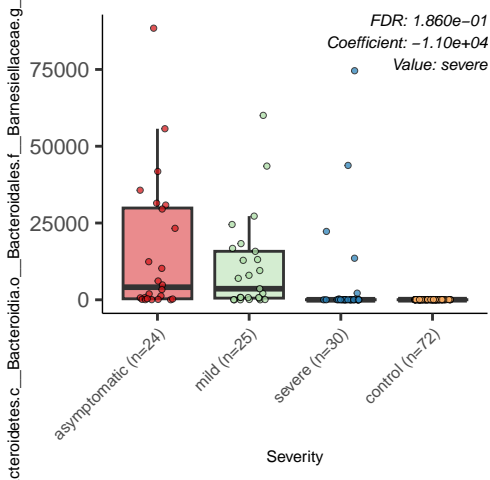

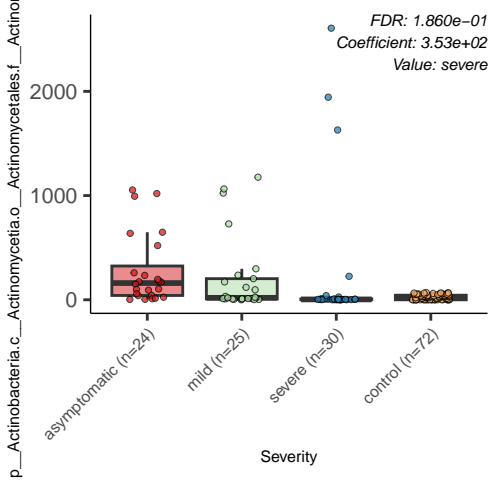

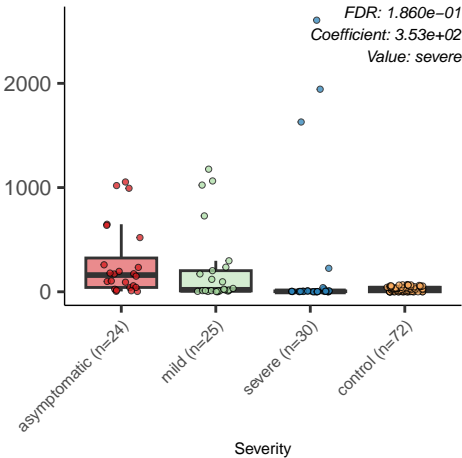

d\_Bacteria.p\_Aquificae.c\_Aquificae.o\_Aquificales.f\_Hydro

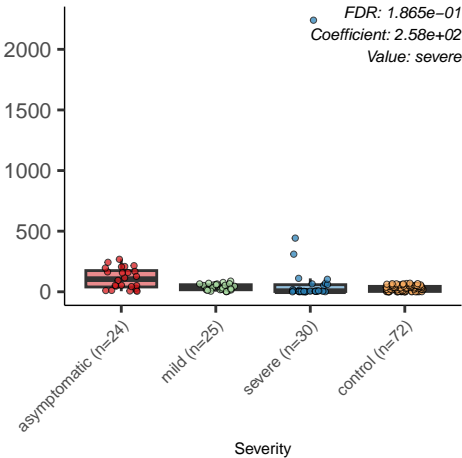

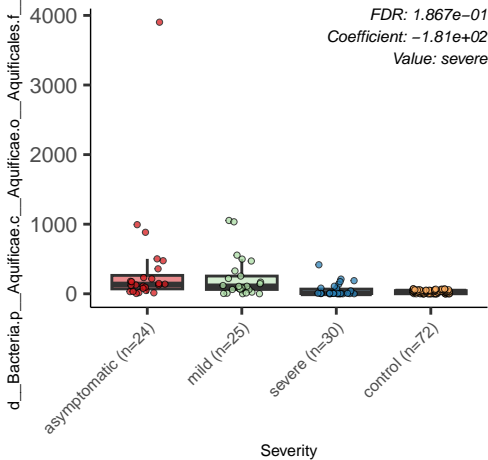



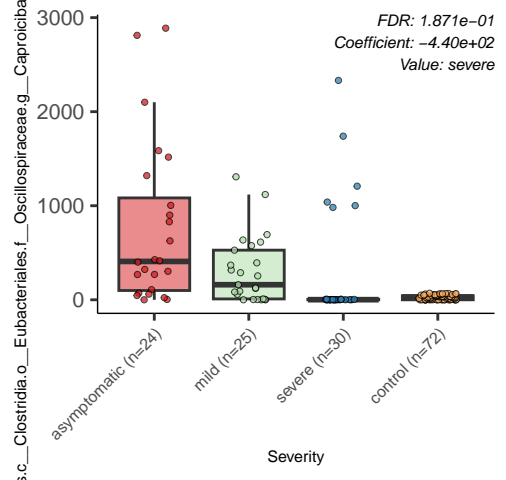

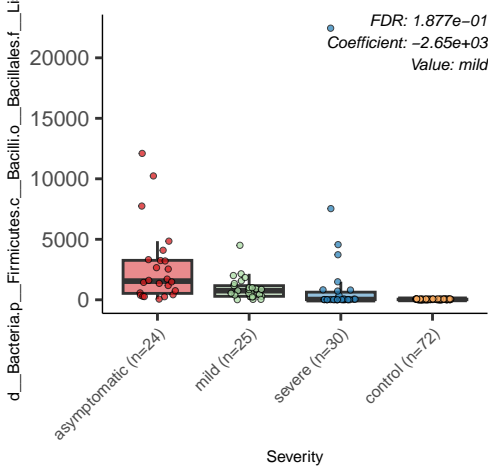

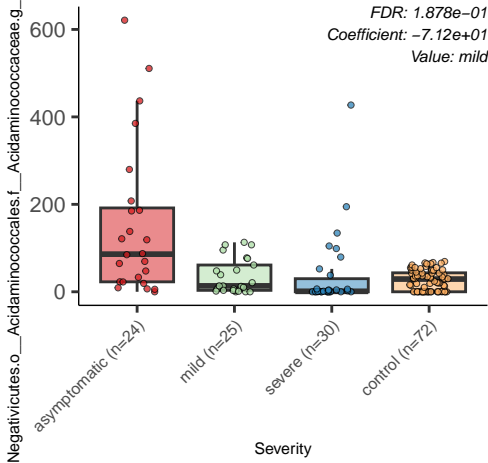

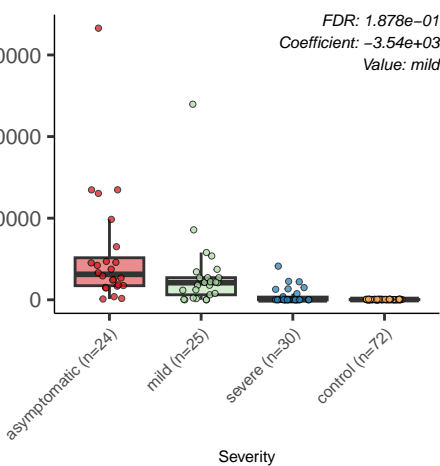

Bacteria.p\_Spirochaetes.c\_Spirochaetia.o\_Leptospirales.f\_Lept

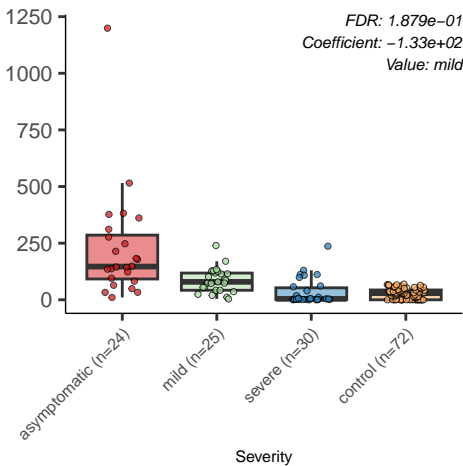

FDR: 1.888e-01  
Coefficient: 2.98e+02  
Value: mild

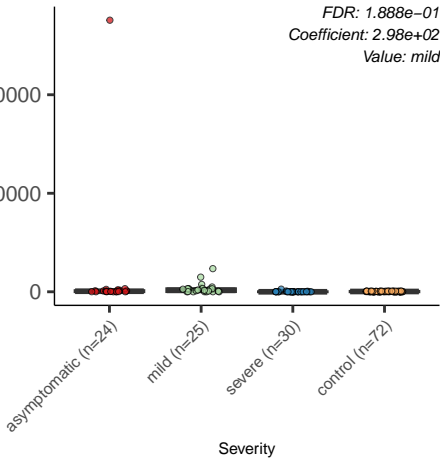

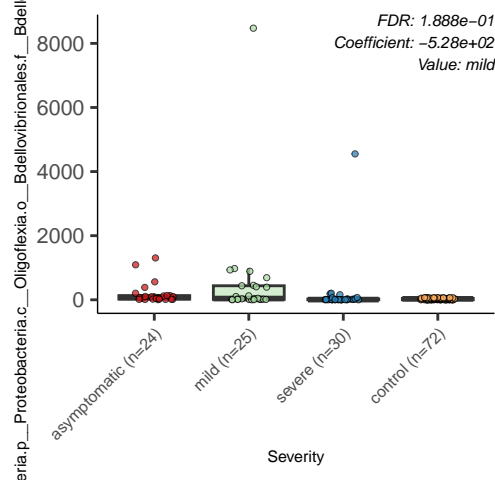

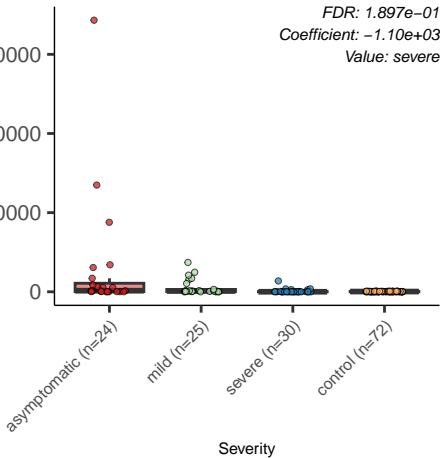



FDR:  $1.911\text{e-}01$   
Coefficient:  $-1.94\text{e+}03$   
Value: severe

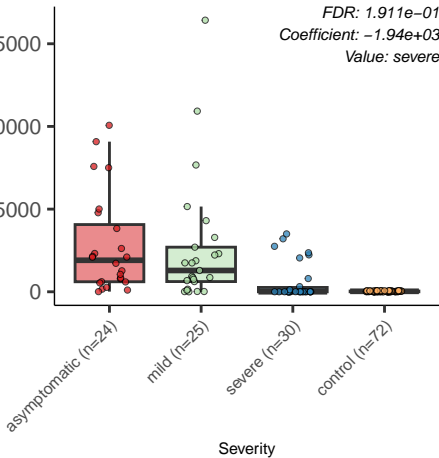

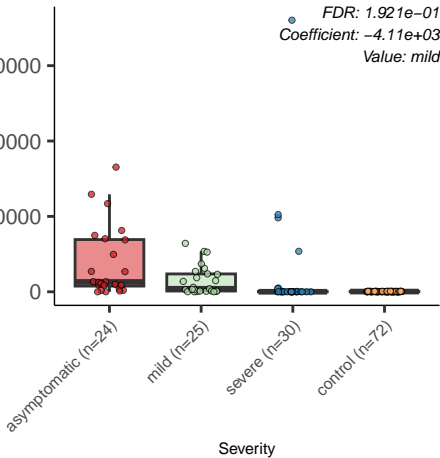

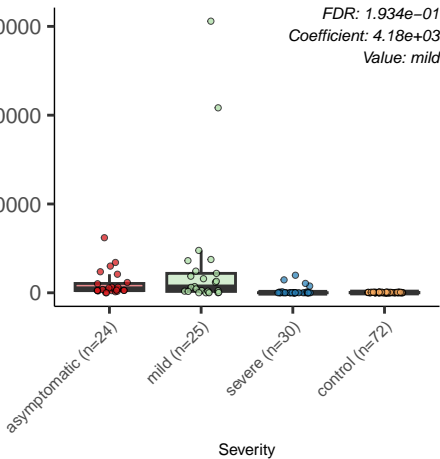

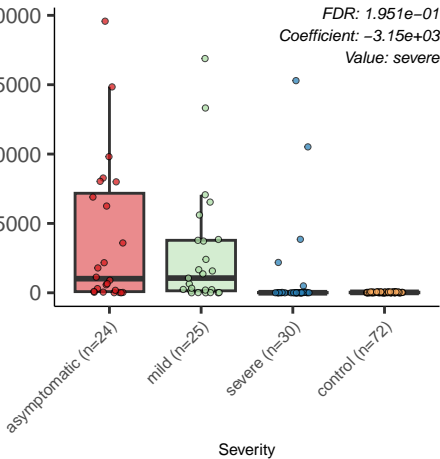

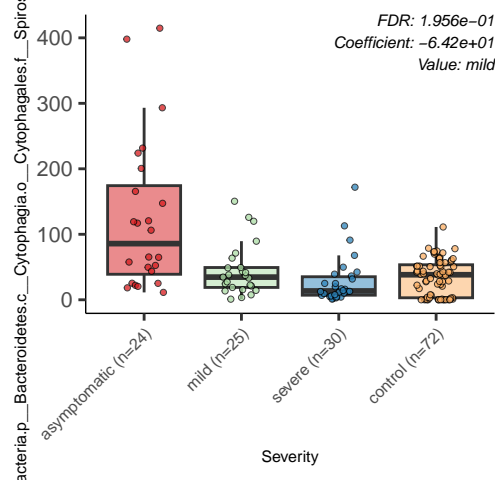

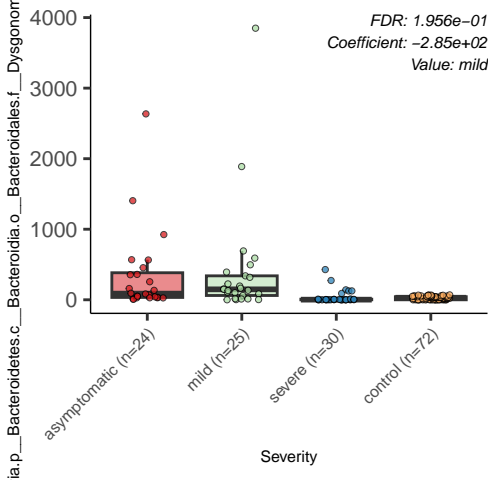

arimonadia.o\_\_Candidatus.Nanosynbacterales.f\_\_Candidatus.Nano

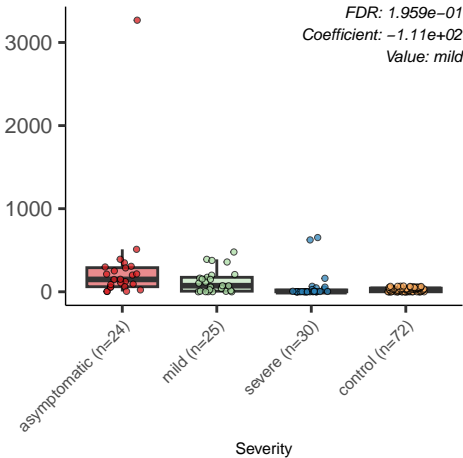

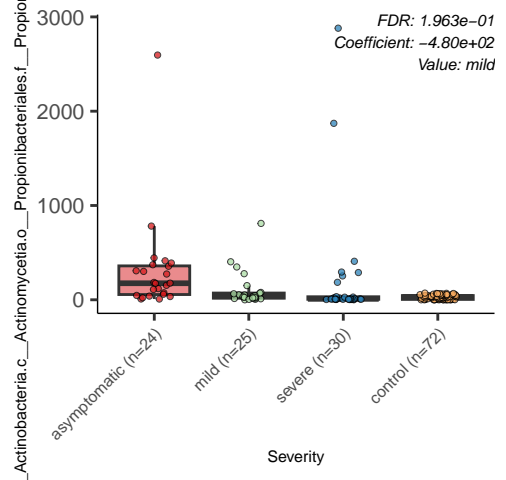



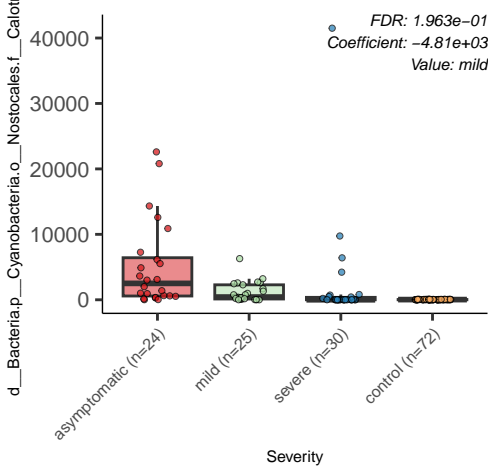

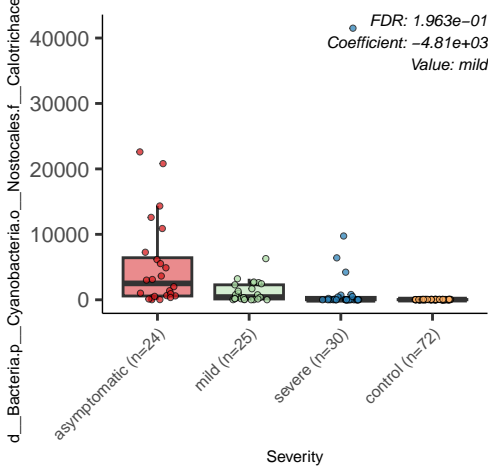

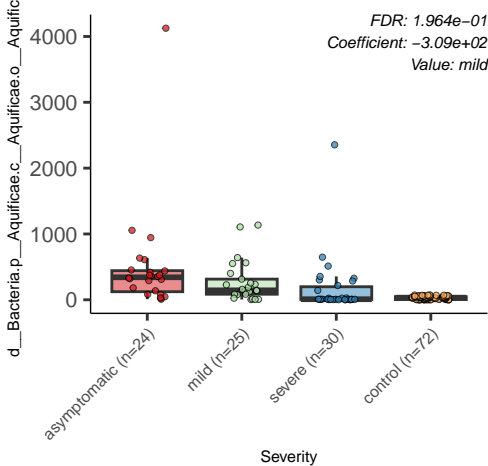

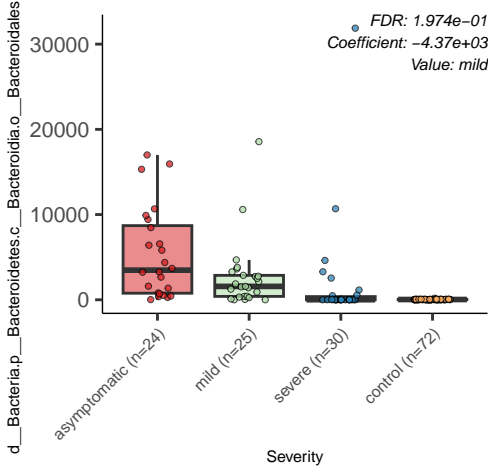

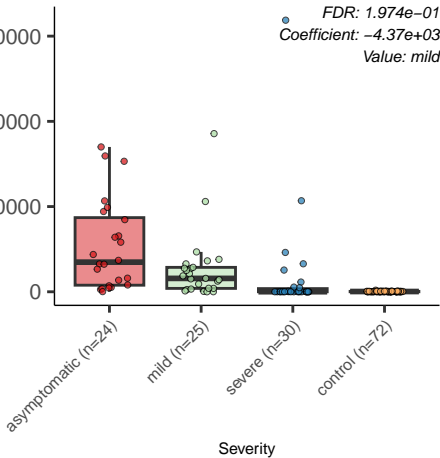

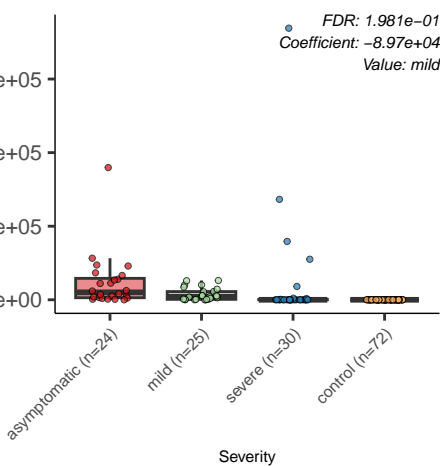

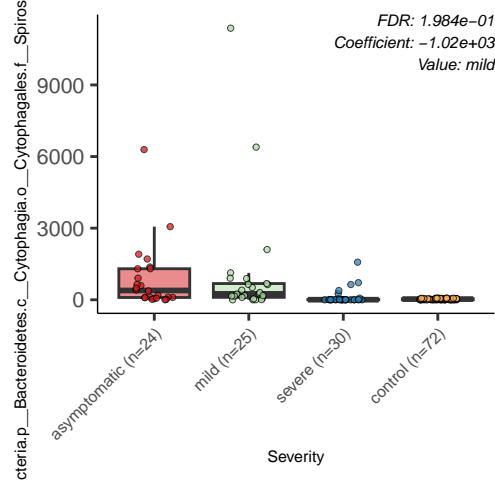

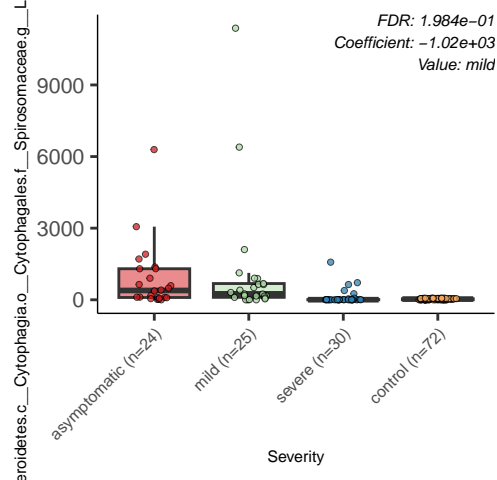



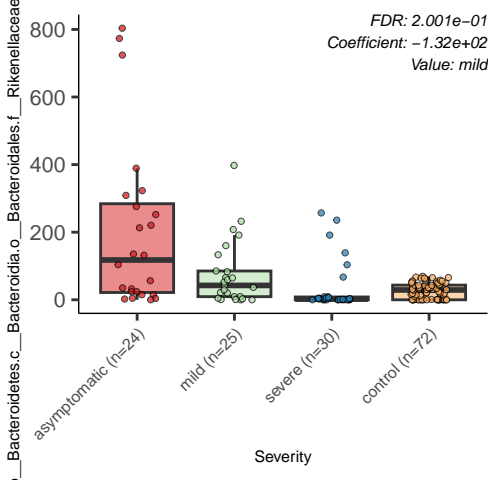

Firmicutes.c\_Bacilli.o\_Lactobacillales.f\_Lactobacillaceae.g\_La

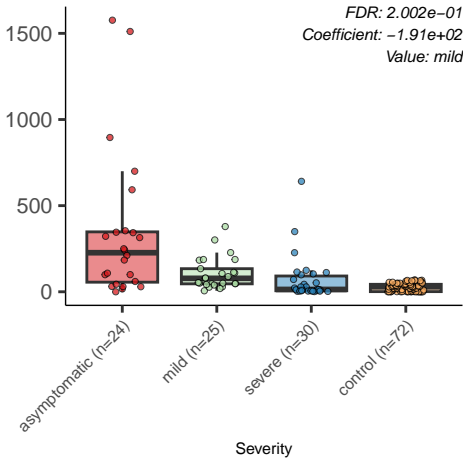

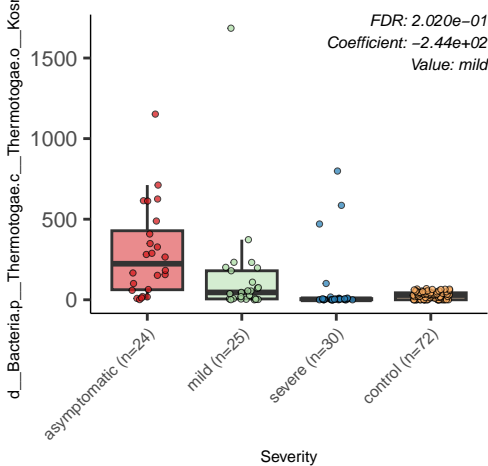

d\_Bacteria.p\_Thermotogae.c\_Thermotogae.o\_Kosmotogales

FDR: 2.020e-01  
Coefficient: -2.44e+02  
Value: mild

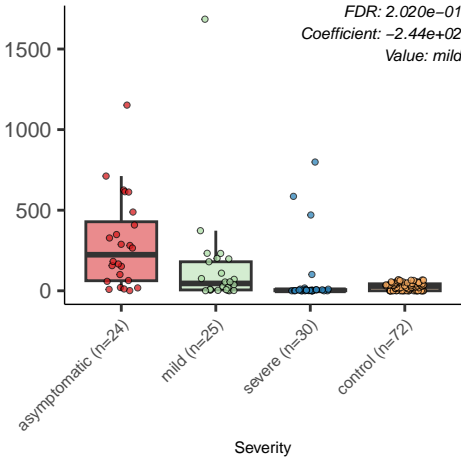

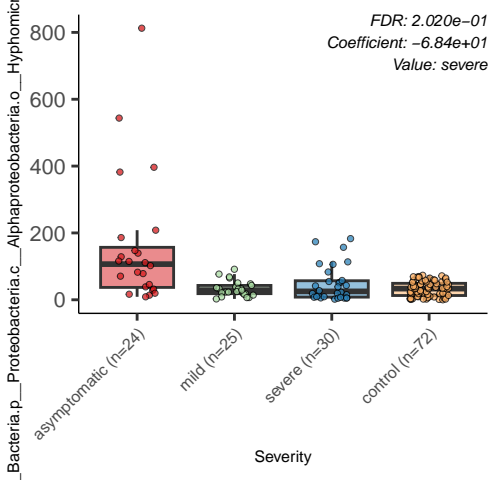

Actinobacteria.c\_Actinomycetia.o\_Pseudonocardiales.f\_Pseudo

FDR:  $2.020 \times 10^{-1}$   
Coefficient:  $-8.19 \times 10^2$   
Value: severe

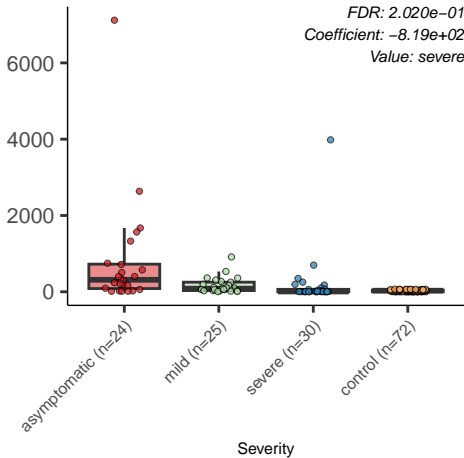

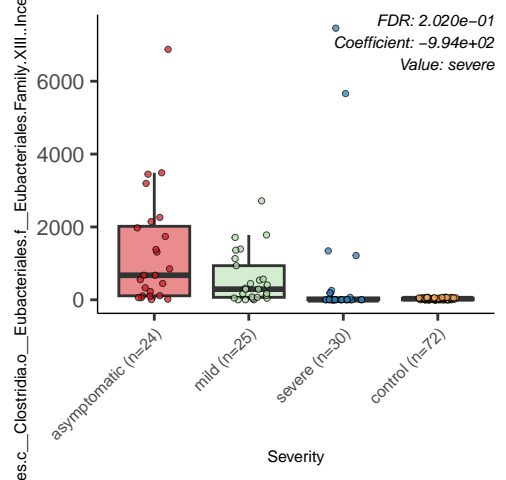

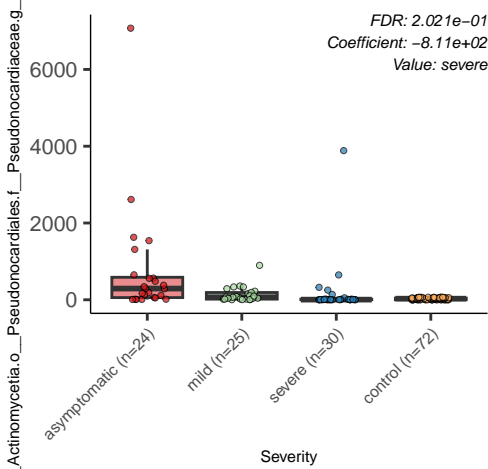



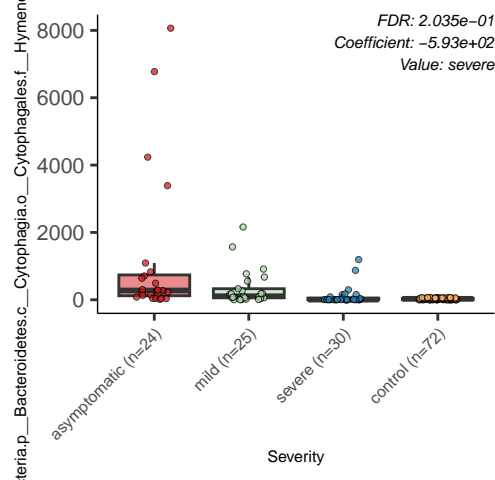

etes.c\_\_Spirochaetia.o\_\_Spirochaetales.f\_\_Treponemataceae.g\_\_T

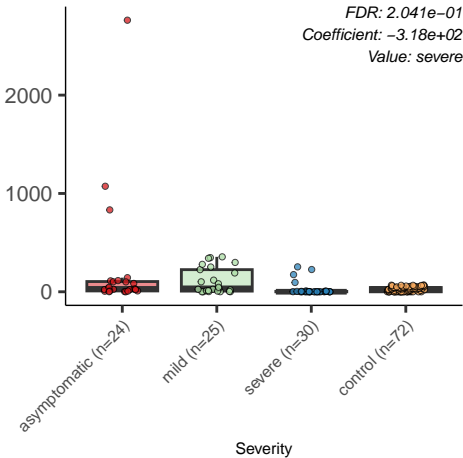

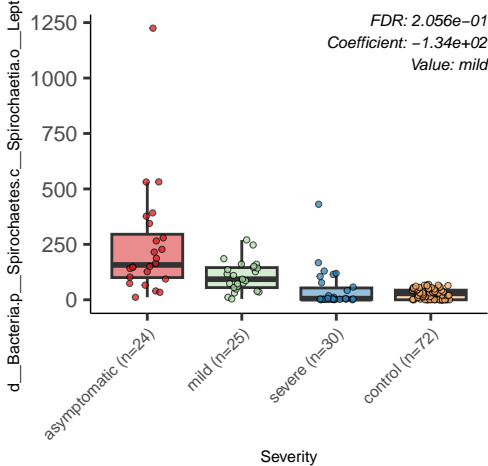

d\_Bacteria.p\_\_Spirochaetes.c\_\_Spirochaetia.o\_\_Leptospirales.

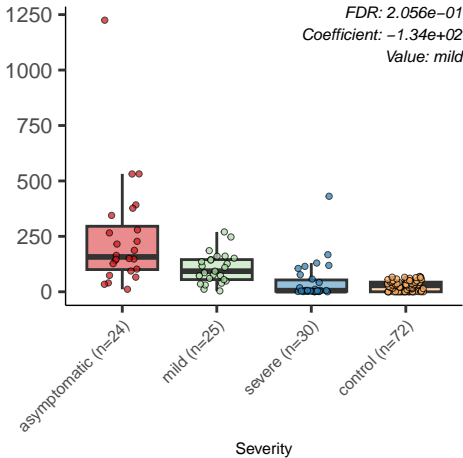

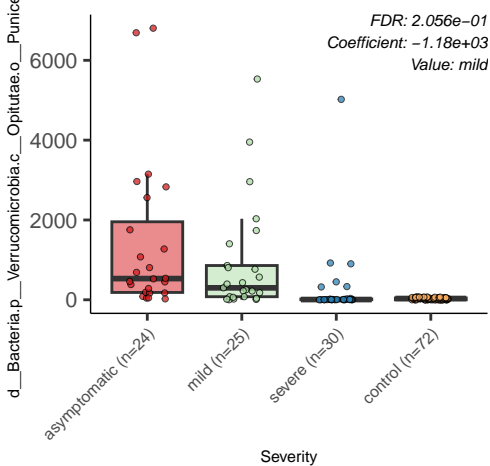

d\_Bacteria.p\_\_Verrucomicrobia.c\_\_Opitutae.o\_\_Puniceicoccales.t

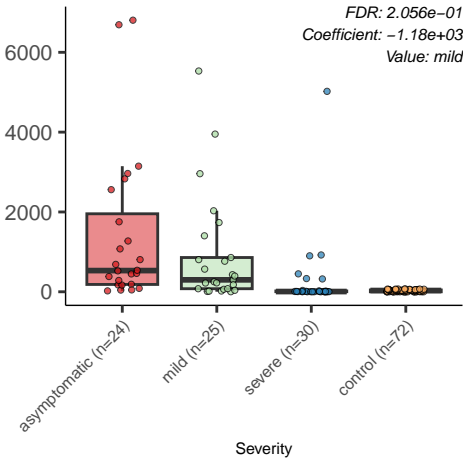

ss.c\_\_Synergistia.o\_\_Synergistales.f\_\_Synergistaceae.g\_\_Therman

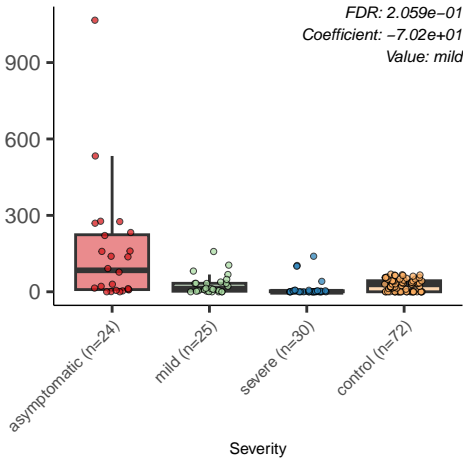

d\_Bacteria.p\_Firmicutes.c\_Bacilli.o\_Bacillales.f\_Paenibacillales

FDR: 2.074e-01  
Coefficient: 1.40e+02  
Value: severe

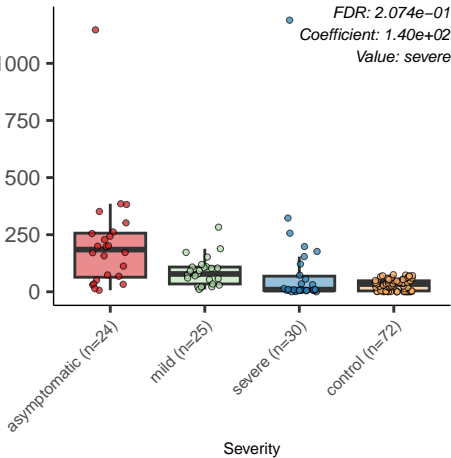



p\_Actinobacteria.c\_Actinomycetia.o\_Propionibacteriales.f\_Prop

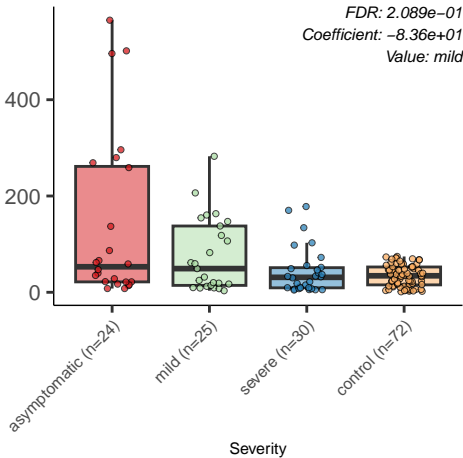

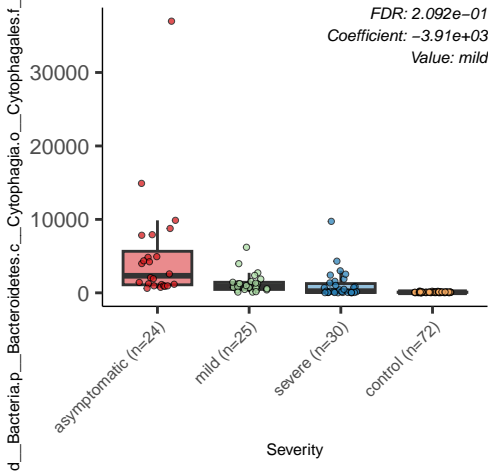

a.c.\_Gammaproteobacteria.o\_Pasteurellales.f\_Pasteurellaceae.g

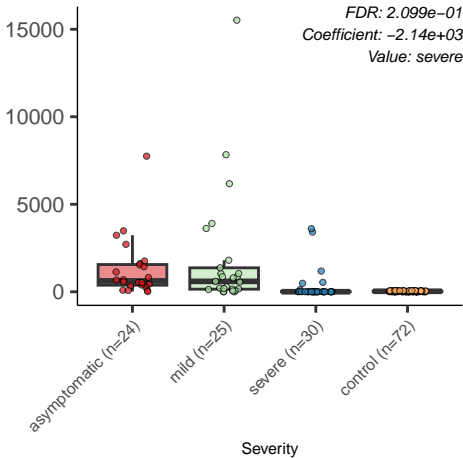

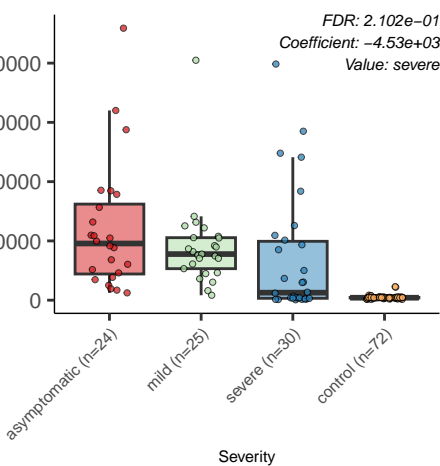

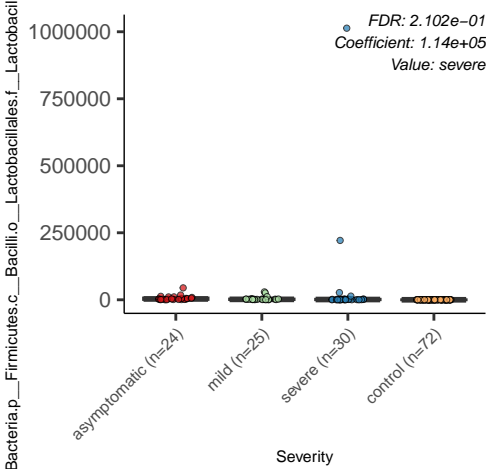

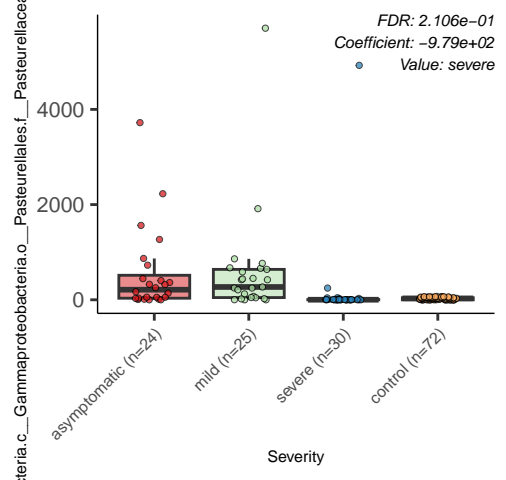

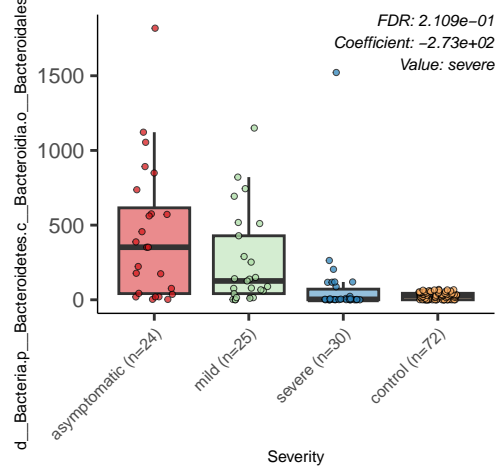

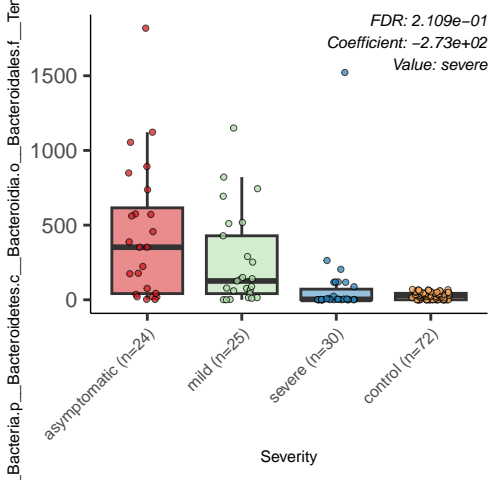



FDR:  $2.109e-01$   
Coefficient:  $-2.73e+02$   
Value: severe

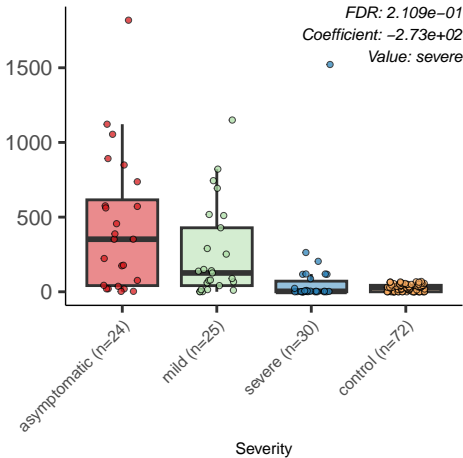

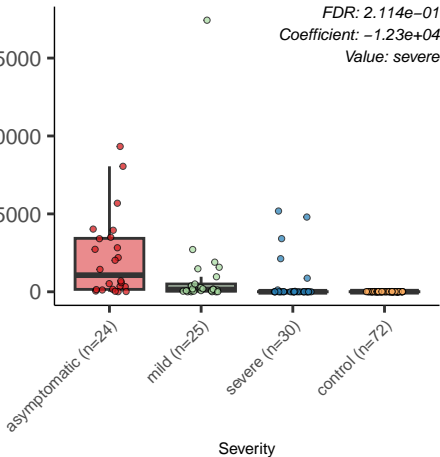

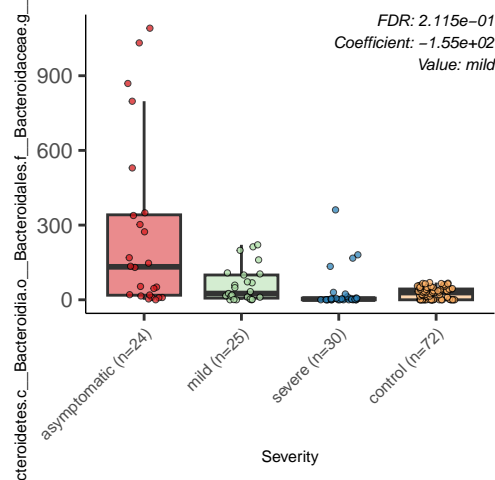

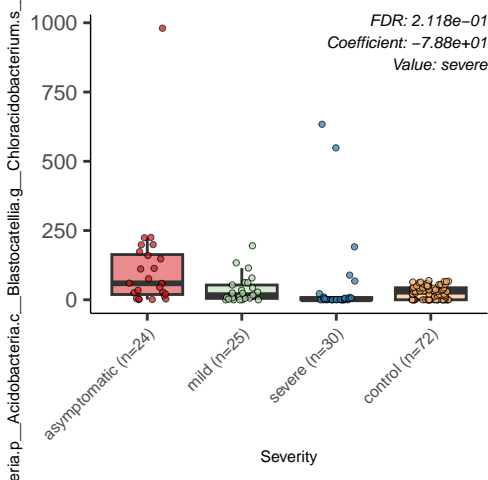

Bacteroidetes.c\_\_Bacteroidia.o\_\_Bacteroidales.f\_\_Muribaculaceae.g

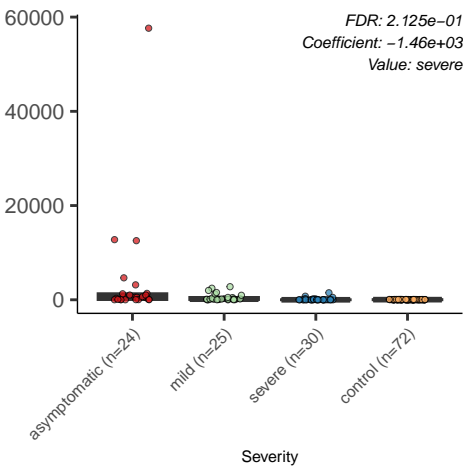

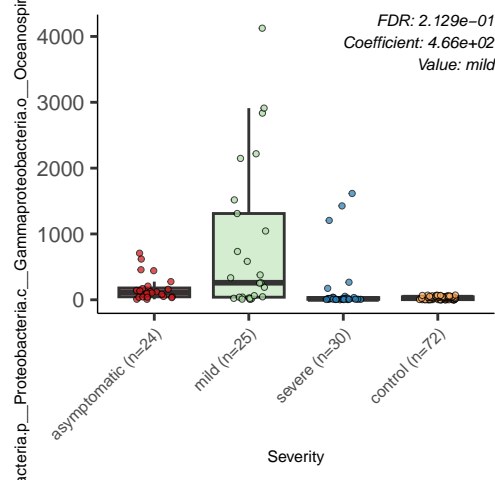

oteobacteria.c\_\_Betaproteobacteria.o\_\_Neisseriales.f\_\_Neisseriaceae

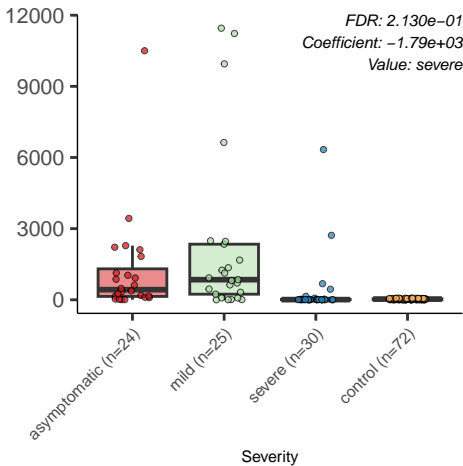

es.c\_\_Erysipelotrichia.o\_\_Erysipelotrichales.f\_\_Erysipelotrichaceae

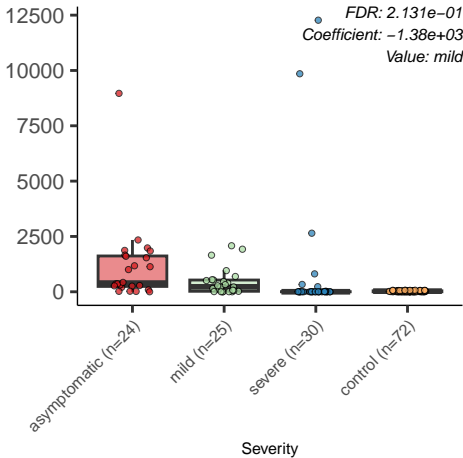



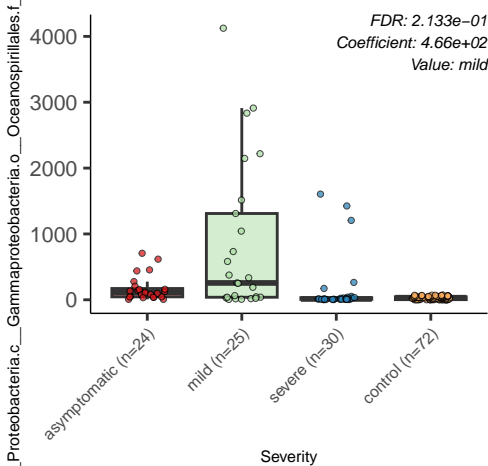

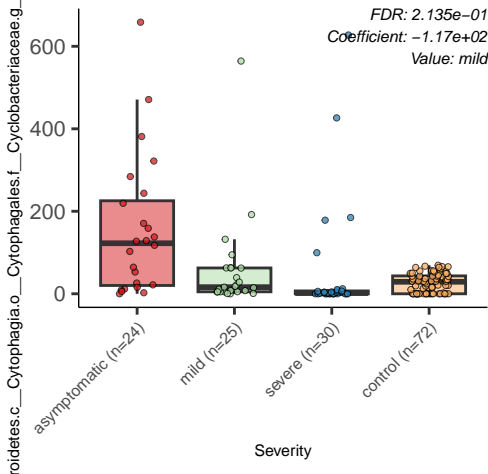

Bacteria.p\_Firmicutes.c\_Clostridia.o\_Eubacteriales.f\_Lachnosp

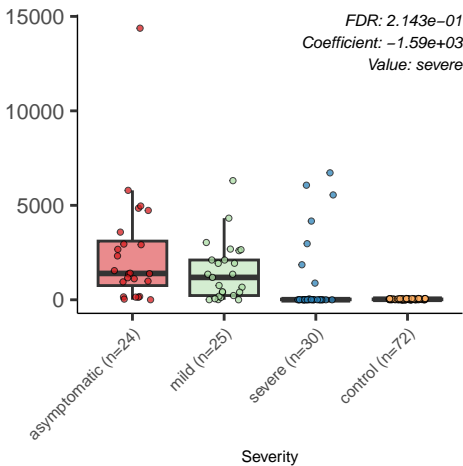

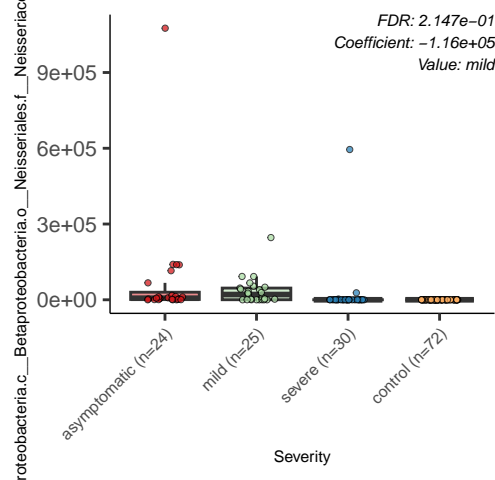

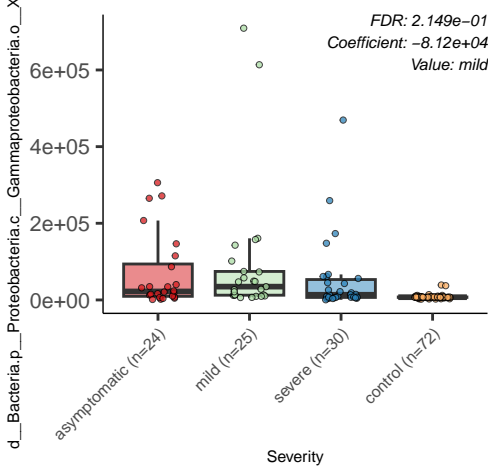

teria.p\_\_Proteobacteria.c\_\_Gammaproteobacteria.o\_\_Xanthomona

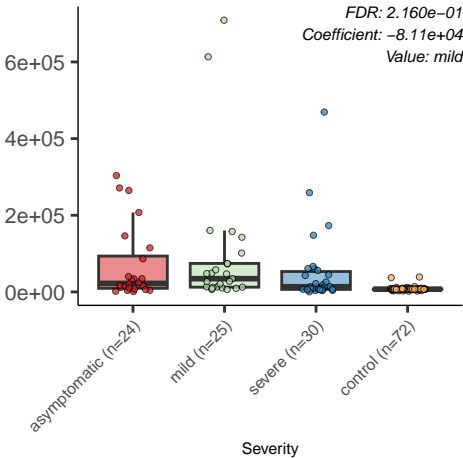

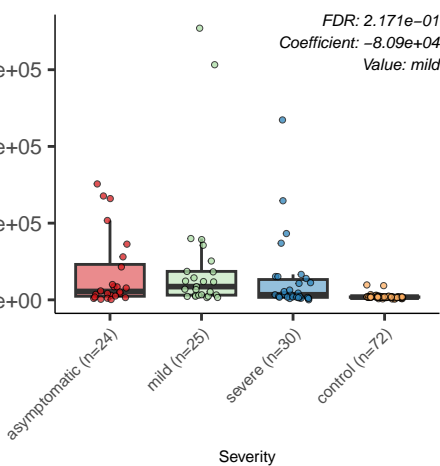

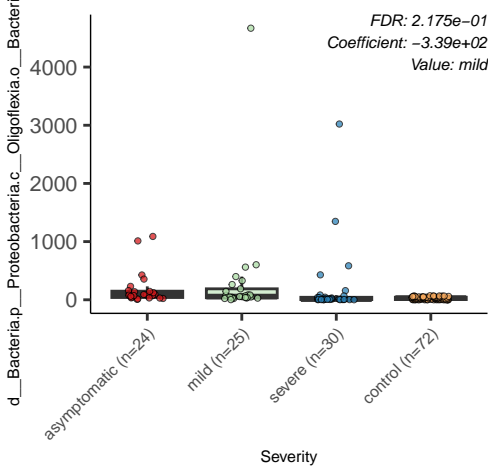



gammaproteobacteria.o\_\_Xanthomonadales.f\_\_Xanthomonadaceae

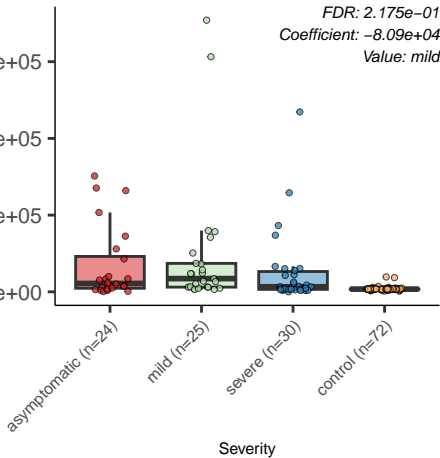

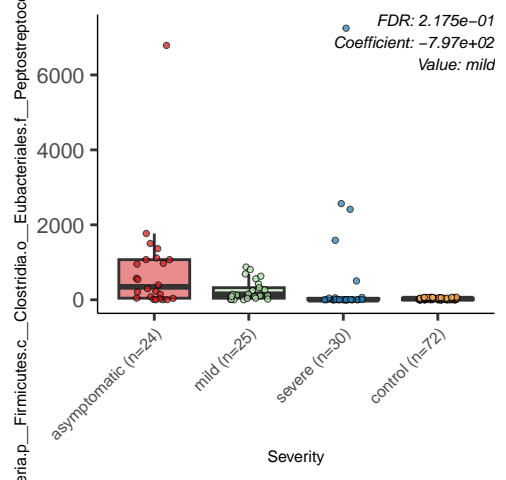

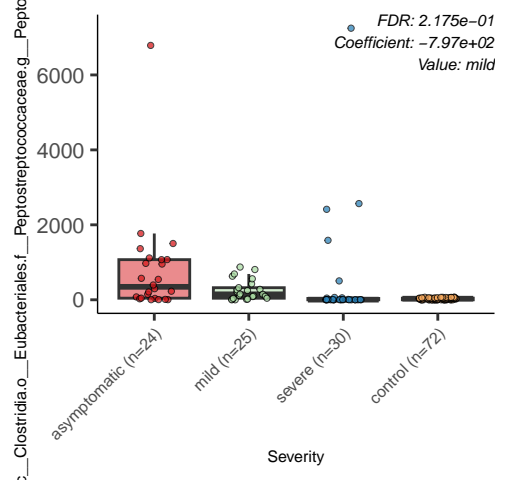

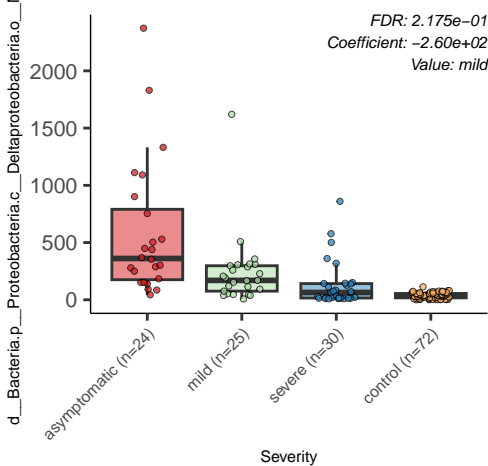

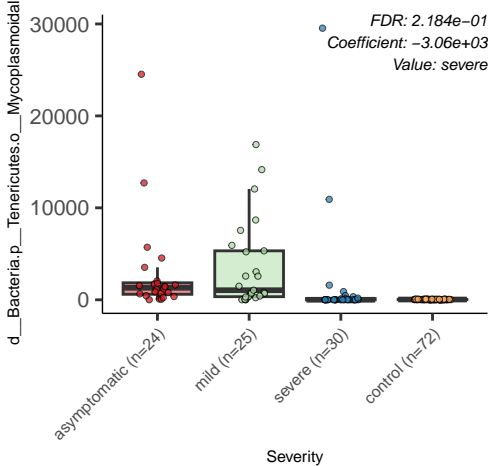

Bacteria.p\_Firmicutes.c\_Clostridia.o\_Eubacteriales.f\_Oscillosp

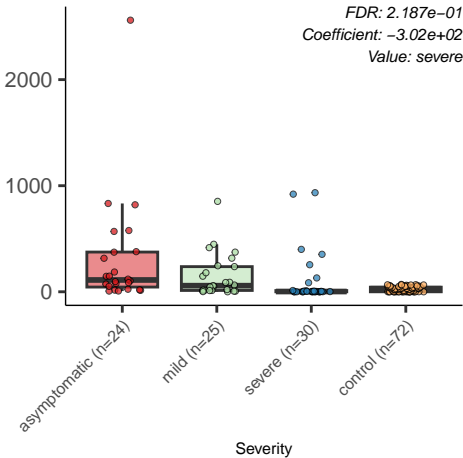

micutes.c\_\_Clostridia.o\_\_Eubacteriales.f\_\_Oscillospiraceae.g\_\_Ma

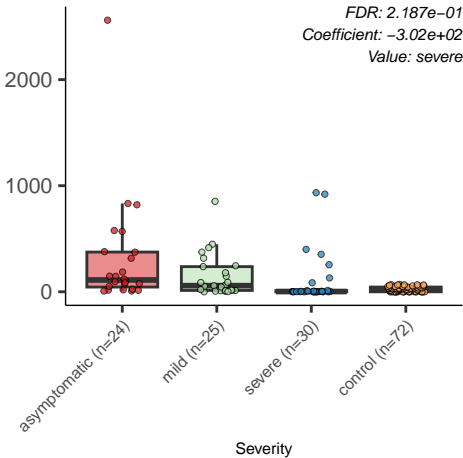

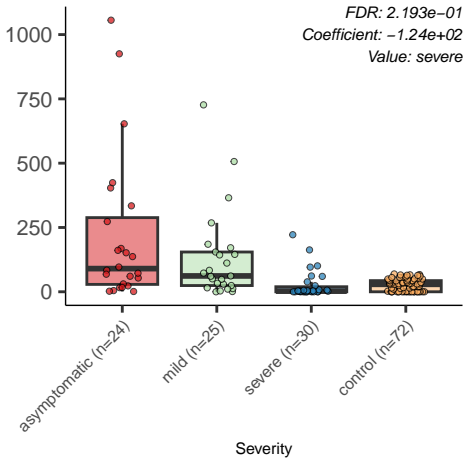



d\_\_Bacteria.p\_\_Armatimonadetes.c\_\_Fimbrimona

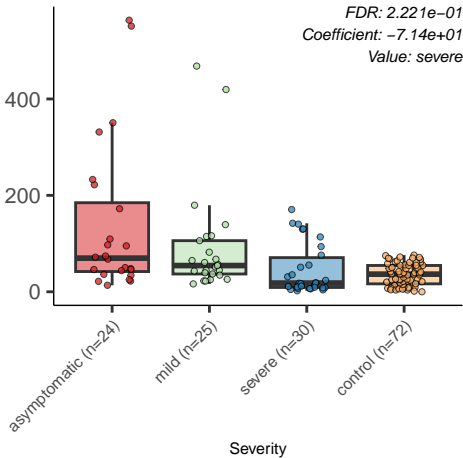

d\_Bacteria.p\_Armatimonadetes.c\_Fimbrimonadia.o\_Fin

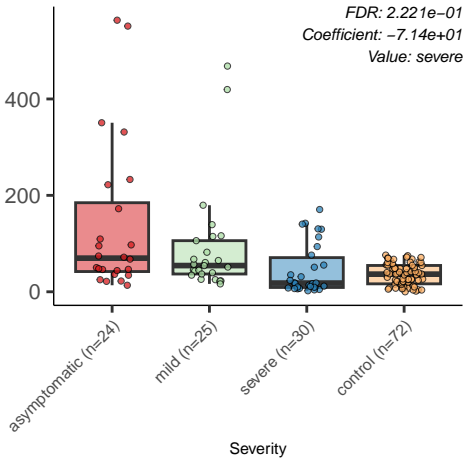

acteria.p\_\_Armatimonadetes.c\_\_Fimbriimonadia.o\_\_Fimbriimonada

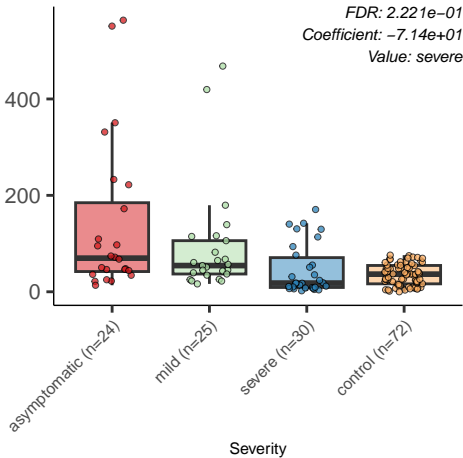

Armatimonadetes.c\_Fimbrimonadia.o\_Fimbrimonadales.f\_Fi

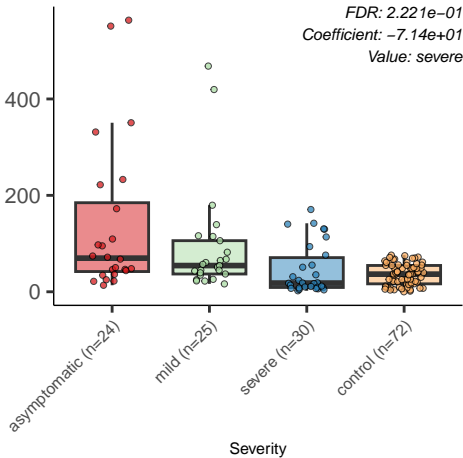

detes.c\_\_Fimbriimonadia.o\_\_Fimbriimonadales.f\_\_Fimbriimonadace

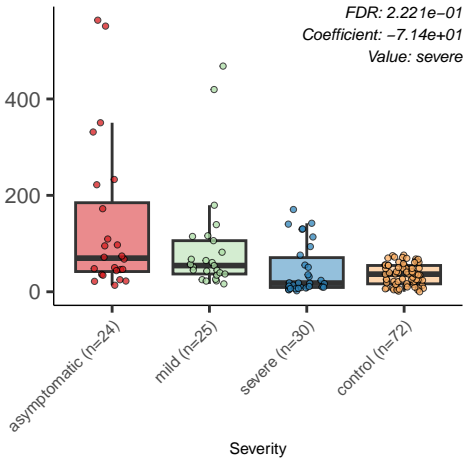

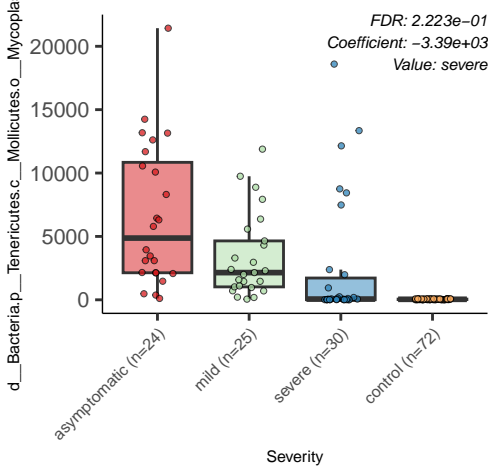

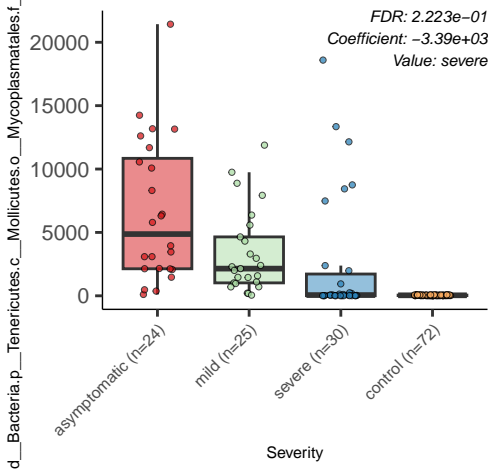

Bacteria.p\_Firmicutes.c\_Bacilli.o\_Lactobacillales.f\_Enterococ

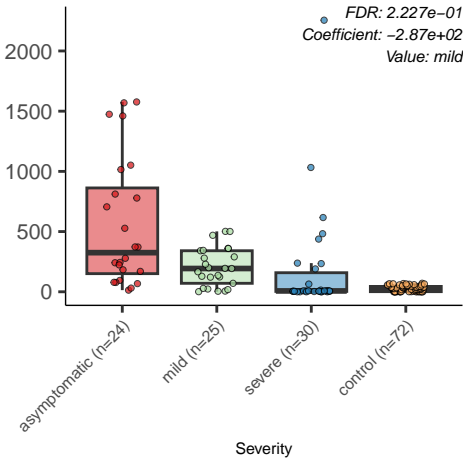



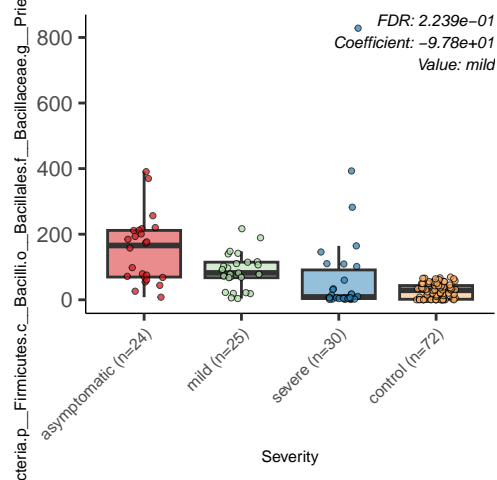

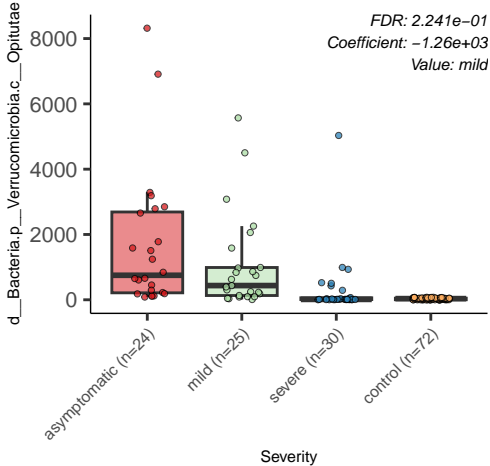

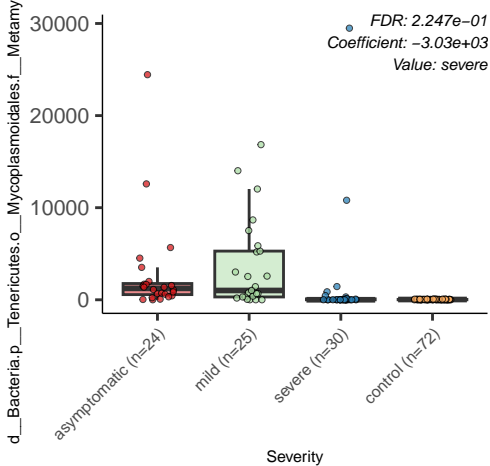

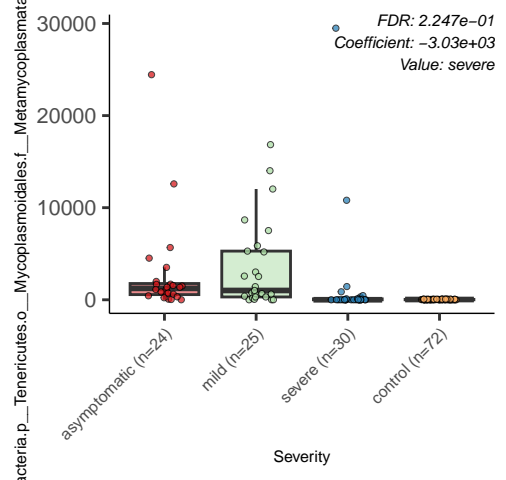

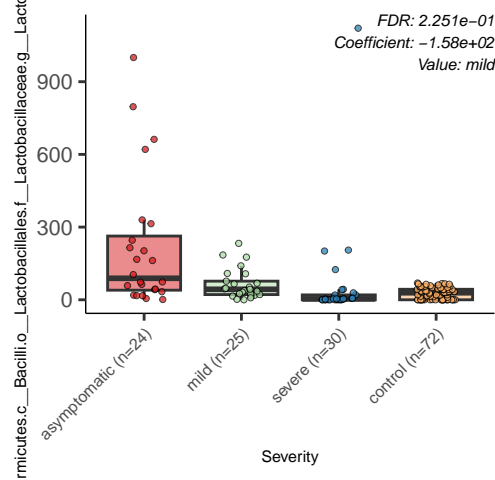

a.p\_Firmicutes.c\_Clostridia.o\_Eubacteriales.f\_Lachnospiraceae

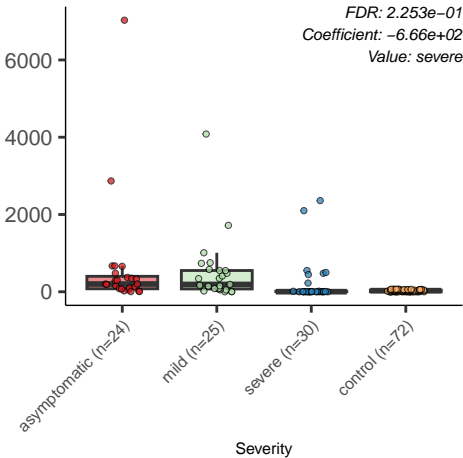

Firmicutes.c\_\_Clostridia.o\_\_Eubacteriales.f\_\_Clostridiaceae.g\_\_

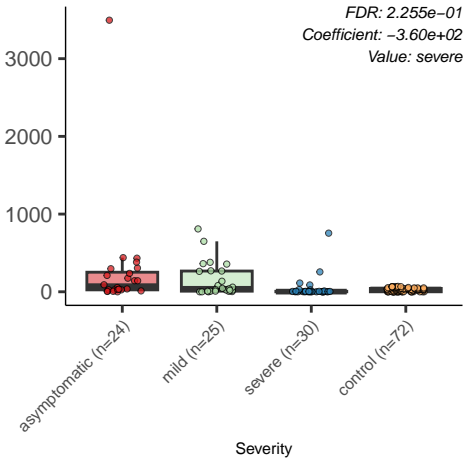

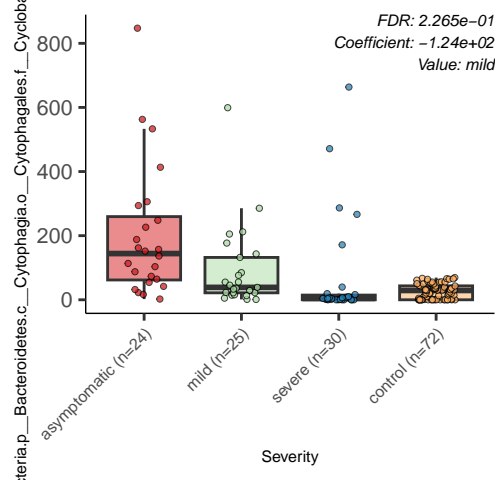



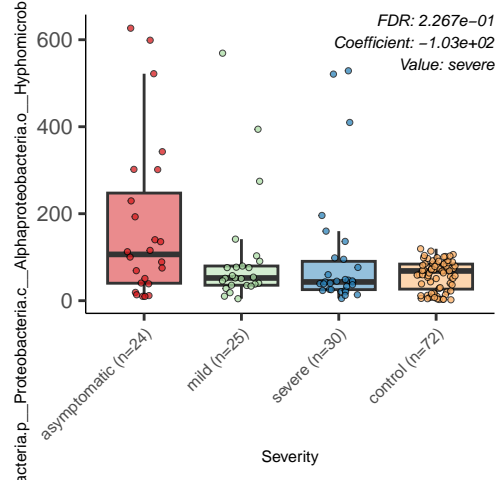

a.c.\_Alphaproteobacteria.o\_\_Hyphomicrobiales.f\_\_Rhizobiaceae.g

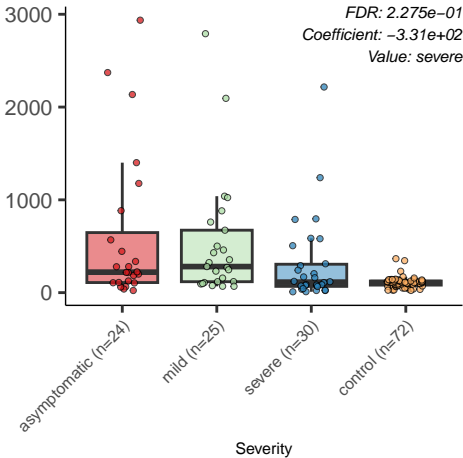

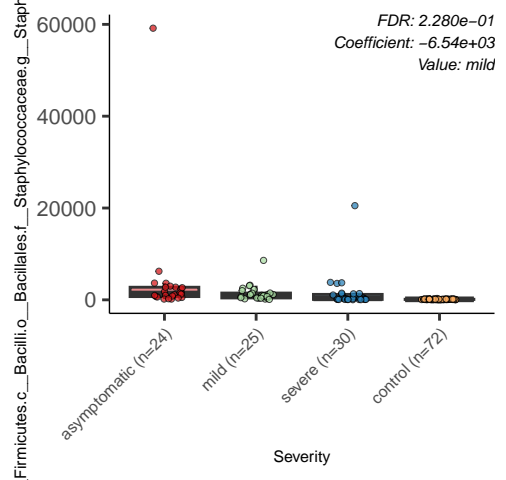

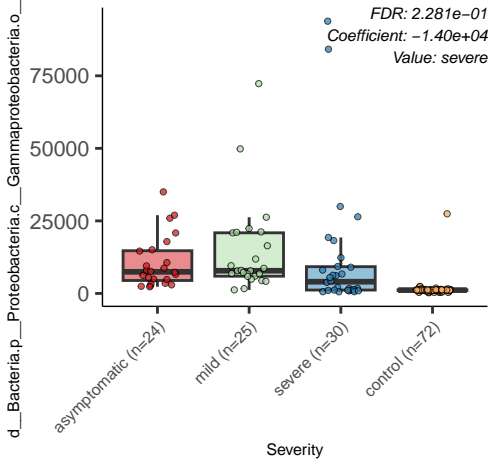

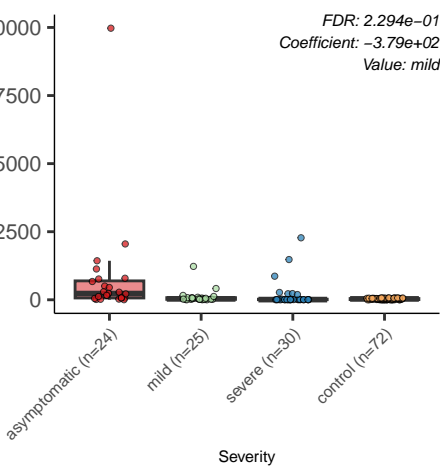

bacteria.c\_Actinomycetia.o\_Actinomycetales.f\_Actinomycetaceae

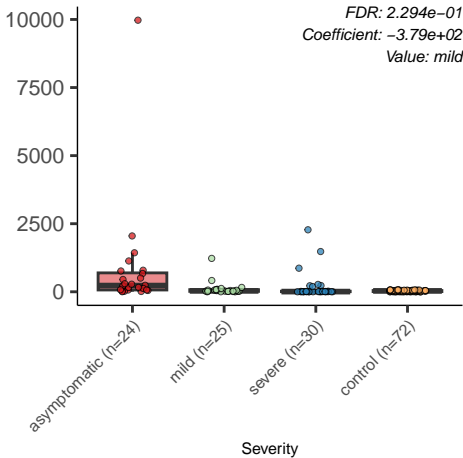

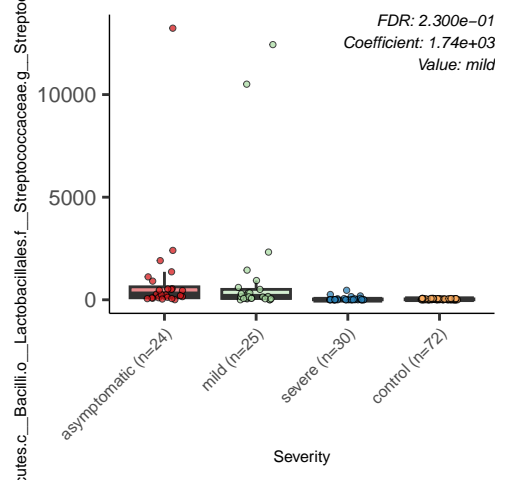

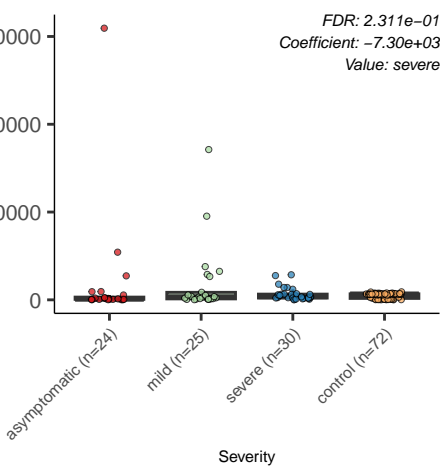



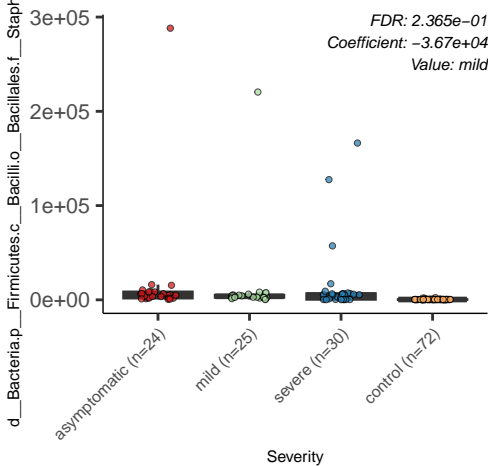

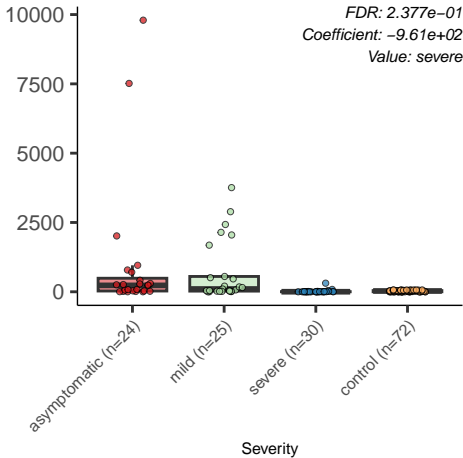

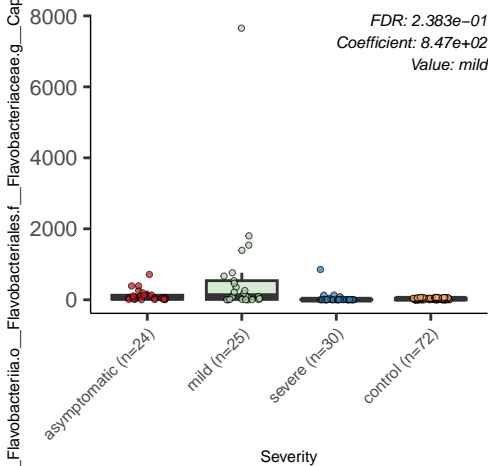

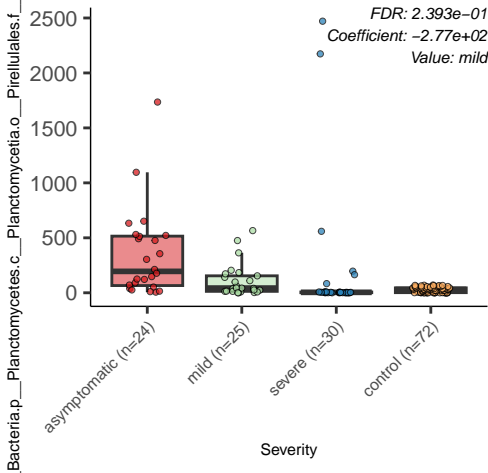

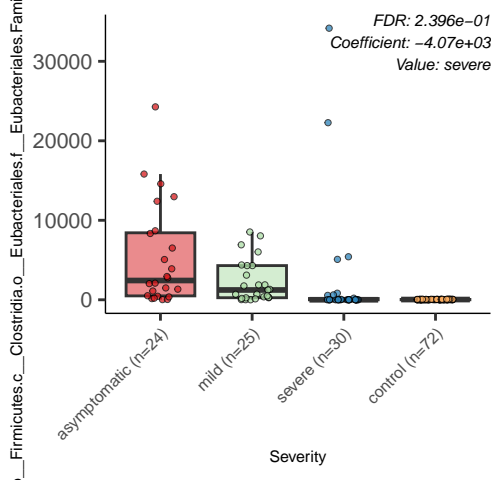

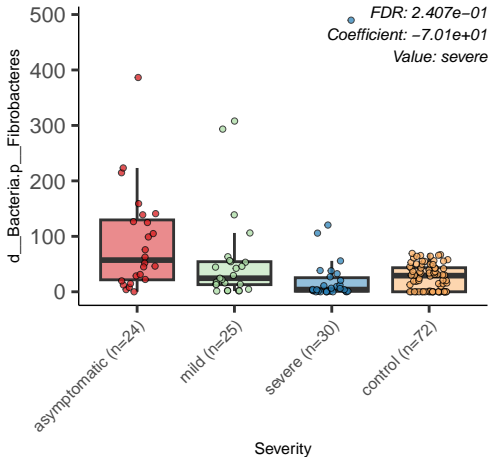

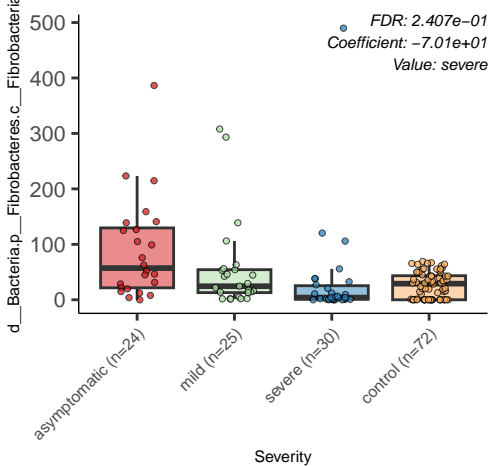

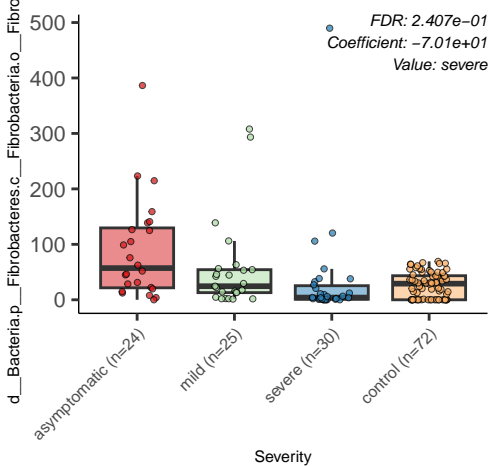



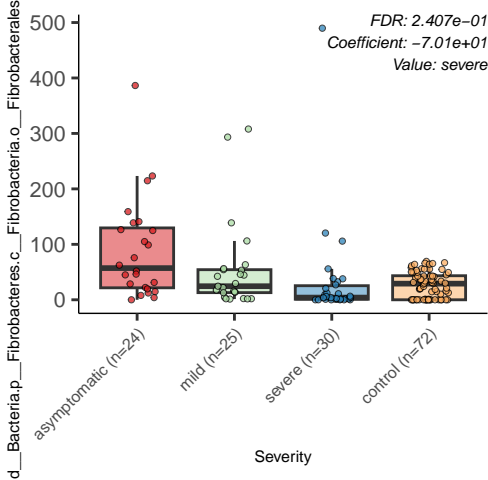

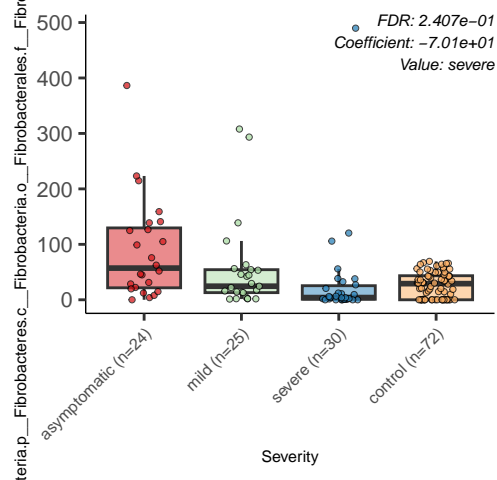

acteres.c\_\_Fibrobacteria.o\_\_Fibrobacterales.f\_\_Fibrobacteraceae.g

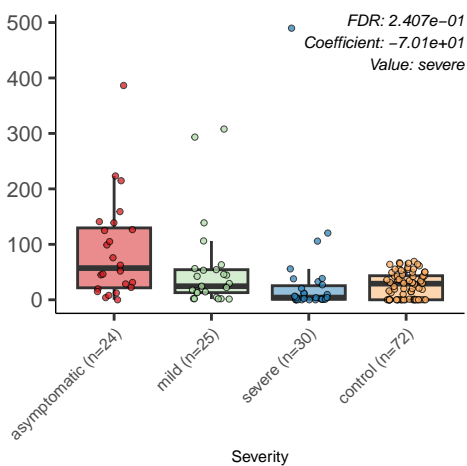

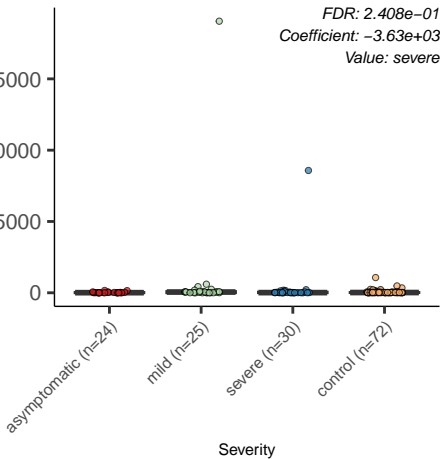

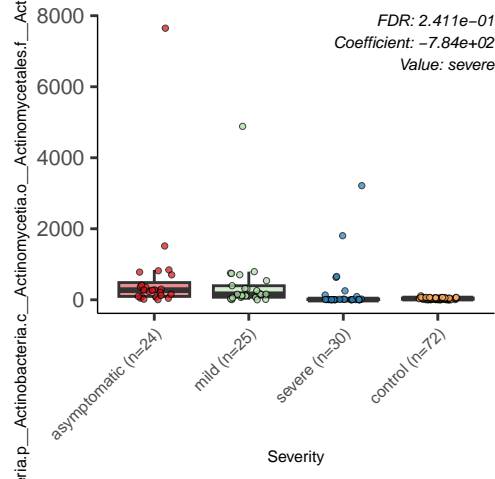

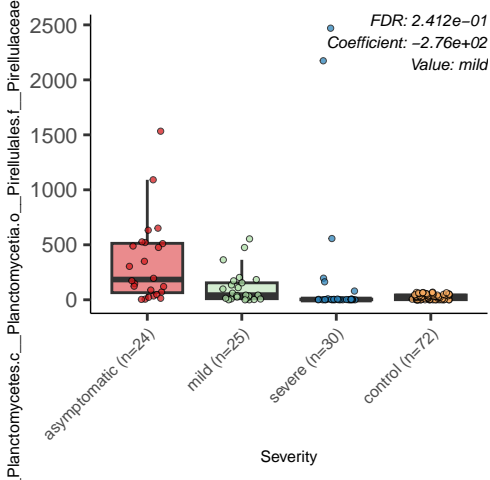

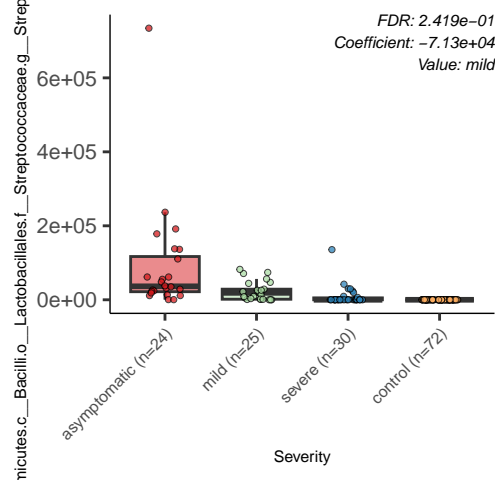

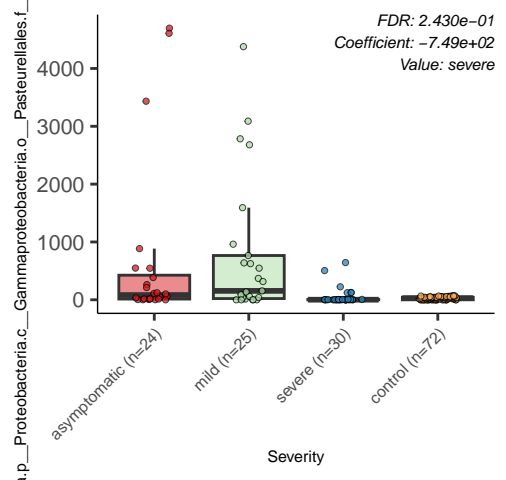



acteria.c\_\_Gammaproteobacteria.o\_\_Pasteurellales.f\_\_Pasteurellae

FDR: 2.430e-01  
Coefficient: -7.49e+02  
Value: severe

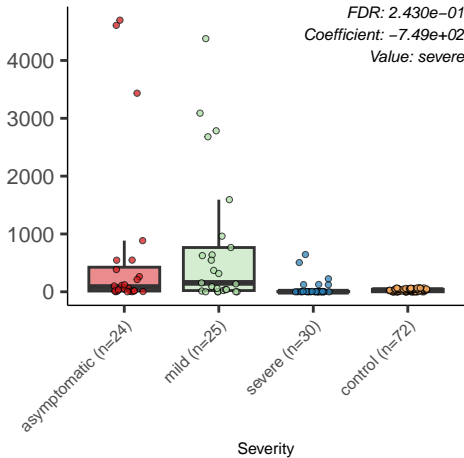

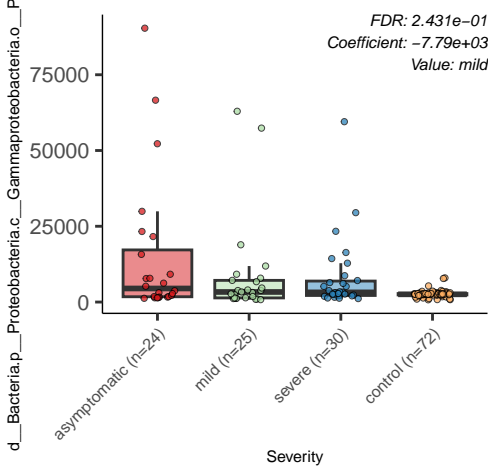

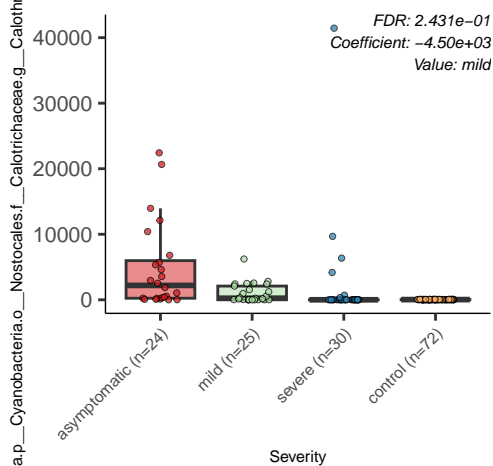

d\_Bacteria.p\_Bacteroidetes.c\_\_Chitinophagii

FDR:  $2.459 \times 10^{-1}$   
Coefficient:  $-6.54 \times 10^2$   
Value: severe

4000  
2000  
0

asymptomatic (n=24)

mild (n=25)

severe (n=30)

control (n=72)

Severity

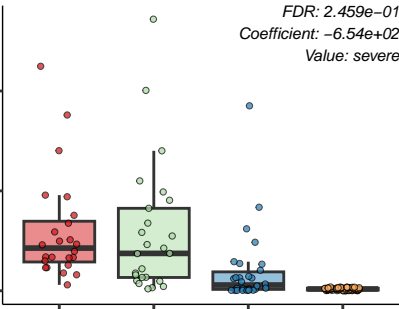

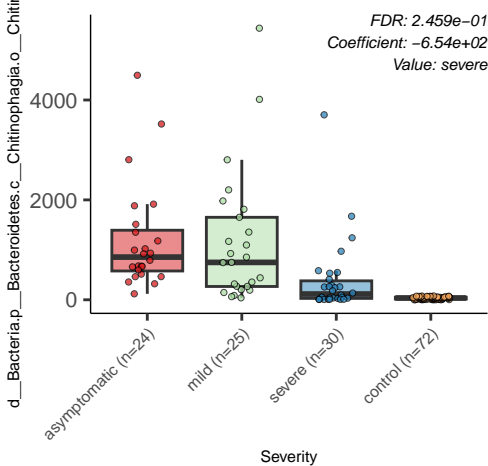

4\_Bacteria.p\_Bacteroidetes.c\_Chitinophagia.o\_Chitinophagales

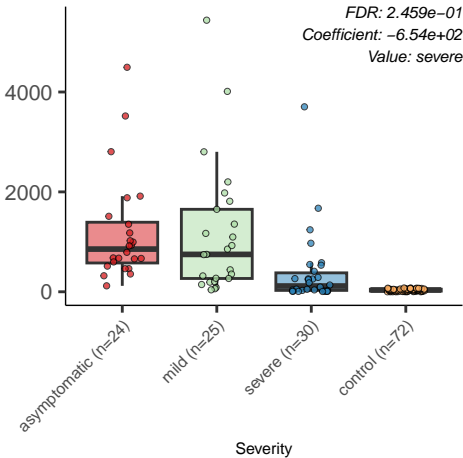

eria.p\_\_Proteobacteria.c\_\_Gammaproteobacteria.o\_\_Pseudomona

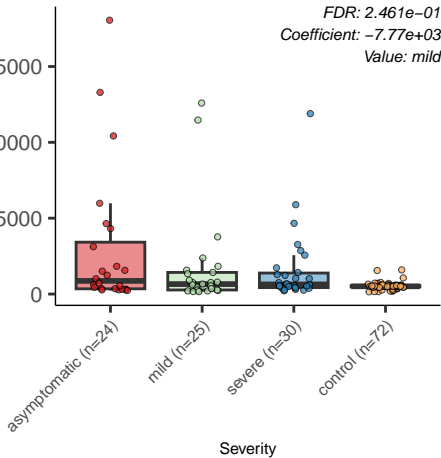

Supplement: s1 [file s1]
