# Supplementary material for: Metatranscriptome Analysis of Nasopharyngeal Swabs across the Varying Severity of COVID-19 Disease Demonstrated Unprecedented Species Diversity
Source: MDPI journal article supplement (doi:10.3390/microorganisms11071804), 2023-07-14

c\_Actinomycetia.o\_Propionibacteriales.f\_Propionibacteriaceae.g

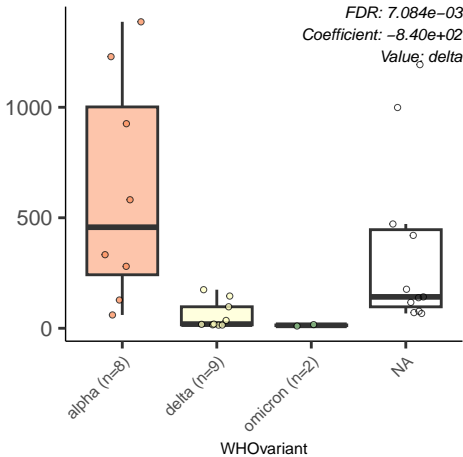

i.p\_\_Proteobacteria.c\_\_Alphaproteobacteria.o\_\_Hyphomicrobiales.f

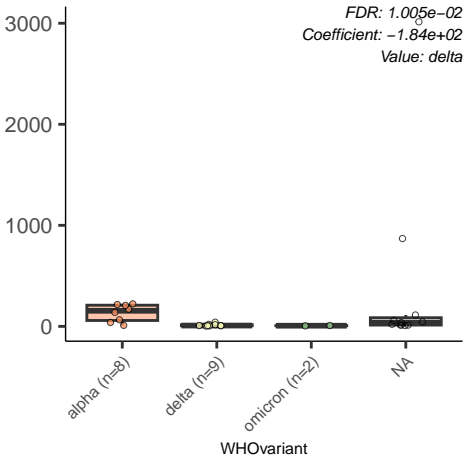

c\_Actinomycetia.o\_Propionibacteriales.f\_Propionibacteriaceae.g

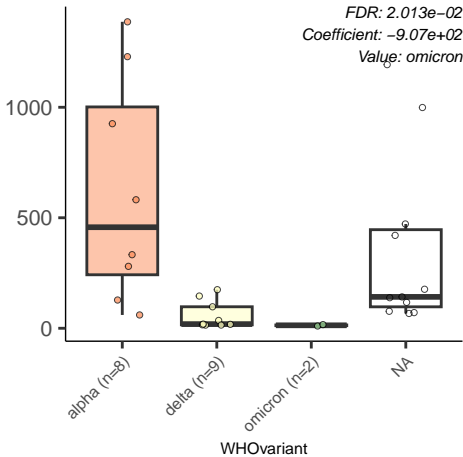

icutes.c\_\_Tissierellia.o\_\_Tissierellales.f\_\_Peptoniphilaceae.g\_\_Ana

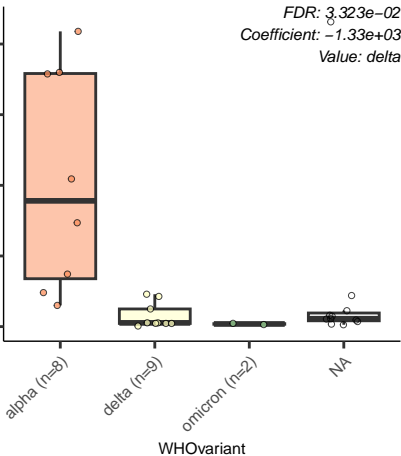

i.p\_\_Proteobacteria.c\_\_Alphaproteobacteria.o\_\_Hyphomicrobiales.f

FDR:  $4.208e-02$   
Coefficient:  $-1.79e+02$   
Value: omicron

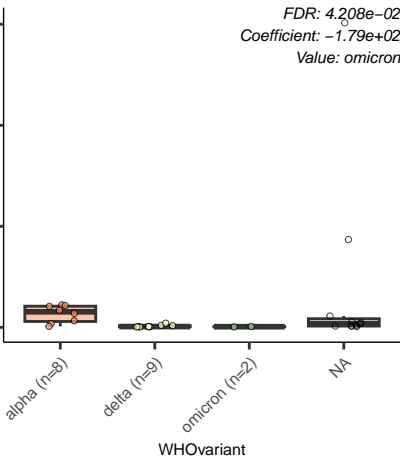

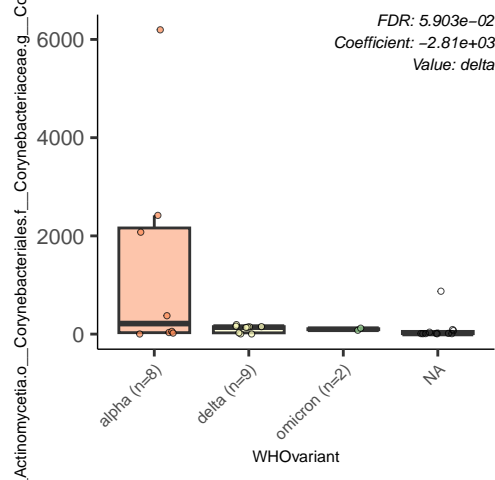

icutes.c\_\_Tissierellia.o\_\_Tissierellales.f\_\_Peptoniphilaceae.g\_\_Ana

FDR:  $7.682e-02$   
Coefficient:  $-1.41e+03$   
Value: omicron

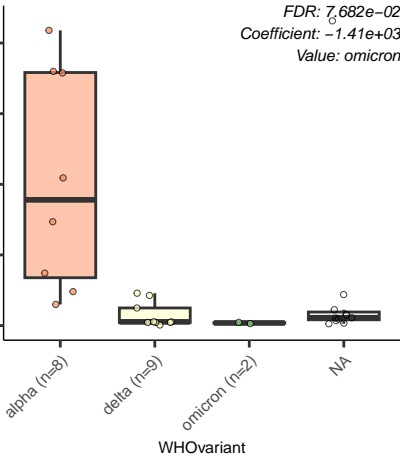

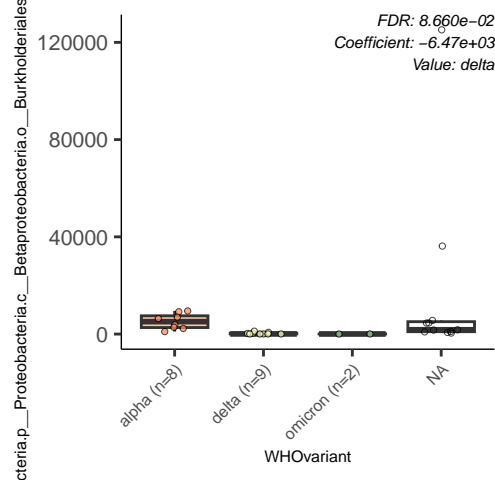



Actinomycetia.o\_\_Corynebacteriales.f\_\_Corynebacteriaceae.g\_\_

FDR: 8.799e-02  
Coefficient: -3.05e+03  
Value: delta

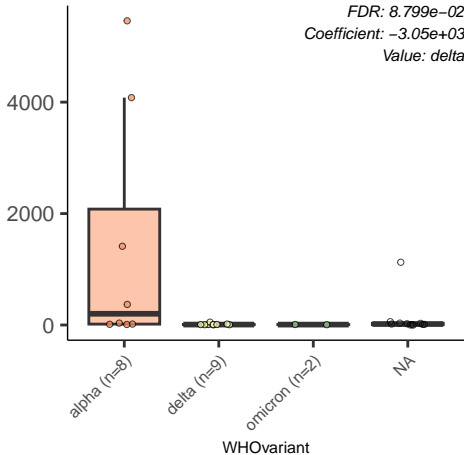

ia.c\_\_Actinomycetia.o\_\_Propionibacteriales.f\_\_Propionibacteriaceae

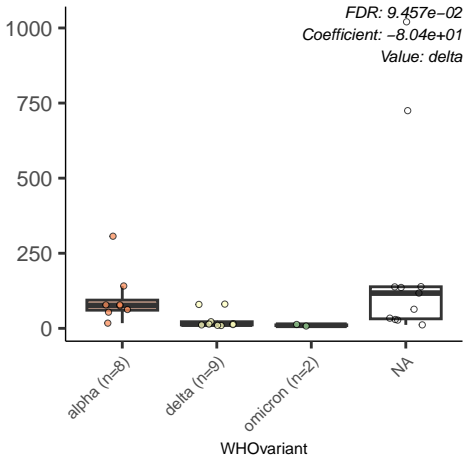

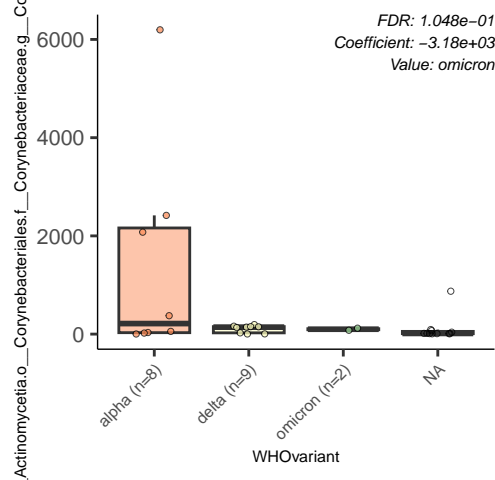

obacteria.c\_\_Betaproteobacteria.o\_\_Burkholderiales.f\_\_Comamonad

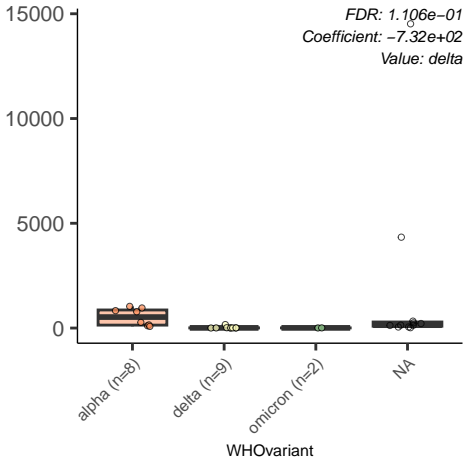

proteobacteria.o\_\_Burkholderiales.f\_\_Comamonadaceae.g\_\_Candid

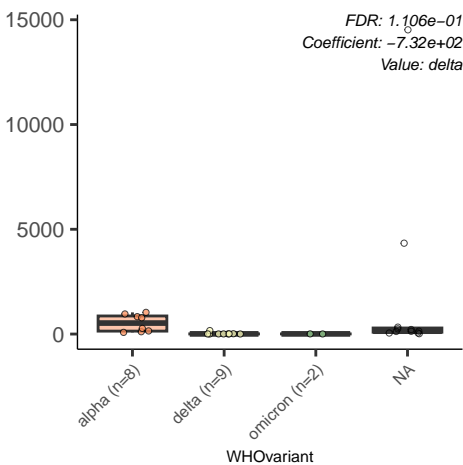

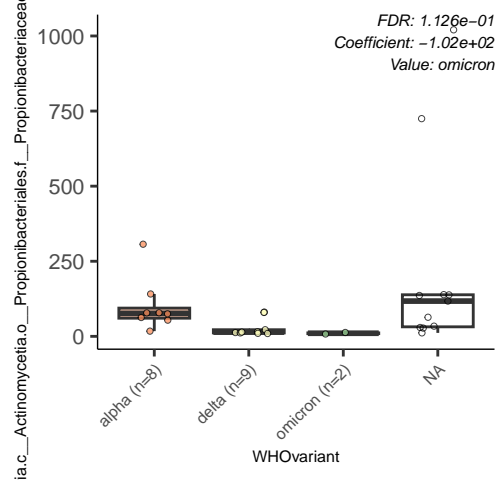

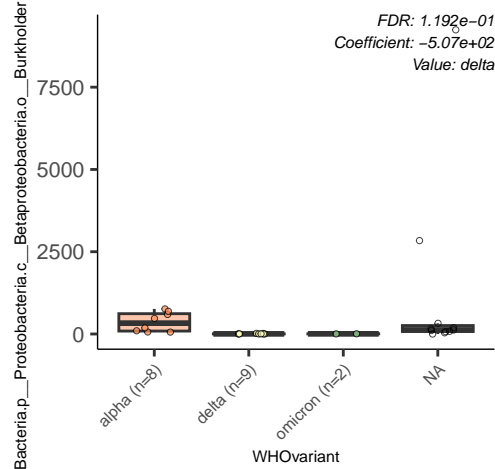

Proteobacteria.c\_\_Betaproteobacteria.o\_\_Burkholderiales.g\_\_Aquino

FDR:  $1.192e-01$   
Coefficient:  $-5.07e+02$   
Value: delta

7500

5000

2500

0

alpha (n=8)

delta (n=9)

omicron (n=2)

NA

WHOvariant

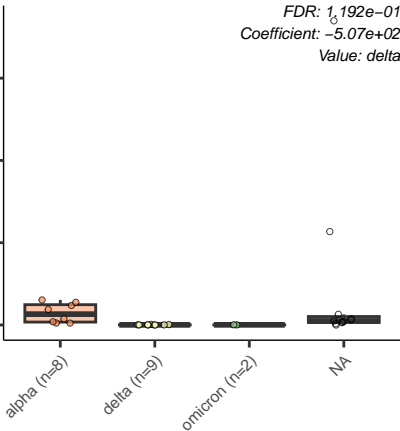



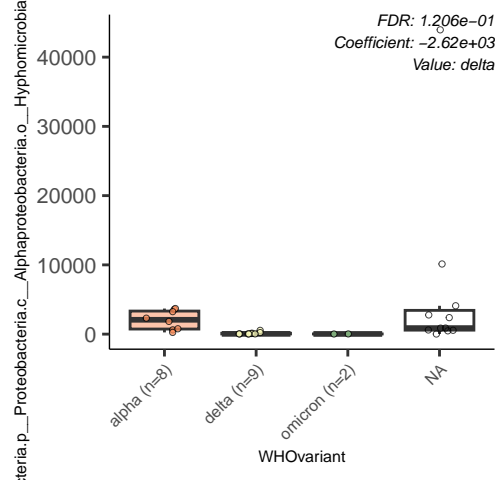

d\_Bacteria.p\_Actinobacteria.c\_Actinomycetia.o\_Coryneb

FDR: 1.208e-01  
Coefficient: -1.21e+05  
Value: delta

2e+05

1e+05

0e+00

alpha (n=8)

delta (n=9)

omicron (n=2)

NA

WHOvariant

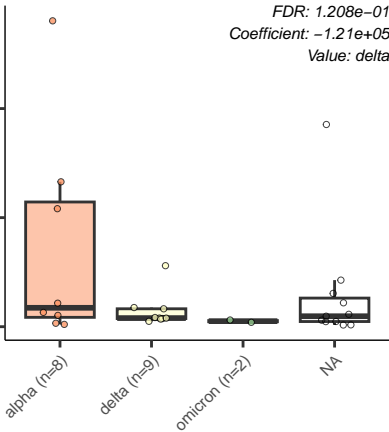

bacteria.p\_\_Actinobacteria.c\_\_Actinomycetia.o\_\_Corynebacteriales.f\_\_

FDR: 1.279e-01  
Coefficient: -1.21e+05  
Value: delta

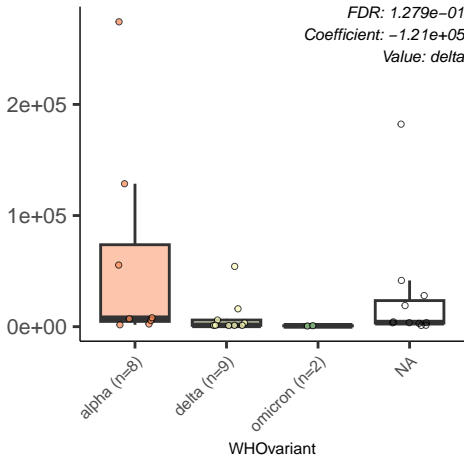

Actinobacteria.c\_\_Actinomycetia.o\_\_Corynebacterales.f\_\_Coryneb

FDR: 1.279e-01  
Coefficient: -1.21e+05  
Value: delta

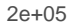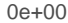

alpha (n=8)

delta (n=9)

omicron ( $n=2$ )

NA

WHOvariant

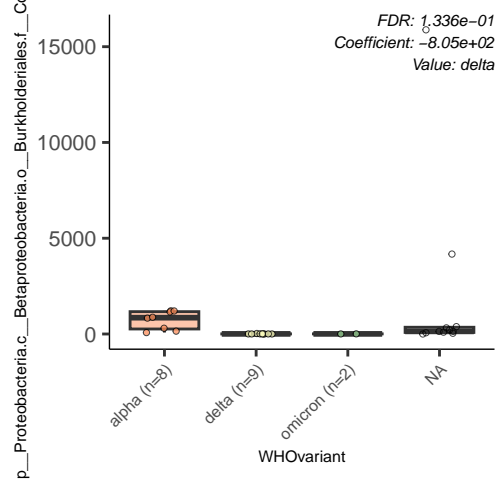

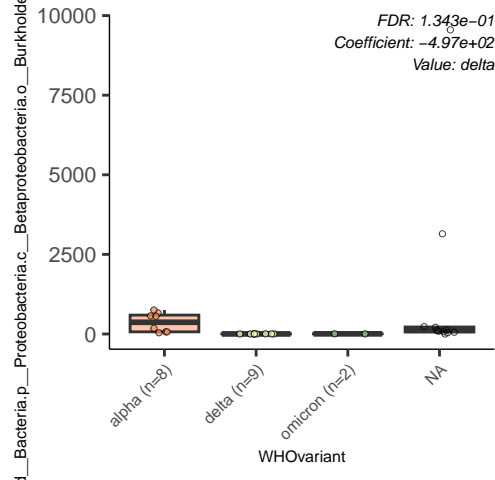

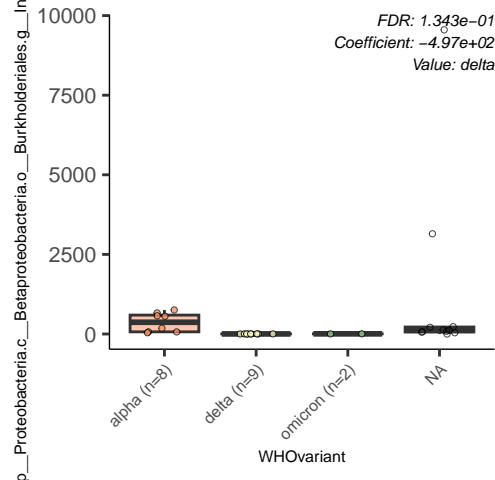

Proteobacteria.c\_\_Betaproteobacteria.o\_\_Burkholderiales.f\_\_Com

FDR:  $1.368e-01$   
Coefficient:  $-1.64e+03$   
Value: delta

30000

20000

10000

0

alpha (n=8)

delta (n=9)

omicron (n=2)

NA

WHOvariant

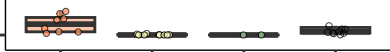



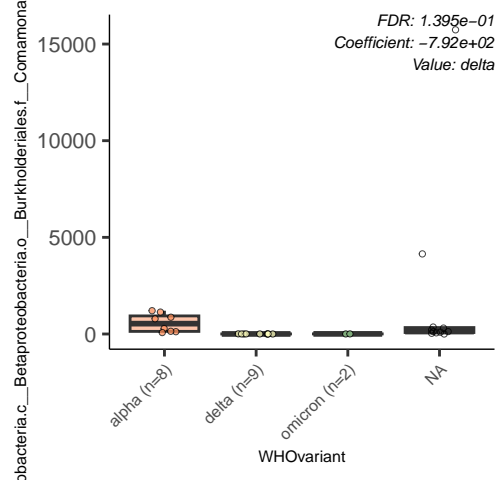

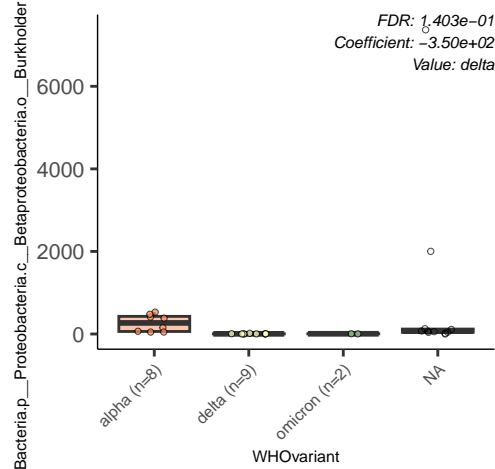

Proteobacteria.c\_\_Betaproteobacteria.o\_\_Burkholderiales.g\_\_Lep

FDR:  $1.403e-01$   
Coefficient:  $-3.50e+02$   
Value: delta

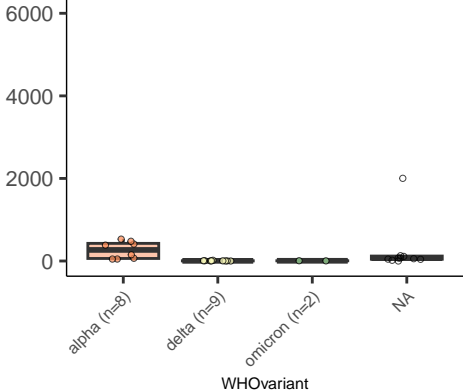

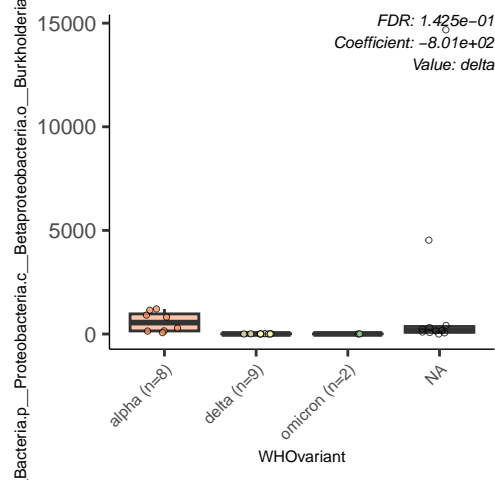

psilonproteobacteria.o\_\_Campylobacterales.f\_\_Campylobacteraceae

FDR:  $1.441e-01$   
Coefficient:  $7.55e+00$   
Value: omicron

2000

1000

0

alpha (n=8)

delta (n=9)

omicron (n=2)

NA

WHOvariant

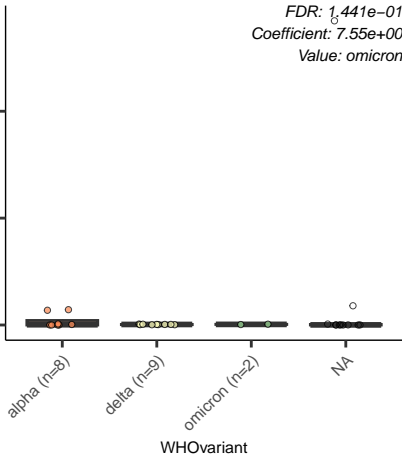

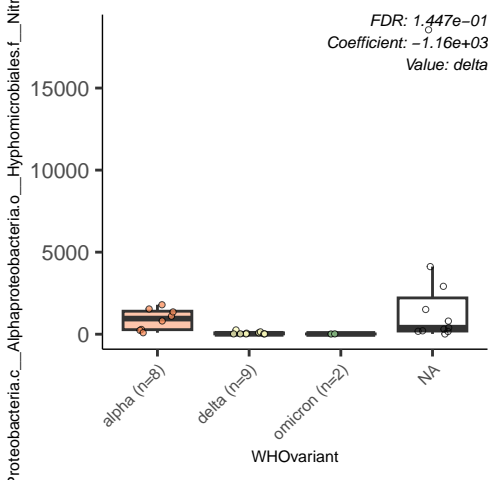

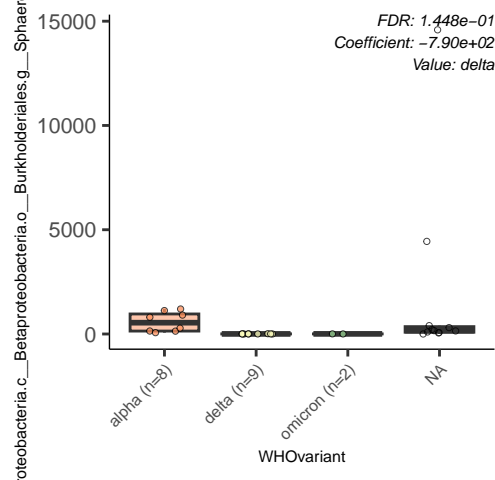

Betaproteobacteria.o\_\_Burkholderiales.f\_\_Comamonadaceae.g

FDR:  $1.498e-01$   
Coefficient:  $-3.89e+02$   
Value: delta

6000

4000

2000

0

alpha (n=8)

delta (n=9)

omicron (n=2)

NA

WHOvariant

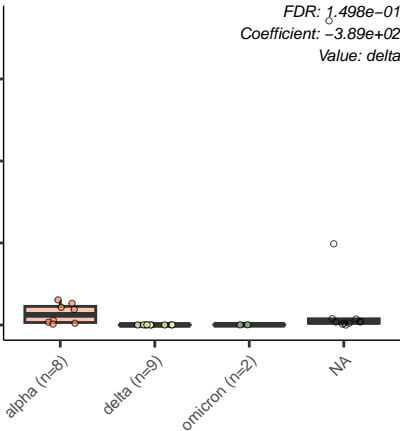



\_\_Bacteria.p\_\_Proteobacteria.c\_\_Betaproteobacteria.o\_\_Burkholder

FDR:  $1.515e-01$   
Coefficient:  $-4.62e+02$   
Value: delta

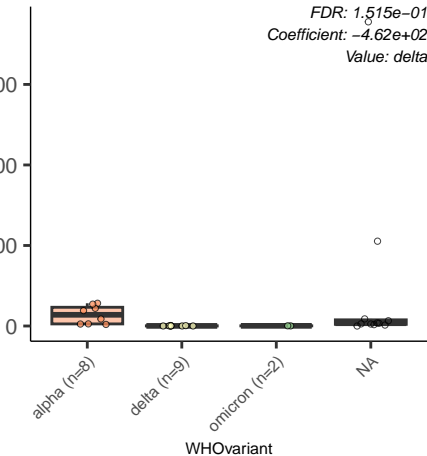

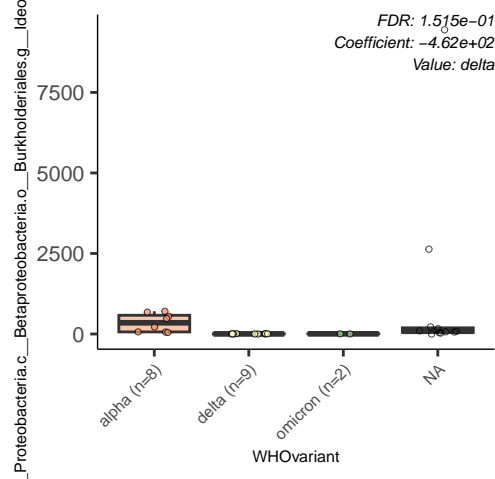

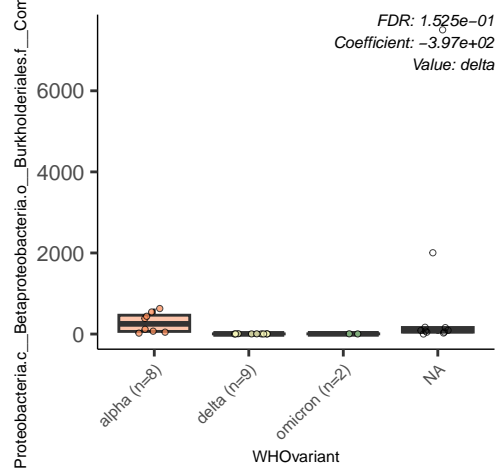

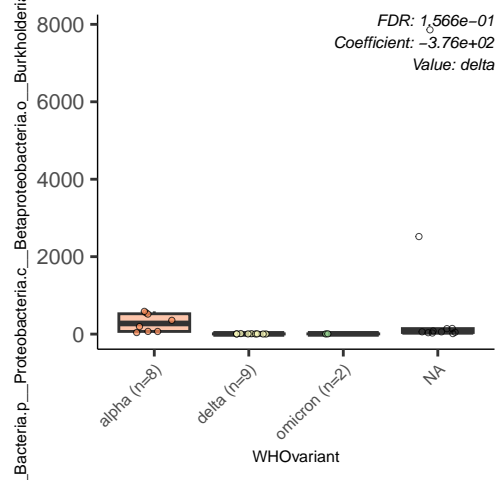

Proteobacteria.c\_\_Betaproteobacteria.o\_\_Burkholderiales.f\_\_Alca

FDR: 1.568e-01  
Coefficient: -5.27e+02  
Value: delta

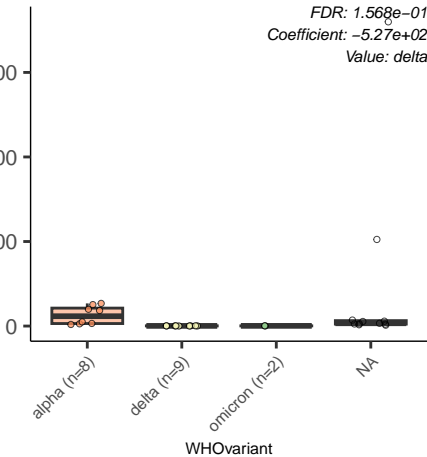

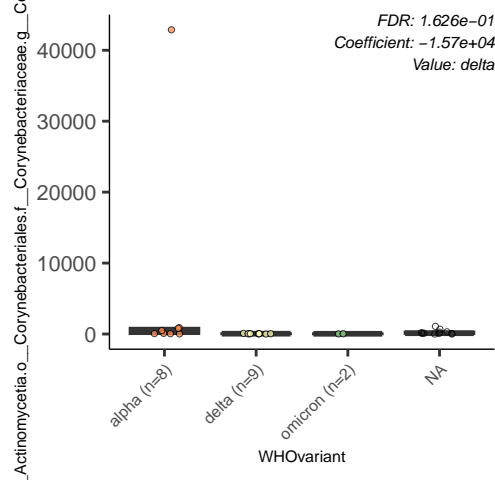

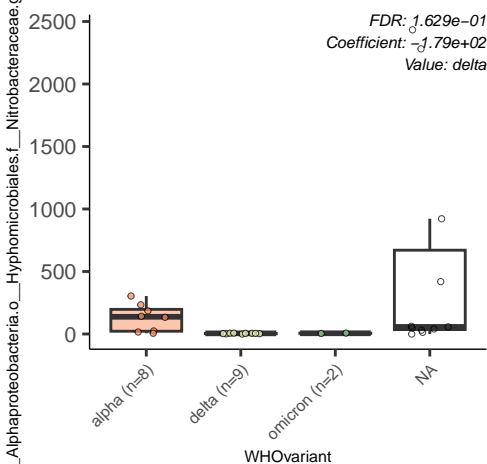

Actinomycetia.o\_\_Corynebacteriales.f\_\_Corynebacteriaceae.g

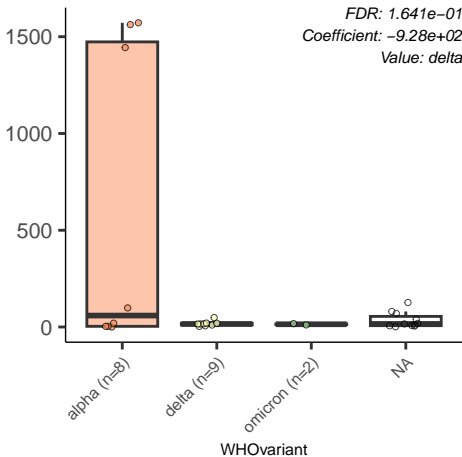



d\_Bacteria.p\_Actinobacteria.c\_Actinomycetia.o\_Coryneb

FDR: 1.715e-01  
Coefficient: -1.45e+05  
Value: omicron

2e+05  
1e+05  
0e+00

alpha (n=8)

delta (n=9)

omicron (n=2)

NA

WHOvariant

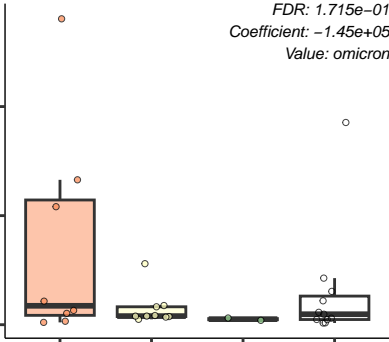

Bacteria.p\_\_Firmicutes.c\_\_Clostridia.o\_\_Eubacteriales.f\_\_Clostridia

FDR:  $1.760e-01$   
Coefficient:  $-5.03e+02$   
Value: delta

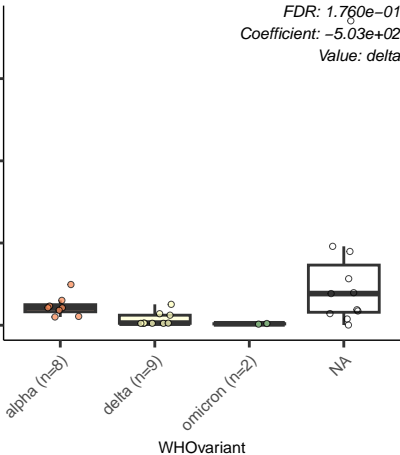

Firmicutes.c\_\_Clostridia.o\_\_Eubacteriales.f\_\_Clostridiaceae.g\_\_Hat

FDR:  $1.760e-01$   
Coefficient:  $-5.03e+02$   
Value: delta

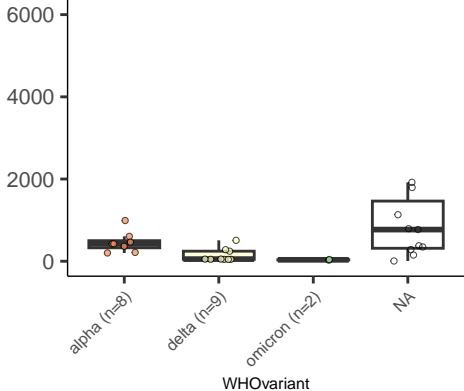

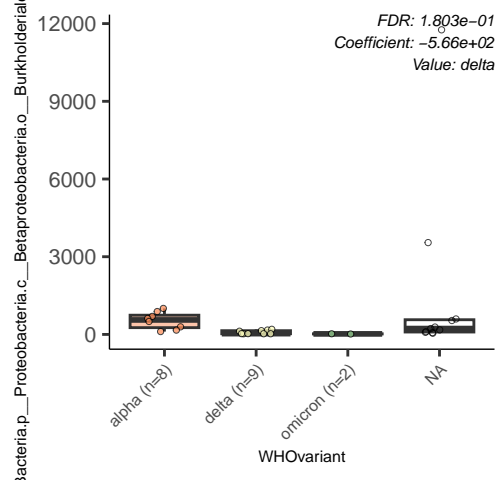

FDR: 1.824e-01  
Coefficient: -3.27e+03  
Value: omicron

acteria.p\_\_Actinobacteria.c\_\_Actinomycetia.o\_\_Corynebacteriales.f\_\_

FDR: 1.855e-01  
Coefficient: -1.43e+05  
Value: omicron

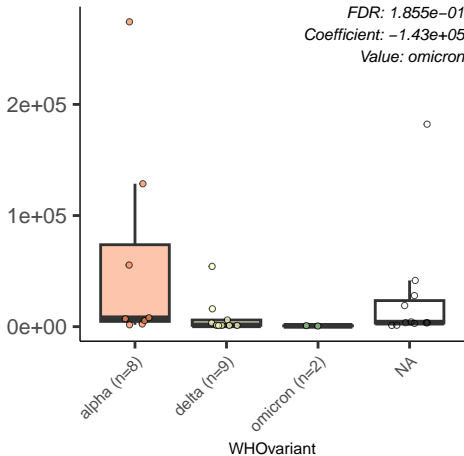

0e+00

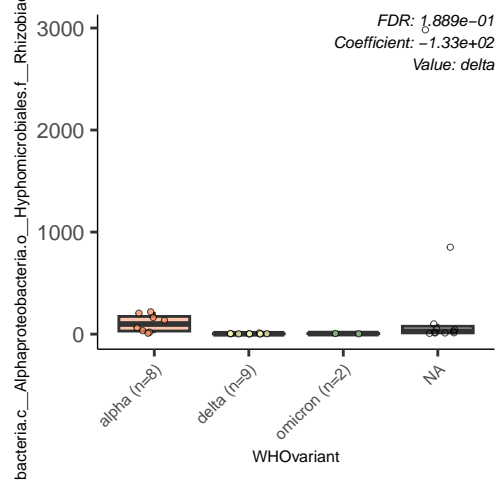



mmaproteobacteria.o\_\_Xanthomonadales.f\_\_Xanthomonadaceae.g

FDR:  $1.985e-01$   
Coefficient:  $-7.51e+04$   
Value: delta

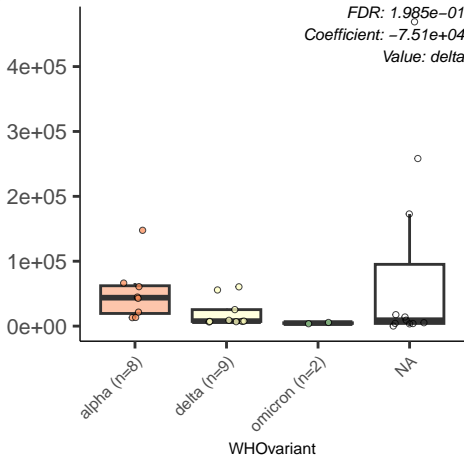

obacteria.c\_\_Gammaproteobacteria.o\_\_Xanthomonadales.f\_\_Xanth

*FDR: 1.986e-01*  
*Coefficient: -7.51e+04*  
*Value: delta*

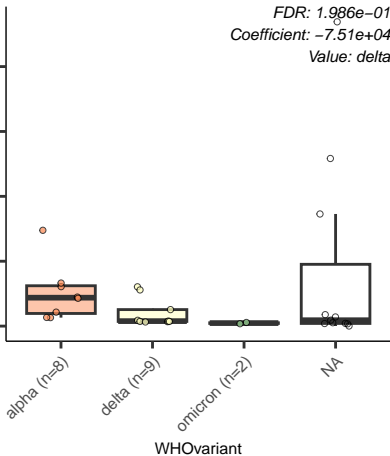

ia.p\_\_Proteobacteria.c\_\_Gammaproteobacteria.o\_\_Xanthomonada

FDR:  $2.000e-01$   
Coefficient:  $-7.51e+04$   
Value: delta

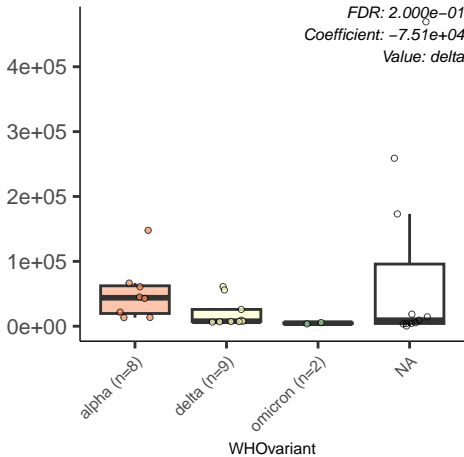

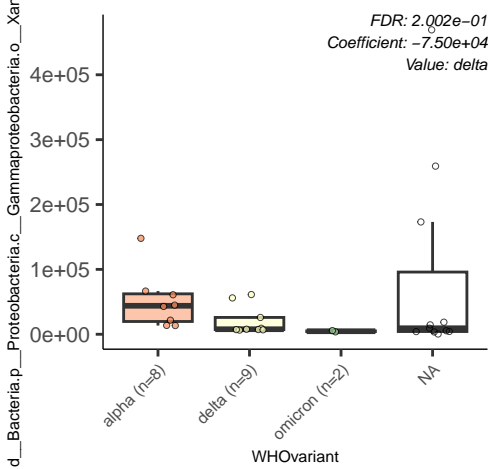

psilonproteobacteria.o\_\_Campylobacterales.f\_\_Campylobacteraceae

FDR:  $2.018e-01$   
Coefficient:  $5.10e+00$   
Value: delta

2000

1000

0

alpha (n=8)

delta (n=9)

omicron (n=2)

NA

WHOvariant

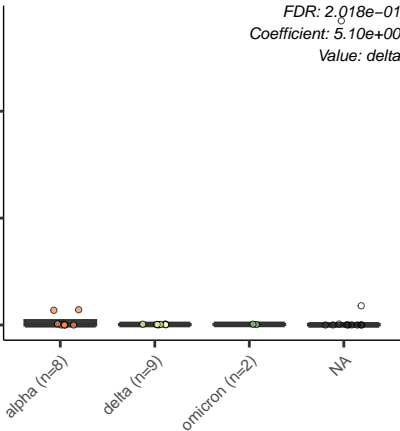

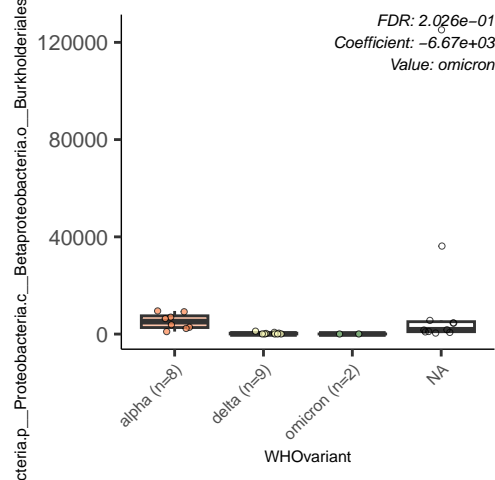

eria.c\_\_Betaproteobacteria.o\_\_Burkholderiales.f\_\_Alcaligenaceae.g

FDR: 2.050e-01  
Coefficient: -5.09e+02  
Value: delta

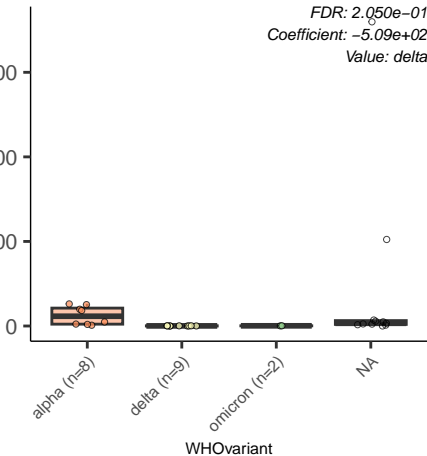

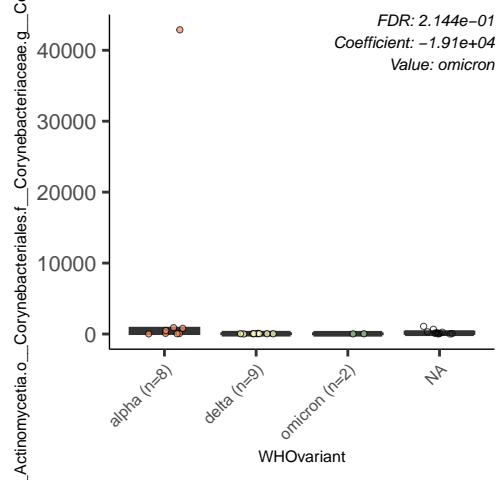



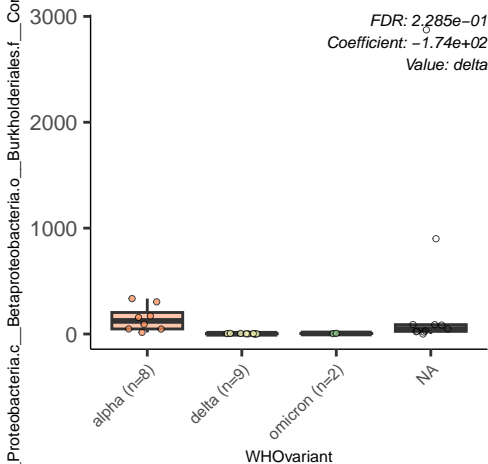

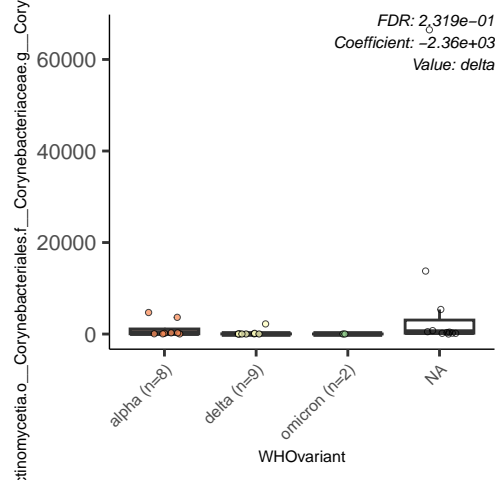

Bacteria.p\_\_Firmicutes.c\_\_Clostridia.o\_\_Eubacteriales.f\_\_Clostridia

FDR:  $2.339e-01$   
Coefficient:  $-6.04e+02$   
Value: omicron

6000

4000

2000

0

alpha (n=8)

delta (n=9)

omicron (n=2)

NA

WHOvariant

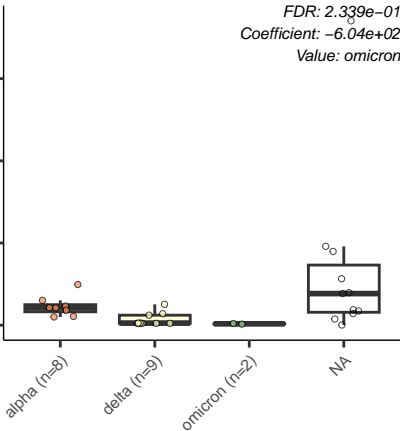

Firmicutes.c\_\_Clostridia.o\_\_Eubacteriales.f\_\_Clostridiaceae.g\_\_Hat

FDR: 2.339e-01  
Coefficient: -6.04e+02  
Value: omicron

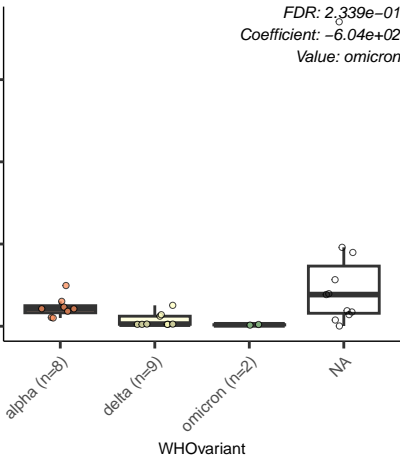

obacteria.c\_\_Betaproteobacteria.o\_\_Burkholderiales.f\_\_Comamonad

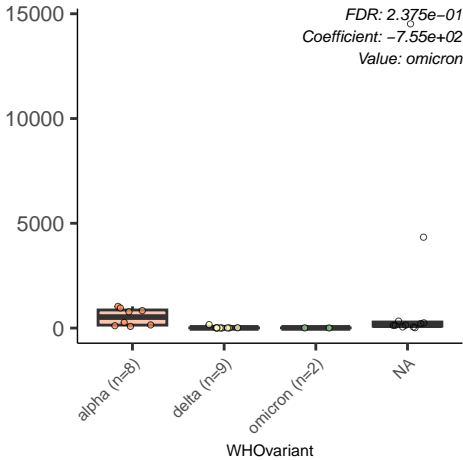

proteobacteria.o\_\_Burkholderiales.f\_\_Comamonadaceae.g\_\_Candidatus

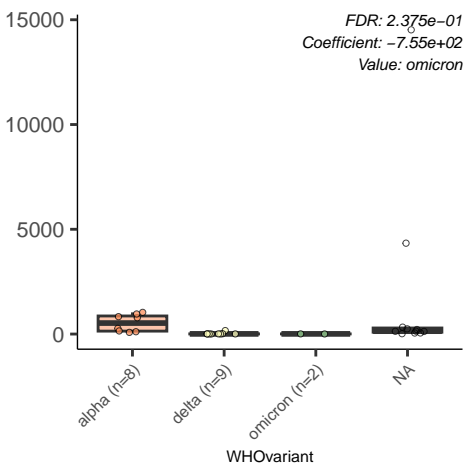

acteria.c\_\_Betaproteobacteria.o\_\_Burkholderiales.f\_\_Comamonadac

FDR:  $2.431e-01$   
Coefficient:  $-1.65e+02$   
Value: delta

2000

1000

0

alpha (n=8)

delta (n=9)

omicron (n=2)

NA

WHOvariant

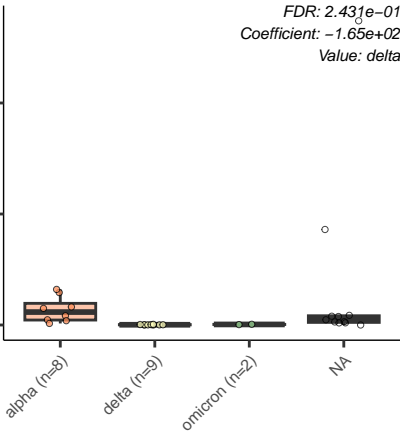

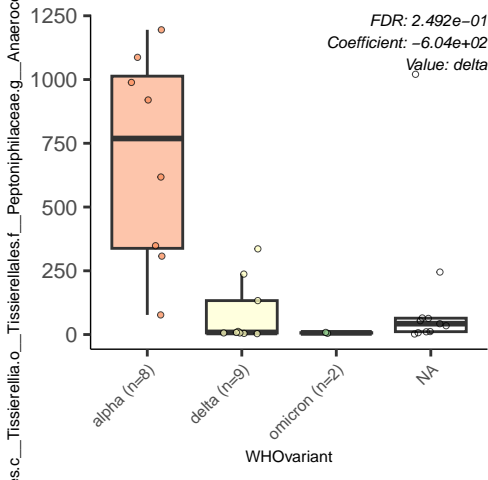

Supplement: s1 [file s1]
