# Supplementary material for: Metatranscriptome Analysis of Nasopharyngeal Swabs across the Varying Severity of COVID-19 Disease Demonstrated Unprecedented Species Diversity
Source: MDPI journal article supplement (doi:10.3390/microorganisms11071804), 2023-07-14

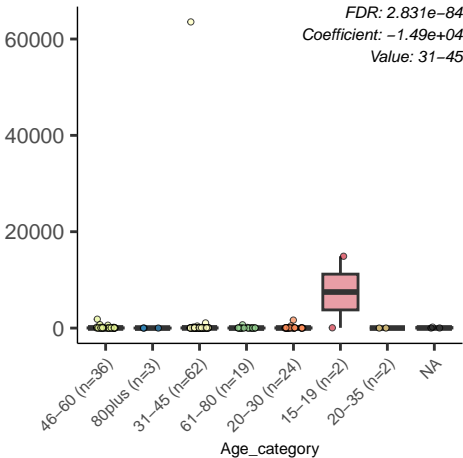

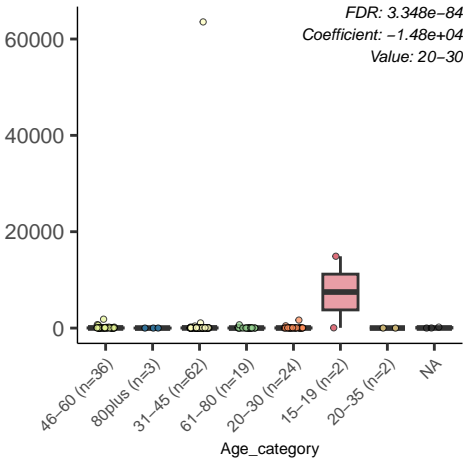

teobacteria.c\_\_Betaproteobacteria.o\_\_Neisseriales.f\_\_Neisseriaceae

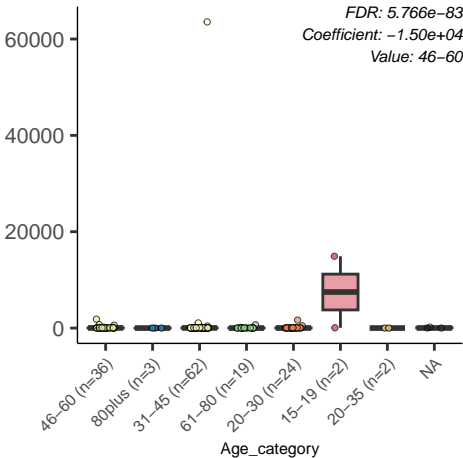

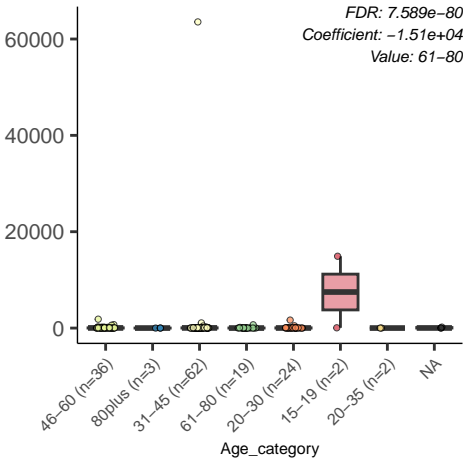

teobacteria.c\_\_Betaproteobacteria.o\_\_Neisseriales.f\_\_Neisseriaceae

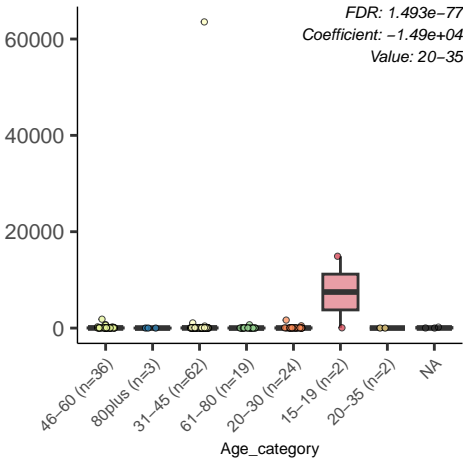

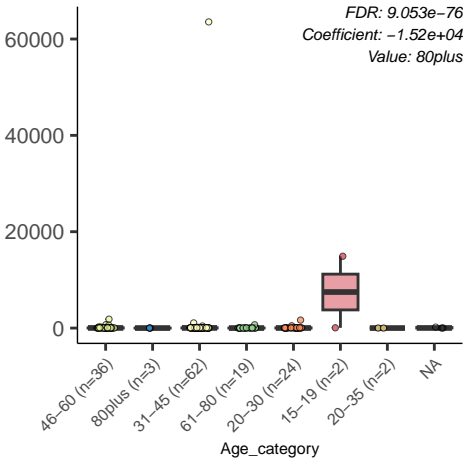

.p\_\_Proteobacteria.c\_\_Betaproteobacteria.o\_\_Neisseriales.f\_\_Neis

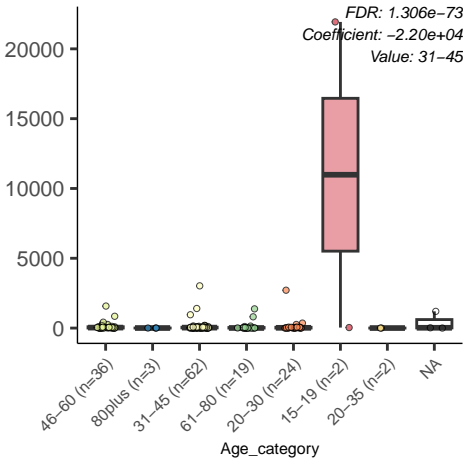

bacteria.c\_\_Betaproteobacteria.o\_\_Neisseriales.f\_\_Neisseriaceae.g

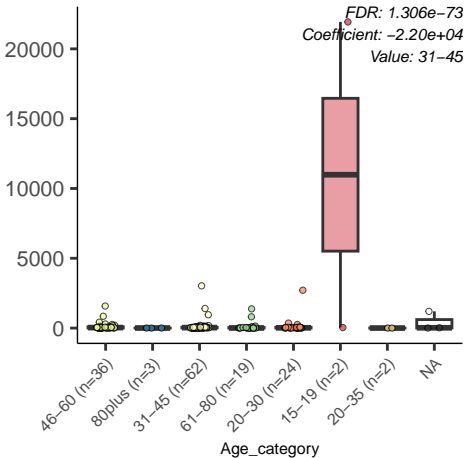



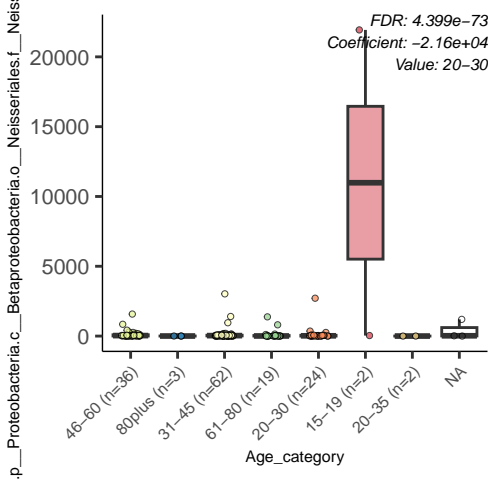

bacteria.c\_\_Betaproteobacteria.o\_\_Neisseriales.f\_\_Neisseriaceae.g

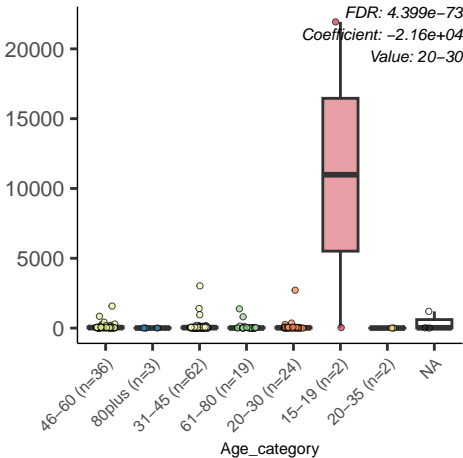

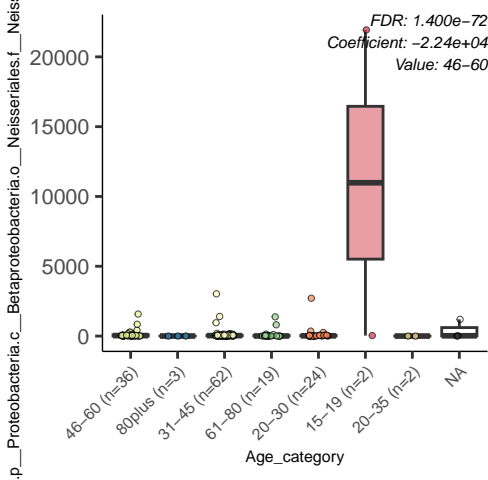

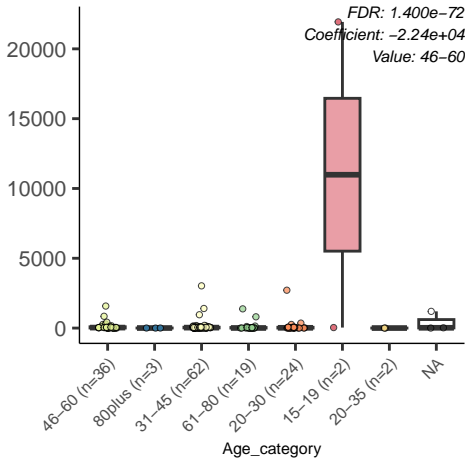

.p\_\_Proteobacteria.c\_\_Betaproteobacteria.o\_\_Neisseriales.f\_\_Neis

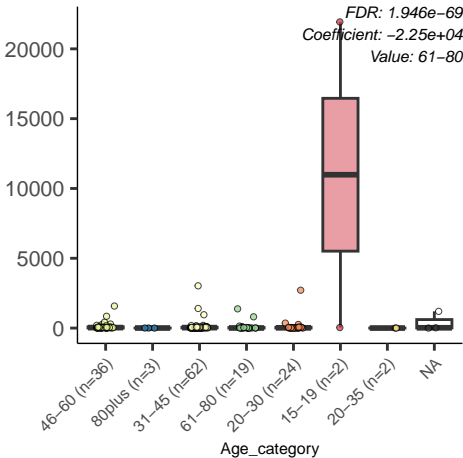

bacteria.c\_\_Betaproteobacteria.o\_\_Neisseriales.f\_\_Neisseriaceae.g

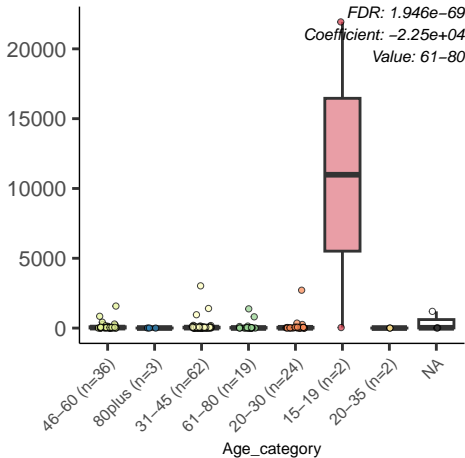

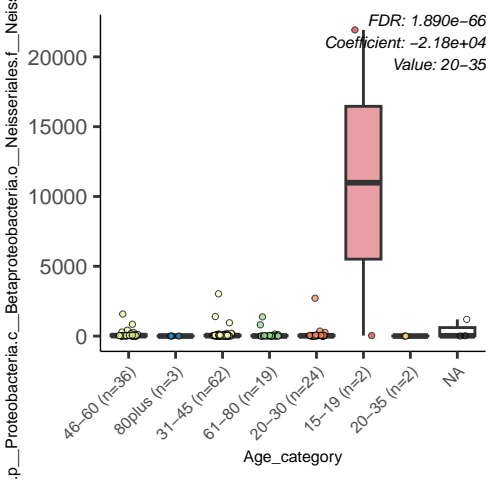

bacteria.c\_\_Betaproteobacteria.o\_\_Neisseriales.f\_\_Neisseriaceae.g

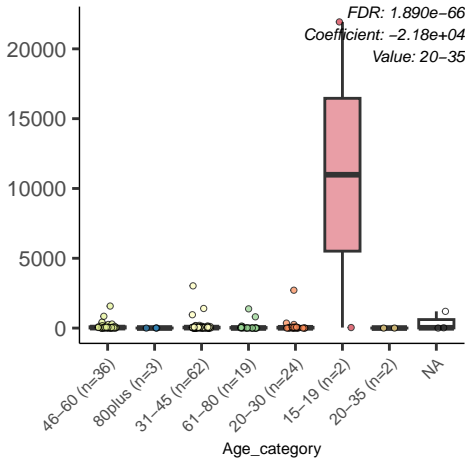



p\_\_Proteobacteria.c\_\_Betaproteobacteria.o\_\_Neisseriales.f\_\_Neis

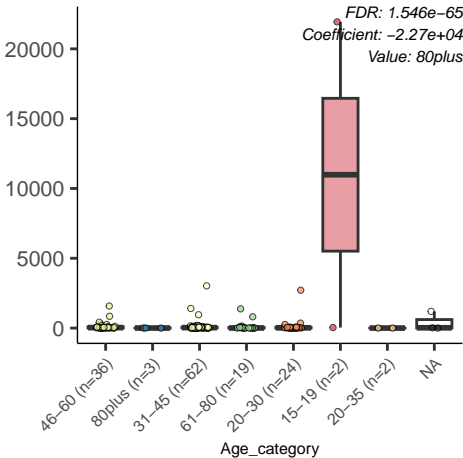

bacteria.c\_\_Betaproteobacteria.o\_\_Neisseriales.f\_\_Neisseriaceae.g

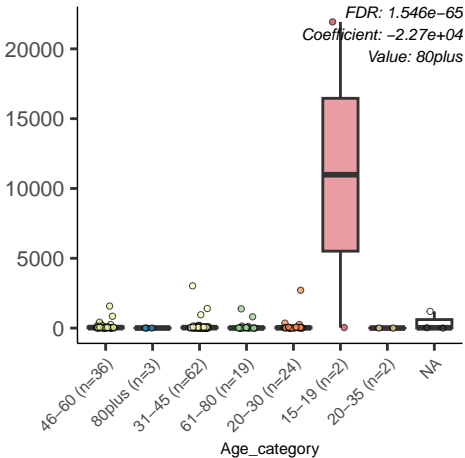

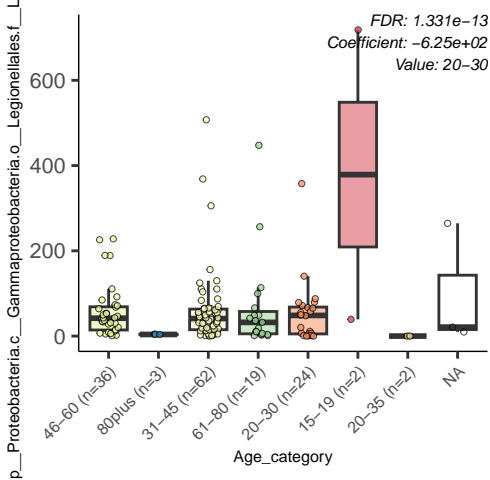

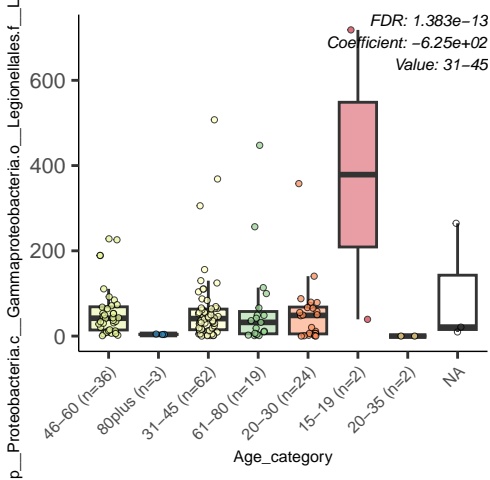

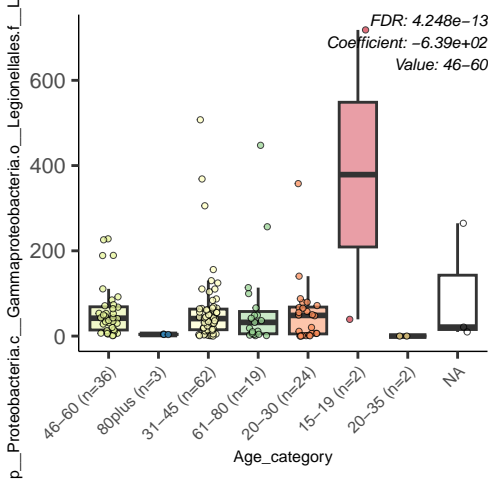

acteria.p\_\_Proteobacteria.c\_\_Gammaproteobacteria.o\_\_Legionella

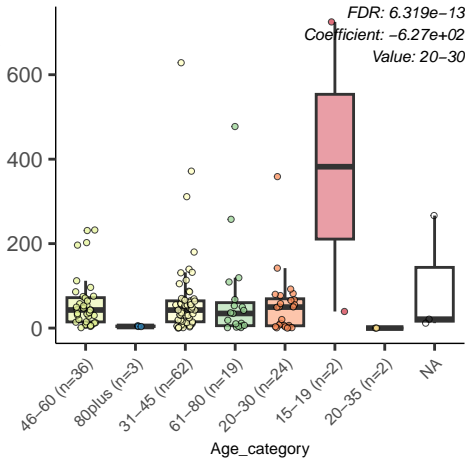

acteria.p\_\_Proteobacteria.c\_\_Gammaproteobacteria.o\_\_Legionella

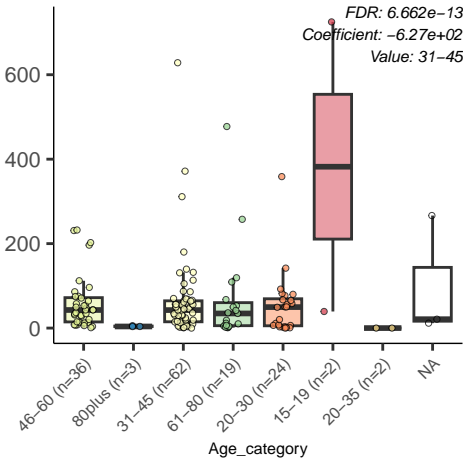

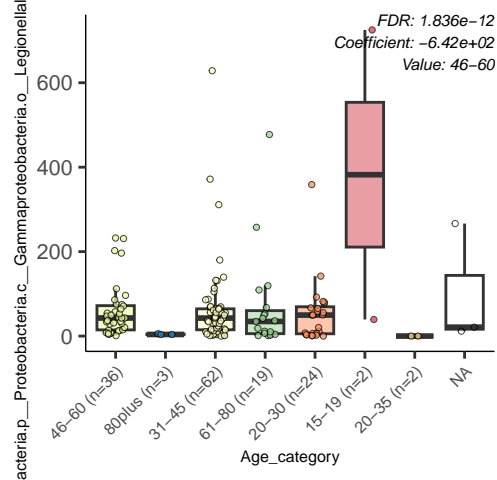



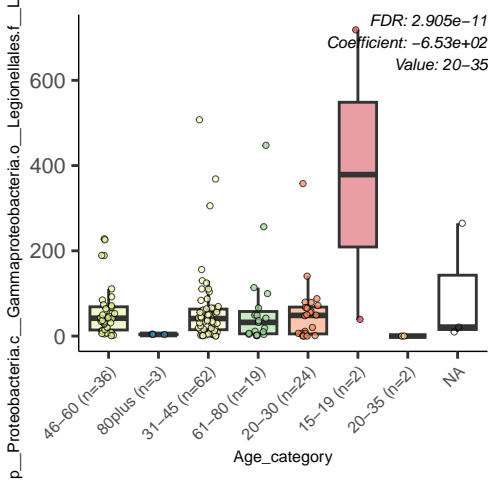

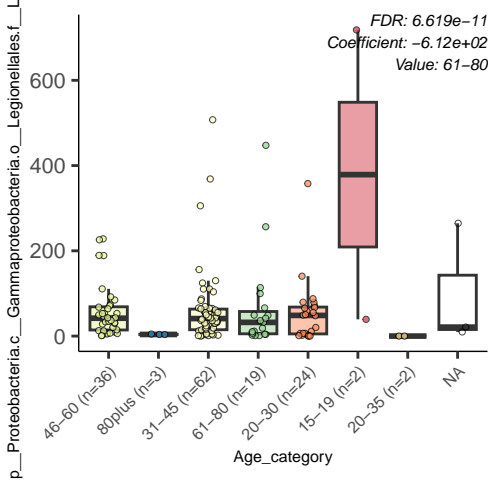

acteria.p\_\_Proteobacteria.c\_\_Gammaproteobacteria.o\_\_Legionella

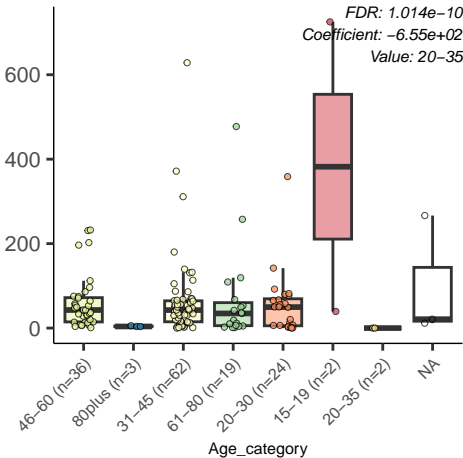

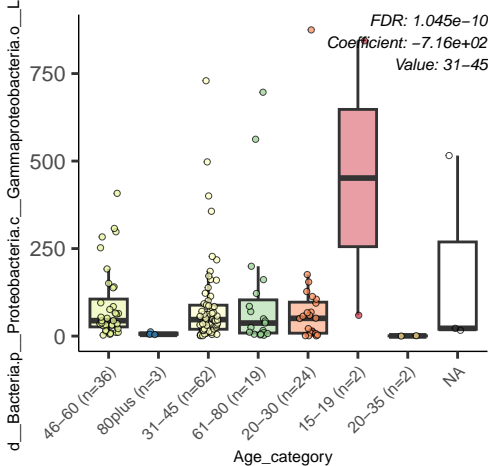

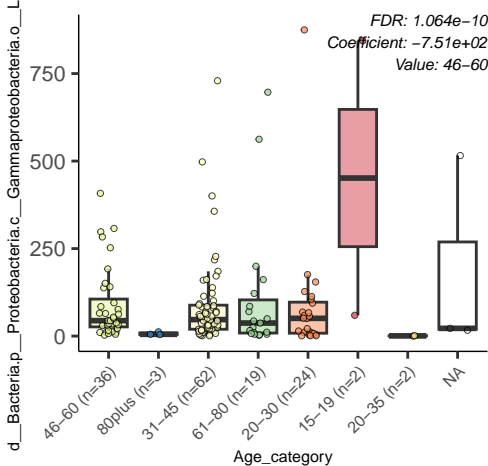

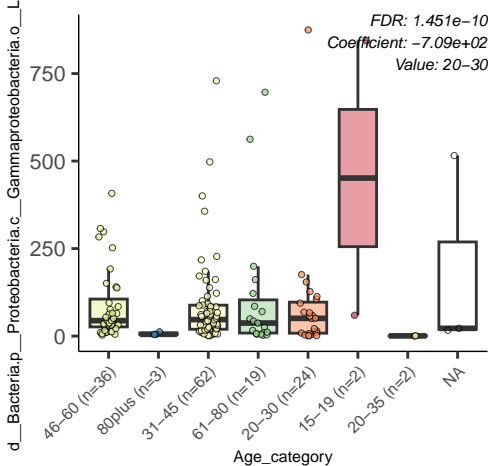

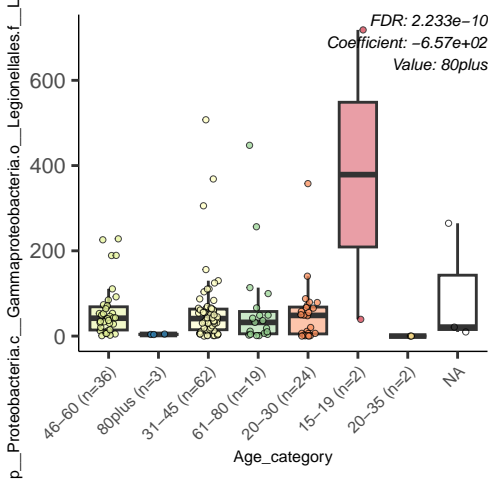

acteria.p\_\_Proteobacteria.c\_\_Gammaproteobacteria.o\_\_Legionella

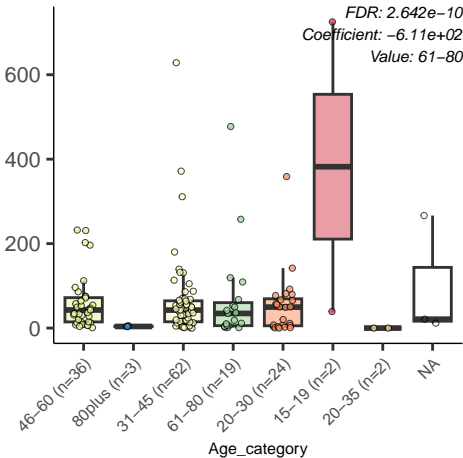



acteria.p\_\_Proteobacteria.c\_\_Gammaproteobacteria.o\_\_Legionella

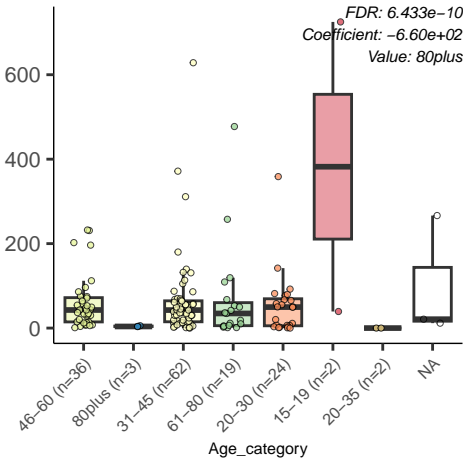

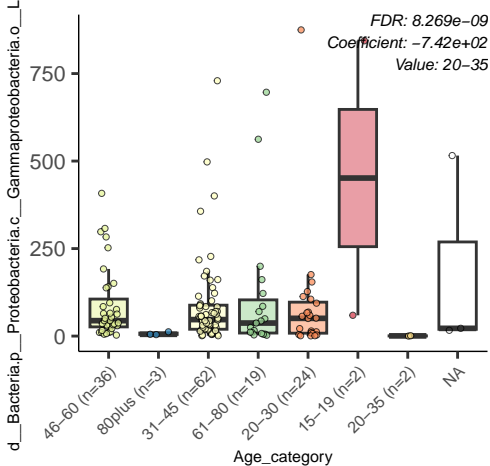

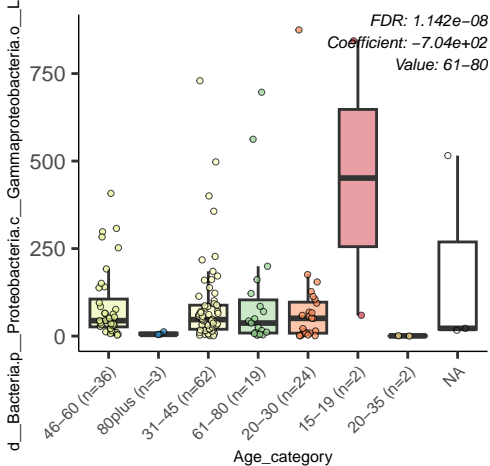

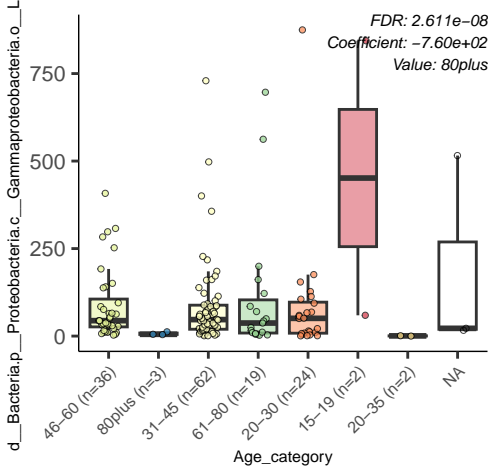

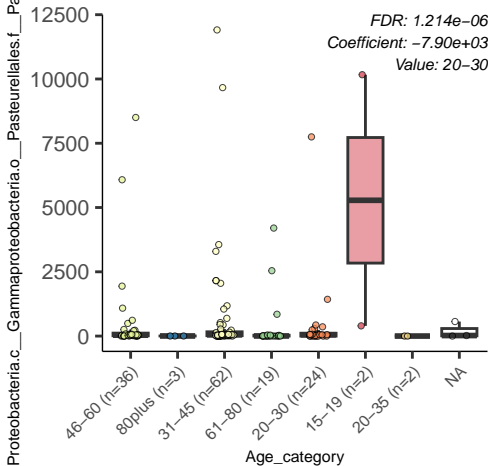

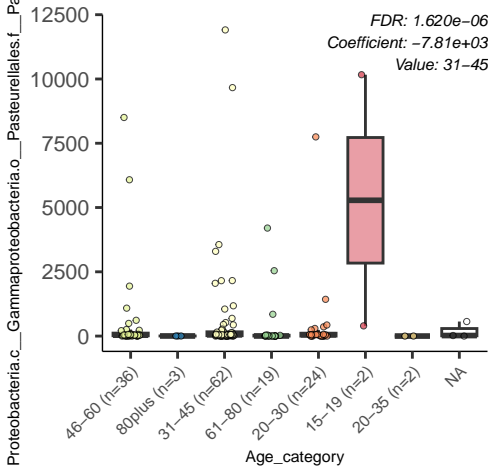

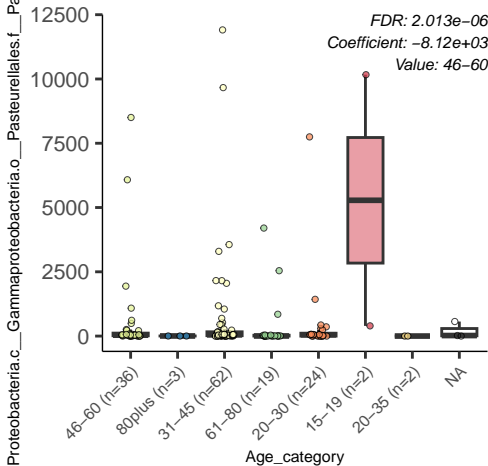

Actinomycetia.o\_\_Corynebacteriales.f\_\_Corynebacteriaceae.g\_\_C

FDR: 3.629e-06  
Coefficient: 2.28e+04  
Value: 80plus

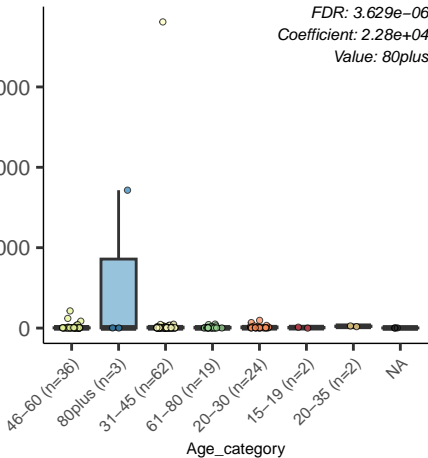



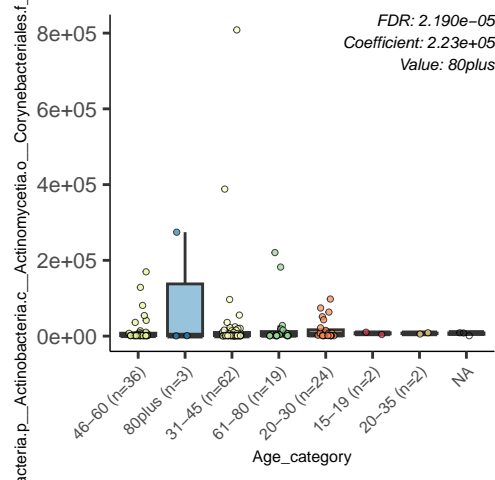

Actinobacteria.c\_\_Actinomycetia.o\_\_Corynebacteriales.f\_\_Coryneb

FDR: 2.190e-05  
Coefficient: 2.23e+05  
Value: 80plus

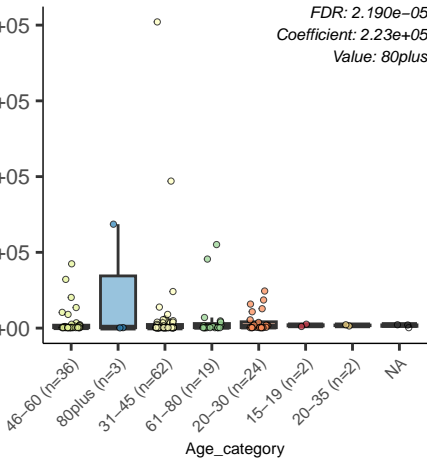

d\_\_Bacteria.p\_Actinobacteria.c\_Actinomycetia.o\_Coryneb

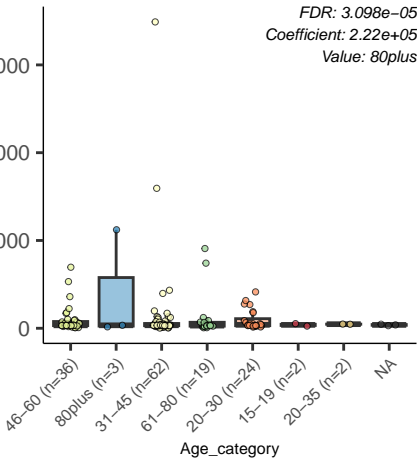

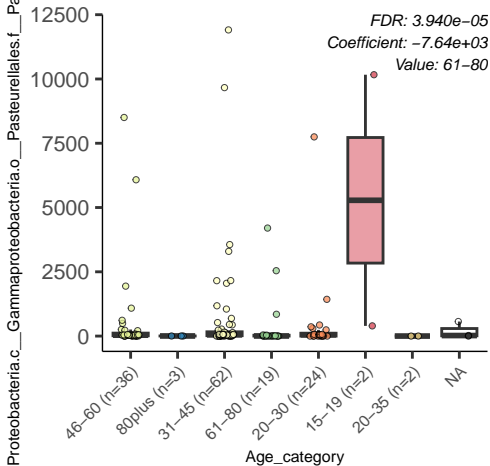

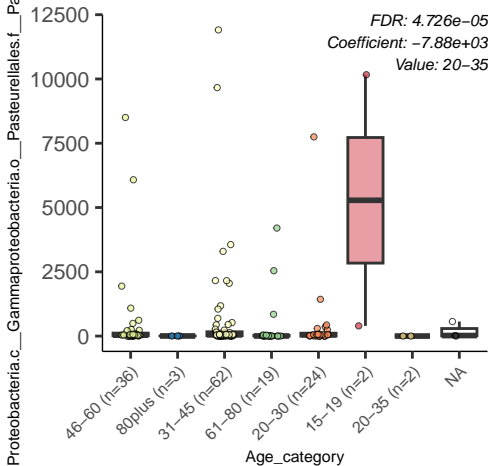

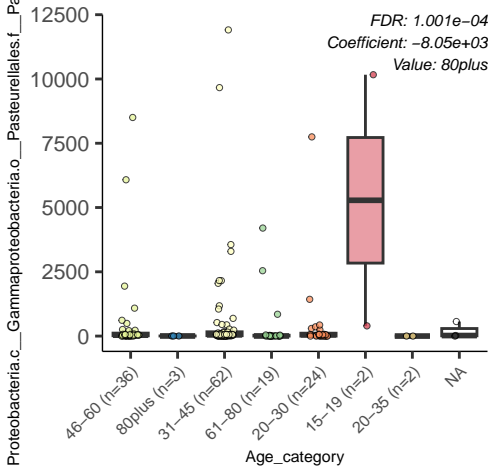

bacteria.c\_\_Betaproteobacteria.o\_\_Neisseriales.f\_\_Neisseriaceae.g

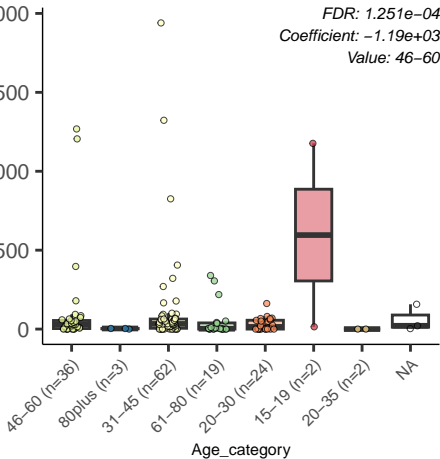

tinomycetia.o\_\_Corynebacteriales.f\_\_Corynebacteriaceae.g\_\_Cory

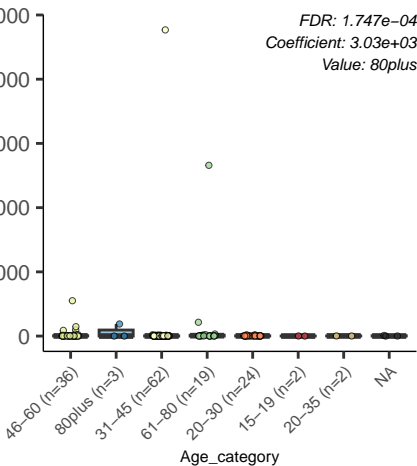



bacteria.c\_\_Betaproteobacteria.o\_\_Neisseriales.f\_\_Neisseriaceae.g

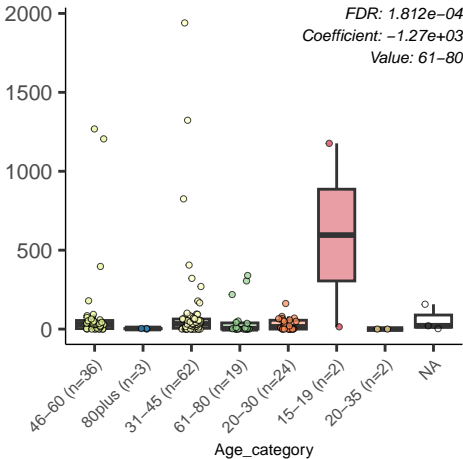

micutes.c\_\_Bacilli.o\_\_Lactobacillales.f\_\_Streptococcaceae.g\_\_Stre

FDR:  $2.788e-04$   
Coefficient:  $-5.26e+03$   
Value: 46-60

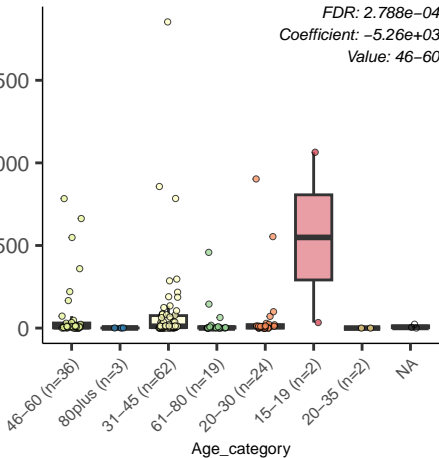

micutes.c\_\_Bacilli.o\_\_Lactobacillales.f\_\_Streptococcaceae.g\_\_Stre

*FDR: 3.239e-04*  
*Coefficient: -5.66e+03*  
*Value: 61-80*

7500  
5000  
2500  
0

46-60 (n=36)  
80plus (n=3)  
31-45 (n=62)  
61-80 (n=19)  
20-30 (n=24)  
15-19 (n=2)  
20-35 (n=2)  
NA

Age\_category

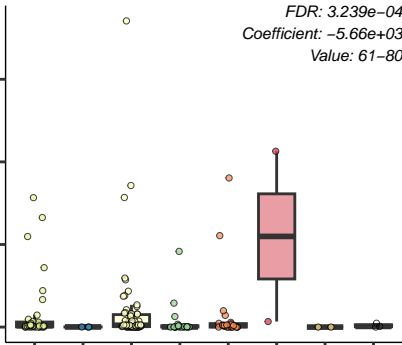

bacteria.c\_\_Betaproteobacteria.o\_\_Neisseriales.f\_\_Neisseriaceae.g

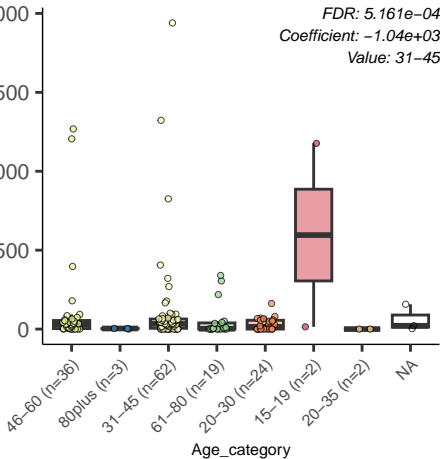

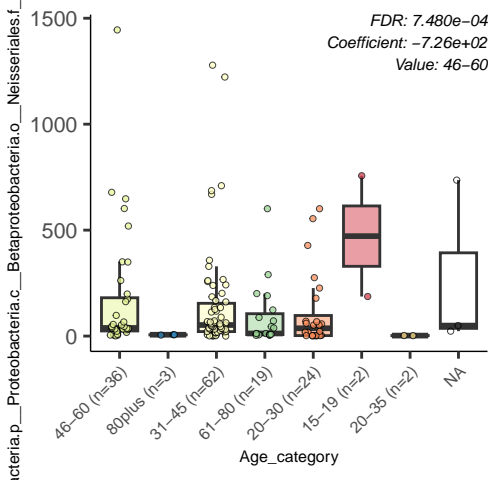

micutes.c\_\_Bacilli.o\_\_Lactobacillales.f\_\_Streptococcaceae.g\_\_Stre

*FDR: 8.069e-04*  
*Coefficient: -5.90e+03*  
*Value: 80plus*

7500  
5000  
2500  
0

46-60 (n=36)  
80plus (n=3)  
31-45 (n=62)  
61-80 (n=19)  
20-30 (n=24)  
15-19 (n=2)  
20-35 (n=2)  
NA

Age\_category

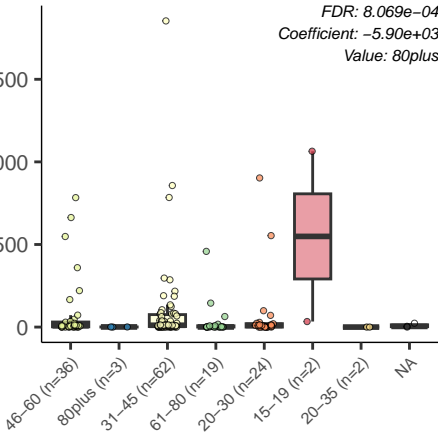

bacteria.c\_\_Betaproteobacteria.o\_\_Neisseriales.f\_\_Neisseriaceae.g

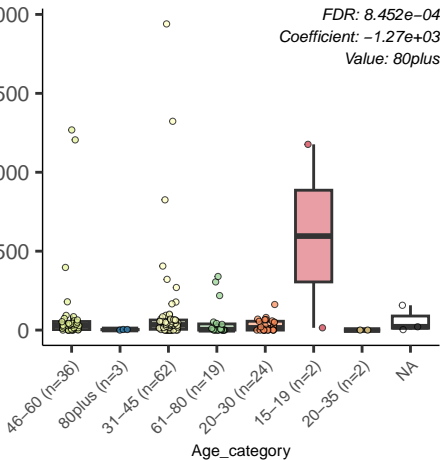

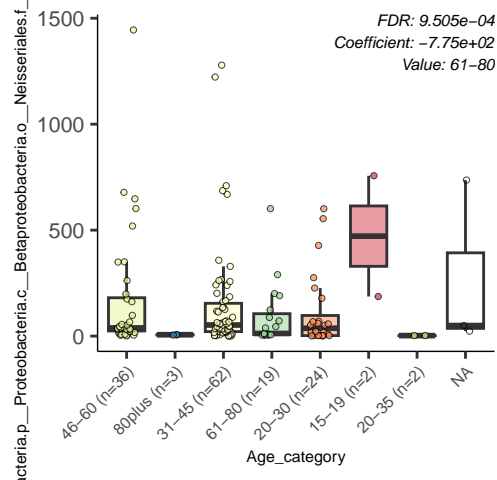



micutes.c\_\_Bacilli.o\_\_Lactobacillales.f\_\_Streptococcaceae.g\_\_Stre

FDR:  $1.047e-03$   
Coefficient:  $-4.57e+03$   
Value: 31-45

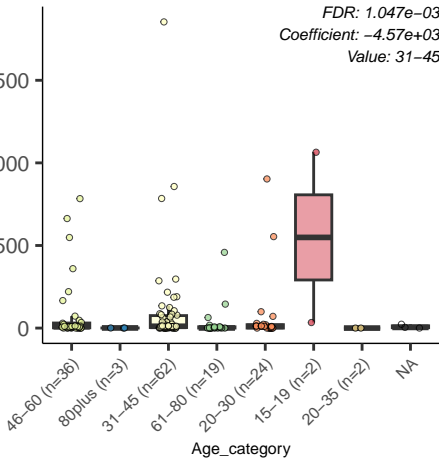

bacteria.c\_\_Betaproteobacteria.o\_\_Neisseriales.f\_\_Neisseriaceae.g

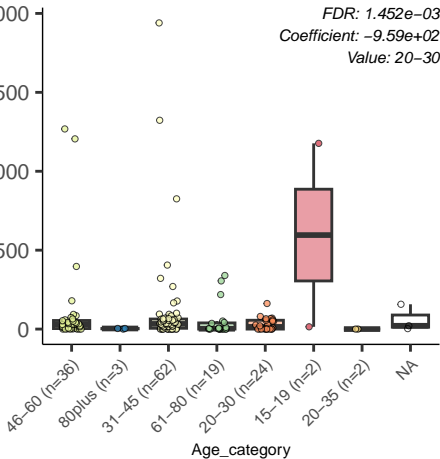

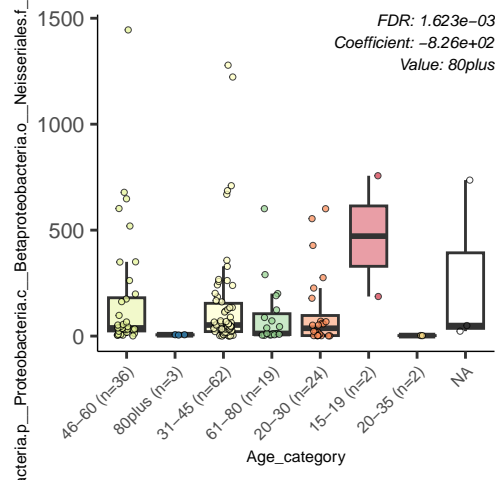

d\_\_Bacteria.p\_\_Actinobacteria.c\_\_Actinomycetia.o\_\_Coryneb

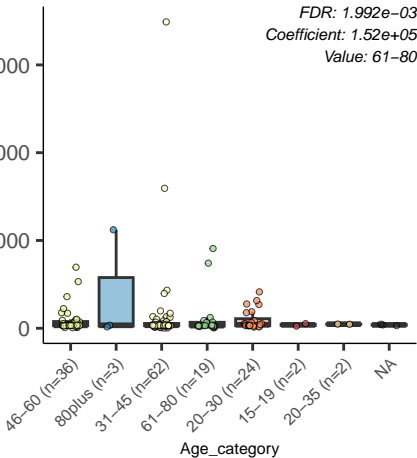

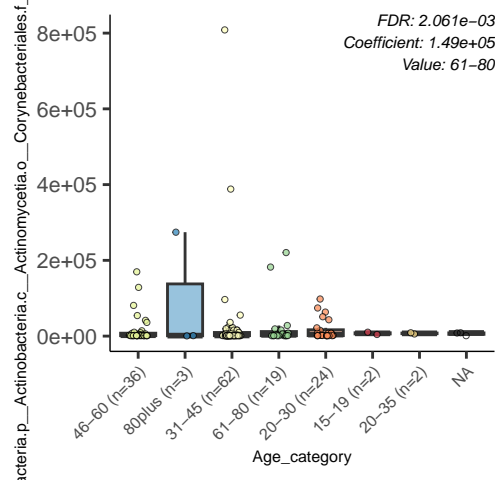

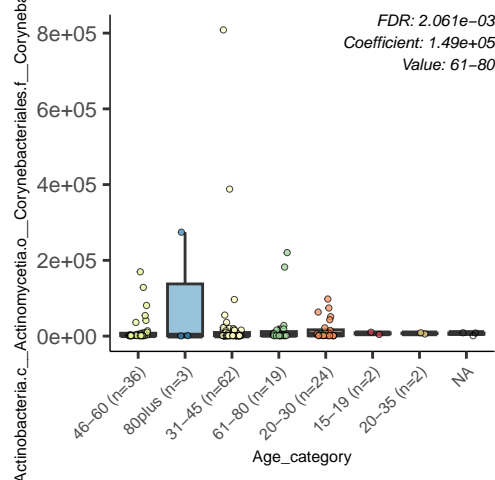

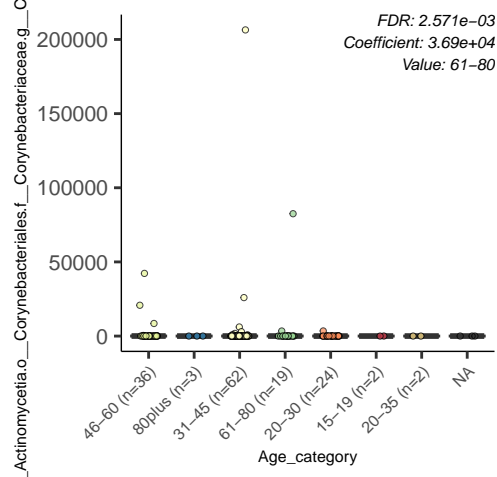

micutes.c\_\_Bacilli.o\_\_Lactobacillales.f\_\_Streptococcaceae.g\_\_Stre

*FDR: 3.765e-03*  
*Coefficient: -4.11e+03*  
*Value: 20-30*

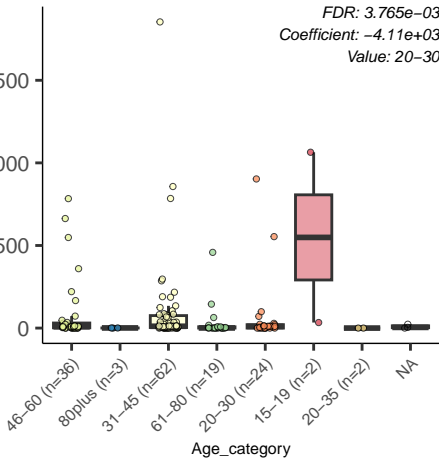



bacteria.p\_\_Proteobacteria.c\_\_Betaproteobacteria.o\_\_Neisseriales.f

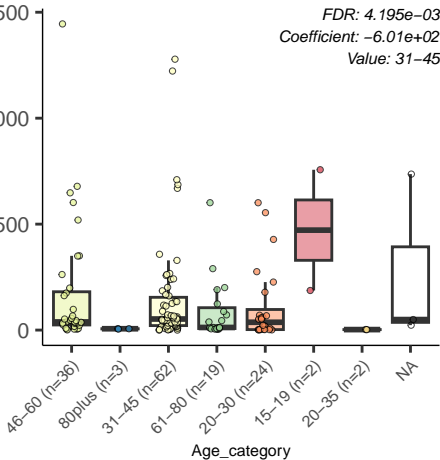

bacteria.c\_\_Betaproteobacteria.o\_\_Neisseriales.f\_\_Neisseriaceae.g

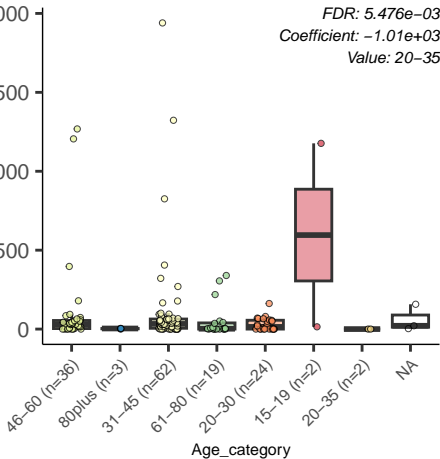

c\_\_Gammaproteobacteria.o\_\_Oceanospirillales.f\_\_Halomonadaceae

FDR:  $5.911\text{e-}03$   
Coefficient:  $-2.19\text{e+}04$   
Value: 20-30

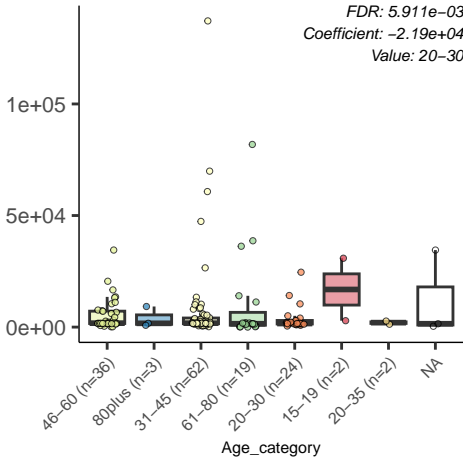

Proteobacteria.c\_\_Gammaproteobacteria.o\_\_Oceanospirillales.f\_\_F

*FDR: 5.976e-03*  
*Coefficient: -2.19e+04*  
*Value: 20-30*

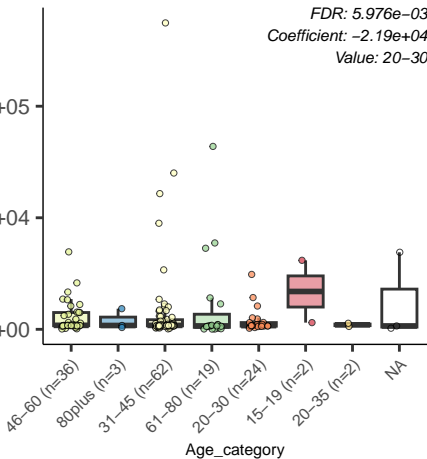

eria.p\_\_Proteobacteria.c\_\_Gammaproteobacteria.o\_\_Oceanospirilla

FDR:  $6.243e-03$   
Coefficient:  $-2.20e+04$   
Value: 20-30

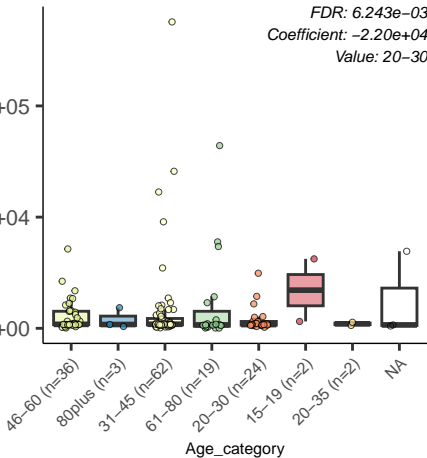

Gamma\_\_Gammaproteobacteria.o\_\_Cardiobacteriales.f\_\_Cardiobacteriaceae

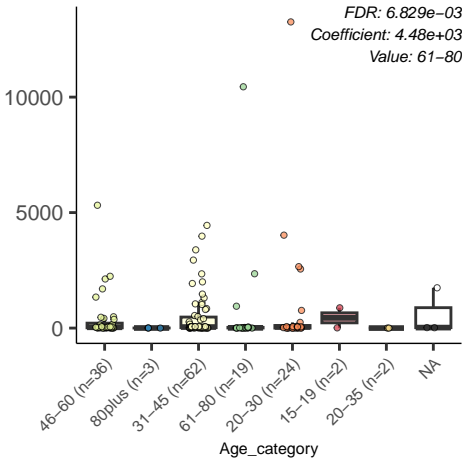

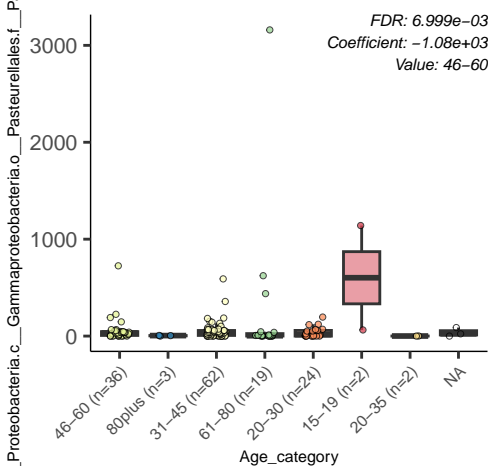

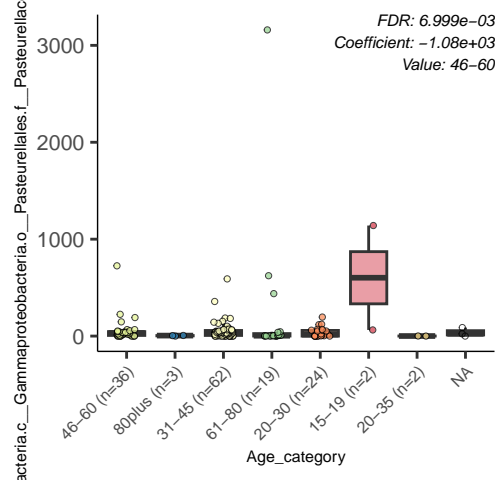



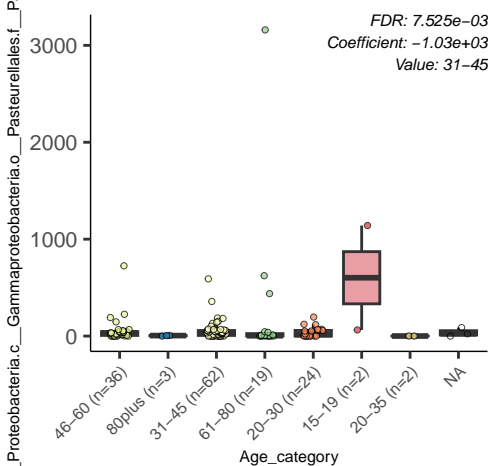

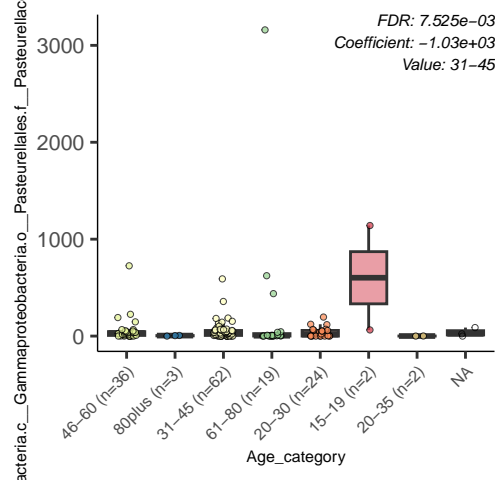

d\_\_Bacteria.p\_\_Proteobacteria.c\_\_Gammaproteobacteria.o\_\_Oscillatoriales

FDR:  $8.078e-03$   
Coefficient:  $-2.16e+04$   
Value: 20-30

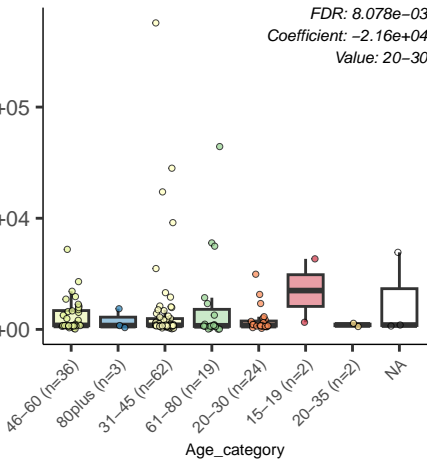

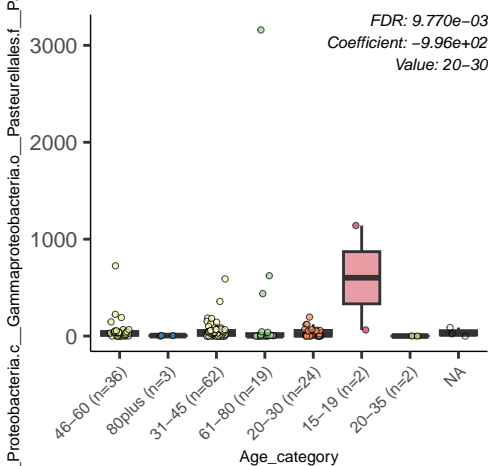

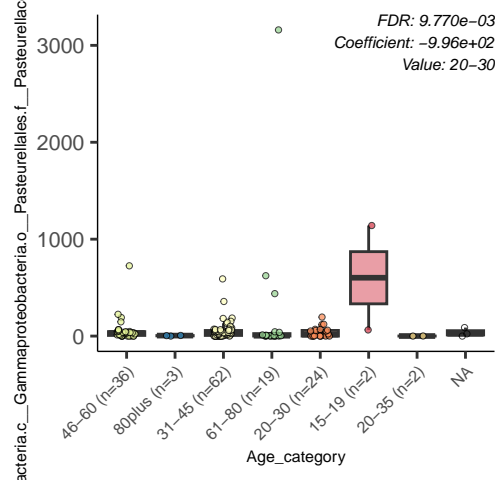

micutes.c\_\_Bacilli.o\_\_Lactobacillales.f\_\_Streptococcaceae.g\_\_Stre

FDR:  $1.042e-02$   
Coefficient:  $-4.41e+03$   
Value: 20-35

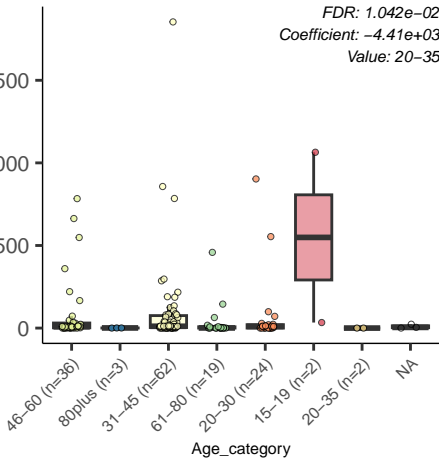

.c\_\_Actinomycetia.o\_\_Candidatus.Nanopelagiales.f\_\_Candidatus.

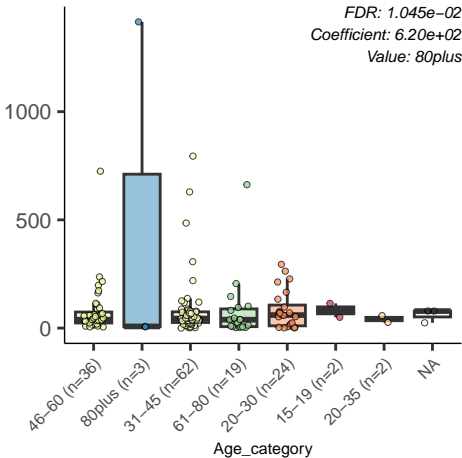

l\_Bacteria.p\_\_Proteobacteria.c\_\_Betaproteobacteria.o\_\_Burkholder

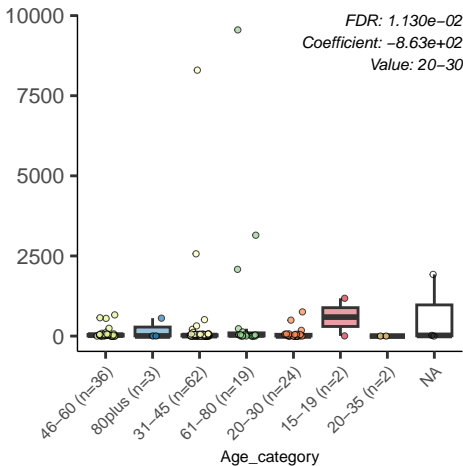



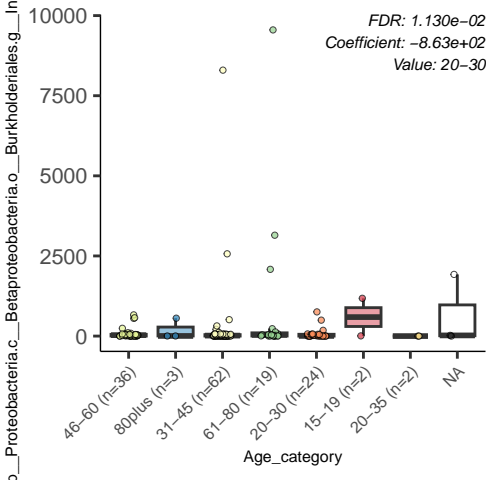

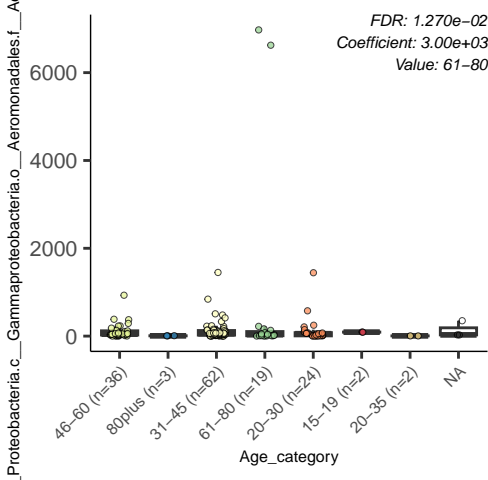

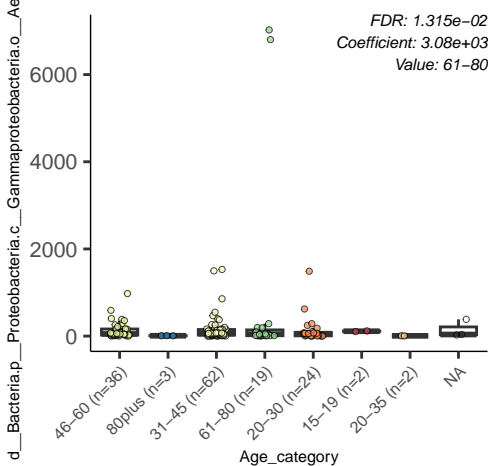

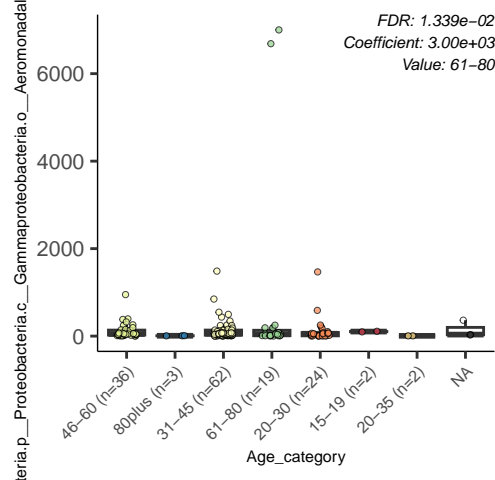

c\_\_Gammaproteobacteria.o\_\_Oceanospirillales.f\_\_Halomonadaceae

FDR:  $1.439\text{e-}02$   
Coefficient:  $-1.99\text{e+}04$   
Value: 31-45

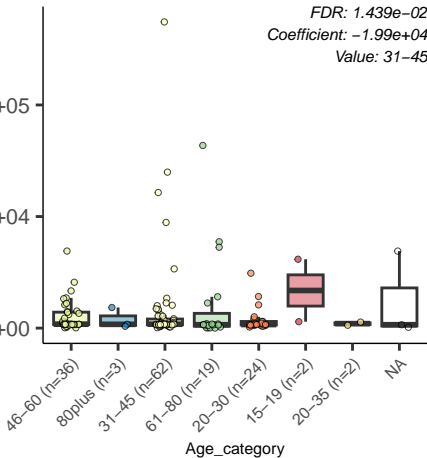

Epsilonproteobacteria.o\_\_Campylobacterales.f\_\_Campylobacteraceae

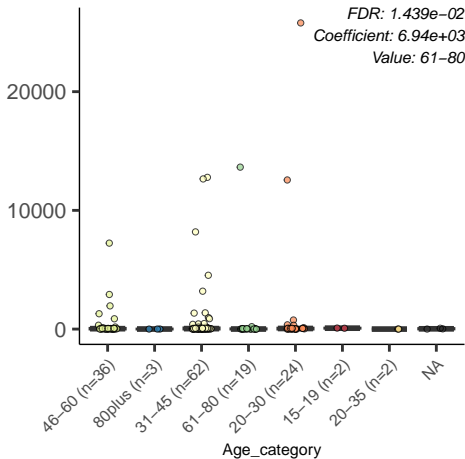

Proteobacteria.c\_\_Gammaproteobacteria.o\_\_Oceanospirillales.f\_\_F

FDR:  $1.448 \times 10^{-2}$   
Coefficient:  $-1.99 \times 10^4$   
Value: 31-45

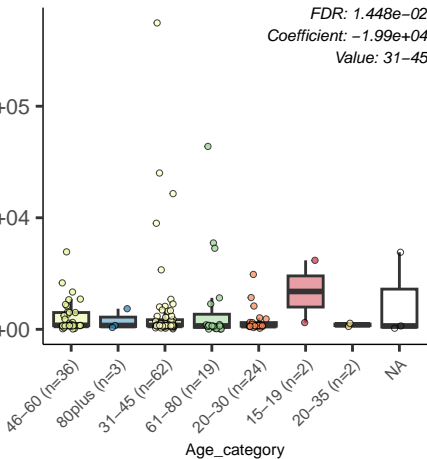

eria.p\_\_Proteobacteria.c\_\_Gammaproteobacteria.o\_\_Oceanospirilla

FDR:  $1.480e-02$   
Coefficient:  $-2.00e+04$   
Value: 31-45

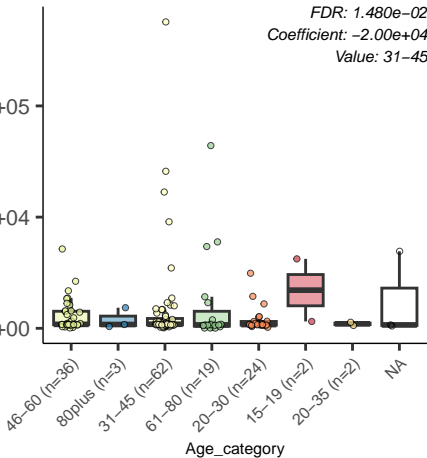



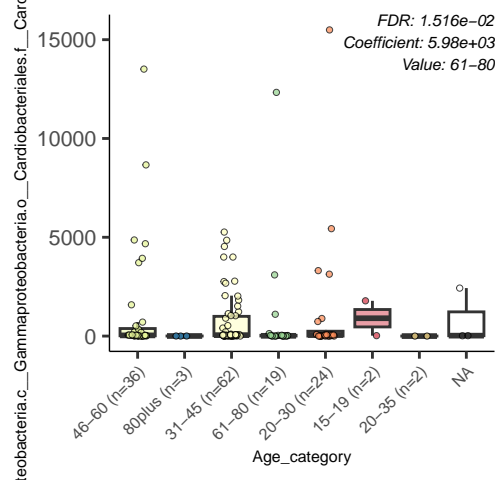

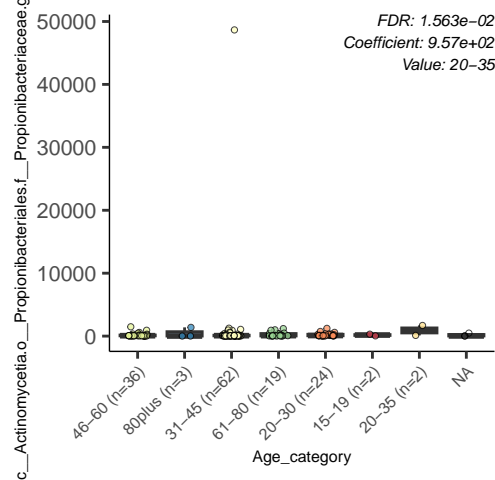

d\_Bacteria.p\_Actinobacteria.c\_Actinomycetia.o\_Candidatus.N

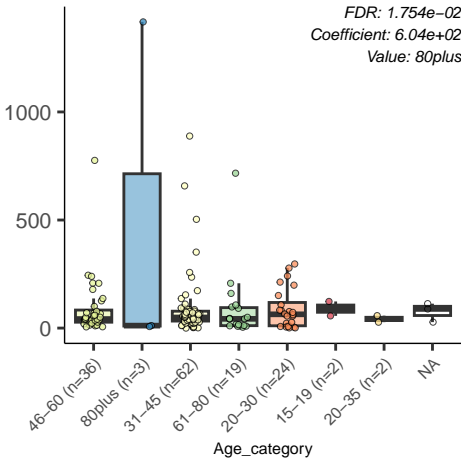

FDR:  $1.754e-02$   
Coefficient:  $6.04e+02$   
Value: 80plus

1000

500

0

46-60 (n=36)

80plus (n=3)

31-45 (n=62)

61-80 (n=19)

20-30 (n=24)

15-19 (n=2)

20-35 (n=2)

NA

Age\_category

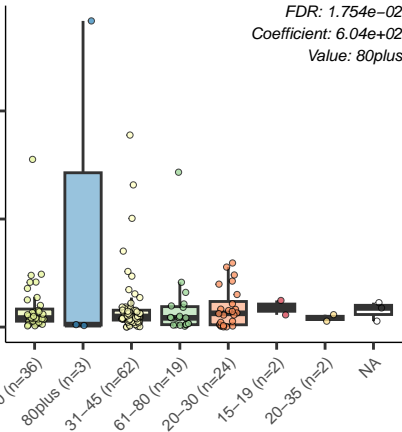

d\_\_Bacteria.p\_\_Proteobacteria.c\_\_Gammaproteobacteria.o\_\_Oscillatoriales

FDR:  $1.824e-02$   
Coefficient:  $-1.98e+04$   
Value: 31-45

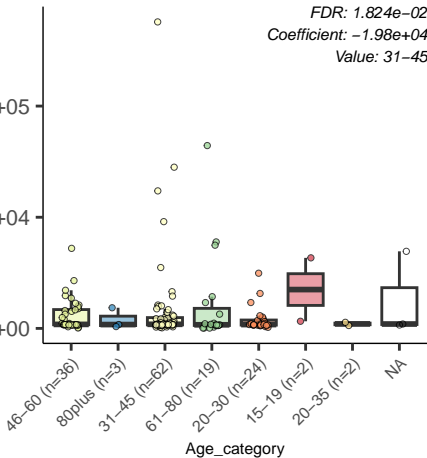

Actinomycetia.o\_\_Corynebacteriales.f\_\_Corynebacteriaceae.g

FDR: 1.897e-02  
Coefficient: 3.04e+03  
Value: 80plus

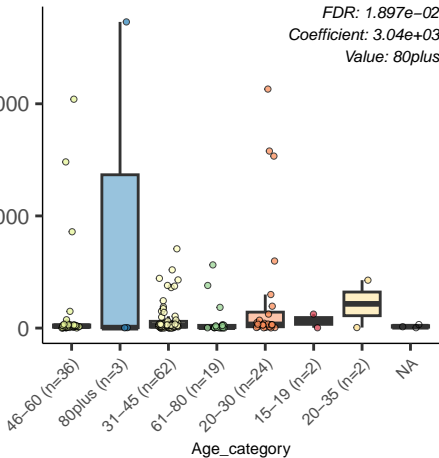

Firmicutes.c\_\_Clostridia.o\_\_Eubacteriales.f\_\_Clostridiaceae.g\_\_C

FDR: 1.997e-02  
Coefficient: -5.19e+03  
Value: 20-30

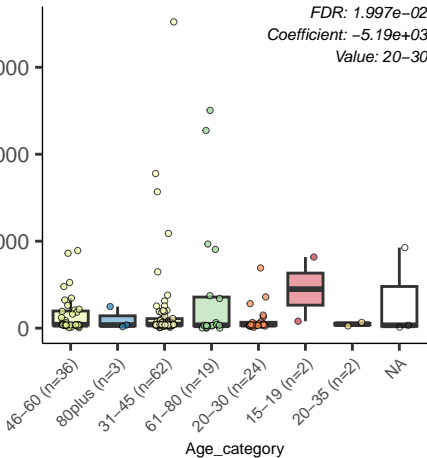

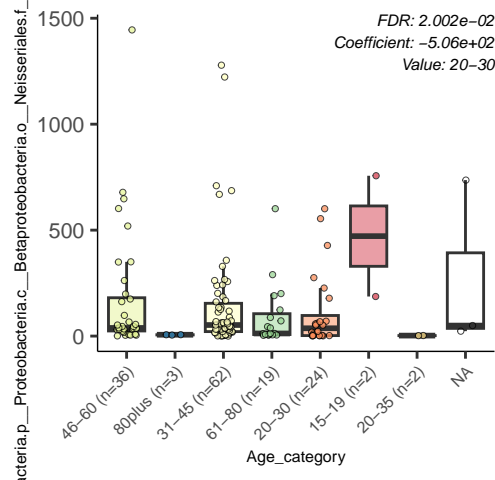





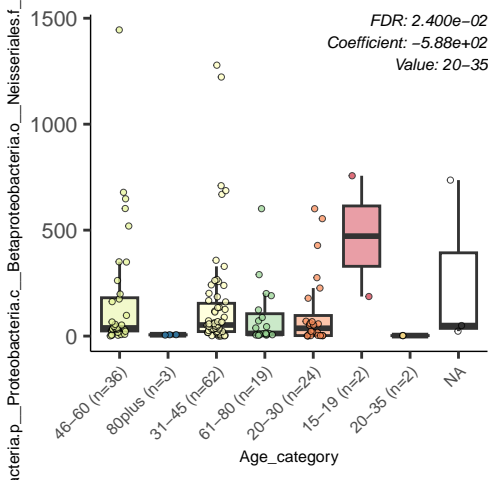

Proteobacteria.c\_\_Betaproteobacteria.o\_\_Burkholderiales.f\_\_Alcal

FDR: 2.898e-02  
Coefficient: -7.37e+02  
Value: 20-30

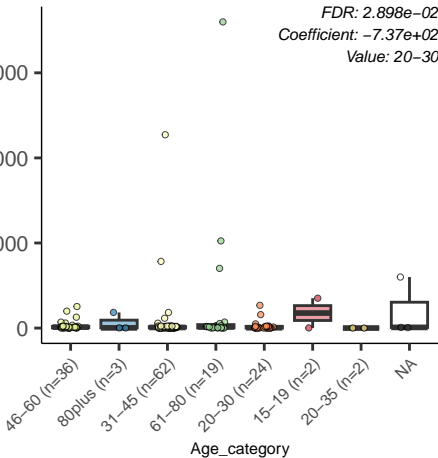

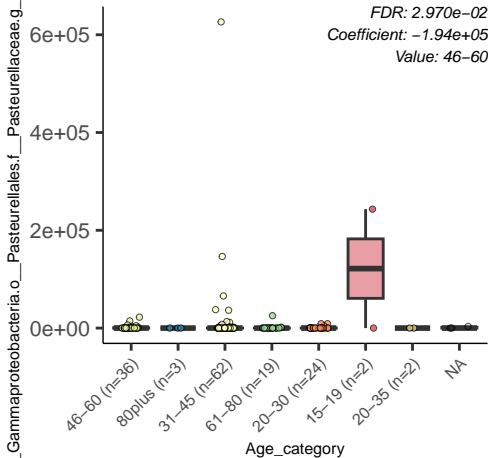

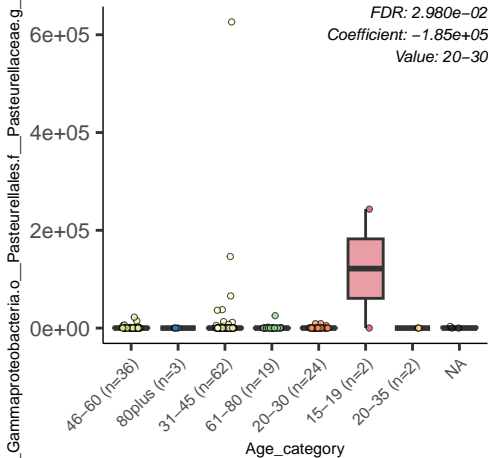

FDR: 3.063e-02  
Coefficient: -7.33e+02  
Value: 20-30

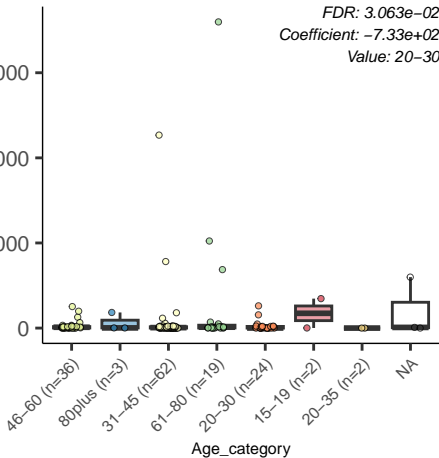

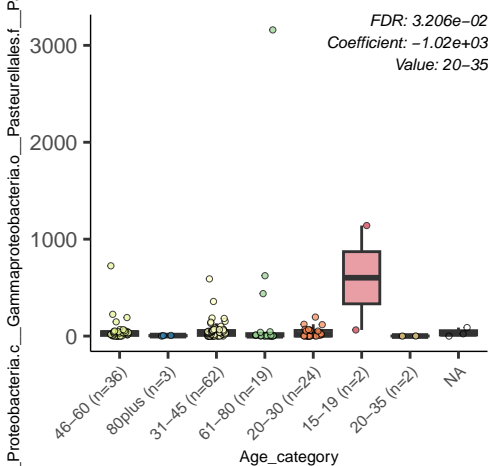

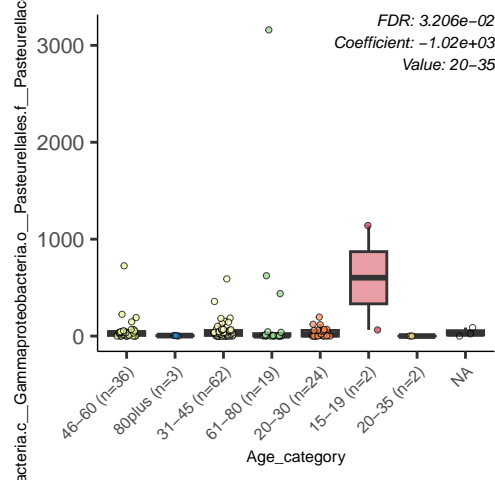



Bacteria.p\_\_Bacteroidetes.c\_\_Flavobacteriia.o\_\_Flavobacteriales.f

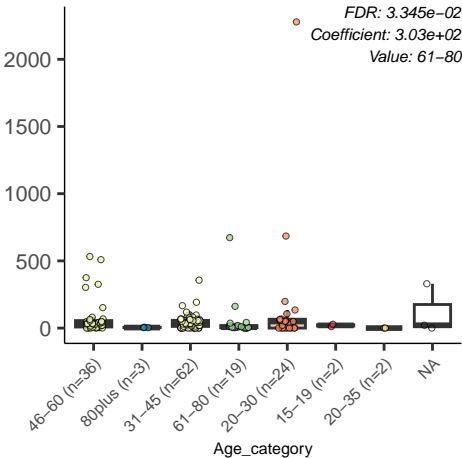

tinomycetia.o\_\_Corynebacteriales.f\_\_Corynebacteriaceae.g\_\_Cory

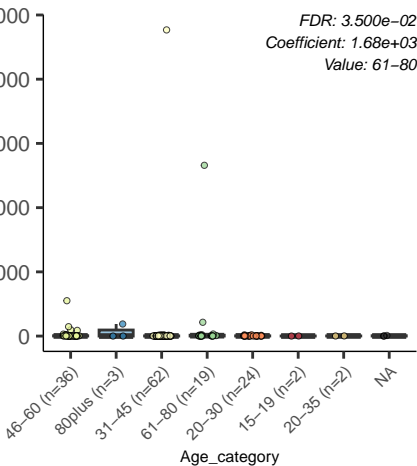

d\_Bacteria.p\_\_Proteobacteria.c\_\_Gammaproteobacteria.o\_\_Car

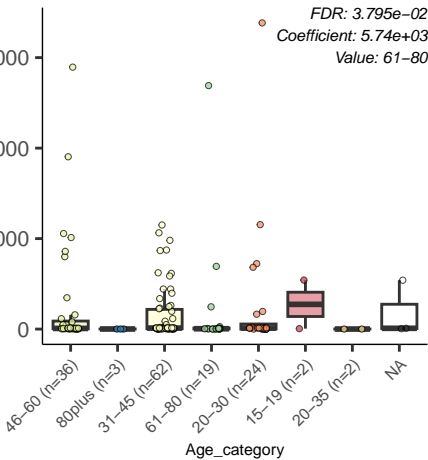

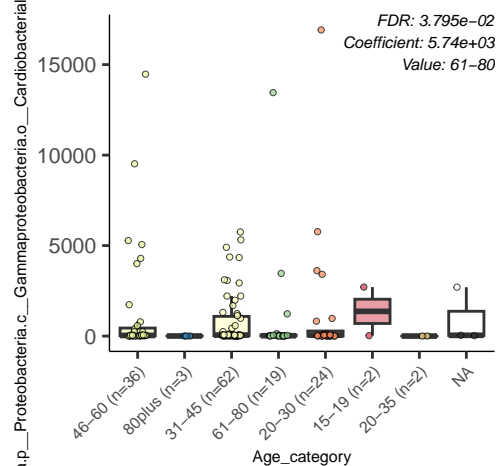

.p\_\_Proteobacteria.c\_\_Alphaproteobacteria.o\_\_Hyphomicrobiales.f

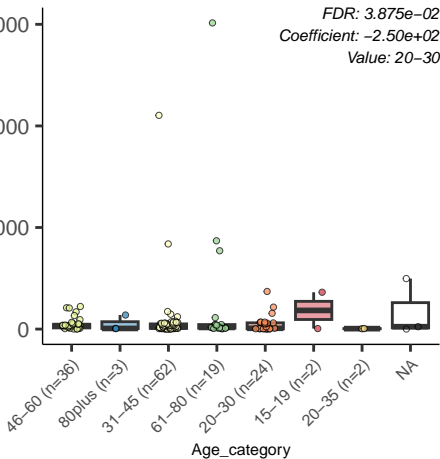

Bacteria.p\_\_Firmicutes.c\_\_Clostridia.o\_\_Eubacteriales.f\_\_Clostridia

FDR:  $3.907e-02$   
Coefficient:  $-1.23e+03$   
Value: 20-30

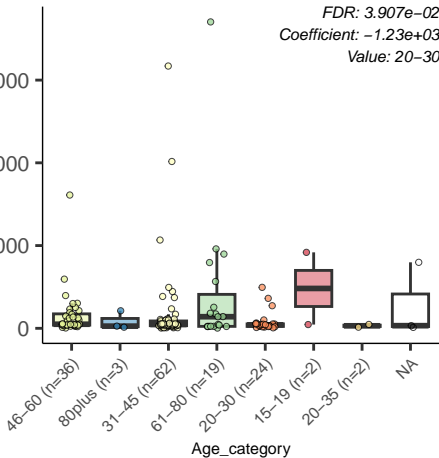

FDR:  $3.907e-02$   
Coefficient:  $-1.23e+03$   
Value: 20-30

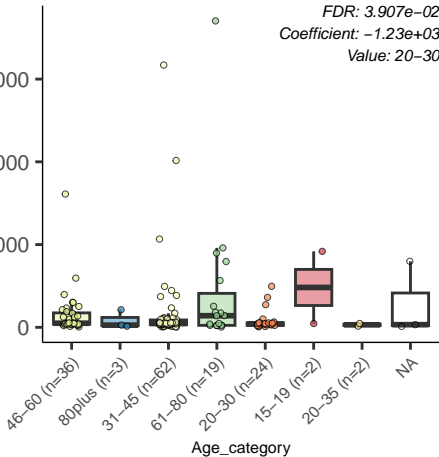

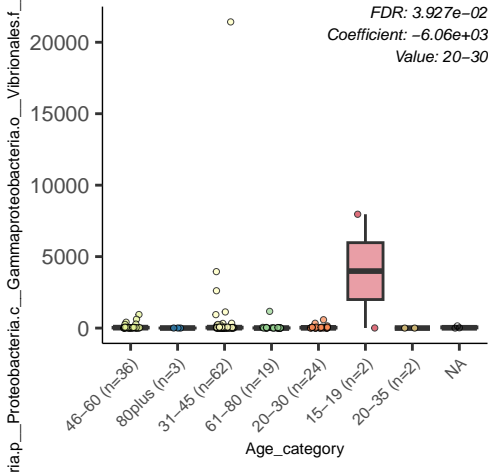



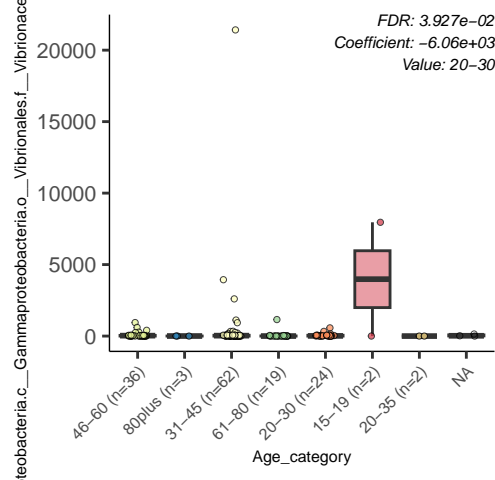

bacteria.o\_\_Synechococcales.f\_\_Synechococcaceae.g\_\_Synechococcus

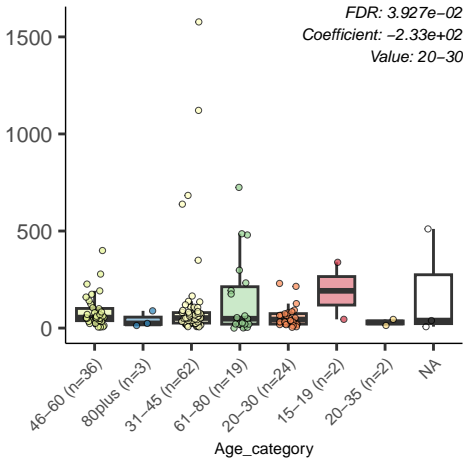

c\_\_Gammaproteobacteria.o\_\_Oceanospirillales.f\_\_Halomonadacea

FDR:  $4.111\text{e-}02$   
Coefficient:  $-2.06\text{e+}04$   
Value: 20-35

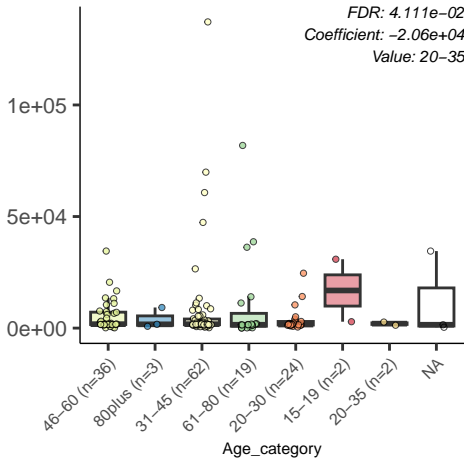

Proteobacteria.c\_\_Gammaproteobacteria.o\_\_Oceanospirillales.f\_\_F

FDR:  $4.133e-02$   
Coefficient:  $-2.05e+04$   
Value: 20-35

1e+05  
5e+04  
0e+00

46-60 (n=36)  
80plus (n=3)  
31-45 (n=62)  
61-80 (n=19)  
20-30 (n=24)  
15-19 (n=2)  
20-35 (n=2)  
NA

Age\_category

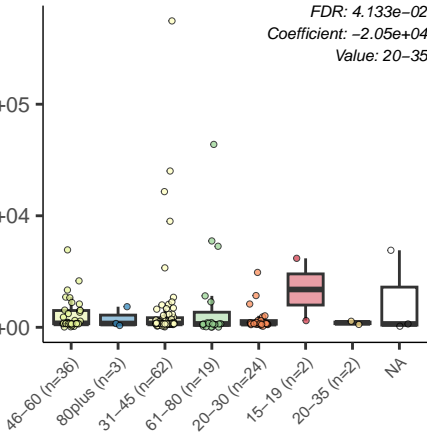

bacteria.c\_\_Alphaproteobacteria.o\_\_Hyphomicrobiales.f\_\_Rhizobiales

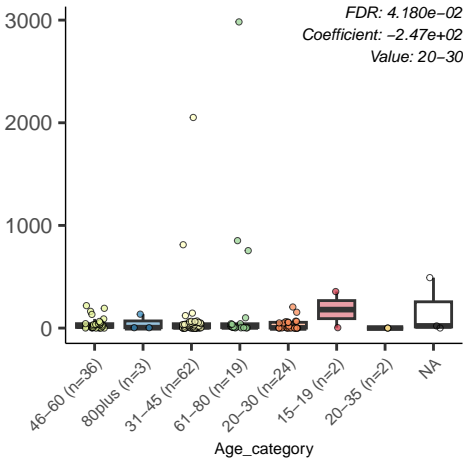

Proteobacteria.c\_\_Alphaproteobacteria.o\_\_Rickettsiales.f\_\_Anap

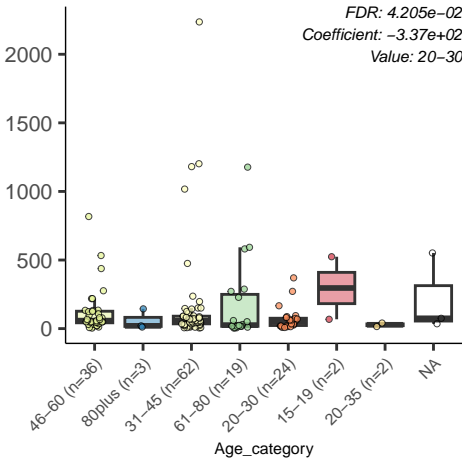

eria.p\_\_Proteobacteria.c\_\_Gammaproteobacteria.o\_\_Oceanospirilla

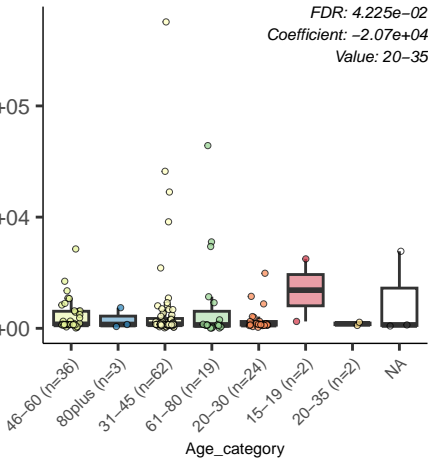

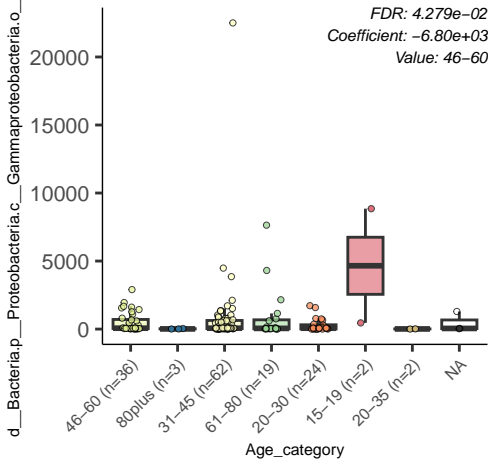



Bacteria.p\_\_Proteobacteria.c\_\_Gammaproteobacteria.o\_\_Vibrion

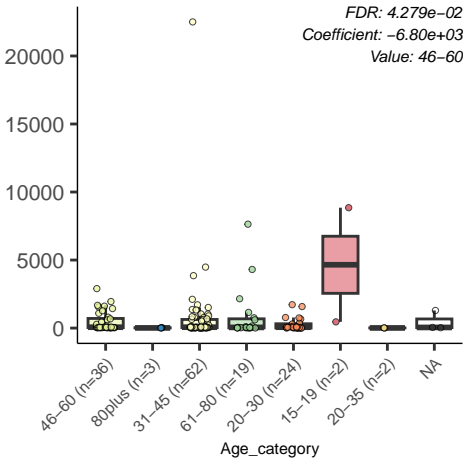

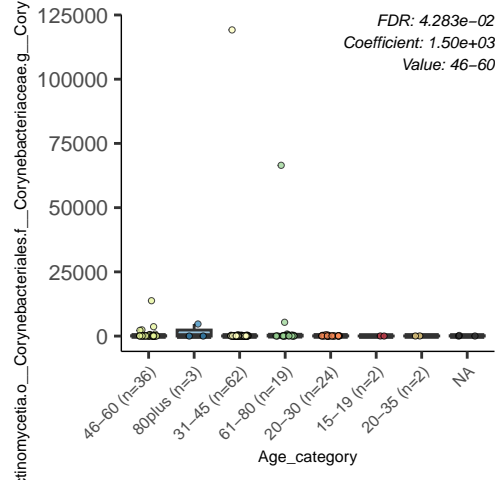

obacteria.c\_\_Betaproteobacteria.o\_\_Burkholderiales.f\_\_Comamonad

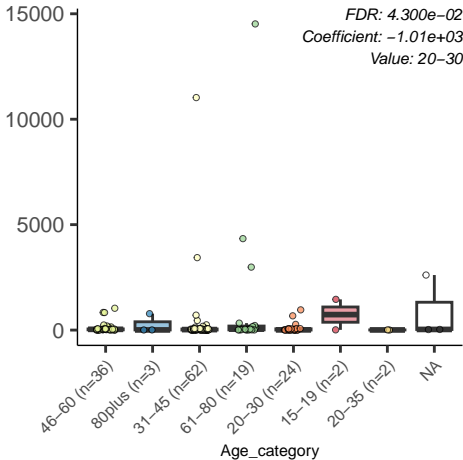

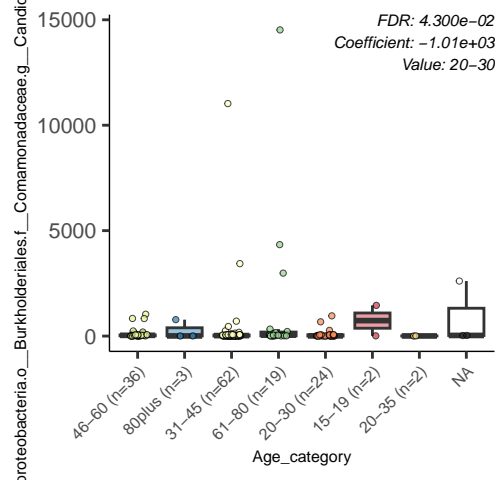

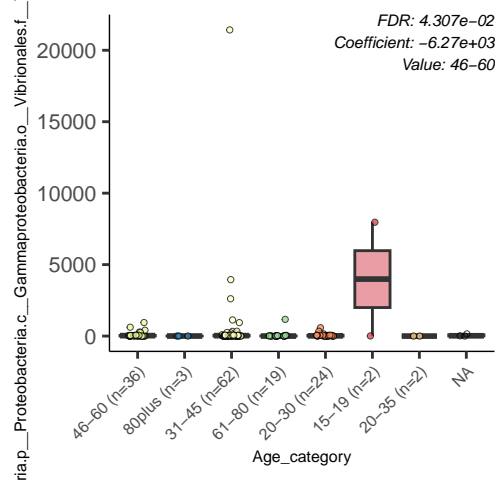

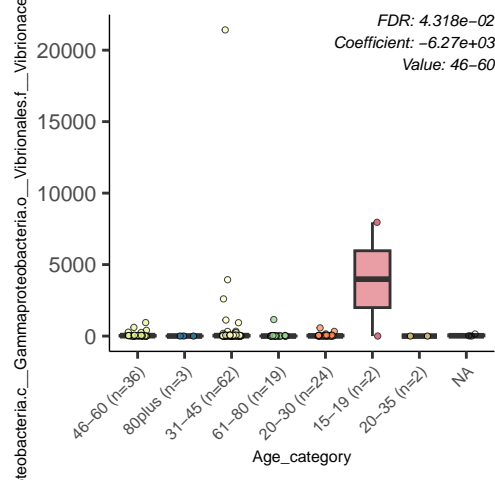

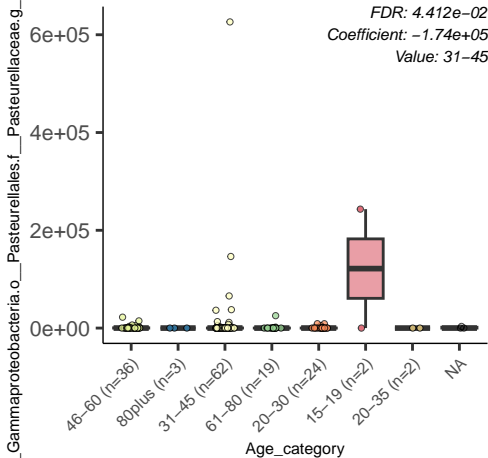

d\_\_Bacteria.p\_\_Proteobacteria.c\_\_Gammaproteobacteria.o\_\_Oscillatoriales

FDR:  $4.989 \times 10^{-2}$   
Coefficient:  $-2.03 \times 10^4$   
Value: 20-35

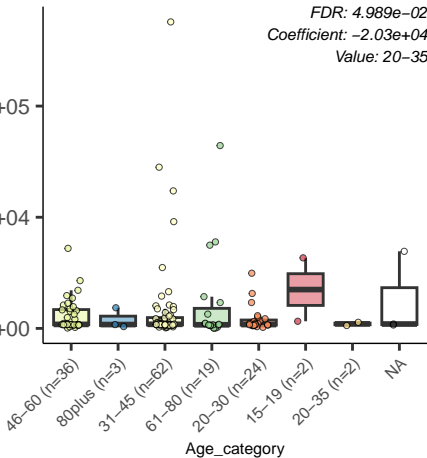



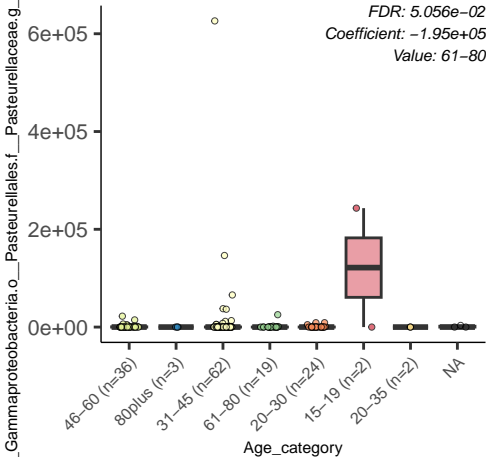

eria.p\_\_Proteobacteria.c\_\_Gammaproteobacteria.o\_\_Oceanospirilla

FDR:  $5.088e-02$   
Coefficient:  $-1.77e+04$   
Value: 46-60

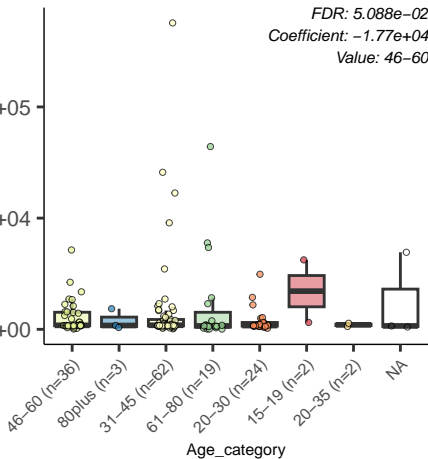

c\_\_Gammaproteobacteria.o\_\_Oceanospirillales.f\_\_Halomonadacea

FDR:  $5.136e-02$   
Coefficient:  $-1.75e+04$   
Value: 46-60

1e+05  
5e+04  
0e+00

46-60 (n=36)  
80plus (n=3)  
31-45 (n=62)  
61-80 (n=19)  
20-30 (n=24)  
15-19 (n=2)  
20-35 (n=2)  
NA

Age\_category

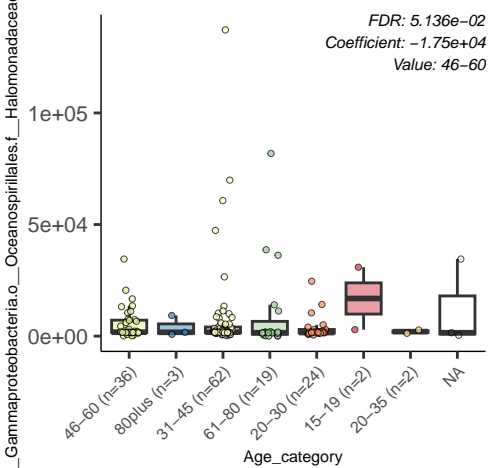

Firmicutes.c\_Clostridia.o\_Eubacteriales.f\_Clostridiaceae.g\_C

FDR:  $5.140 \times 10^{-2}$   
Coefficient:  $-4.54 \times 10^3$   
Value: 31-45

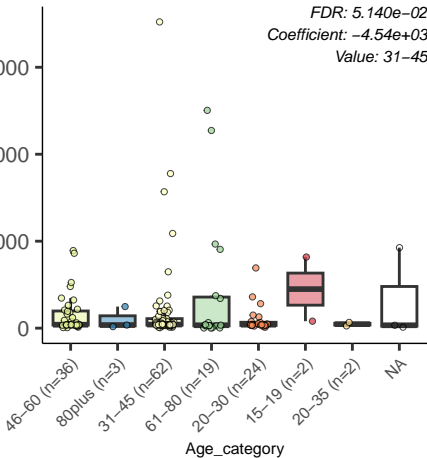

Proteobacteria.c\_\_Gammaproteobacteria.o\_\_Oceanospirillales.f\_\_H

FDR:  $5.157e-02$   
Coefficient:  $-1.75e+04$   
Value: 46-60

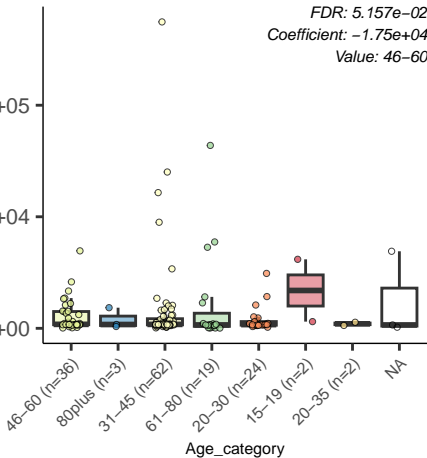

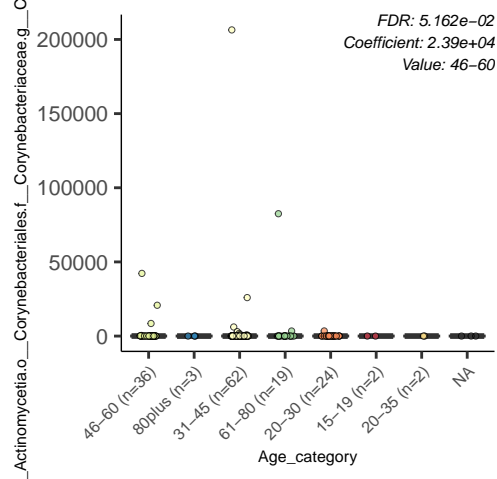

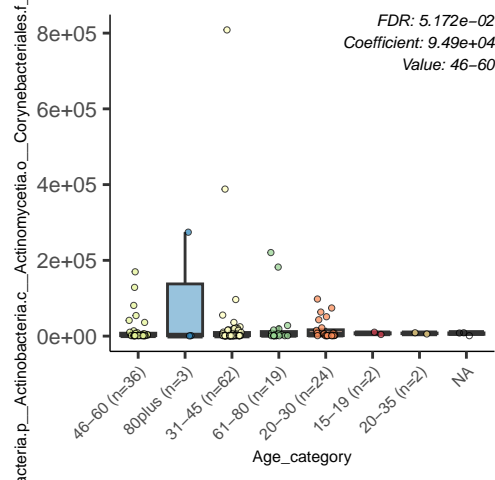

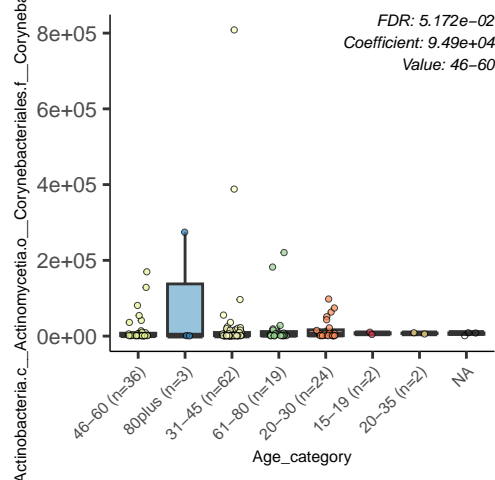



d\_\_Bacteria.p\_\_Actinobacteria.c\_\_Actinomycetia.o\_\_Coryneb

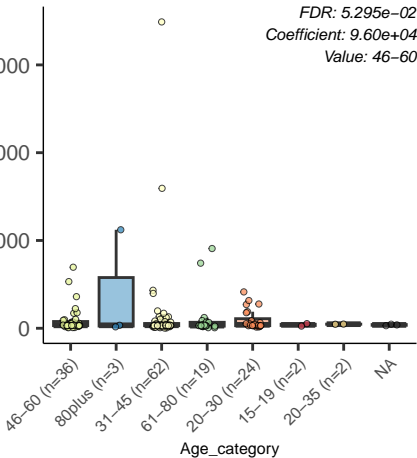

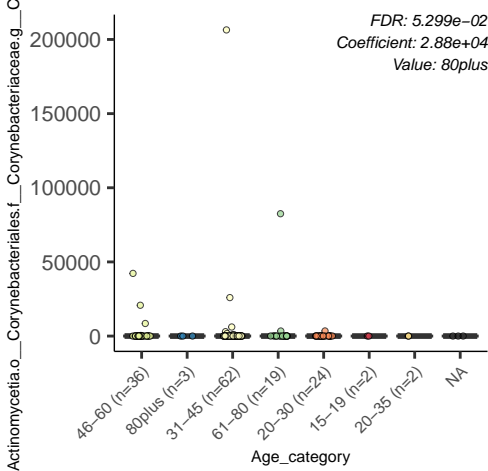

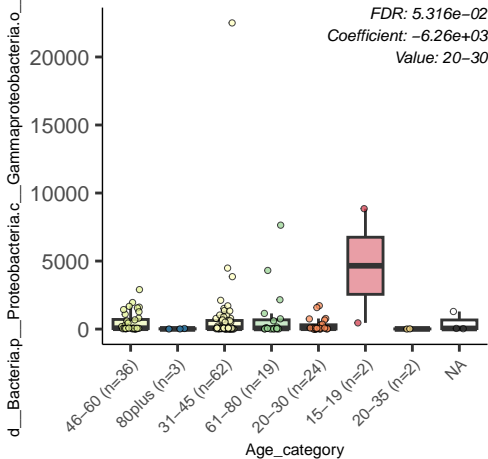

Bacteria.p\_\_Proteobacteria.c\_\_Gammaproteobacteria.o\_\_Vibrion

FDR:  $5.316e-02$   
Coefficient:  $-6.26e+03$   
Value: 20-30

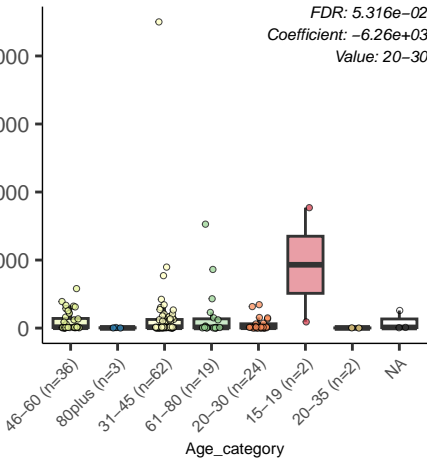

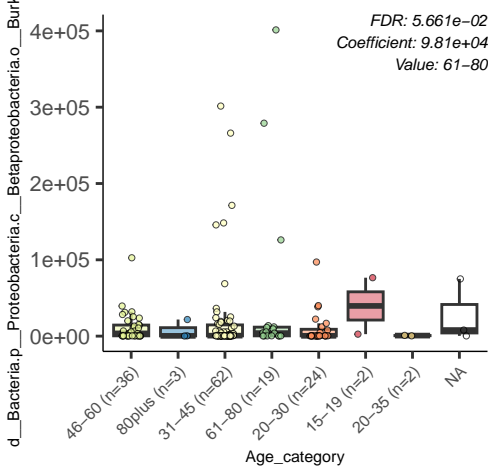

\_\_Epsilonproteobacteria.o\_\_Campylobacteriales.f\_\_Campylobacter

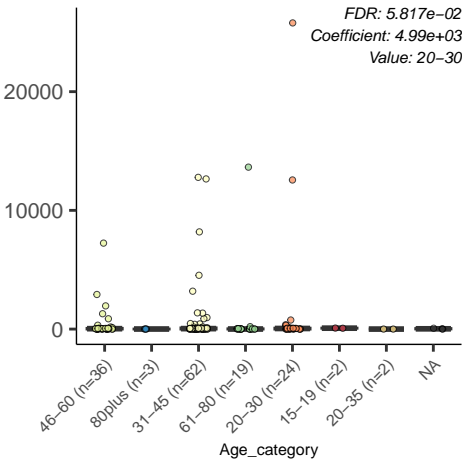

d\_\_Bacteria.p\_\_Proteobacteria.c\_\_Gammaproteobacteria.o\_\_Oscillatoriales

FDR:  $5.842e-02$   
Coefficient:  $-1.75e+04$   
Value: 46-60

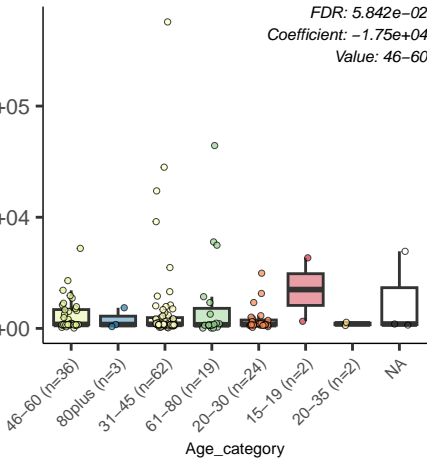

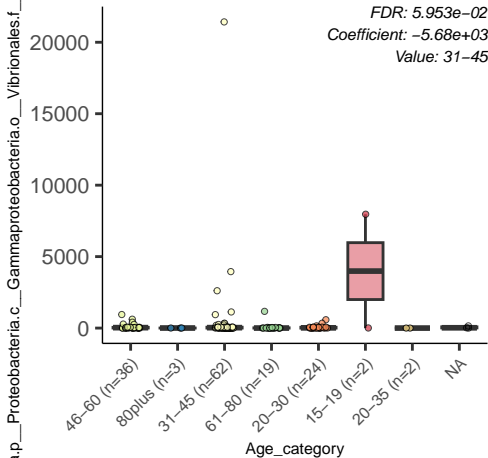



teobacteria.c\_\_Gammaproteobacteria.o\_\_Vibrionales.f\_\_Vibrionaceae

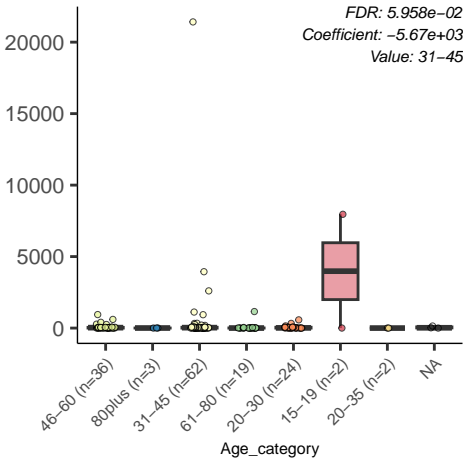

l\_Bacteria.p\_\_Proteobacteria.c\_\_Betaproteobacteria.o\_\_Burkholder

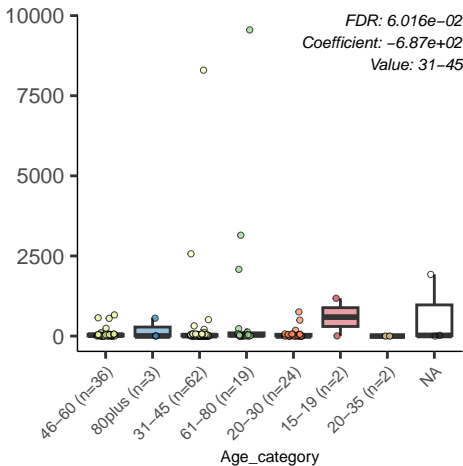

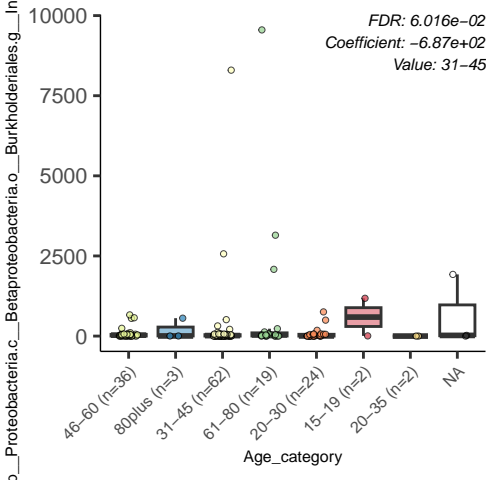

Gammaproteobacteria.o\_\_Pasteurellales.f\_\_Pasteurellaceae.g\_\_Ag

*FDR: 6.074e-02*  
*Coefficient: 1.84e+03*  
*Value: 61-80*

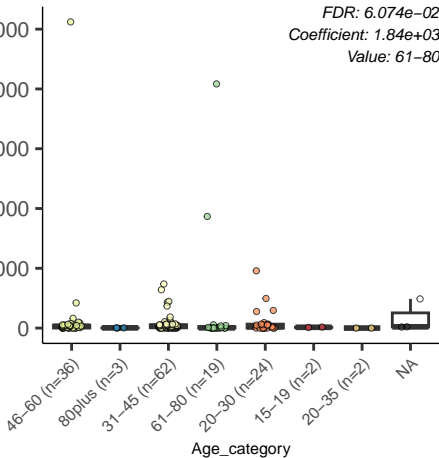

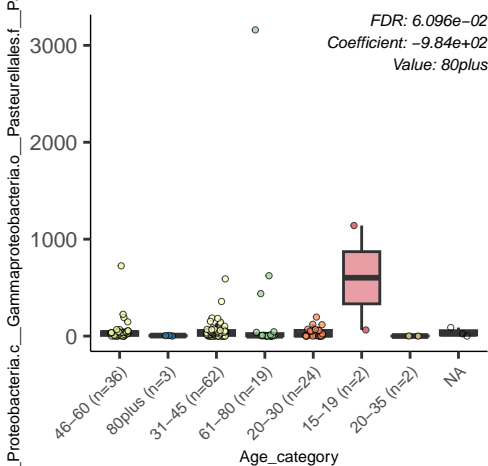

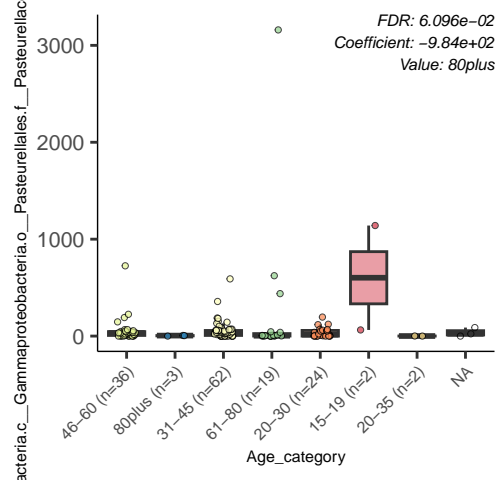

Bacteria.p\_\_Proteobacteria.c\_\_Betaproteobacteria.o\_\_Burkholder

FDR: 6.223e-02  
Coefficient: -4.70e+02  
Value: 20-30

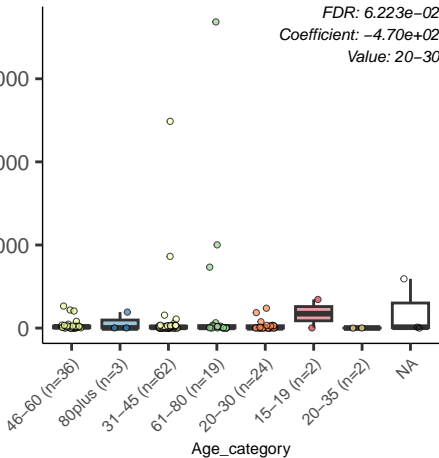

Proteobacteria.c\_\_Betaproteobacteria.o\_\_Burkholderiales.g\_\_Lep

FDR: 6.223e-02  
Coefficient: -4.70e+02  
Value: 20-30

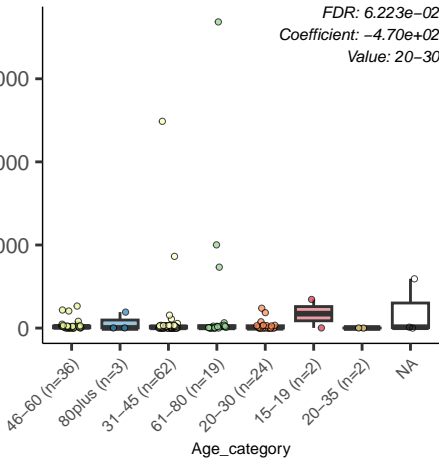



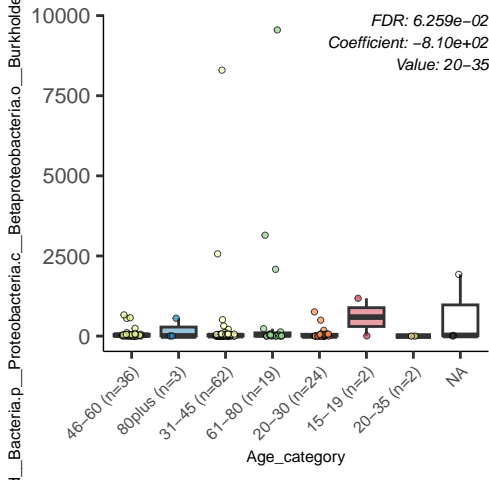

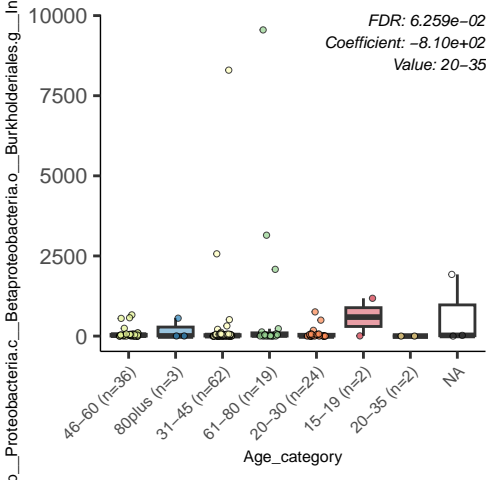

d\_Bacteria.p\_\_Proteobacteria.c\_\_Gammaproteobacteria.o\_\_

FDR:  $6.843e-02$   
Coefficient:  $-6.00e+03$   
Value: 31-45

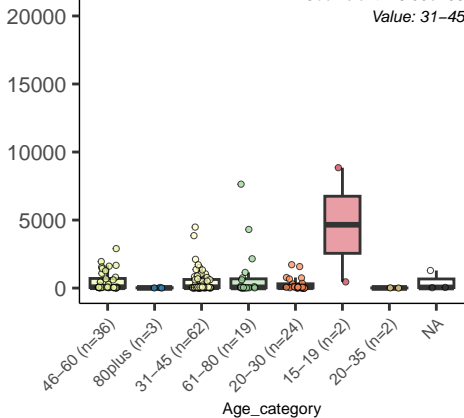

Bacteria.p\_\_Proteobacteria.c\_\_Gammaproteobacteria.o\_\_Vibrion

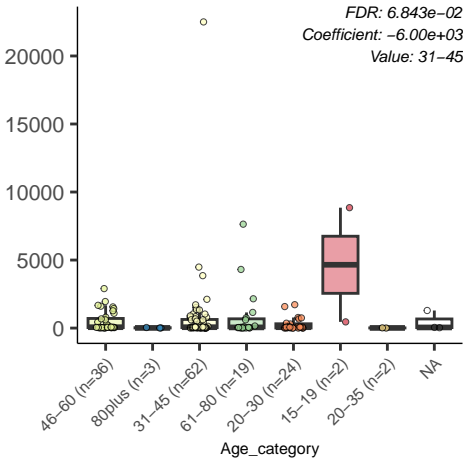

46-60 (n=36)  
80plus (n=3)  
31-45 (n=62)  
61-80 (n=19)  
20-30 (n=24)  
15-19 (n=2)  
20-35 (n=2) NA

Age\_category

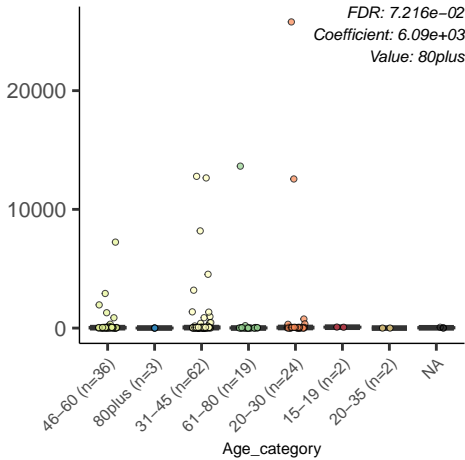

Age\_category

ia.p\_\_Proteobacteria.c\_\_Alphaproteobacteria.o\_\_Hyphomicrobiales

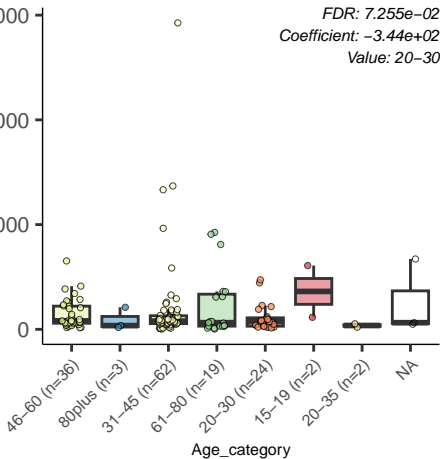

ria.c\_\_Alphaproteobacteria.o\_\_Hyphomicrobiales.g\_\_Candidatus.H

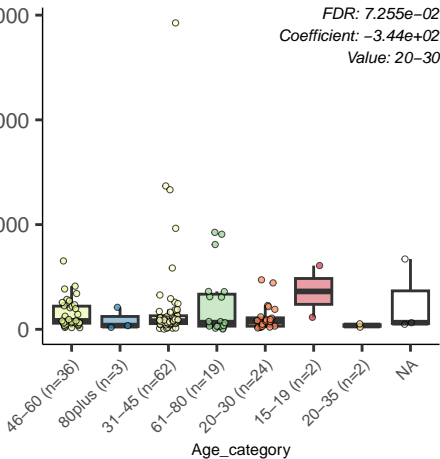

teobacteria.c\_\_Gammaproteobacteria.o\_\_Vibrionales.f\_\_Vibrionaceae

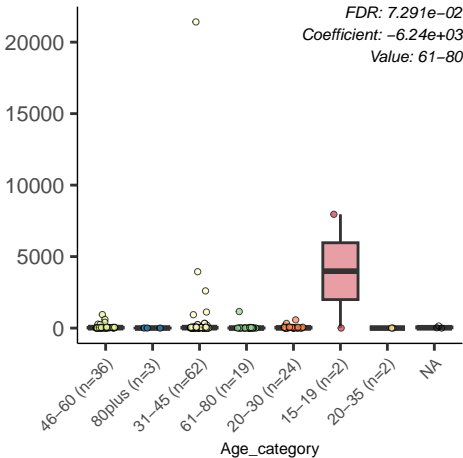



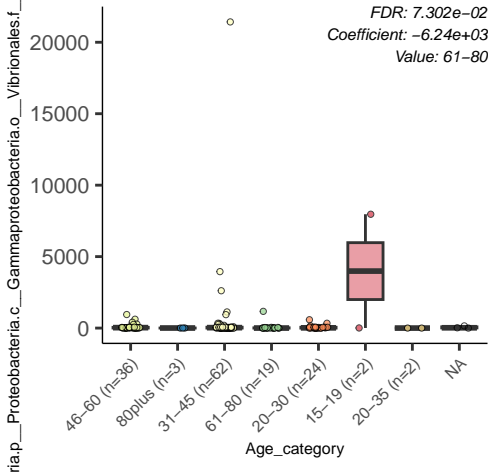

obacteria.c\_\_Betaproteobacteria.o\_\_Burkholderiales.f\_\_Comamonad

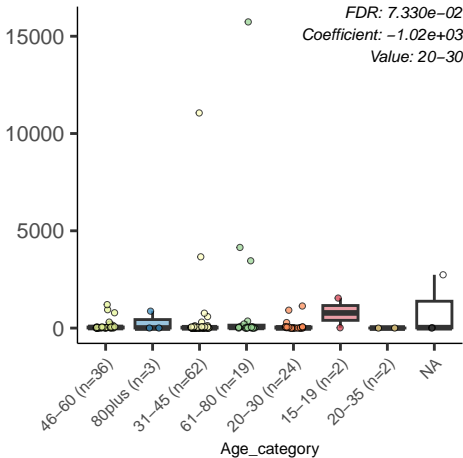

tertia.c\_\_Gammaproteobacteria.o\_\_Pasteurellales.f\_\_Pasteurellaceae

FDR:  $7.350e-02$   
Coefficient:  $-1.08e+04$   
Value: 20-30

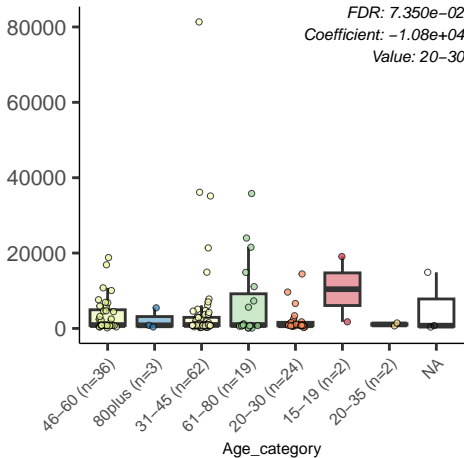

\_\_Epsilonproteobacteria.o\_\_Campylobacteriales.f\_\_Campylobacter

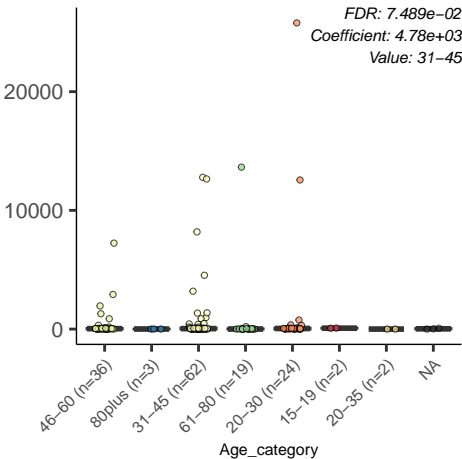



p\_\_Proteobacteria.c\_\_Betaproteobacteria.o\_\_Burkholderiales.f\_\_Bu

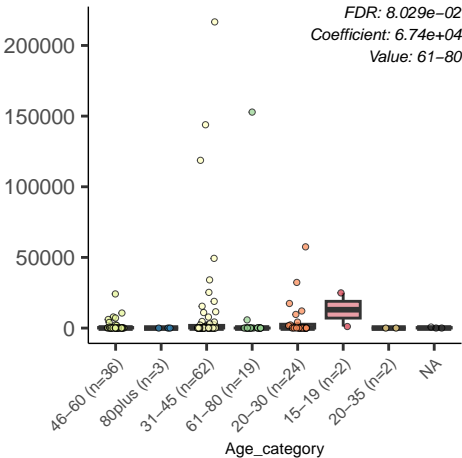

acteria.c\_\_Betaproteobacteria.o\_\_Burkholderiales.f\_\_Burkholderia

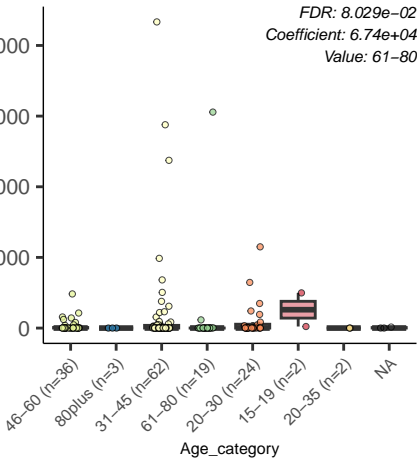

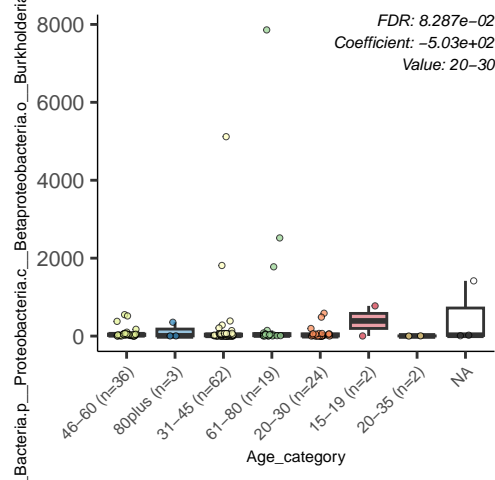



d\_\_Bacteria.p\_\_Cyanobacteria.o\_\_Synechococcales.f\_\_Synech

FDR:  $8.835e-02$   
Coefficient:  $-5.16e+02$   
Value: 20-30

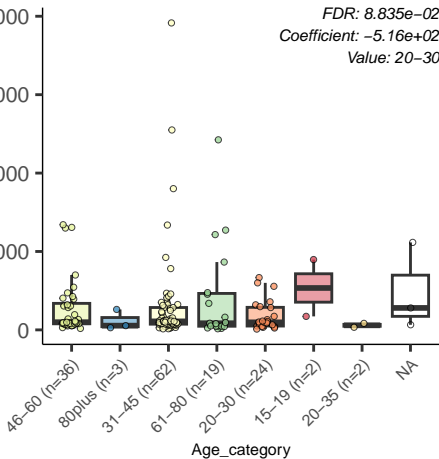

acteria.p\_\_Proteobacteria.c\_\_Betaproteobacteria.o\_\_Burkholderiales

FDR:  $8.852e-02$   
Coefficient:  $7.11e+04$   
Value: 61-80

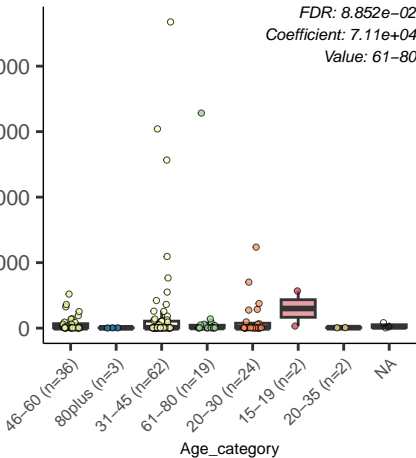

bacteria.o\_\_Synechococcales.f\_\_Synechococcaceae.g\_\_Synechococcus

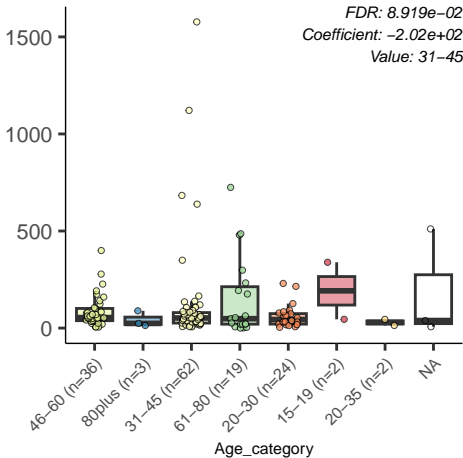

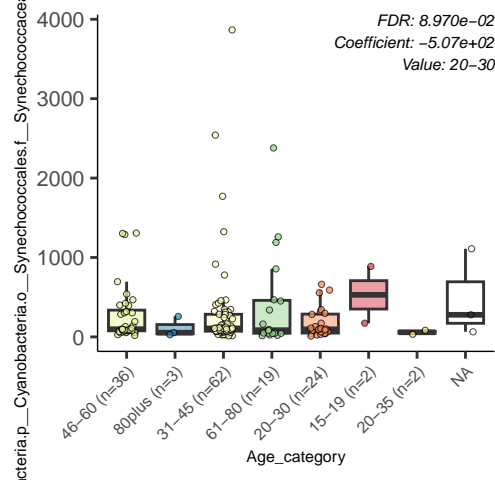

Proteobacteria.c\_\_Alphaproteobacteria.o\_\_Rickettsiales.f\_\_Anap

FDR:  $9.050e-02$   
Coefficient:  $-2.95e+02$   
Value: 31-45

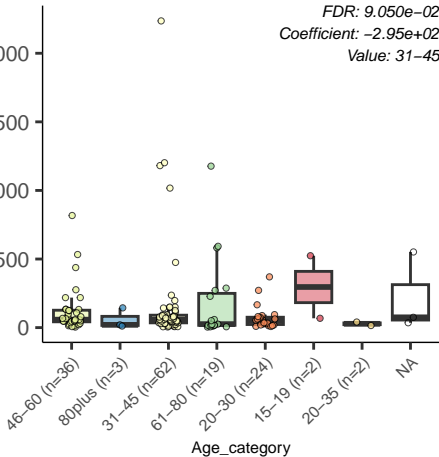

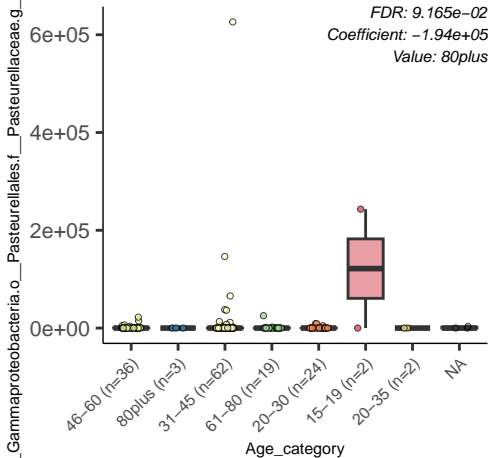

Proteobacteria.c\_\_Betaproteobacteria.o\_\_Burkholderiales.f\_\_Com

FDR:  $9.184e-02$   
Coefficient:  $-2.05e+03$   
Value: 20-30

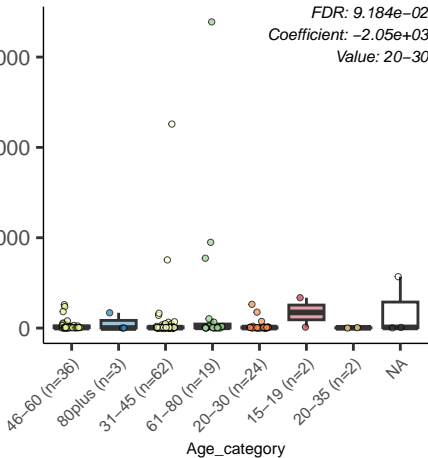

ia.c\_\_Gammaproteobacteria.o\_\_Pasteurellales.f\_\_Pasteurellaceae.

FDR:  $9.203e-02$   
Coefficient:  $-1.66e+03$   
Value: 20-30

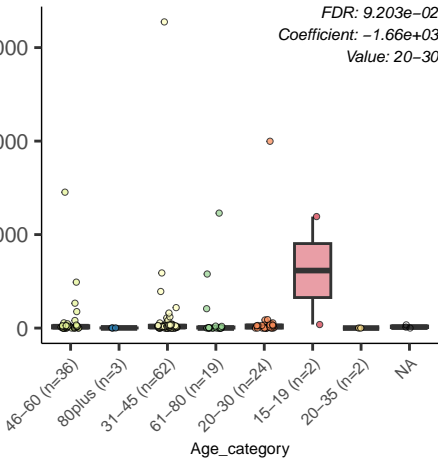



Epsilonproteobacteria.o\_\_Campylobacterales.f\_\_Campylobacteraceae

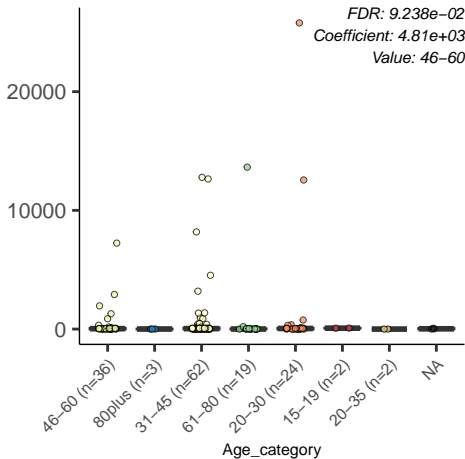

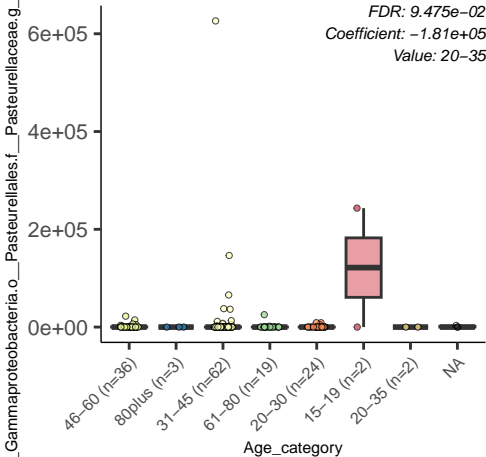

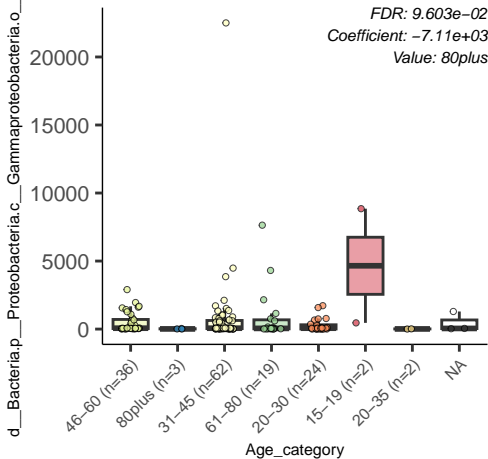

Bacteria.p\_\_Proteobacteria.c\_\_Gammaproteobacteria.o\_\_Vibrion

FDR:  $9.603e-02$   
Coefficient:  $-7.11e+03$   
Value: 80plus

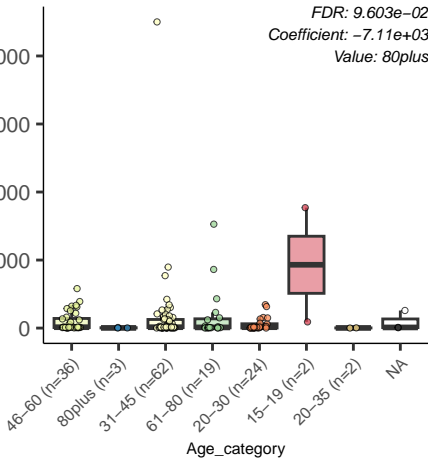

bacteria.o\_\_Synechococcales.f\_\_Synechococcaceae.g\_\_Synechococcus

*FDR: 9.969e-02*  
*Coefficient: -2.35e+02*  
*Value: 20-35*

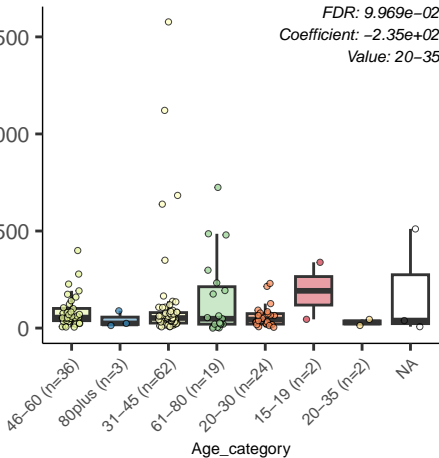

Firmicutes.c\_\_Clostridia.o\_\_Eubacteriales.f\_\_Clostridiaceae.g\_\_C

FDR: 1.001e-01  
Coefficient: -4.77e+03  
Value: 20-35

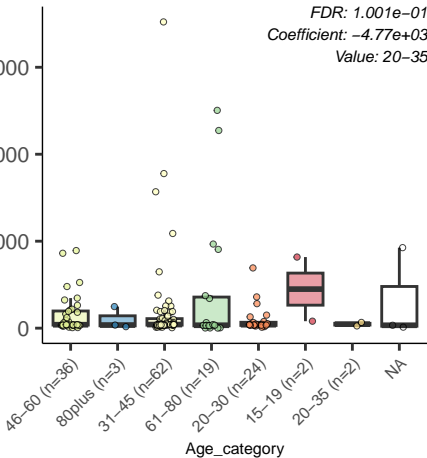

d\_\_Bacteria.p\_\_Proteobacteria.c\_\_Alphaproteobacteria.o\_R

FDR: 1.061e-01  
Coefficient: -7.61e+02  
Value: 80plus

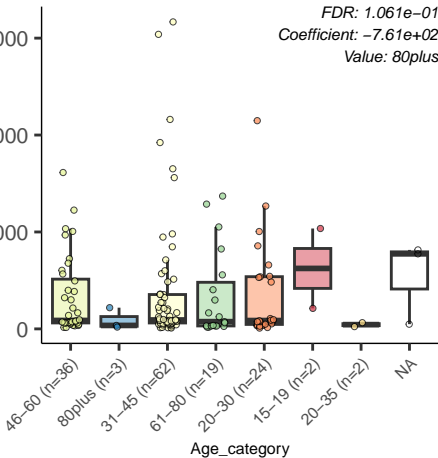

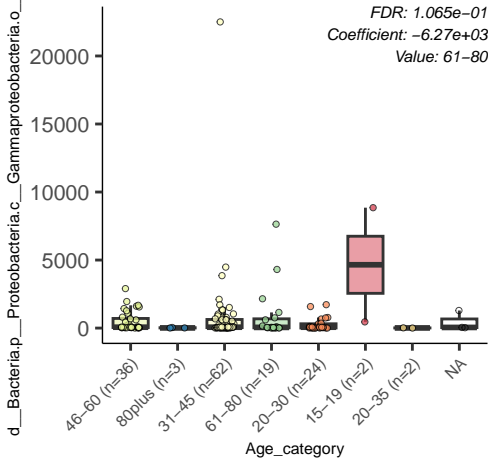



Bacteria.p\_\_Proteobacteria.c\_\_Gammaproteobacteria.o\_\_Vibrion

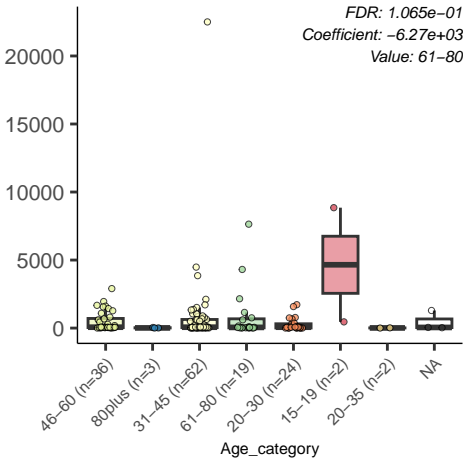

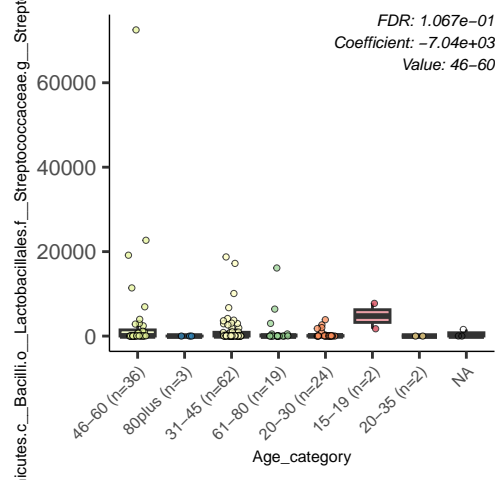

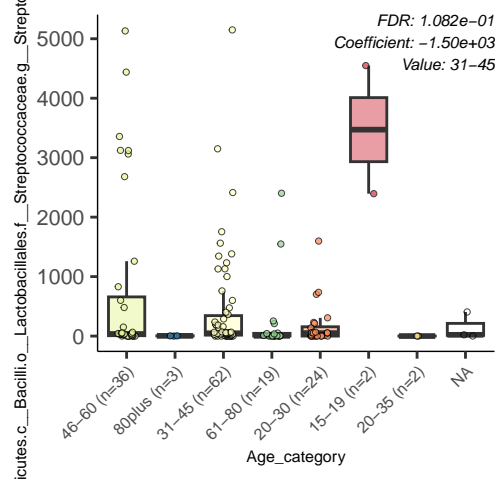

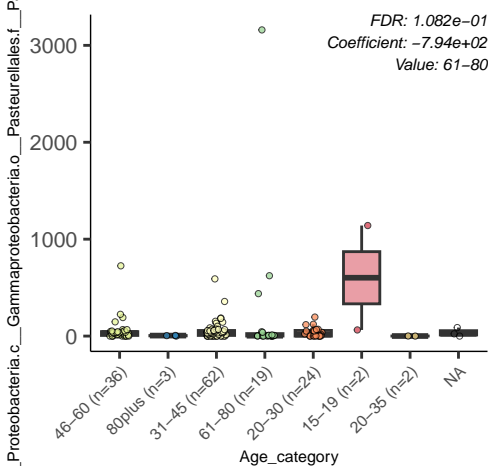

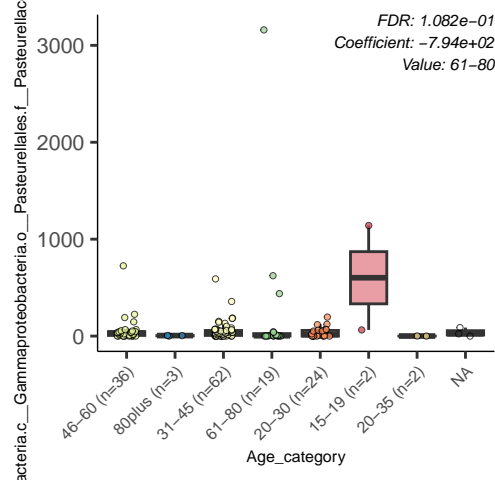

Bacteria.p\_\_Proteobacteria.c\_\_Betaproteobacteria.o\_\_Burkholder

FDR: 1.087e-01  
Coefficient: -5.49e+02  
Value: 20-30

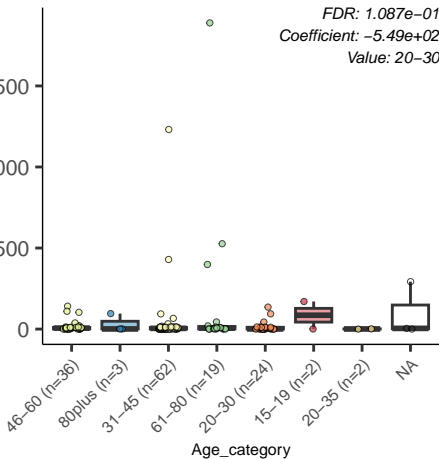

Proteobacteria.c\_\_Betaproteobacteria.o\_\_Burkholderiales.g\_\_Ideo

FDR: 1.087e-01  
Coefficient: -5.49e+02  
Value: 20-30

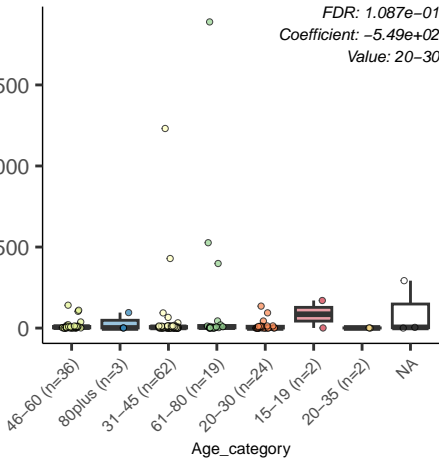

Bacteria.p\_\_Firmicutes.c\_\_Clostridia.o\_\_Eubacteriales.f\_\_Clostridia

FDR:  $1.105e-01$   
Coefficient:  $-1.02e+03$   
Value: 31-45

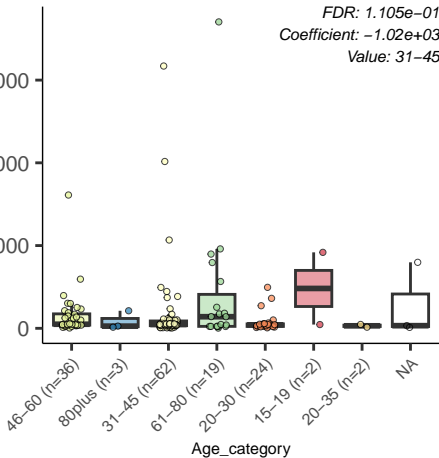



FDR:  $1.105e-01$   
Coefficient:  $-1.02e+03$   
Value: 31-45

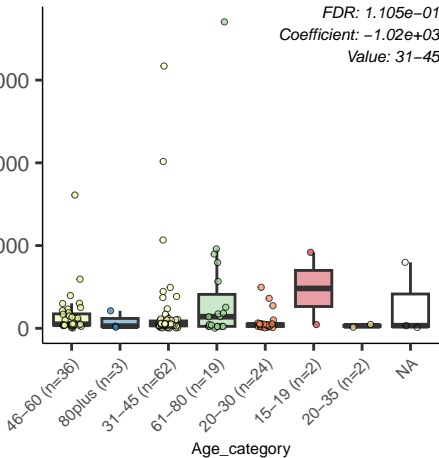

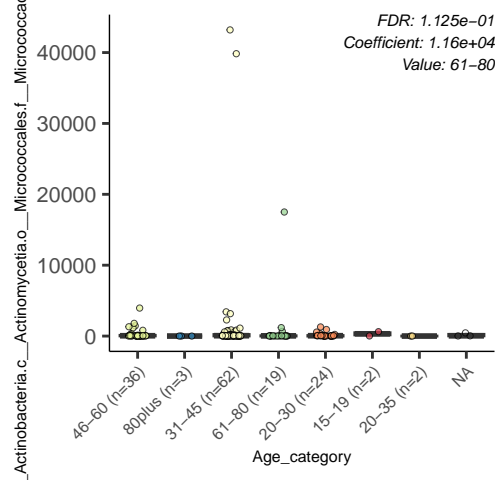

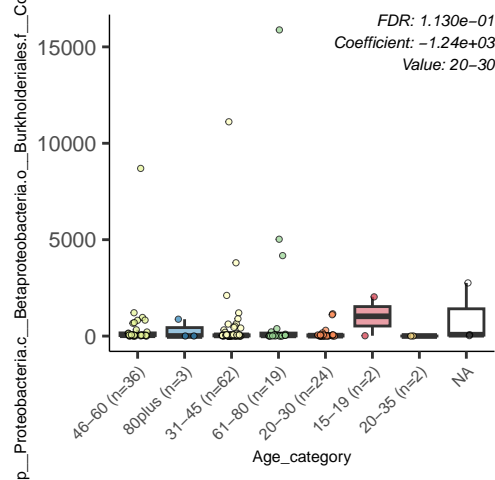

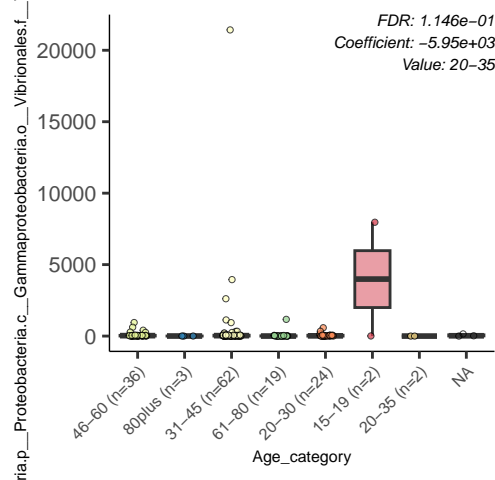



ammaproteobacteria.o\_\_Alteromonadales.f\_\_Pseudoalteromonada

FDR: 1.157e-01  
Coefficient: -5.34e+03  
Value: 20-30

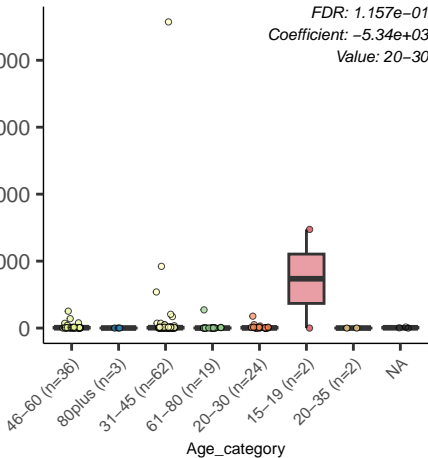



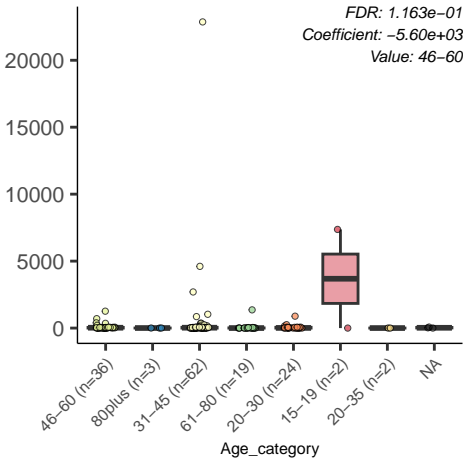



bacteria.c\_\_Alphaproteobacteria.o\_\_Hyphomicrobiales.f\_\_Rhizobiales

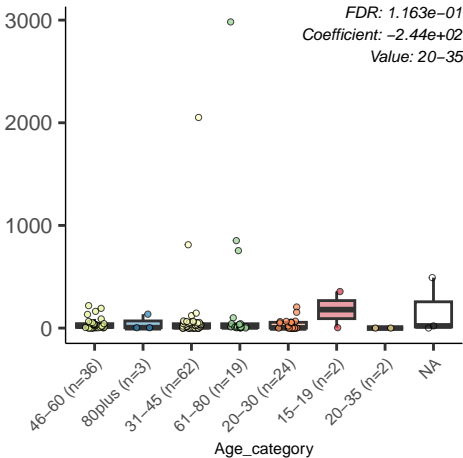

Proteobacteria.c\_\_Alphaproteobacteria.o\_\_Rickettsiales.f\_\_Anap

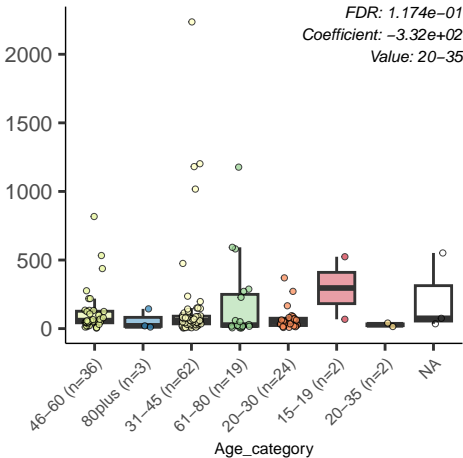

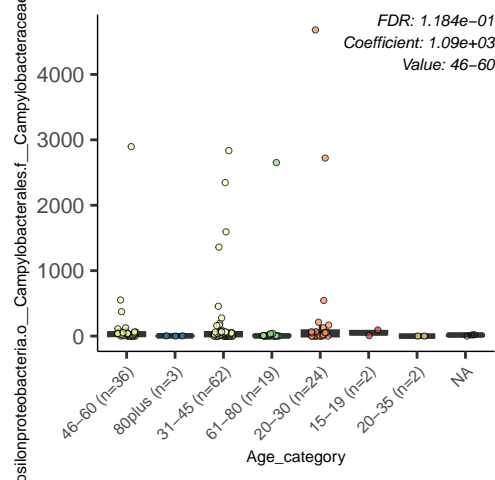

Proteobacteria.c\_\_Betaproteobacteria.o\_\_Burkholderiales.f\_\_Alcal

FDR: 1.185e-01  
Coefficient: -6.87e+02  
Value: 20-35

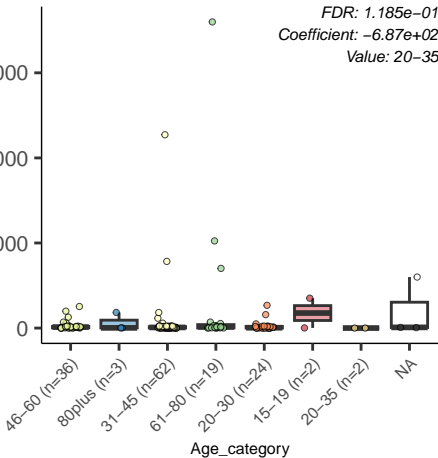





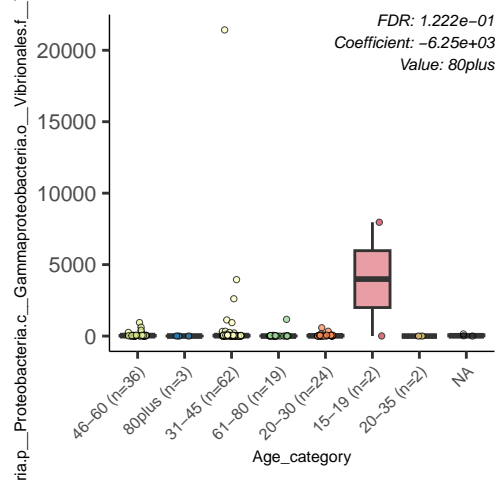

teobacteria.c\_\_Gammaproteobacteria.o\_\_Vibrionales.f\_\_Vibrionaceae

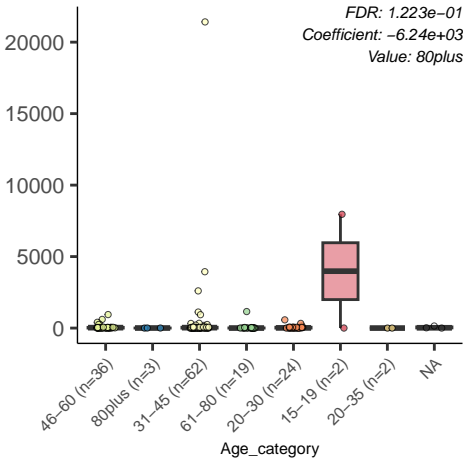



.p\_\_Proteobacteria.c\_\_Alphaproteobacteria.o\_\_Hyphomicrobiales.f

FDR: 1.229e-01  
Coefficient: -2.41e+02  
Value: 20-35

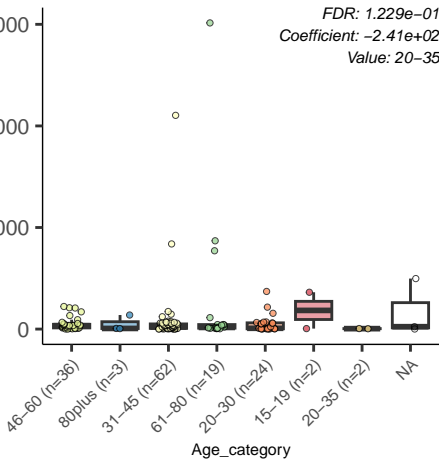

Bacteria.p\_\_Proteobacteria.c\_\_Betaproteobacteria.o\_\_Burkholderia

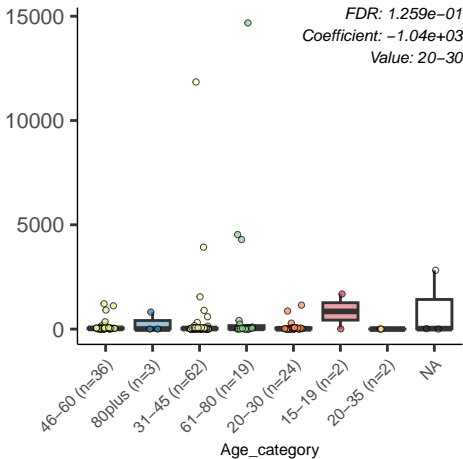

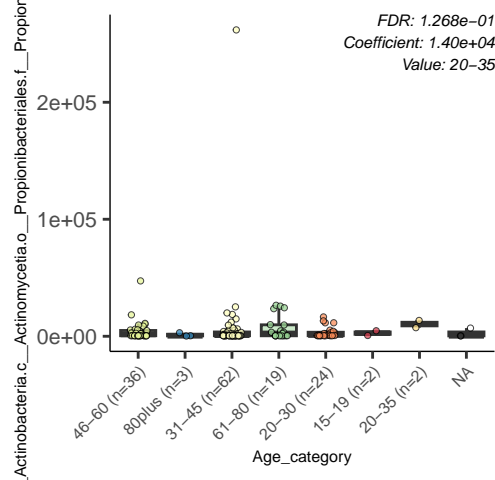

bacteria.p\_\_Proteobacteria.c\_\_Alphaproteobacteria.o\_\_Rickettsiales

FDR:  $1.275e-01$   
Coefficient:  $-3.30e+02$   
Value: 20-30

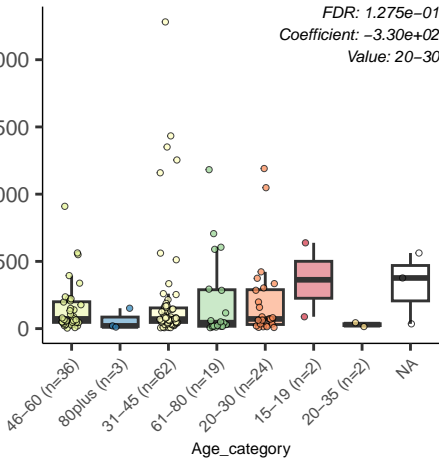

d\_\_Bacteria.p\_\_Cyanobacteria.o\_\_Synechococcales.f\_\_Synech

FDR: 1.306e-01  
Coefficient: -4.75e+02  
Value: 31-45

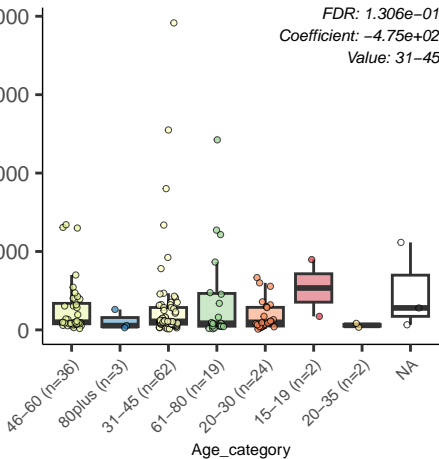

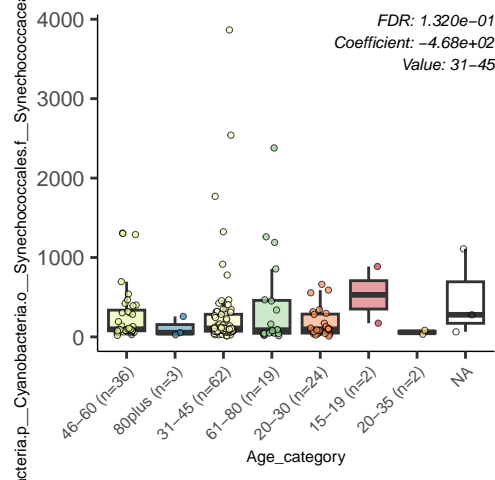

Proteobacteria.c\_\_Betaproteobacteria.o\_\_Burkholderiales.f\_\_Alcal

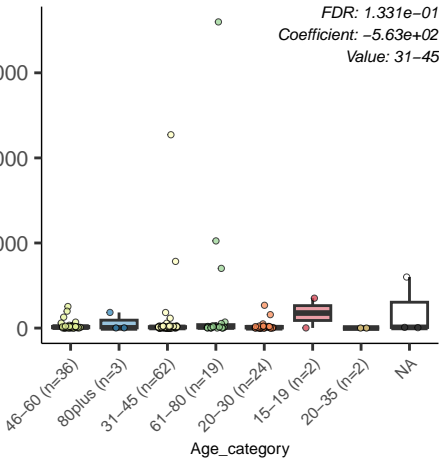

Betaproteobacteria.o\_\_Burkholderiales.f\_\_Comamonadaceae.g

FDR: 1.345e-01  
Coefficient: -4.65e+02  
Value: 20-30

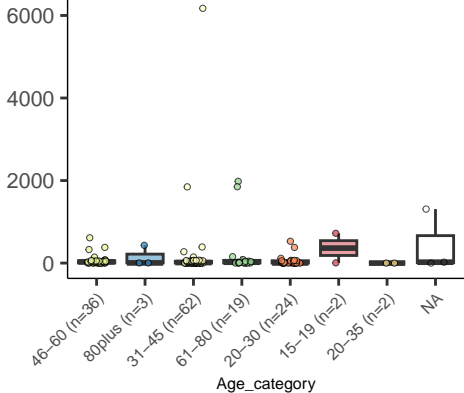



Bacteria.p\_\_Bacteroidetes.c\_\_Flavobacteriia.o\_\_Flavobacteriales.f

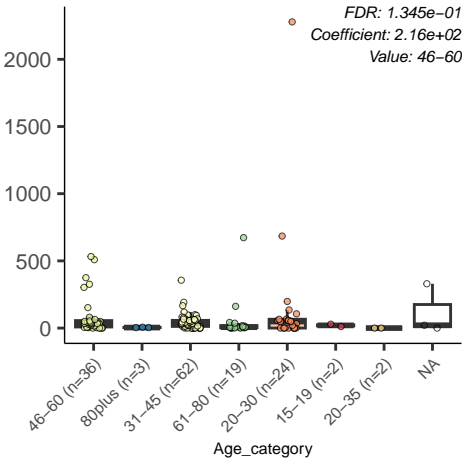

FDR: 1.353e-01  
Coefficient: -5.62e+02  
Value: 31-45

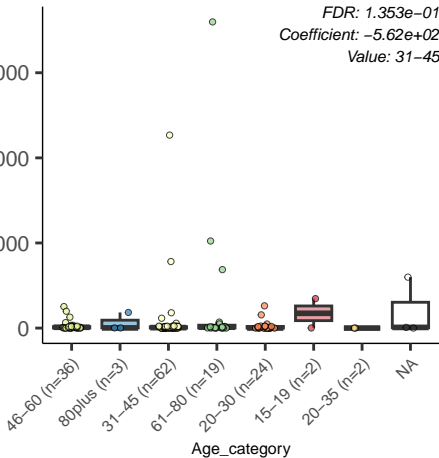

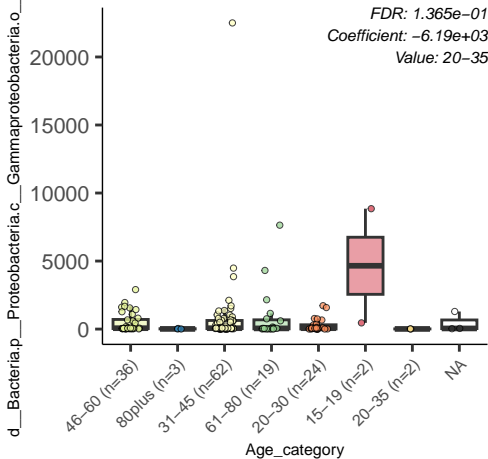

Bacteria.p\_\_Proteobacteria.c\_\_Gammaproteobacteria.o\_\_Vibrion

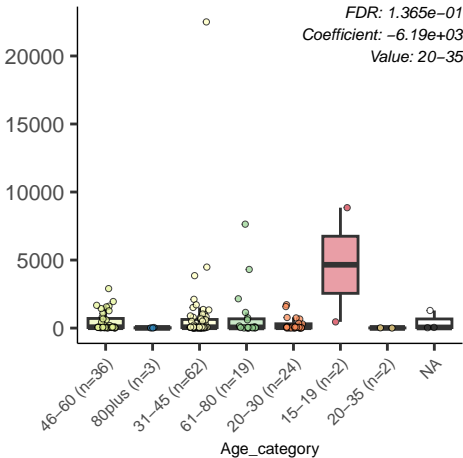

d\_Bacteria.p\_\_Proteobacteria.c\_\_Oligoflexia.o\_\_Bacteriov

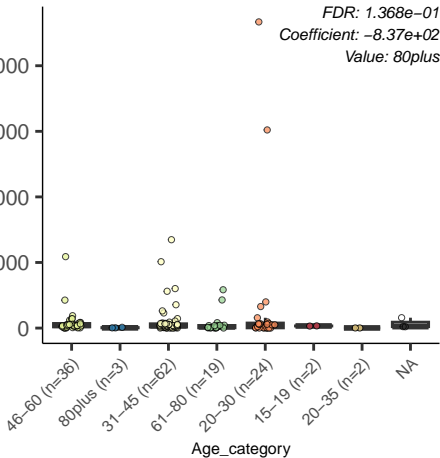

Gamma\_\_Gammaproteobacteria.o\_\_Cardiobacteriales.f\_\_Cardiobacteriaceae

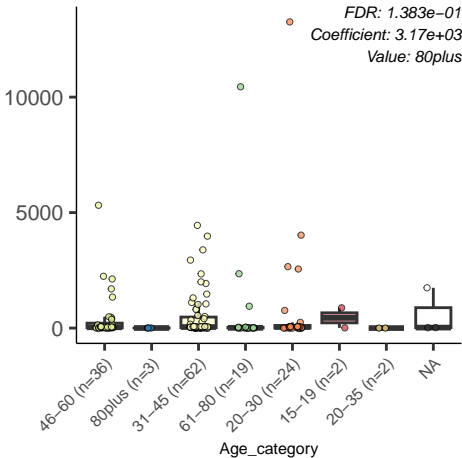

ia.p\_\_Proteobacteria.c\_\_Alphaproteobacteria.o\_\_Hyphomicrobiales

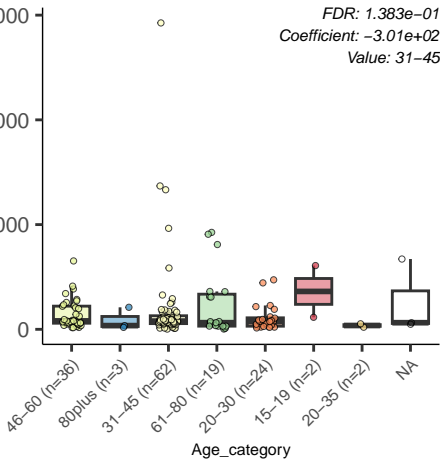

ria.c\_\_Alphaproteobacteria.o\_\_Hyphomicrobiales.g\_\_Candidatus.H

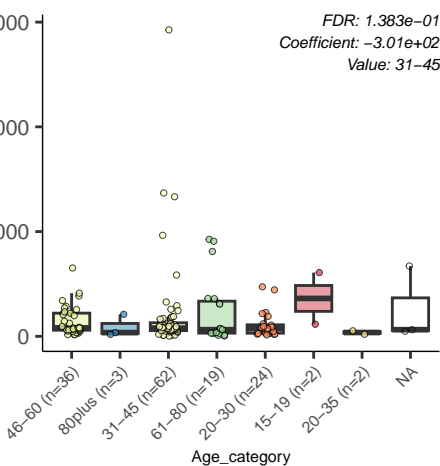



ia.c\_\_Gammaproteobacteria.o\_\_Pasteurellales.f\_\_Pasteurellaceae.

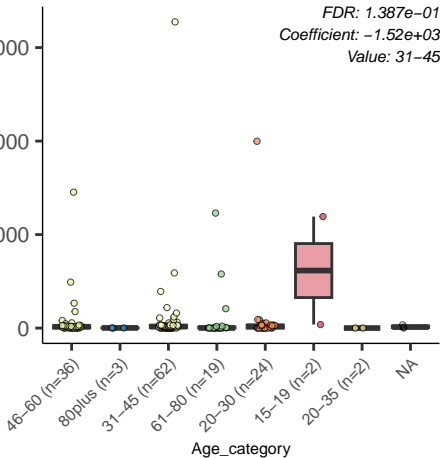

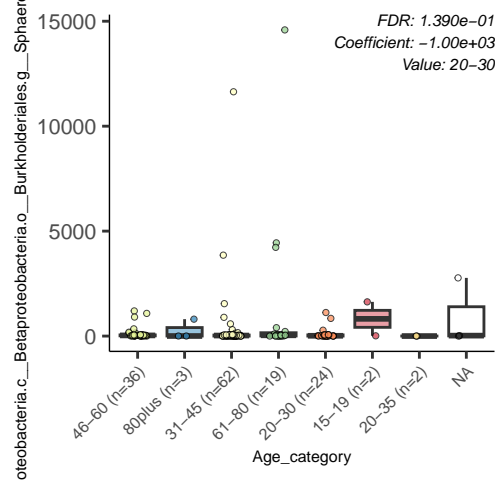

ia.c\_\_Gammaproteobacteria.o\_\_Pasteurellales.f\_\_Pasteurellaceae.

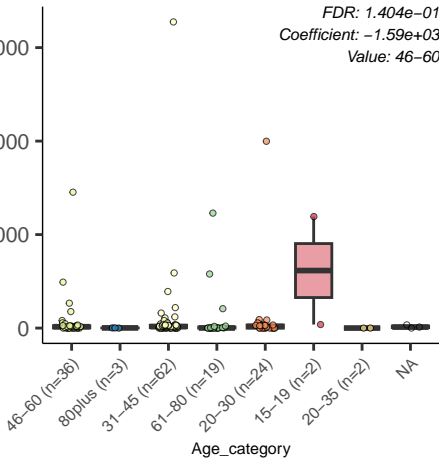

Proteobacteria.c\_\_Betaproteobacteria.o\_\_Burkholderiales.f\_\_Com

FDR:  $1.405e-01$   
Coefficient:  $-4.67e+02$   
Value: 20-30

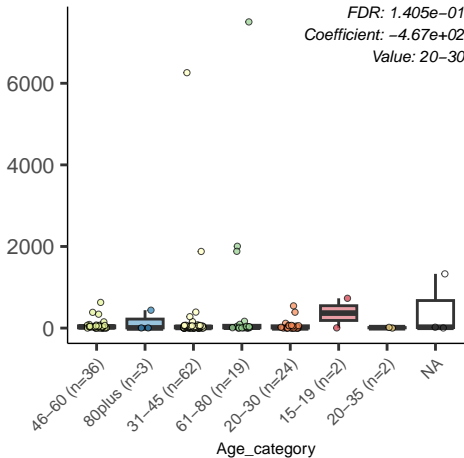

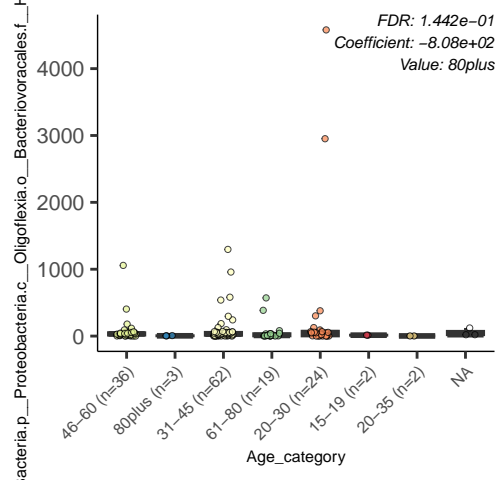



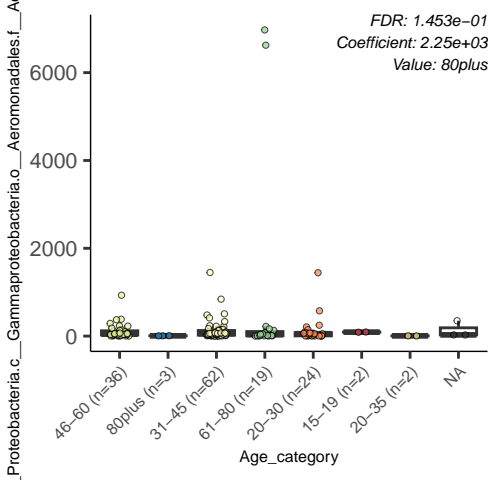

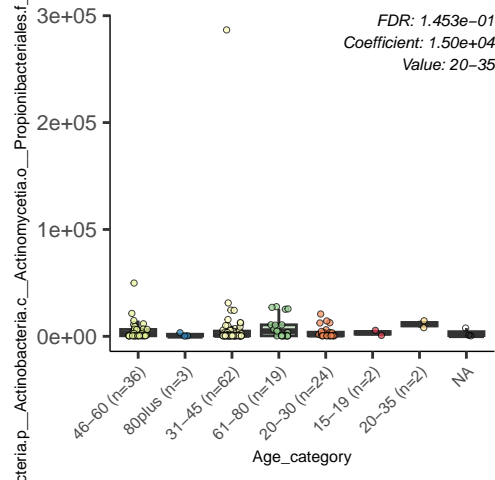



osilonproteobacteria.o\_\_Campylobacterales.f\_\_Campylobacteraceae

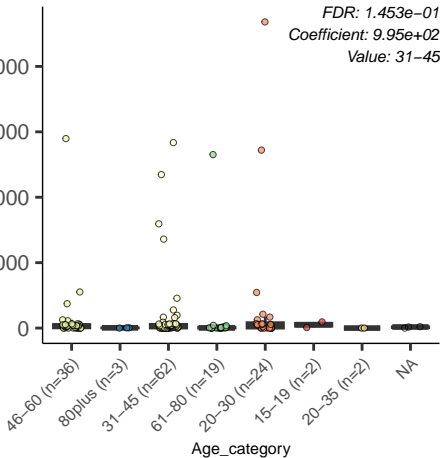

bacteria.c\_\_Gammaproteobacteria.o\_\_Alteromonadales.f\_\_Pseudo

FDR: 1.462e-01  
Coefficient: -5.50e+03  
Value: 46-60

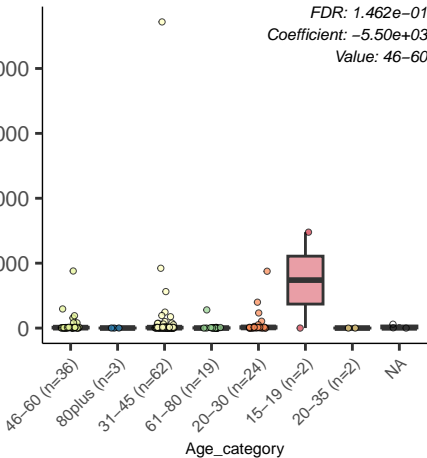

Bacteria.p\_\_Firmicutes.c\_\_Clostridia.o\_\_Eubacteriales.f\_\_Clostridia

FDR:  $1.471\text{e-}01$   
Coefficient:  $-1.14\text{e}+03$   
Value: 20-35

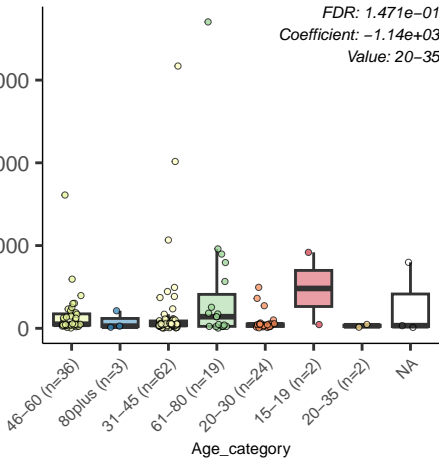

FDR:  $1.471\text{e-}01$   
Coefficient:  $-1.14\text{e}+03$   
Value: 20-35

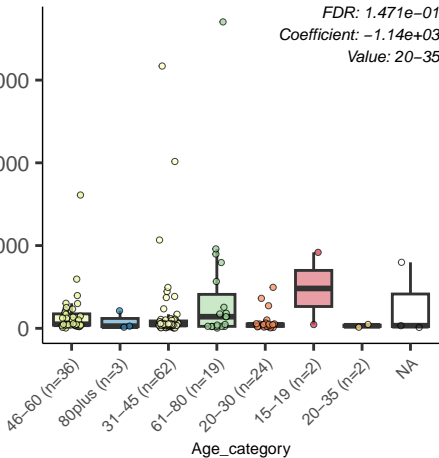

Bacteria.p\_\_Proteobacteria.c\_\_Betaproteobacteria.o\_\_Burkholder

FDR:  $1.476e-01$   
Coefficient:  $-5.65e+02$   
Value: 20-30

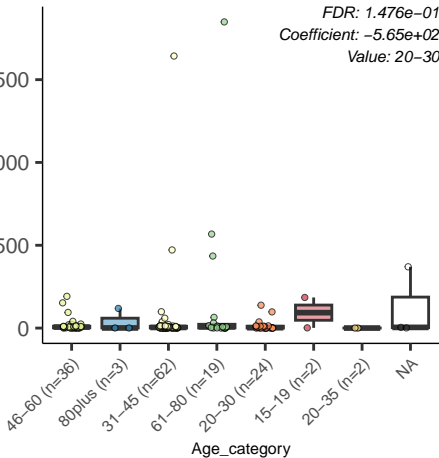

Proteobacteria.c\_\_Betaproteobacteria.o\_\_Burkholderiales.g\_\_Aquini

FDR: 1.476e-01  
Coefficient: -5.65e+02  
Value: 20-30

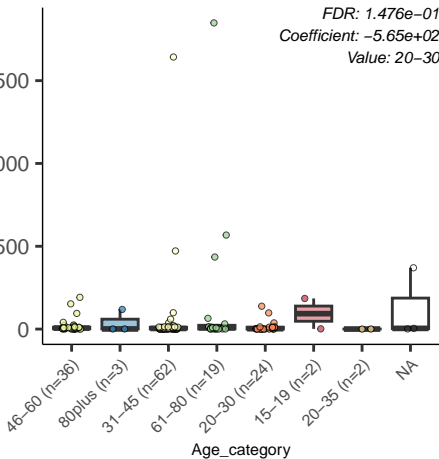

Actinomycetia.o\_\_Corynebacteriales.f\_\_Corynebacteriaceae.g\_\_C

FDR: 1.484e-01  
Coefficient: 7.85e+03  
Value: 61-80

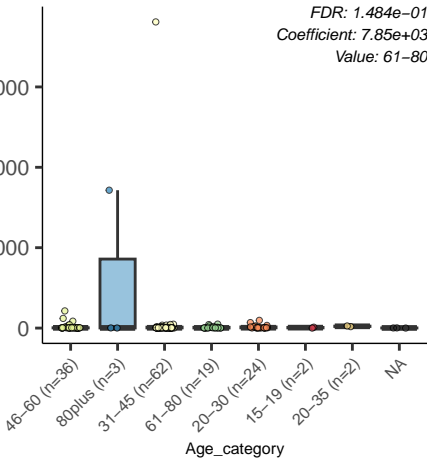

oebacteria.c\_\_Gammaproteobacteria.o\_\_Oceanospirillales.f\_\_Halor

FDR:  $1.489\text{e-}01$   
Coefficient:  $-1.25\text{e}+02$   
Value: 20-35

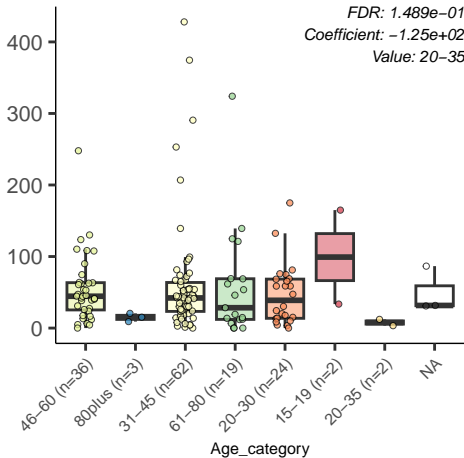



maproteobacteria.o\_\_Oceanospirillales.f\_\_Halomonadaceae.g\_\_Ca

FDR: 1.489e-01  
Coefficient: -1.25e+02  
Value: 20-35

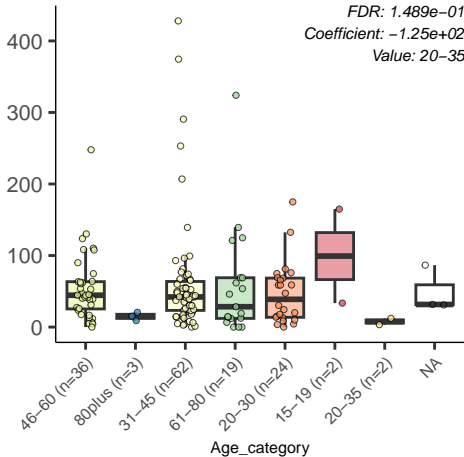

icutes.c\_\_Bacilli.o\_\_Lactobacillales.f\_\_Streptococcaceae.g\_\_Strept

*FDR: 1.496e-01*  
*Coefficient: -6.21e+03*  
*Value: 31-45*

60000

40000

20000

0

Age\_category

46-60 (n=36)

80plus (n=3)

31-45 (n=62)

61-80 (n=19)

20-30 (n=24)

15-19 (n=2)

20-35 (n=2)

NA

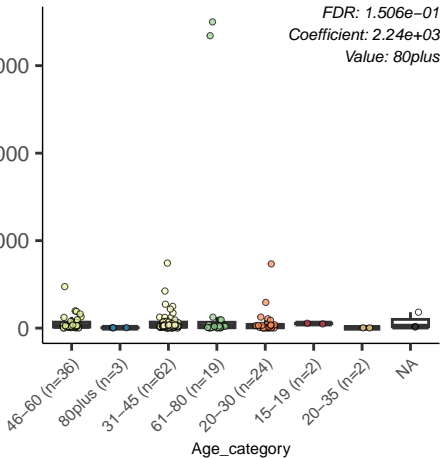

d\_\_Bacteria.p\_\_Proteobacteria.c\_\_Gammaproteobacteria.o\_\_Ae

FDR: 1.513e-01  
Coefficient: 2.29e+03  
Value: 80plus

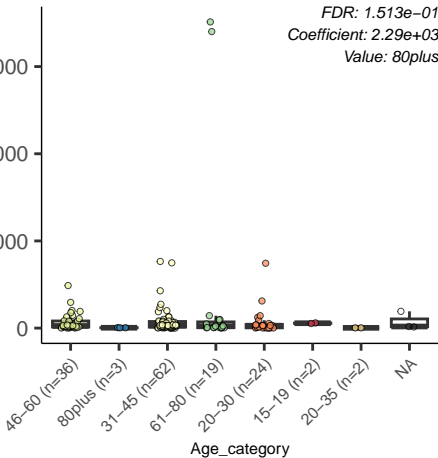

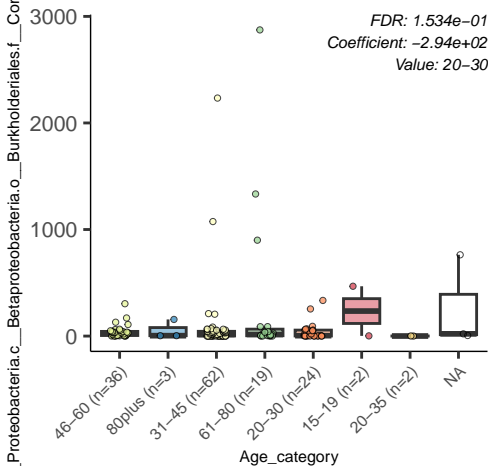

ia.p\_\_Proteobacteria.c\_\_Alphaproteobacteria.o\_\_Hyphomicrobiales

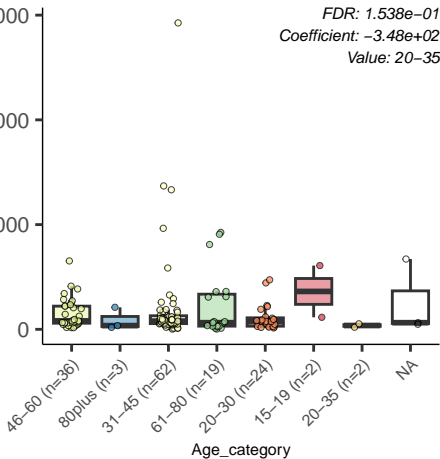

ria.c\_\_Alphaproteobacteria.o\_\_Hyphomicrobiales.g\_\_Candidatus.H

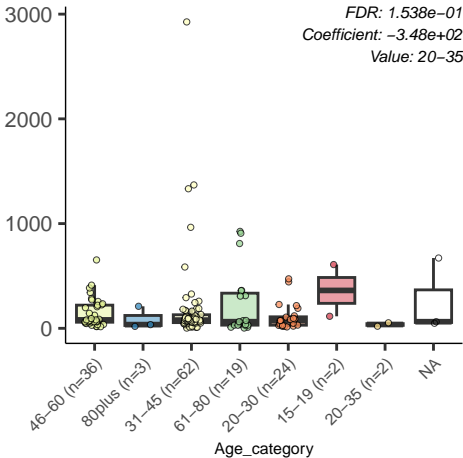

bacteria.p\_\_Proteobacteria.c\_\_Betaproteobacteria.o\_\_Burkholderia

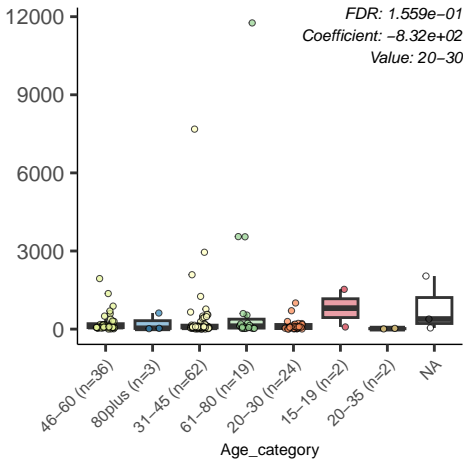



bacteria.c\_\_Gammaproteobacteria.o\_\_Alteromonadales.f\_\_Pseudo

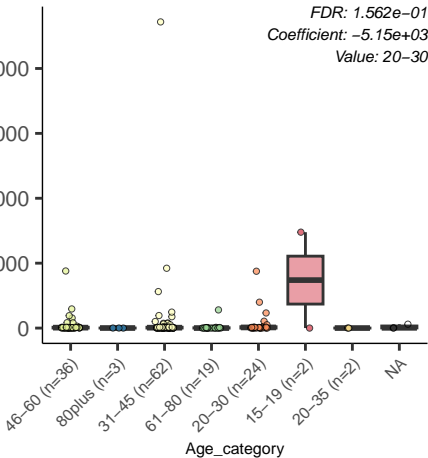

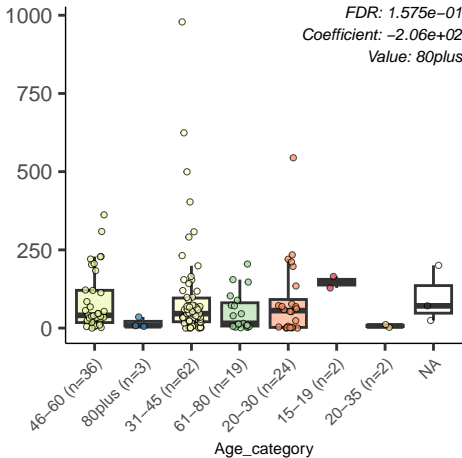

ammaproteobacteria.o\_\_Alteromonadales.f\_\_Pseudoalteromonada

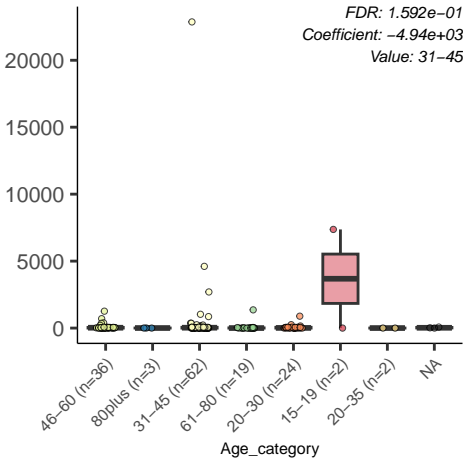

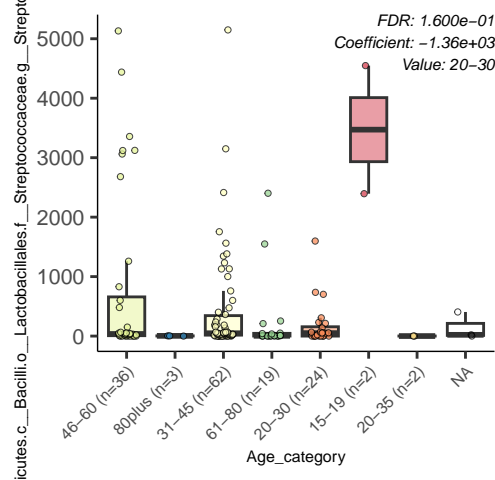

obacteria.c\_\_Betaproteobacteria.o\_\_Burkholderiales.f\_\_Comamonad

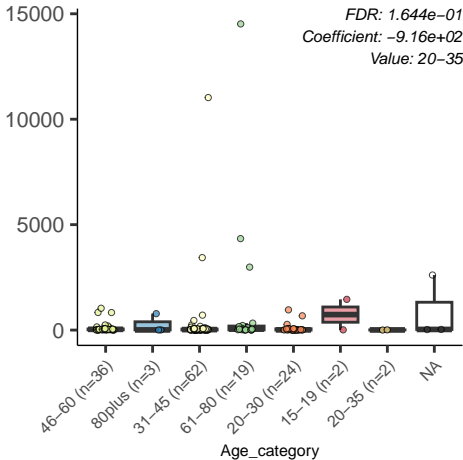

proteobacteria.o\_\_Burkholderiales.f\_\_Comamonadaceae.g\_\_Candido

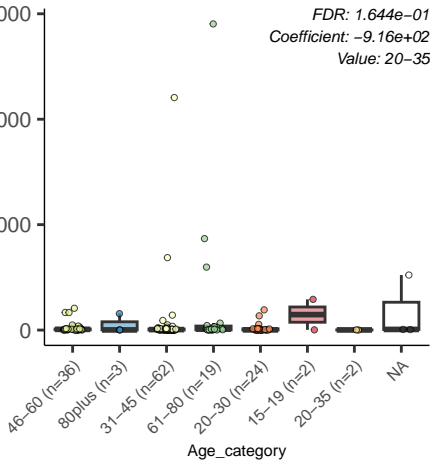

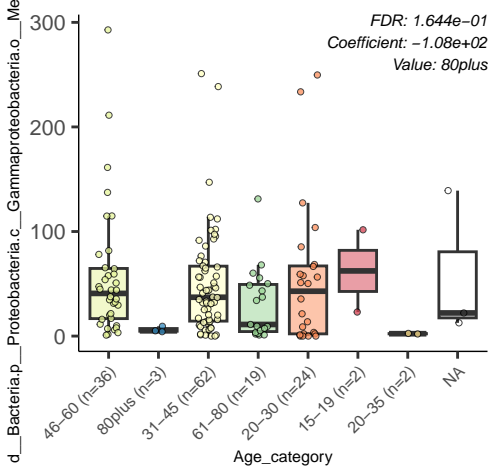

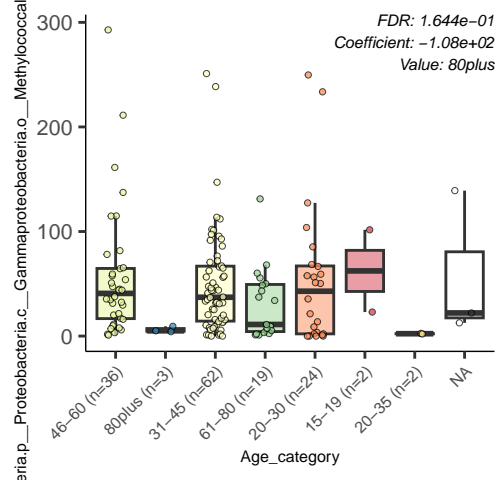



ammaproteobacteria.o\_\_Alteromonadales.f\_\_Pseudoalteromonada

FDR:  $1.644e-01$   
Coefficient:  $-5.58e+03$   
Value: 61-80

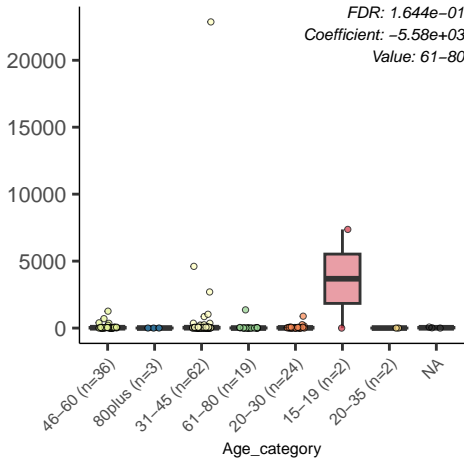

ria.c\_\_Actinomycetia.o\_\_Propionibacteriales.f\_\_Propionibacteriaceae

FDR: 1.644e-01  
Coefficient: 1.04e+04  
Value: 20-35

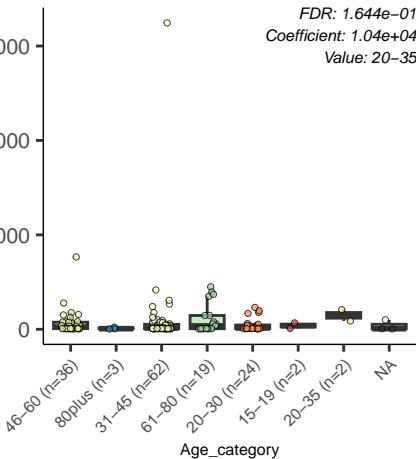

ia.p\_\_Bacteroidetes.c\_\_Flavobacteriia.o\_\_Flavobacteriales.f\_\_Flavo

*FDR: 1.645e-01*  
*Coefficient: -1.80e+02*  
*Value: 20-30*

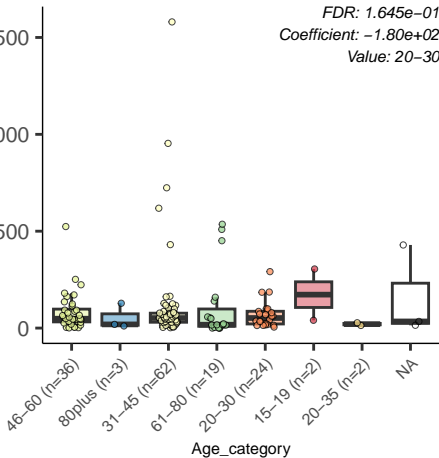

cteroidetes.c\_\_Flavobacteriia.o\_\_Flavobacteriales.f\_\_Flavobacteriia

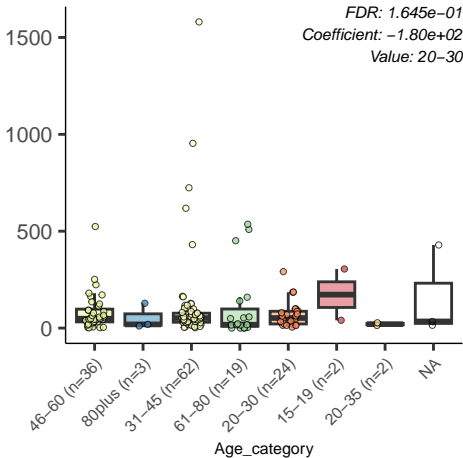

icutes.c\_\_Tissierellia.o\_\_Tissierellales.f\_\_Peptoniphilaceae.g\_\_Ana

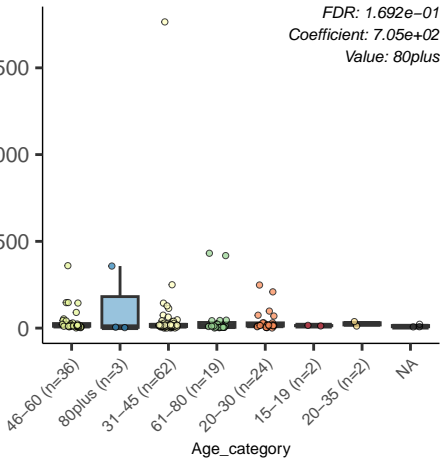

Bacteroidetes.c\_\_Spingobacteriia.o\_\_Spingobacteriales.f\_\_Sph

FDR: 1.713e-01  
Coefficient: 3.75e+02  
Value: 20-30

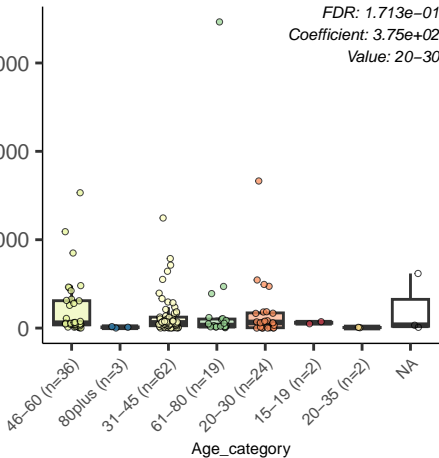

icutes.c\_\_Bacilli.o\_\_Lactobacillales.f\_\_Streptococcaceae.g\_\_Strept

FDR: 1.714e-01  
Coefficient: -6.83e+03  
Value: 61-80

60000

40000

20000

0

46-60 (n=36)

80plus (n=3)

31-45 (n=62)

61-80 (n=19)

20-30 (n=24)

15-19 (n=2)

20-35 (n=2)

NA

Age\_category

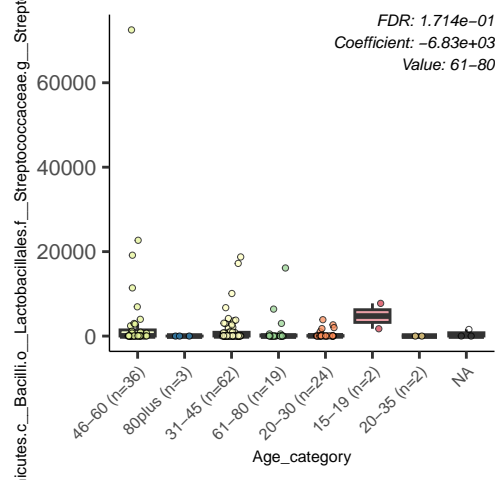





maproteobacteria.o\_\_Oceanospirillales.f\_\_Halomonadaceae.g\_\_Ca

FDR:  $1.722e-01$   
Coefficient:  $-1.01e+02$   
Value: 20-30

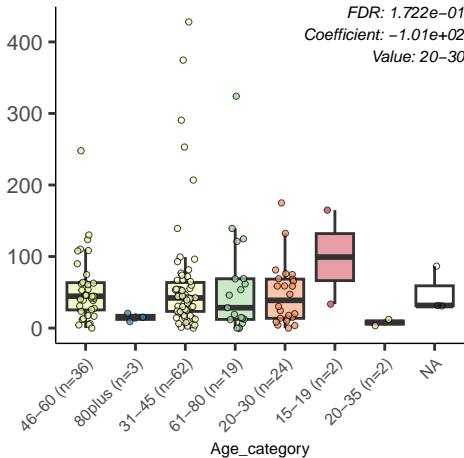

Bacteria.p\_Actinobacteria.c\_Actinomycetia.o\_Micrococcales.f\_C

FDR: 1.729e-01  
Coefficient: -2.37e+02  
Value: 80plus

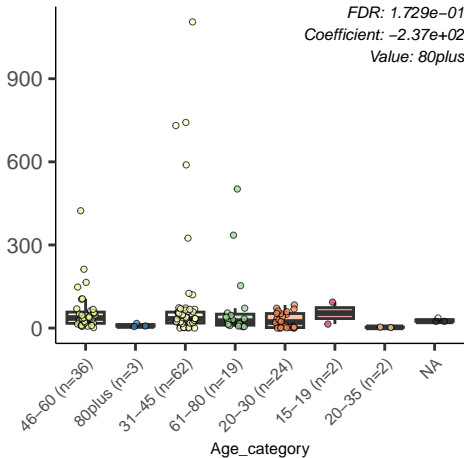

obacteria.c\_\_Betaproteobacteria.o\_\_Burkholderiales.f\_\_Comamonad

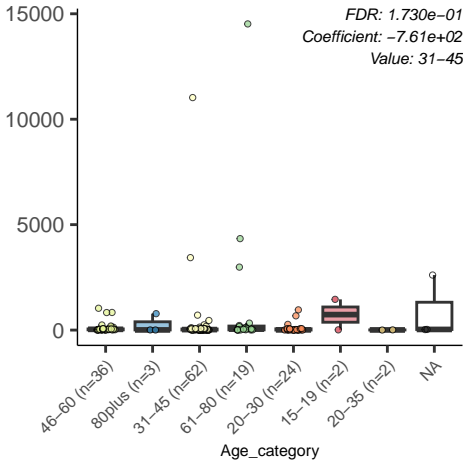

proteobacteria.o\_\_Burkholderiales.f\_\_Comamonadaceae.g\_\_Candido

FDR: 1.730e-01  
Coefficient: -7.61e+02  
Value: 31-45

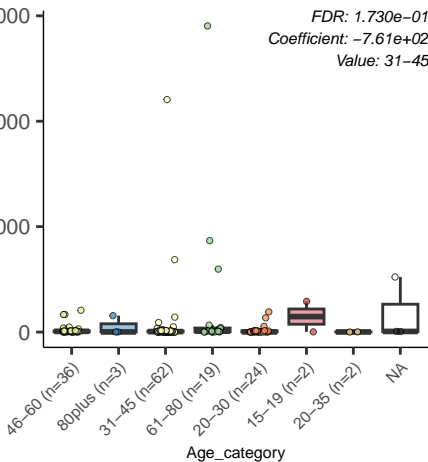

bacteria.p\_\_Proteobacteria.c\_\_Alphaproteobacteria.o\_\_Rickettsiales

FDR:  $1.730e-01$   
Coefficient:  $-3.06e+02$   
Value: 31-45

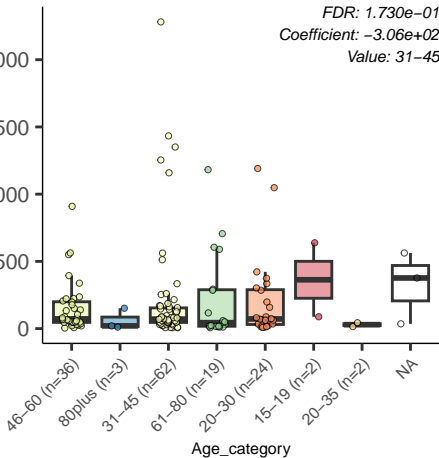

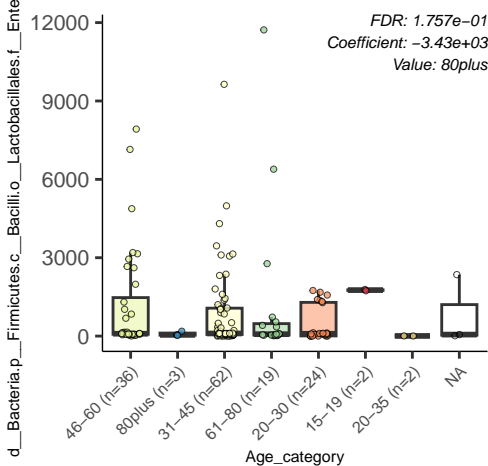

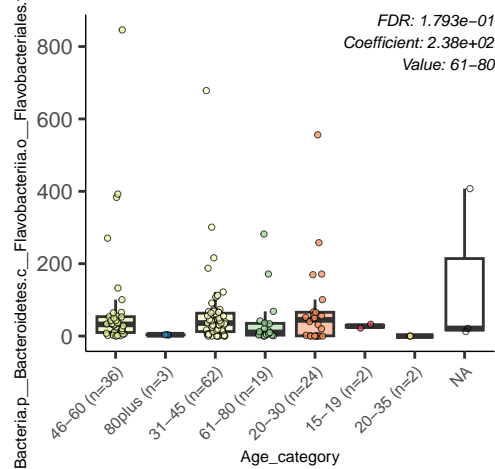

\_\_Epsilonproteobacteria.o\_\_Campylobacterales.f\_\_Campylobacter

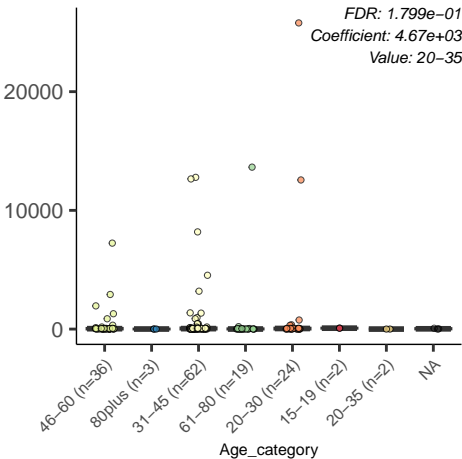



bacteria.c\_\_Alphaproteobacteria.o\_\_Hyphomicrobiales.f\_\_Rhizobia

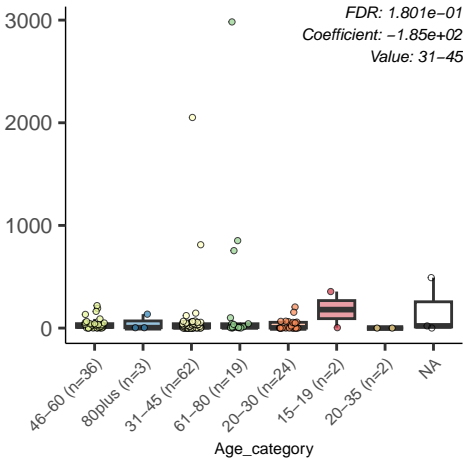

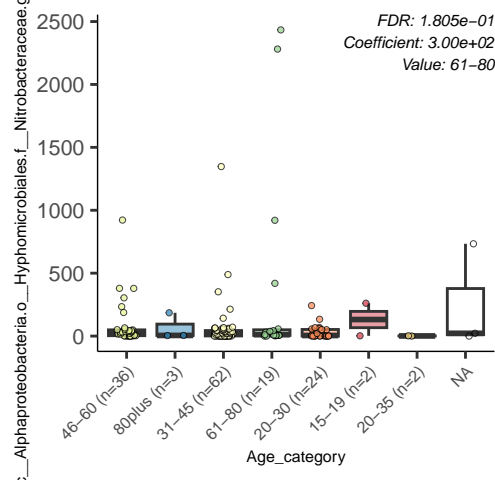

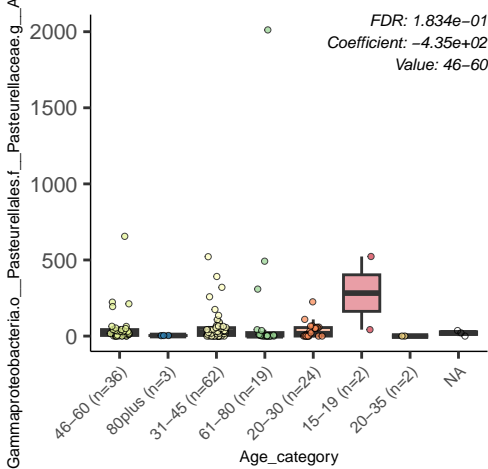

acteria.p\_Firmicutes.c\_Bacilli.o\_Lactobacillales.f\_Enterococcae

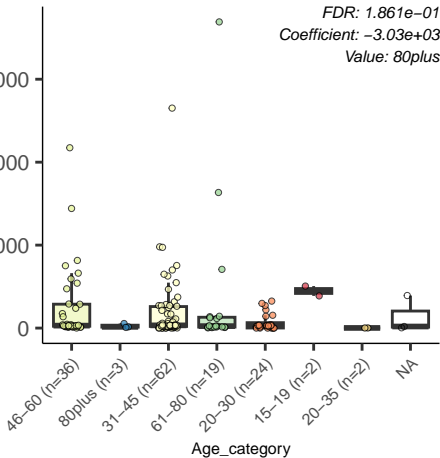

phaproteobacteria.o\_\_Rickettsiales.f\_\_Rickettsiaceae.g\_\_Rickettsia

FDR:  $1.864e-01$   
Coefficient:  $-9.19e+01$   
Value: 20-30

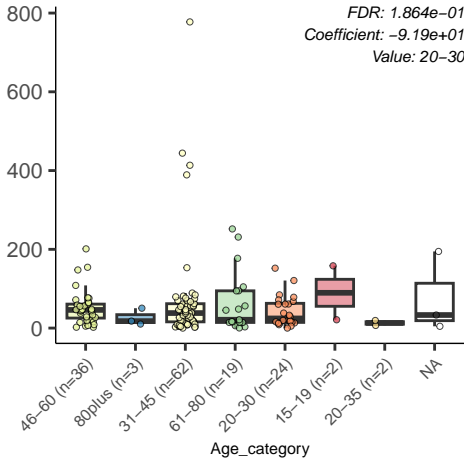

ia.p\_\_Proteobacteria.c\_\_Betaproteobacteria.o\_\_Burkholderiales.g

*FDR: 1.867e-01*  
*Coefficient: -8.25e+01*  
*Value: 20-30*

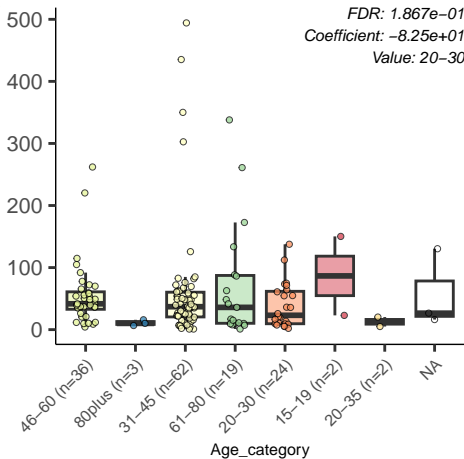

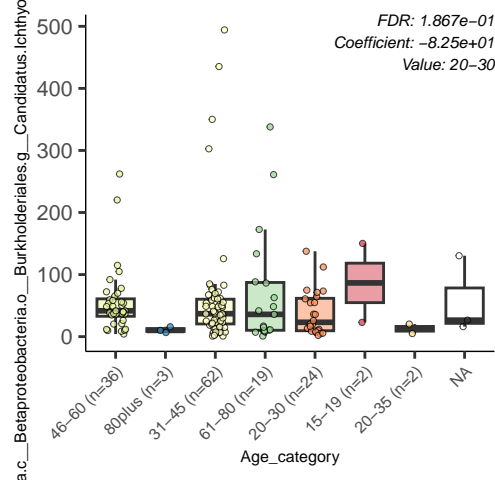

eria.p\_\_Firmicutes.c\_\_Clostridia.o\_\_Eubacteriales.f\_\_Peptococcaceae

FDR: 1.869e-01  
Coefficient: -1.36e+03  
Value: 80plus

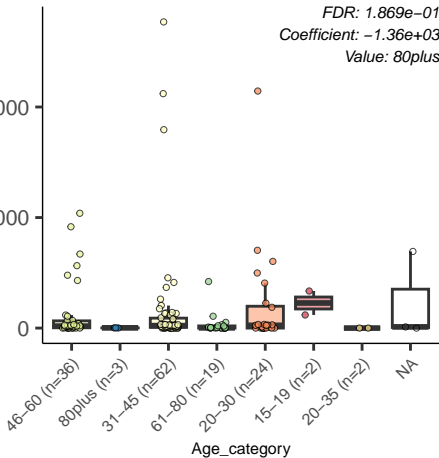



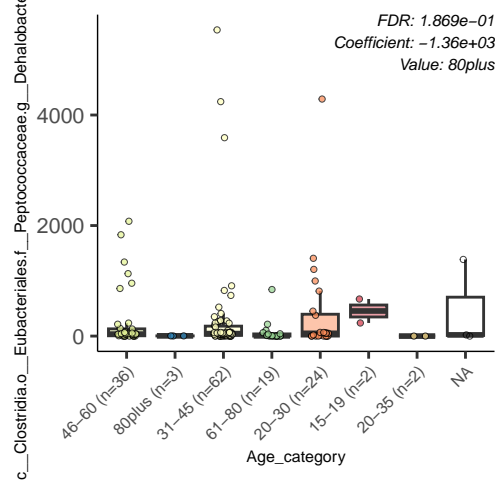

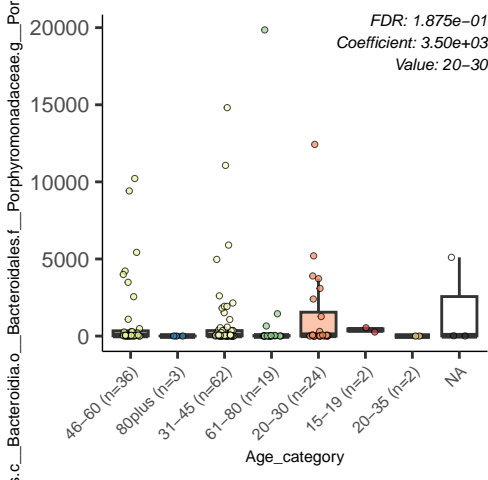

eria.p\_\_Firmicutes.c\_\_Bacilli.o\_\_Lactobacillales.f\_\_Lactobacillaceae

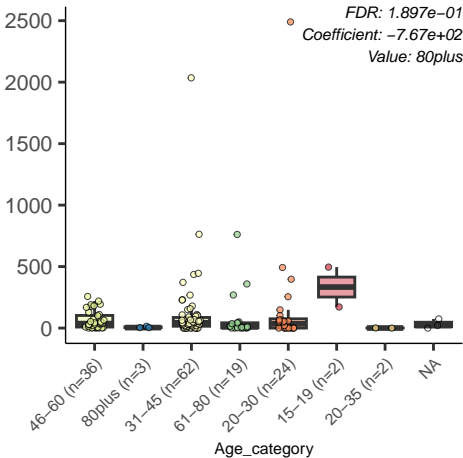

Bacteria.p\_\_Proteobacteria.c\_\_Betaproteobacteria.o\_\_Burkholder

FDR: 1.898e-01  
Coefficient: -4.37e+02  
Value: 20-35

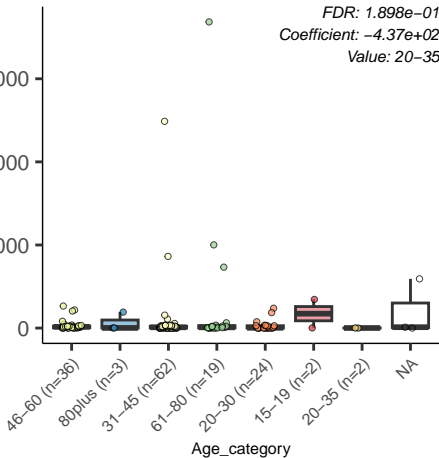

Proteobacteria.c\_\_Betaproteobacteria.o\_\_Burkholderiales.g\_\_Lept

FDR: 1.898e-01  
Coefficient: -4.37e+02  
Value: 20-35

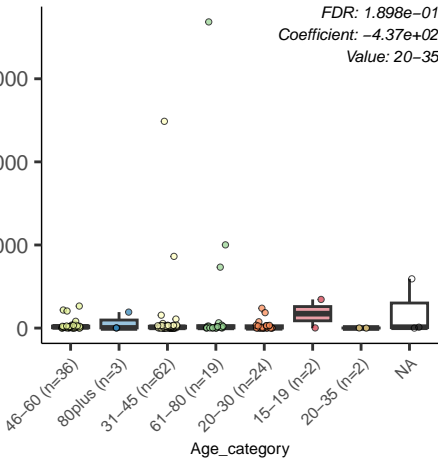

d\_\_Bacteria.p\_\_Cyanobacteria.o\_\_Synechococcales.f\_\_Synech

FDR:  $1.901e-01$   
Coefficient:  $-5.12e+02$   
Value: 20-35

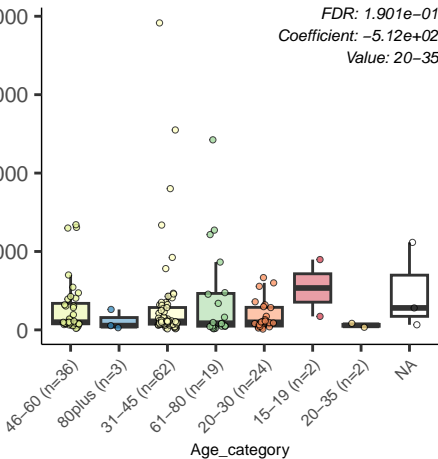

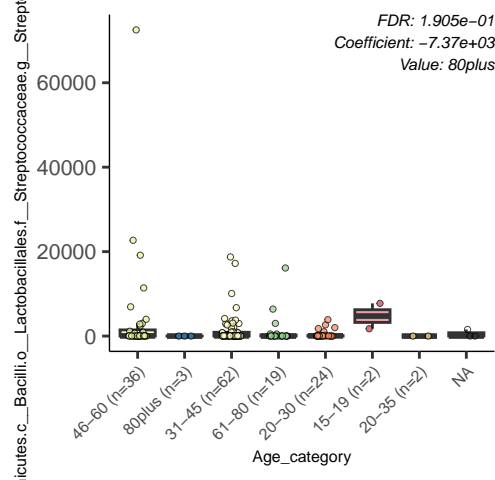

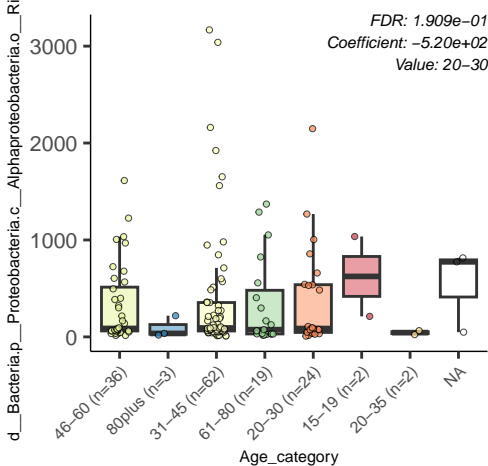



bacteria.c\_\_Gammaproteobacteria.o\_\_Alteromonadales.f\_\_Pseudo

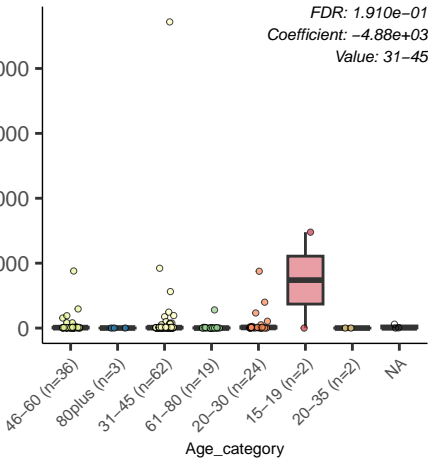

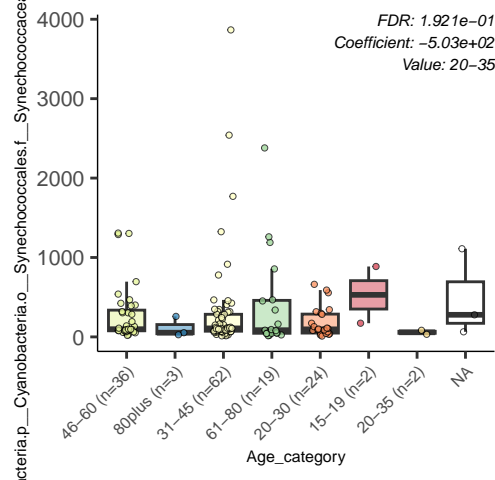

.p\_\_Proteobacteria.c\_\_Alphaproteobacteria.o\_\_Hyphomicrobiales.f

FDR: 1.931e-01  
Coefficient: -1.81e+02  
Value: 31-45

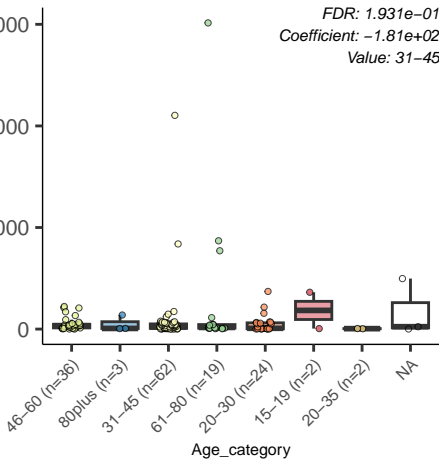

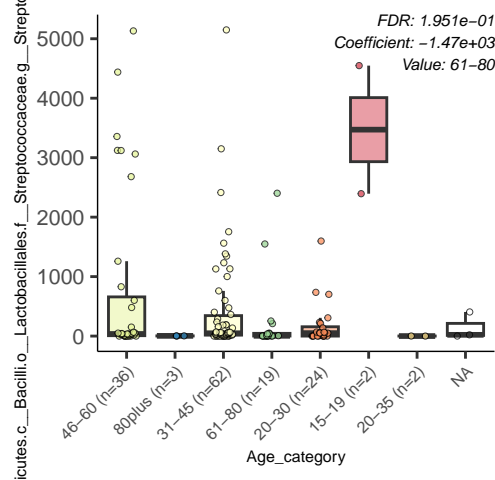

l\_Bacteria.p\_\_Proteobacteria.c\_\_Betaproteobacteria.o\_\_Burkholder

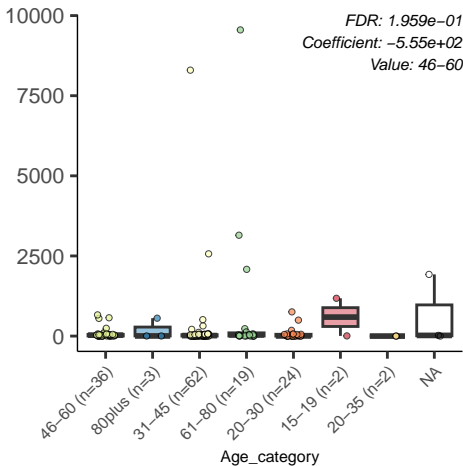

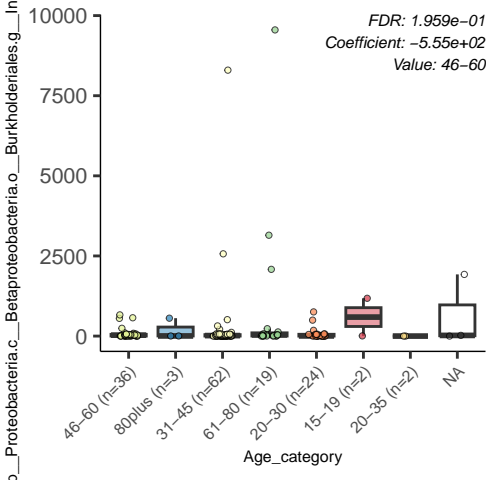

Bacteria.p\_\_Bacteroidetes.c\_\_Flavobacteriia.o\_\_Flavobacteriales.f

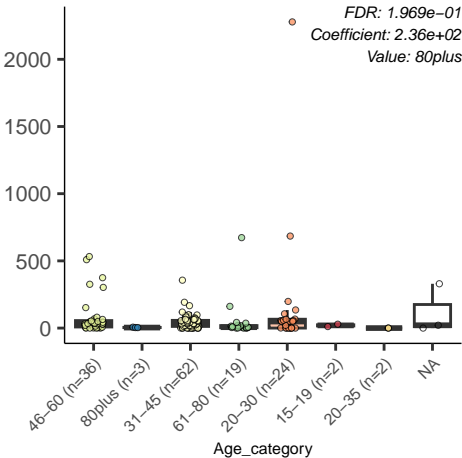

phaproteobacteria.o\_\_Rickettsiales.f\_\_Rickettsiaceae.g\_\_Rickettsia

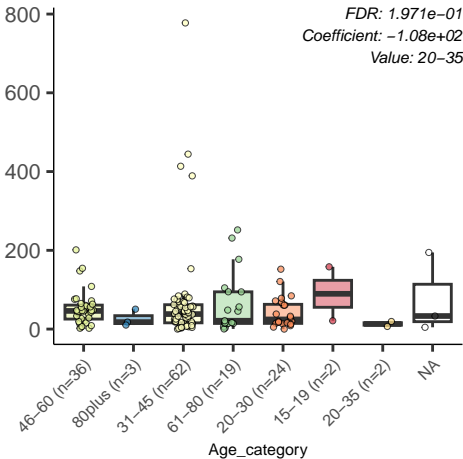



Proteobacteria.c\_\_Betaproteobacteria.o\_\_Burkholderiales.f\_\_Con

FDR:  $1.984e-01$   
Coefficient:  $-9.51e+01$   
Value: 20-30

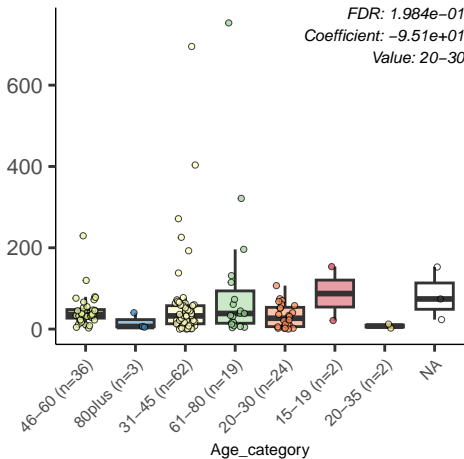

bacteria.p\_\_Proteobacteria.c\_\_Alphaproteobacteria.o\_\_Rickettsiales

FDR:  $1.986e-01$   
Coefficient:  $-3.49e+02$   
Value: 20-35

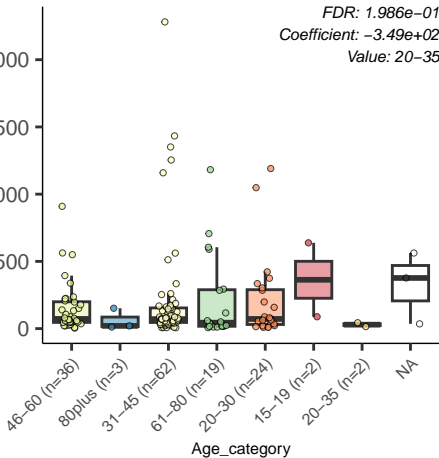

d\_\_Bacteria.p\_\_Proteobacteria.c\_\_Alphaproteobacteria.o\_R

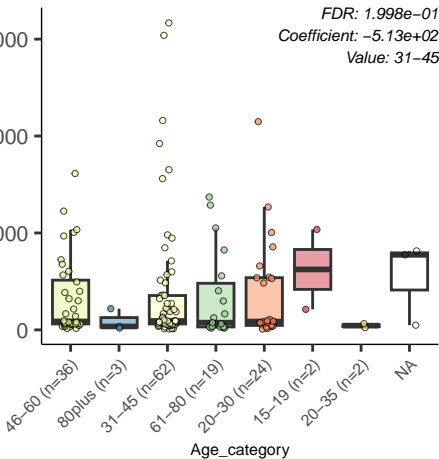

ia.p\_\_Proteobacteria.c\_\_Betaproteobacteria.o\_\_Burkholderiales.g

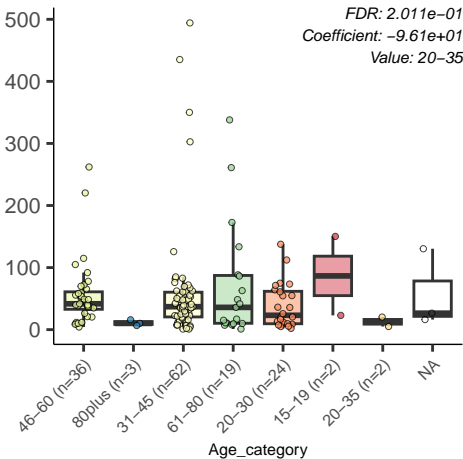

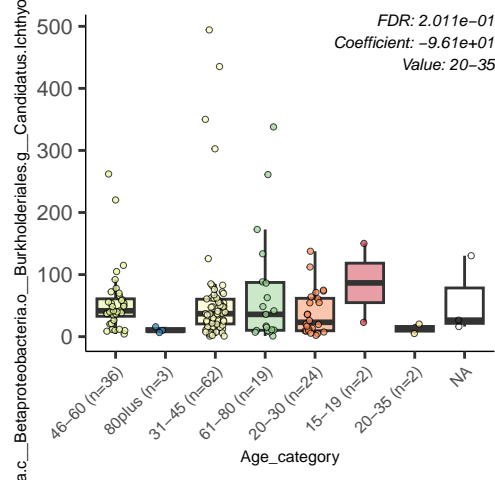

Firmicutes.c\_\_Clostridia.o\_\_Eubacteriales.f\_\_Clostridiaceae.g\_\_C

FDR: 2.048e-01  
Coefficient: -3.53e+03  
Value: 46-60

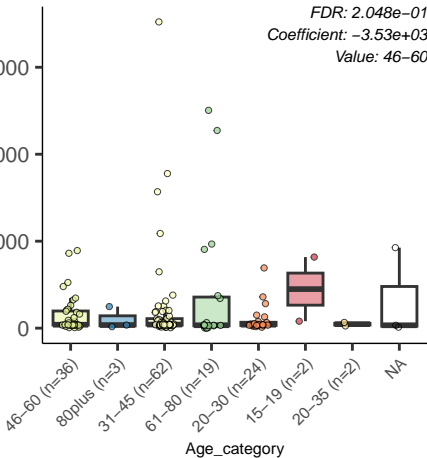

ia.c\_\_Gammaproteobacteria.o\_\_Pasteurellales.f\_\_Pasteurellaceae.

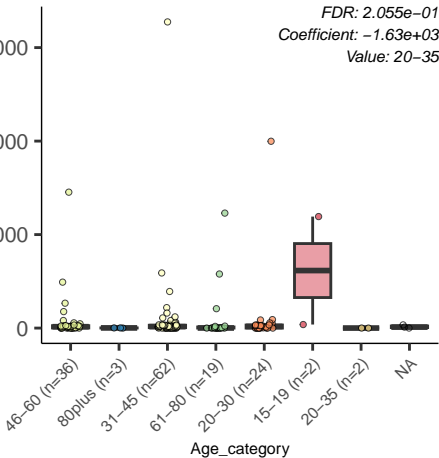

terial.c\_\_Gammaproteobacteria.o\_\_Pasteurellales.f\_\_Pasteurellaceae

*FDR: 2.056e-01*  
*Coefficient: -8.51e+03*  
*Value: 31-45*

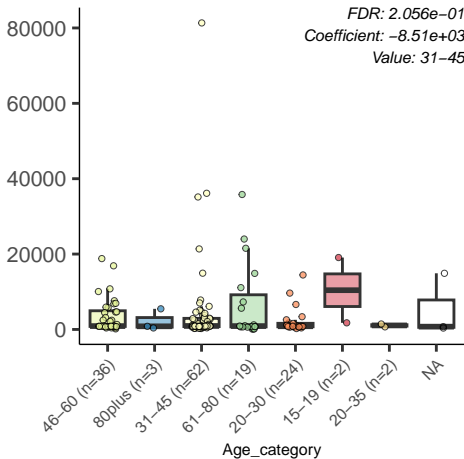



d\_\_Bacteria.p\_\_Cyanobacteria.o\_\_Oscillatoriales.f\_\_Oscillatoria

FDR: 2.071e-01  
Coefficient: -2.03e+02  
Value: 80plus

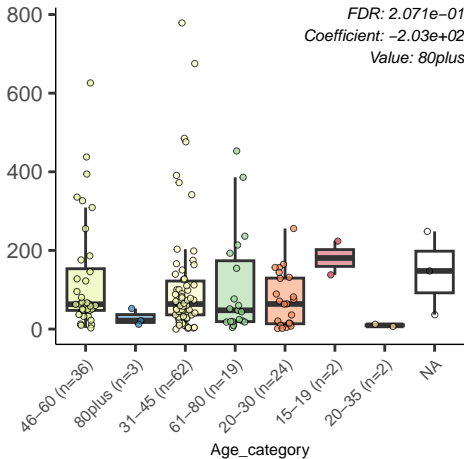

Gamma\_\_Gammaproteobacteria.o\_\_Cardiobacteriales.f\_\_Cardiobacteriaceae

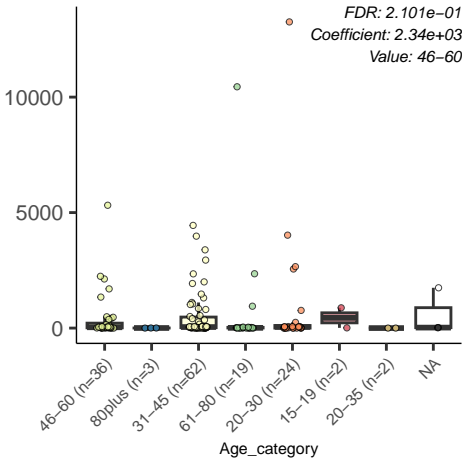

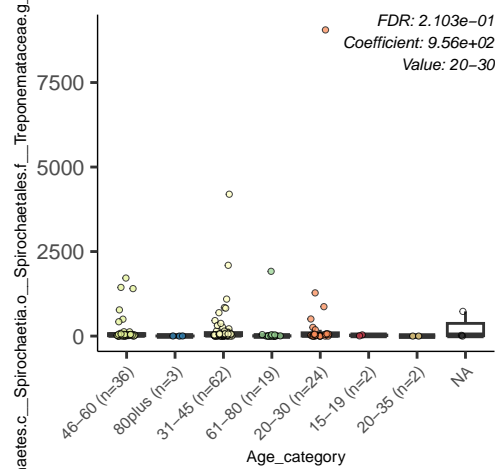

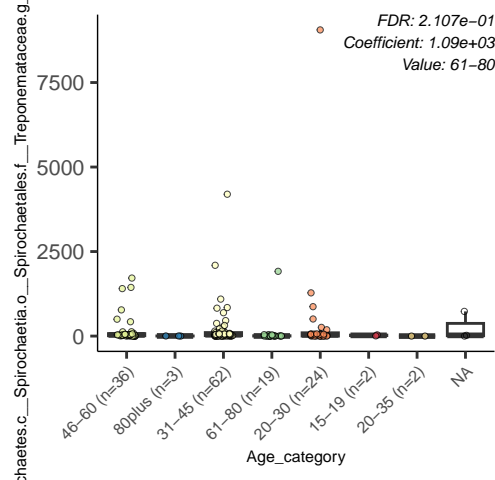

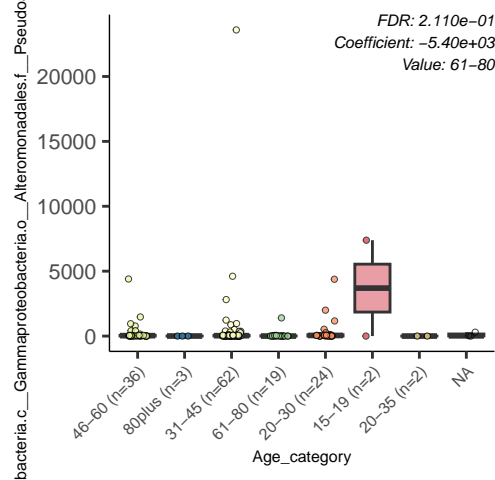

Bacteroidetes.c\_\_Spingobacteriia.o\_\_Spingobacteriales.f\_\_Sphingobacterium

FDR: 2.110e-01  
Coefficient: 3.71e+02  
Value: 46-60

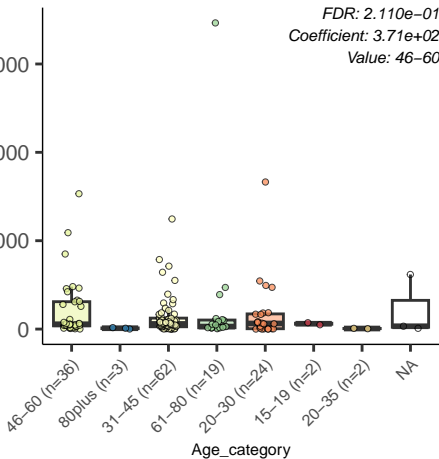

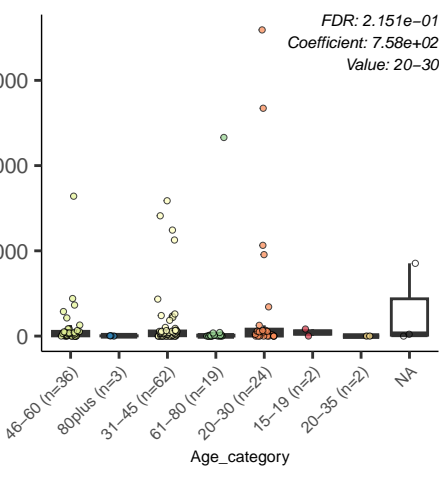

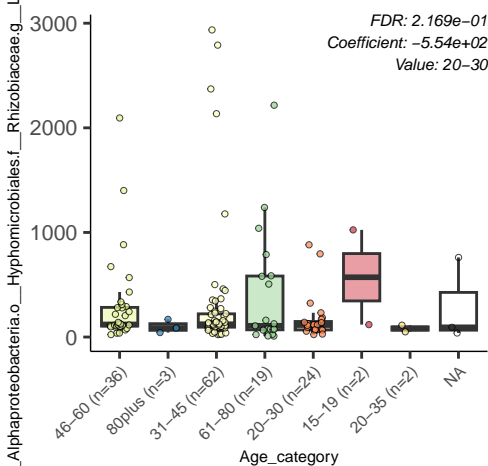



Gamma\_\_Gammaproteobacteria.o\_\_Pasteurellales.f\_\_Pasteurellaceae.g\_\_A

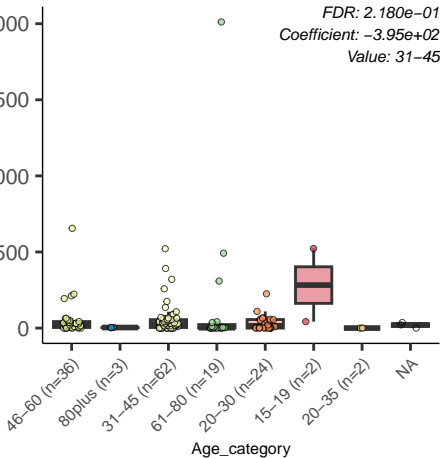

d\_\_Bacteria.p\_\_Bacteroidetes.c\_\_Chitinophagia

FDR: 2.191e-01  
Coefficient: 1.18e+03  
Value: 46-60

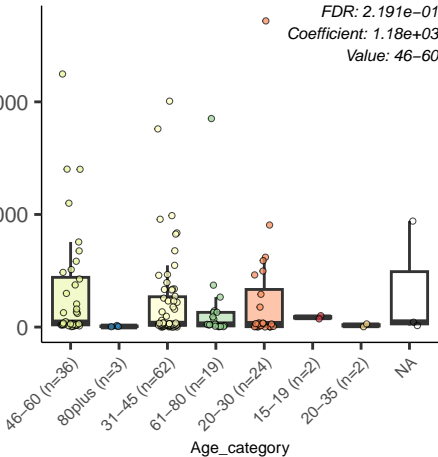

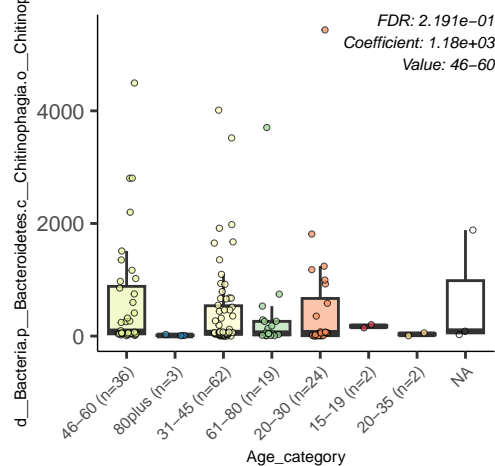

Bacteria.p\_\_Bacteroidetes.c\_\_Chitinophagia.o\_\_Chitinophagales.f

FDR: 2.191e-01  
Coefficient: 1.18e+03  
Value: 46-60

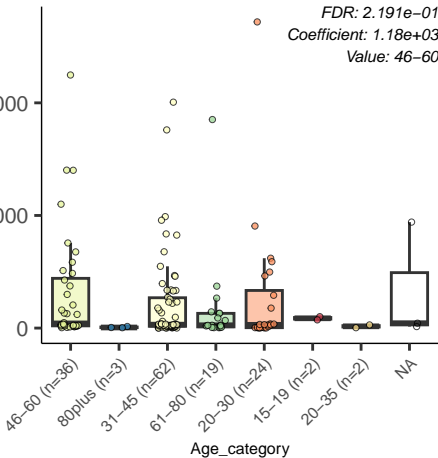

ia.p\_\_Actinobacteria.c\_\_Actinomycetia.o\_\_Micrococcales.f\_\_Micro

*FDR: 2.205e-01*  
*Coefficient: 2.80e+03*  
*Value: 61-80*

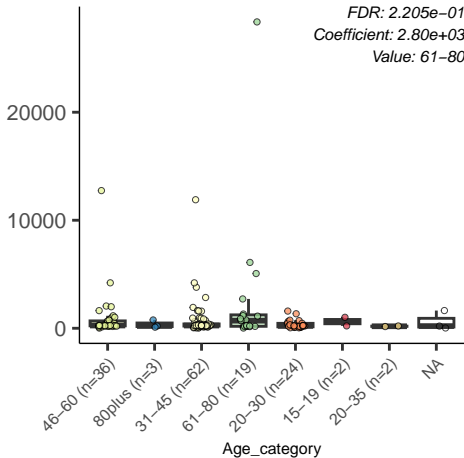



Flavobacteriia.o\_\_Flavobacteriales.f\_\_Flavobacteriaceae.g\_\_Cap

FDR: 2.252e-01  
Coefficient: 5.27e+02  
Value: 31-45

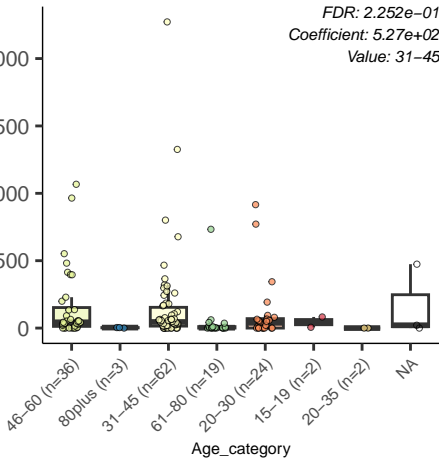

Bacteroidetes.c\_\_Spingobacteriia.o\_\_Spingobacteriales.f\_\_Sphingobacteriales

FDR: 2.253e-01  
Coefficient: 3.47e+02  
Value: 31-45

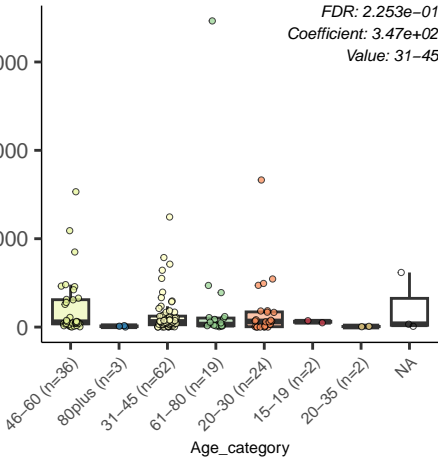



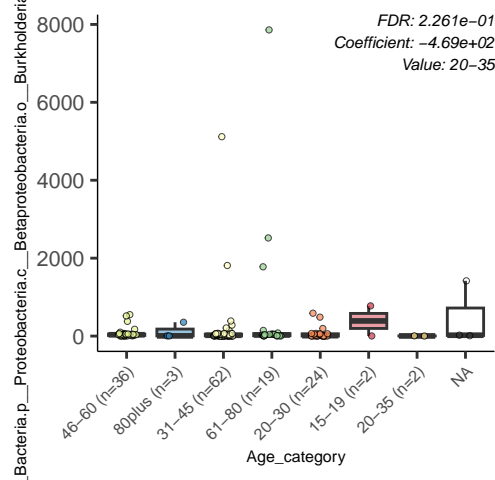

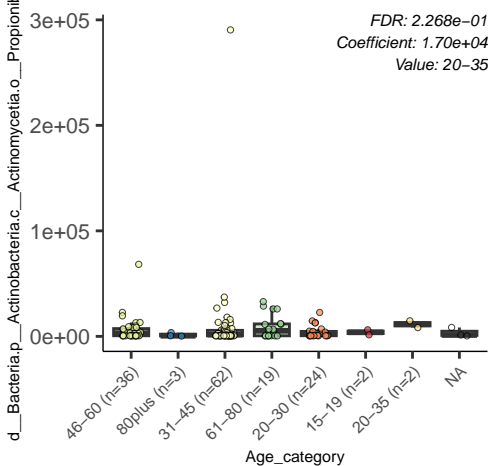

teobacteria.c\_\_Gammaproteobacteria.o\_\_Oceanospirillales.f\_\_Halor

FDR: 2.280e-01  
Coefficient: -9.31e+01  
Value: 31-45

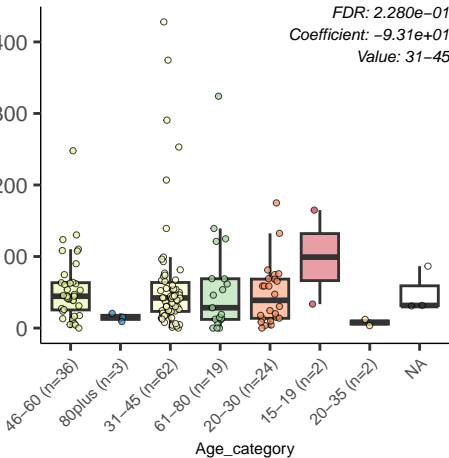

maproteobacteria.o\_\_Oceanospirillales.f\_\_Halomonadaceae.g\_\_Ca

FDR: 2.280e-01  
Coefficient: -9.31e+01  
Value: 31-45

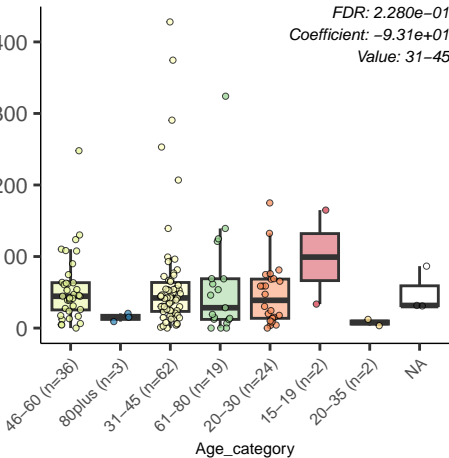

es.c\_\_Clostridia.o\_\_Eubacteriales.f\_\_Oscillospiraceae.g\_\_Faecalib

FDR: 2.291e-01  
Coefficient: 4.38e+02  
Value: 61-80

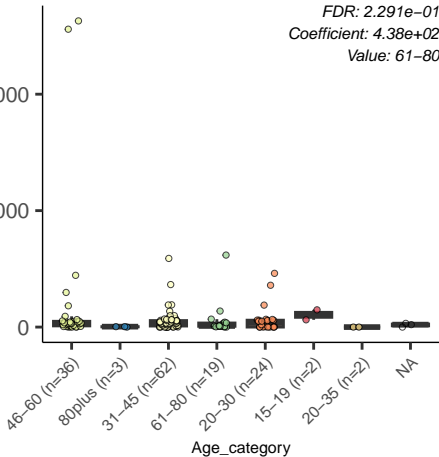

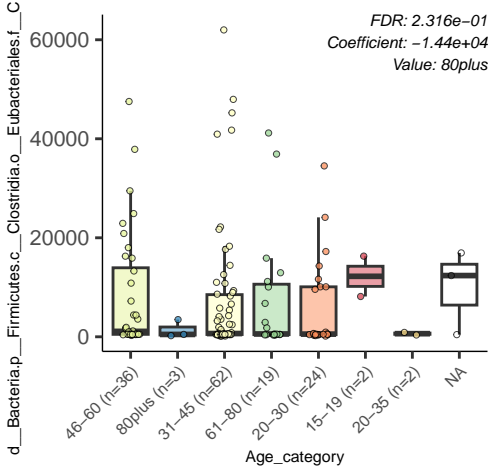

Gammaproteobacteria.o\_\_Pasteurellales.f\_\_Pasteurellaceae.g\_\_Ag

*FDR: 2.320e-01*  
*Coefficient: 1.50e+03*  
*Value: 80plus*

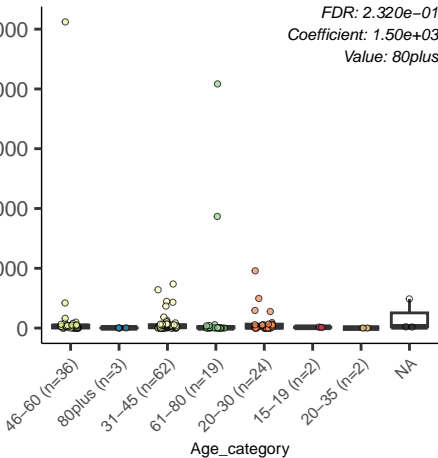

Bacteria.p\_\_Proteobacteria.c\_\_Betaproteobacteria.o\_\_Burkholder

FDR: 2.322e-01  
Coefficient: -3.46e+02  
Value: 31-45

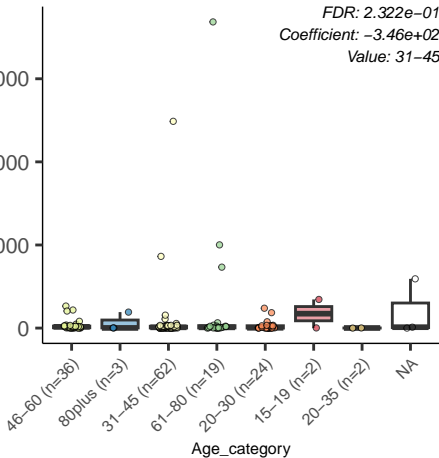



Proteobacteria.c\_\_Betaproteobacteria.o\_\_Burkholderiales.g\_\_Lept

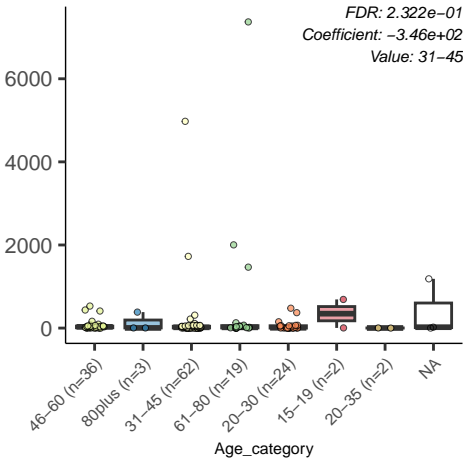

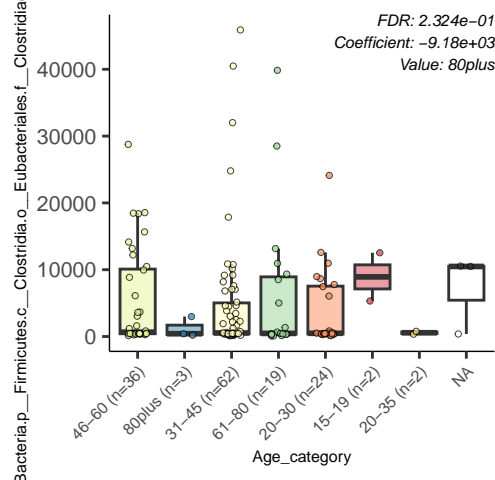

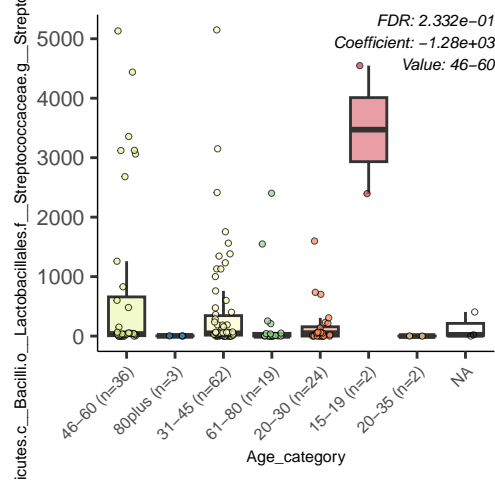

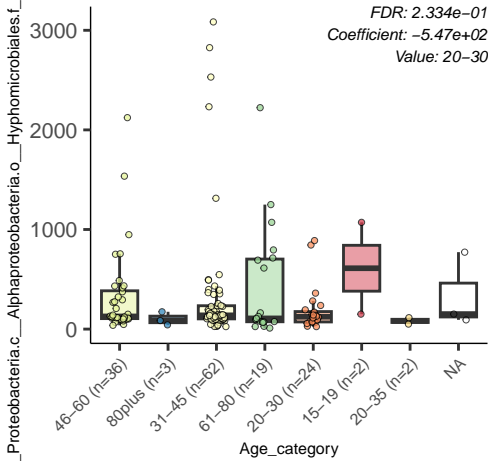

obacteria.c\_\_Betaproteobacteria.o\_\_Burkholderiales.f\_\_Comamonad

FDR: 2.349e-01  
Coefficient: -9.13e+02  
Value: 20-35

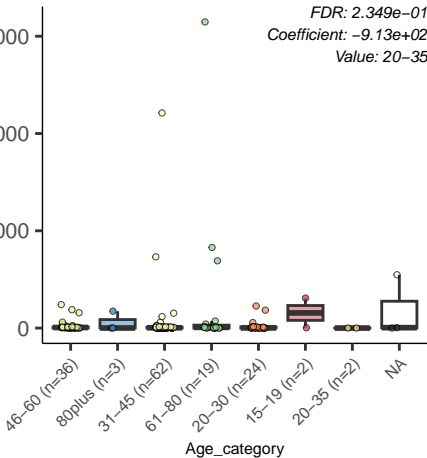

bacteria.o\_\_Synechococcales.f\_\_Synechococcaceae.g\_\_Synechococcus

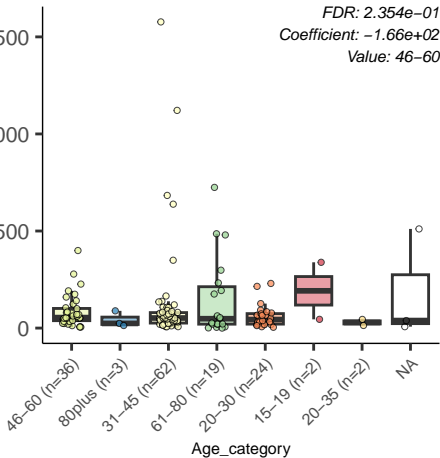

Proteobacteria.c\_\_Betaproteobacteria.o\_\_Burkholderiales.f\_\_Con

FDR:  $2.356e-01$   
Coefficient:  $-1.07e+02$   
Value: 20-35

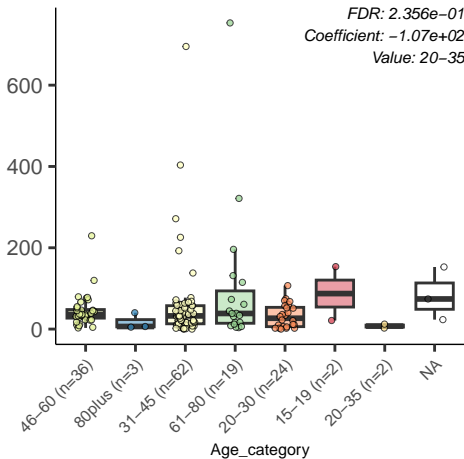

ammaproteobacteria.o\_\_Alteromonadales.f\_\_Pseudoalteromonada

FDR: 2.372e-01  
Coefficient: -5.58e+03  
Value: 80plus

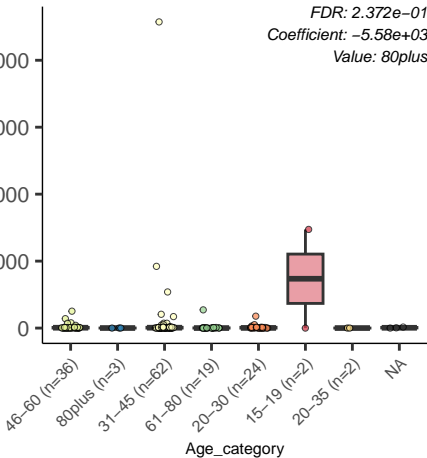



robacteria.c\_\_Betaproteobacteria.o\_\_Neisseriales.f\_\_Neisseriaceae

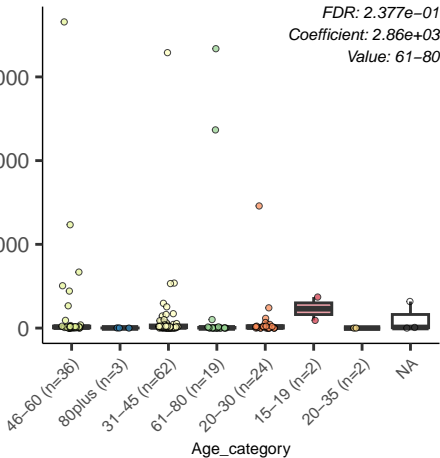

ia.p\_\_Bacteroidetes.c\_\_Flavobacteriia.o\_\_Flavobacteriales.f\_\_Flavo

FDR: 2.383e-01  
Coefficient: -1.92e+02  
Value: 20-35

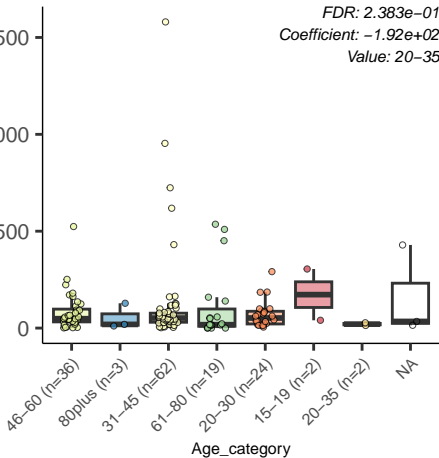

cteroidetes.c\_\_Flavobacteriia.o\_\_Flavobacteriales.f\_\_Flavobacteria

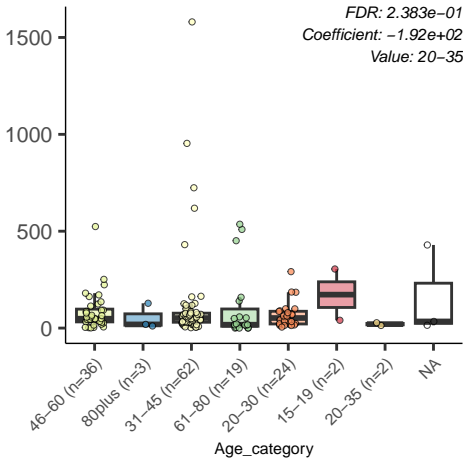

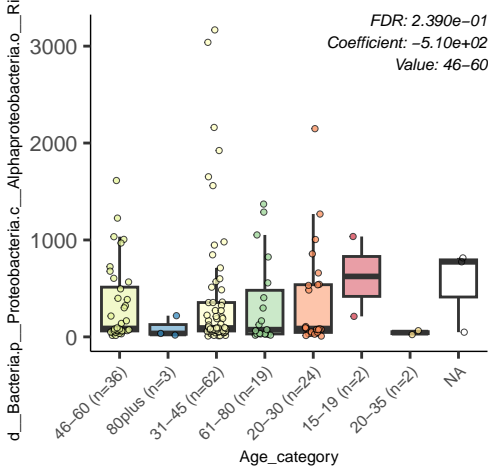

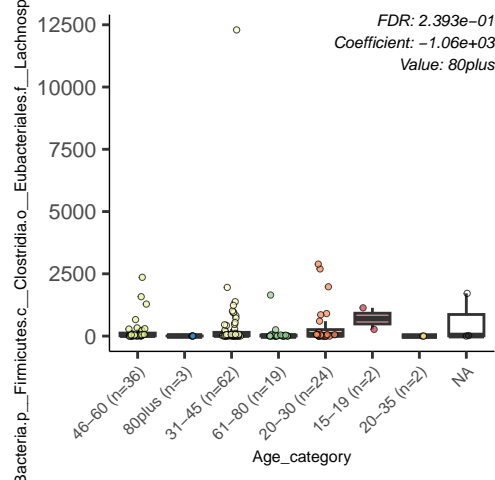

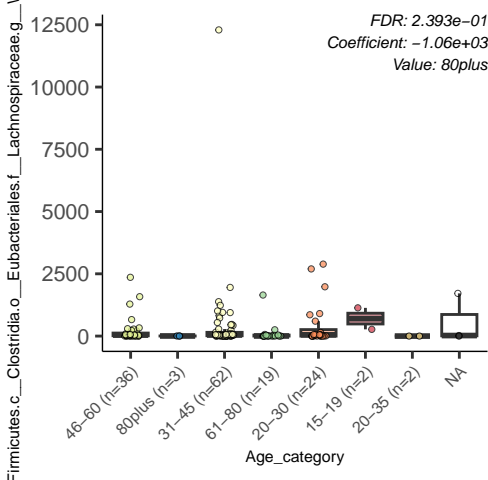

acteria.p\_\_Firmicutes.c\_\_Bacilli.o\_\_Lactobacillales.f\_\_Lactobacillaceae

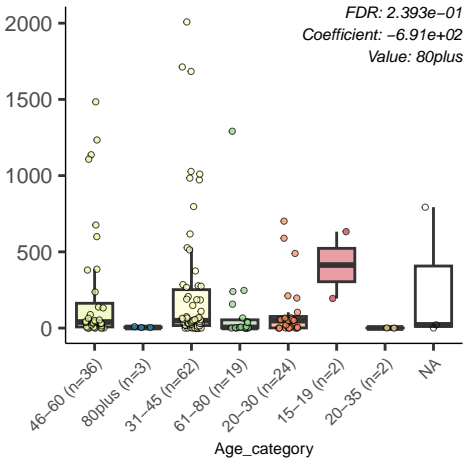

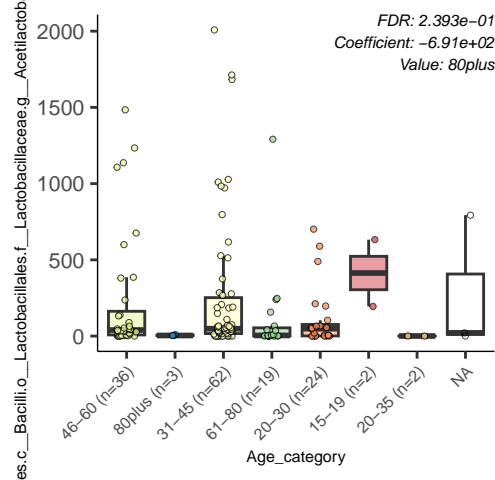



eria.p\_\_Firmicutes.c\_\_Bacilli.o\_\_Bacillales.f\_\_Bacillaceae.g\_\_Bacil

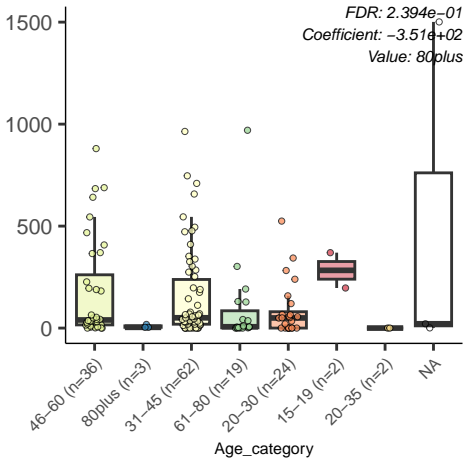

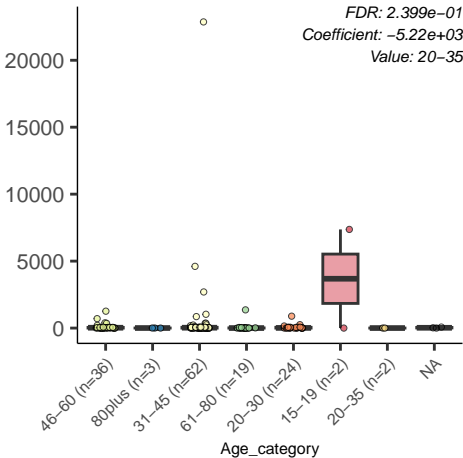



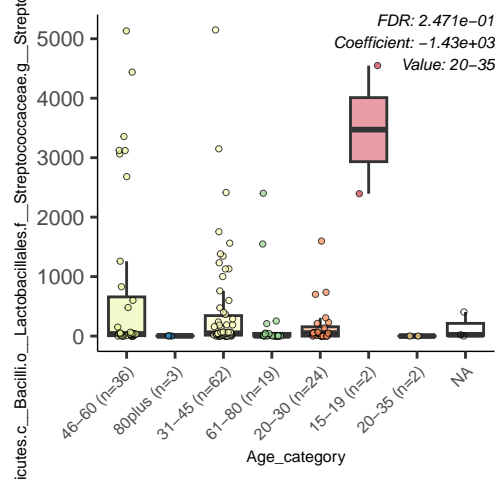

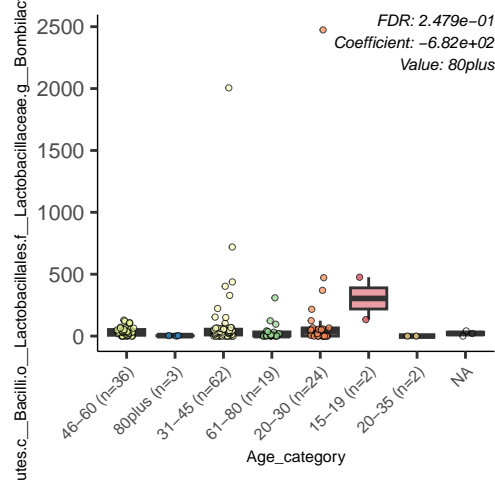

d\_\_Bacteria.p\_\_Proteobacteria.c\_\_Betaproteobacteria.o\_\_Nitros

*FDR: 2.487e-01*  
*Coefficient: -1.41e+02*  
*Value: 20-30*

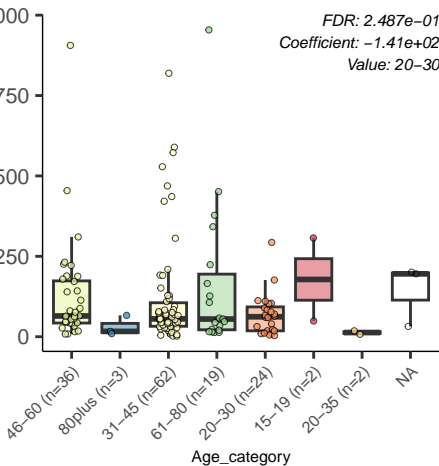

Gamma\_\_proteobacteria.o\_\_Pasteurellales.f\_\_Pasteurellaceae.g\_\_A

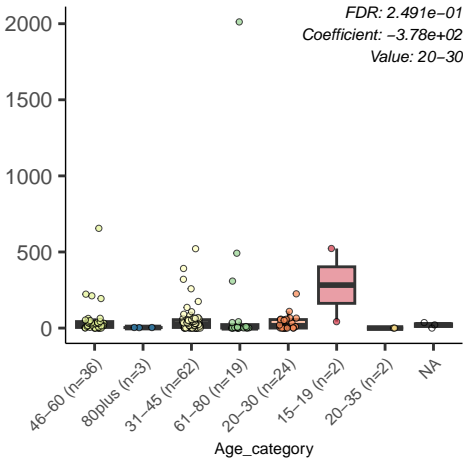

Supplement: s1 [file s1]
