# Supplementary material for: Metatranscriptome Analysis of Nasopharyngeal Swabs across the Varying Severity of COVID-19 Disease Demonstrated Unprecedented Species Diversity
Source: MDPI journal article supplement (doi:10.3390/microorganisms11071804), 2023-07-14

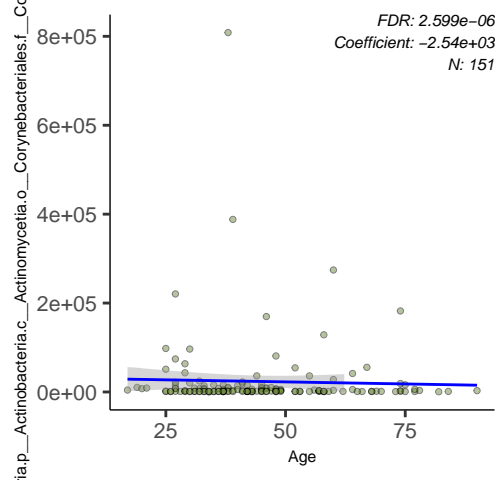

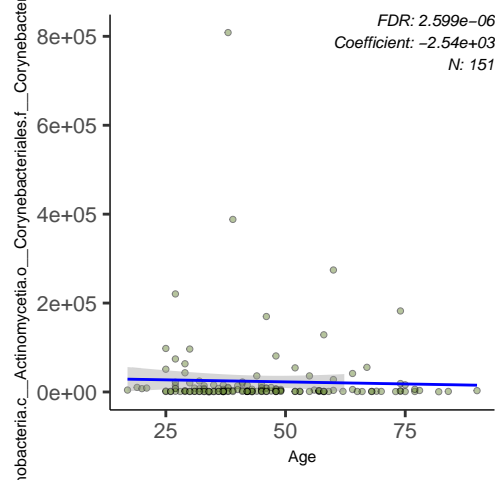

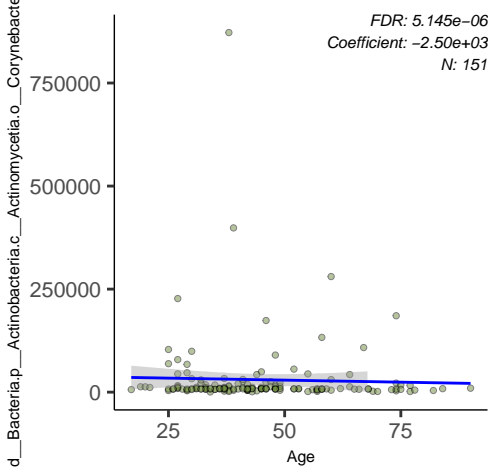

tinomycetia.o\_\_Corynebacteriales.f\_\_Corynebacteriaceae.g\_\_Coryn

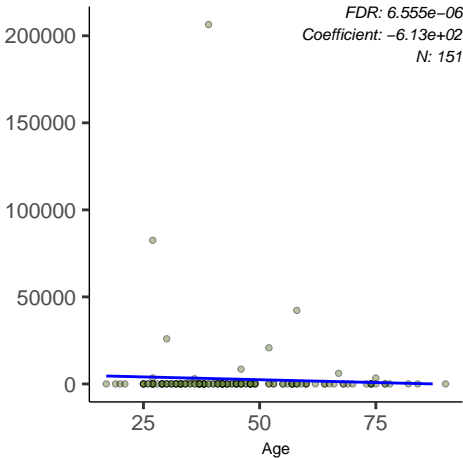

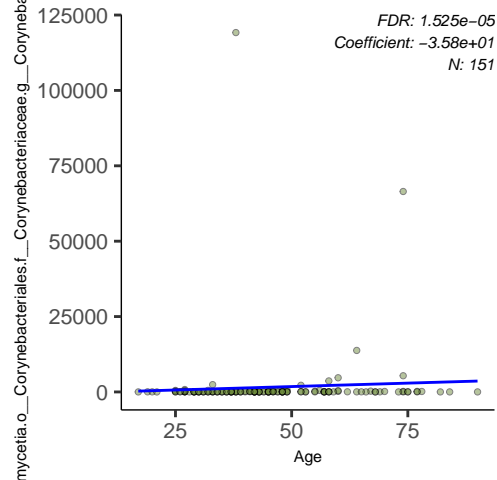

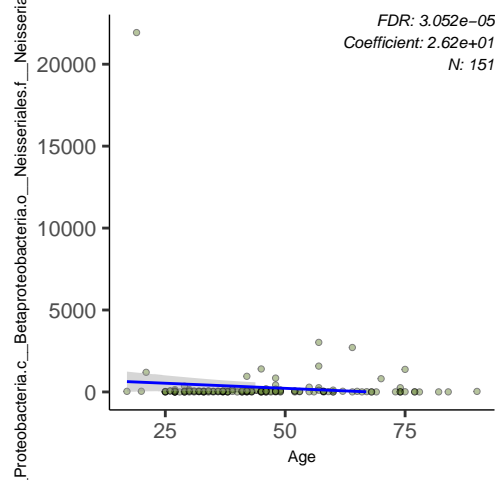

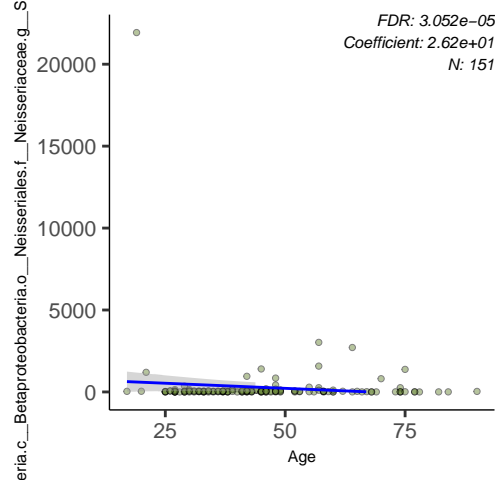

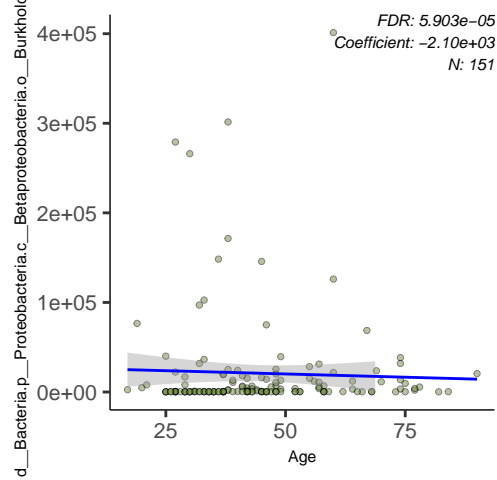



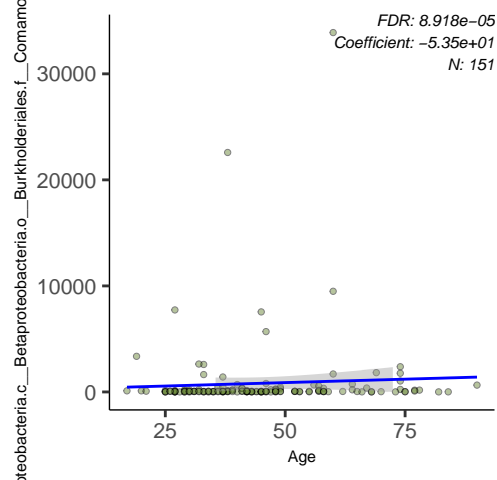

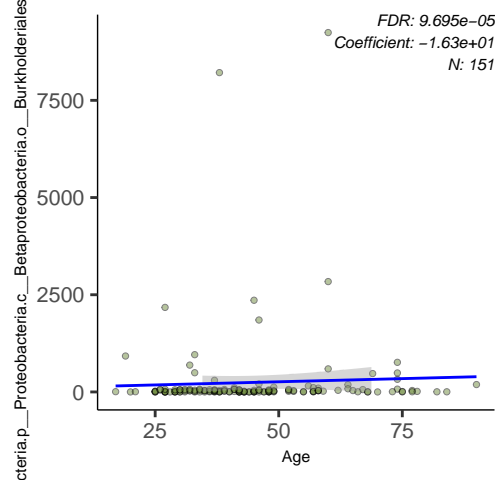

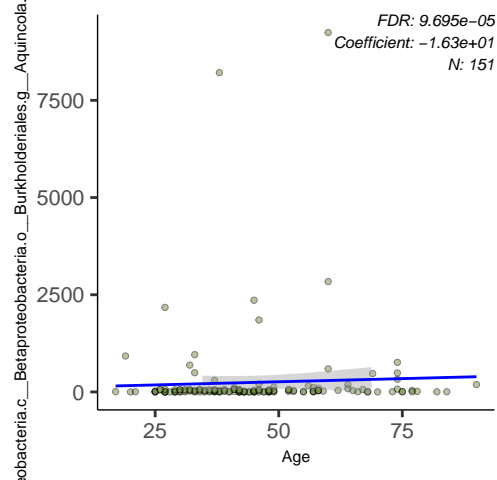

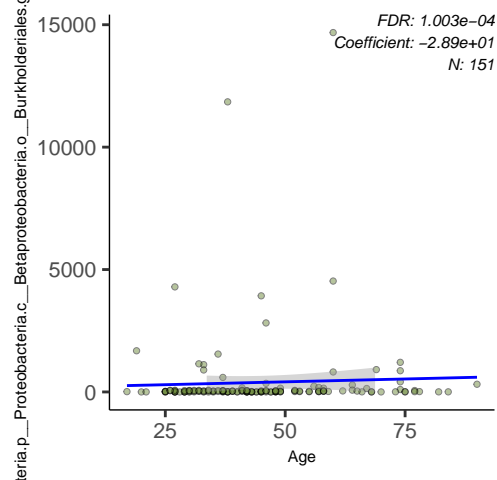

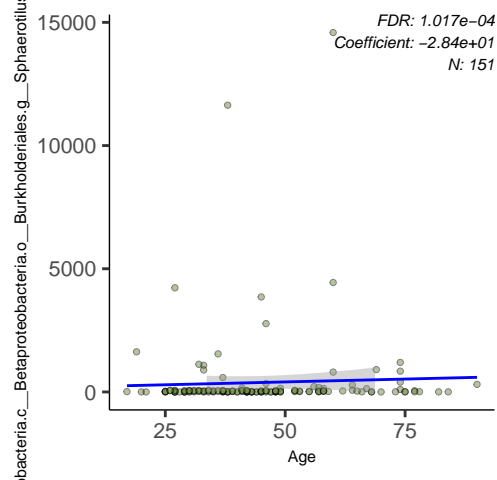

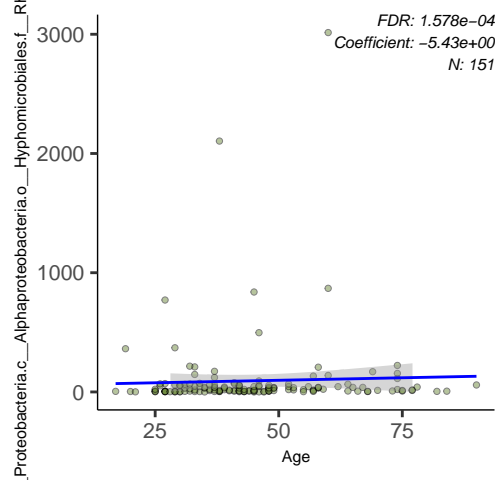

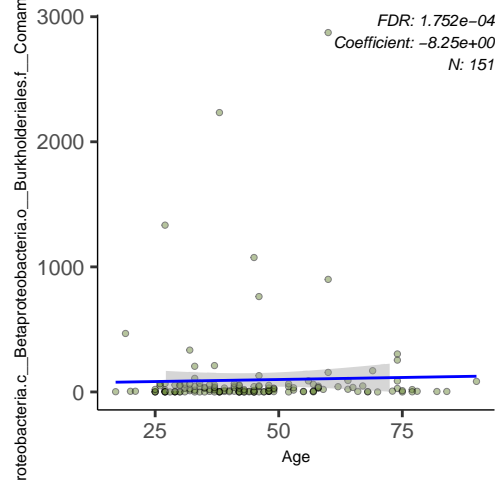

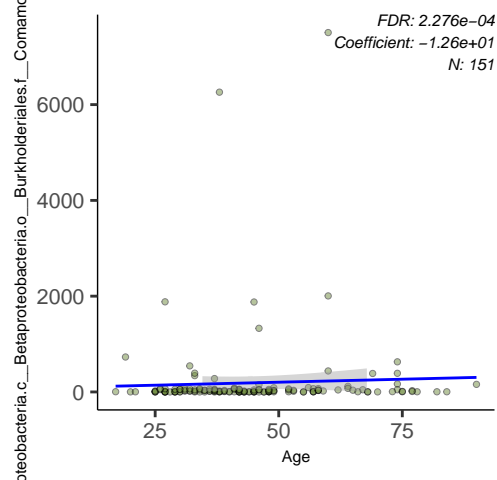



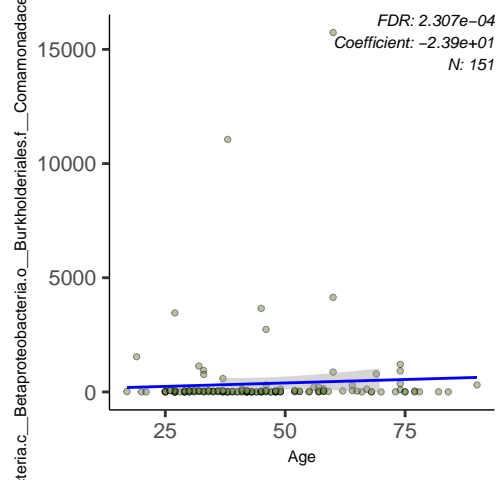

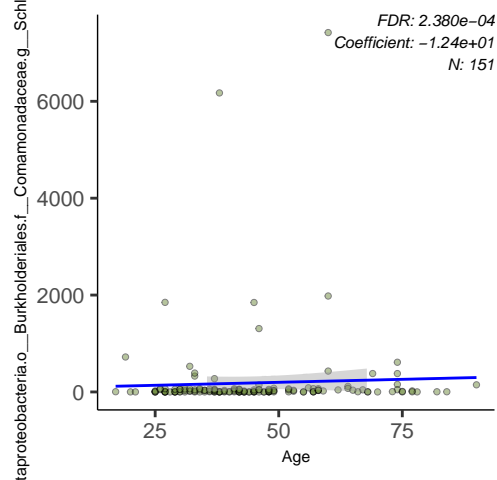

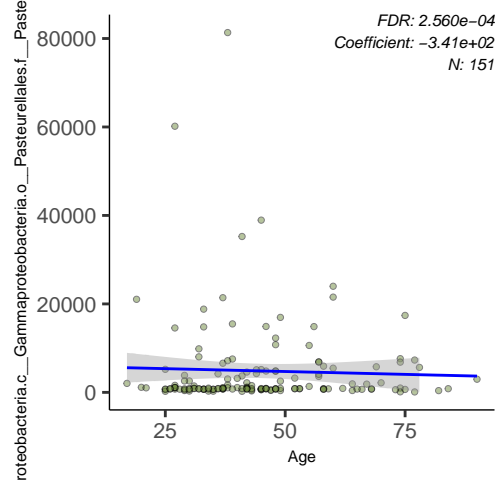

acteria.p\_\_Proteobacteria.c\_\_Betaproteobacteria.o\_\_Burkholderiales

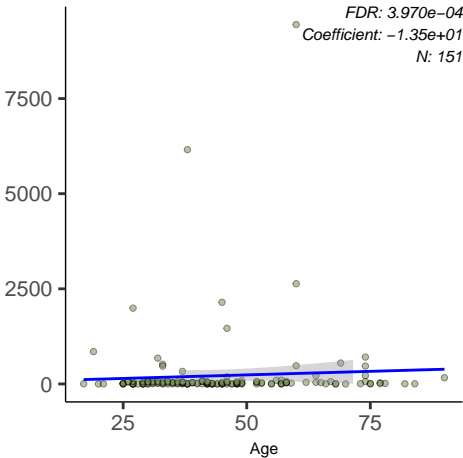

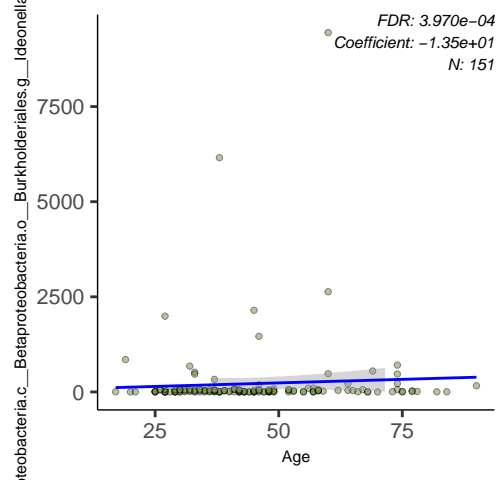

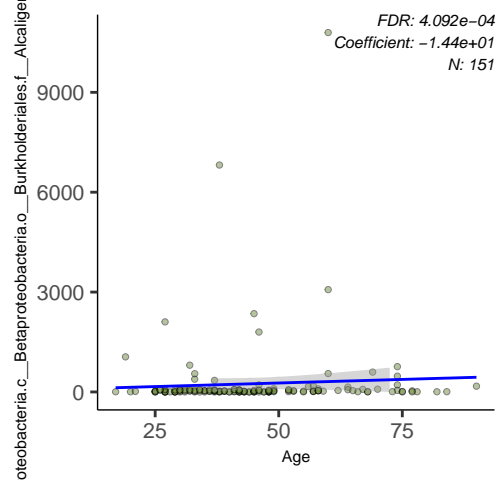

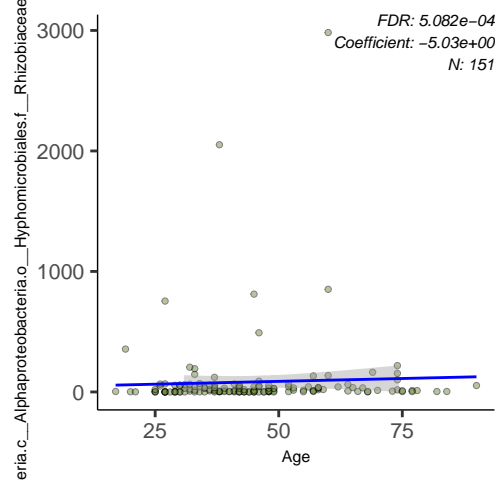

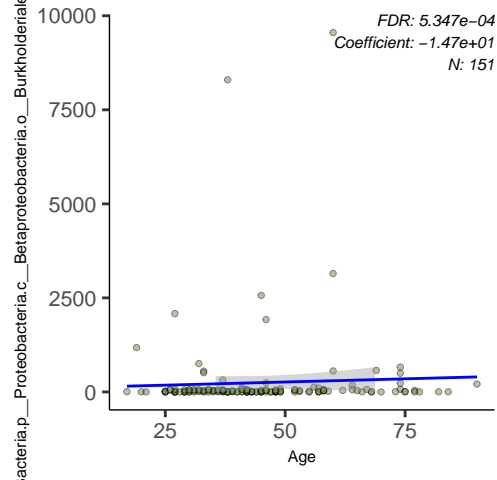



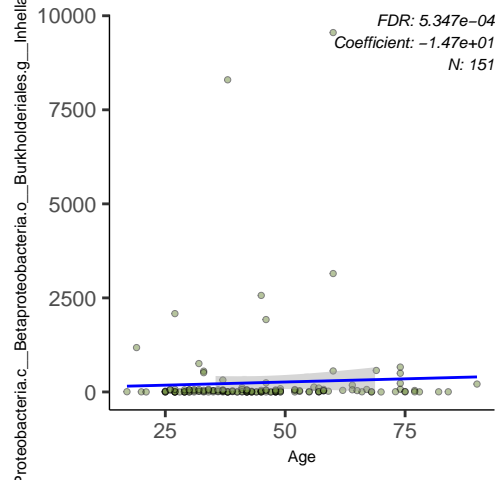

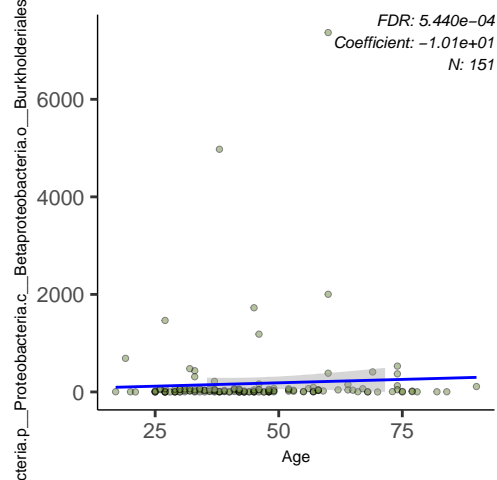

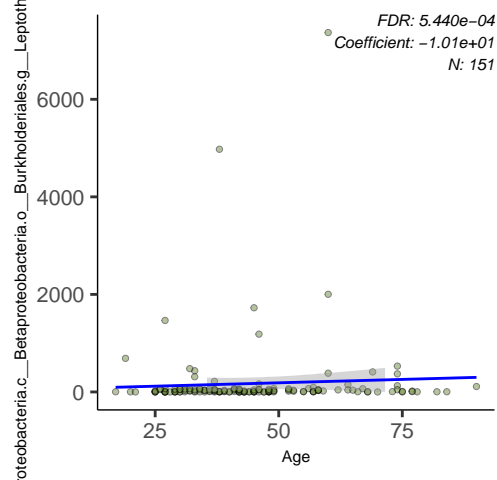

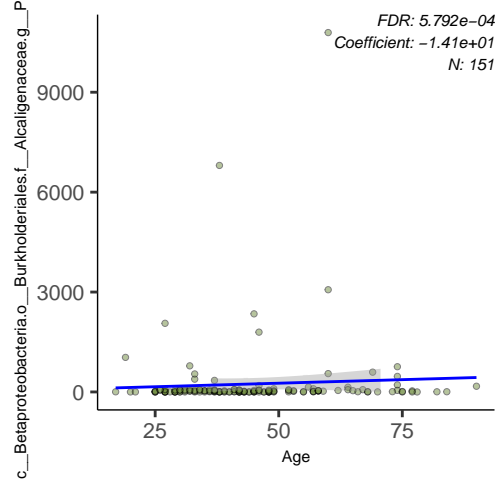

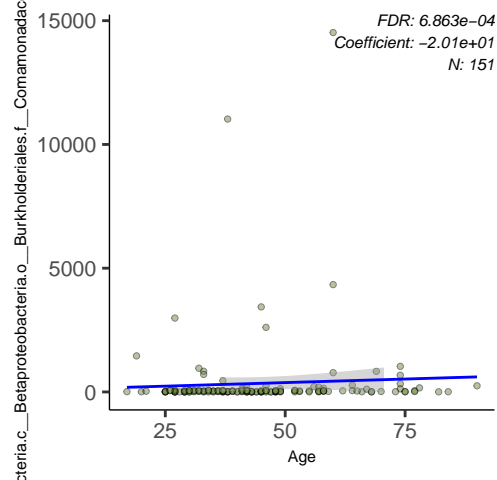

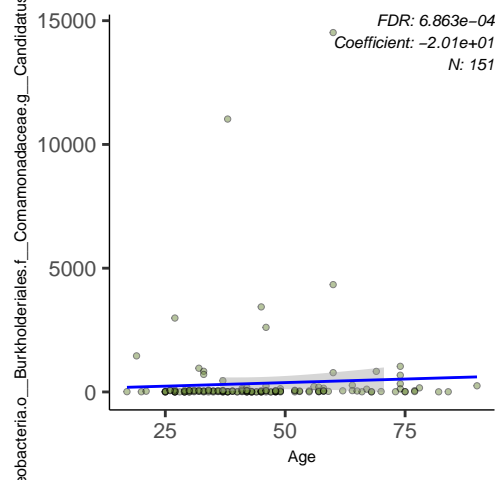

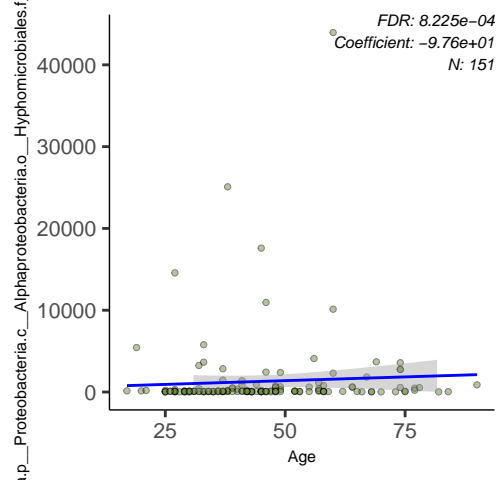

obacteria.c\_\_Alphaproteobacteria.o\_\_Hyphomicrobiales.f\_\_Nitroba

15000

10000

5000

0

25

50

75

Age

FDR: 1.025e-03

Coefficient: -4.35e+01

N: 151

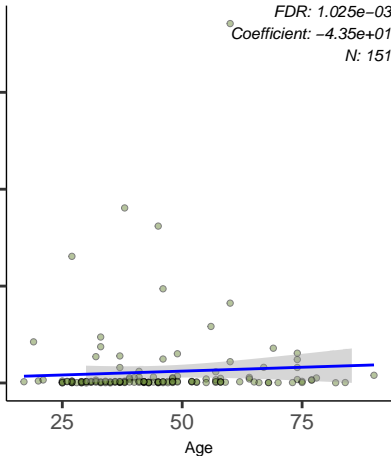



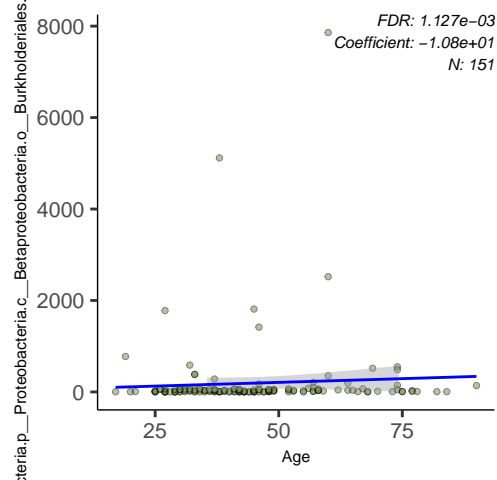

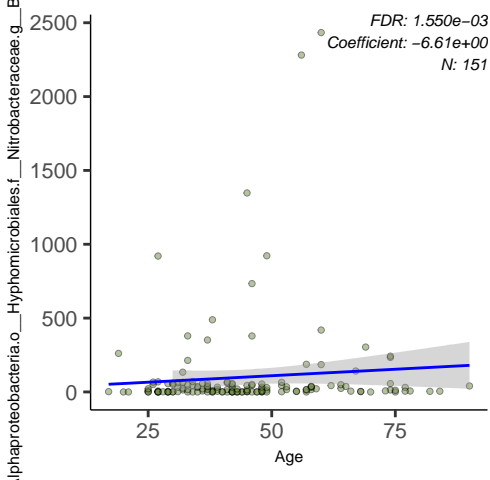

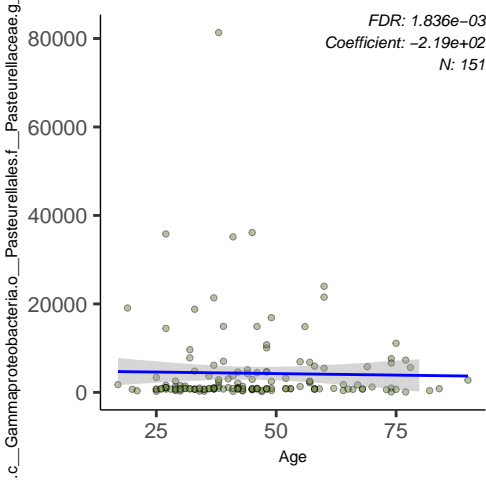

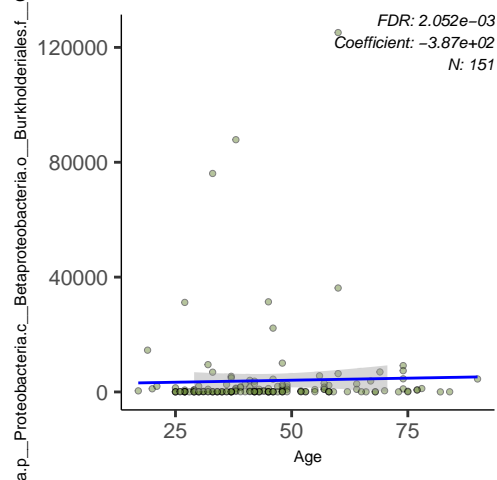

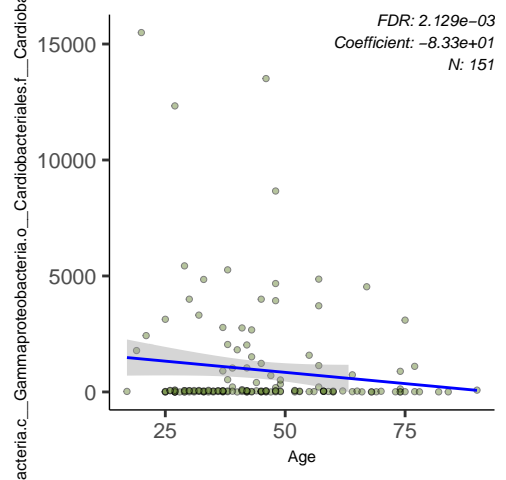

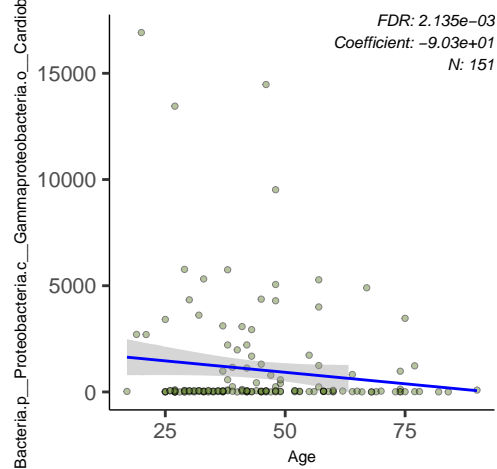

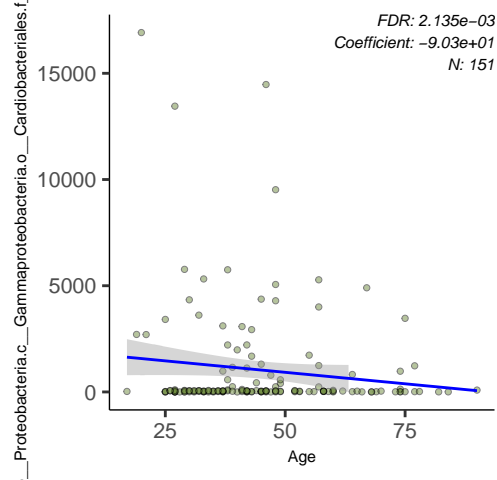

mmaproteobacteria.o\_\_Cardiobacteriales.f\_\_Cardiobacteriaceae.g

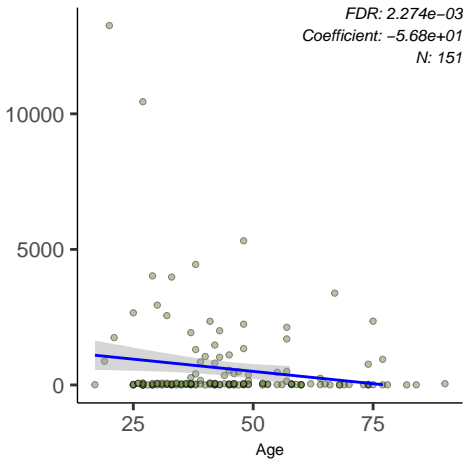



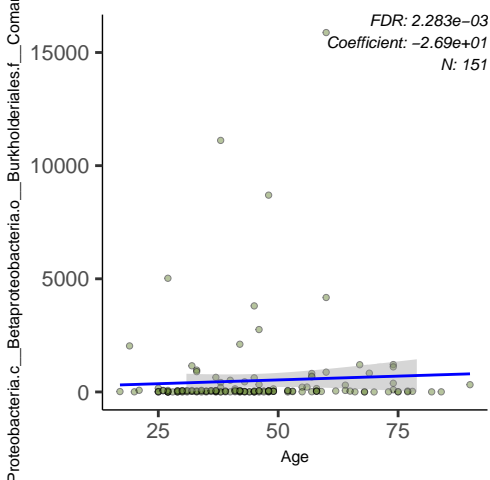

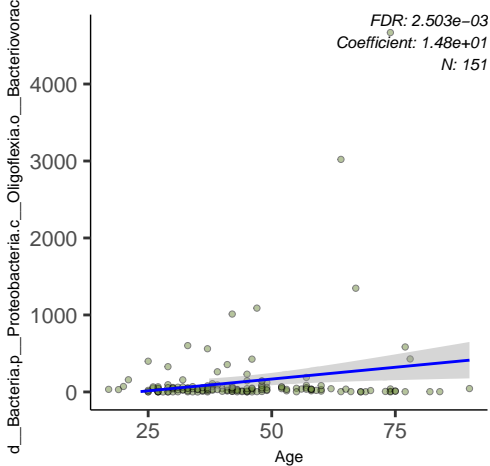

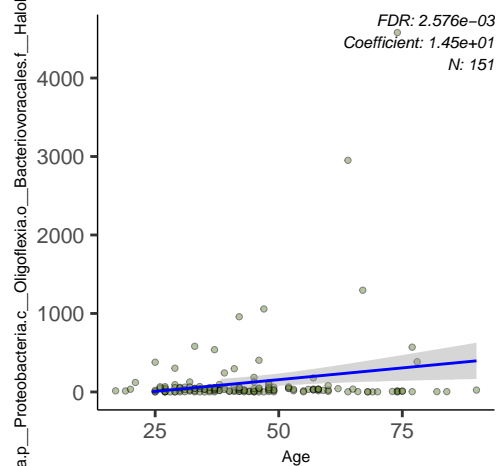

teobacteria.c\_\_Oligoflexia.o\_\_Bacteriovoracales.f\_\_Halobacteriovora

*FDR: 2.576e-03*  
*Coefficient: 1.45e+01*  
*N: 151*

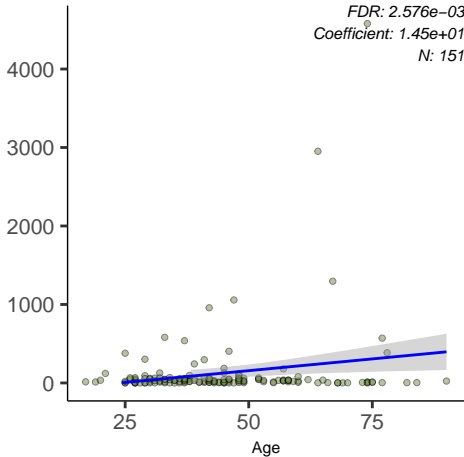

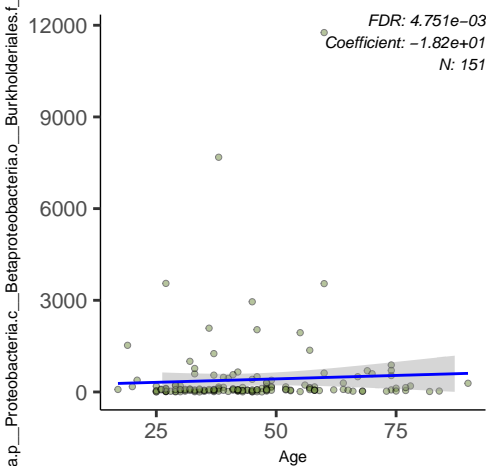

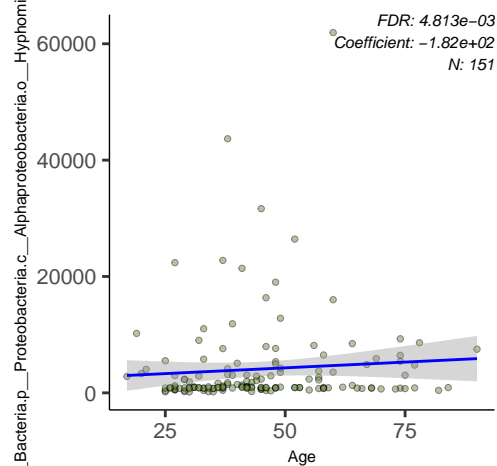

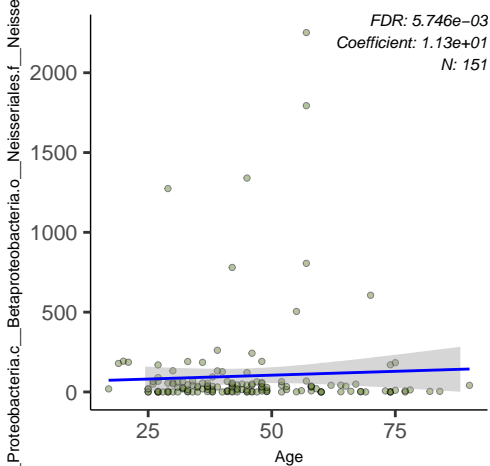

bacteria.c\_\_Betaproteobacteria.o\_\_Neisseriales.f\_\_Neisseriaceae.g

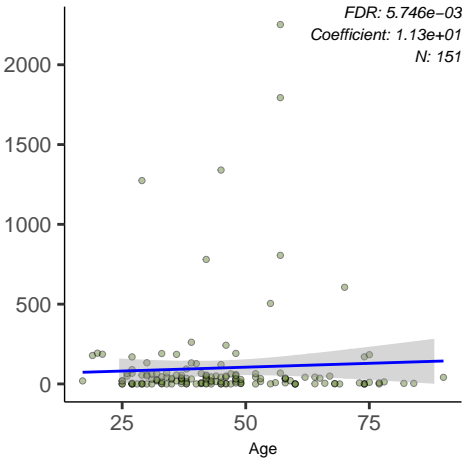



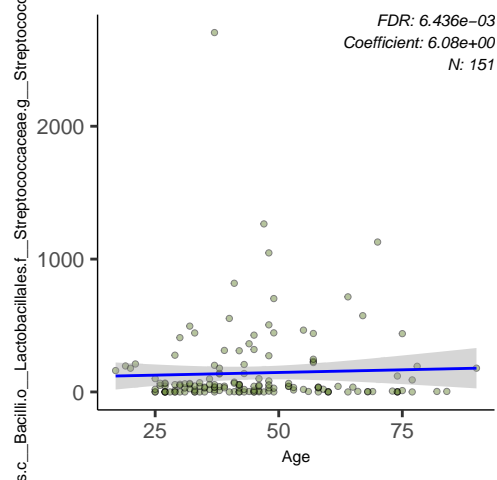

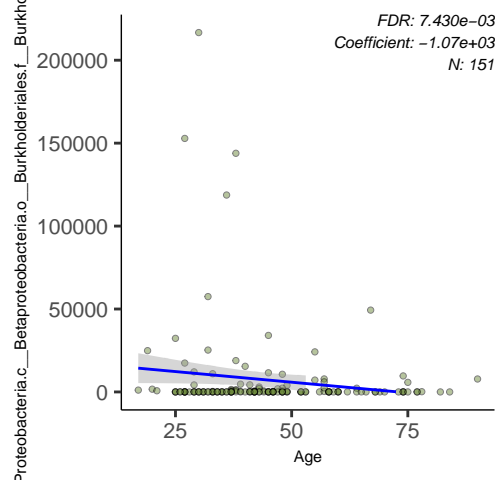

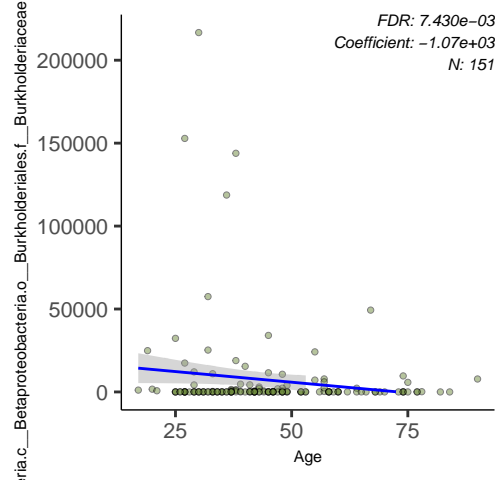

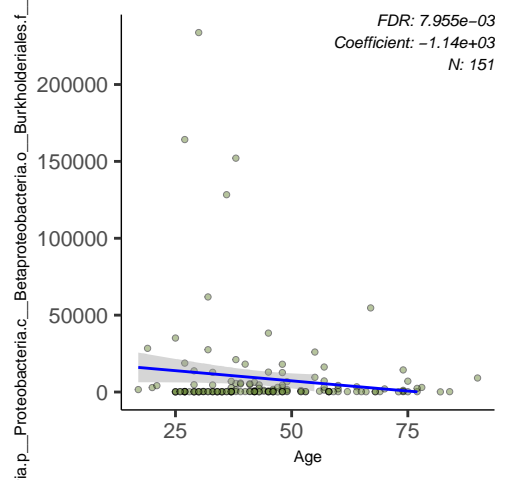

d\_\_Bacteria.p\_\_Proteobacteria.c\_\_Oligoflexia

*FDR: 8.269e-03*  
*Coefficient: 3.22e+01*  
*N: 151*

10000

5000

0

25

50

75

Age

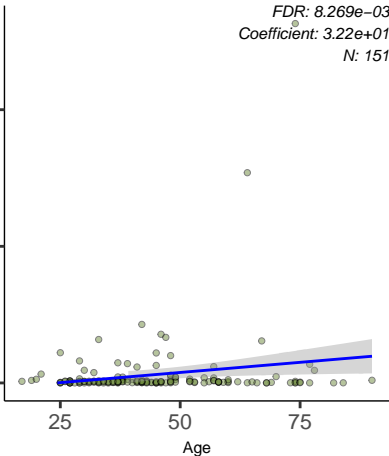

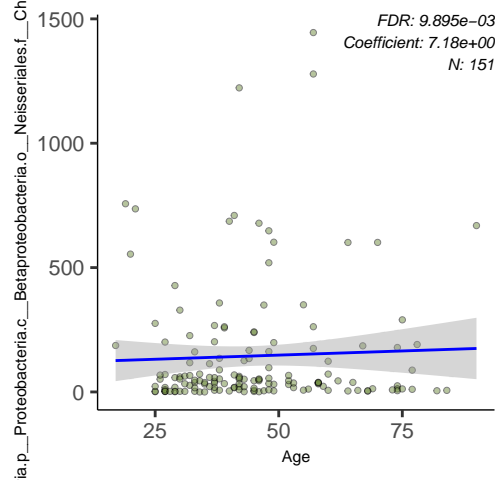

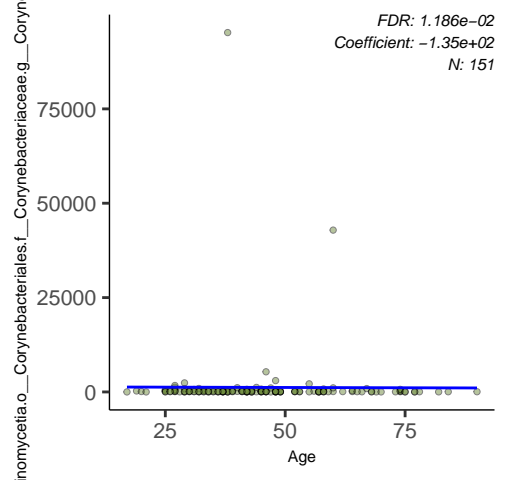

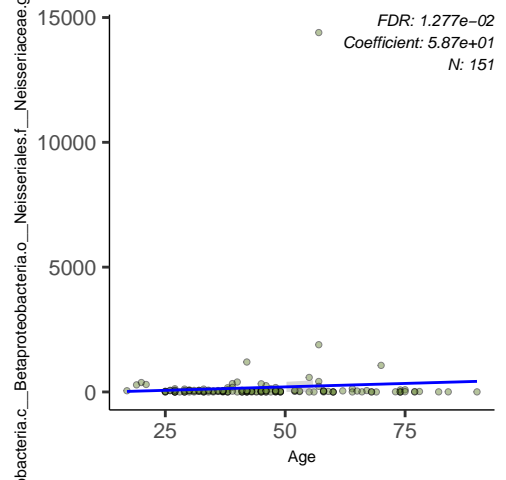



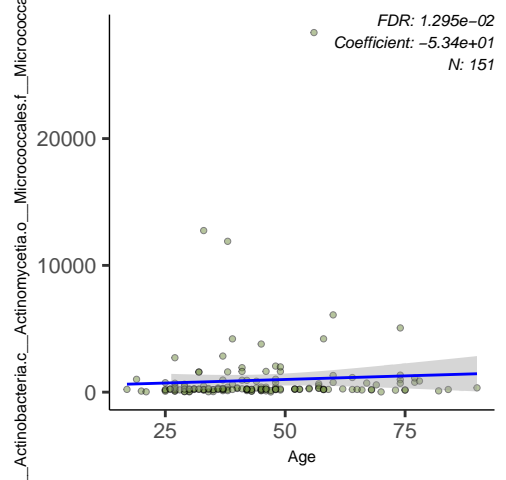

eria.p\_\_Firmicutes.c\_\_Clostridia.o\_\_Eubacteriales.f\_\_Clostridiaceae

*FDR: 1.328e-02*  
*Coefficient: 6.17e+00*  
*N: 151*

1000

500

0

25

50

75

Age

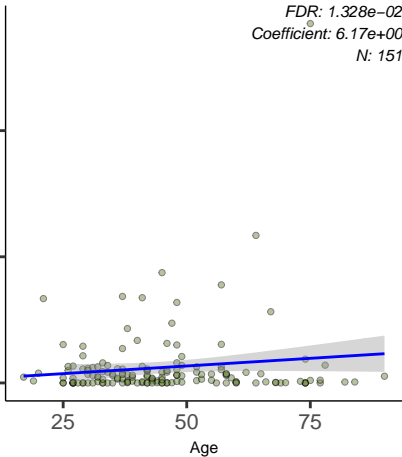

icutes.c\_\_Clostridia.o\_\_Eubacteriales.f\_\_Clostridiaceae.g\_\_Caloram

*FDR: 1.328e-02*  
*Coefficient: 6.17e+00*  
*N: 151*

1000

500

0

25

50

75

Age

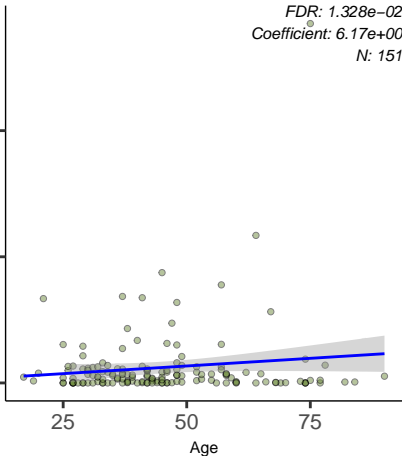

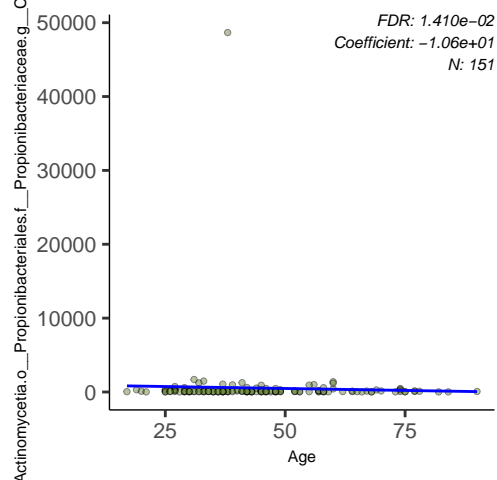

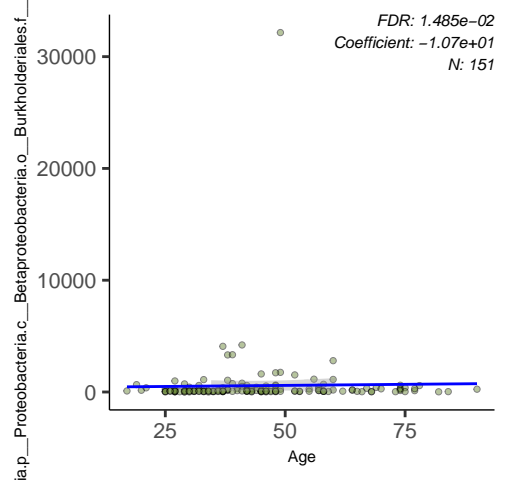

eria.p\_\_Firmicutes.c\_\_Clostridia.o\_\_Eubacteriales.f\_\_Clostridiaceae

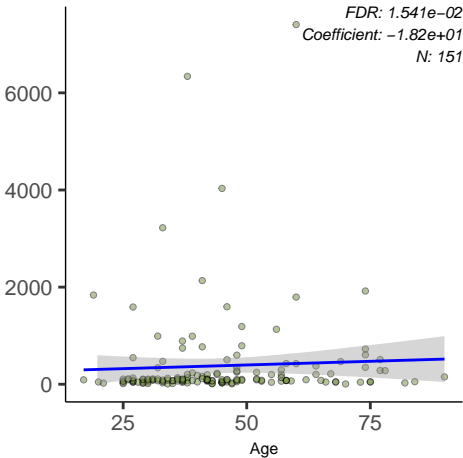

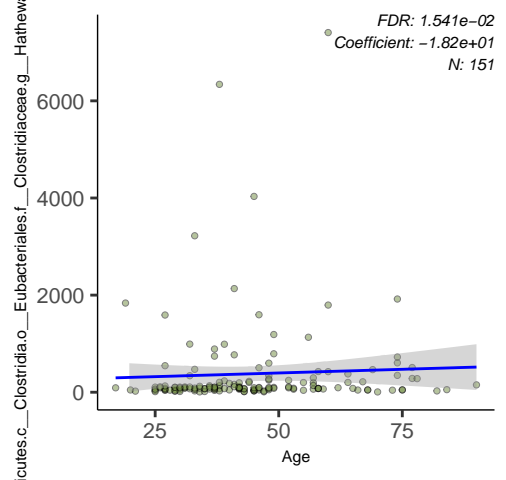

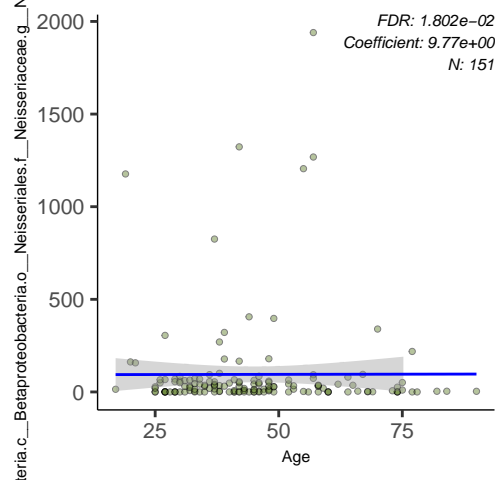



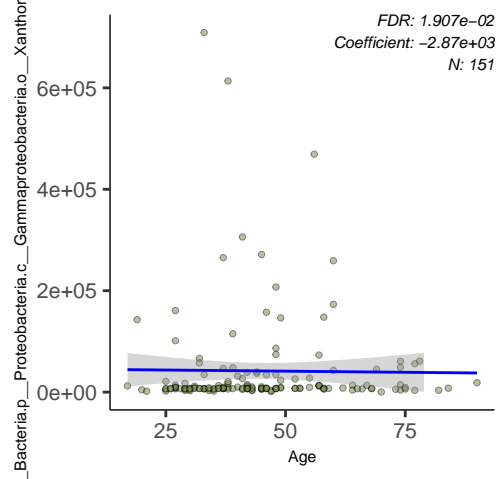

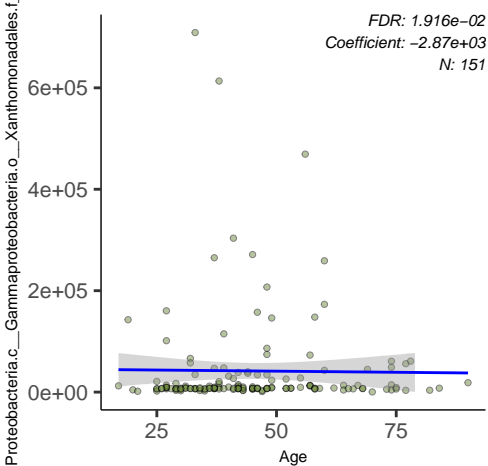

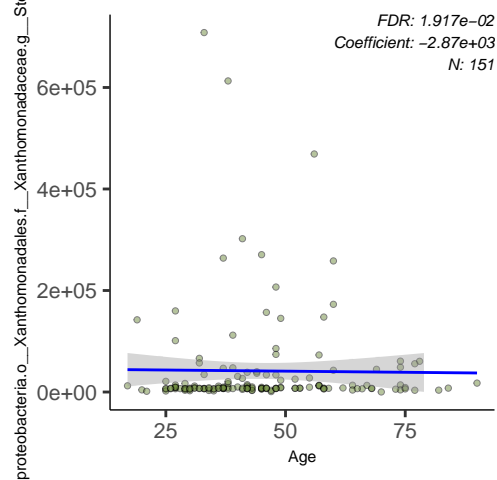

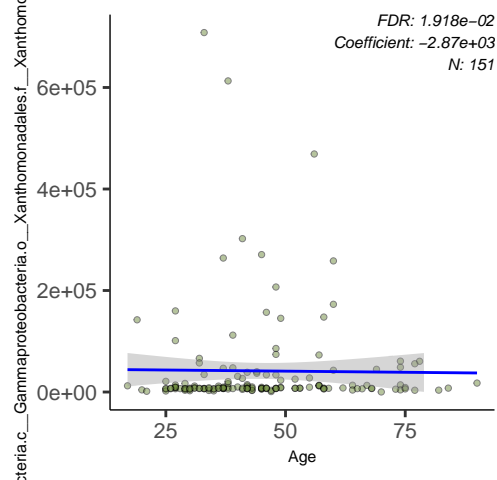

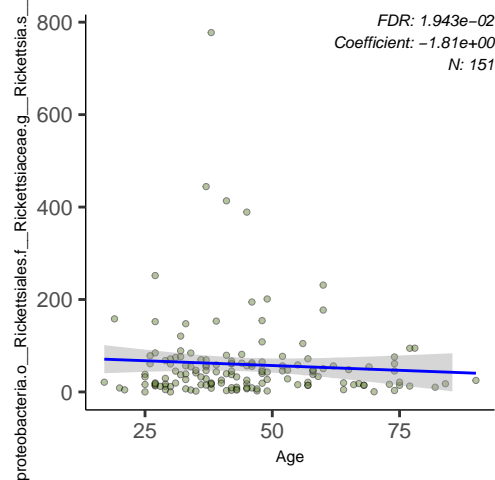

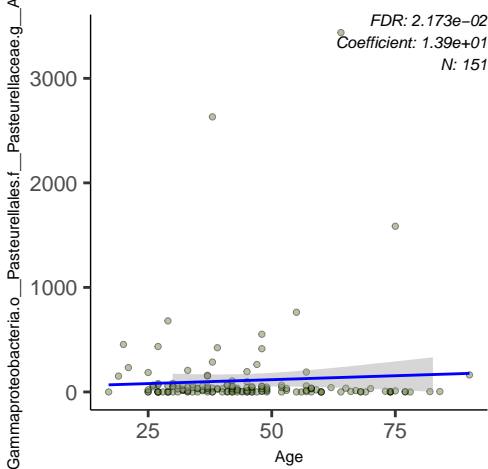

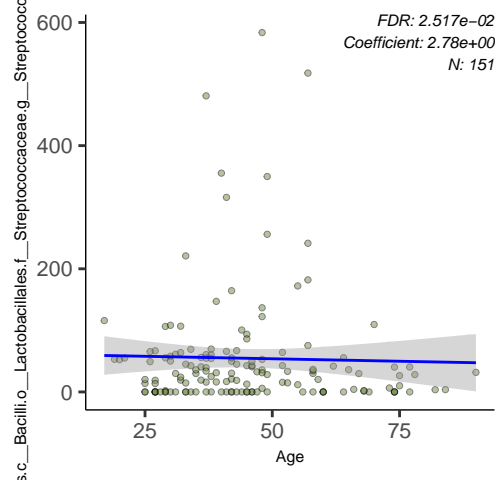

p\_Firmicutes.c\_\_Clostridia.o\_\_Eubacteriales.f\_\_Peptococcaceae.g

FDR:  $2.534e-02$   
Coefficient:  $2.04e+01$   
N: 151

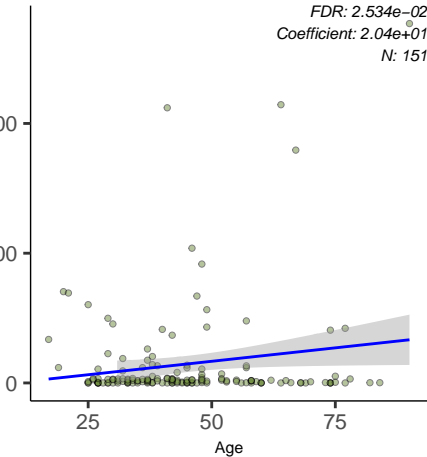



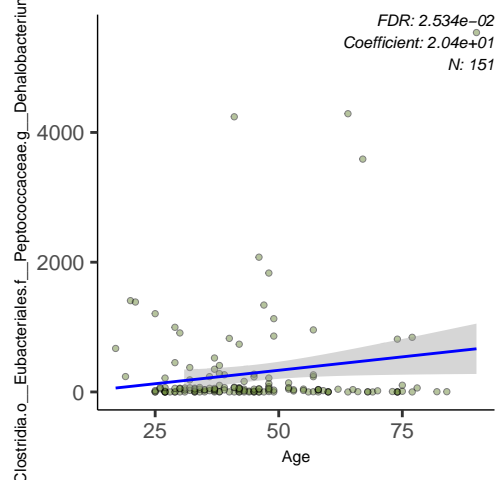

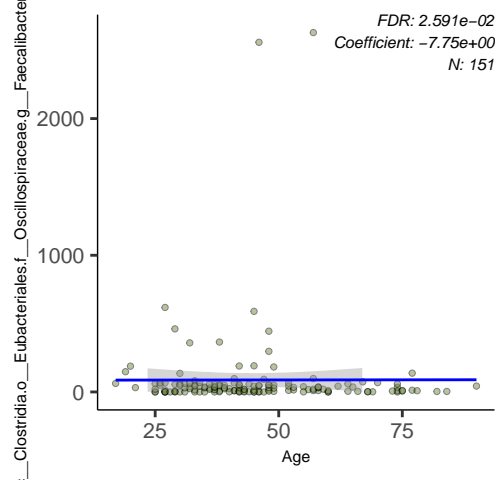

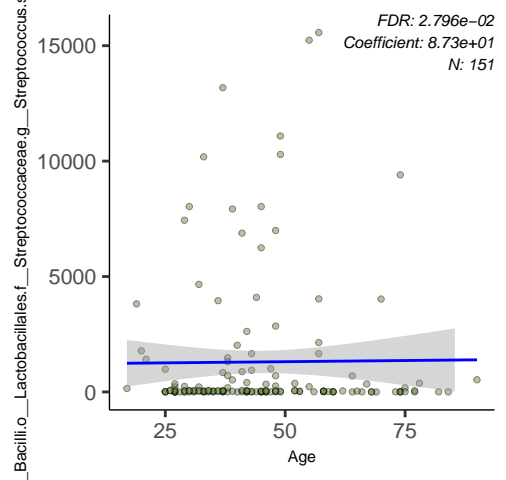

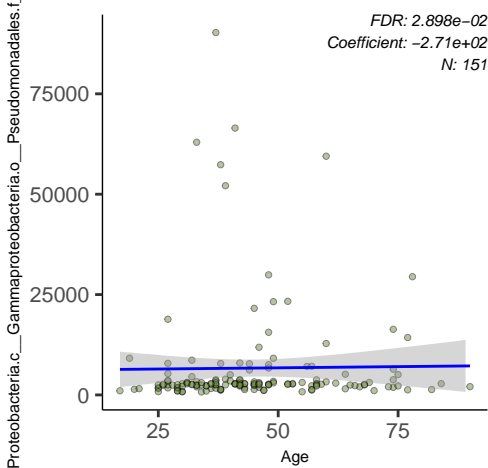

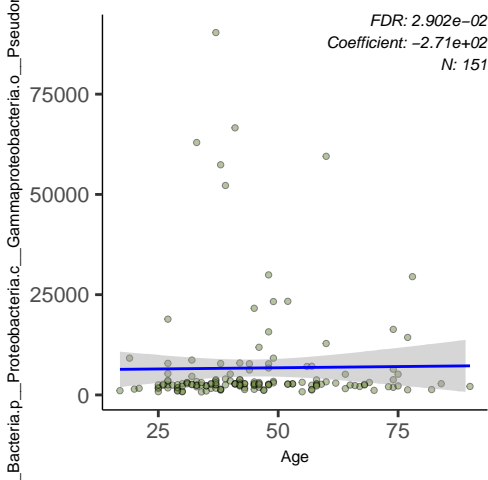

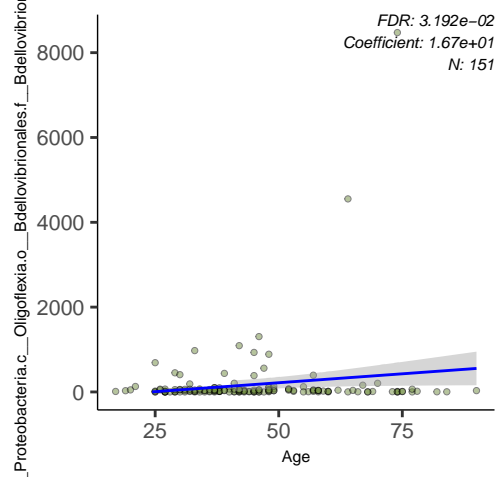

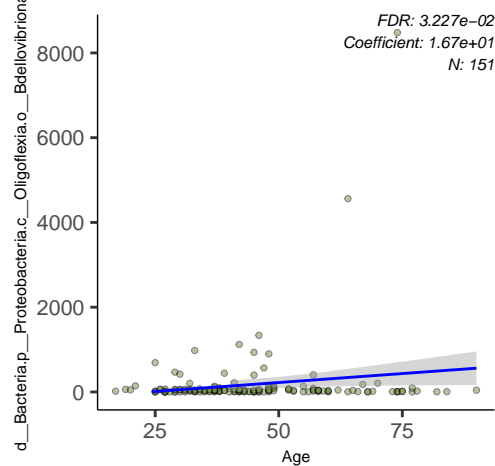

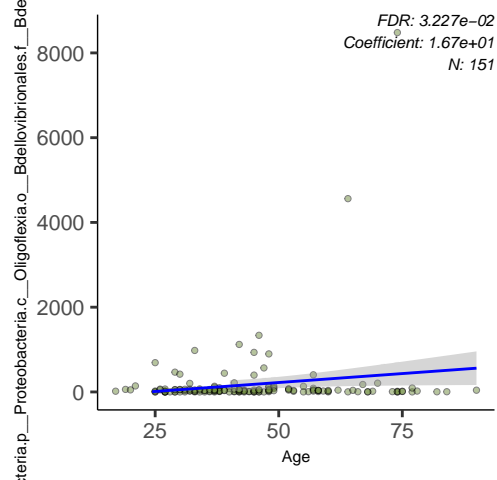



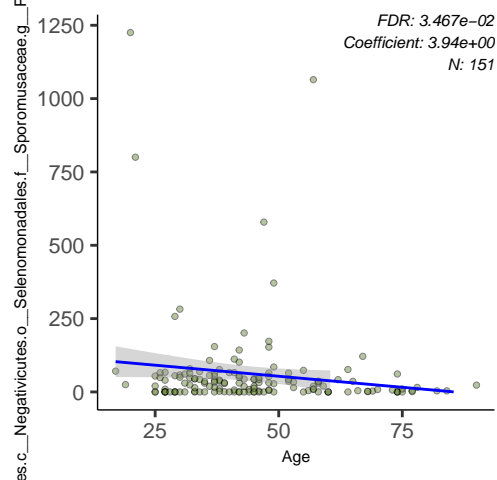

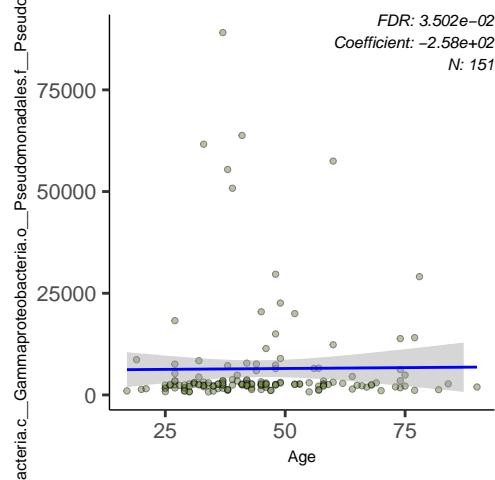

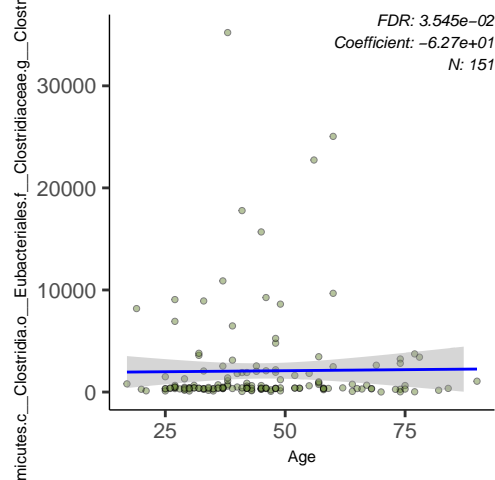

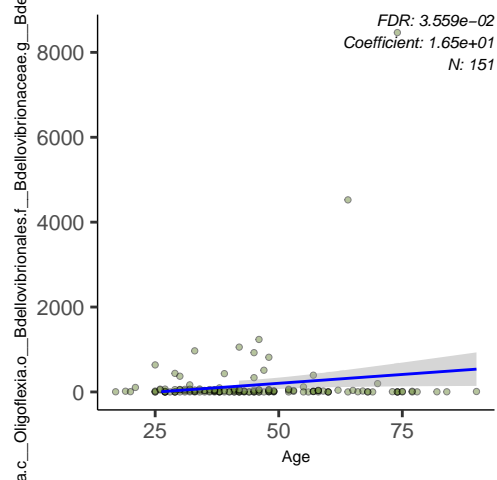

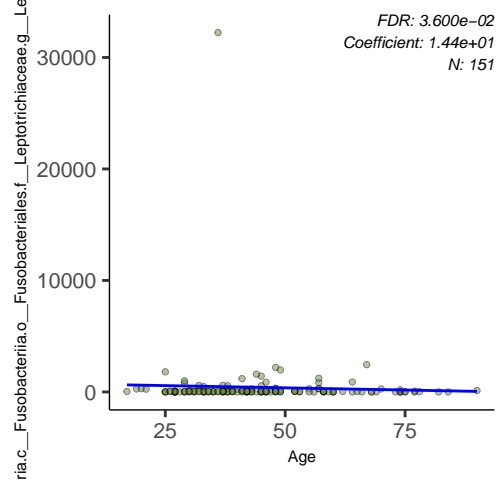

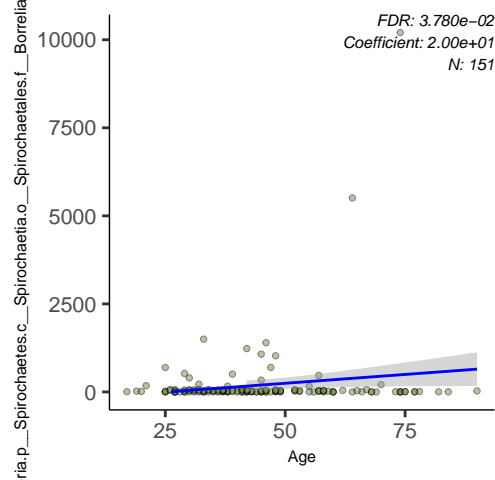

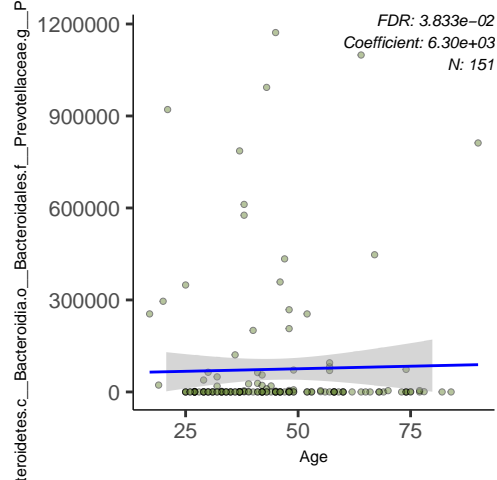

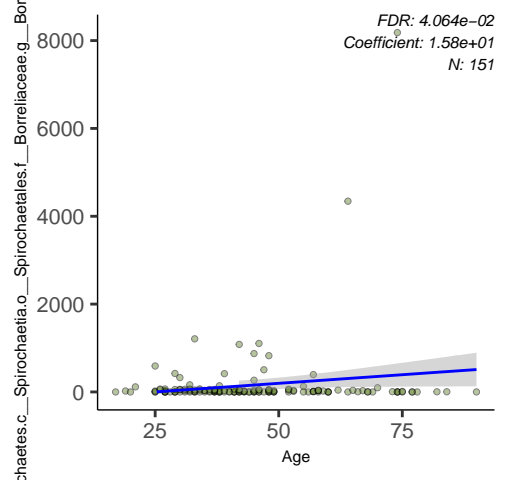



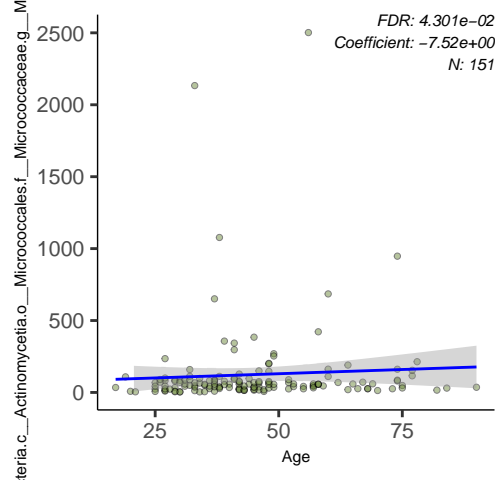

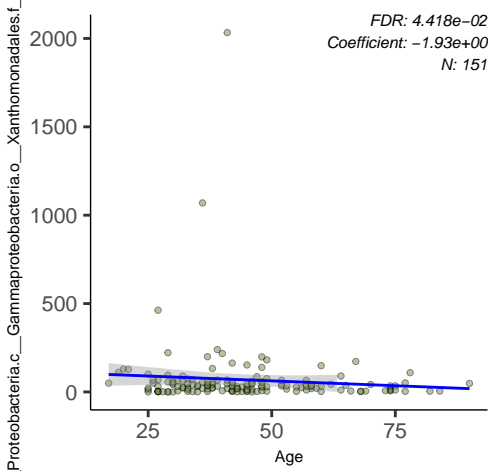

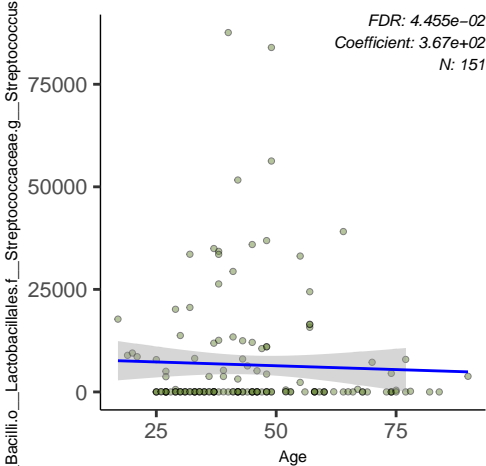

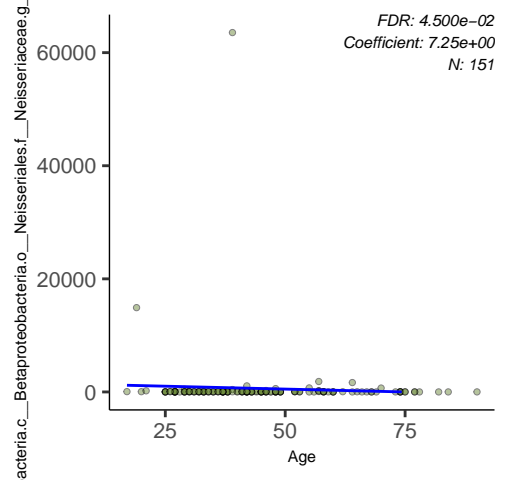

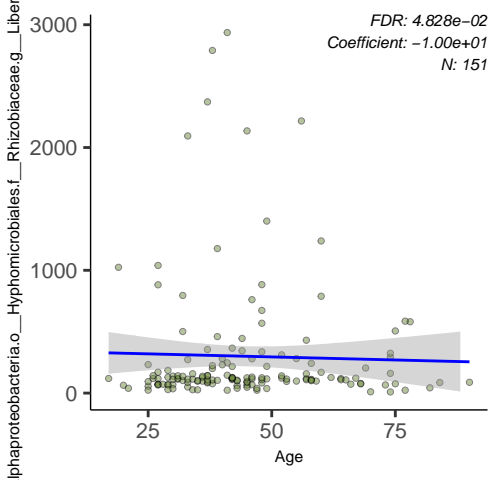

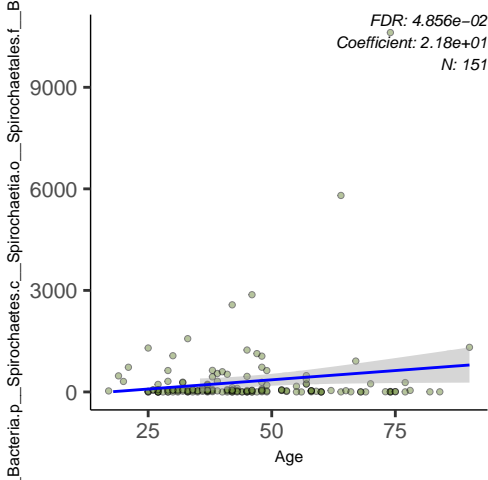

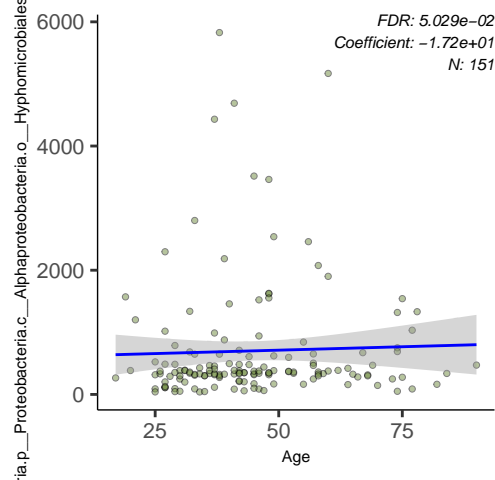

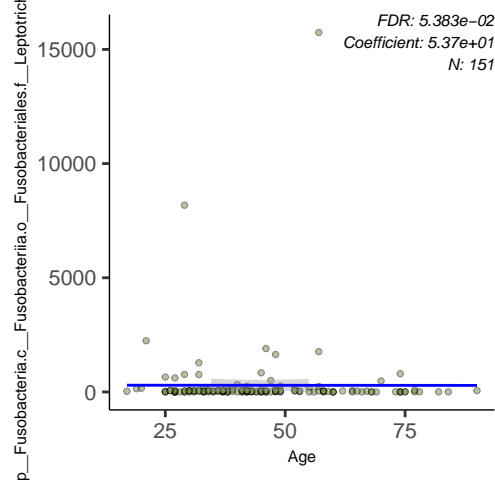



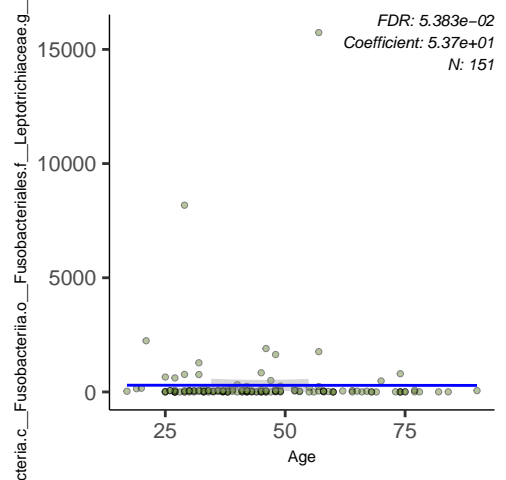

nobacteria.c\_\_Actinomycetia.o\_\_Propionibacteriales.f\_\_Propionibac

*FDR: 5.532e-02*  
*Coefficient: -1.80e+02*  
*N: 151*

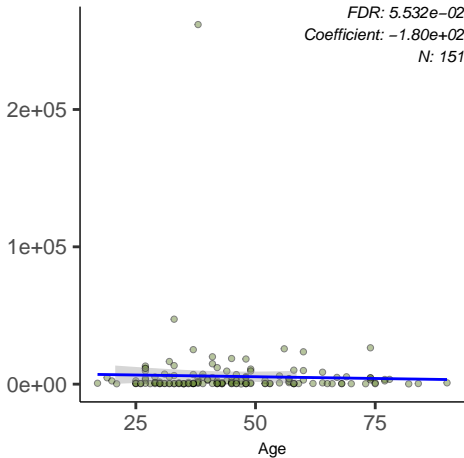

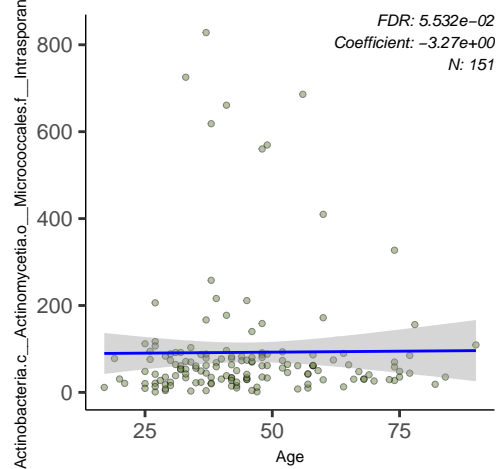

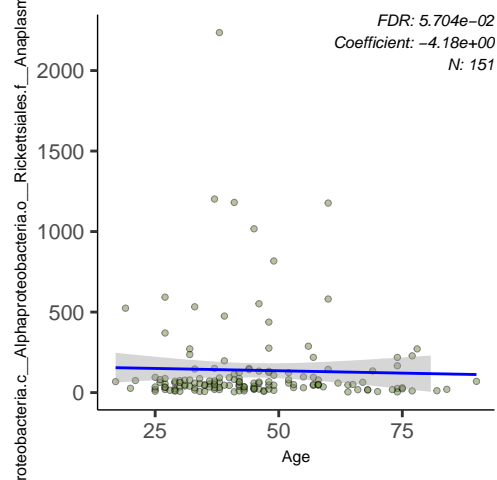

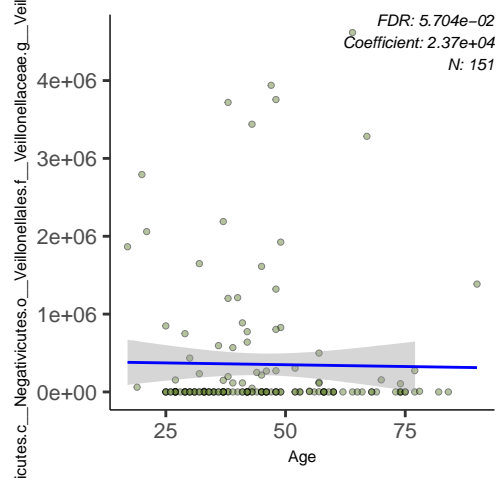

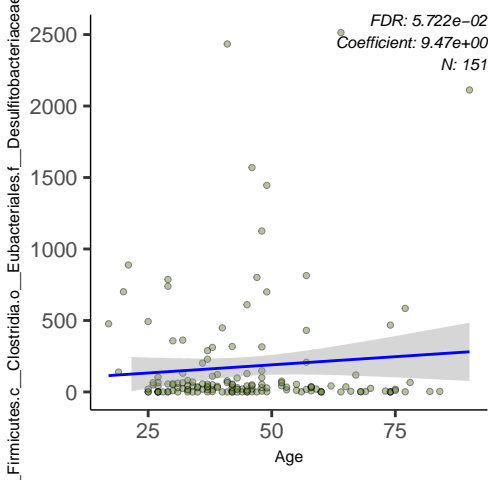

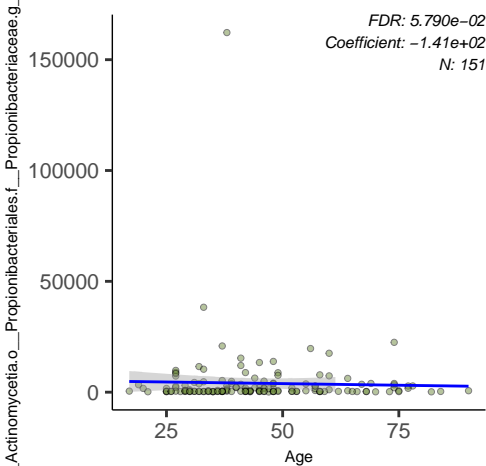

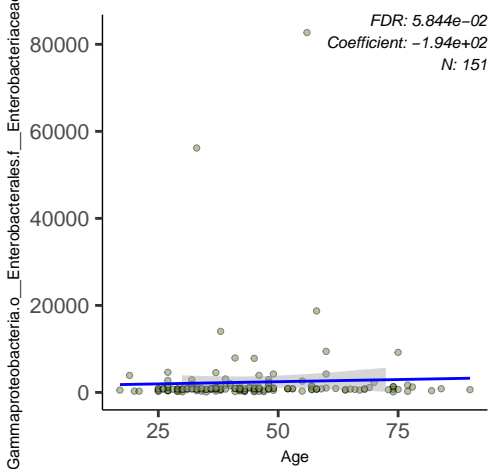



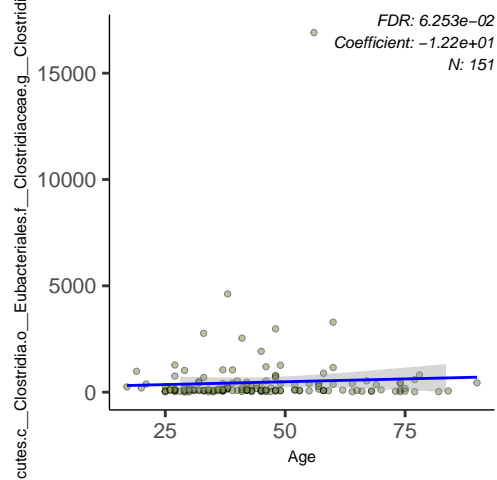

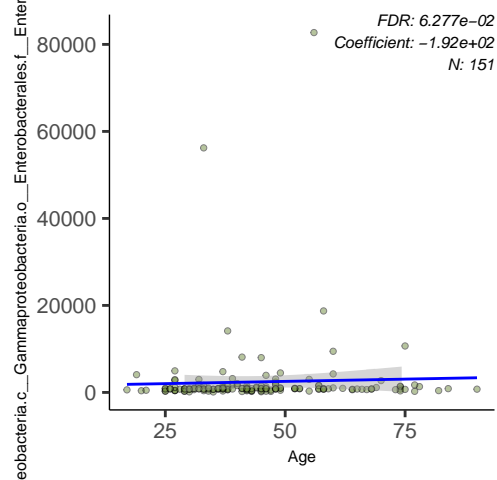

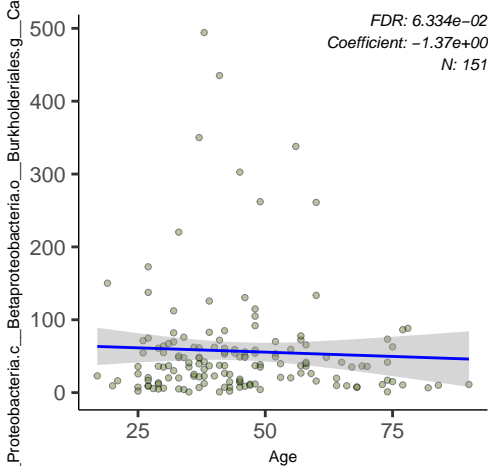

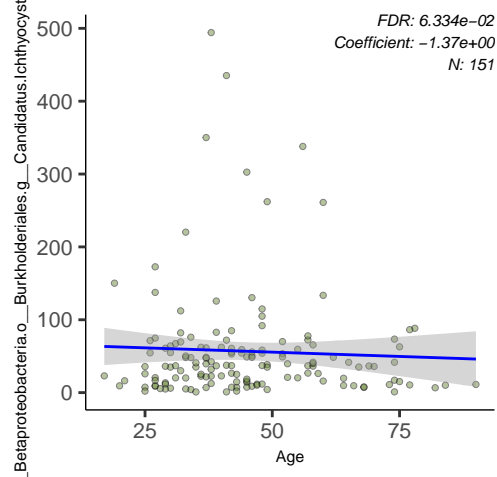

inobacteria.c\_\_Actinomycetia.o\_\_Micrococcales.f\_\_Micrococcaceae

*FDR: 6.383e-02*  
*Coefficient: -1.48e+02*  
*N: 151*

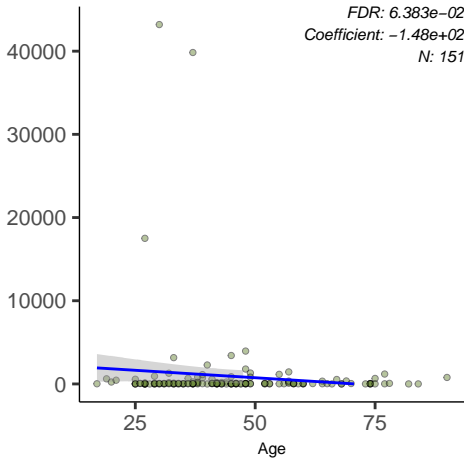

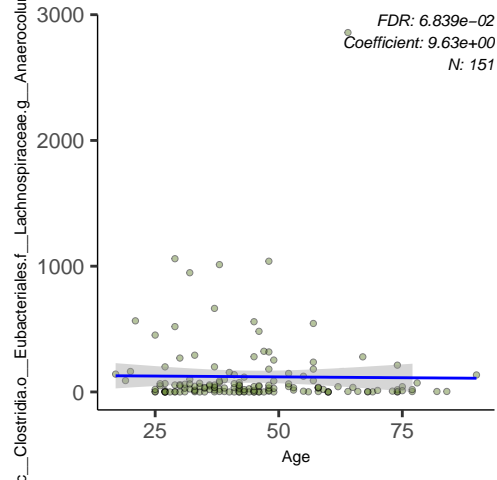

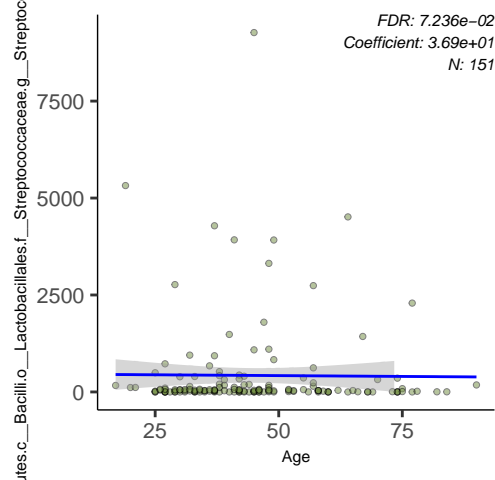

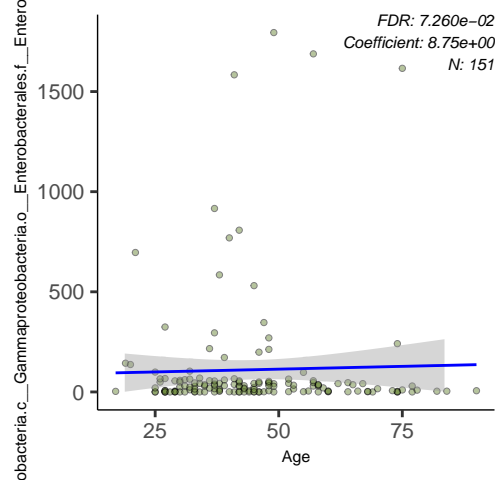



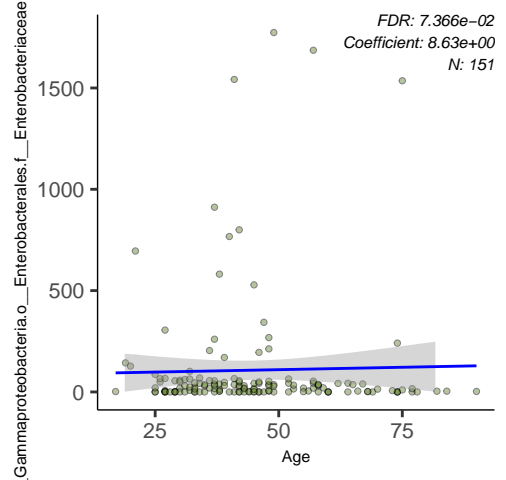

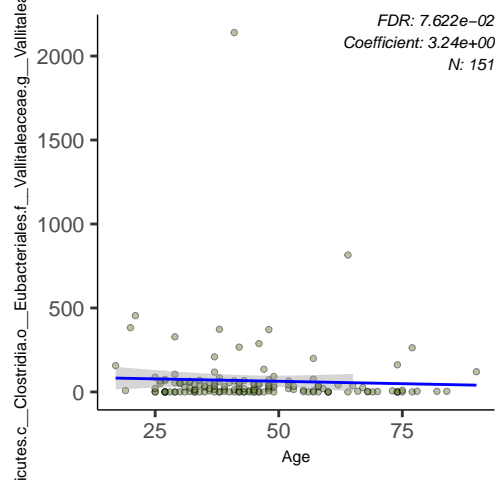

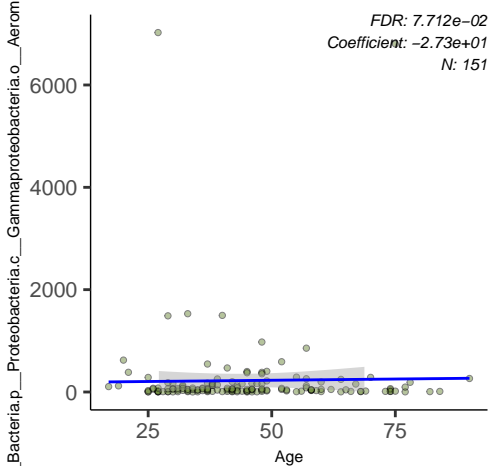

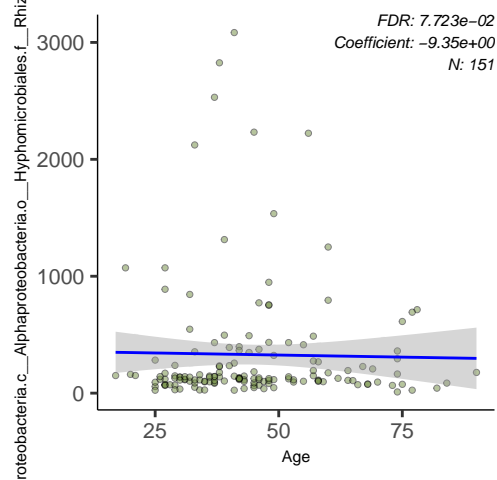

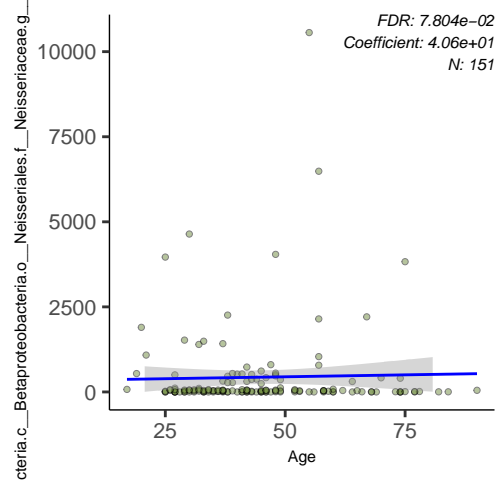

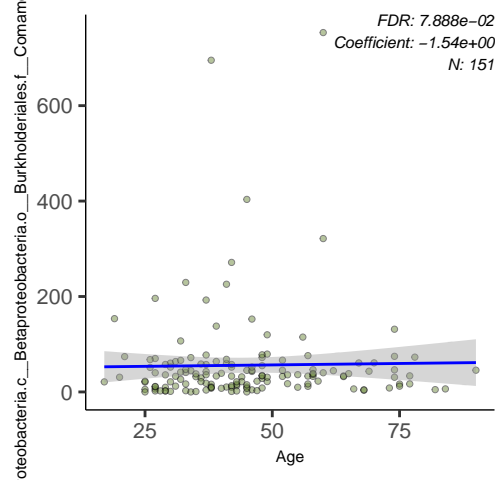

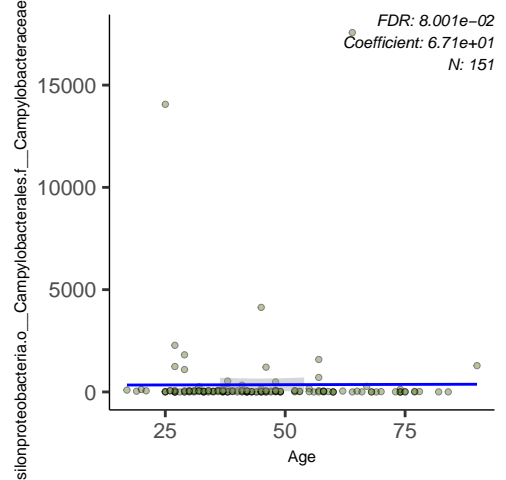

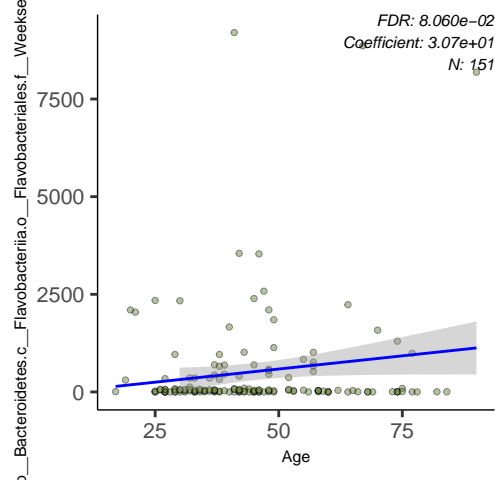



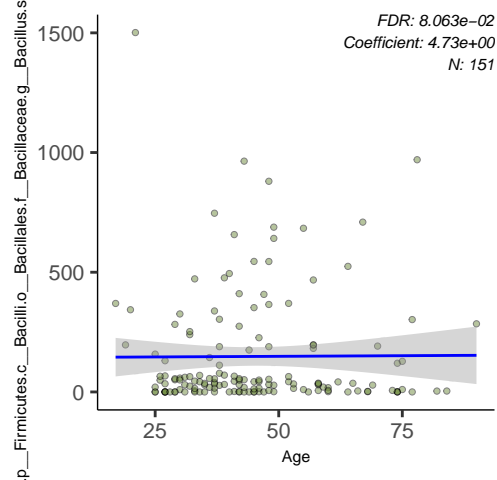

Actinobacteria.c\_Actinomyces.o\_Micrococcales.f\_Intra

FDR:  $8.114e-02$   
Coefficient:  $-5.83e+00$   
N: 151

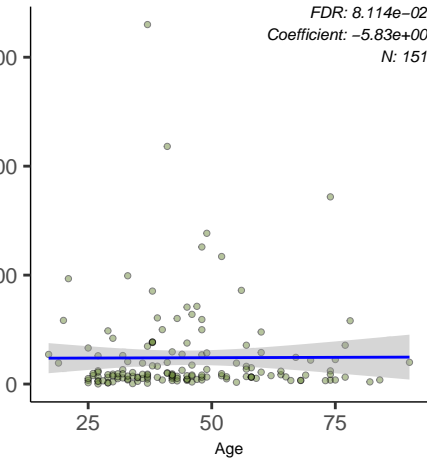

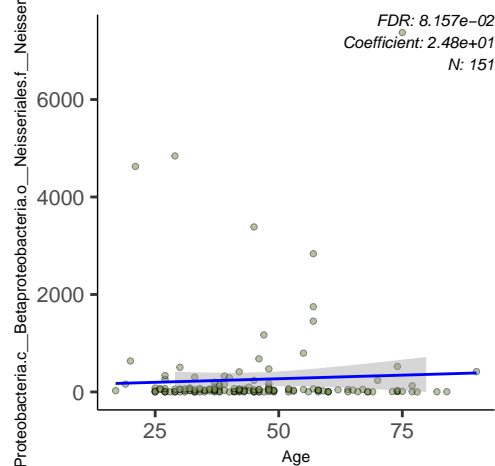

eria.c\_\_Betaproteobacteria.o\_\_Neisseriales.f\_\_Neisseriaceae.g\_\_S

FDR:  $8.157e-02$   
Coefficient:  $2.48e+01$   
N: 151

6000  
4000  
2000  
0

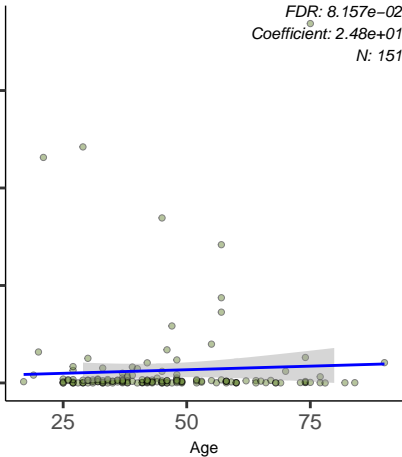

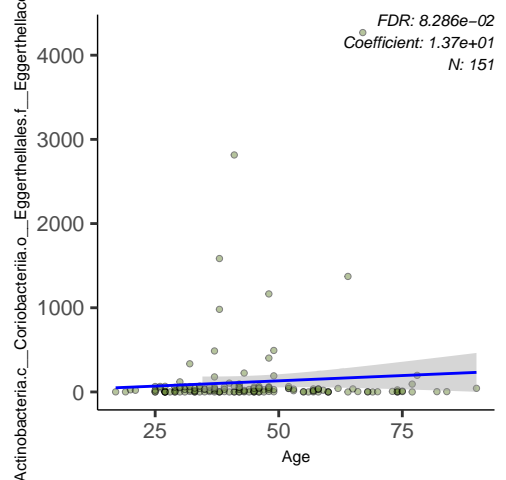

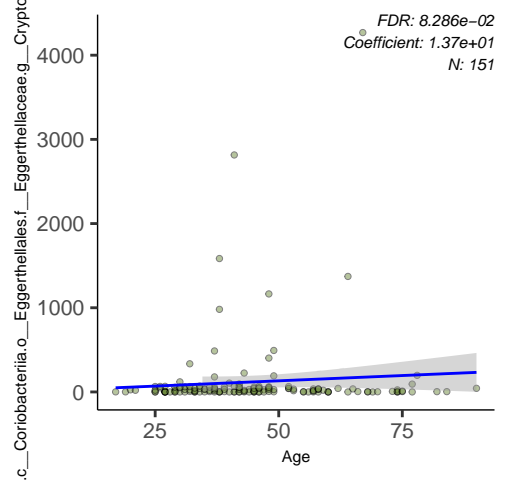

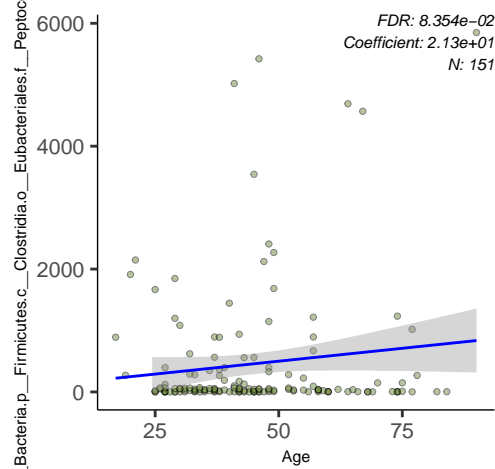

d\_Bacteria.p\_\_Firmicutes

*FDR: 8.485e-02*  
*Coefficient: 1.38e+05*  
*N: 151*

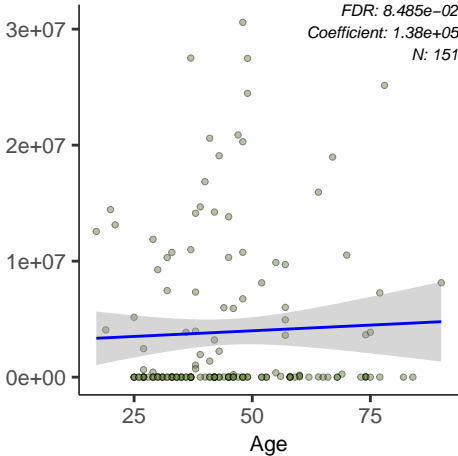



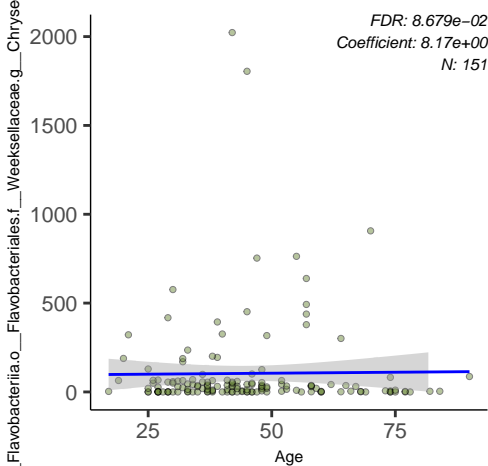

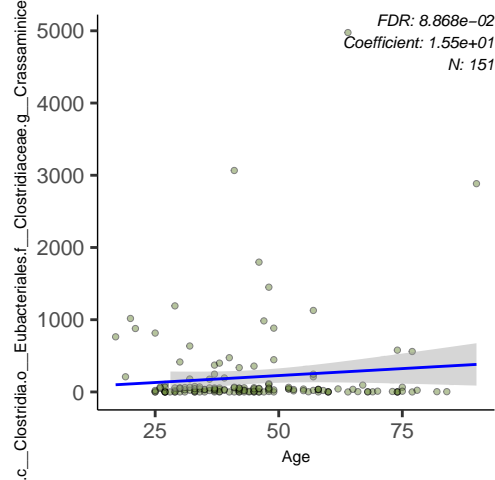

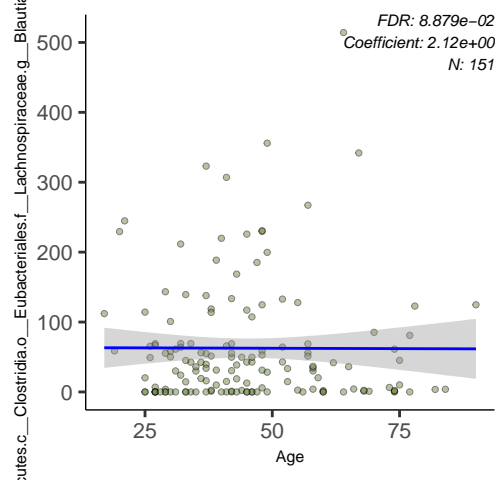

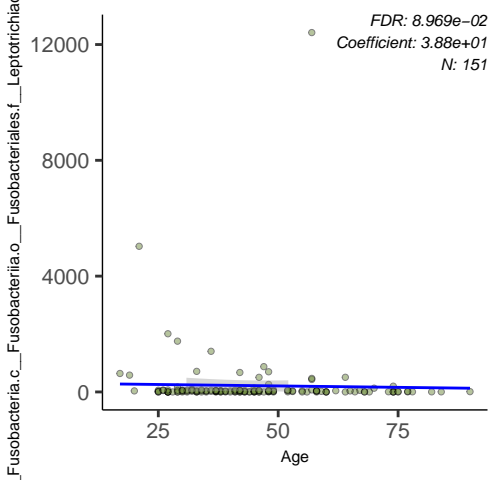

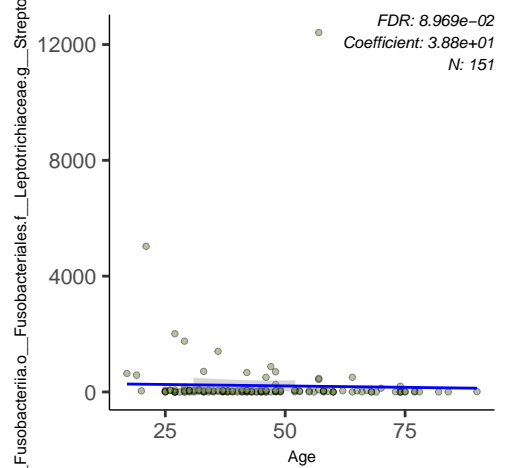

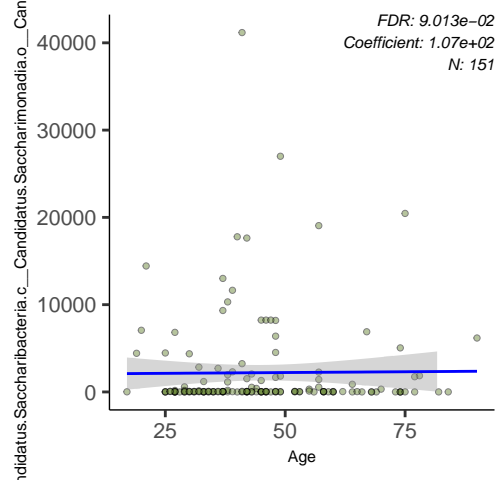



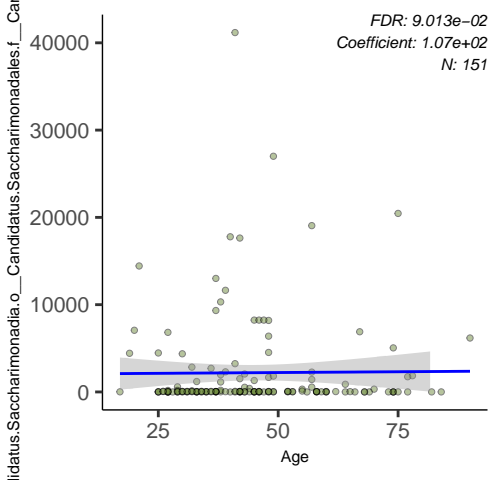



ia.o\_\_Candidatus.Saccharimonadales.f\_\_Candidatus.Saccharimonadales

*FDR: 9.013e-02*  
*Coefficient: 1.07e+02*  
*N: 151*

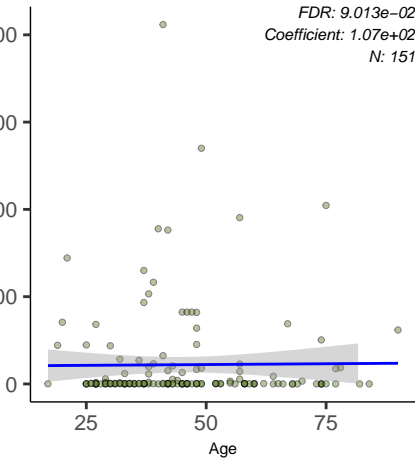

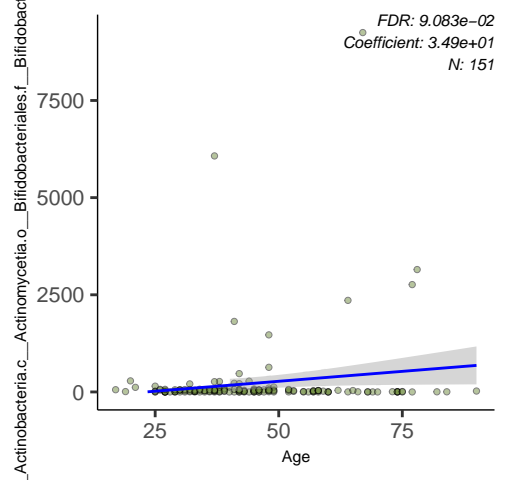

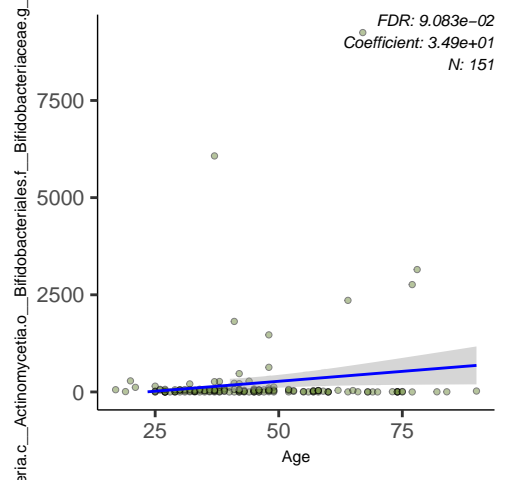

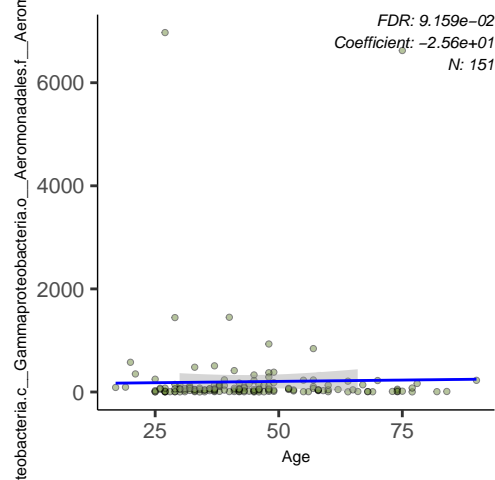

.p\_\_Proteobacteria.c\_\_Gammaproteobacteria.o\_\_Aeromonadales.f

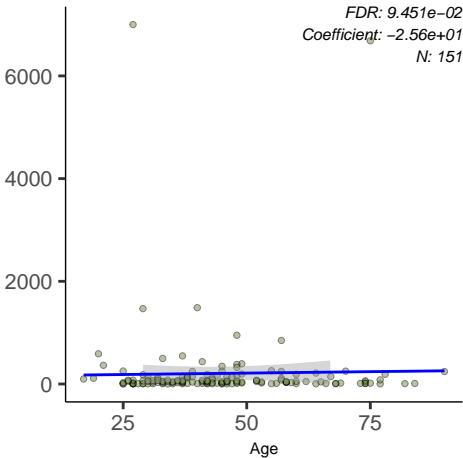

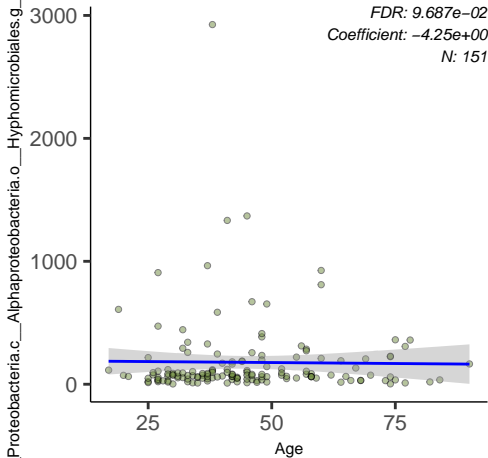

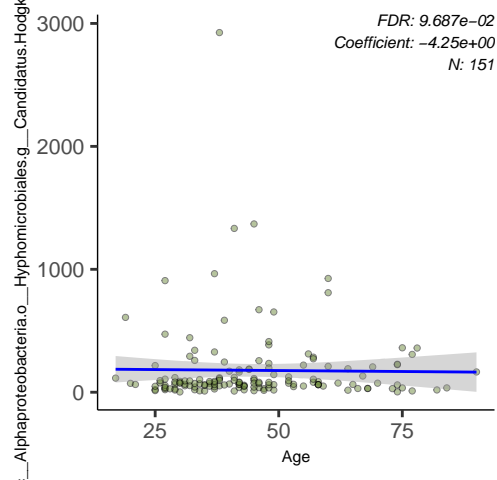

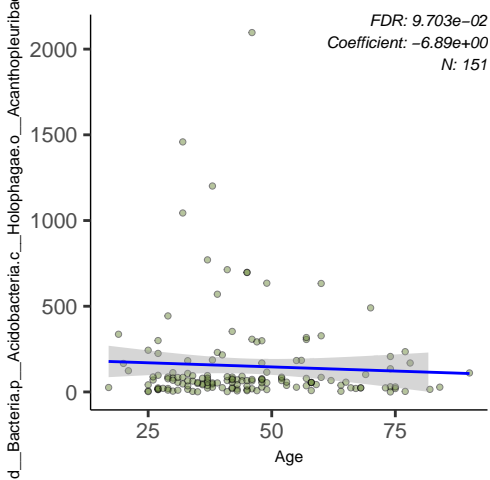



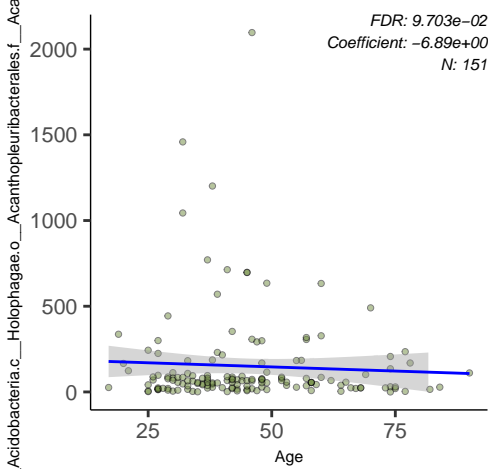

acteria.c\_\_Holophagae.o\_\_Acanthopleuribacterales.f\_\_Acanthopleu

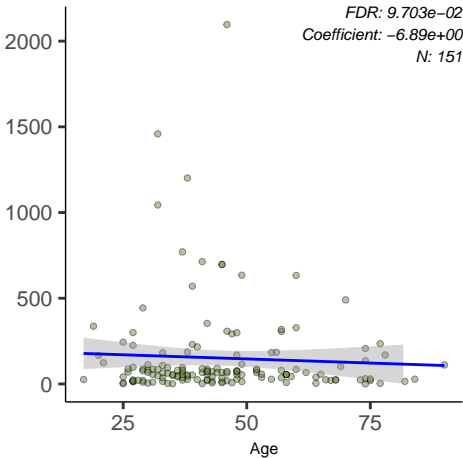

phagae.o\_\_Acanthopleuribacterales.f\_\_Acanthopleuribacteraceae



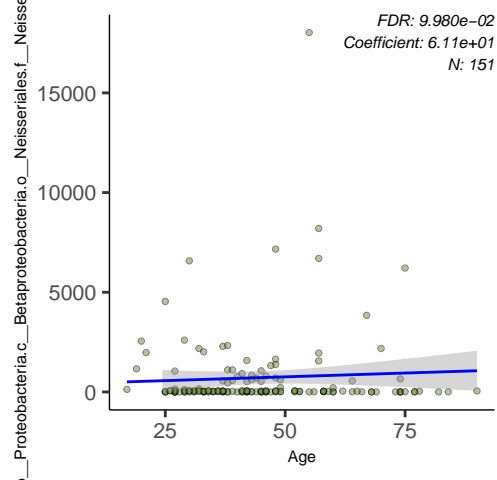

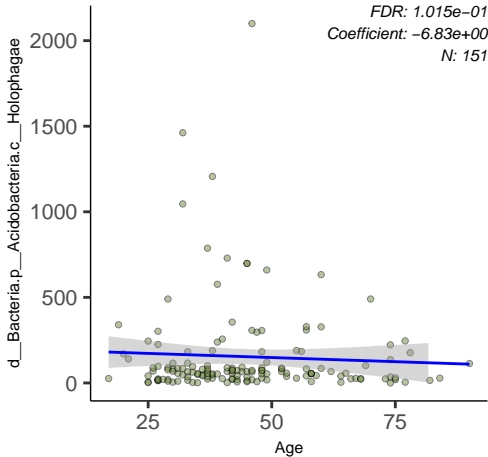

Clostridia.o\_\_Eubacteriales.f\_\_Eubacteriales.Family.XIII..Incertae.S

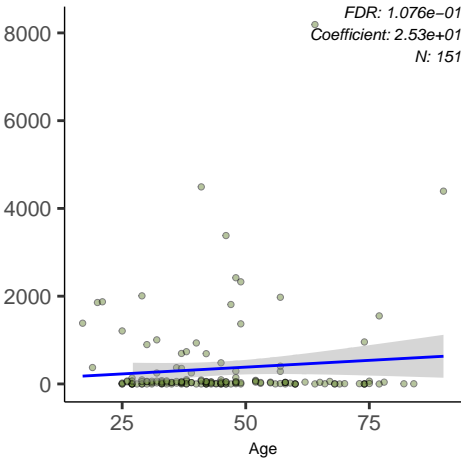

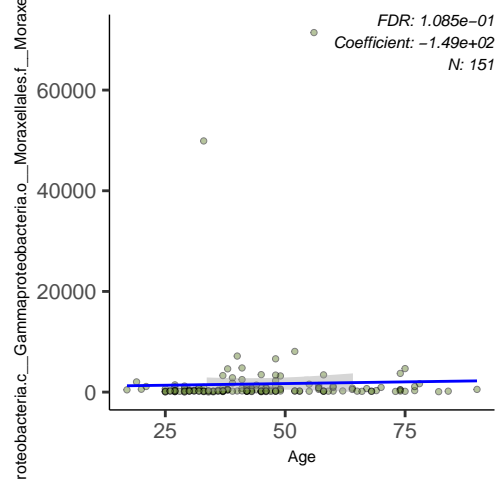

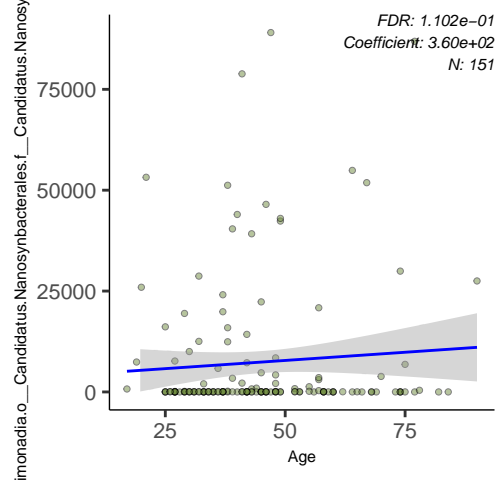



Firmicutes.c\_\_Erysipelotrichia.o\_\_Erysipelotrichales.f\_\_Erysipelotric

*FDR: 1.109e-01*  
*Coefficient: 5.08e+01*  
*N: 151*

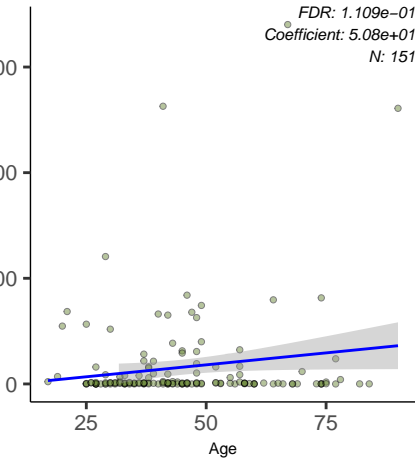

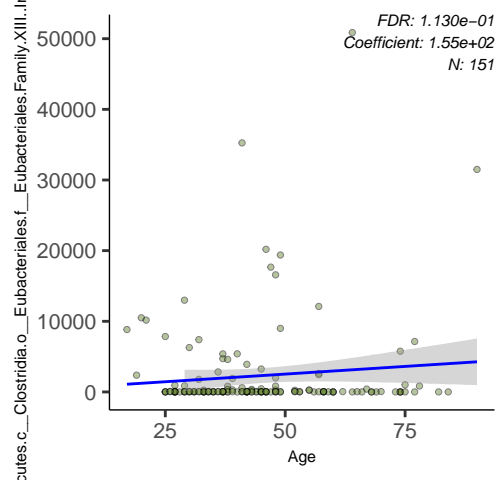

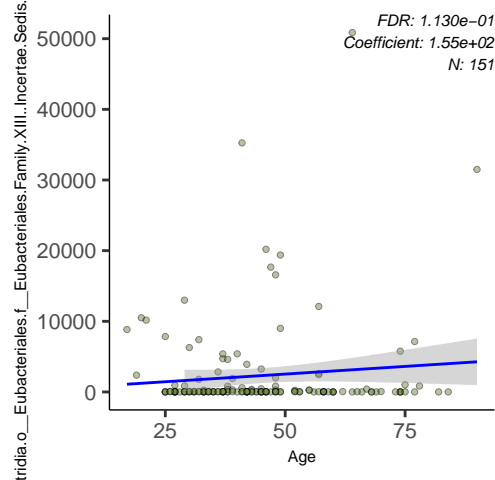

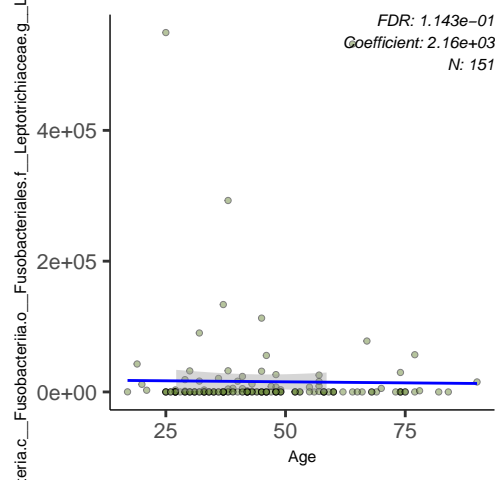

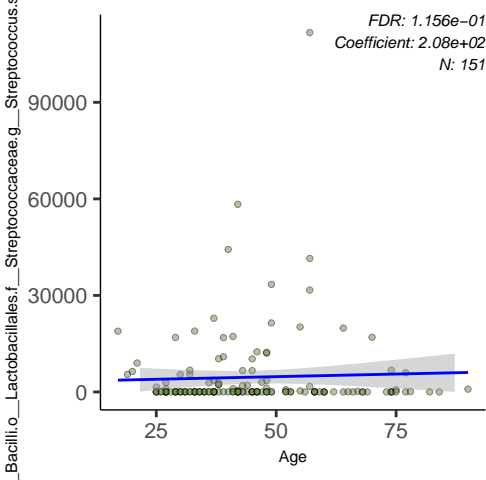

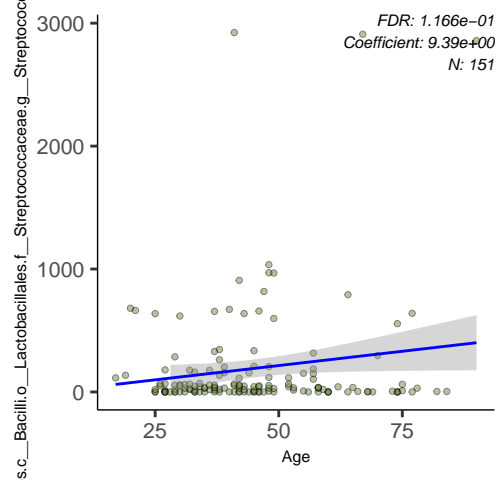

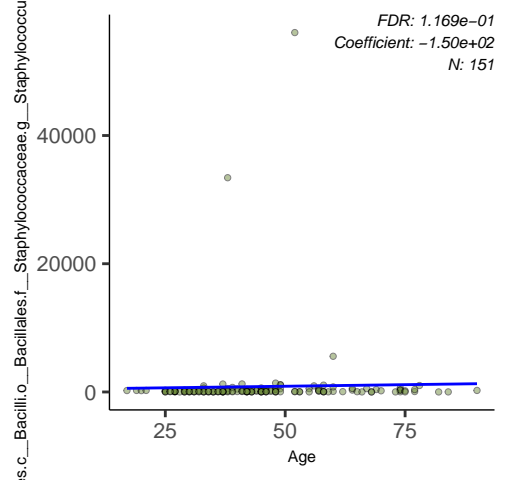

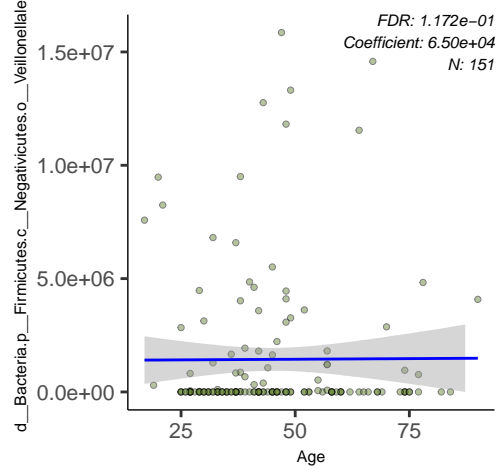



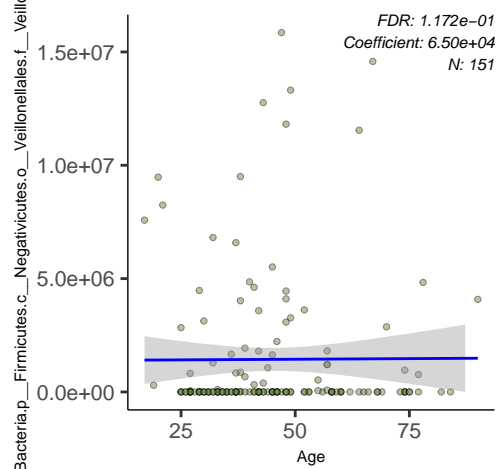

d\_Bacteria.p\_\_Firmicutes.c\_\_Negativicutes

FDR: 1.182e-01  
Coefficient: 7.11e+04  
N: 151

1.5e+07  
1.0e+07  
5.0e+06  
0.0e+00

25

50

75

Age

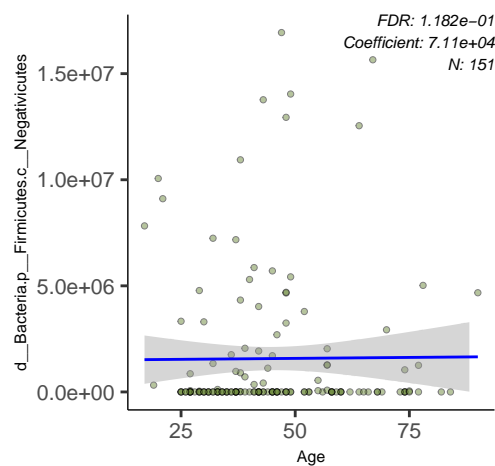

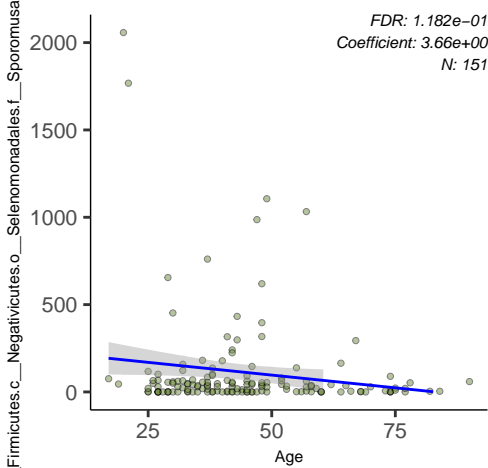

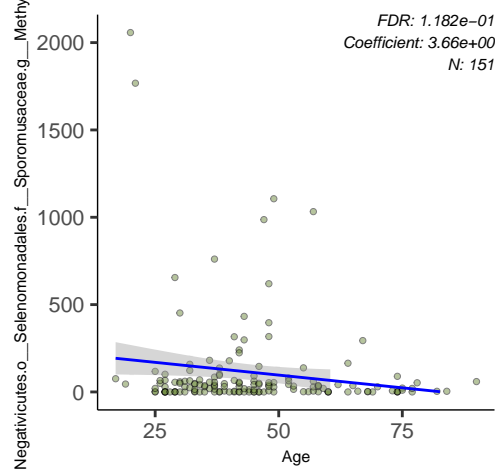

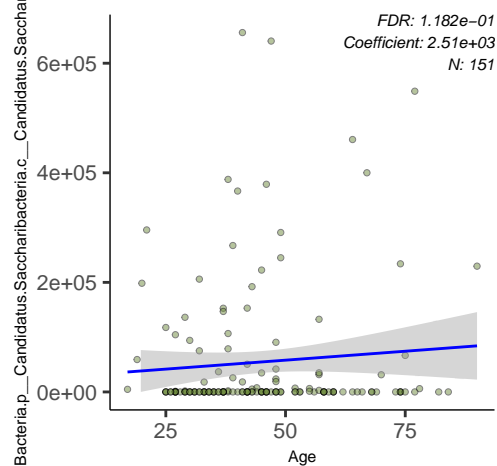

d\_\_Bacteria.p\_\_Candidatus.Saccharibacteria

FDR: 1.185e-01

Coefficient: 2.63e+03

N: 151

6e+05

4e+05

2e+05

0e+00

25

50

75

Age

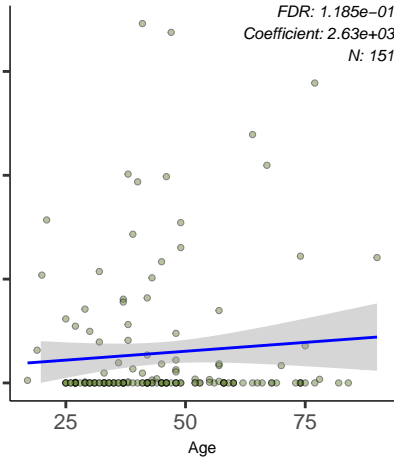

Actinomycetia.o\_\_Candidatus.Nanopelagicales.f\_\_Candidatus.Nano

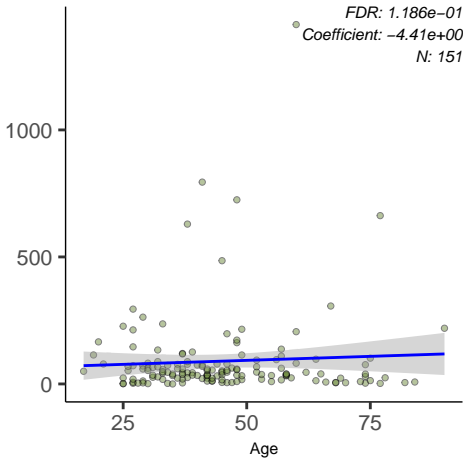

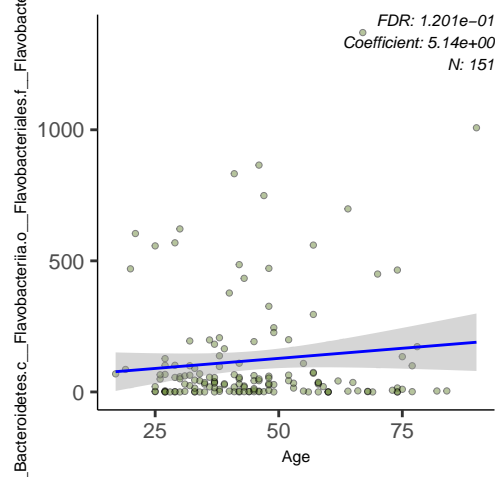



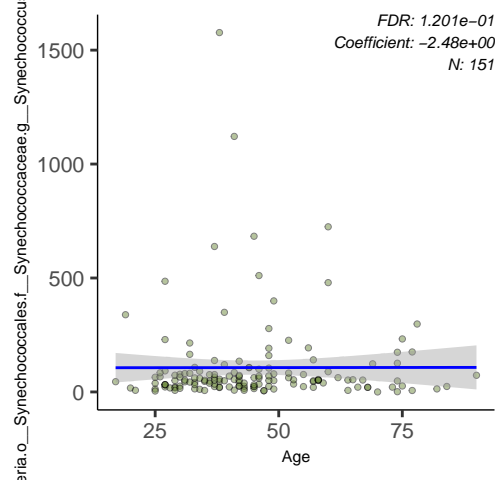

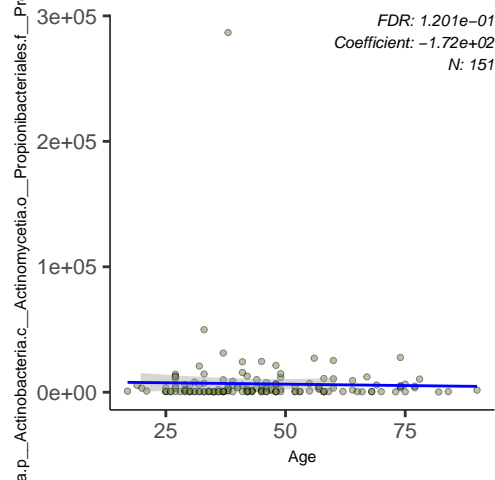

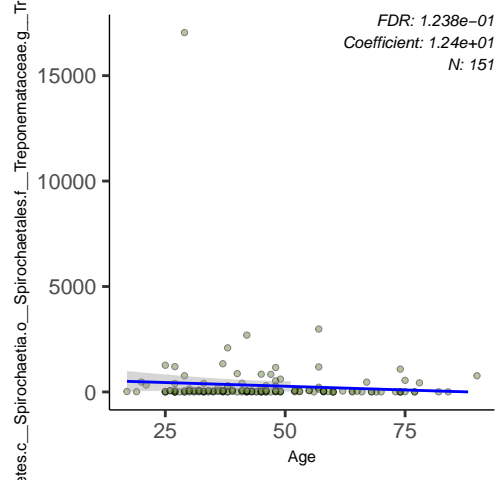

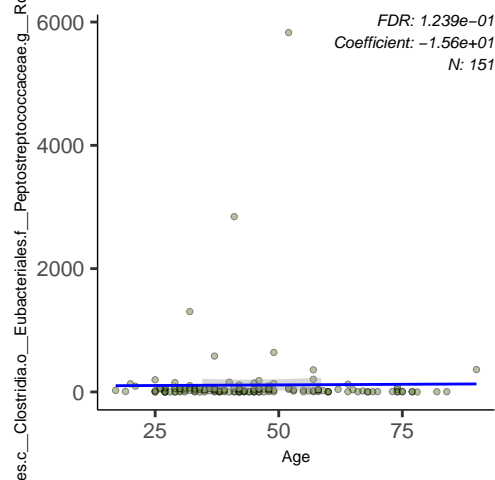

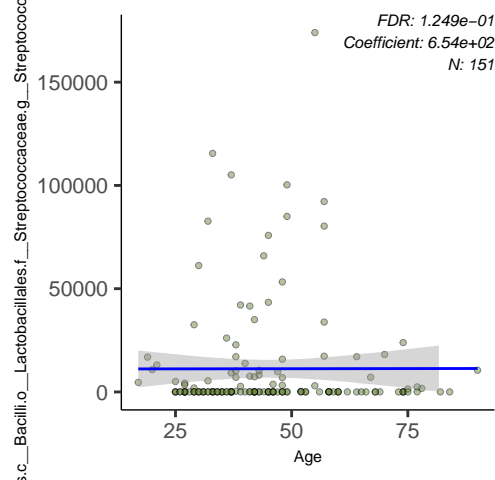

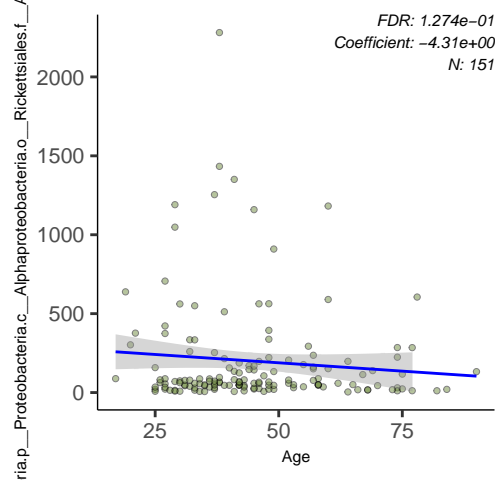

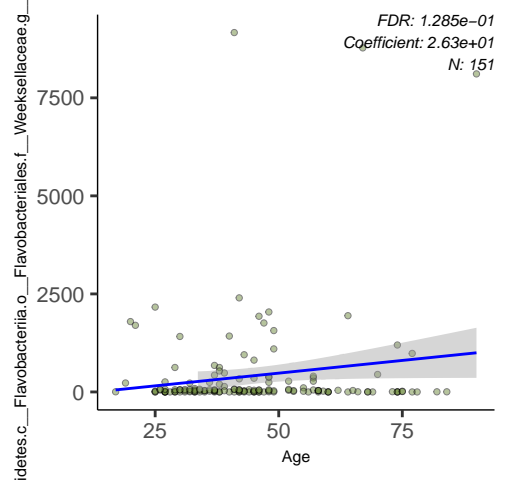

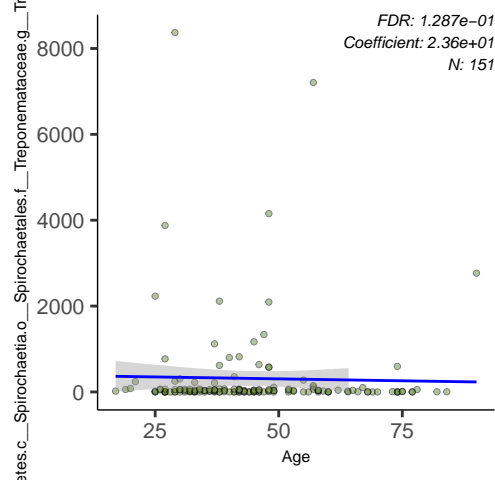



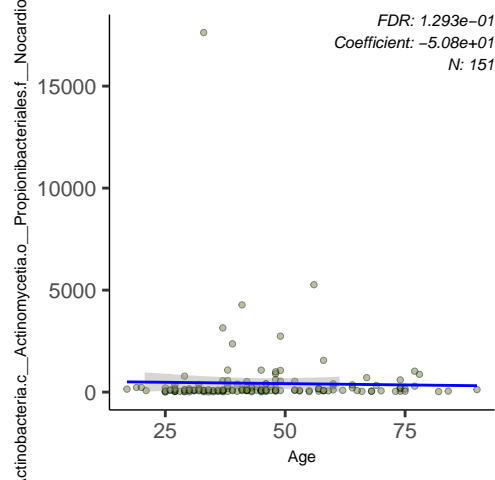

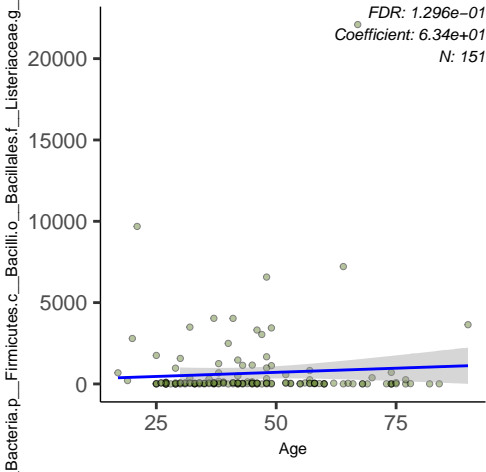

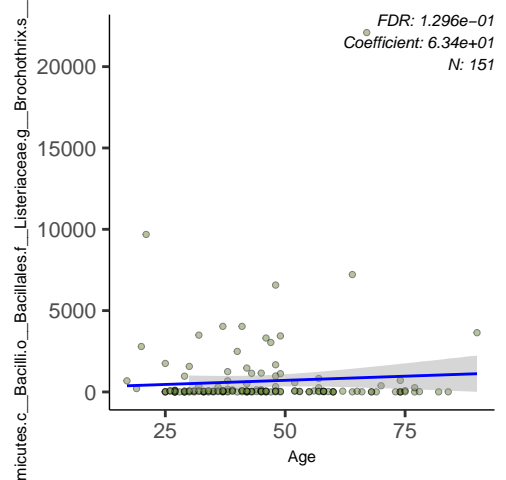

es.c\_Bacilli.o\_Lactobacillales.f\_Streptococcaceae.g\_Streptococ

*FDR: 1.297e-01*  
*Coefficient: 4.57e+01*  
*N: 151*

15000

10000

5000

0

25

50

75

Age

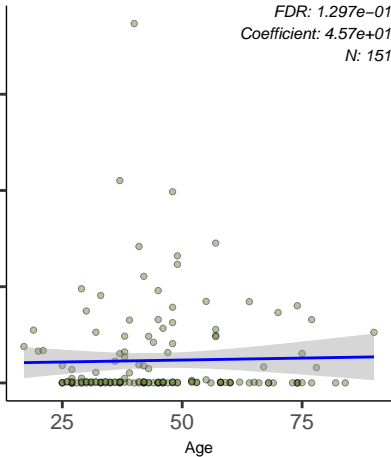

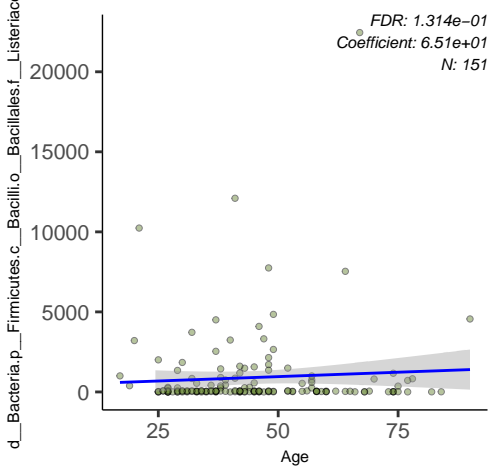

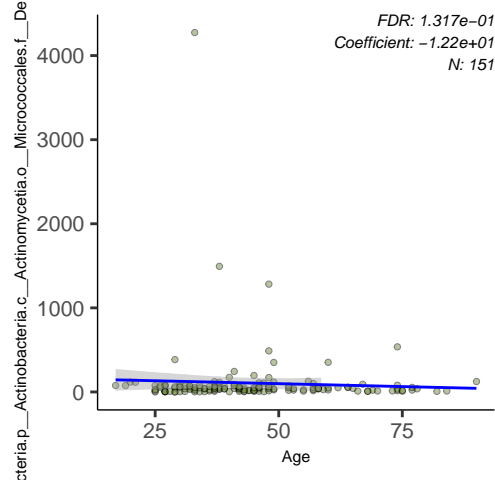

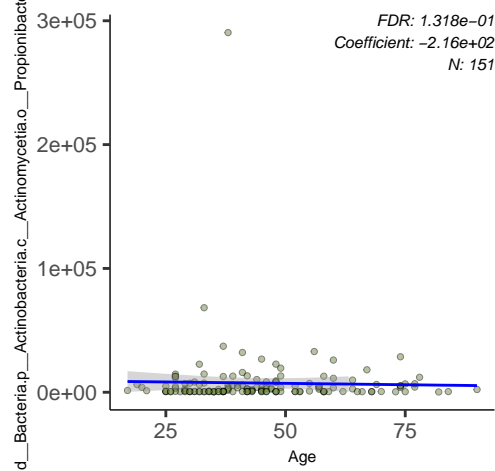

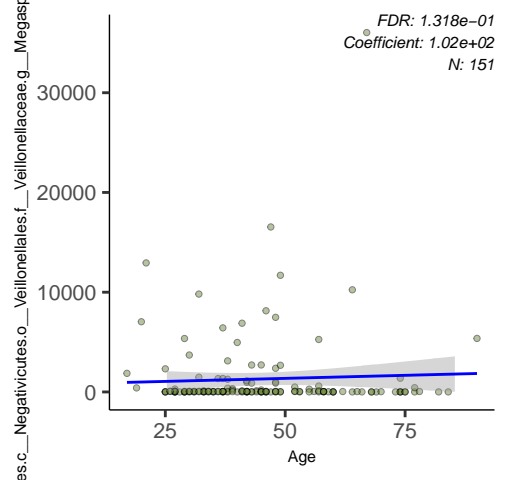



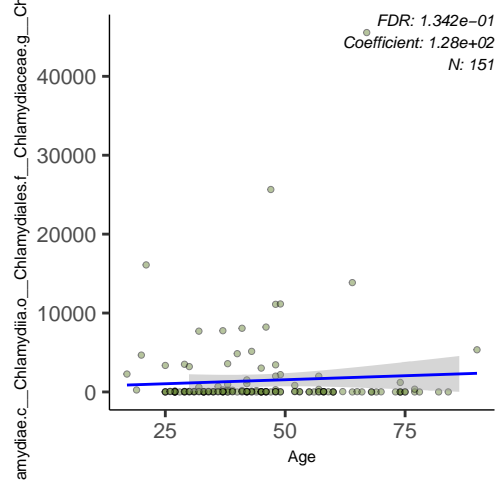

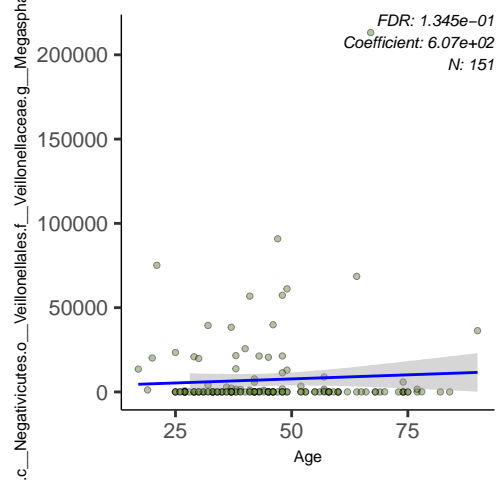

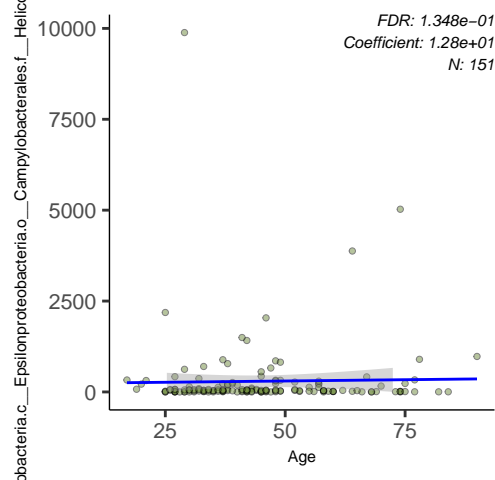

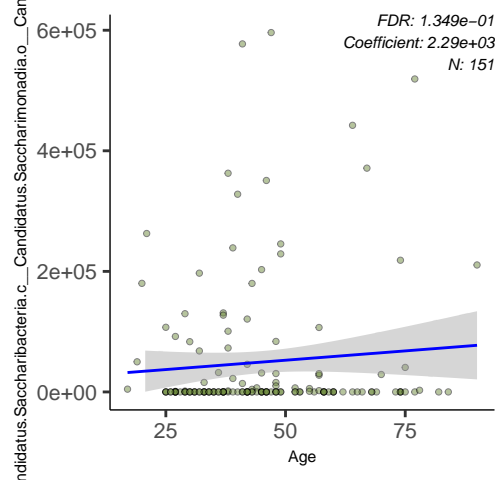

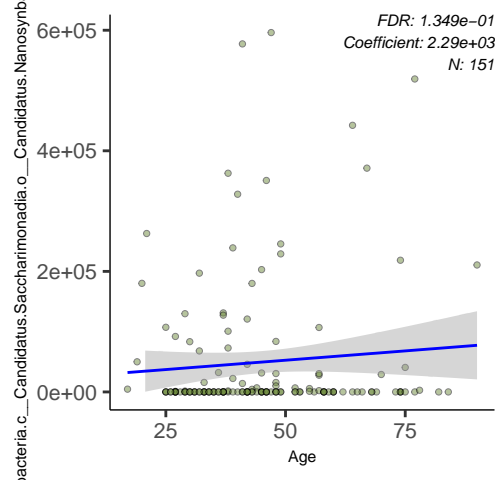

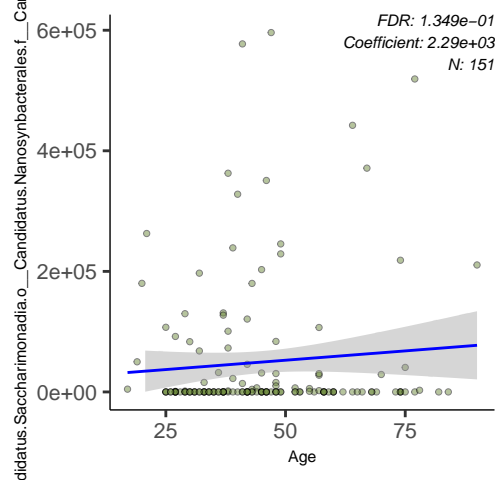

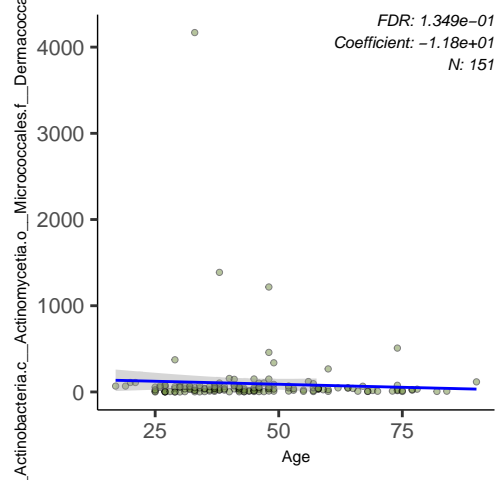

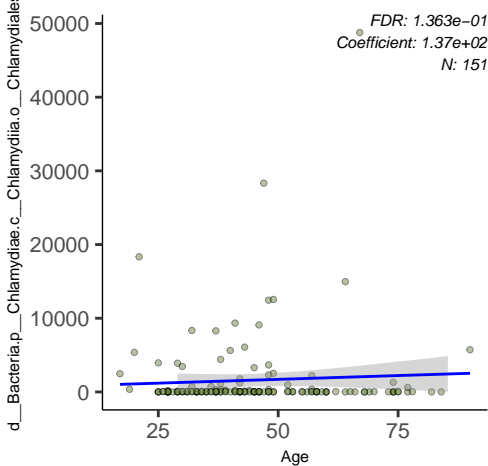



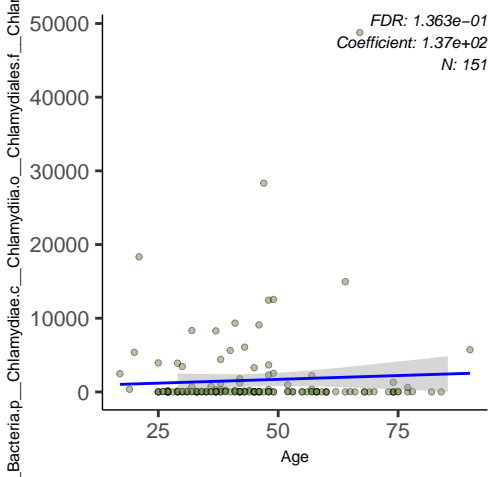

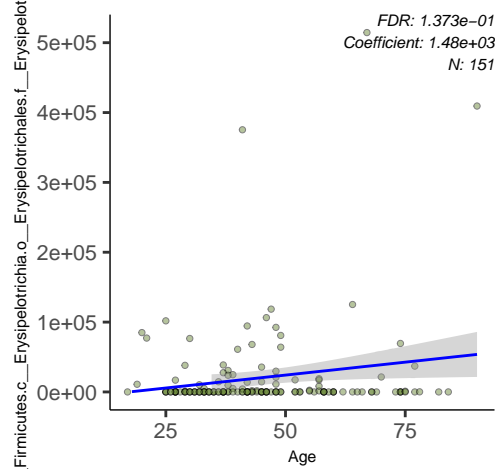

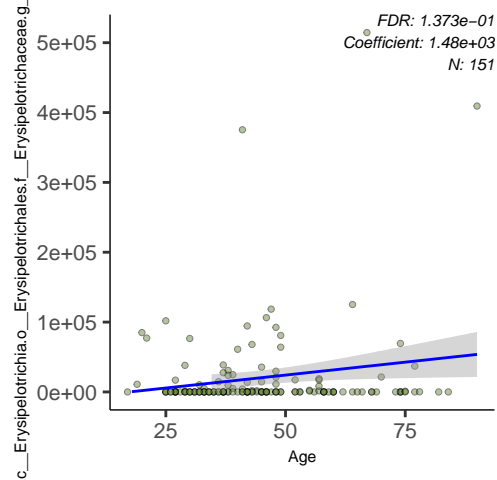

Firmicutes.c\_\_Erysipelotrichia.o\_\_Erysipelotrichales.f\_\_Erysipelotrichi

*FDR: 1.383e-01*  
*Coefficient: 6.77e+00*  
*N: 151*

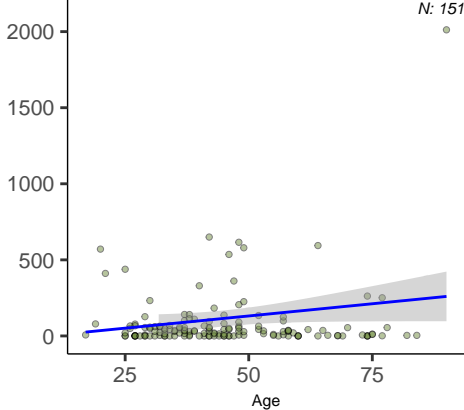

\_\_Erysipelotrichia.o\_\_Erysipelotrichales.f\_\_Erysipelotrichaceae.g

*FDR: 1.383e-01*  
*Coefficient: 6.77e+00*  
*N: 151*

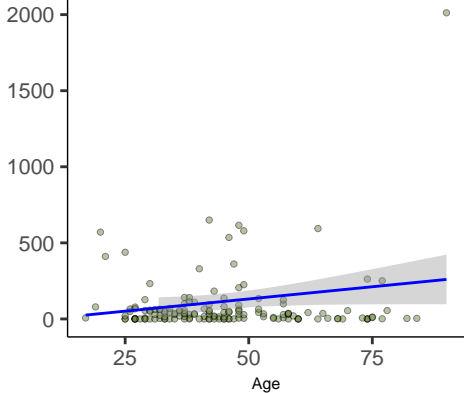

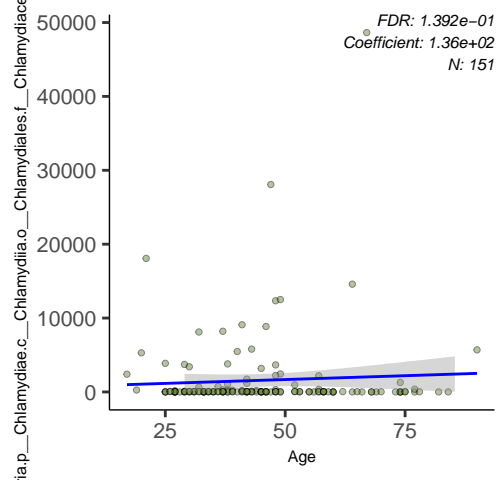

mmaproteobacteria.o\_\_Pseudomonadales.f\_\_Pseudomonadaceae.g

FDR:  $1.407e-01$   
Coefficient:  $-1.67e+02$   
N: 151

40000

20000

0

25

50

75

Age

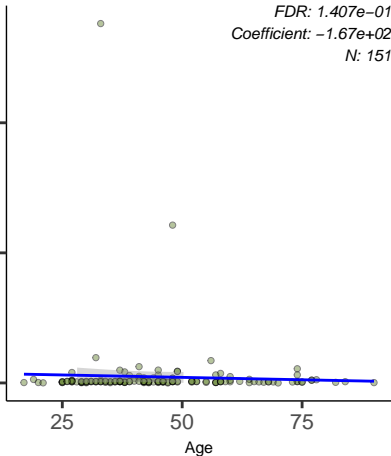

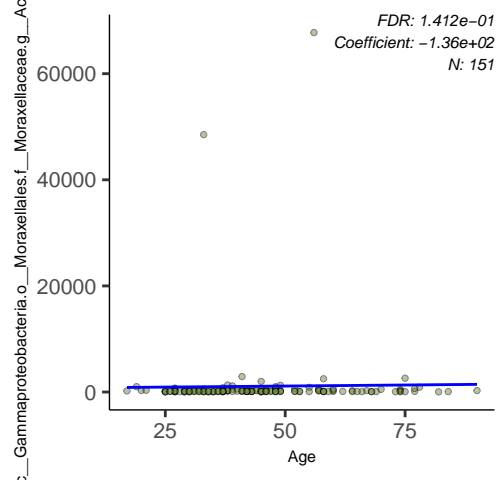



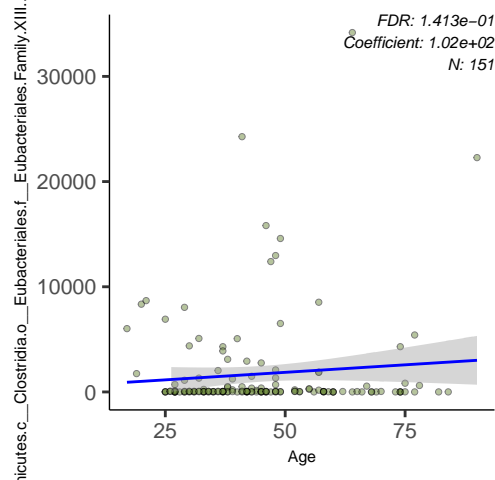

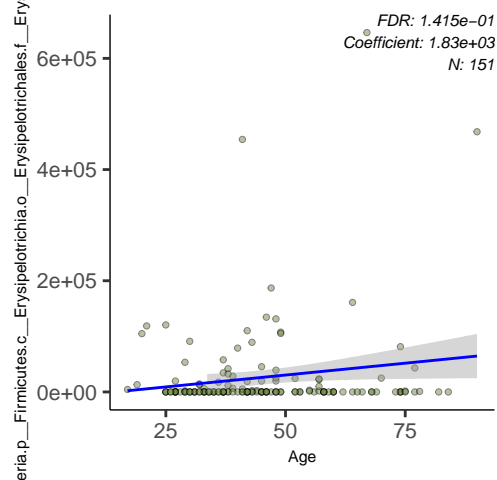

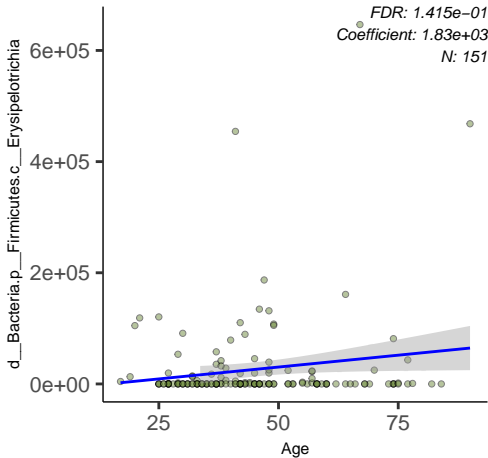

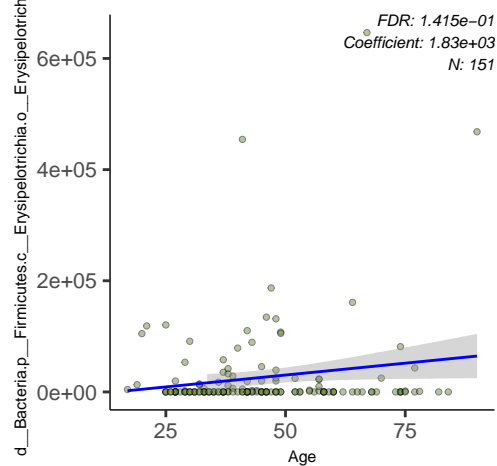

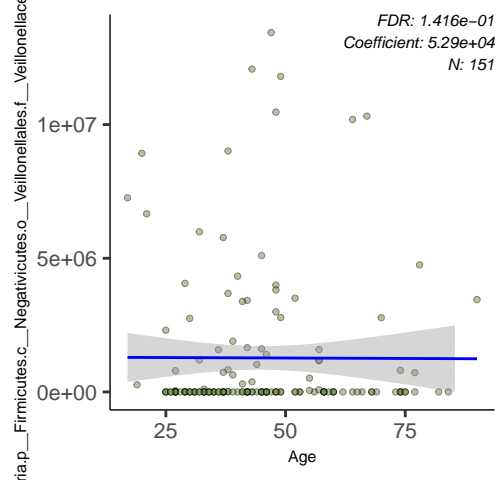

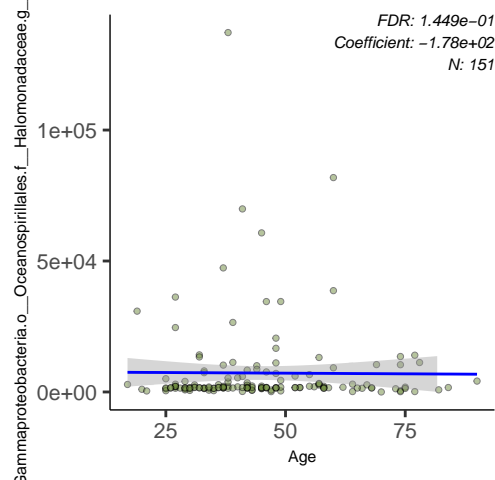

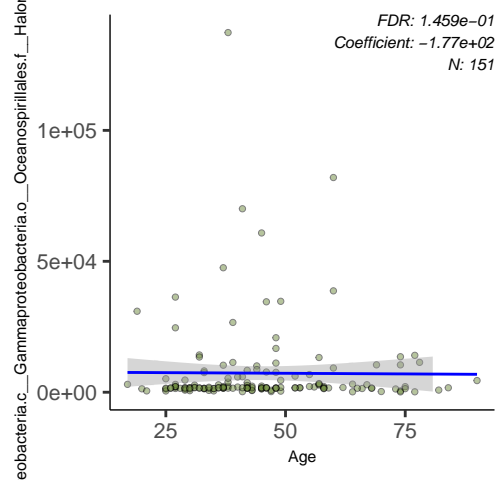

a.p\_\_Firmicutes.c\_\_Clostridia.o\_\_Eubacteriales.f\_\_Clostridiaceae.g

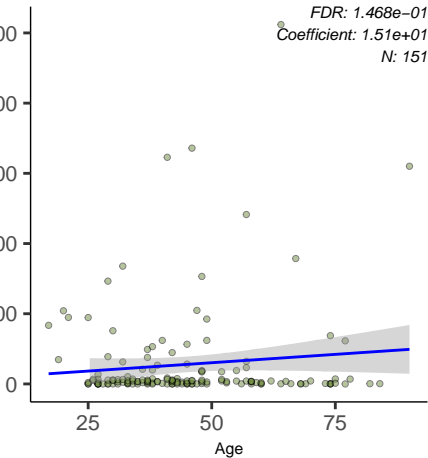



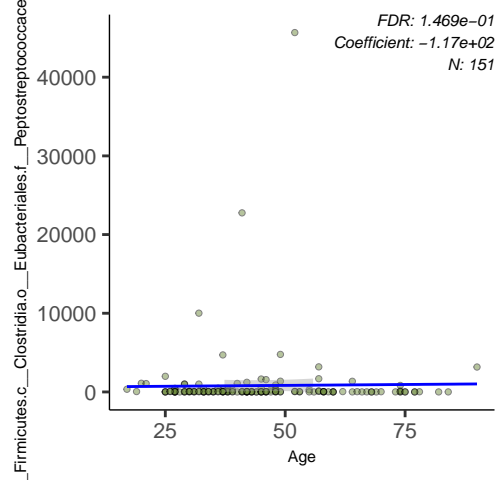

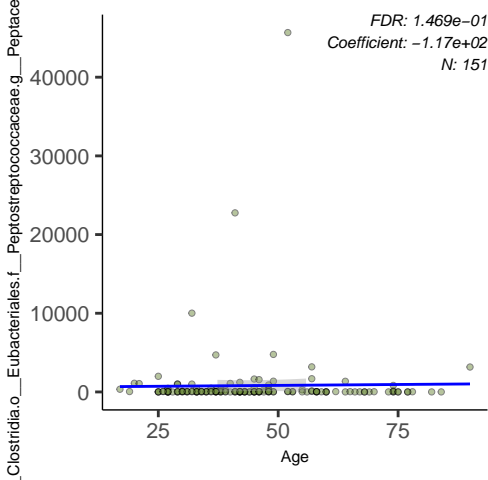

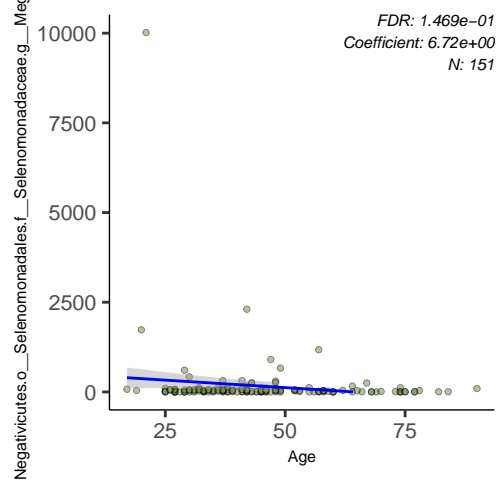

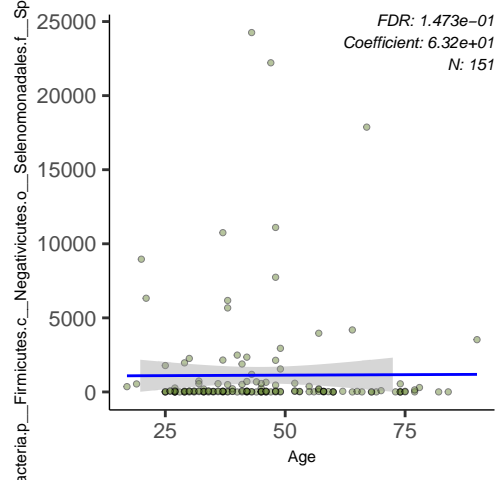

obacteria.c\_\_Betaproteobacteria.o\_\_Burkholderiales.f\_\_Comamonad

*FDR: 1.474e-01*  
*Coefficient: -1.83e+02*  
*N: 151*

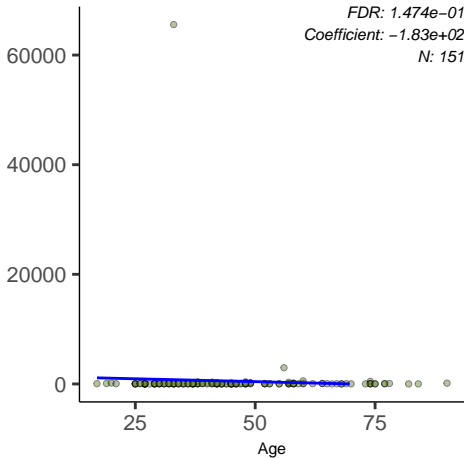

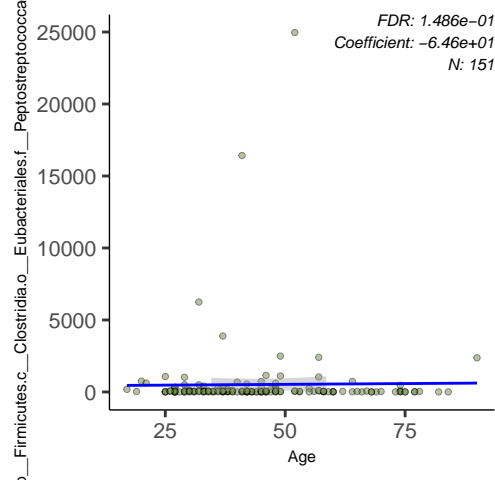

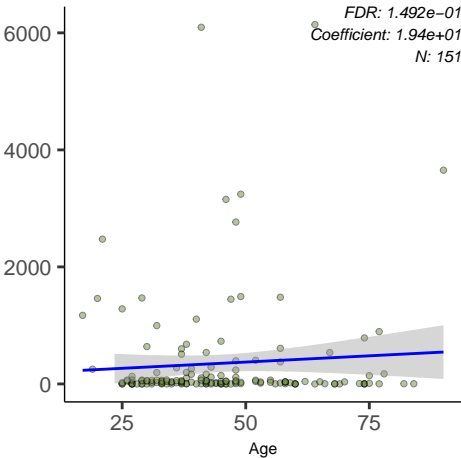

...Proteobacteria.c\_\_Epsilonproteobacteria.o\_\_Campylobacterales.

*FDR: 1.496e-01*  
*Coefficient: 1.25e+01*  
*N: 151*

15000

10000

5000

0

25

50

75

Age

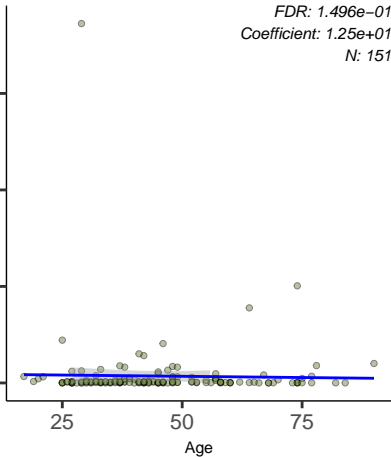



a.p\_\_Firmicutes.c\_\_Tissierellia.o\_\_Tissierellales.f\_\_Tissierellaceae.g

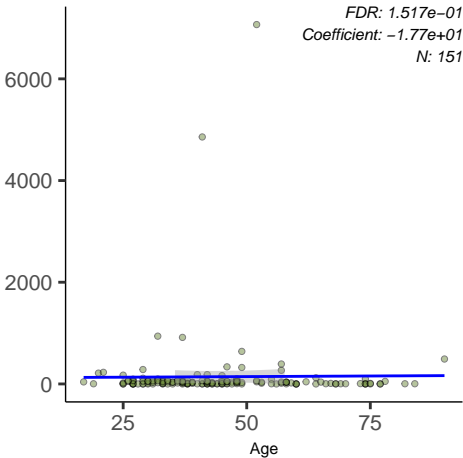

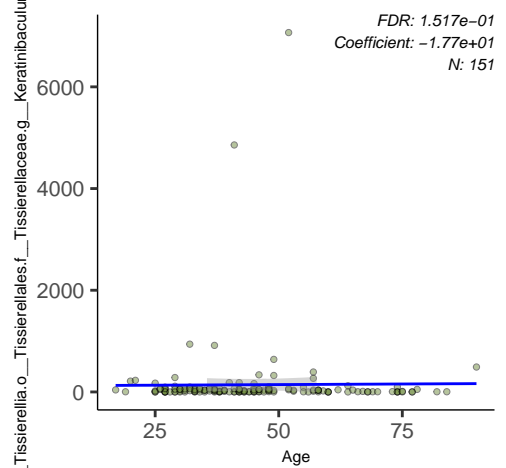

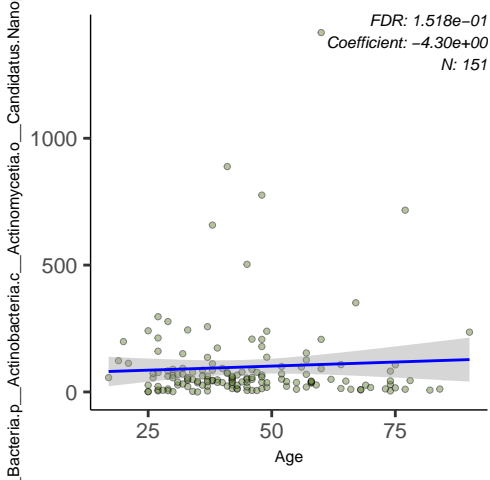

mobacteria.c\_\_Actinomycetia.o\_\_Candidatus.Nanopelagiales.f\_\_Ca

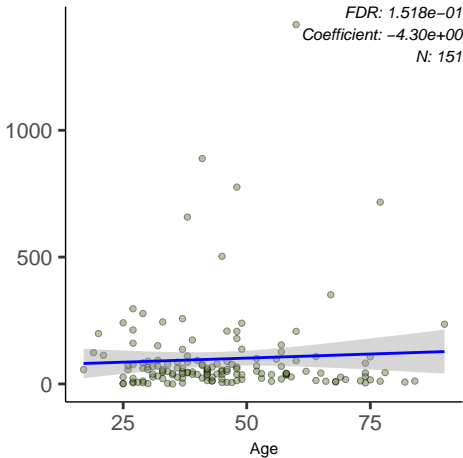

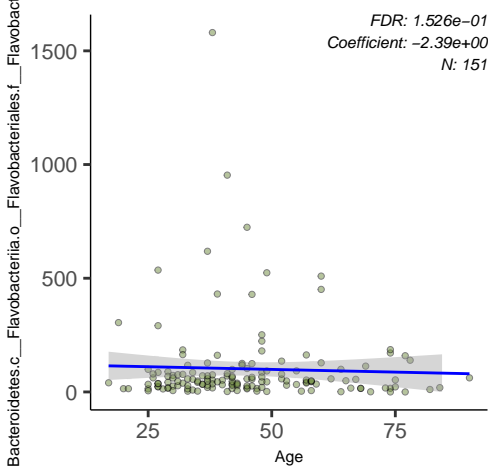

oidetes.c\_\_Flavobacteriia.o\_\_Flavobacteriales.f\_\_Flavobacteriaceae

*FDR: 1.526e-01*  
*Coefficient: -2.39e+00*  
*N: 151*

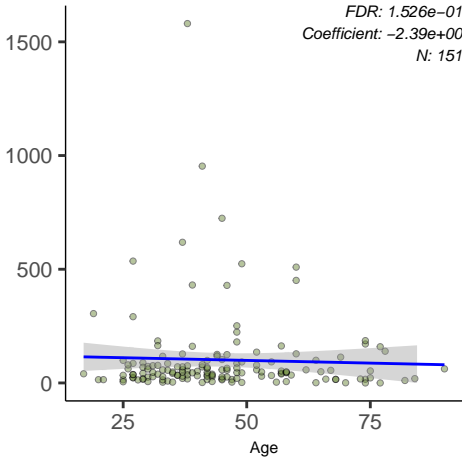

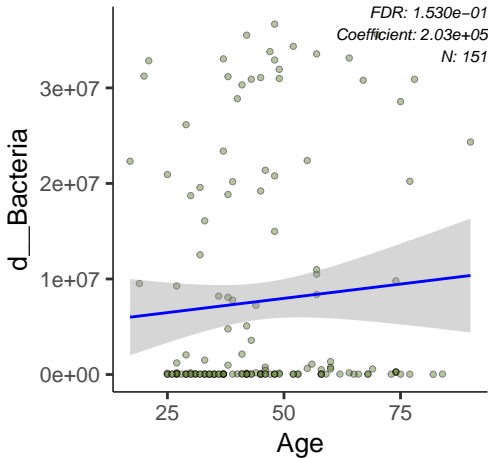

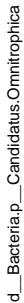

FDR: 1.530e-01  
Coefficient: 1.29e+01  
N: 151

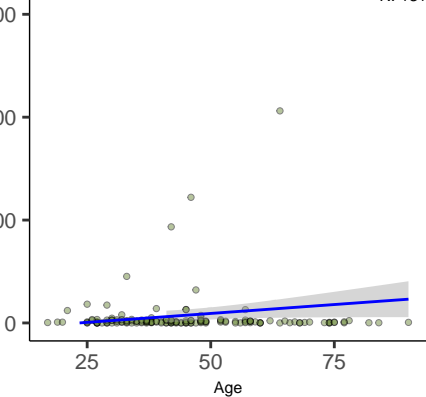



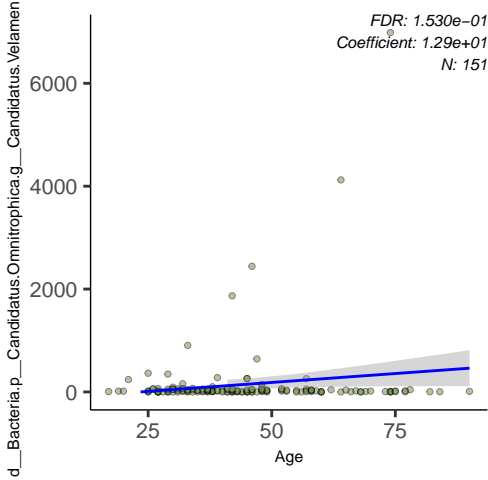

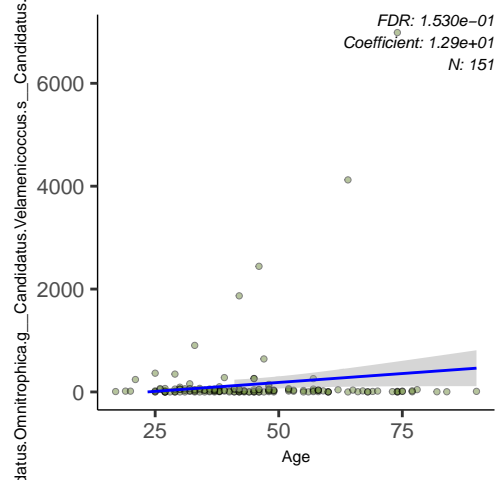

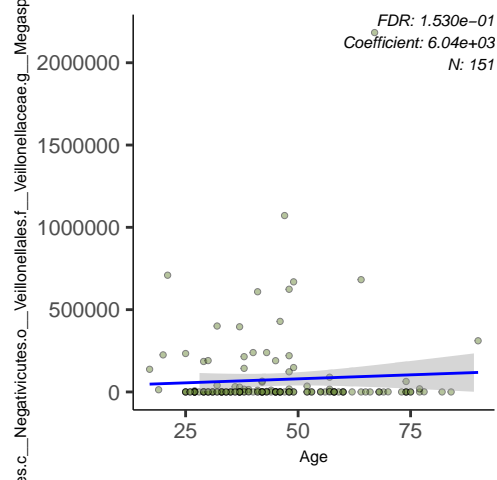

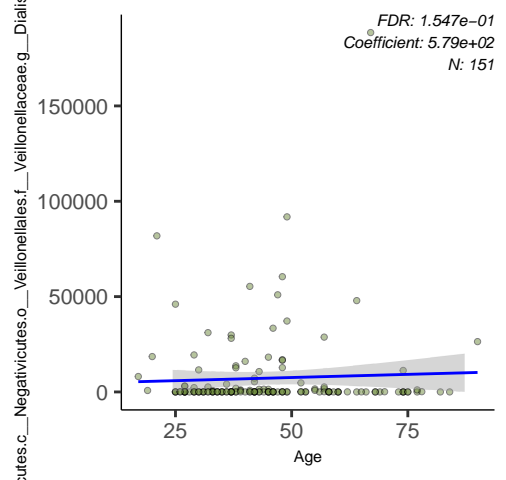

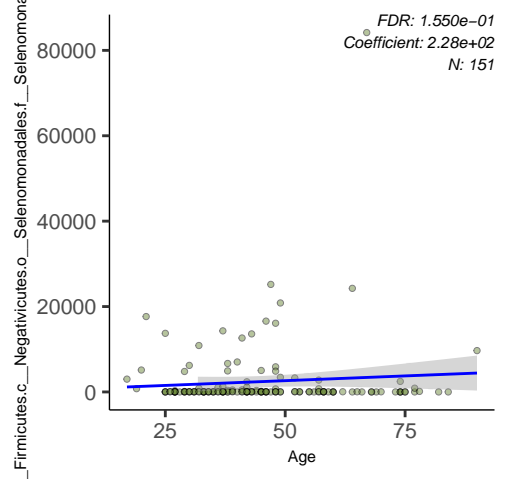

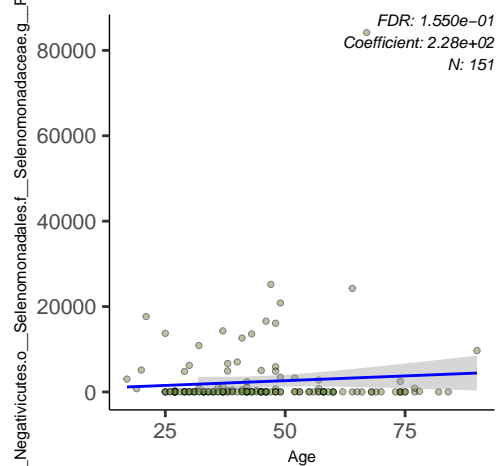

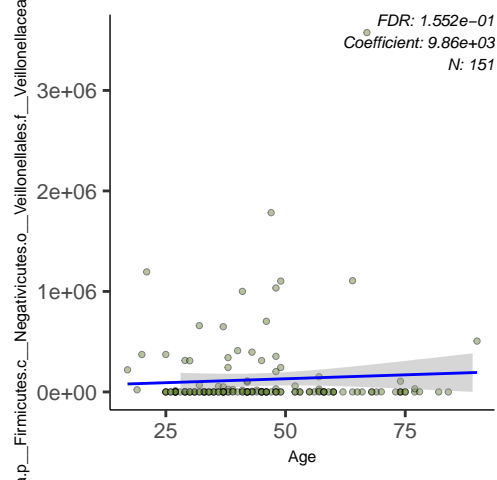

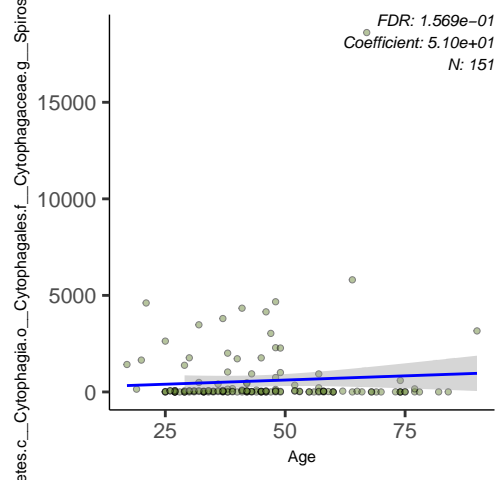



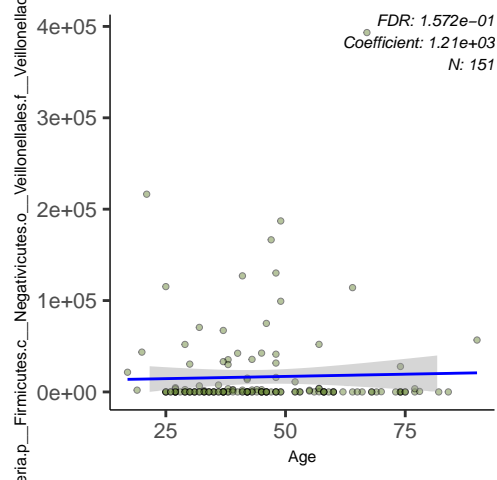

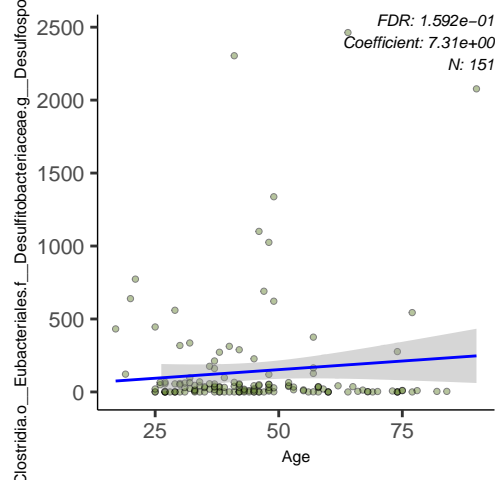

eria.p\_\_Firmicutes.c\_\_Clostridia.o\_\_Eubacteriales.f\_\_Clostridiaceae

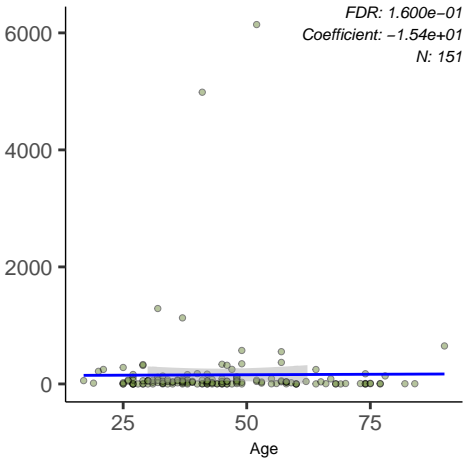

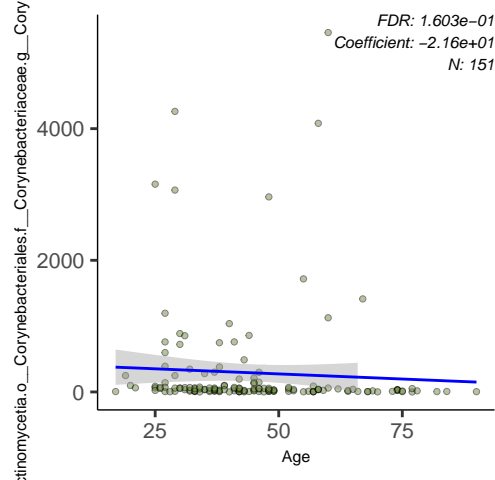

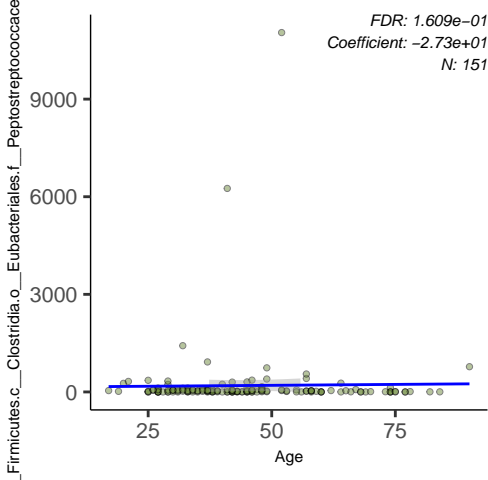

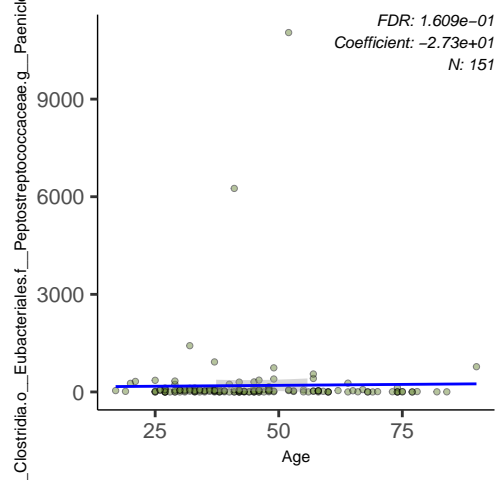

p\_\_Proteobacteria.c\_\_Gammaproteobacteria.o\_\_Oceanospirillales.

FDR: 1.614e-01  
Coefficient: -1.74e+02  
N: 151

1e+05  
5e+04  
0e+00

25

50

75

Age

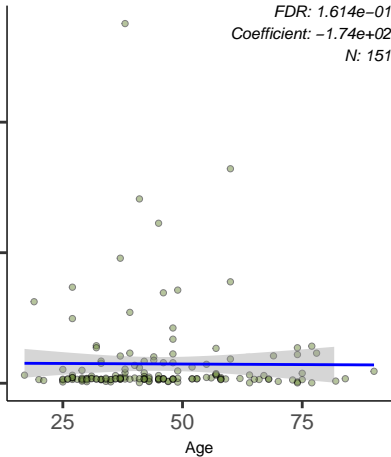

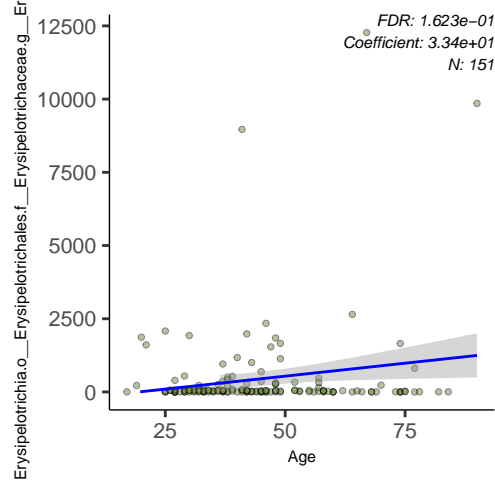



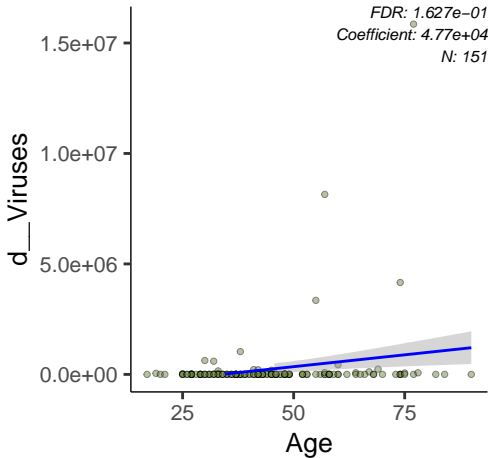

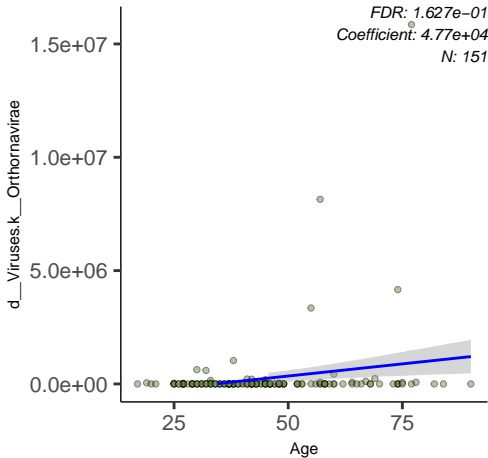

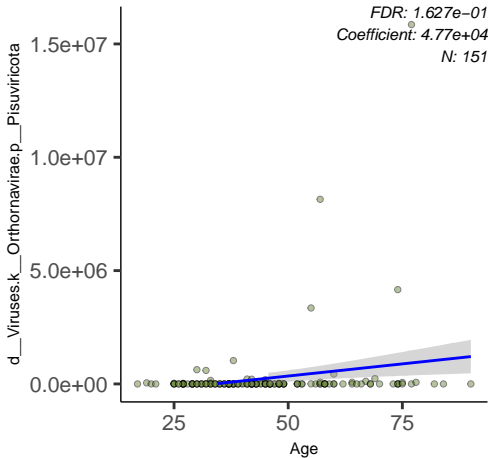

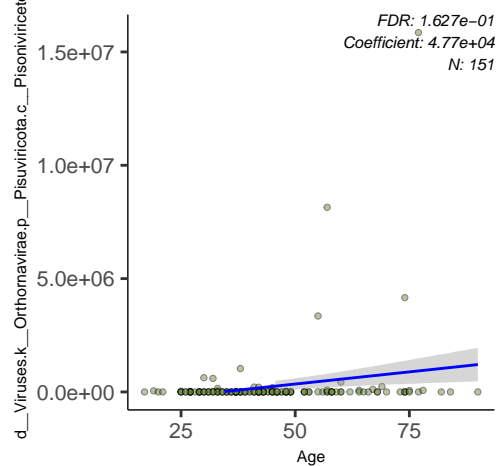

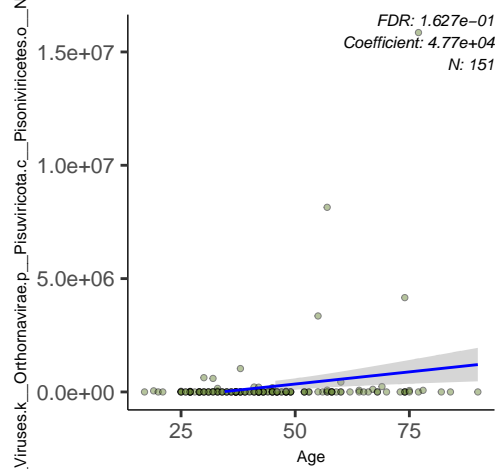

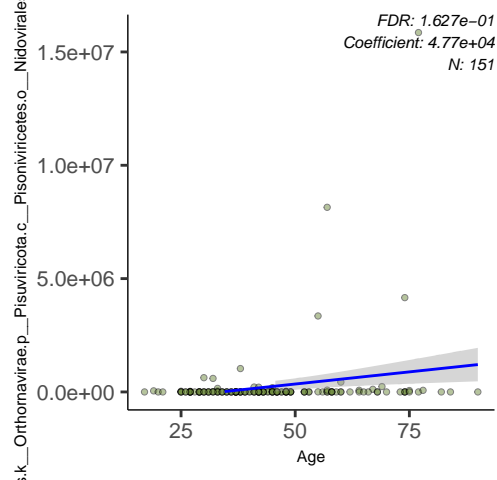

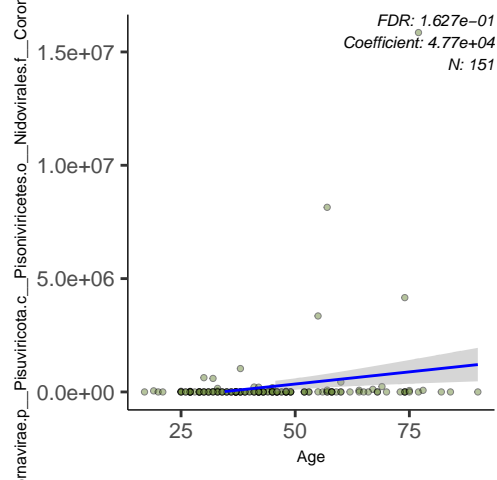

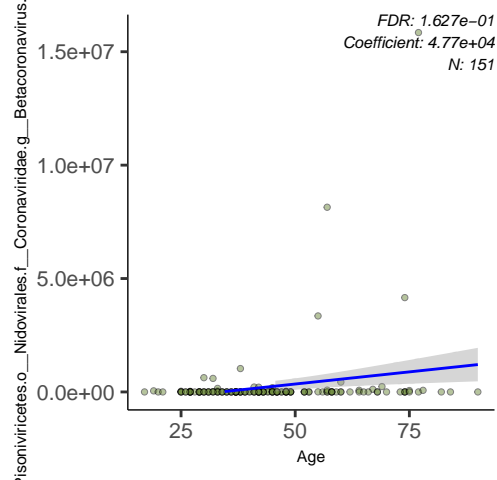



tes.c\_\_Clostridia.o\_\_Eubacteriales.f\_\_Clostridiaceae.g\_\_Alkaliphilus

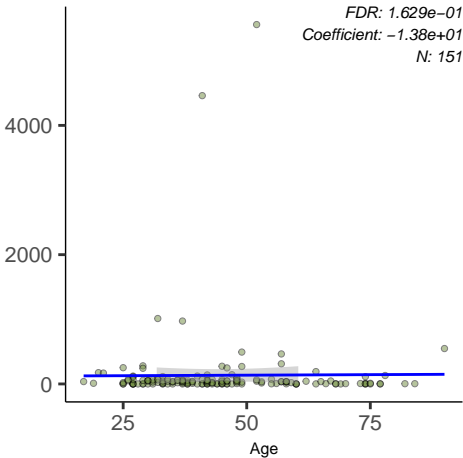

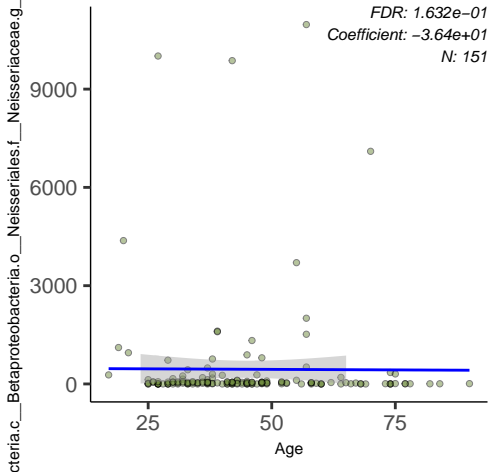

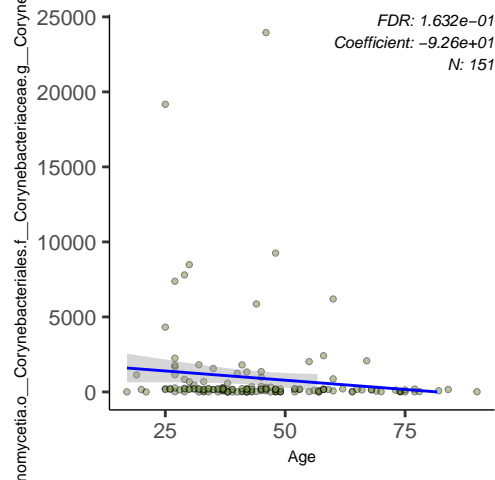

\_\_Epsilonproteobacteria.o\_\_Campylobacterales.f\_\_Helicobacteraceae

*FDR: 1.644e-01*  
*Coefficient: 4.37e+00*  
*N: 151*

1000

500

0

25

50

75

Age

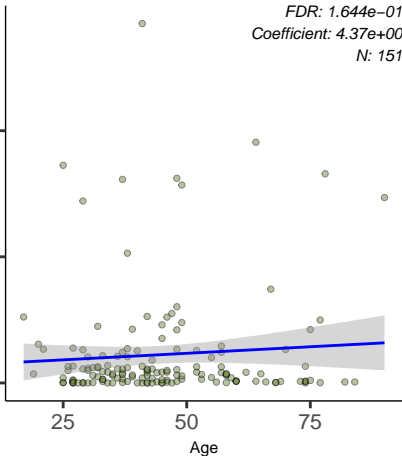

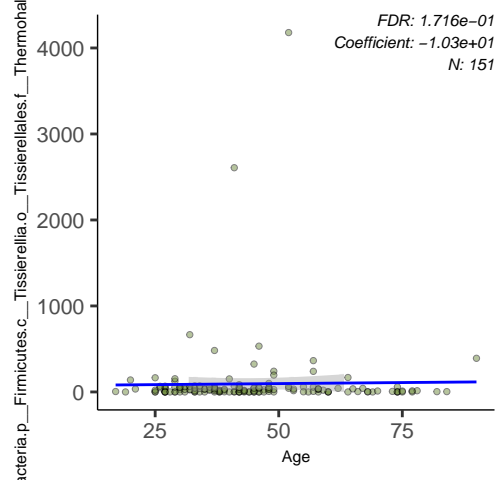

Firmicutes.c\_\_Tissierellia.o\_\_Tissierellales.f\_\_Thermohalobacterace

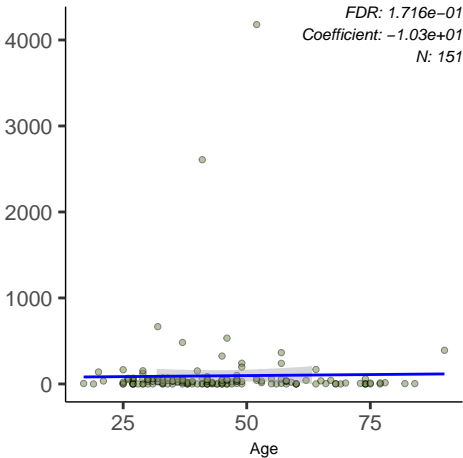

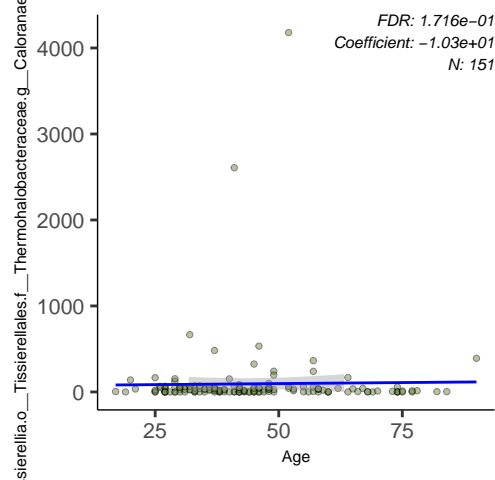

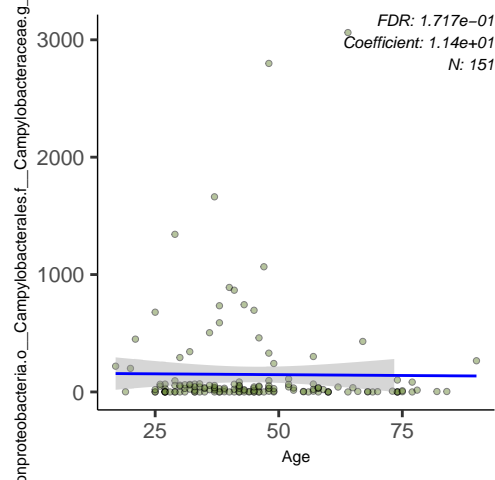



icutes.c\_Bacilli.o\_Lactobacillales.f\_Lactobacillaceae.g\_Lactoba

*FDR: 1.718e-01*  
*Coefficient: -4.65e+00*  
*N: 151*

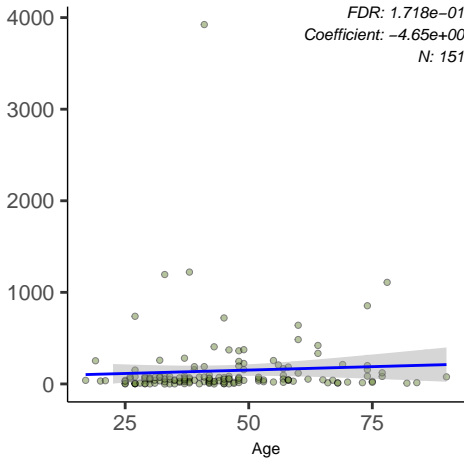

es.c\_Bacilli.o\_Lactobacillales.f\_\_Streptococcaceae.g\_\_Streptococ

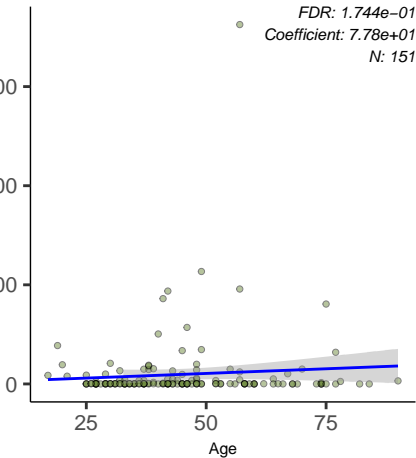

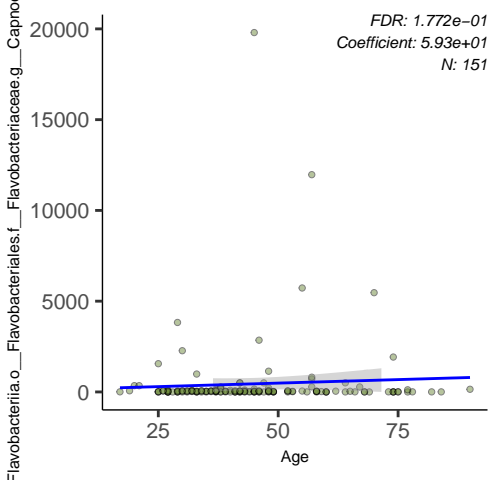

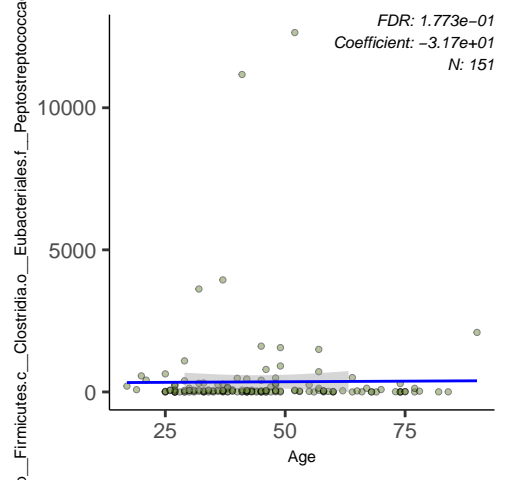

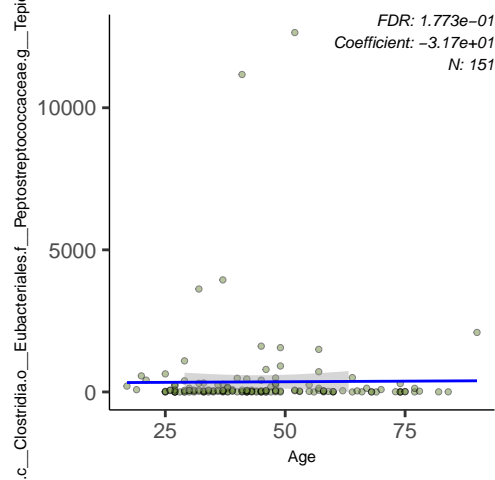

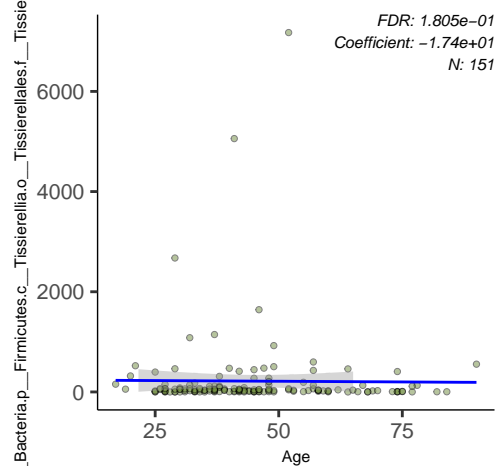

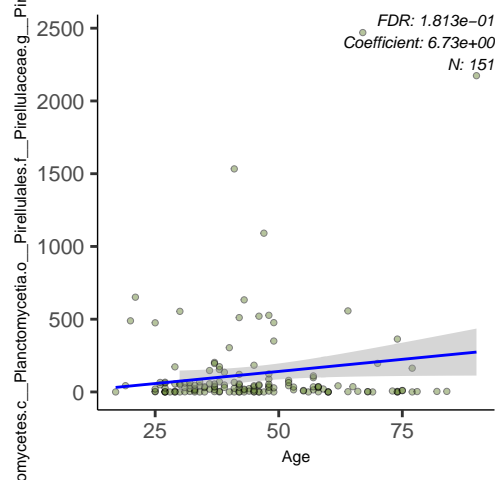

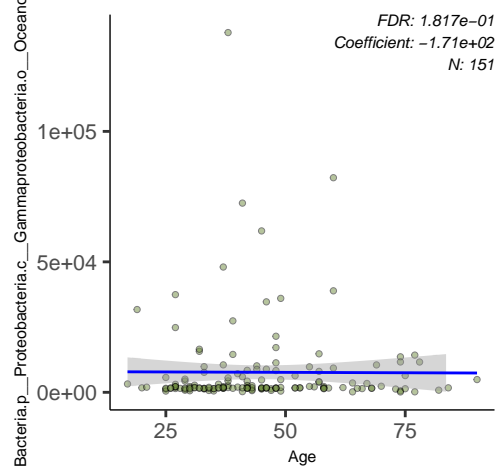



a.p.\_Firmicutes.c.\_Clostridia.o.\_Eubacteriales.f.\_Lachnospiraceae

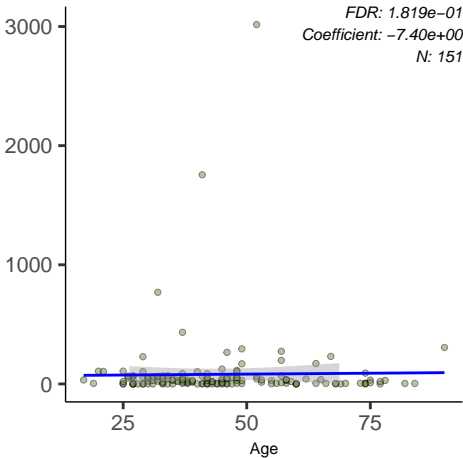

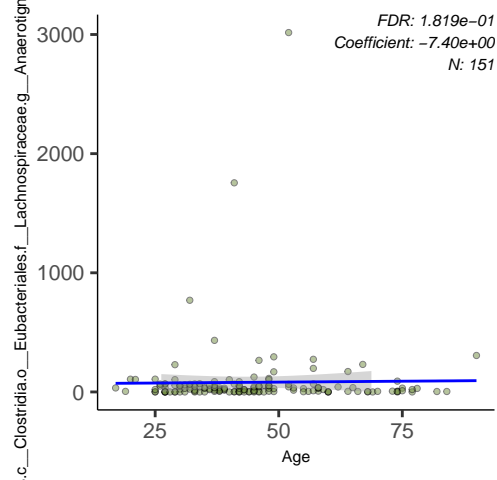

a.p\_\_Firmicutes.c\_\_Clostridia.o\_\_Eubacteriales.f\_\_Lachnospiraceae

*FDR: 1.829e-01*  
*Coefficient: 1.05e+01*  
*N: 151*

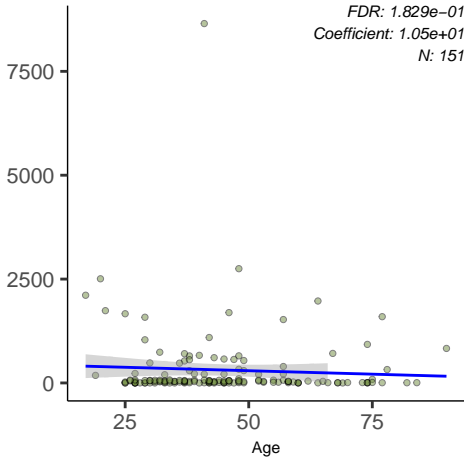

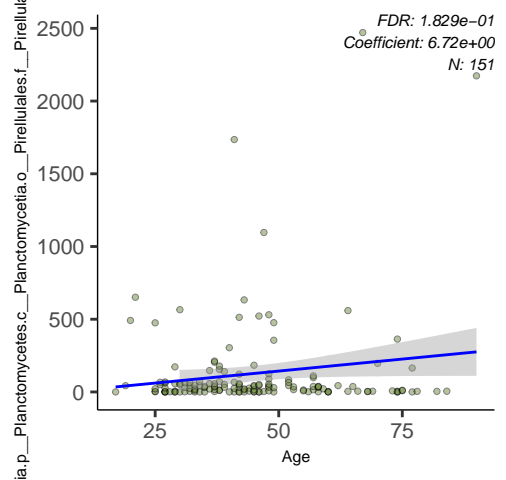

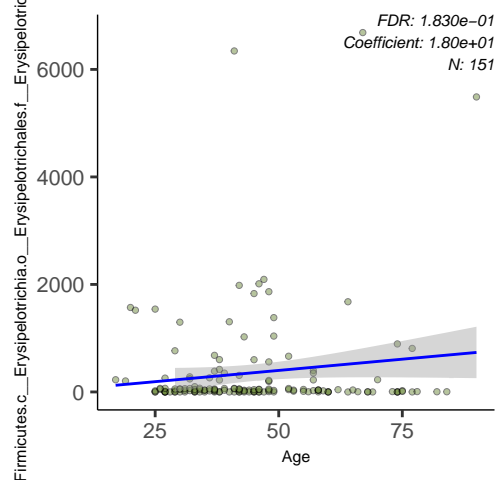

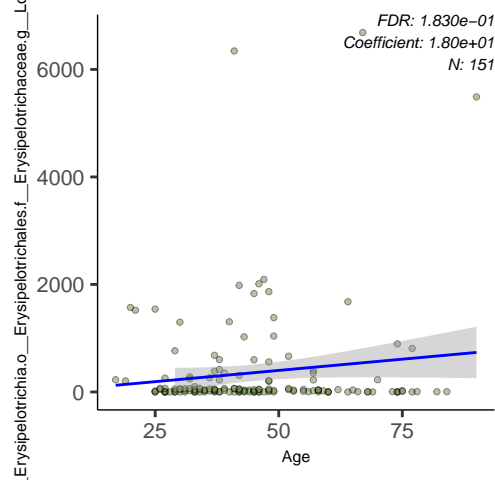

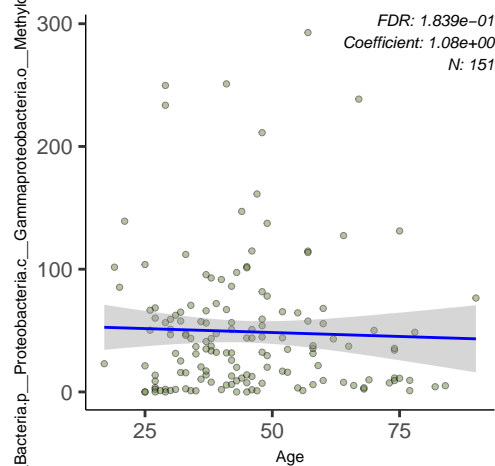

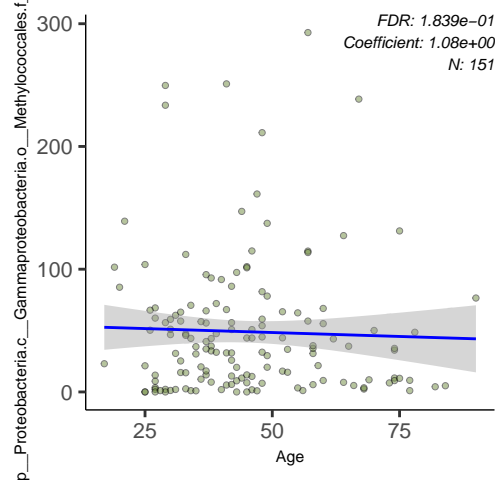



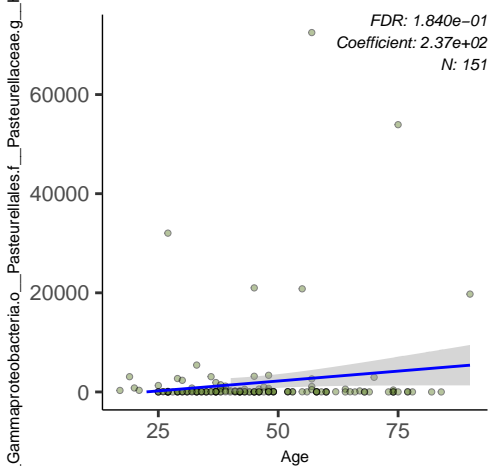

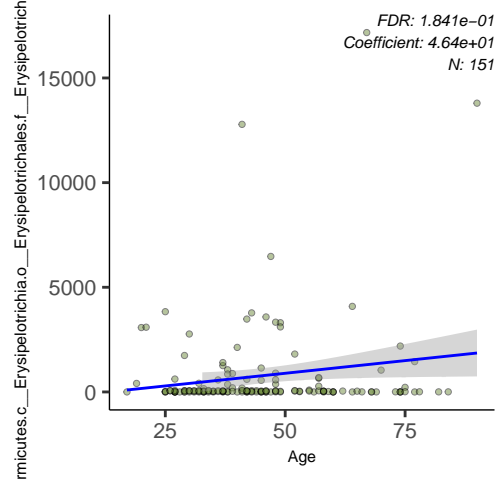

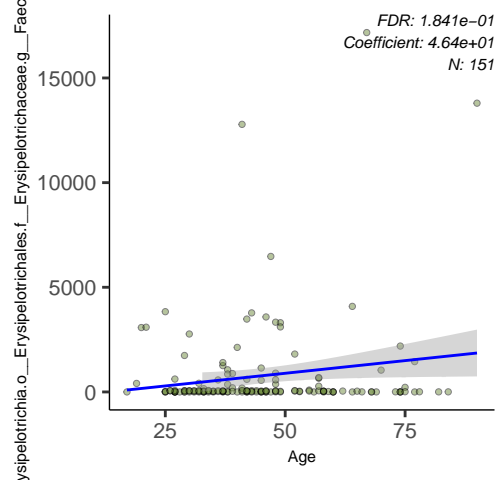

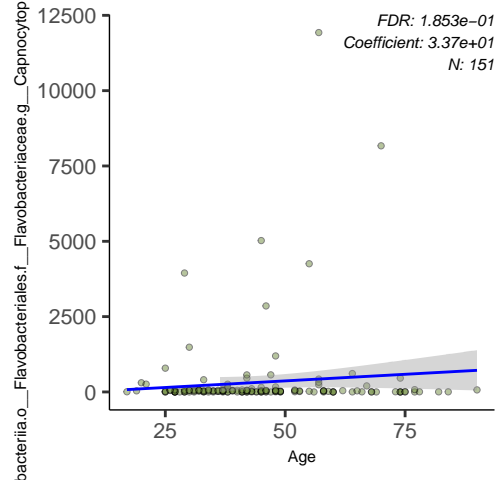

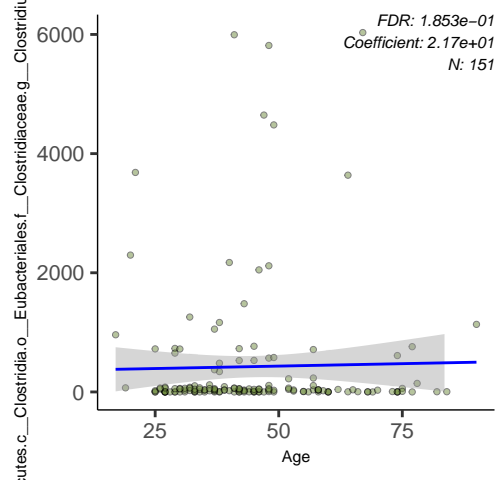

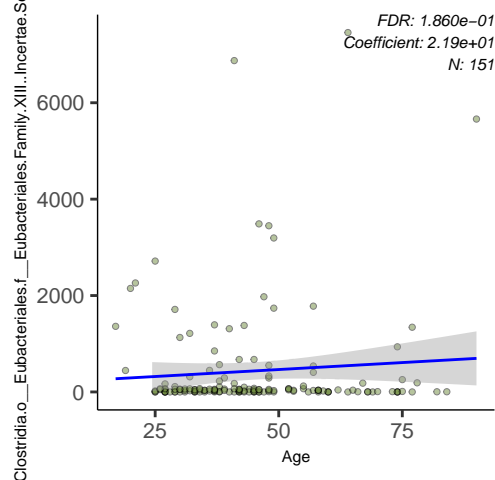

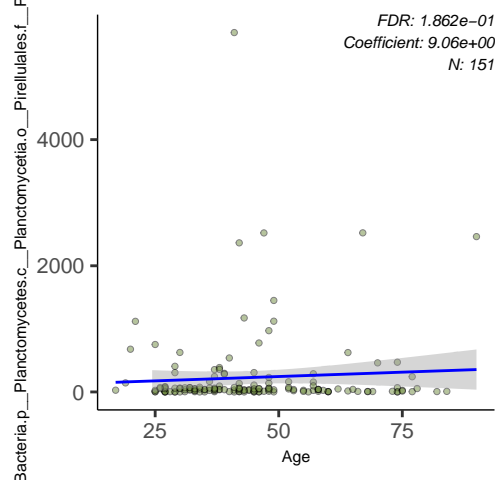

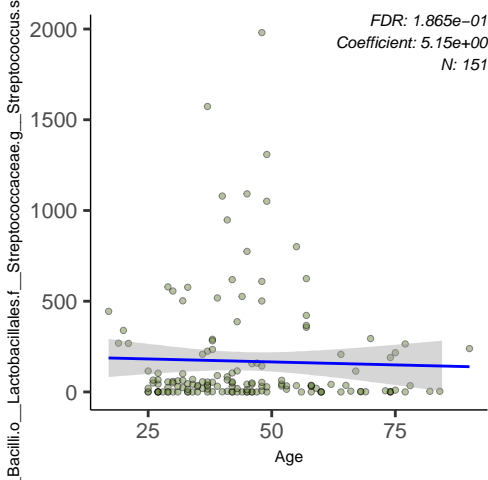



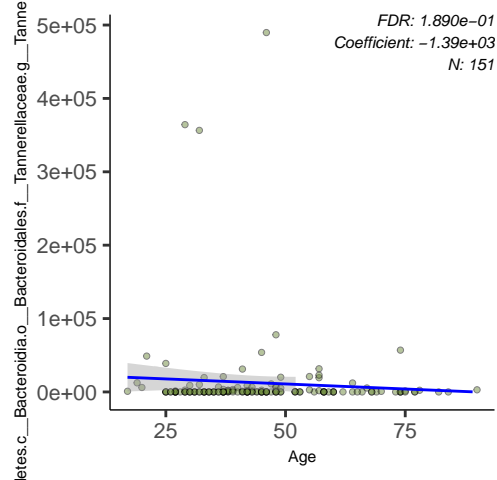

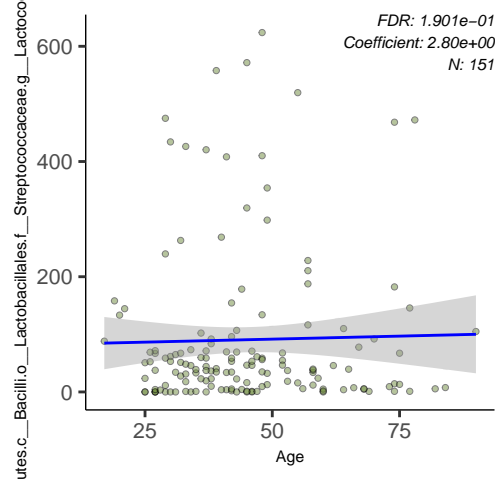

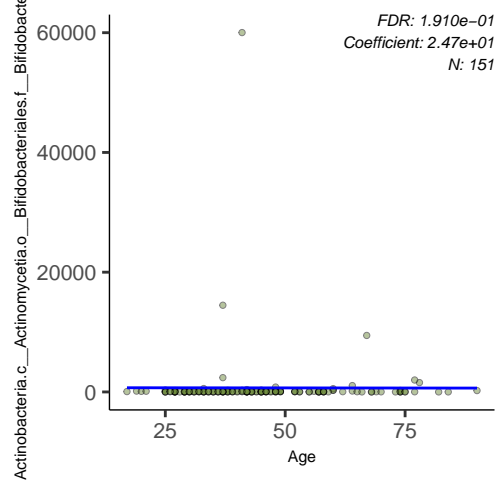

d\_\_Bacteria.p\_\_Armatimonadetes.c\_\_Fimbrimonadia

*FDR: 1.929e-01*  
*Coefficient: -1.61e+00*  
*N: 151*

400

200

0

25

50

75

Age

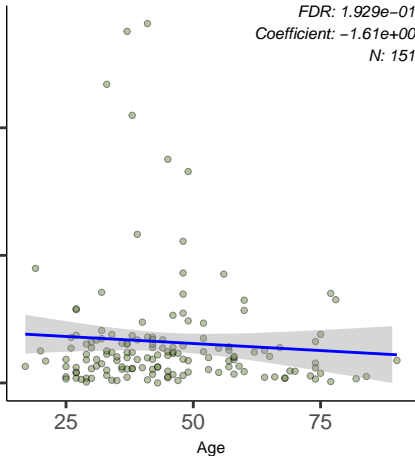

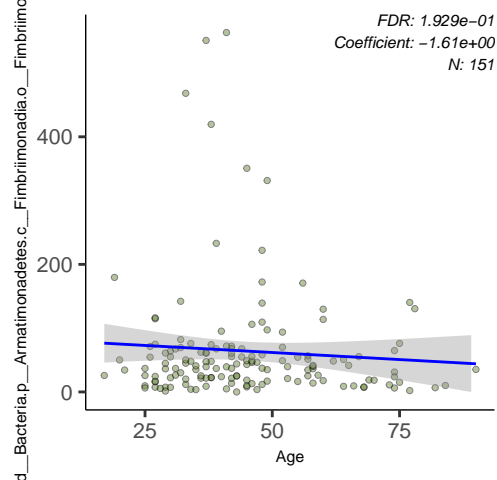

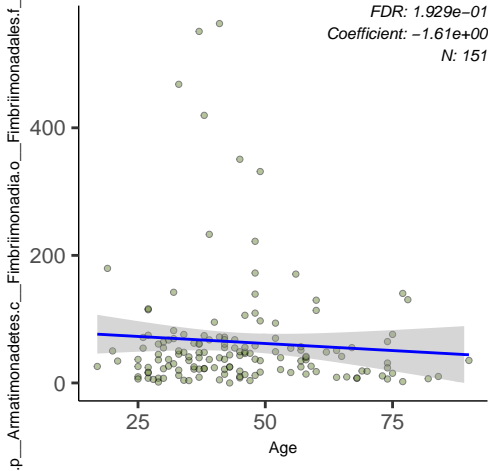

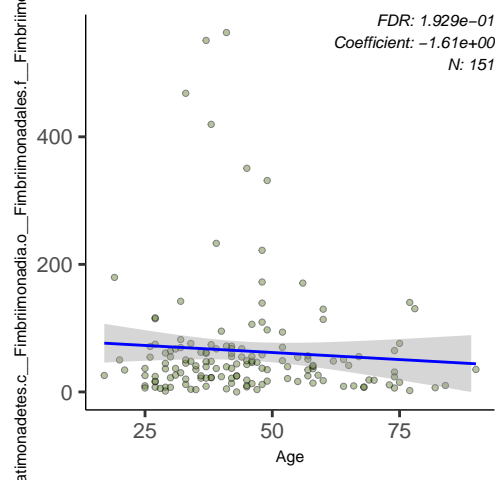

Fimbrimonadia.o\_Fimbrimonadales.f\_Fimbrimonadaceae.g

*FDR: 1.929e-01*  
*Coefficient: -1.61e+00*  
*N: 151*

400

200

0

25

50

75

Age

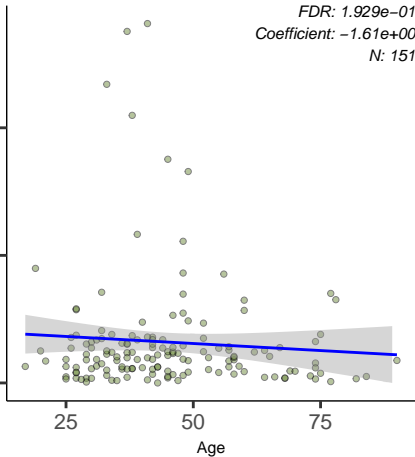



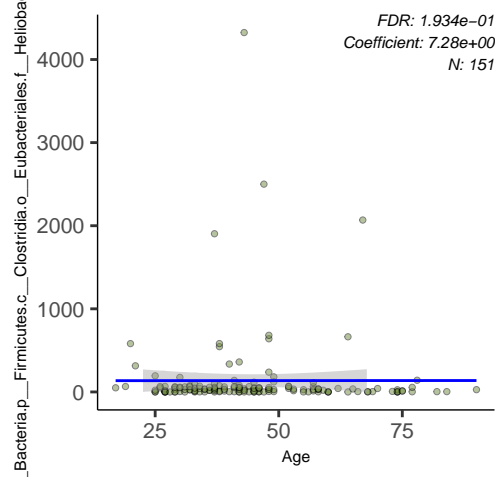

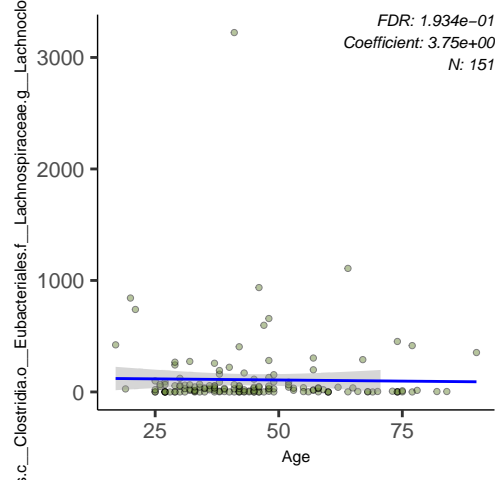

d\_Bacteria.p\_\_Chlamydiae

FDR: 1.945e-01  
Coefficient: 1.28e+02  
N: 151

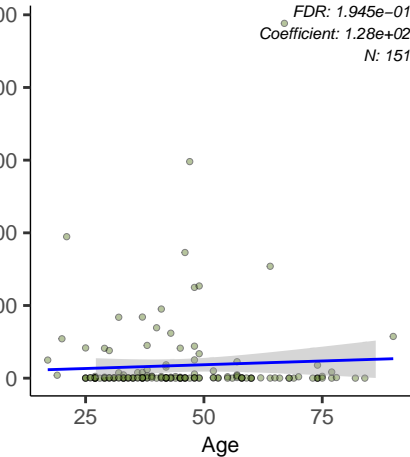

d\_Bacteria.p\_Chlamydiae.c\_Chlamydiia

FDR: 1.945e-01  
Coefficient: 1.28e+02  
N: 151

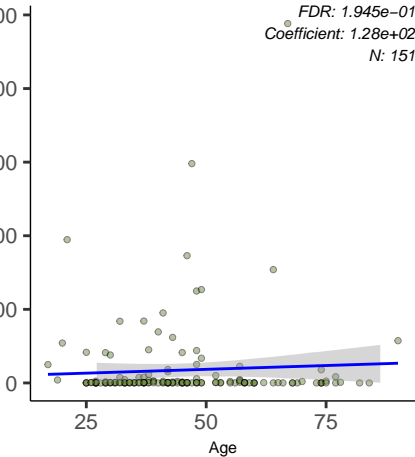

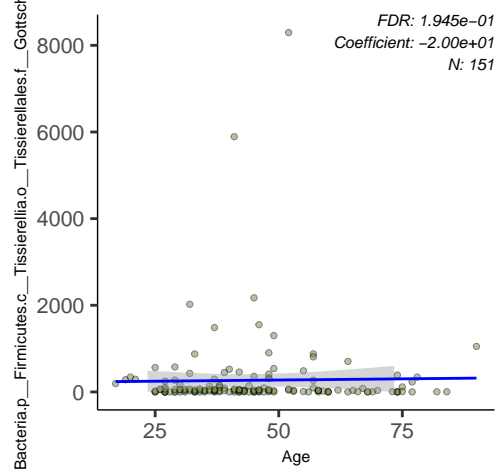

a.p\_Firmicutes.c\_Tissierellia.o\_Tissierellales.f\_Gottschalkiaceae

*FDR: 1.945e-01*  
*Coefficient: -2.00e+01*  
*N: 151*

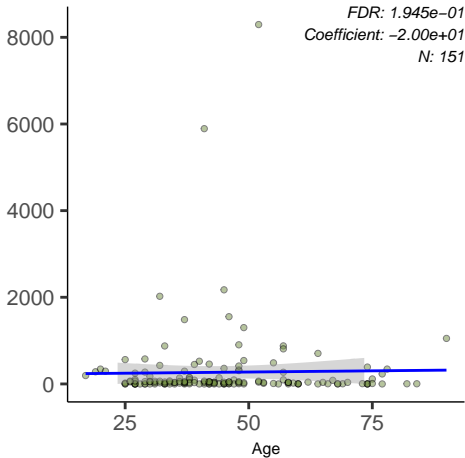

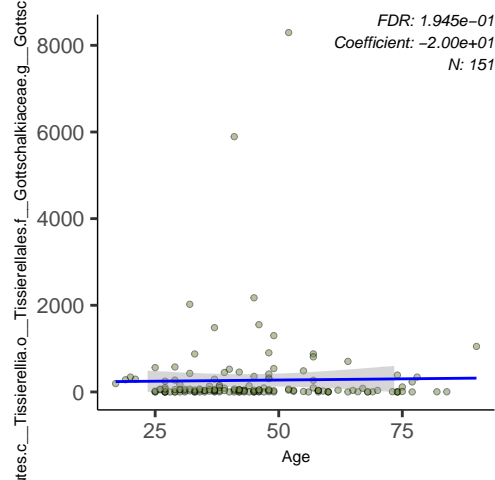

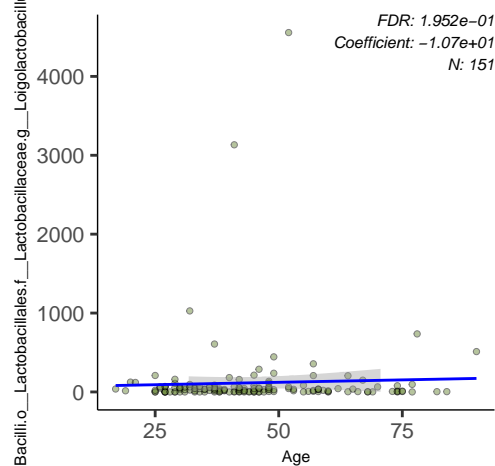



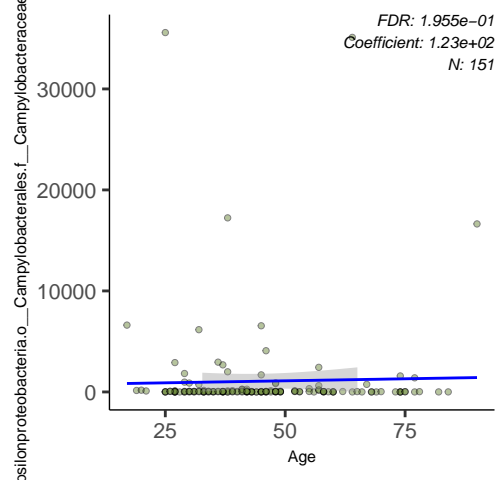

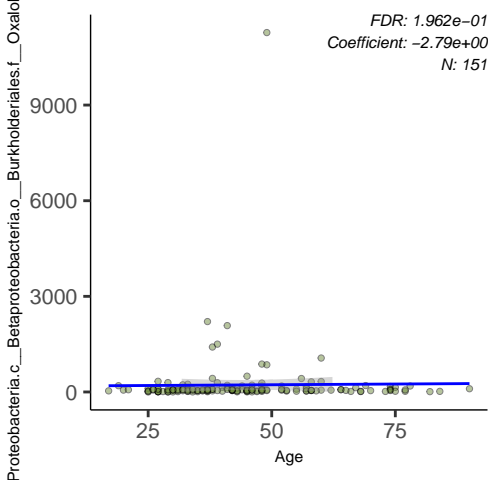

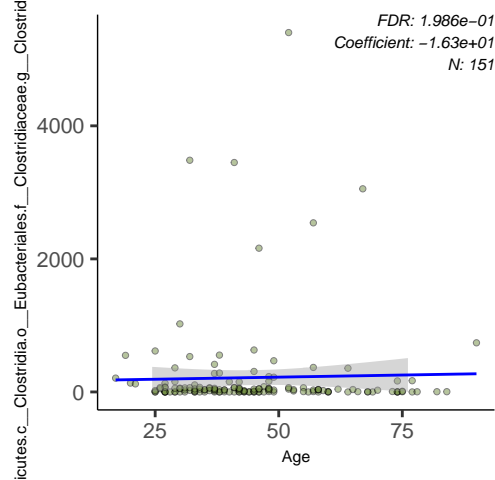

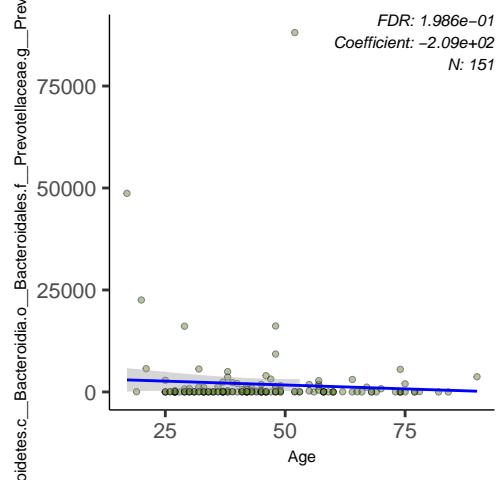

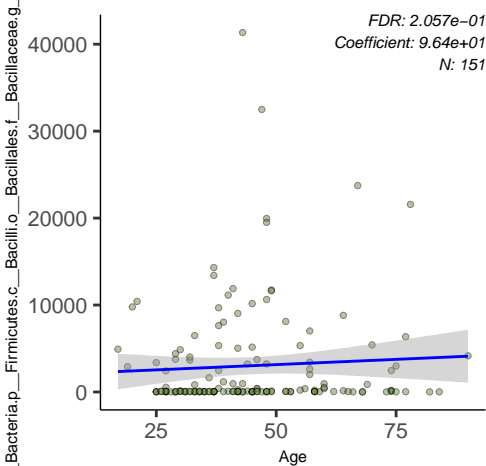

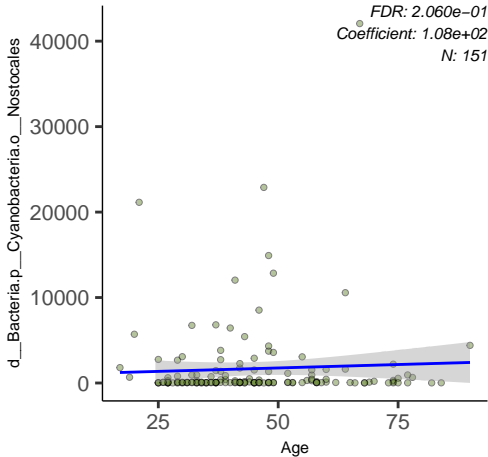

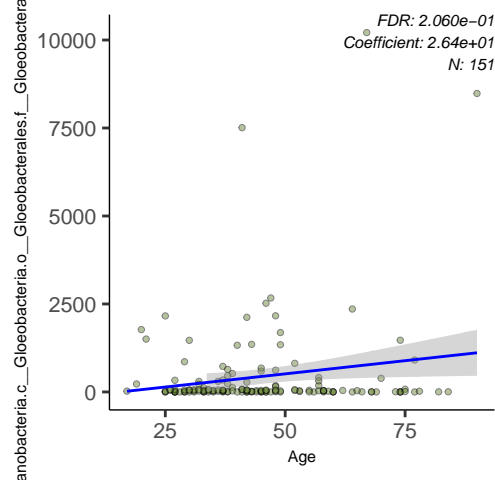

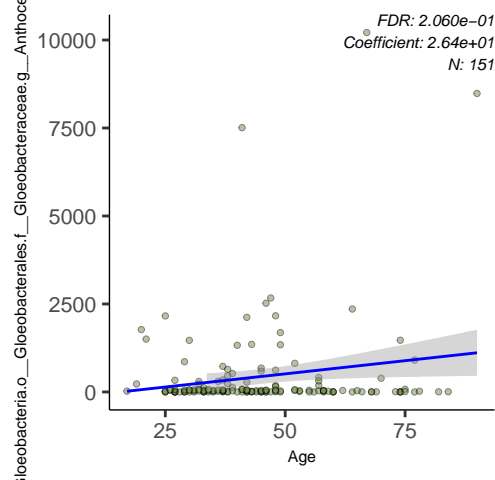



d\_\_Bacteria.p\_\_Cyanobacteria

FDR: 2.082e-01  
Coefficient: 1.49e+02  
N: 151

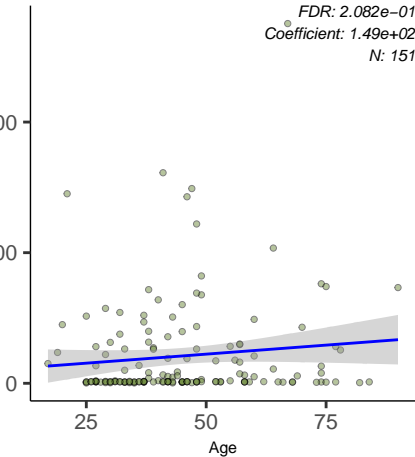

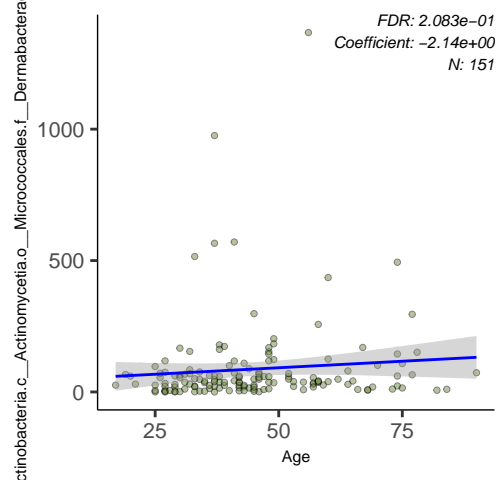

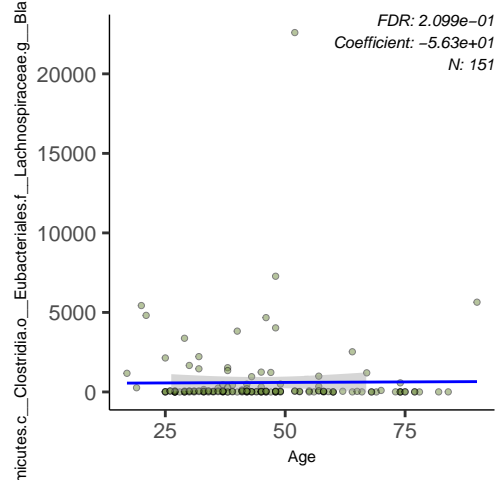

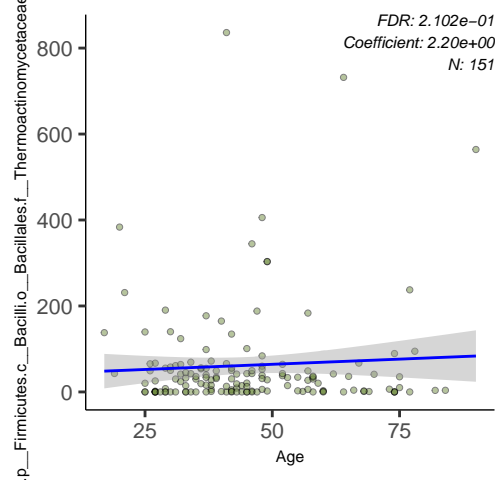

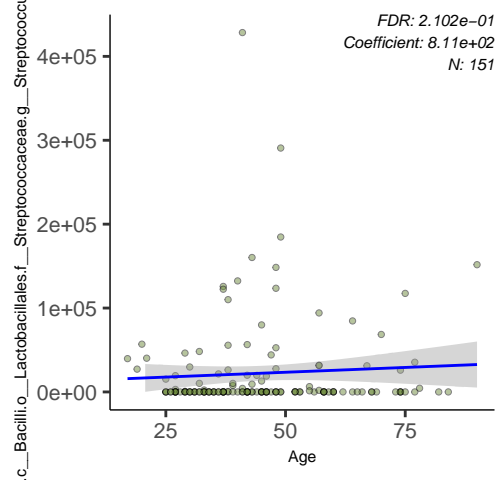

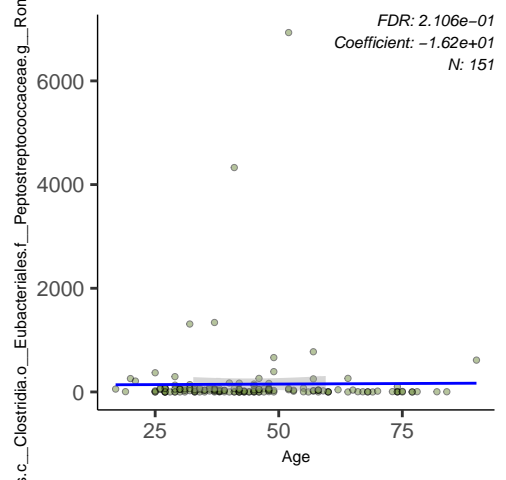

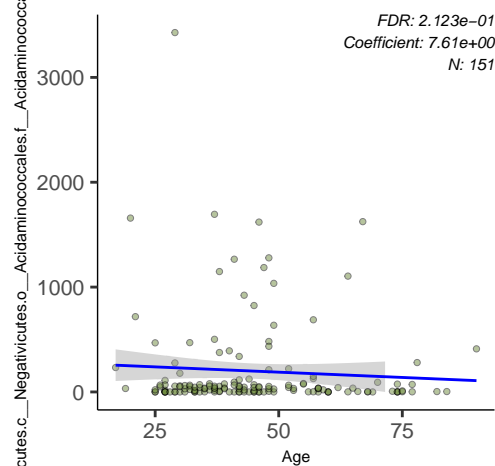

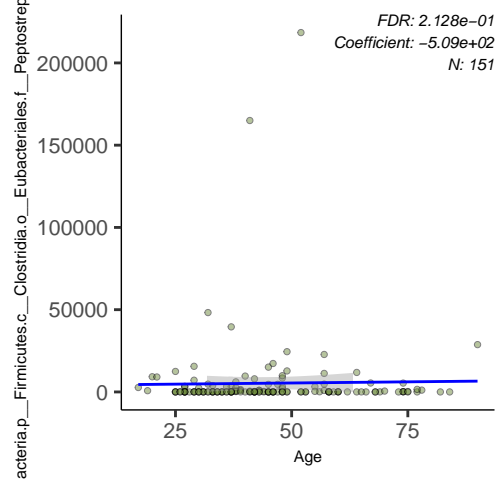



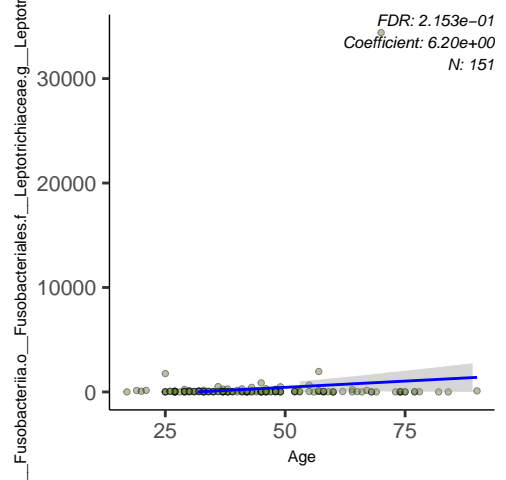

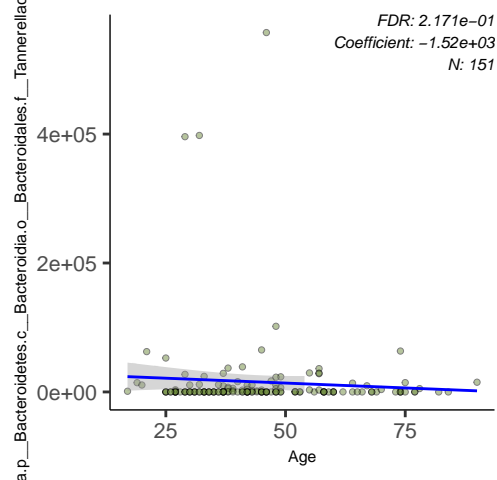

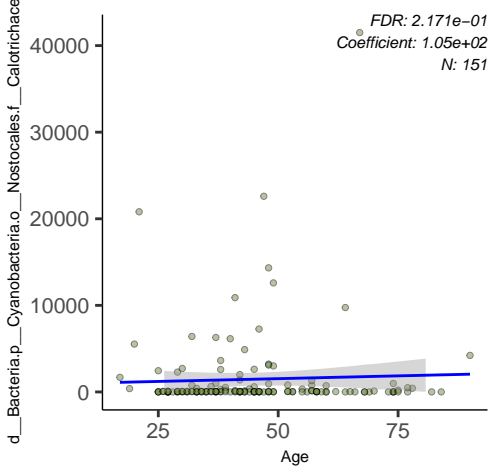

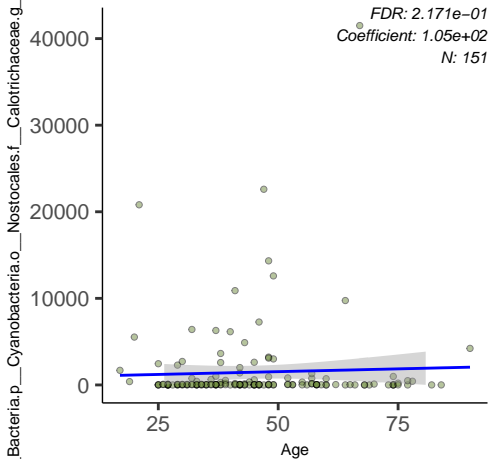

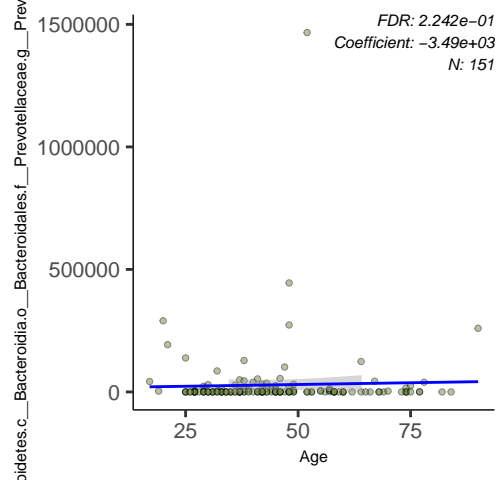

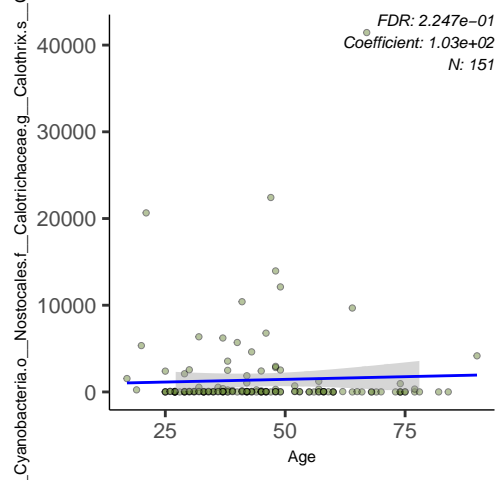

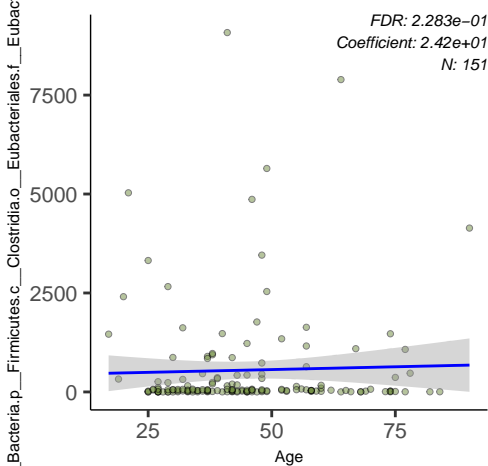

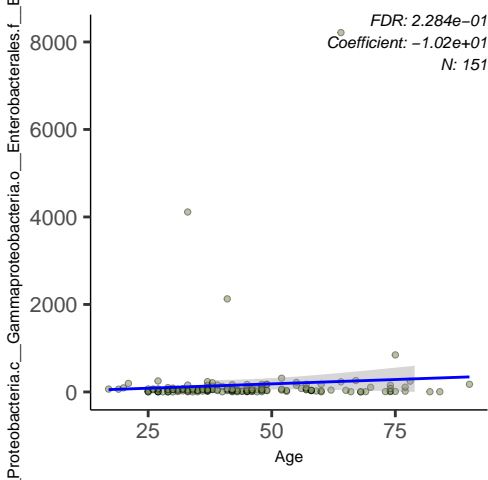



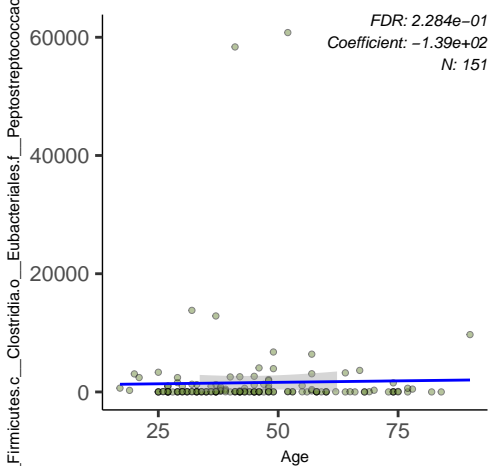

ia.p\_\_Firmicutes.c\_\_Clostridia.o\_\_Eubacteriales.f\_\_Heliobacteriace

*FDR: 2.286e-01*  
*Coefficient: 6.88e+00*  
*N: 151*

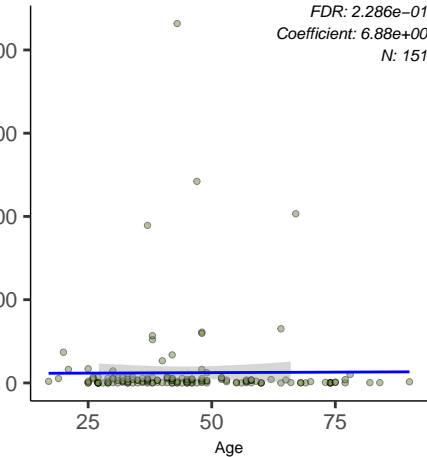

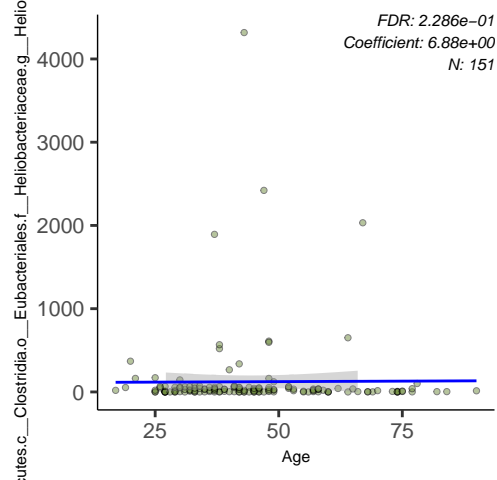

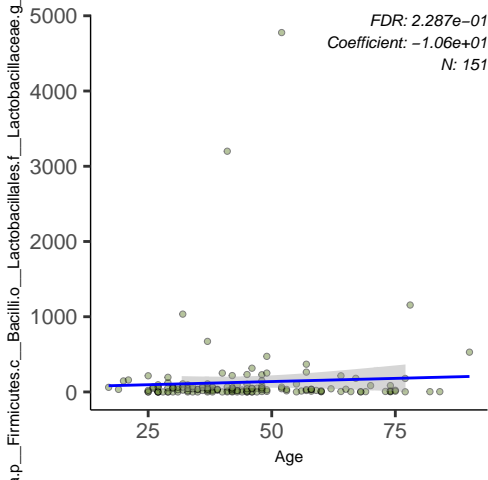

obacteria.c\_\_Alphaproteobacteria.o\_\_Caulobacteriales.f\_\_Caulobac

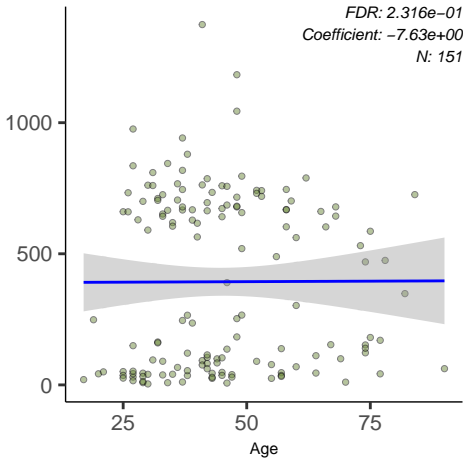

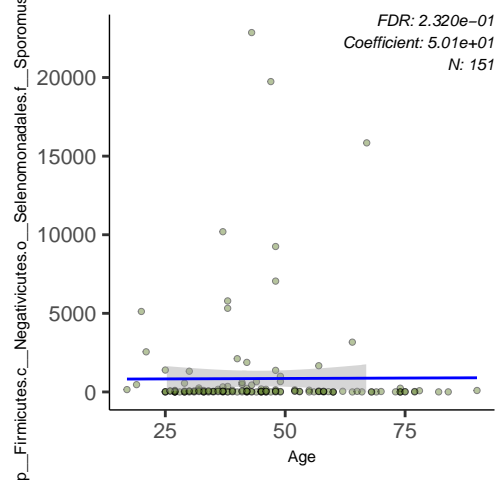

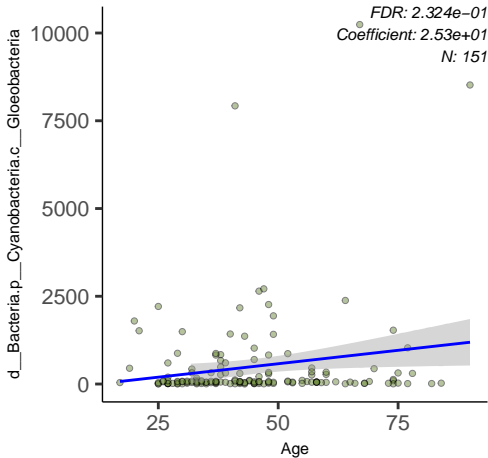

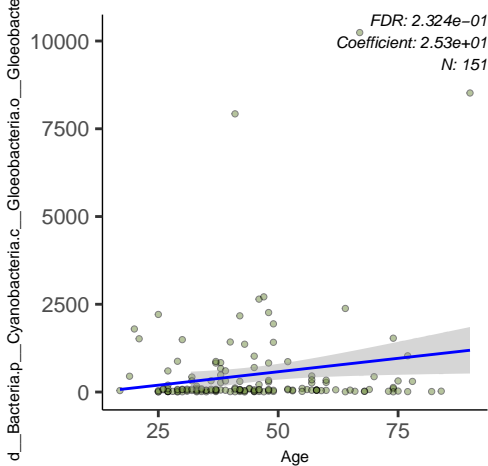



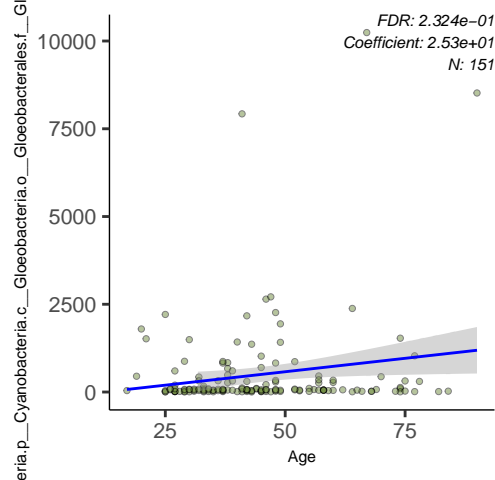

Clostridia.o\_\_Eubacteriales.f\_\_Eubacteriales.Family.XIII..Incertae.Se

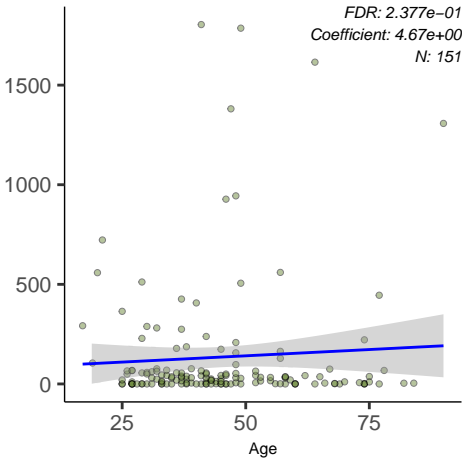

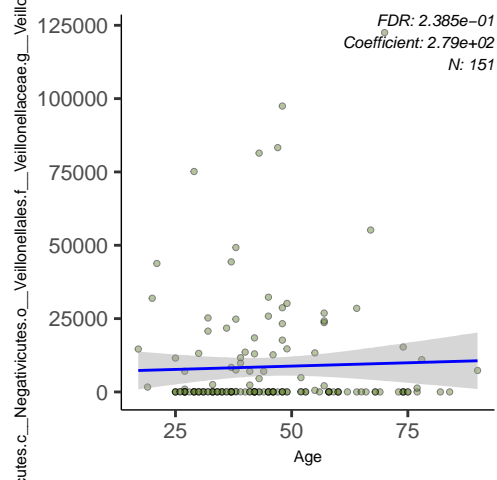

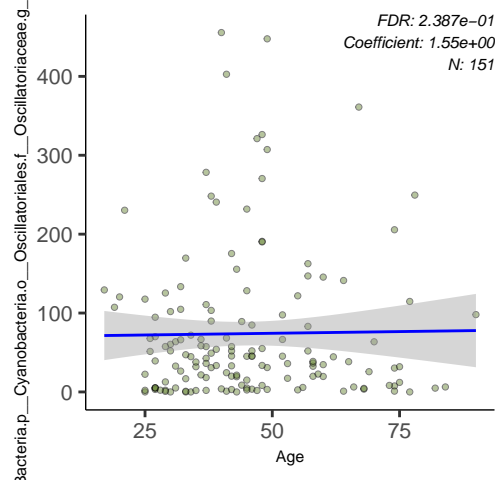

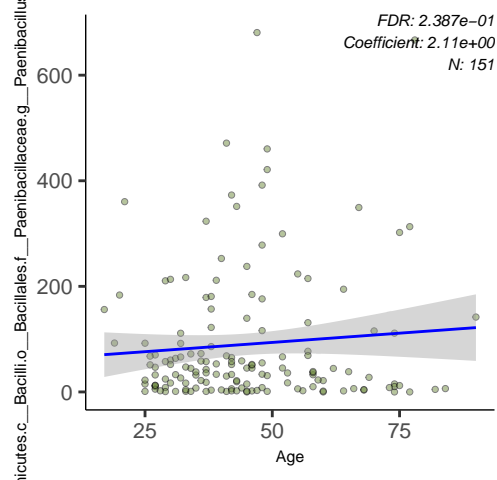

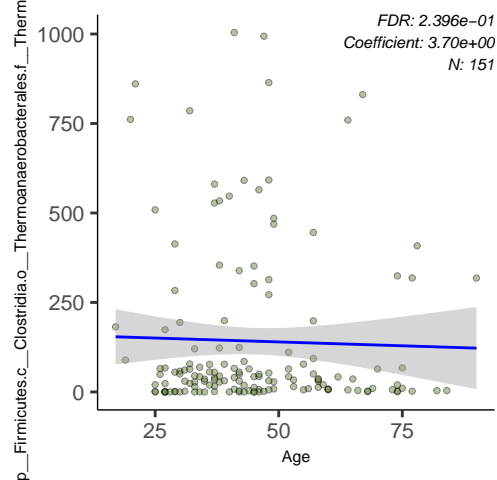

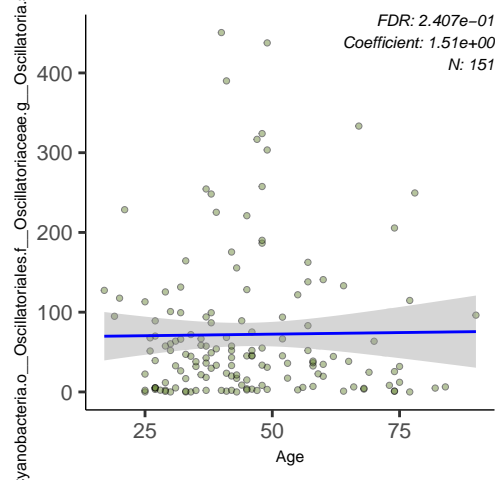

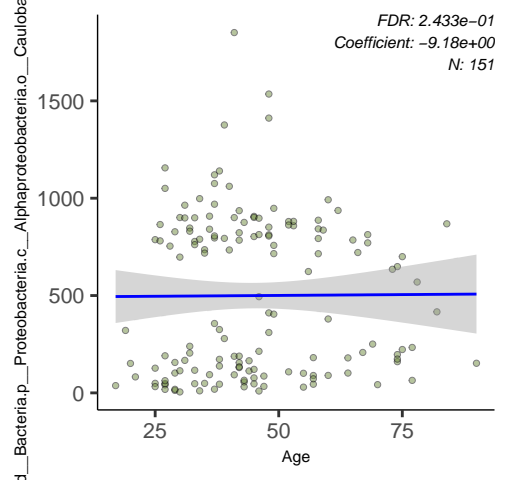



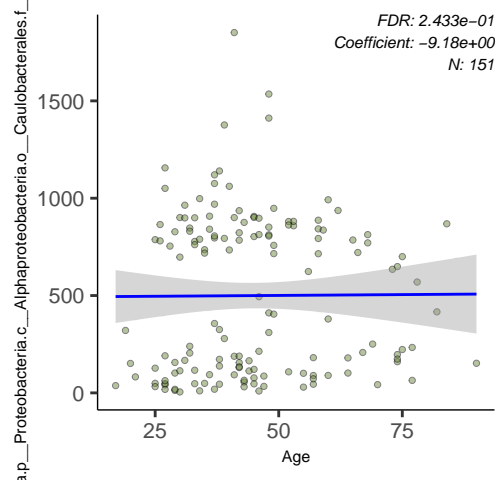

d\_Bacteria.p\_Acidobacteria.c\_Blastocatellia

*FDR: 2.436e-01*  
*Coefficient: 1.71e+00*  
*N: 151*

900  
600  
300  
0

25

50

75

Age

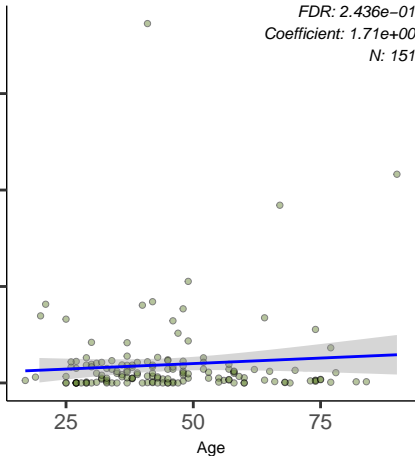

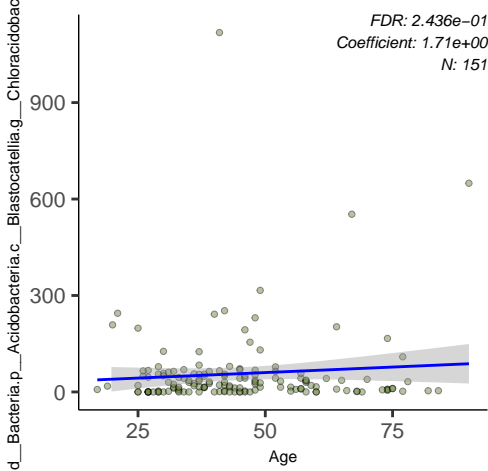

d\_Archaea.p\_\_Euryarchaeota

FDR: 2.449e-01  
Coefficient: -3.36e+00  
N: 151

1000

500

0

25

50

75

Age

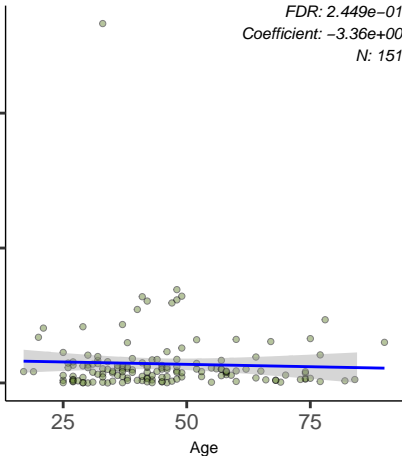

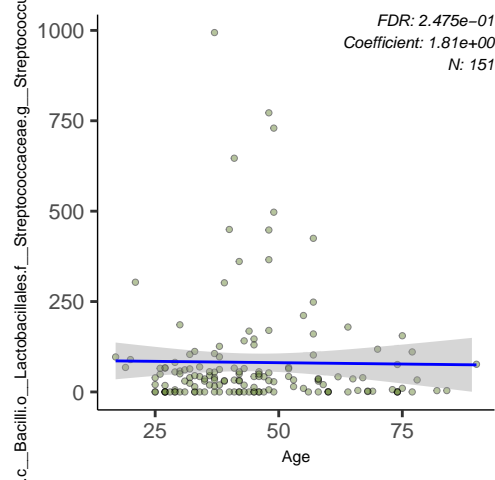

Supplement: s1 [file s1]
