# Supplementary material for: Metatranscriptome Analysis of Nasopharyngeal Swabs across the Varying Severity of COVID-19 Disease Demonstrated Unprecedented Species Diversity
Source: MDPI journal article supplement (doi:10.3390/microorganisms11071804), 2023-07-14

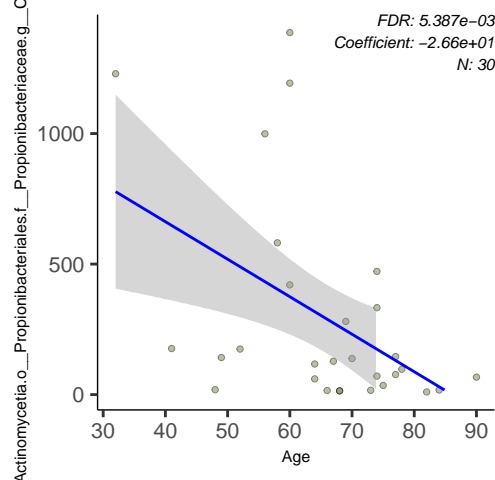

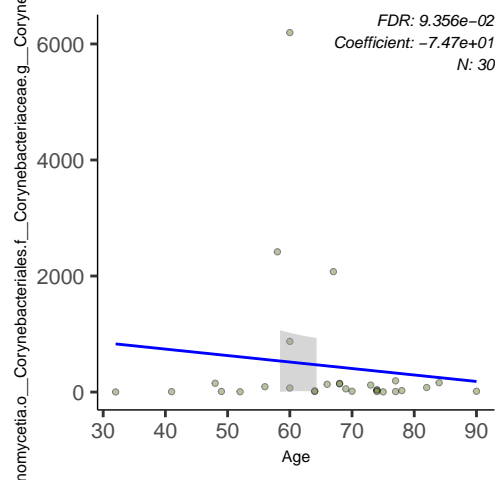

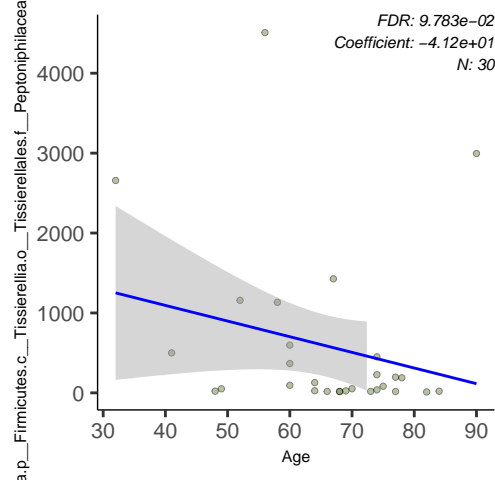

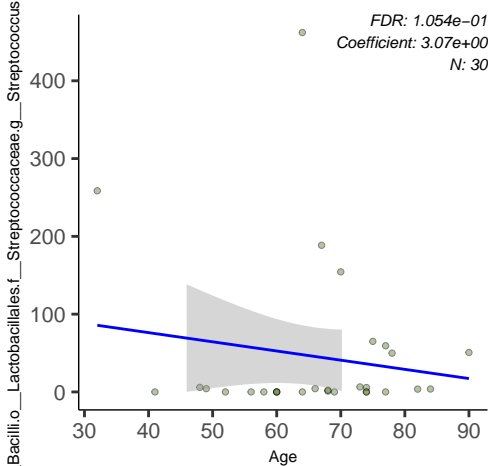

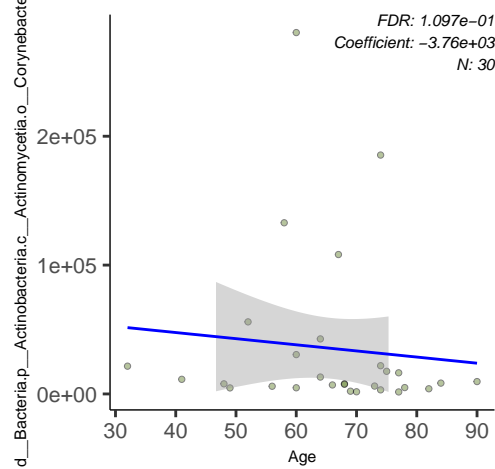

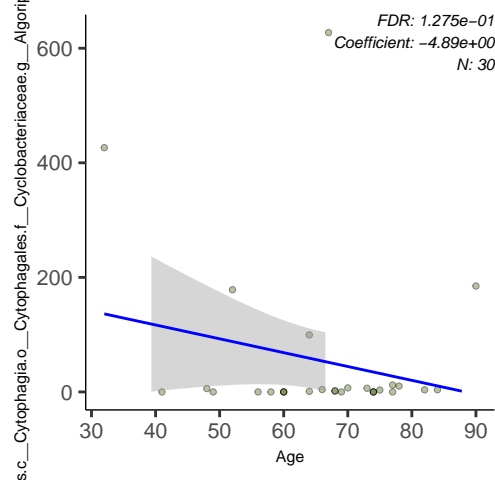

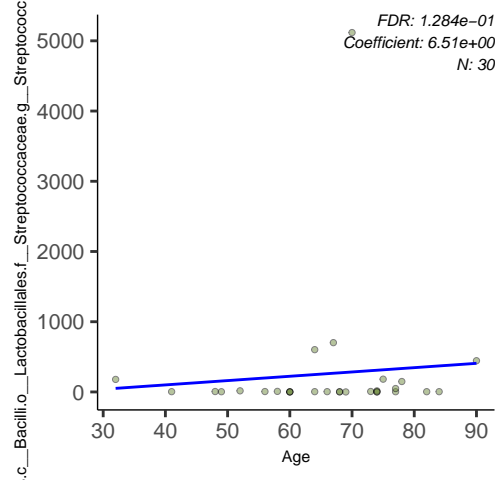

d\_Bacteria.p\_Deinococcus.Thermus

*FDR: 1.320e-01*  
*Coefficient: 2.52e+01*  
*N: 30*

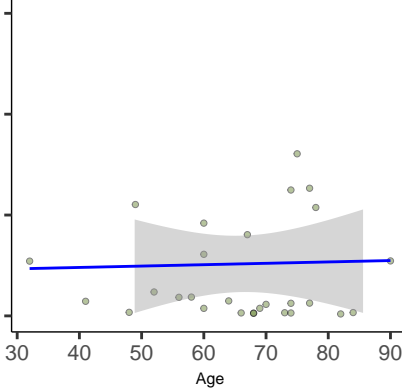



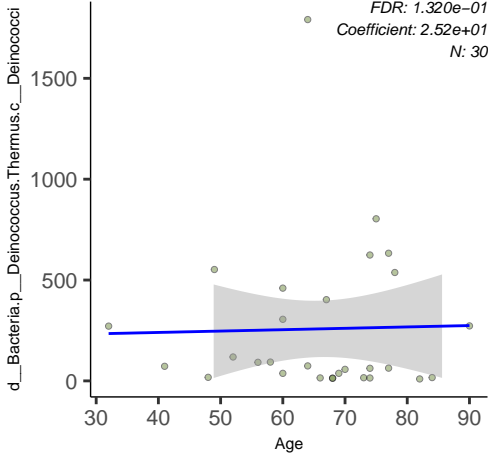

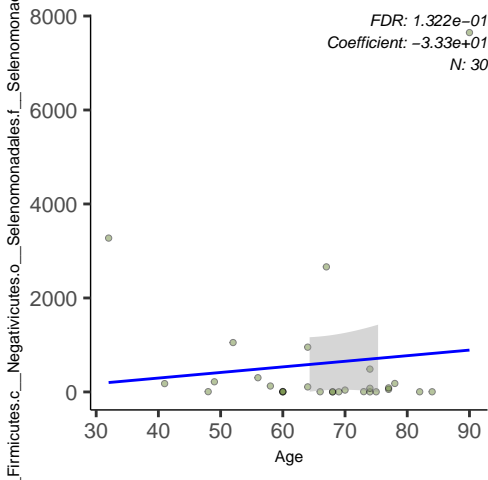

ia.p\_Actinobacteria.c\_Actinomycetia.o\_Corynebacteriales.f\_Co

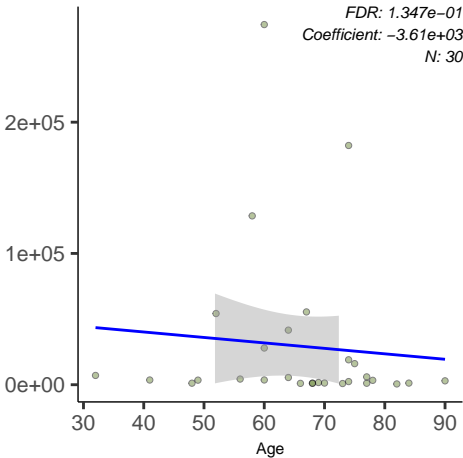

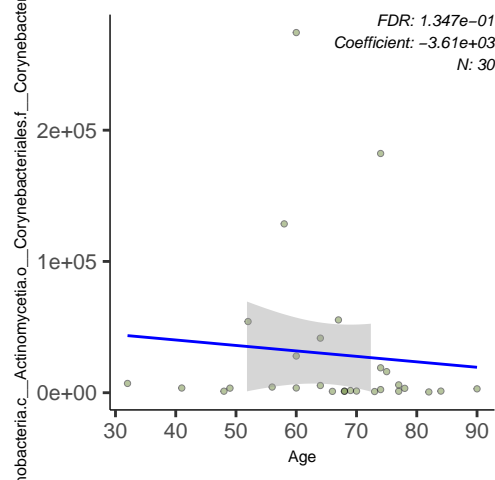

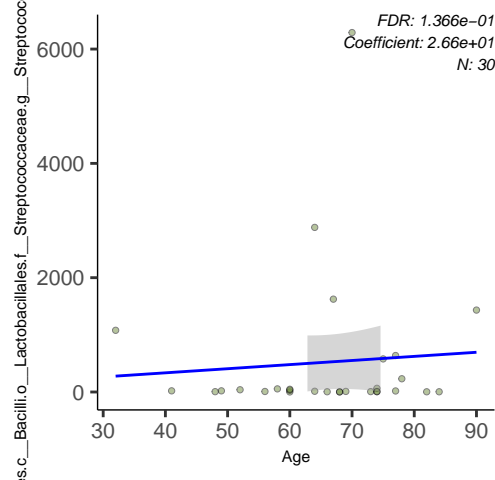

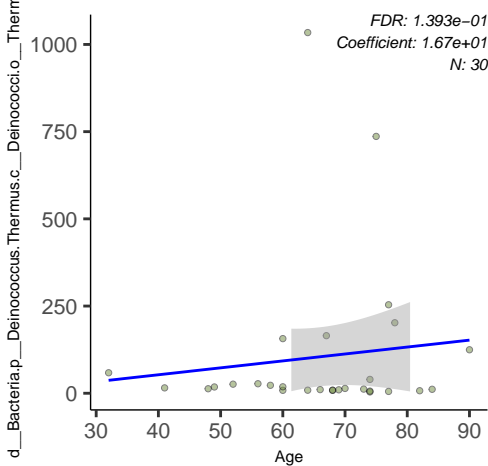

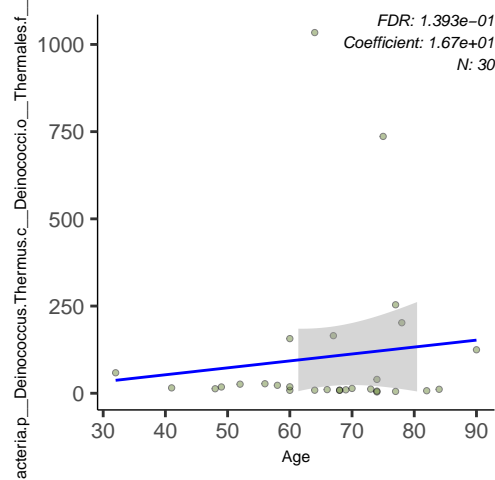

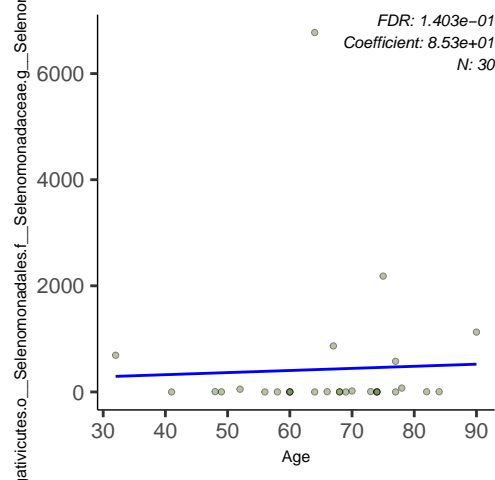



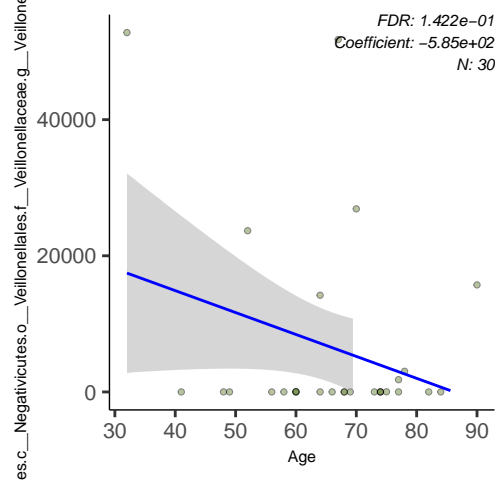

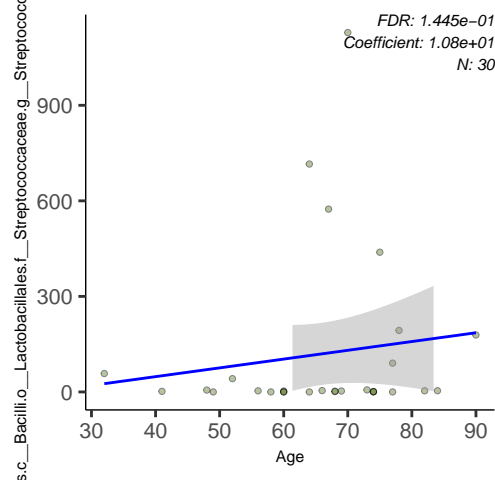

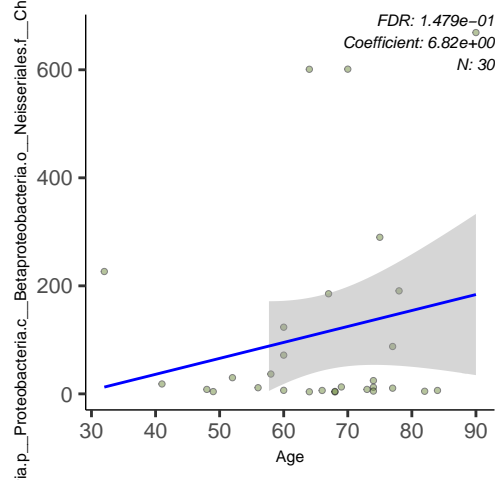

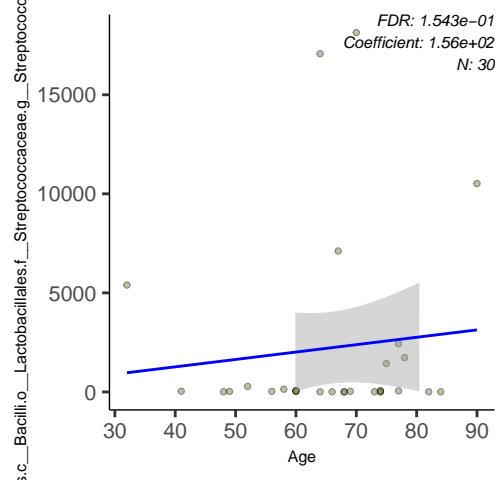

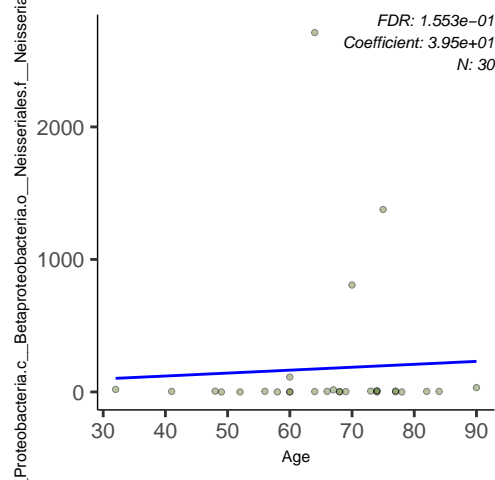

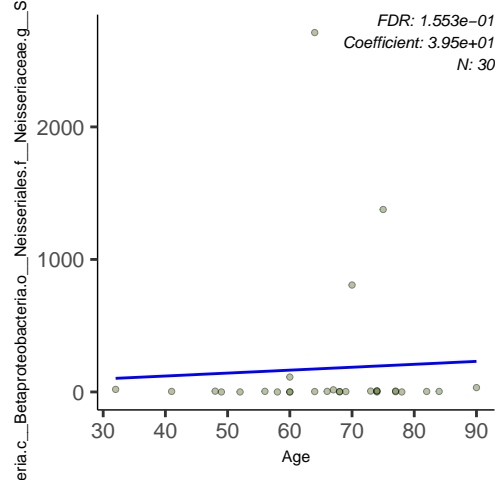

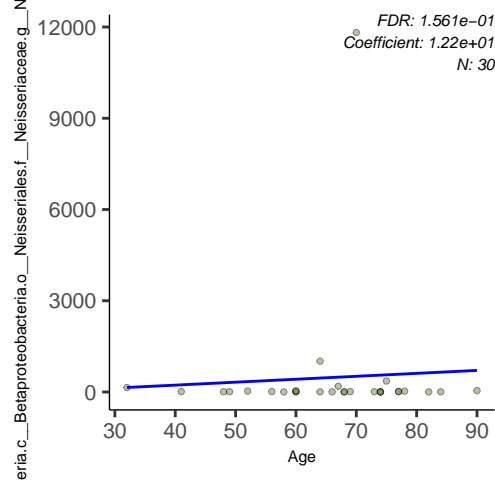

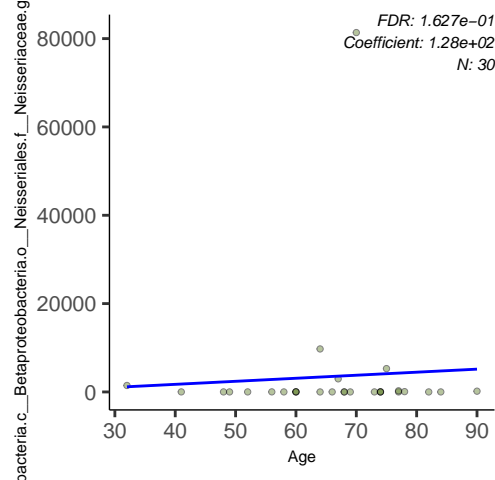



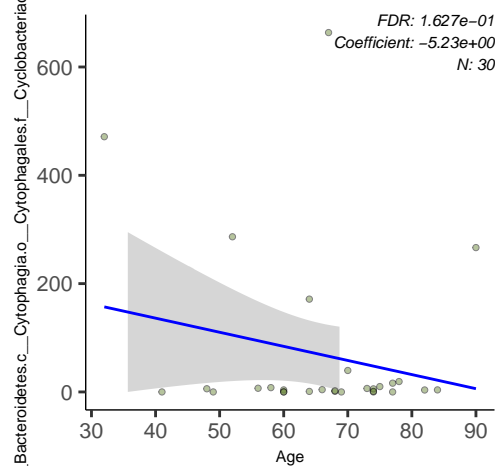

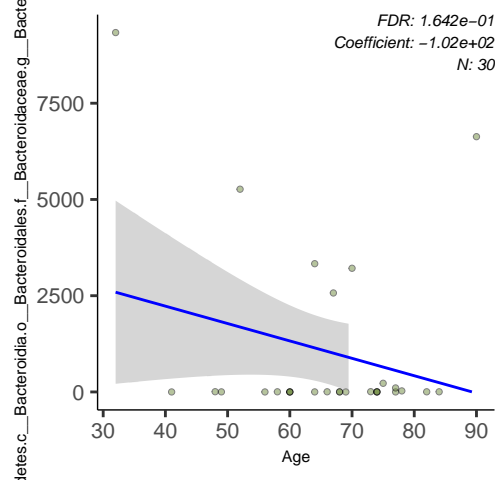

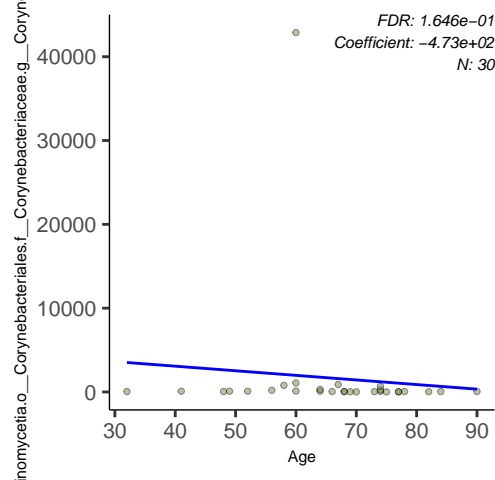

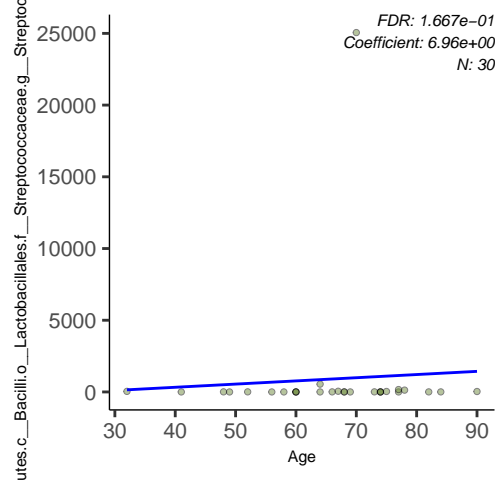

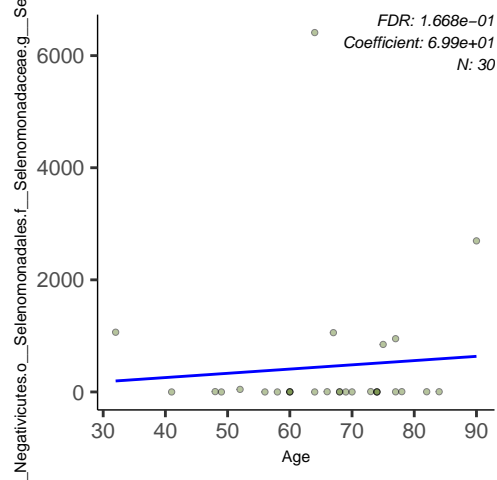

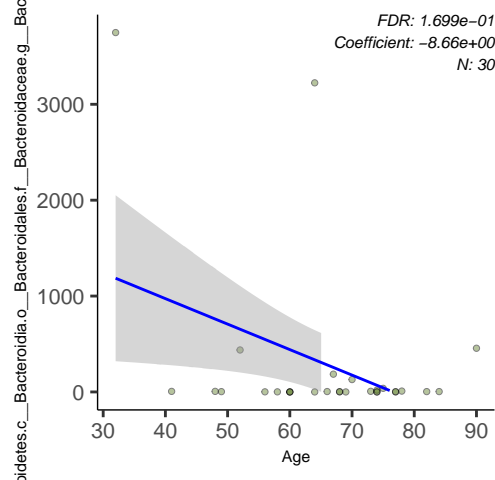

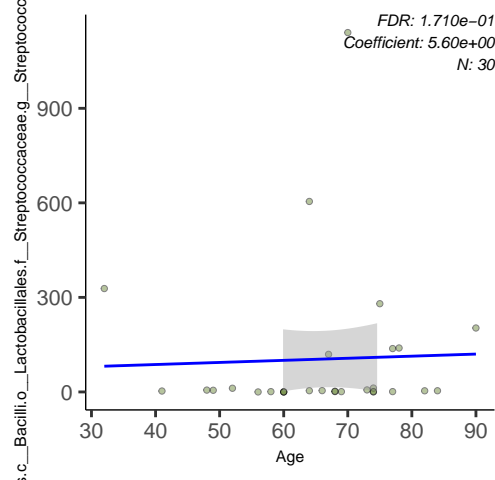

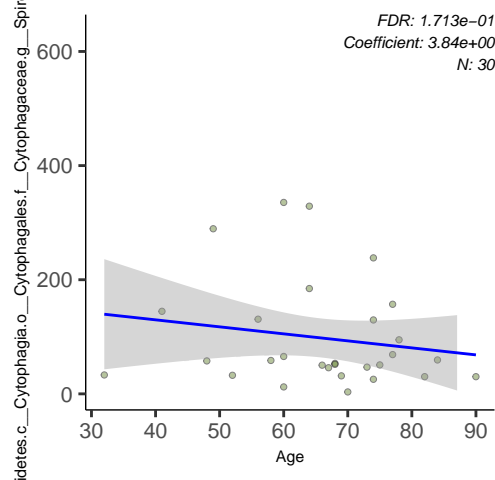



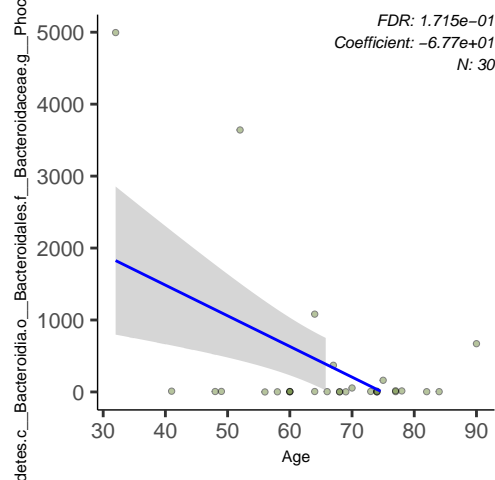

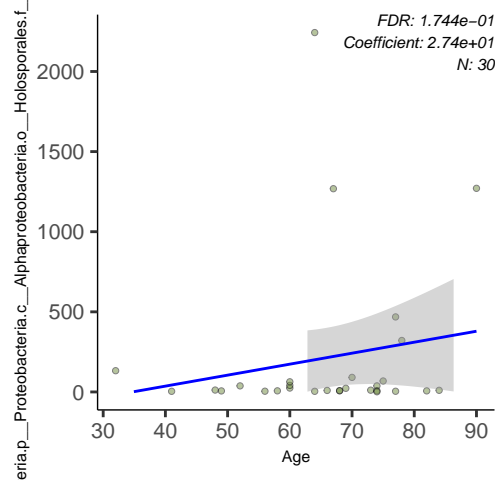

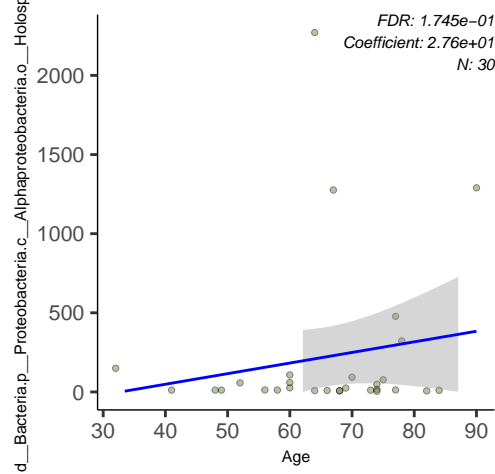

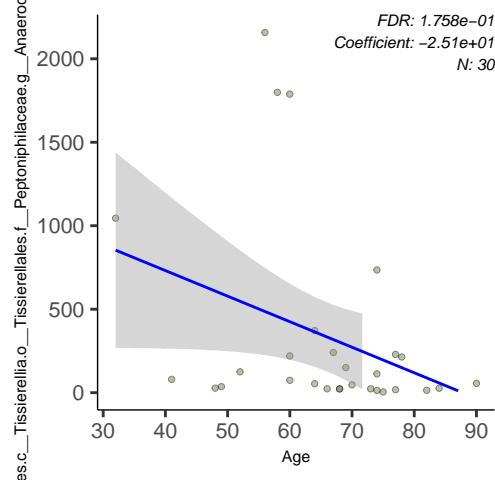

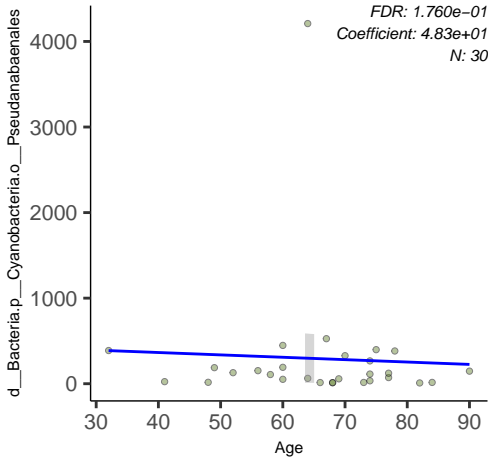

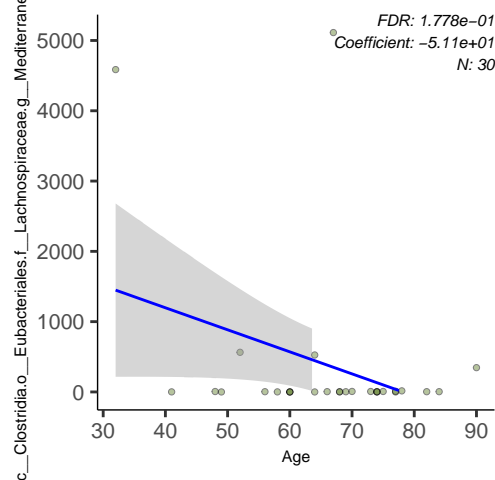

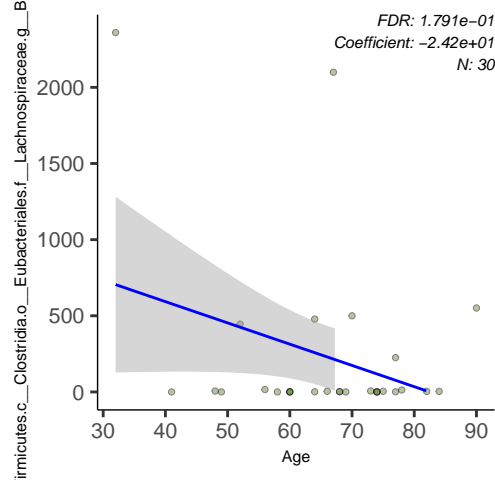

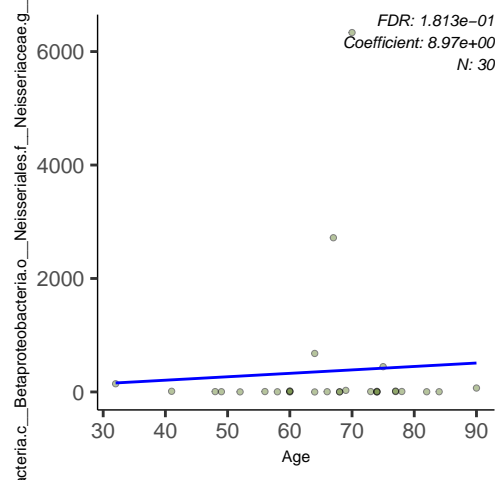



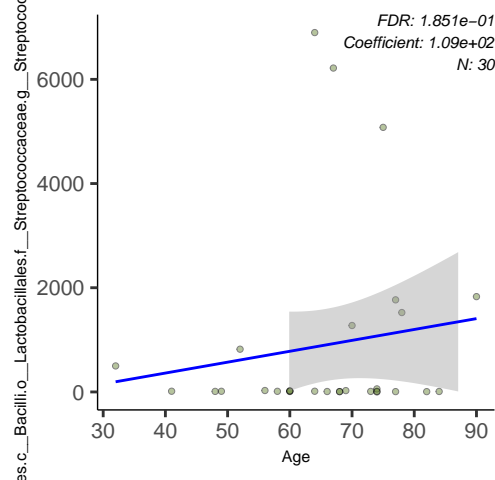

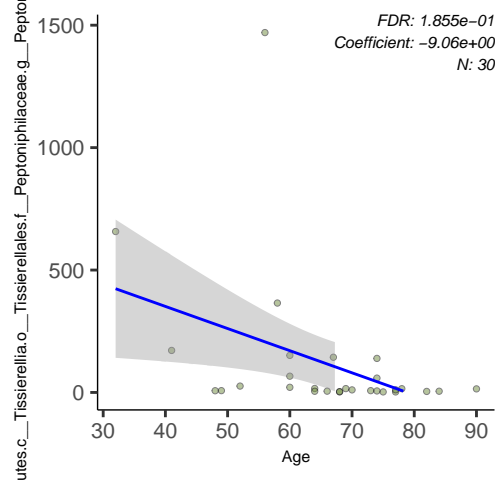

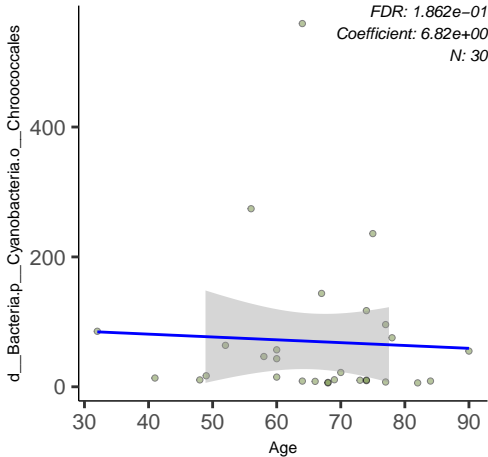

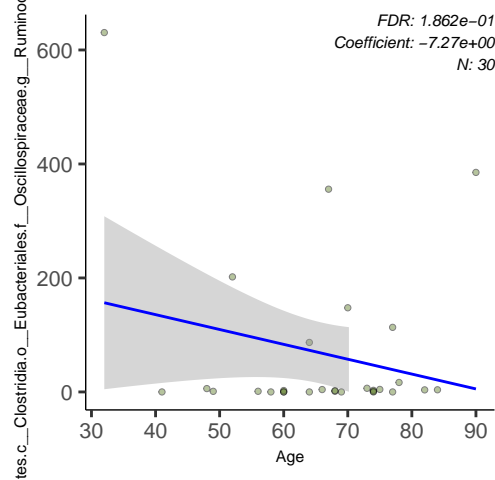

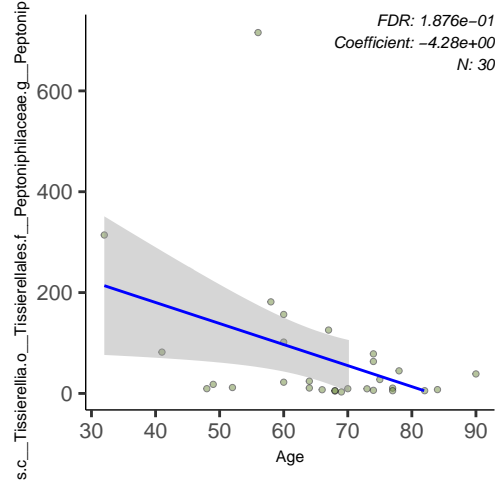

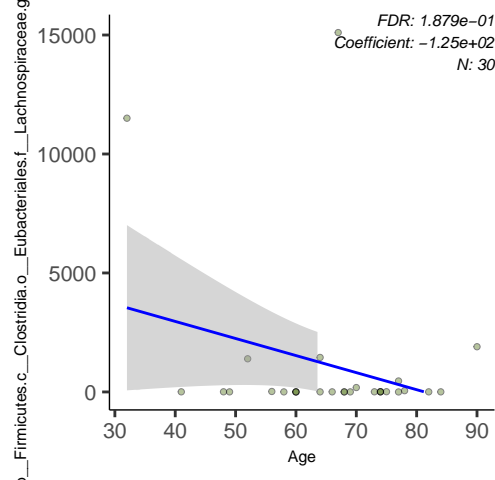

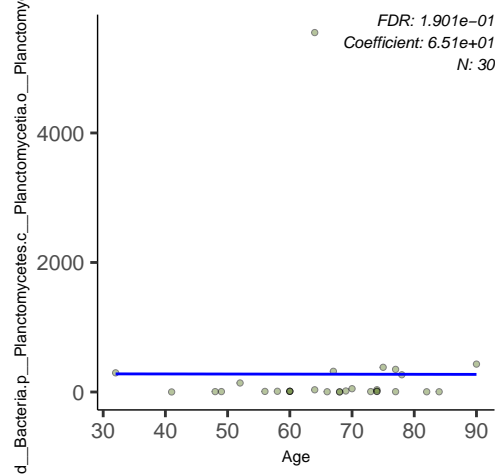

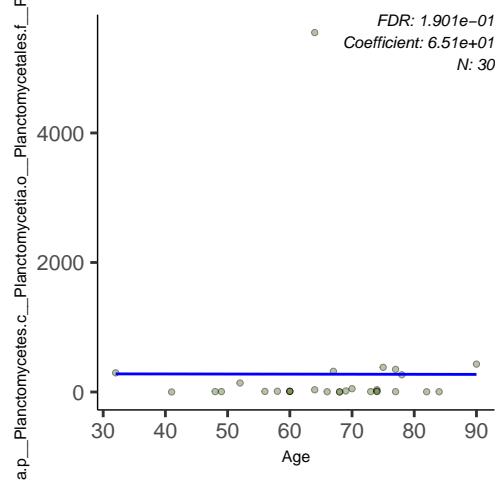



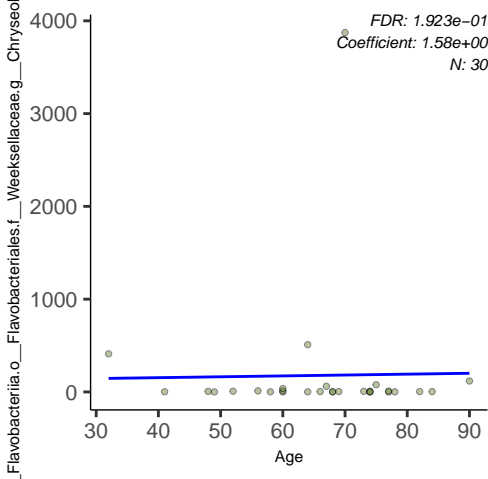

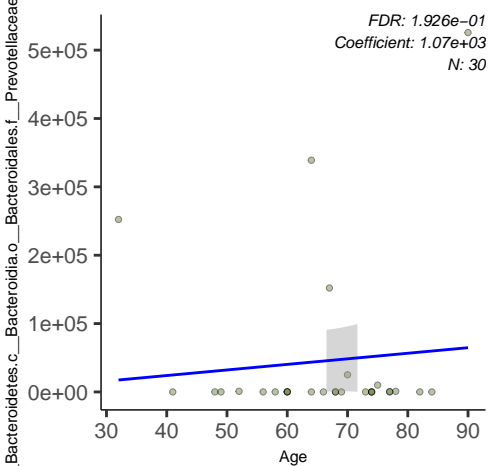

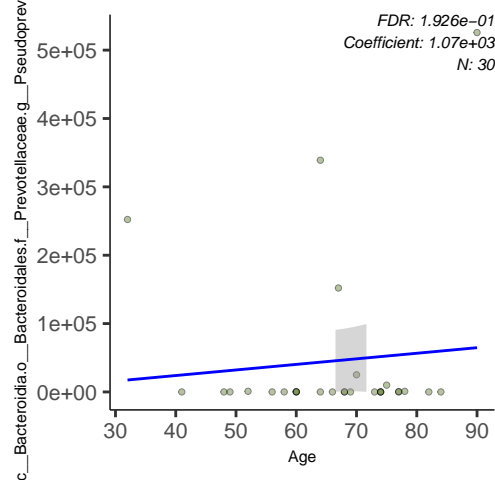

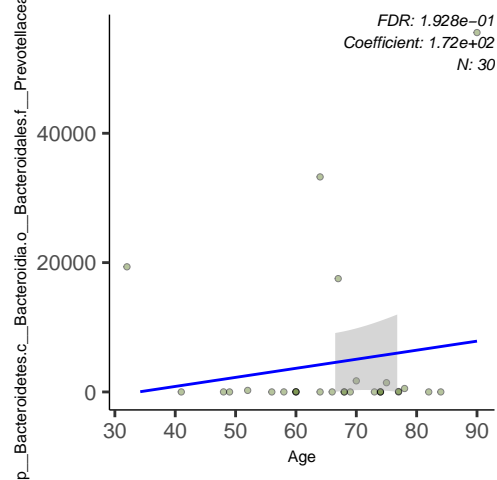

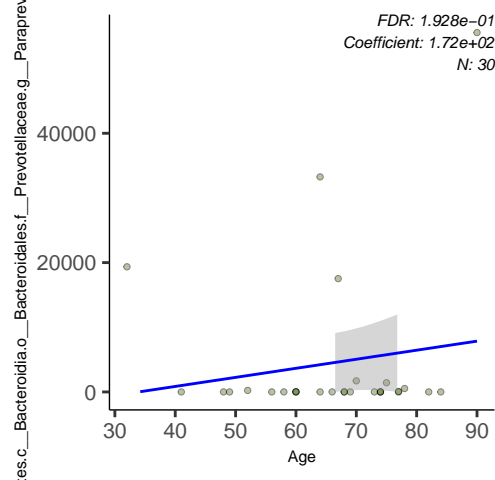

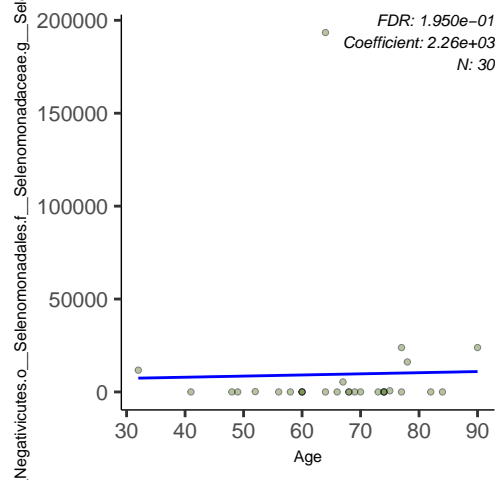

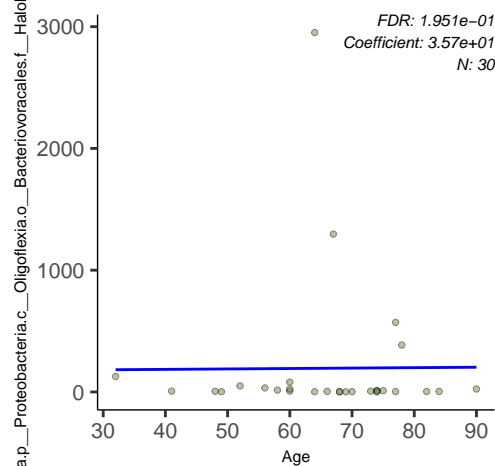

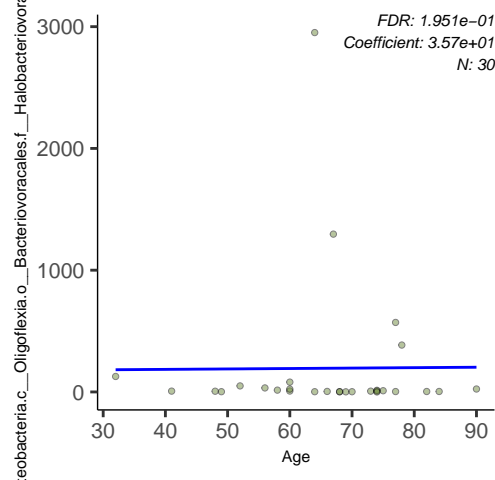



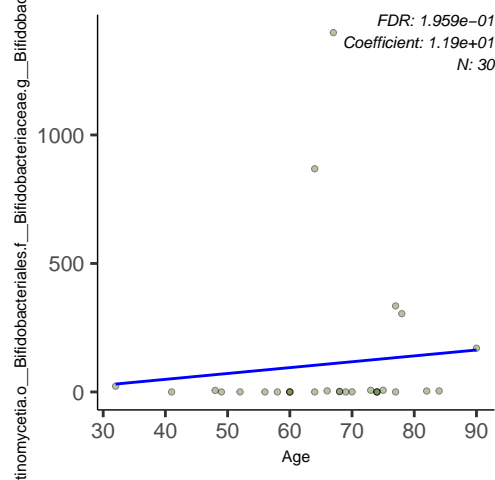

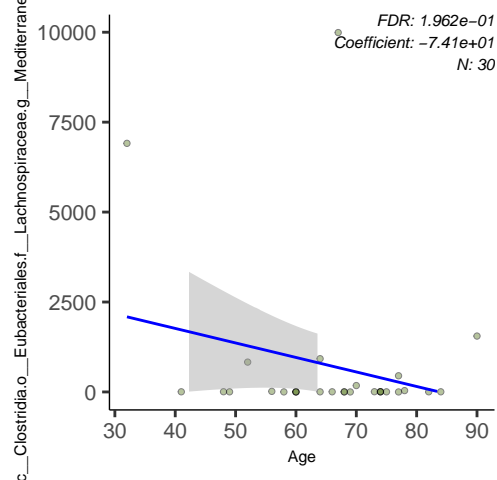

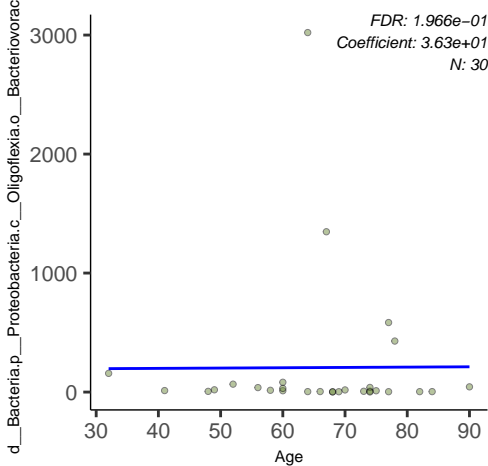

acteroidetes.c\_\_Flavobacteriia.o\_\_Flavobacteriales.f\_\_Flavobacteri

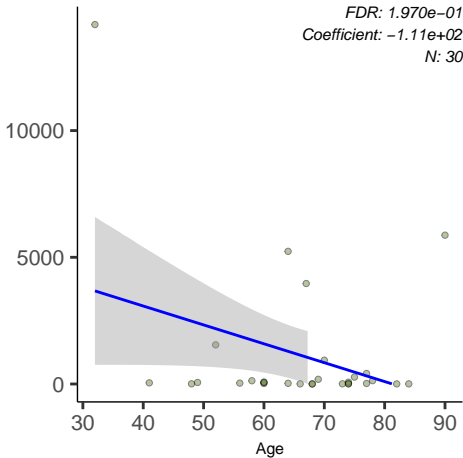

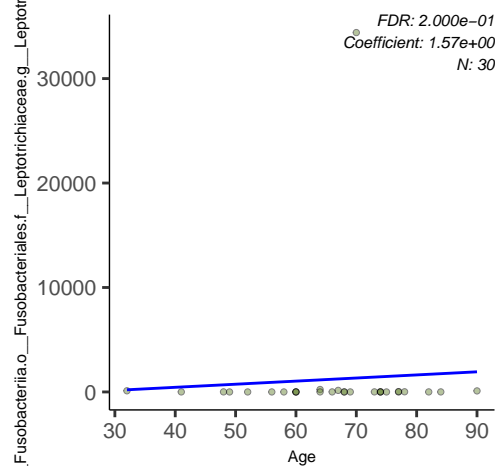

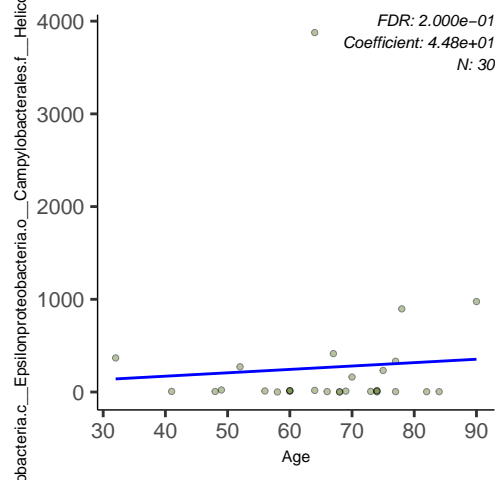

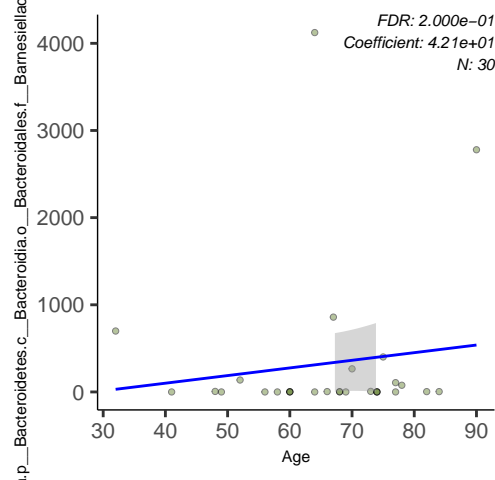

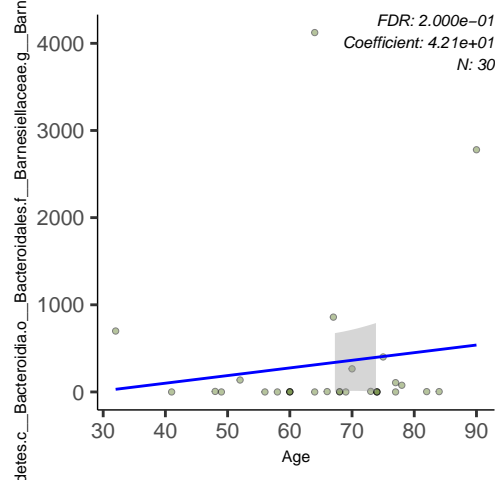



Clostridia.o\_\_Eubacteriales.f\_\_Eubacteriales.Family.XIII..Incertae.S

*FDR: 2.000e-01*  
*Coefficient: 7.86e+01*  
*N: 30*

6000

4000

2000

0

30

40

50

60

70

80

90

Age

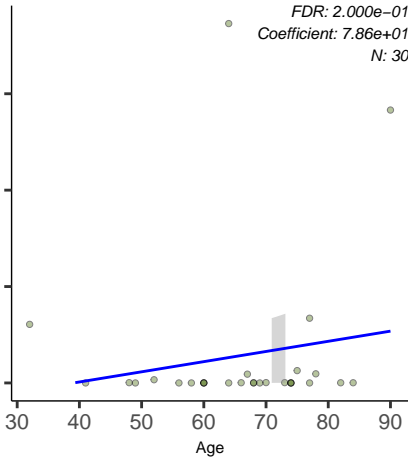

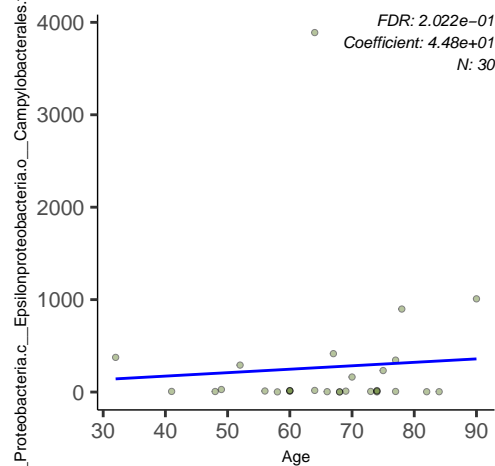

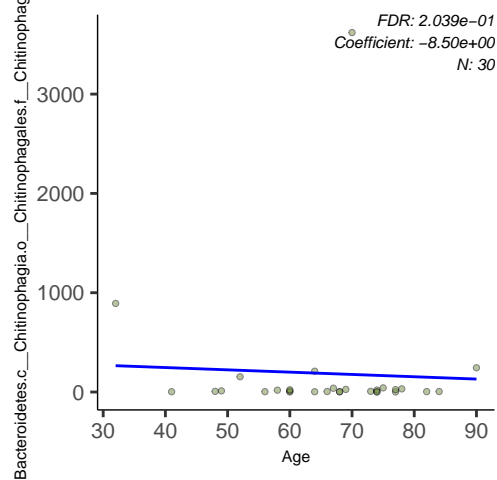

phylum: Bacteroidetes, class: Sphingobacteriia, order: Sphingobacteriales, family: Sphingobacteriaceae, genus: Sphingobacterium, species: Sphingobacterium

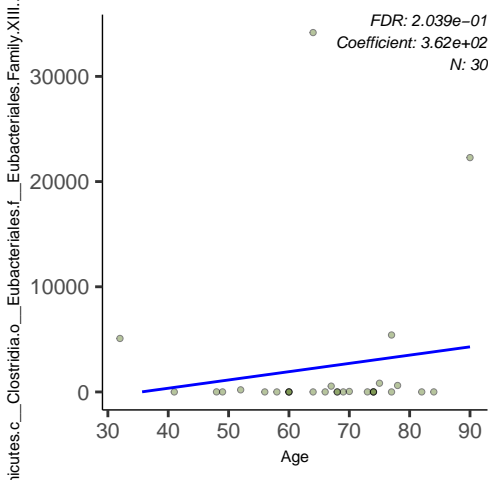

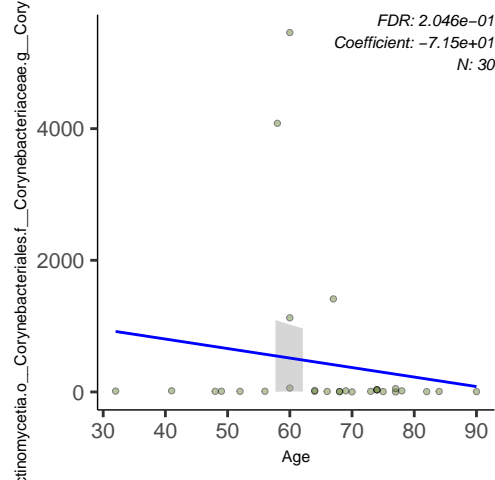

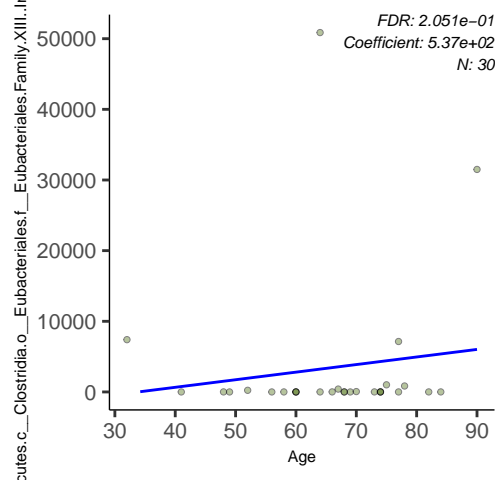

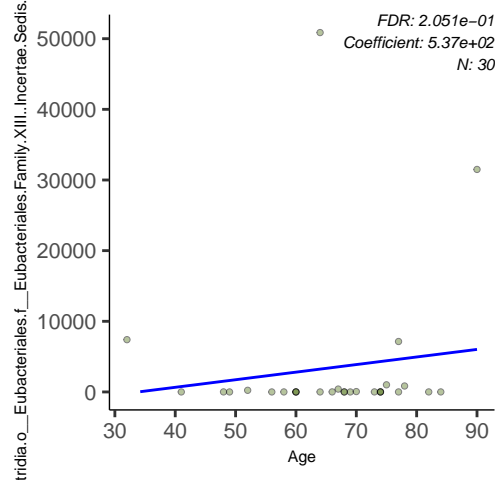

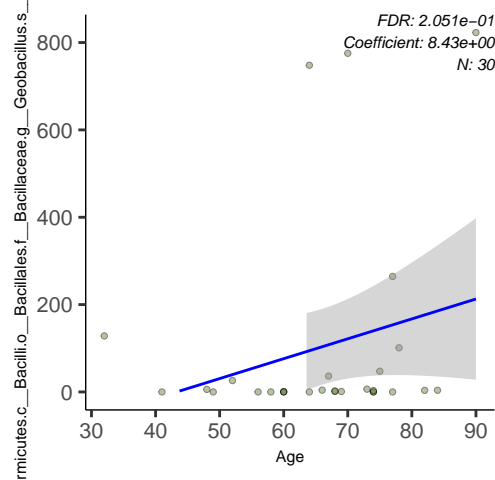



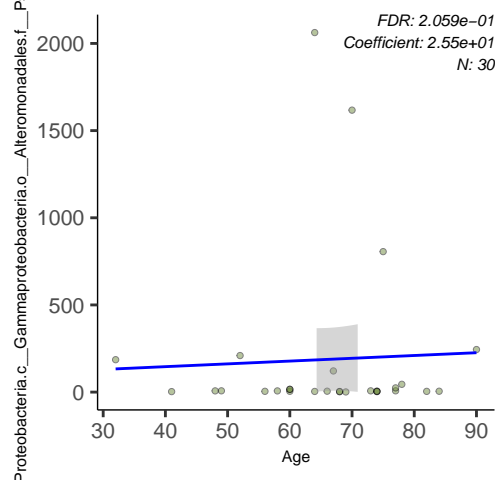

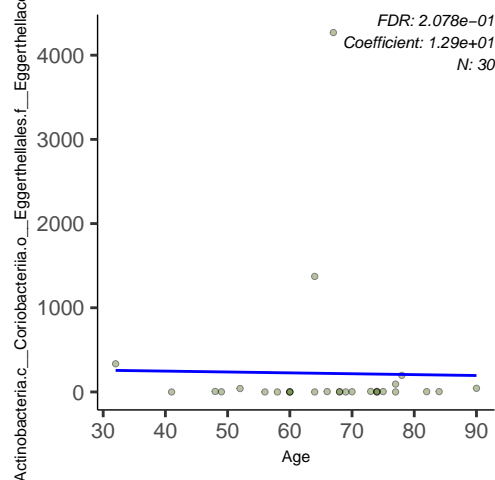

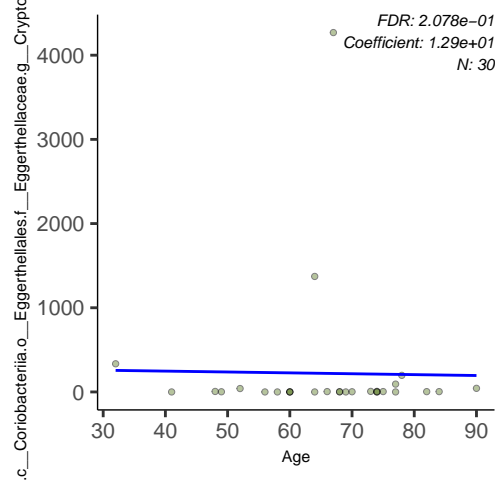

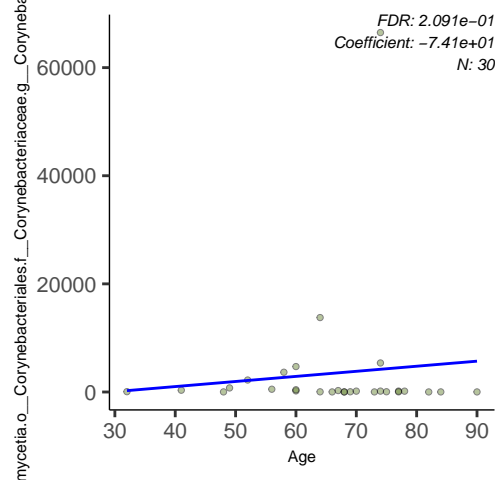

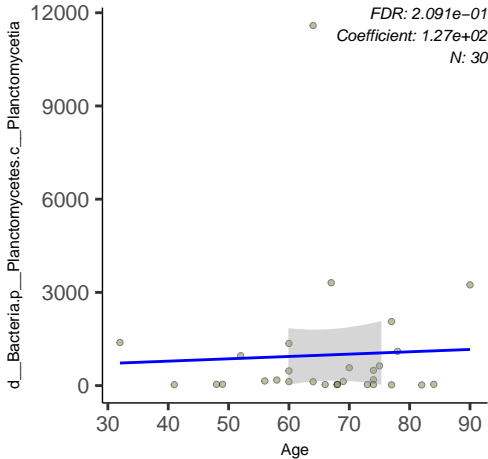

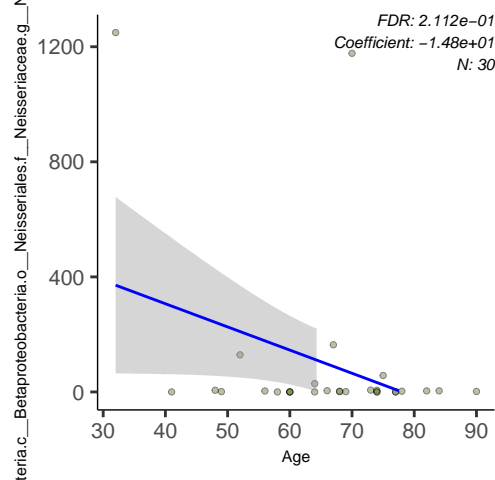

d\_Bacteria.p\_Planctomycetes

*FDR: 2.119e-01*

*Coefficient: 1.30e+02*

*N: 30*

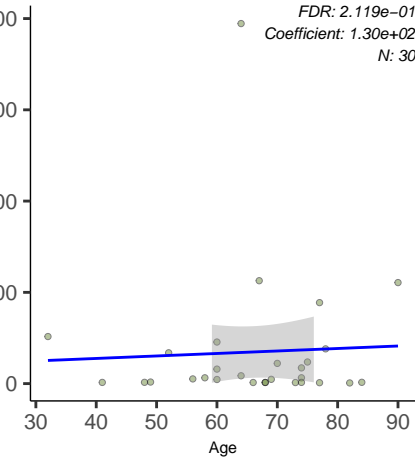

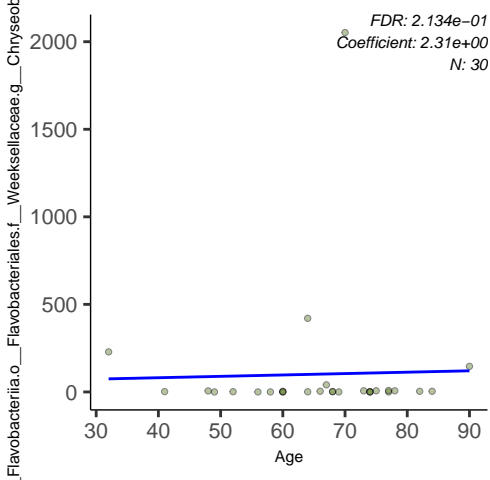



ia.p\_Firmicutes.c\_Clostridia.o\_Eubacteriales.f\_Clostridiaceae.g

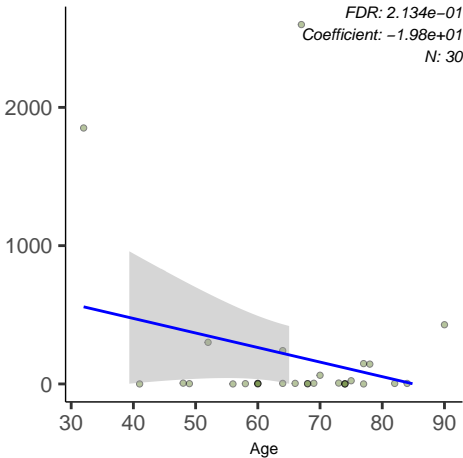

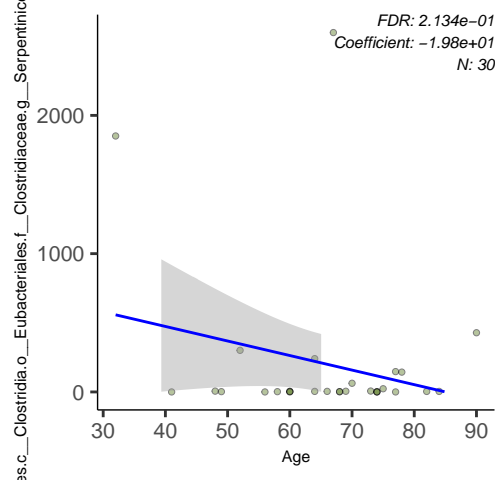

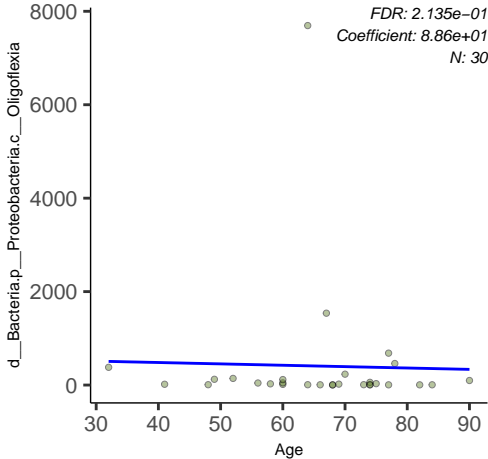

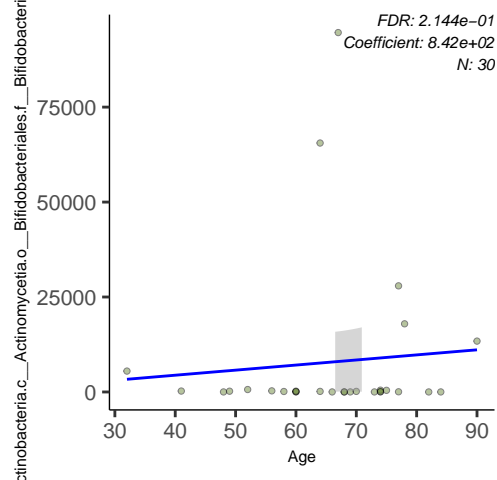

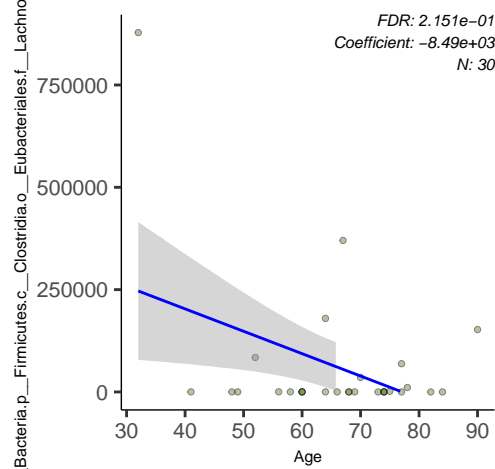

Clostridia.o\_\_Eubacteriales.f\_\_Eubacteriales.Family.XIII..Incertae.Se

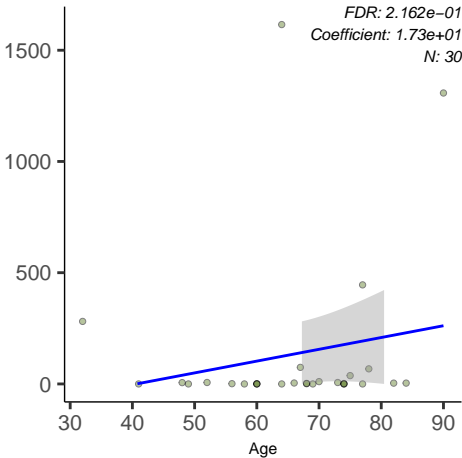

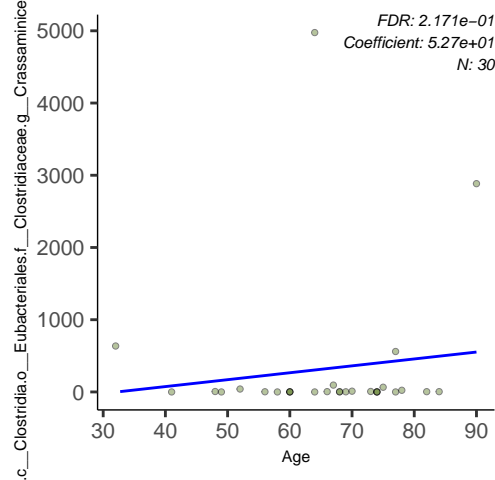

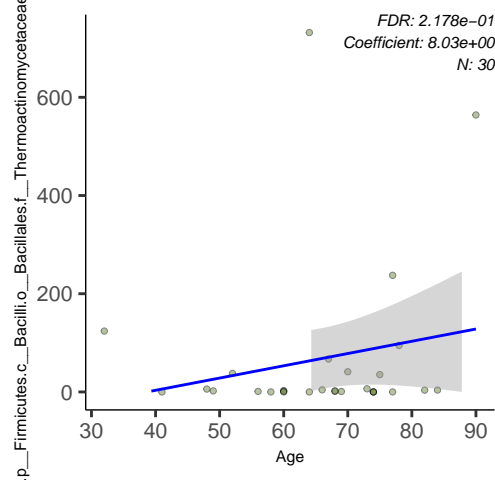



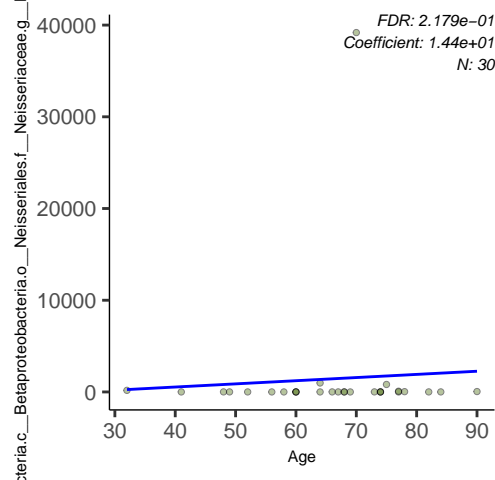

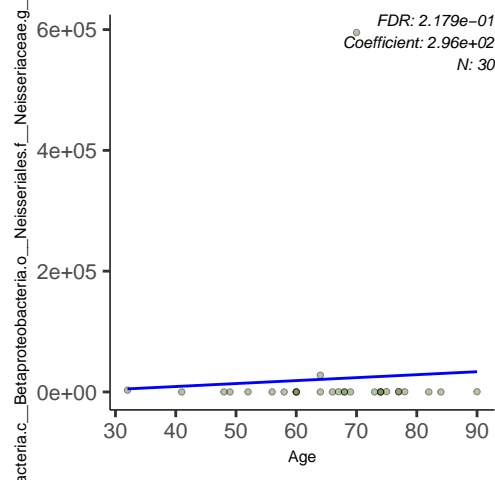

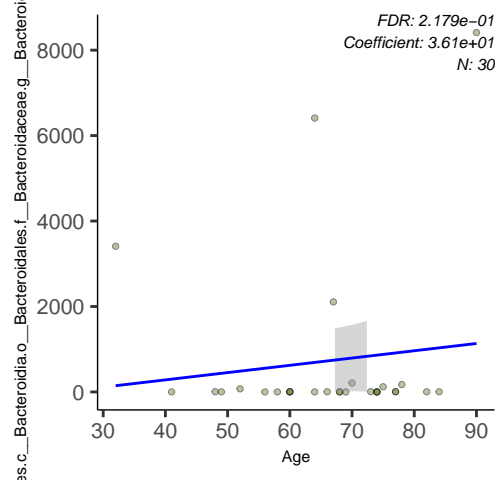

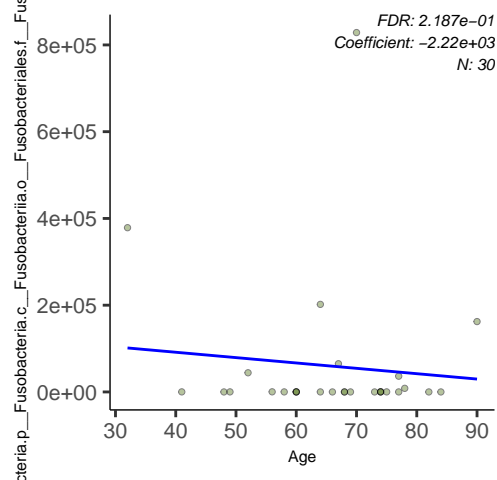

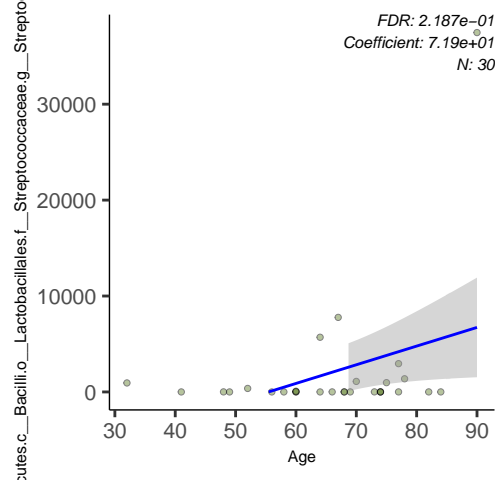

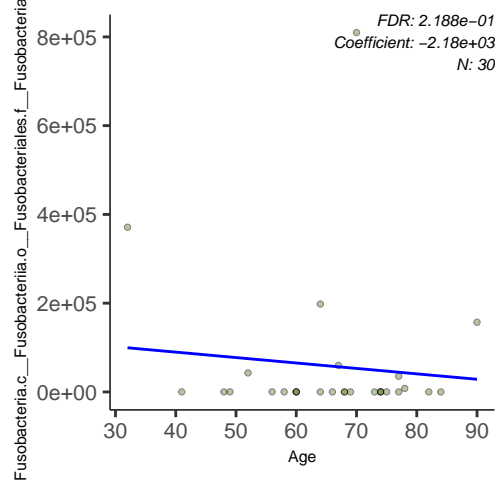

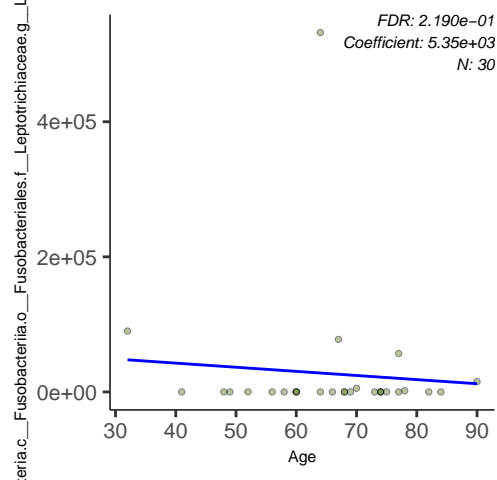

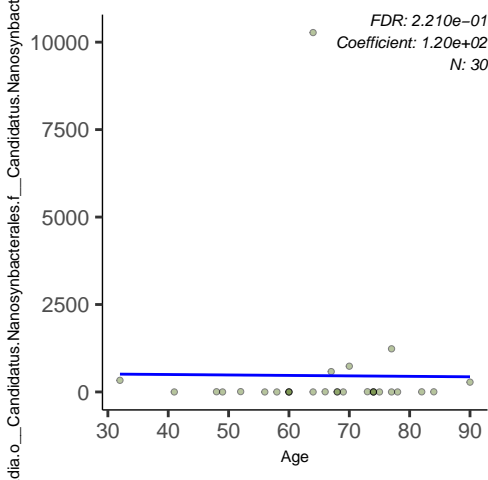



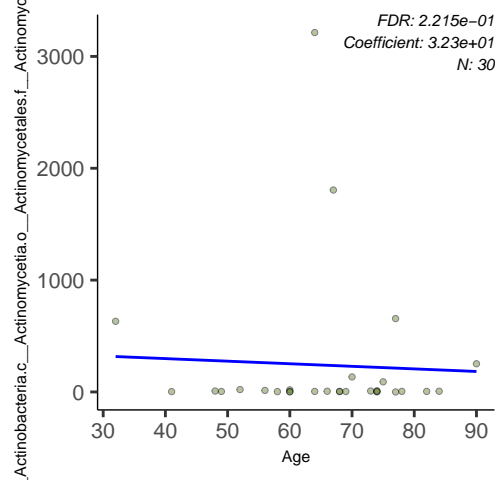

ia.p\_\_Firmicutes.c\_\_Clostridia.o\_\_Eubacteriales.f\_\_Lachnospiraceae

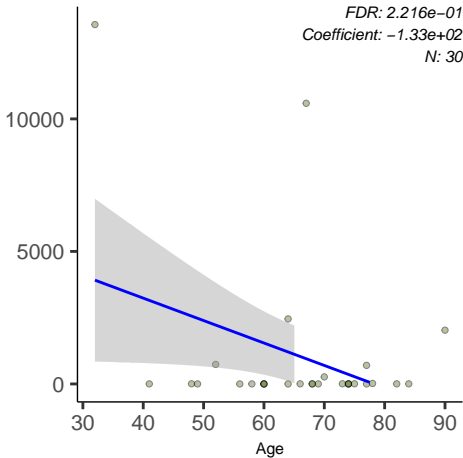

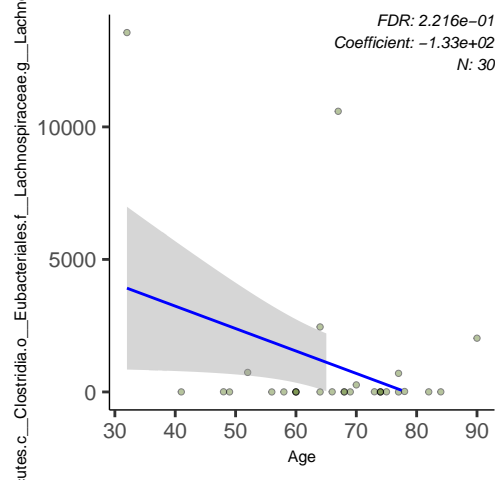

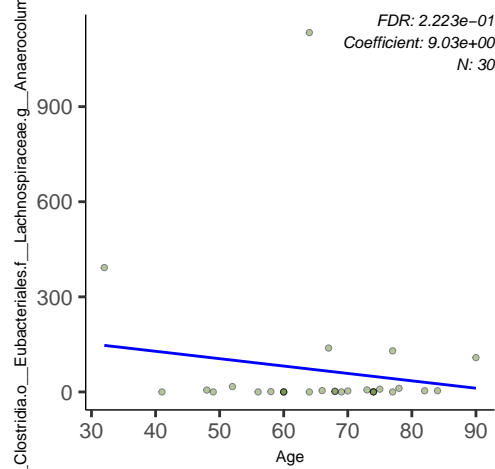

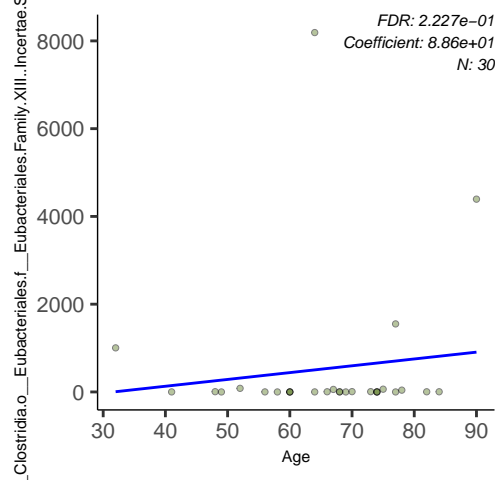

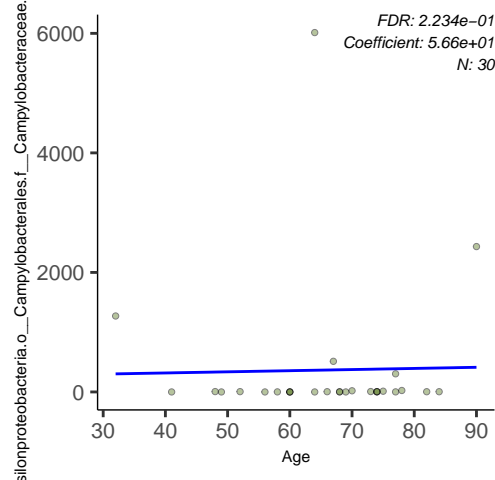

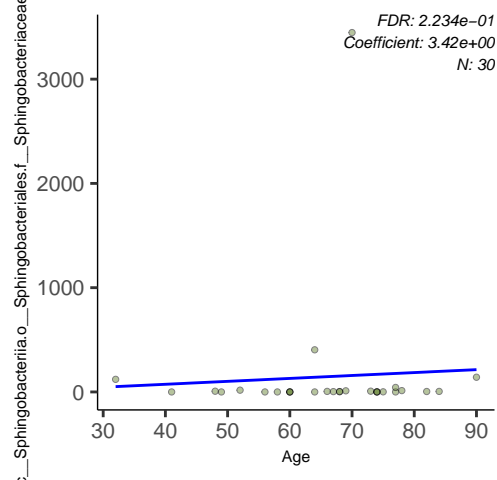

d\_\_Bacteria.p\_\_Nitrospirae.c\_\_Nitrospira

FDR: 2.234e-01  
Coefficient: 5.10e+00  
N: 30

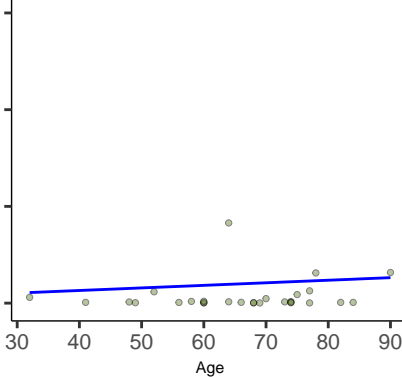



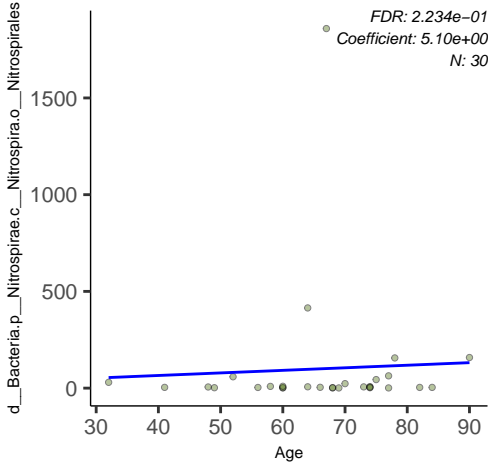

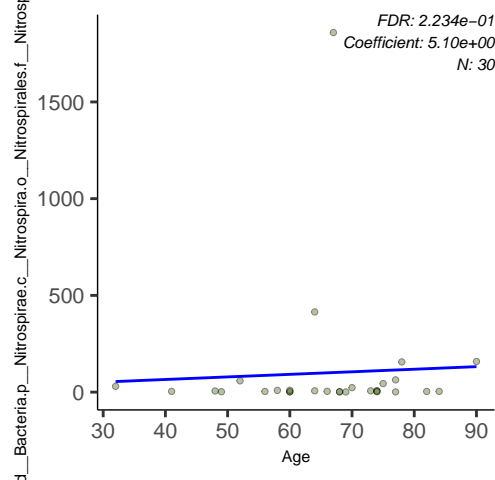

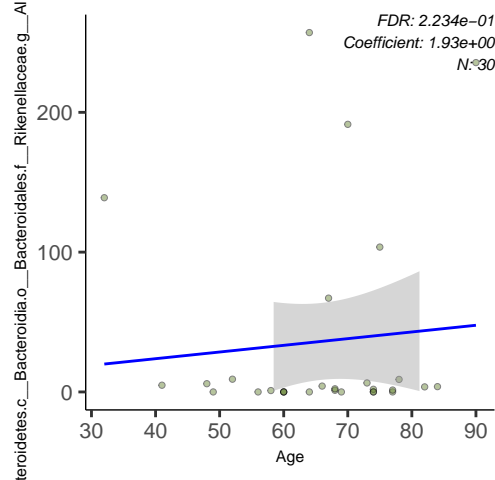

p\_Firmicutes.c\_\_Clostridia.o\_\_Eubacteriales.f\_\_Peptococcaceae.g

FDR:  $2.234e-01$   
Coefficient:  $4.81e+01$   
N: 30

4000  
2000  
0

30 40 50 60 70 80 90  
Age

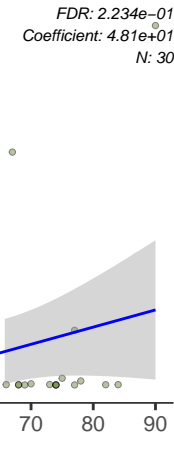

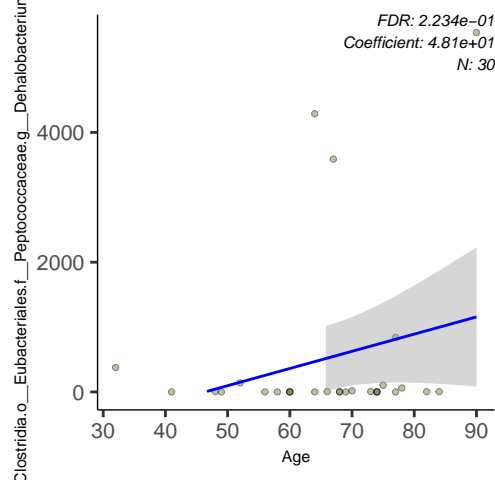

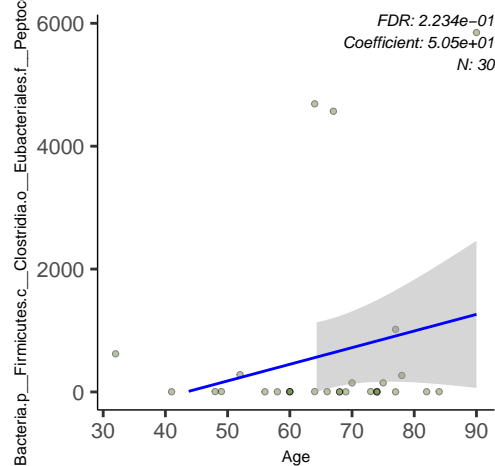

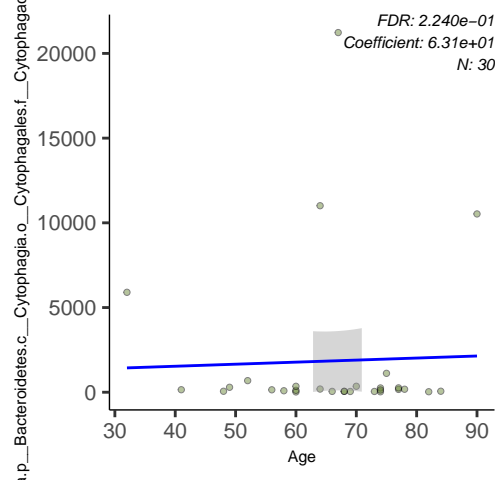

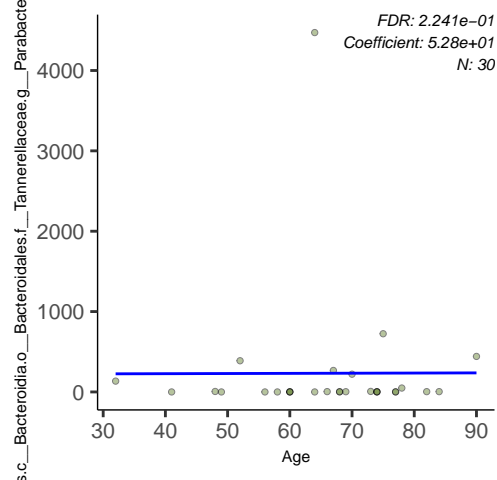



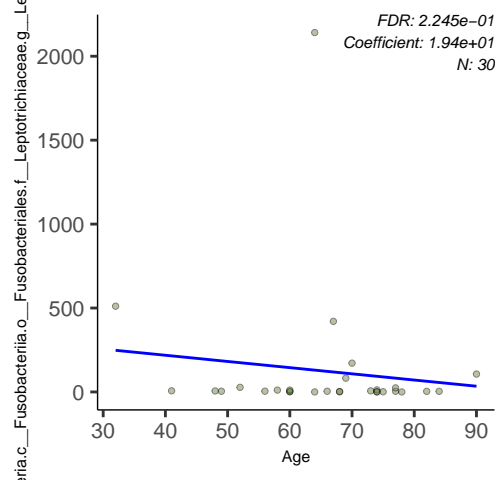

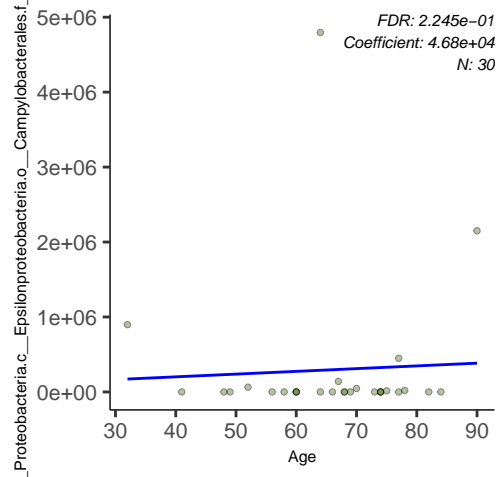

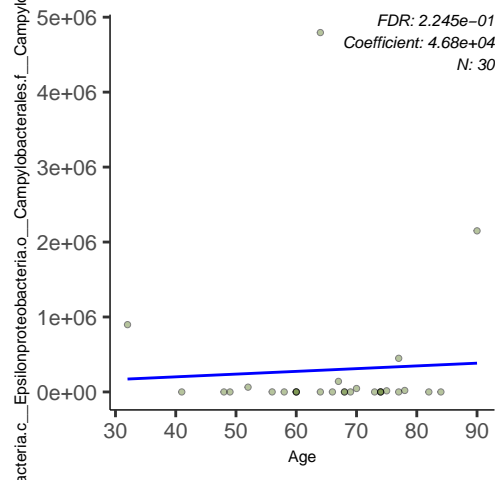

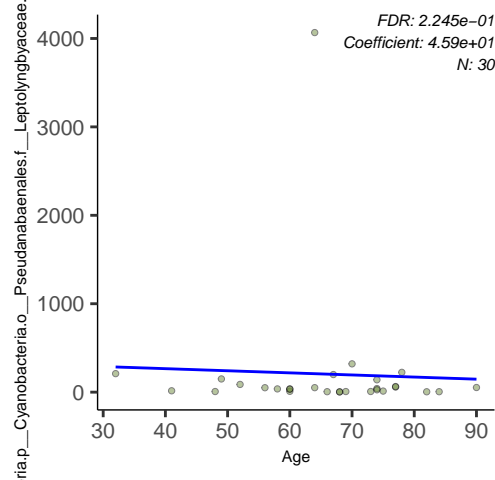

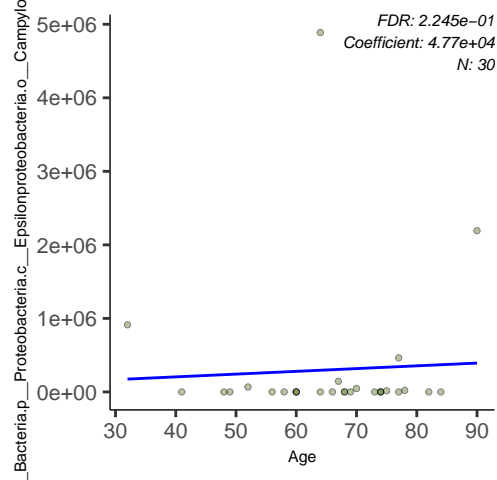

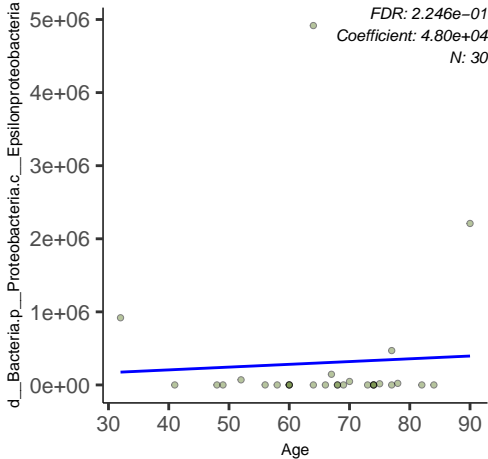

eroidetes.c\_\_Bacteroidia.o\_\_Bacteroidales.f\_\_Rikenellaceae.g\_\_Ali

*FDR: 2.250e-01*  
*Coefficient: 3.66e+00*  
*N: 30*

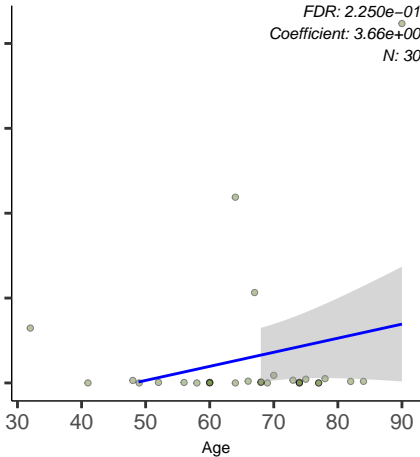

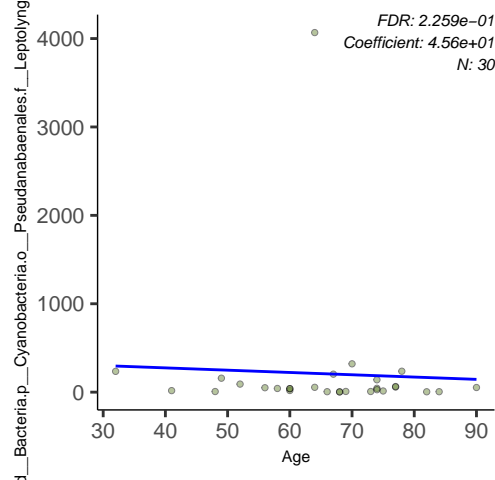



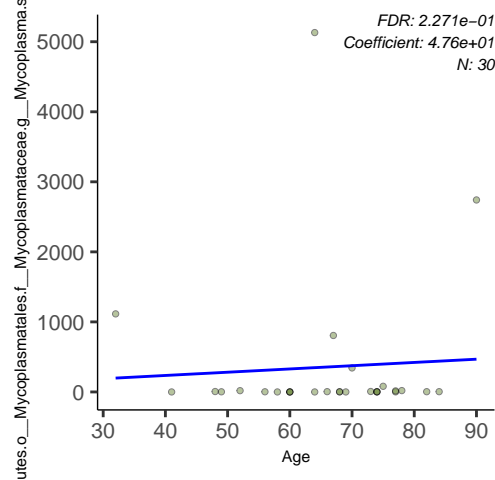

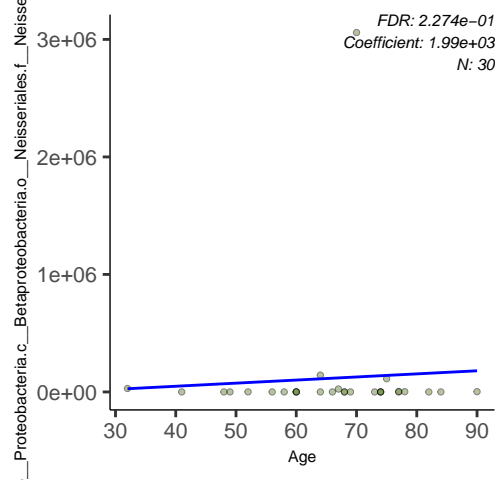

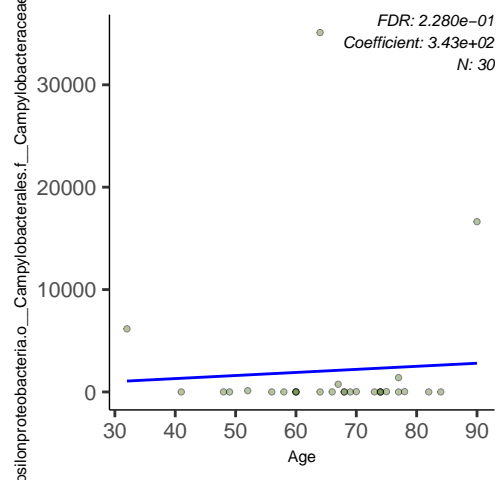

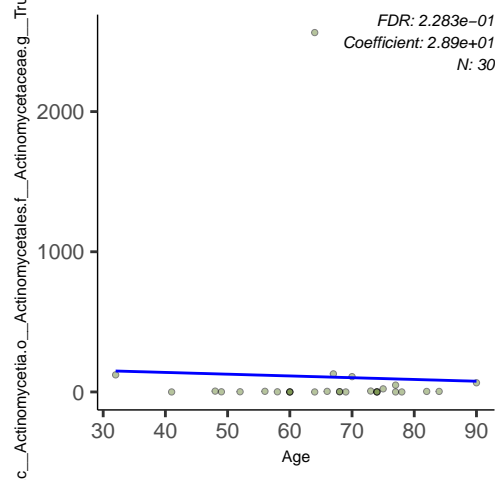

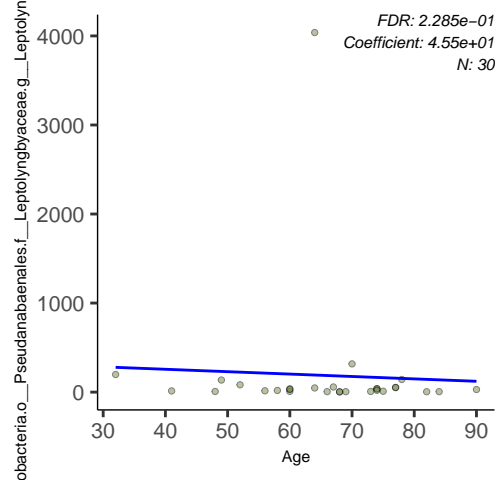

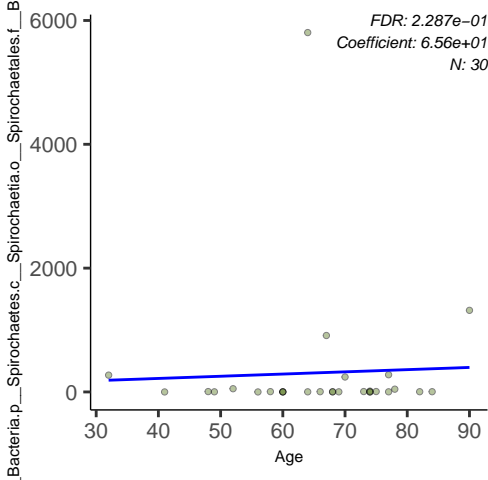

ilonproteobacteria.o\_\_Campylobacteraceae

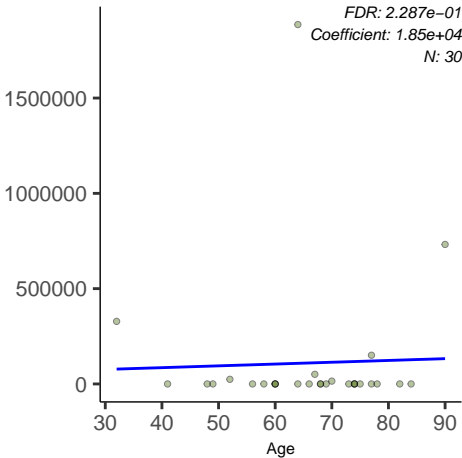

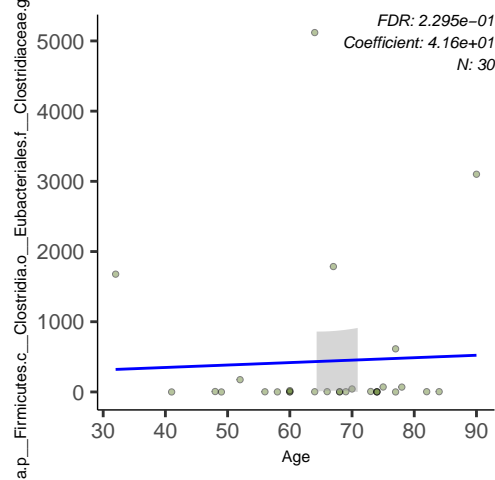



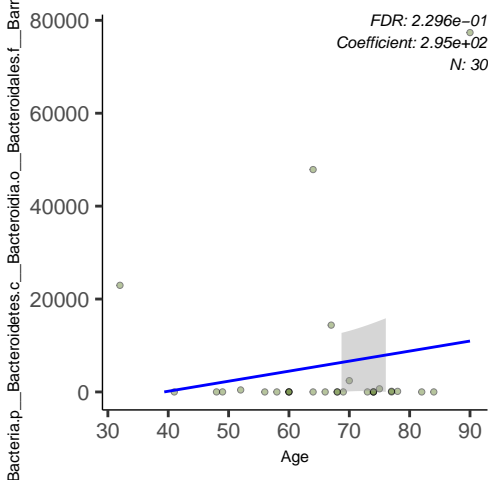

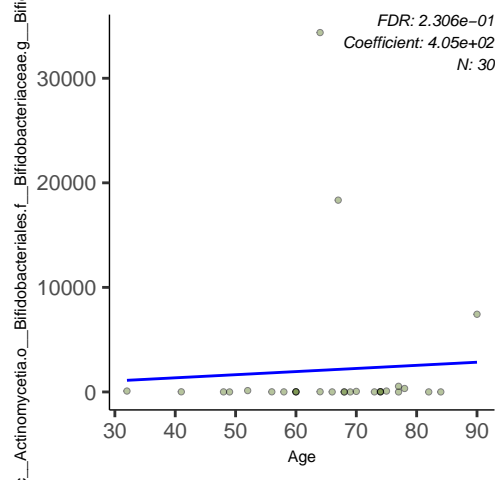

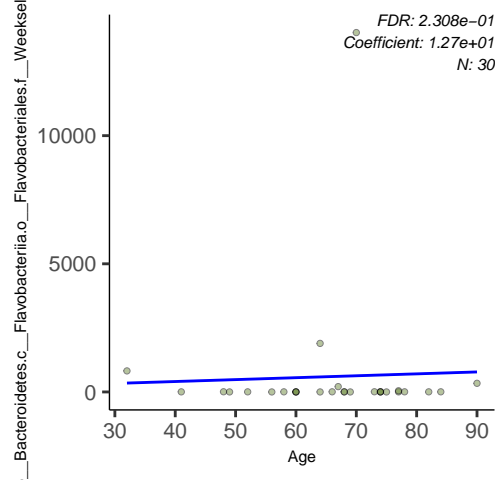

letes.c\_\_Flavobacteriia.o\_\_Flavobacteriales.f\_\_Weeksellaceae.g\_\_E

*FDR: 2.308e-01*  
*Coefficient: 1.27e+01*  
*N: 30*

10000

5000

0

30

40

50

60

70

80

90

Age

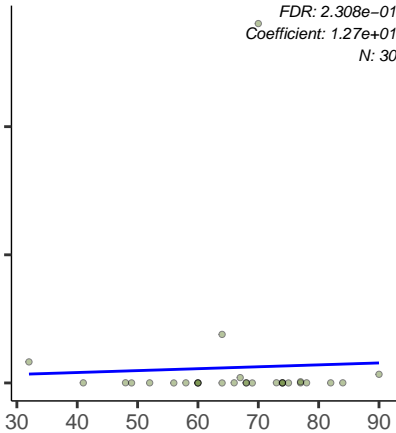

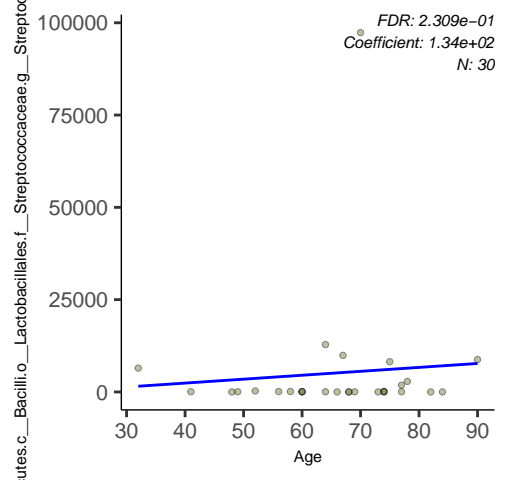

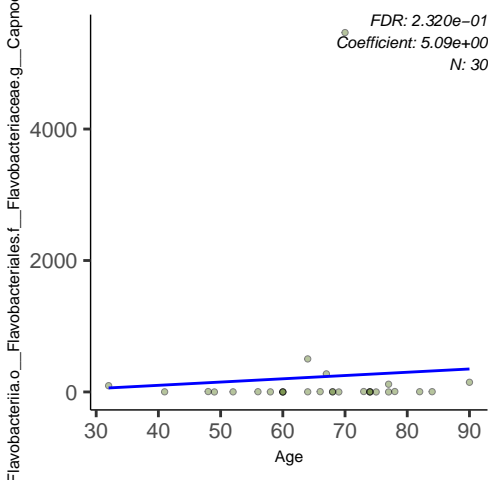

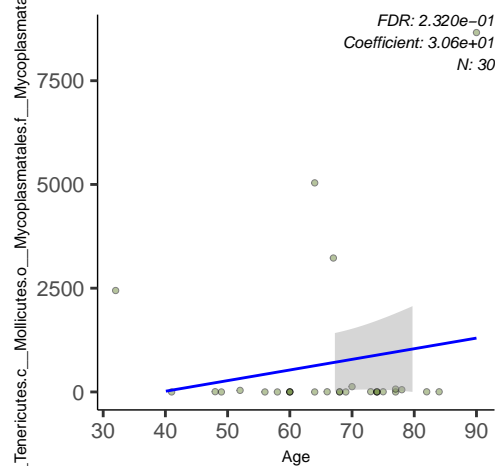

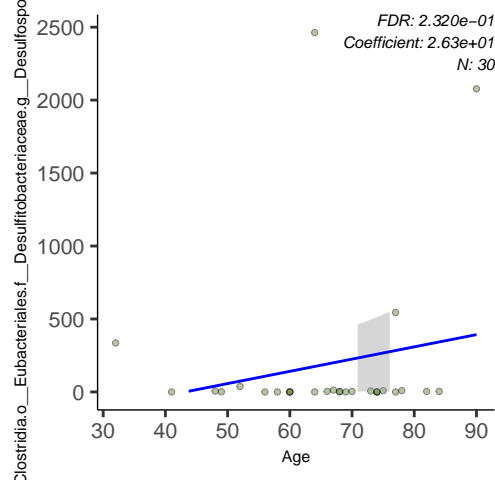



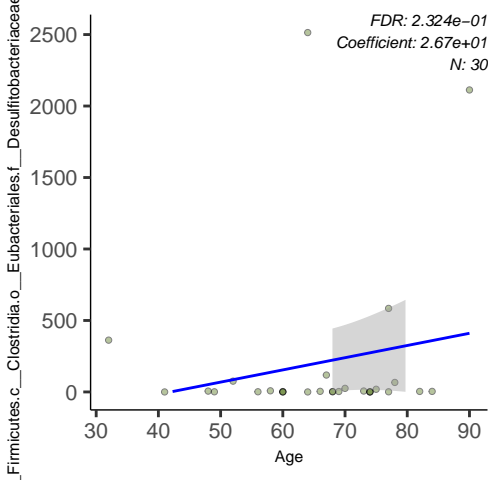

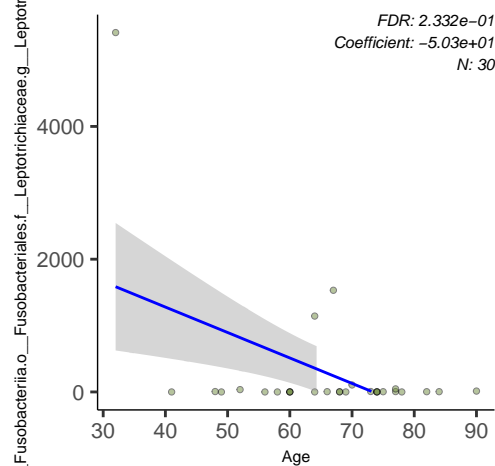

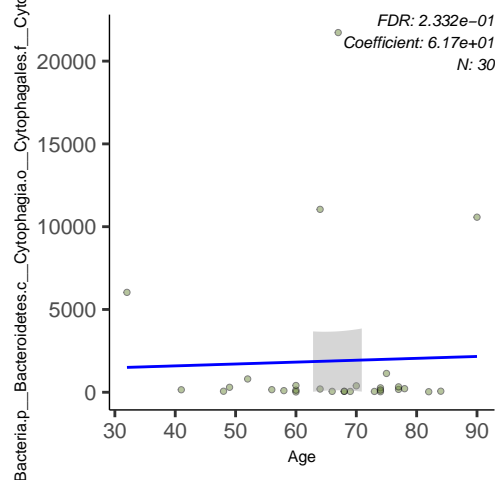

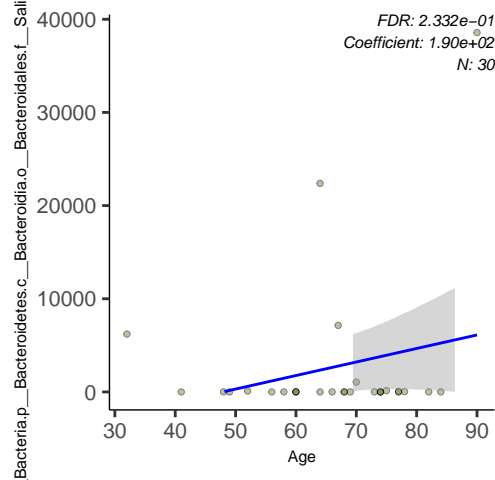

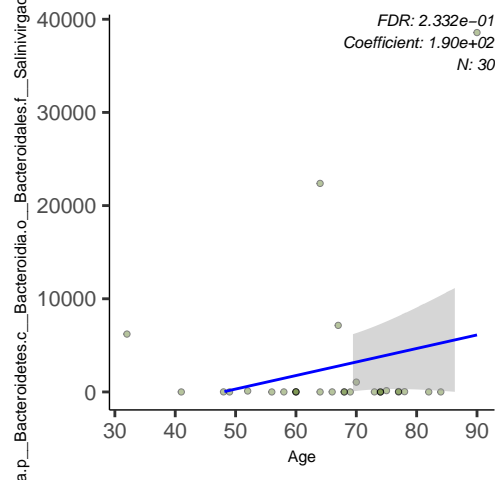

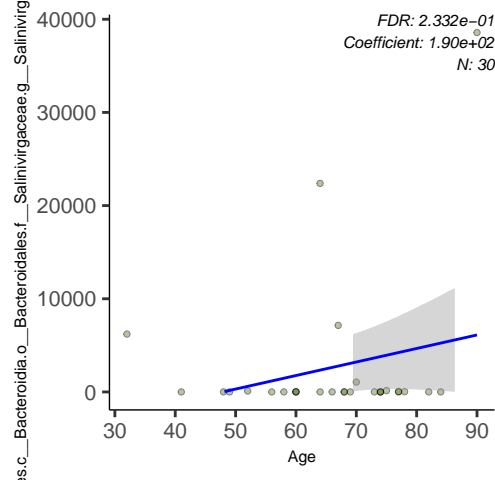

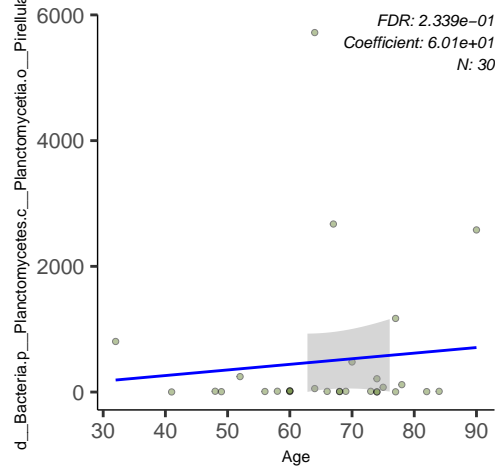

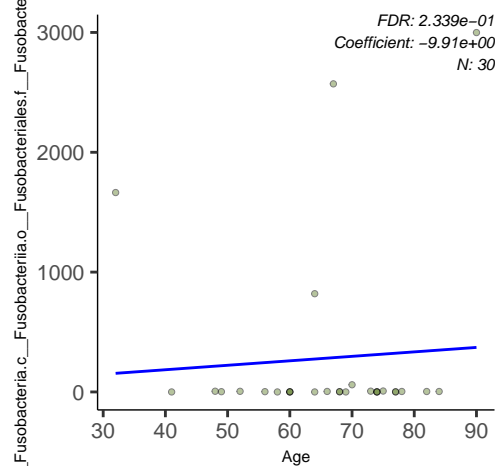



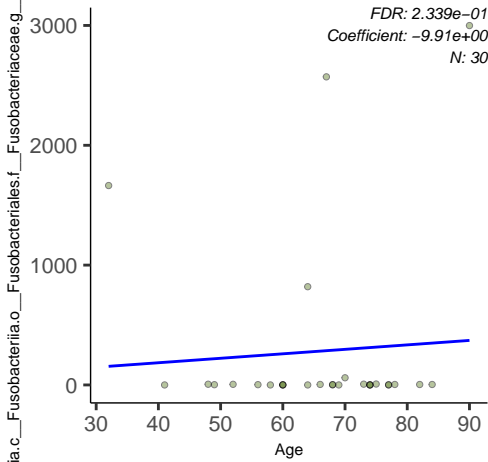

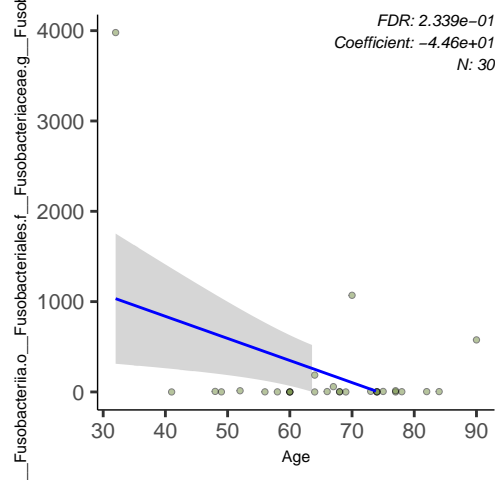

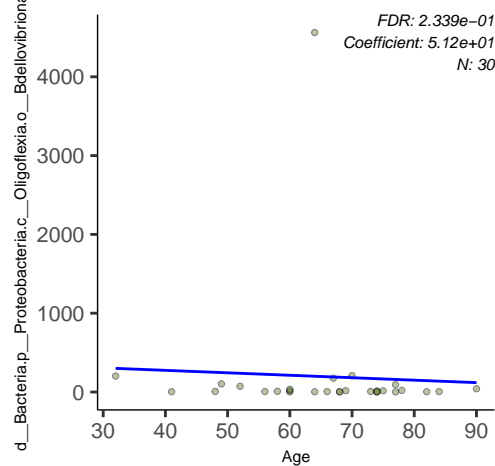

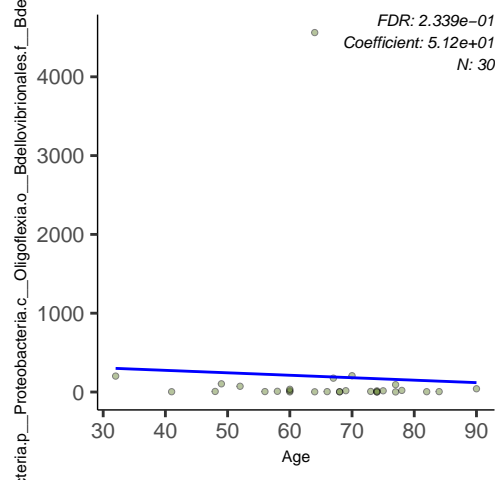

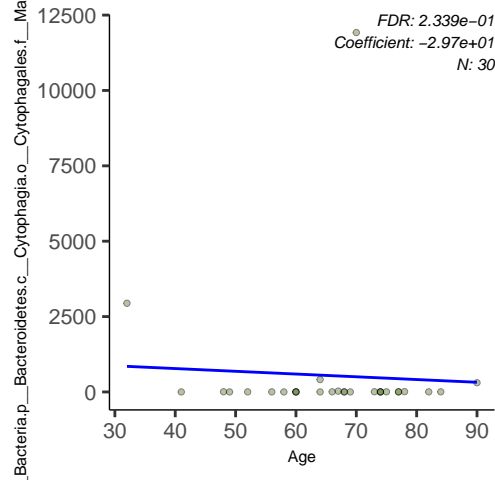

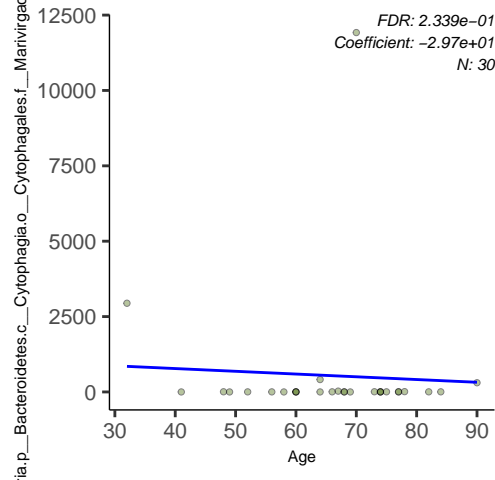

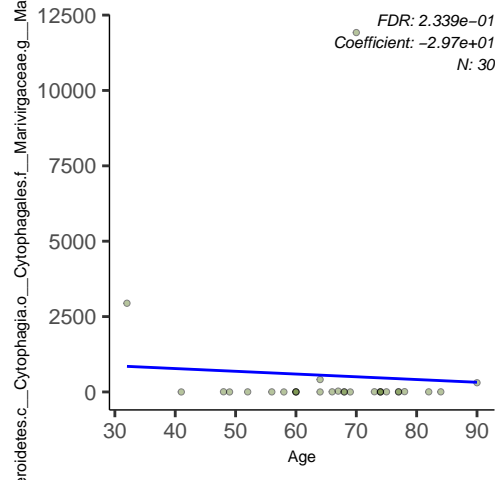

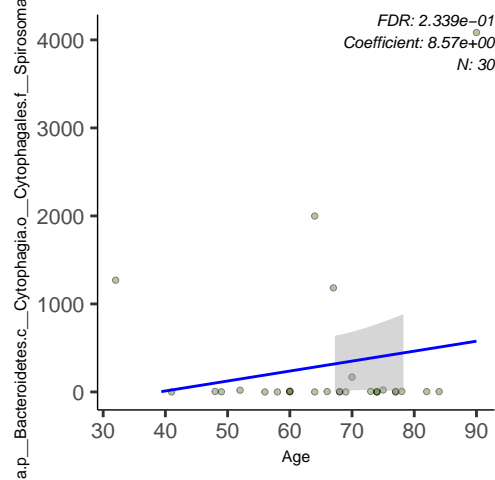



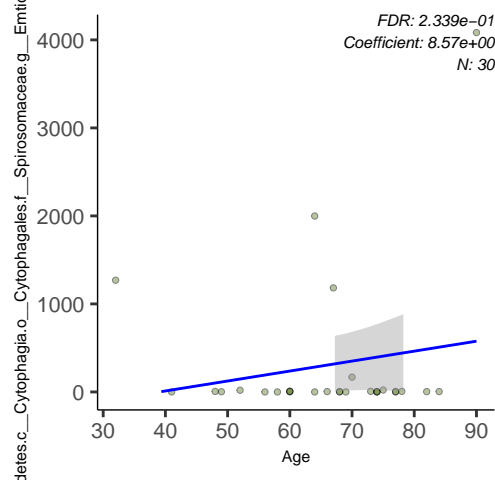

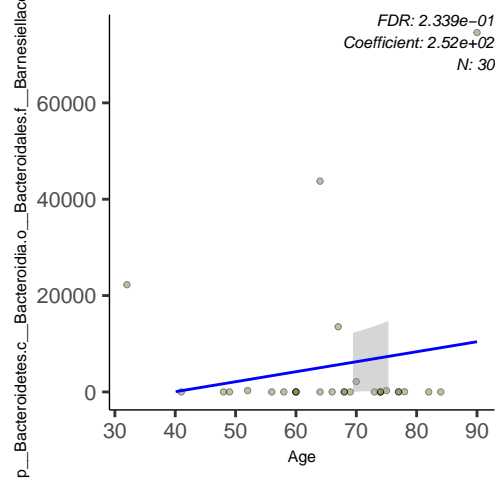

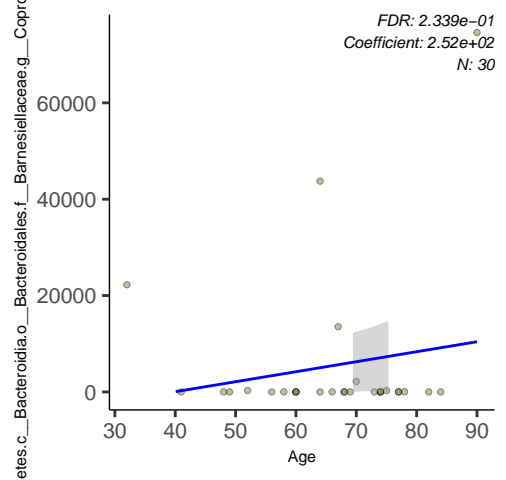

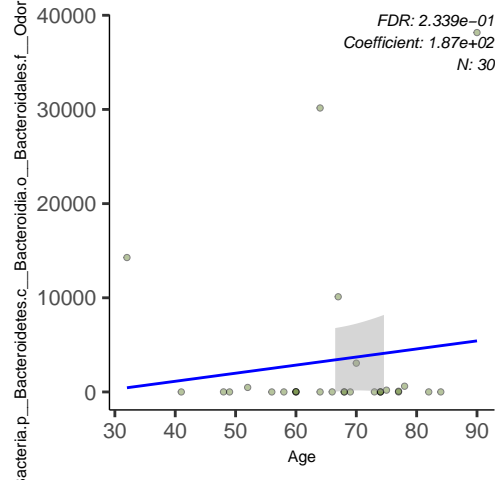

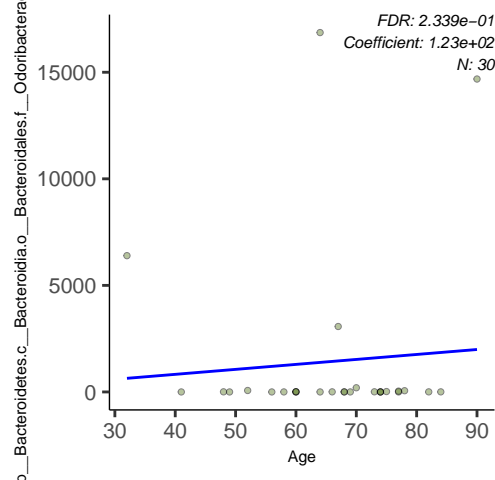

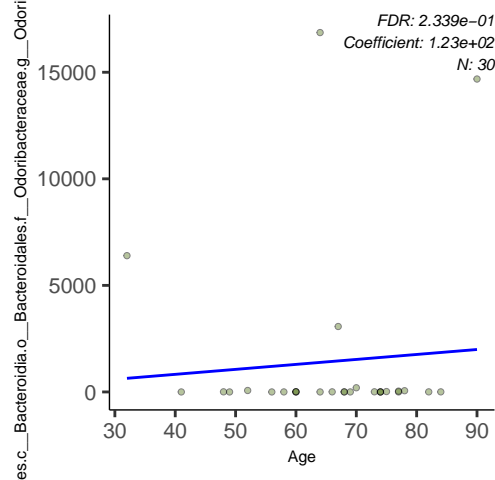

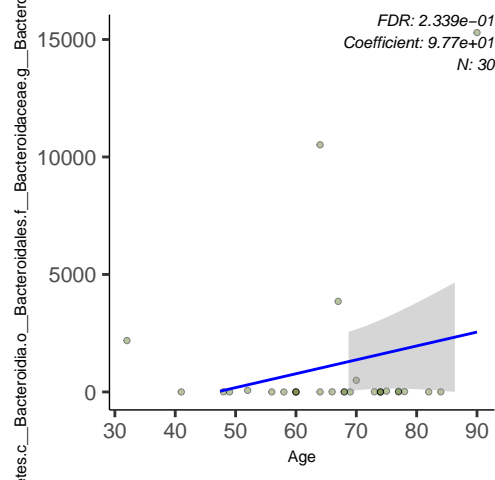

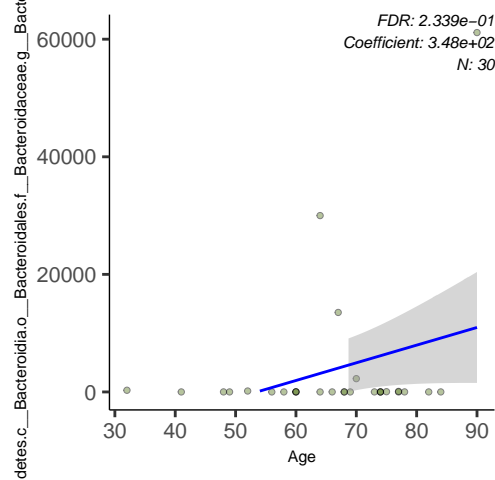



ria.p\_\_Firmicutes.c\_\_Clostridia.o\_\_Eubacteriales.f\_\_Eubacteriaceae

*FDR: 2.339e-01*  
*Coefficient: 6.17e+01*  
*N: 30*

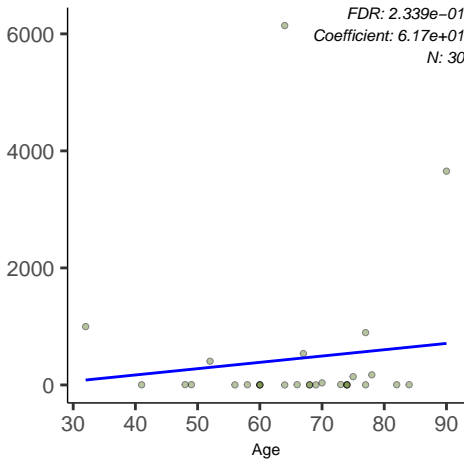

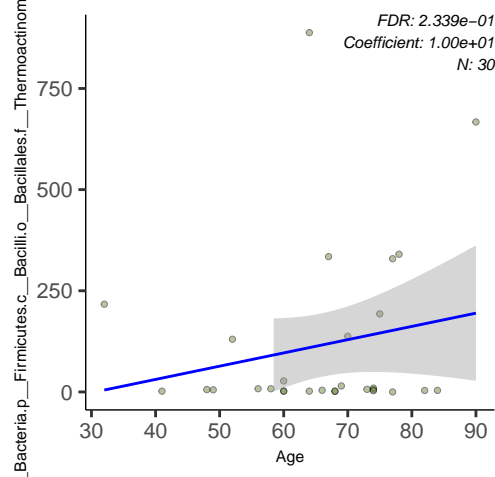

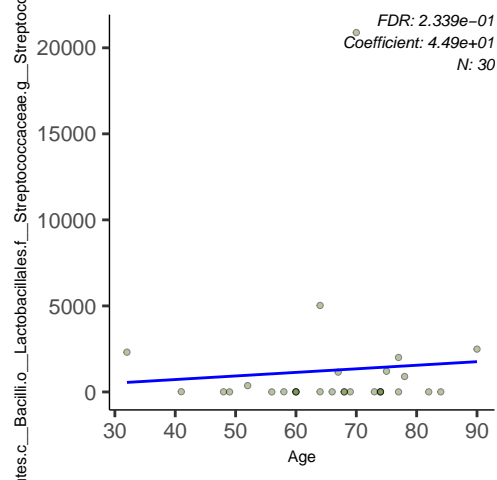

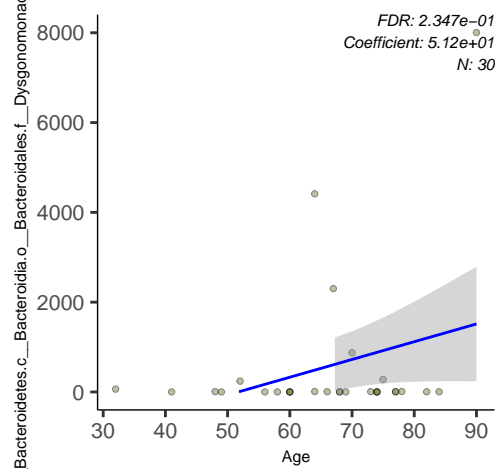

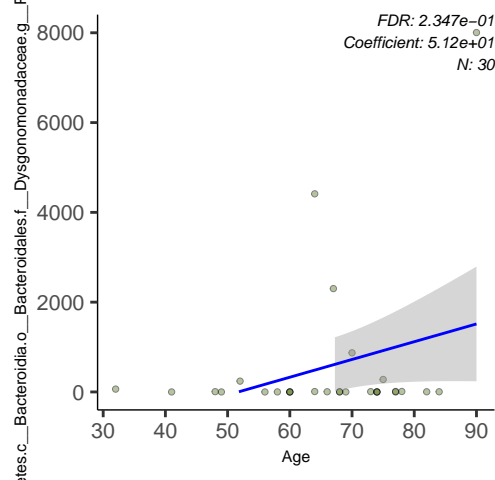

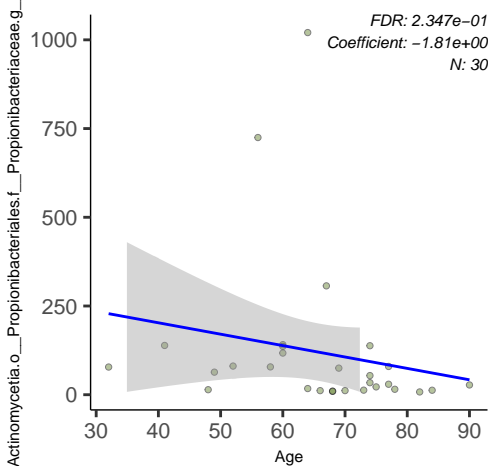

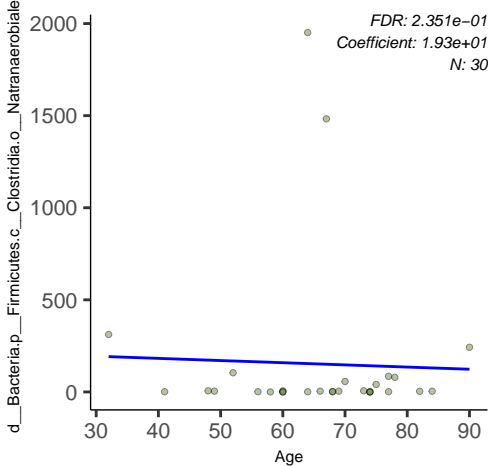

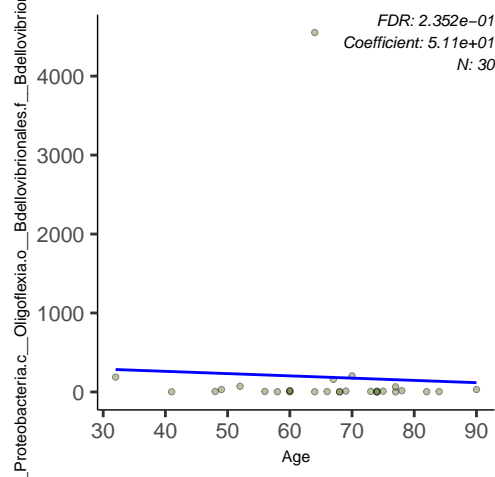



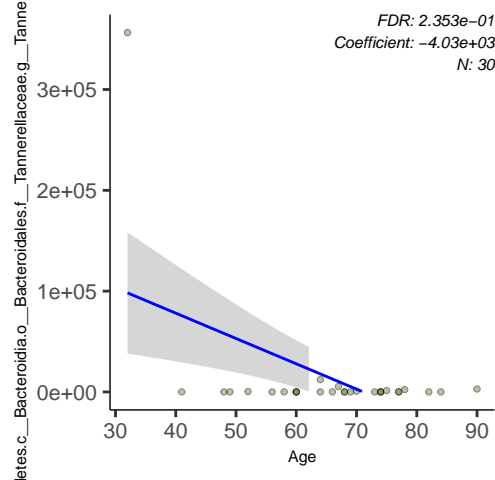

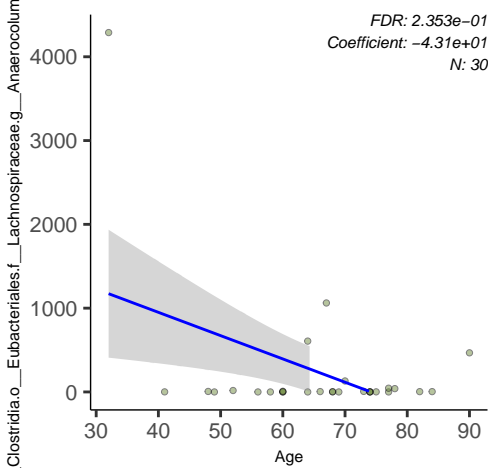

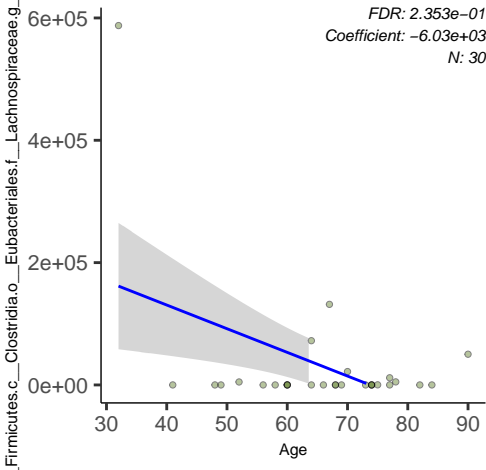

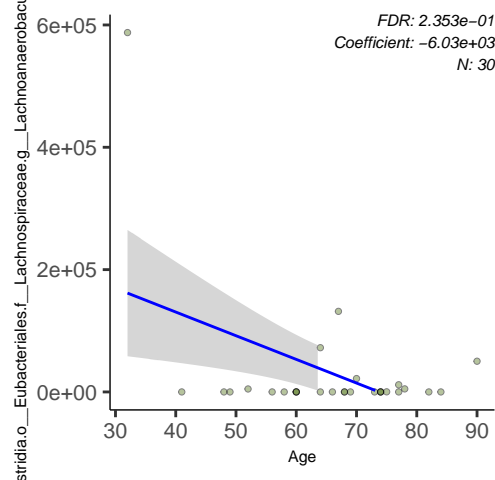

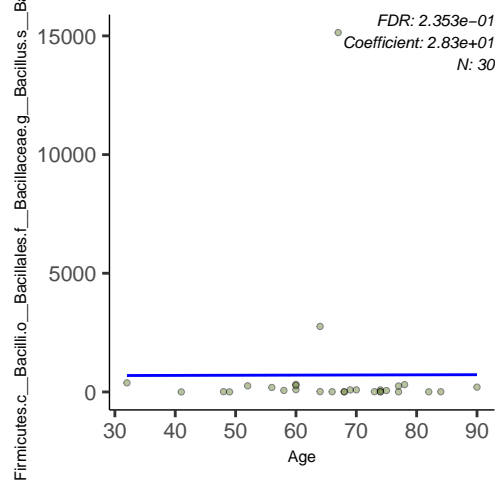

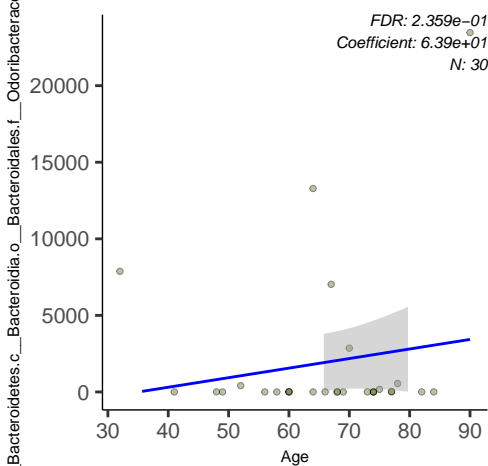

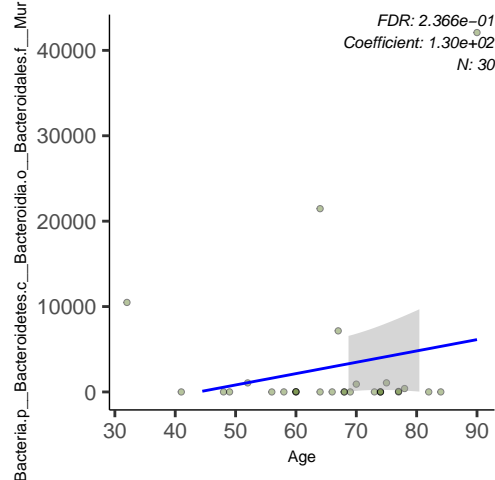

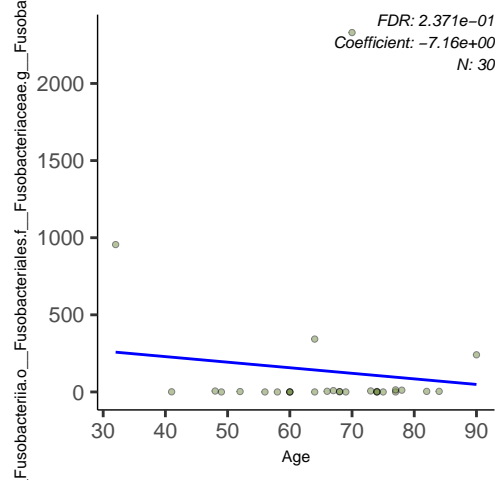



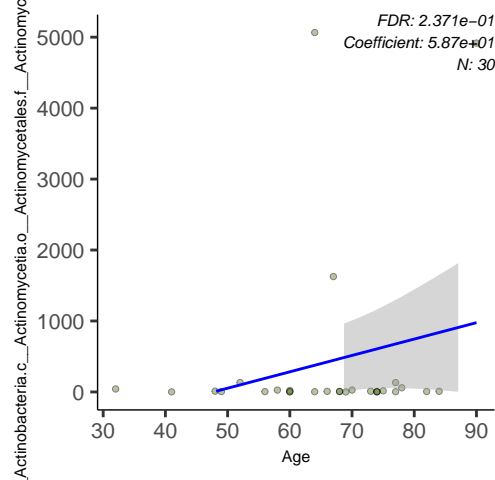

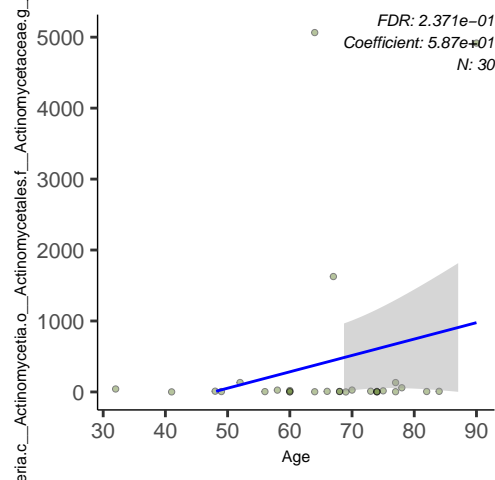

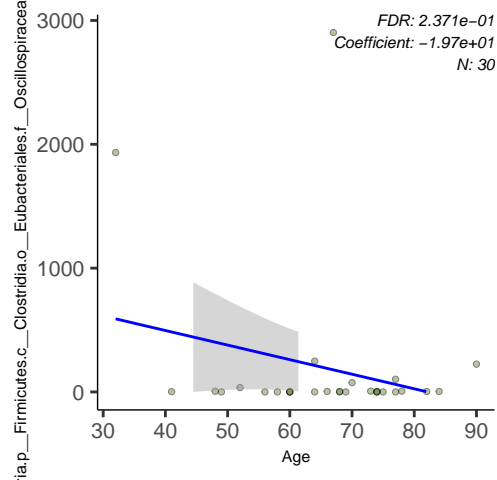

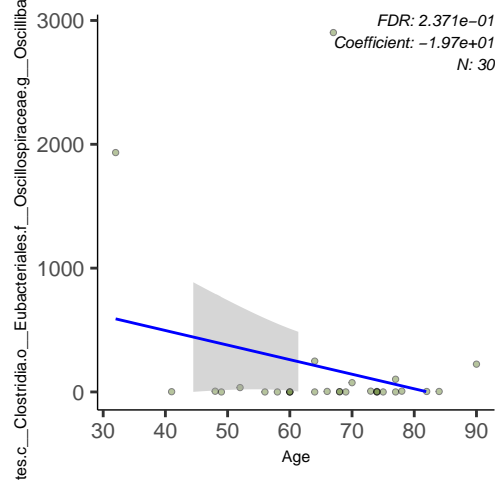

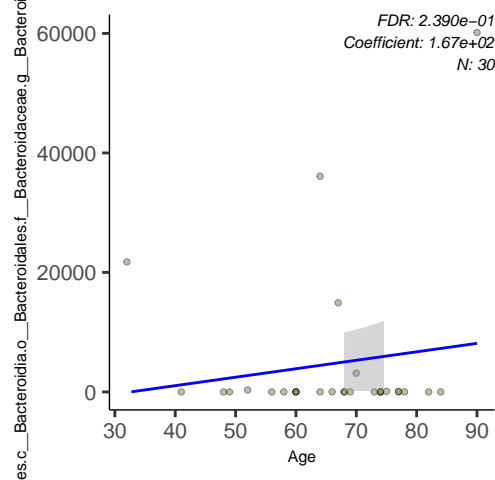

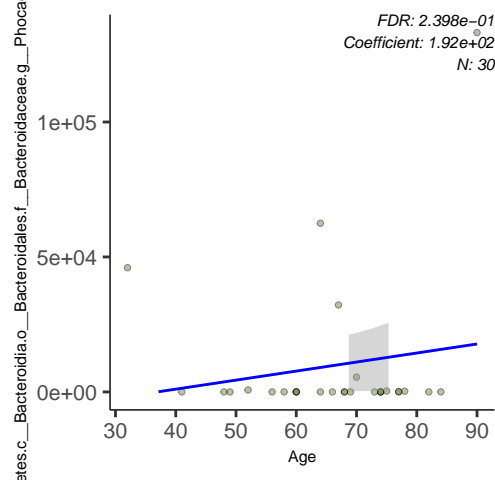

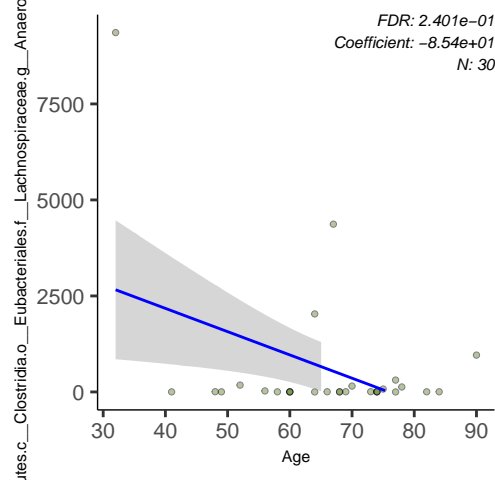

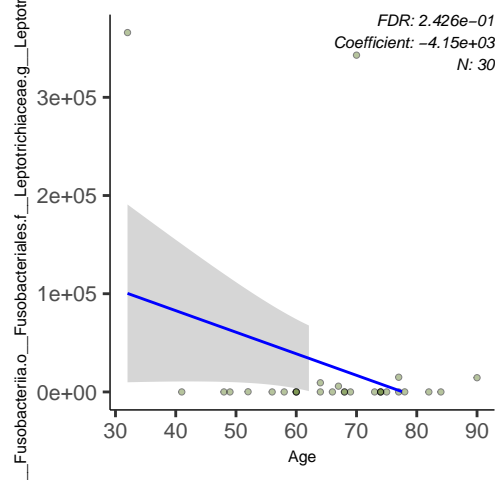



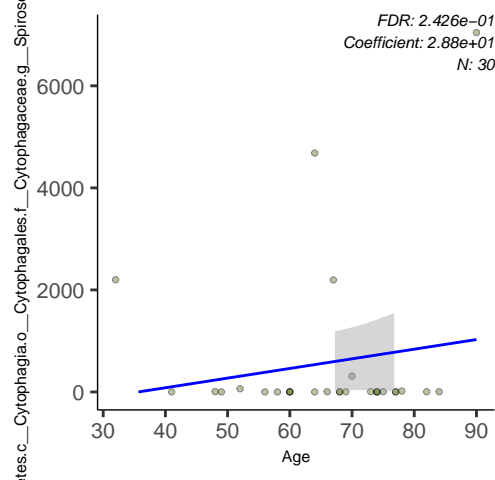

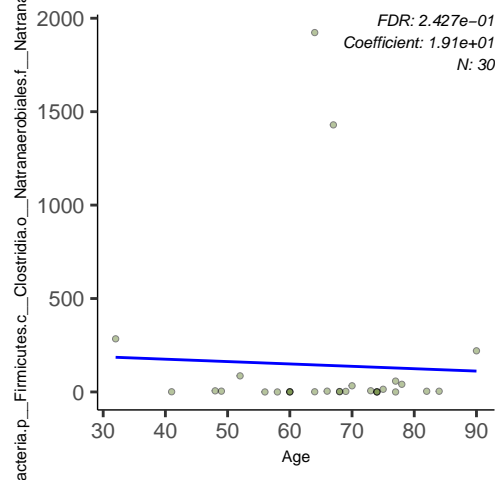

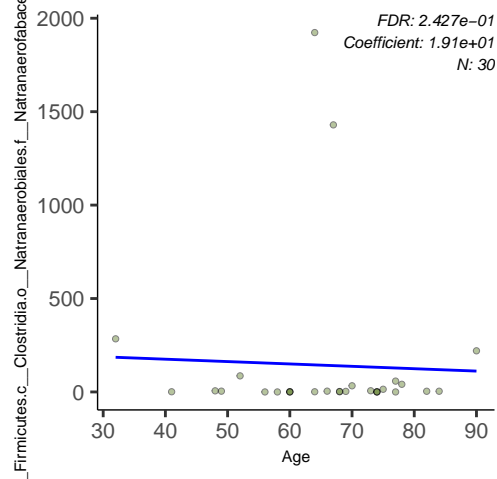

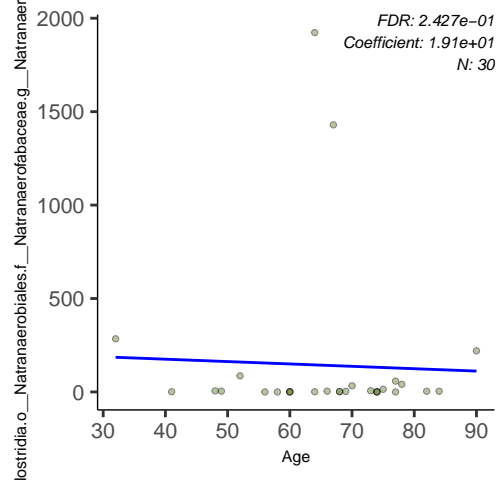

a.p\_Firmicutes.c\_Clostridia.o\_Eubacteriales.f\_Lachnospiraceae

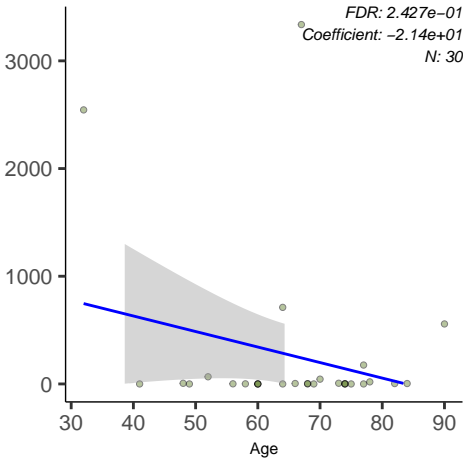

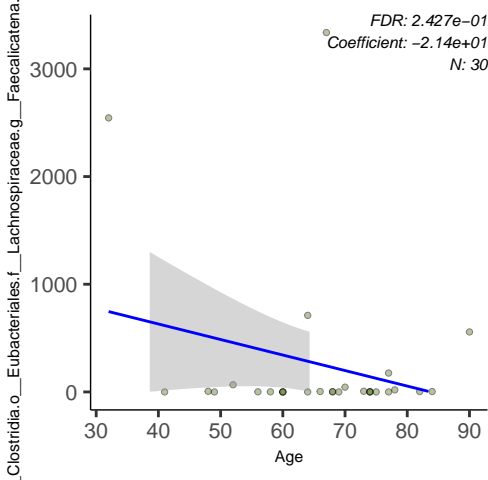

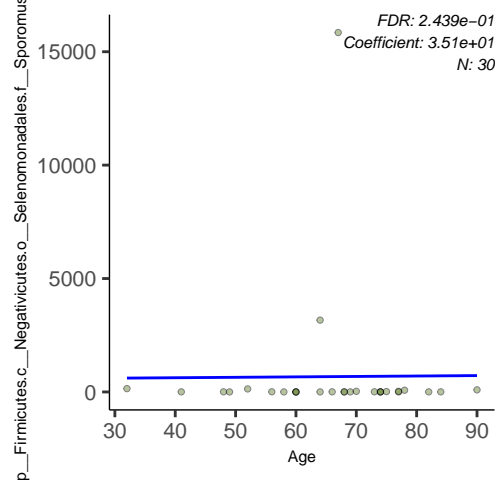

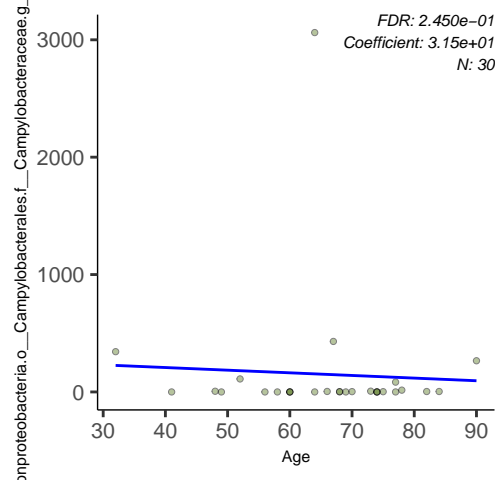



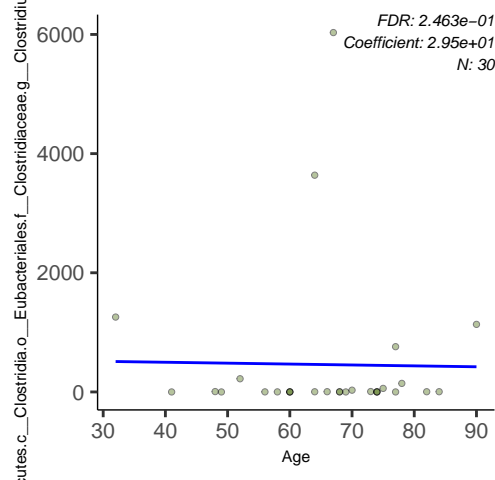

a.p\_\_Firmicutes.c\_\_Clostridia.o\_\_Eubacteriales.f\_\_Lachnospiraceae

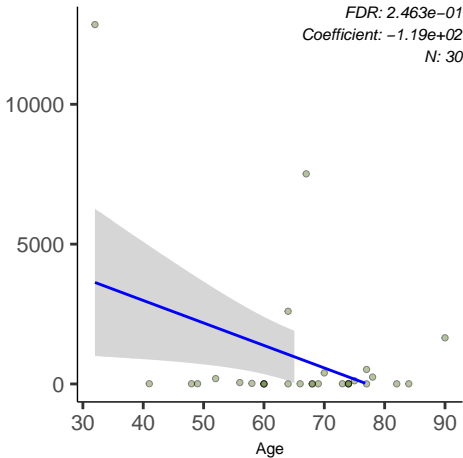

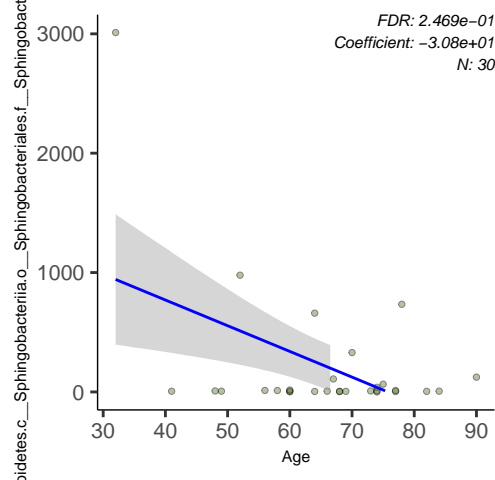

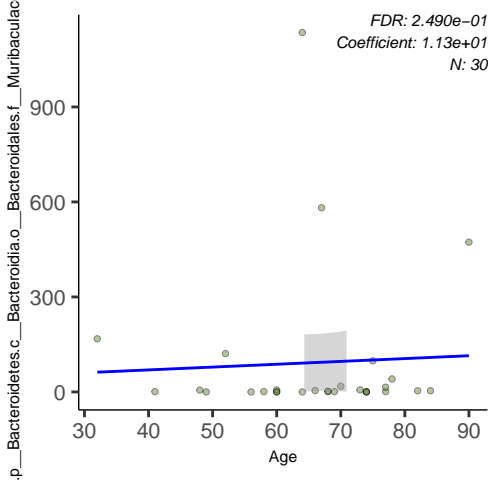

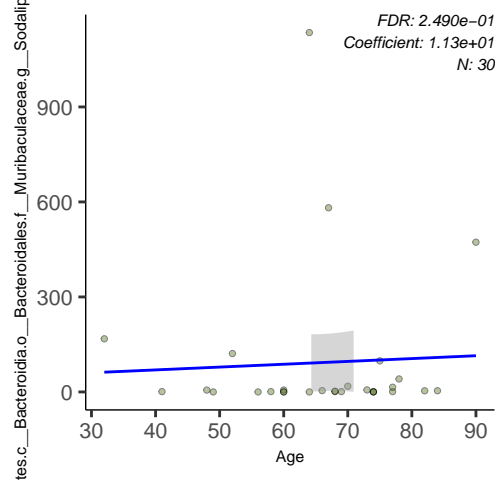

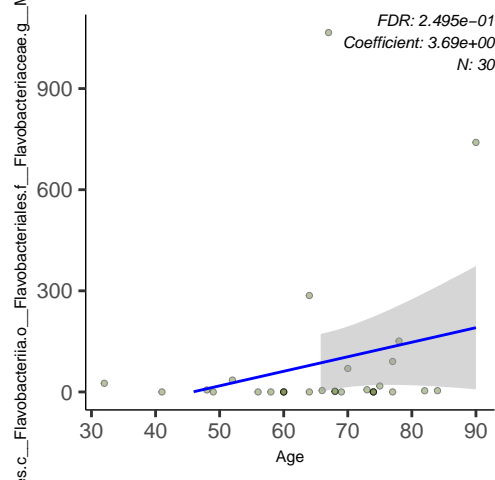

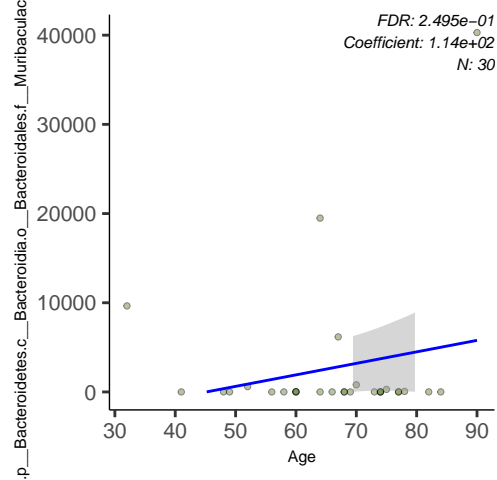

Supplement: s1 [file s1]
