# Supplementary material for: Metatranscriptome Analysis of Nasopharyngeal Swabs across the Varying Severity of COVID-19 Disease Demonstrated Unprecedented Species Diversity
Source: MDPI journal article supplement (doi:10.3390/microorganisms11071804), 2023-07-14

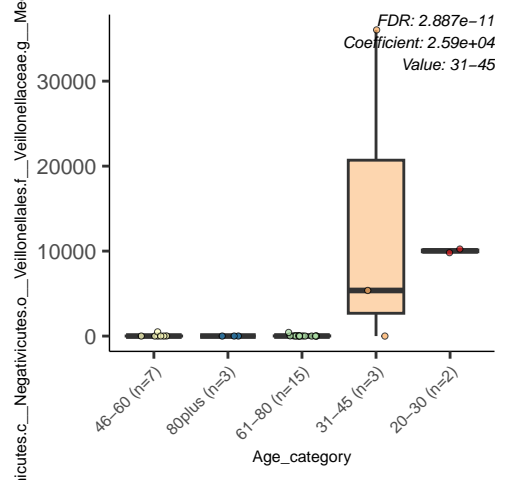

psilonproteobacteria.o\_\_Campylobacterales.f\_\_Campylobacteraceae

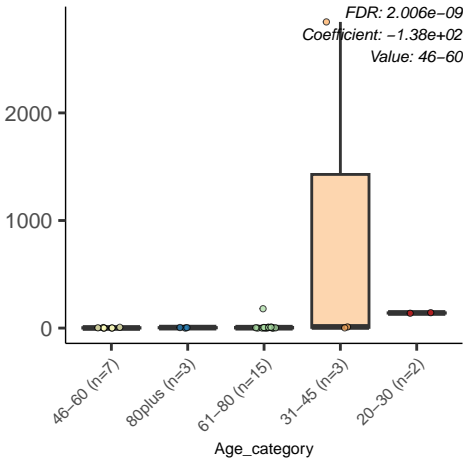

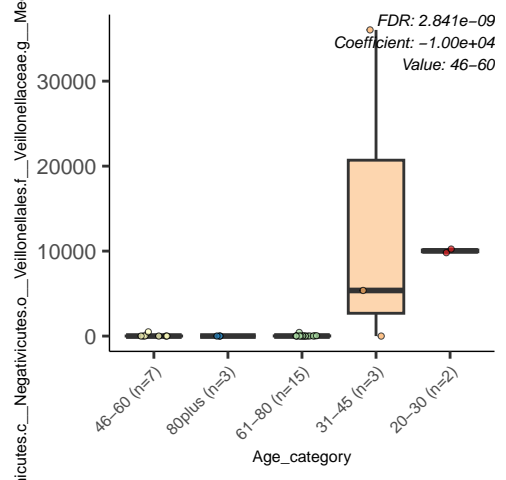

FDR:  $9.721\text{e-}09$   
Coefficient:  $-3.20\text{e}+03$   
Value: 46-60

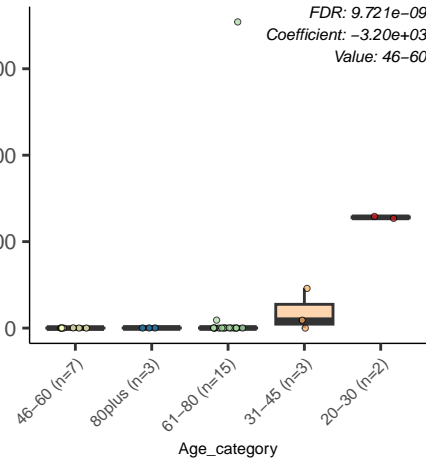

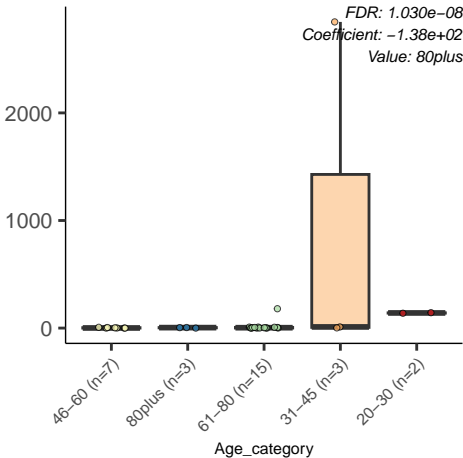

psilonproteobacteria.o\_\_Campylobacterales.f\_\_Campylobacteraceae

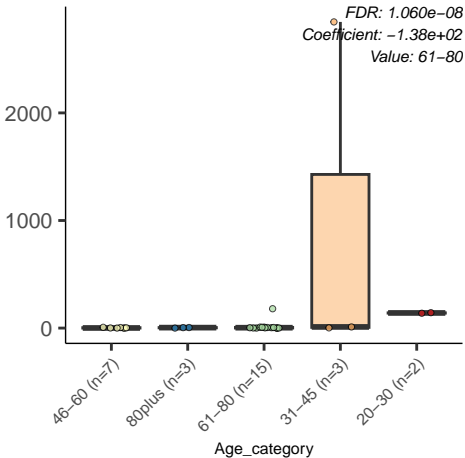

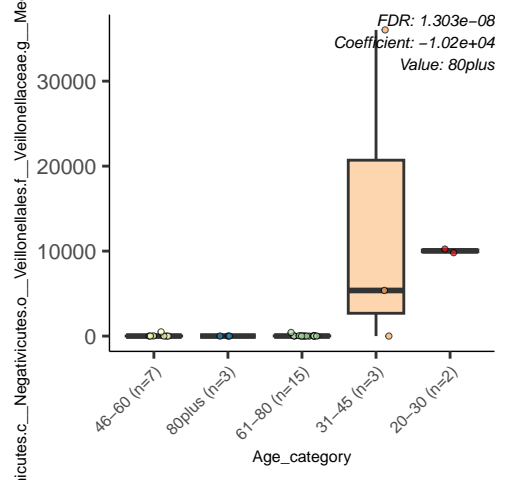

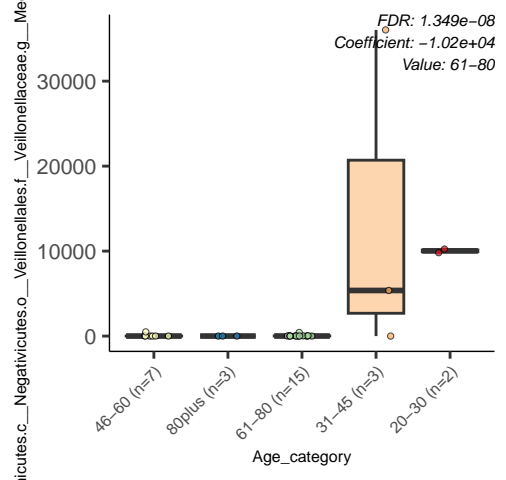



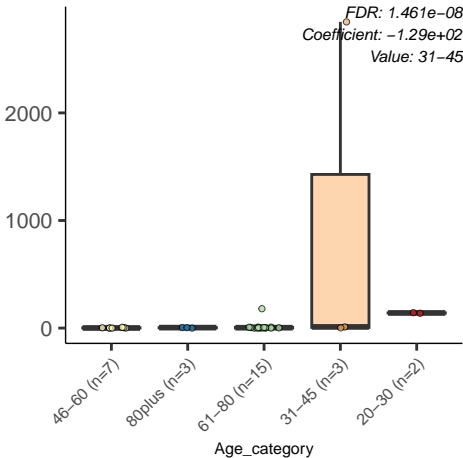

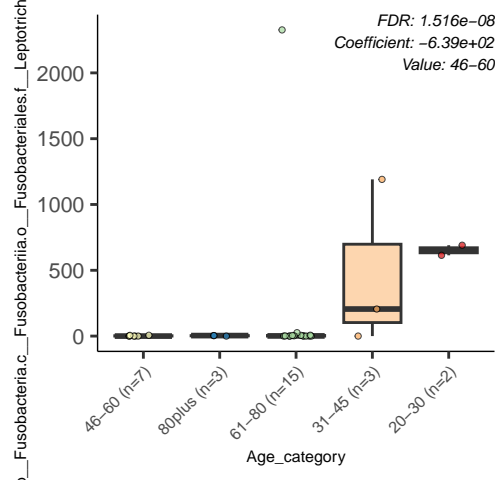

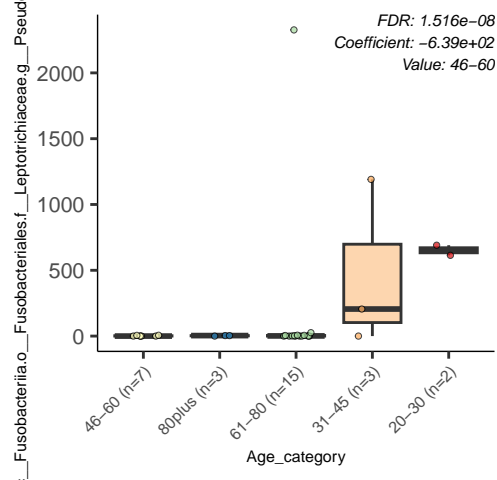

bacteria.c\_\_Fusobacteriia.o\_\_Fusobacteriales.f\_\_Leptotrichiaceae.g\_\_

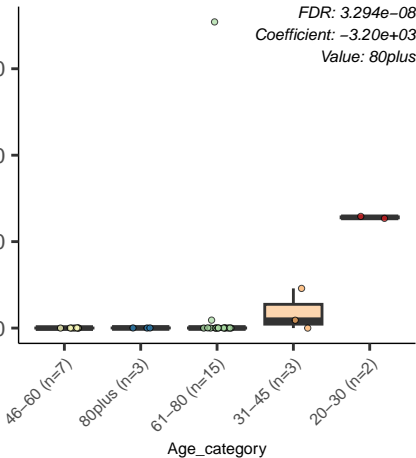

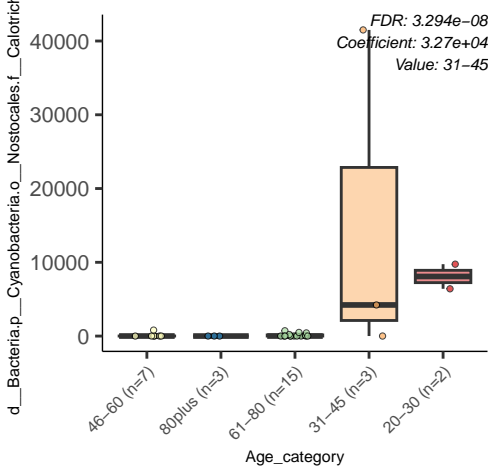

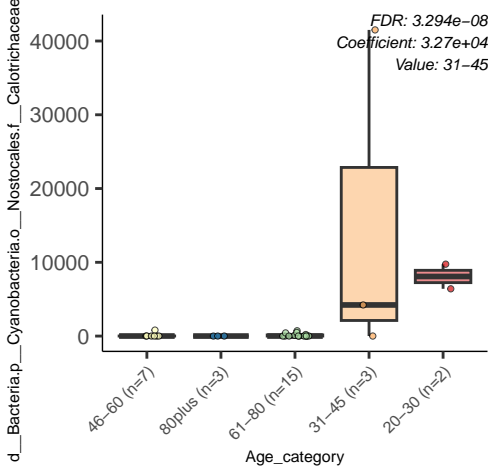

a.p\_\_Cyanobacteria.o\_\_Nostocales.f\_\_Calotrichaceae.g\_\_Calothrix.

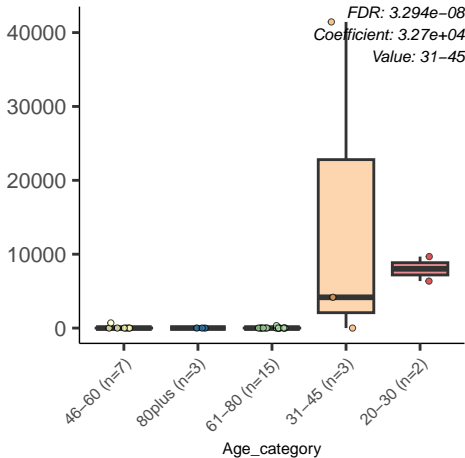

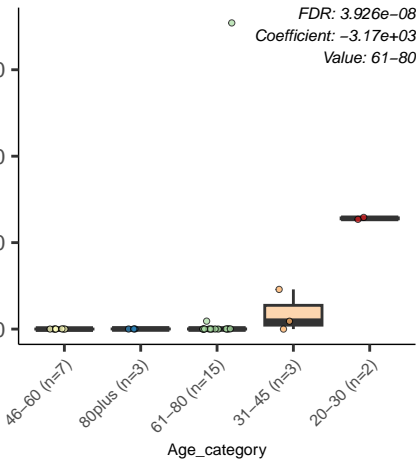



Actinomycetia.o\_\_Corynebacteriales.f\_\_Corynebacteriaceae.g

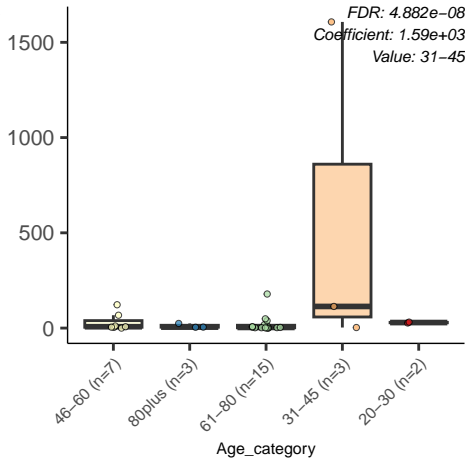

irmicutes.c\_\_Negativicutes.o\_\_Veillonellales.f\_\_Veillonellaceae.g\_\_L

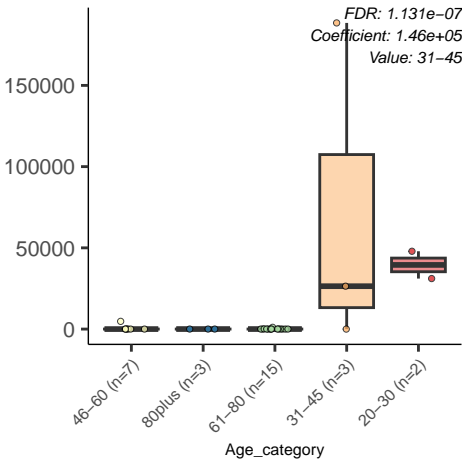

o\_Fusobacteria.c\_Fusobacteriia.o\_Fusobacteriales.f\_Leptotrich

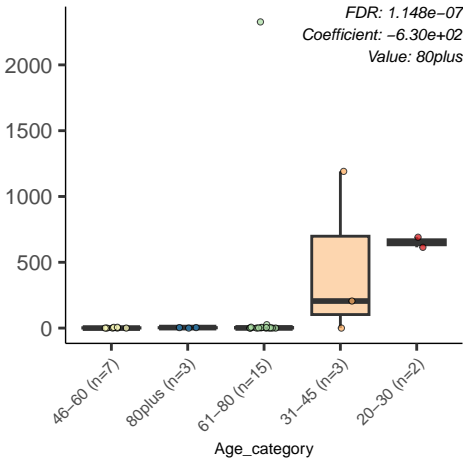

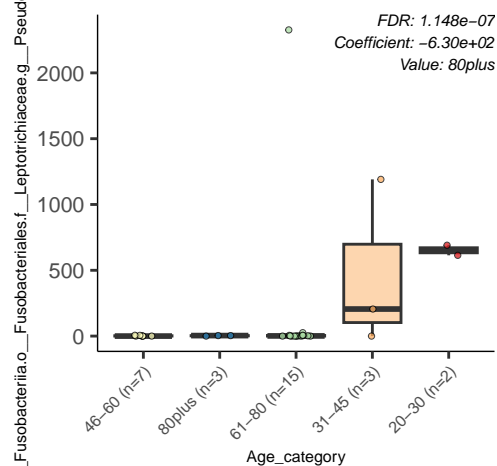

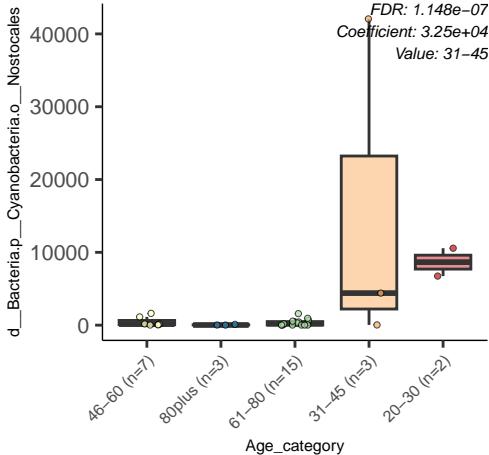

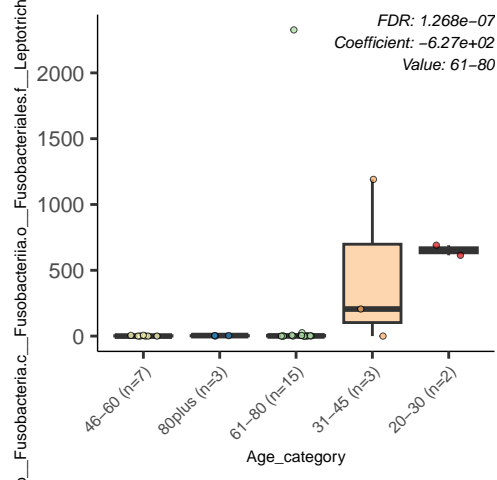

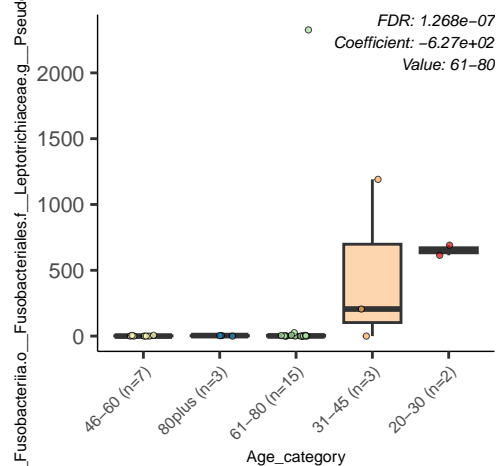

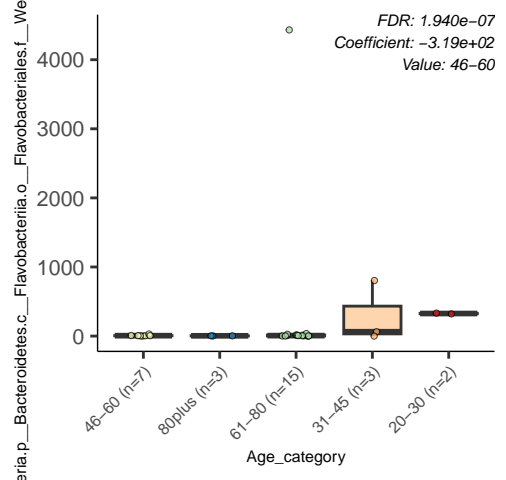



cteroidetes.c\_\_Bacteroidia.o\_\_Bacteroidales.f\_\_Bacteroidaceae.g

FDR:  $1.940 \times 10^{-7}$   
Coefficient:  $-3.33 \times 10^3$   
Value:  $-16.60$

3000

2000

1000

0

46-60 (n=7)

80plus (n=3)

61-80 (n=15)

31-45 (n=3)

20-30 (n=2)

Age\_category

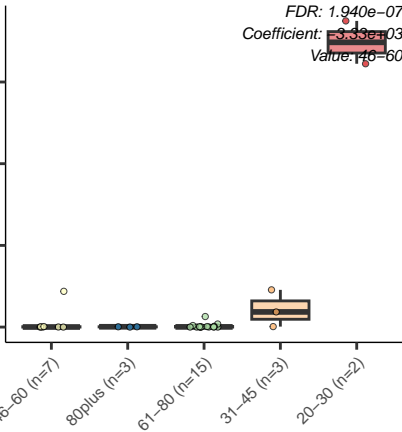

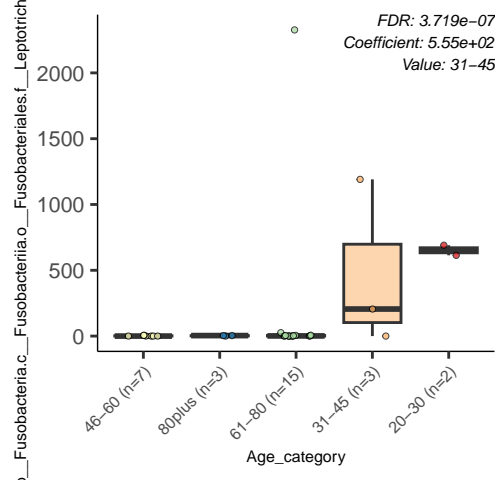

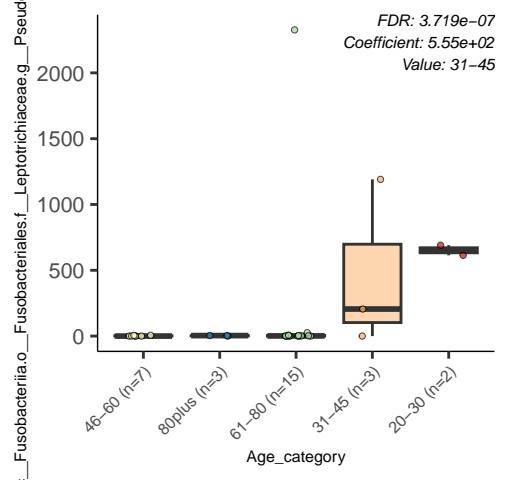

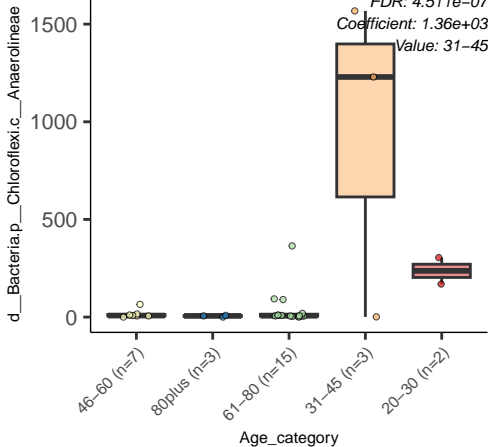

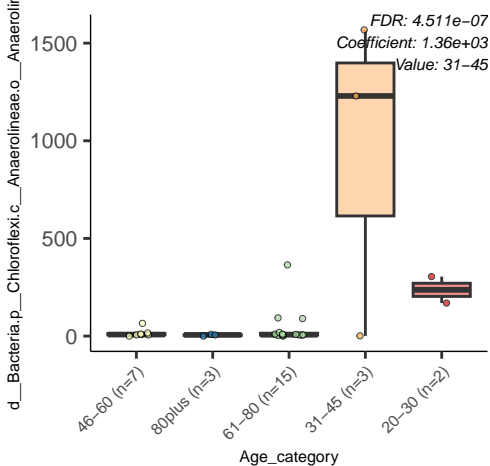

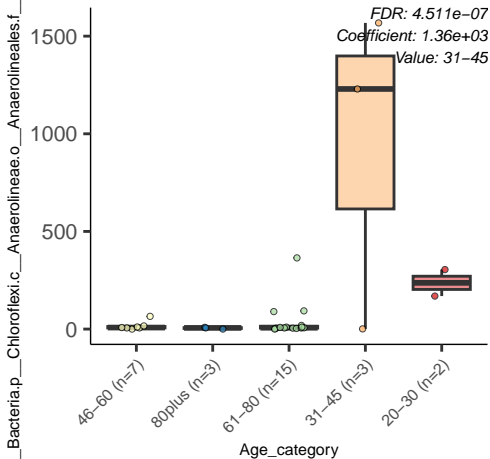

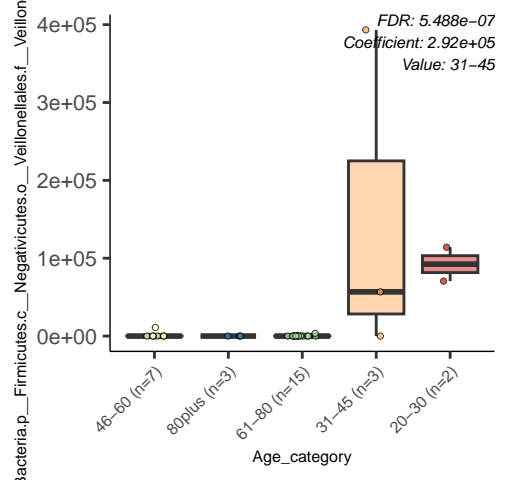

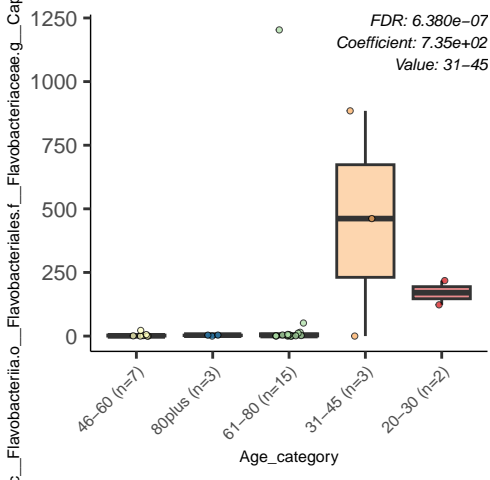



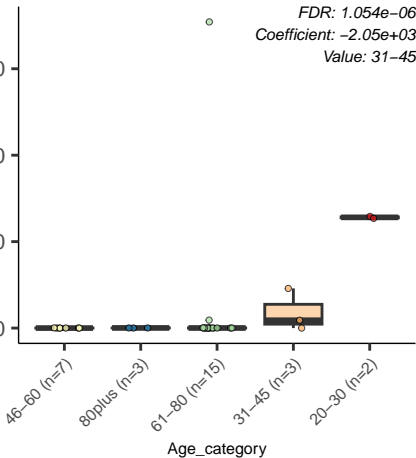

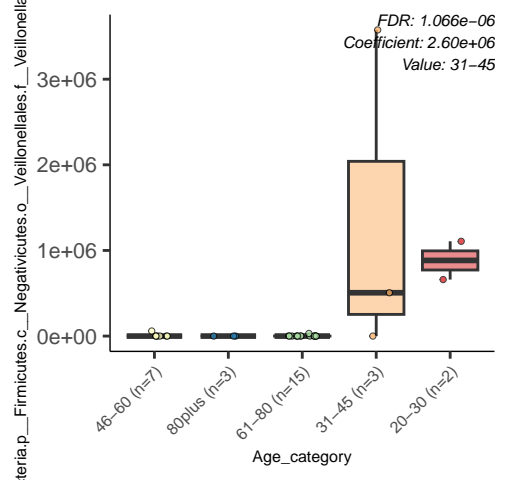

roidetes.c\_\_Cytophagia.o\_\_Cytophagales.f\_\_Cytophagaceae.g\_\_Sp

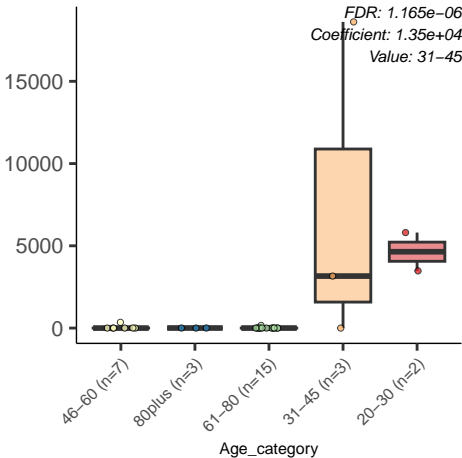

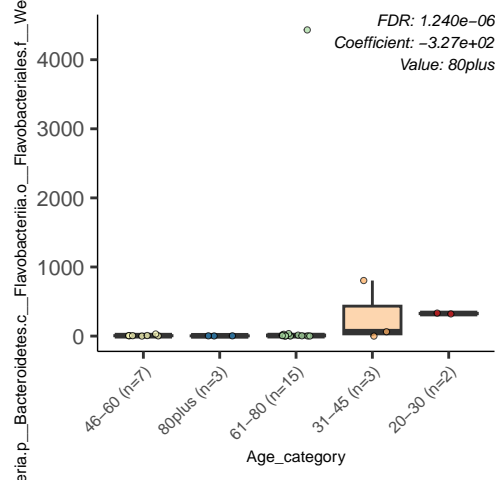

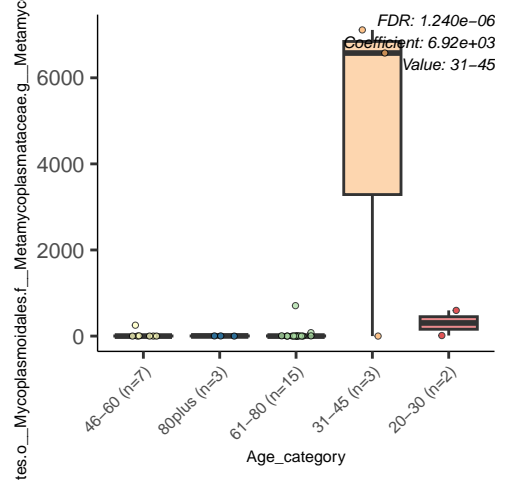

icutes.c\_\_Negativicutes.o\_\_Veillonellales.f\_\_Veillonellaceae.g\_\_Meg

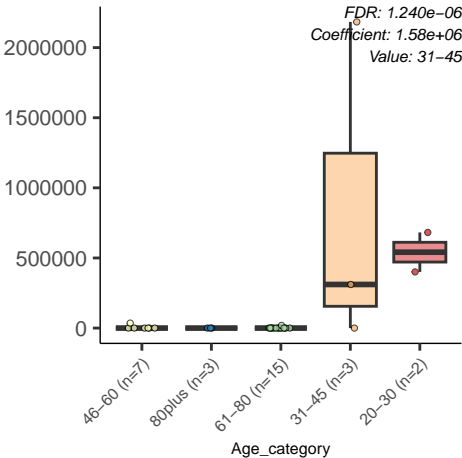

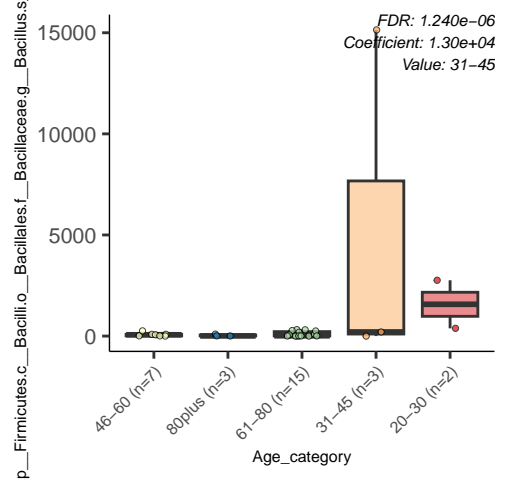

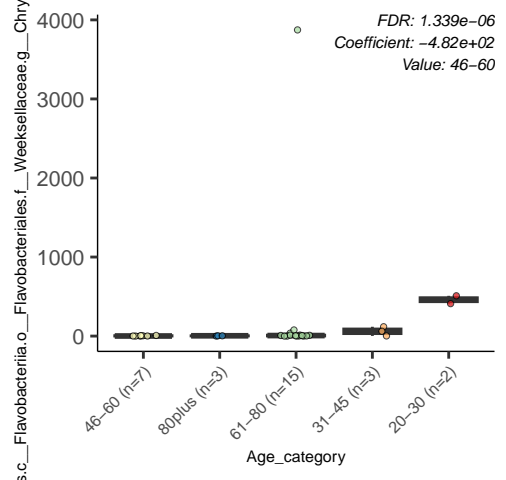



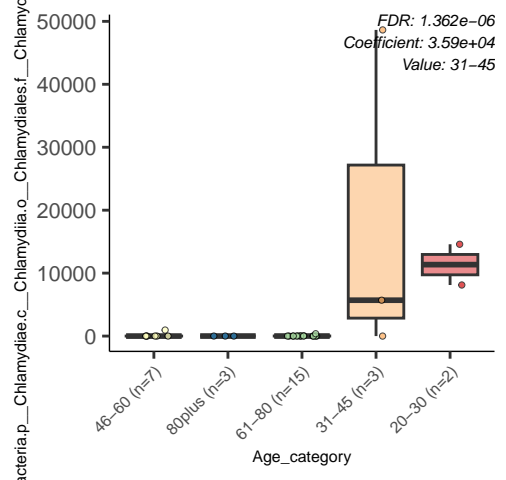

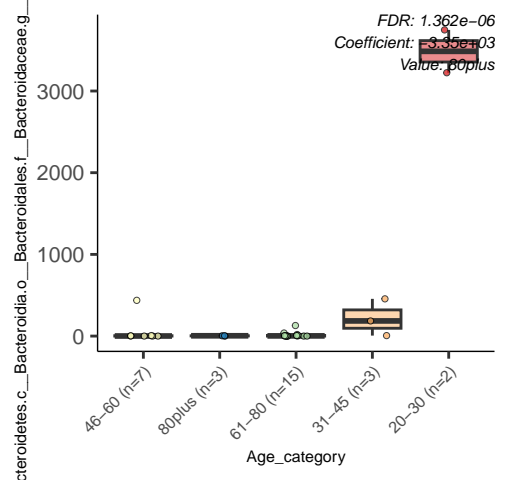

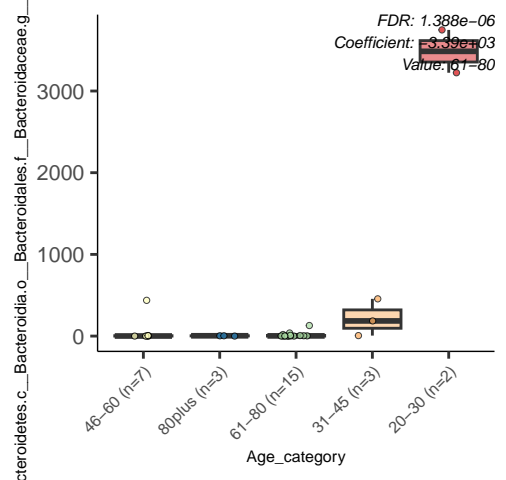

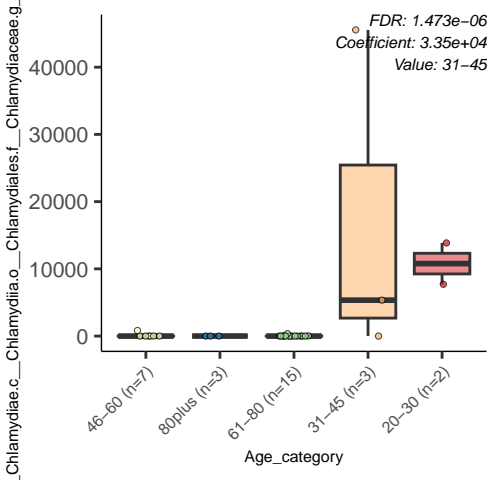

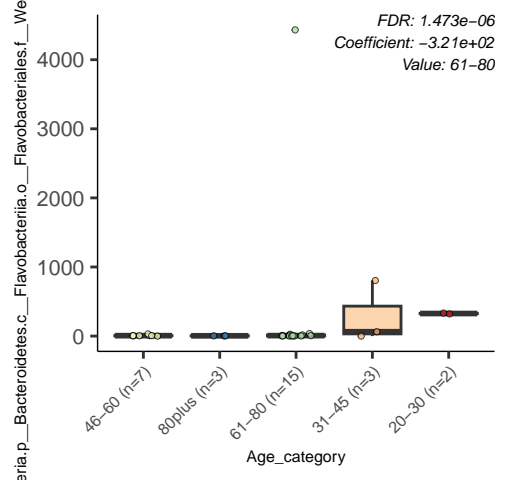

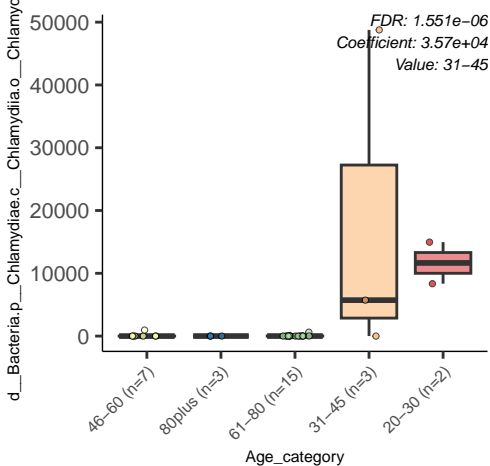

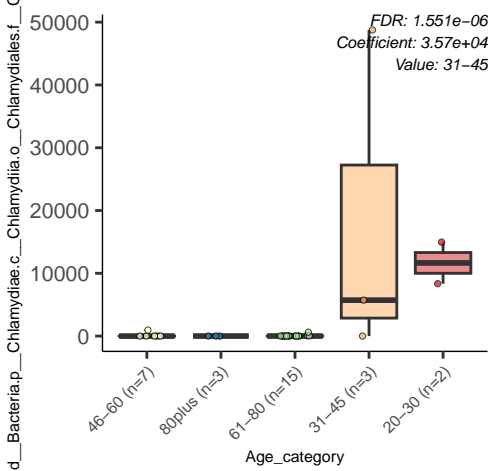

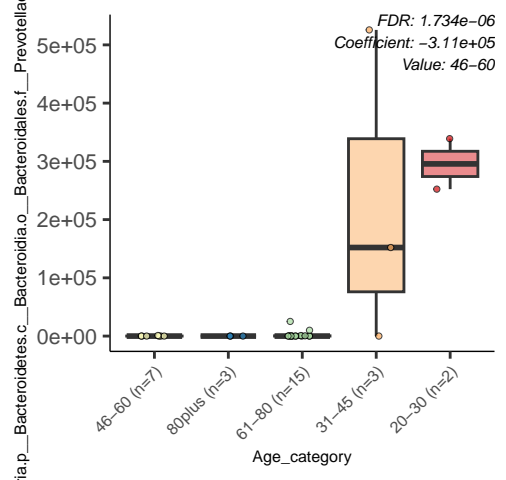



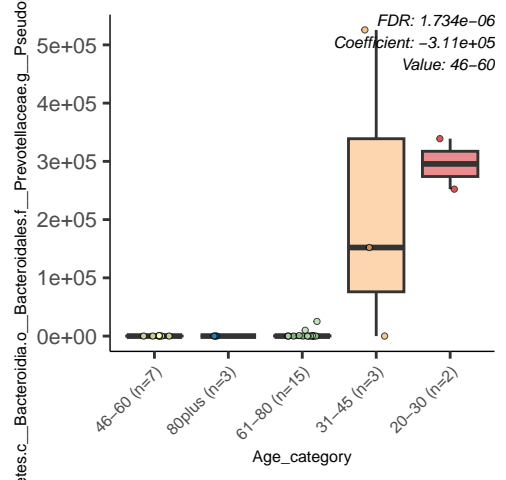

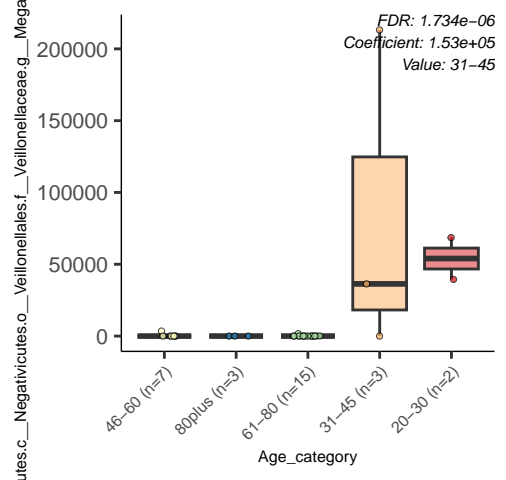

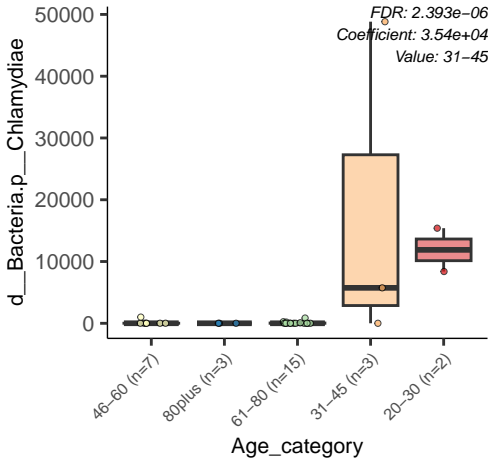

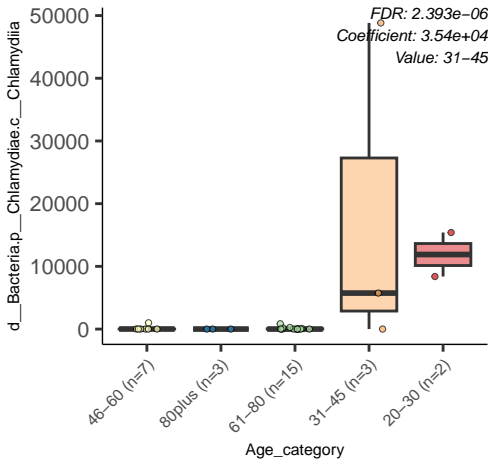

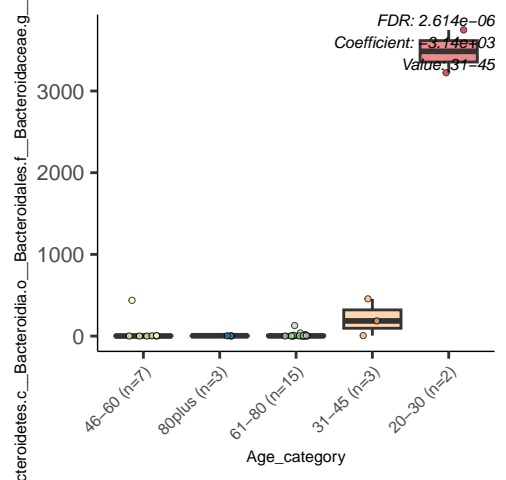

roidetes.c\_\_Bacteroidia.o\_\_Bacteroidales.f\_\_Bacteroidaceae.g\_\_Ph

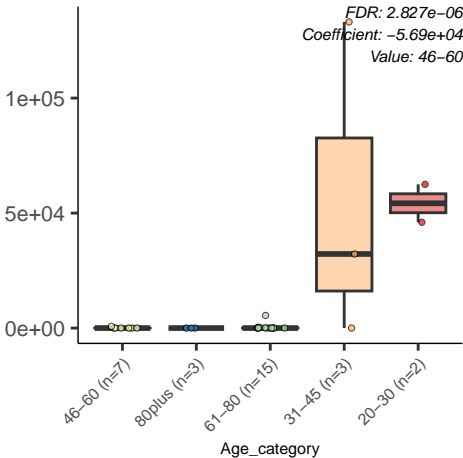

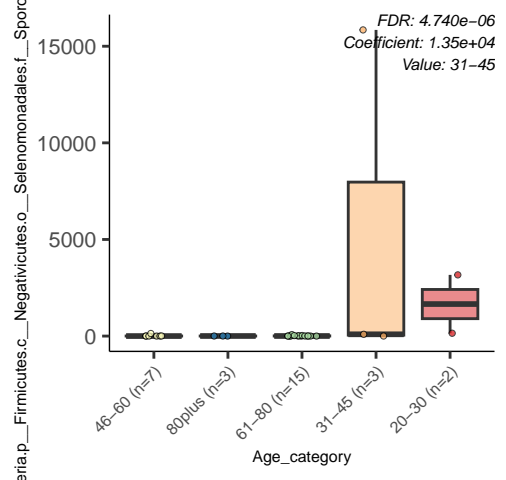

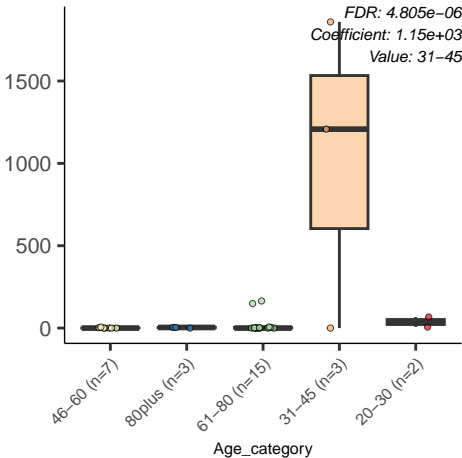



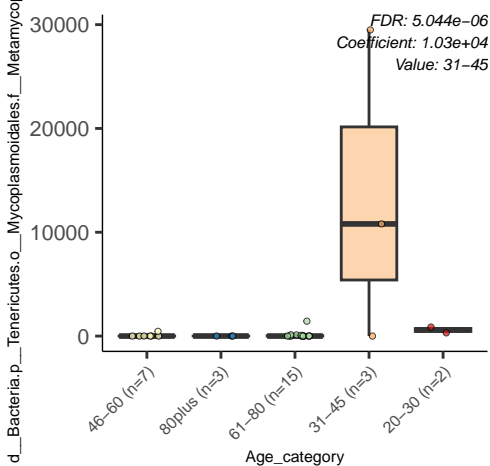

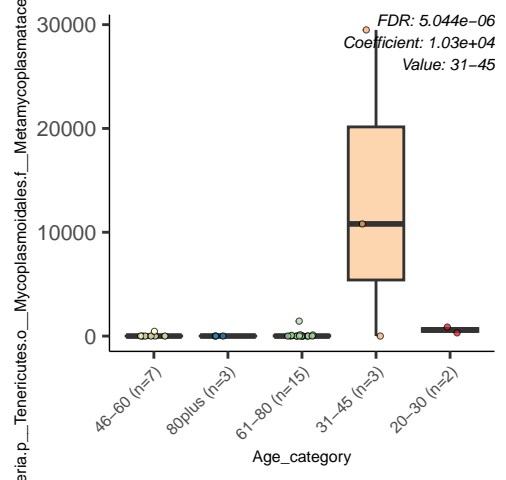

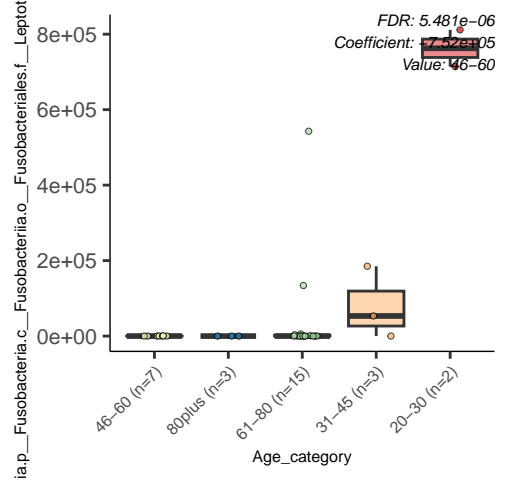

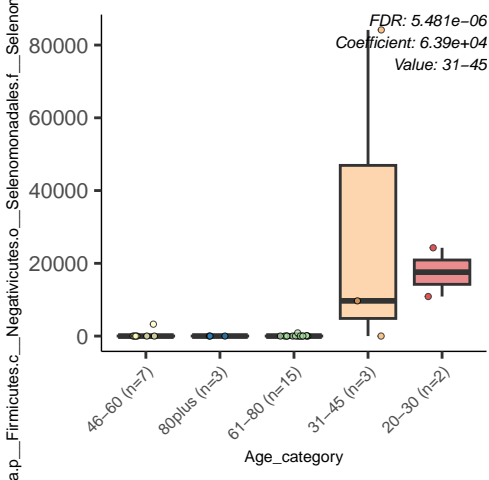

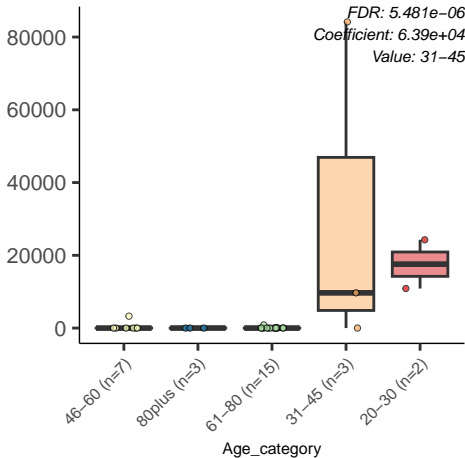

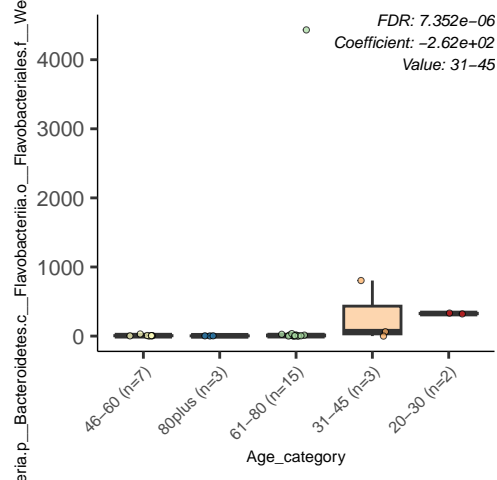

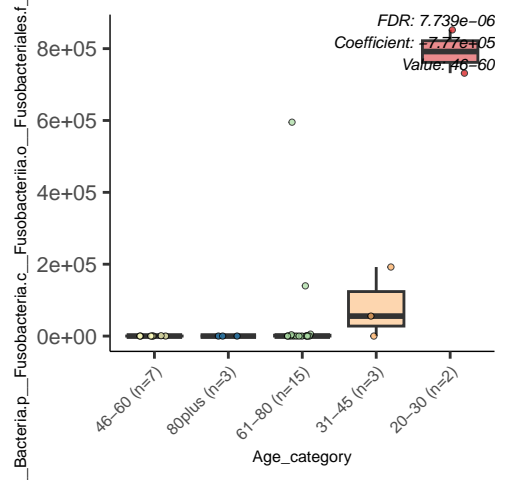

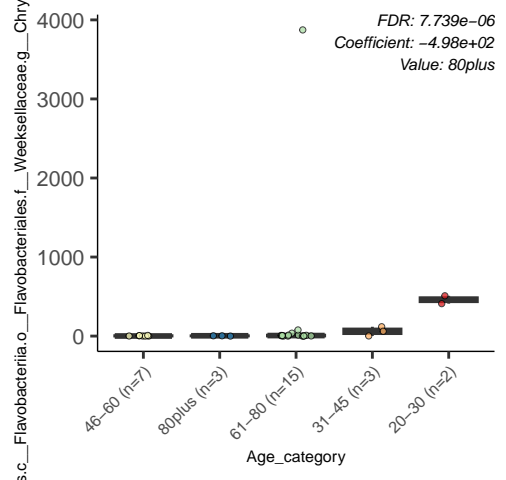



acteria.p\_\_Firmicutes.c\_\_Clostridia.o\_\_Eubacteriales.f\_\_Oscillospirac

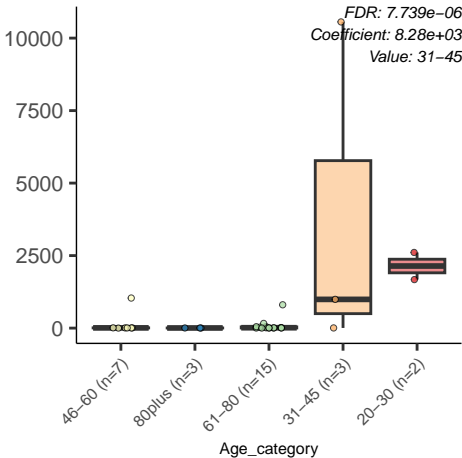

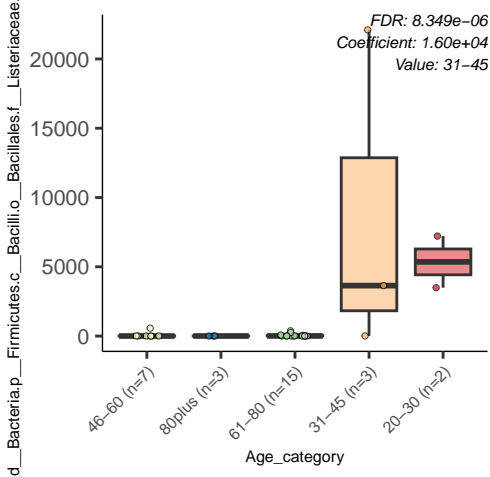

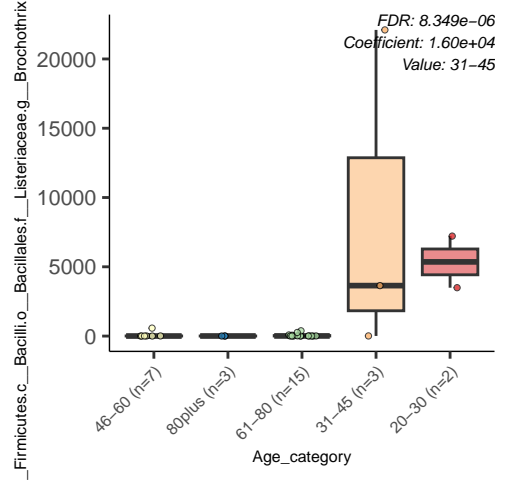

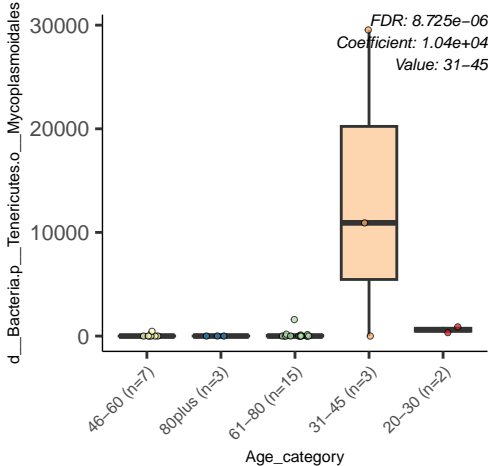

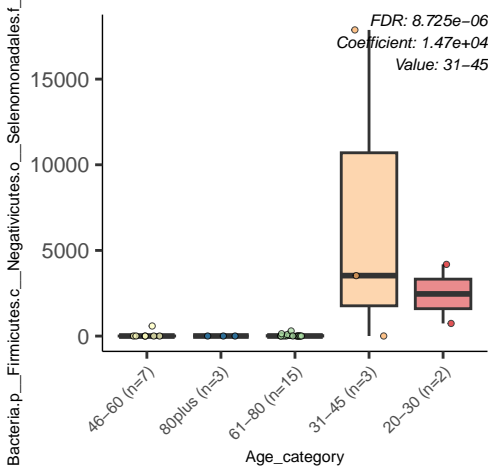

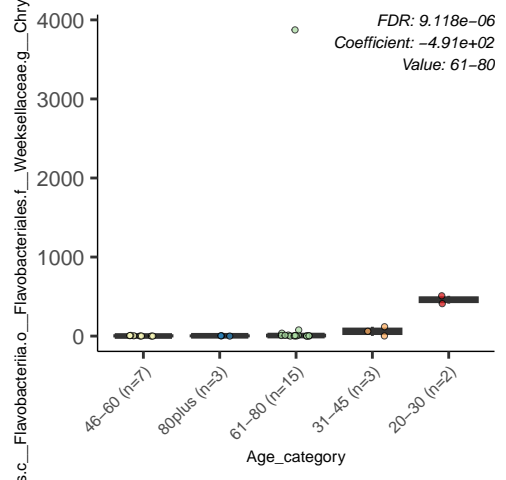

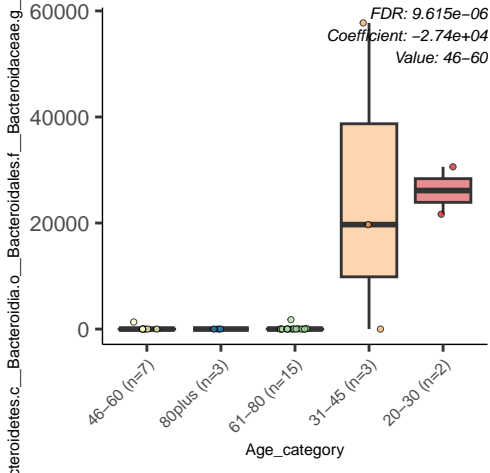

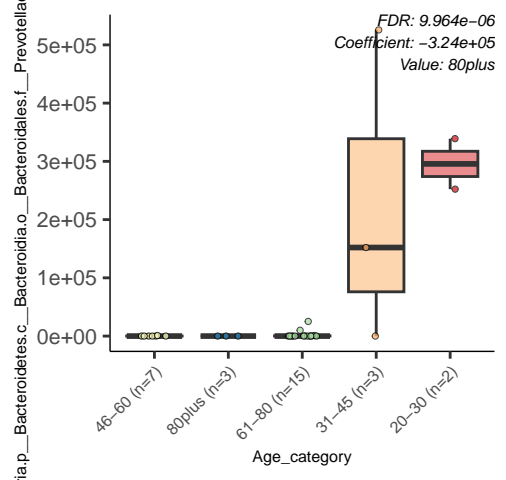



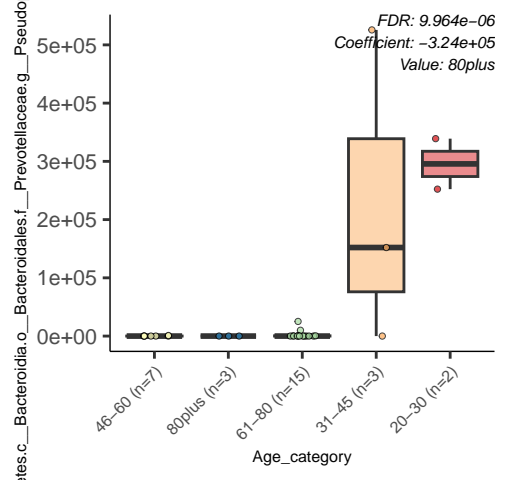

bacteria.c\_Actinomycetia.o\_Actinomycetales.f\_Actinomycetaceae

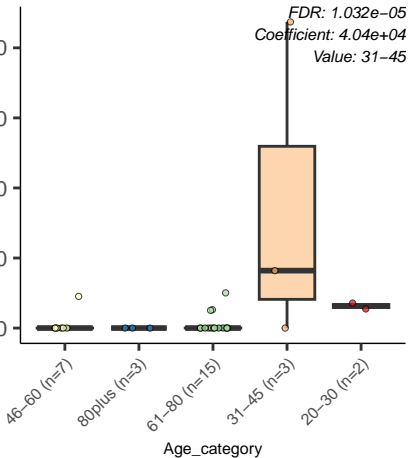

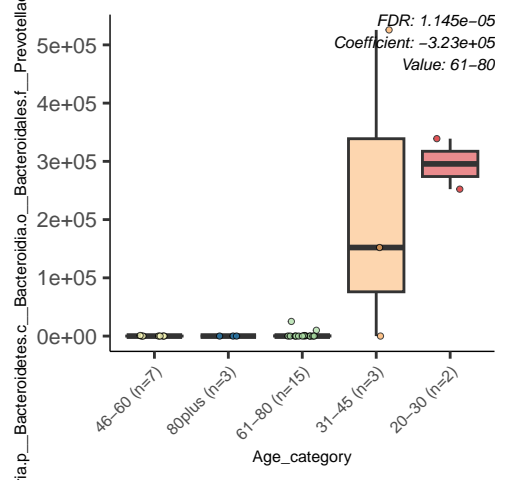

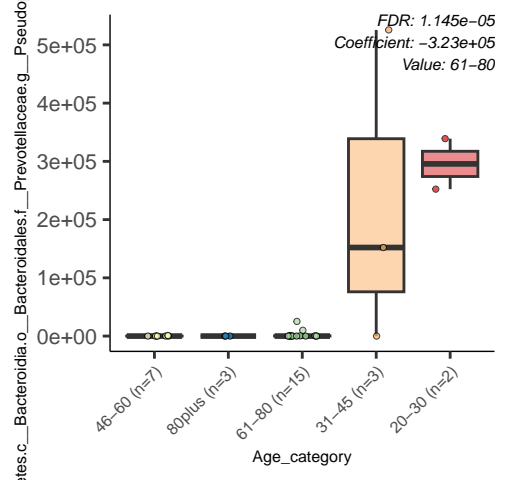

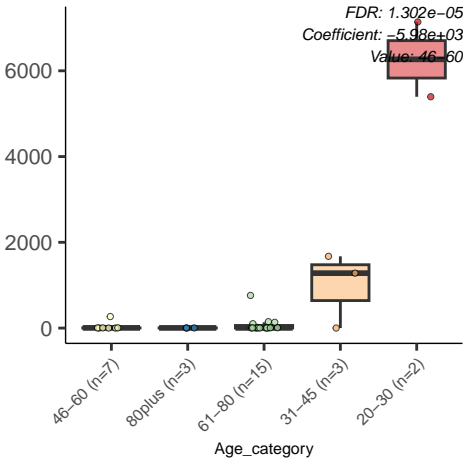

roidetes.c\_\_Bacteroidia.o\_\_Bacteroidales.f\_\_Bacteroidaceae.g\_\_Ph

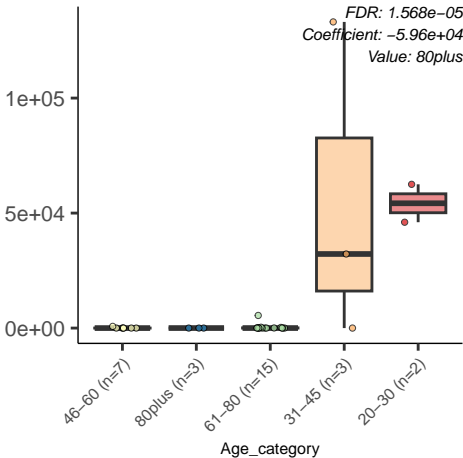

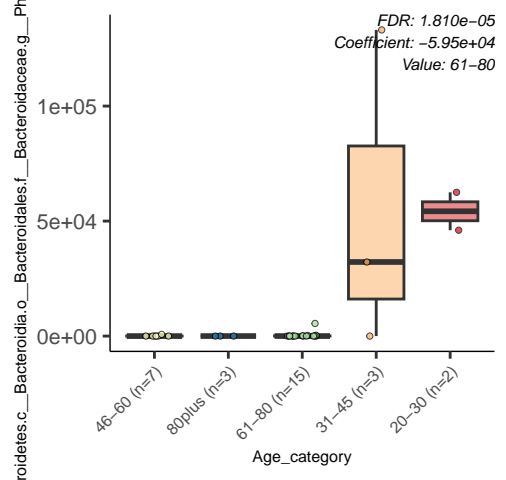

d\_\_Bacteria.p\_\_Nitrospirae.c\_\_Nitrospira

FDR: 1.865e-05  
Coefficient: 1.54e+03  
Value: 31-45

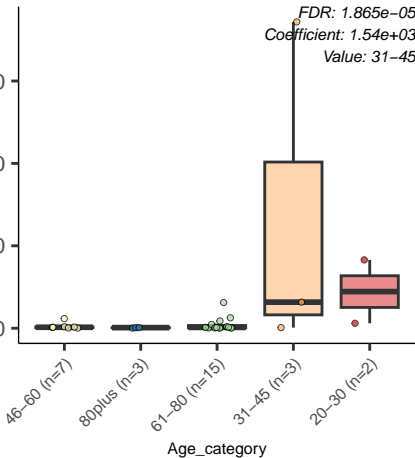



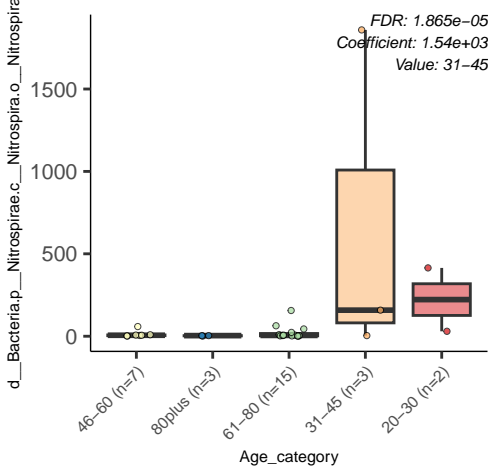

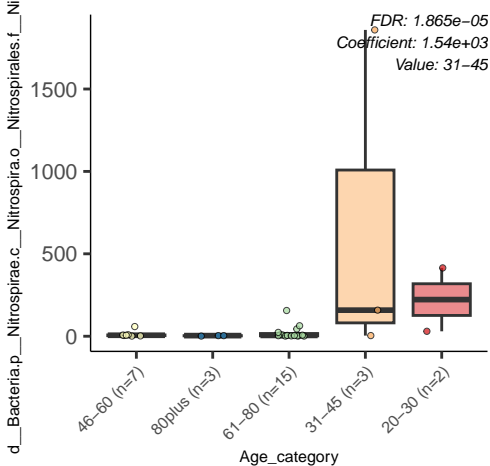

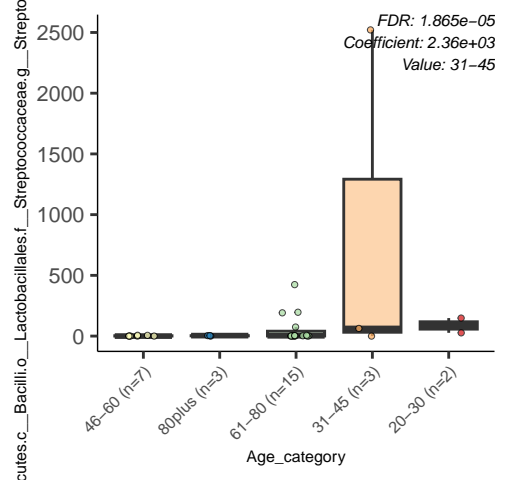

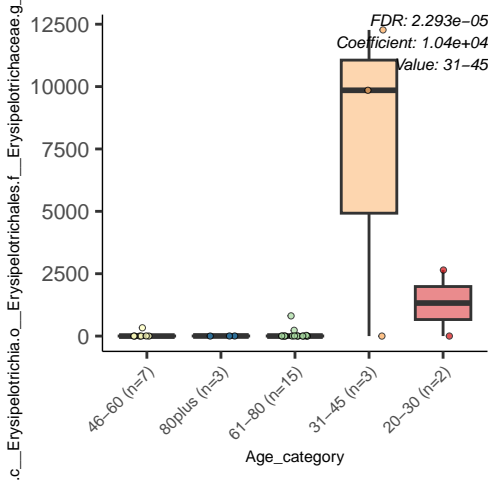

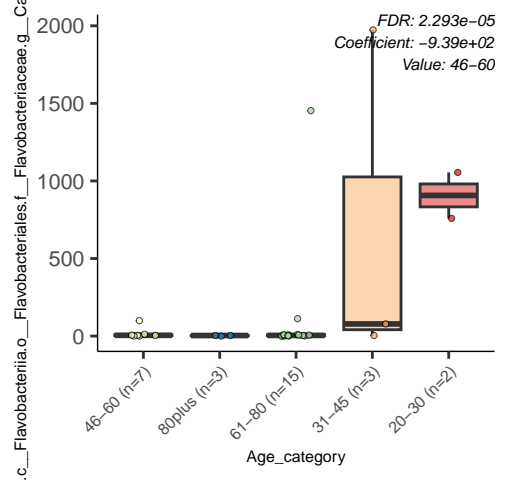

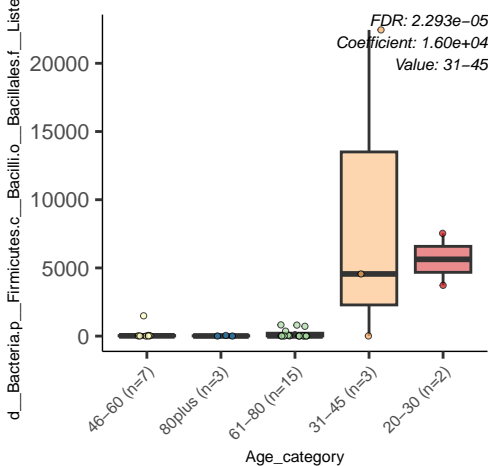

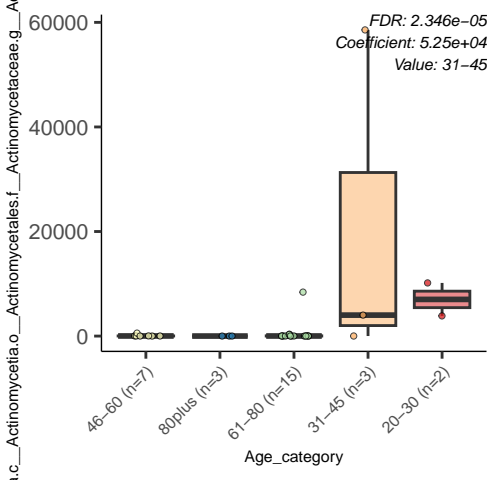

d\_Bacteria.p\_Fusobacteria

0e+00

5e+05

1e+06

FDR: 2.659e-05

Coefficient: -1.03e+06

Value: 46-60

46-60 (n=7)

80plus (n=3)

61-80 (n=15)

31-45 (n=3)

20-30 (n=2)

Age\_category

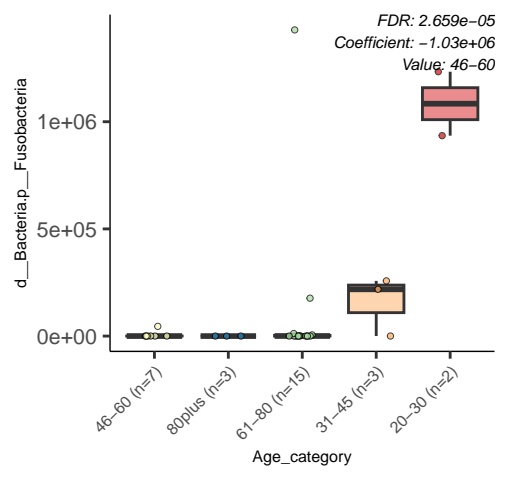



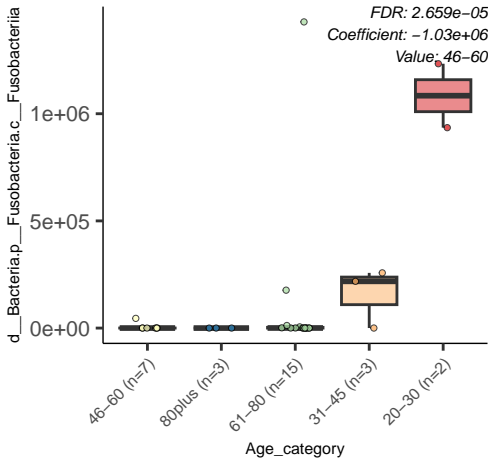

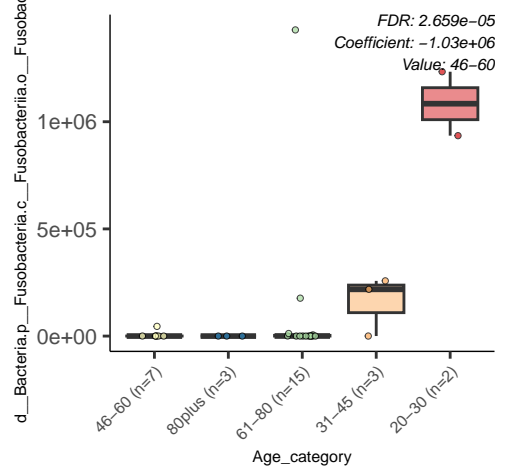

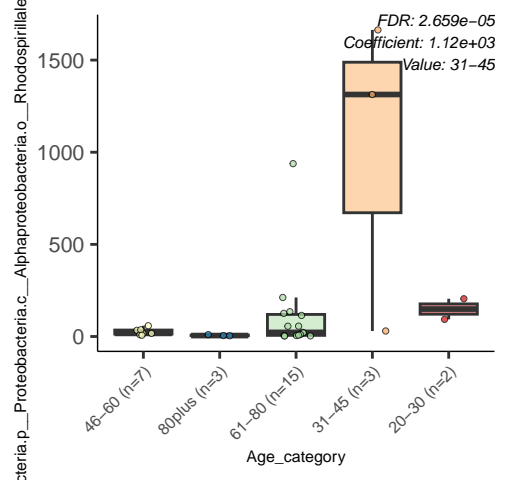

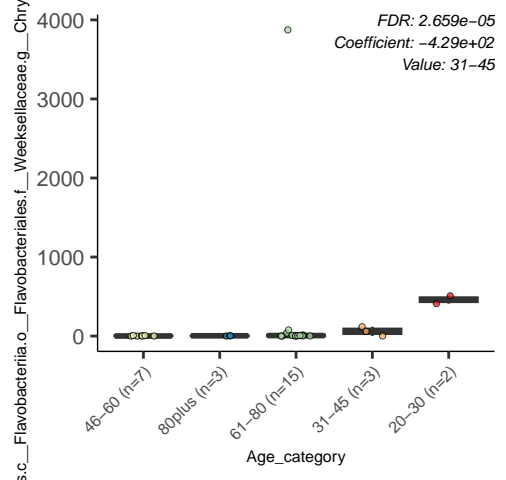

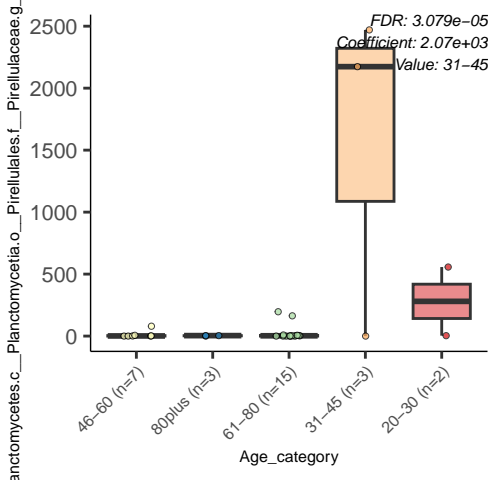

acteria.p\_\_Planctomycetes.c\_\_Planctomycetia.o\_\_Pirellulales.f\_\_Pir

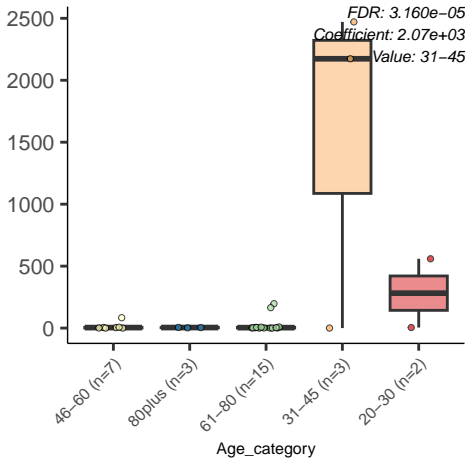

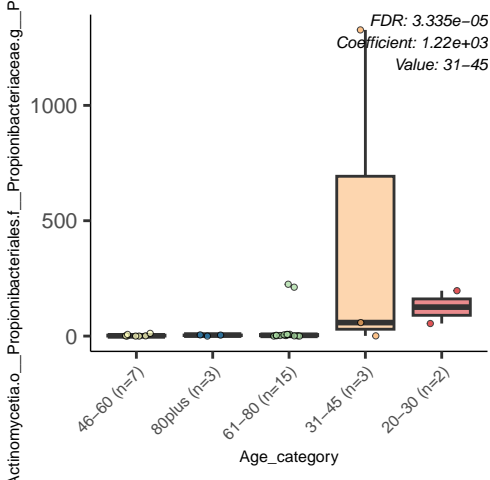

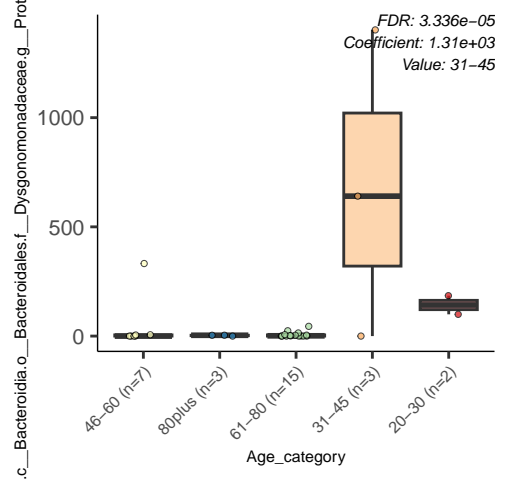



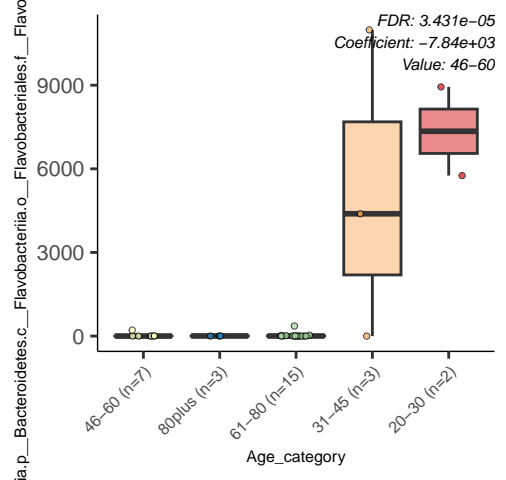

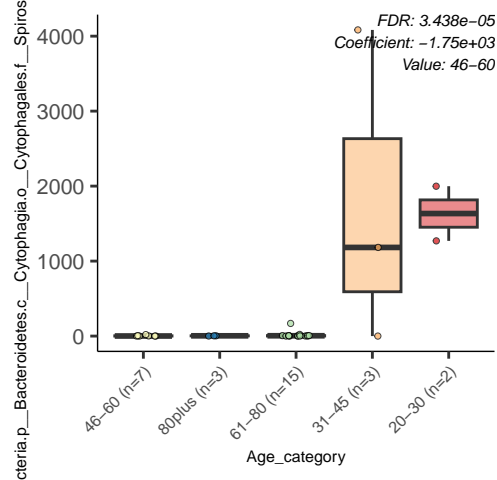

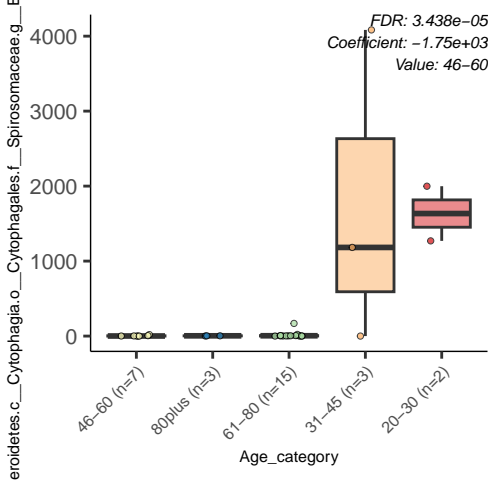

d\_\_Bacteria.p\_\_Nitrospirae

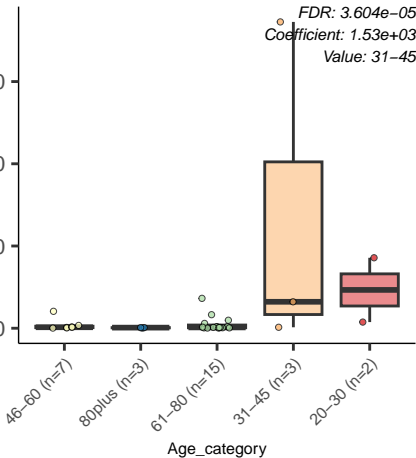

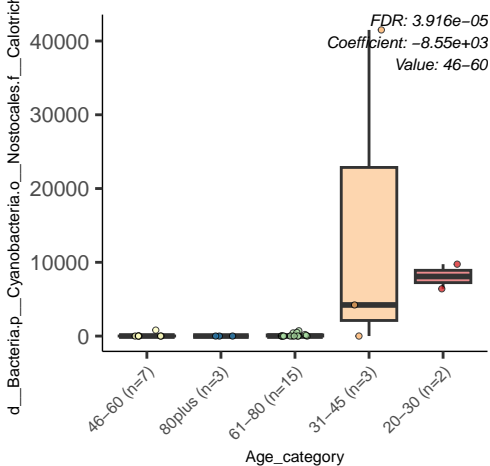

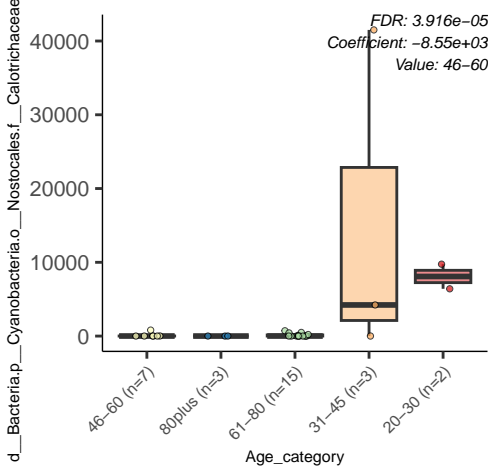

o\_\_Firmicutes.c\_\_Erysipelotrichia.o\_\_Erysipelotrichales.f\_\_Erysipel

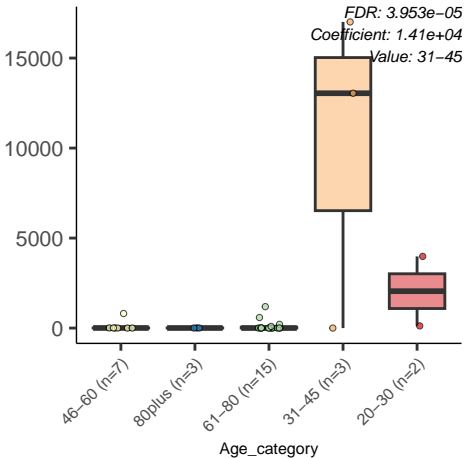

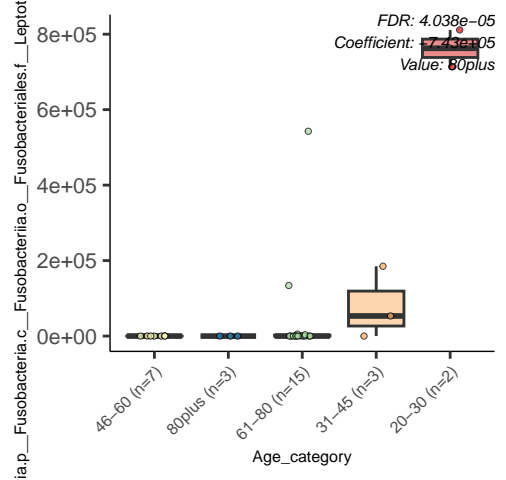



a.p\_\_Cyanobacteria.o\_\_Nostocales.f\_\_Calotrichaceae.g\_\_Calothrix.

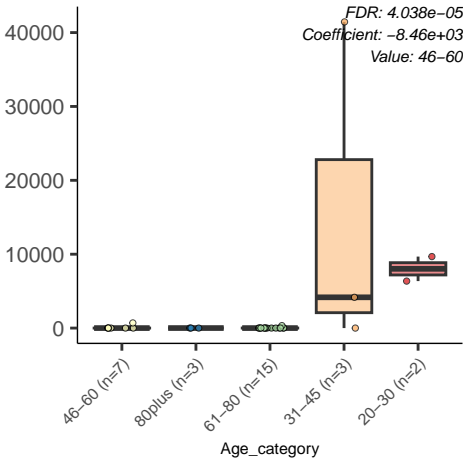

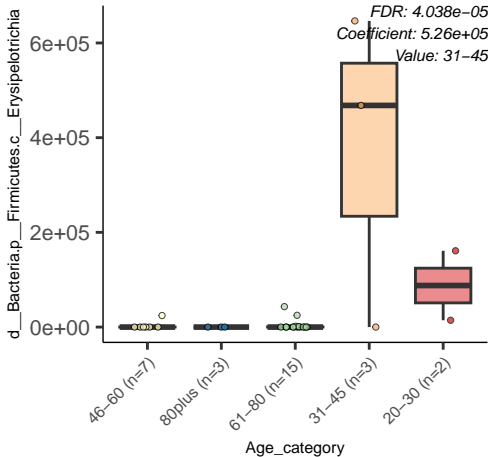

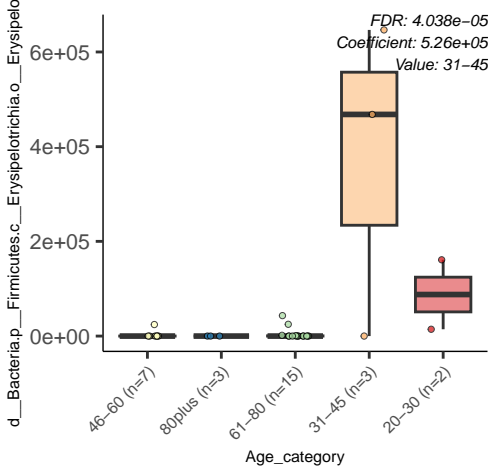

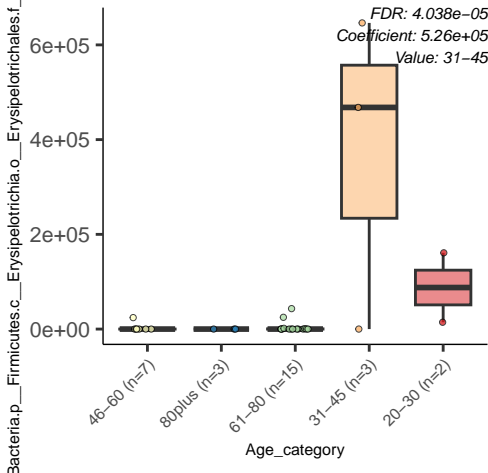

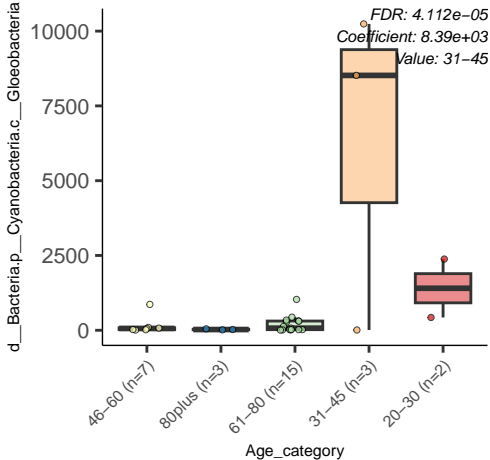

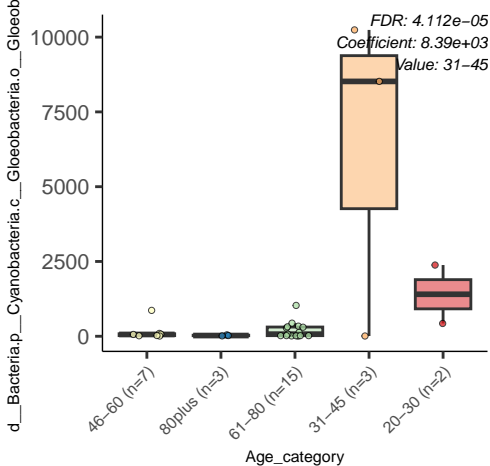

Bacteria.p\_\_Cyanobacteria.c\_\_Gloeobacteria.o\_\_Gloeobacterales.f\_\_

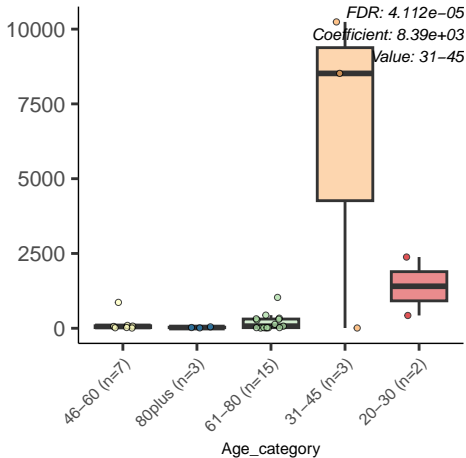

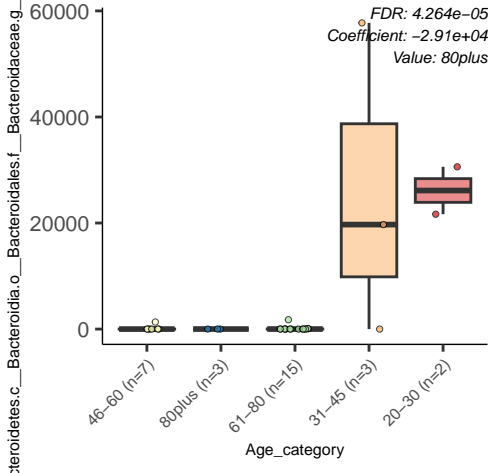



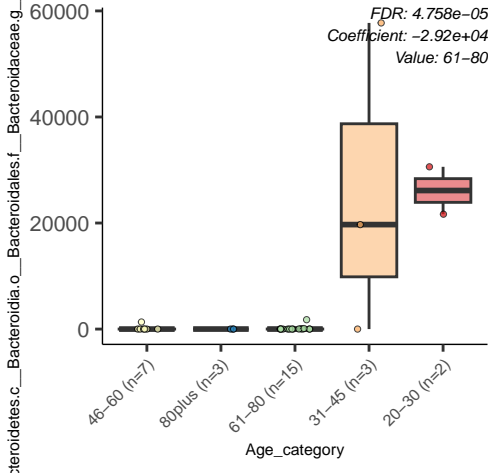

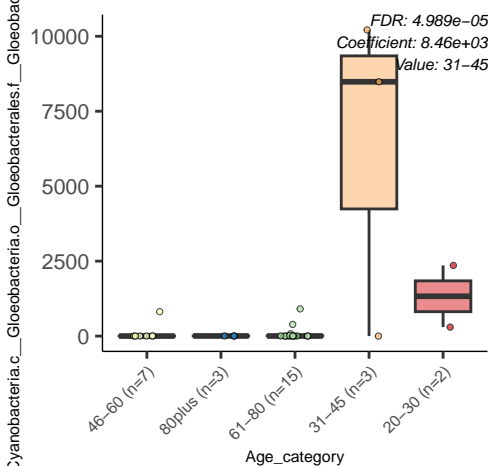

Ant  
Gloeobacteria.o\_\_Gloeobacterales.f\_\_Gloeobacteraceae.g\_\_Ant

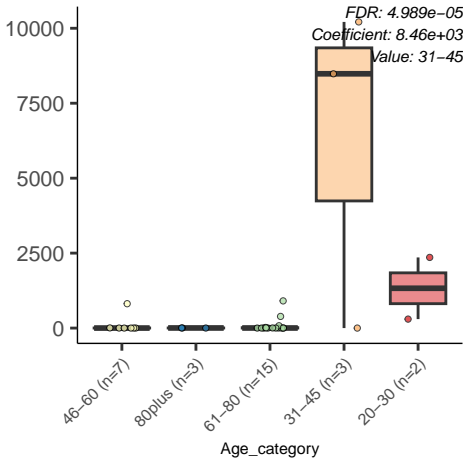

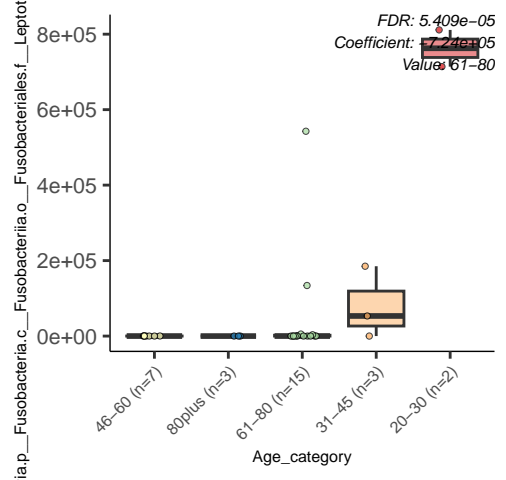

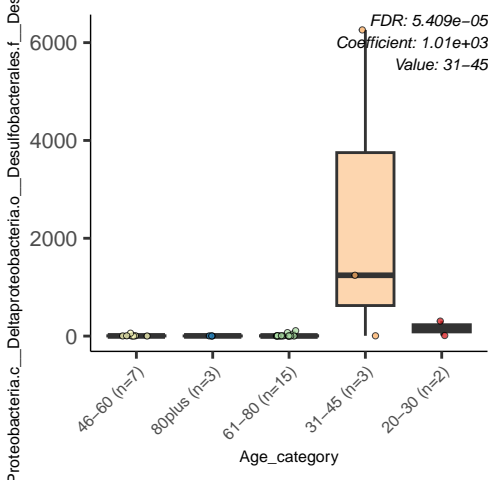

Neisseriaceae

FDR: 5.420e-05

Coefficient: 2.14e+03

Value: 31-45

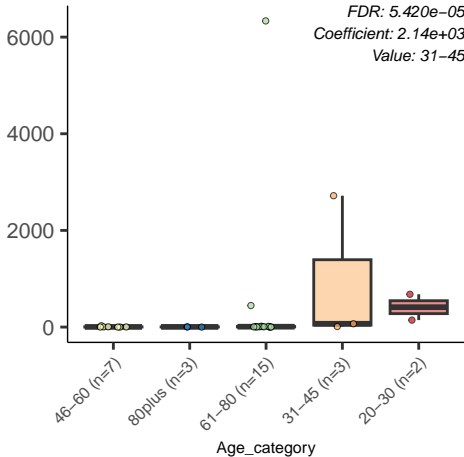

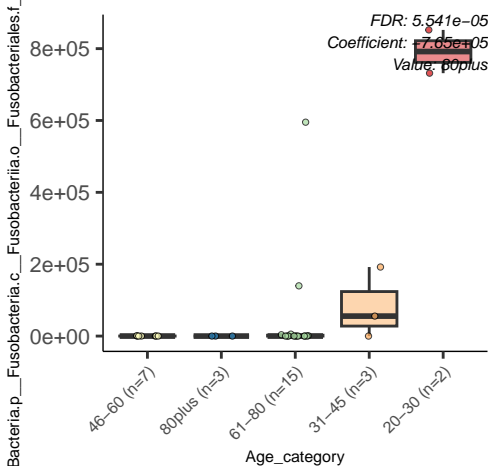

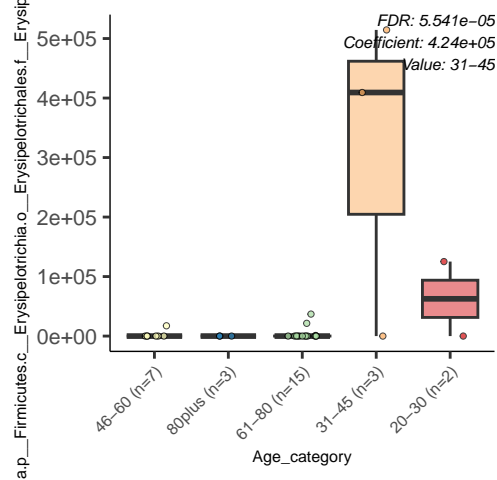



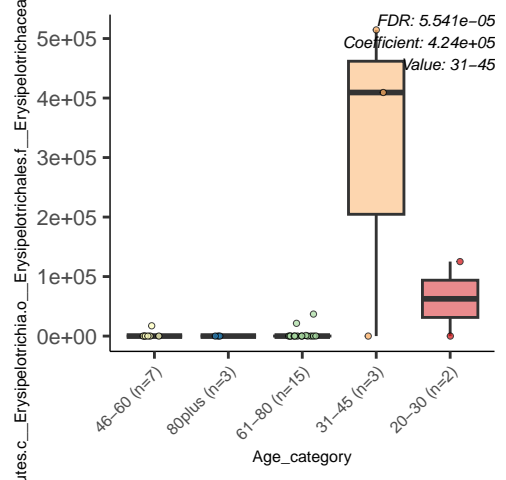

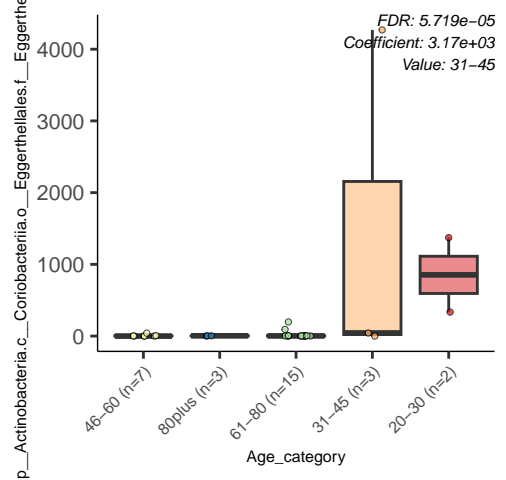

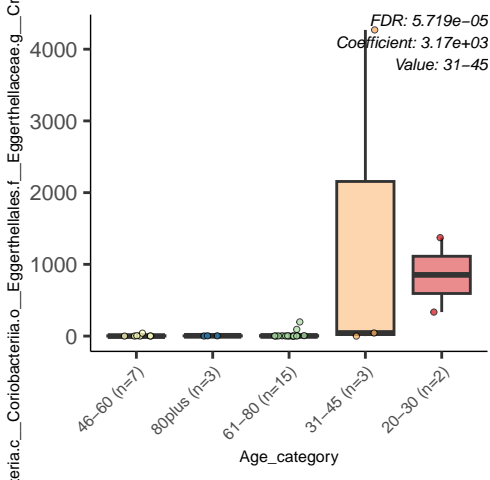

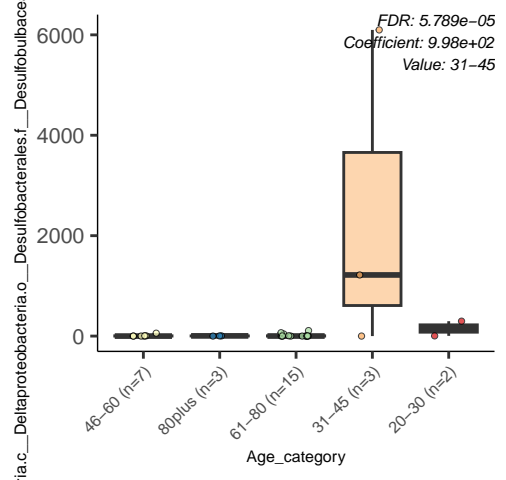

teria.p\_\_Proteobacteria.c\_\_Deltaproteobacteria.o\_\_Desulfobactera

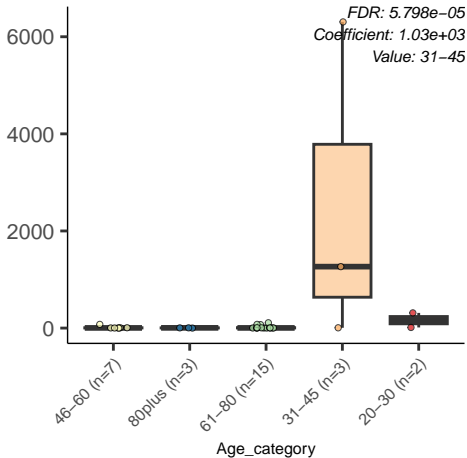

d\_Bacteria.p\_Actinobacteria.c\_Actinomycetia.o\_Micromono

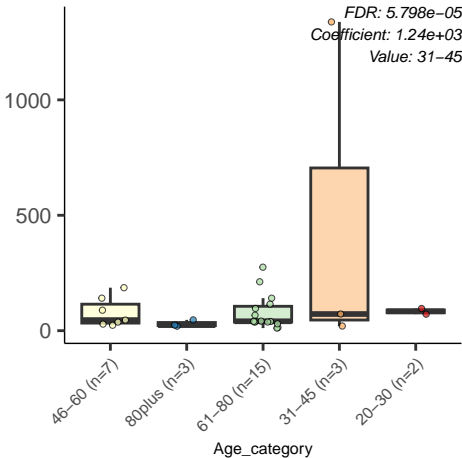

Actinobacteria.p\_Actinobacteria.c\_Actinomycetia.o\_Micromonosporales.f

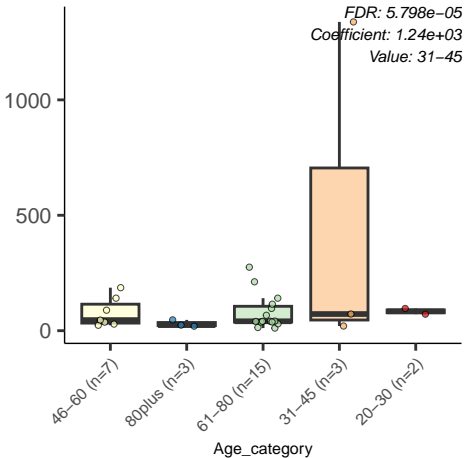

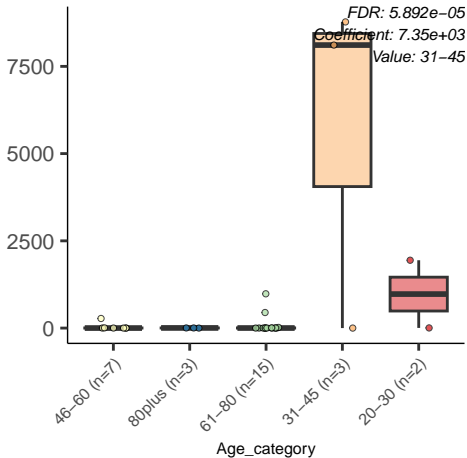



irmicutes.c\_\_Negativicutes.o\_\_Veillonellales.f\_\_Veillonellaceae.g\_\_L

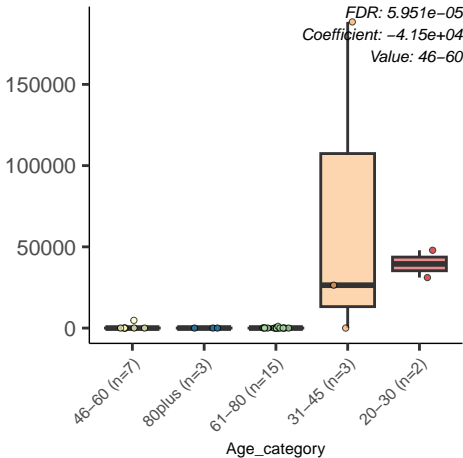

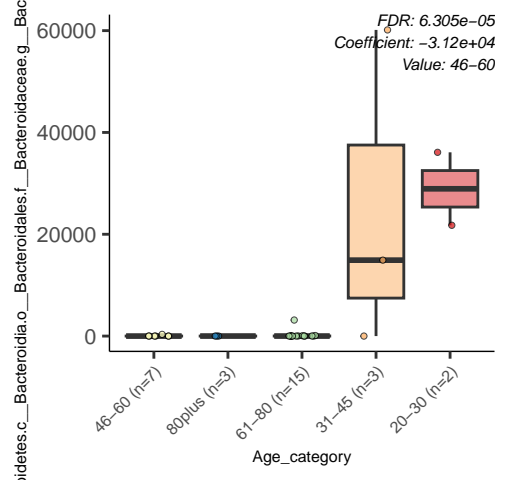

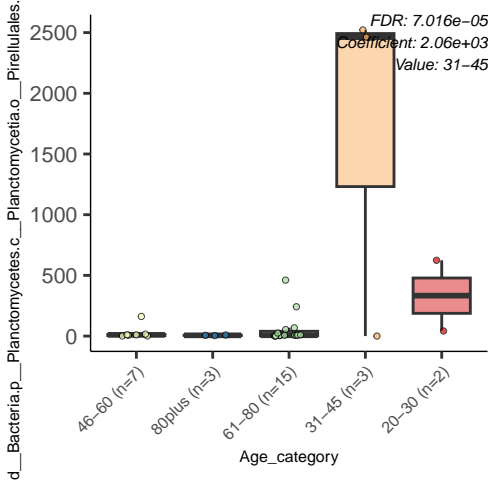

p\_\_Bacteroidetes.c\_\_Bacteroidia.o\_\_Bacteroidales.f\_\_Dysgonom

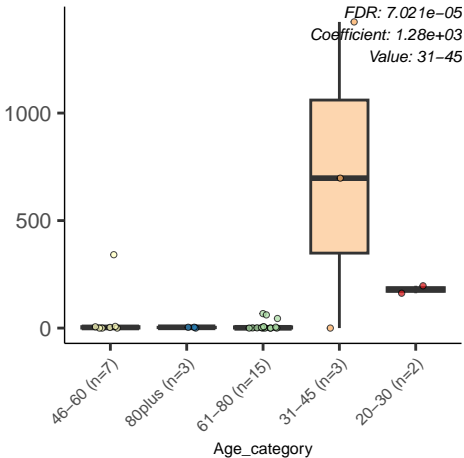

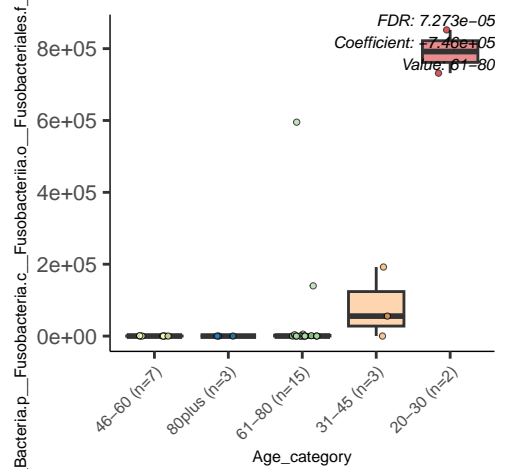

eria.p\_\_Bacteroidetes.c\_\_Bacteroidia.o\_\_Bacteroidales.f\_\_Prevotell

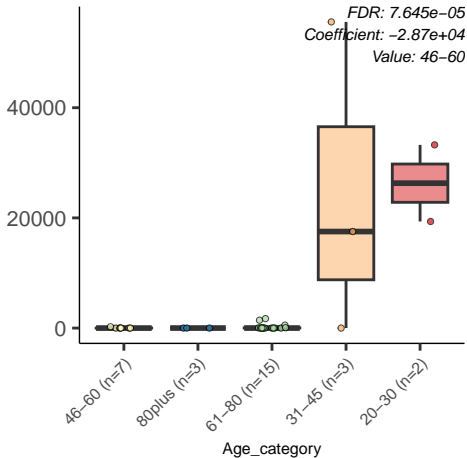

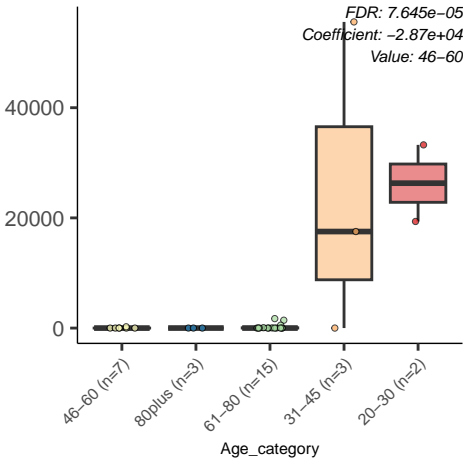

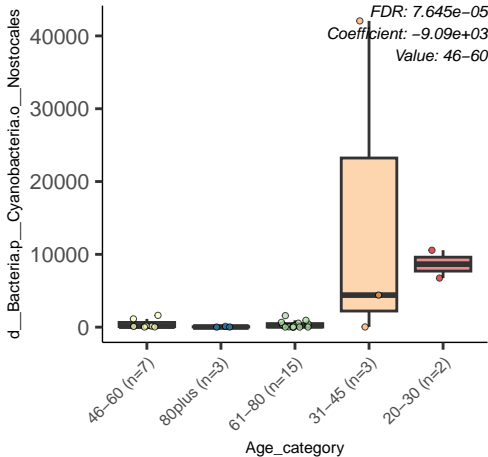



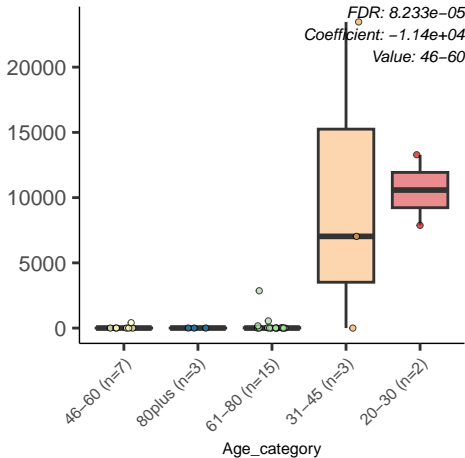

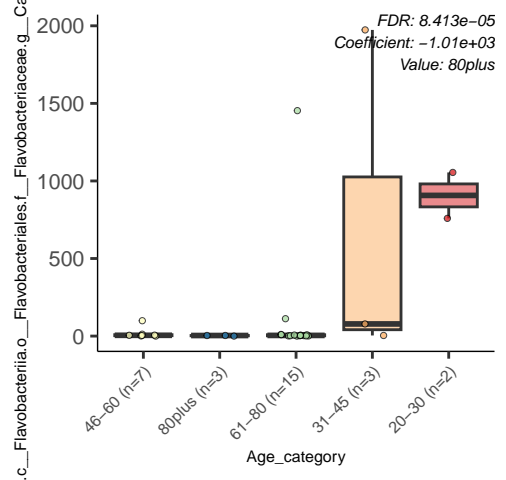

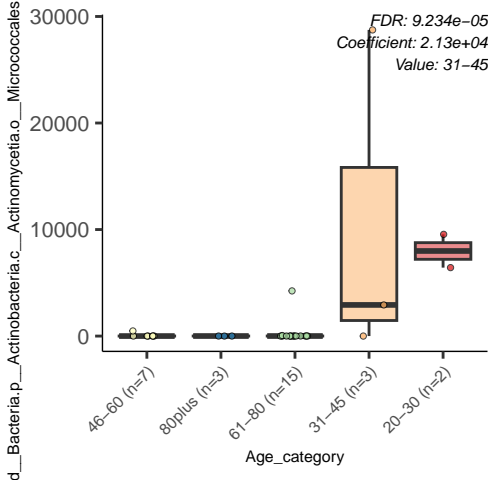

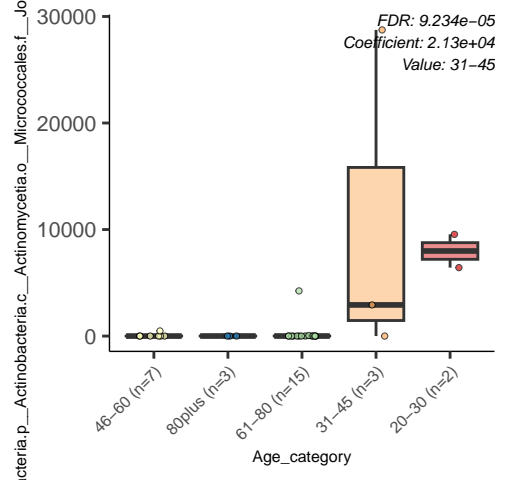

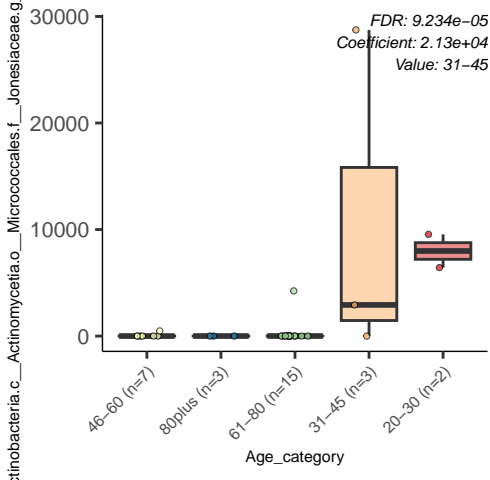

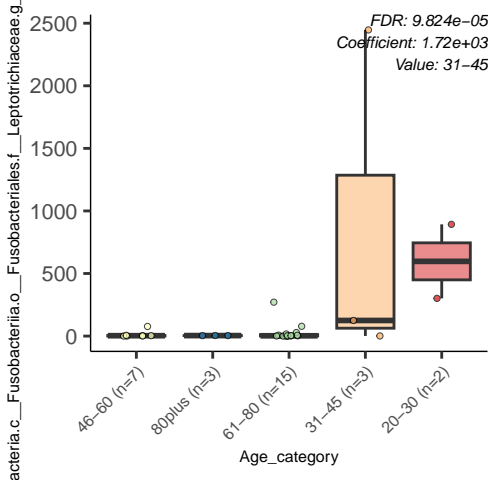

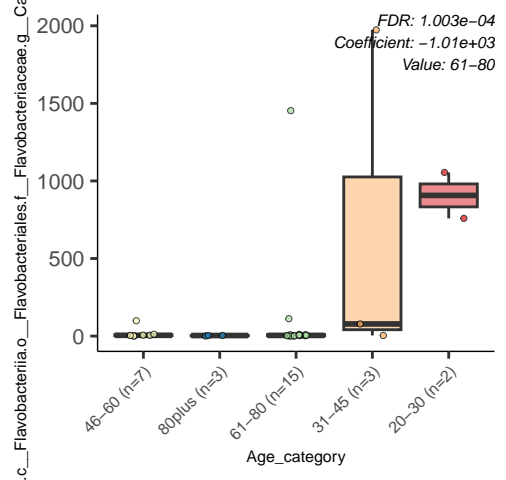

Actinobacteria.c\_Actinomycetia.o\_Corynebacteriales.f\_Mycobac

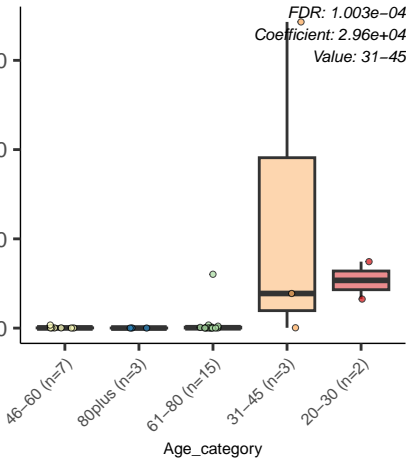



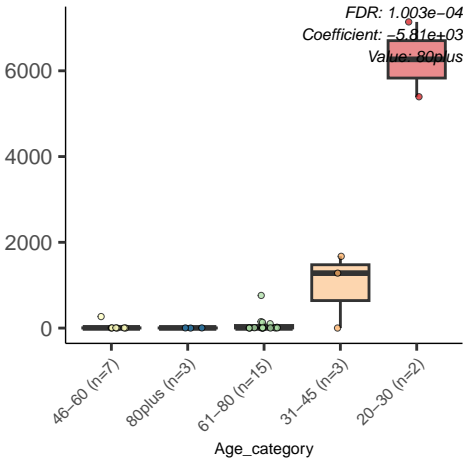

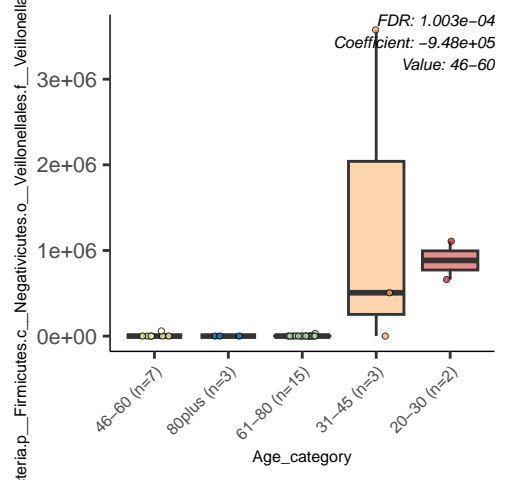

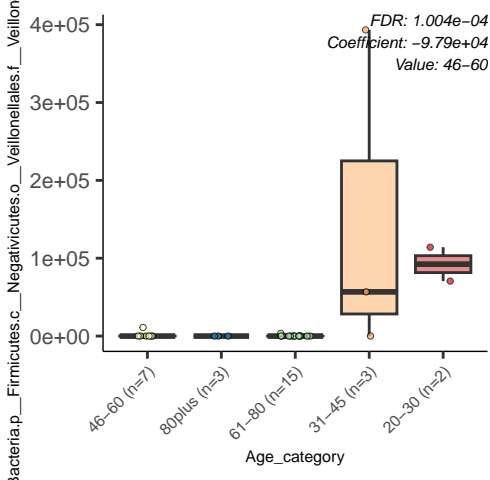

roidetes.c\_\_Cytophagia.o\_\_Cytophagales.f\_\_Cytophagaceae.g\_\_Sp

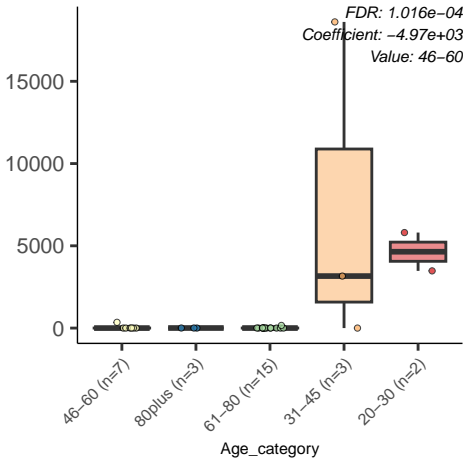

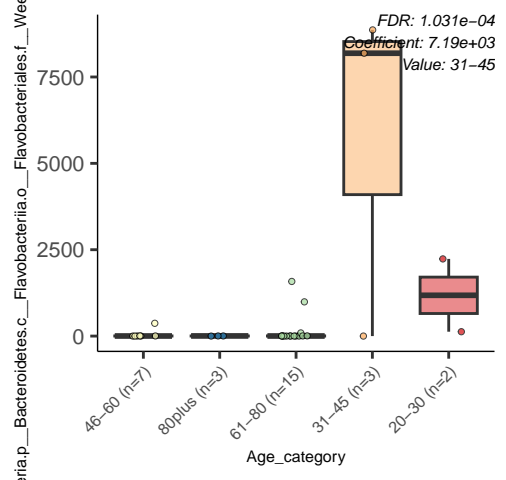

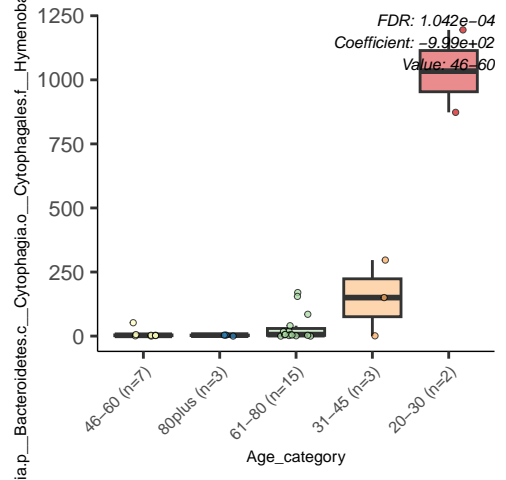

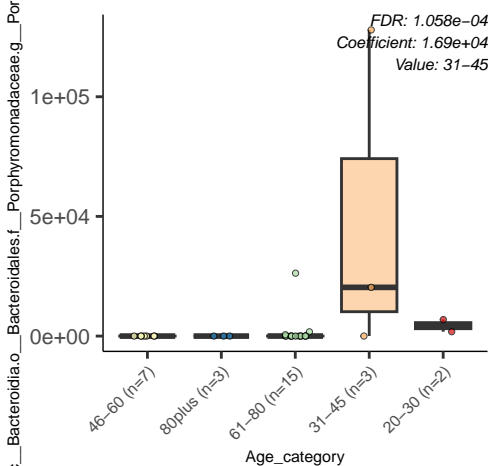

es.c\_\_Bacilli.o\_\_Lactobacillales.f\_\_Streptococcaceae.g\_\_Streptococ

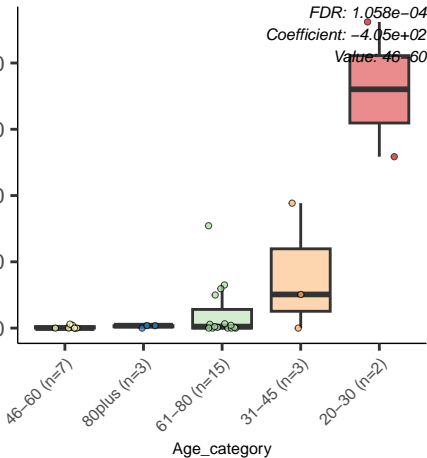



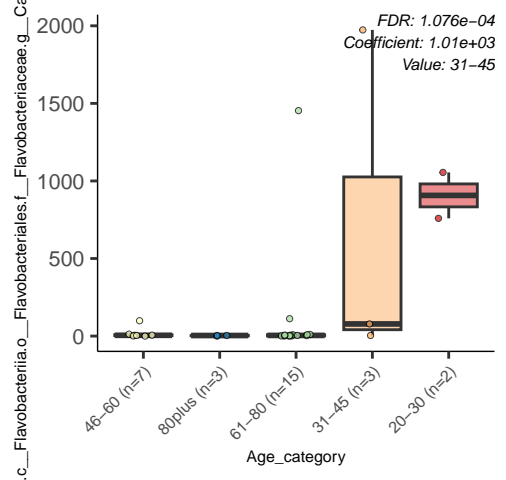

icutes.c\_\_Negativicutes.o\_\_Veillonellales.f\_\_Veillonellaceae.g\_\_Meg

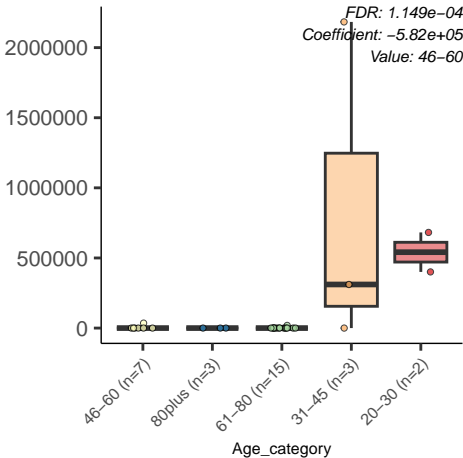

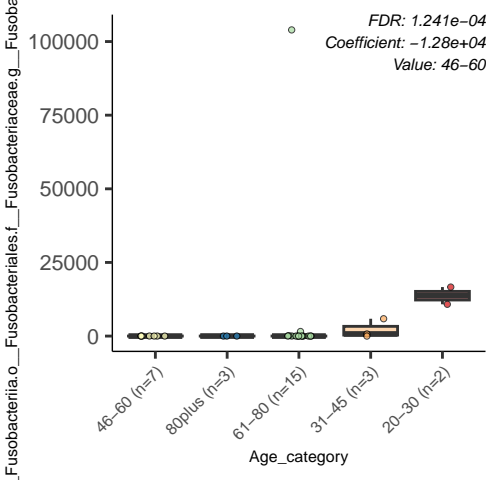

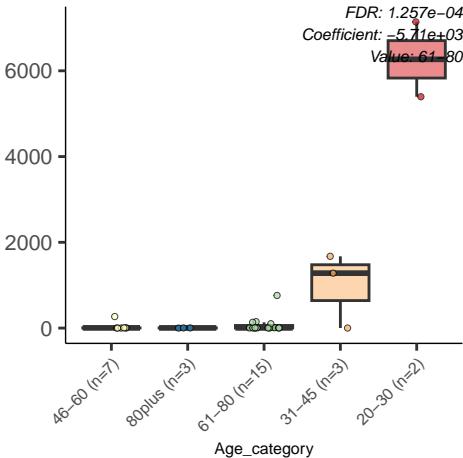

Firmicutes.c\_\_Erysipelotrichia.o\_\_Erysipelotrichales.f\_\_Erysipel

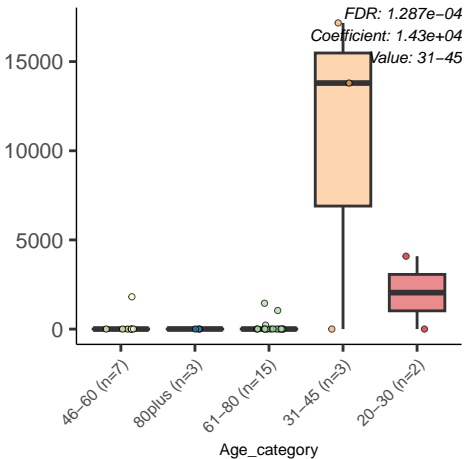

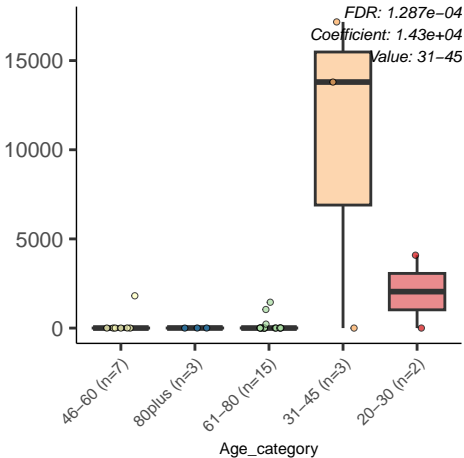

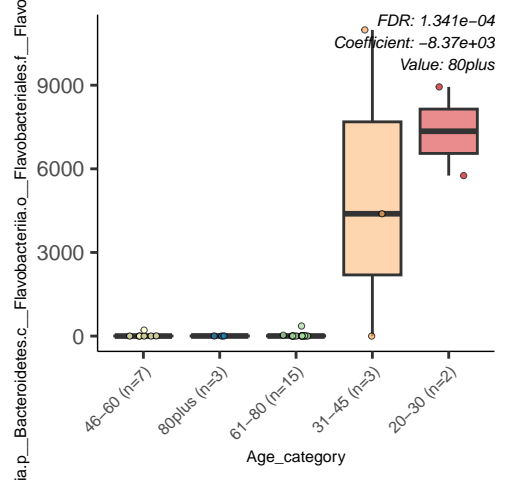

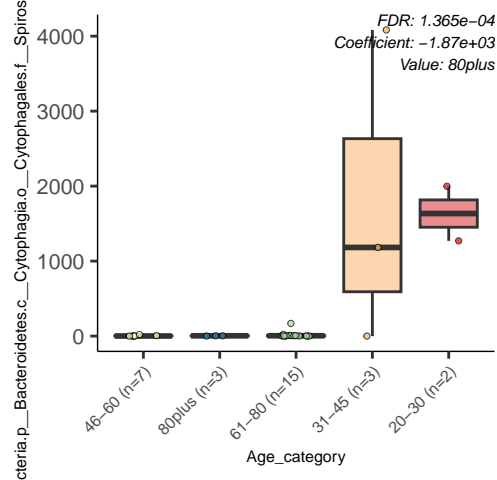



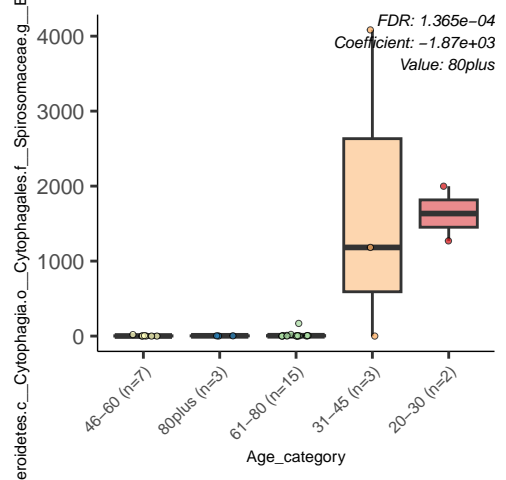

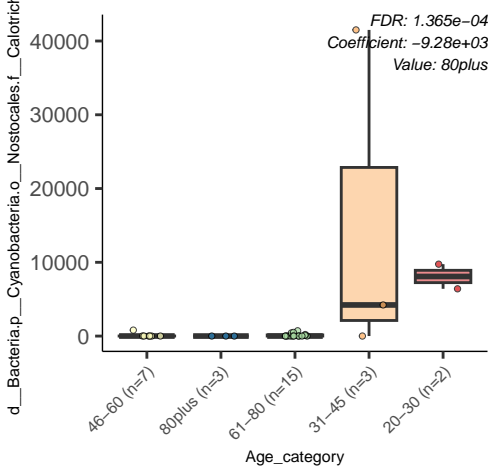

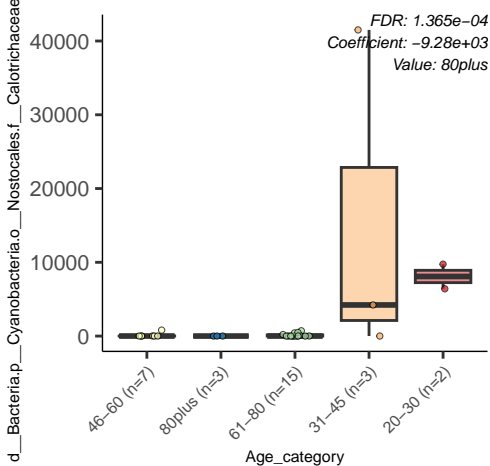

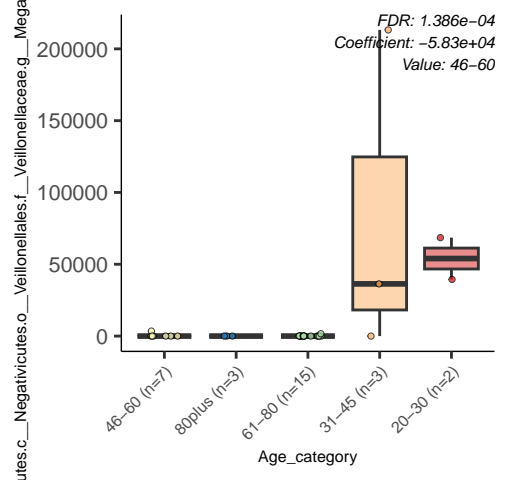

p\_\_Firmicutes.c\_\_Erysipelotrichia.o\_\_Erysipelotrichales.f\_\_Erysipe

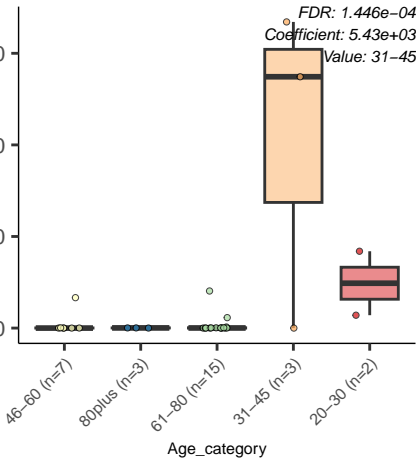

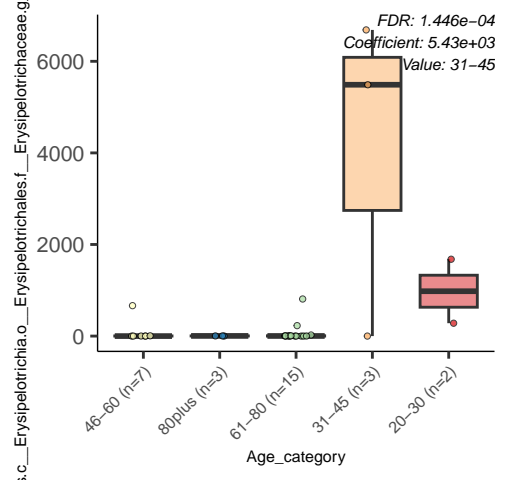

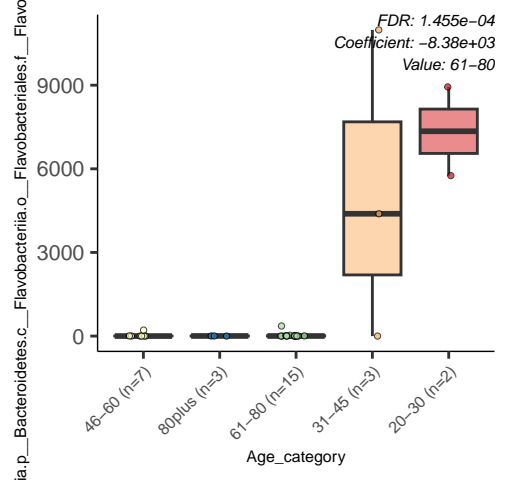

a.p\_\_Cyanobacteria.o\_\_Nostocales.f\_\_Calotrichaceae.g\_\_Calothrix:

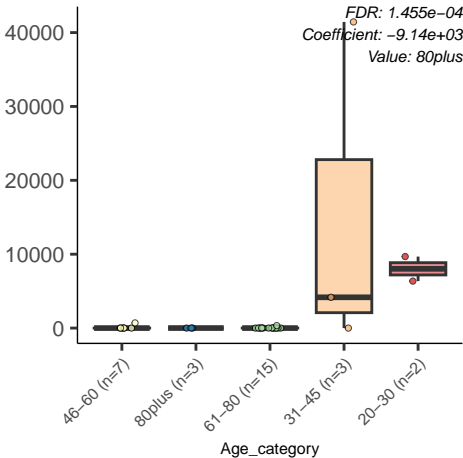



p\_Firmicutes.c\_\_Erysipelotrichia.o\_\_Erysipelotrichales.f\_\_Erysipe

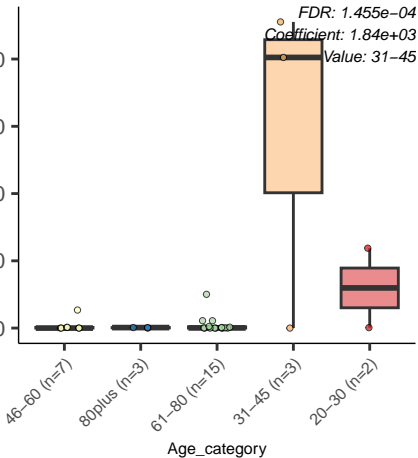

es.c\_\_Erysipelotrichia.o\_\_Erysipelotrichales.f\_\_Erysipelotrichaceae

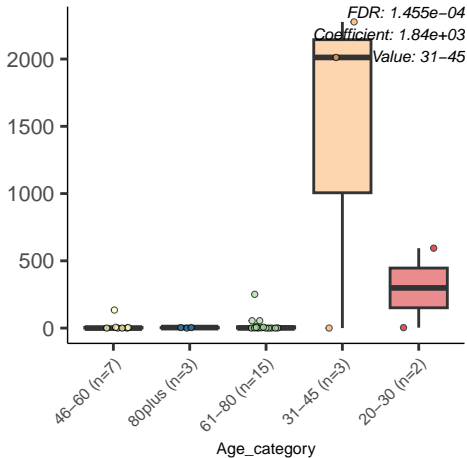

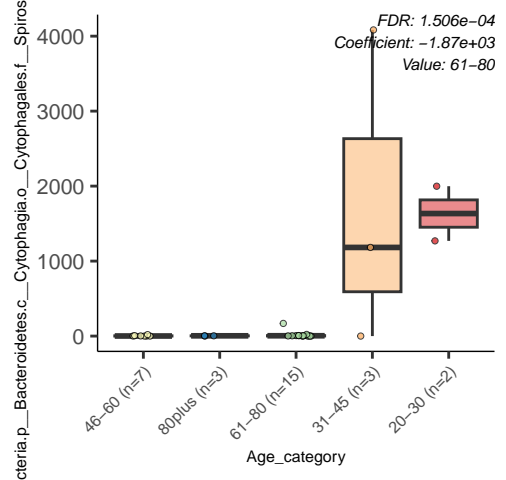

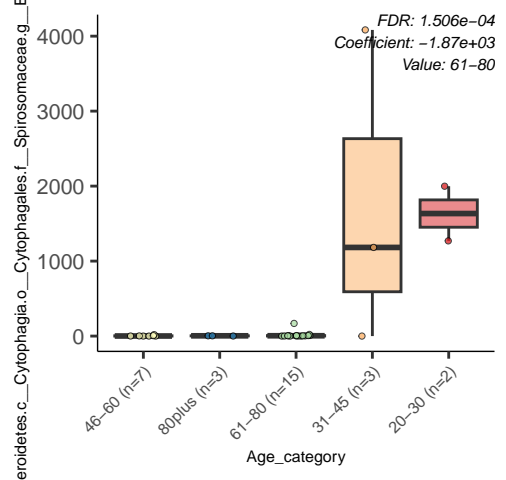

detes.c\_\_Flavobacteriia.o\_\_Flavobacteriales.f\_\_Flavobacteriaceae.g

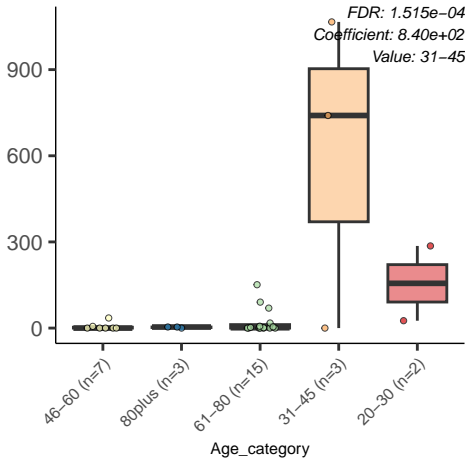

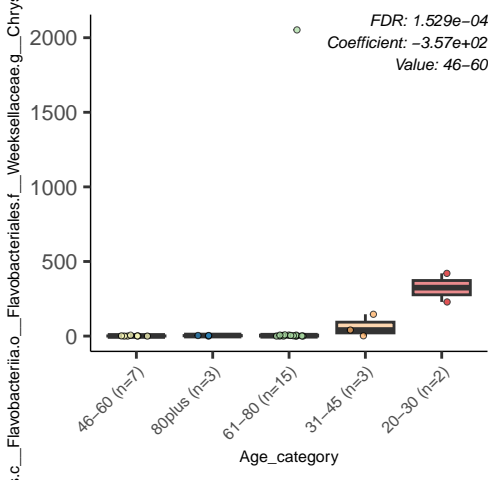

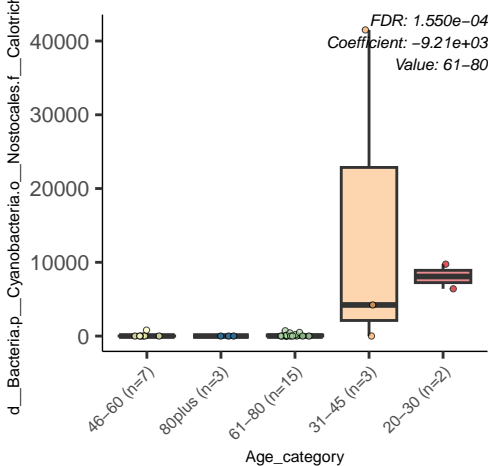

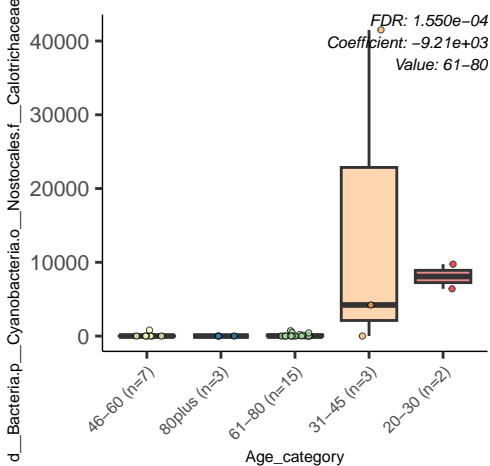



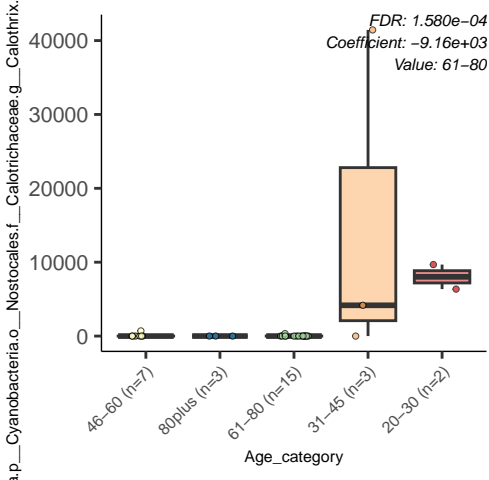

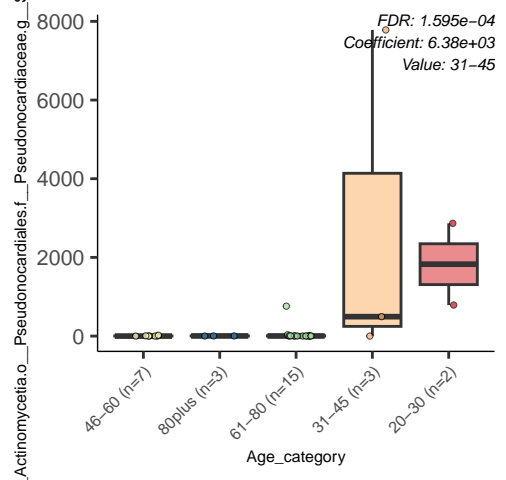

d\_Bacteria.p\_Fusobacteria

0e+00

5e+05

1e+06

46-60 (n=7)

80plus (n=3)

61-80 (n=15)

31-45 (n=3)

20-30 (n=2)

Age\_category

FDR: 1.888e-04  
Coefficient: -1.01e+06  
Value: 80plus

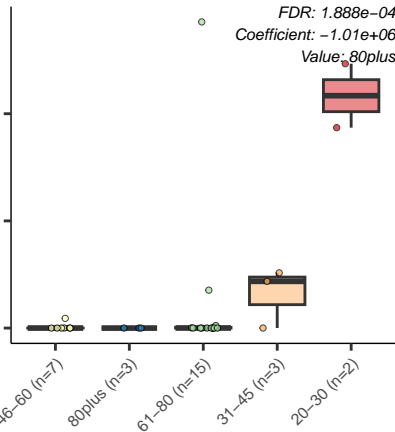

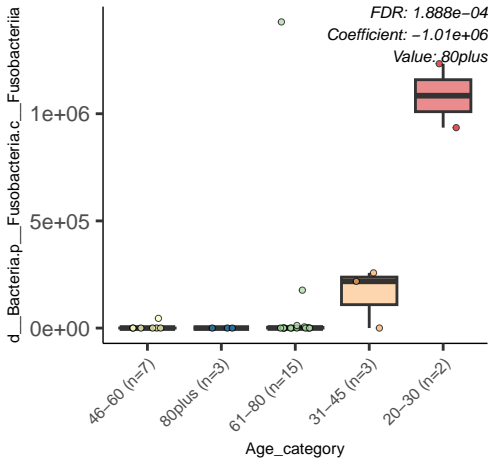

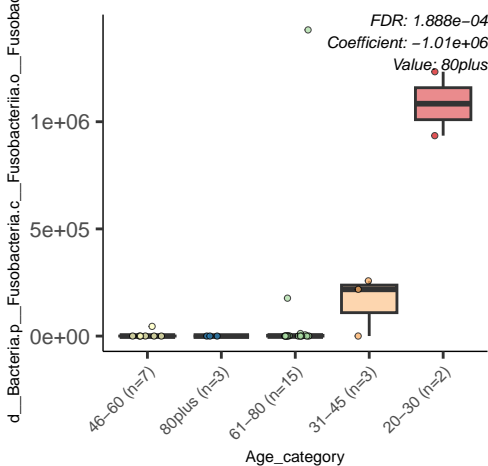

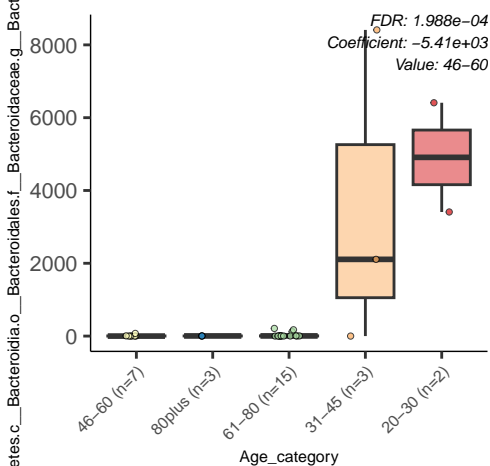

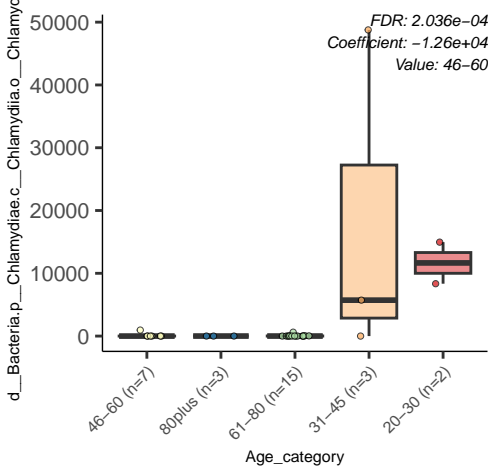

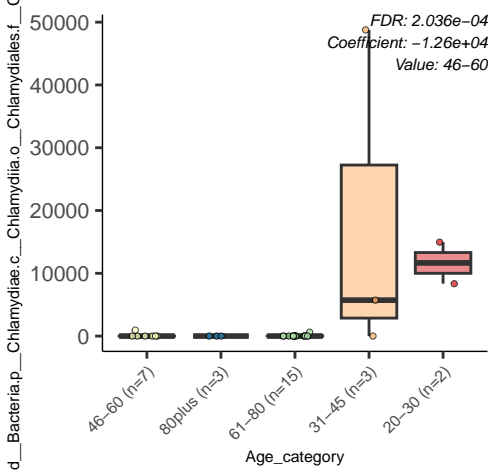



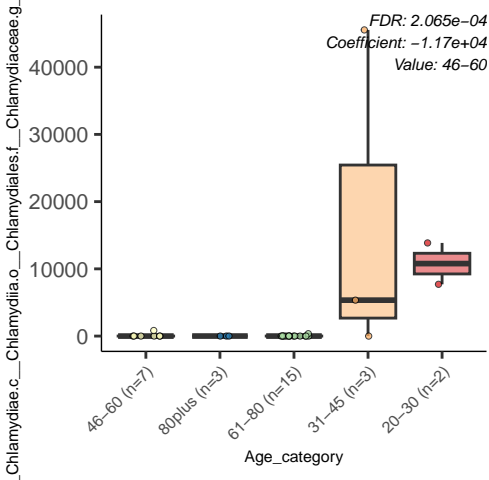

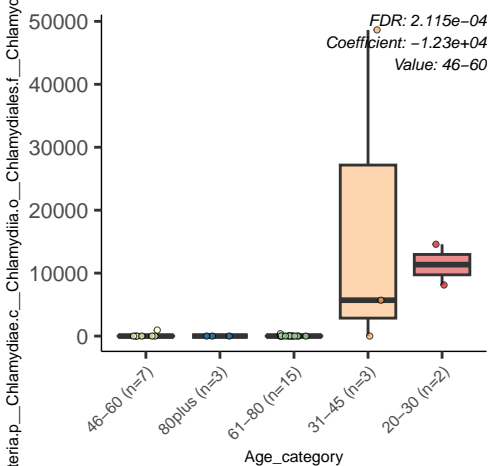

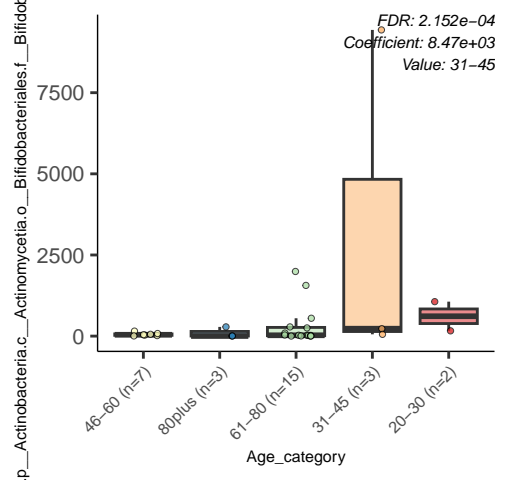

irmicutes.c\_\_Negativicutes.o\_\_Veillonellales.f\_\_Veillonellaceae.g\_\_L

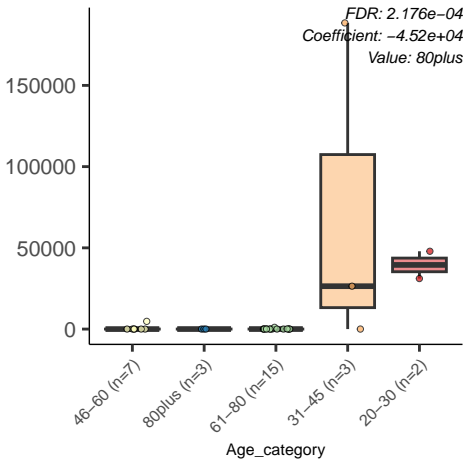

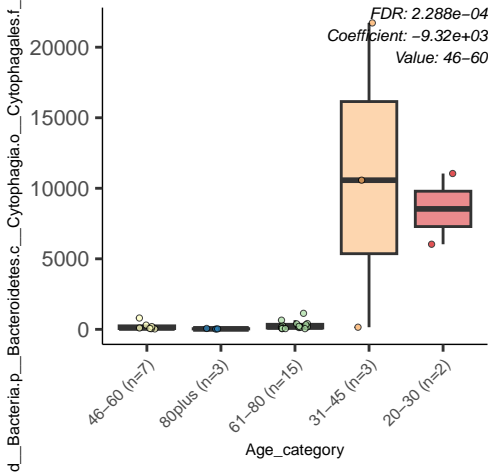

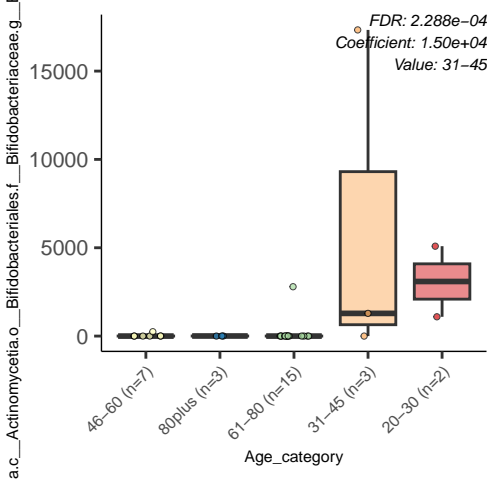

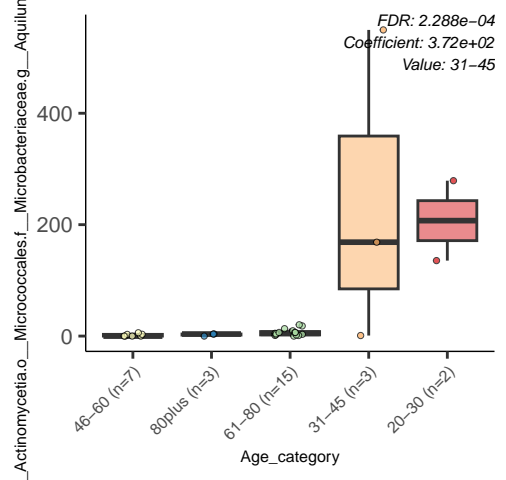

irmicutes.c\_\_Negativicutes.o\_\_Veillonellales.f\_\_Veillonellaceae.g\_\_L

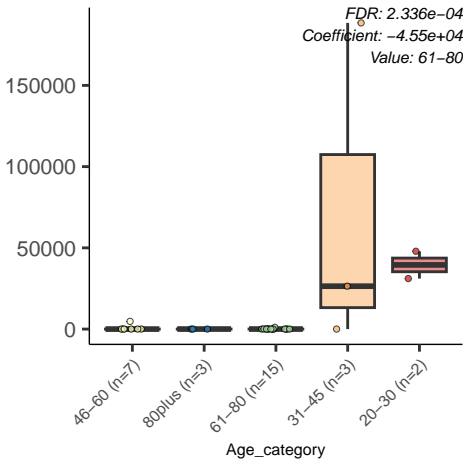



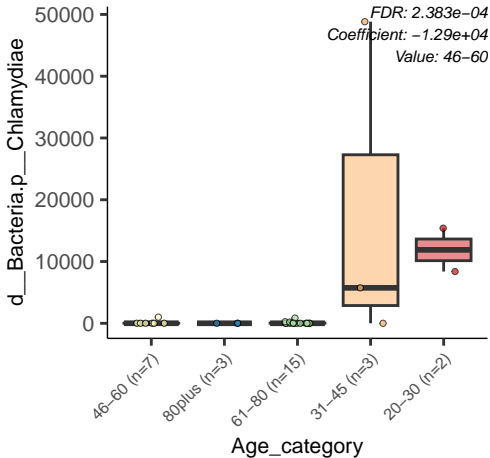

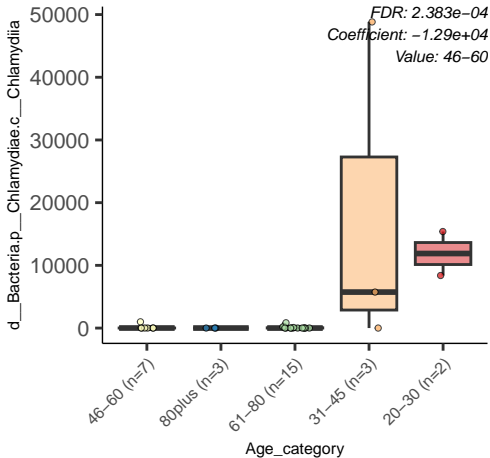

d\_Bacteria.p\_Fusobacteria

0e+00

5e+05

1e+06

46-60 (n=7)

80plus (n=3)

61-80 (n=15)

31-45 (n=3)

20-30 (n=2)

Age\_category

FDR: 2.383e-04  
Coefficient: -9.87e+05  
Value: 61-80

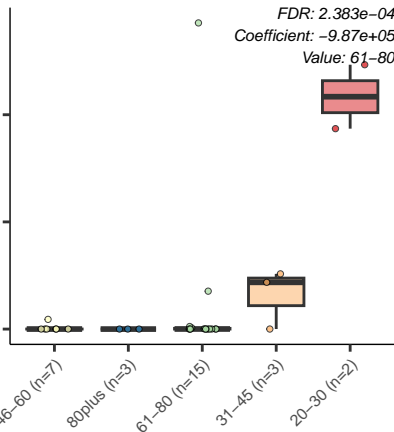

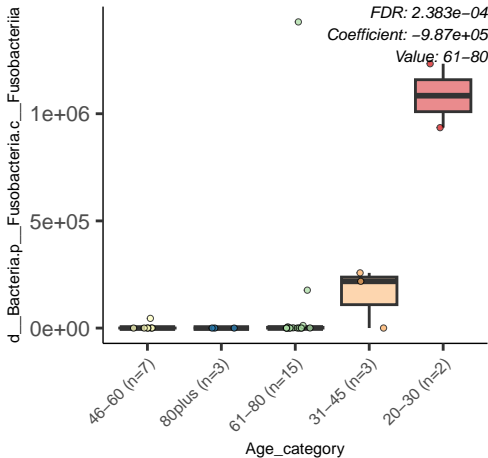

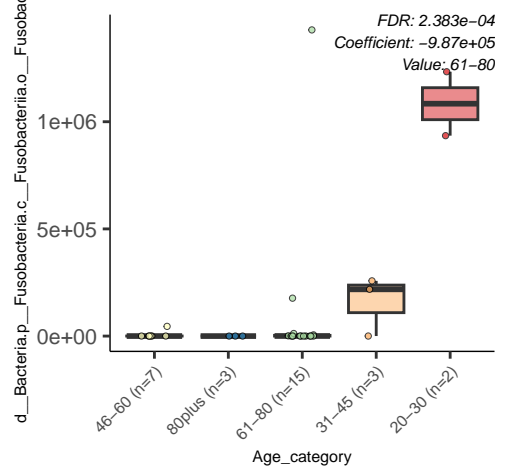

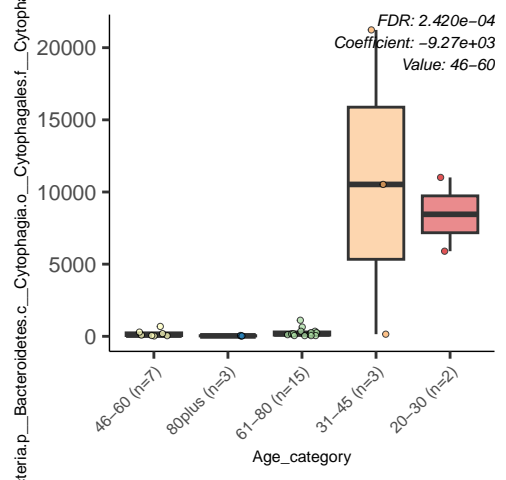

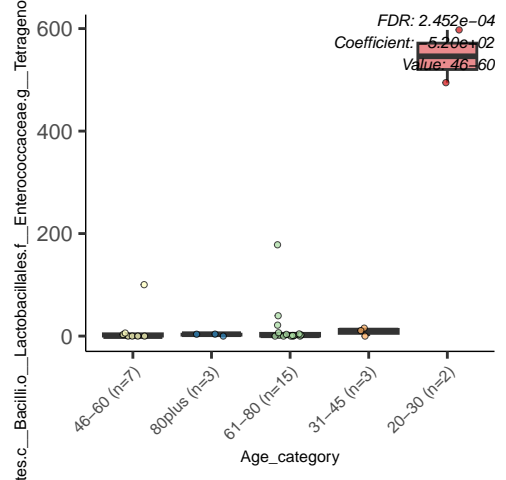

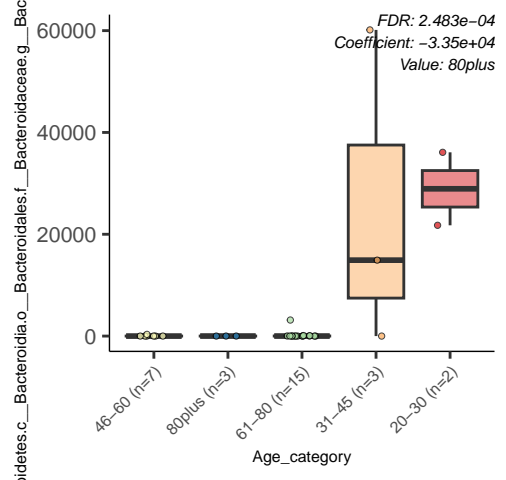



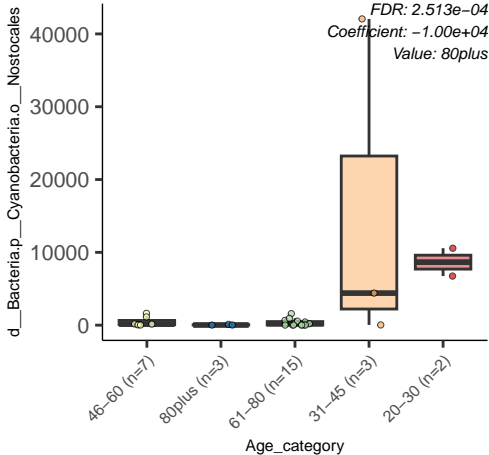

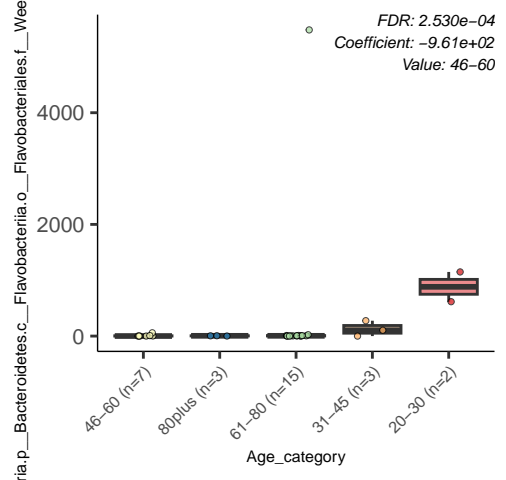

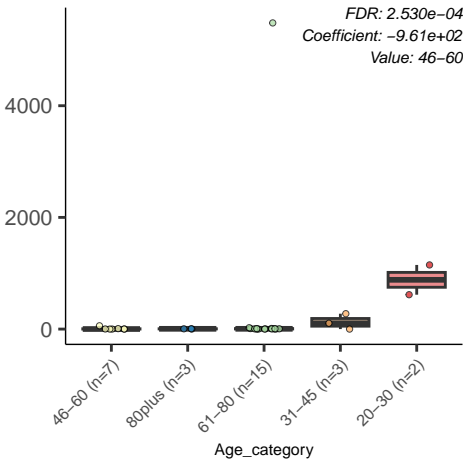

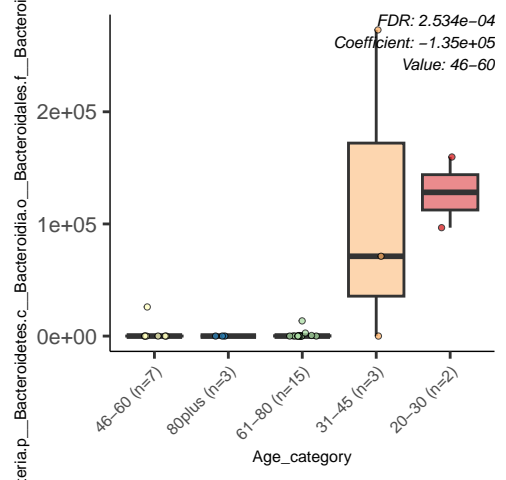

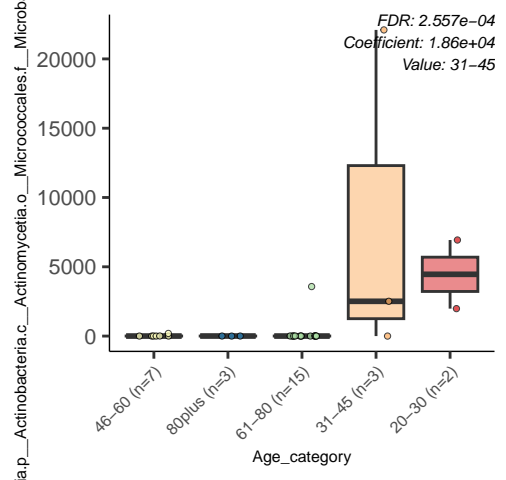

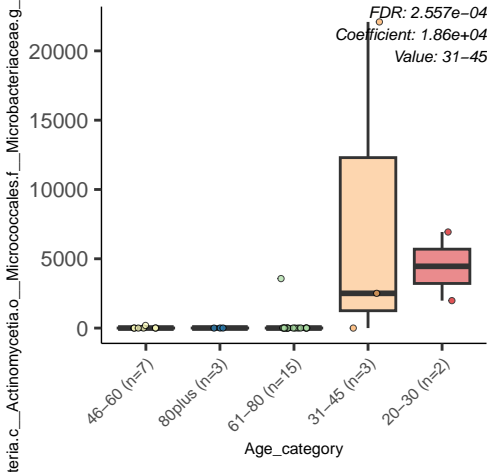

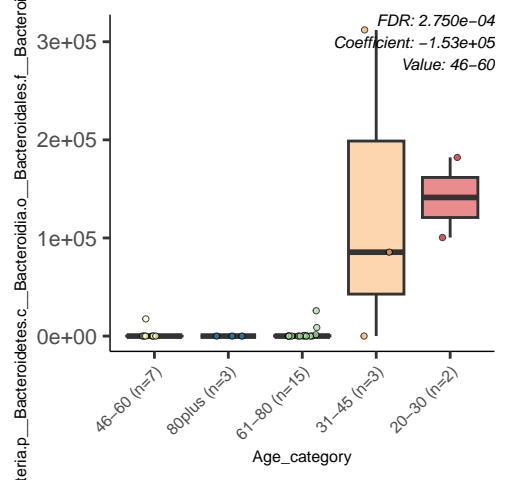

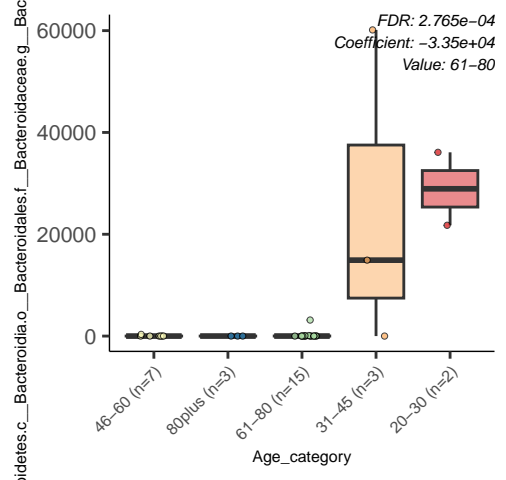



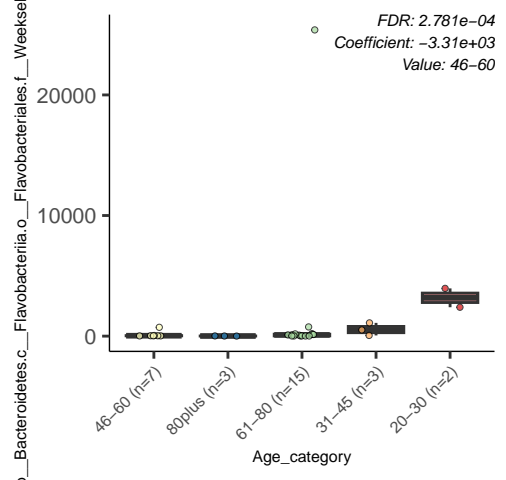

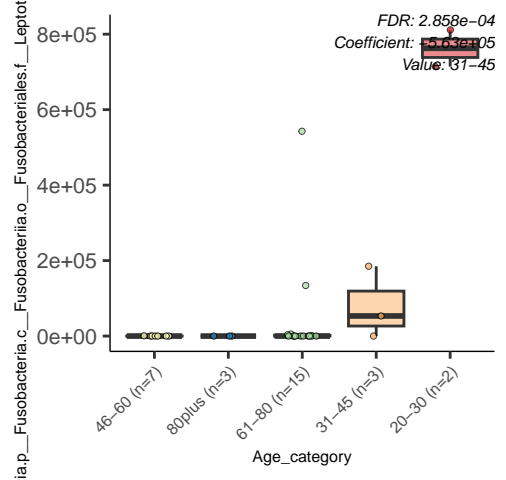

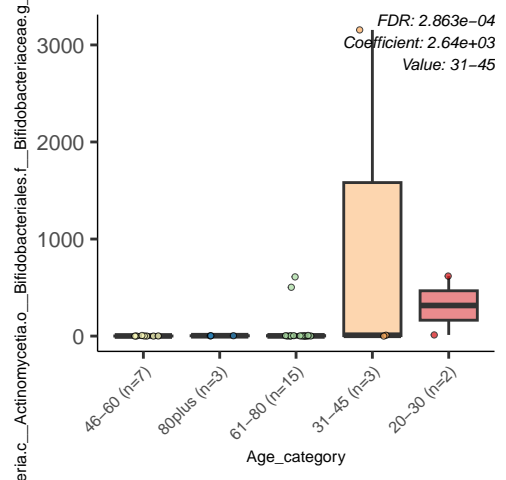

eria.p\_\_Bacteroidetes.c\_\_Bacteroidia.o\_\_Bacteroidales.f\_\_Prevotell

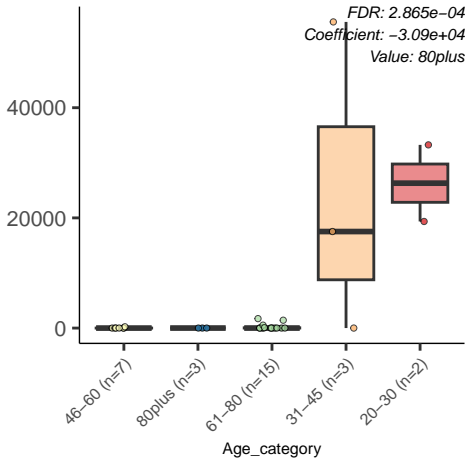

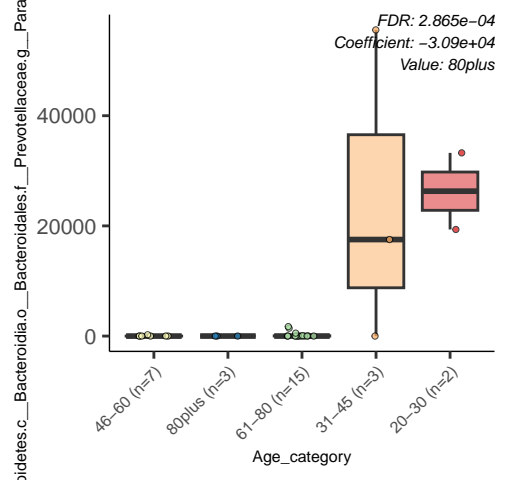

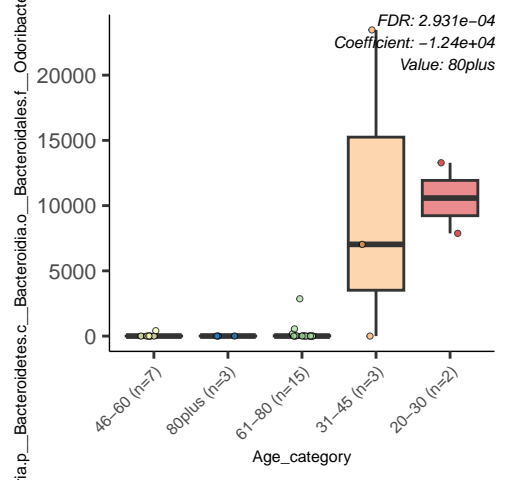

eria.p\_\_Bacteroidetes.c\_\_Bacteroidia.o\_\_Bacteroidales.f\_\_Barnesi

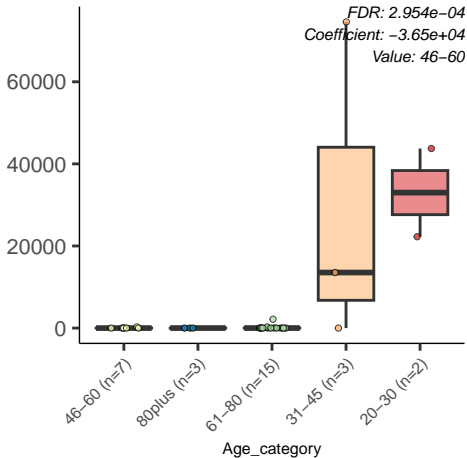

eroidetes.c\_\_Bacteroidia.o\_\_Bacteroidales.f\_\_Barnesiellaceae.g\_\_O

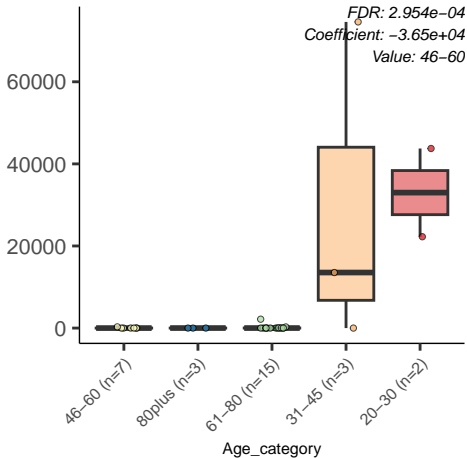



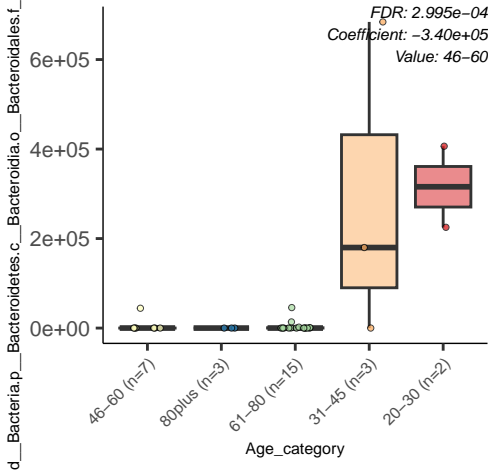

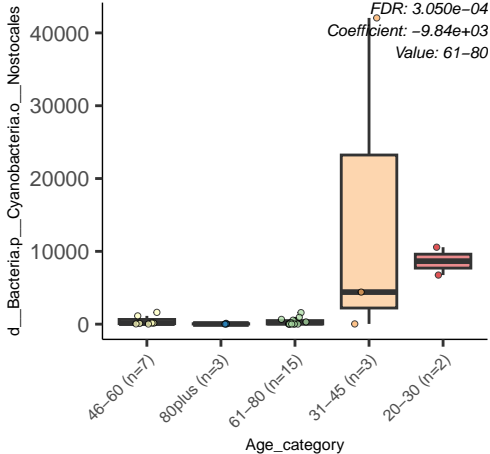

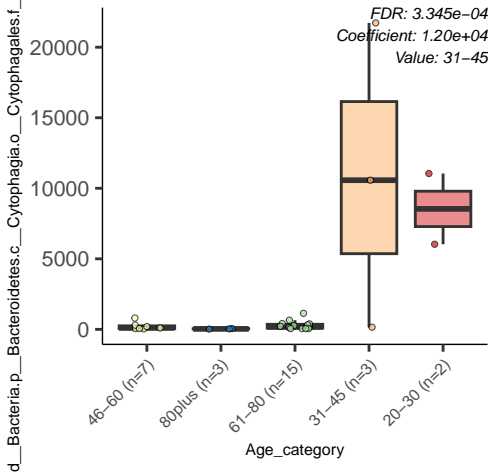

eria.p\_\_Bacteroidetes.c\_\_Bacteroidia.o\_\_Bacteroidales.f\_\_Prevotell

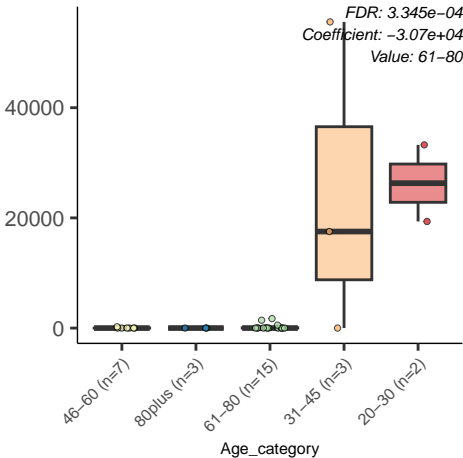

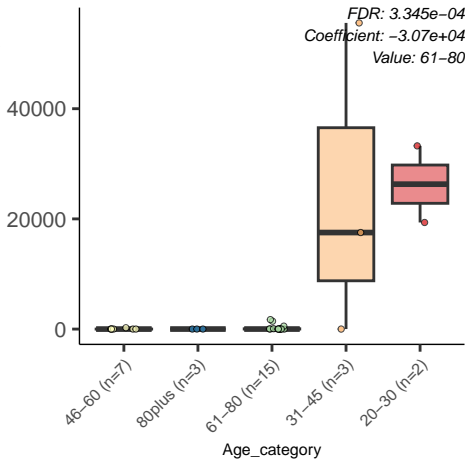

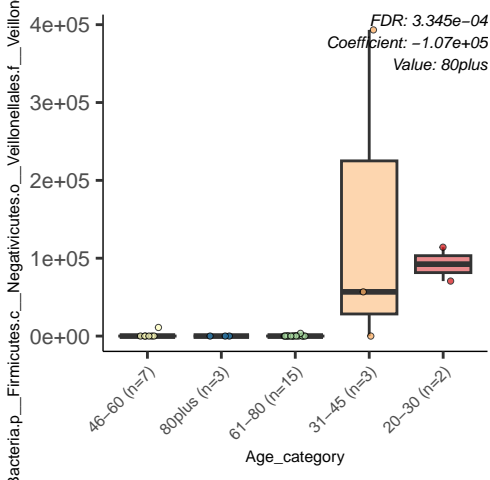

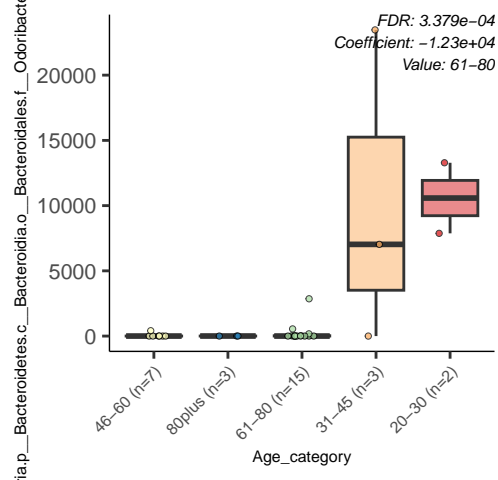

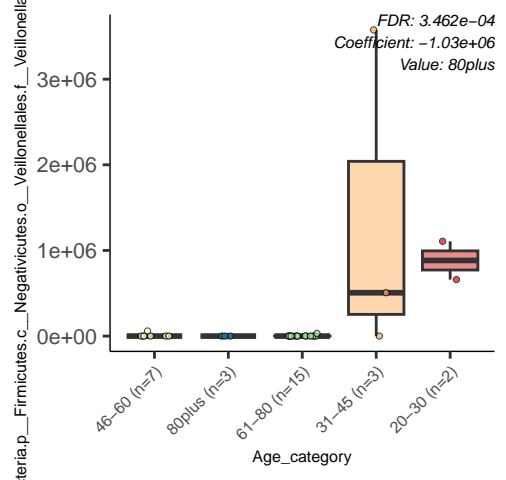



roidetes.c\_\_Cytophagia.o\_\_Cytophagales.f\_\_Cytophagaceae.g\_\_Sp

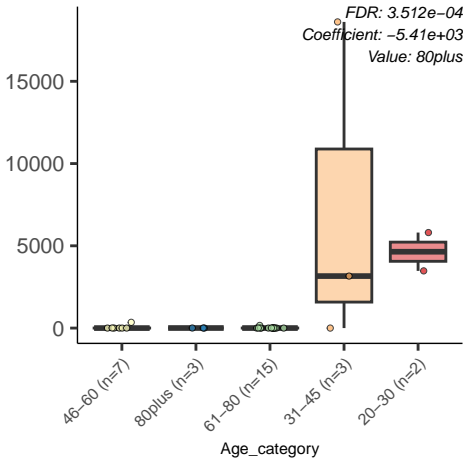

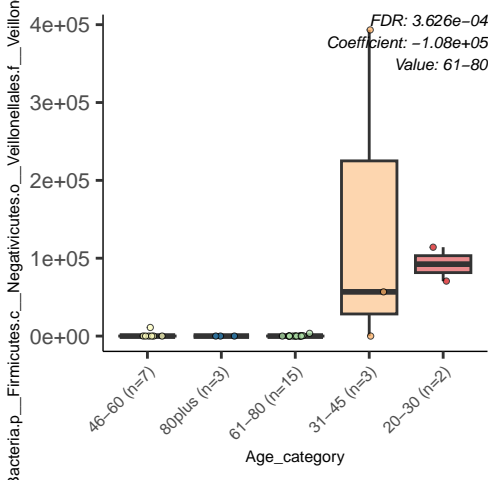



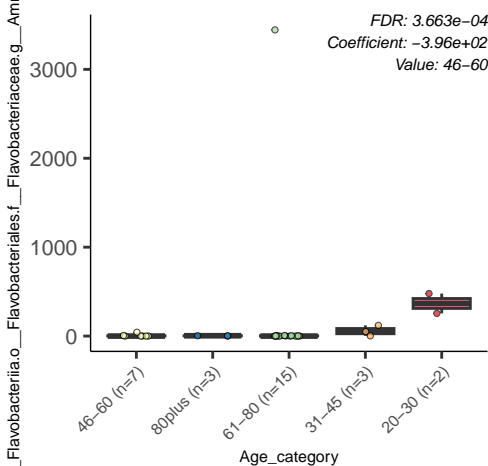

Actinomycetia.o\_\_Corynebacteriales.f\_\_Corynebacteriaceae.g\_\_C

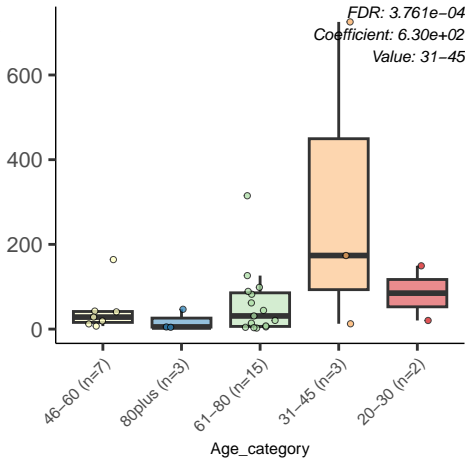

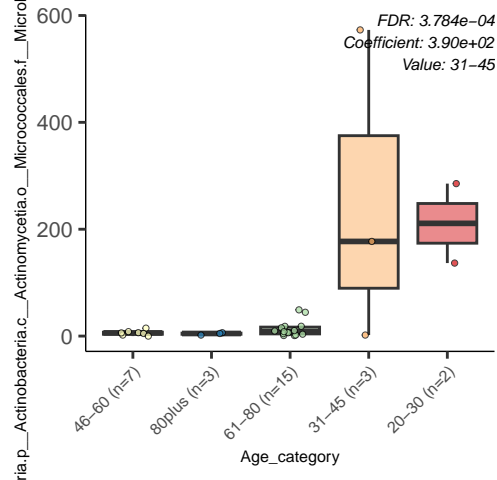

es.c\_\_Bacilli.o\_\_Lactobacillales.f\_\_Streptococcaceae.g\_\_Streptococ

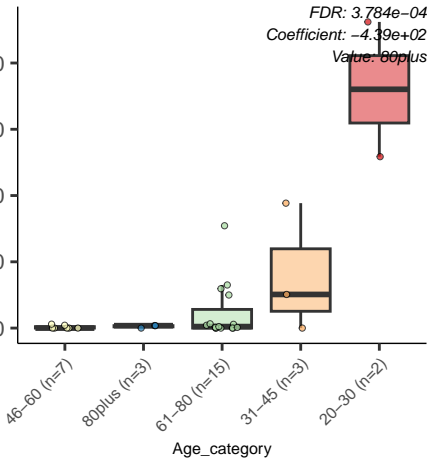

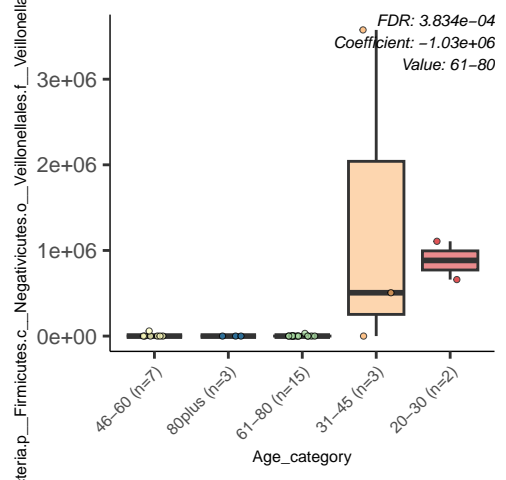



roidetes.c\_\_Cytophagia.o\_\_Cytophagales.f\_\_Cytophagaceae.g\_\_Sp

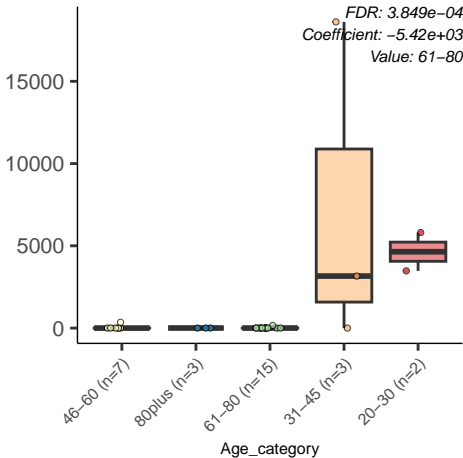

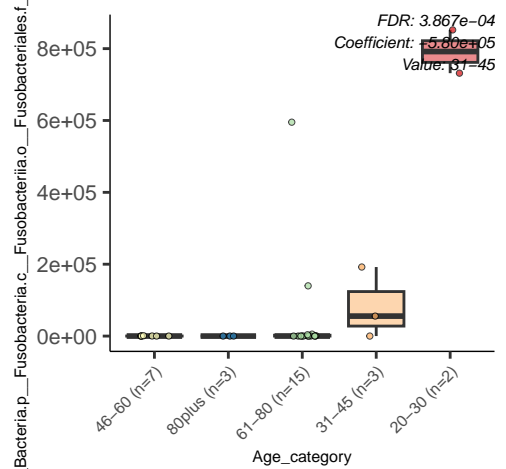

icutes.c\_\_Negativicutes.o\_\_Veillonellales.f\_\_Veillonellaceae.g\_\_Meg

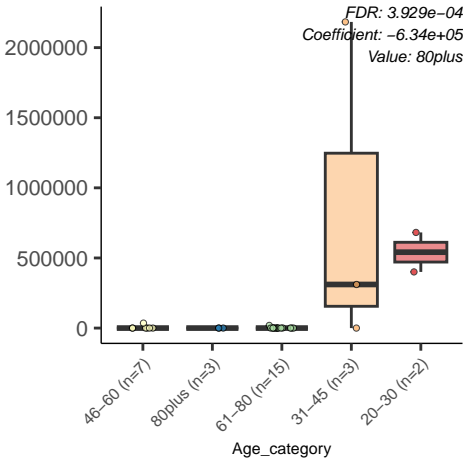

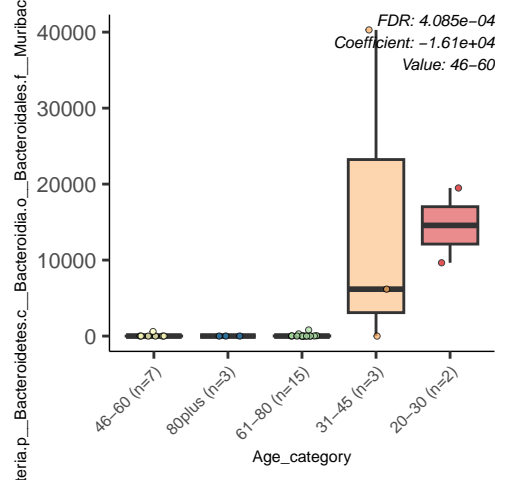

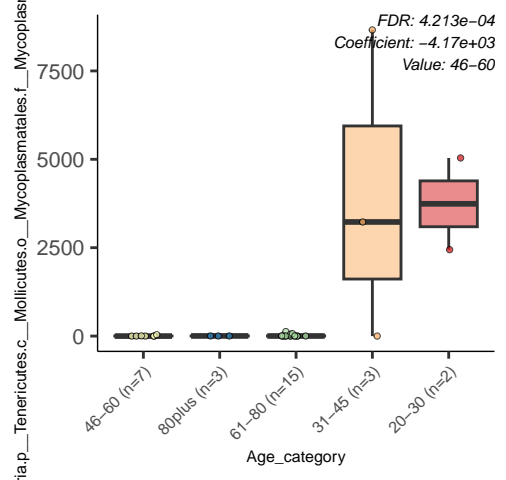

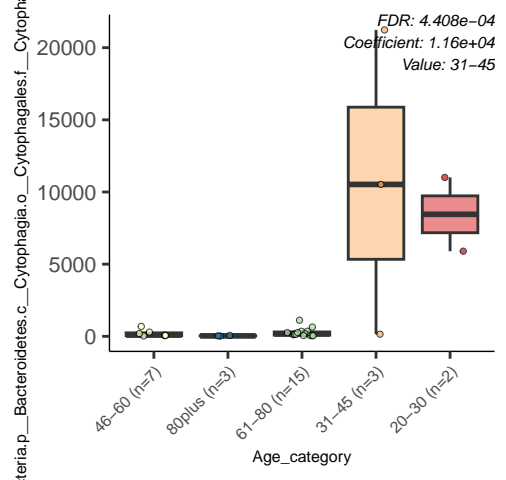

icutes.c\_\_Negativicutes.o\_\_Veillonellales.f\_\_Veillonellaceae.g\_\_Meg

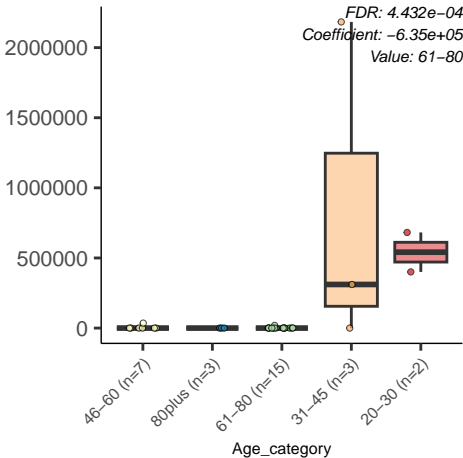

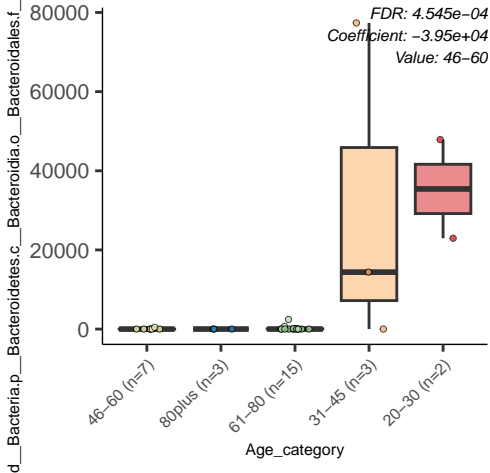



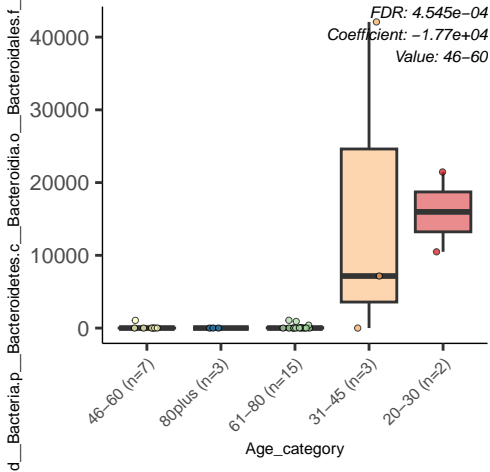

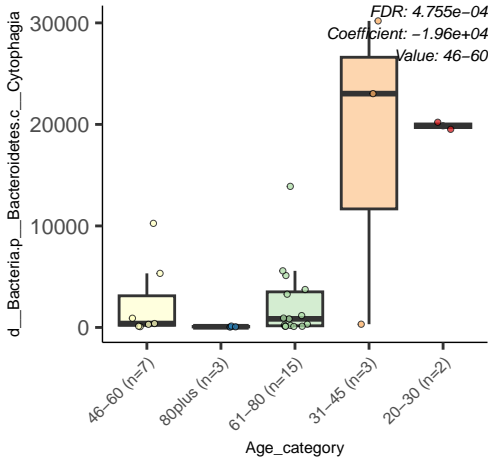

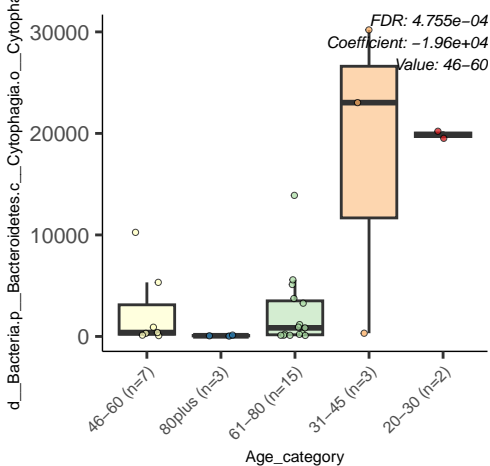

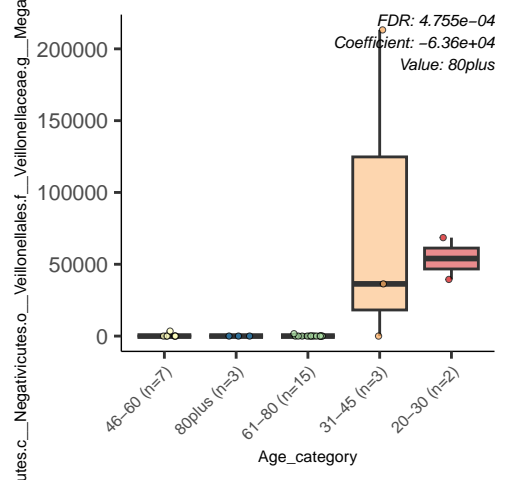

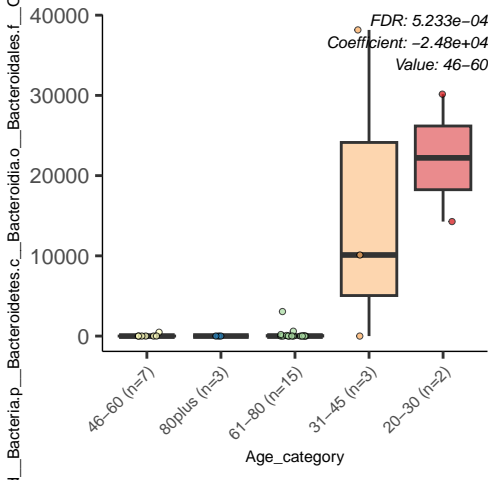

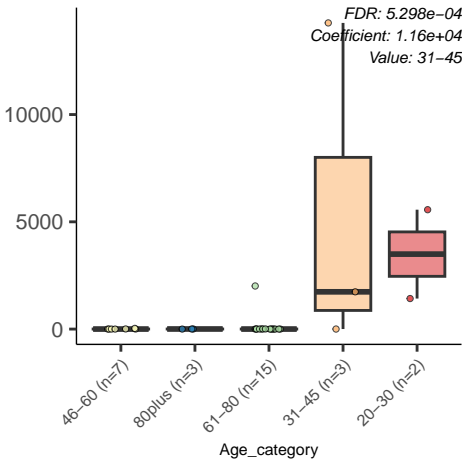

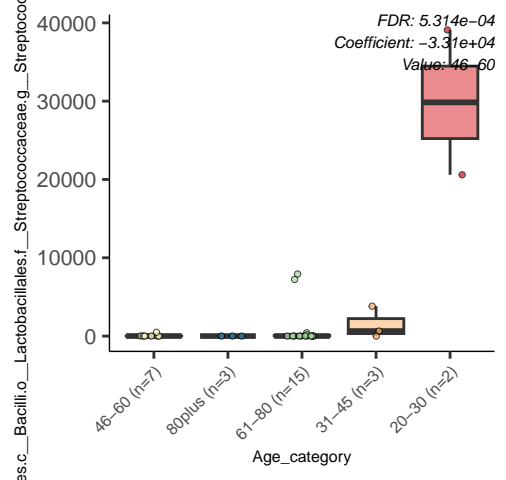

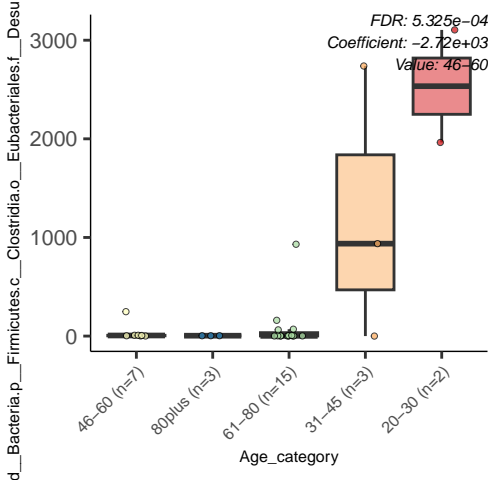



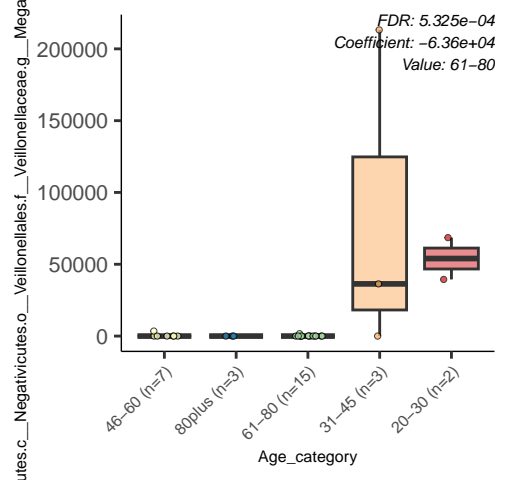

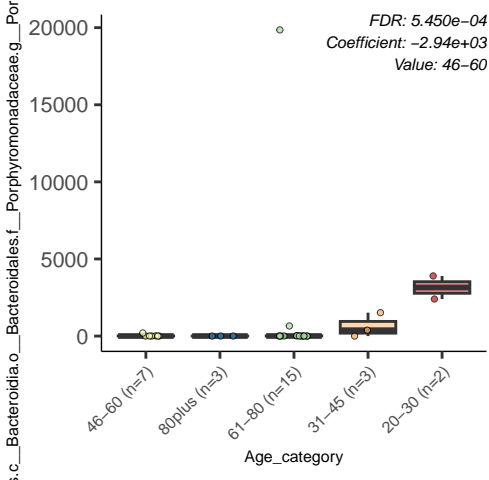

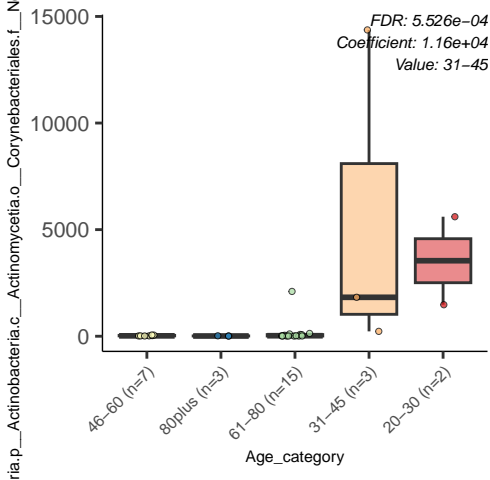

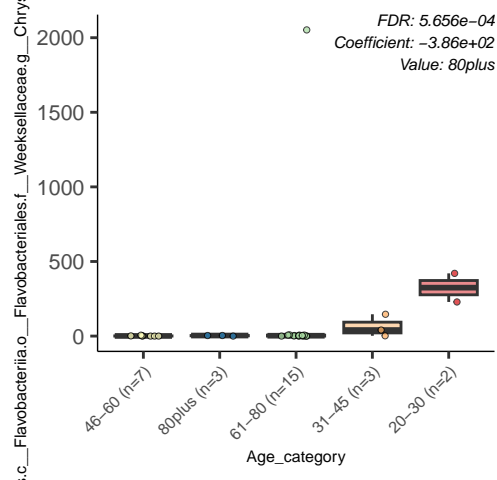

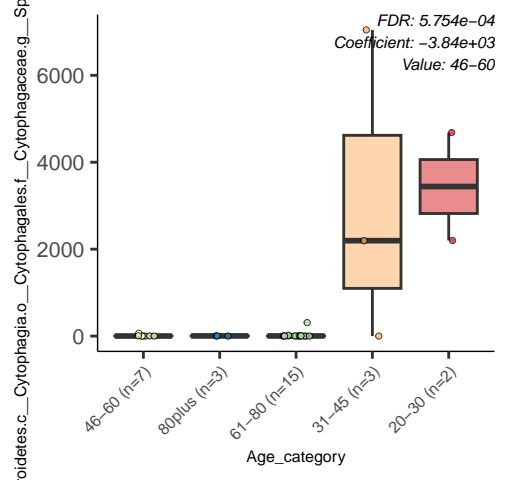

es.c\_\_Bacilli.o\_\_Lactobacillales.f\_\_Streptococcaceae.g\_\_Streptococ

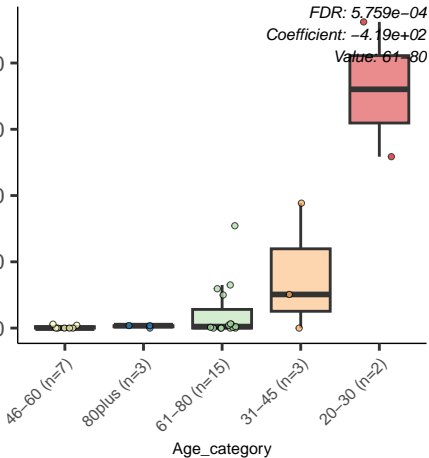

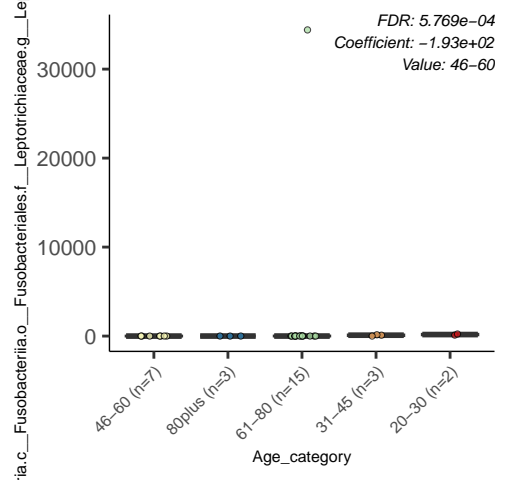

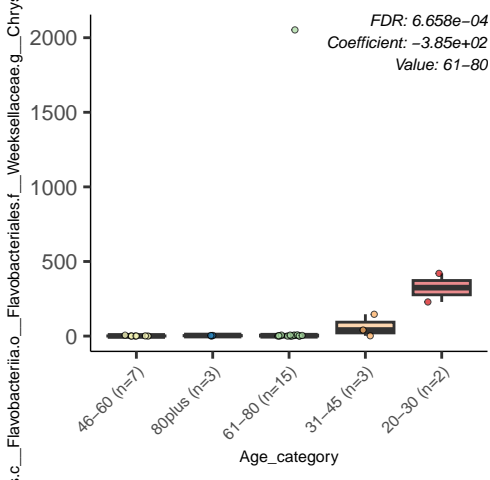



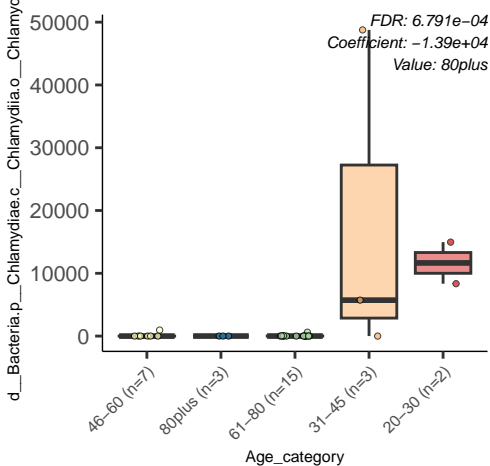

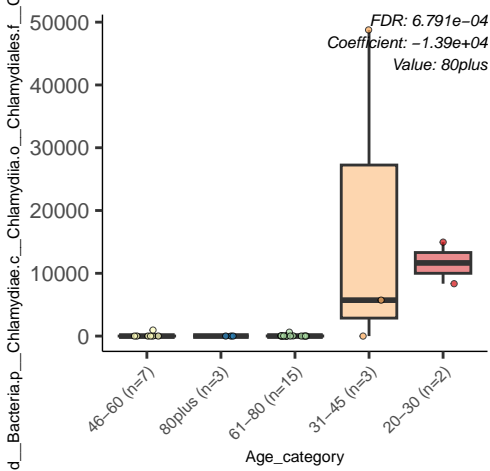

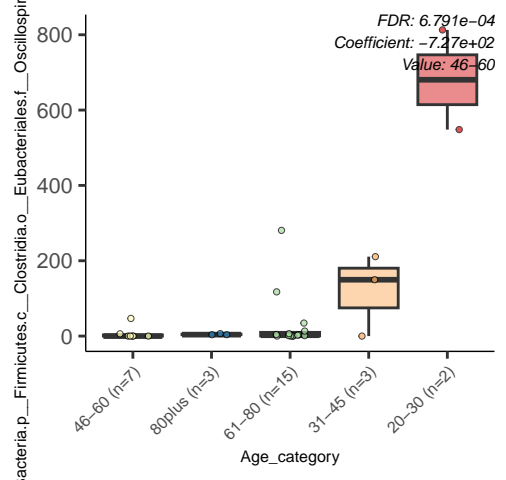

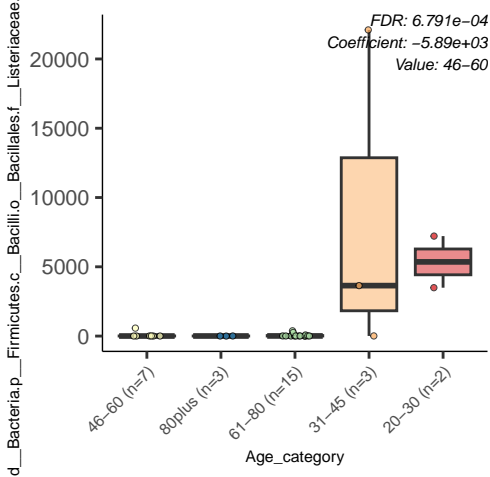

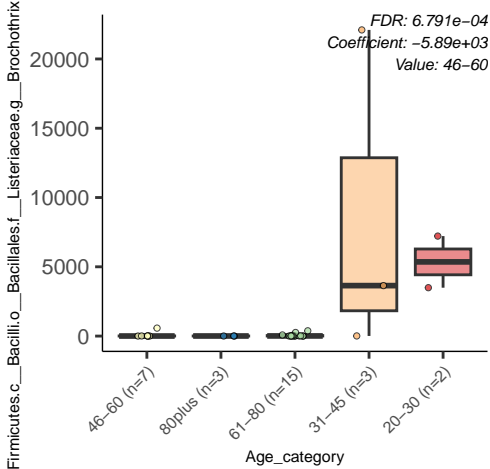

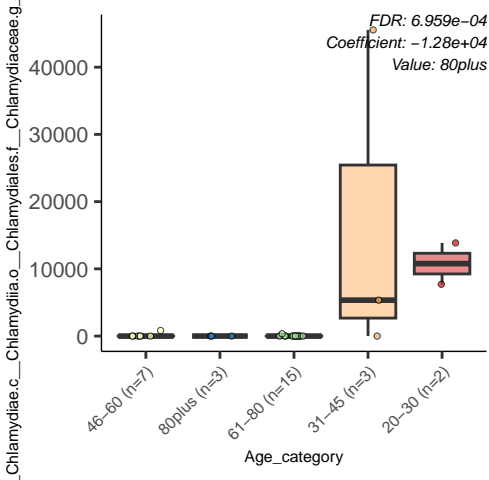

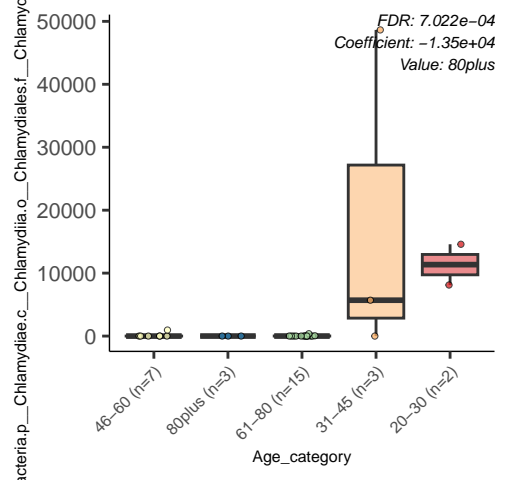

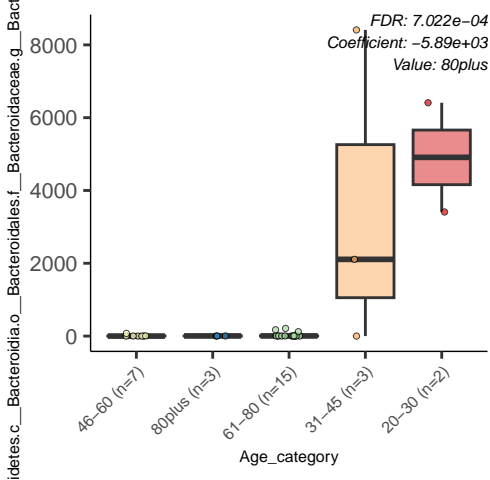



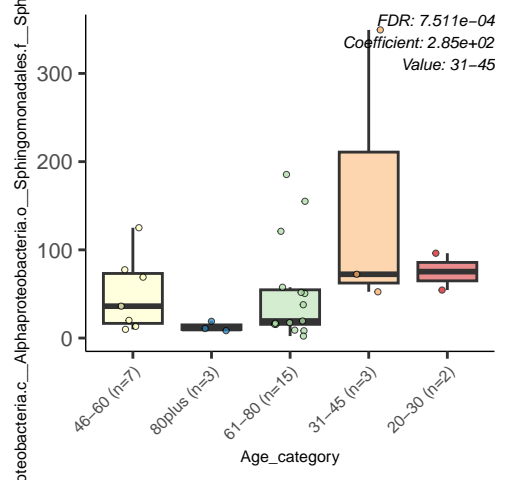

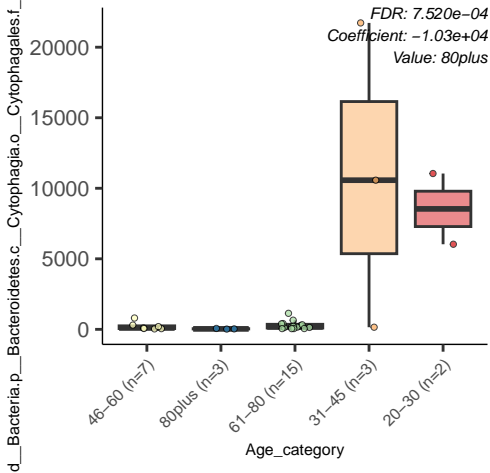

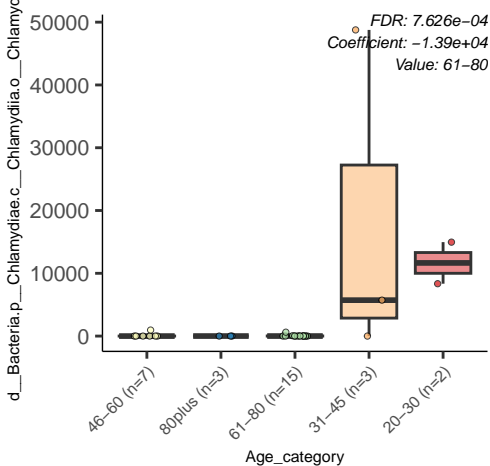

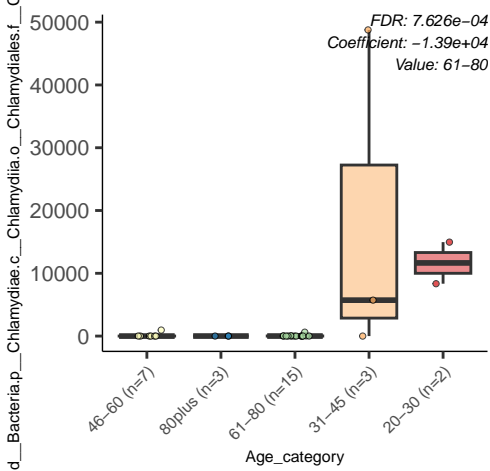

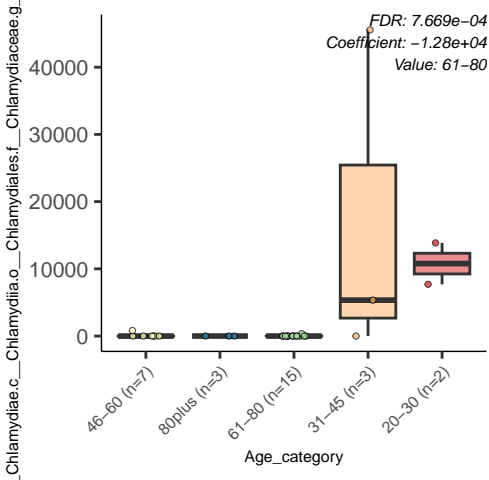

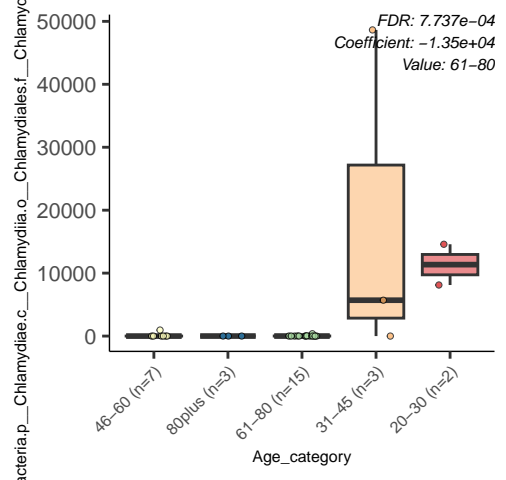

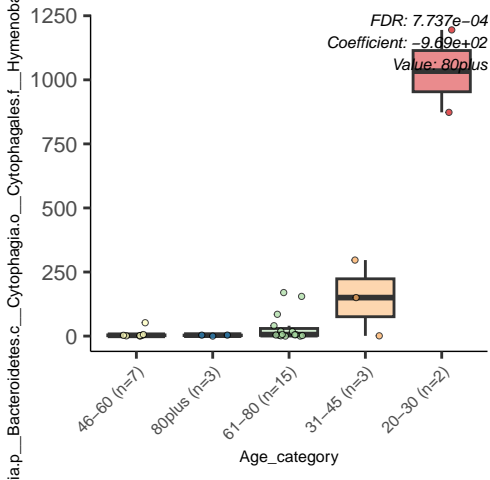

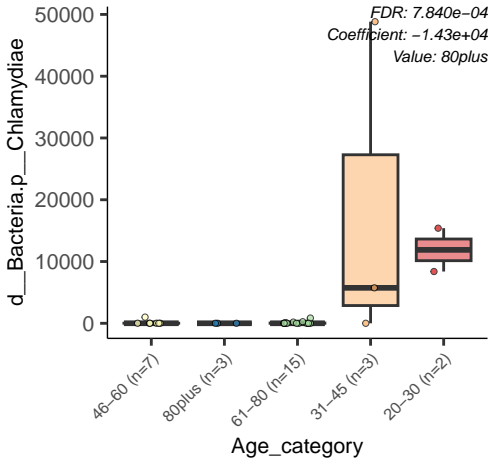



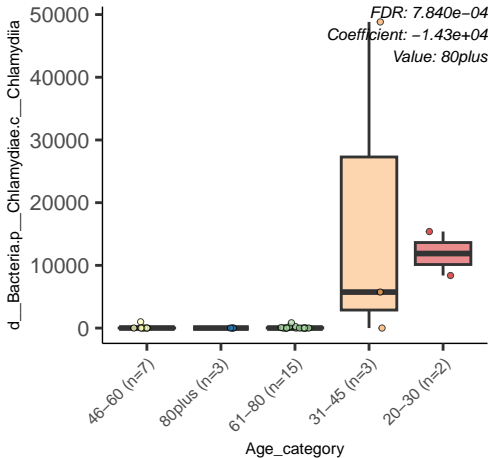

eria.p\_\_Bacteroidetes.c\_\_Bacteroidia.o\_\_Bacteroidales.f\_\_Bacteroid

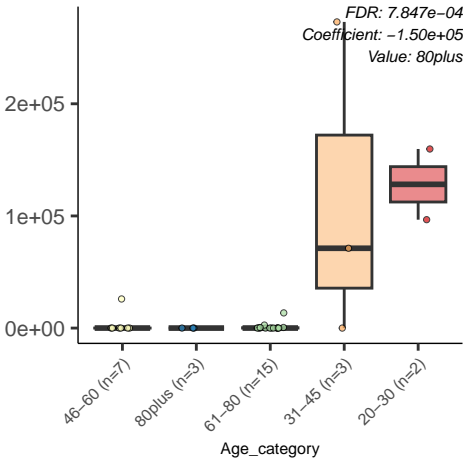

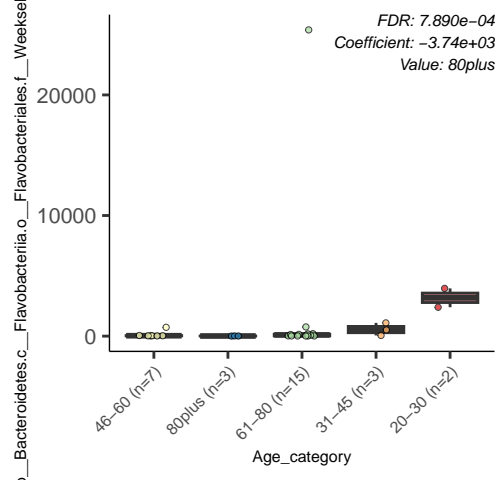

eria.p\_\_Bacteroidetes.c\_\_Bacteroidia.o\_\_Bacteroidales.f\_\_Bacteroid

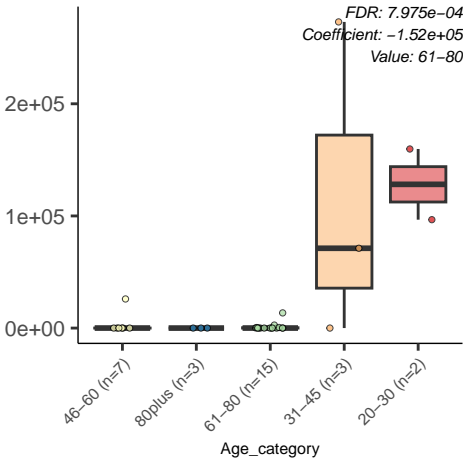

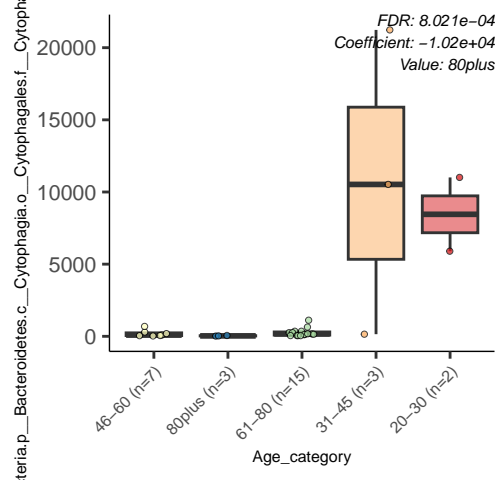

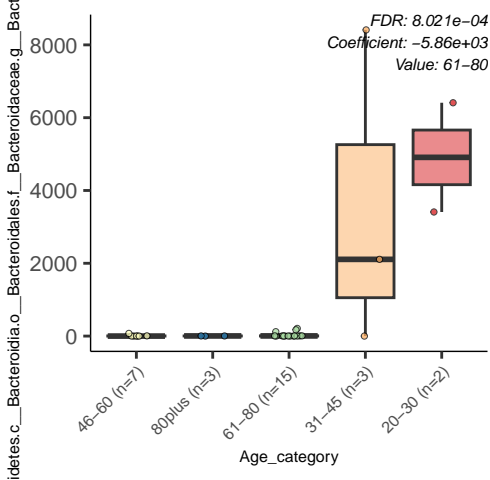

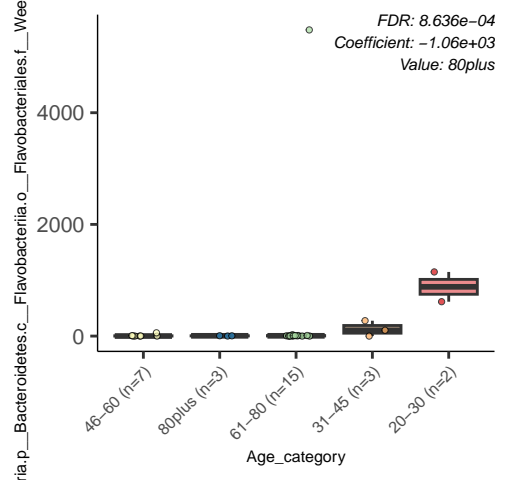

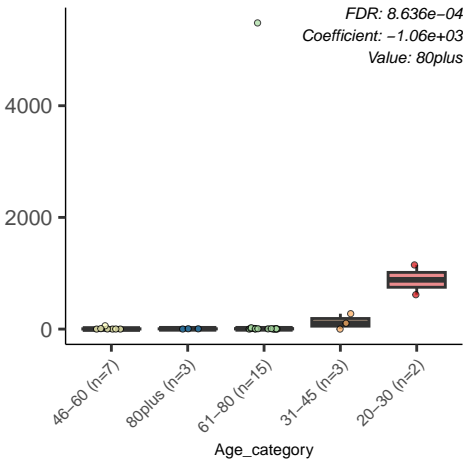



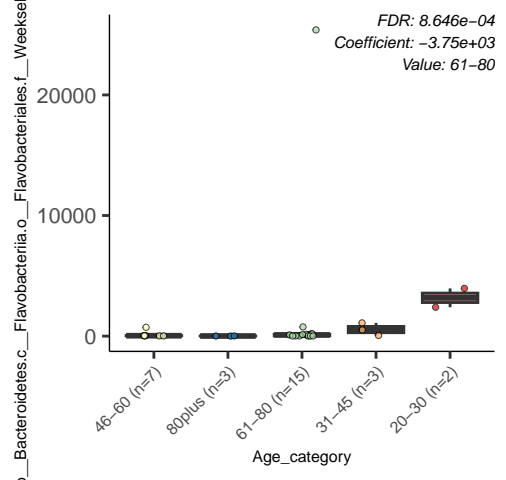

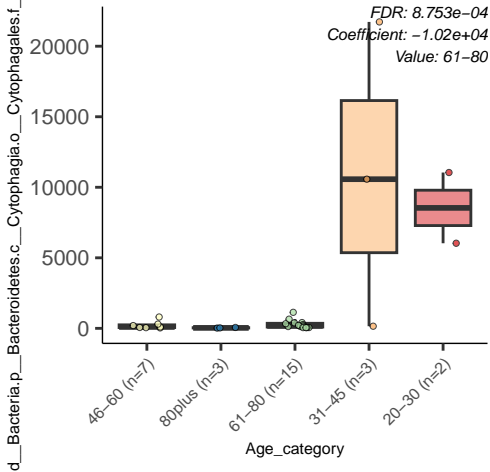

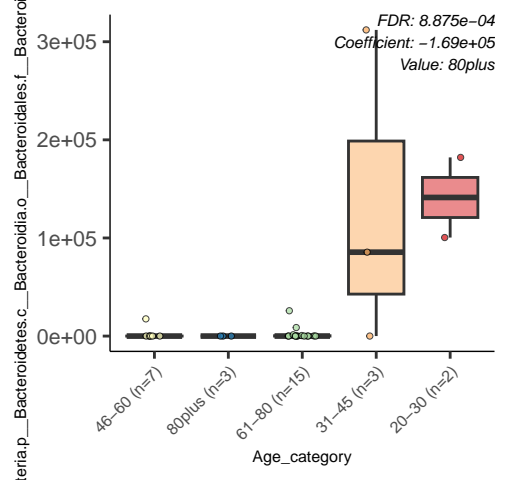

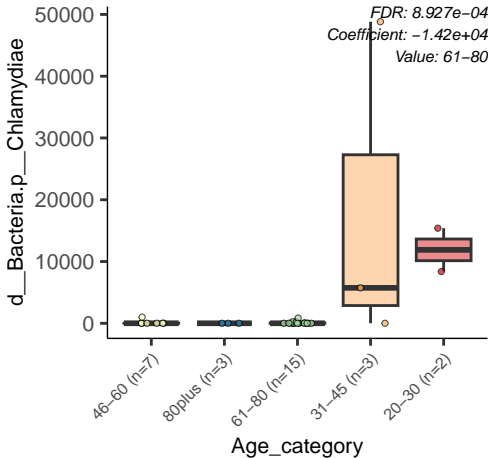

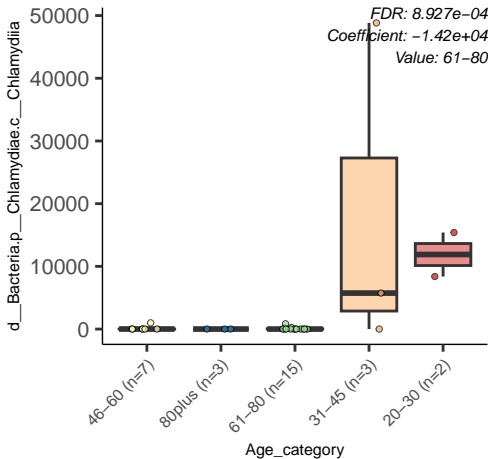

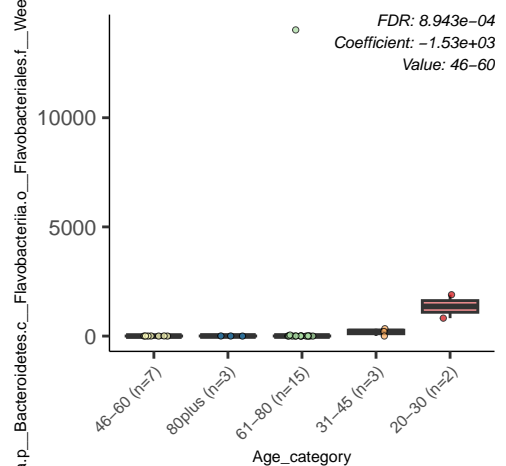

eroidetes.c\_\_Flavobacteriia.o\_\_Flavobacteriales.f\_\_Weeksellaceae,

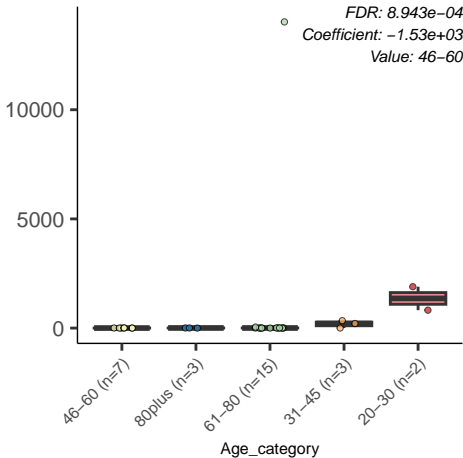

cteria.p\_\_Bacteroidetes.c\_\_Cytophagia.o\_\_Cytophagales.f\_\_Spiros

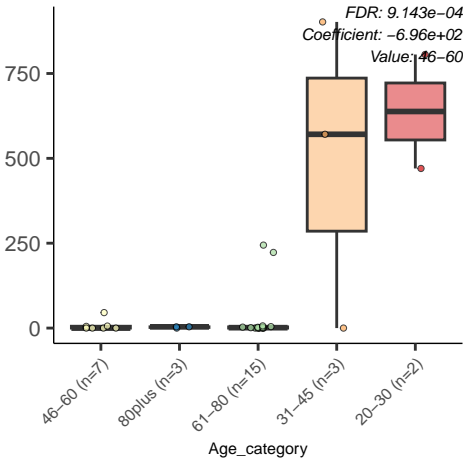



cteroidetes.c\_\_Cytophagia.o\_\_Cytophagales.f\_\_Spirosomaceae.g

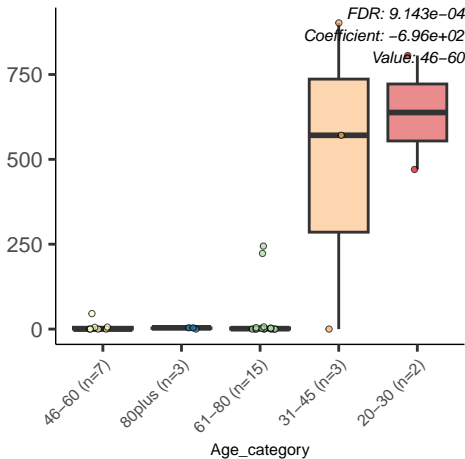

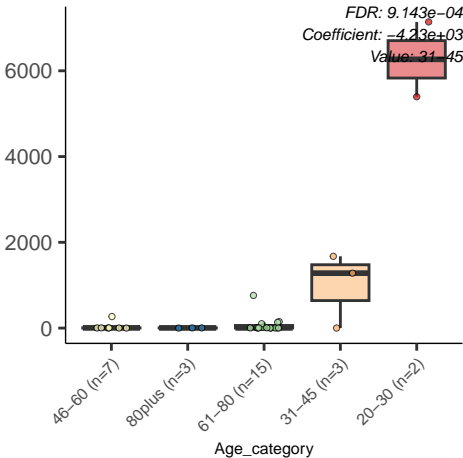

bacteria.p\_Actinobacteria.c\_Actinomycetia.o\_Corynebacteriales.

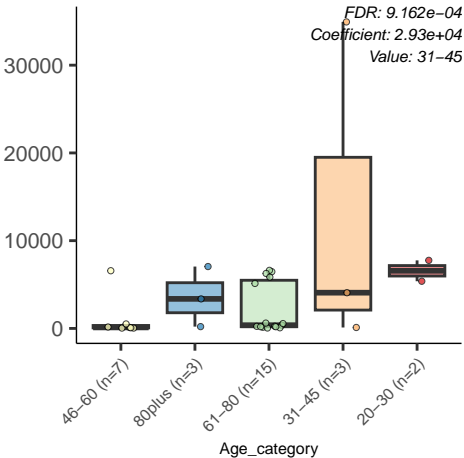

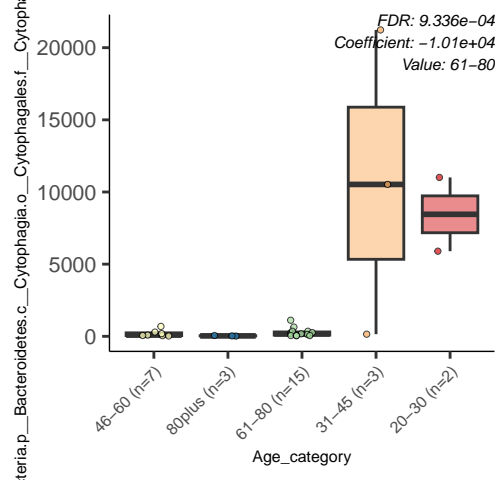

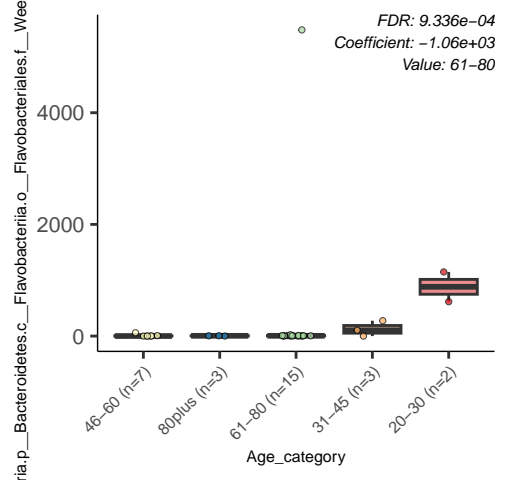

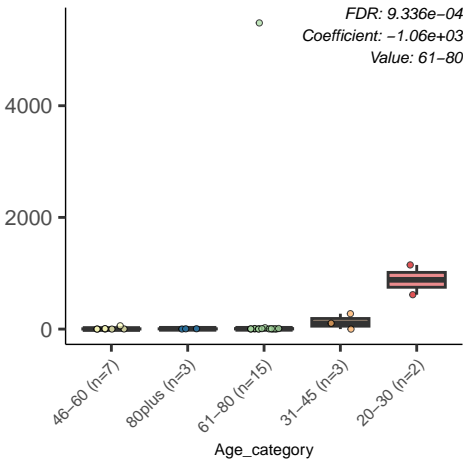

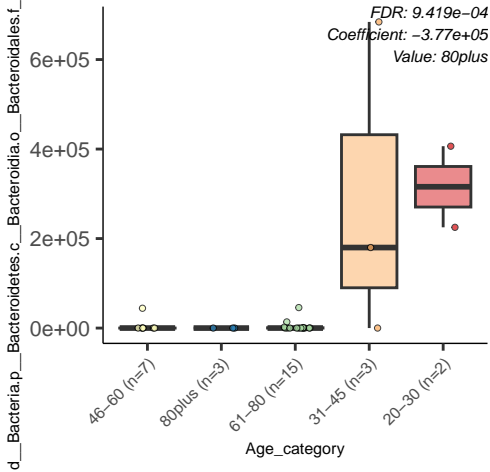

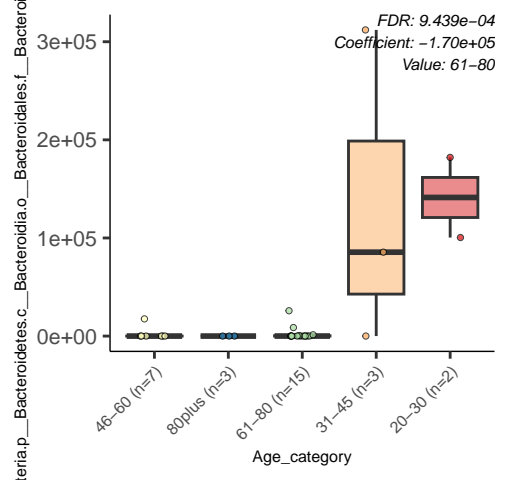



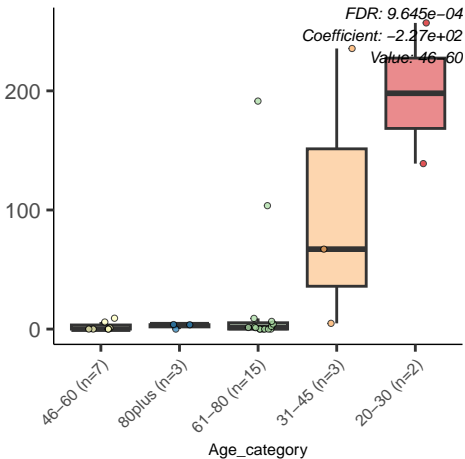

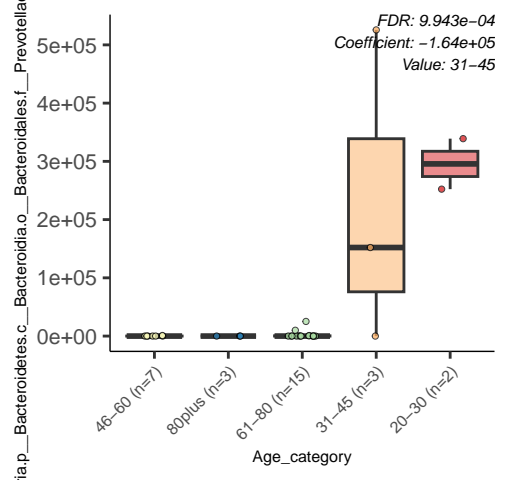

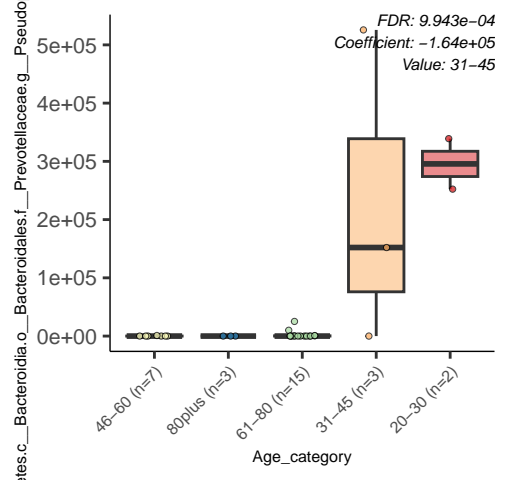

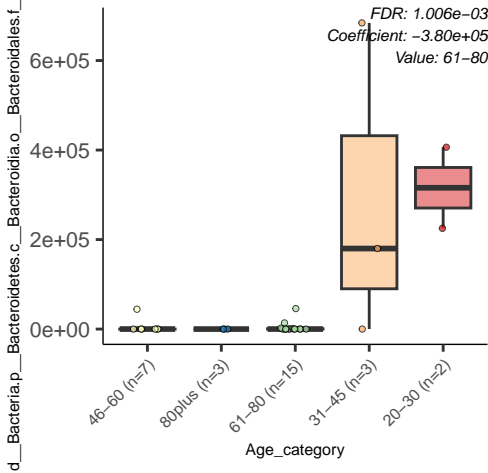

bacteria.c\_\_Actinomycetia.o\_\_Actinomycetales.f\_\_Actinomycetaceae.

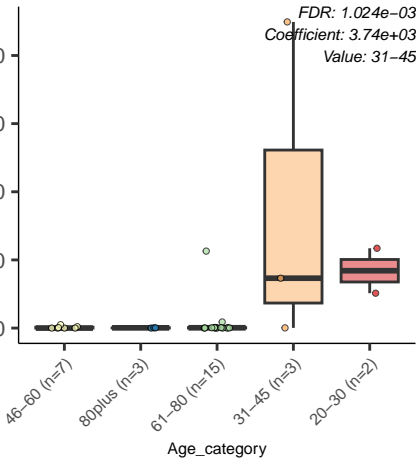

eria.p\_\_Bacteroidetes.c\_\_Bacteroidia.o\_\_Bacteroidales.f\_\_Barnesi

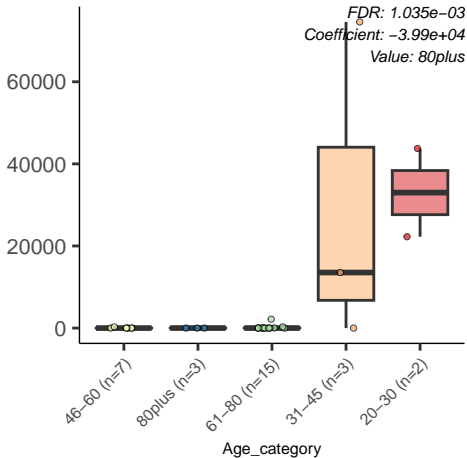

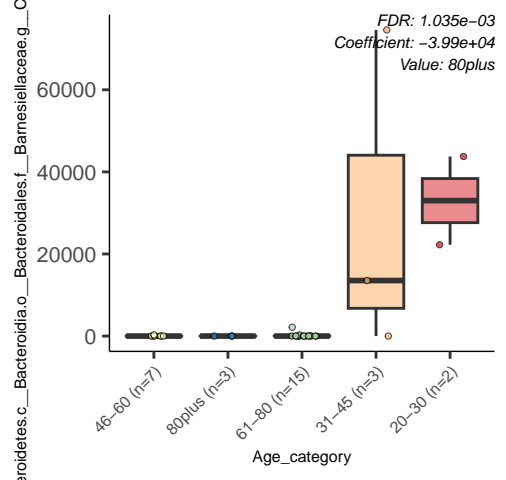

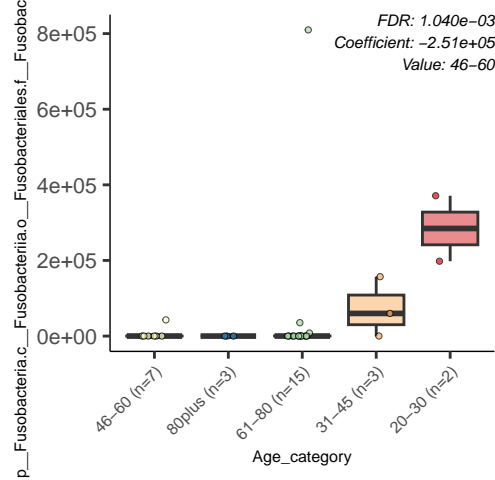



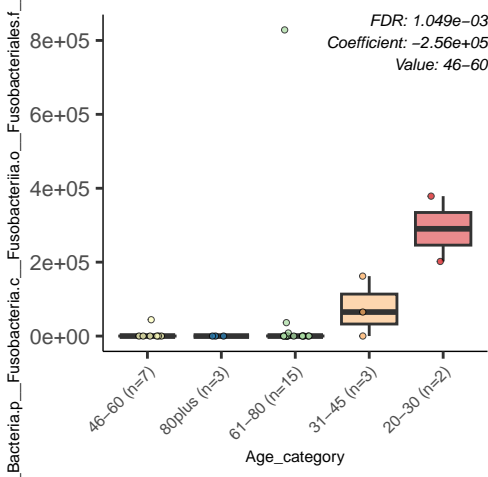

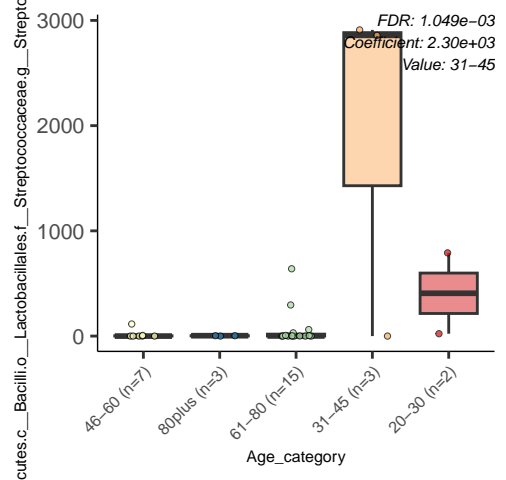

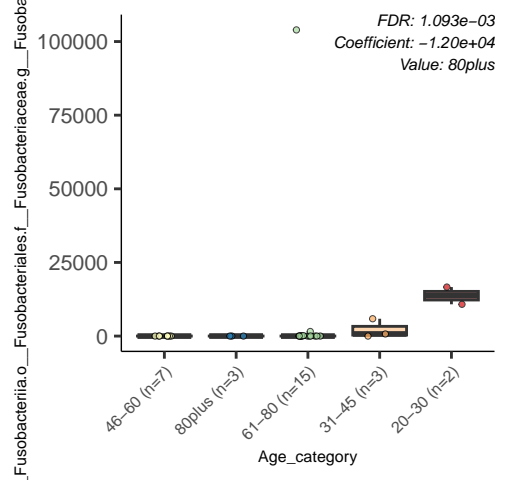

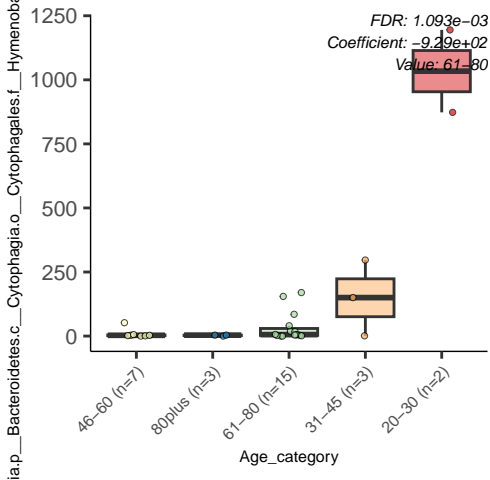

Bacteria.p\_Firmicutes.c\_Clostridia.o\_Eubacteriales.f\_Lachnosp

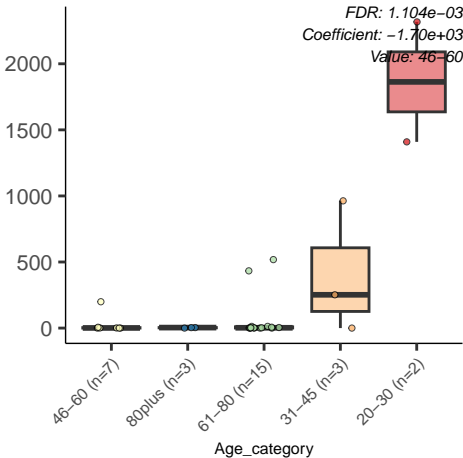

p\_\_Firmicutes.c\_\_Clostridia.o\_\_Eubacteriales.f\_\_Lachnospiraceae.g\_\_

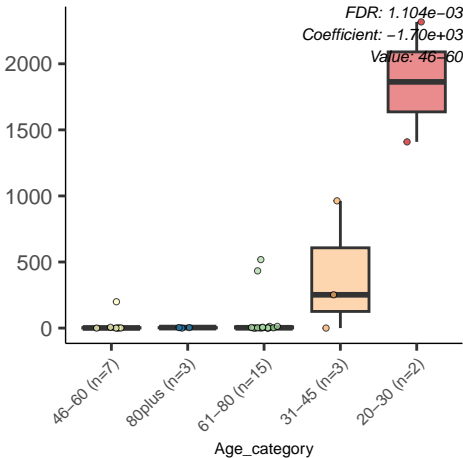

FDR: 1.110e-03  
Coefficient: 2.93e+02  
Value: 31-45

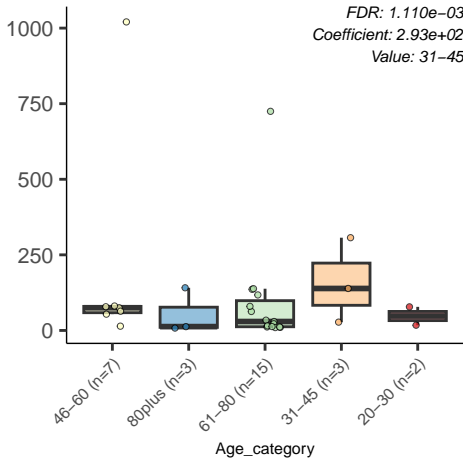

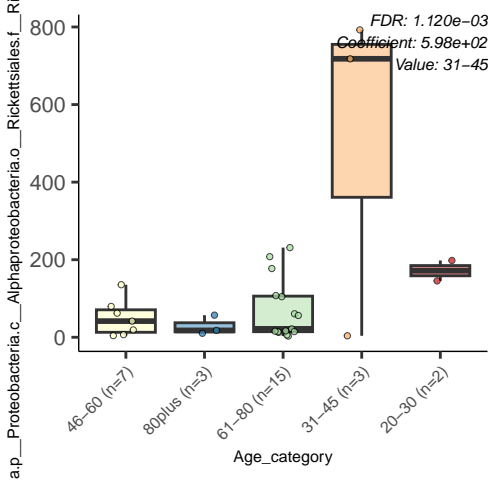



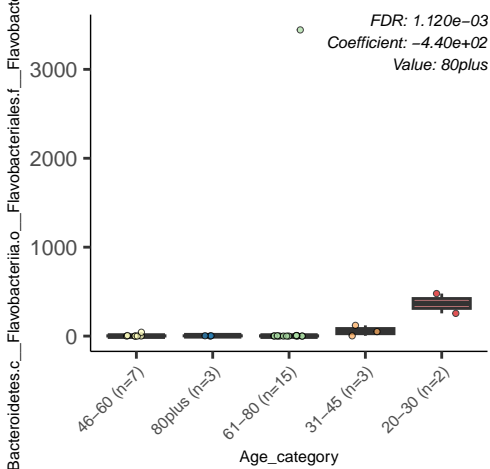

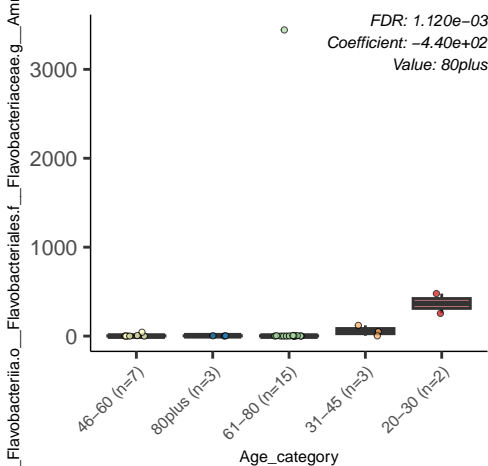

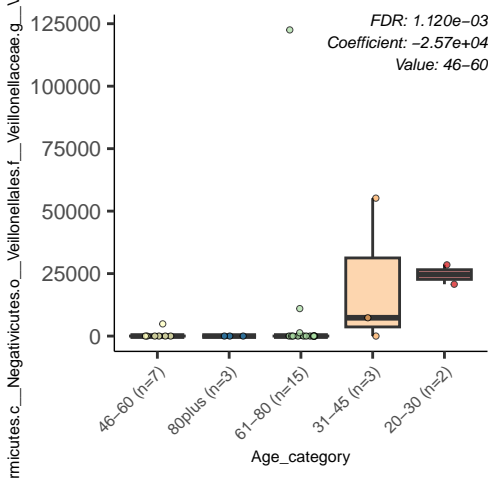

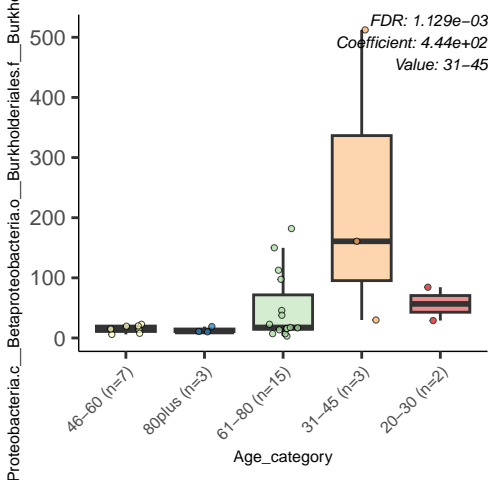

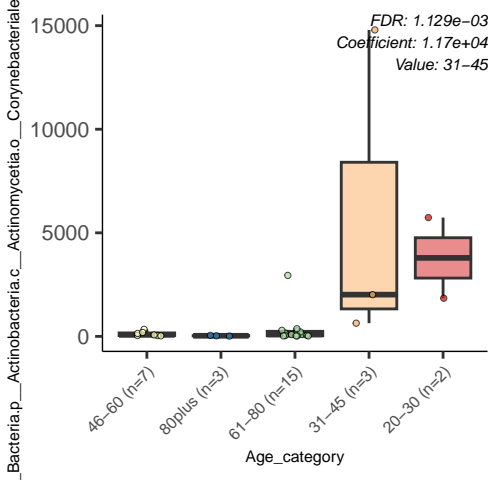

eria.p\_\_Bacteroidetes.c\_\_Bacteroidia.o\_\_Bacteroidales.f\_\_Barnesi

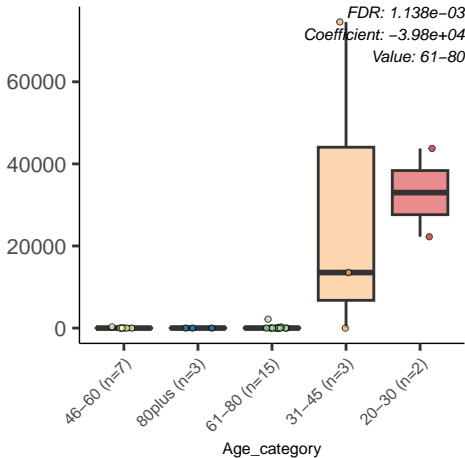

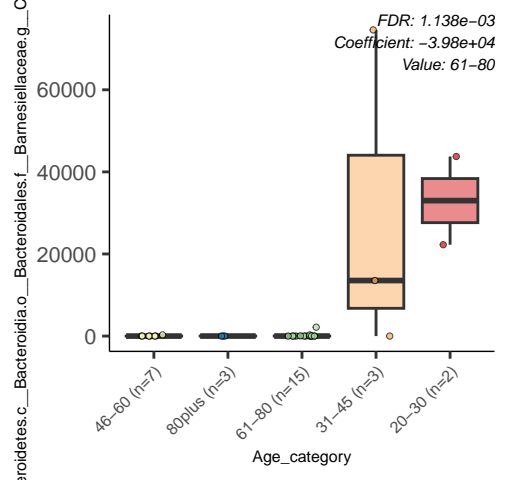

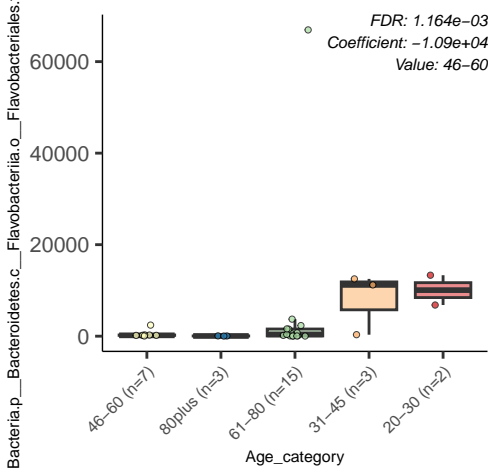



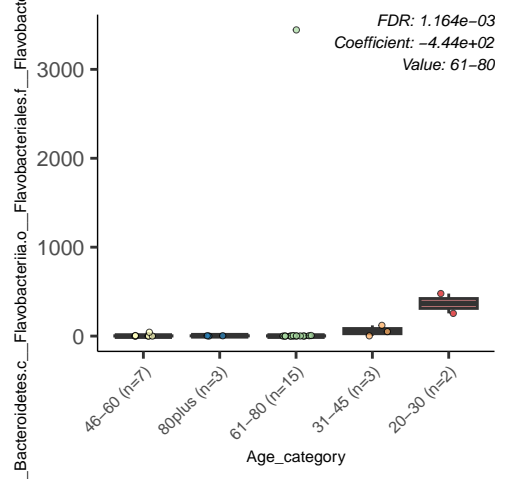

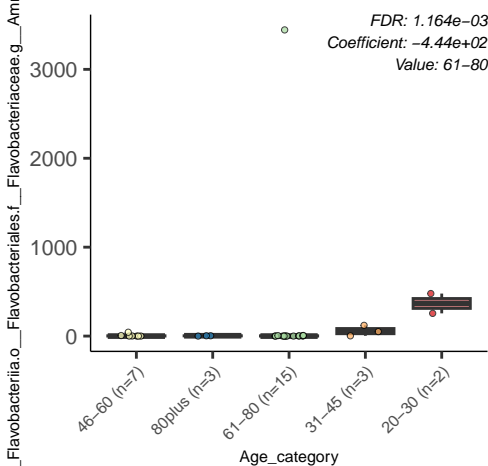

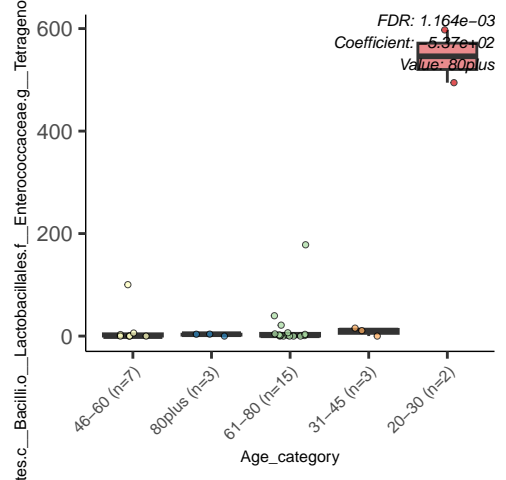

acteria.c\_\_Actinomycetia.o\_\_Actinomycetales.f\_\_Actinomycetaceae.g\_\_

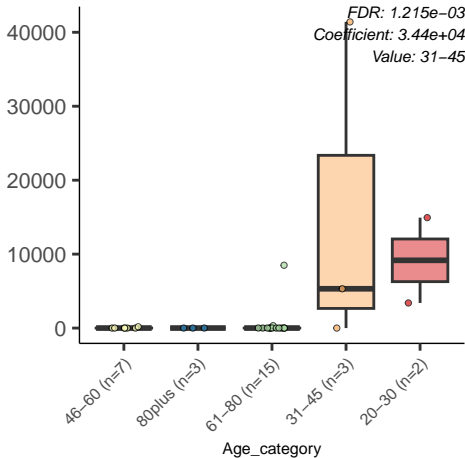

d\_Bacteria.p\_Fusobacteria

0e+00

5e+05

1e+06

46-60 (n=7)

80plus (n=3)

61-80 (n=15)

31-45 (n=3)

20-30 (n=2)

Age\_category

FDR: 1.295e-03  
Coefficient: -7.65e+05  
Value: 31-45

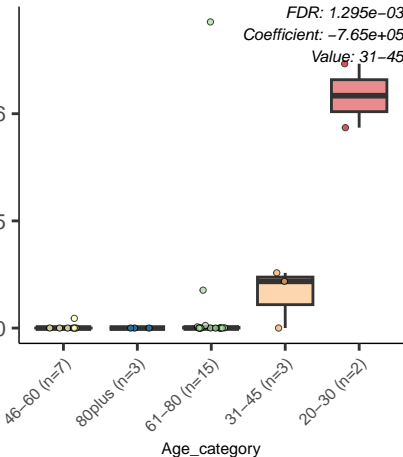

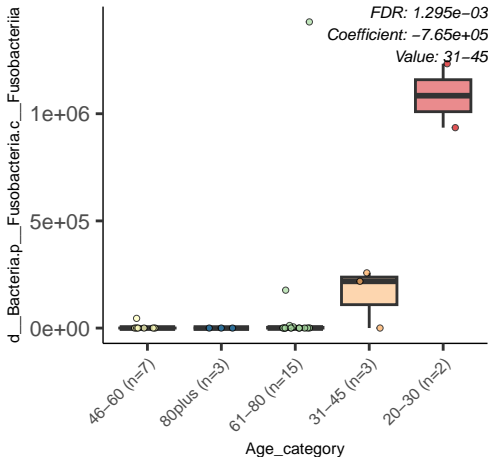

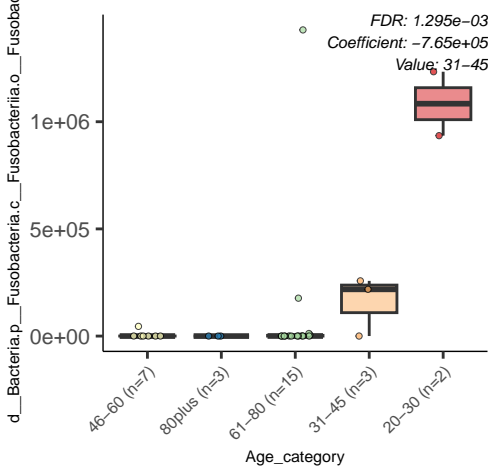

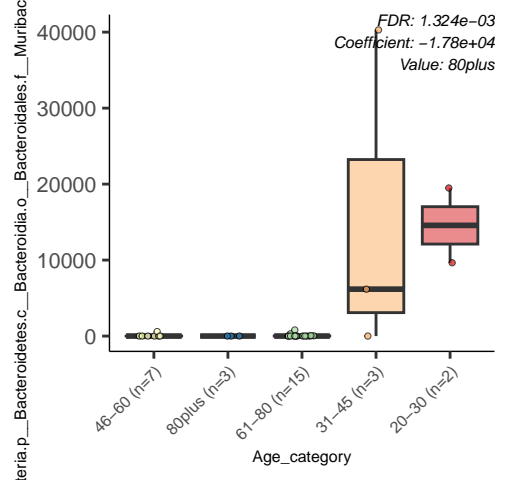



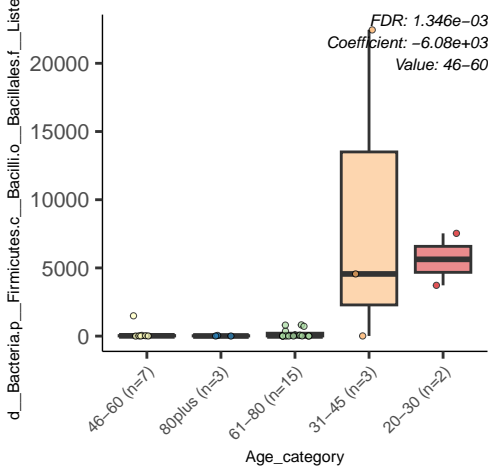

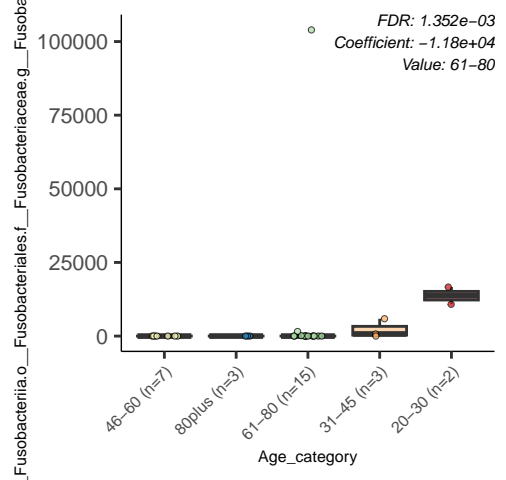

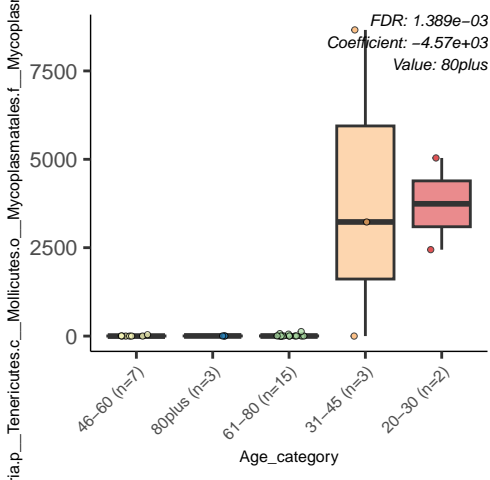

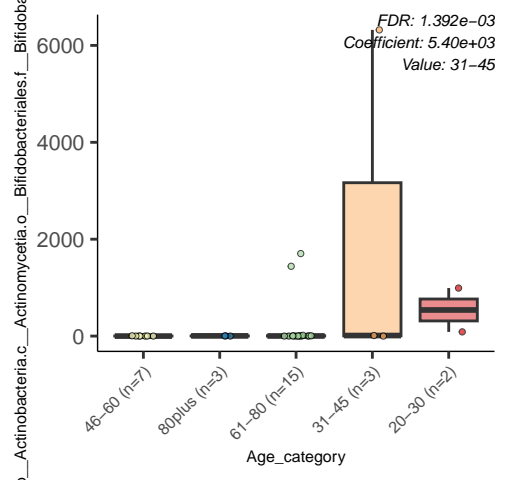

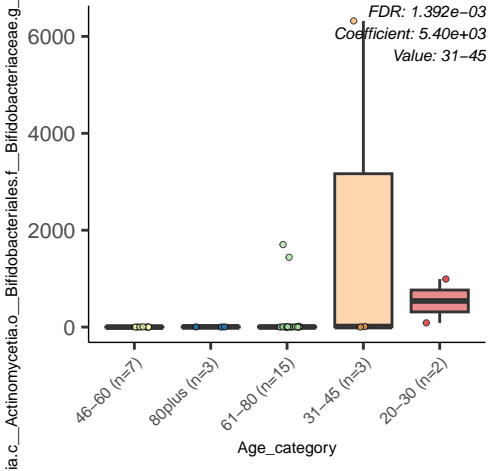

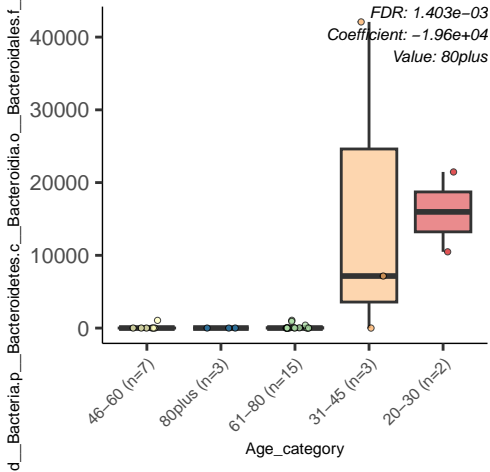

Epsilonproteobacteria.o\_\_Campylobacterales.f\_\_Campylobacter

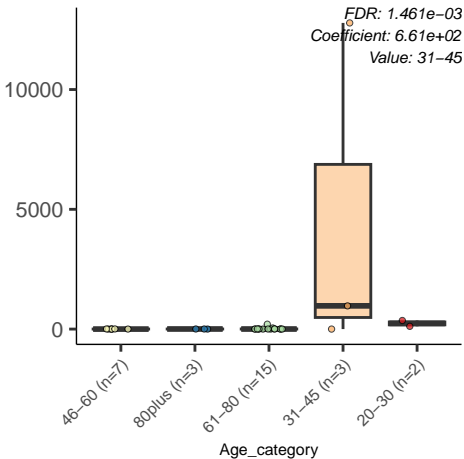

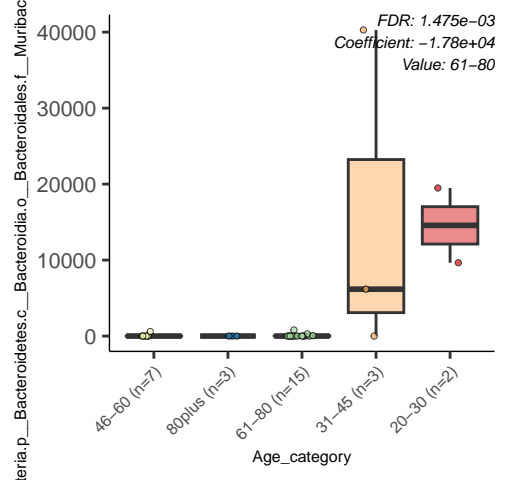



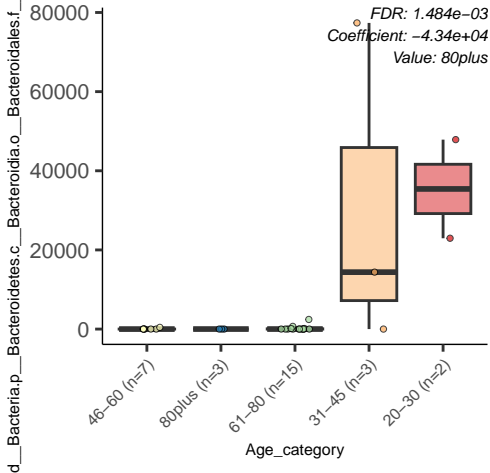

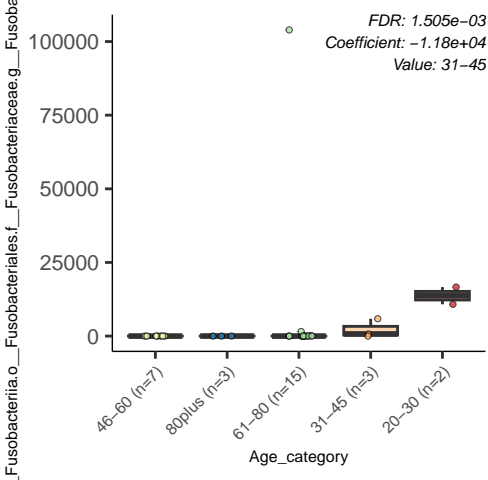

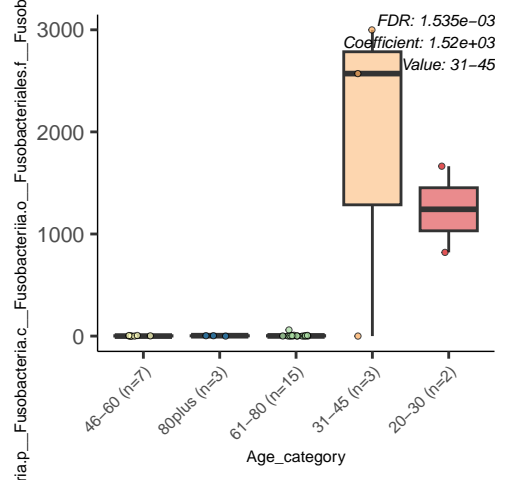

bacteria.c\_\_Fusobacteriia.o\_\_Fusobacteriales.f\_\_Fusobacteriaceae.

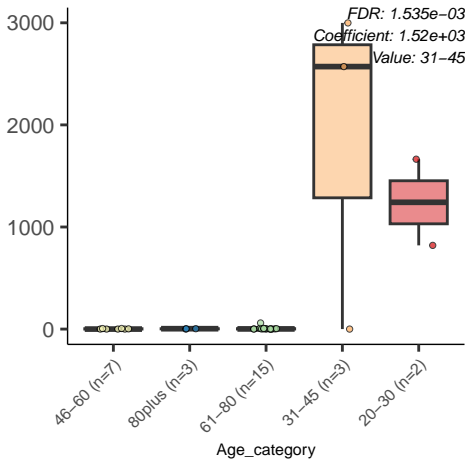

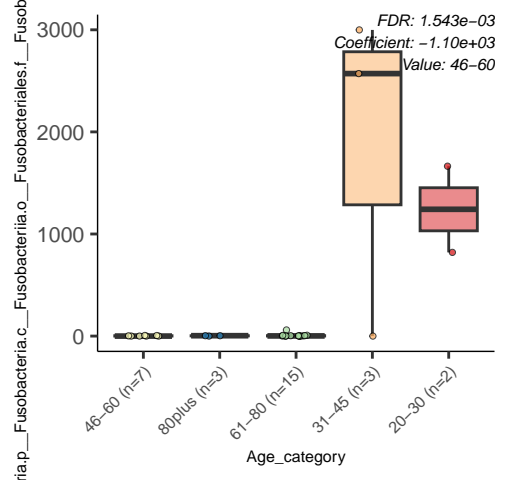

bacteria.c\_\_Fusobacteriia.o\_\_Fusobacteriales.f\_\_Fusobacteriaceae.

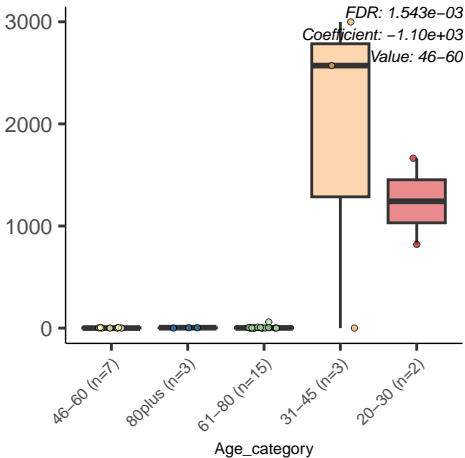

ia.p\_\_Tenericutes.c\_\_Mollicutes.o\_\_Mycoplasmatales.f\_\_Mycoplas

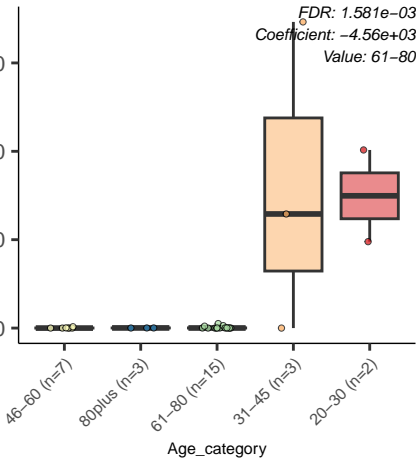

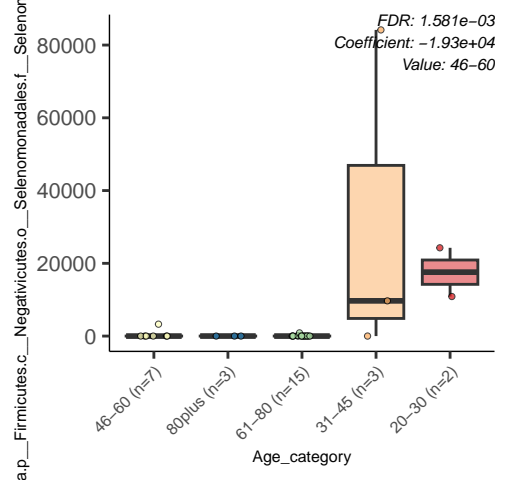



tes.c\_\_Negativicutes.o\_\_Selenomonadales.f\_\_Selenomonadaceae.g\_\_

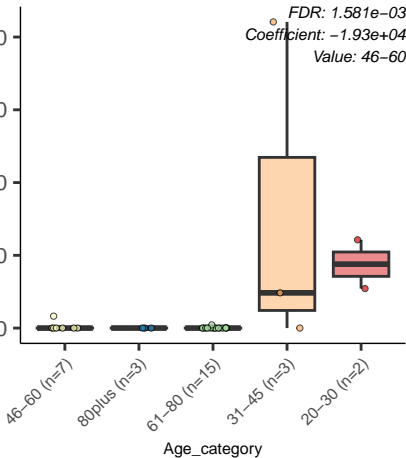

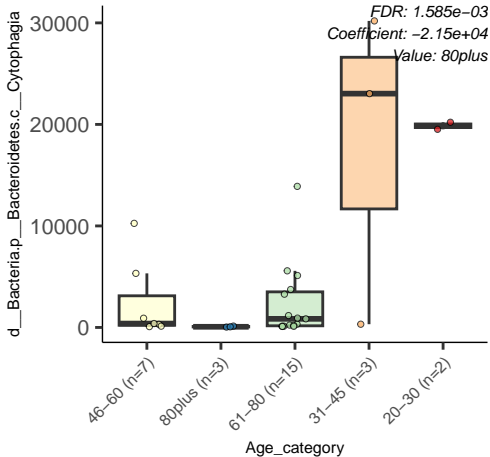

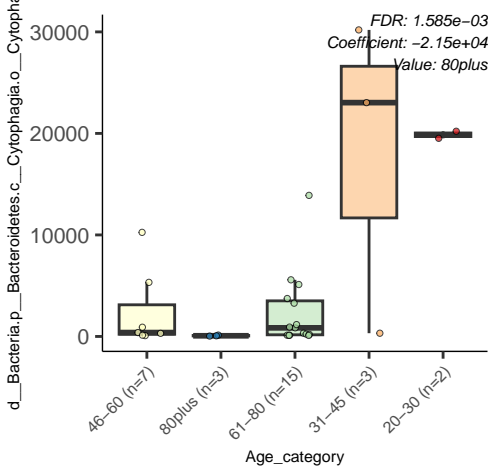

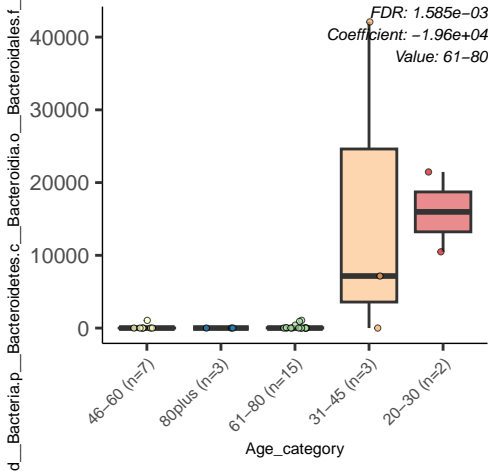

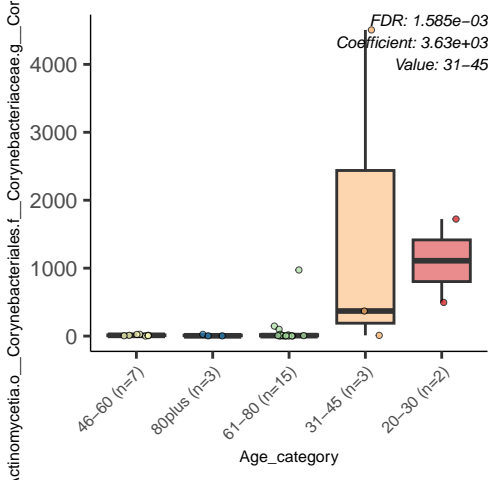

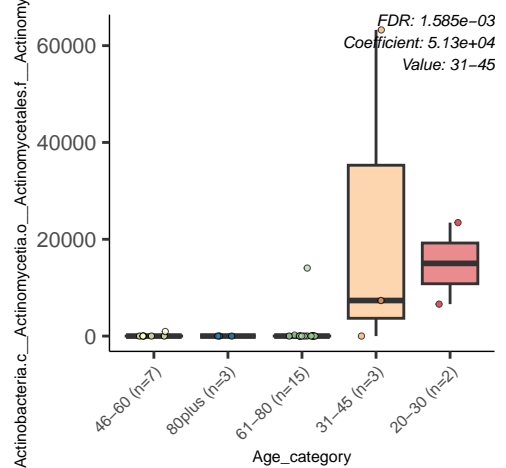

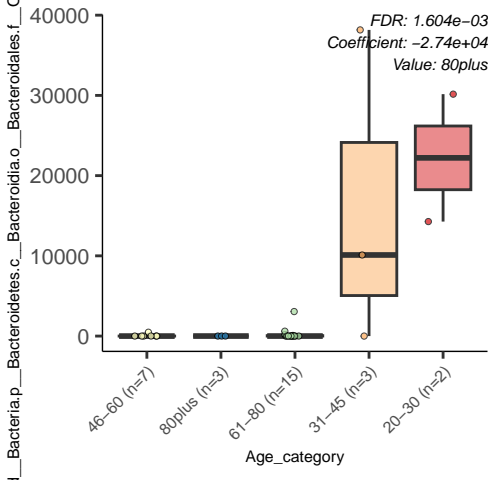

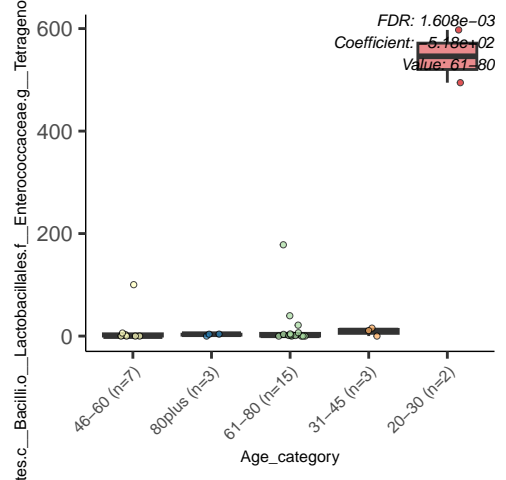



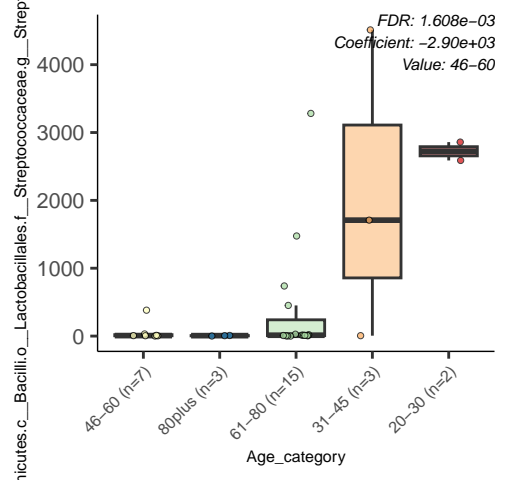

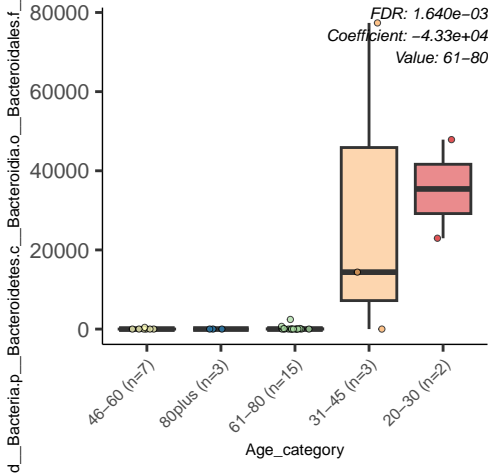

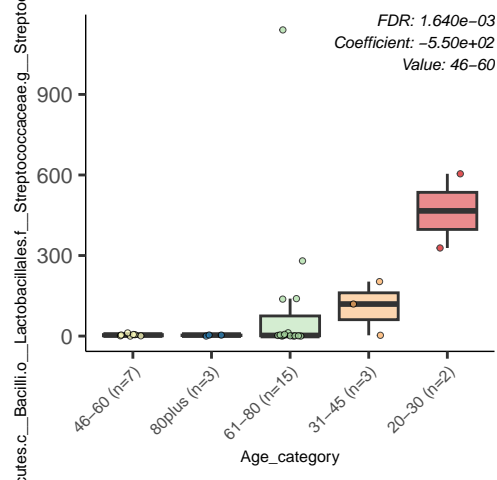

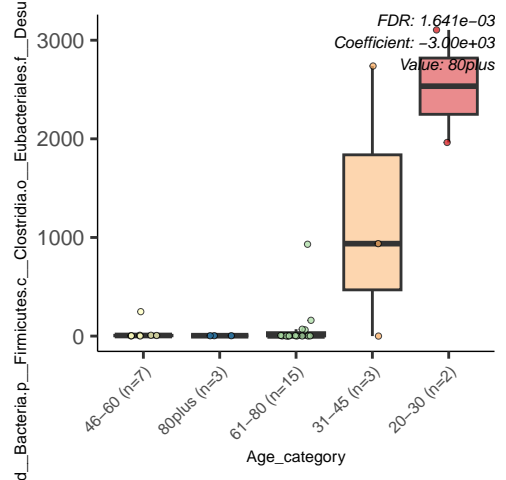

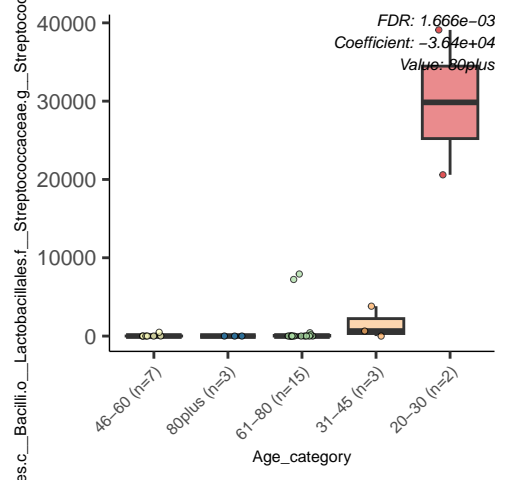

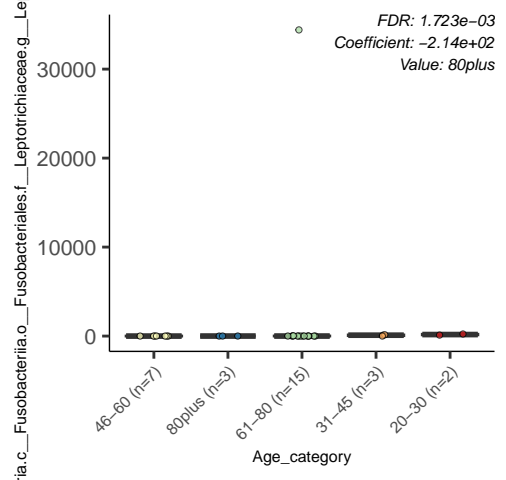

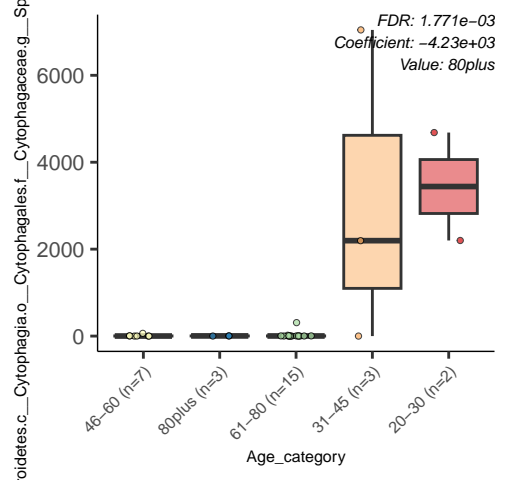

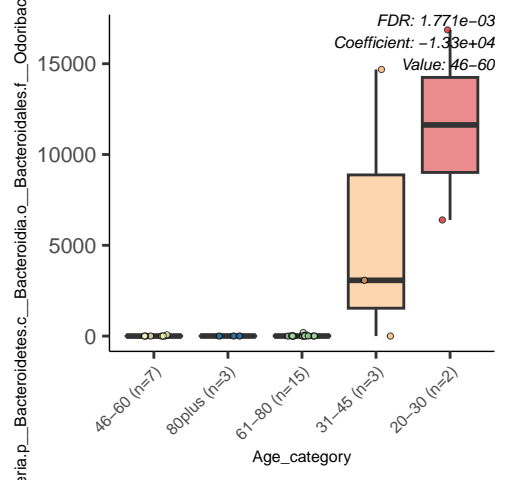



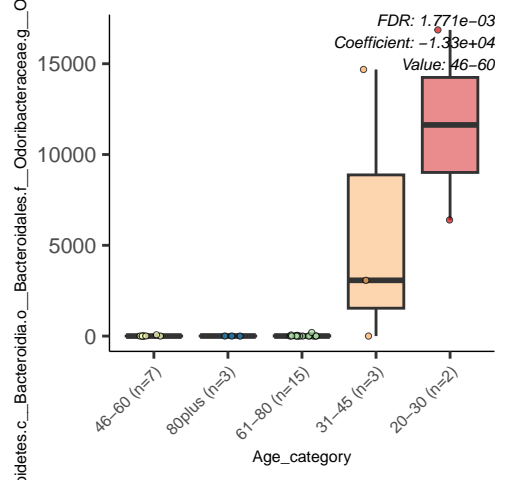



acteria.c\_Actinomycetia.o\_Actinomycetales.f\_Actinomycetaceae

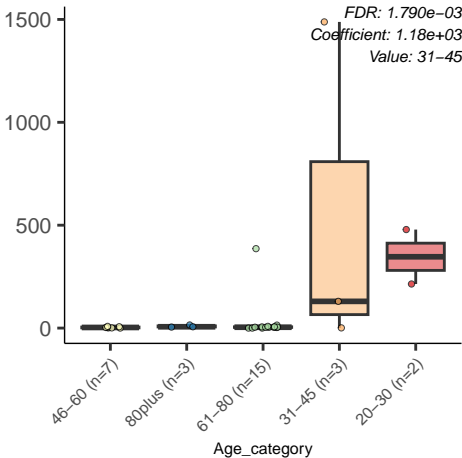

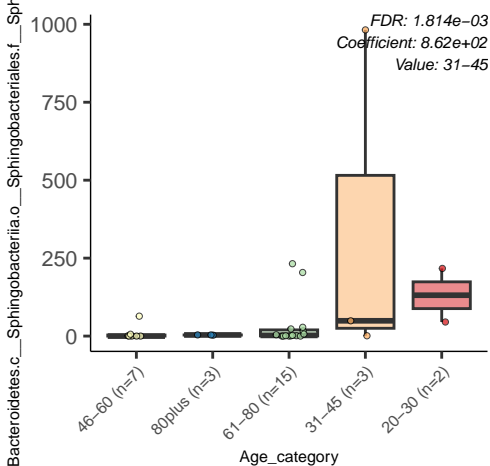

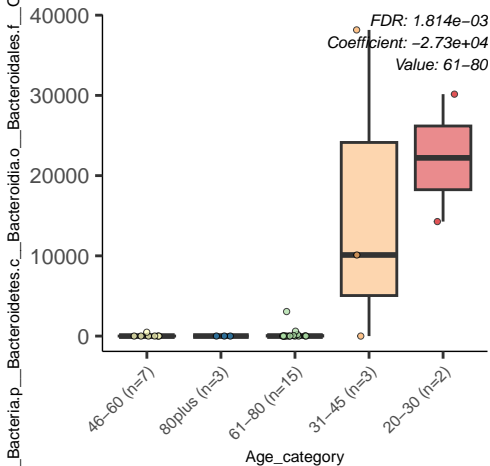

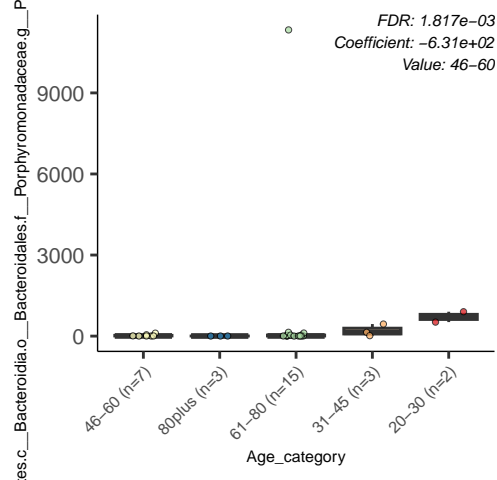

Bacteria.p\_\_Proteobacteria.c\_\_Alphaproteobacteria.o\_\_Rickettsiales

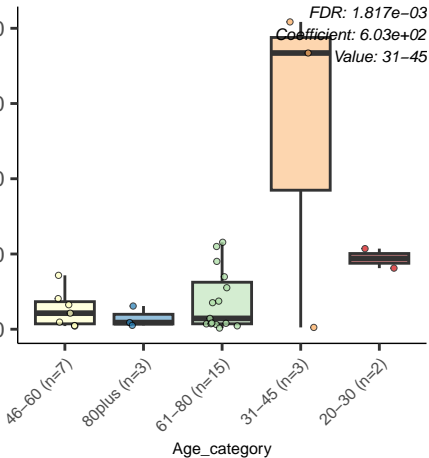

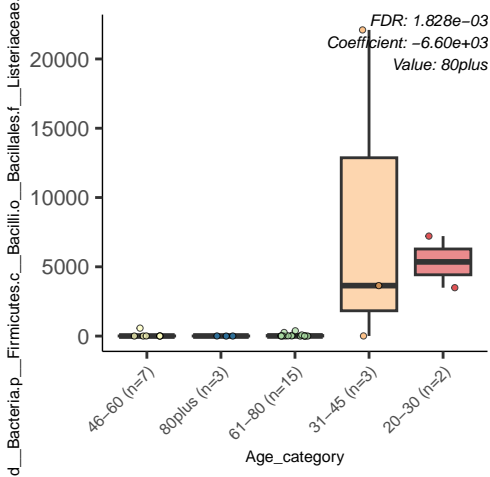



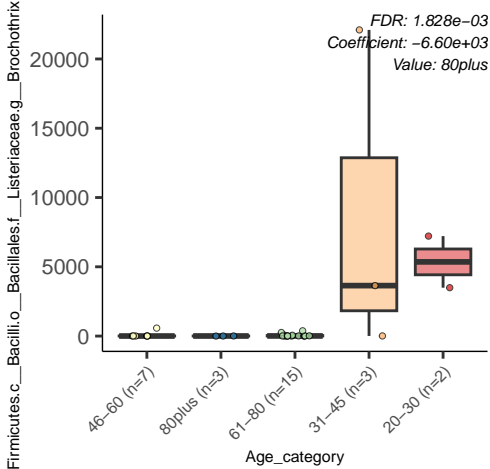

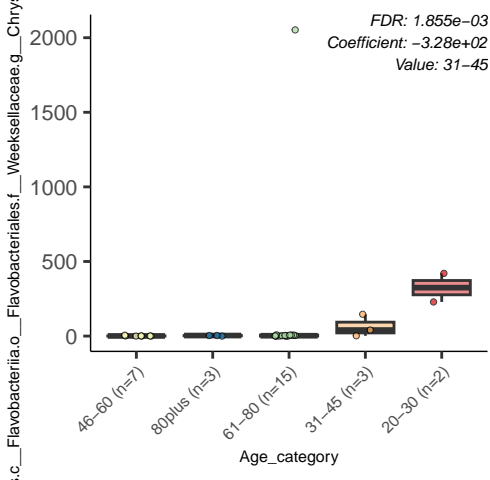

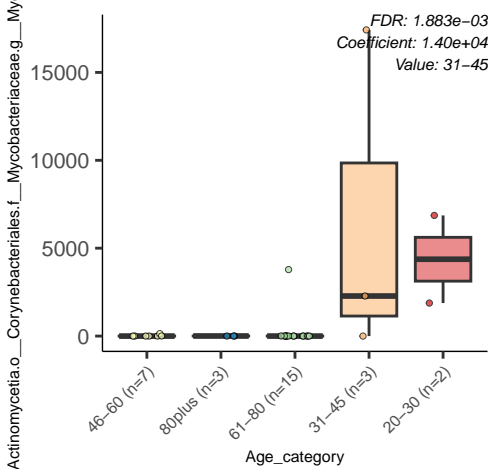

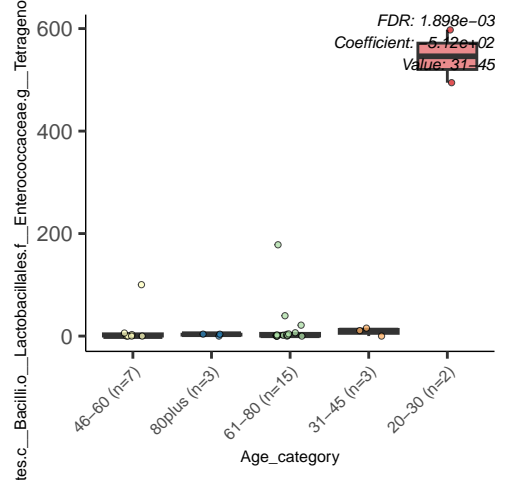

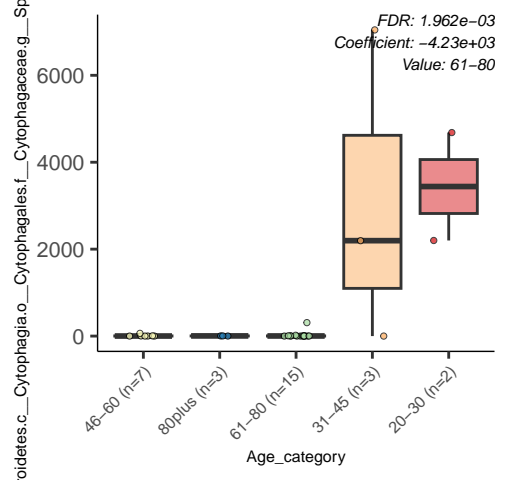

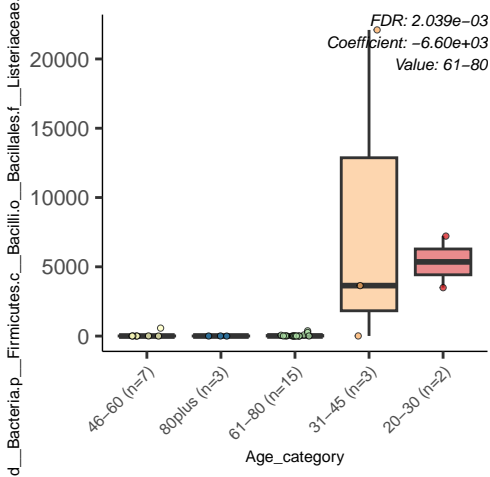

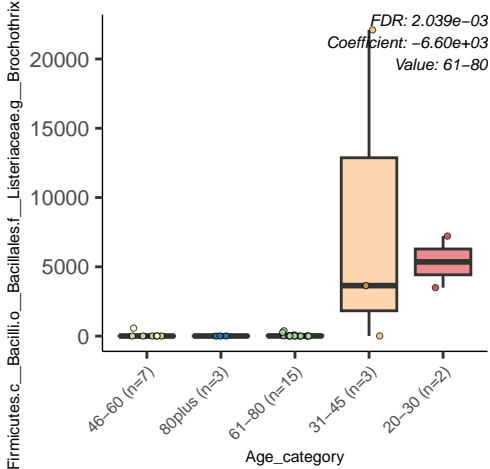

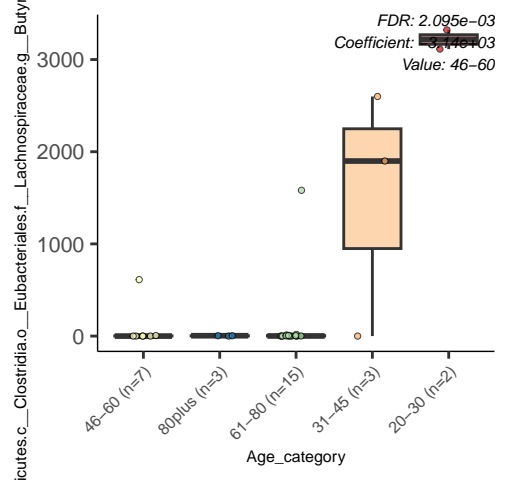



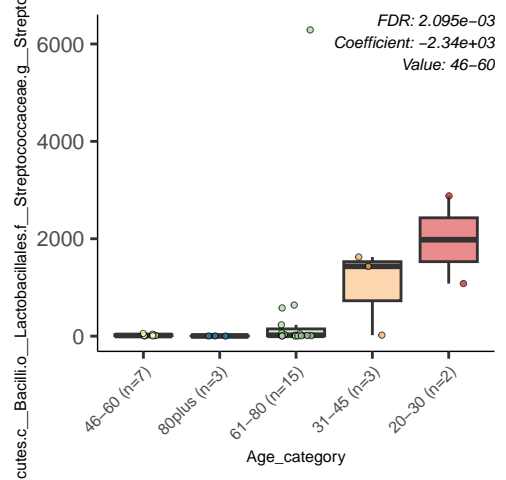

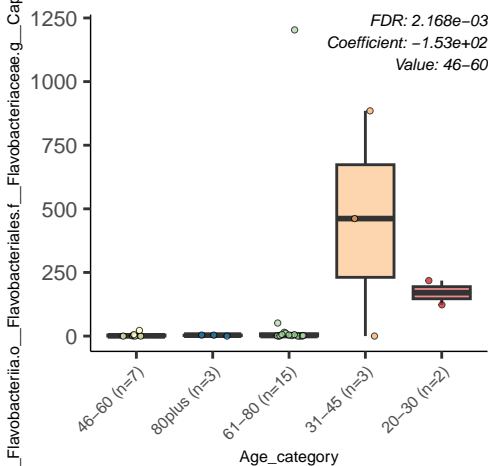

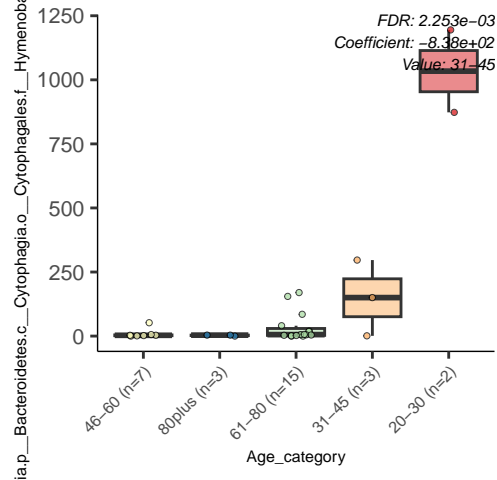

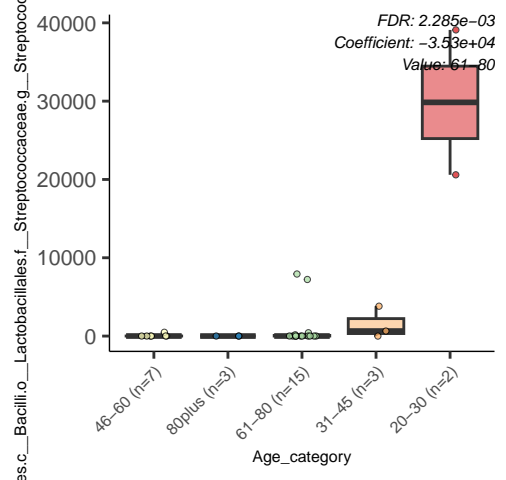

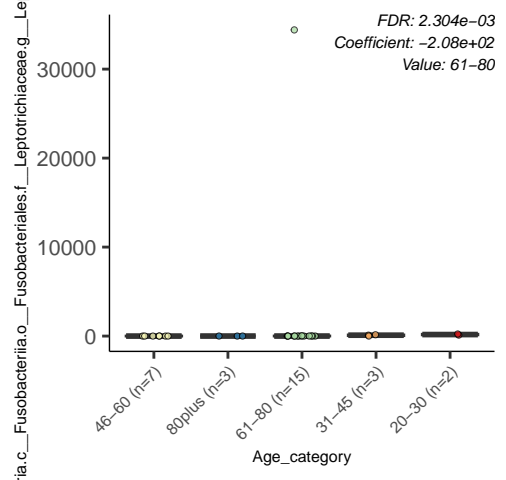

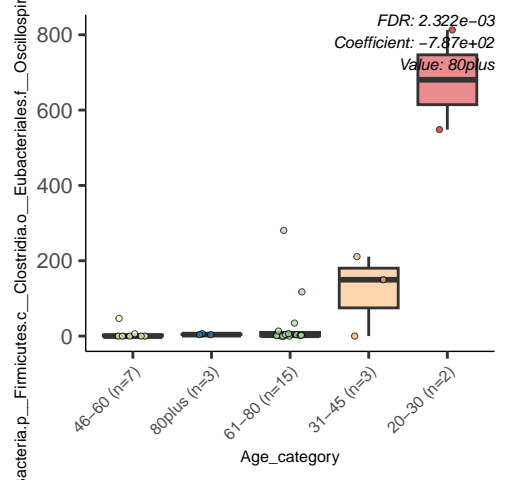

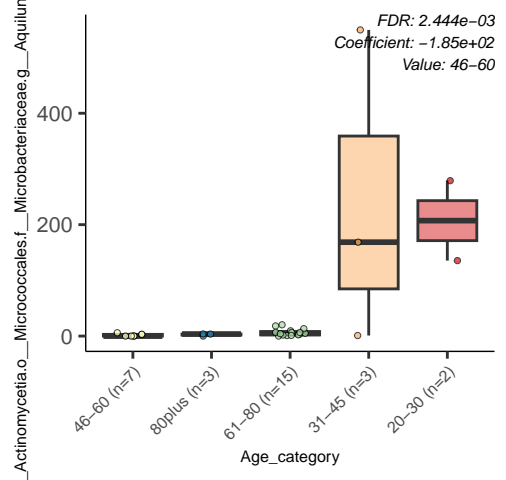

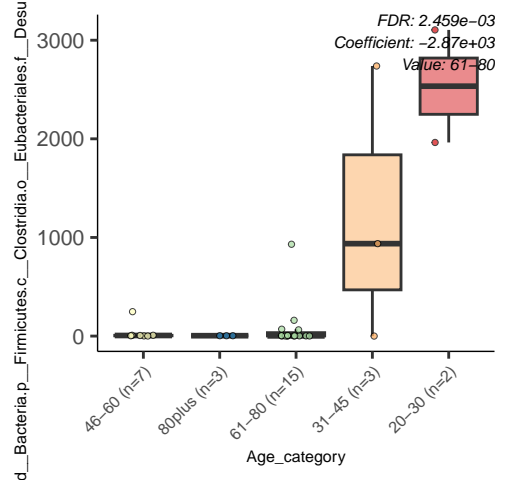



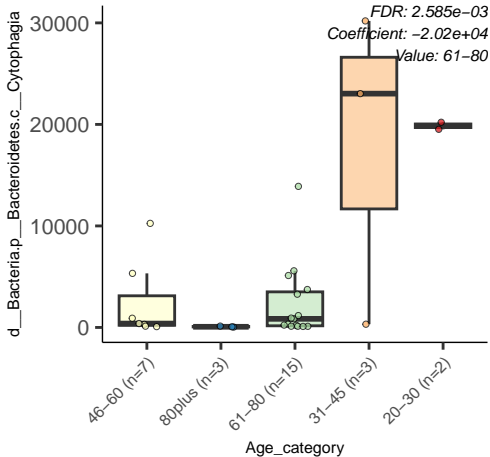

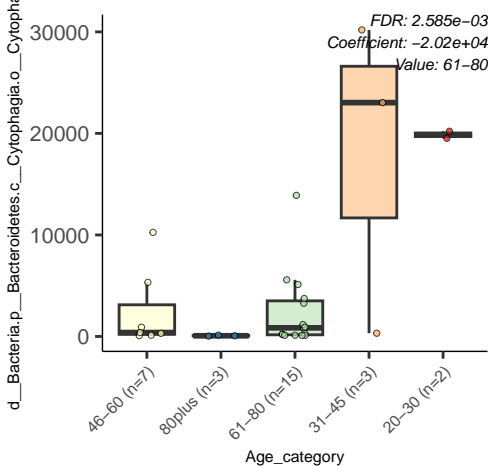

Actinobacteria.c\_Actinomyces.o\_Pseudonocardiales.f\_Pseudonocardia.g\_Pseudonocardia.s\_Pseudonocardia

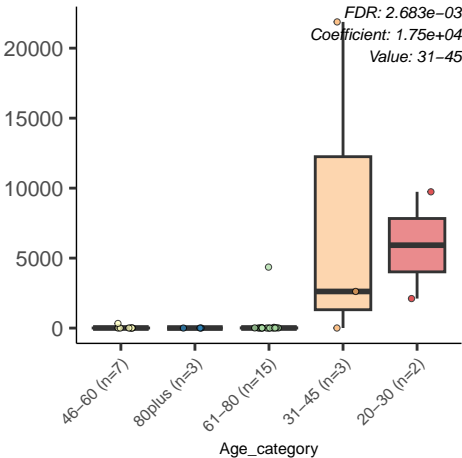

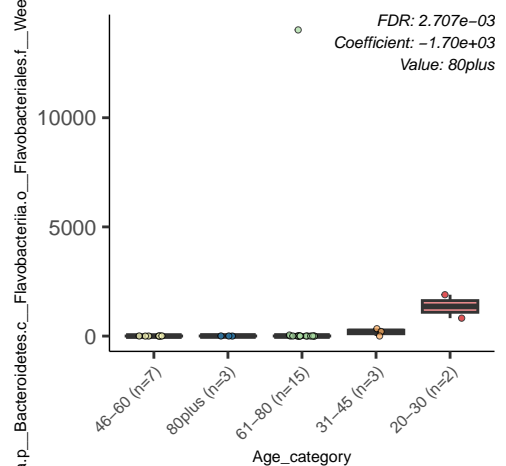

eroidetes.c\_\_Flavobacteriia.o\_\_Flavobacteriales.f\_\_Weeksellaceae,

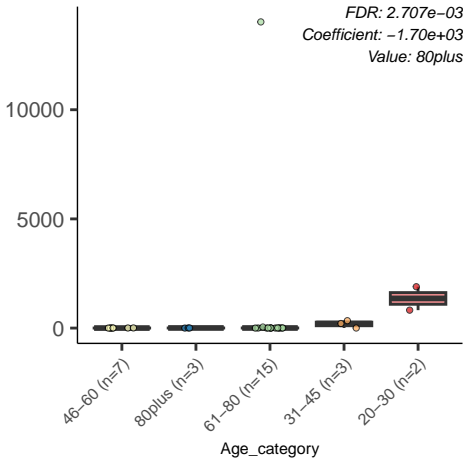

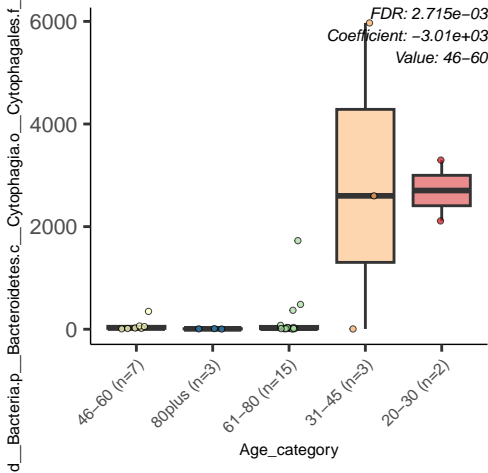

acteria.p\_\_Bacteroidetes.c\_\_Cytophagia.o\_\_Cytophagales.f\_\_Spiros

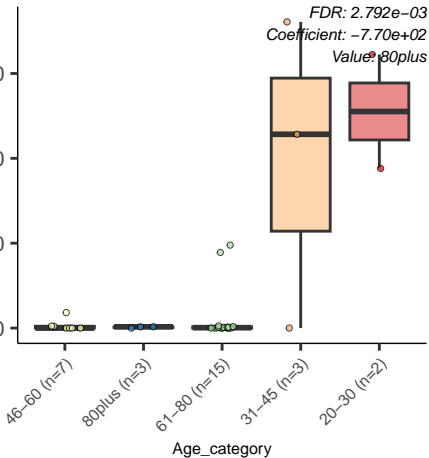

cteroideetes.c\_\_Cytophagia.o\_\_Cytophagales.f\_\_Spirosomaceae.g

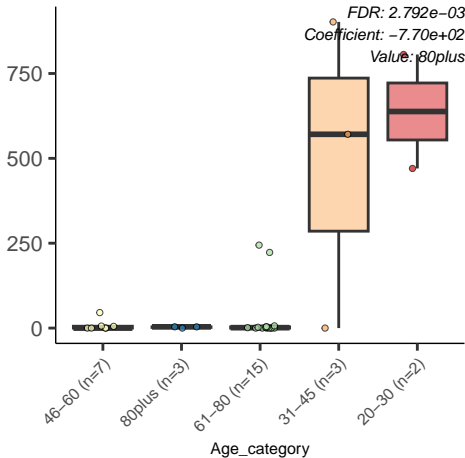



Bacteria.p\_\_Bacteroidetes.c\_\_Flavobacteriia.o\_\_Flavobacteriales.

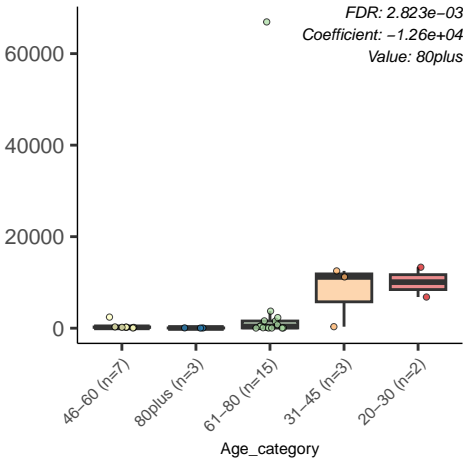

d\_Bacteria.p\_Cyanobacteria

FDR: 2.860e-03  
Coefficient: 3.52e+04  
Value: 31-45

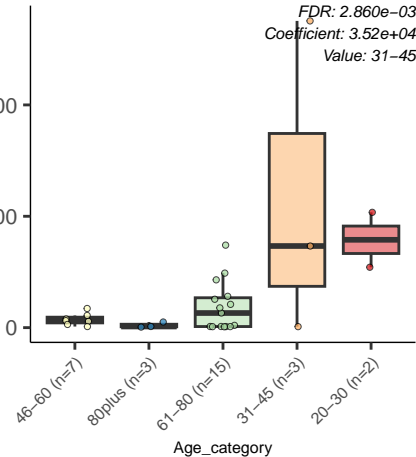

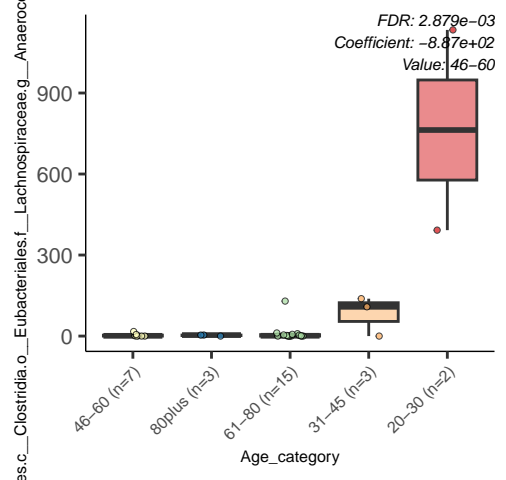

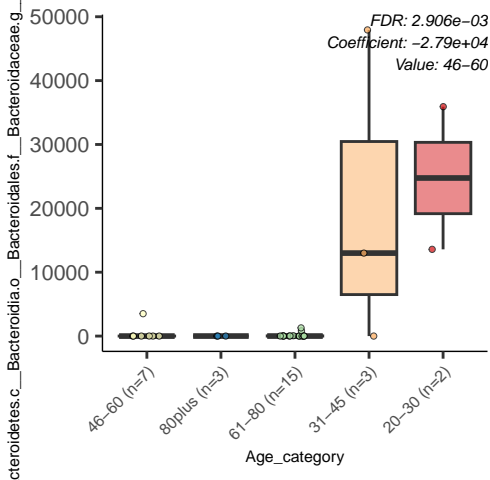

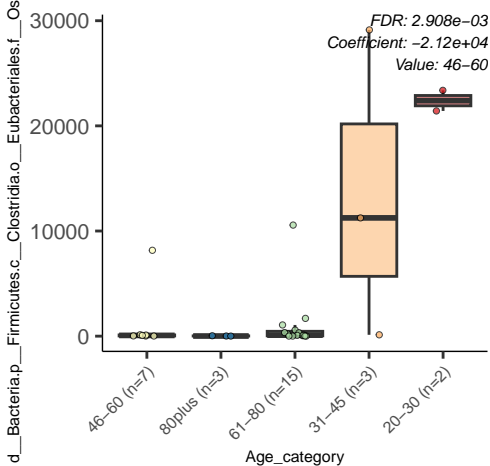

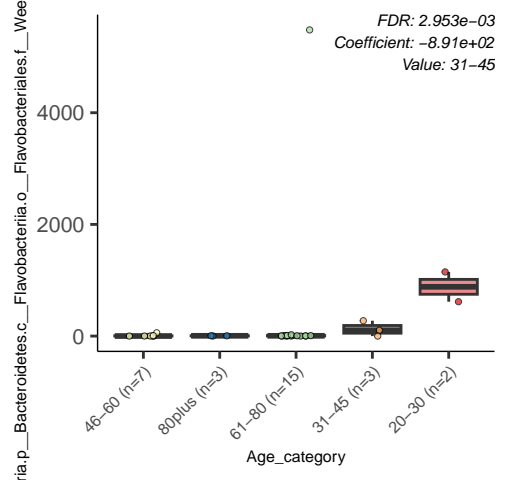

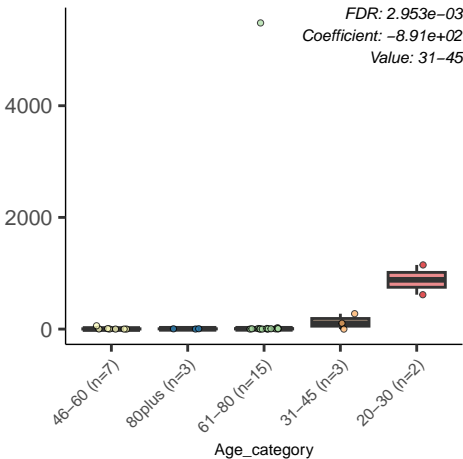

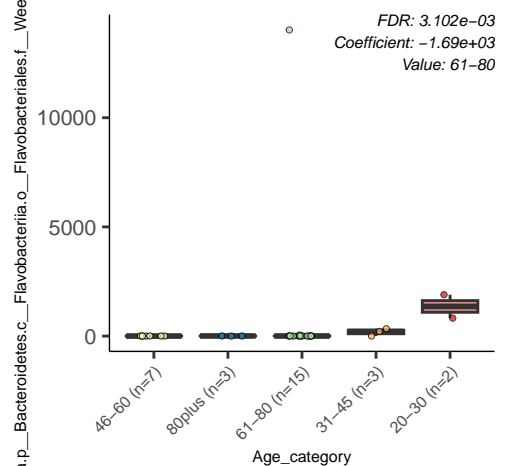



eroidetes.c\_\_Flavobacteriia.o\_\_Flavobacteriales.f\_\_Weeksellaceae,

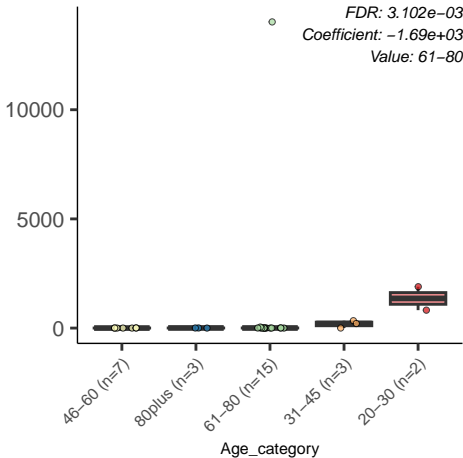

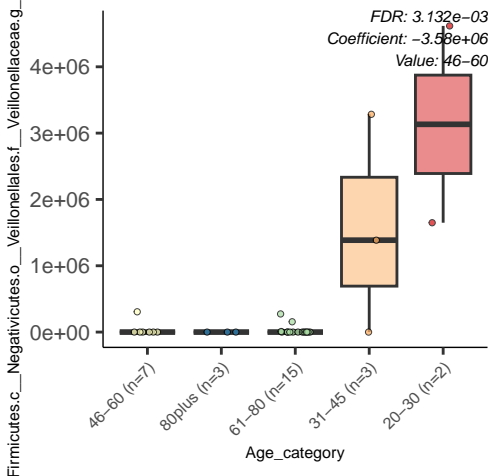

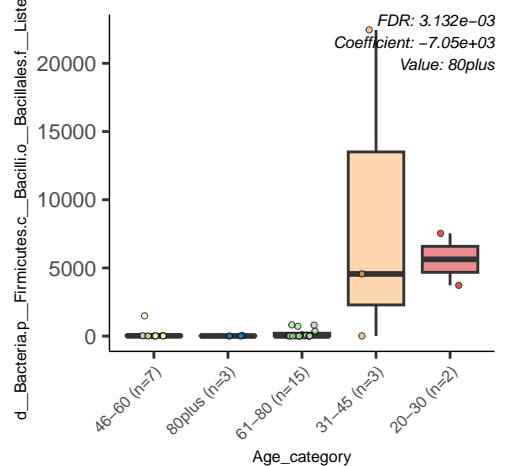

cut.es.c\_\_Bacilli.o\_\_Lactobacillales.f\_\_Streptococcaceae.g\_\_Strepto

15000  
10000  
5000  
0

46-60 (n=7)

80plus (n=3)

61-80 (n=15)

31-45 (n=3)

20-30 (n=2)

Age\_category

*FDR: 3.132e-03*  
*Coefficient: -1.34e+04*  
*Value: 46-60*

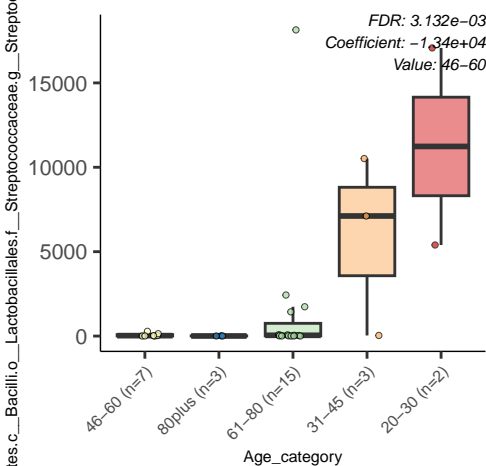

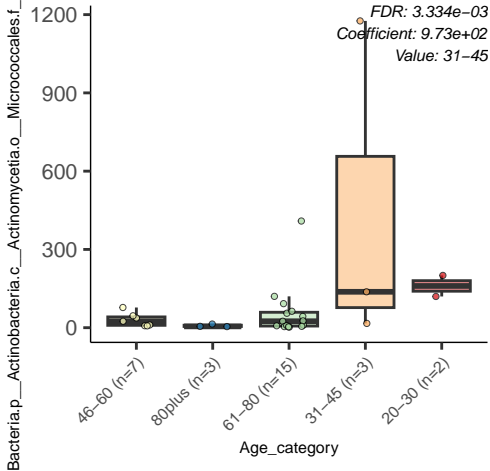

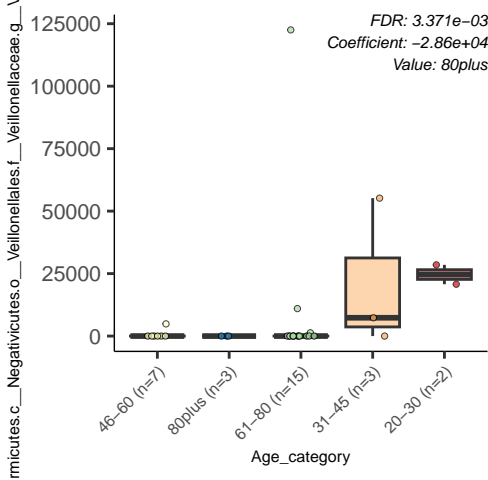

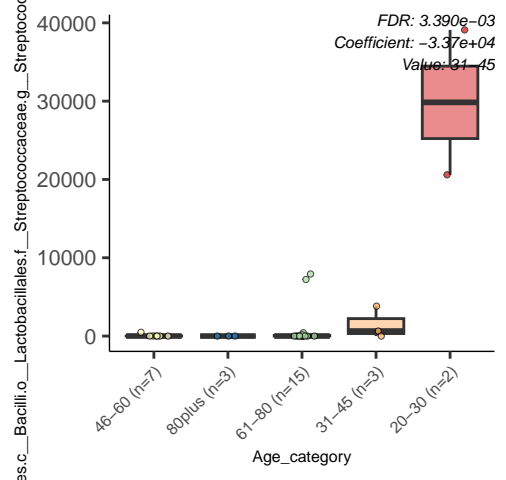

cteria.c\_Actinomycetia.o\_Actinomycetales.f\_Actinomycetaceae.

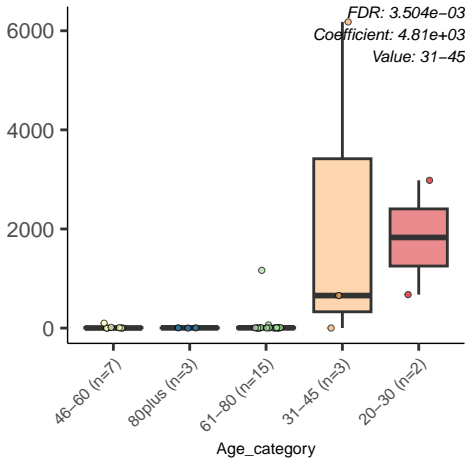



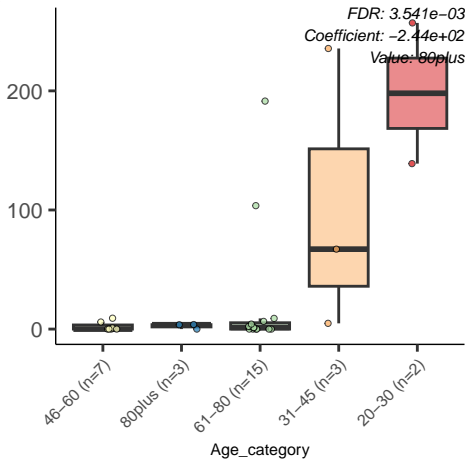

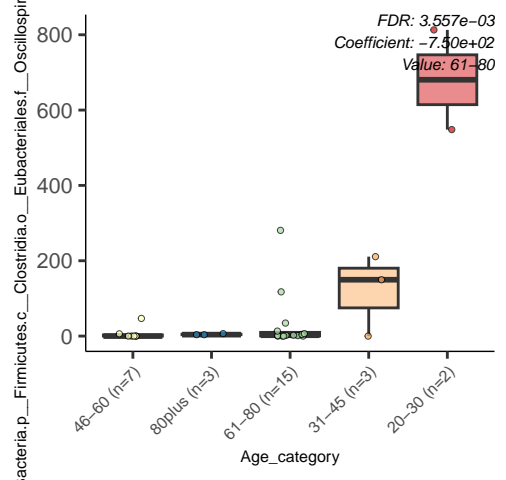

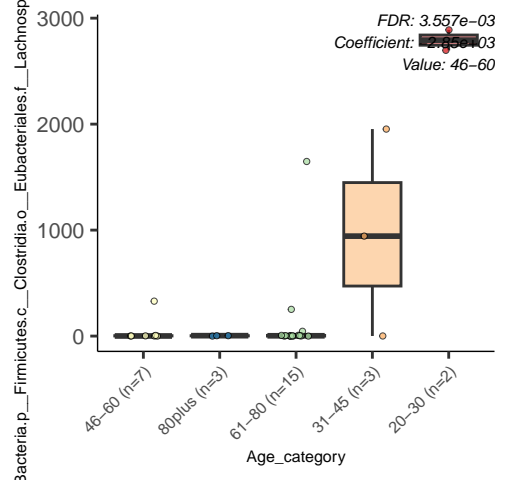

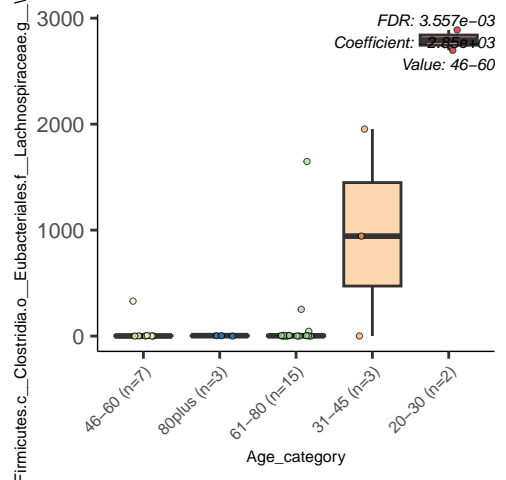

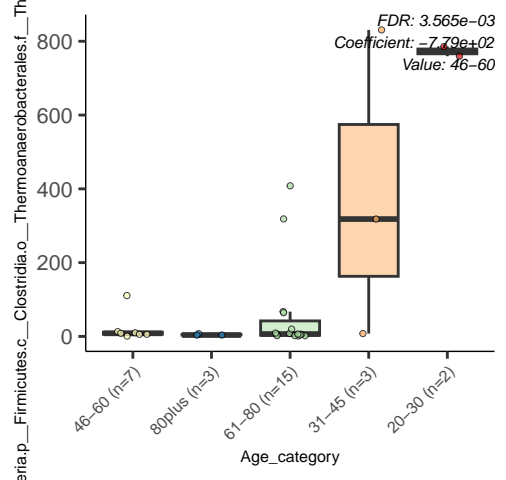

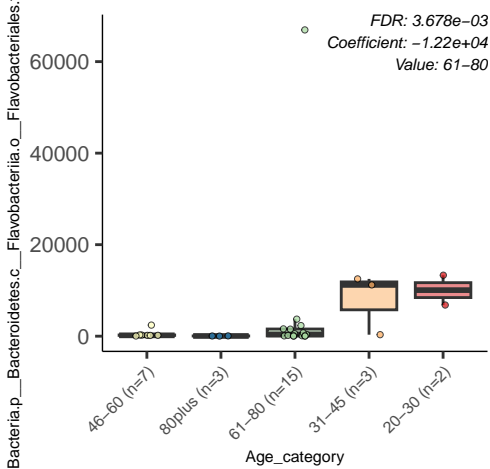

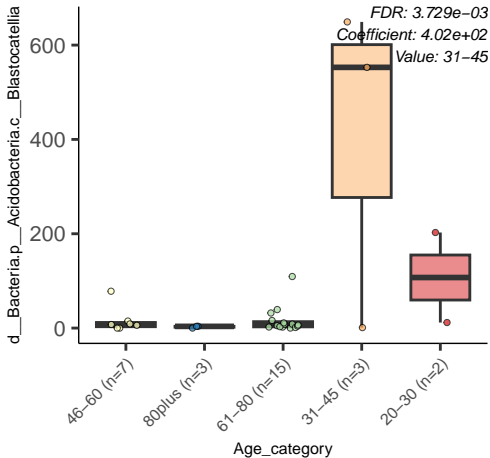

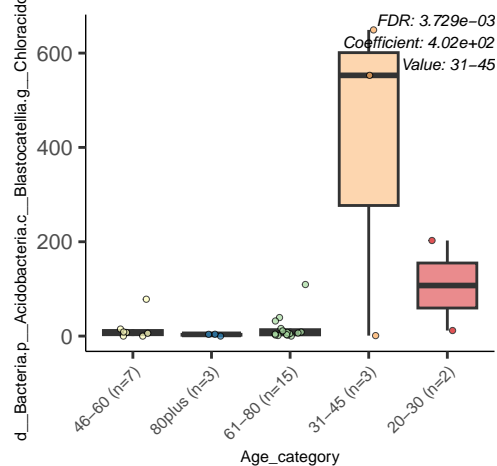



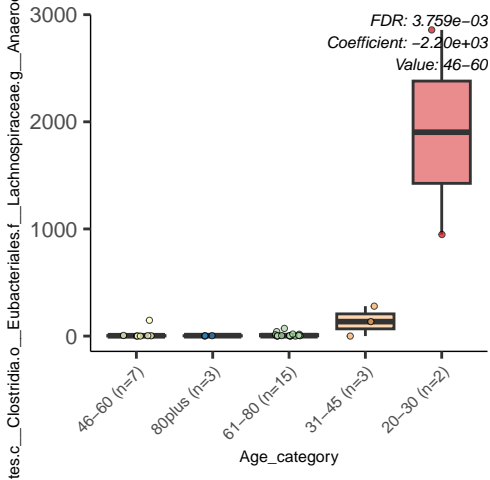

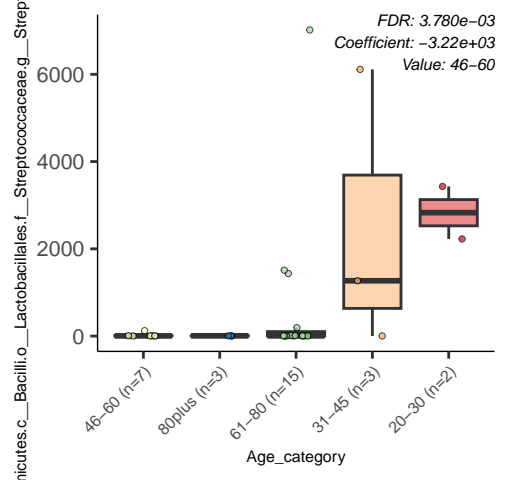

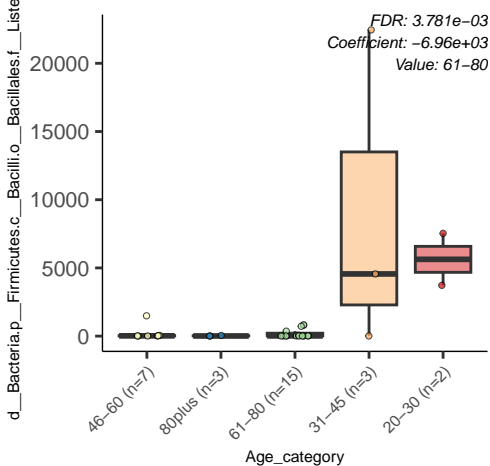

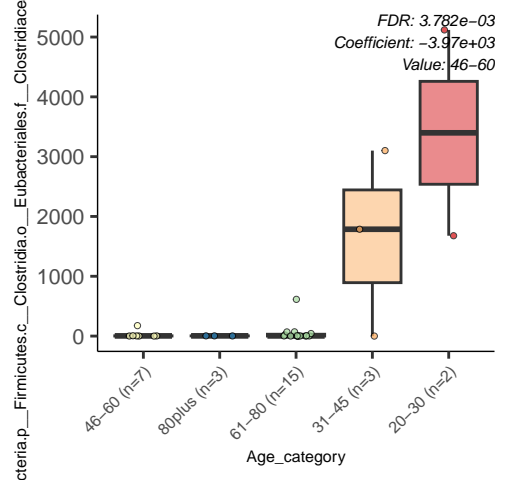

roidetes.c\_\_Bacteroidia.o\_\_Bacteroidales.f\_\_Bacteroidaceae.g\_\_Ph

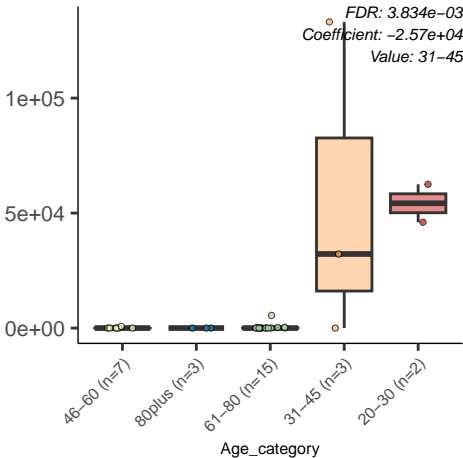

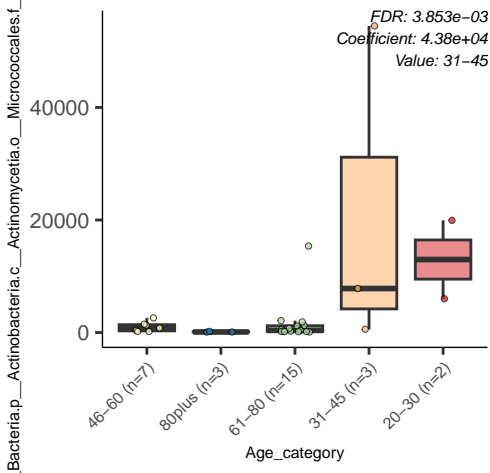

cteria.p\_\_Bacteroidetes.c\_\_Cytophagia.o\_\_Cytophagales.f\_\_Spiros

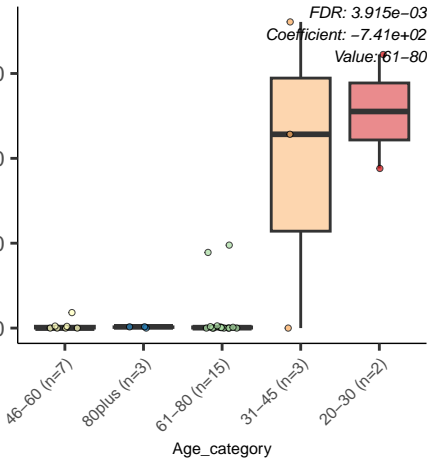

cteroidetes.c\_\_Cytophagia.o\_\_Cytophagales.f\_\_Spirosomaceae.g

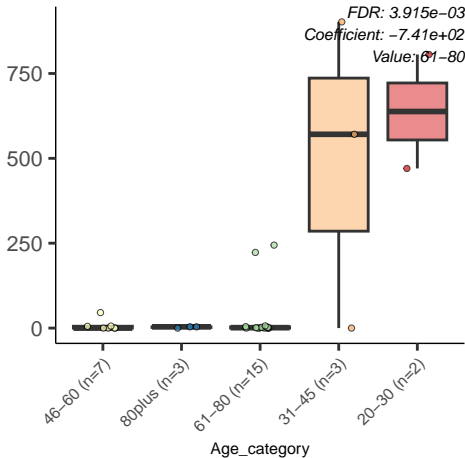



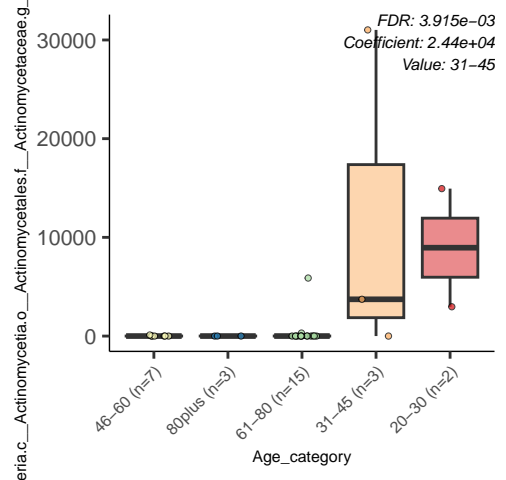

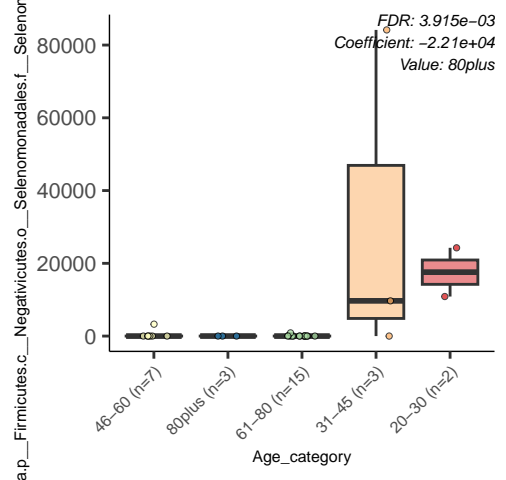

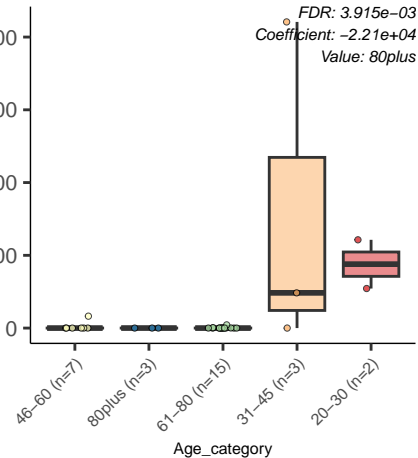

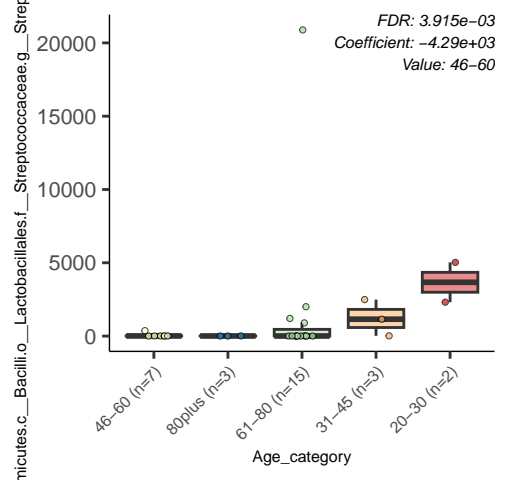

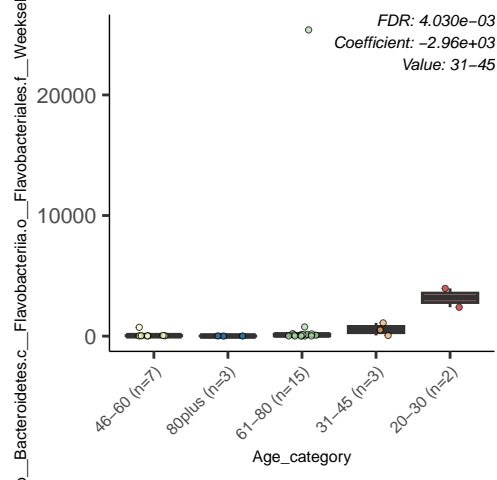

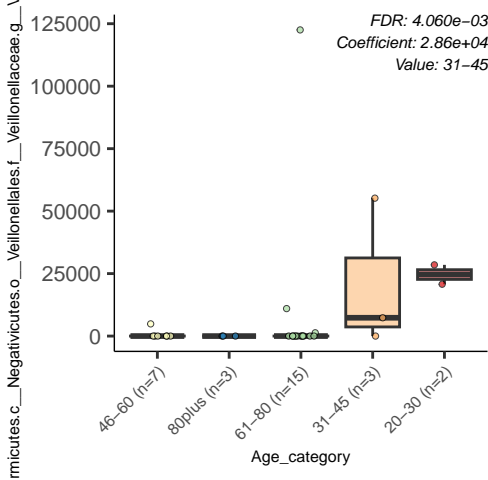

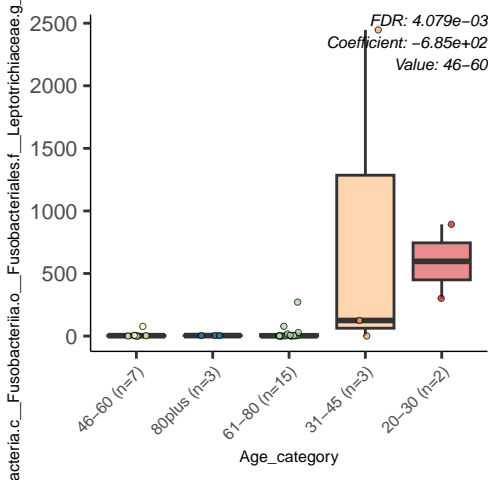

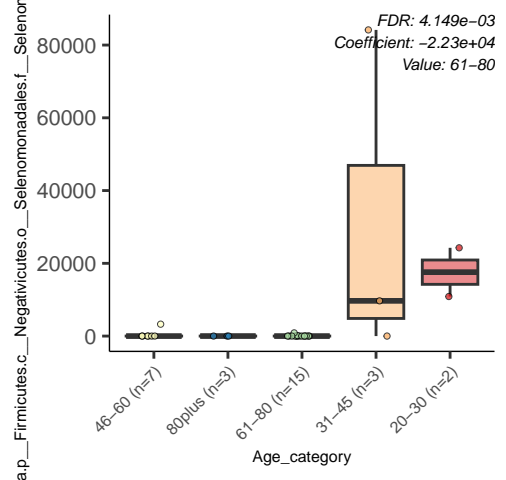



tes.c\_\_Negativicutes.o\_\_Selenomonadales.f\_\_Selenomonadaceae.g\_\_

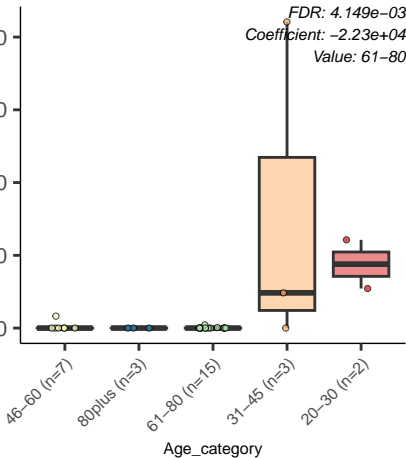

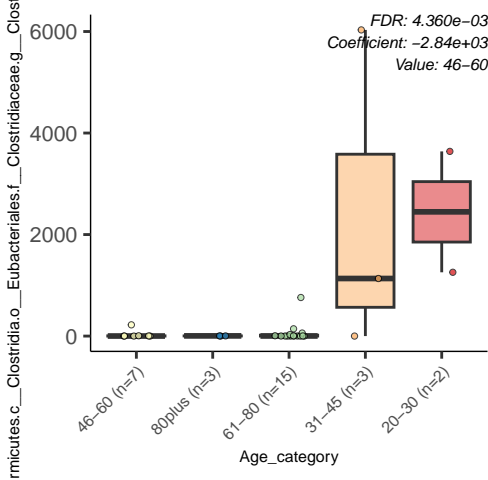

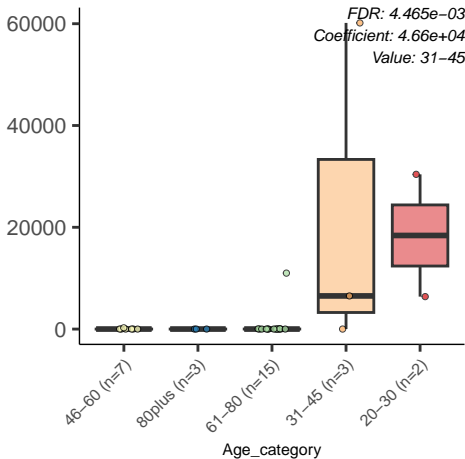

Firmicutes.c\_\_Negativicutes.o\_\_Acidaminococcales.f\_\_Acidaminococcus

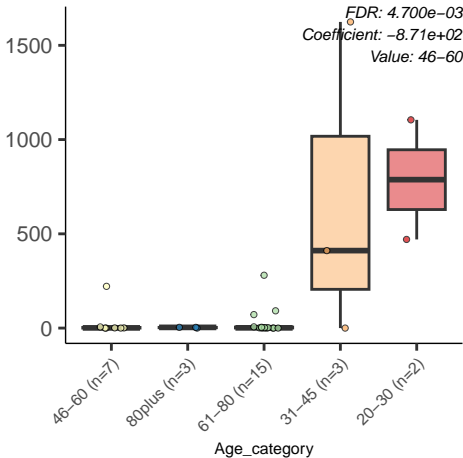

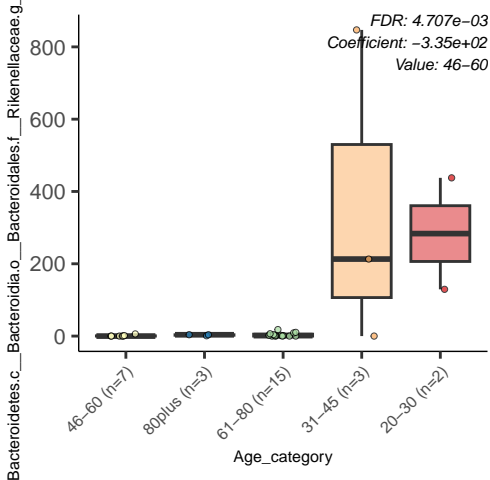



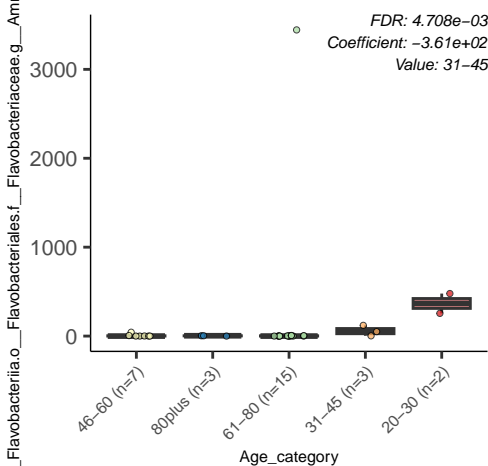

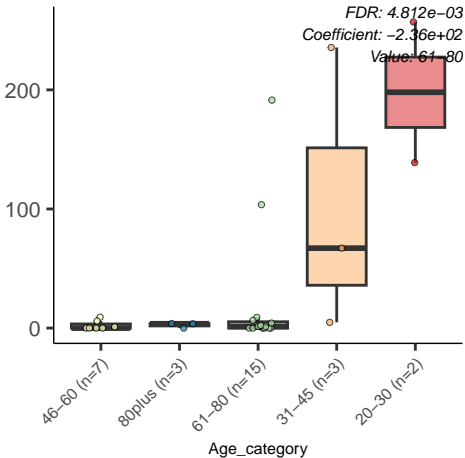



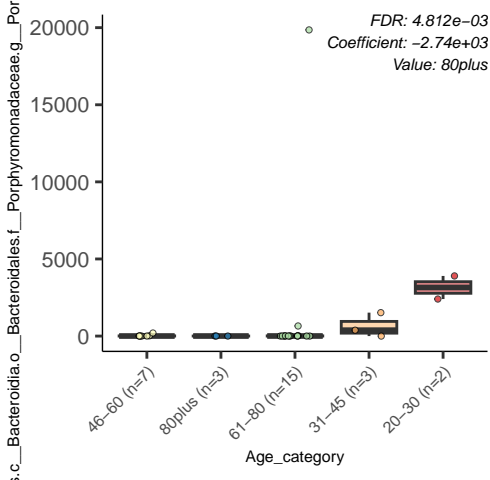

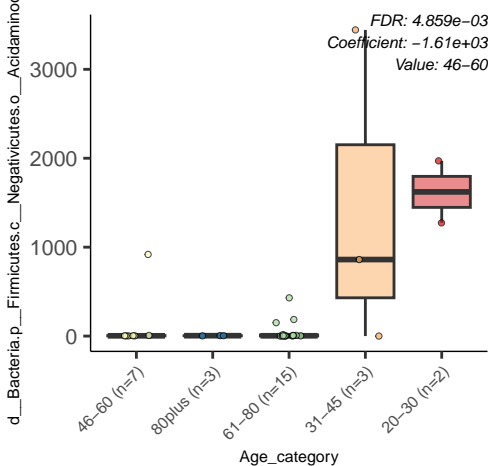

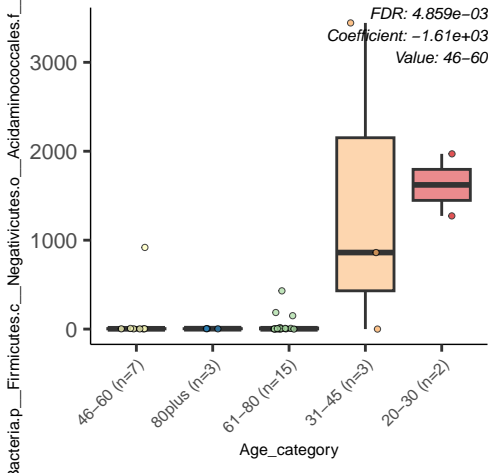

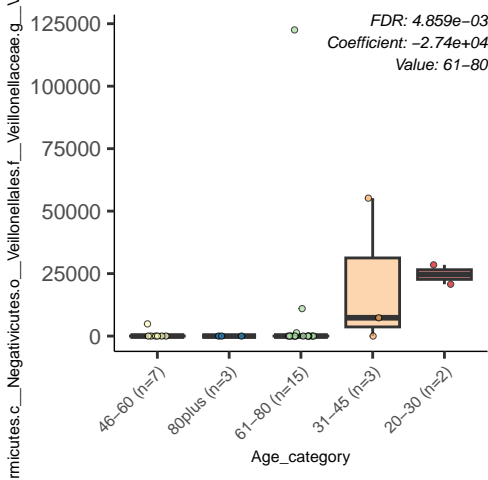

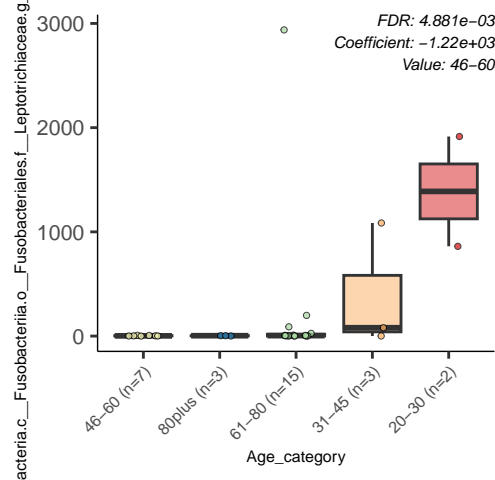

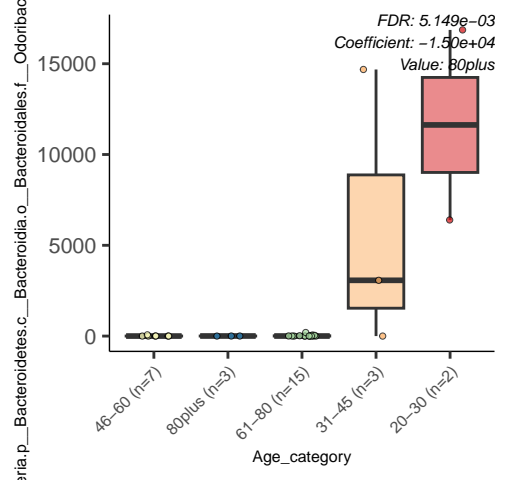

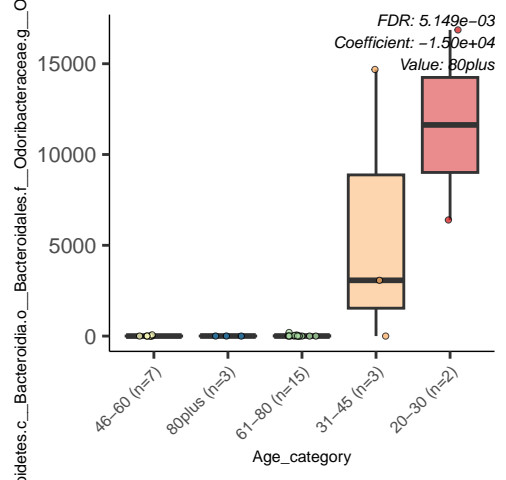

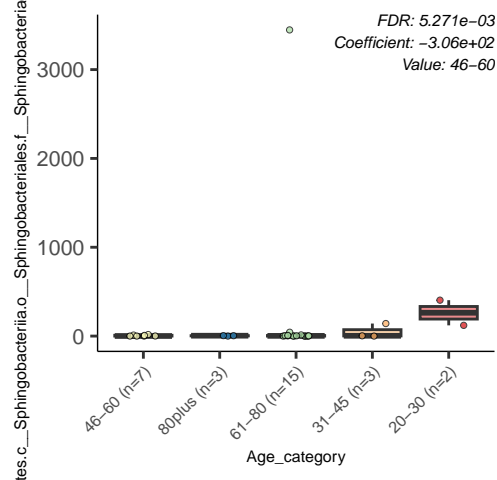



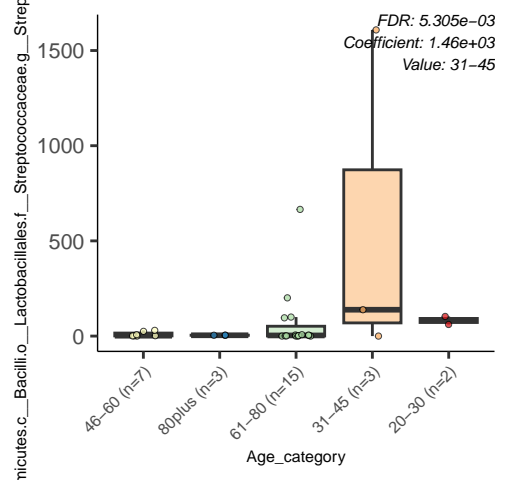

acteria.p\_\_Firmicutes.c\_\_Clostridia.o\_\_Eubacteriales.f\_\_Oscillospiraceae

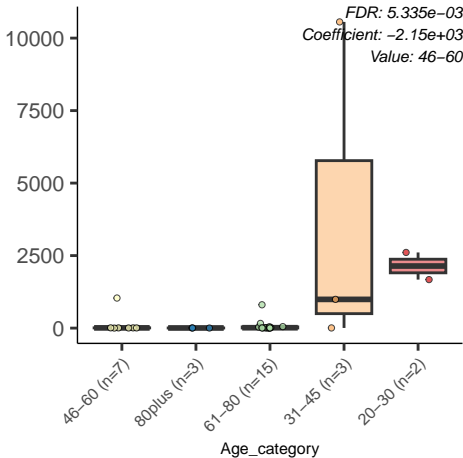

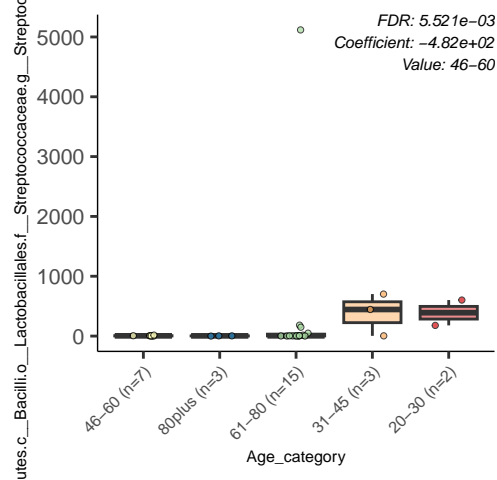

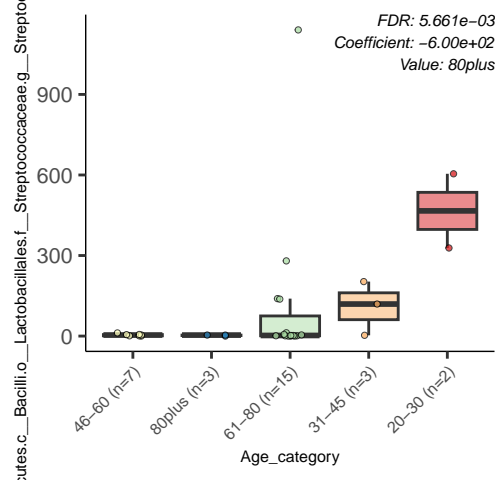

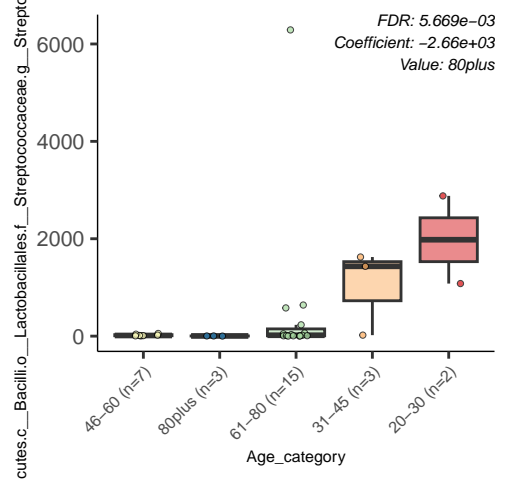

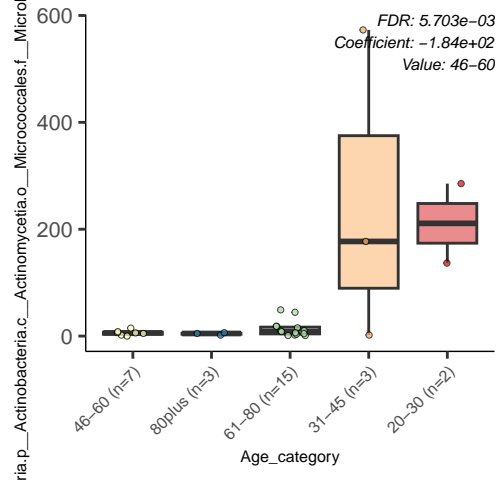

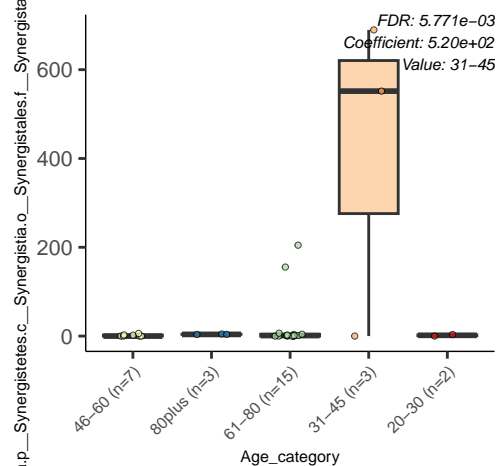

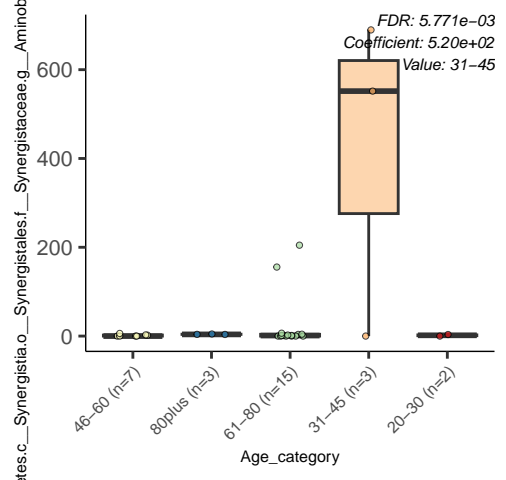



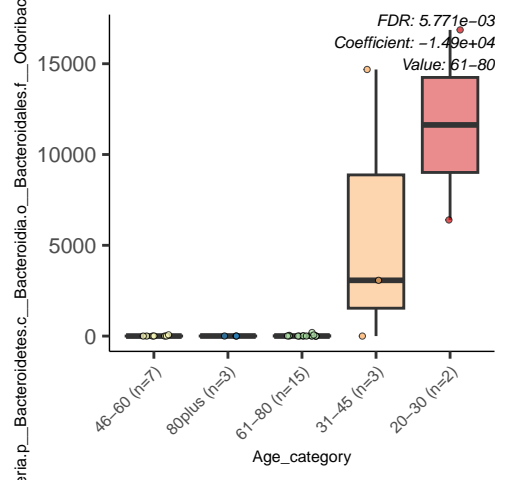

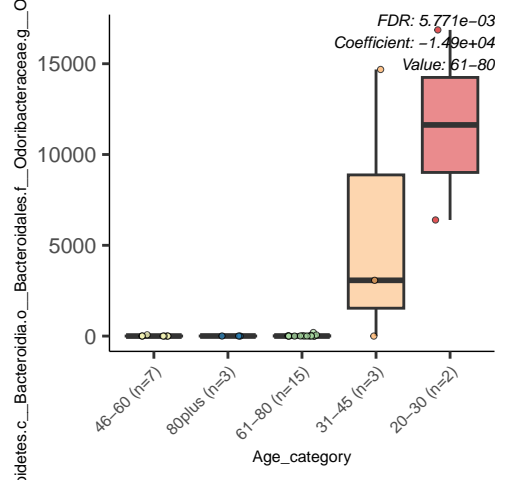

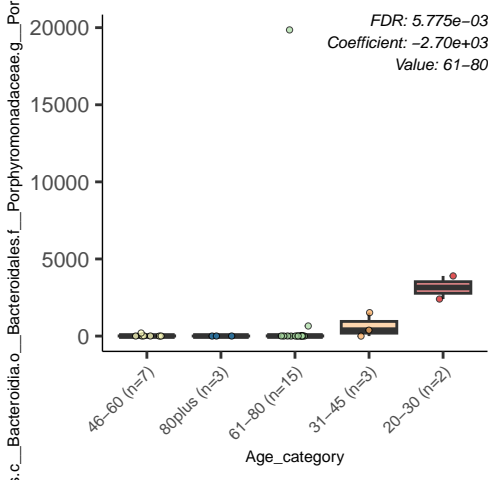

d\_\_Bacteria.p\_\_Chlorobi

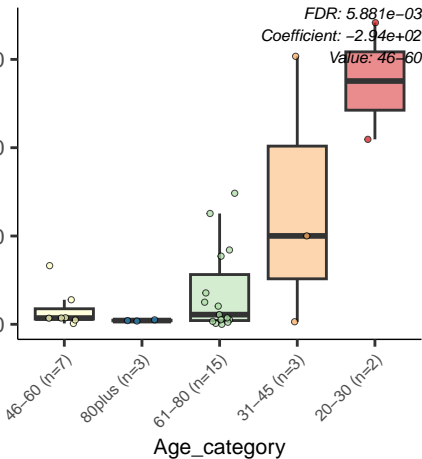

d\_\_Bacteria.p\_\_Chlorobi.c\_\_Chlorobia

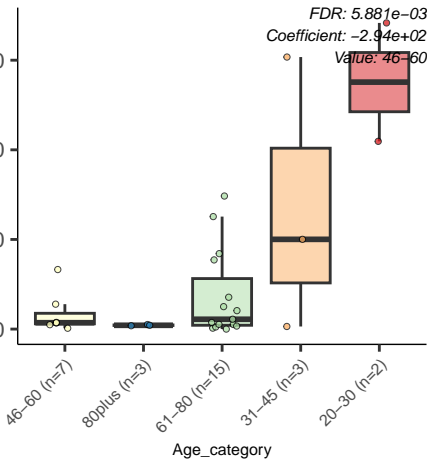

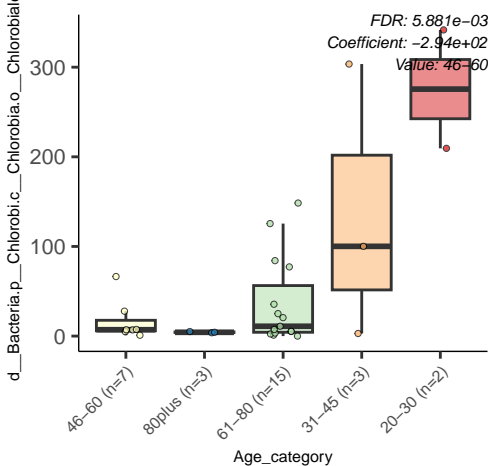

d\_\_Bacteria.p\_\_Chlorobi.c\_\_Chlorobia.o\_\_Chlorobiales.f\_\_Ch

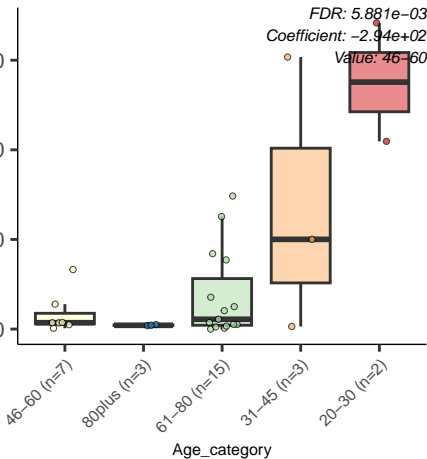

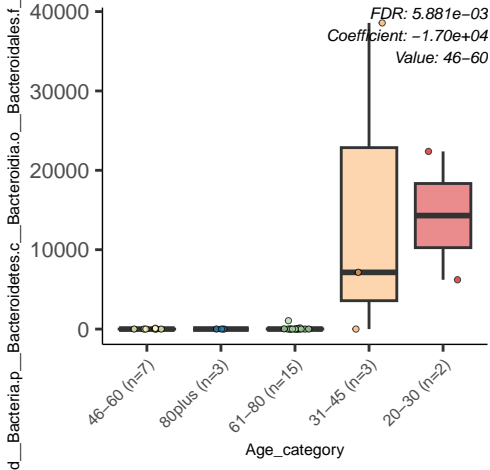



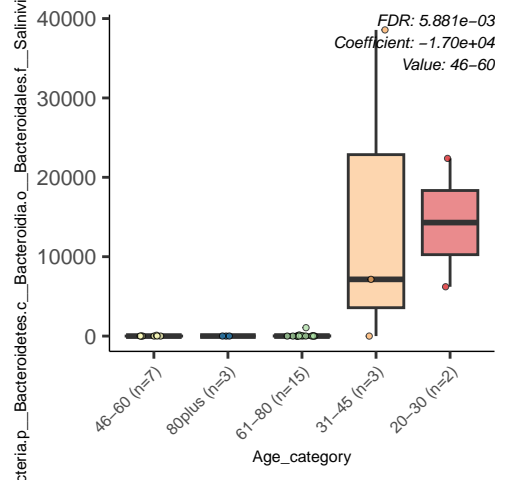

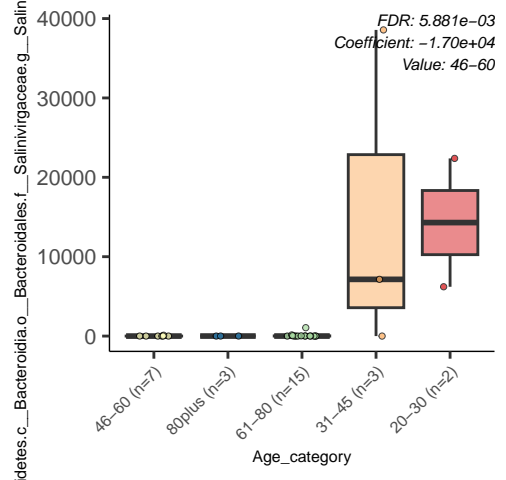

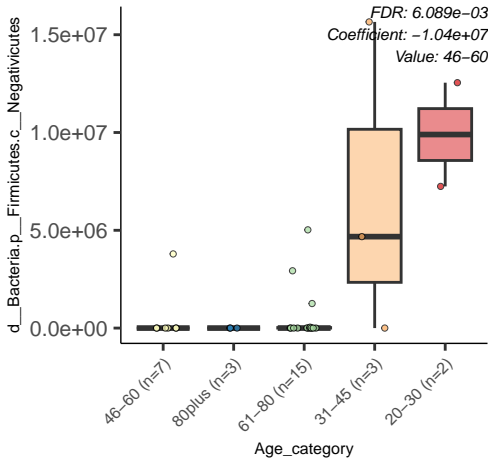

a.p\_Actinobacteria.c\_Coriobacteriia.o\_Eggerthellales.f\_Eggerth

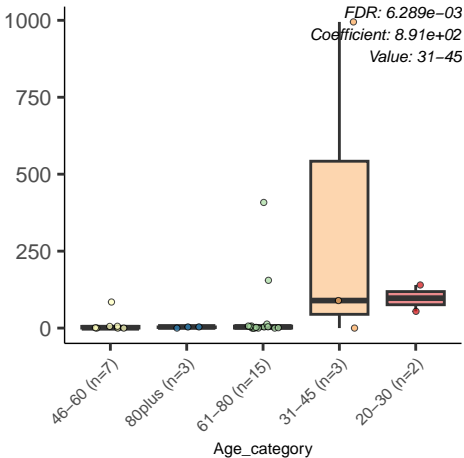

cteria.c\_\_Coriobacteriia.o\_\_Eggerthellales.f\_\_Eggerthellaceae.g\_\_F

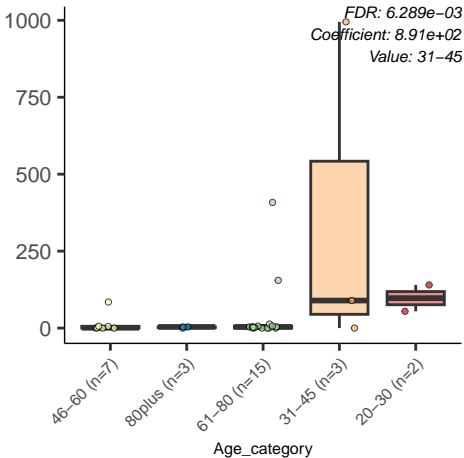

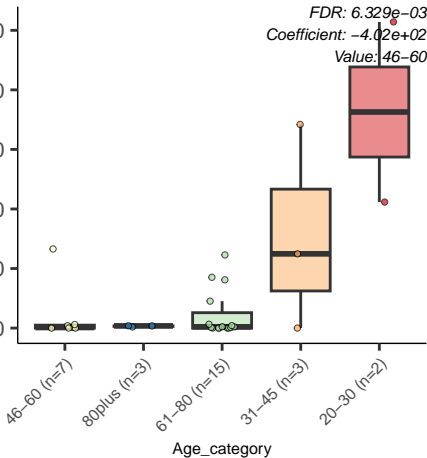

irmicutes.c\_\_Clostridia.o\_\_Eubacteriales.f\_\_Lachnospiraceae.g\_\_B

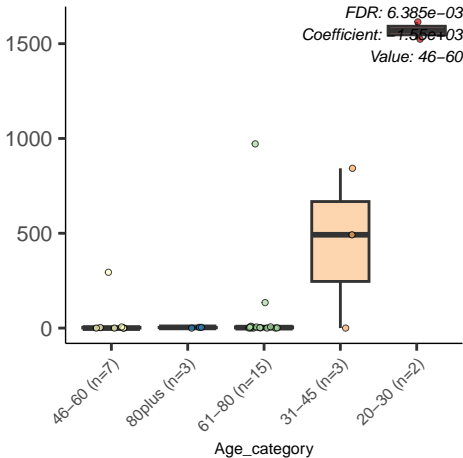

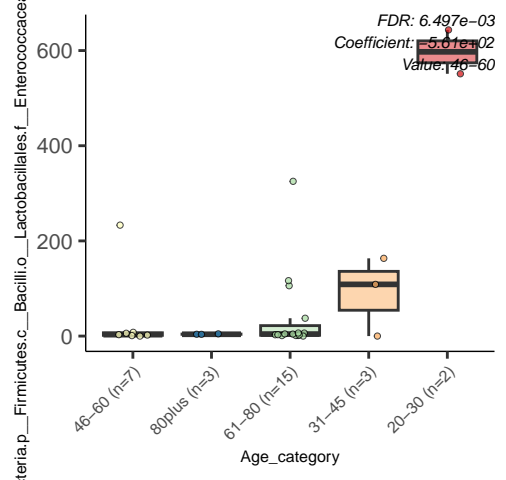



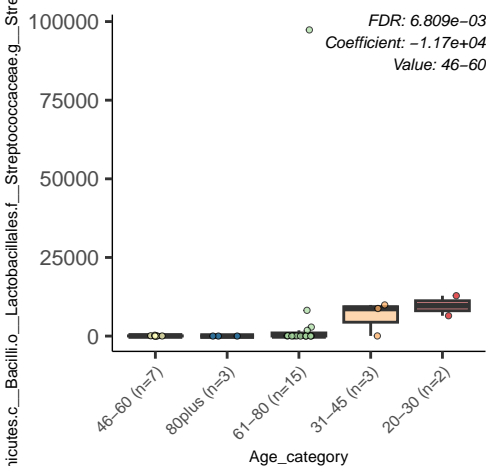

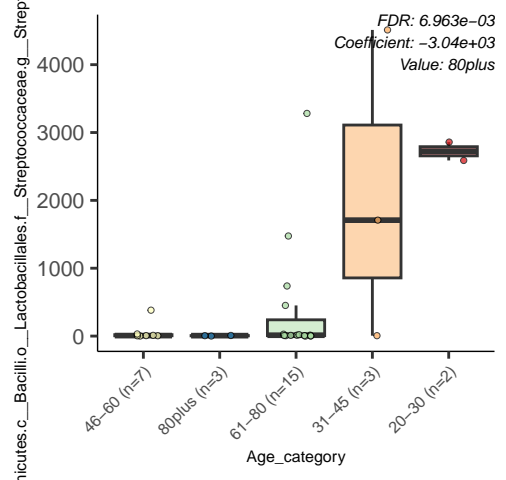

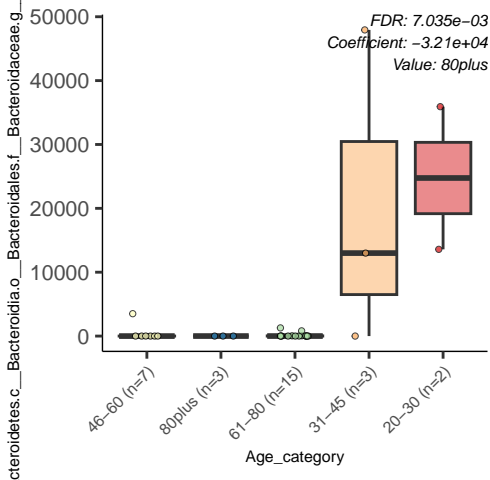

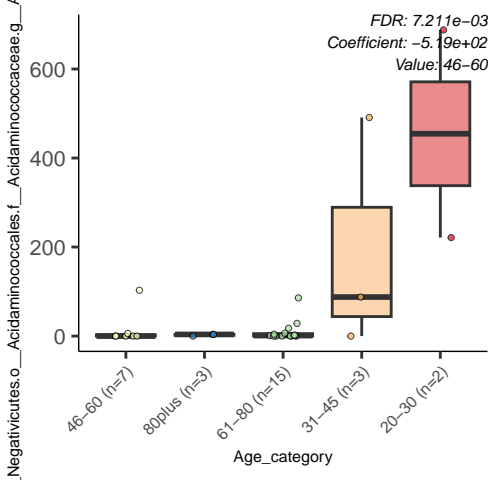

d\_\_Bacteria.p\_\_Tenericutes.c\_\_Mollicutes.o\_\_Entomoplas

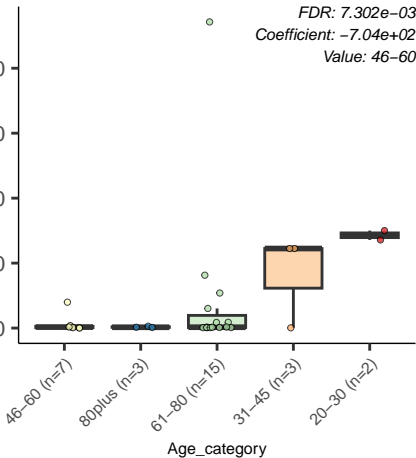

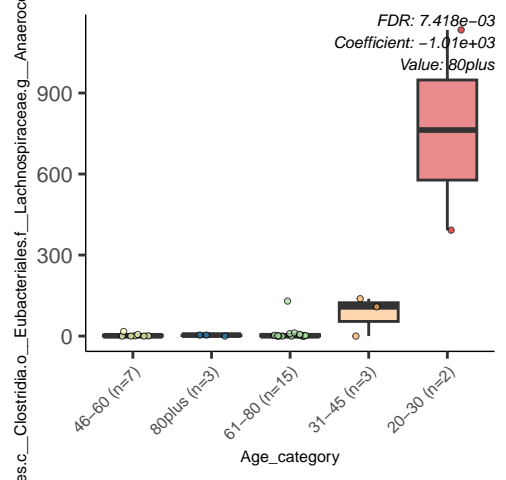

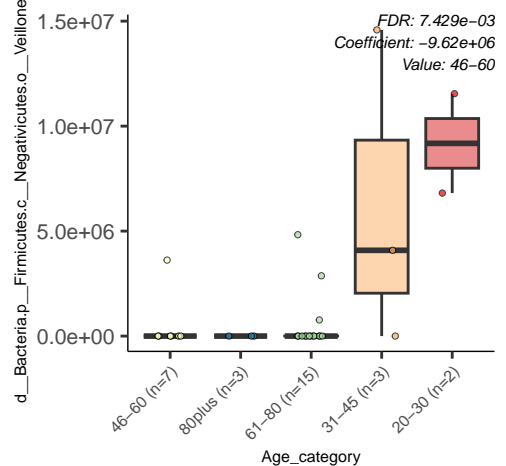

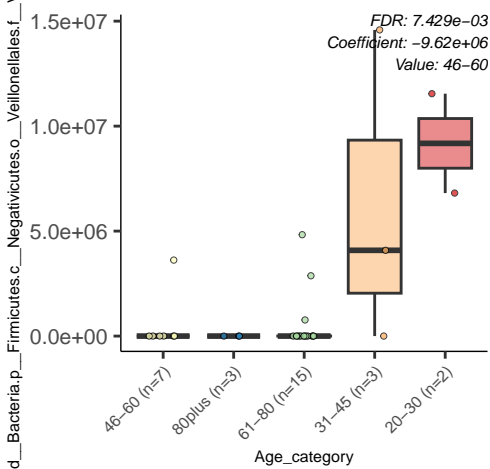



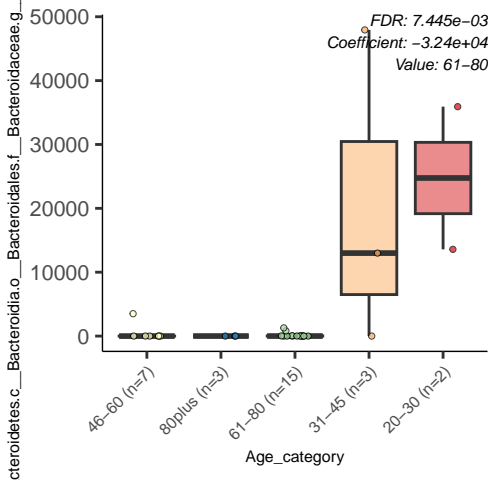

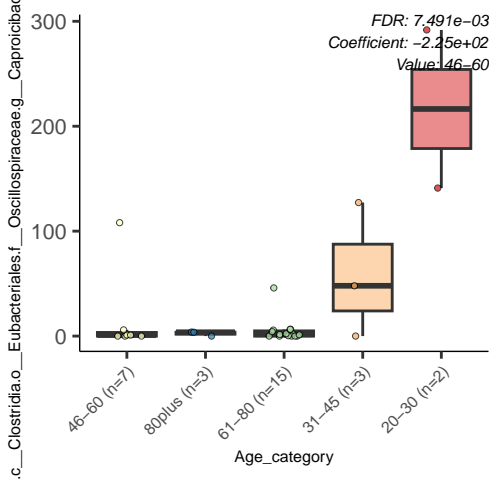

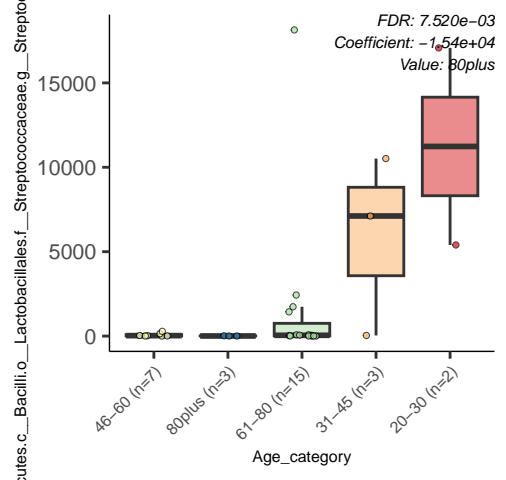

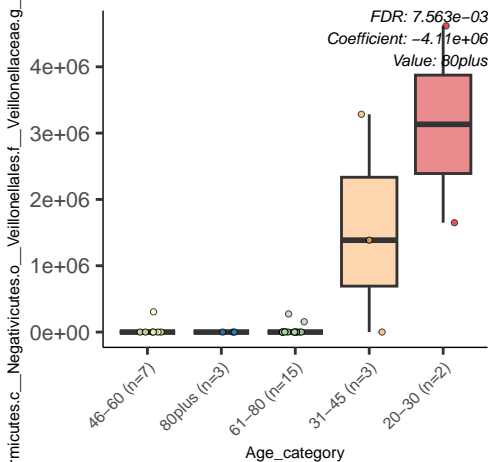

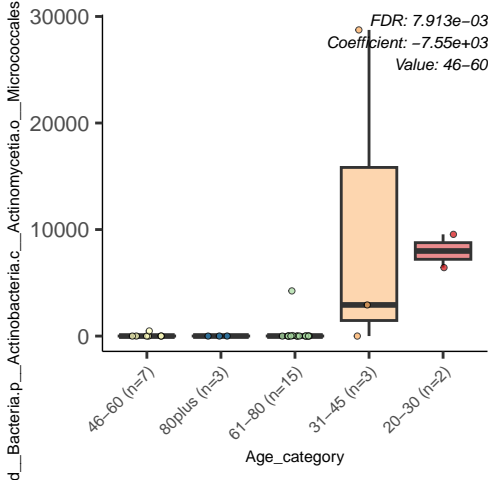

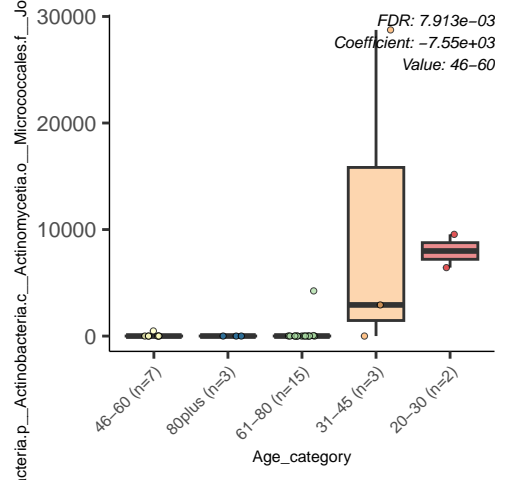

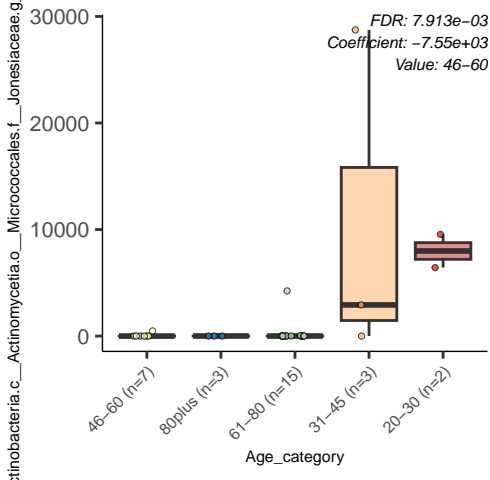

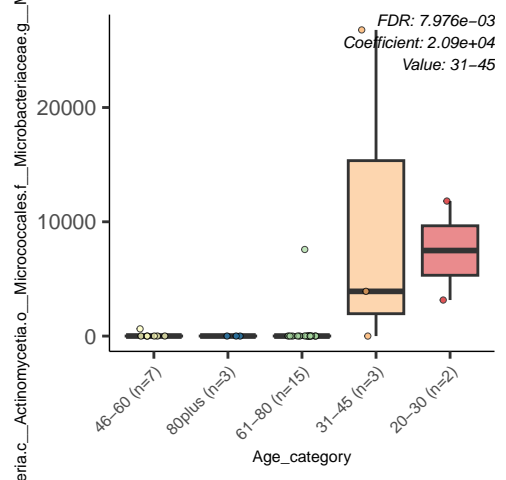



Bacteria.p\_Firmicutes.c\_Clostridia.o\_Eubacteriales.f\_Lachnosp

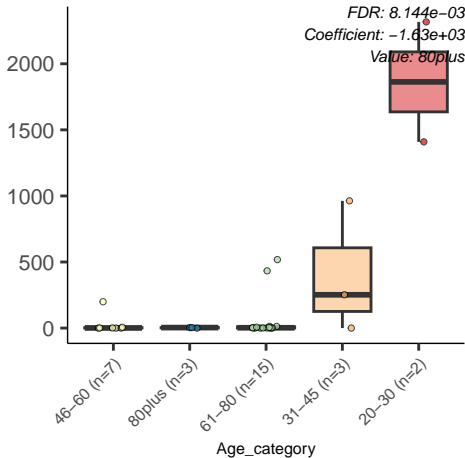

p\_\_Firmicutes.c\_\_Clostridia.o\_\_Eubacteriales.f\_\_Lachnospiraceae.g\_\_

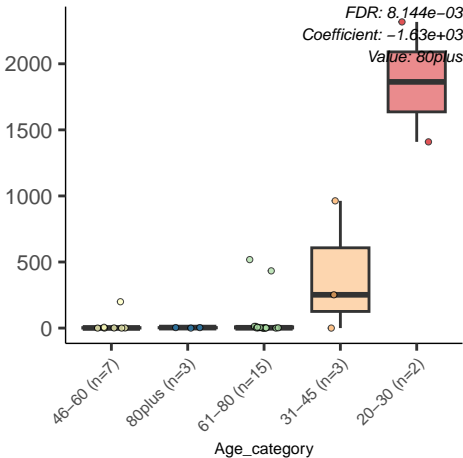

Actinomycetia.o\_\_Pseudonocardiales.f\_\_Pseudonocardaceae.g

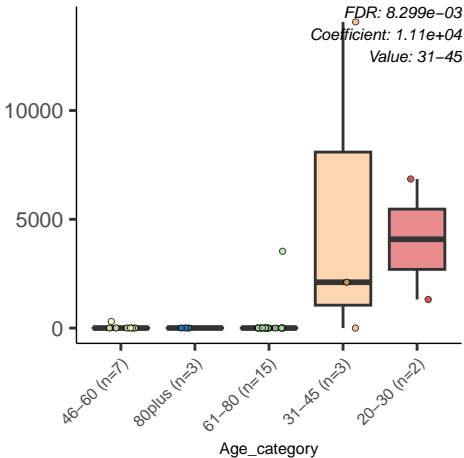

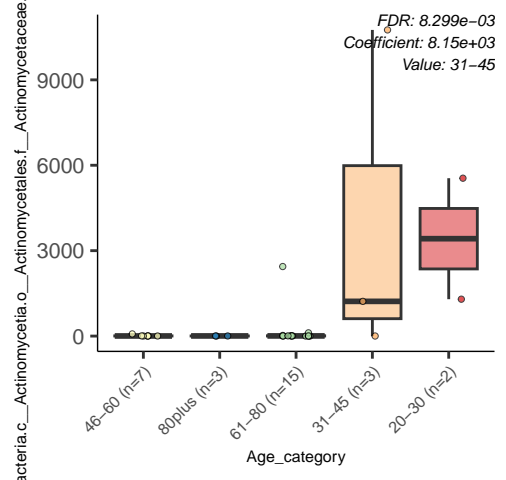

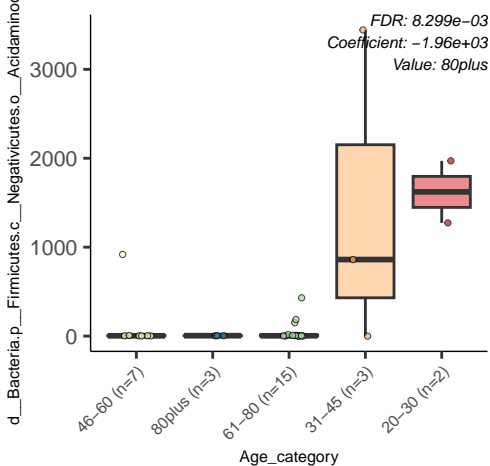

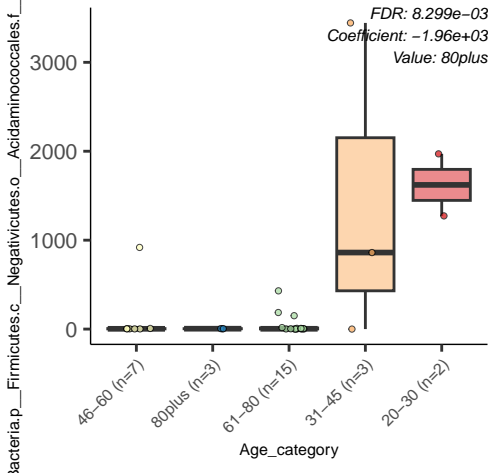

bacteria.p\_\_Proteobacteria.c\_\_Betaproteobacteria.o\_\_Neisseriales.f

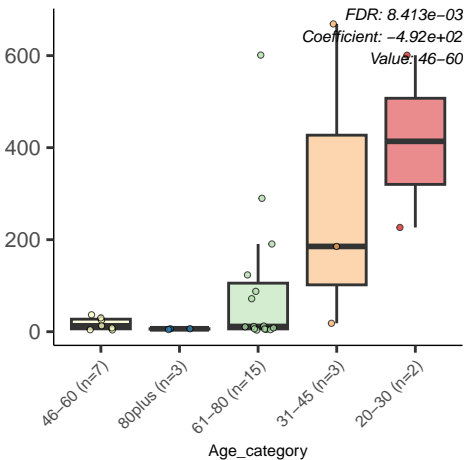

a.p\_\_Actinobacteria.c\_\_Actinomycetia.o\_\_Micrococcales.f\_\_Microc

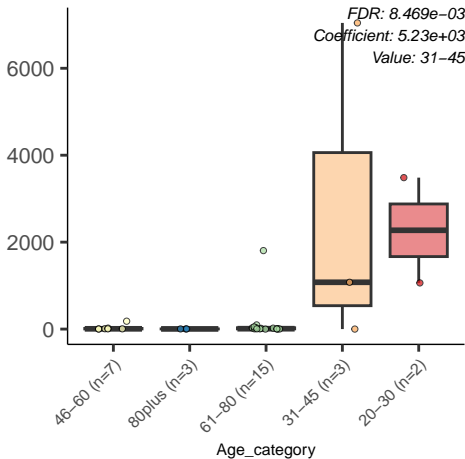



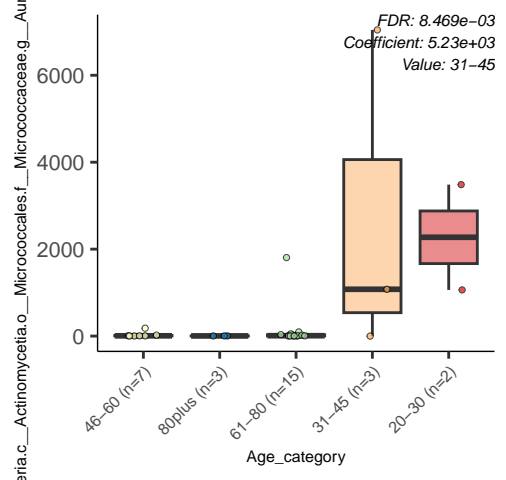

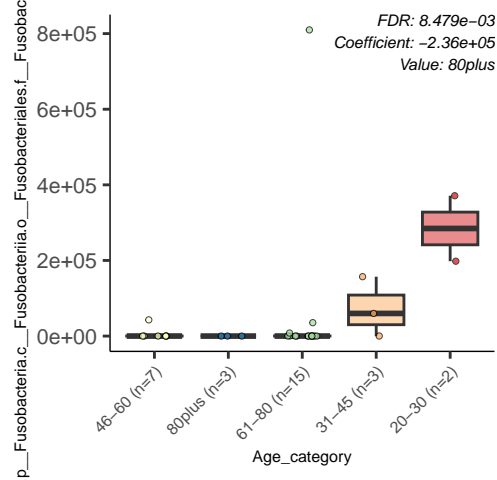

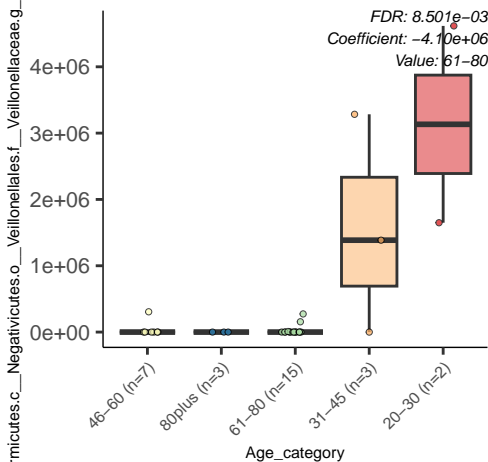

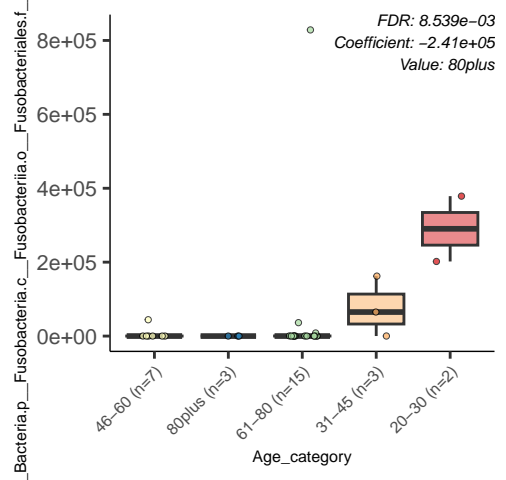

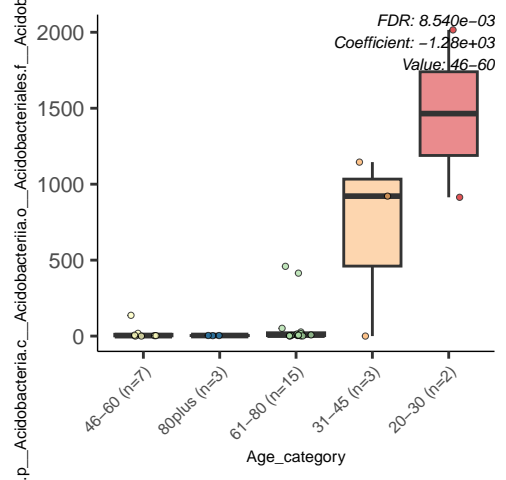

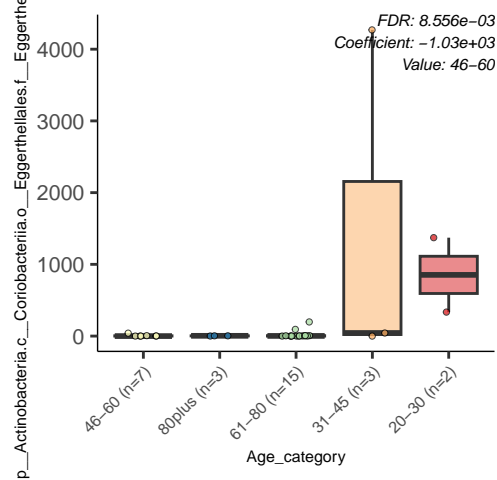

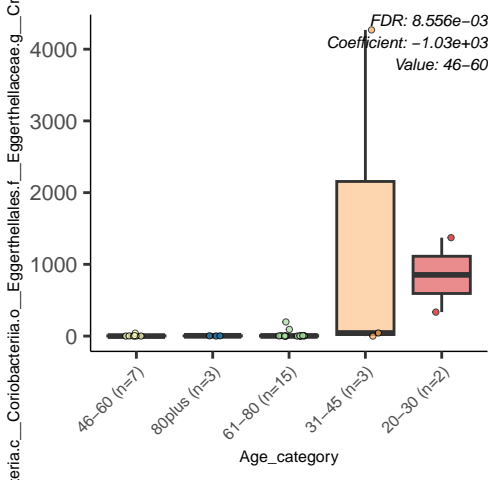

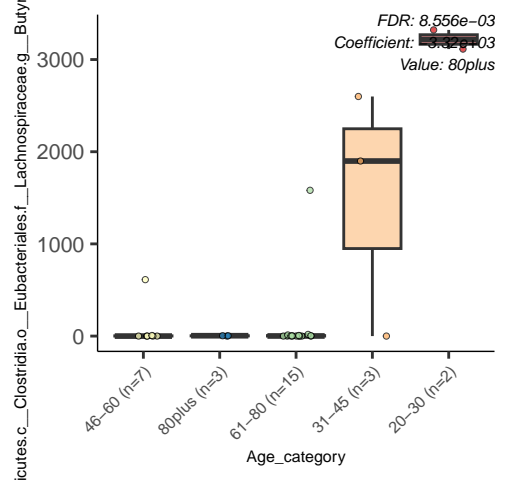



tertia.c\_\_Acidobacteriia.o\_\_Acidobacteriales.f\_\_Acidobacteriaceae.g

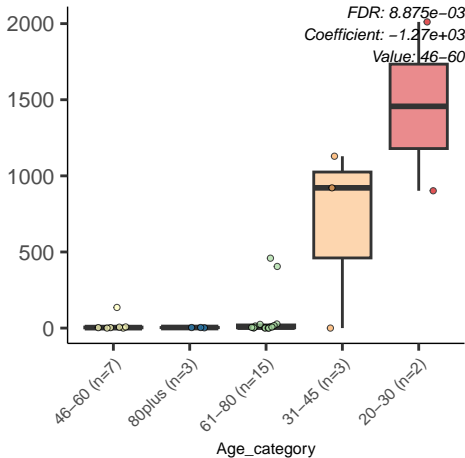

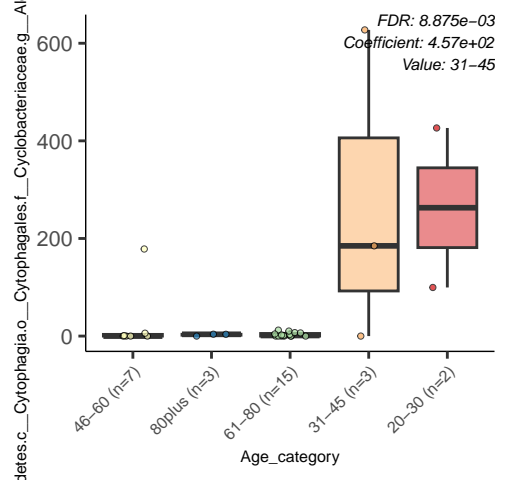

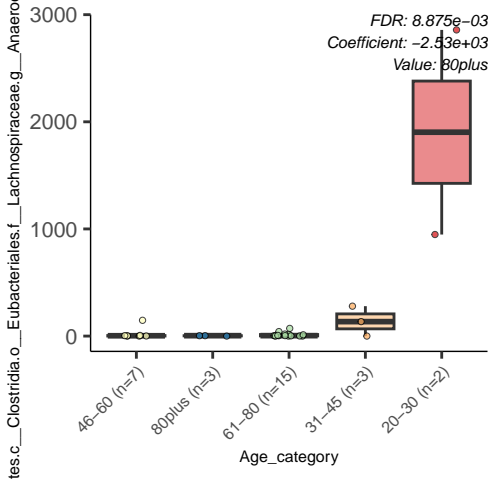

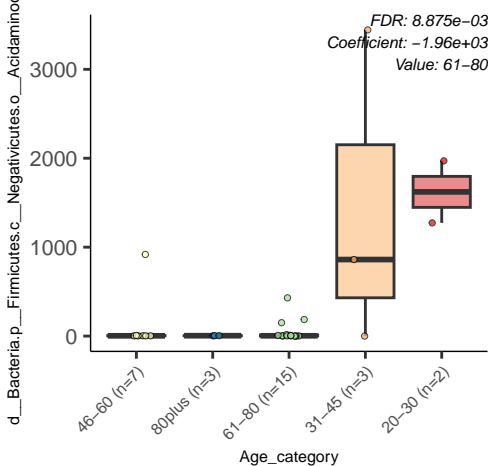

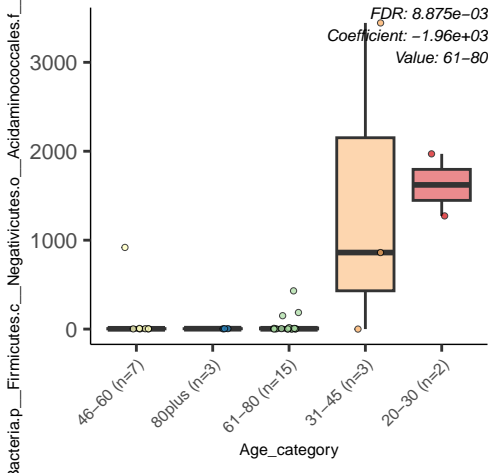

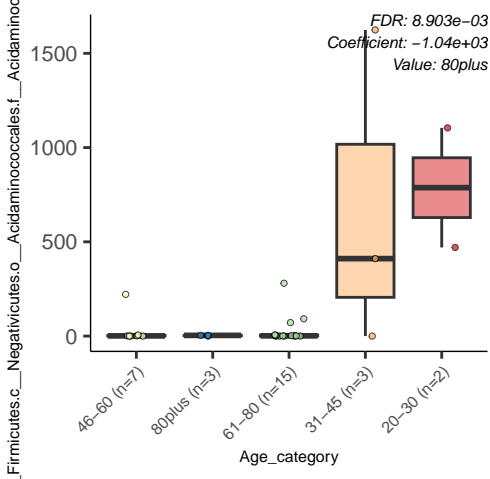

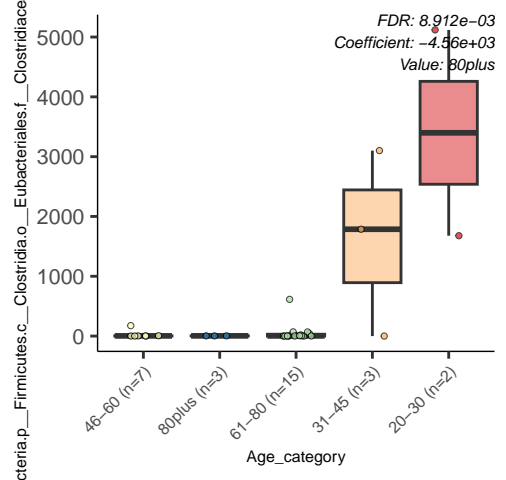

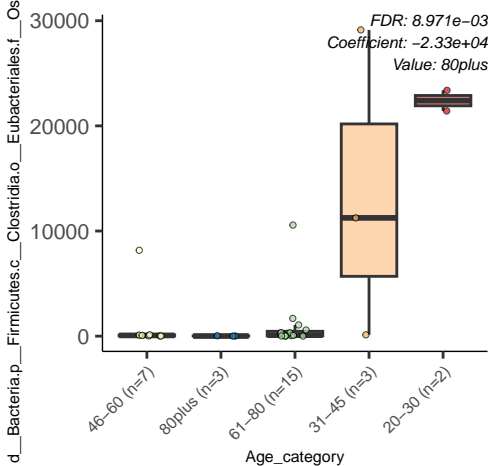



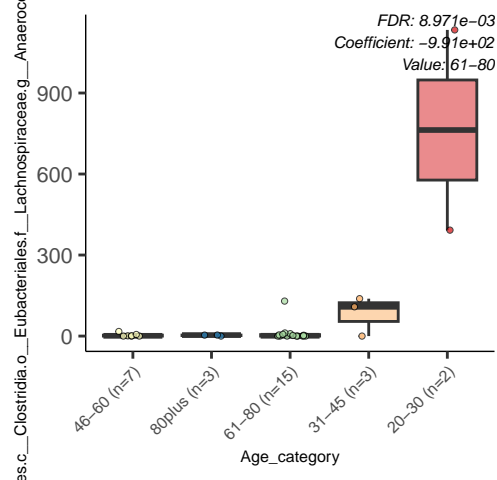

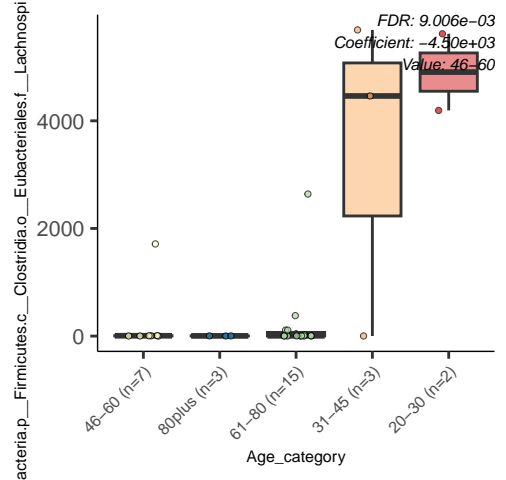

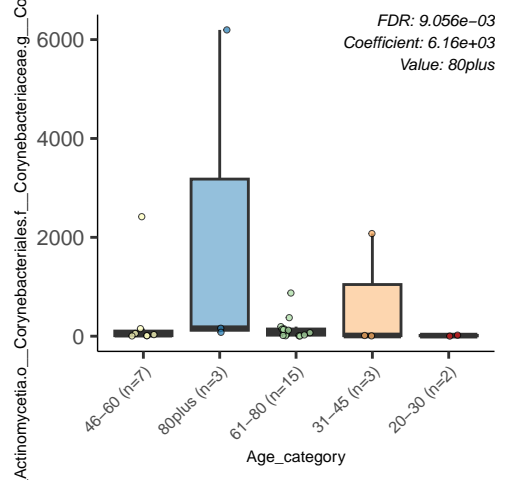

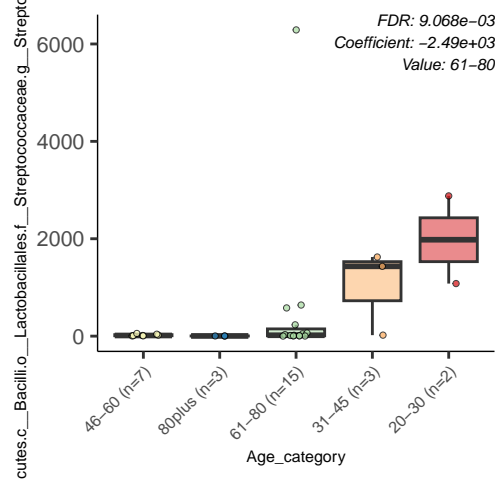

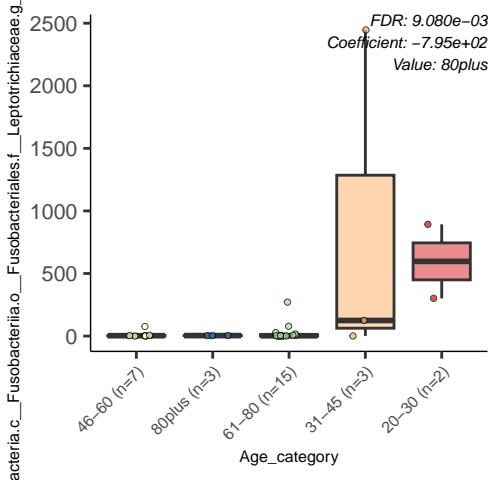

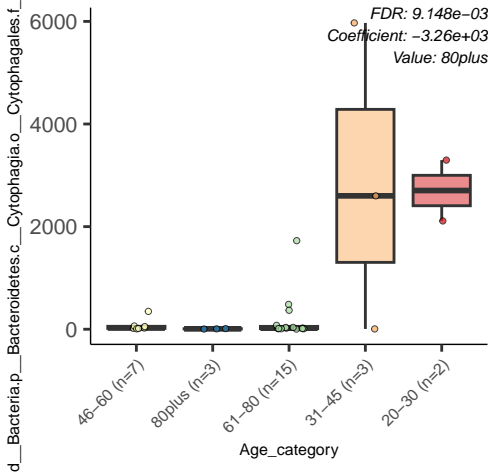

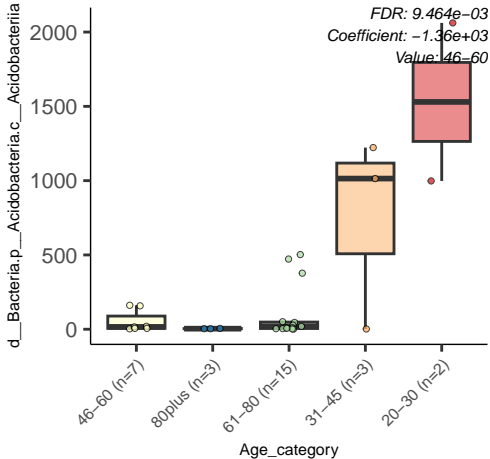

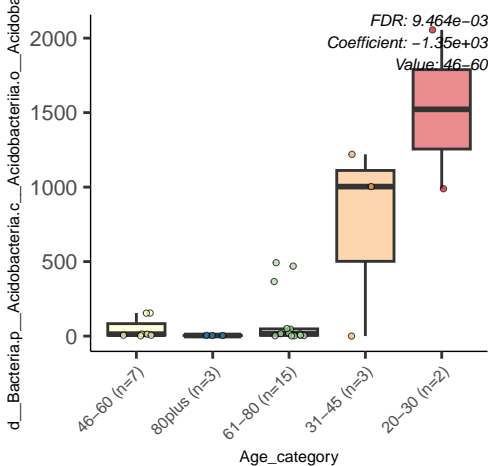



Bacteria.p\_\_Acidobacteria.c\_\_Acidobacteriia.o\_\_Acidobacteriales.f\_\_

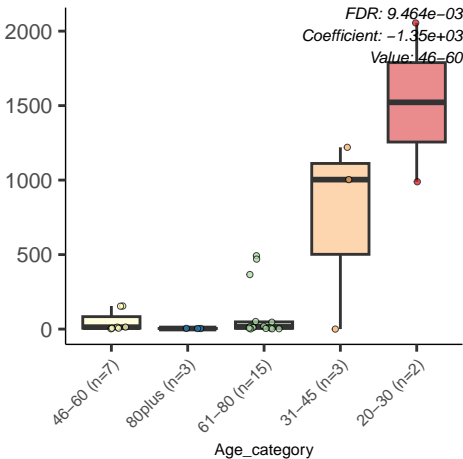

bacteria.c\_\_Fusobacteriia.o\_\_Fusobacteriales.f\_\_Leptotrichiaceae.g

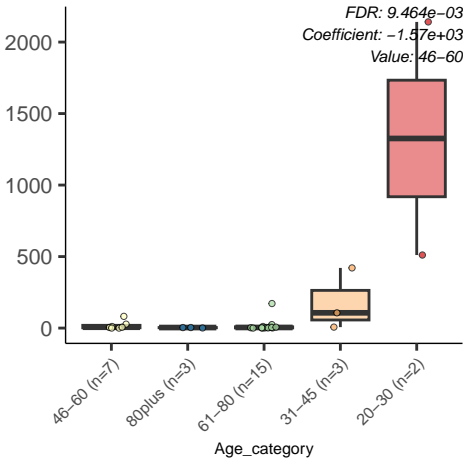

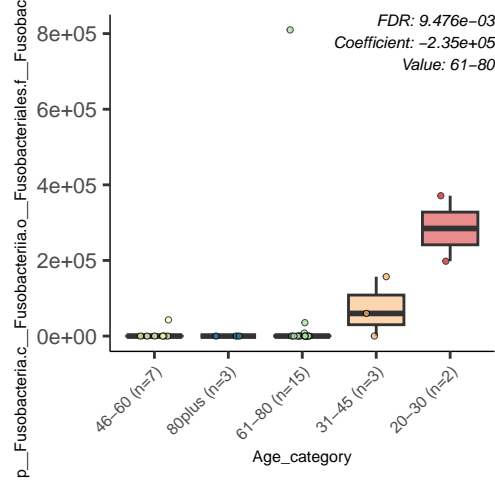

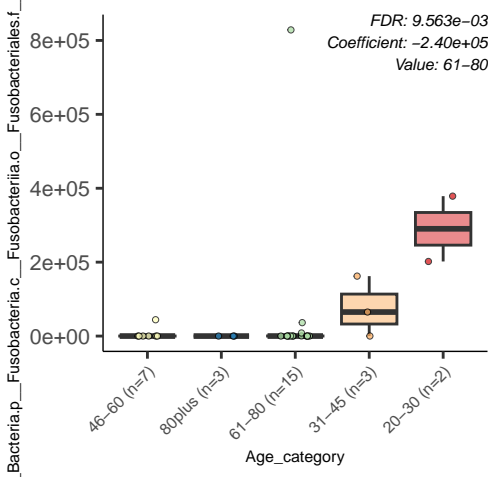

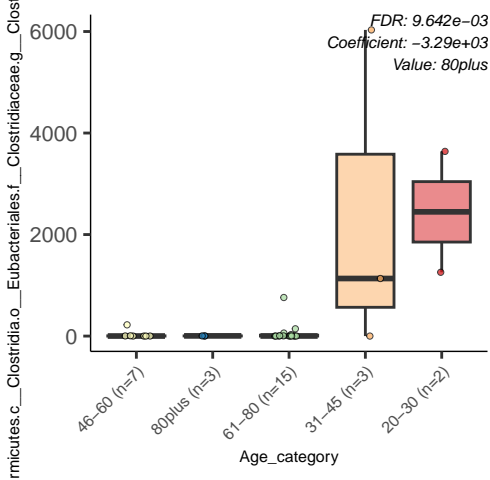

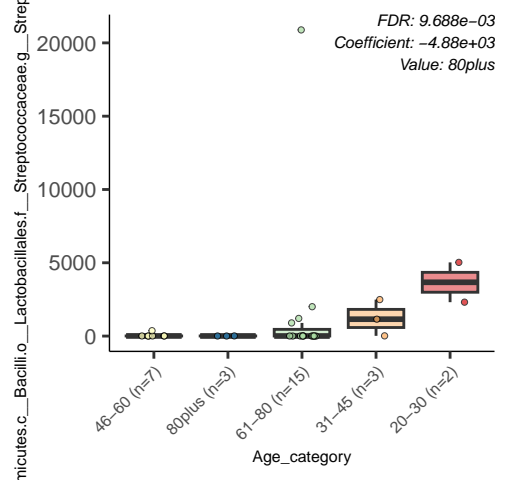

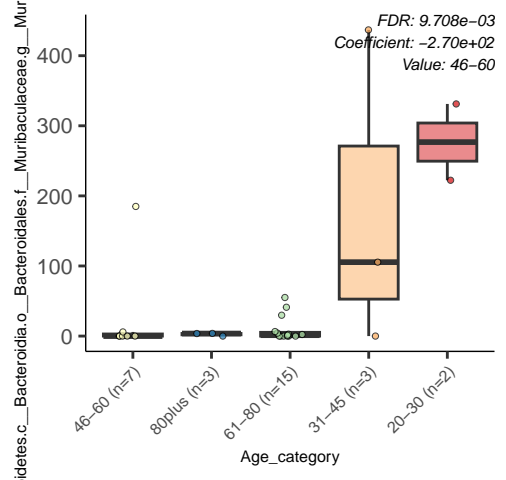

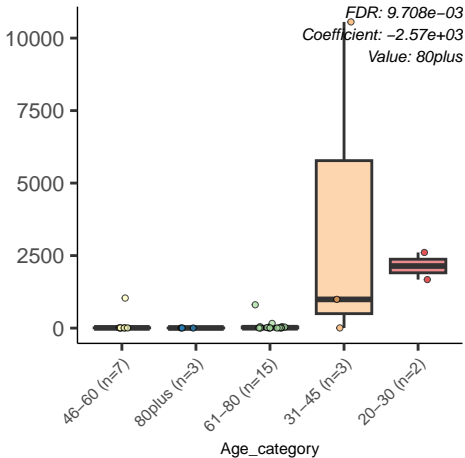



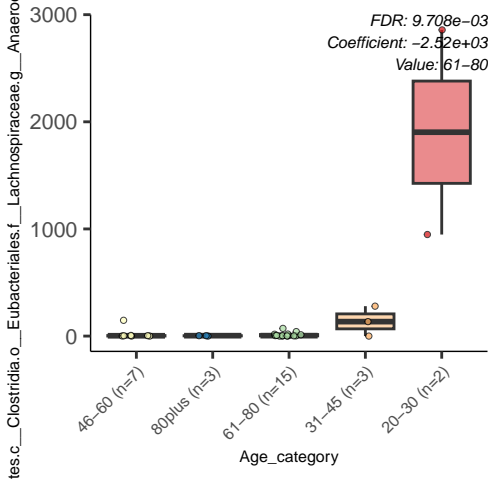

p\_Actinobacteria.c\_Actinomycetia.o\_Micrococcales.f\_Microb

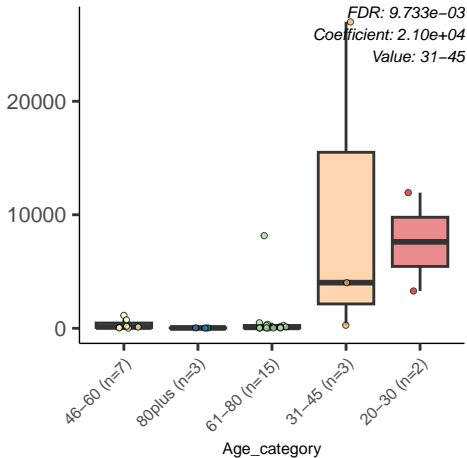

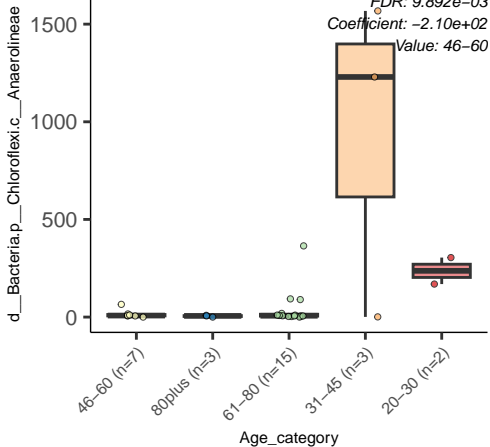

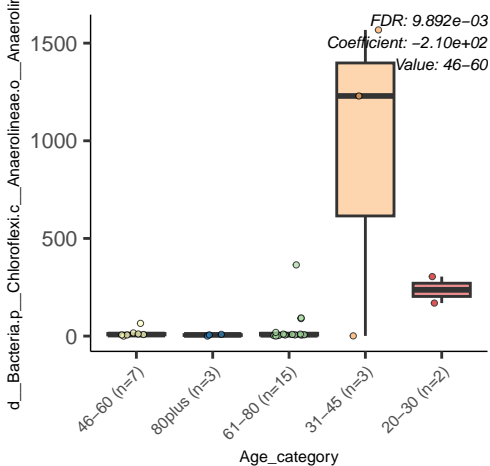

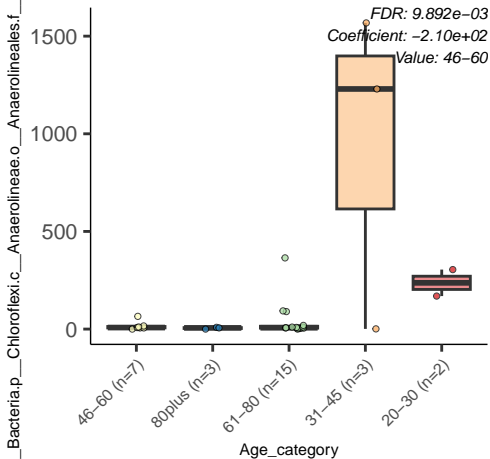

bacteria.p\_\_Firmicutes.c\_\_Clostridia.o\_\_Eubacteriales.f\_\_Oscillospira

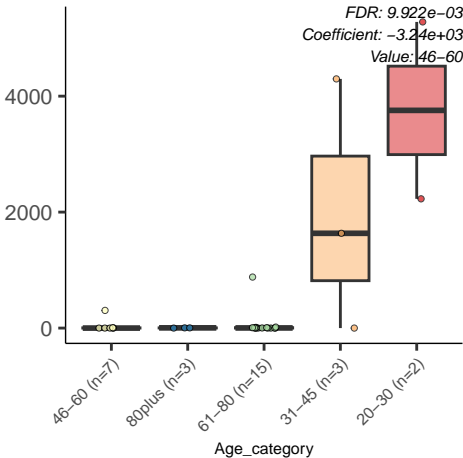

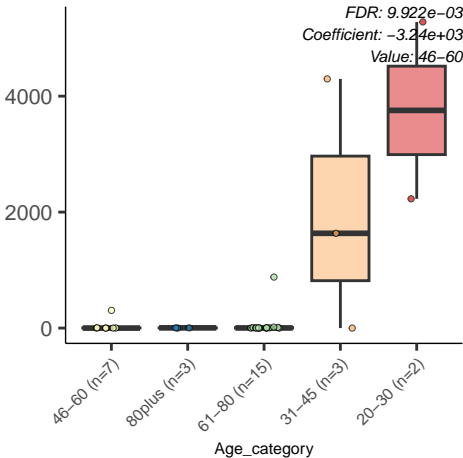

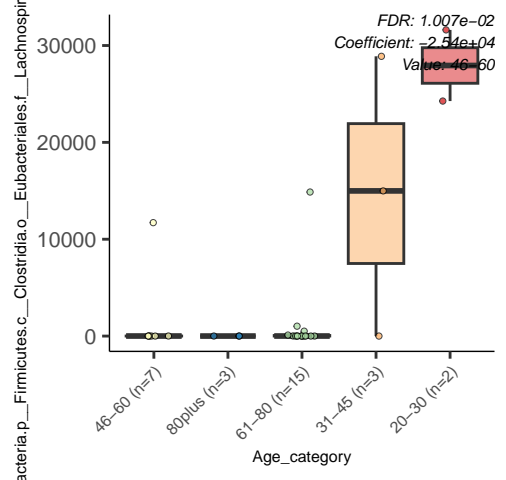



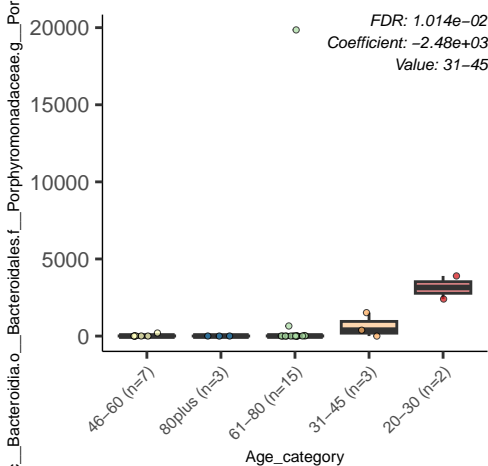

Bacteria.p\_Firmicutes.c\_Clostridia.o\_Eubacteriales.f\_Lachnosp

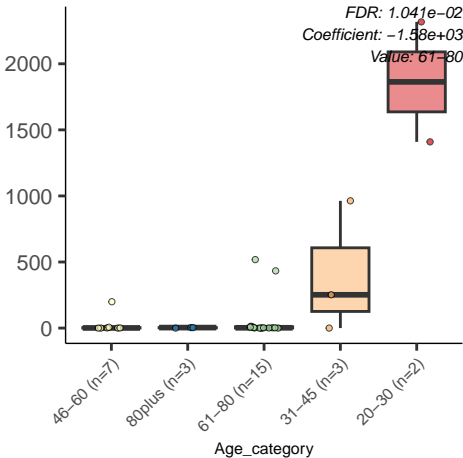

p\_Firmicutes.c\_Clostridia.o\_Eubacteriales.f\_Lachnospiraceae

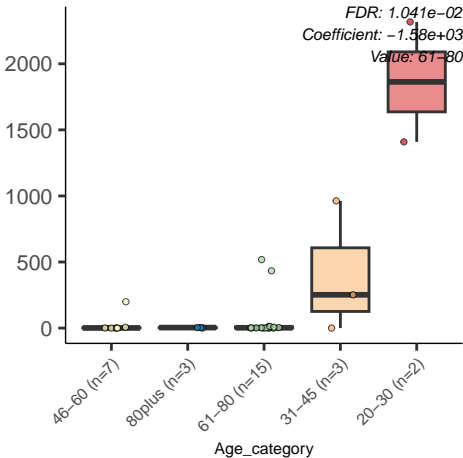

ollicutes.o\_\_Mycoplasmatales.f\_\_Mycoplasmataceae.g\_\_Mycoplasma

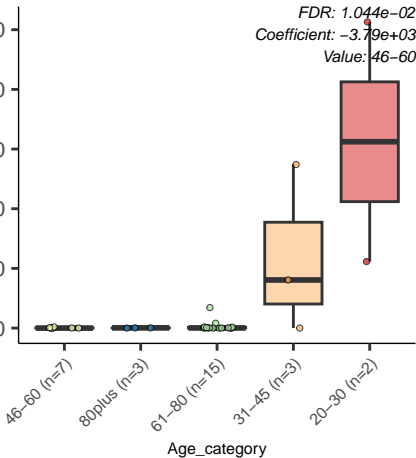

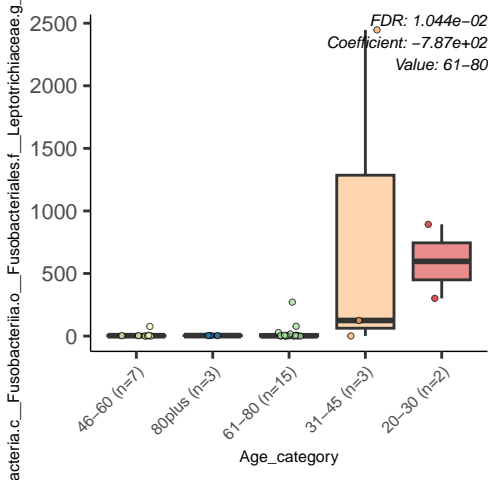

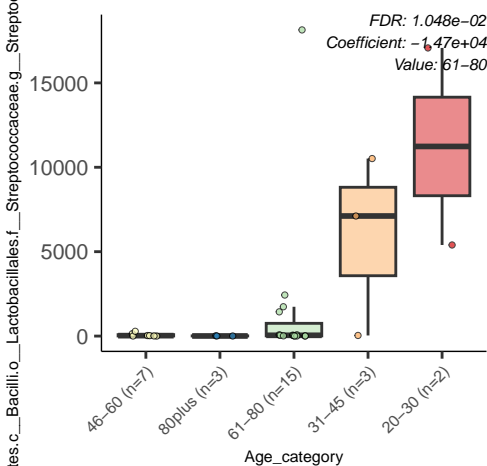

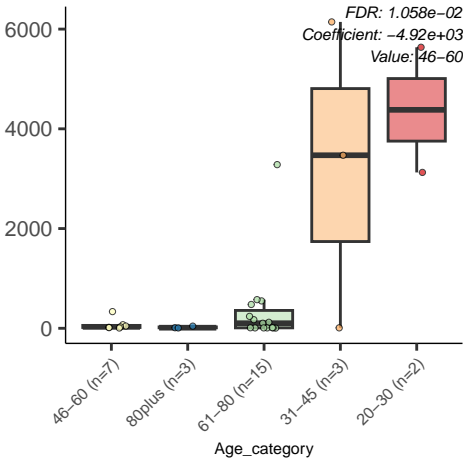

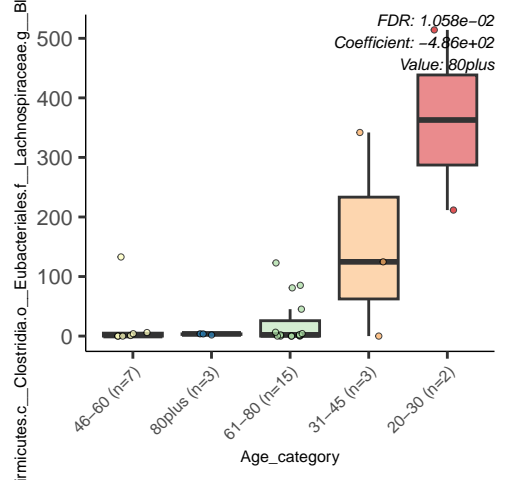



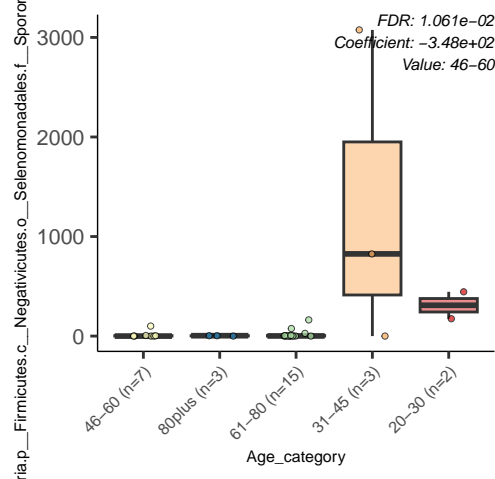

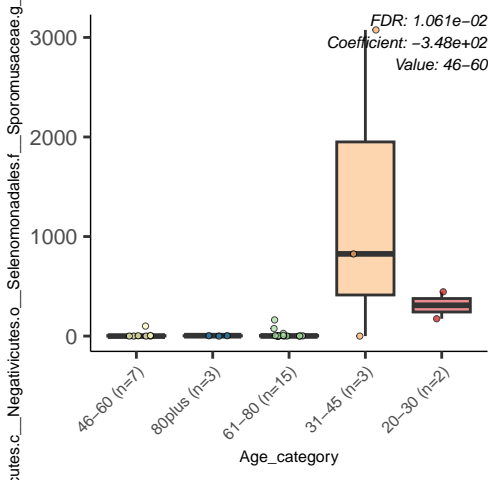

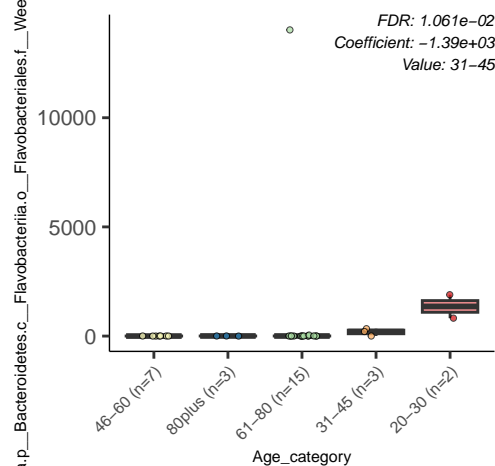

eroidetes.c\_\_Flavobacteriia.o\_\_Flavobacteriales.f\_\_Weeksellaceae,

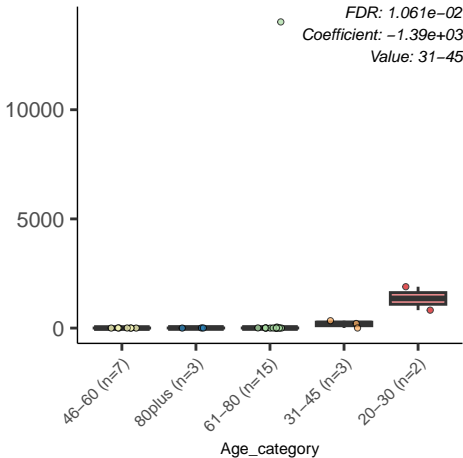

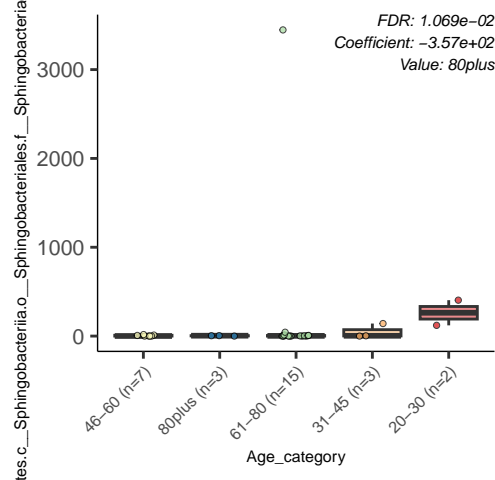

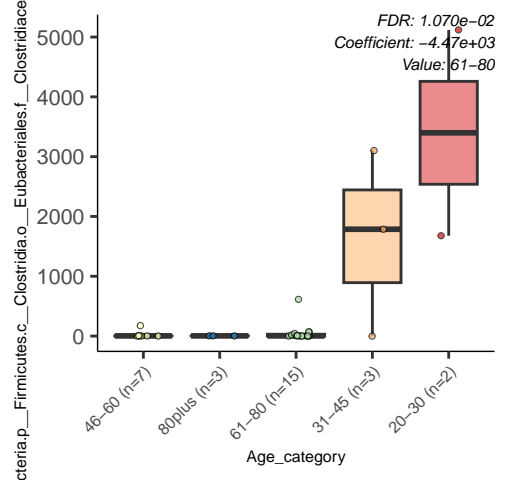

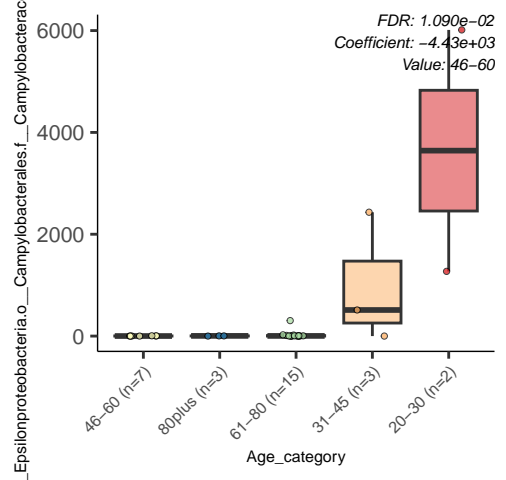

acteria.p\_\_Firmicutes.c\_\_Clostridia.o\_\_Eubacteriales.f\_\_Oscillospiraceae

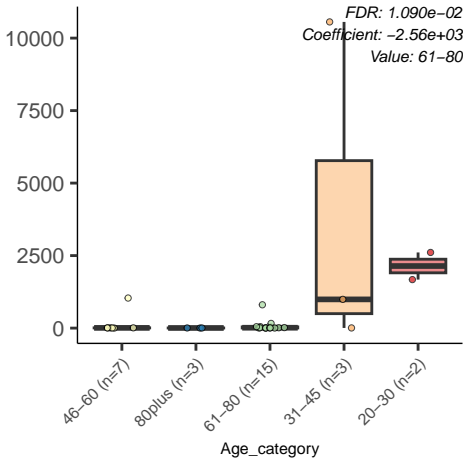



a.p\_\_Bacteroidetes.c\_\_Flavobacteriia.o\_\_Flavobacteriales.f\_\_Flavob

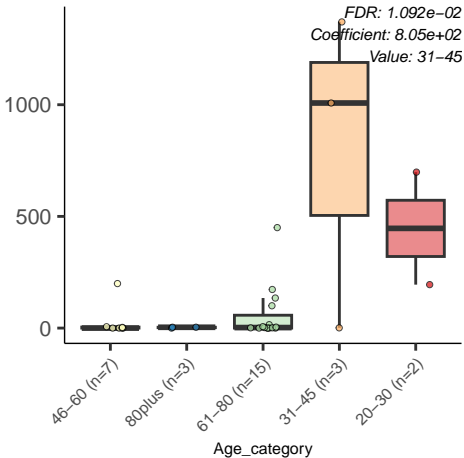

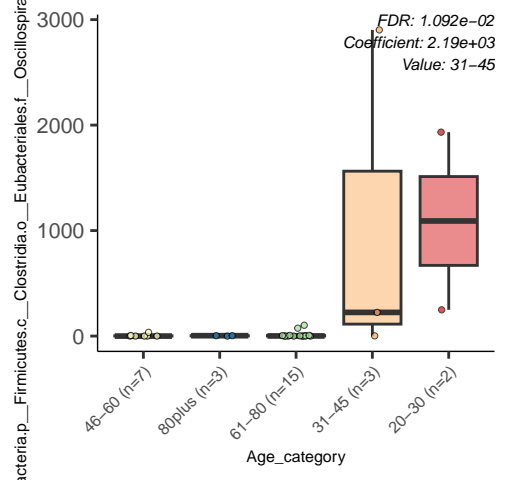

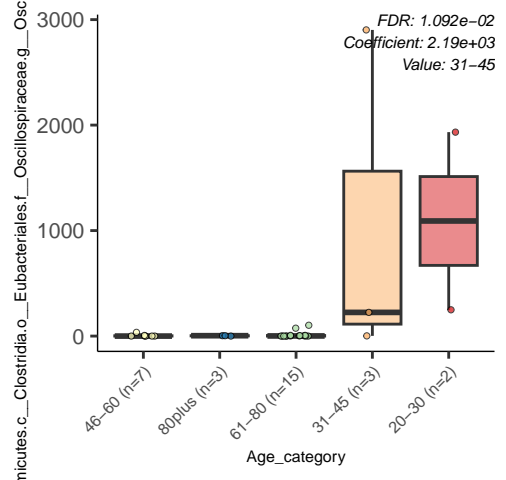

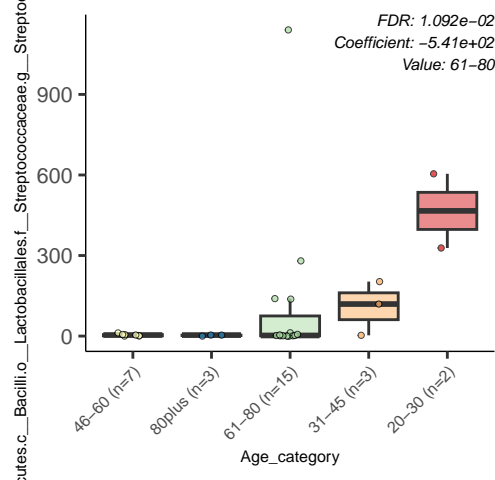

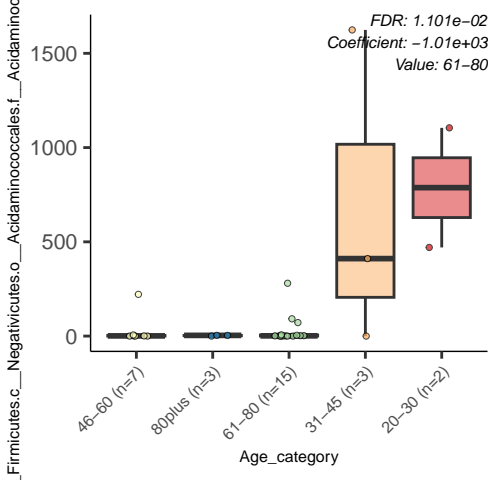

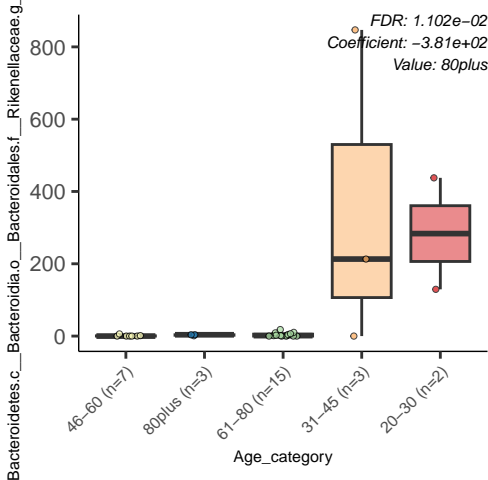

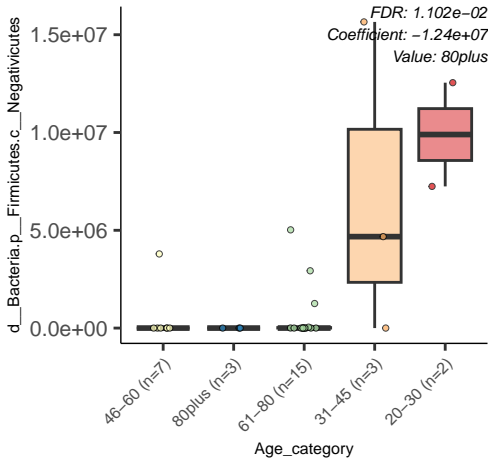

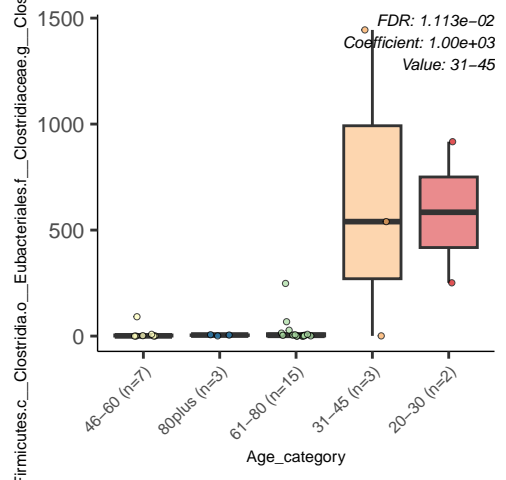



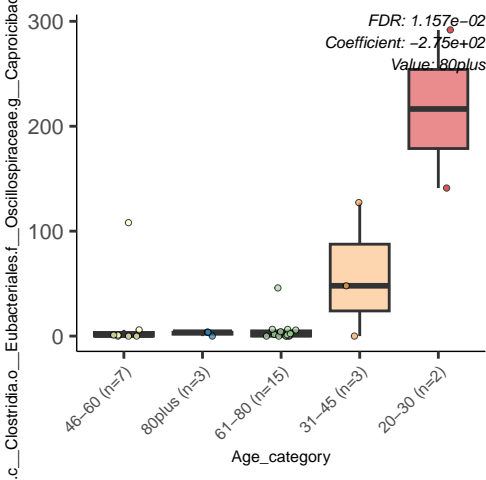

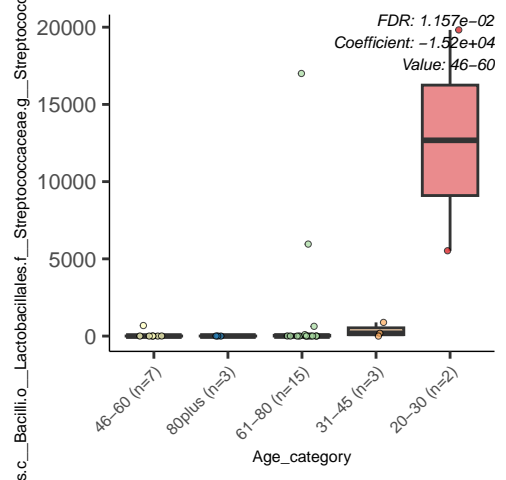

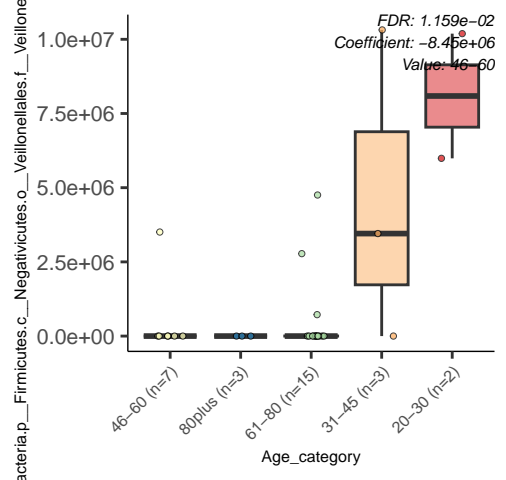

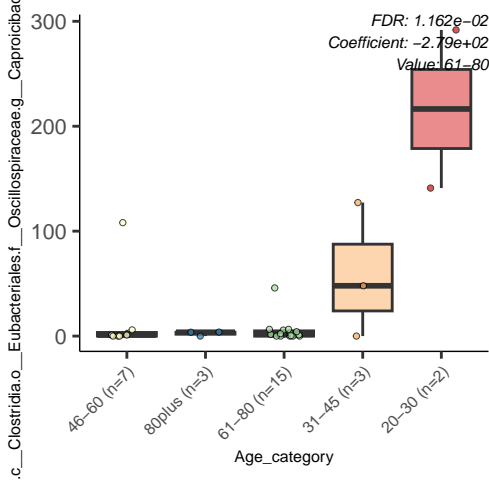

Bacteria.p\_Actinobacteria.c\_Actinomycetia.o\_Propionibacteriales

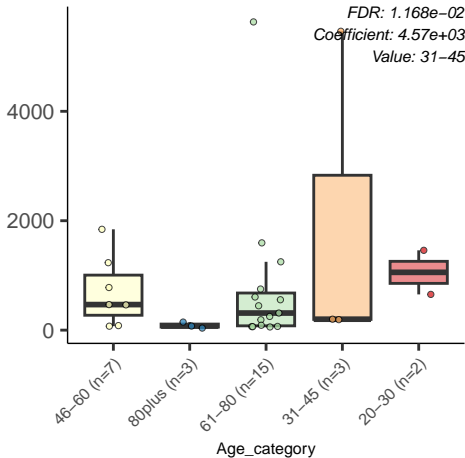

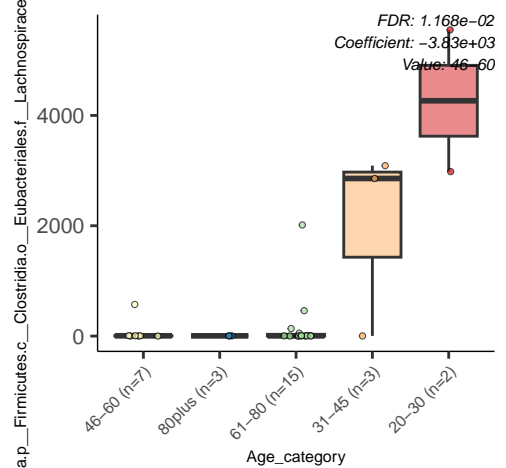

oidetes.c\_\_Bacteroidia.o\_\_Bacteroidales.f\_\_Bacteroidaceae.g\_\_Ba

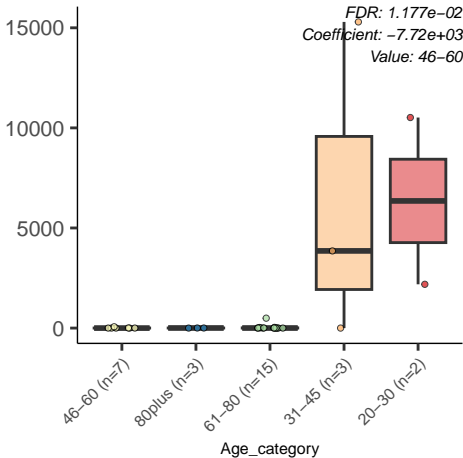

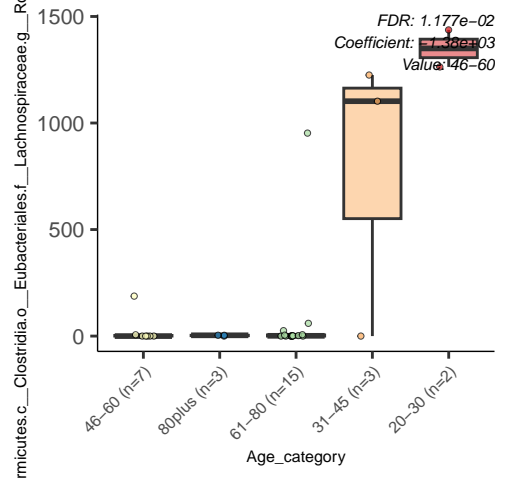



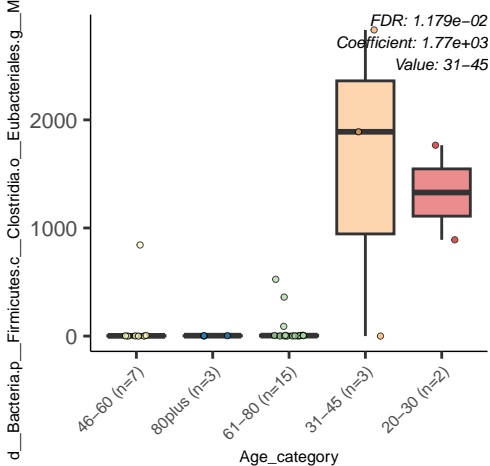

p\_\_Firmicutes.c\_\_Clostridia.o\_\_Eubacteriales.g\_\_Massilistercora.s

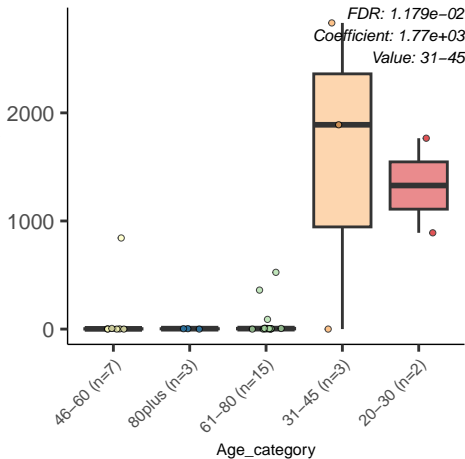

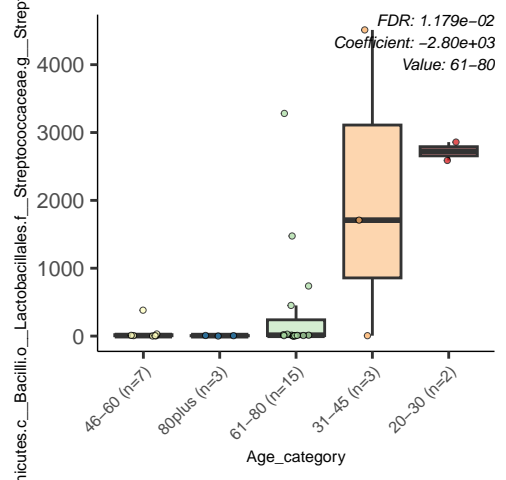

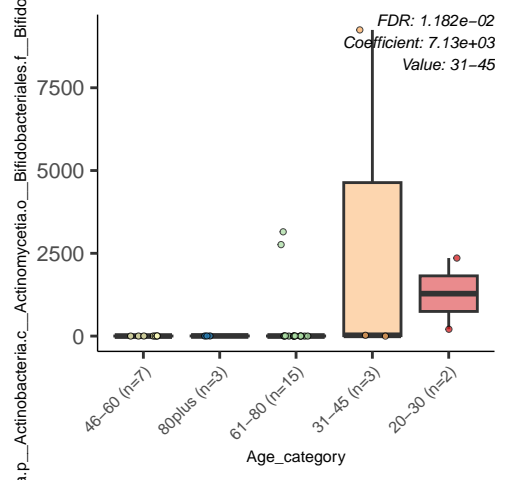

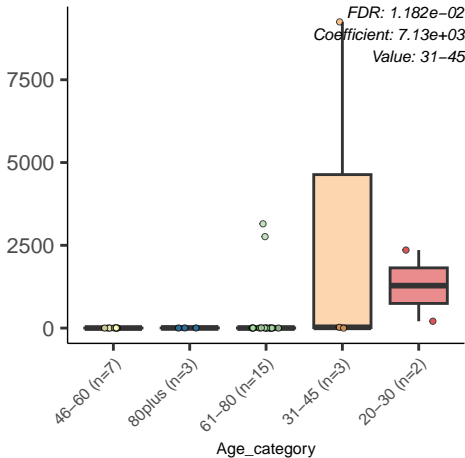

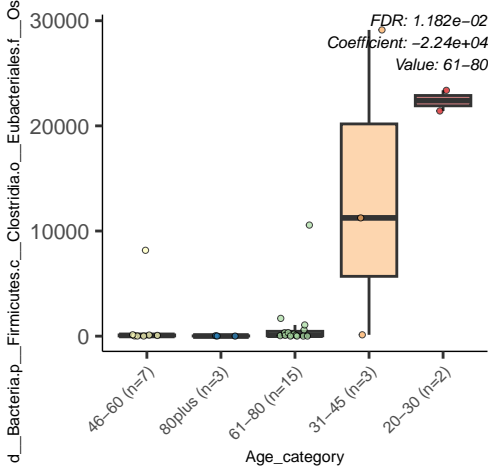

d\_\_Bacteria.p\_\_Chlorobi

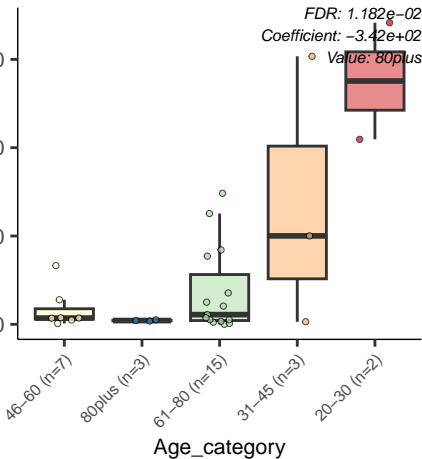

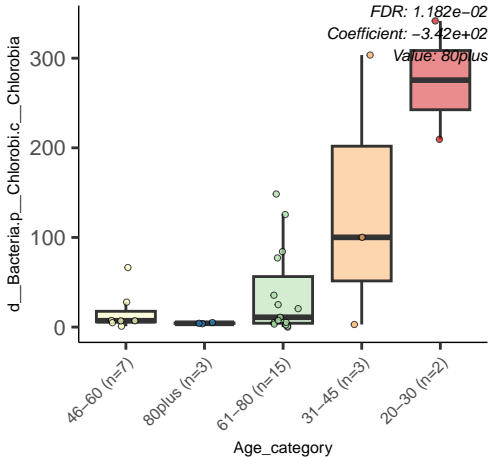



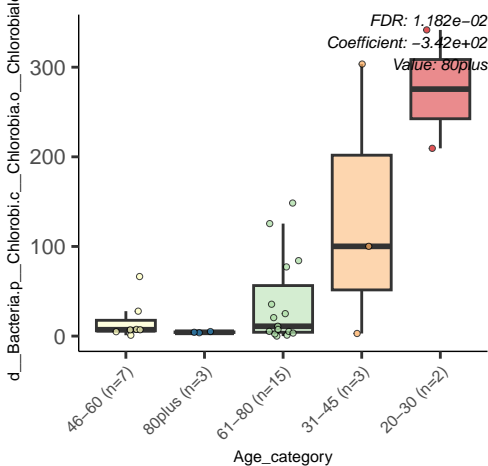

d\_\_Bacteria.p\_\_Chlorobi.c\_\_Chlorobia.o\_\_Chlorobiales.f\_\_Ch

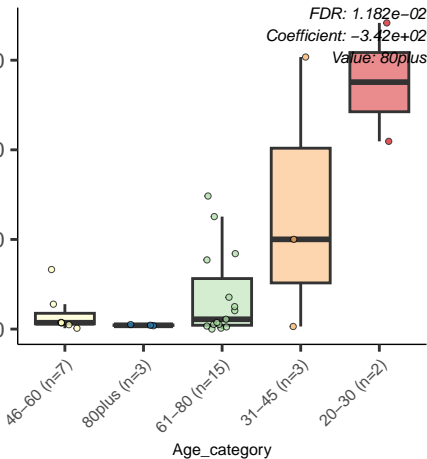

ites.c\_\_Clostridia.o\_\_Eubacteriales.f\_\_Lachnospiraceae.g\_\_Mediterr

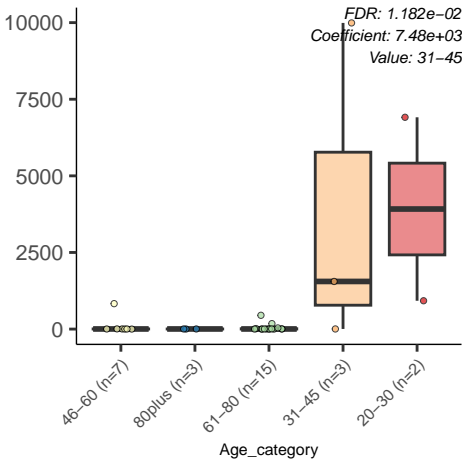

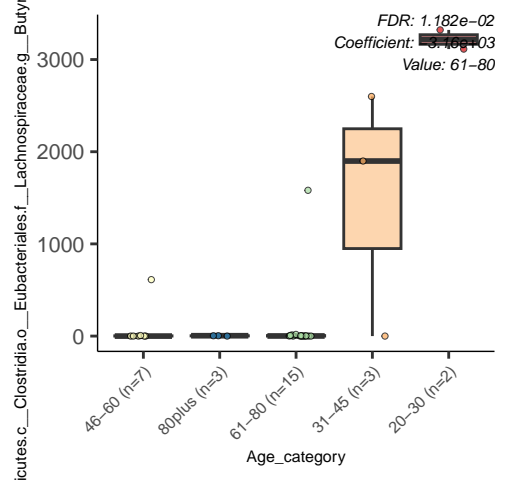

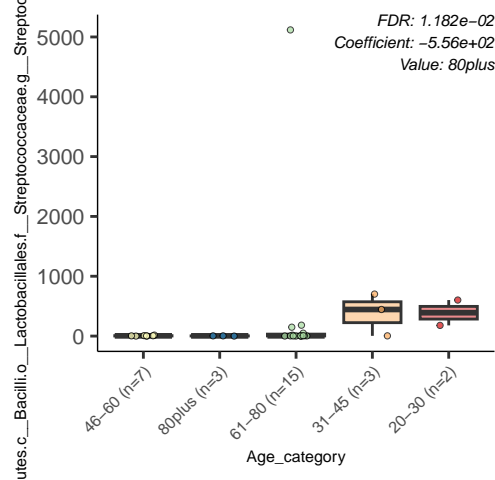

maproteobacteria.o\_\_Cardiobacteriales.f\_\_Cardiobacteriaceae.g\_\_C

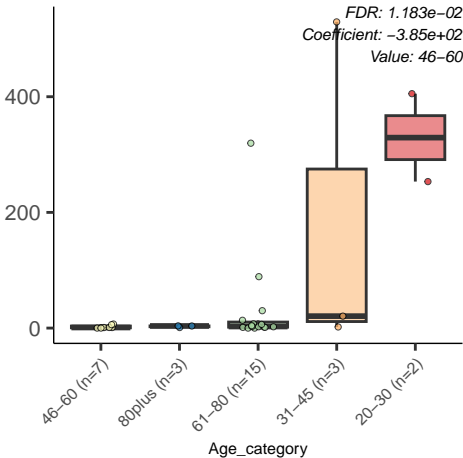

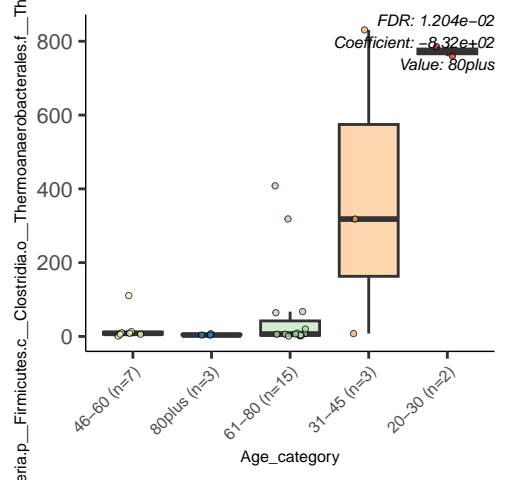

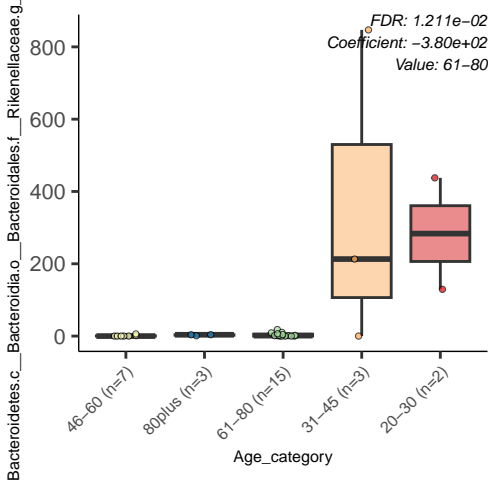



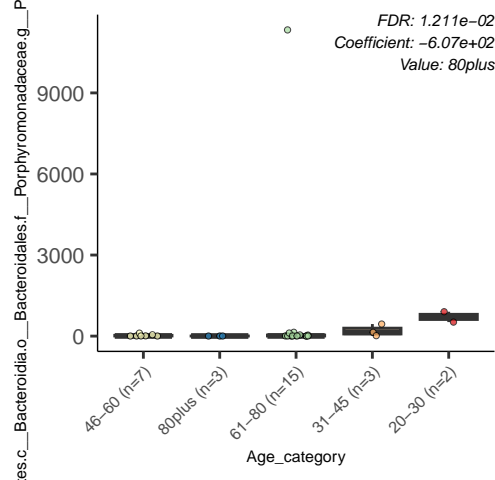

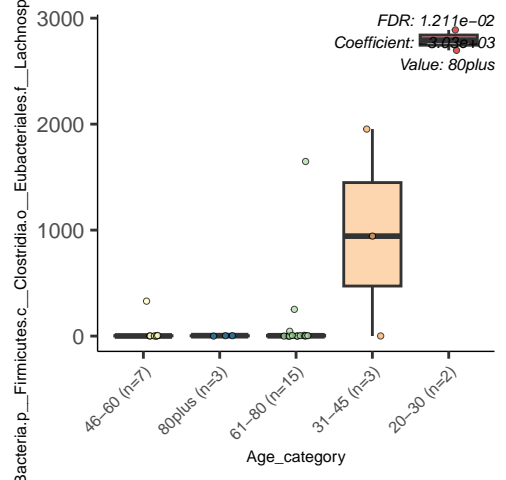

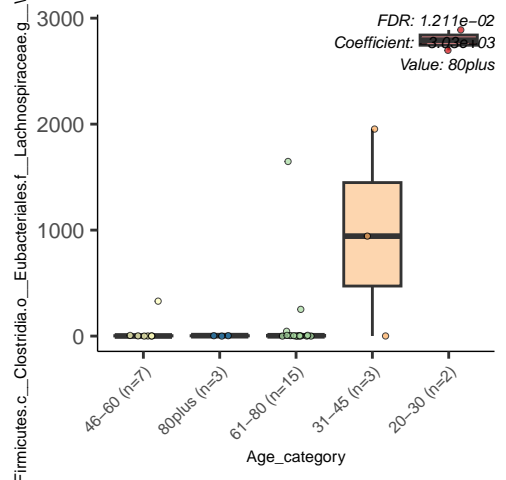

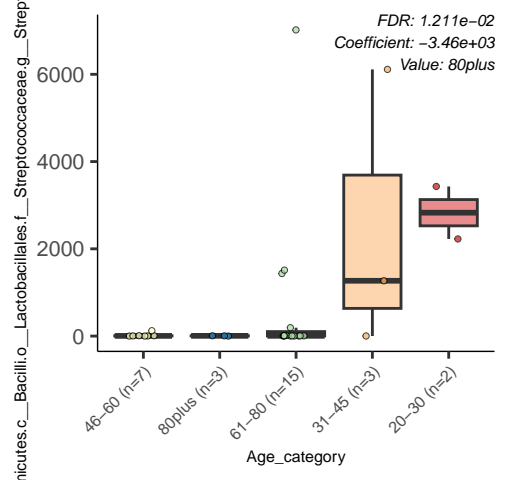

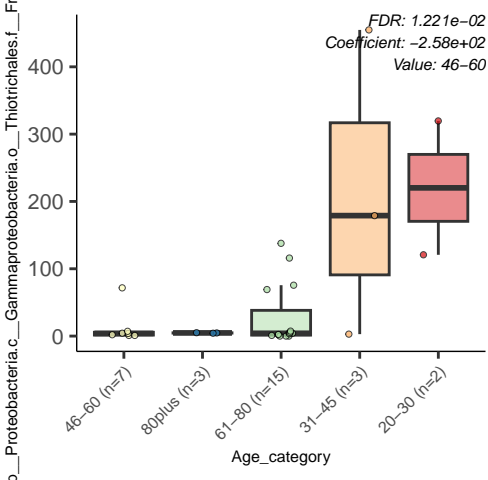

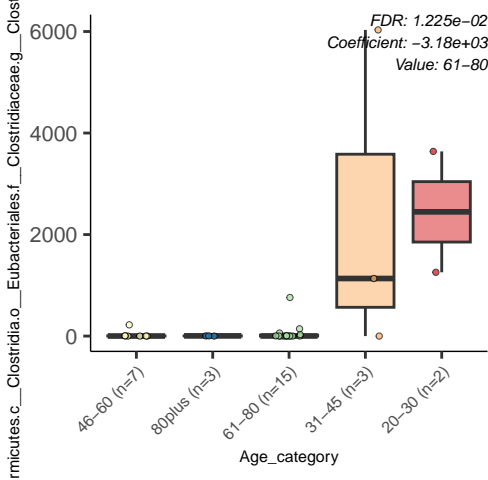

Oligoflexia.o\_\_Bacteriovorales.f\_\_Halobacteriovoraceae.g\_\_Hal

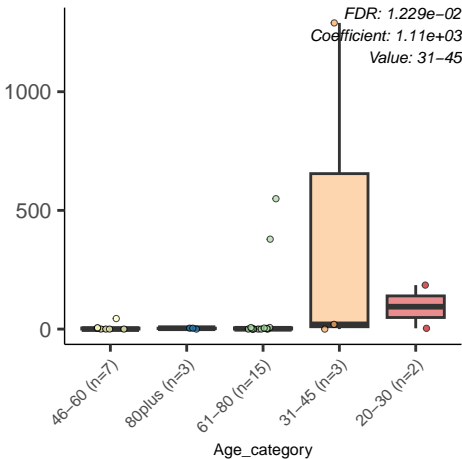

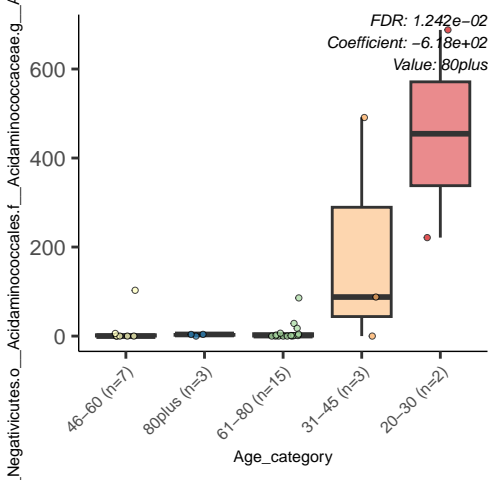



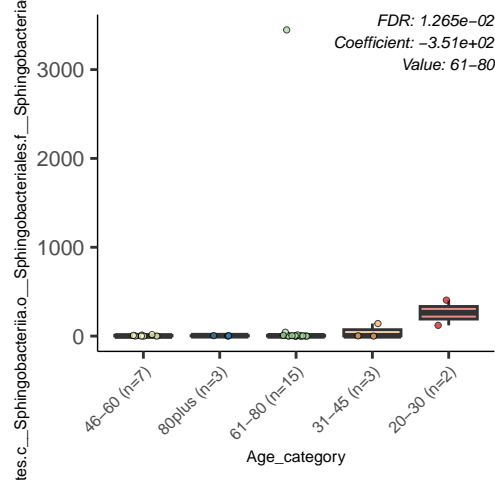

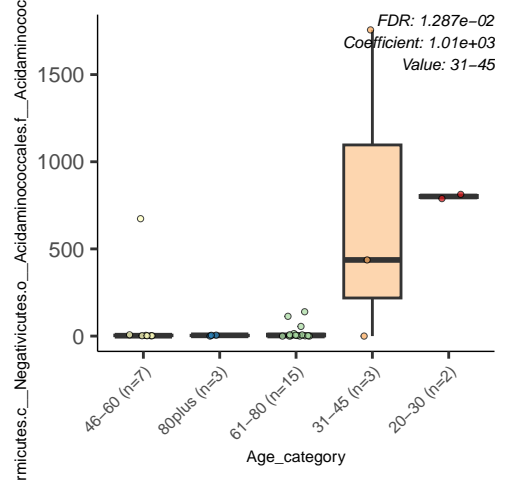

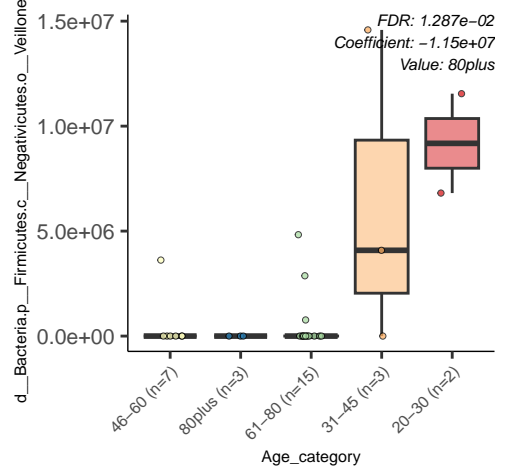

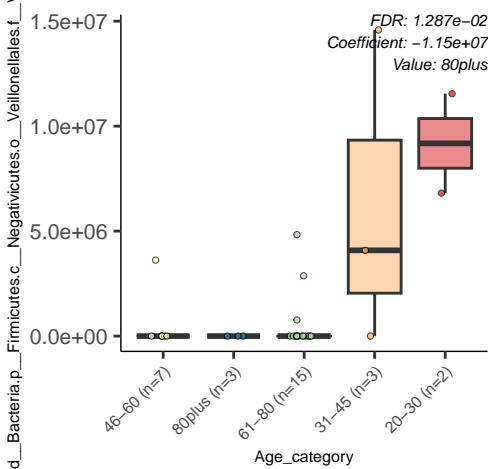

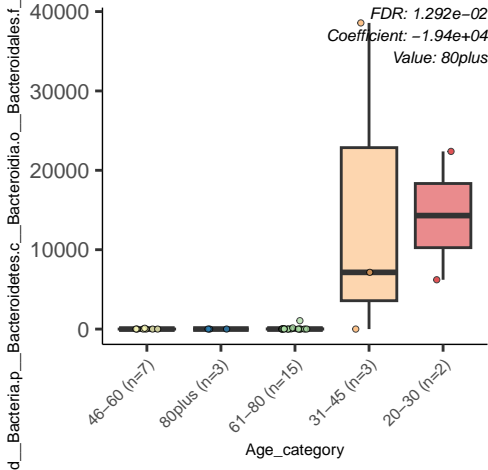

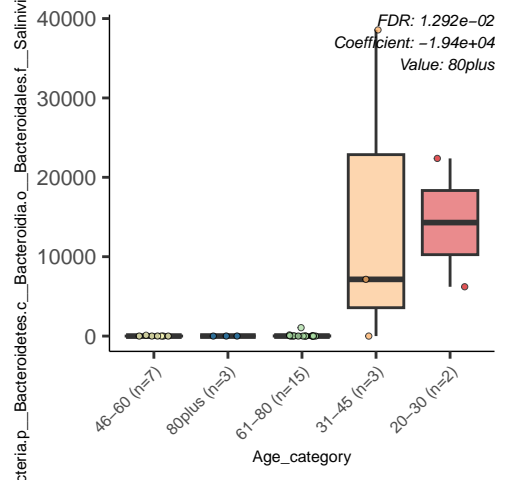

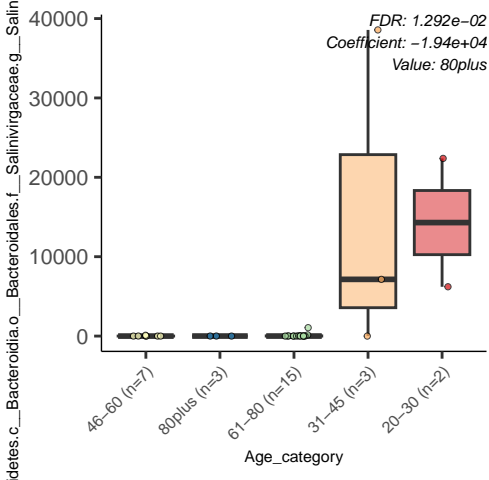

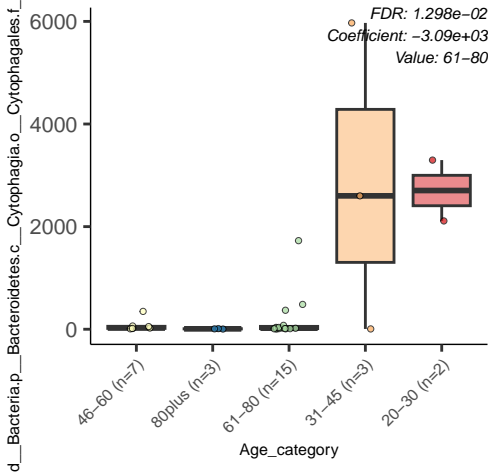



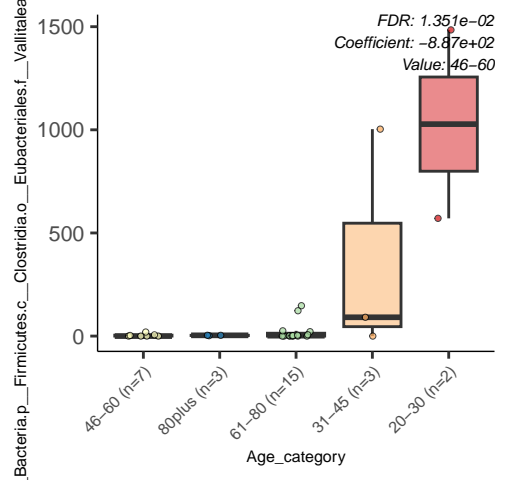

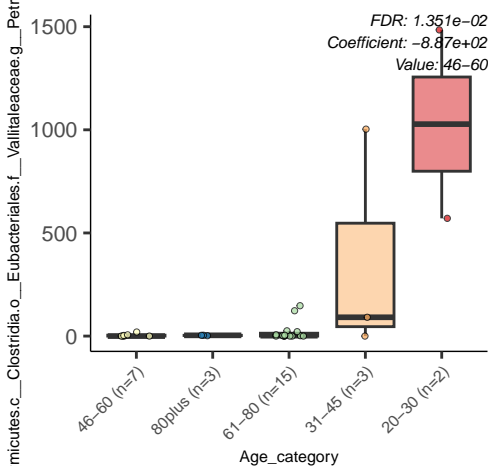

\_\_Bacteroidetes.c\_\_Flavobacteriia.o\_\_Flavobacteriales.f\_\_Flavobac

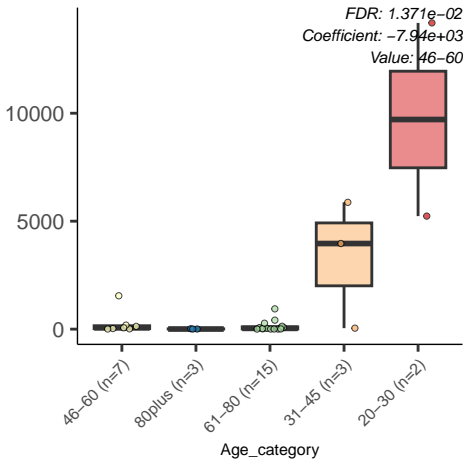

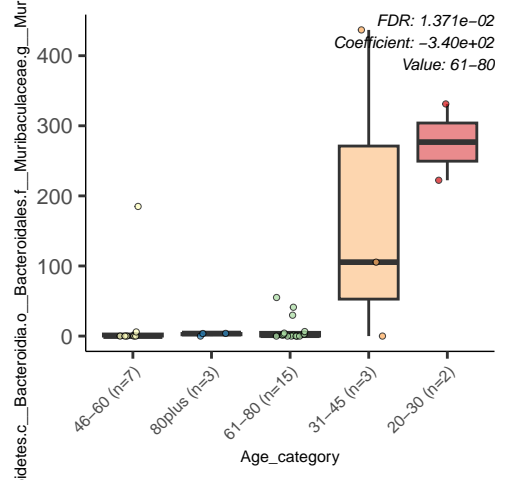

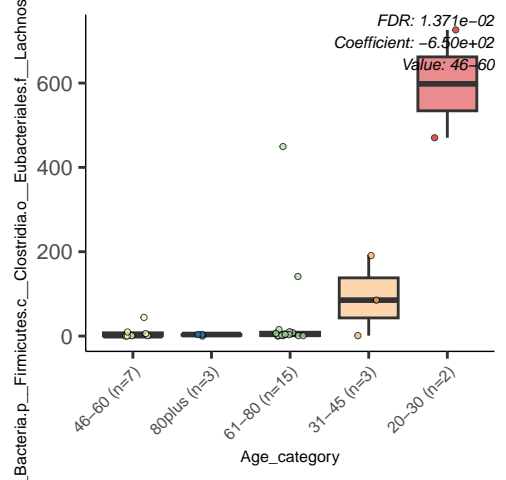

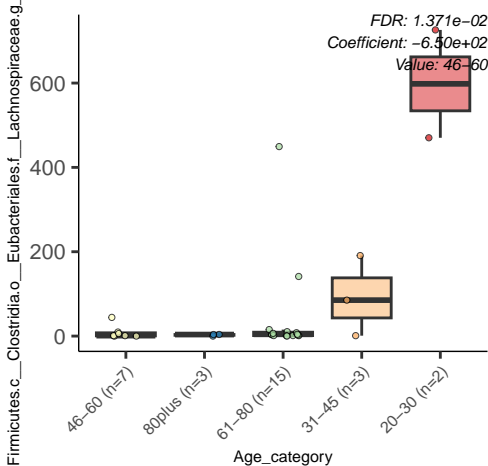

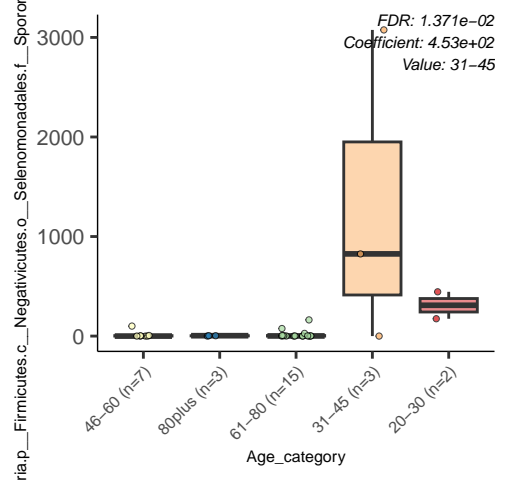

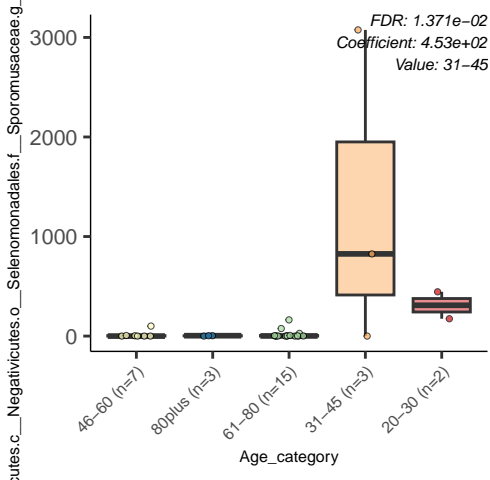



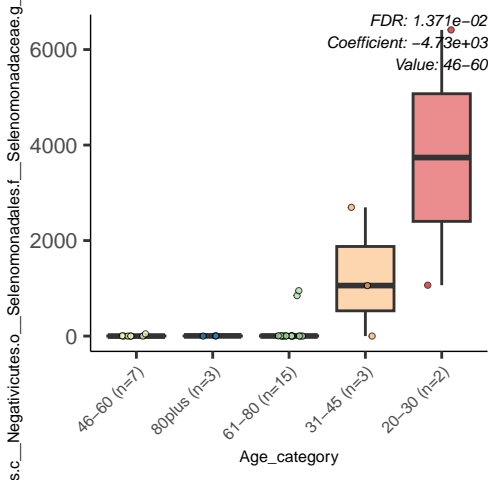

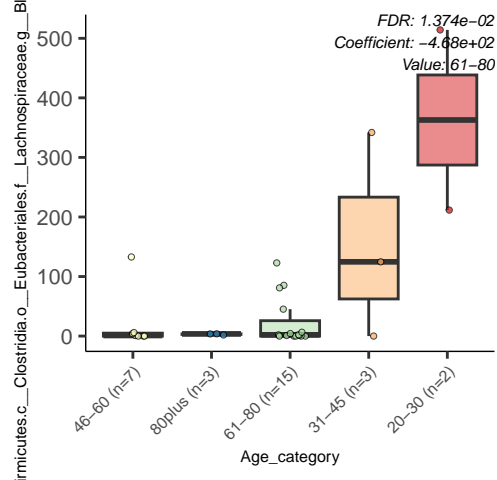

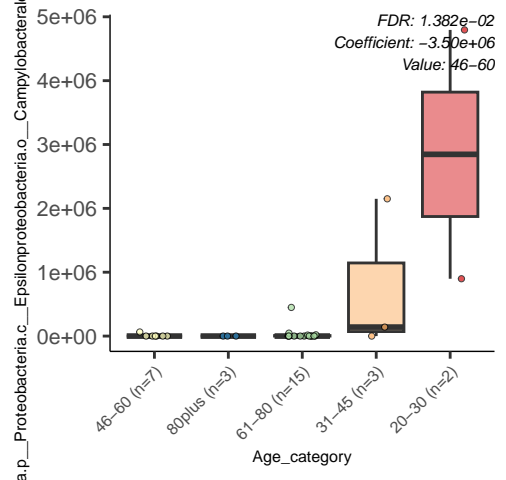

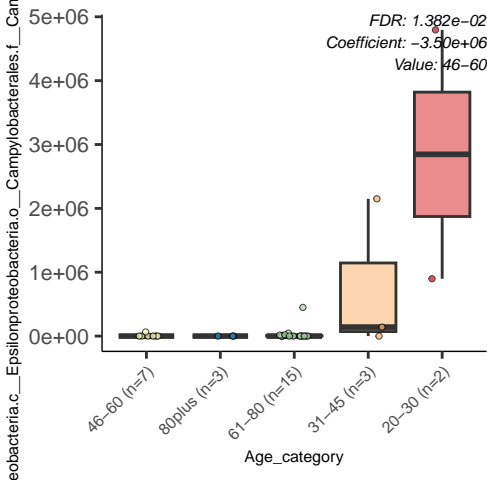

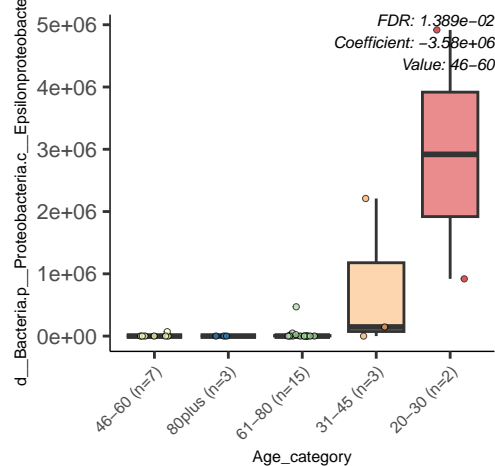

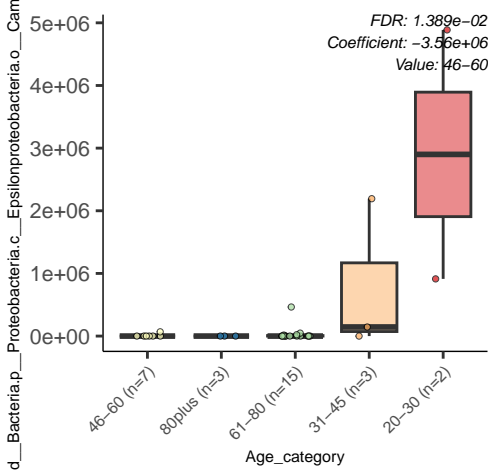

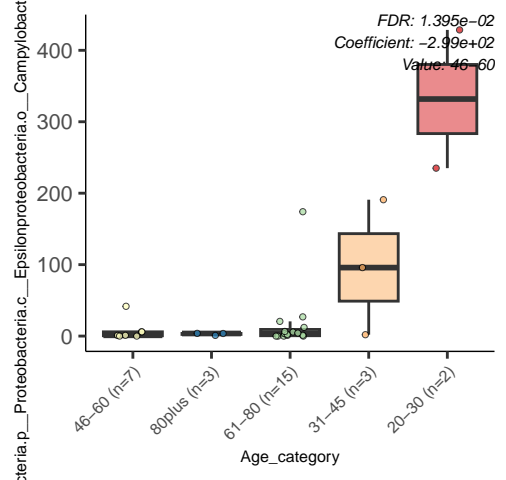

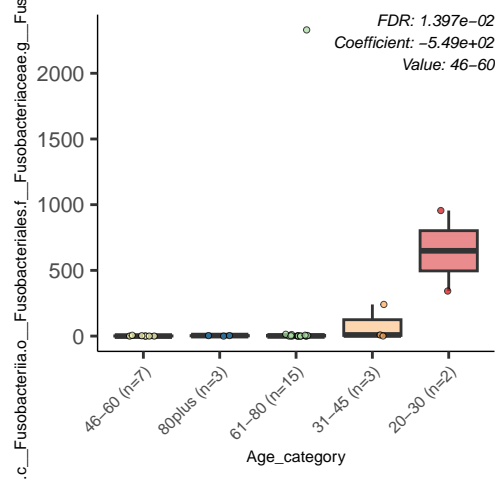



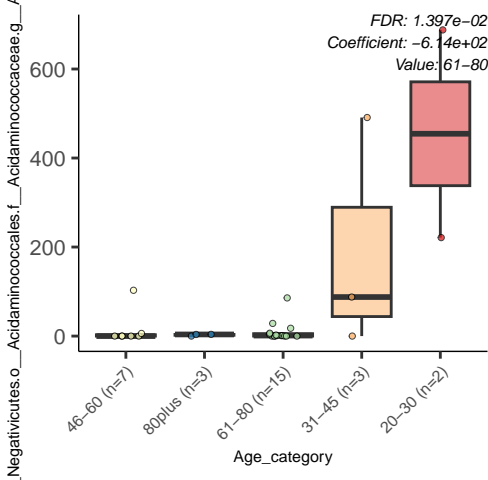

bacteria.p\_\_Proteobacteria.c\_\_Gammaproteobacteria.o\_\_Thiotrichales

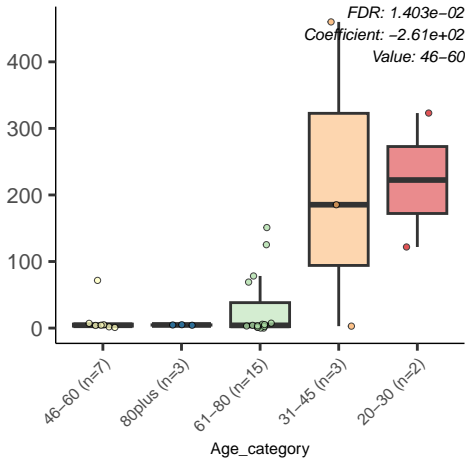

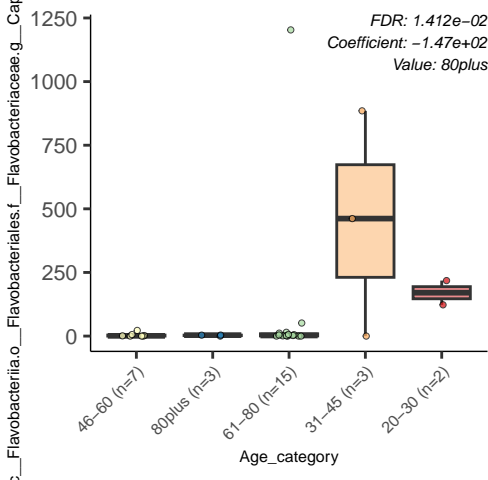

tertia.p\_\_Bacteroidetes.c\_\_Bacteroidia.o\_\_Bacteroidales.f\_\_Barnesi

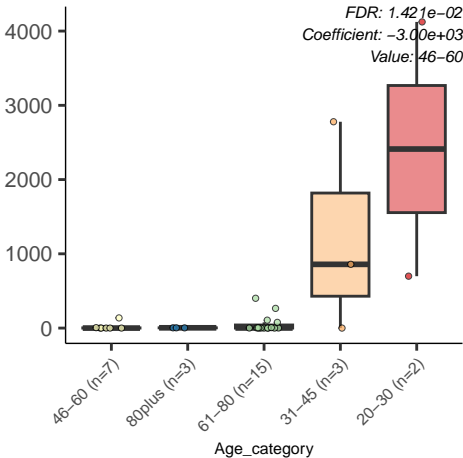

eroidetes.c\_\_Bacteroidia.o\_\_Bacteroidales.f\_\_Barnesiellaceae.g\_\_B

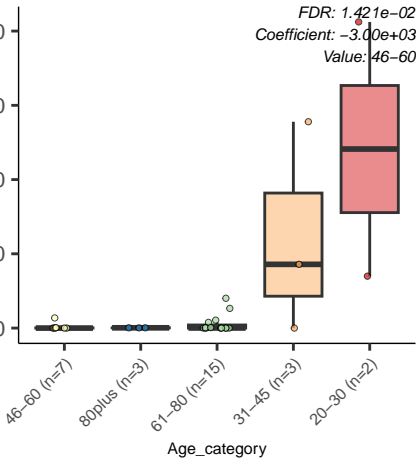

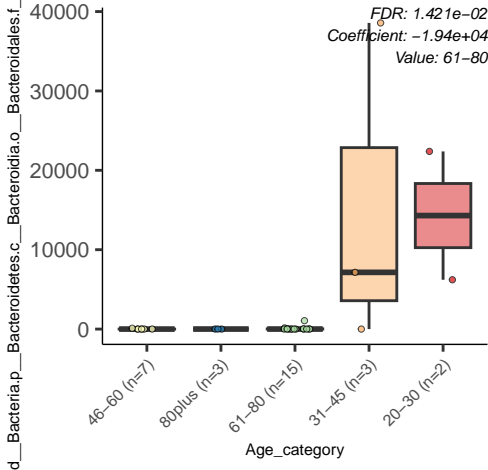

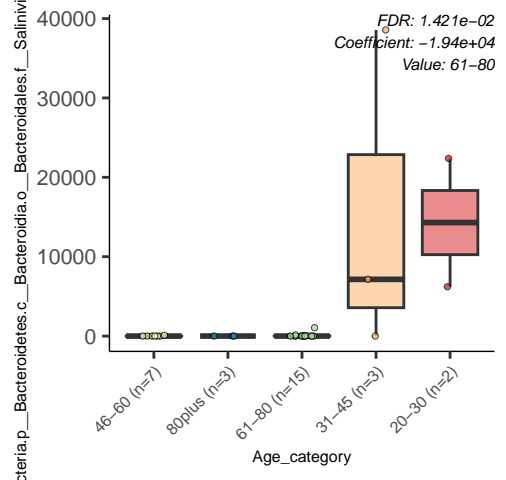

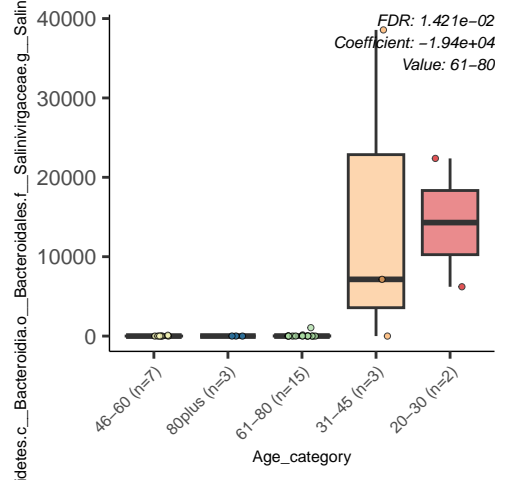



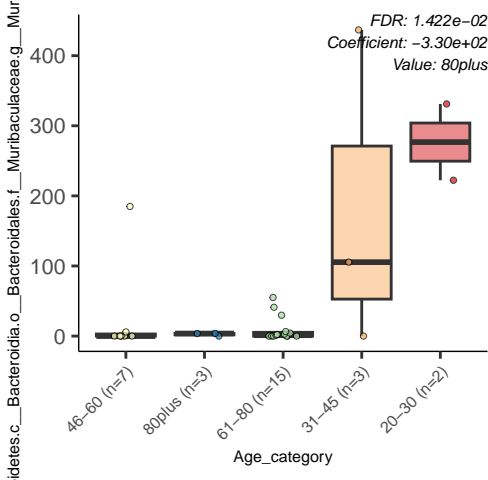

ria.p\_\_Firmicutes.c\_\_Clostridia.o\_\_Eubacteriales.f\_\_Lachnospirace

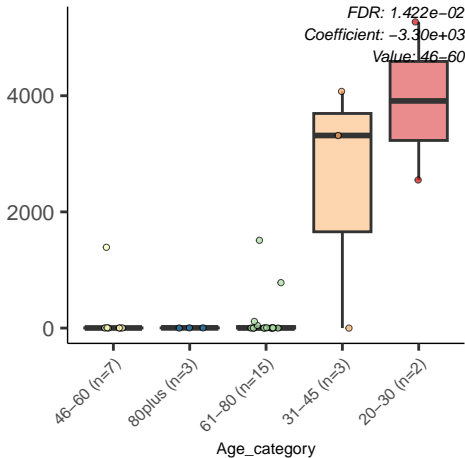

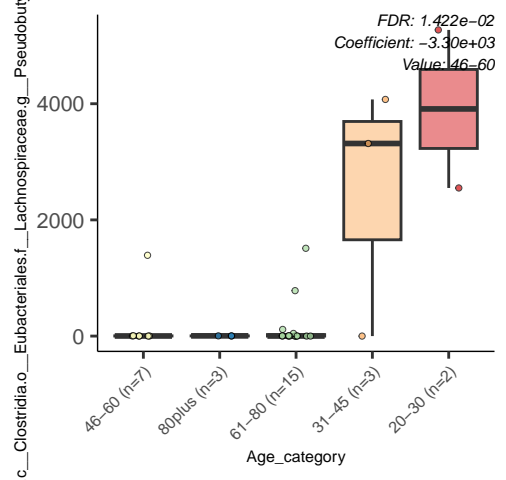

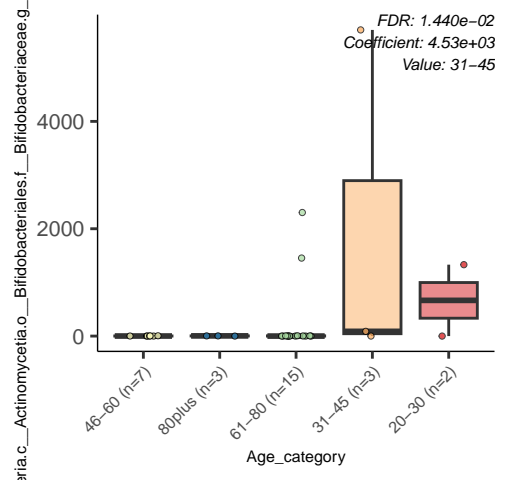

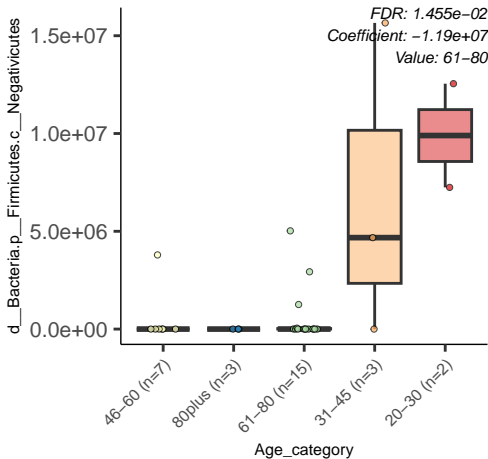

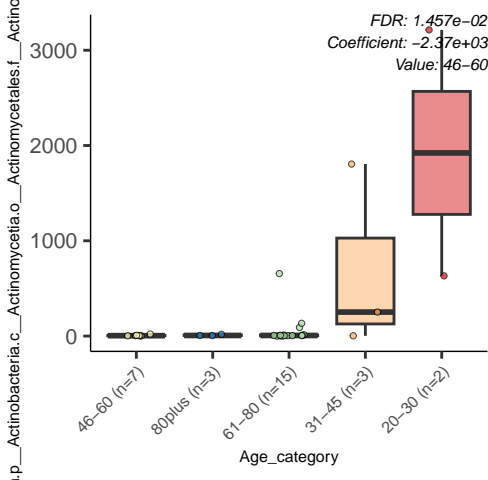

c\_Actinomycetia.o\_Propionibacteriales.f\_Propionibacteriaceae.g

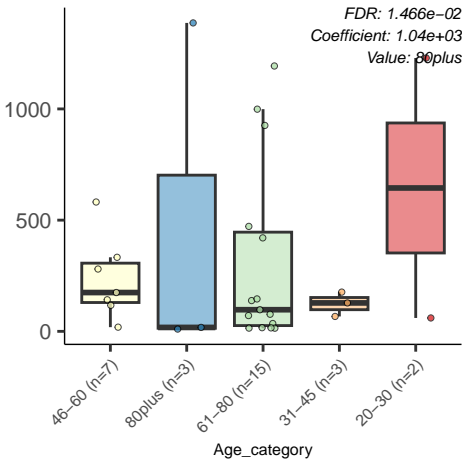

\_\_Epsilonproteobacteria.o\_\_Campylobacteriales.f\_\_Campylobacter

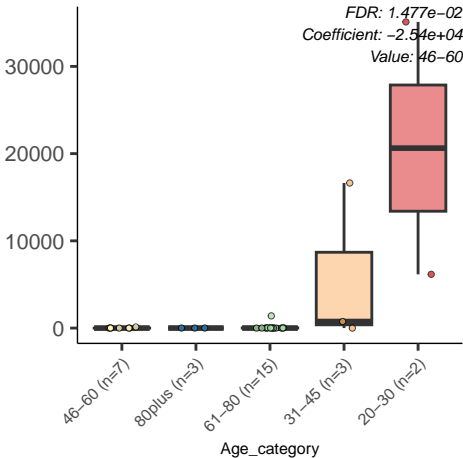



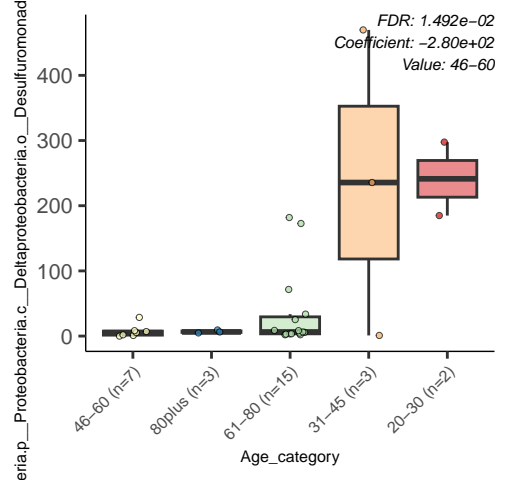

Epsilonproteobacteria.o\_\_Campylobacteriales.f\_\_Campylobacteraceae

FDR:  $1.562 \times 10^{-2}$   
Coefficient:  $-1.36 \times 10^6$   
Value: 46-60

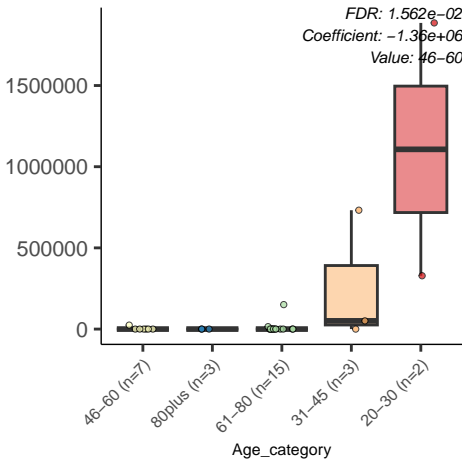

bacteria.c\_\_Fusobacteriia.o\_\_Fusobacteriales.f\_\_Leptotrichiaceae.g\_\_

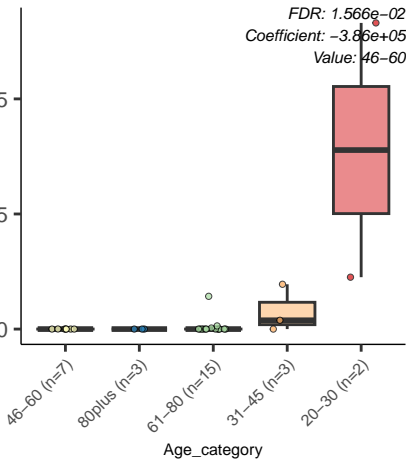

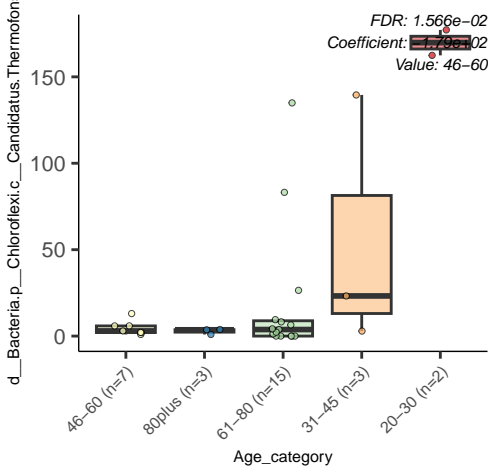

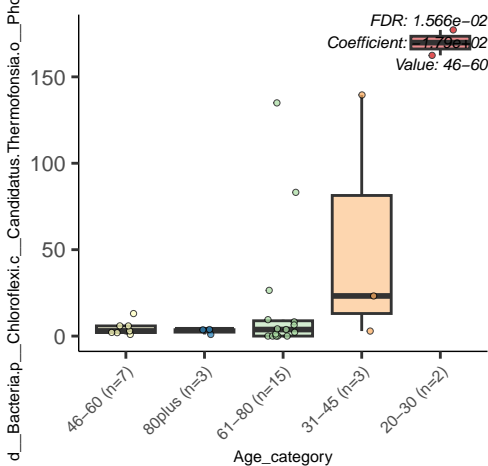

eria.p\_\_Chloroflexi.c\_\_Candidatus.Thermofonsia.o\_\_Phototrophical

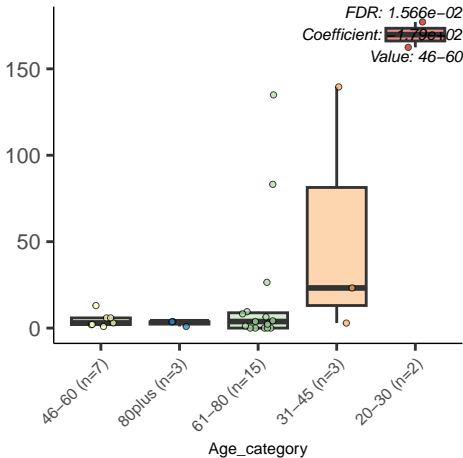

Chloroflexi.c\_\_Candidatus.Thermofonsia.o\_\_Phototrophicales.f\_\_Pho

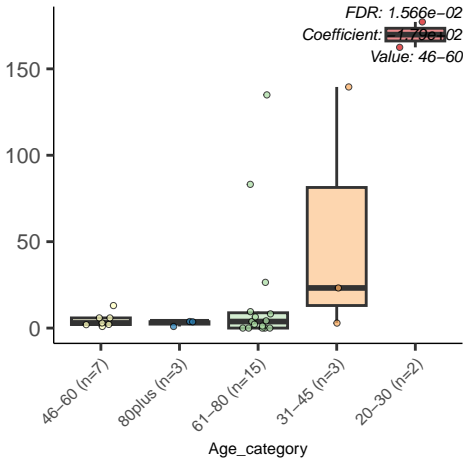

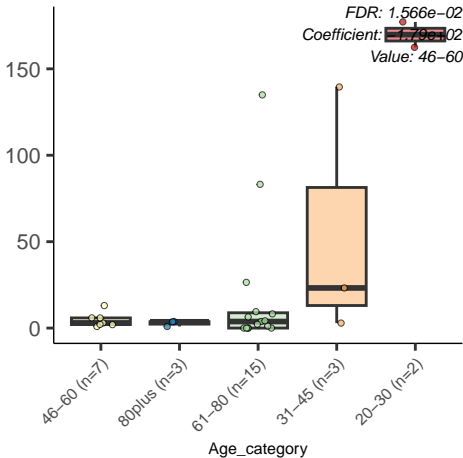



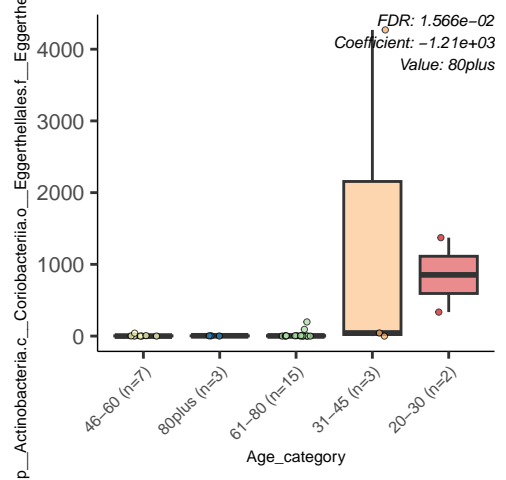

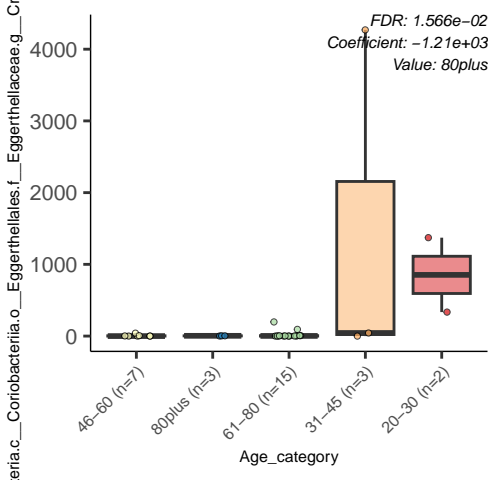

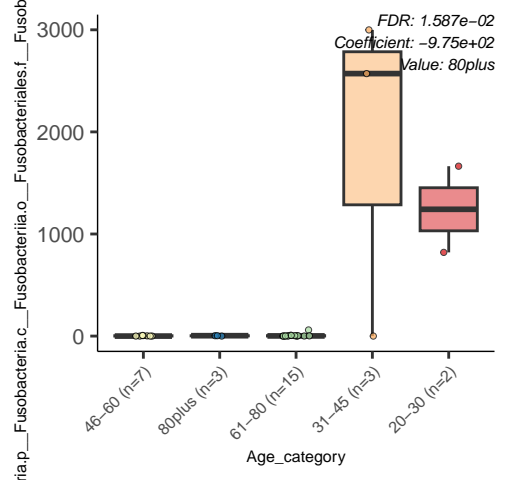

bacteria.c\_\_Fusobacteriia.o\_\_Fusobacteriales.f\_\_Fusobacteriaceae.

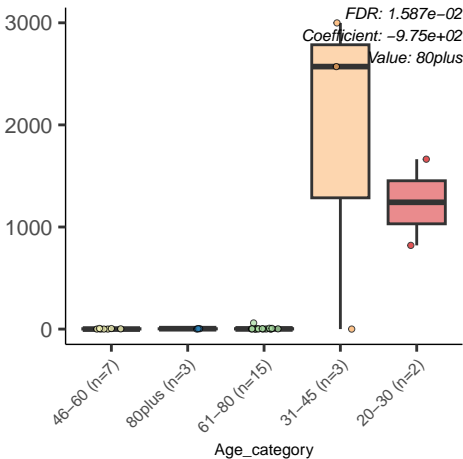

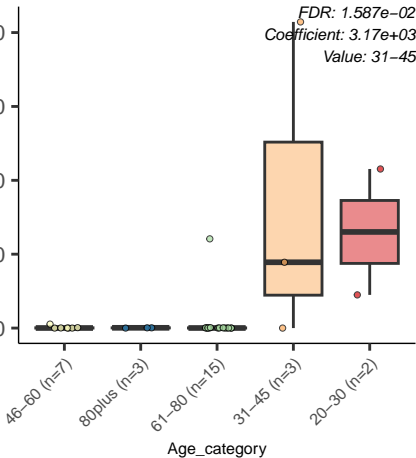

bacteria.c\_\_Actinomycetia.o\_\_Micrococcales.f\_\_Dermatophilaceae.

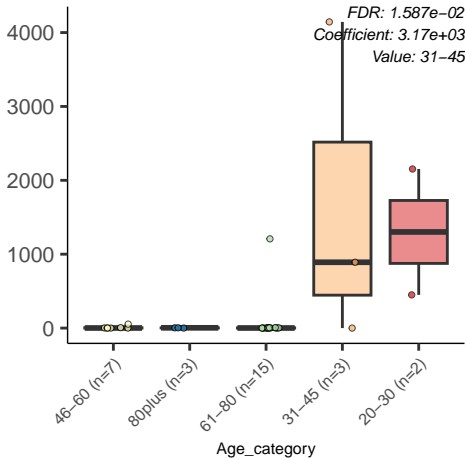

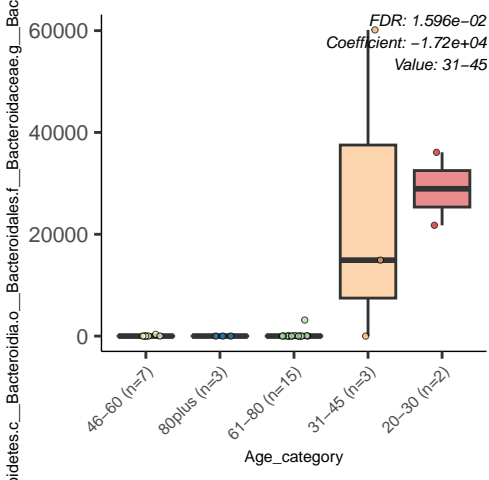

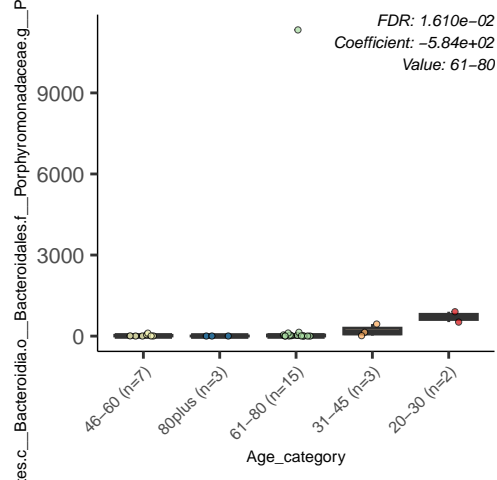



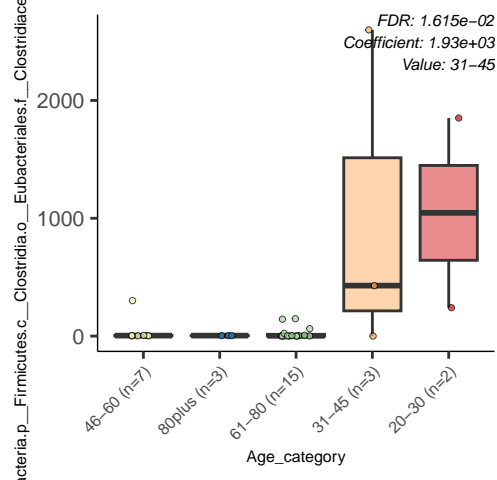

icutes.c\_\_Clostridia.o\_\_Eubacteriales.f\_\_Clostridiaceae.g\_\_Serpen

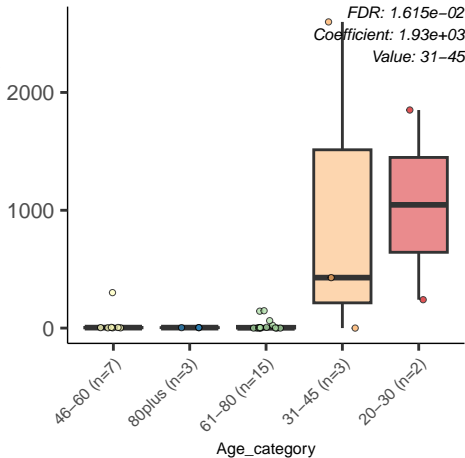

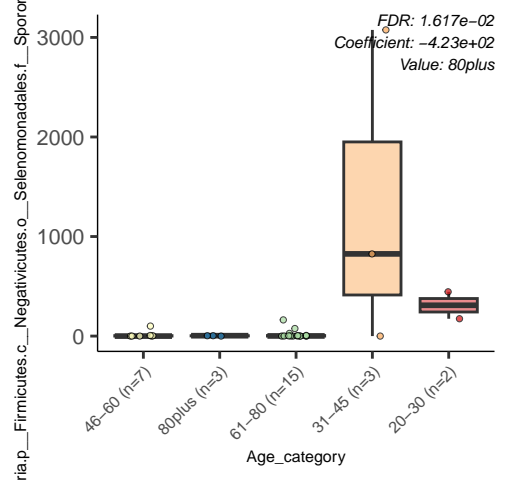

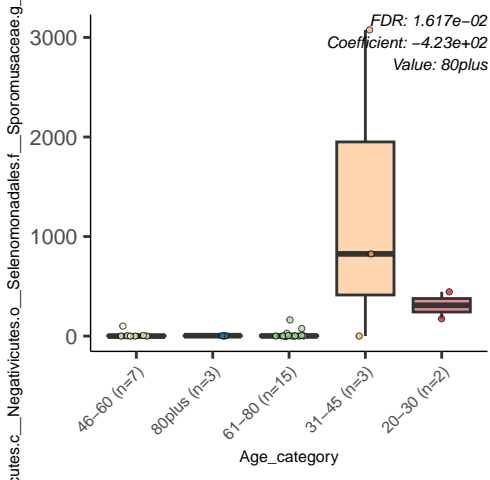

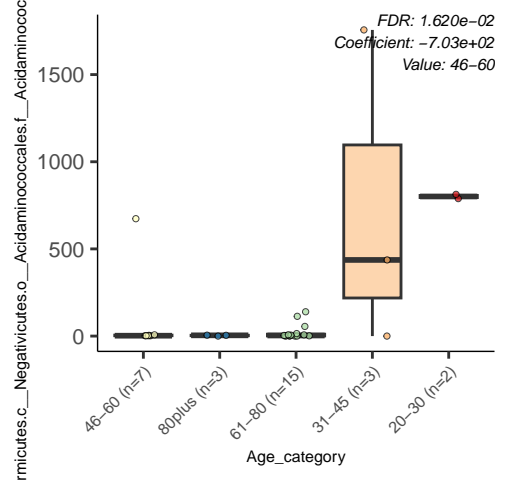

bacteria.p\_\_Proteobacteria.c\_\_Betaproteobacteria.o\_\_Neisseriales.f

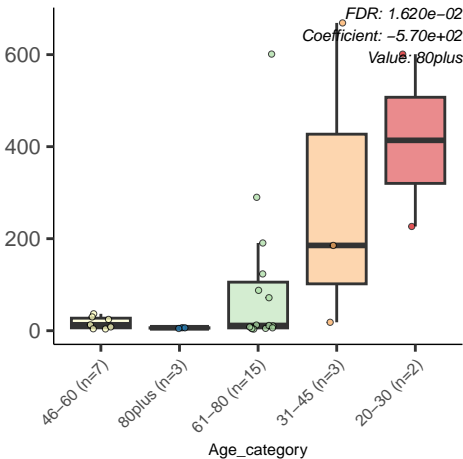

c\_\_Clostridia.o\_\_Eubacteriales.f\_\_Eubacteriales.Family.XIII...Incerta

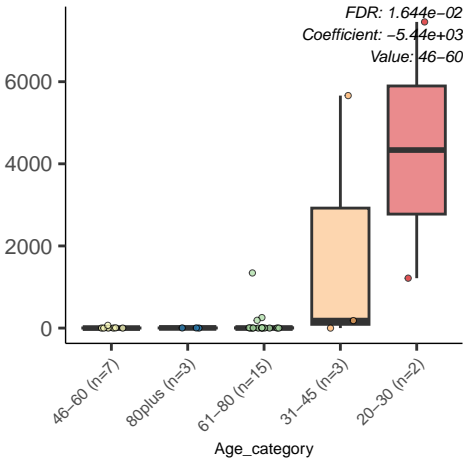

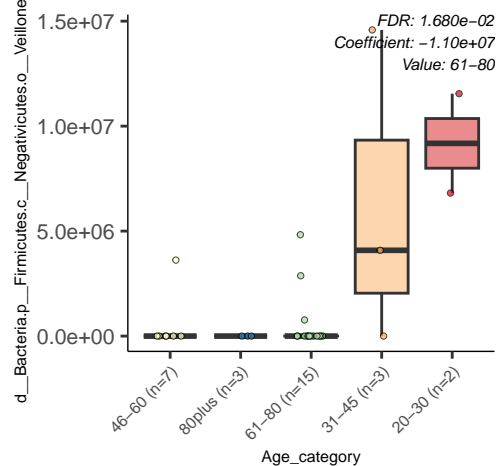



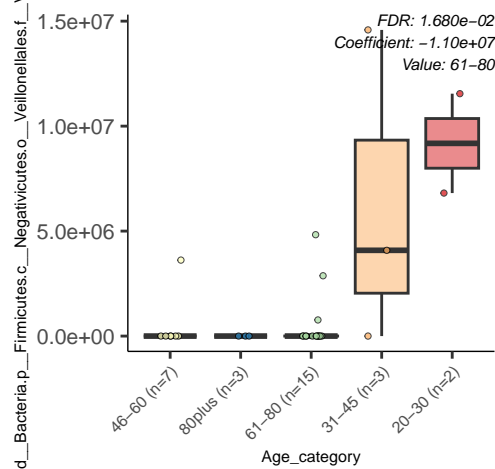

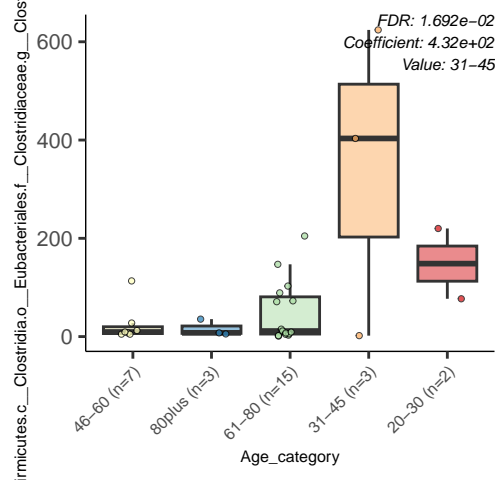

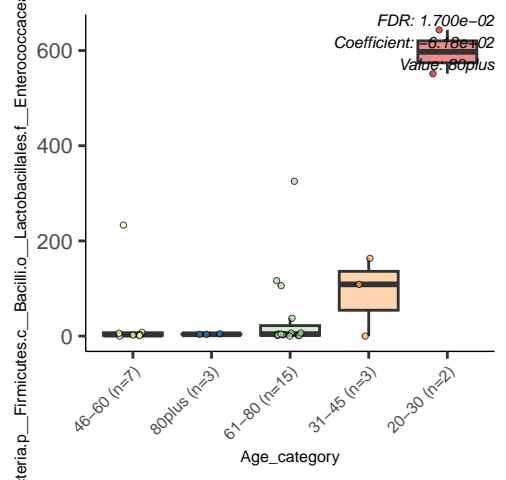

c\_Flavobacteriia.o\_Flavobacteriales.f\_Flavobacteriaceae.g\_Ca

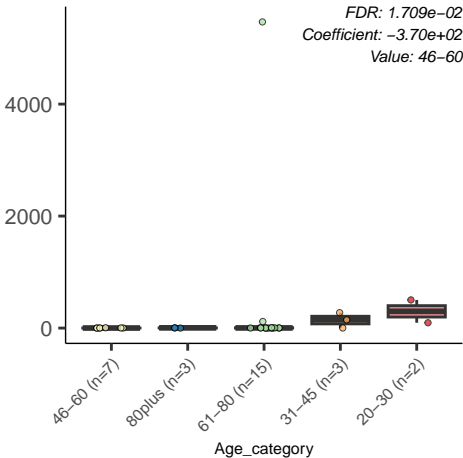

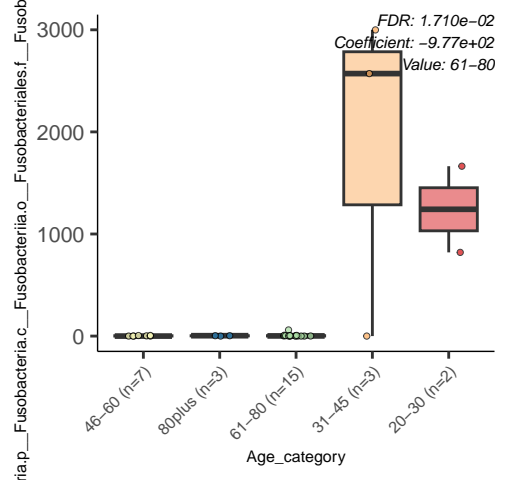

bacteria.c\_\_Fusobacteriia.o\_\_Fusobacteriales.f\_\_Fusobacteriaceae.

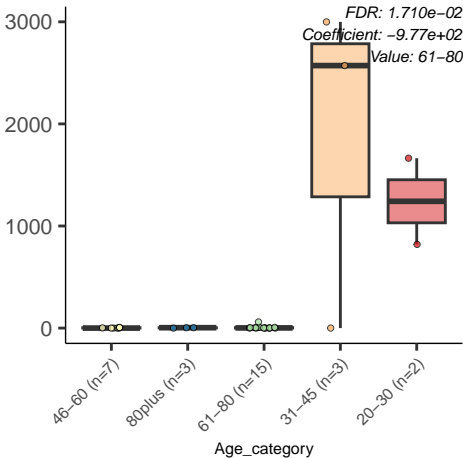

micutes.c\_\_Bacilli.o\_\_Lactobacillales.f\_\_Streptococcaceae.g\_\_Streptococcus

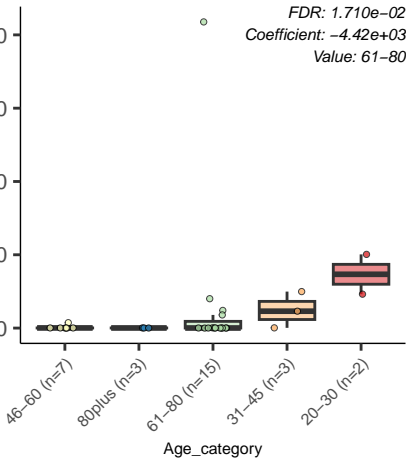

bacteria.c\_\_Fusobacteriia.o\_\_Fusobacteriales.f\_\_Leptotrichiaceae.g

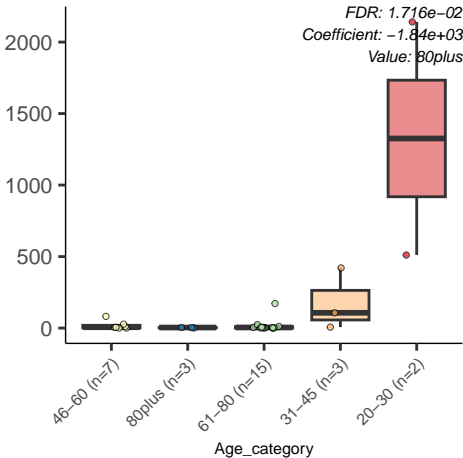



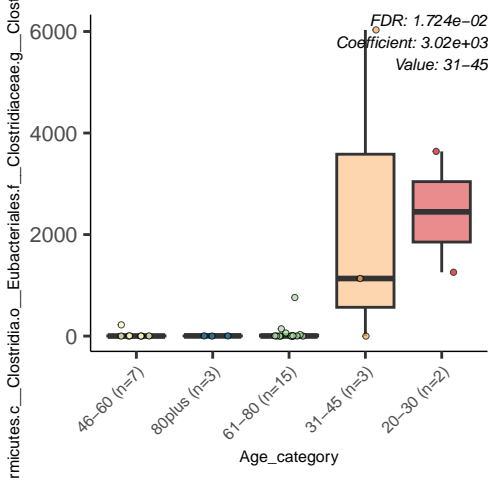

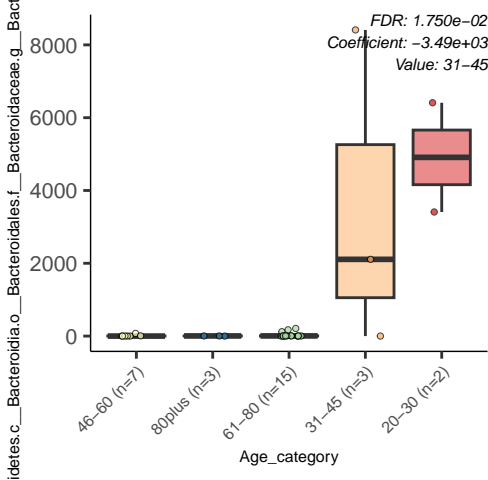

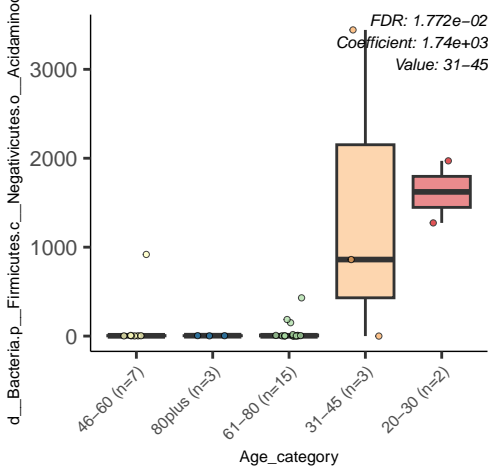

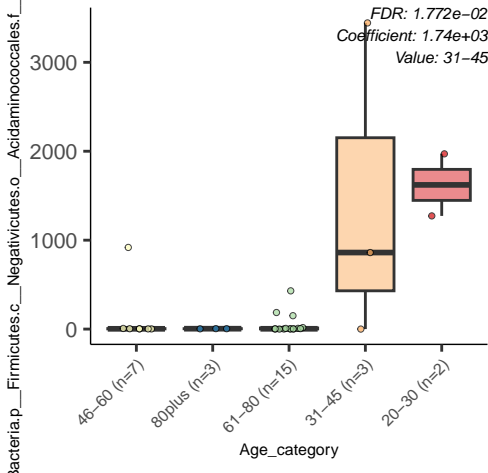

bacteria.p\_\_Firmicutes.c\_\_Clostridia.o\_\_Eubacteriales.f\_\_Lachnospir

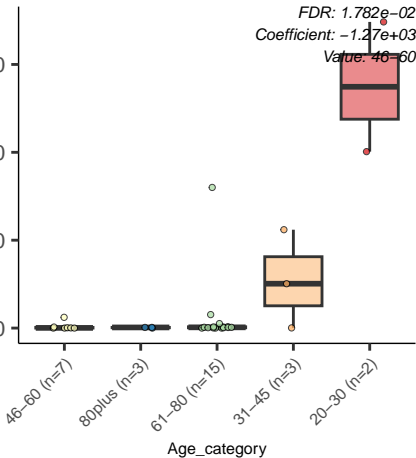

micutes.c\_\_Clostridia.o\_\_Eubacteriales.f\_\_Lachnospiraceae.g\_\_Se

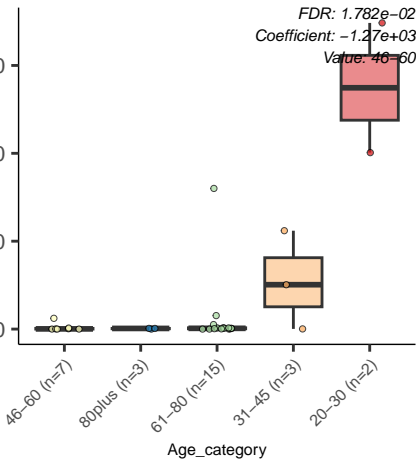

Firmicutes.c\_\_Clostridia.o\_\_Eubacteriales.f\_\_Eubacteriales.Family.

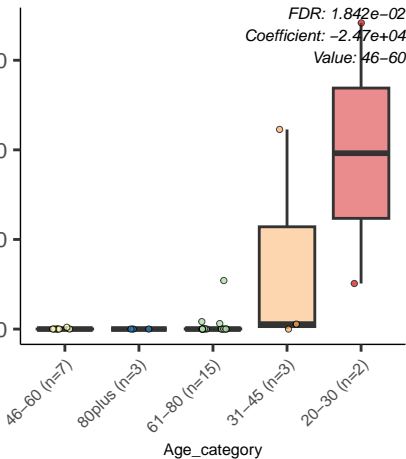

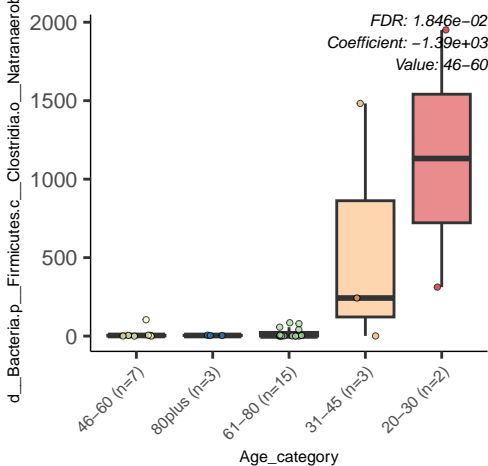



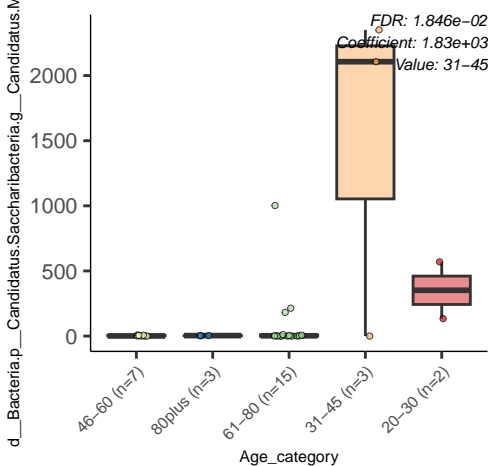

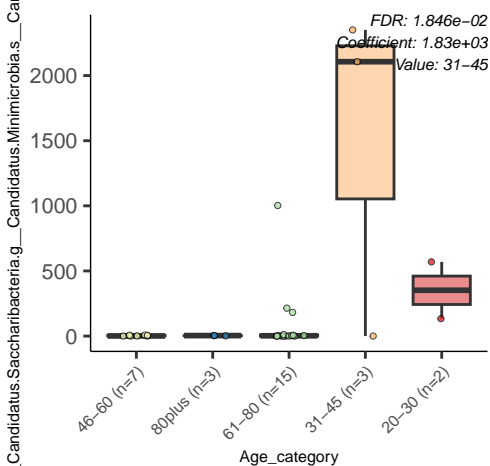

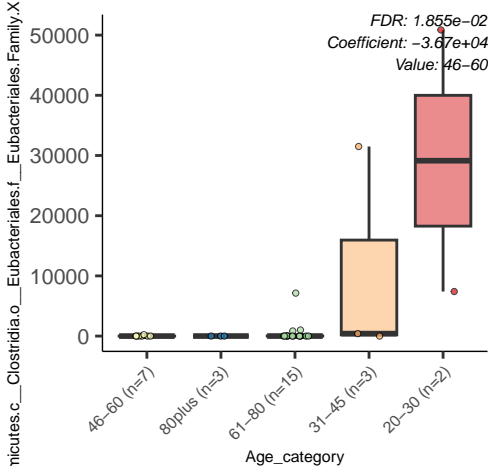

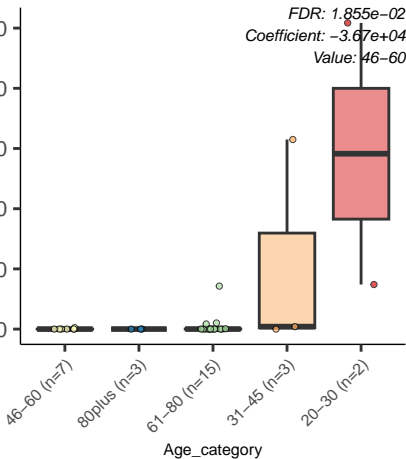

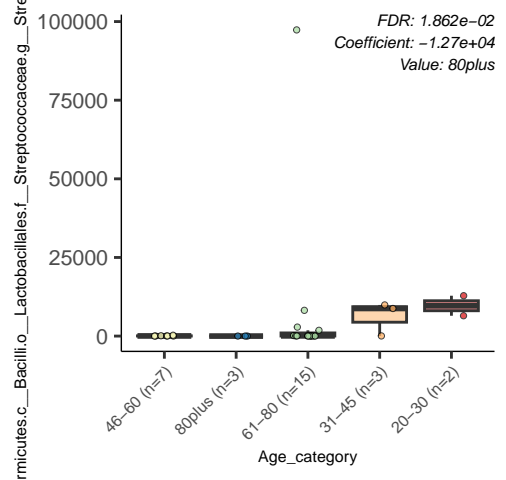

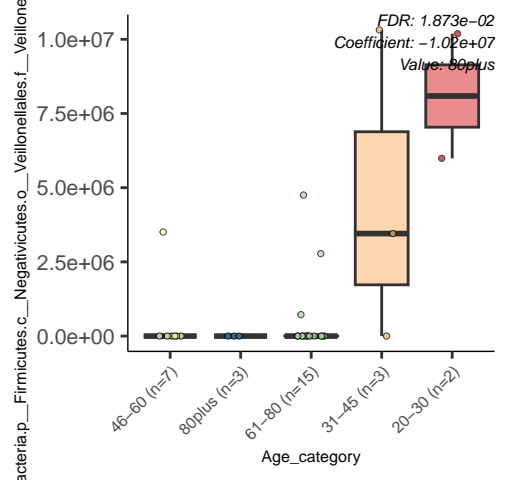

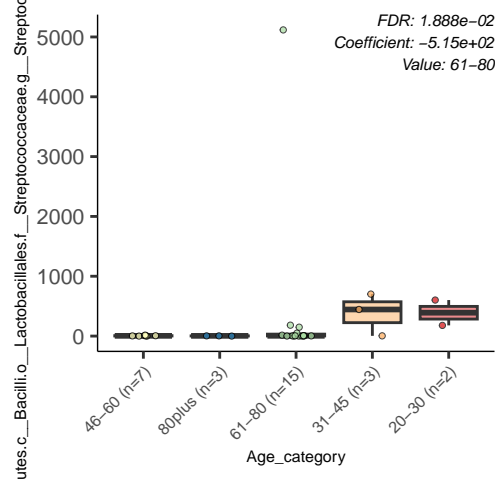

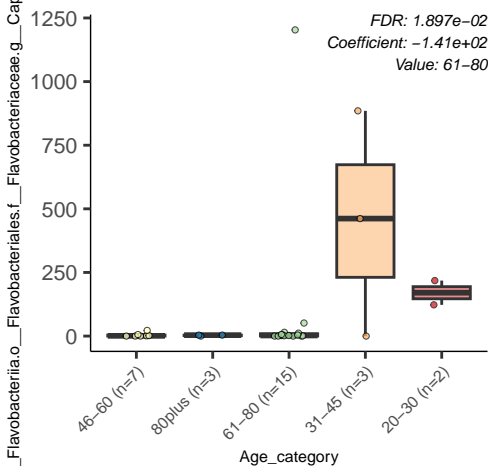



c\_\_Clostridia.o\_\_Eubacteriales.f\_\_Eubacteriales.Family.XIII..Incerta

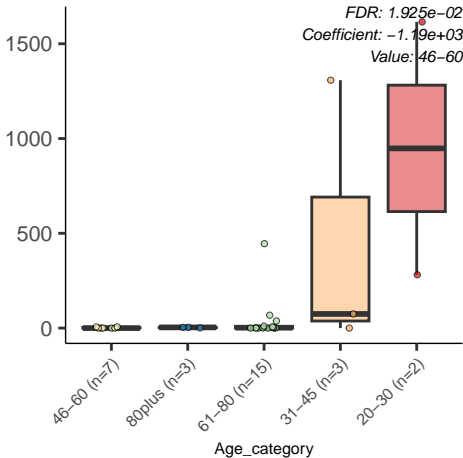

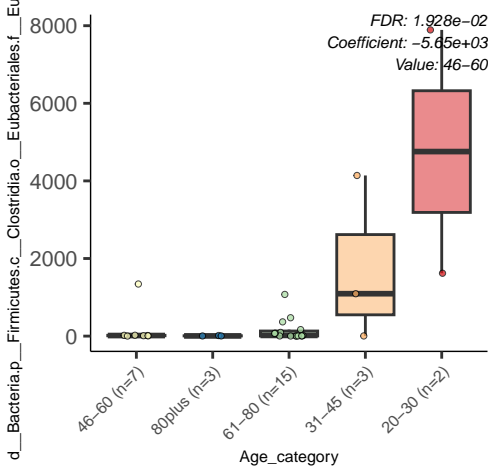

bacteria.c\_\_Fusobacteriia.o\_\_Fusobacteriales.f\_\_Leptotrichiaceae.g

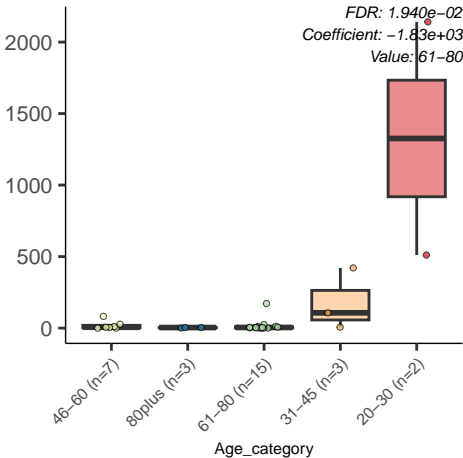

a.p\_\_Bacteroidetes.c\_\_Flavobacteriia.o\_\_Flavobacteriales.f\_\_Flavob

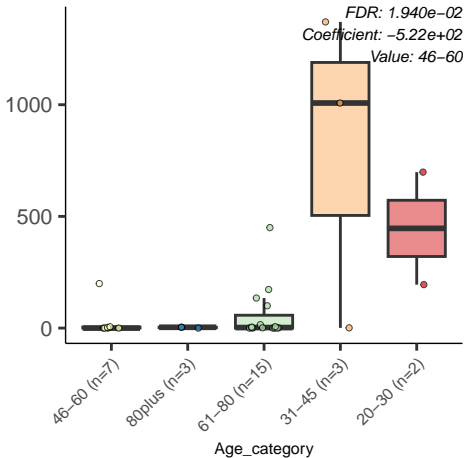

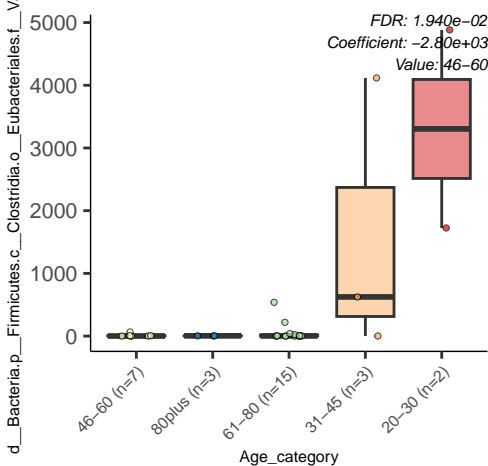

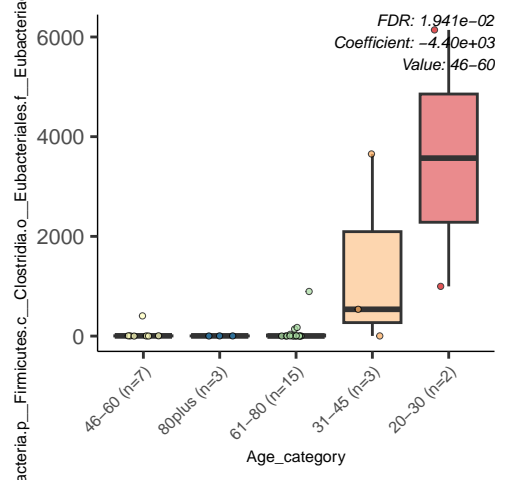

bacteria.c\_\_Betaproteobacteria.o\_\_Neisseriales.f\_\_Neisseriaceae.g

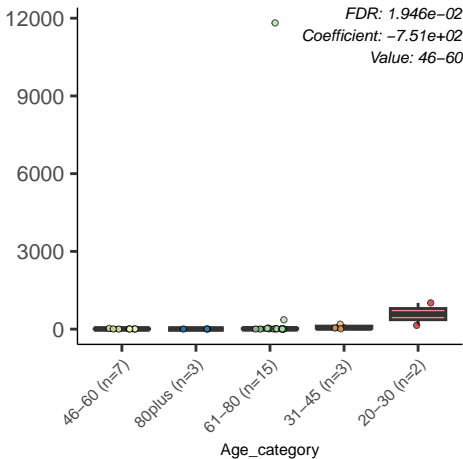

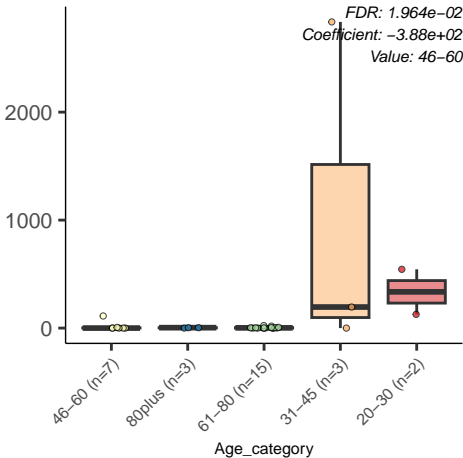



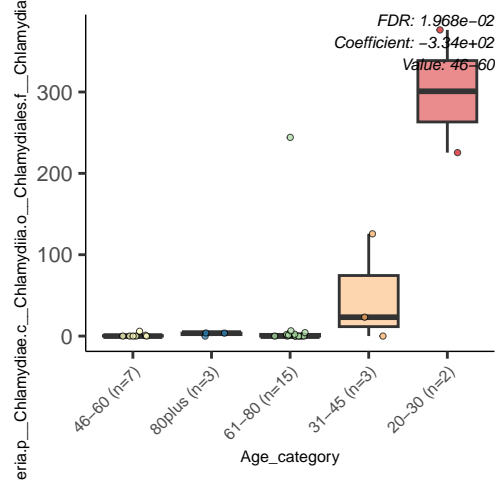

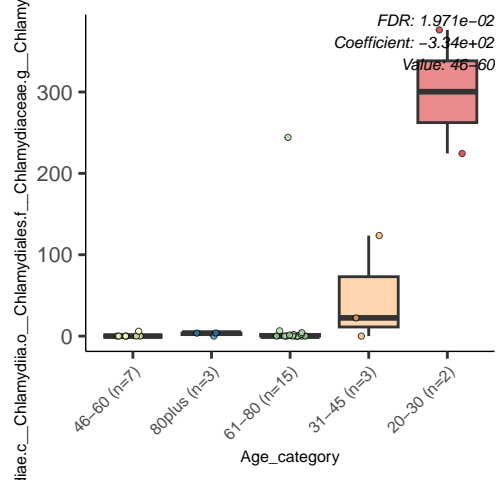

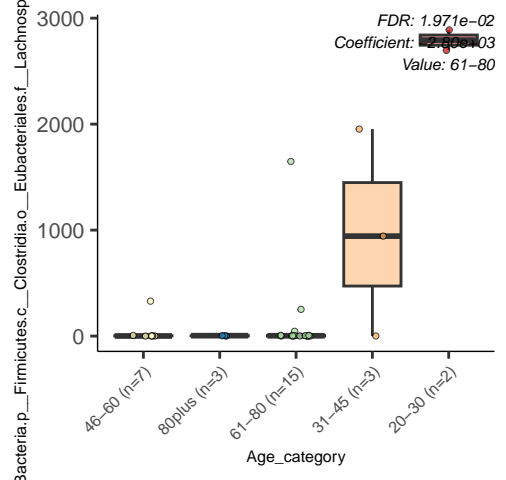

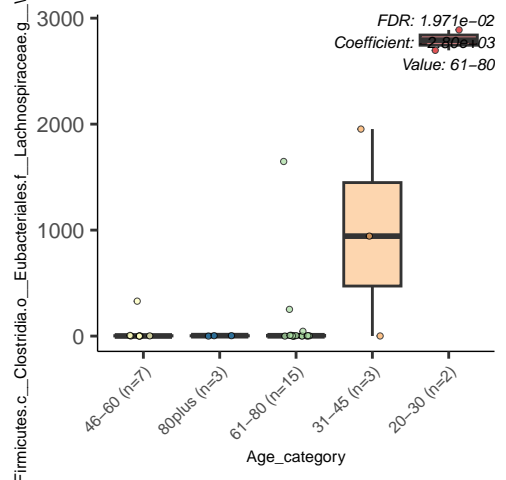

irmicutes.c\_\_Clostridia.o\_\_Eubacteriales.f\_\_Lachnospiraceae.g\_\_B

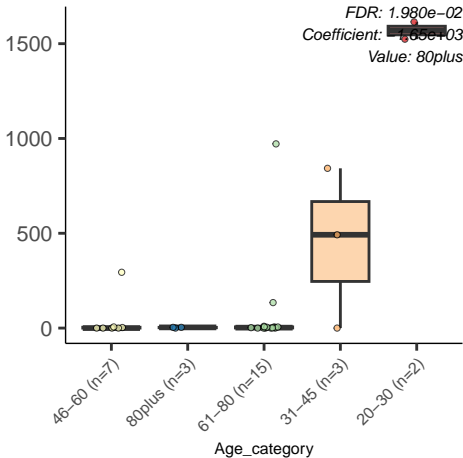

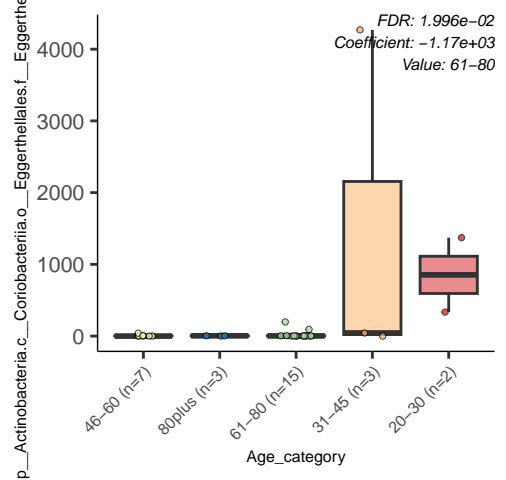

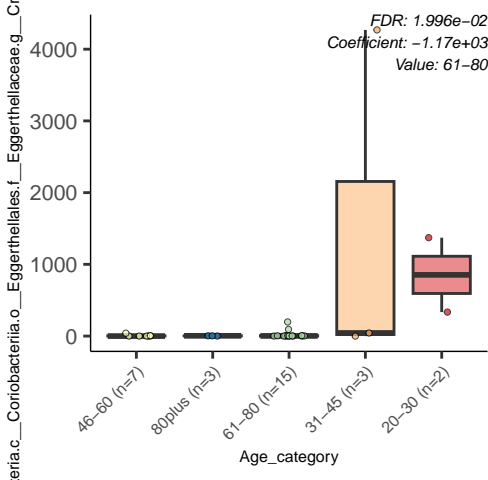

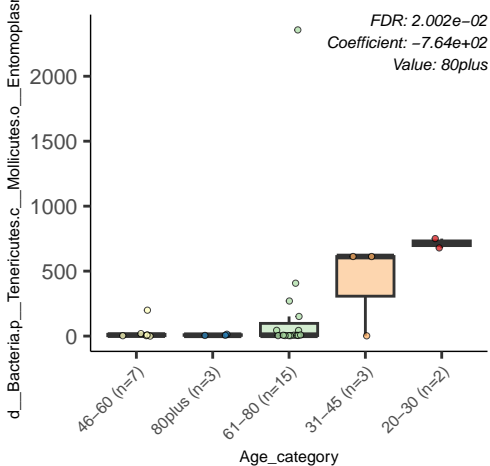



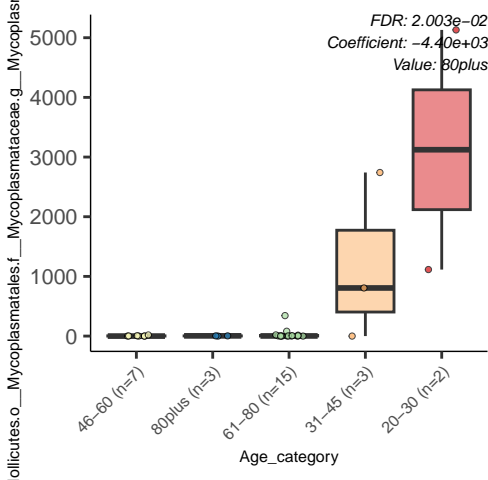

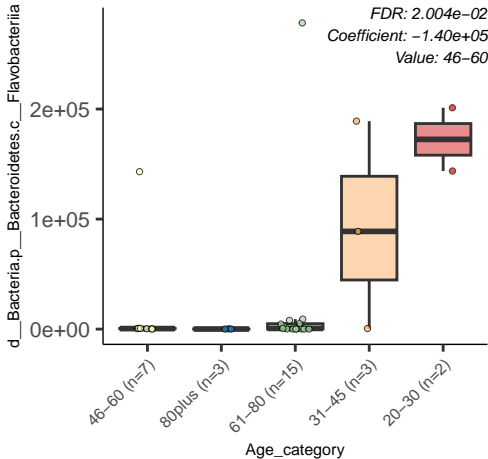

d\_Bacteria.p\_\_Bacteroidetes.c\_\_Flavobacteriia.o\_\_Flavoba

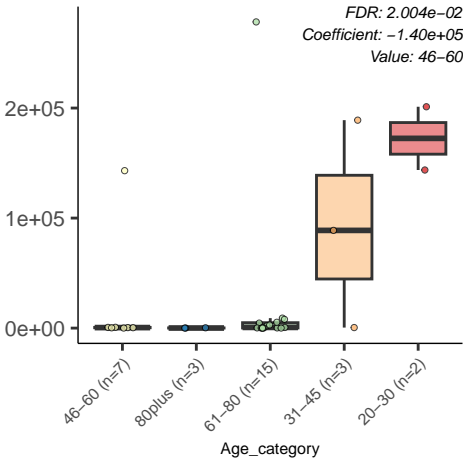

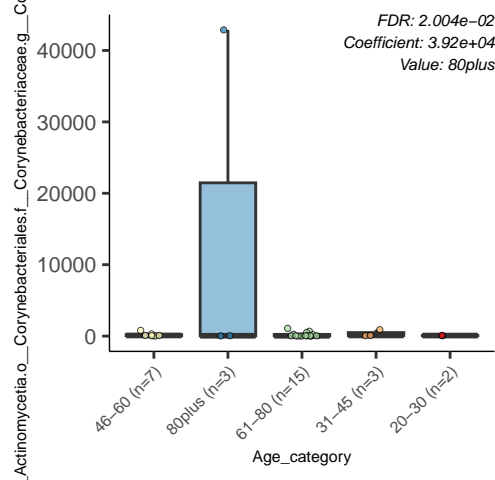

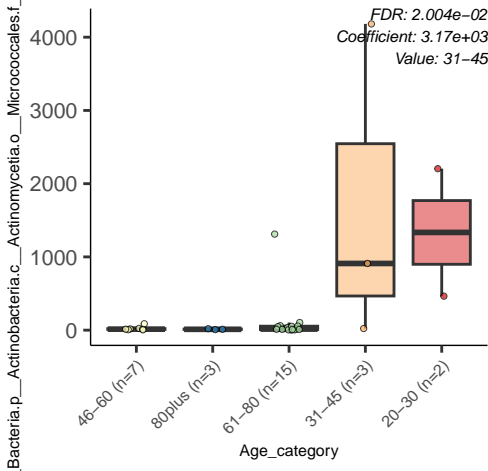

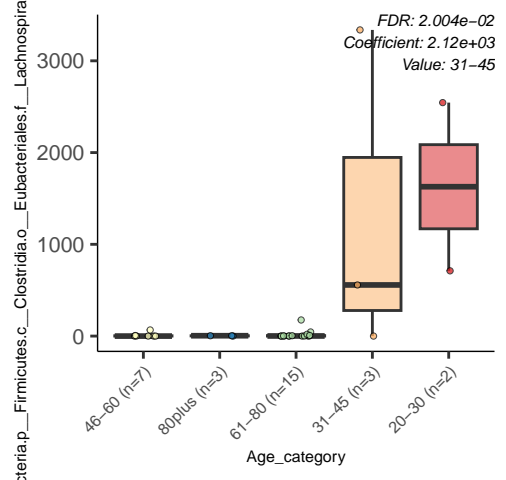

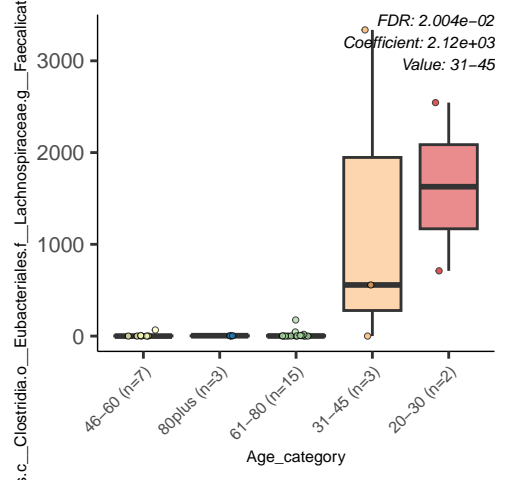

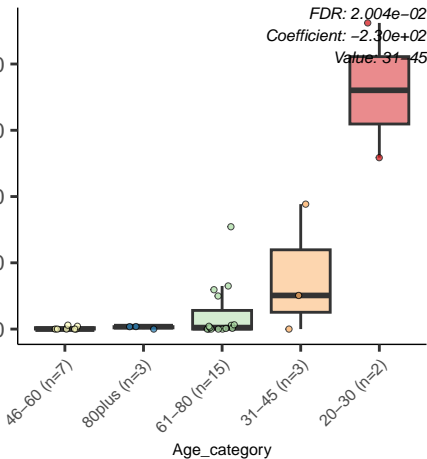



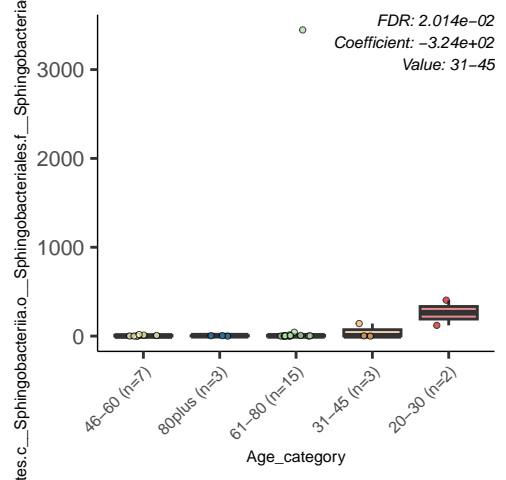

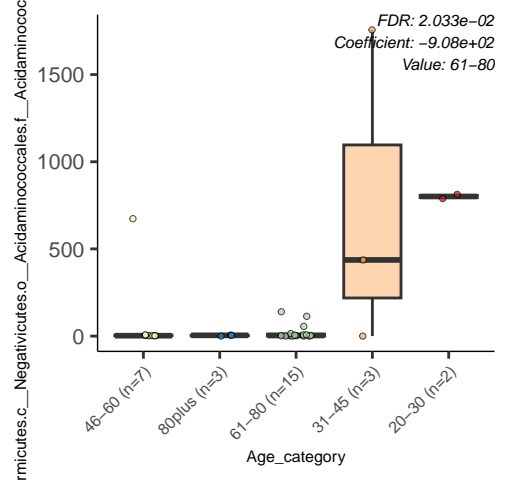

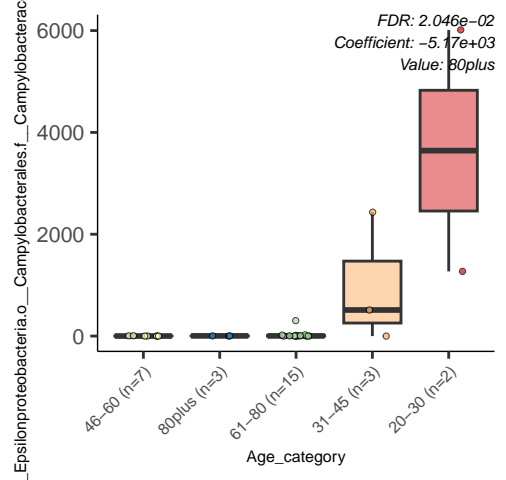

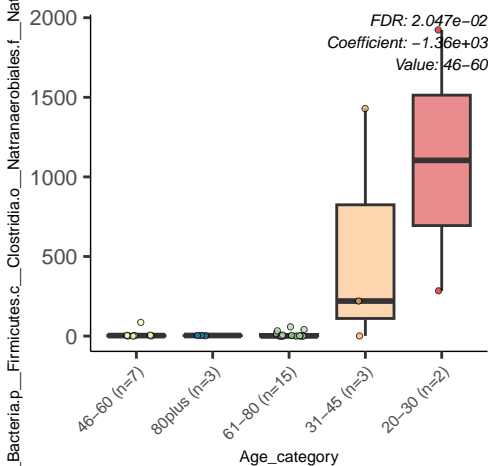

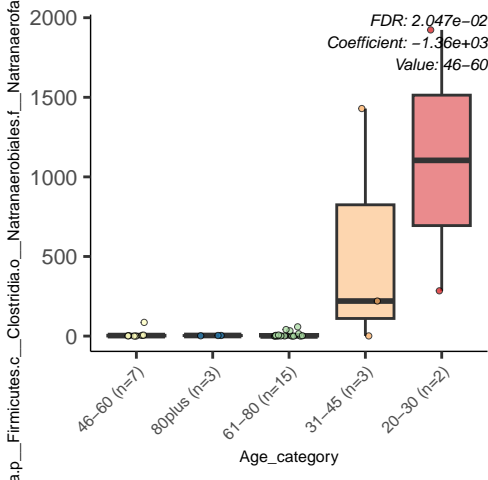

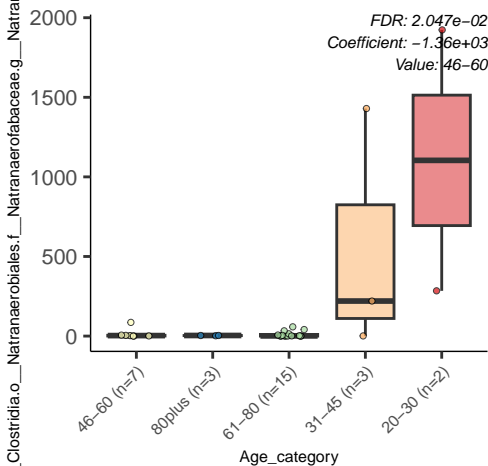

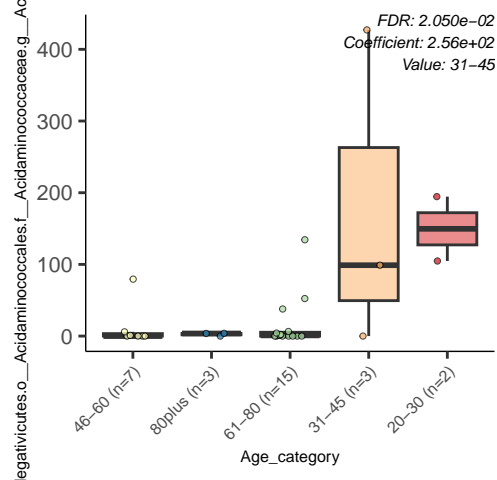

d\_\_Bacteria.p\_\_Tenericutes.c\_\_Mollicutes.o\_\_Acholeplas

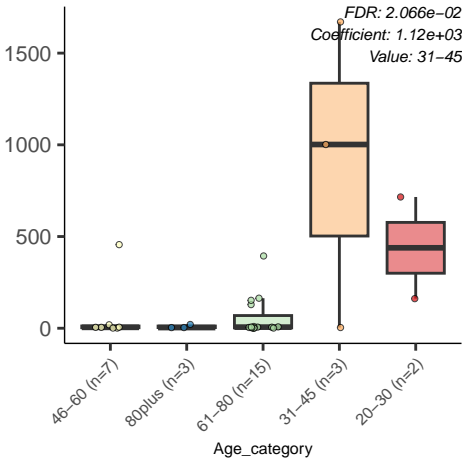



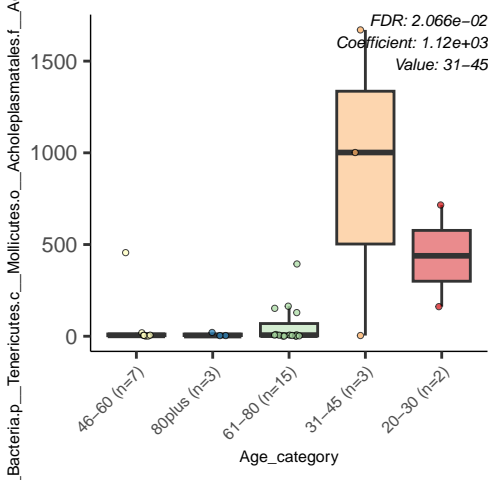

eria.p\_\_Bacteroidetes.c\_\_Bacteroidia.o\_\_Bacteroidales.f\_\_Barnesi

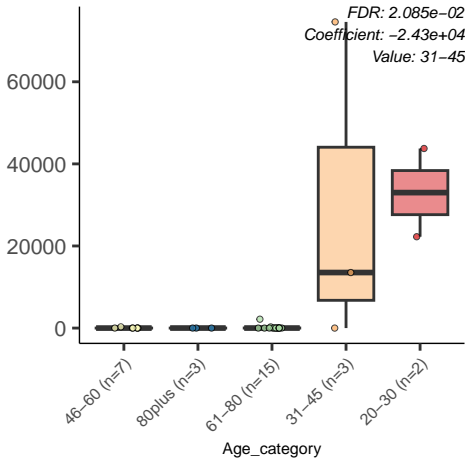

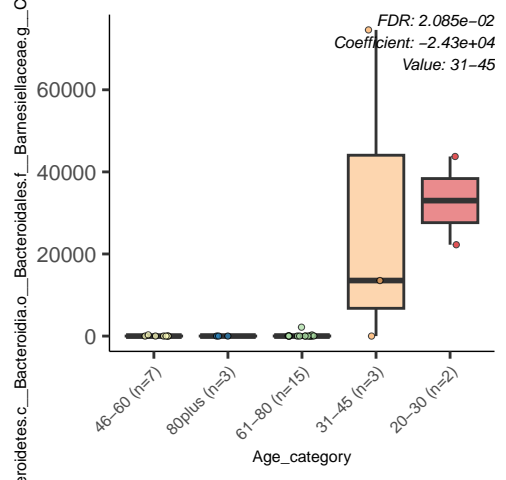

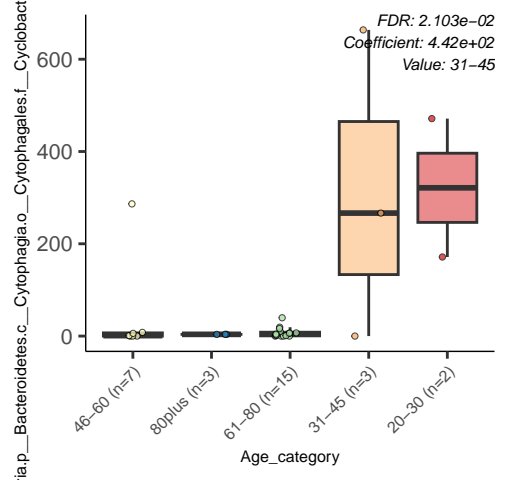

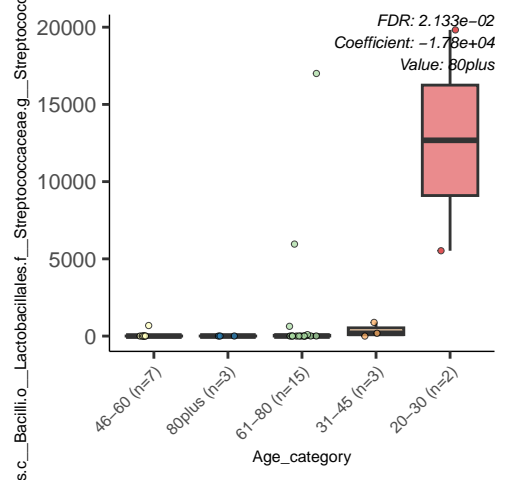

o\_\_Proteobacteria.c\_\_Gammaproteobacteria.o\_\_Thiotrichales.f\_\_Fr

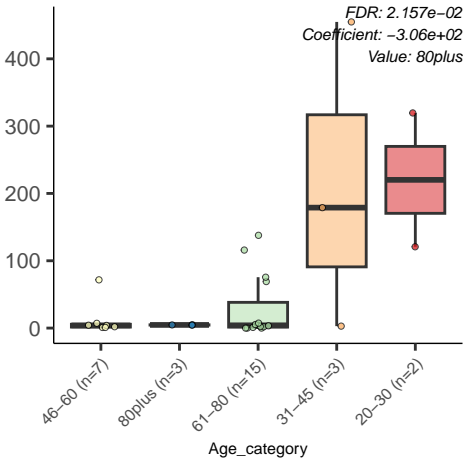

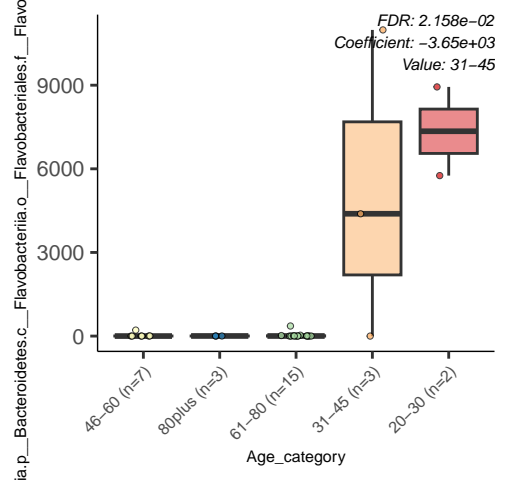

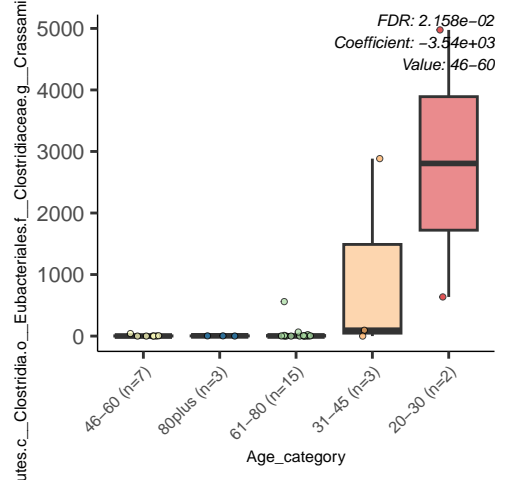



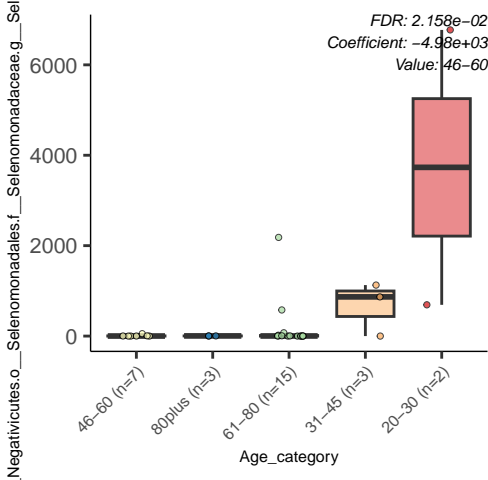

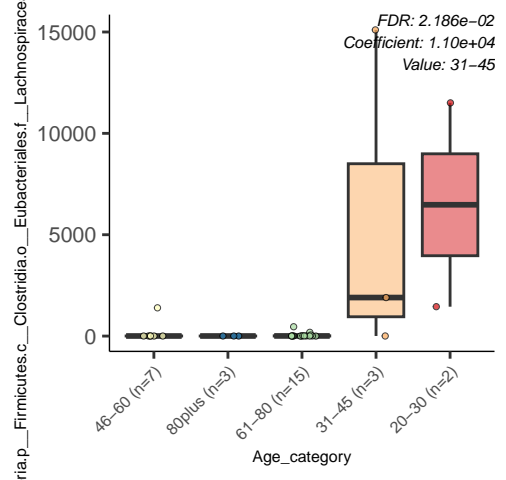

d\_Bacteria.p\_\_Cyanobacteria

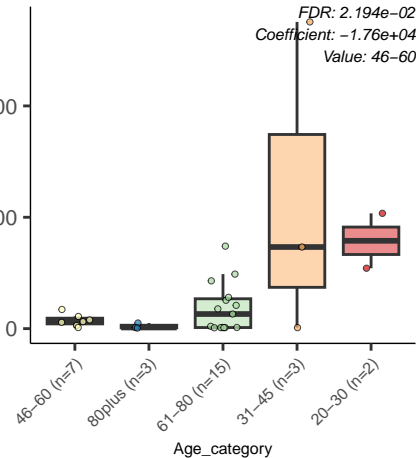

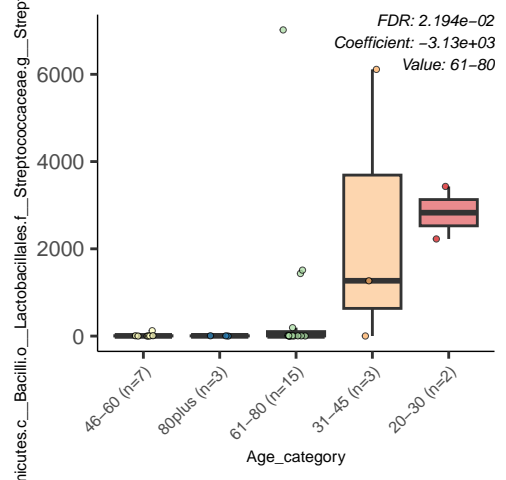

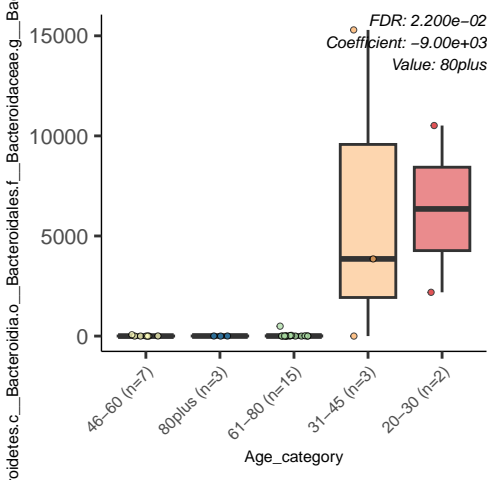

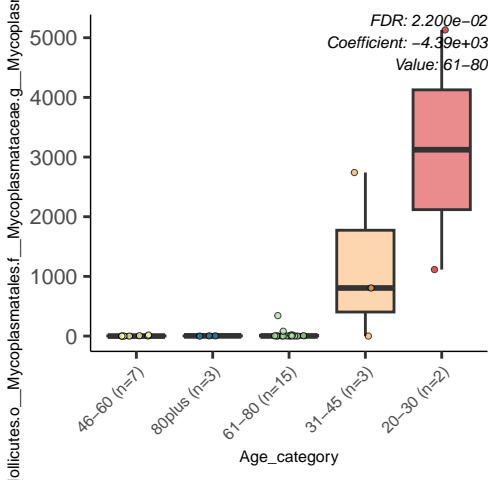

Firmicutes.c\_\_Bacilli.o\_\_Bacillales.f\_\_Bacillaceae.g\_\_Geobacillus

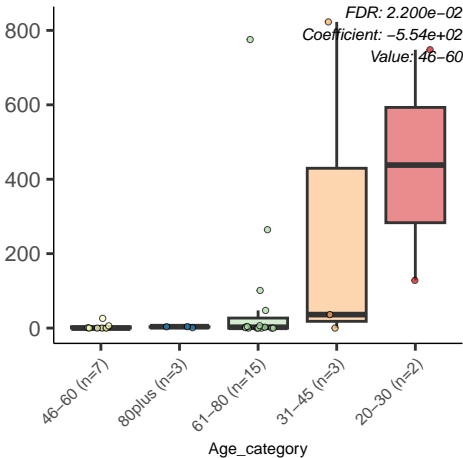

eria.p\_\_Firmicutes.c\_\_Bacilli.o\_\_Bacillales.f\_\_Thermoactinomyceta

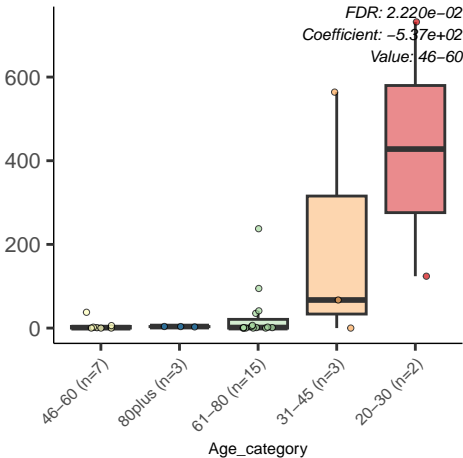



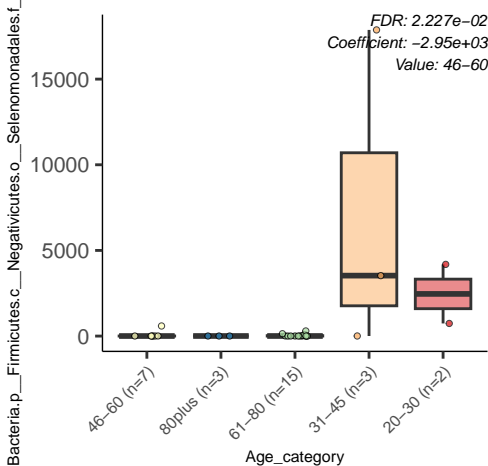

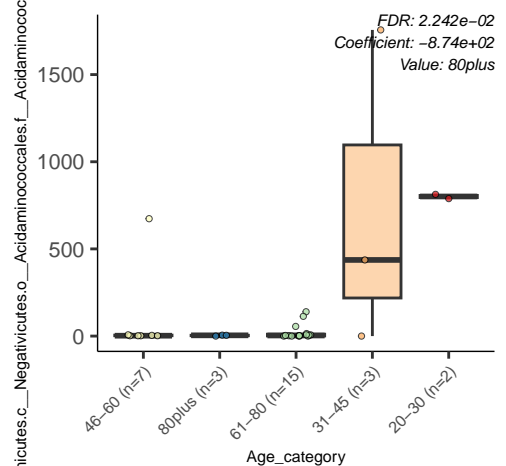

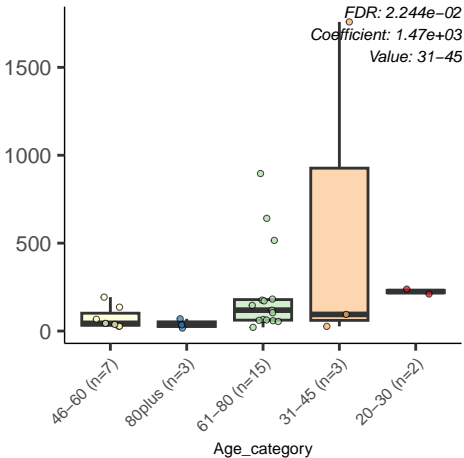

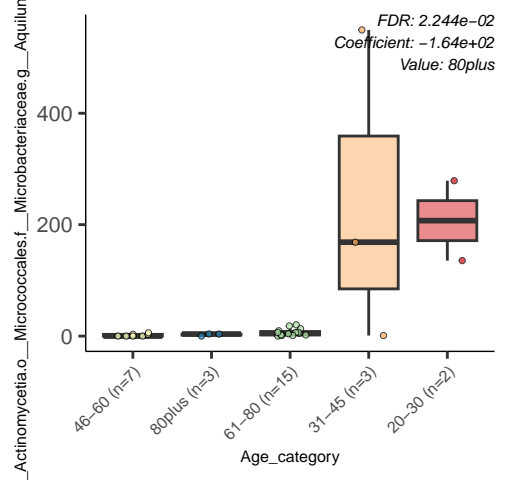

bacteria.p\_\_Firmicutes.c\_\_Clostridia.o\_\_Eubacteriales.f\_\_Oscillospira

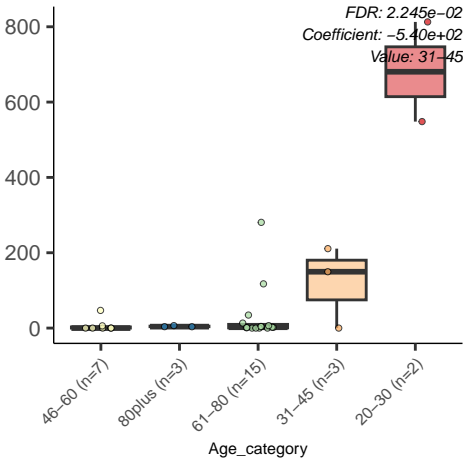

eria.p\_\_Bacteroidetes.c\_\_Bacteroidia.o\_\_Bacteroidales.f\_\_Muribac

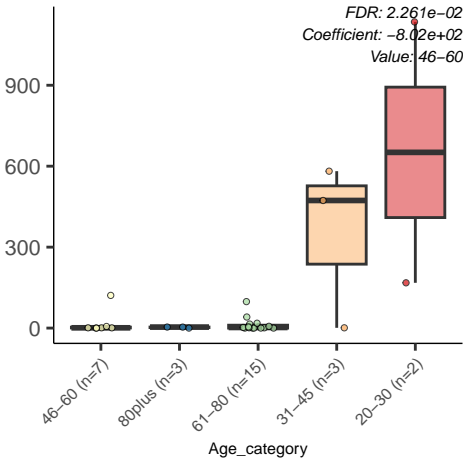

oidetes.c\_\_Bacteroidia.o\_\_Bacteroidales.f\_\_Muribaculaceae.g\_\_So

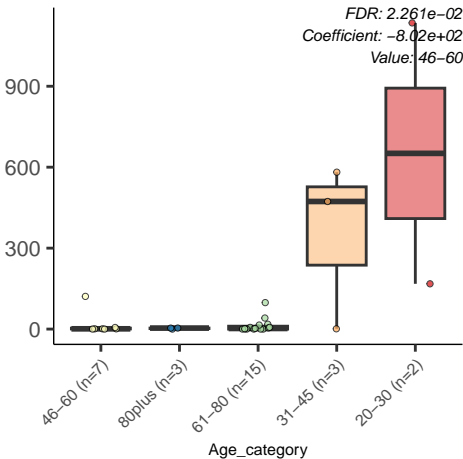

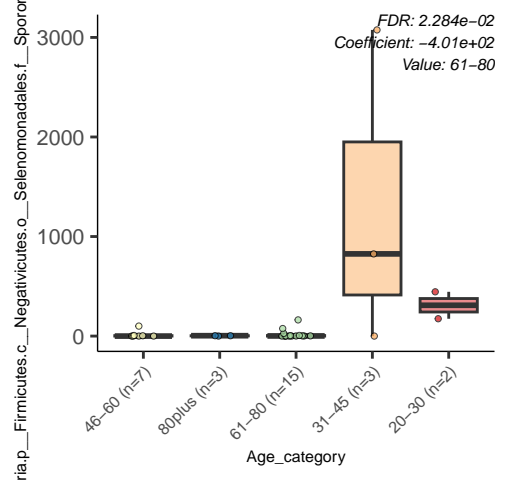



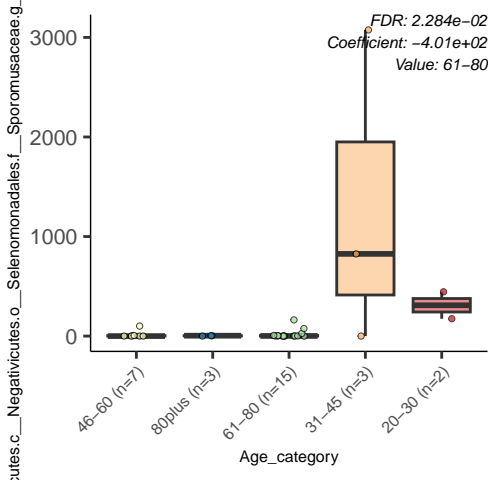

d\_\_Bacteria.p\_\_Chlorobi

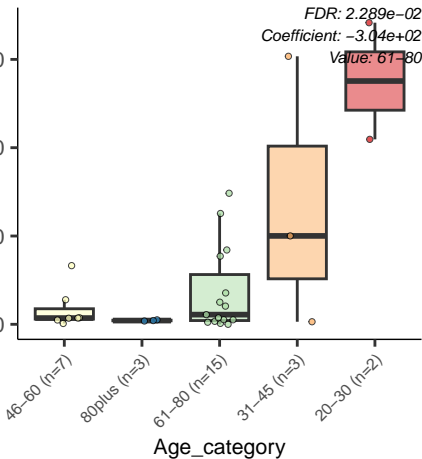

d\_Bacteria.p\_\_Chlorobi.c\_\_Chlorobia

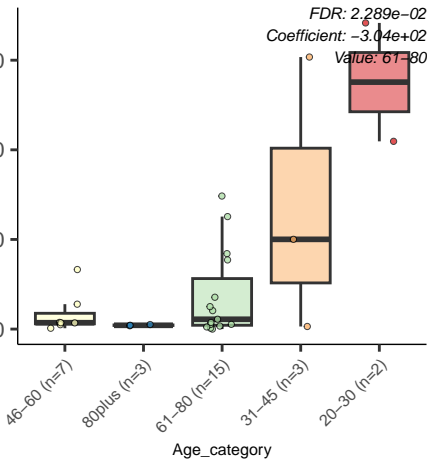

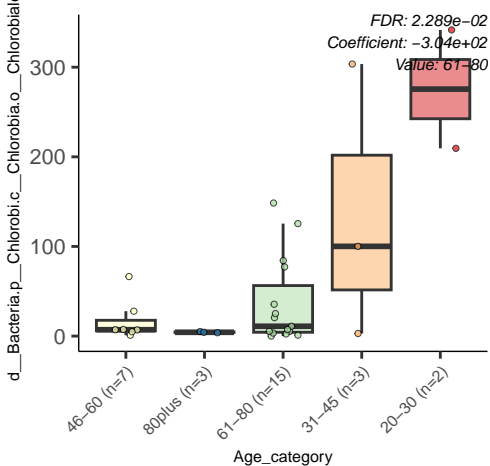

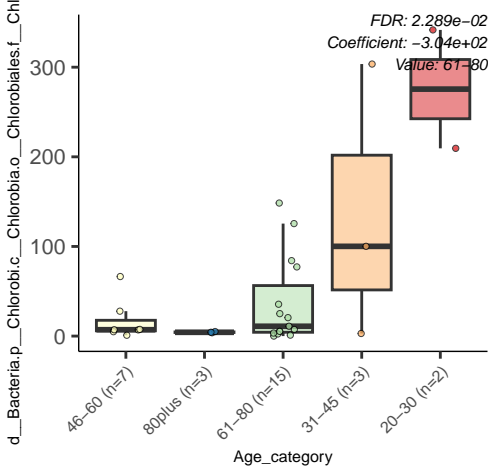

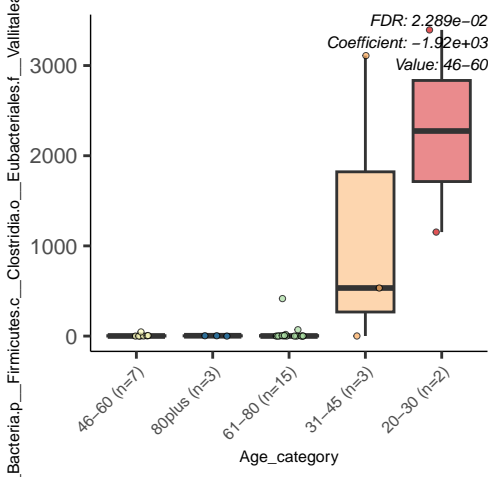

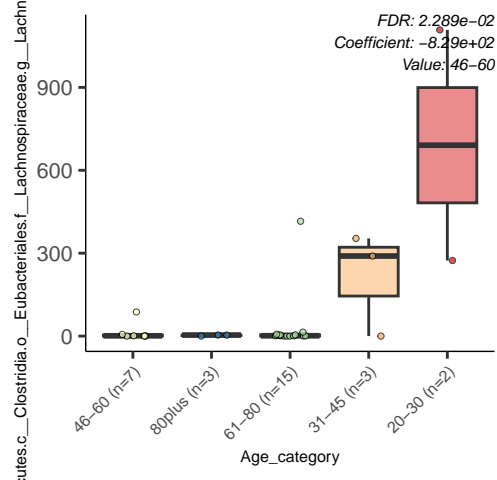

ia.p\_\_Tenericutes.c\_\_Mollicutes.o\_\_Mycoplasmatales.f\_\_Mycoplasm

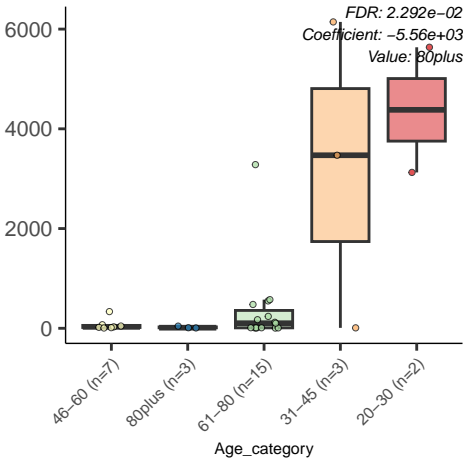



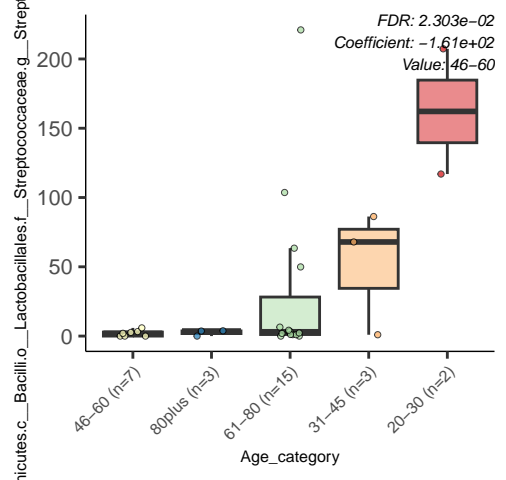

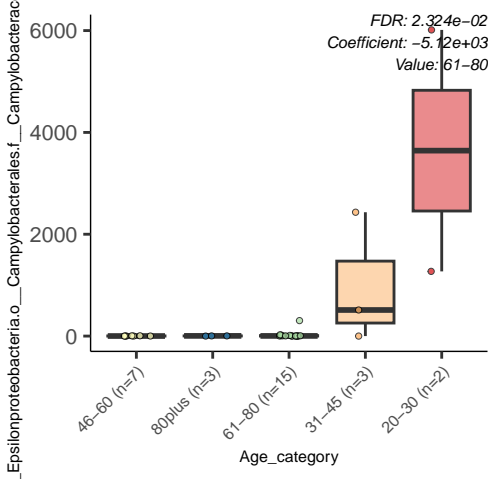

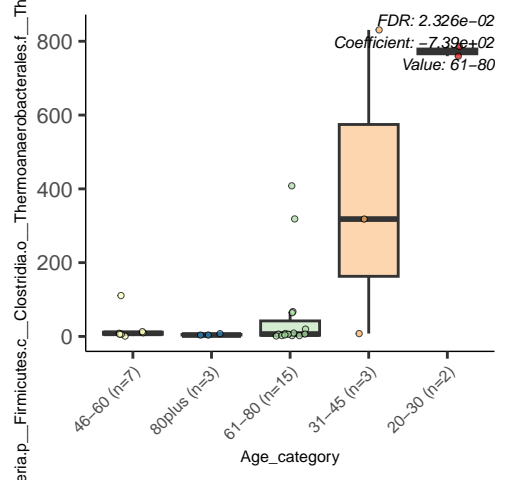

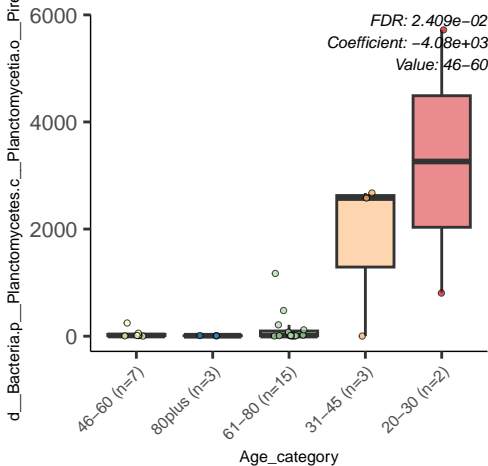

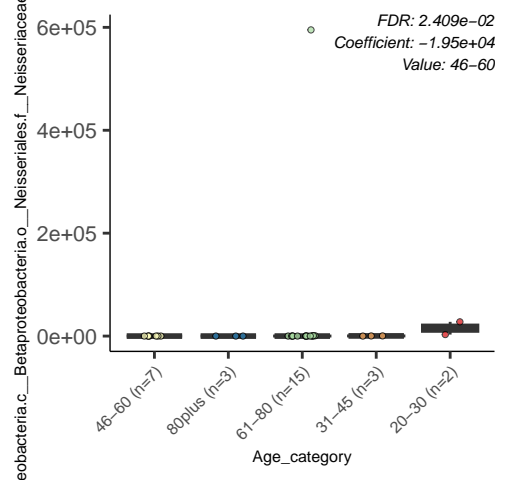

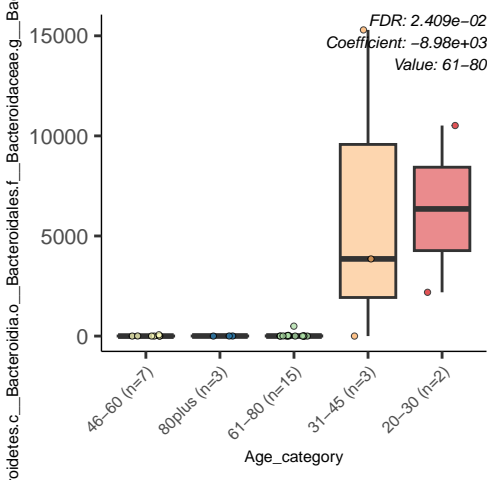

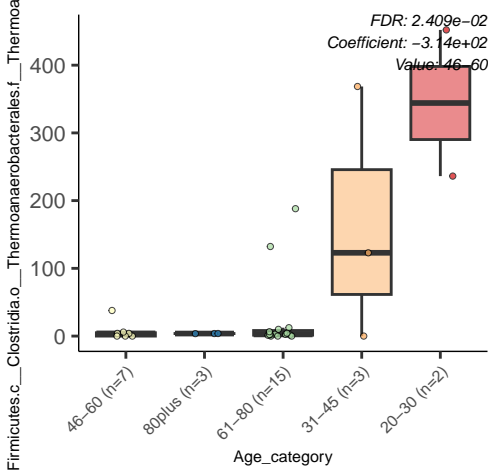

a.p\_Firmicutes.c\_Clostridia.o\_Eubacteriales.f\_Desulfitobacteria

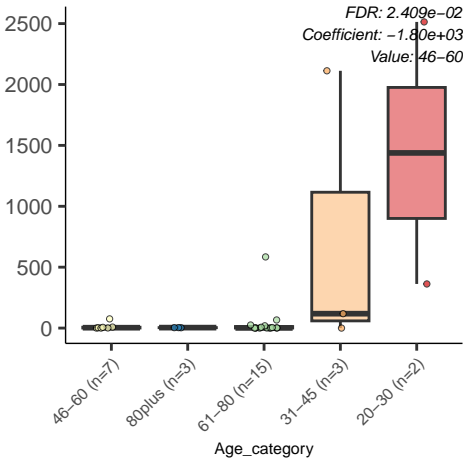



bacteria.p\_\_Proteobacteria.c\_\_Gammaproteobacteria.o\_\_Thiotrichales

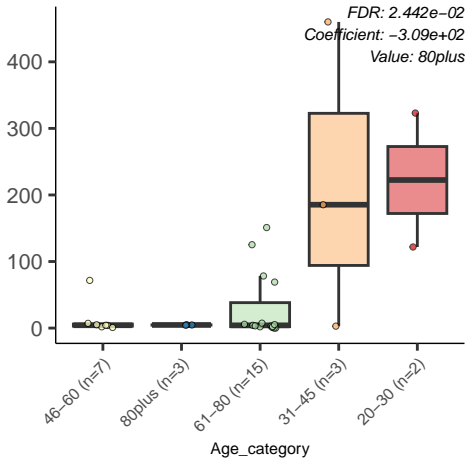

Epsilonproteobacteria.o\_\_Campylobacterales.f\_\_Campylobacter

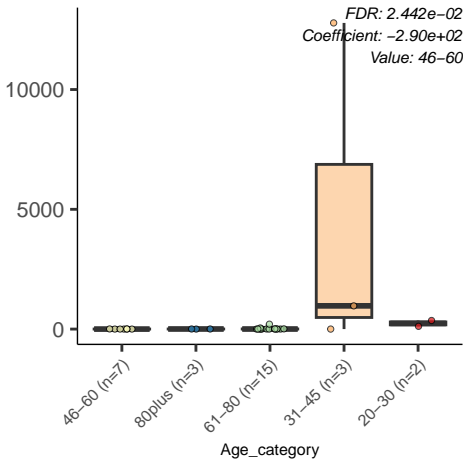

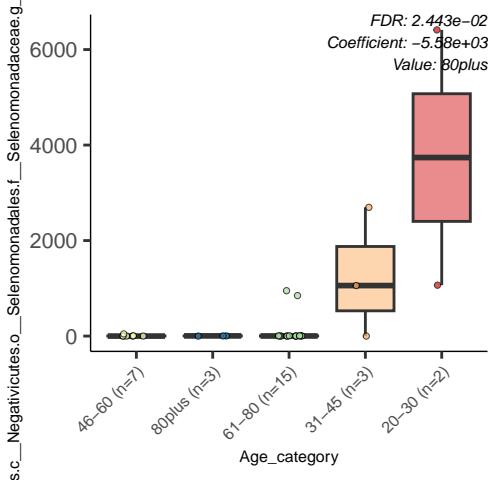

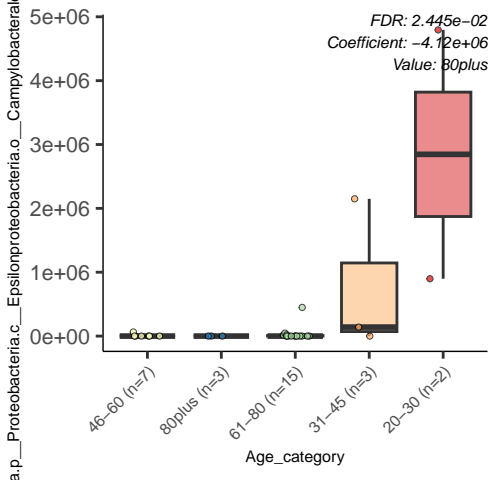

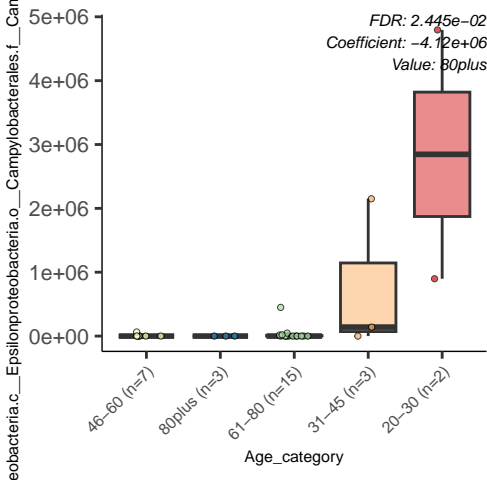

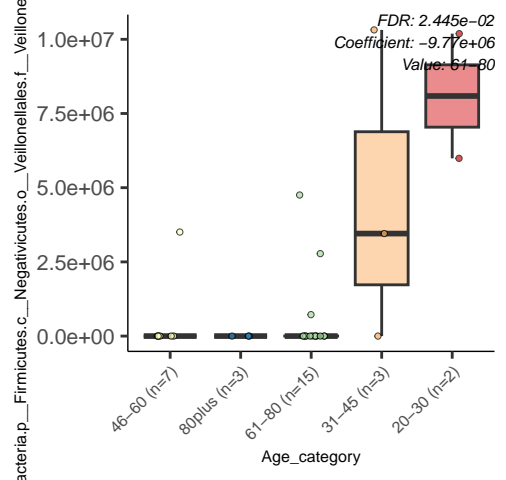

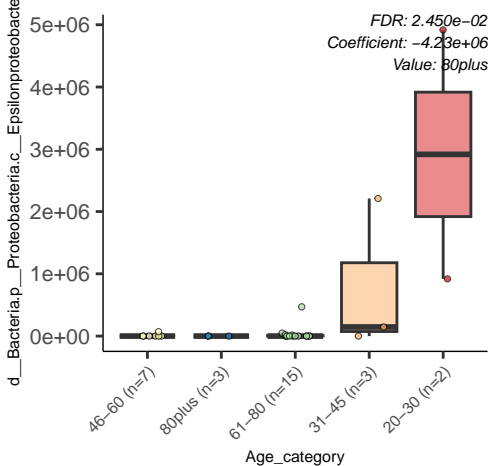

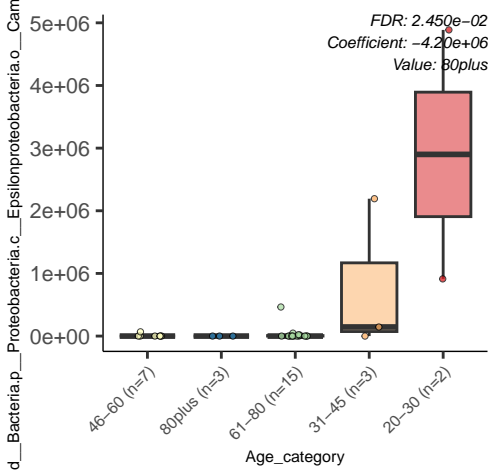



d\_\_Bacteria.p\_Actinobacteria.c\_Actinomycetia.o\_Coryneb

FDR: 2.450e-02  
Coefficient: 2.64e+05  
Value: 80plus

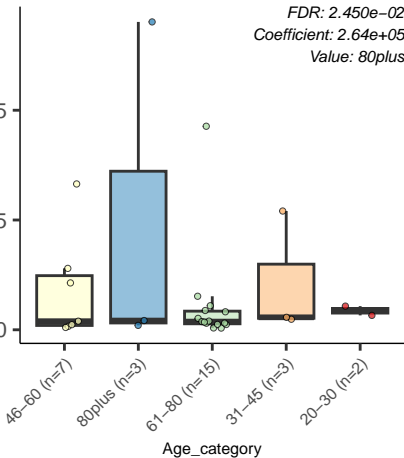

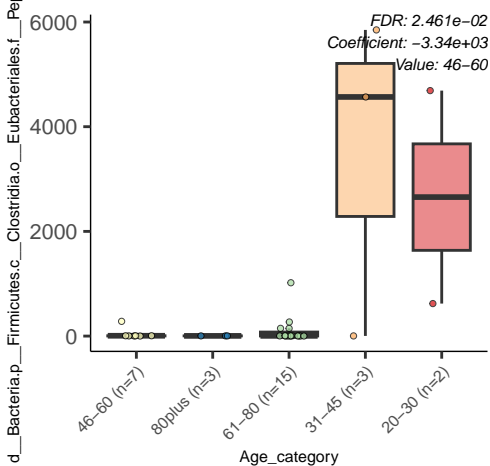

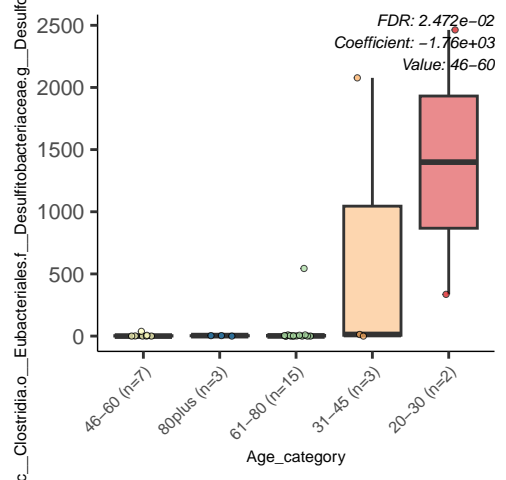

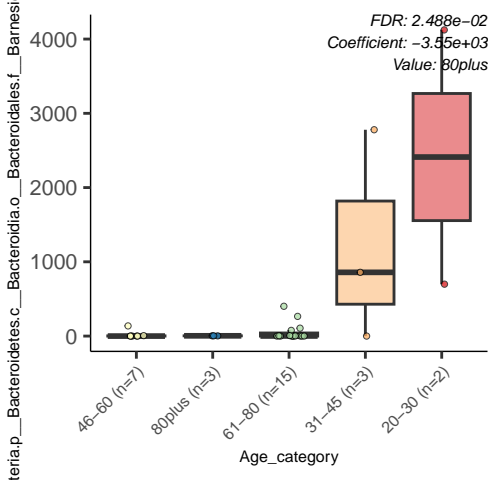

eroidetes.c\_\_Bacteroidia.o\_\_Bacteroidales.f\_\_Barnesiellaceae.g\_\_B

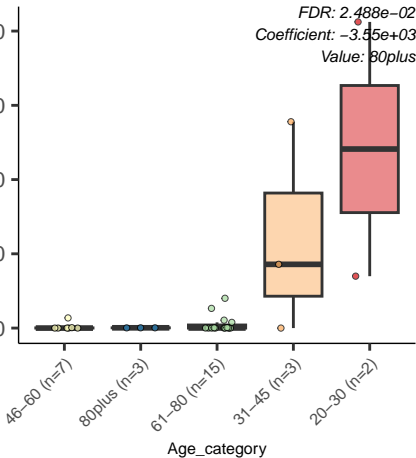

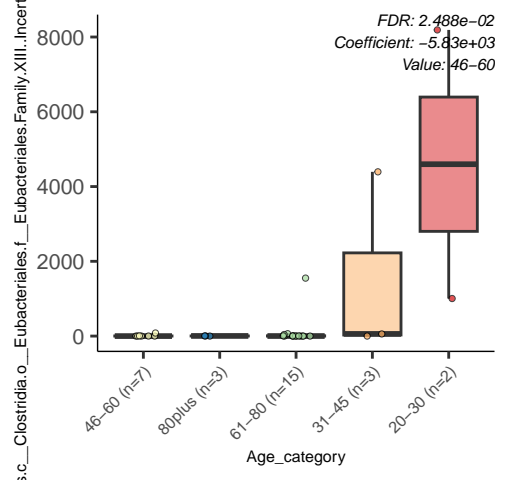

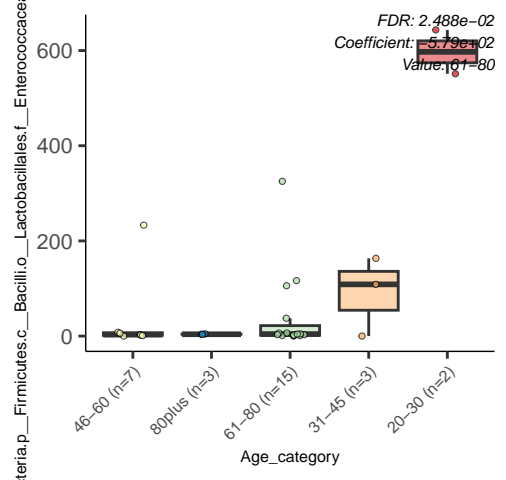

d\_Bacteria.p\_Firmicutes.c\_Bacilli.o\_Bacillales.f\_Thermoacti

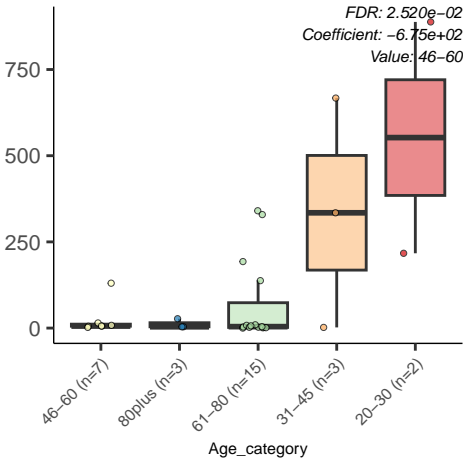



a.p\_\_Bacteroidetes.c\_\_Flavobacteriia.o\_\_Flavobacteriales.f\_\_Flavob

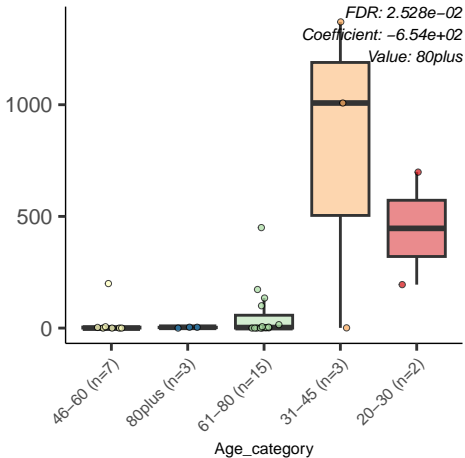

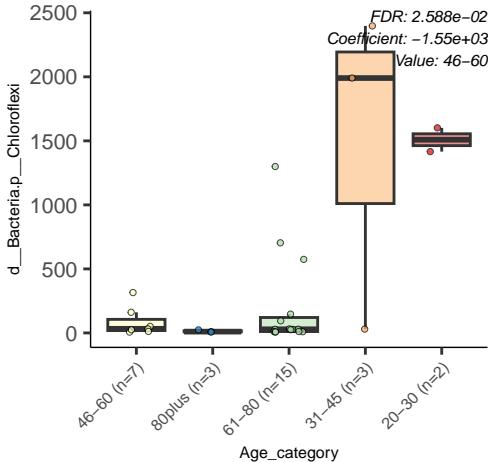

Actinobacteria.c\_\_Actinomycetia.o\_\_Corynebacteriales.f\_\_

FDR: 2.588e-02  
Coefficient: 2.66e+05  
Value: 80plus

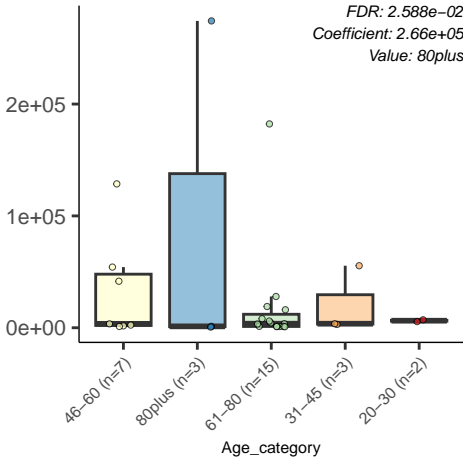

Actinobacteria.c\_\_Actinomycetia.o\_\_Corynebacteriales.f\_\_Coryneb

FDR: 2.588e-02  
Coefficient: 2.66e+05  
Value: 80plus

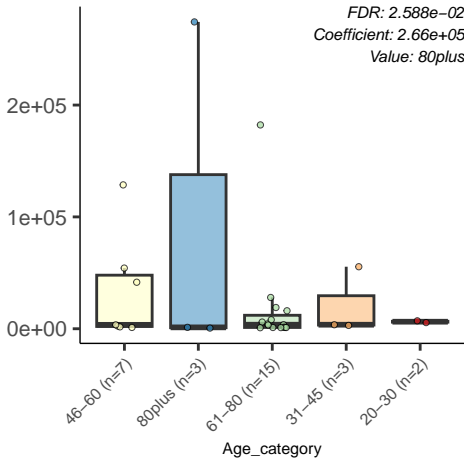

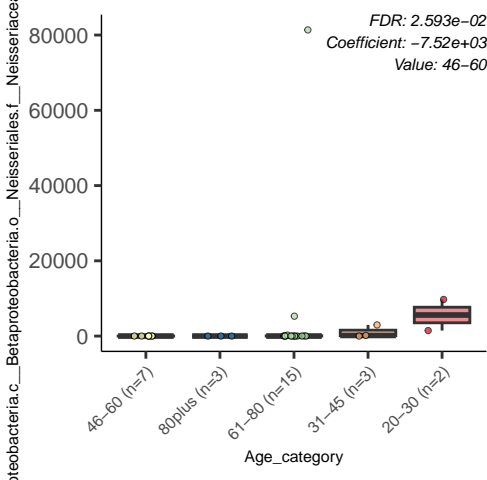

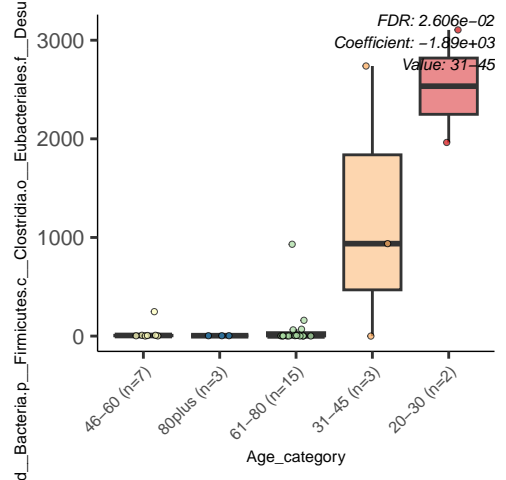

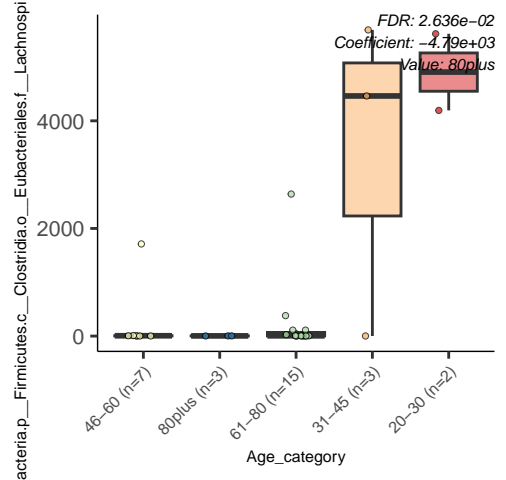

bacteria.p\_\_Firmicutes.c\_\_Clostridia.o\_\_Eubacteriales.f\_\_Lachnospir

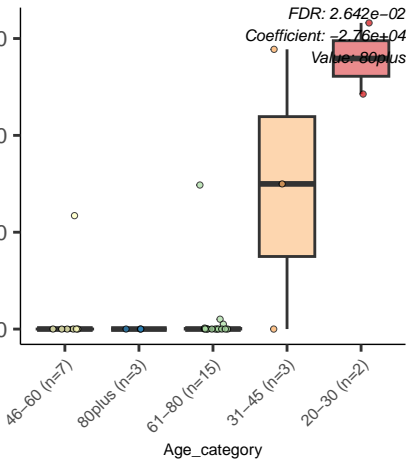



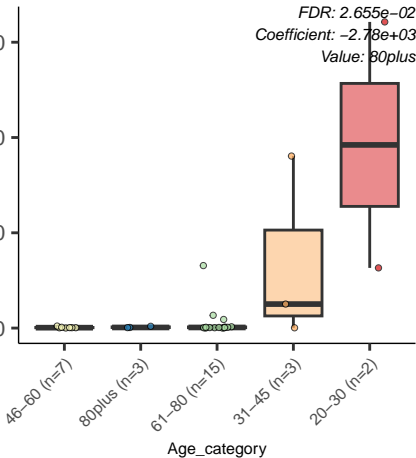

\_\_\_Epsilonproteobacteria.o\_\_Campylobacteriales.f\_\_Campylobacter

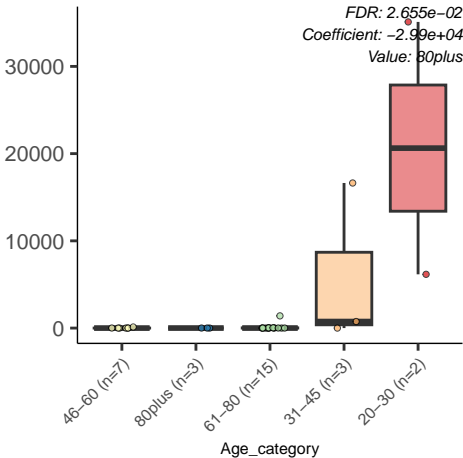

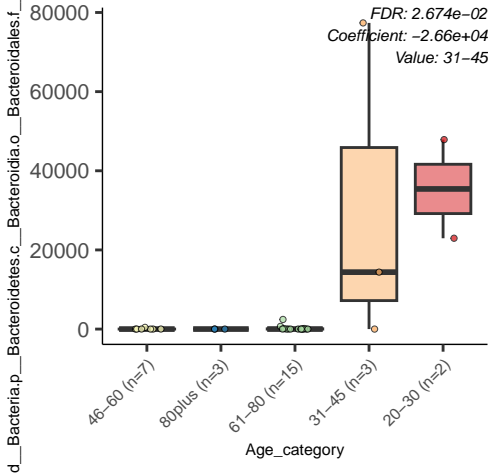

d\_Bacteria.p\_Planctomycetes

FDR:  $2.679 \times 10^{-2}$   
Coefficient:  $-8.28 \times 10^3$   
Value: 46-60

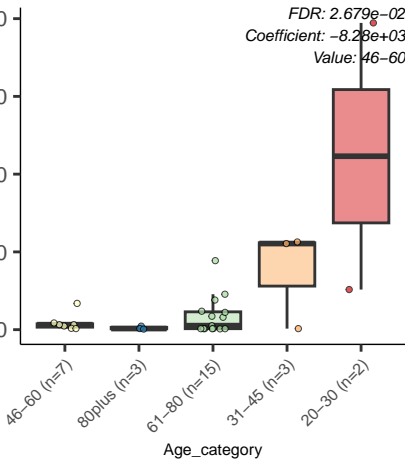

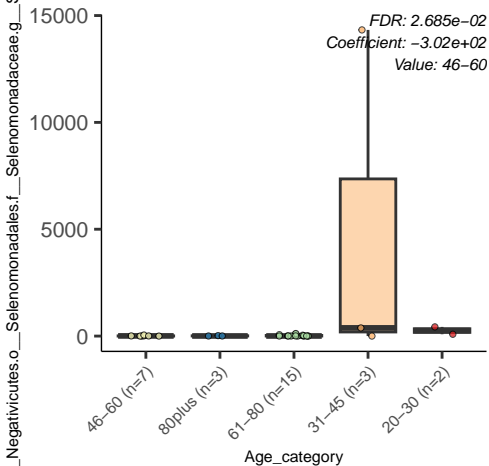

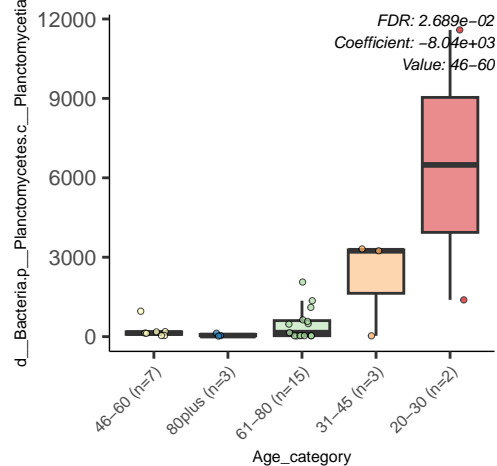

psilonproteobacteria.o\_\_Campylobacterales.f\_\_Campylobacteraceae

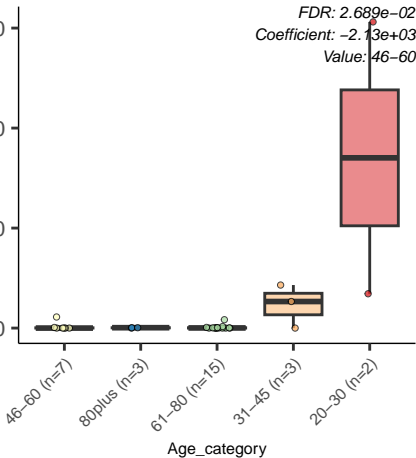

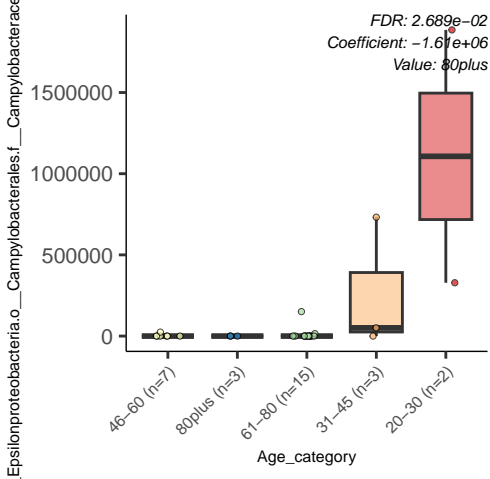



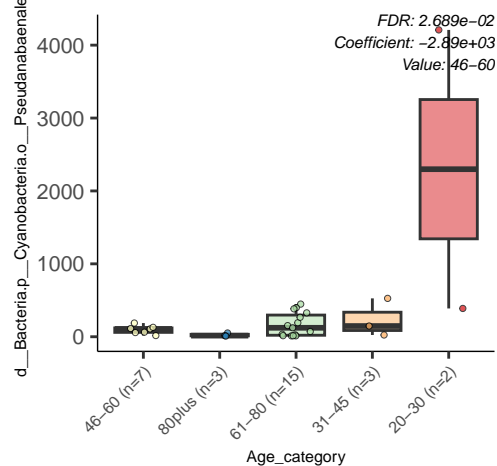

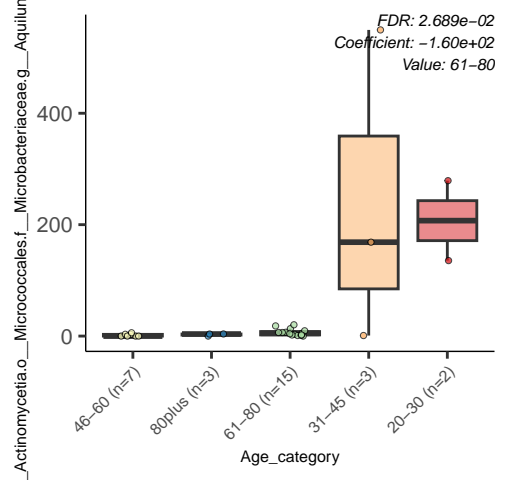

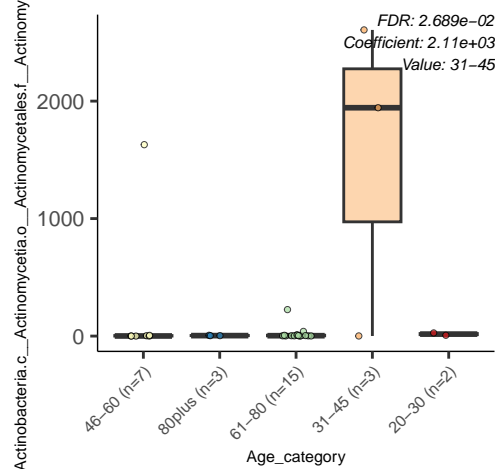

c\_Actinomycetia.o\_Actinomycetales.f\_Actinomycetaceae.g\_Ch

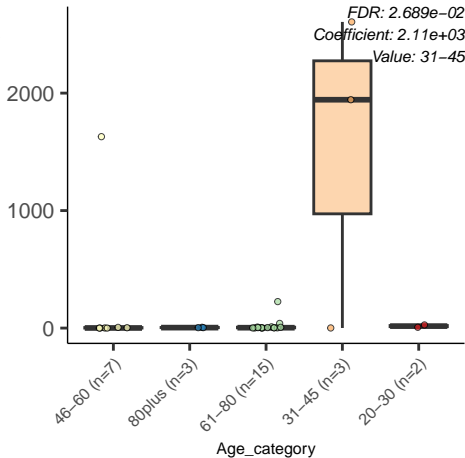

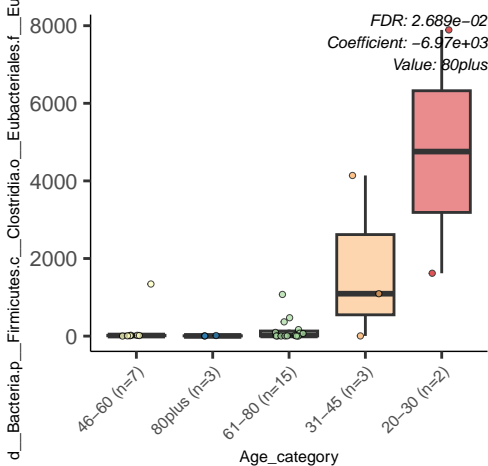

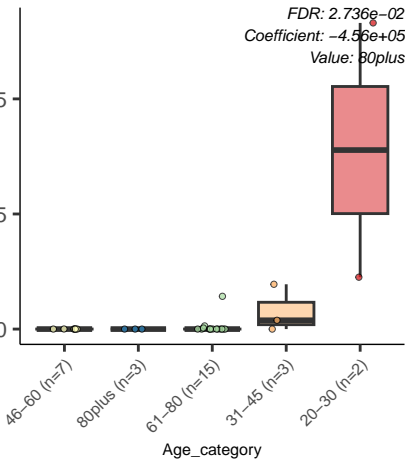

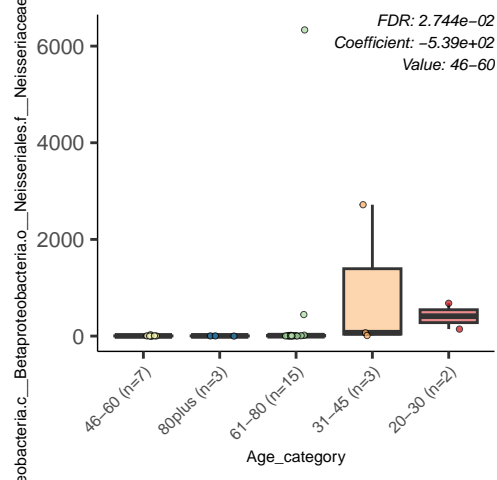

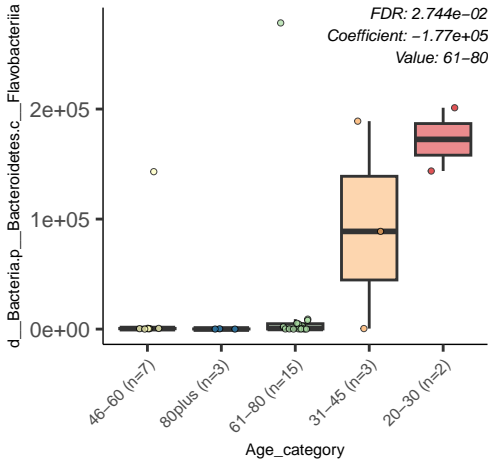



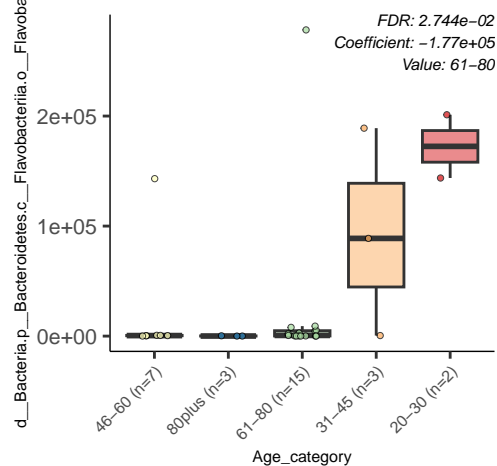

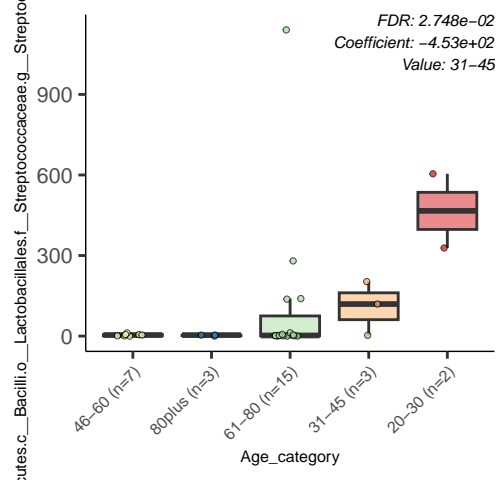

osilonproteobacteria.o\_\_Campylobacteriales.f\_\_Campylobacteraceae

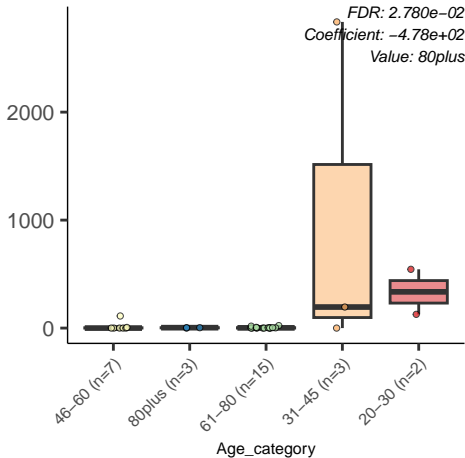

c\_\_Clostridia.o\_\_Eubacteriales.f\_\_Eubacteriales.Family.XIII...Incerta

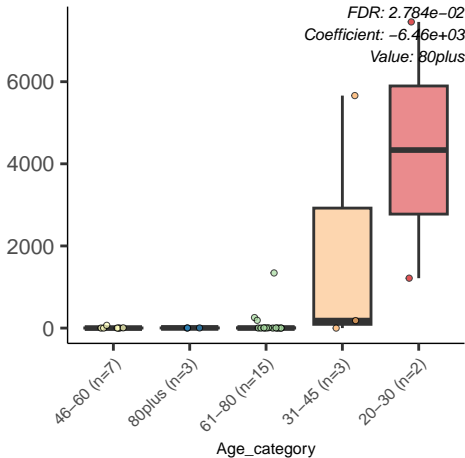

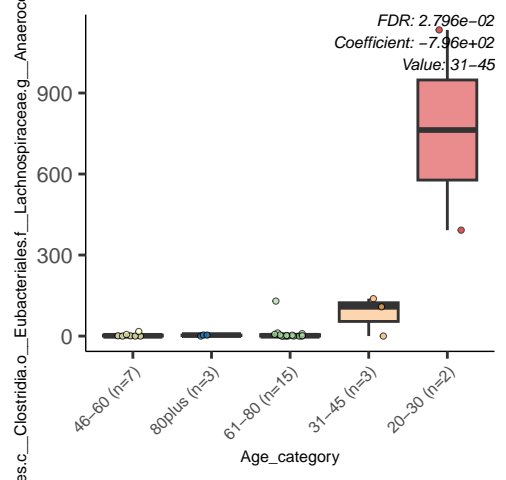

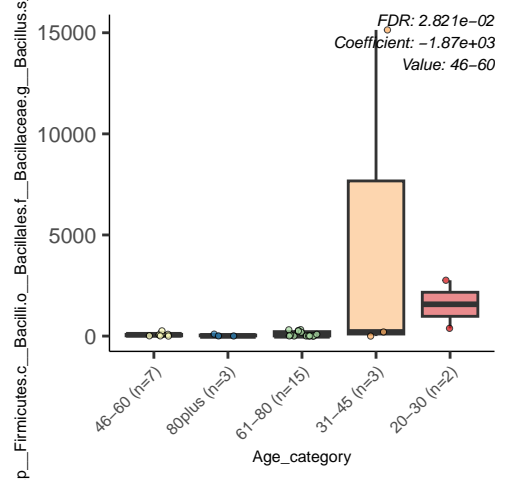

osilonproteobacteria.o\_\_Campylobacteriales.f\_\_Campylobacteraceae

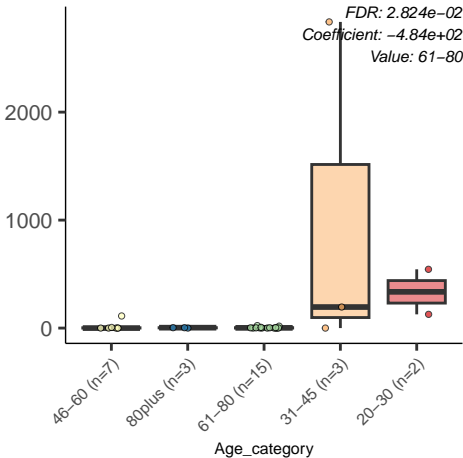

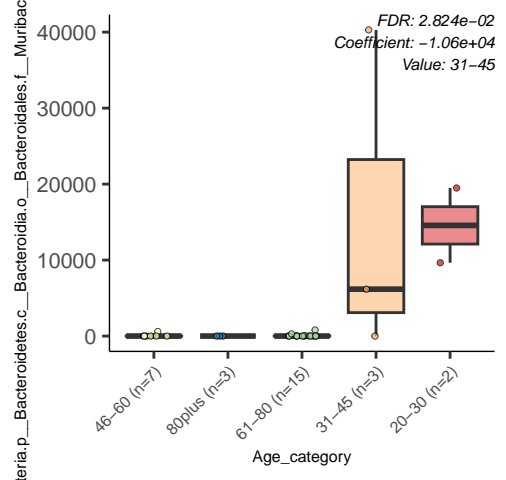



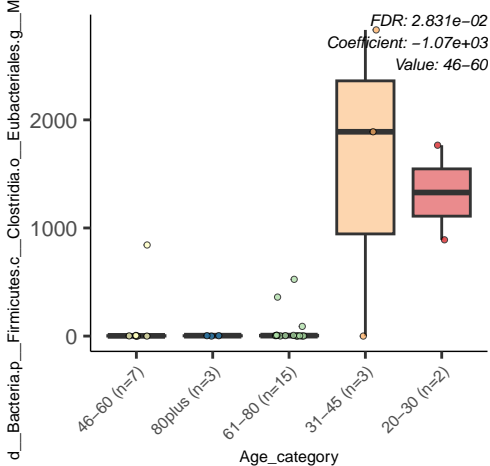

p\_\_Firmicutes.c\_\_Clostridia.o\_\_Eubacteriales.g\_\_Massilistercora.s

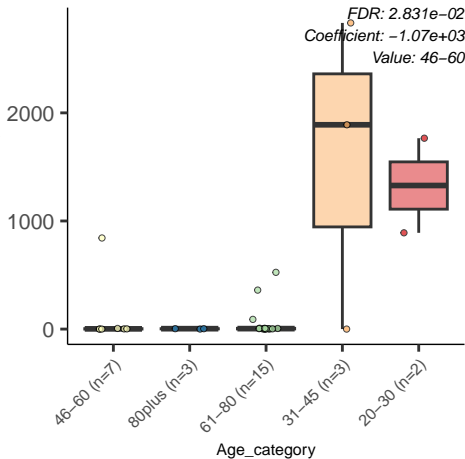

bacteria.c\_Actinomycetia.o\_Actinomycetales.f\_Actinomycetaceae

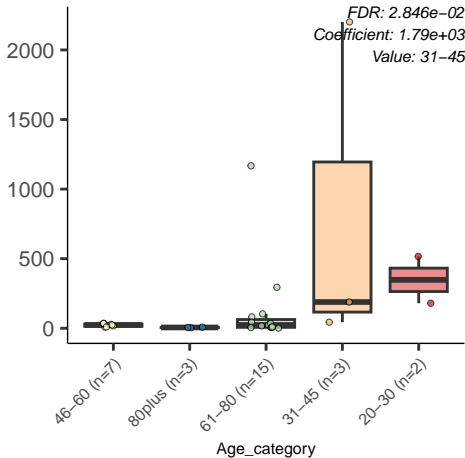

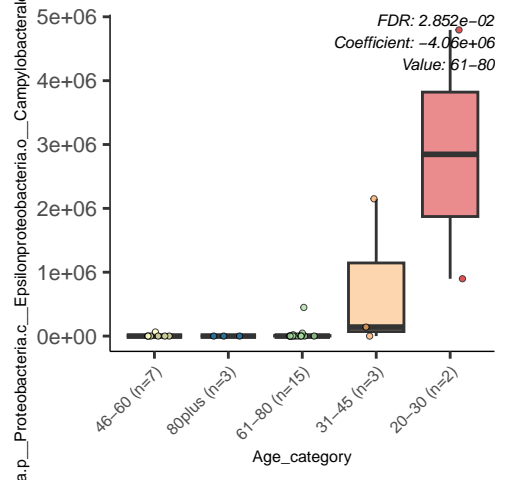

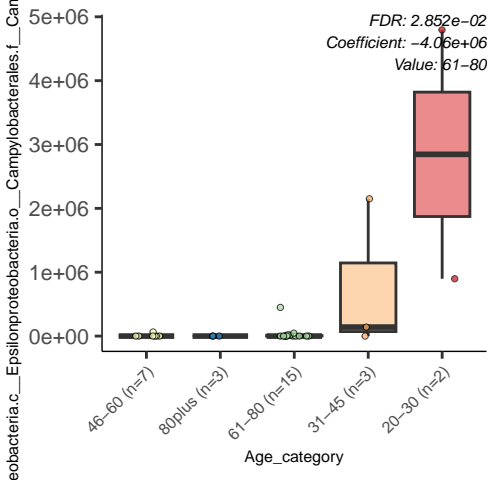

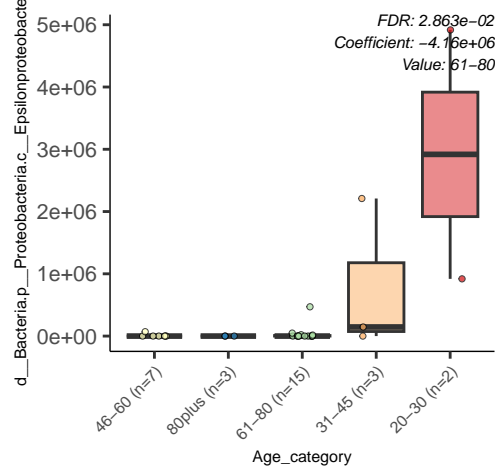

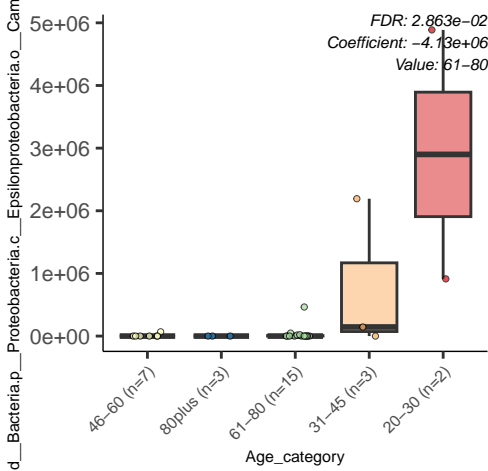

tertia.p\_\_Bacteroidetes.c\_\_Bacteroidia.o\_\_Bacteroidales.f\_\_Barnesi

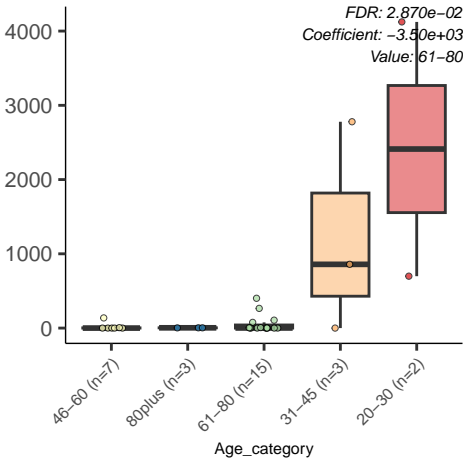



eroidetes.c\_\_Bacteroidia.o\_\_Bacteroidales.f\_\_Barnesiellaceae.g\_\_B

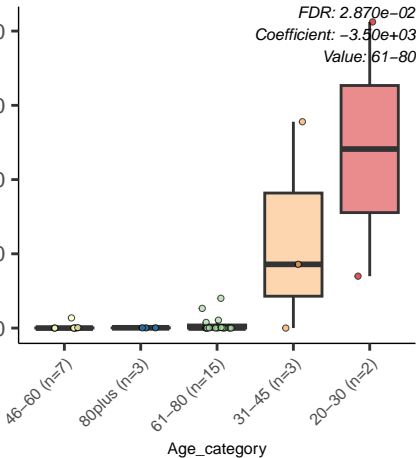

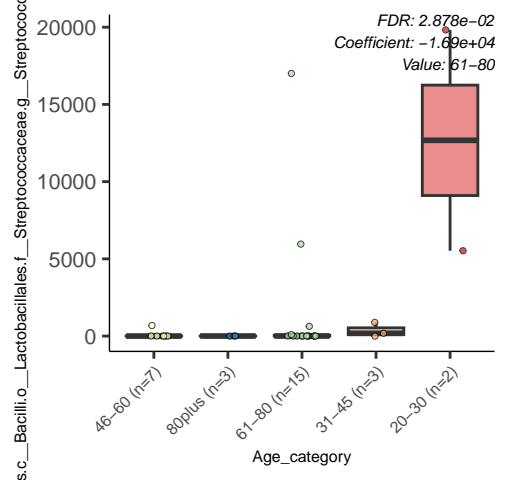

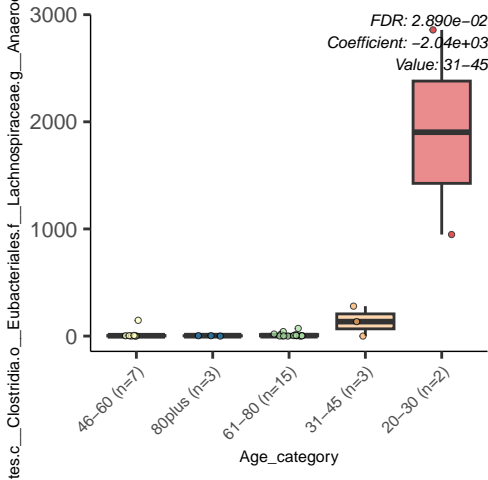

c\_Flavobacteriia.o\_Flavobacteriales.f\_Flavobacteriaceae.g\_Ca

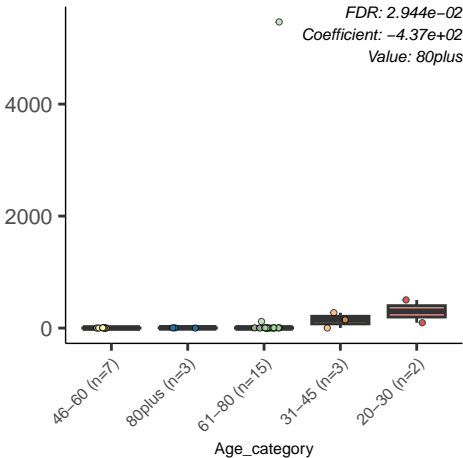

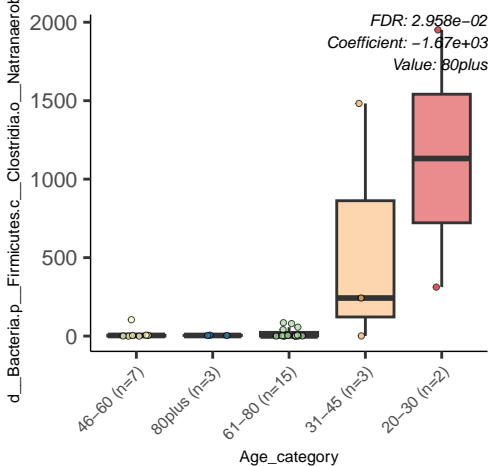

\_\_\_Epsilonproteobacteria.o\_\_Campylobacteriales.f\_\_Campylobacter

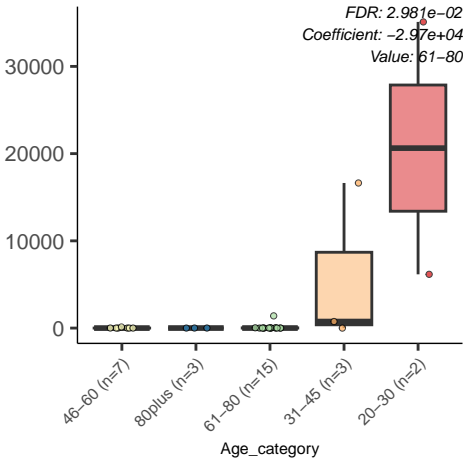

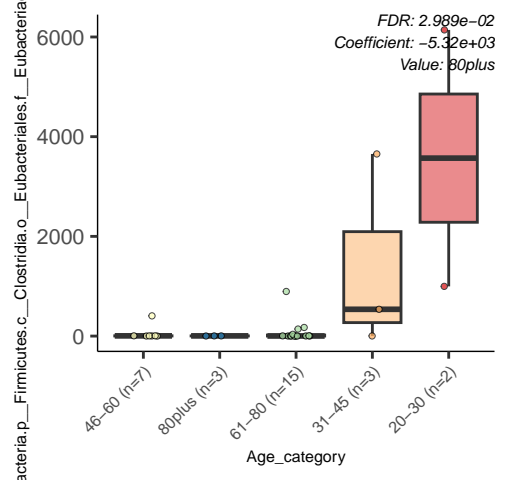

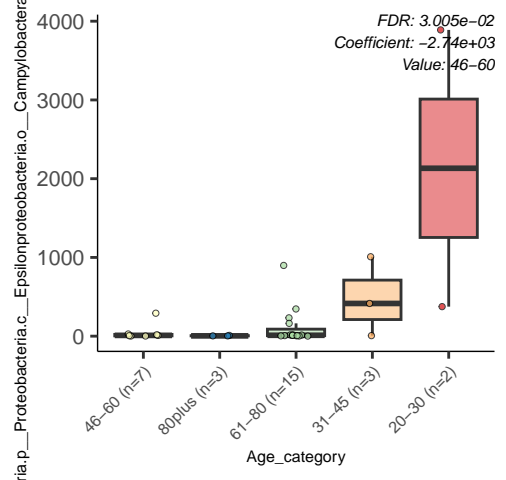



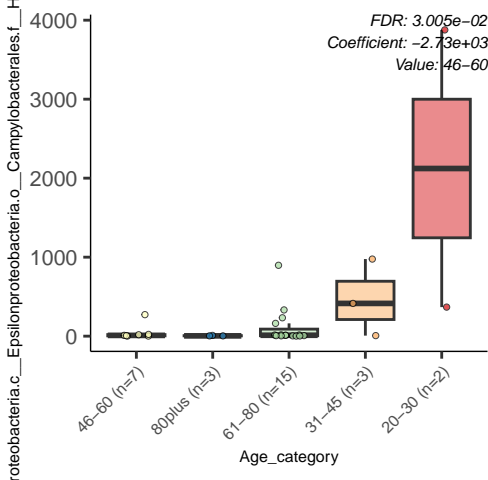

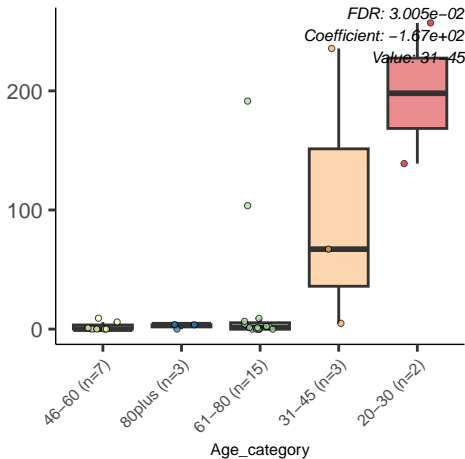

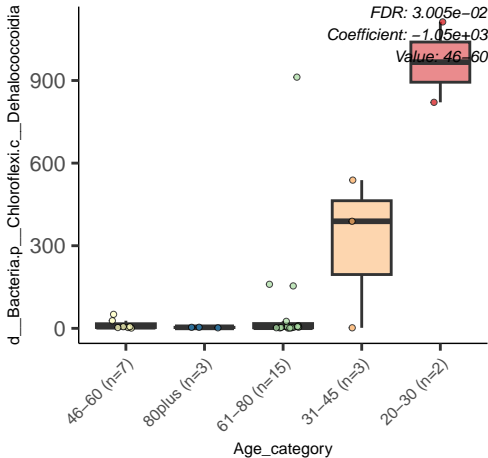

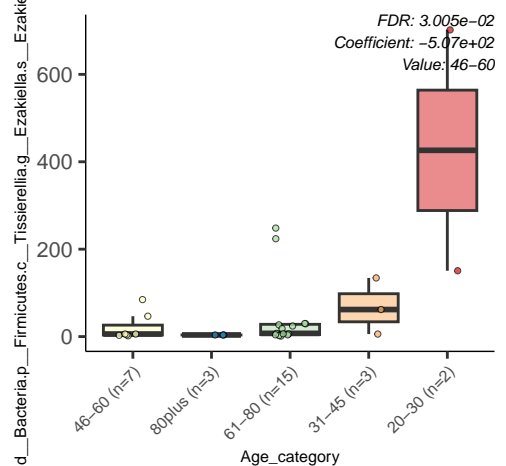

Firmicutes.c\_\_Clostridia.o\_\_Eubacteriales.f\_\_Eubacteriales.Family.

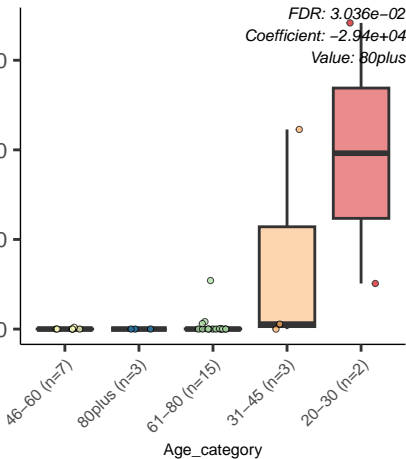

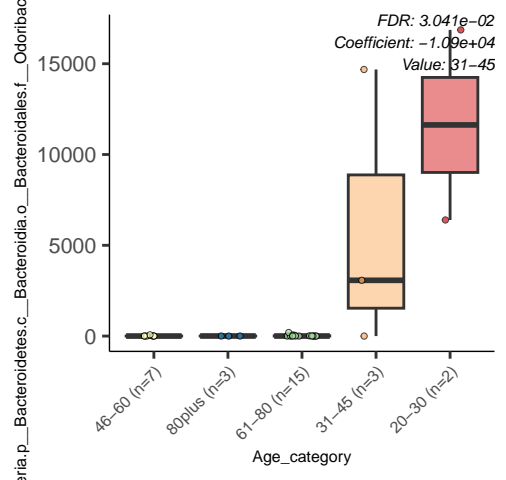

bidetes.c\_\_Bacteroidia.o\_\_Bacteroidales.f\_\_Odoribacteraceae.g\_\_O

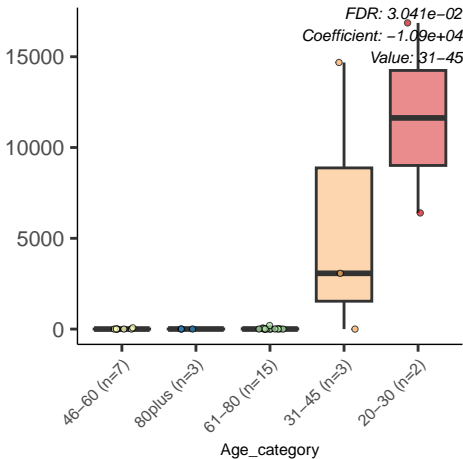

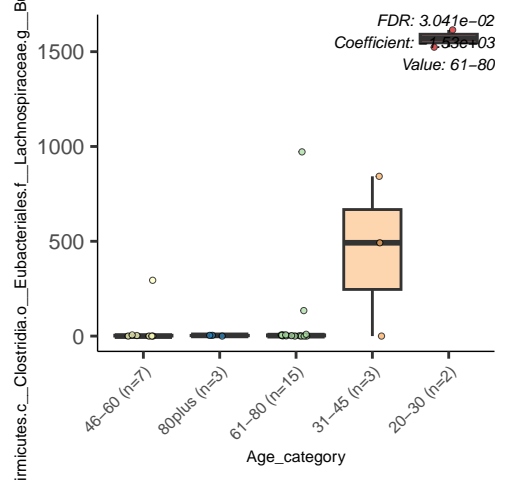



acteria.p\_\_Proteobacteria.c\_\_Betaproteobacteria.o\_\_Neisseriales.f

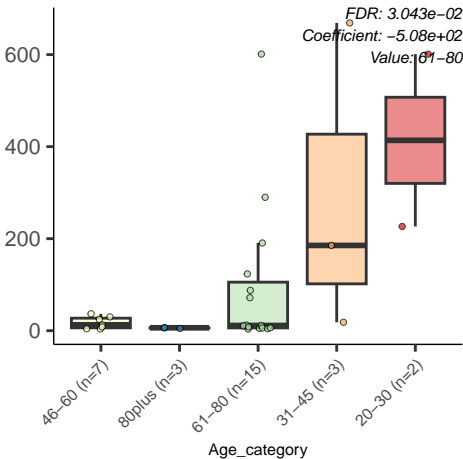

Actinomycetia.o\_\_Corynebacteriales.f\_\_Corynebacteriaceae.g

FDR: 3.050e-02  
Coefficient: 5.81e+03  
Value: 80plus

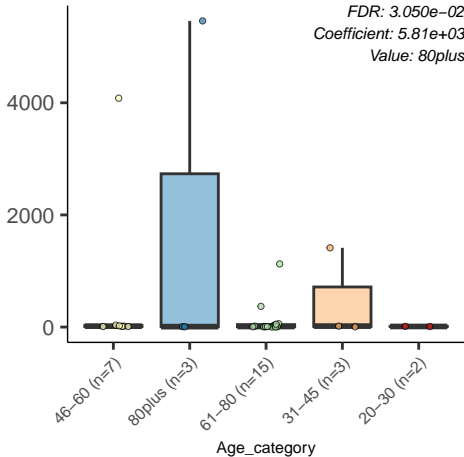

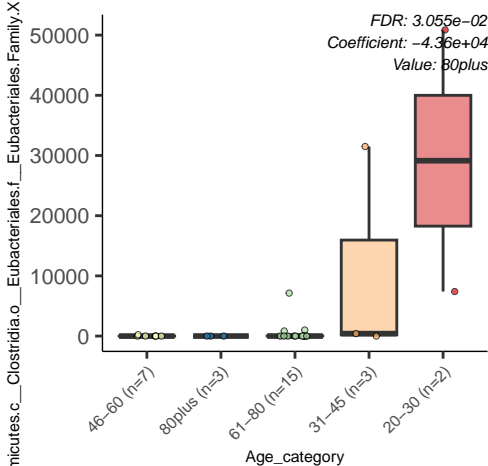

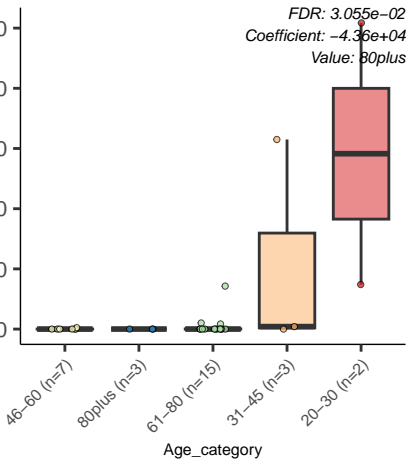

Epsilonproteobacteria.o\_\_Campylobacteriales.f\_\_Campylobacteraceae

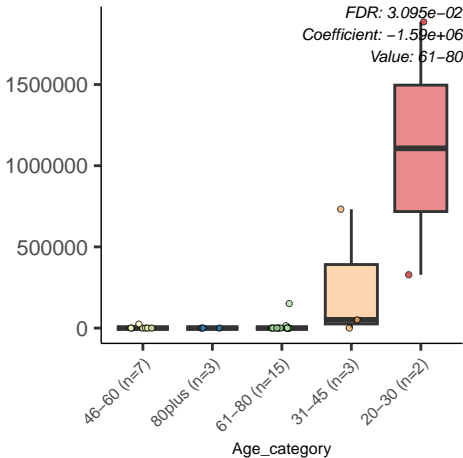

d\_\_Bacteria.p\_\_Deinococcus.Thermus

FDR:  $3.107e-02$   
Coefficient:  $-1.33e+03$   
Value: 46-60

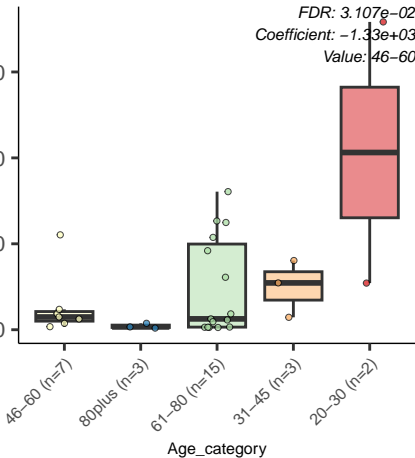

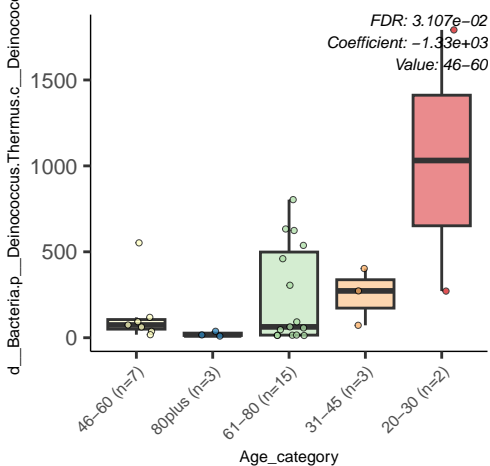

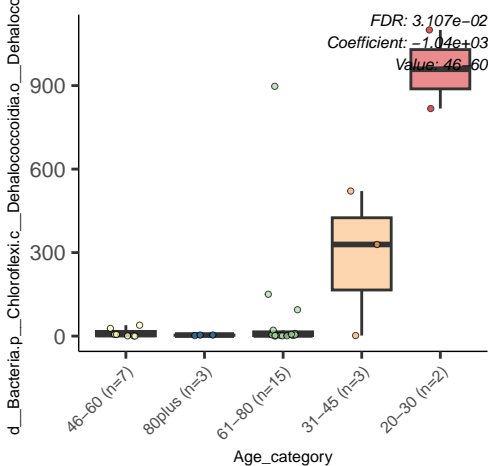



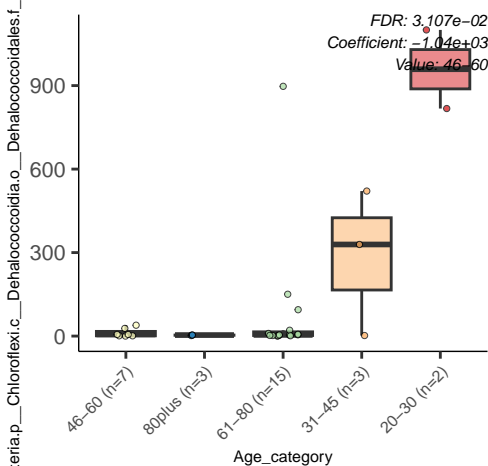

Chloroflexi.c\_\_Dehalococcoidia.o\_\_Dehalococcoidales.f\_\_Dehaloco

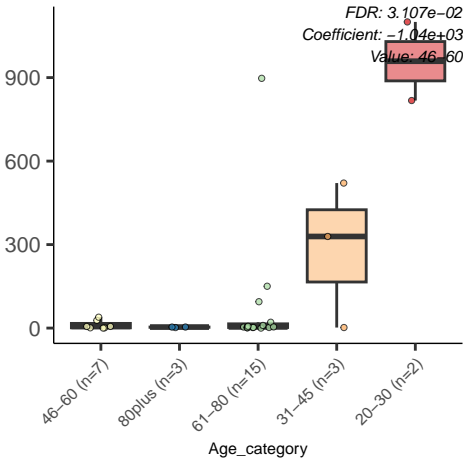

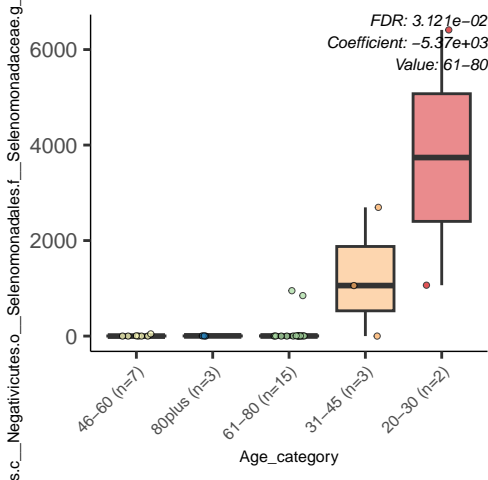

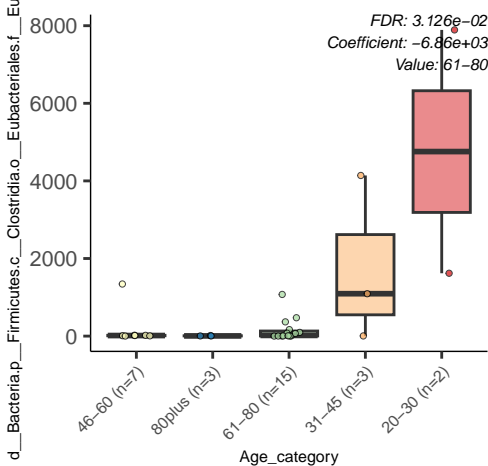

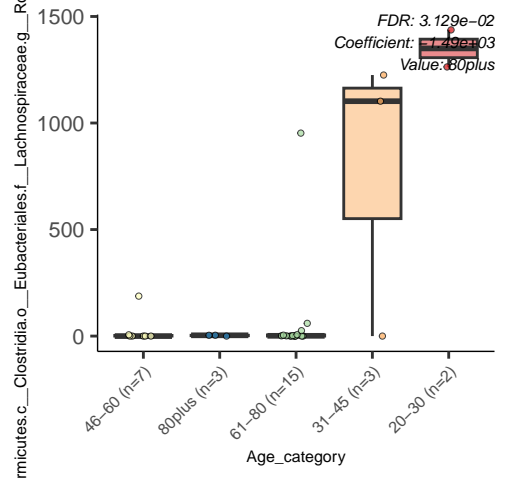

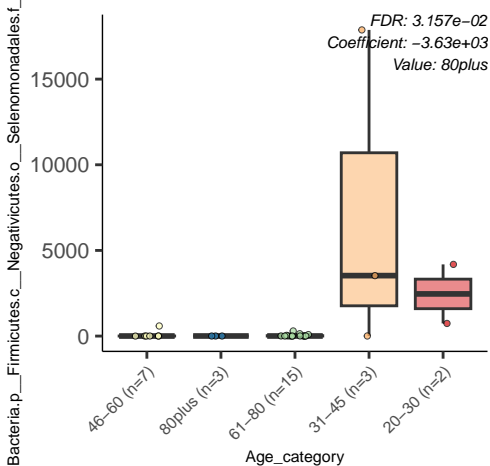

c\_\_Clostridia.o\_\_Eubacteriales.f\_\_Eubacteriales.Family.XIII..Incerta

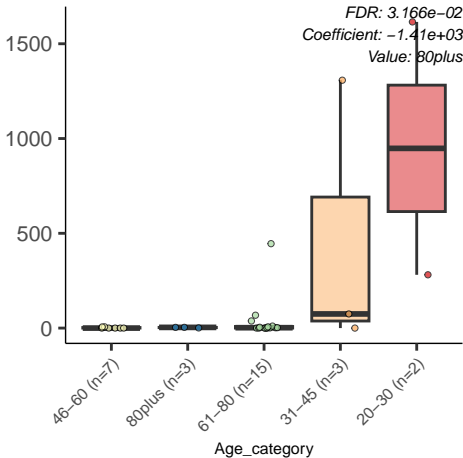

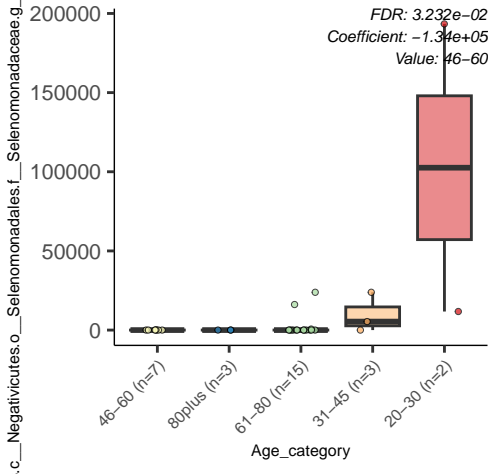



bacteria.c\_\_Fusobacteriia.o\_\_Fusobacteriales.f\_\_Leptotrichiaceae.g\_\_

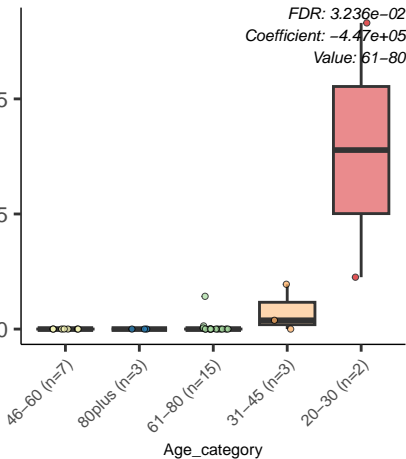

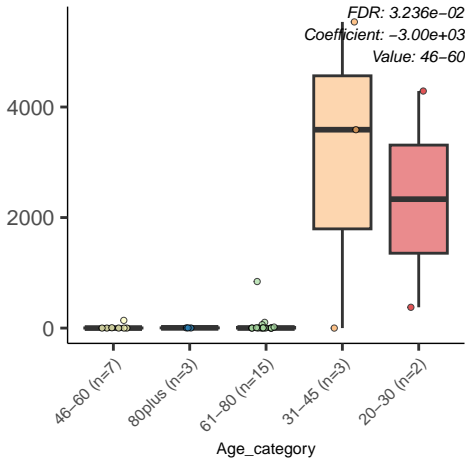

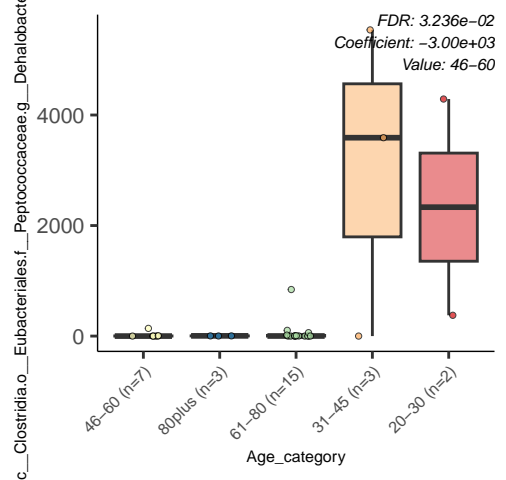

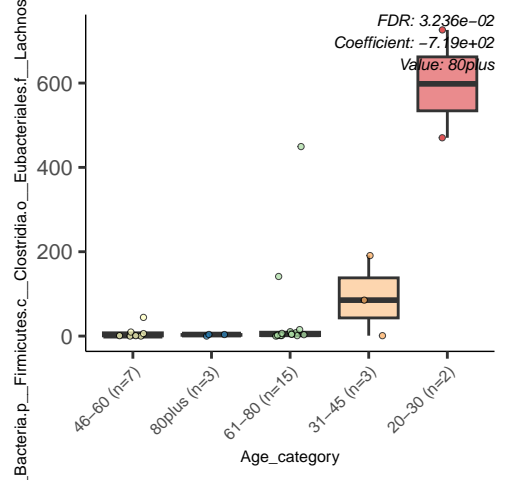

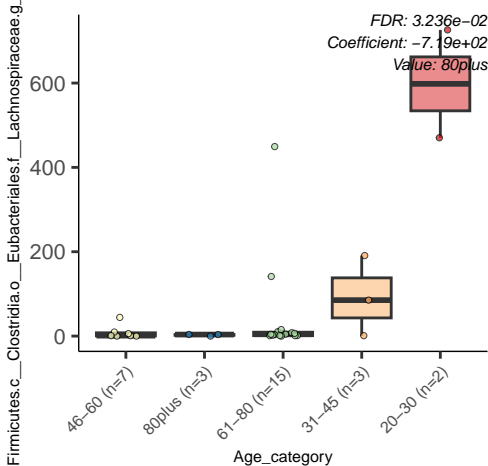

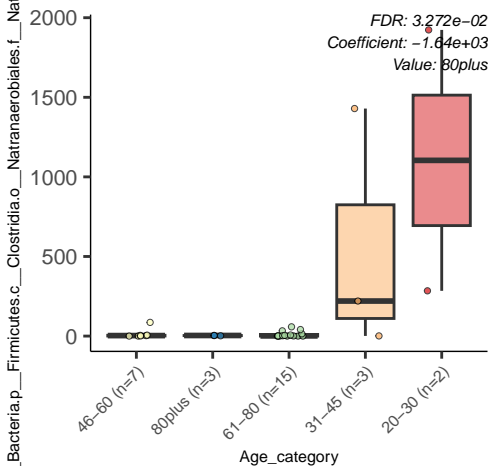

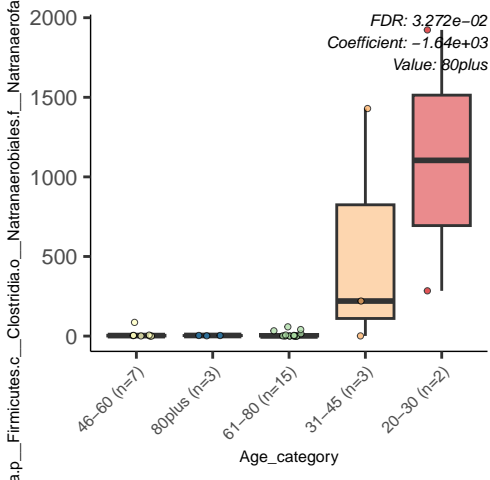

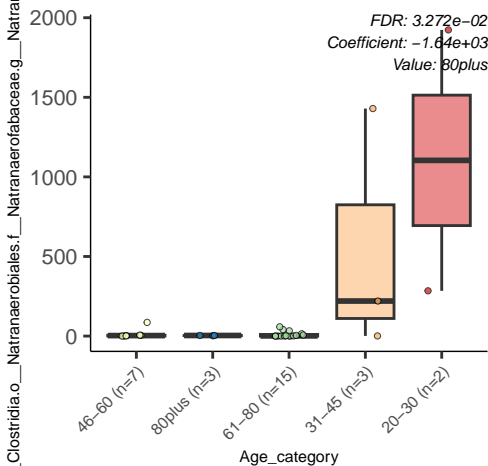



o\_\_Proteobacteria.c\_\_Gammaproteobacteria.o\_\_Thiotrichales.f\_\_Fr

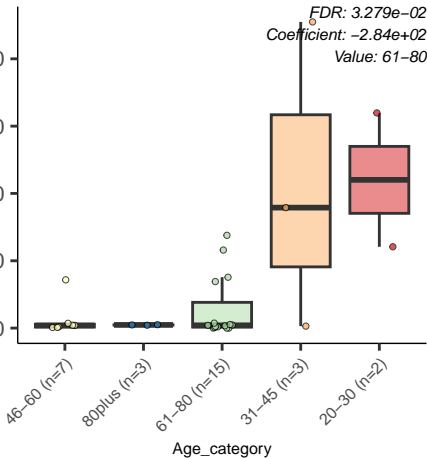

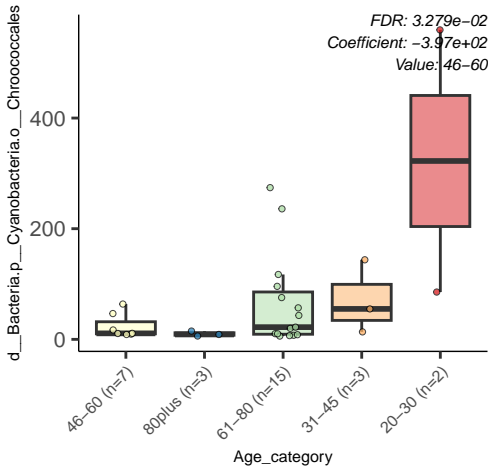

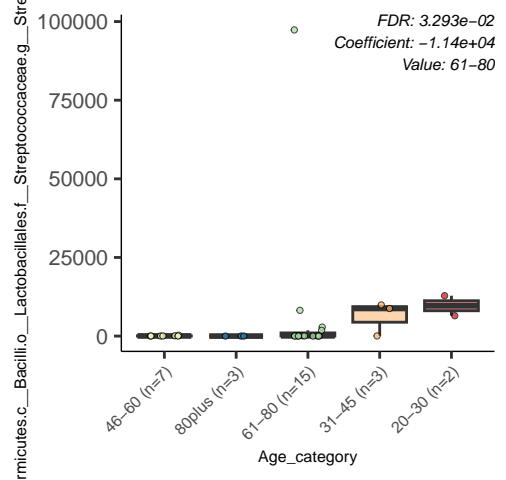

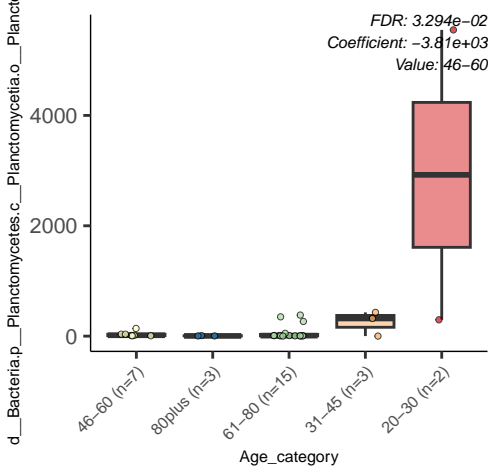

acteria.p\_\_Planctomycetes.c\_\_Planctomycetia.o\_\_Planctomycetales.

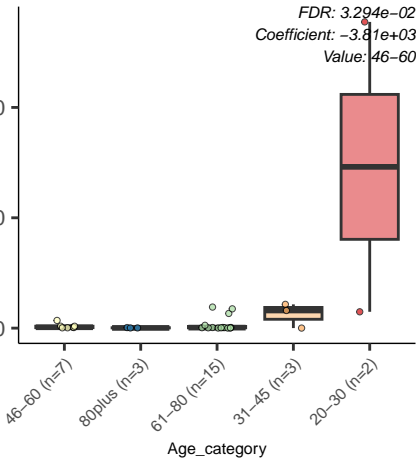

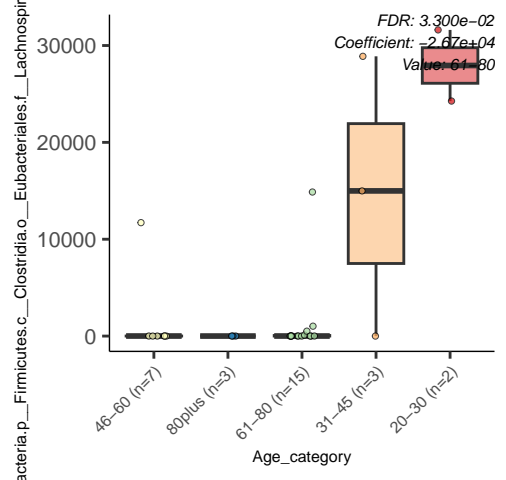

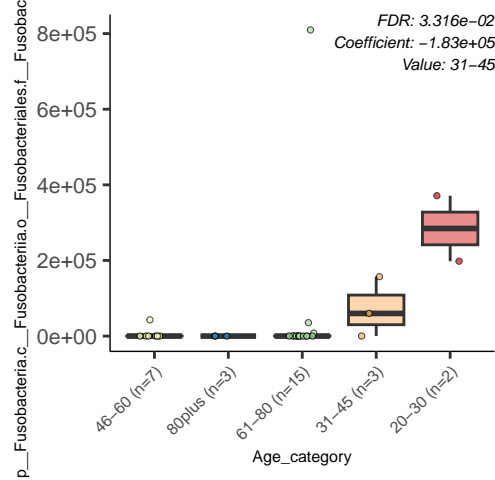

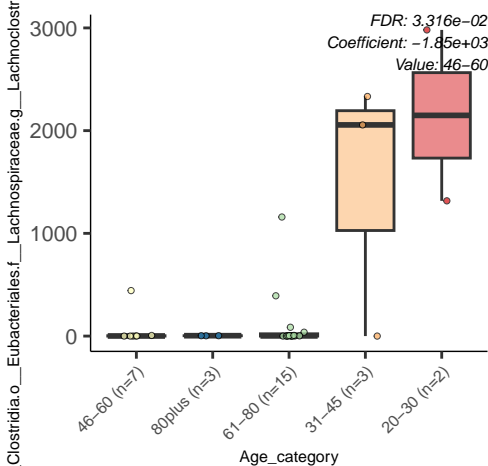



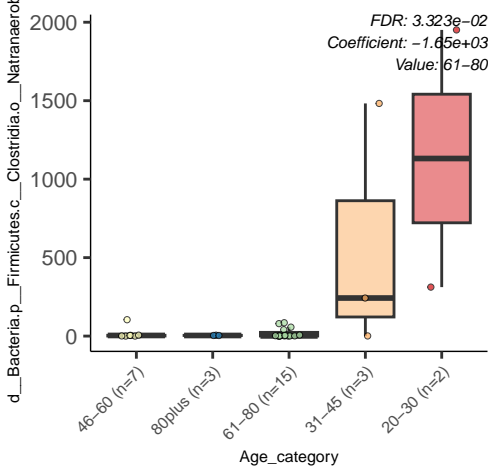

a.p\_\_Bacteroidetes.c\_\_Flavobacteriia.o\_\_Flavobacteriales.f\_\_Flavob

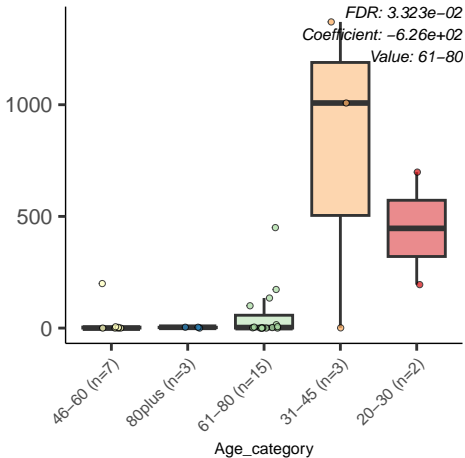

eria.p\_\_Bacteroidetes.c\_\_Bacteroidia.o\_\_Bacteroidales.f\_\_Muribac

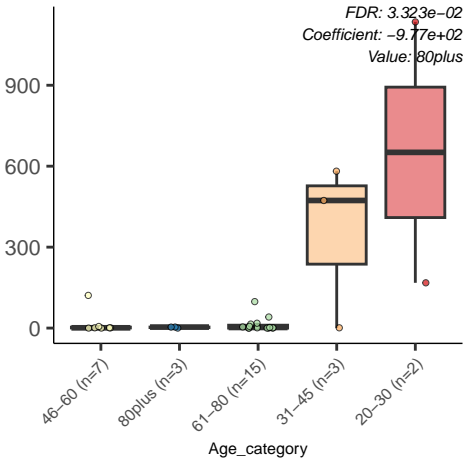

oidetes.c\_\_Bacteroidia.o\_\_Bacteroidales.f\_\_Muribaculaceae.g\_\_So

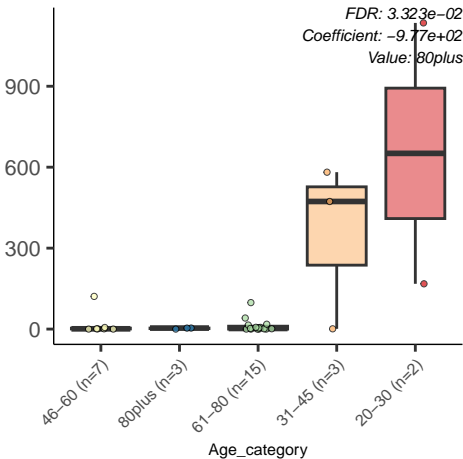

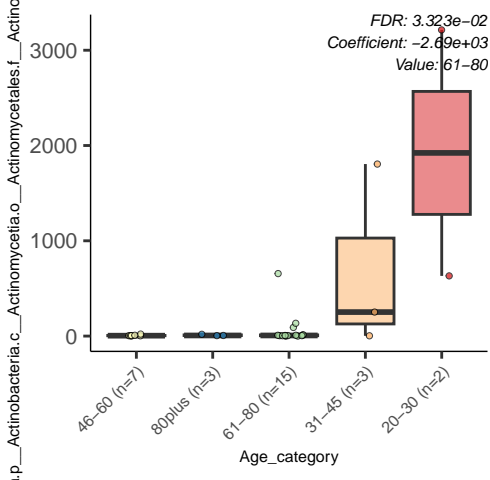

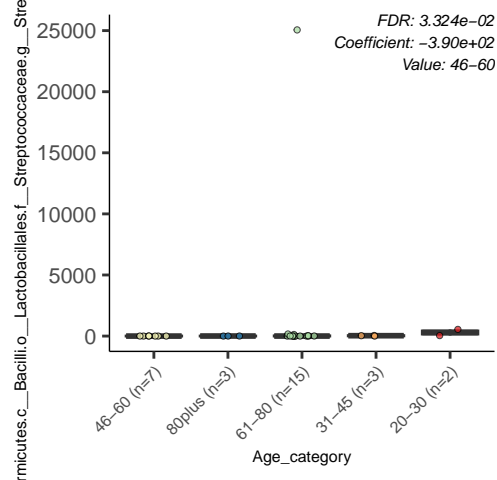

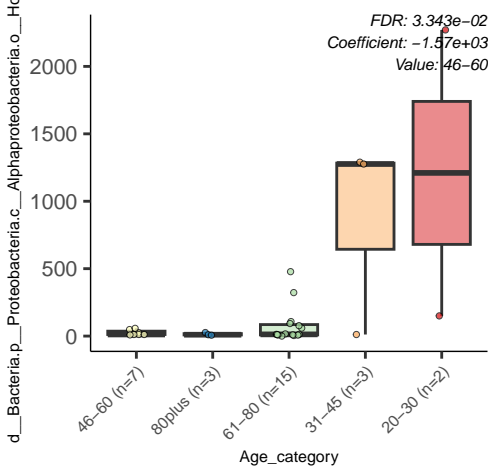

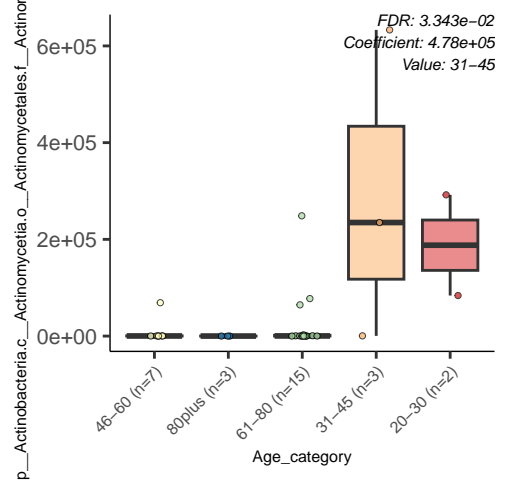



eria.p\_\_Firmicutes.c\_\_Bacilli.o\_\_Bacillales.f\_\_Thermoactinomyce

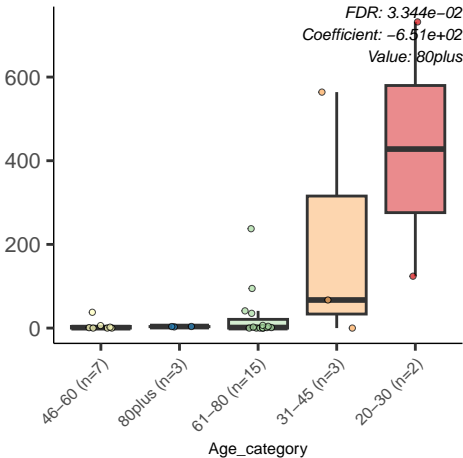

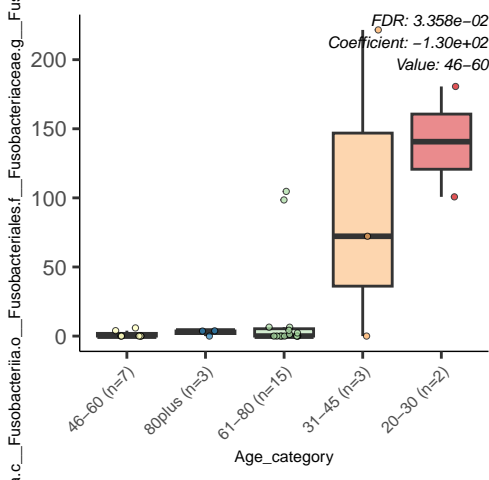

bacteria.c\_\_Betaproteobacteria.o\_\_Neisseriales.f\_\_Neisseriaceae.g

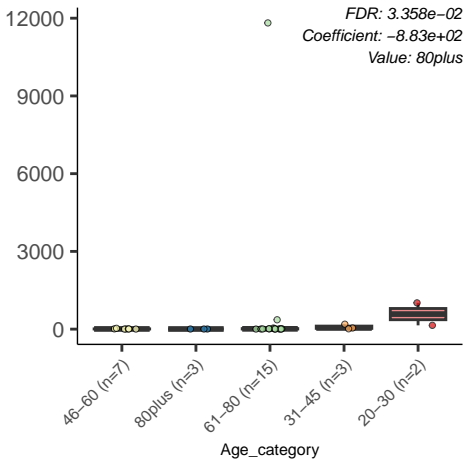

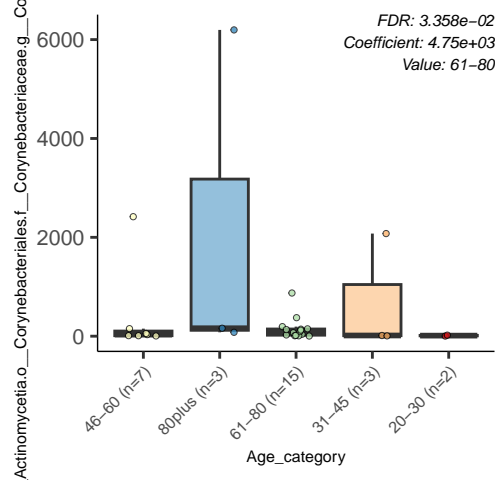

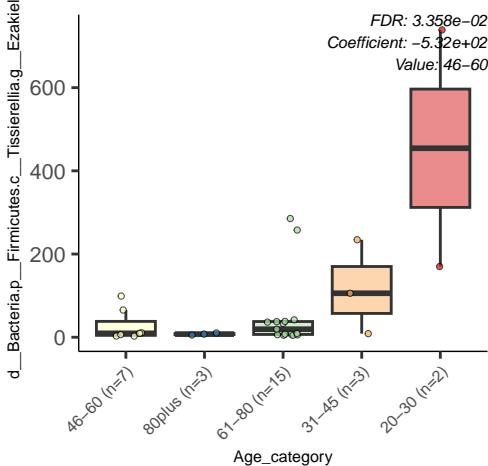

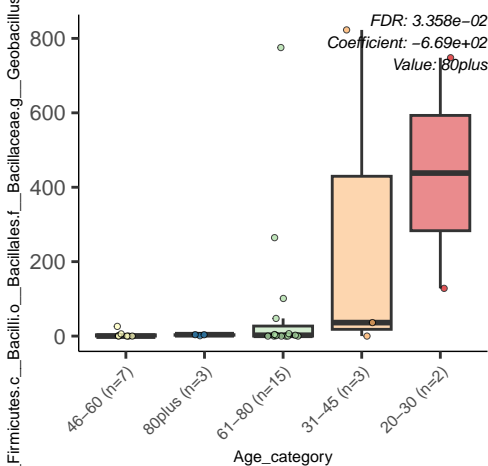

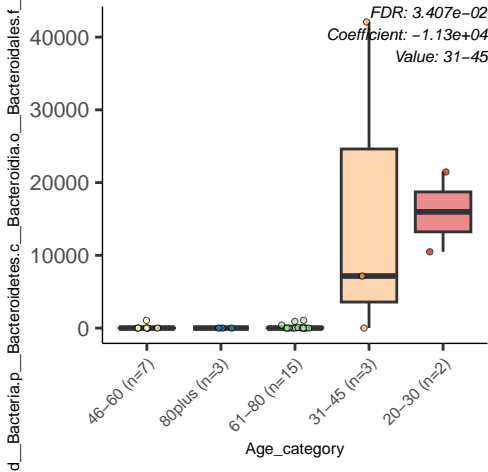

Bacteria.p\_\_Proteobacteria.c\_\_Alphaproteobacteria.o\_\_Holosporales

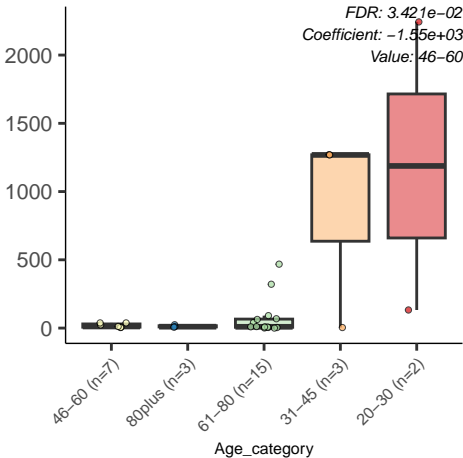



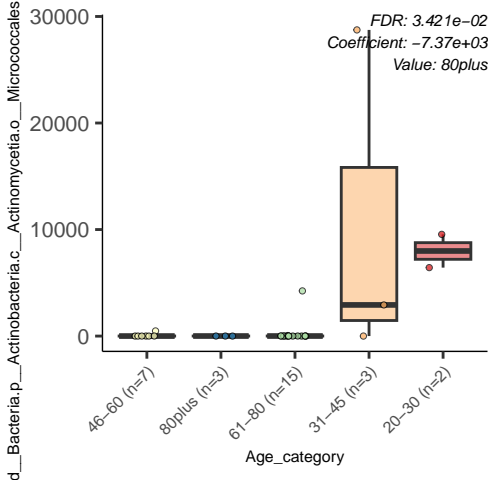

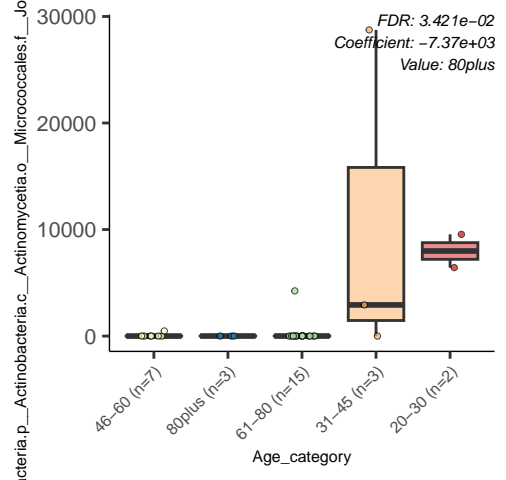

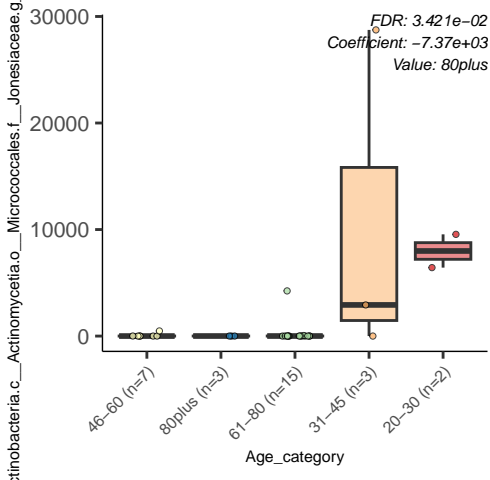

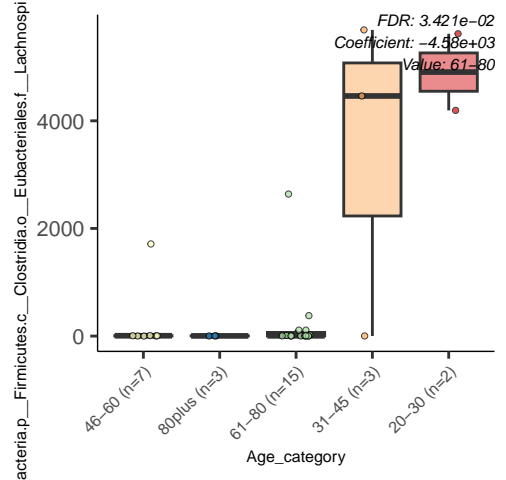

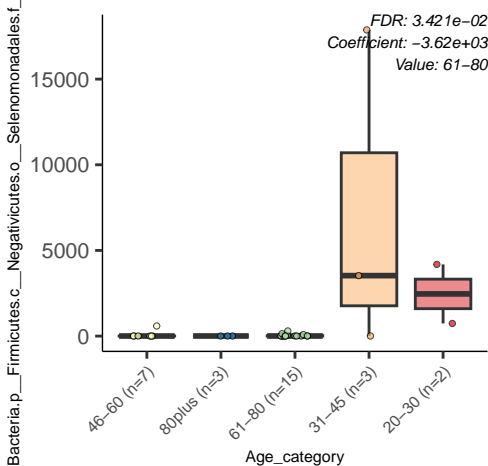

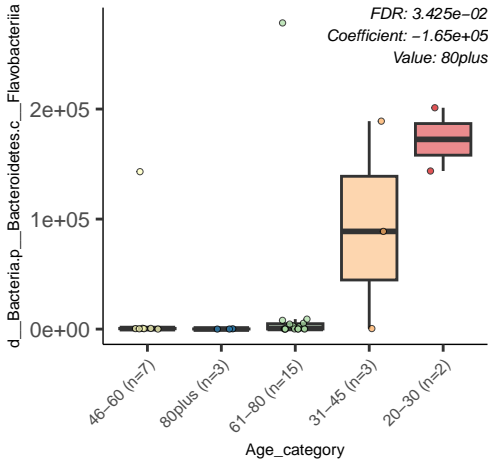

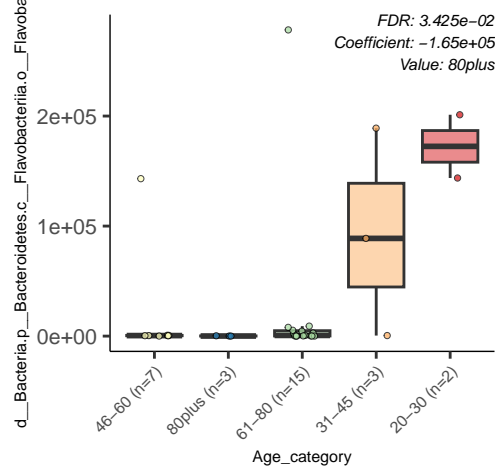

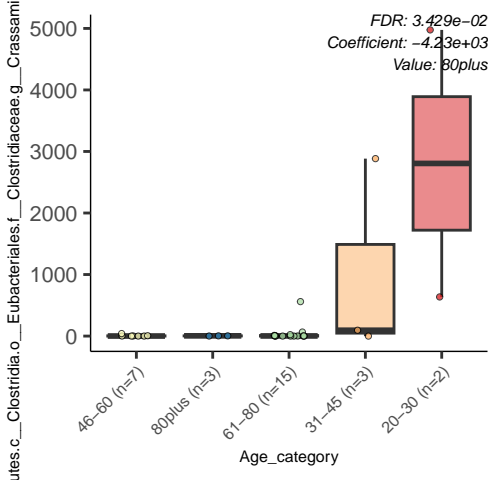



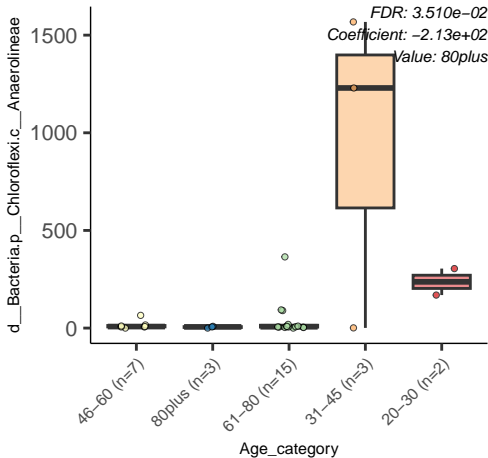

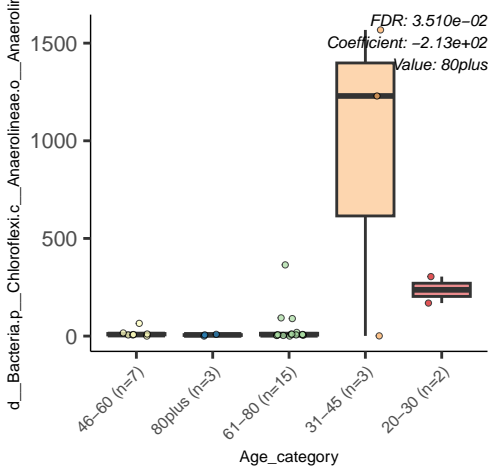

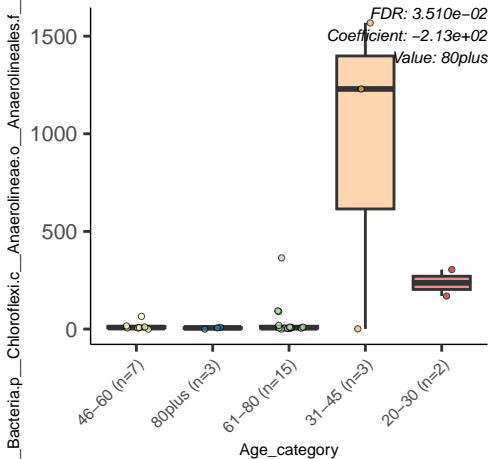

c\_\_Clostridia.o\_\_Eubacteriales.f\_\_Eubacteriales.Family.XIII...Incerta

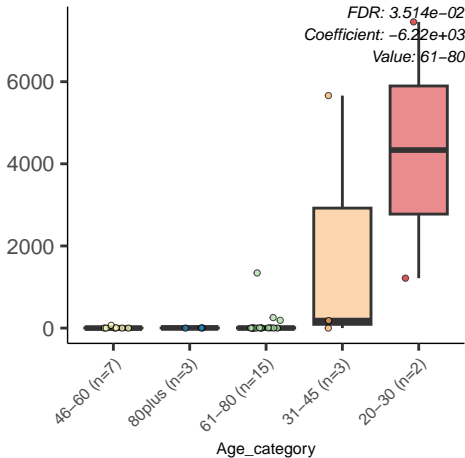

terial.p\_\_Firmicutes.c\_\_Tissierelliales.o\_\_Tissierellales.f\_\_Peptoniphila

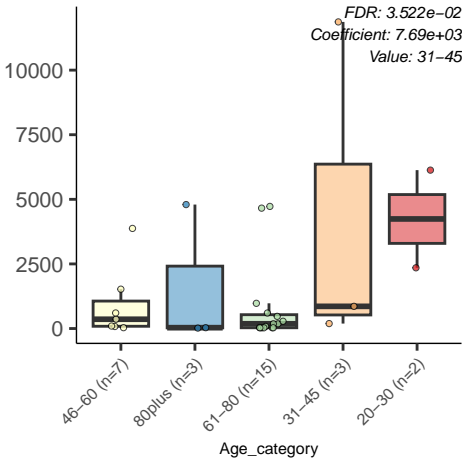

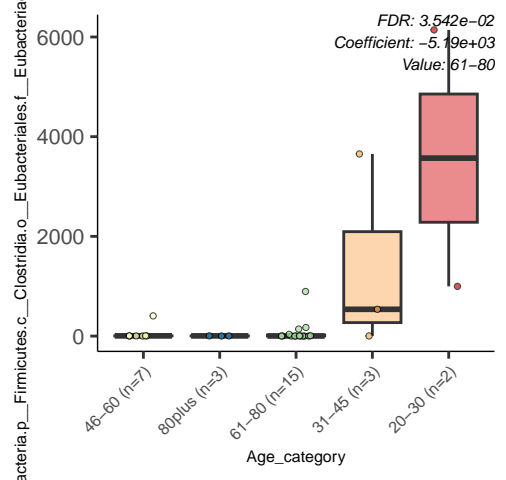

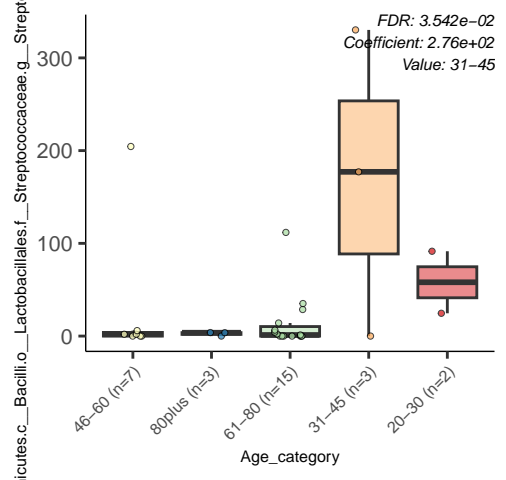

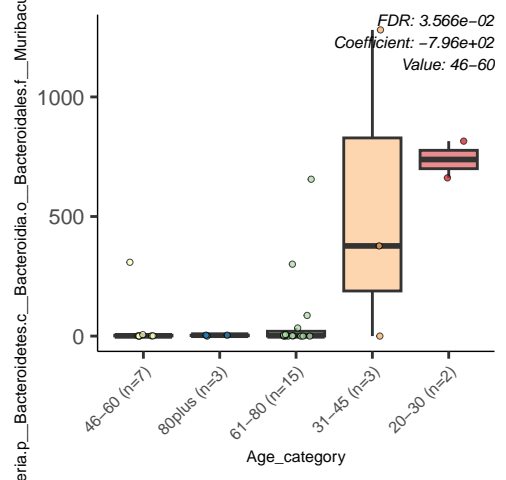



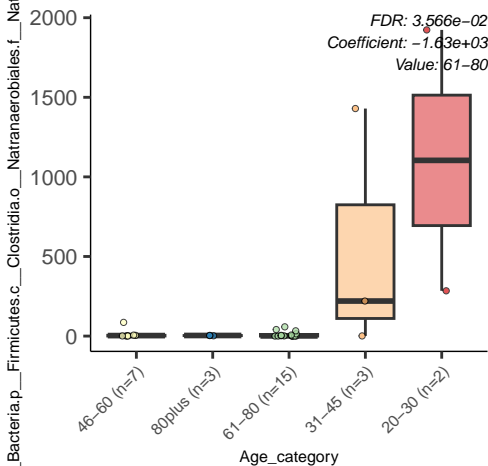

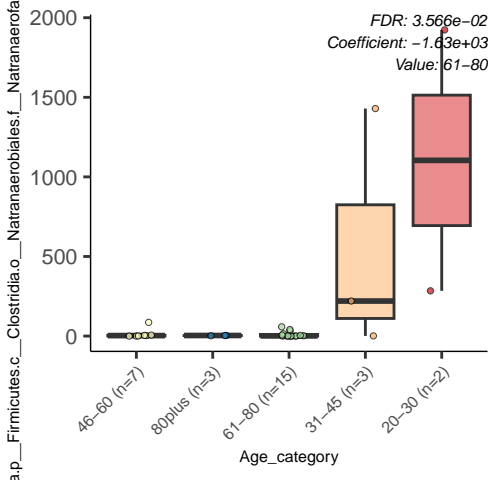

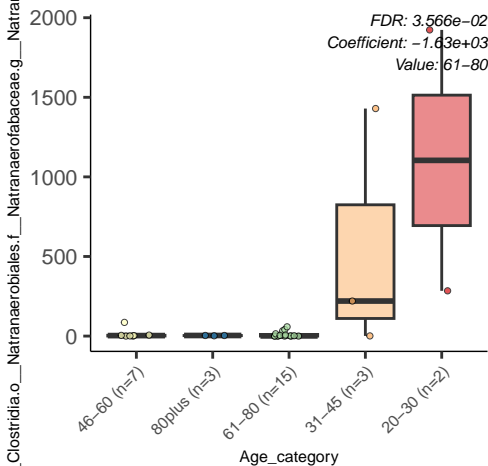

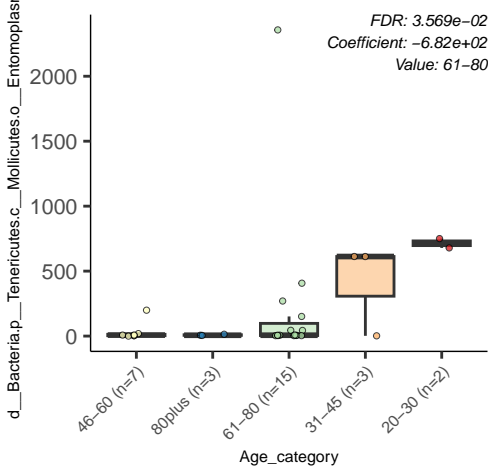

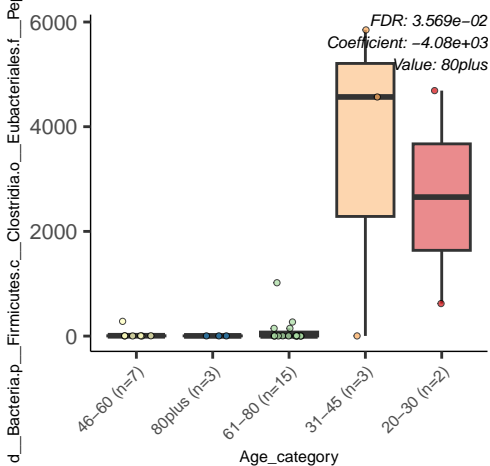

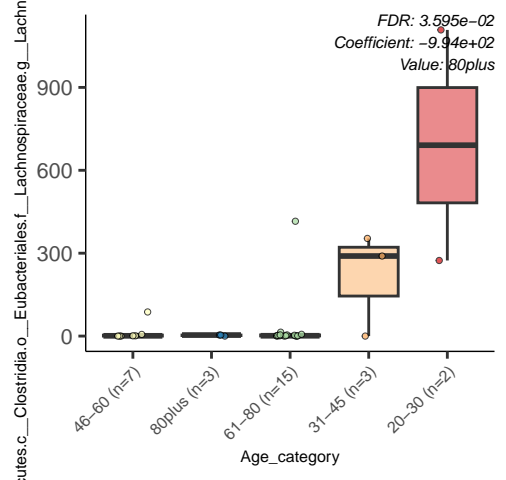

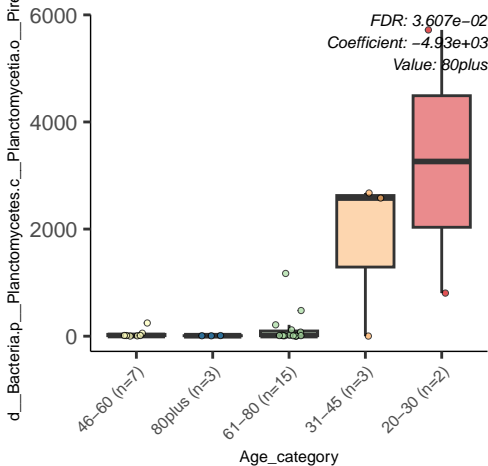

Firmicutes.c\_\_Clostridia.o\_\_Eubacteriales.f\_\_Lachnospiraceae.g\_\_

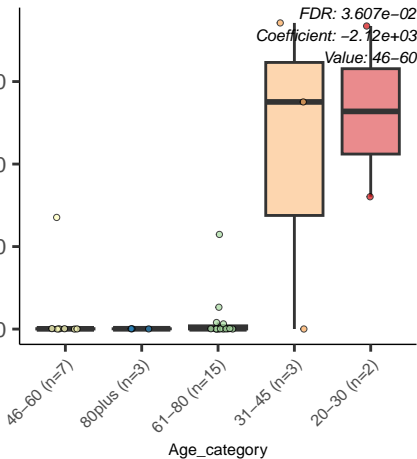



d\_Bacteria.p\_\_Spirochaetes

1e+05

5e+04

0e+00

FDR: 3.610e-02  
Coefficient: -2.72e+04  
Value: 46-60

46-60 (n=7)

80plus (n=3)

61-80 (n=15)

31-45 (n=3)

20-30 (n=2)

Age\_category

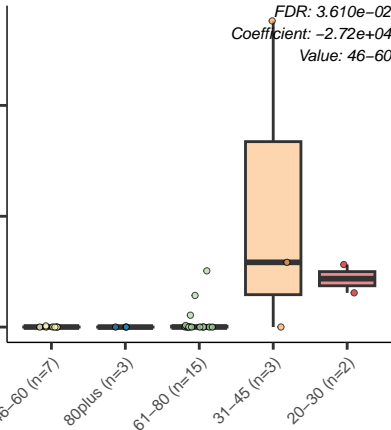

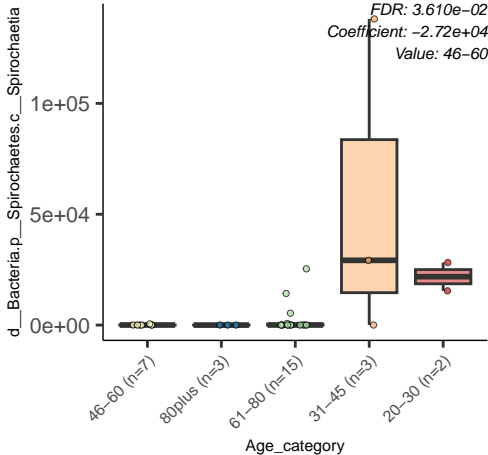

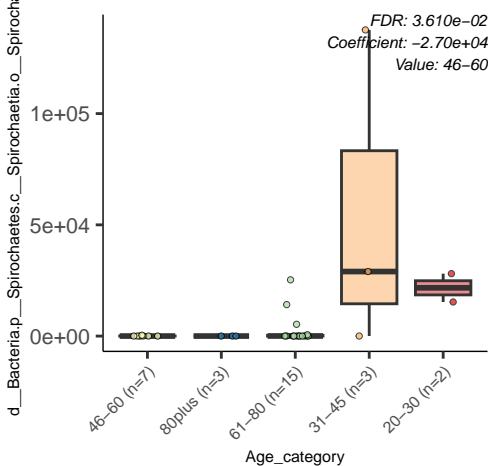

d\_Bacteria.p\_Planctomycetes

FDR:  $3.610e-02$   
Coefficient:  $-1.02e+04$   
Value: 80plus

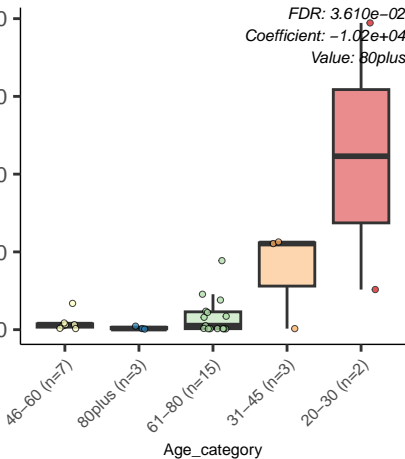

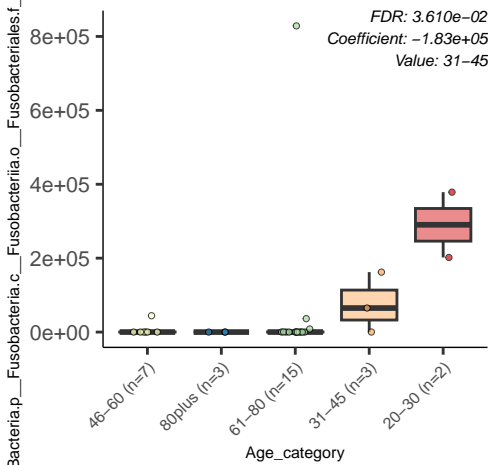

eria.p\_\_Bacteroidetes.c\_\_Bacteroidia.o\_\_Bacteroidales.f\_\_Muribac

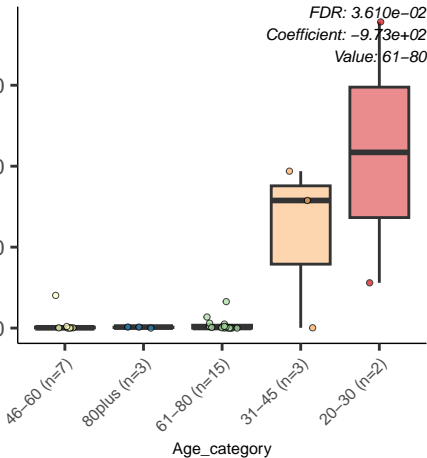

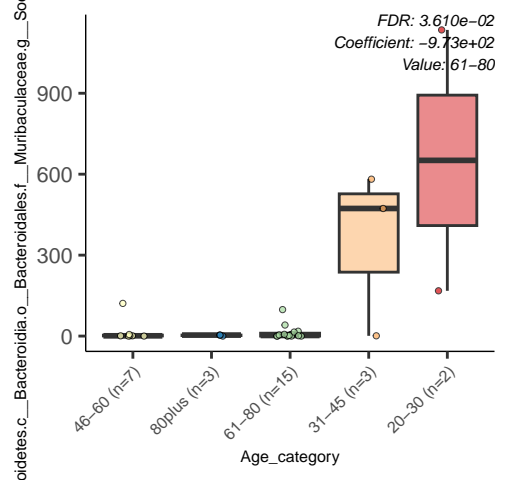

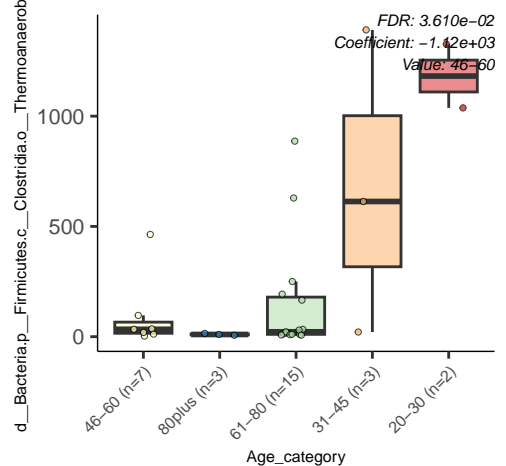



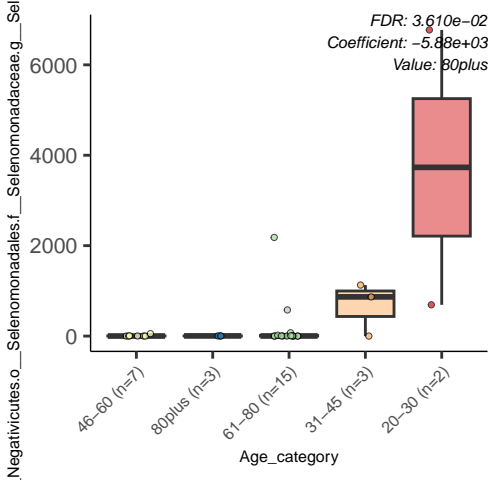

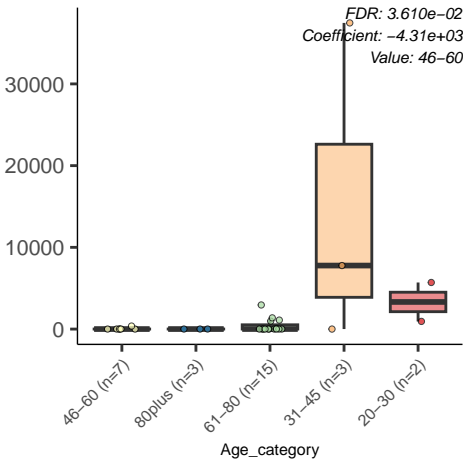

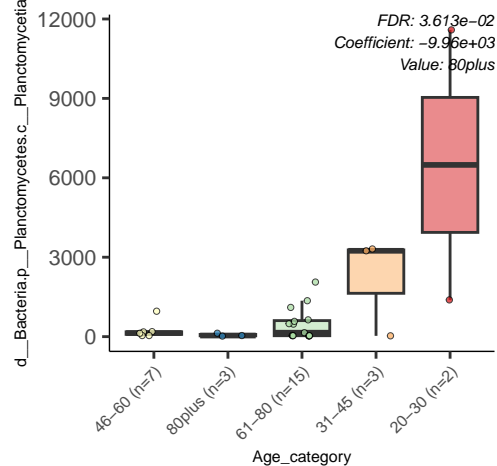

rmicutes.c\_\_Tissierellia.o\_\_Tissierellales.f\_\_Peptoniphilaceae.g\_\_P

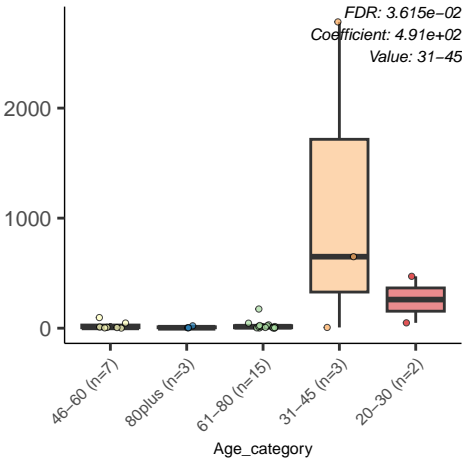

a.p\_Firmicutes.c\_Clostridia.o\_Eubacteriales.f\_Desulfotobacteria

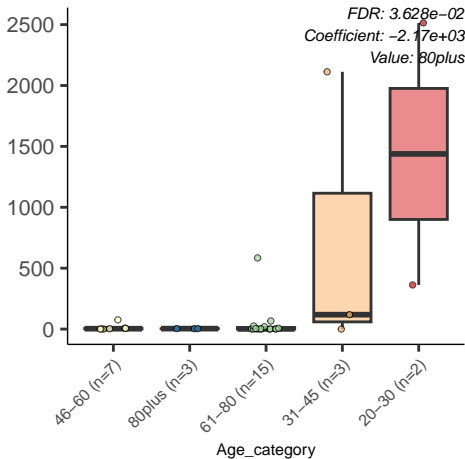

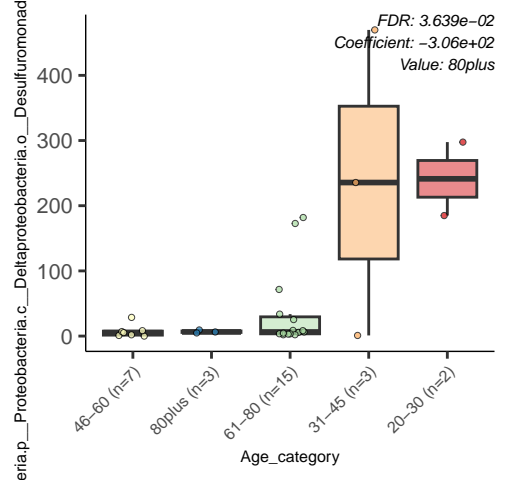

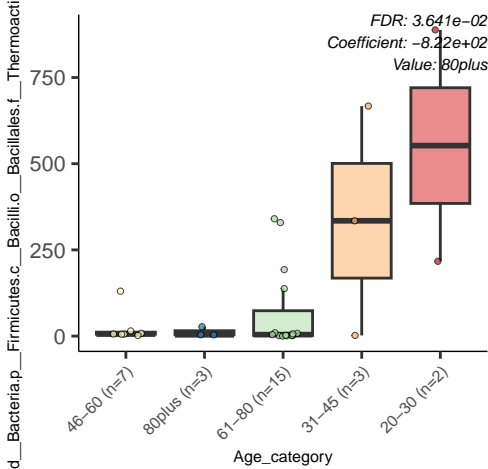

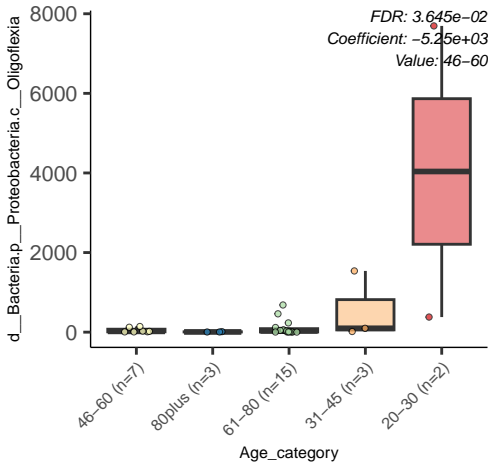



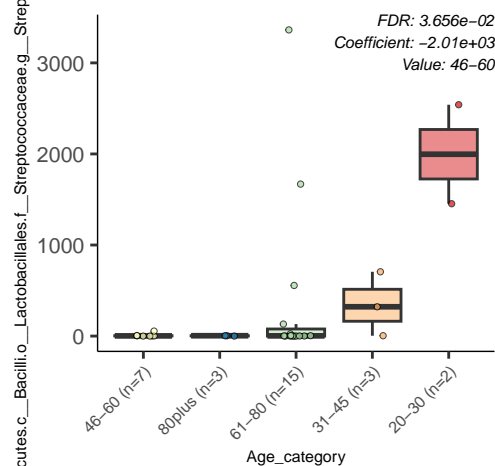

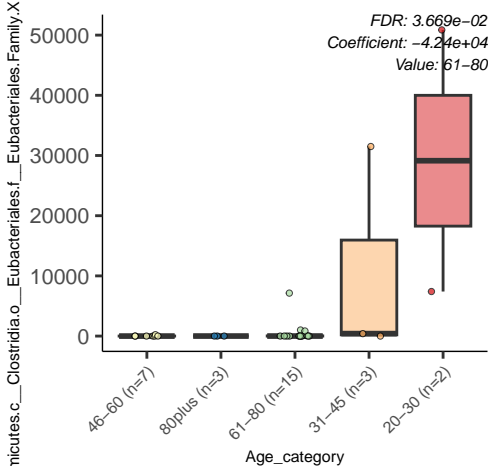

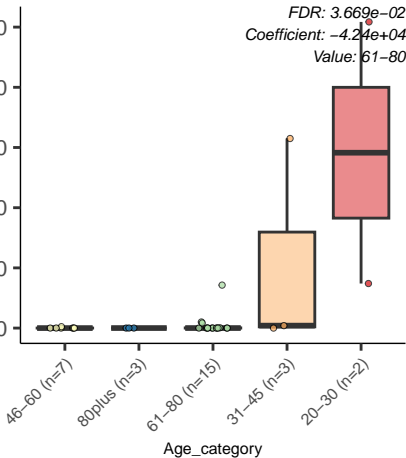

maproteobacteria.o\_\_Cardiobacteriales.f\_\_Cardiobacteriaceae.g\_\_C

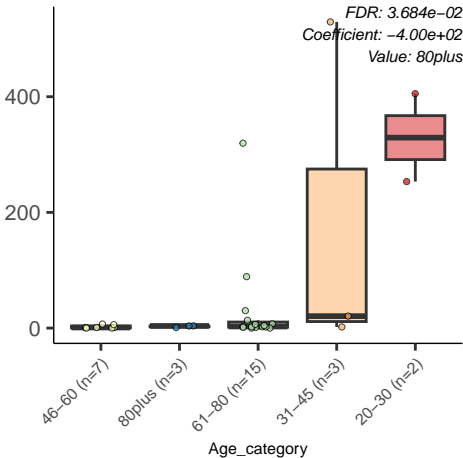

bacteria.p\_\_Proteobacteria.c\_\_Gammaproteobacteria.o\_\_Thiotrichales

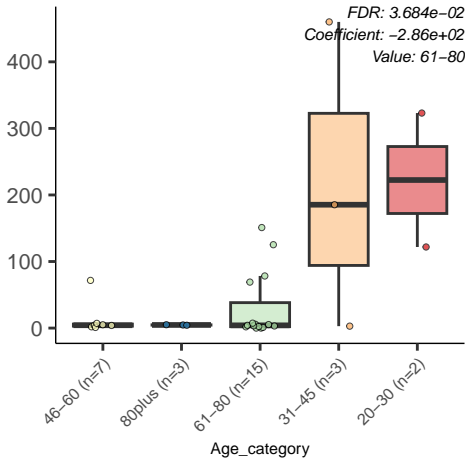

c\_Flavobacteriia.o\_Flavobacteriales.f\_Flavobacteriaceae.g\_Ca

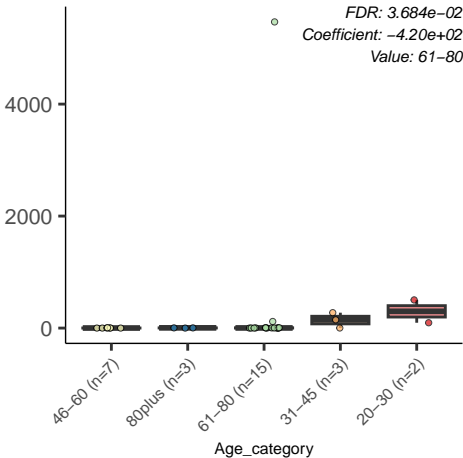

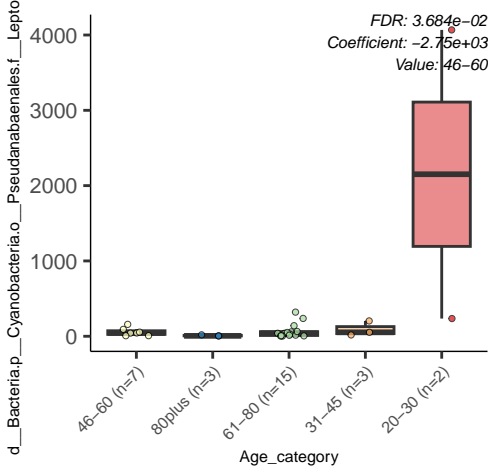

Firmicutes.c\_\_Clostridia.o\_\_Eubacteriales.f\_\_Eubacteriales.Family.

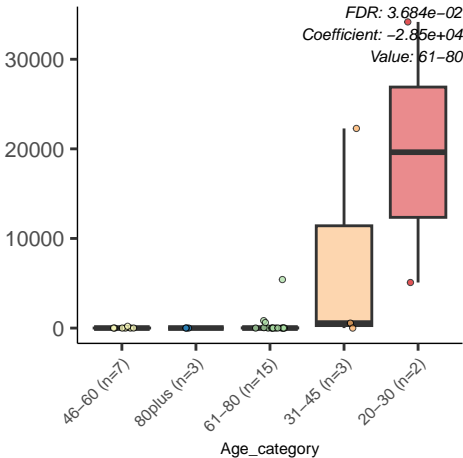



d\_Bacteria.p\_\_Proteobacteria.c\_\_Oligoflexia.o\_\_Bacteriov

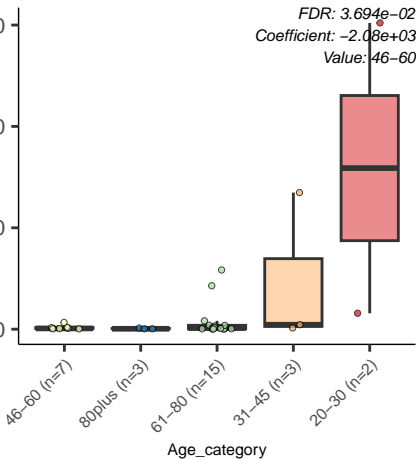

seria.p\_\_Bacteroidetes.c\_\_Cytophagia.o\_\_Cytophagales.f\_\_Fulviving

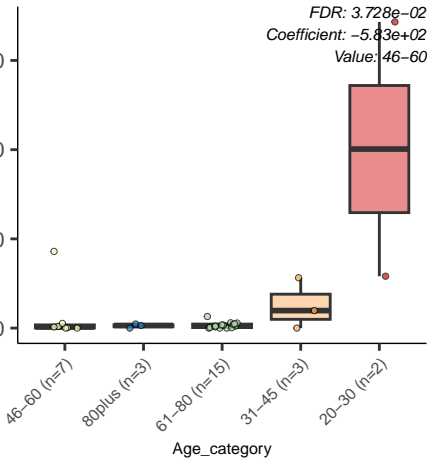

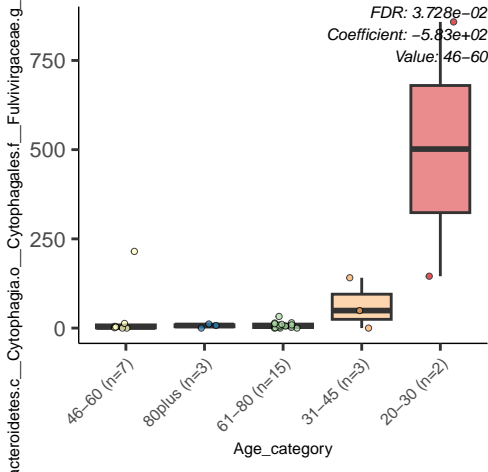

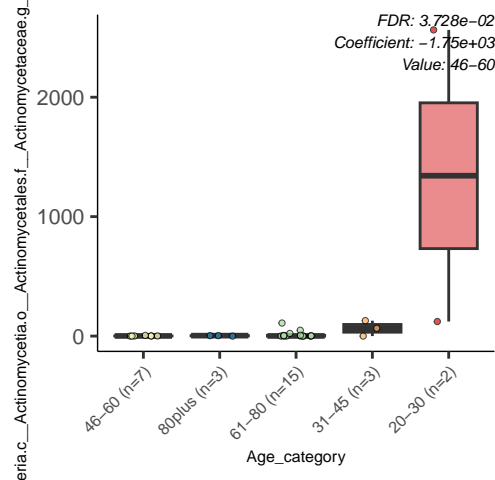

p\_\_Proteobacteria.c\_\_Gammaproteobacteria.o\_\_Alteromonadales.f

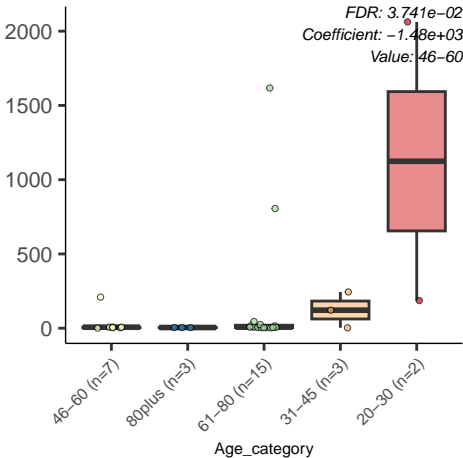

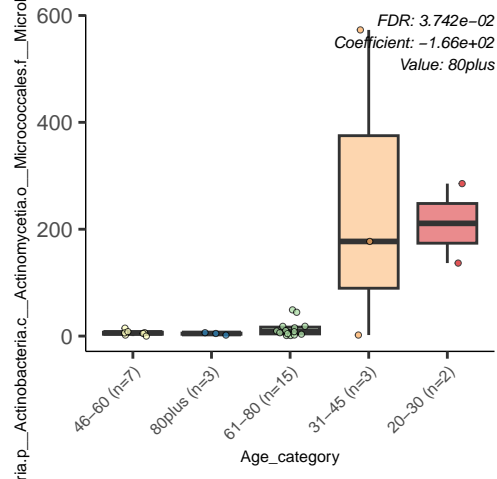

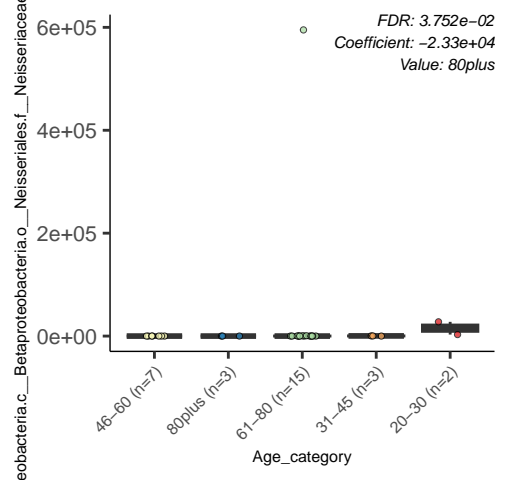

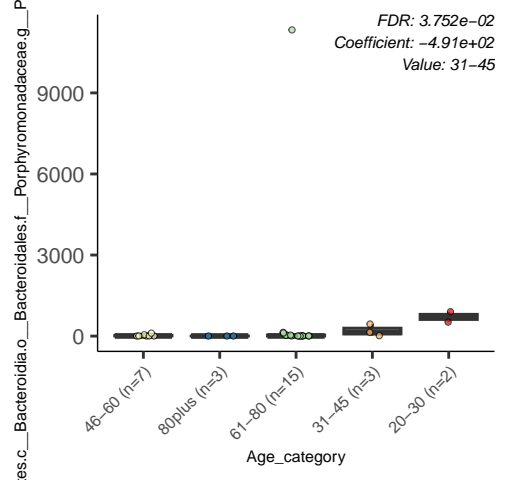



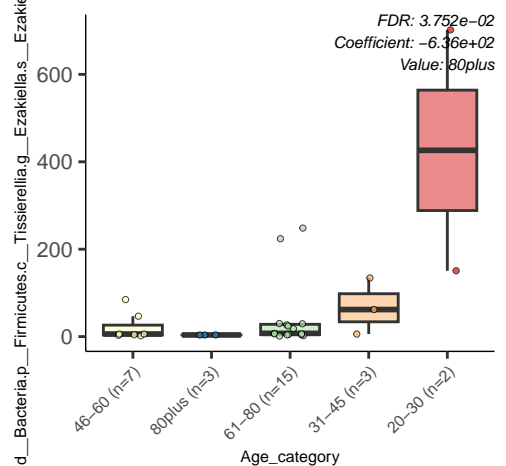

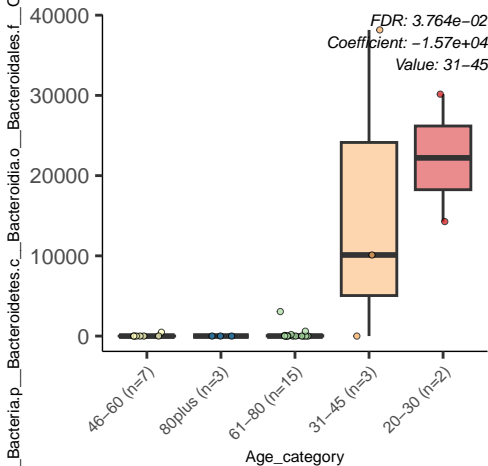

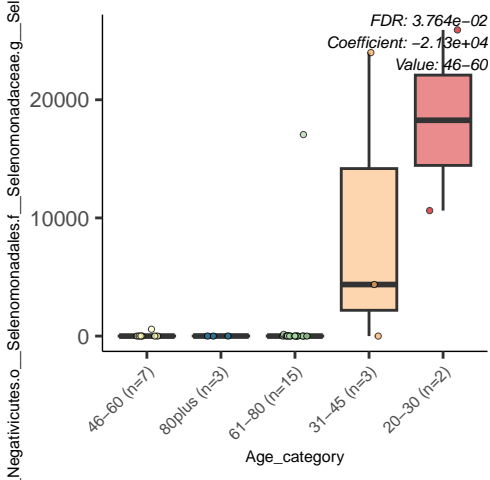

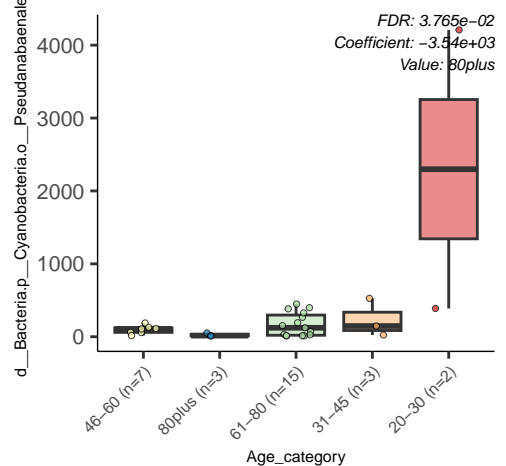

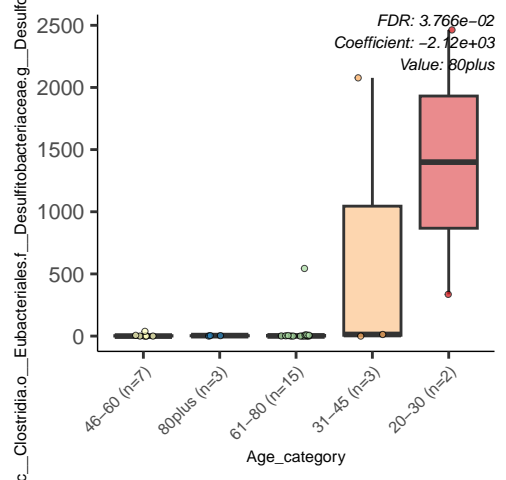

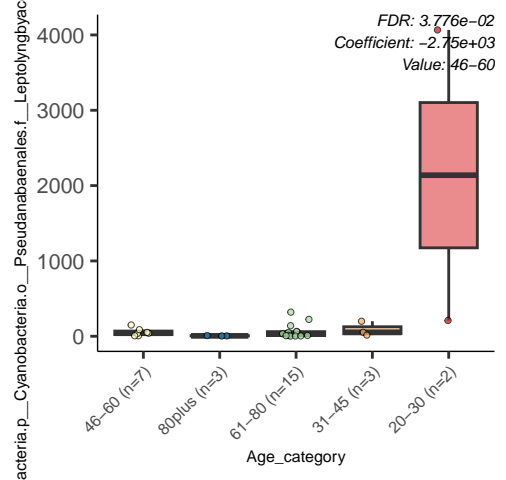

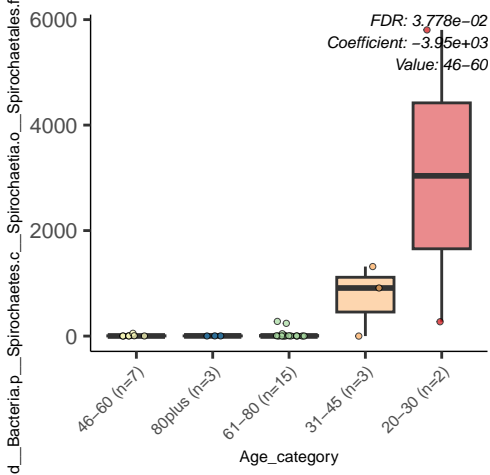

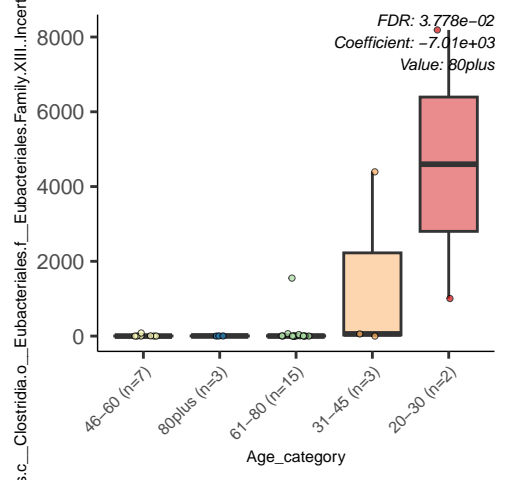



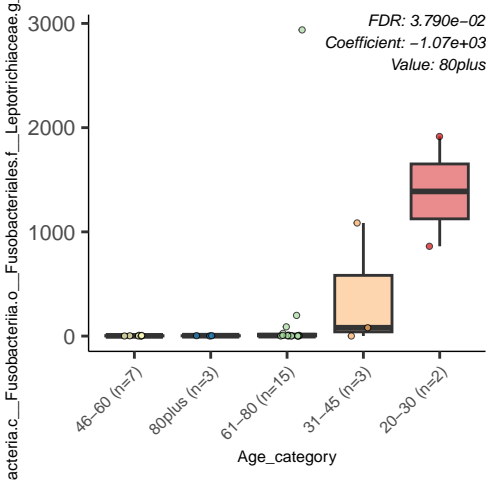

ia.p\_\_Tenericutes.c\_\_Mollicutes.o\_\_Mycoplasmatales.f\_\_Mycoplasm

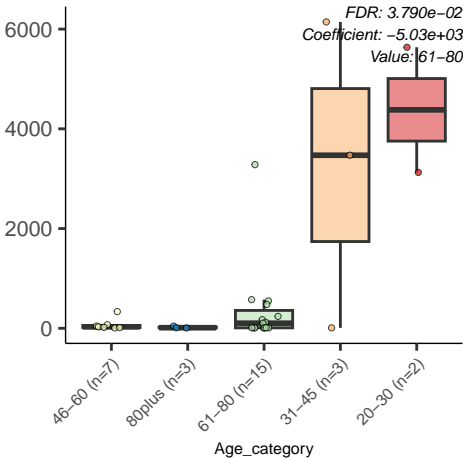

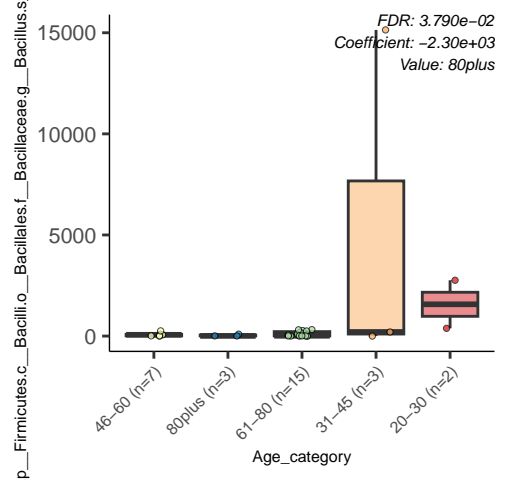

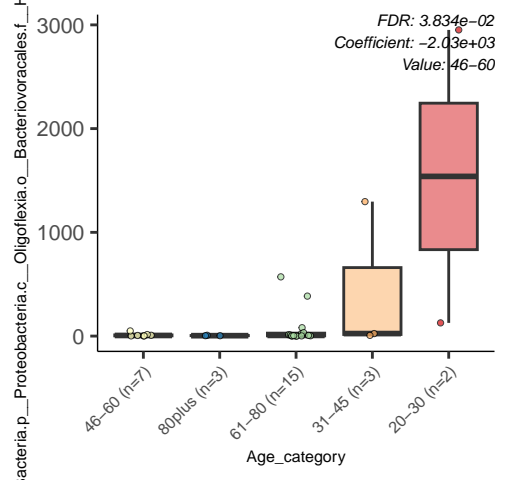

Proteobacteria.c\_\_Oligoflexia.o\_\_Bacteriovoracales.f\_\_Halobacteri

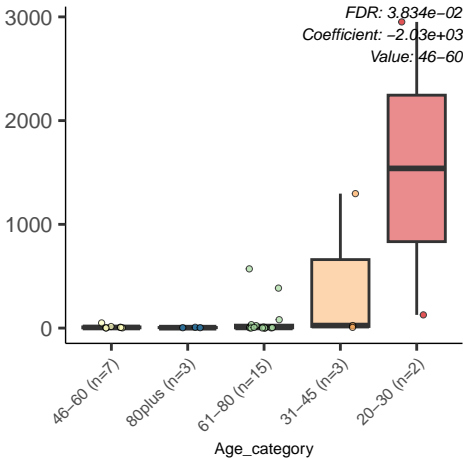

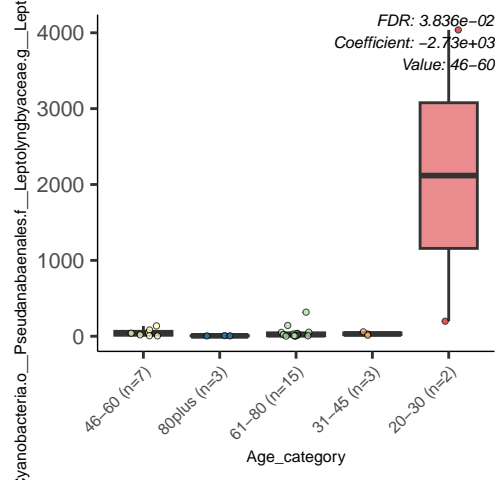

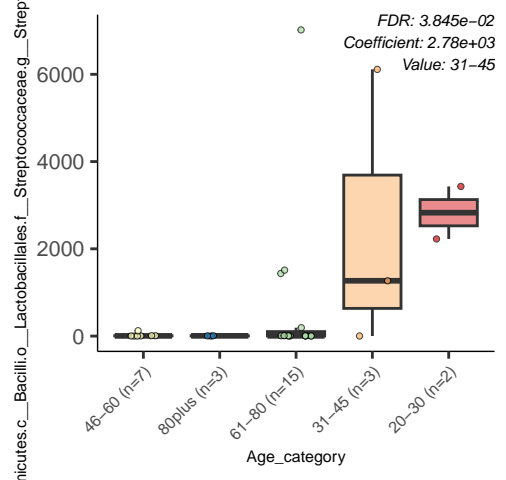

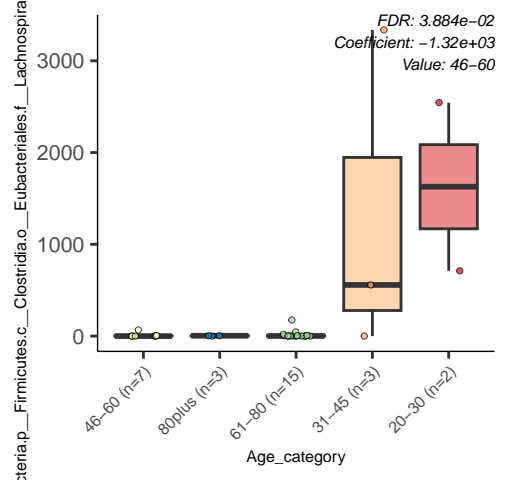



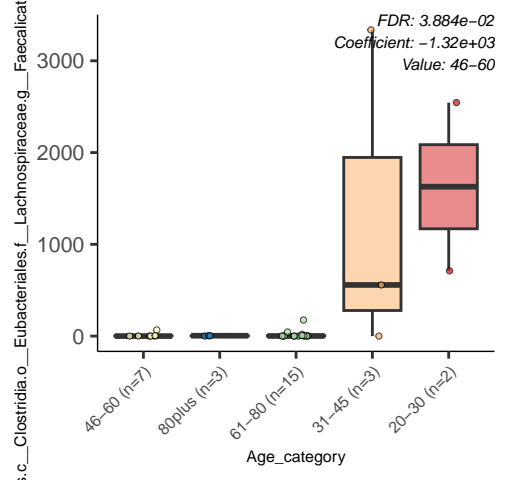

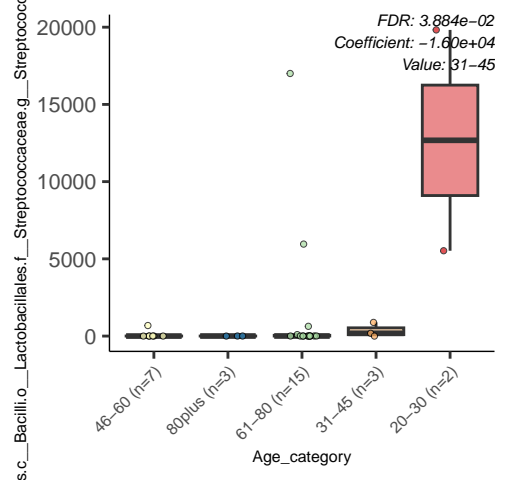

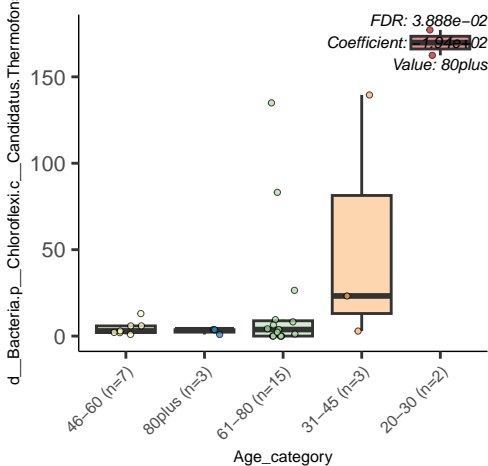

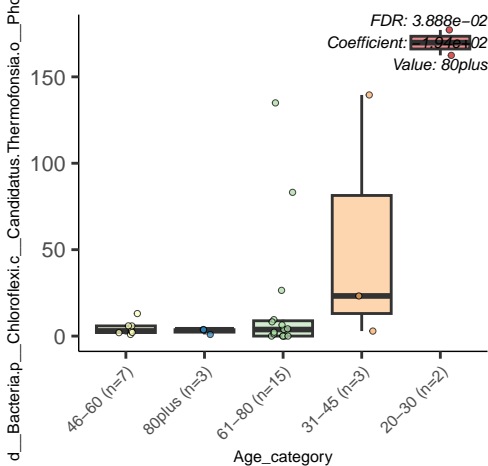

eria.p\_\_Chloroflexi.c\_\_Candidatus.Thermofonsia.o\_\_Phototrophical

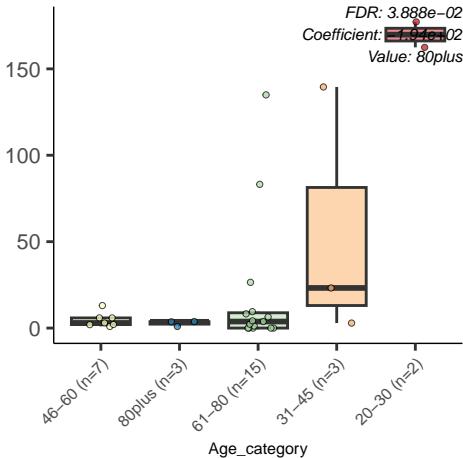

Chloroflexi.c\_\_Candidatus.Thermofonsia.o\_\_Phototrophicales.f\_\_Pho

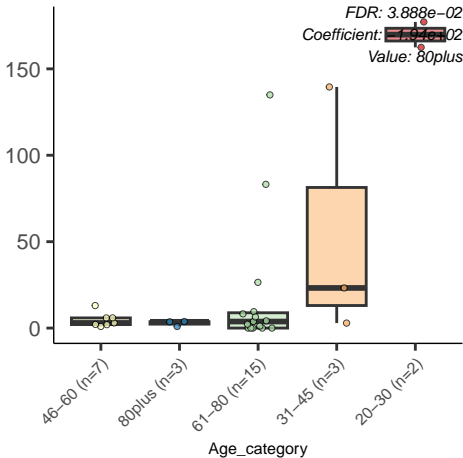

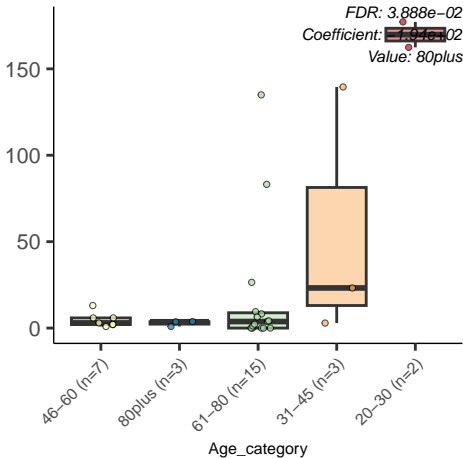

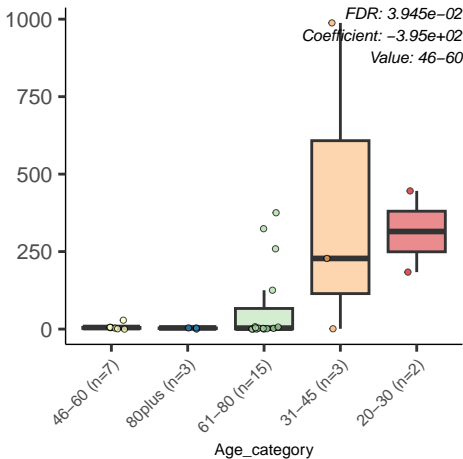



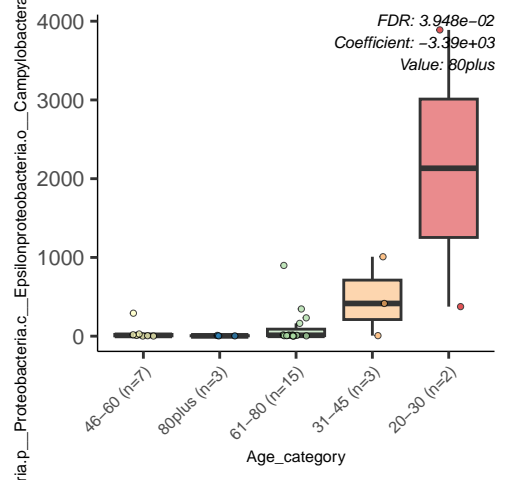

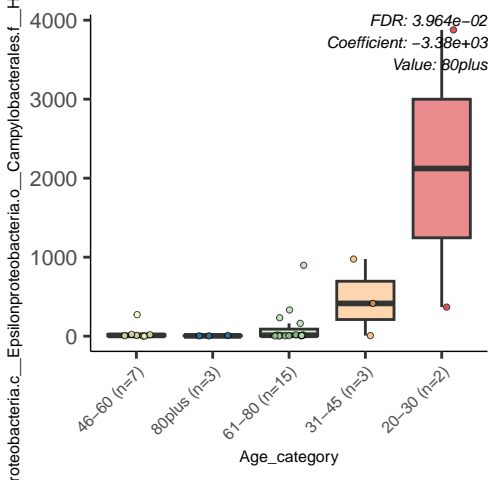

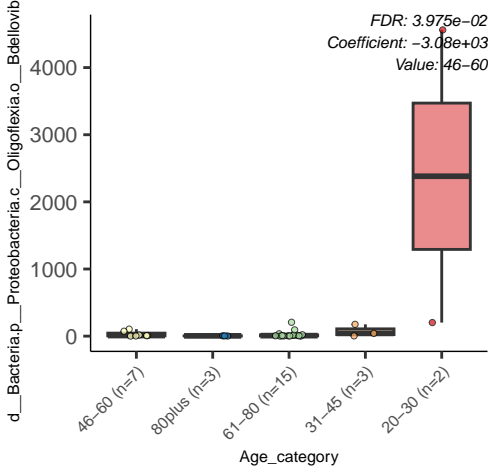

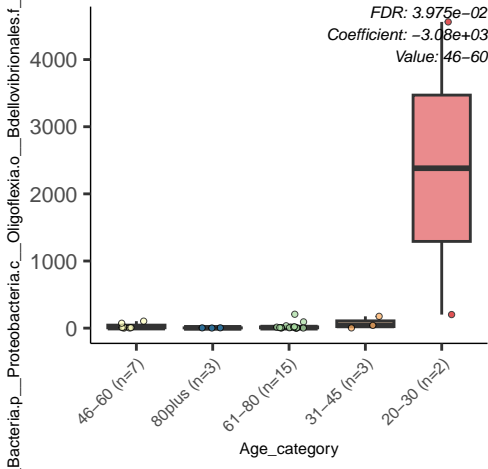

psilonproteobacteria.o\_\_Campylobacterales.f\_\_Campylobacteraceae

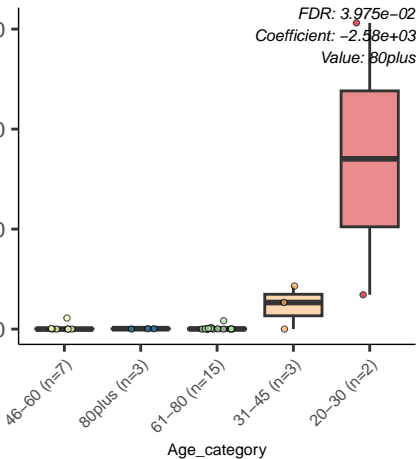

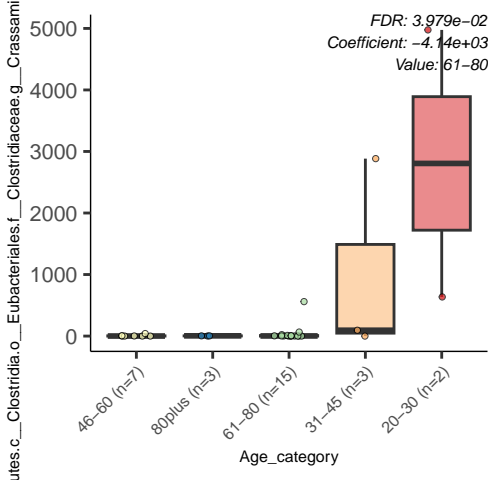

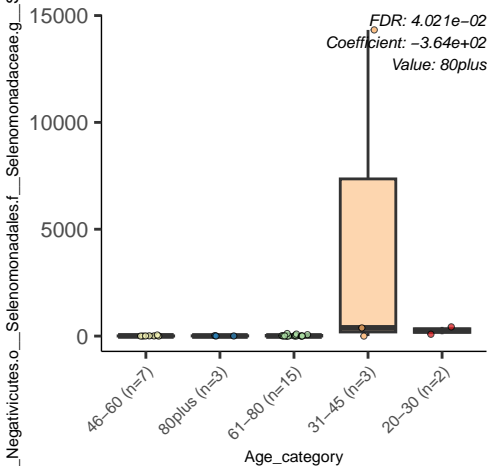

a.p\_\_Proteobacteria.c\_\_Oligoflexia.o\_\_Bdellovibrionales.f\_\_Bdellov

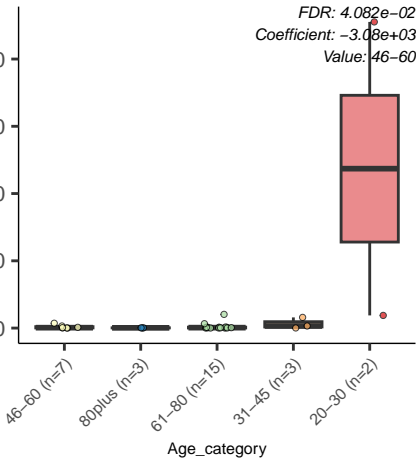



d\_Bacteria.p\_Cyanobacteria

FDR:  $4.157e-02$   
Coefficient:  $-2.02e+04$   
Value: 80plus

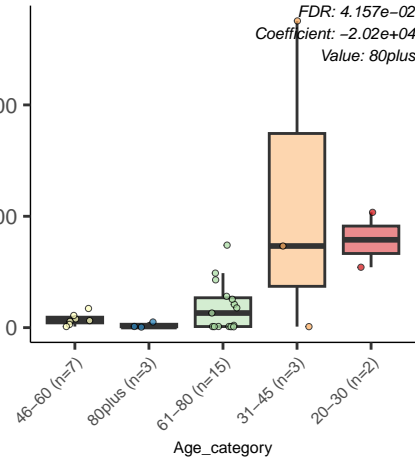

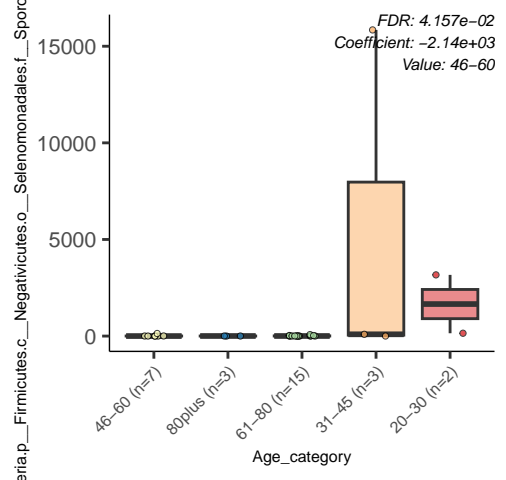

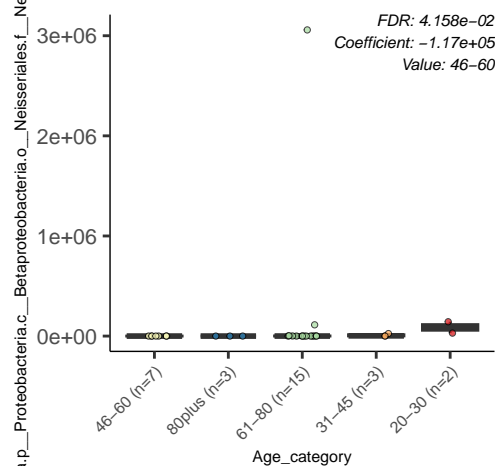

monadia.o\_\_Candidatus.Nanosynbacterales.f\_\_Candidatus.Nanosyn

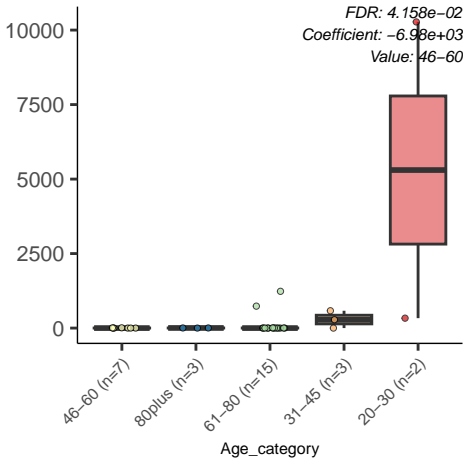

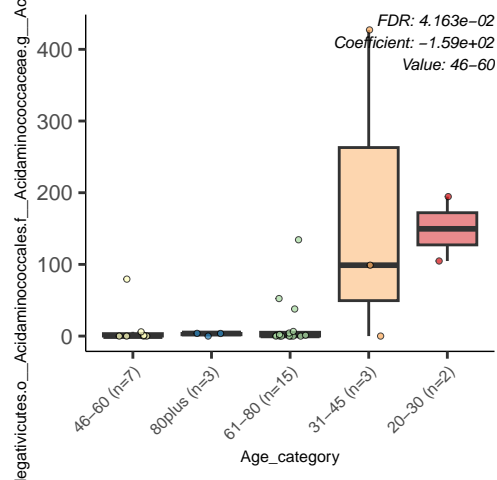

bacteria.c\_\_Betaproteobacteria.o\_\_Neisseriales.f\_\_Neisseriaceae.g

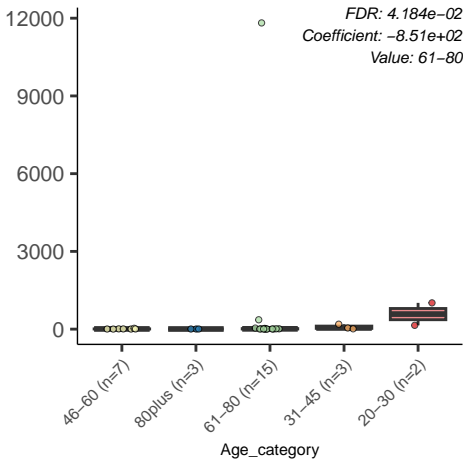

c\_\_Clostridia.o\_\_Eubacteriales.f\_\_Eubacteriales.Family.XIII..Incerta

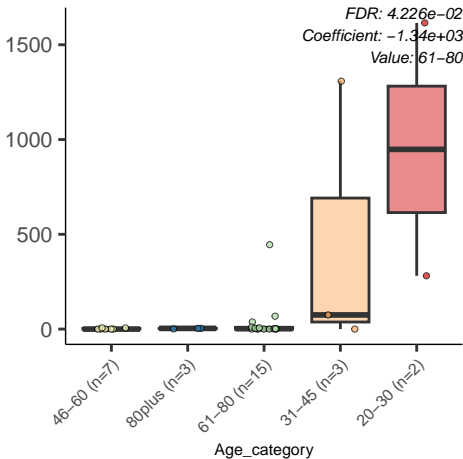

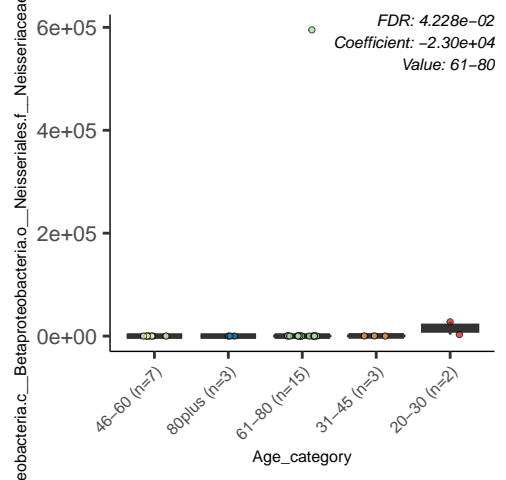



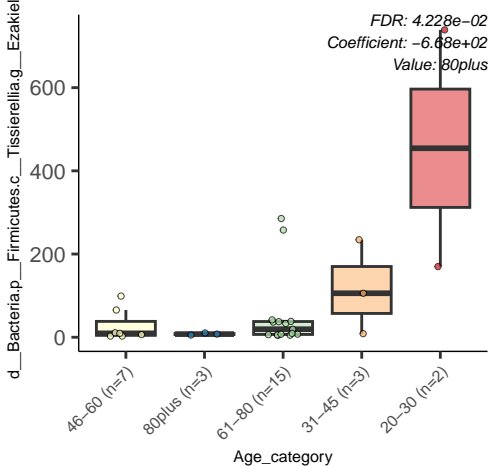

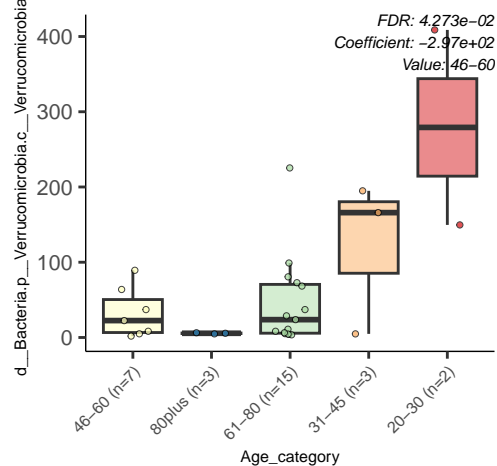

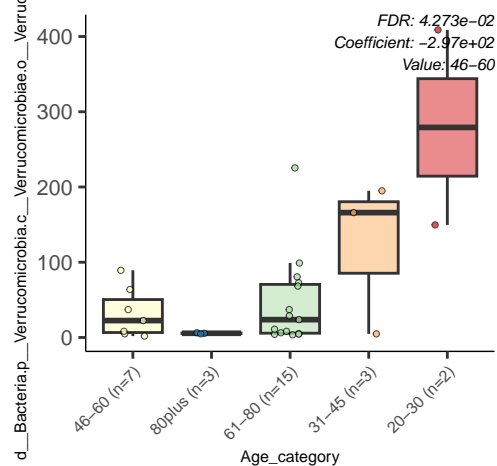

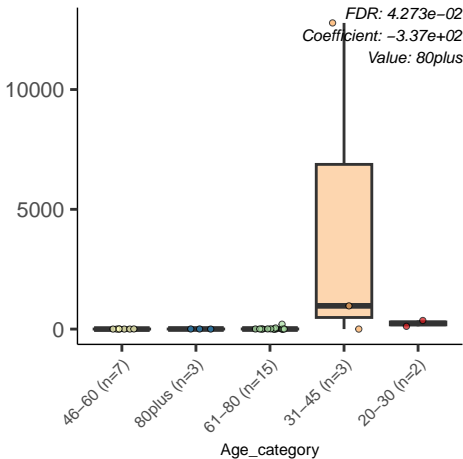

d\_\_Bacteria.p\_\_Deinococcus.Thermus

FDR:  $4.301e-02$   
Coefficient:  $-1.64e+03$   
Value: 80plus

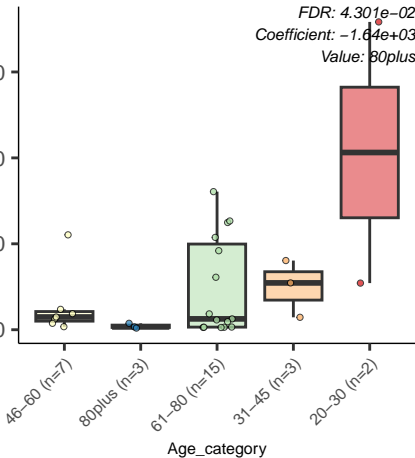

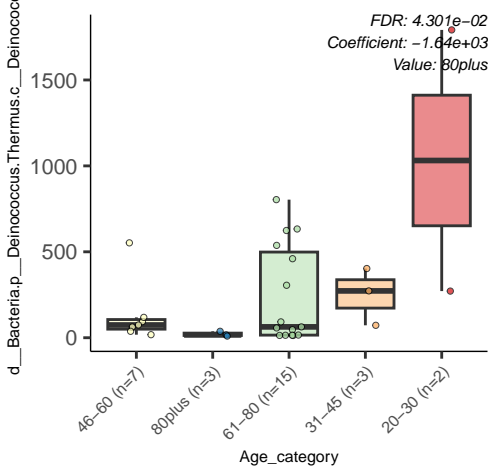

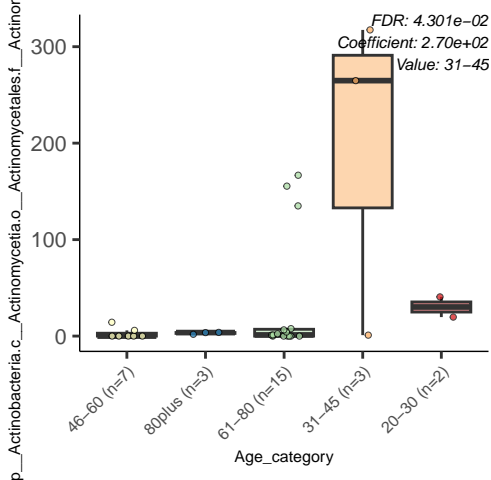

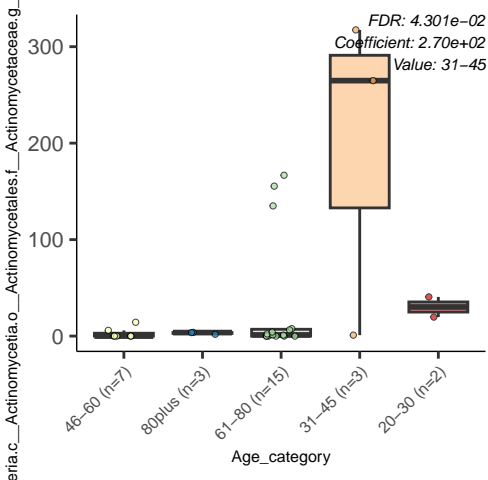



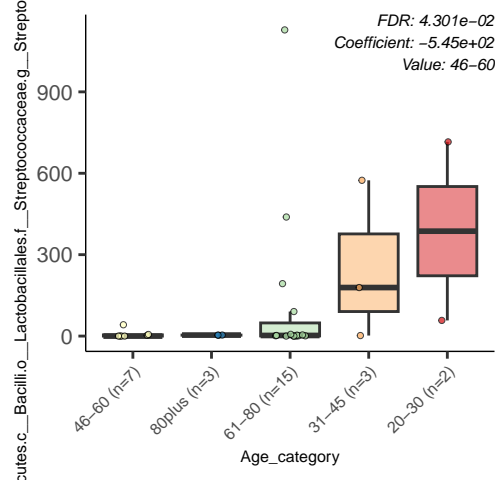

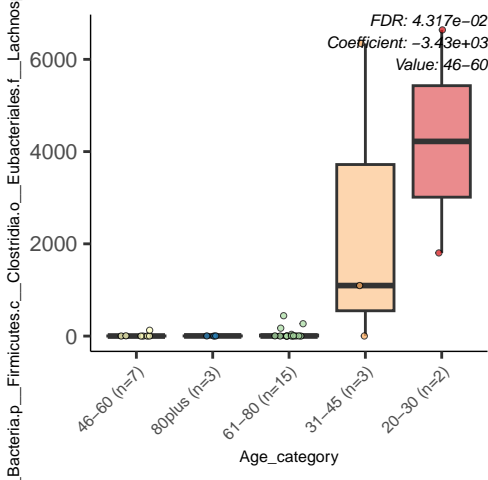

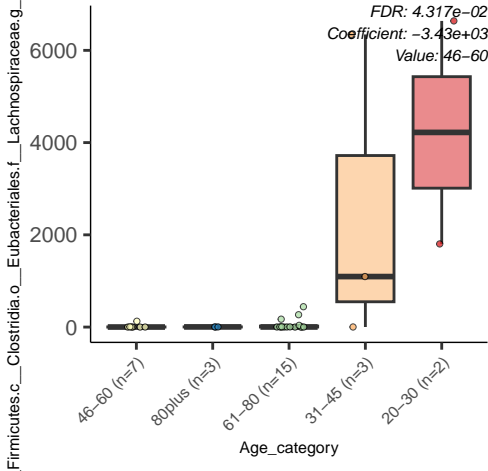

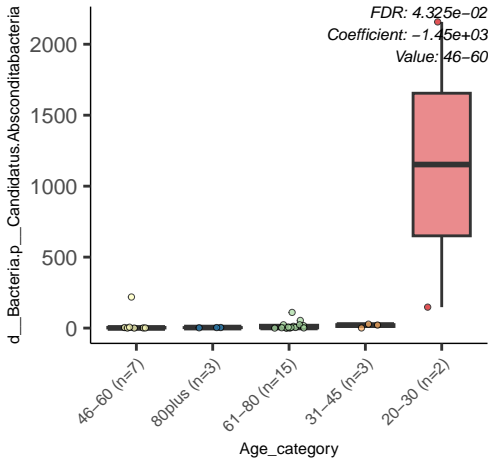

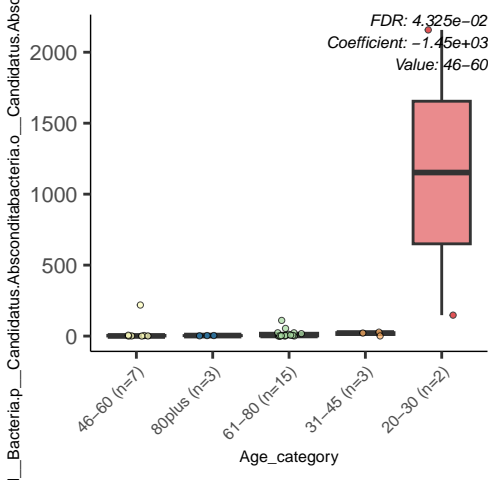

ndidatus.Absconditabacteria.o\_\_Candidatus.Absconditabacterales.f.

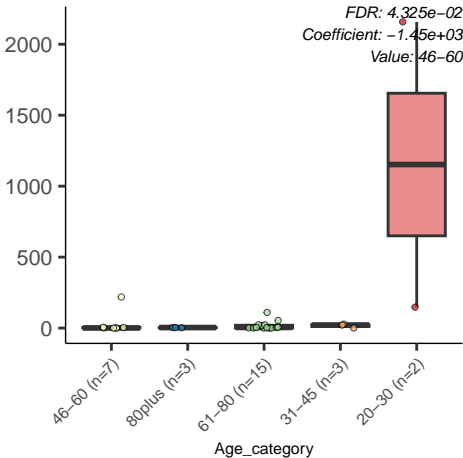

ditabacteria.o\_\_Candidatus.Absconditabacterales.f\_\_Candidatus.Ab

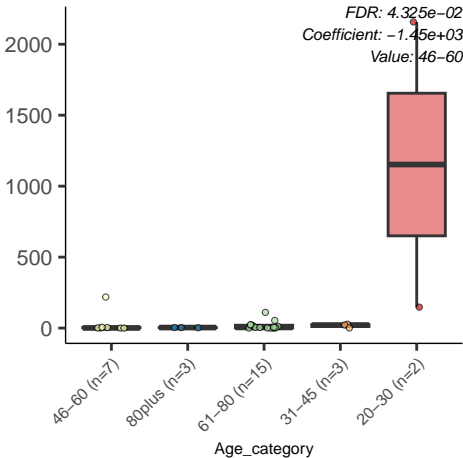

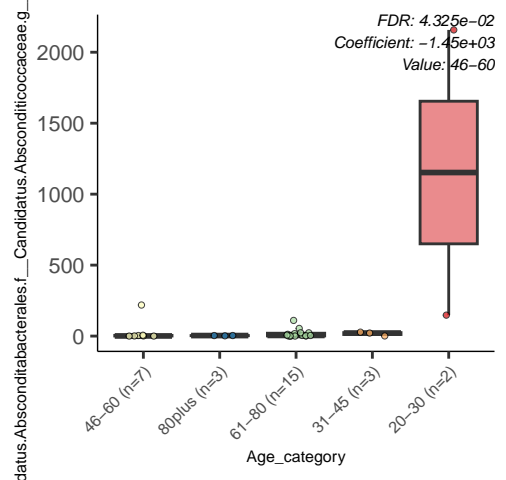



psilonproteobacteria.o\_\_Campylobacterales.f\_\_Campylobacteraceae

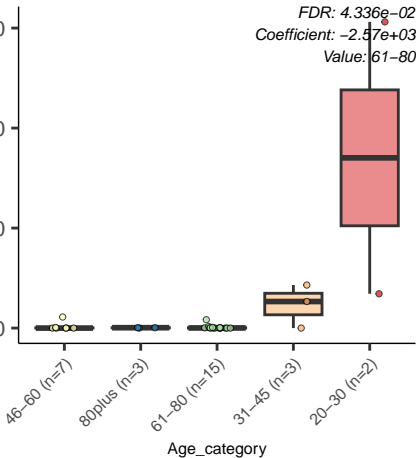

eria.p\_\_Bacteroidetes.c\_\_Cytophagia.o\_\_Cytophagales.f\_\_Fulviving

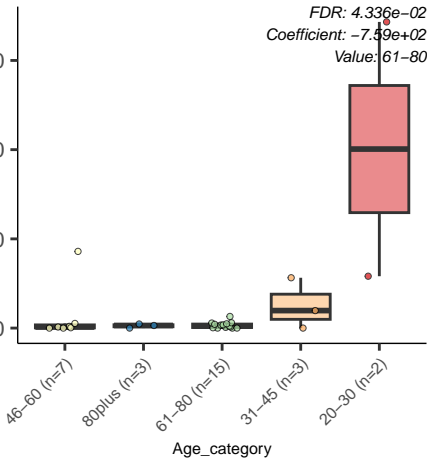

cteroideetes.c\_\_Cytophagia.o\_\_Cytophagales.f\_\_Fulvivirgaceae.g

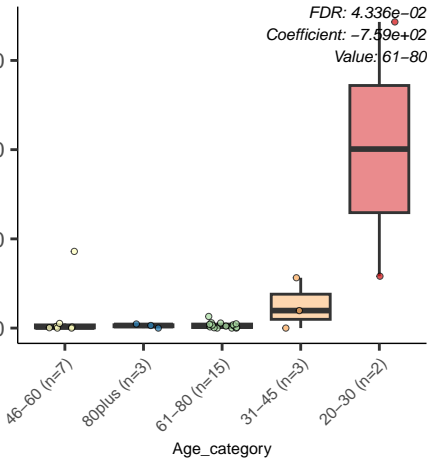

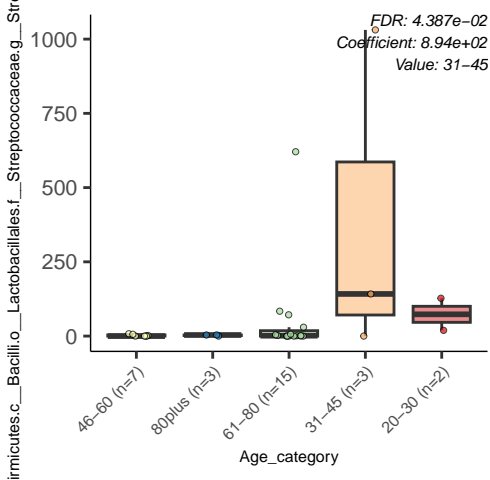

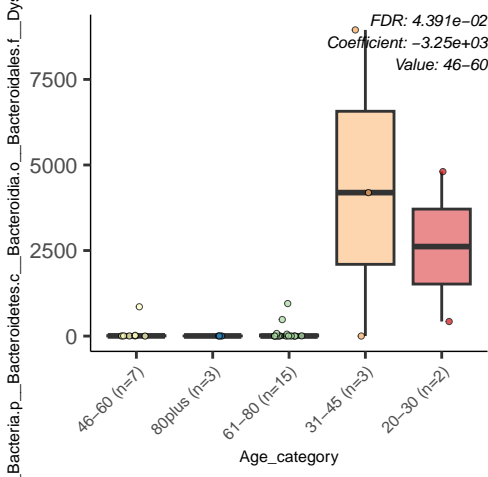

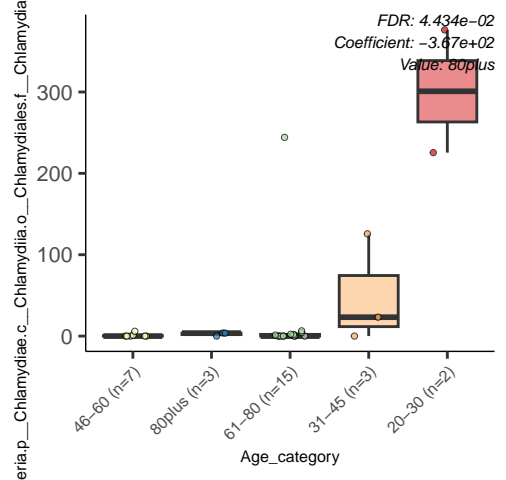

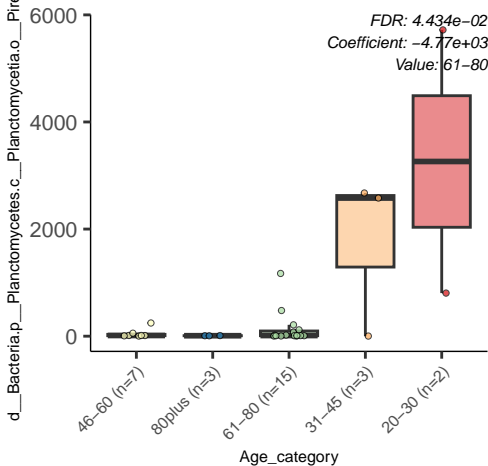

d\_\_Bacteria.p\_\_Proteobacteria.c\_\_Alphaproteobacteria.o\_\_H

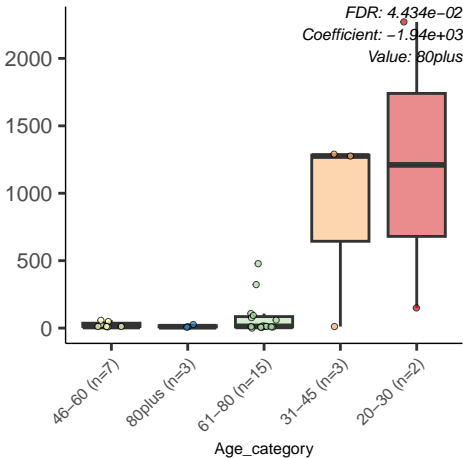



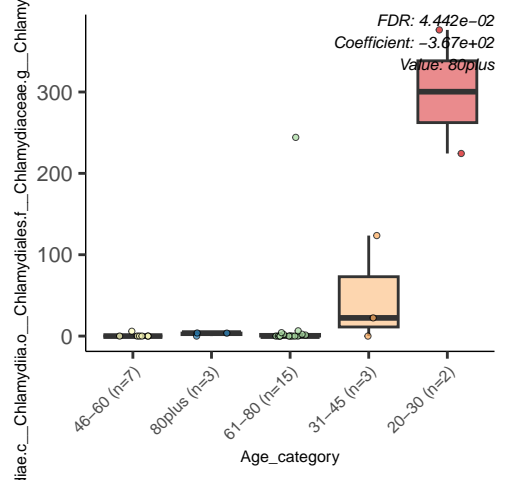

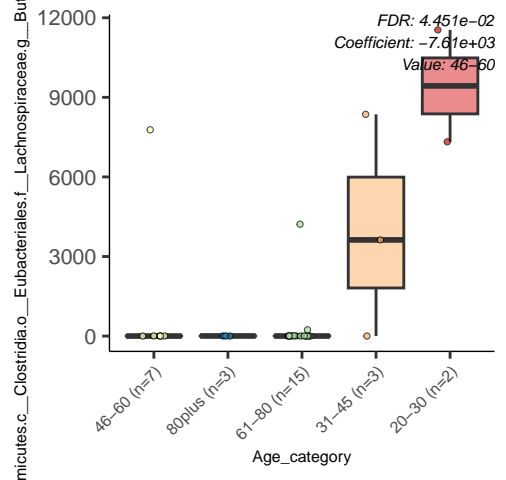

bacteroidetes.c\_\_Bacteroidia.o\_\_Bacteroidales.f\_\_Prevotellaceae.g

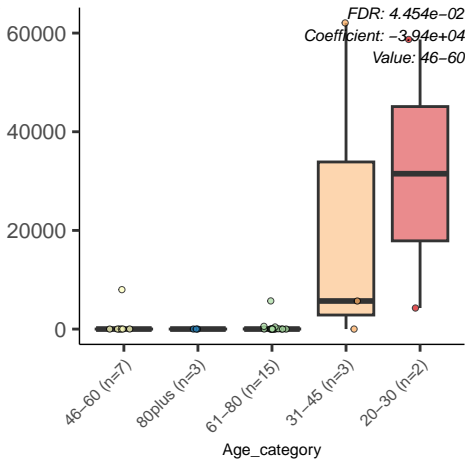

eria.p\_\_Bacteroidetes.c\_\_Cytophagia.o\_\_Cytophagales.f\_\_Fulviving

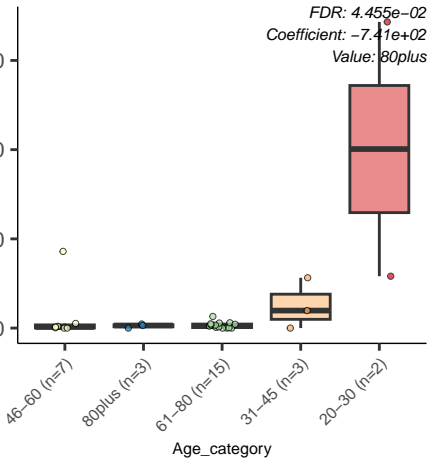

cteroidetes.c\_\_Cytophagia.o\_\_Cytophagales.f\_\_Fulvivirgaceae.g

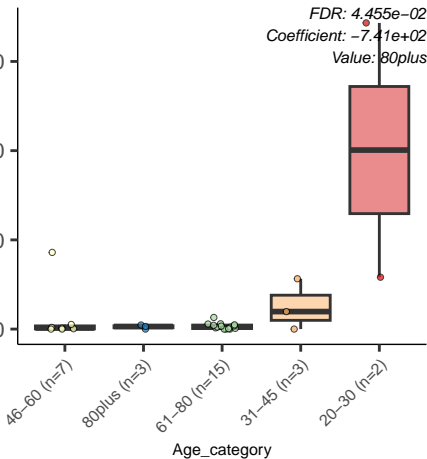

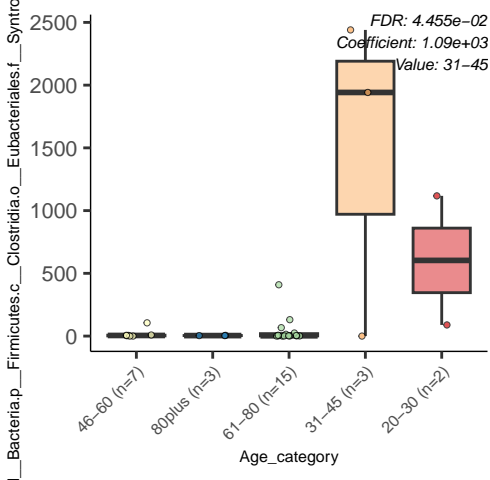

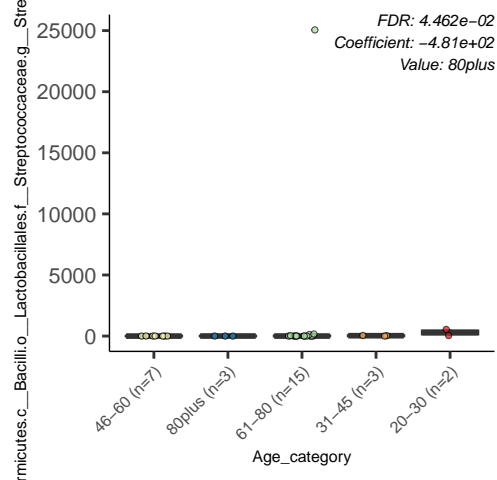

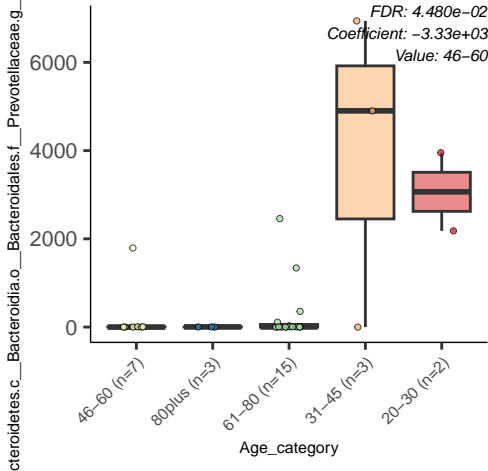



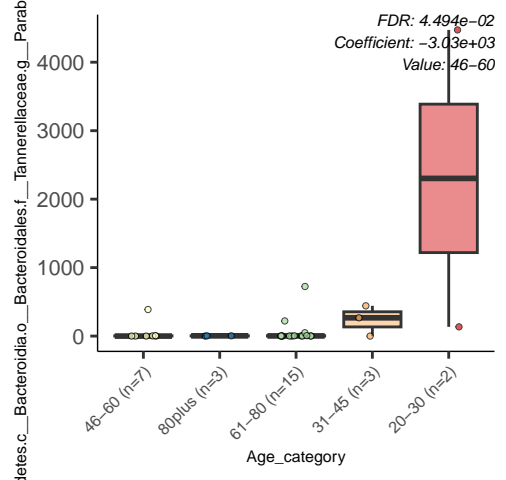

bacteria.c\_\_Fusobacteriia.o\_\_Fusobacteriales.f\_\_Leptotrichiaceae.g

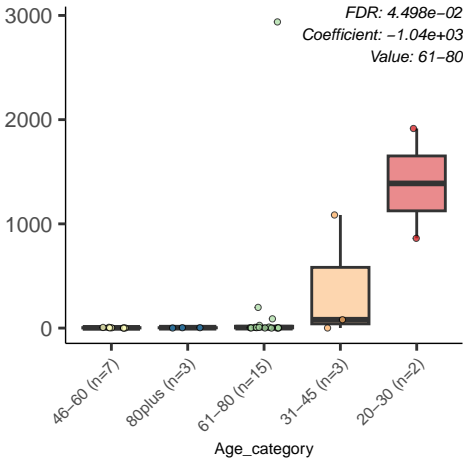

teroidetes.c\_\_Cytophagia.o\_\_Cytophagales.f\_\_Cytophagaceae.g

FDR: 4.498e-02  
Coefficient: -2.00e+02  
Value: 46-60

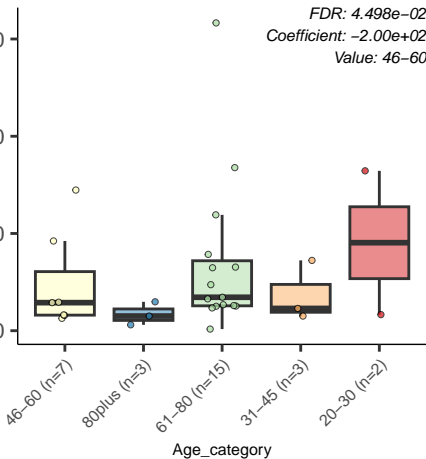

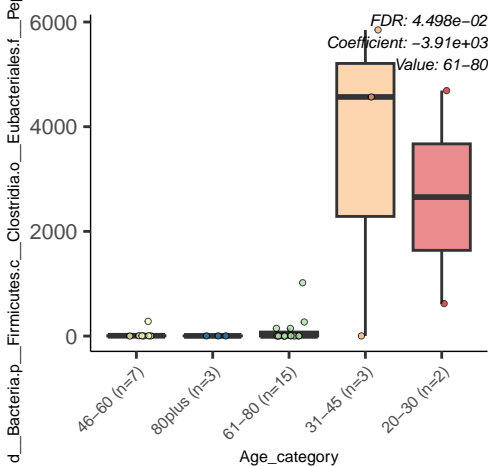

eria.p\_\_Firmicutes.c\_\_Clostridia.o\_\_Eubacteriales.f\_\_Peptococcaceae

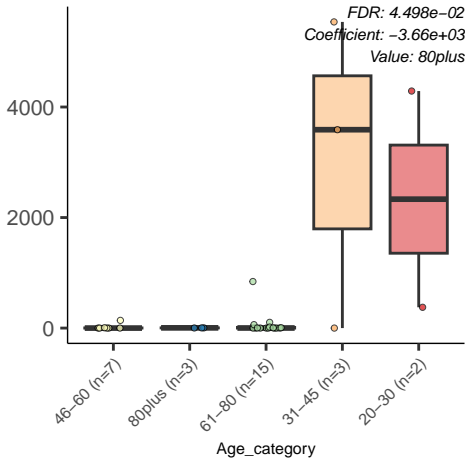

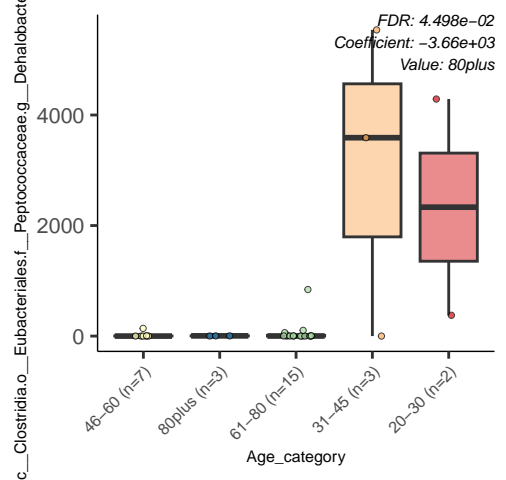

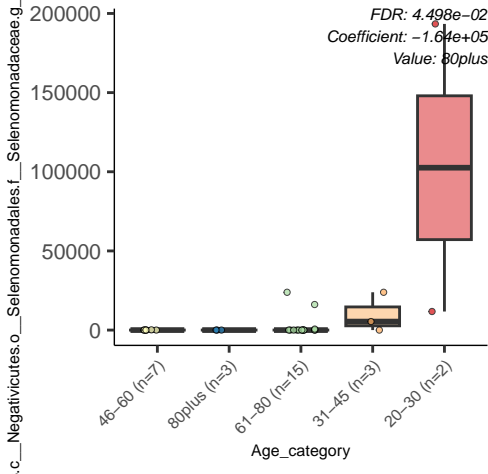

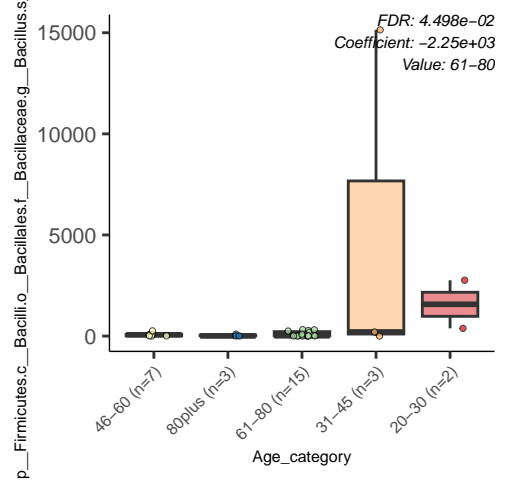



d\_\_Bacteria.p\_\_Planctomycetes.c\_\_Planctomycetia.o\_\_Planct

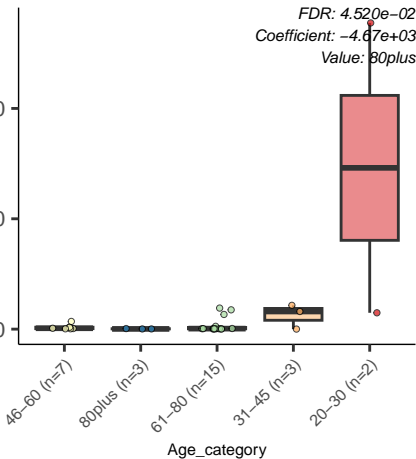

acteria.p\_\_Planctomycetes.c\_\_Planctomycetia.o\_\_Planctomycetales.

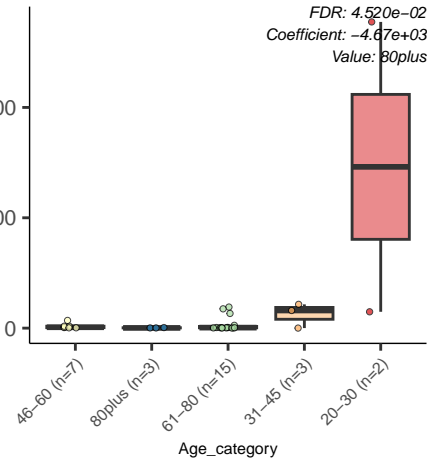

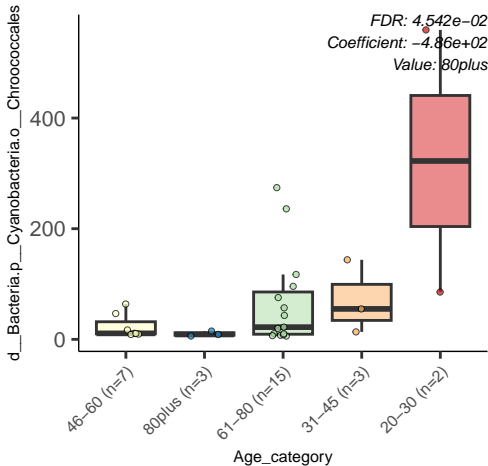

Bacteria.p\_\_Proteobacteria.c\_\_Alphaproteobacteria.o\_\_Holosporales

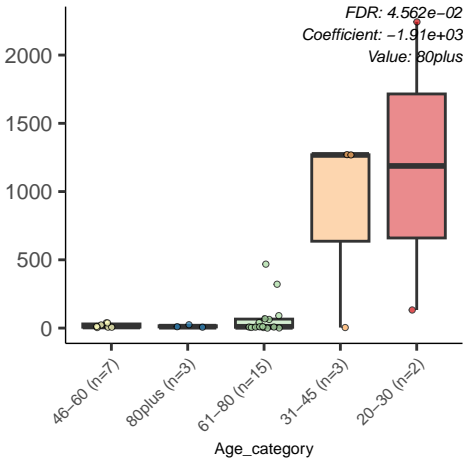

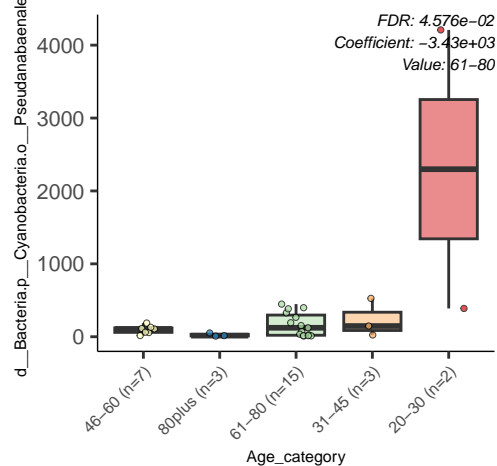

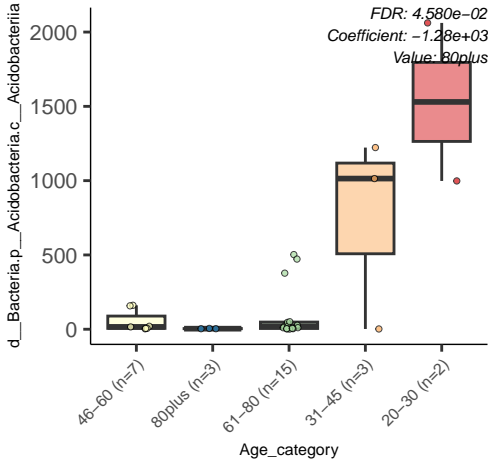

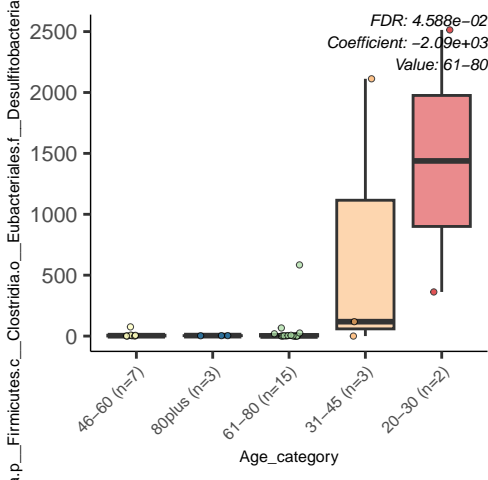

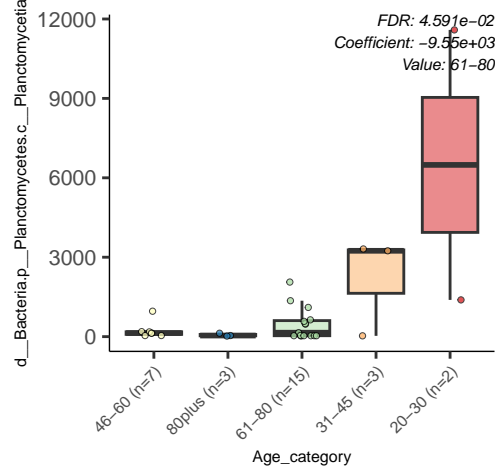



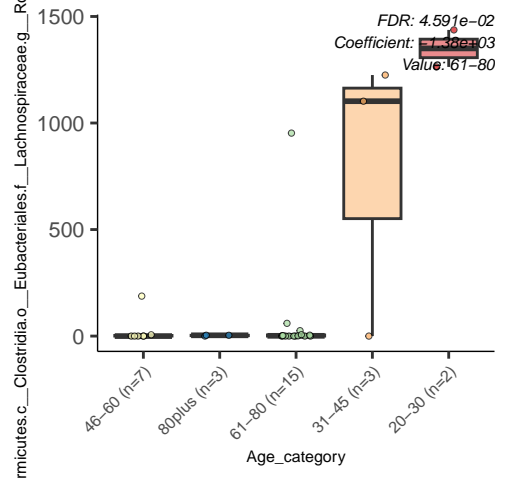

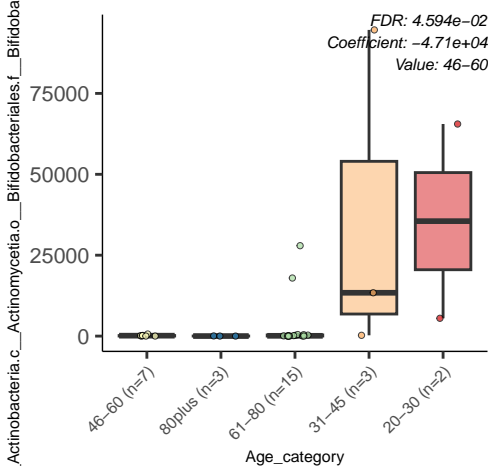

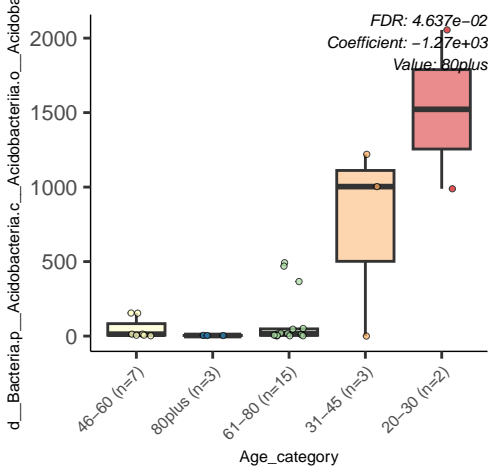

Bacteria.p\_\_Acidobacteria.c\_\_Acidobacteriia.o\_\_Acidobacteriales.f\_\_

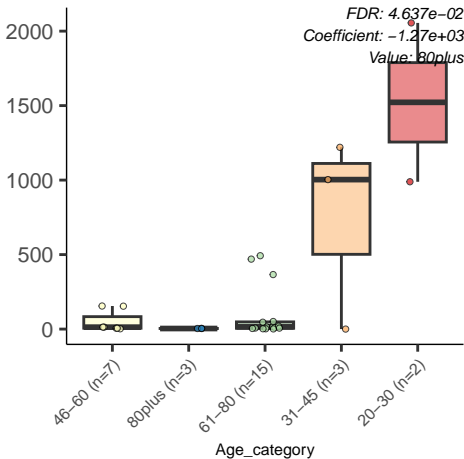

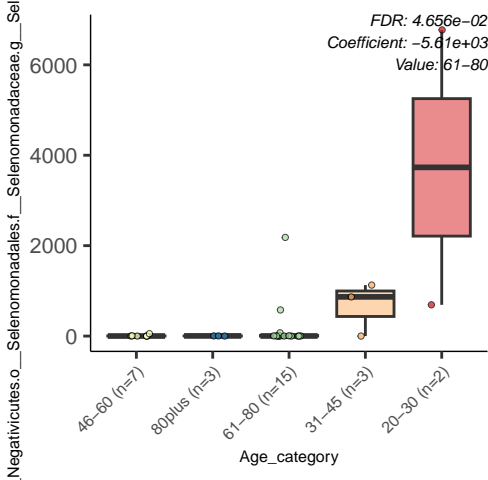

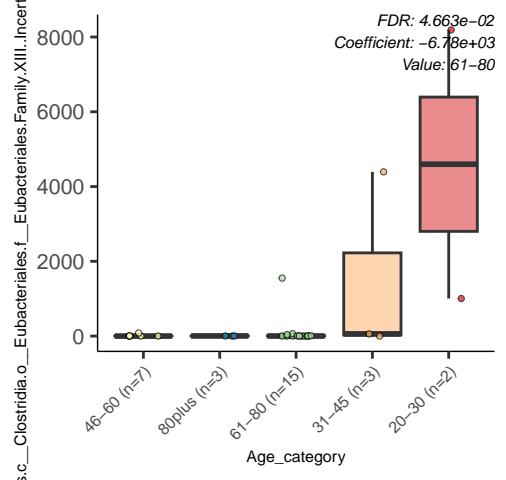

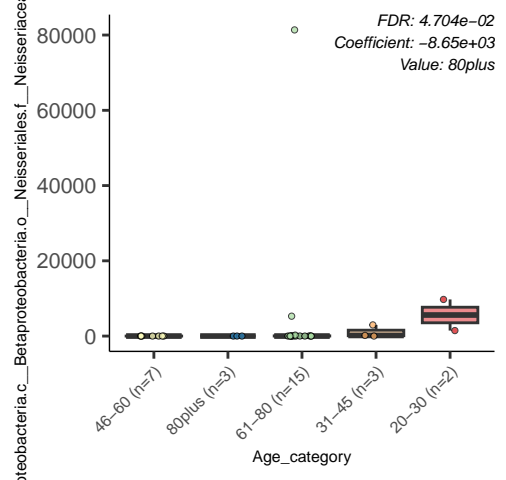

d\_Bacteria.p\_Planctomycetes

FDR:  $4.714e-02$   
Coefficient:  $-9.74e+03$   
Value: 61-80

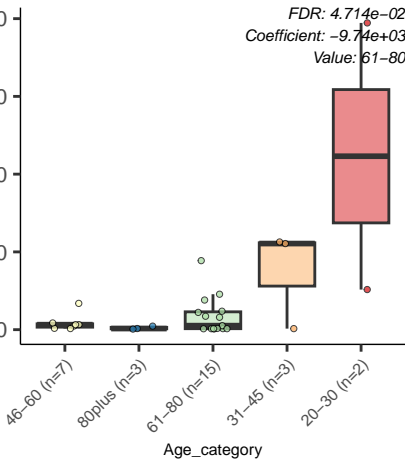



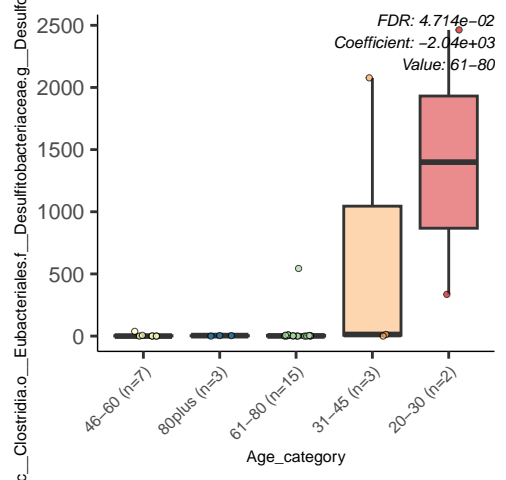

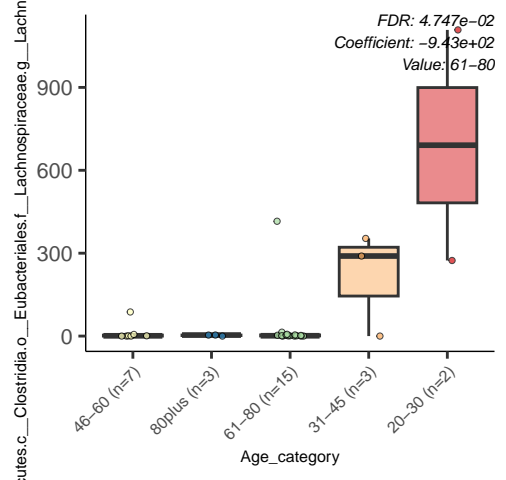

eria.p\_\_Firmicutes.c\_\_Bacilli.o\_\_Bacillales.f\_\_Thermoactinomyceta

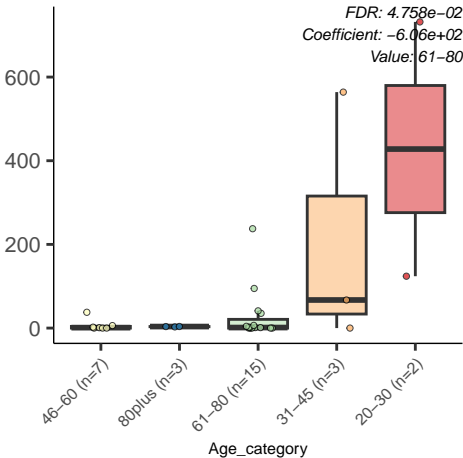

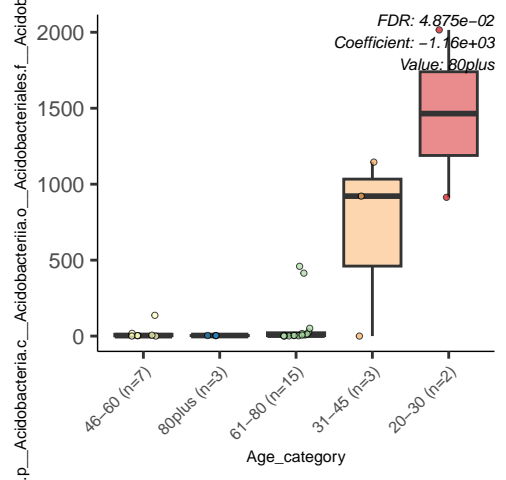

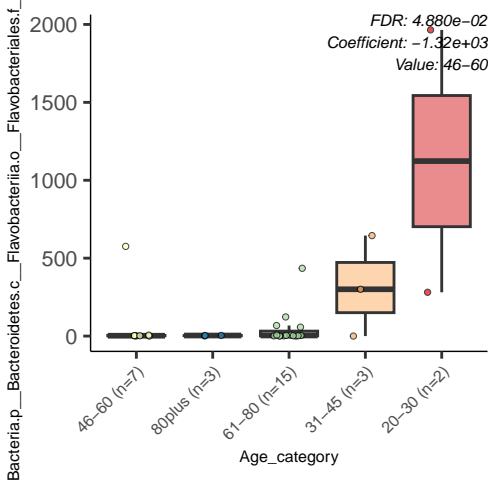

Bacteroidetes.c\_Flavobacteriia.o\_Flavobacteriales.f\_Blattaba

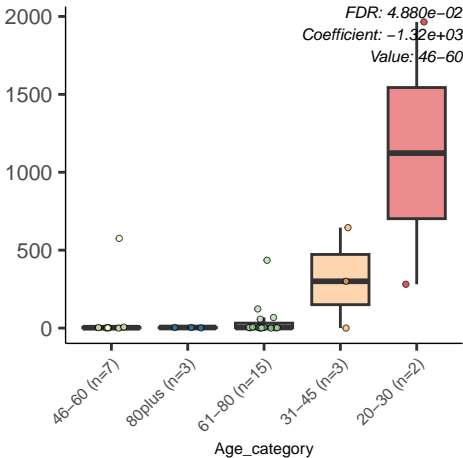

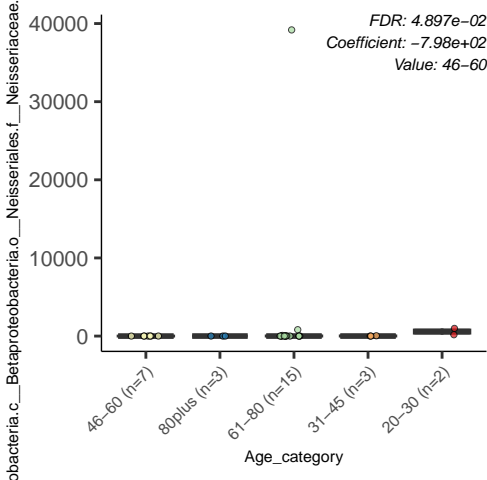

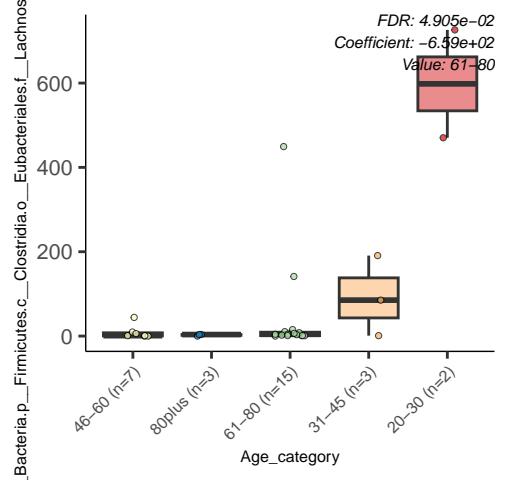



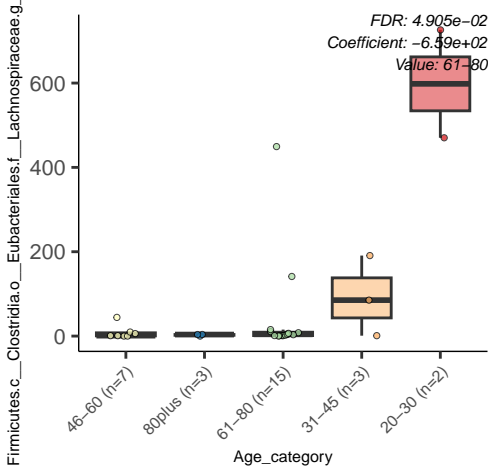

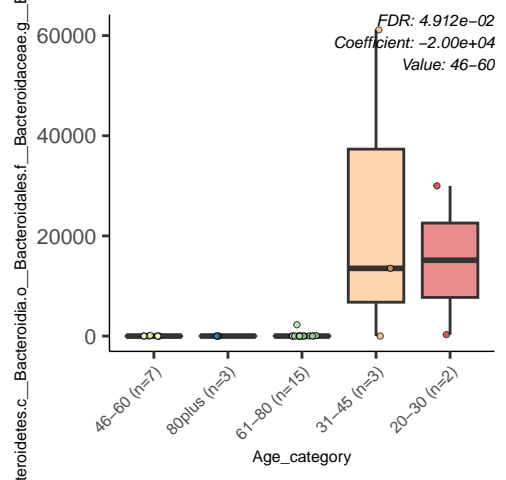

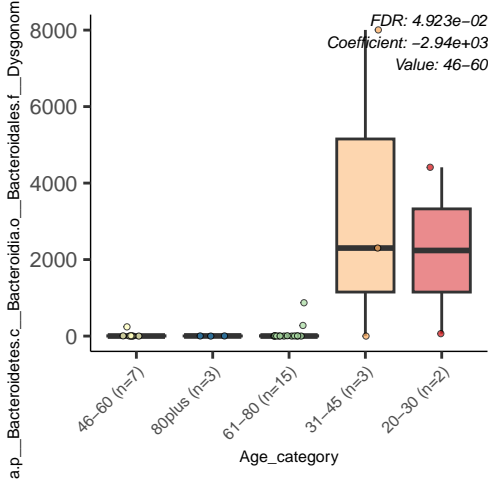

oidetes.c\_\_Bacteroidia.o\_\_Bacteroidales.f\_\_Dysgonomonadaceae.

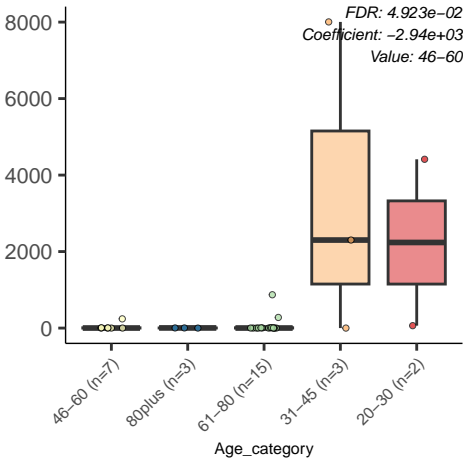

Actinomycetia.o\_\_Corynebacteriales.f\_\_Corynebacteriaceae.g

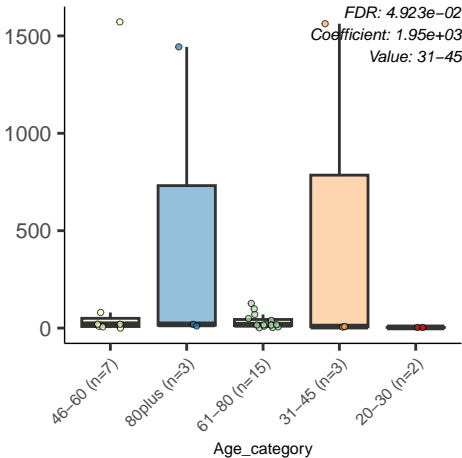

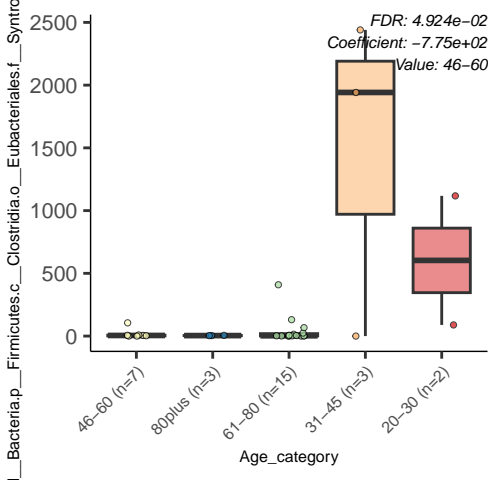

d\_\_Bacteria.p\_\_Nitrospirae.c\_\_Nitrospira

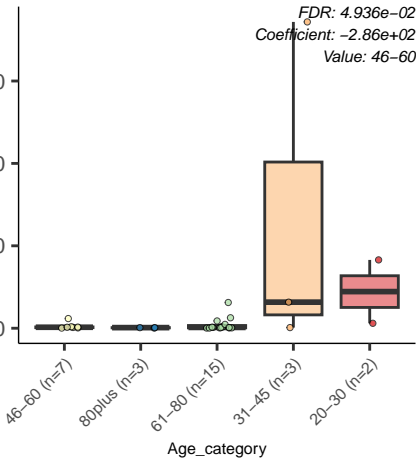

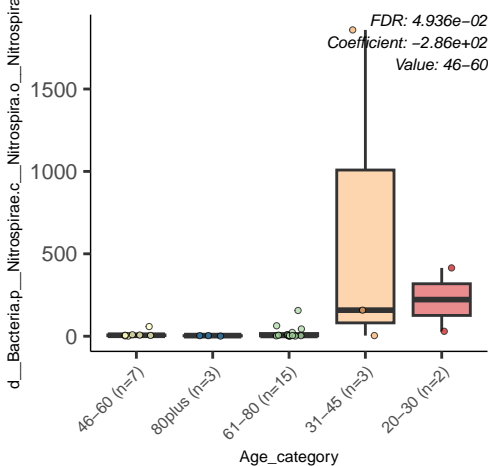



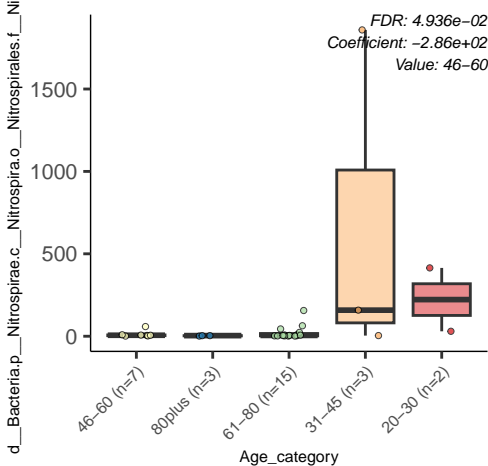

d\_Bacteria.p\_\_Proteobacteria.c\_\_Oligoflexia.o\_\_Bacteriov

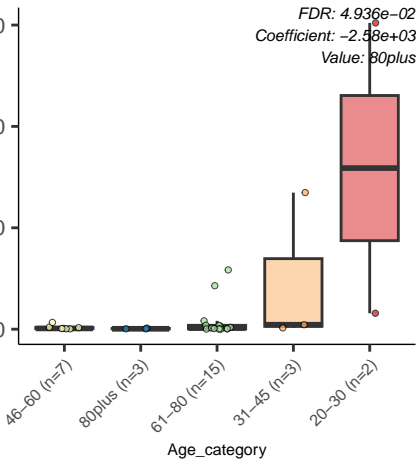

Bacteroidetes.c\_\_Bacteroidia.o\_\_Bacteroidales.f\_\_Prevotellaceae.g

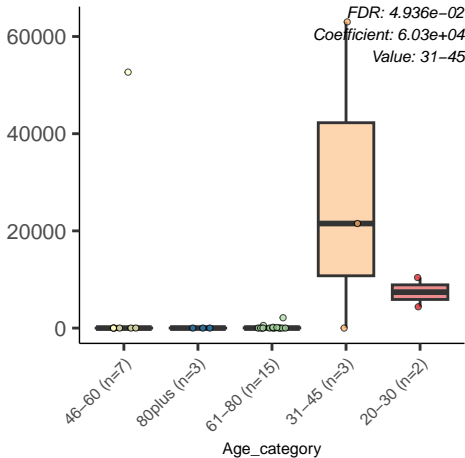

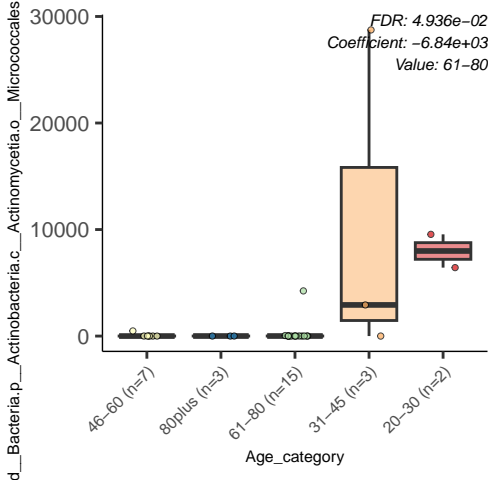

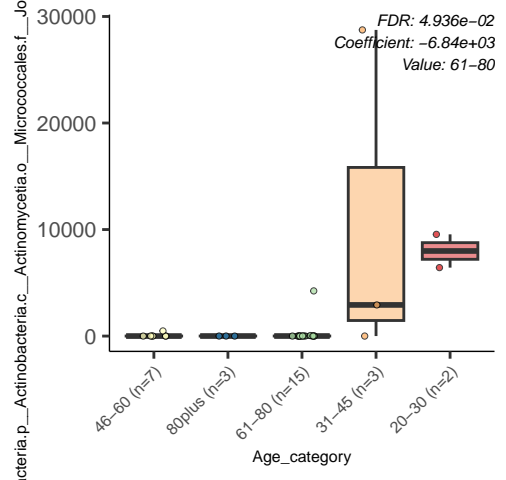

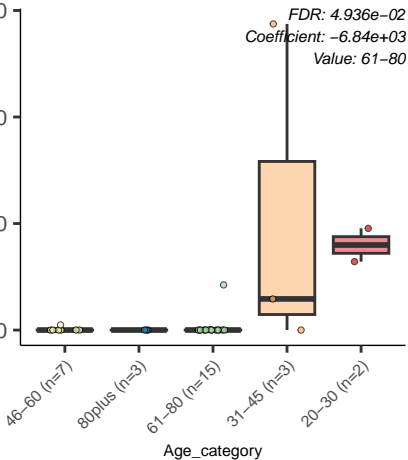

Bacteria.p\_Firmicutes.c\_Bacilli.o\_Lactobacillales.f\_Aerococcaceae

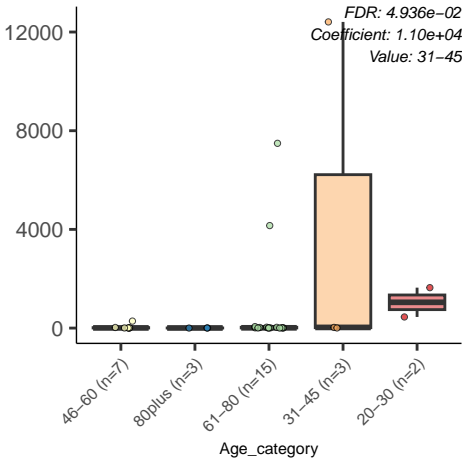

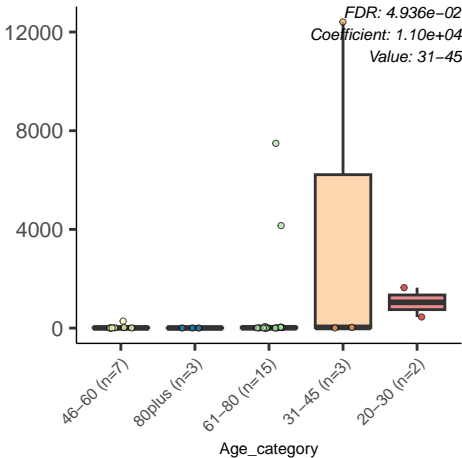



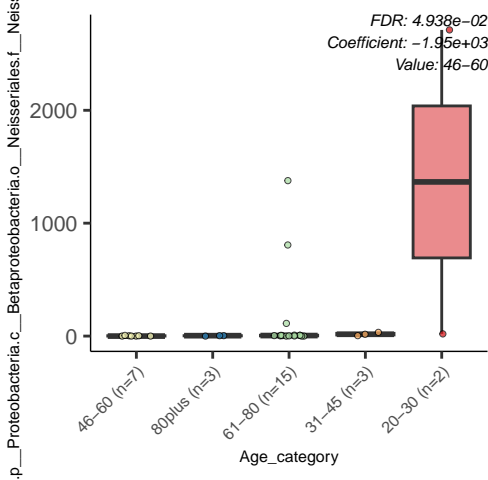

bacteria.c\_\_Betaproteobacteria.o\_\_Neisseriales.f\_\_Neisseriaceae.g

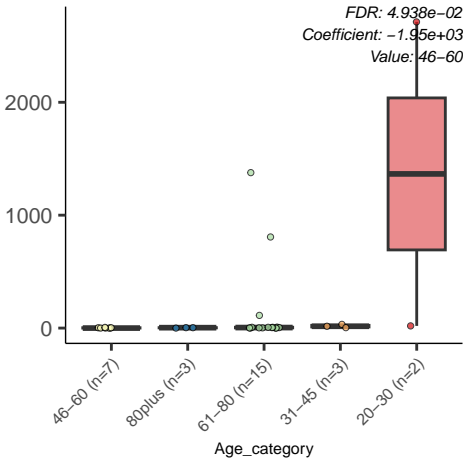

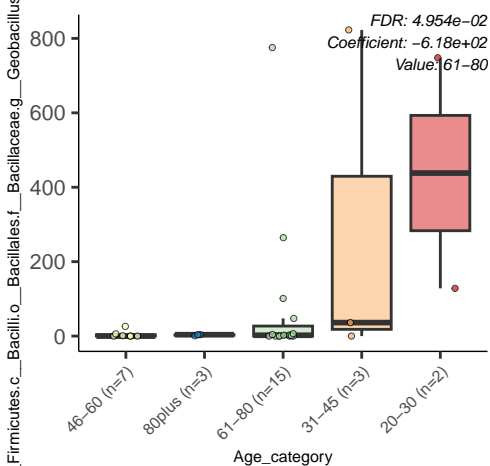

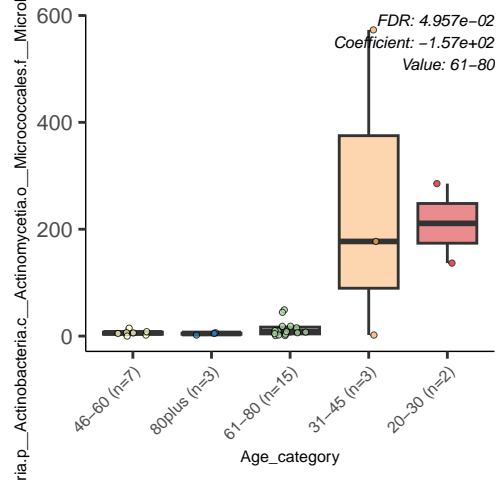

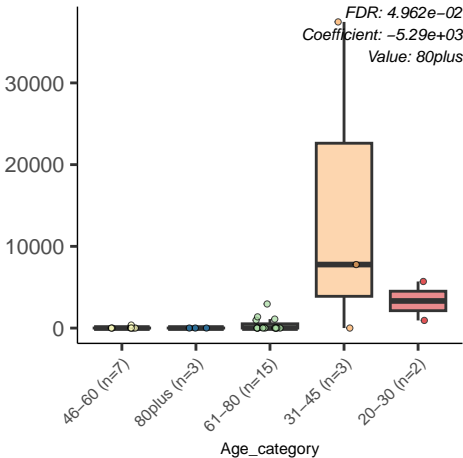

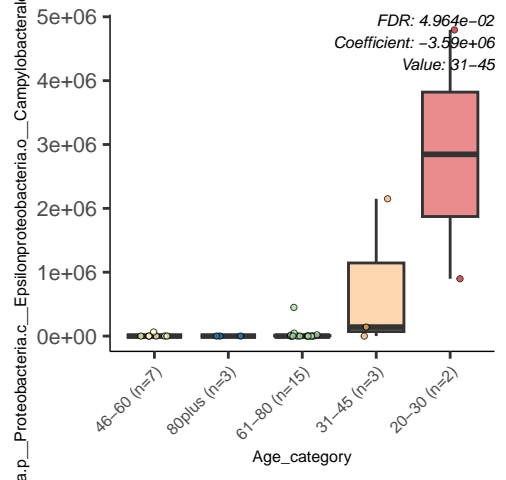

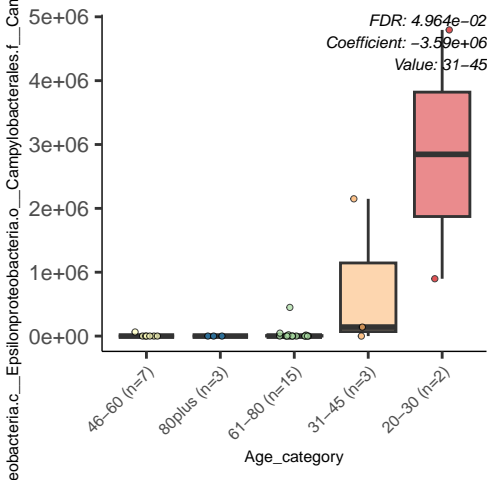

ria.c\_\_Actinomycetia.o\_\_Bifidobacteriales.f\_\_Bifidobacteriaceae.g

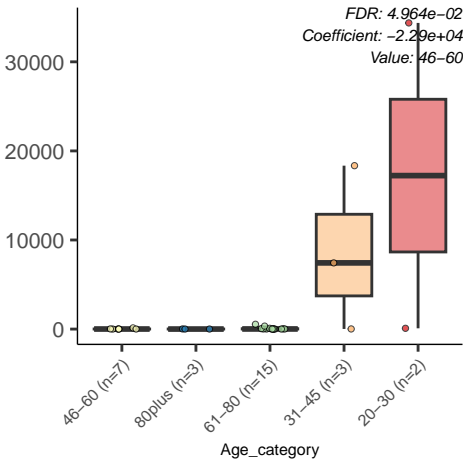



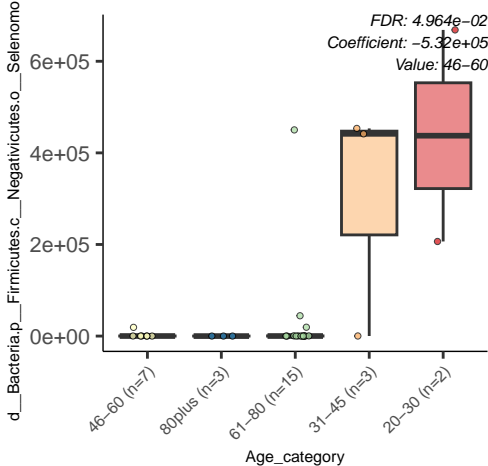

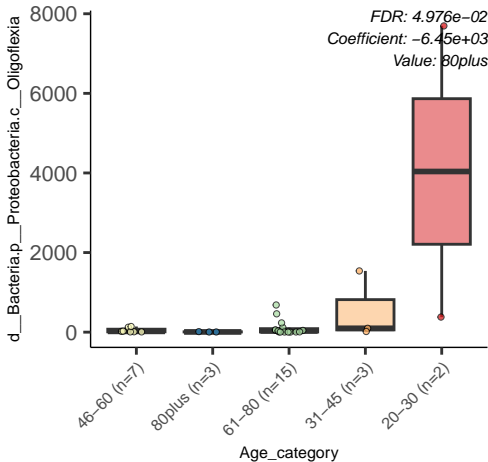

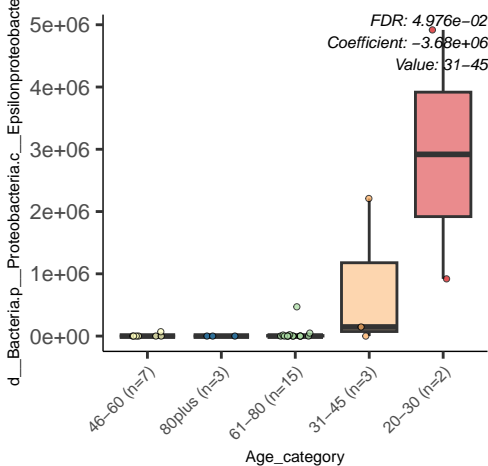

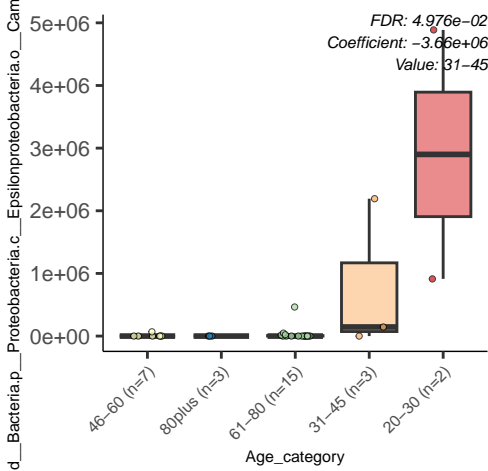

teroidetes.c\_\_Cytophagia.o\_\_Cytophagales.f\_\_Cytophagaceae.g

FDR: 4.976e-02  
Coefficient: -2.59e+02  
Value: 80plus

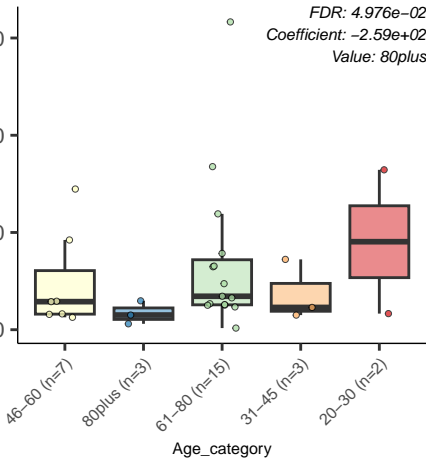

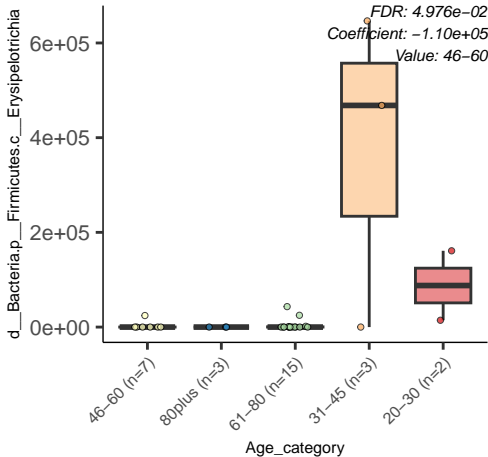

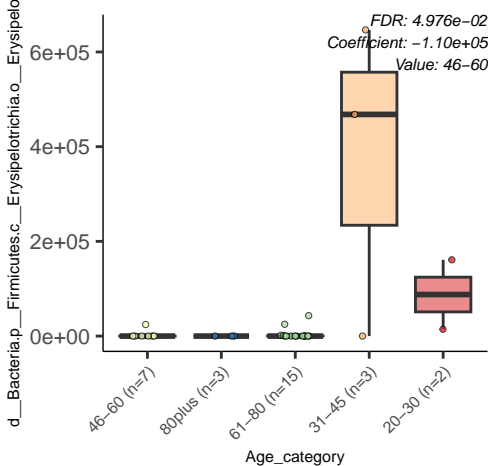

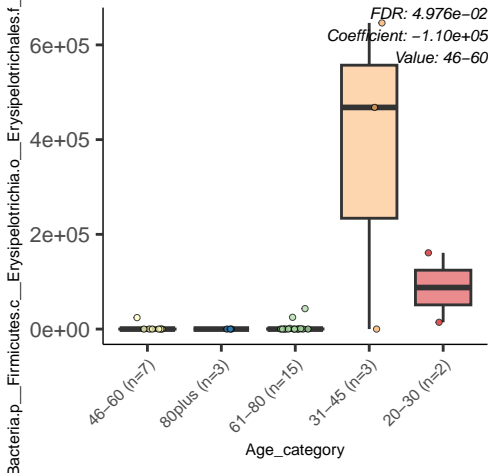



d\_Bacteria.p\_Acidobacteria

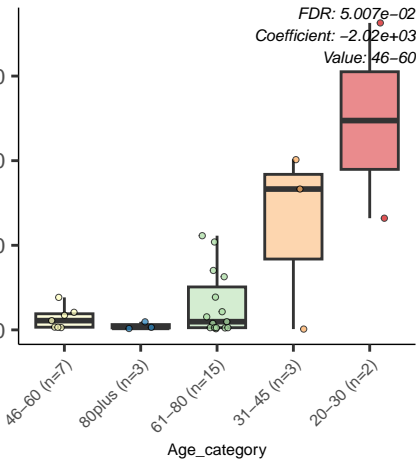

tertia.c\_\_Acidobacteriia.o\_\_Acidobacteriales.f\_\_Acidobacteriaceae.g

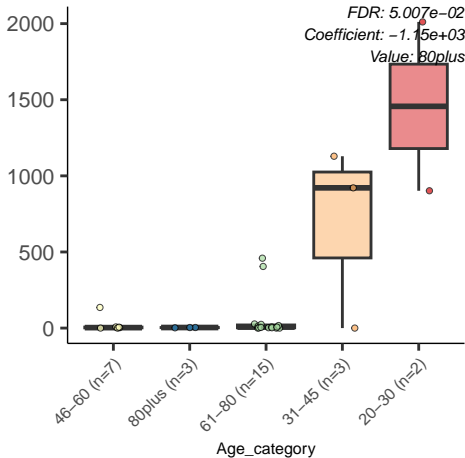

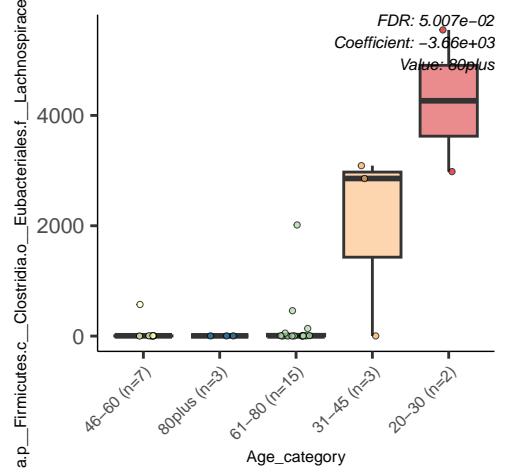

Neisseriaceae

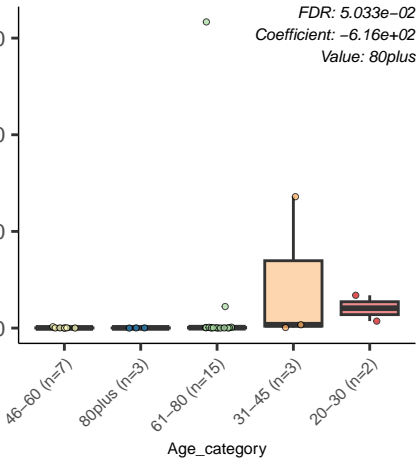

\_\_\_Epsilonproteobacteria.o\_\_Campylobacteriales.f\_\_Campylobacter

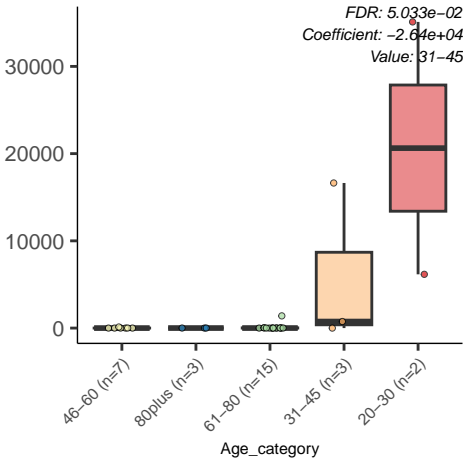

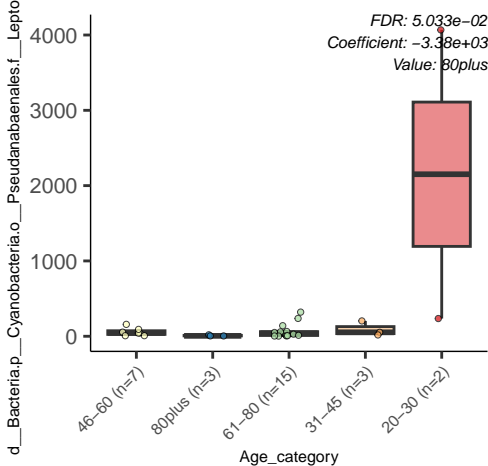

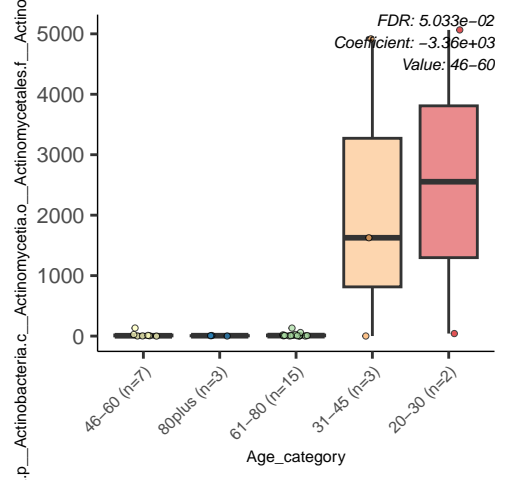

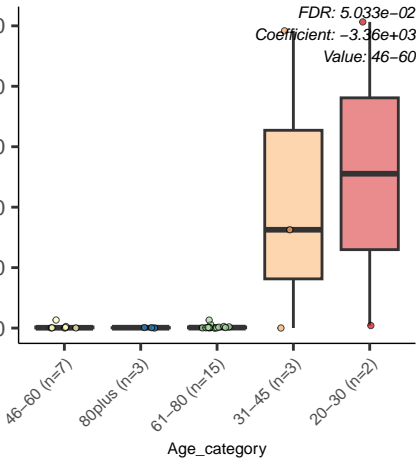



acteria.p\_\_Firmicutes.c\_\_Clostridia.o\_\_Eubacteriales.f\_\_Eubacteria

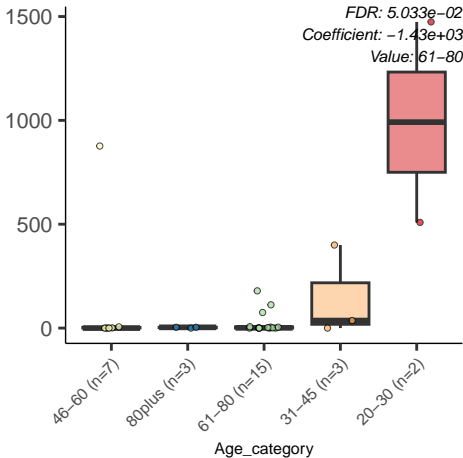

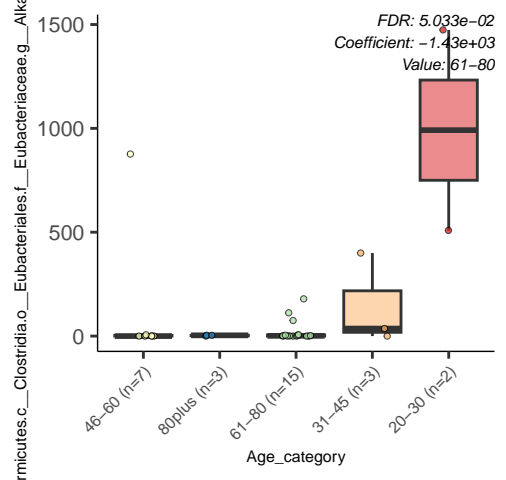

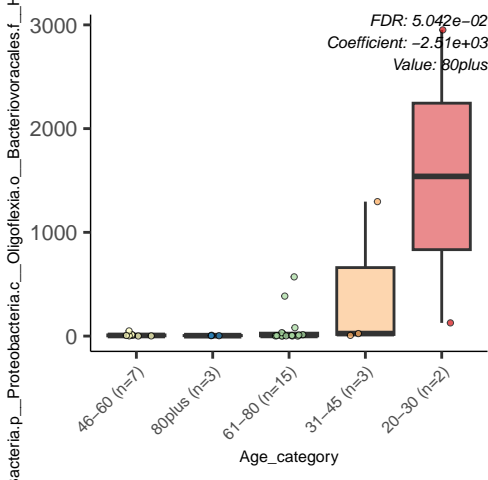

Proteobacteria.c\_\_Oligoflexia.o\_\_Bacteriovoracales.f\_\_Halobacteri

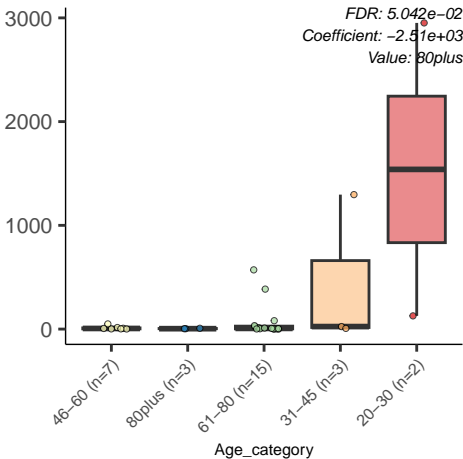

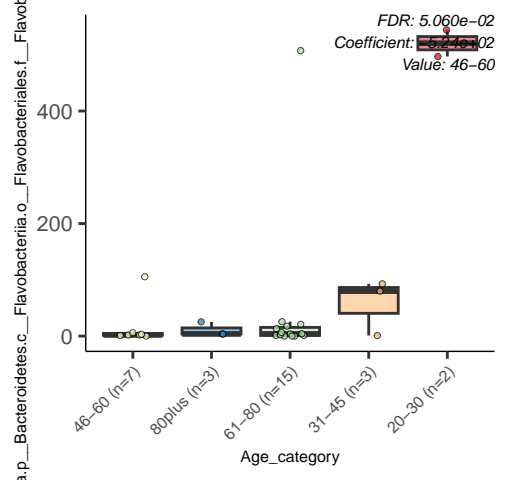

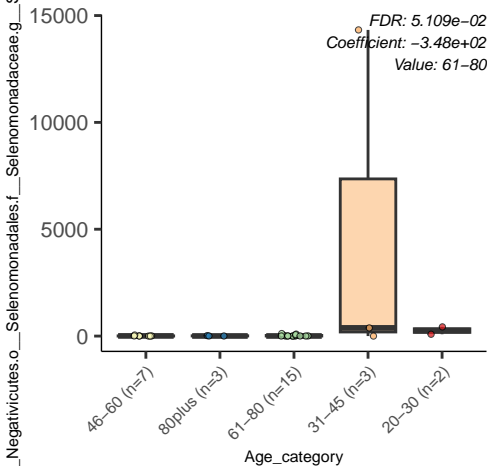

acteria.p\_\_Cyanobacteria.o\_\_Pseudanabaenales.f\_\_Leptolyngbya

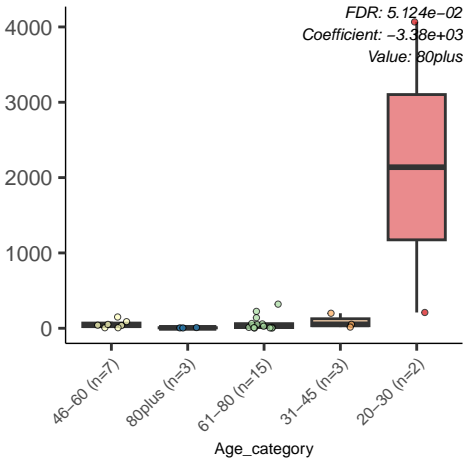

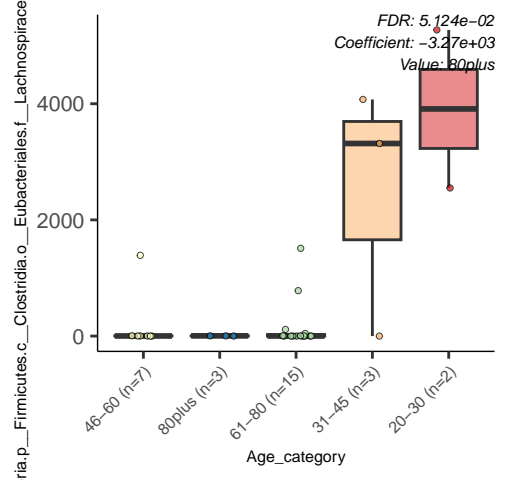



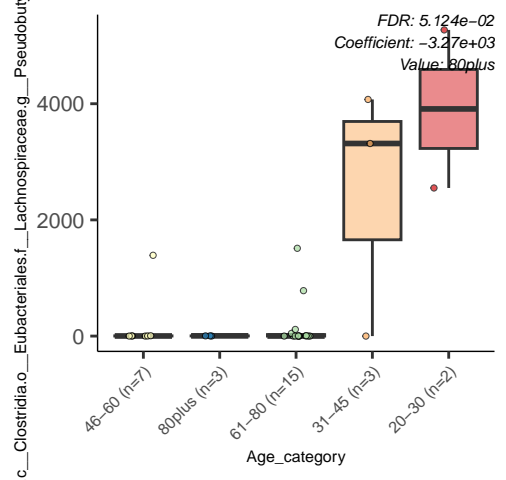

maproteobacteria.o\_\_Cardiobacteriales.f\_\_Cardiobacteriaceae.g\_\_C

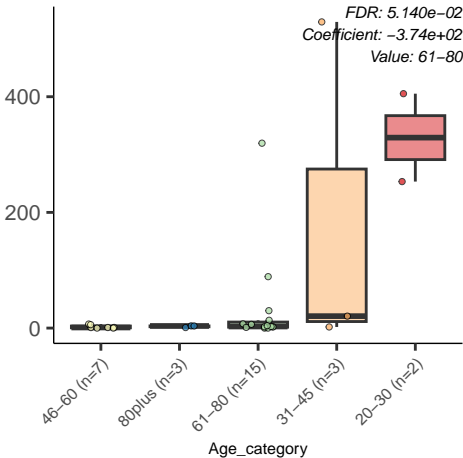

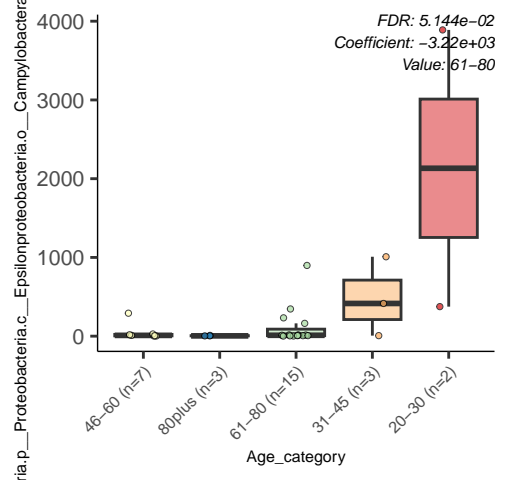

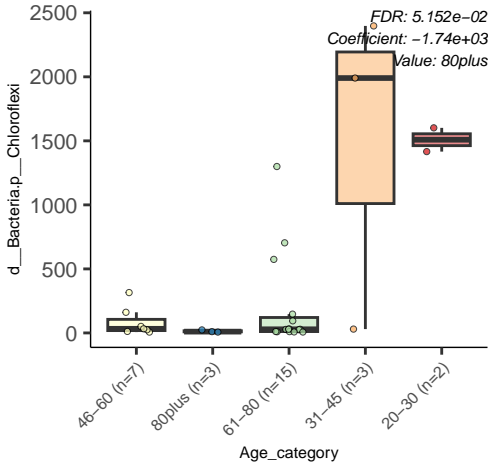

c\_Actinomycetia.o\_Propionibacteriales.f\_Propionibacteriaceae.g

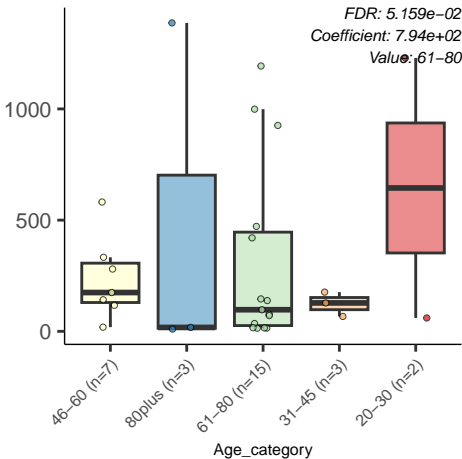

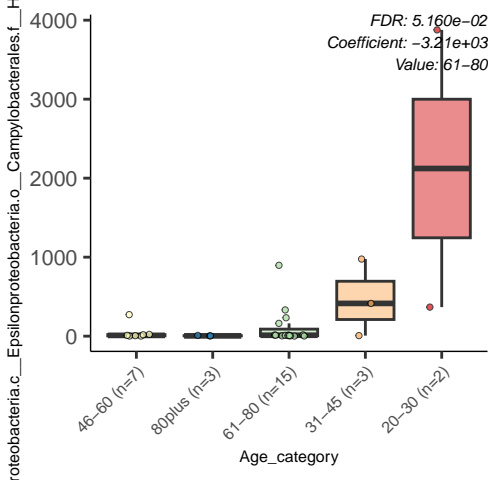

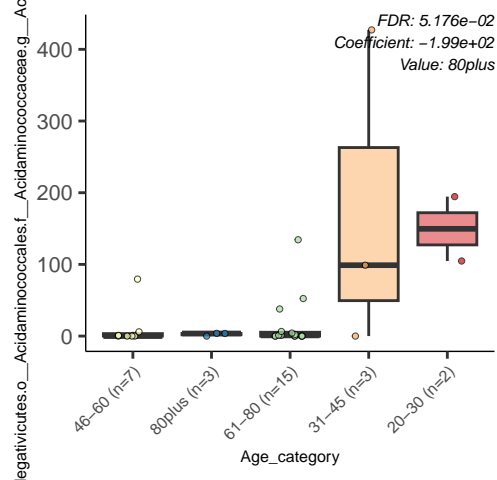

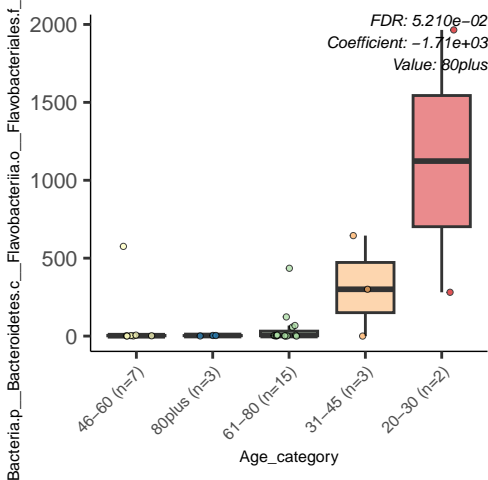



Bacteroidetes.c\_Flavobacteriia.o\_Flavobacteriales.f\_Blattaba

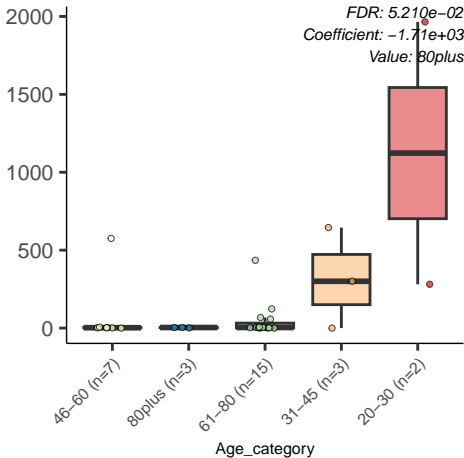

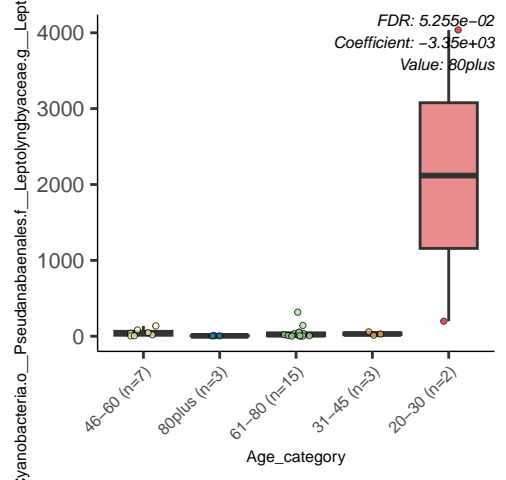

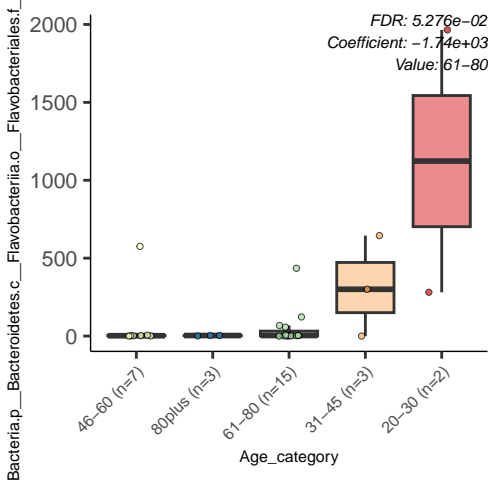

Bacteroidetes.c\_Flavobacteriia.o\_Flavobacteriales.f\_Blattaba

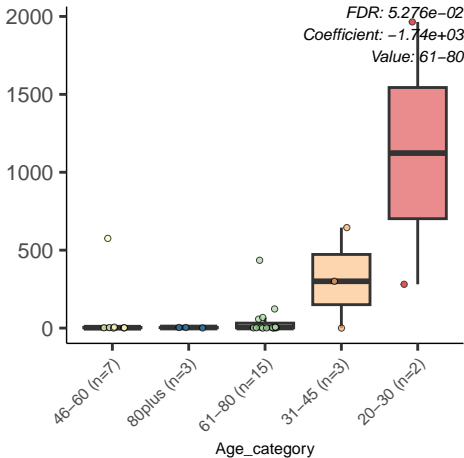

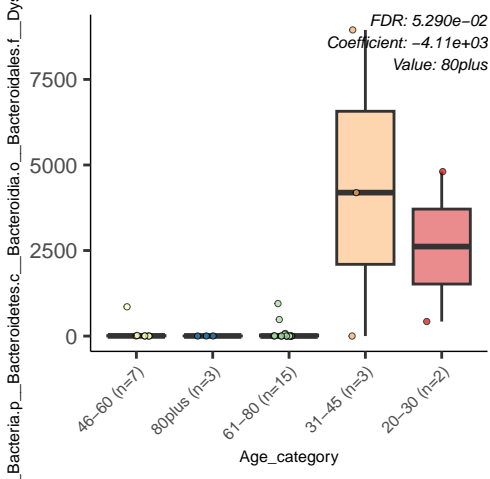

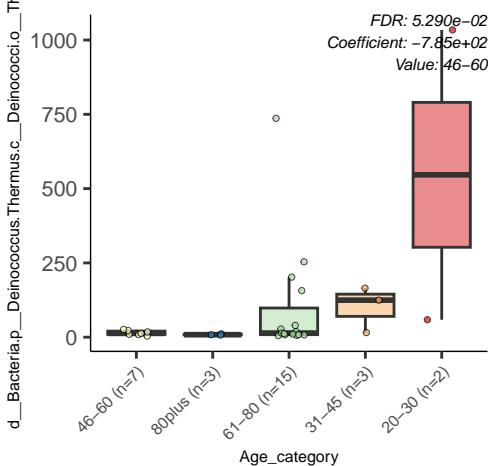

l\_Bacteria.p\_Deinococcus.Thermus.c\_Deinococci.o\_Thermales

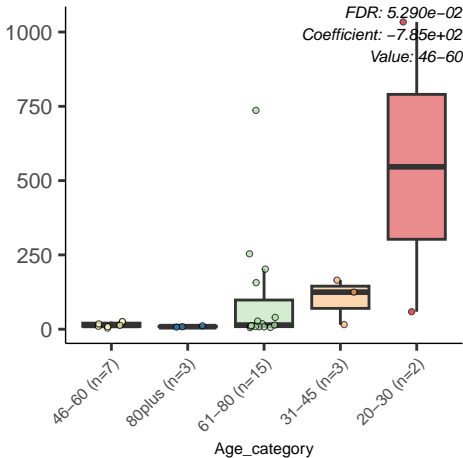

acteria.p\_\_Firmicutes.c\_\_Clostridia.o\_\_Eubacteriales.f\_\_Eubacteria

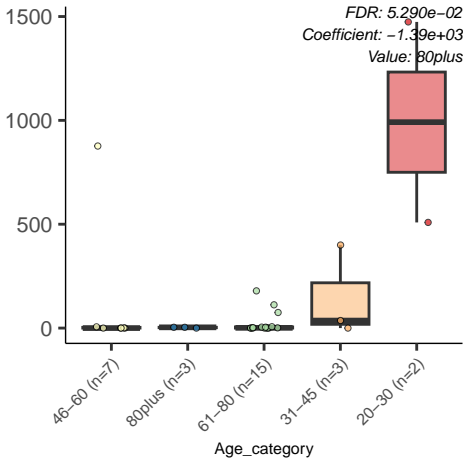



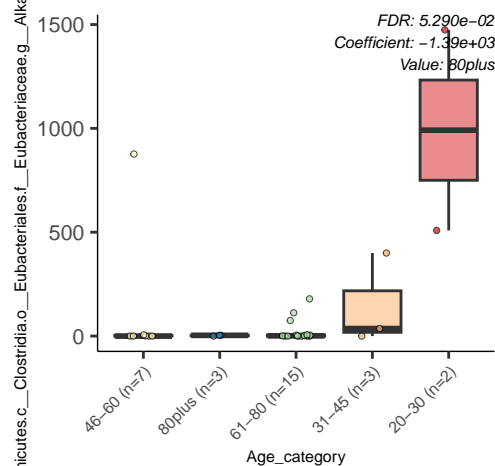

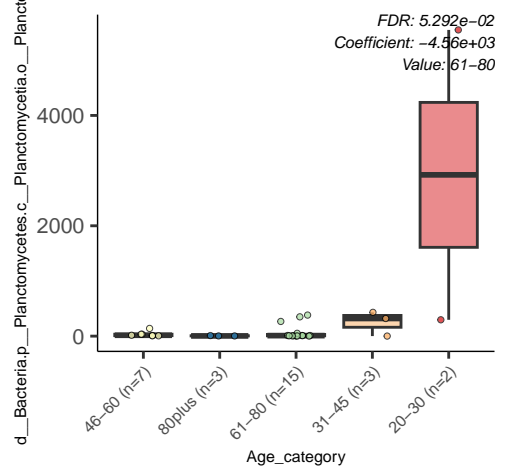

acteria.p\_\_Planctomycetes.c\_\_Planctomycetia.o\_\_Planctomycetales.

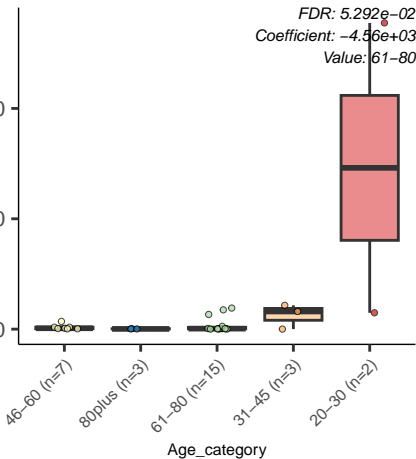

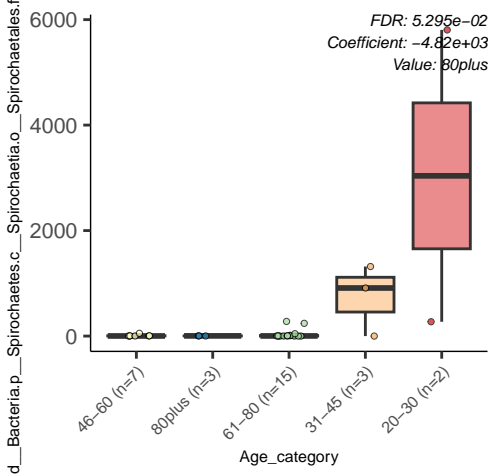

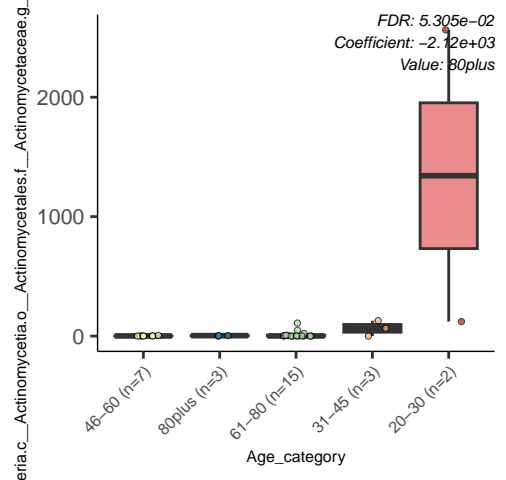

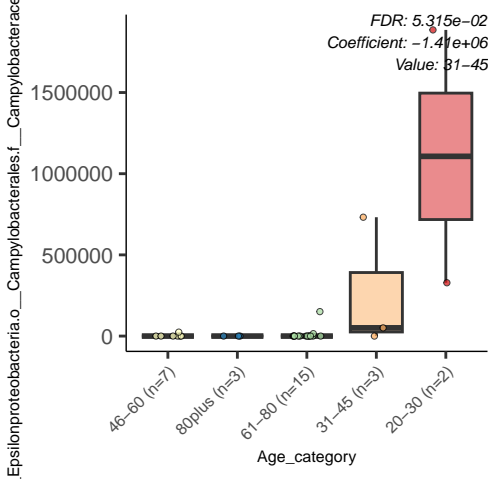

bacteroidetes.c\_\_Bacteroidia.o\_\_Bacteroidales.f\_\_Prevotellaceae.g

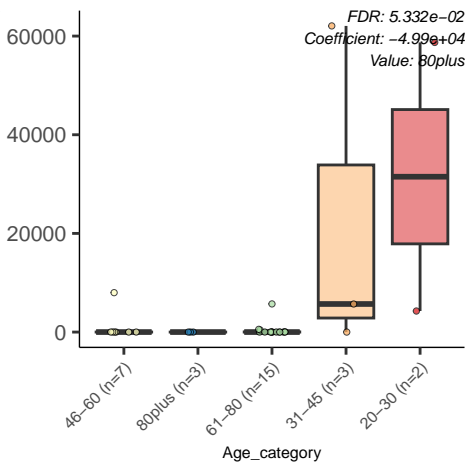

d\_\_Bacteria.p\_\_Chloroflexi.c\_\_Anaerolineae

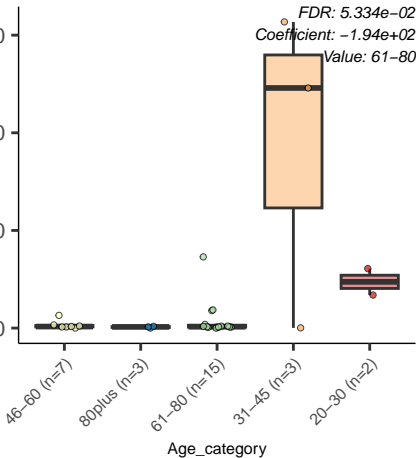



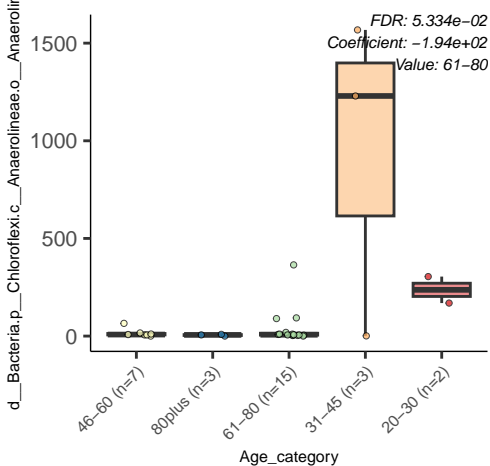

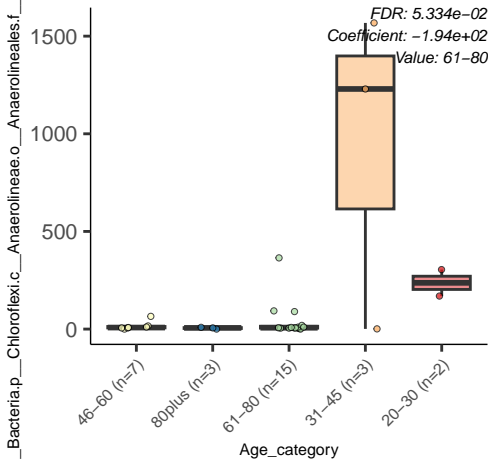

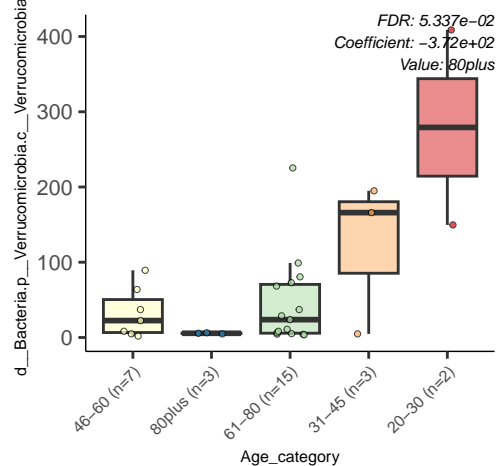

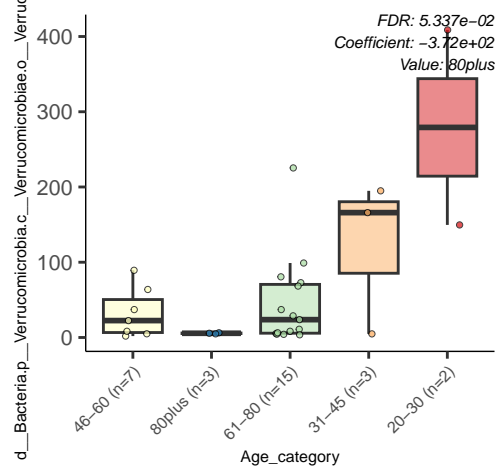

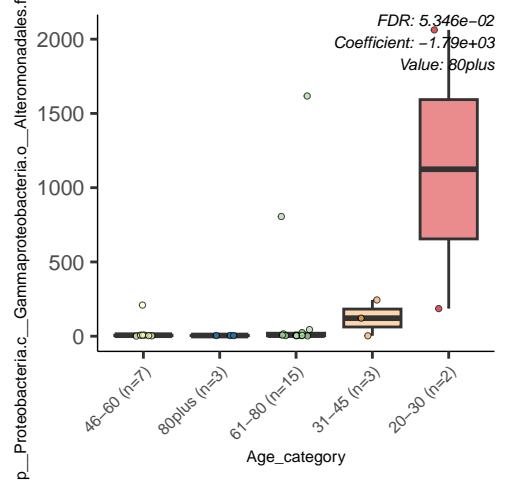

d\_\_Bacteria.p\_\_Nitrospirae.c\_\_Nitrospira

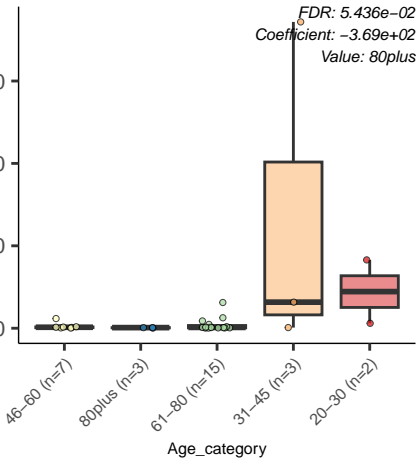

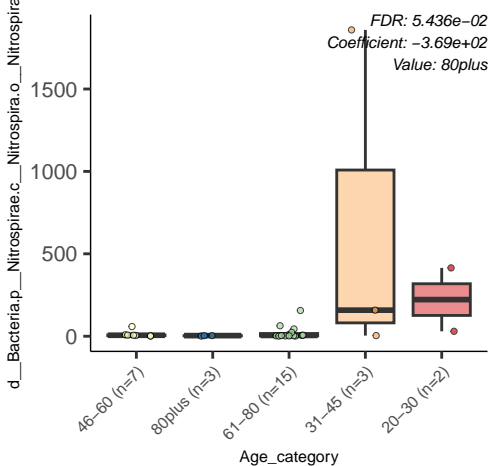

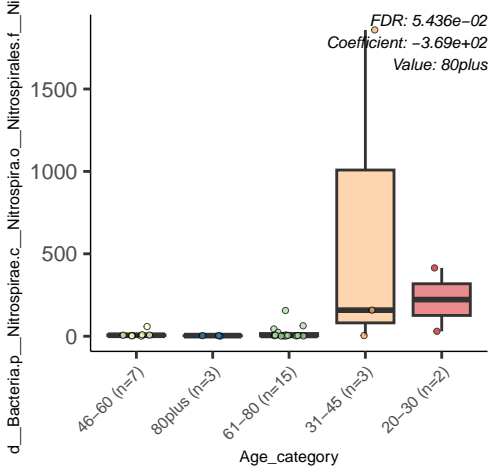



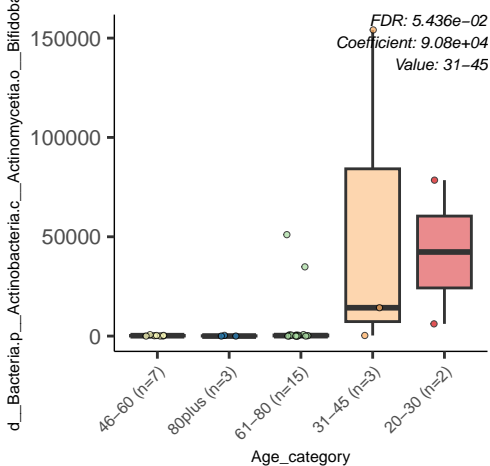

Bacteria.p\_Actinobacteria.c\_Actinomycetia.o\_Bifidobacteriales.f

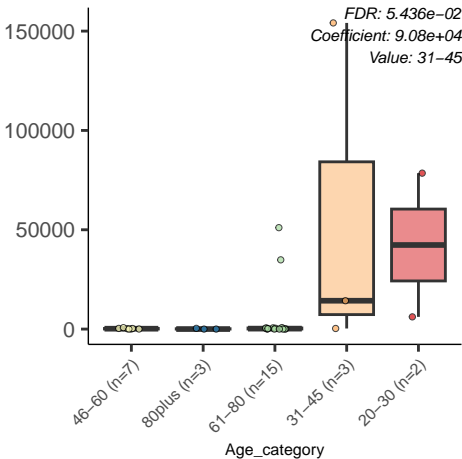

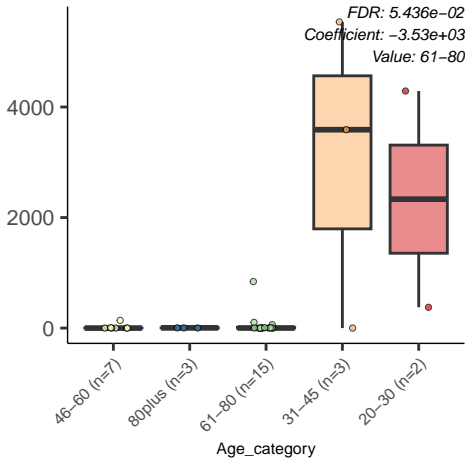

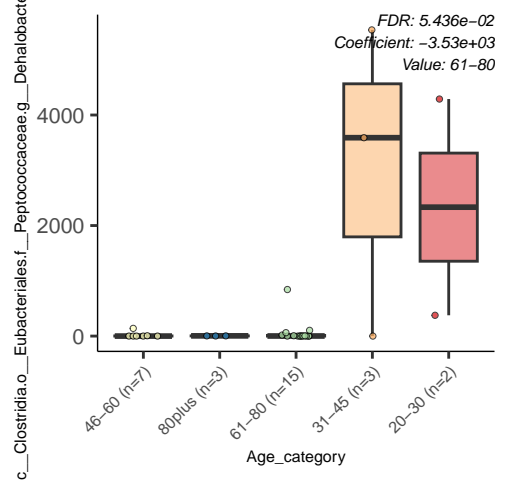

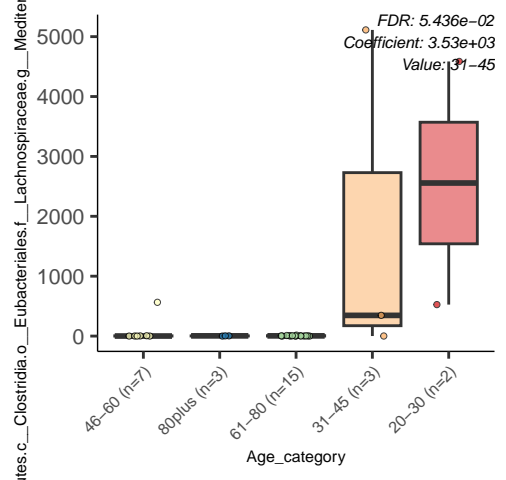

c\_\_Clostridia.o\_\_Eubacteriales.f\_\_Eubacteriales.Family.XIII...Incerta

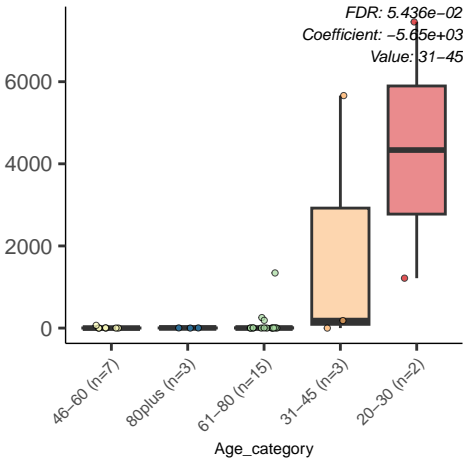

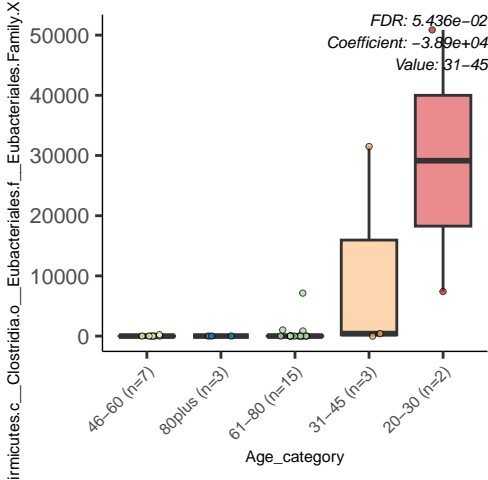

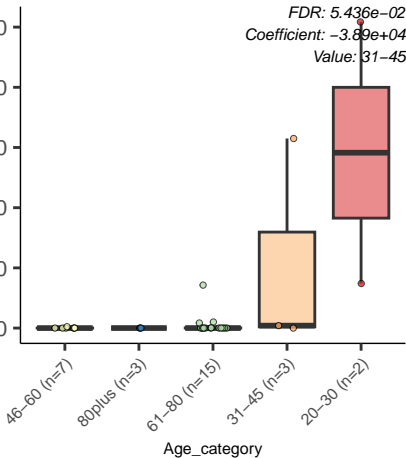



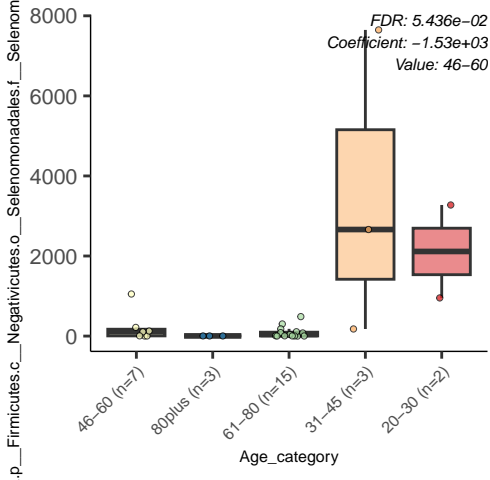

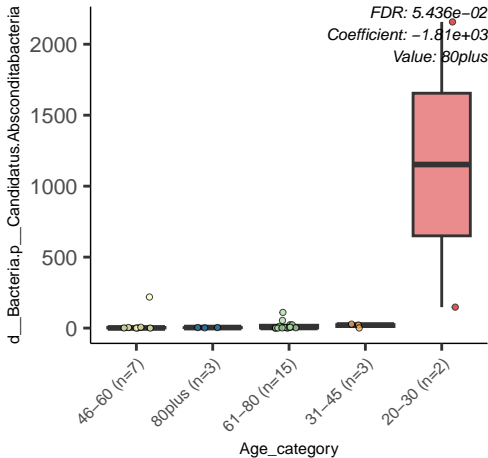

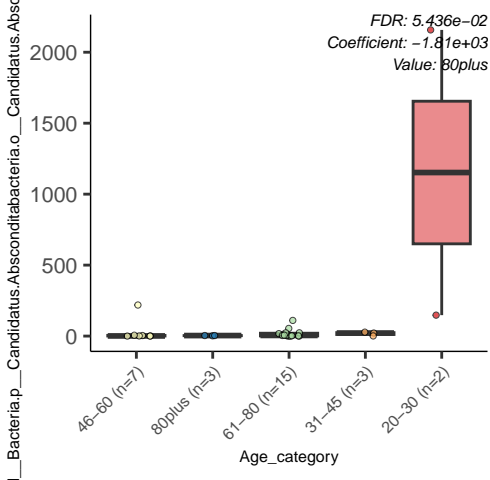

ndidatus.Absconditabacteria.o\_\_Candidatus.Absconditabacterales.f.

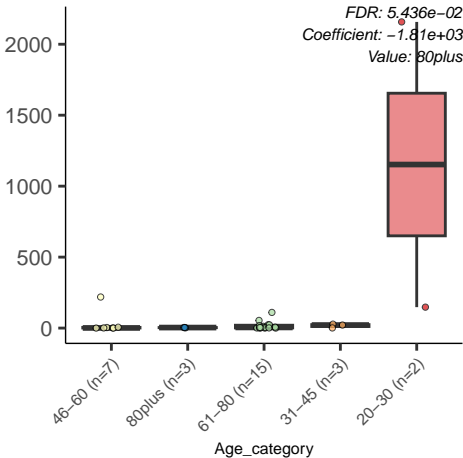

ditabacteria.o\_\_Candidatus.Absconditabacterales.f\_\_Candidatus.Ab

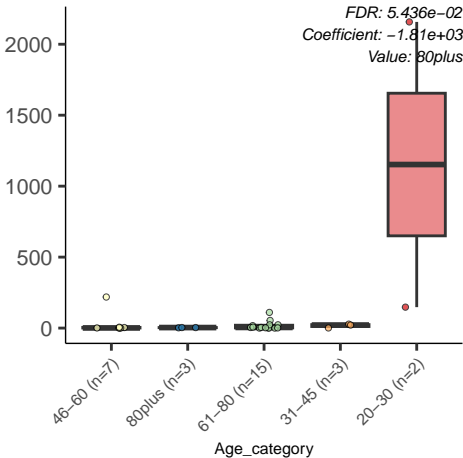

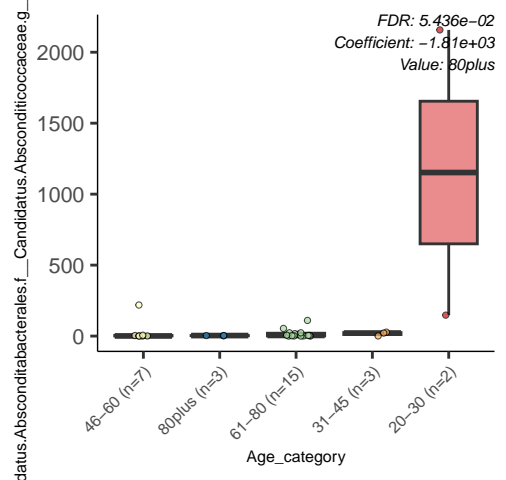

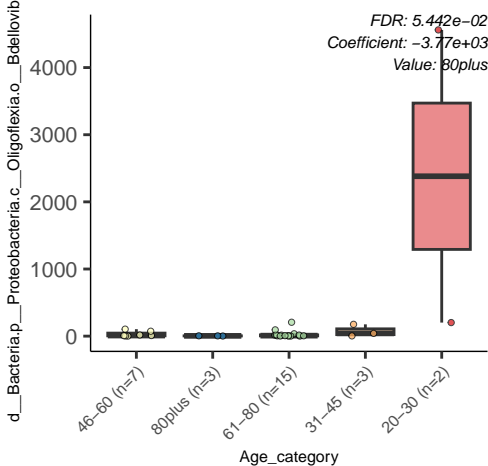

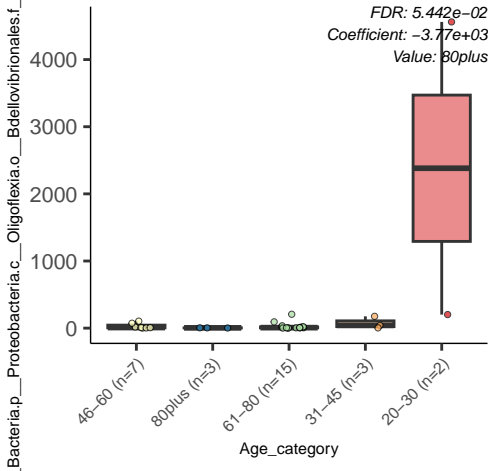



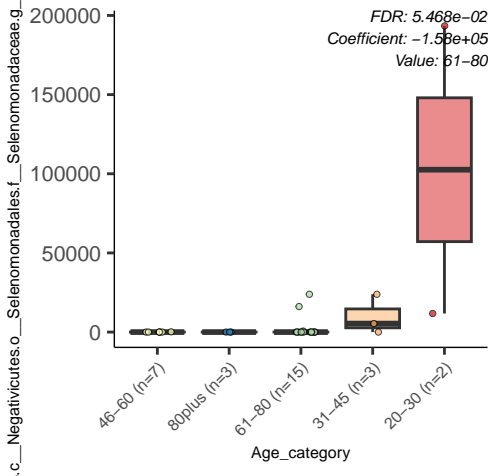

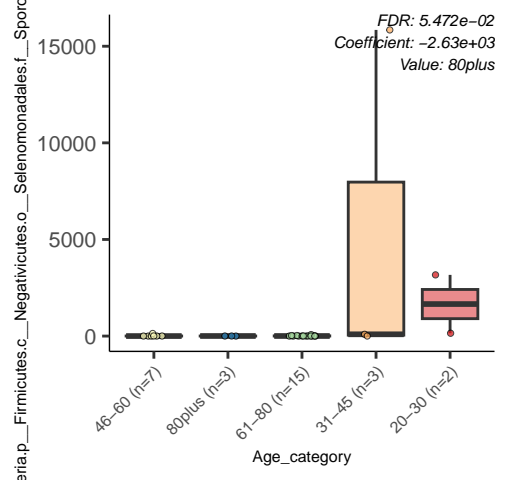

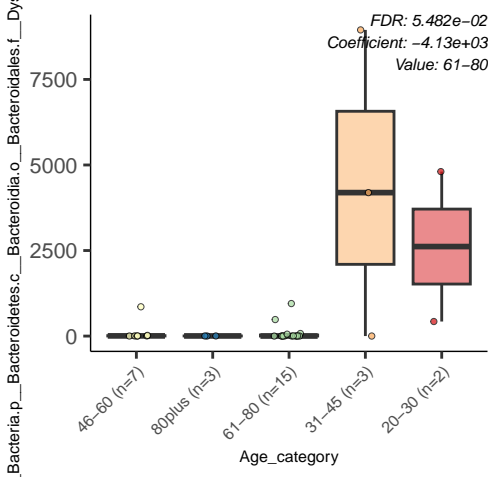

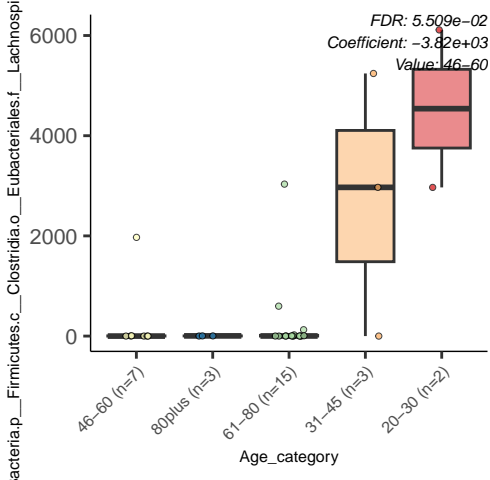

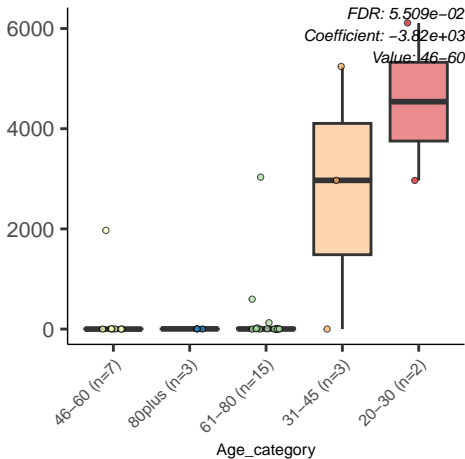

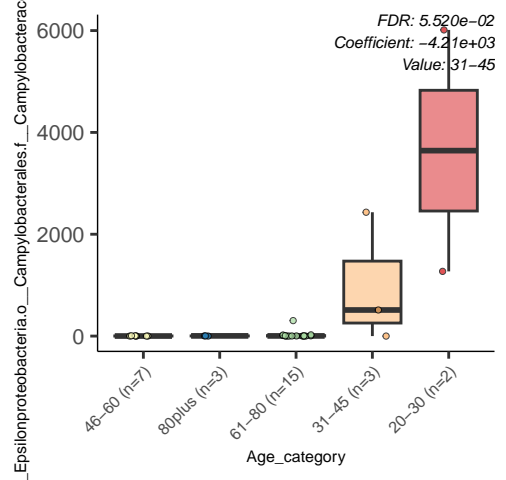

a.p\_\_Proteobacteria.c\_\_Oligoflexia.o\_\_Bdellovibrionales.f\_\_Bdellov

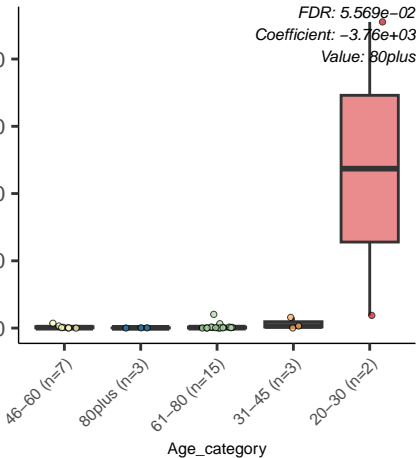

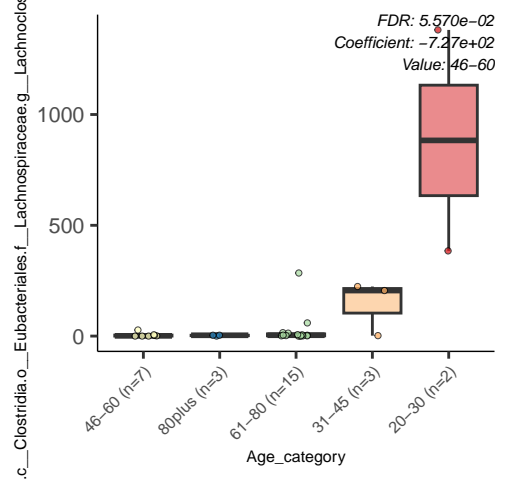



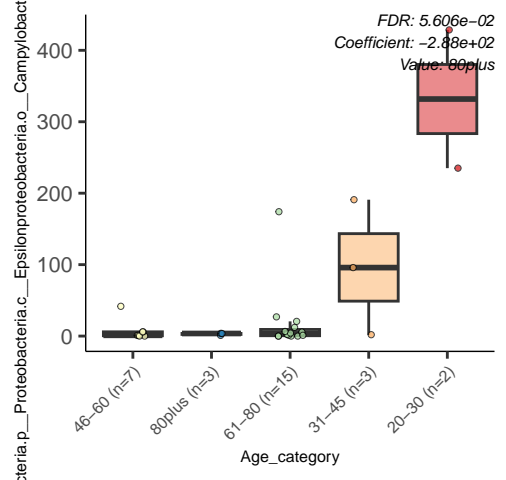

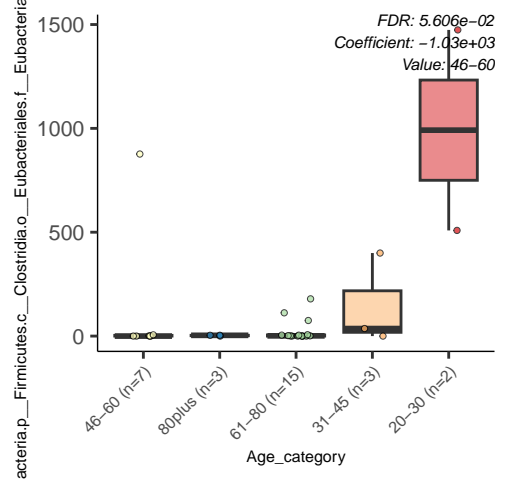

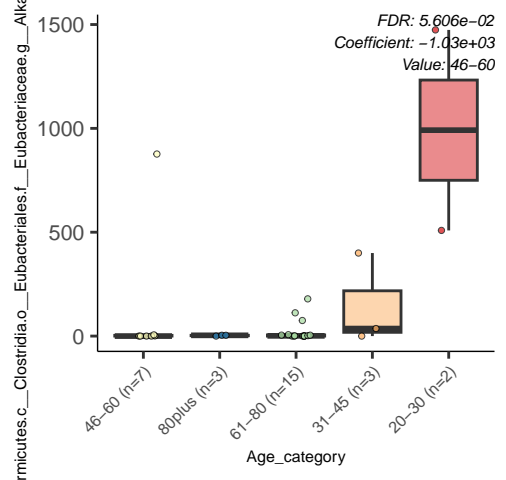

Firmicutes.c\_\_Clostridia.o\_\_Eubacteriales.f\_\_Eubacteriales.Family.

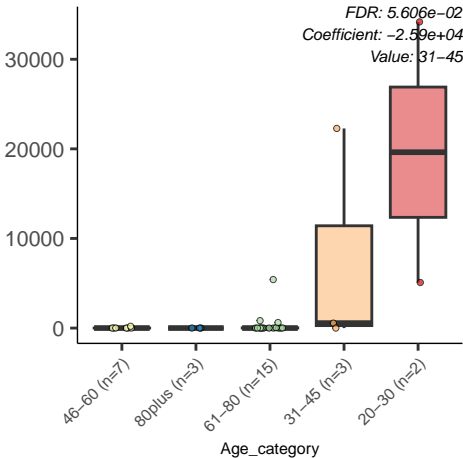

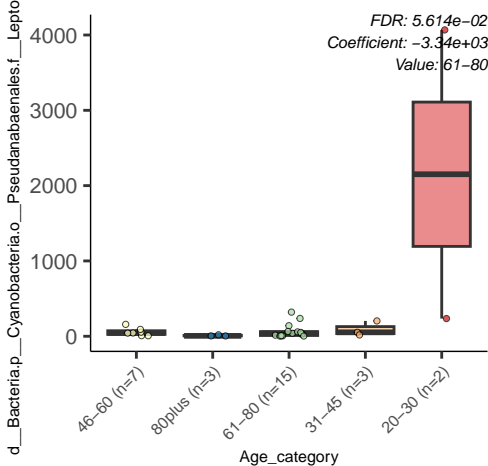

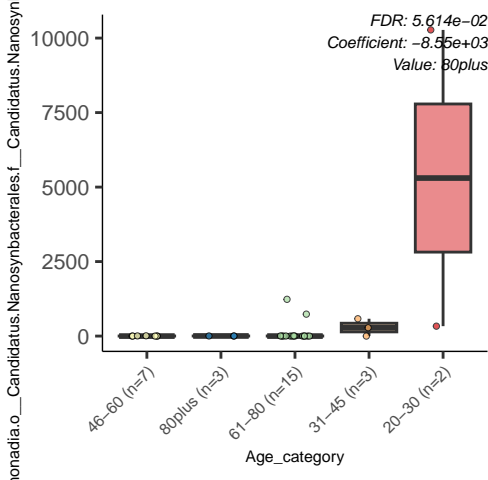

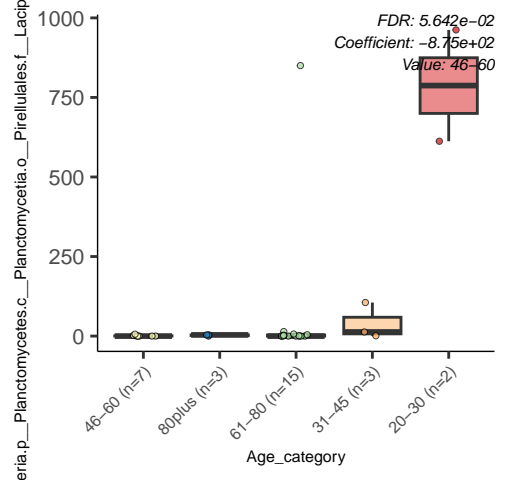

ctomycetes.c\_\_Planctomycetia.o\_\_Pirellulales.f\_\_Lacipirellulaceae.

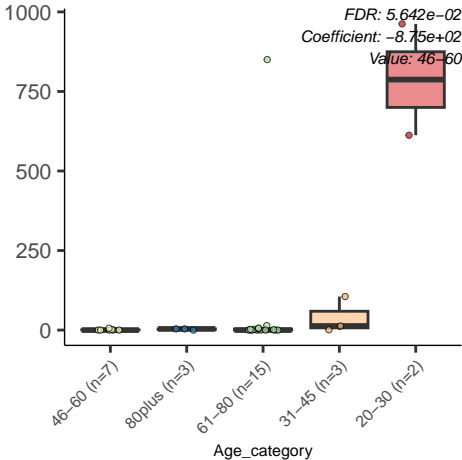



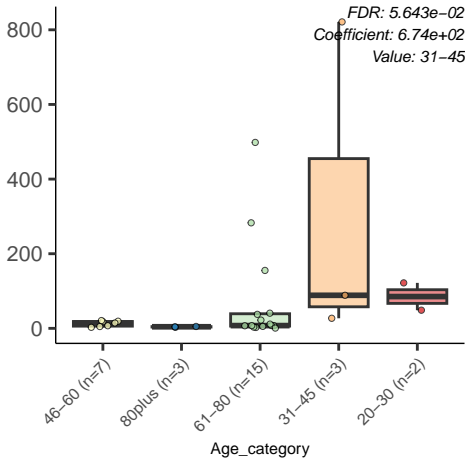

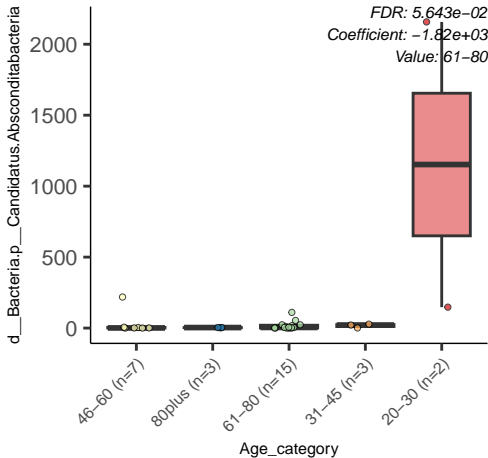

l\_Bacteria.p\_\_Candidate.Absconditabacteria.o\_\_Candidate.Absc

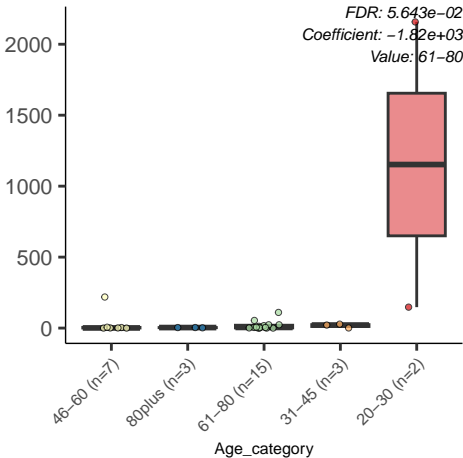

ndidatus.Absconditabacteria.o\_\_Candidatus.Absconditabacterales.f.

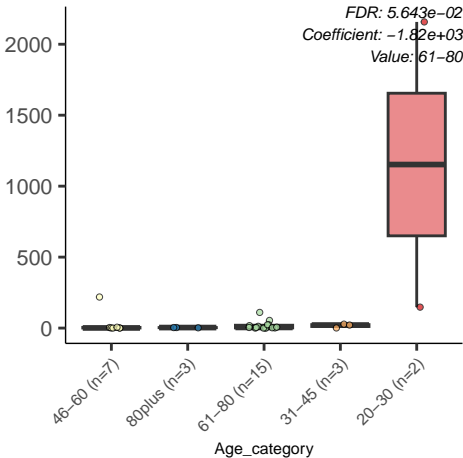

ditabacteria.o\_\_Candidatus.Absconditabacterales.f\_\_Candidatus.Ab

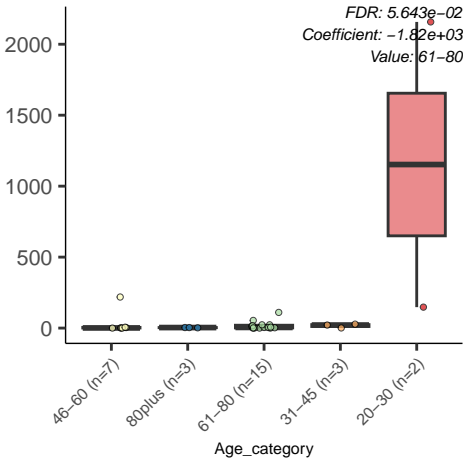

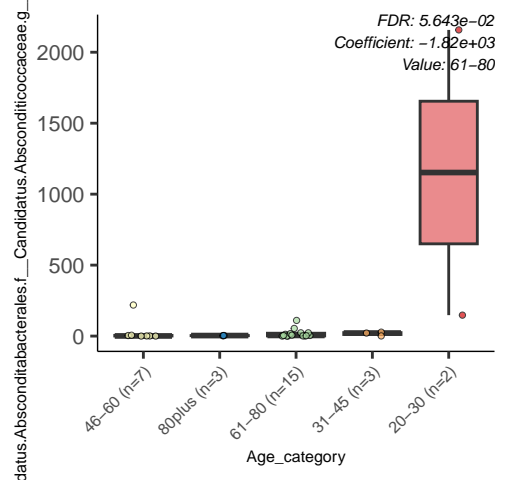

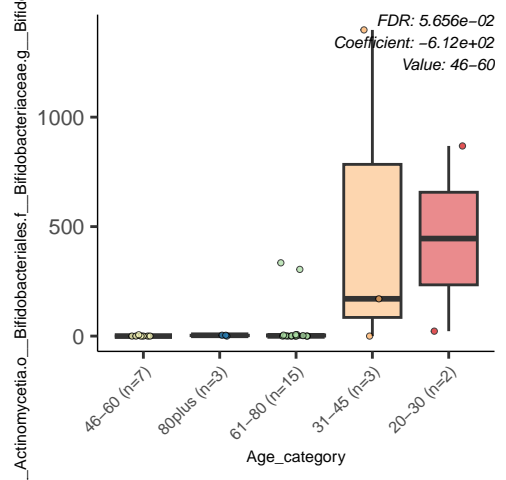

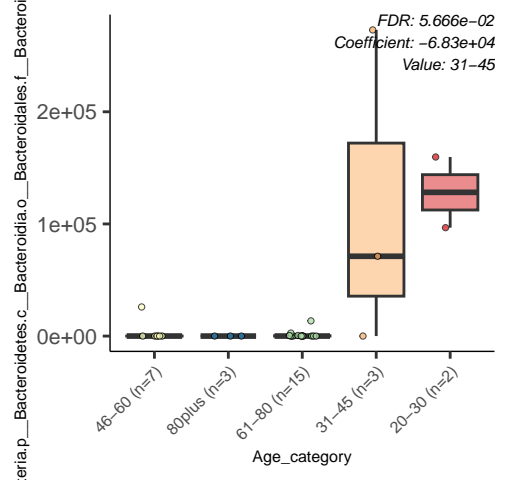



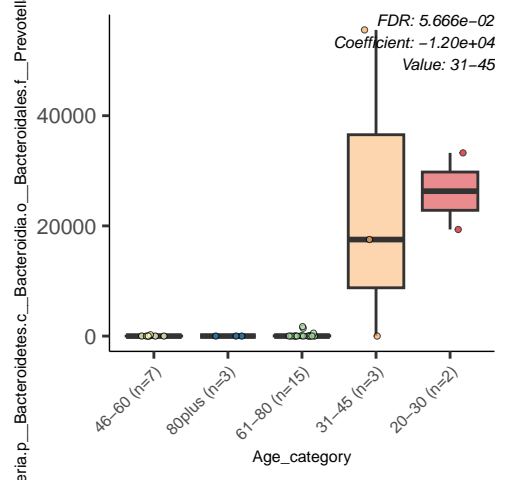

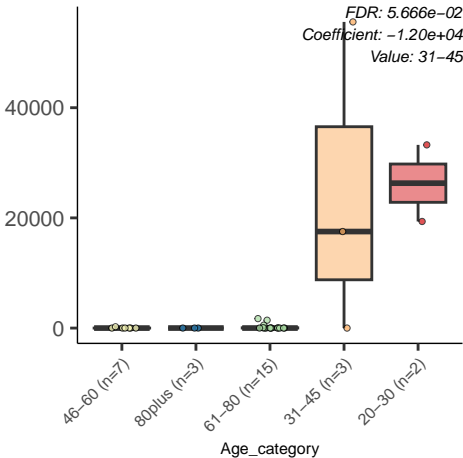

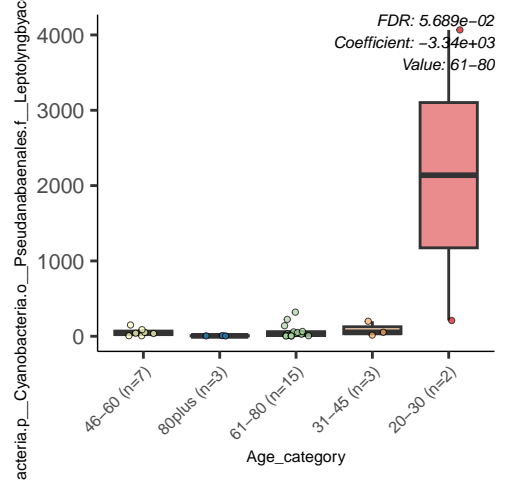

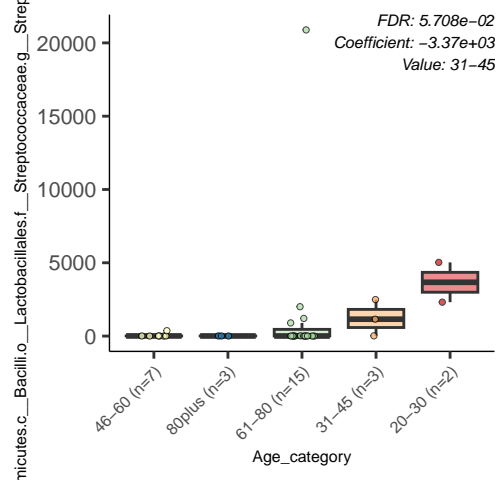

bacteroidetes.c\_\_Bacteroidia.o\_\_Bacteroidales.f\_\_Prevotellaceae.g

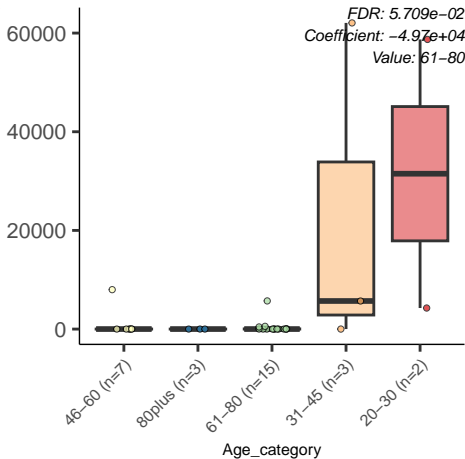

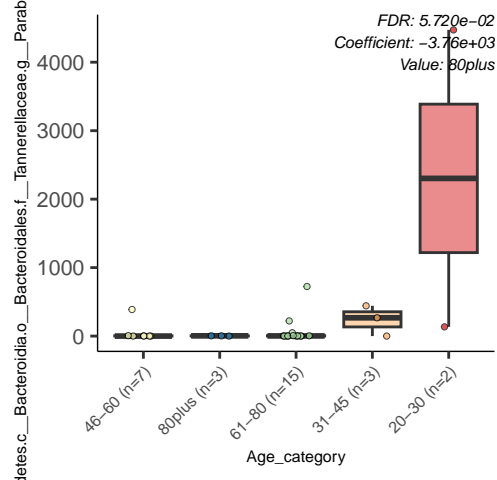

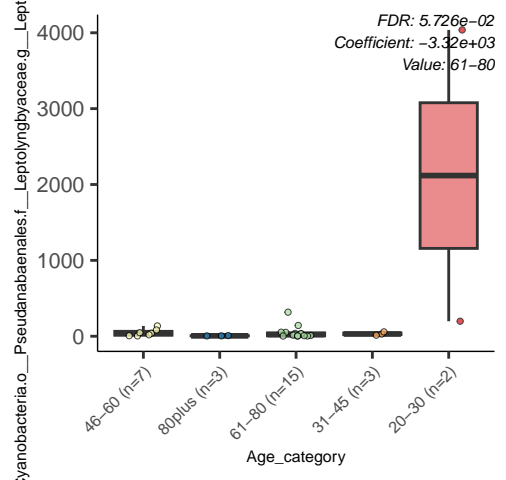

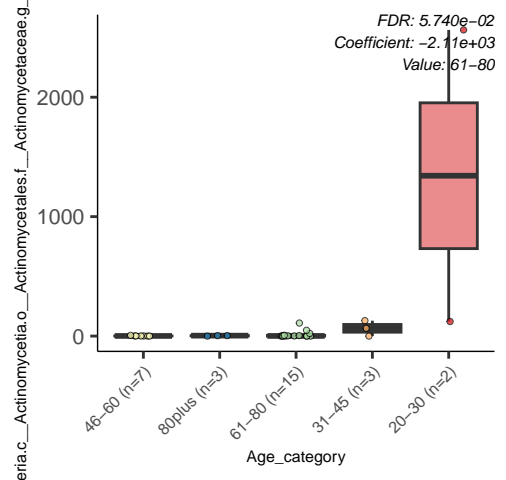



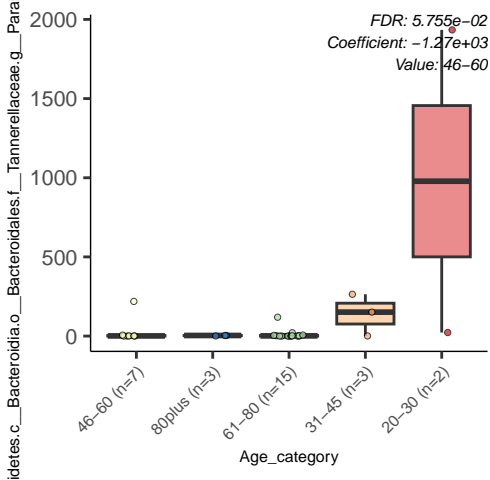

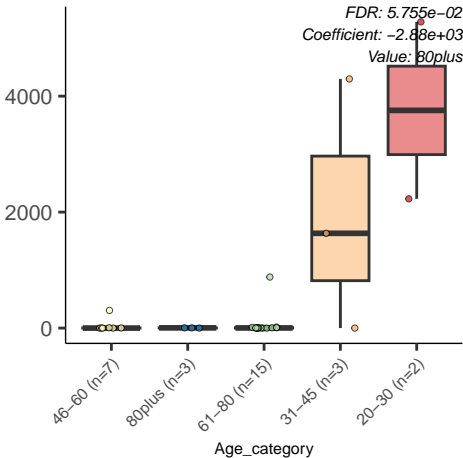

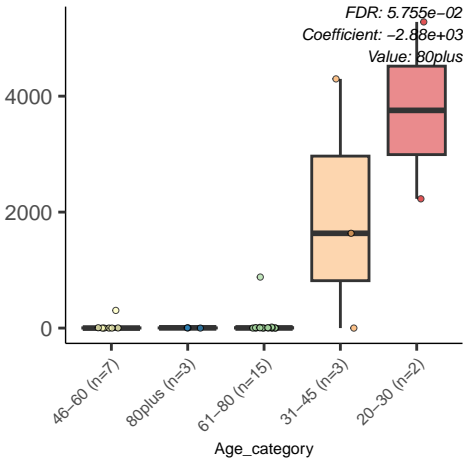

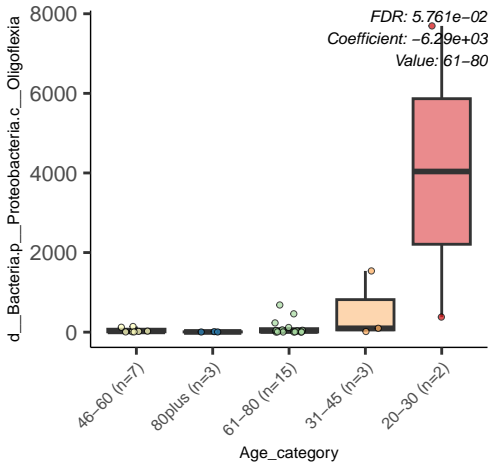

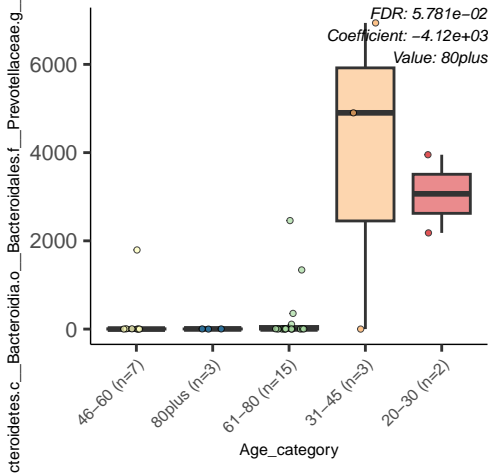

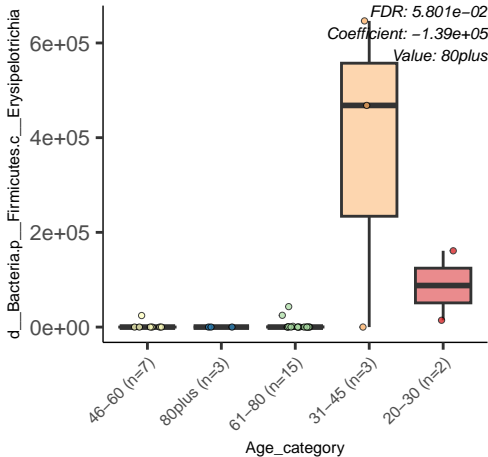

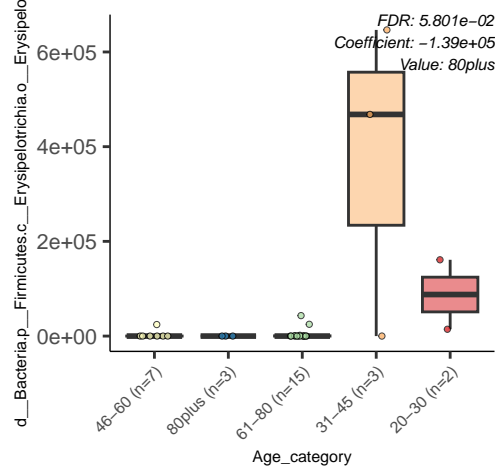

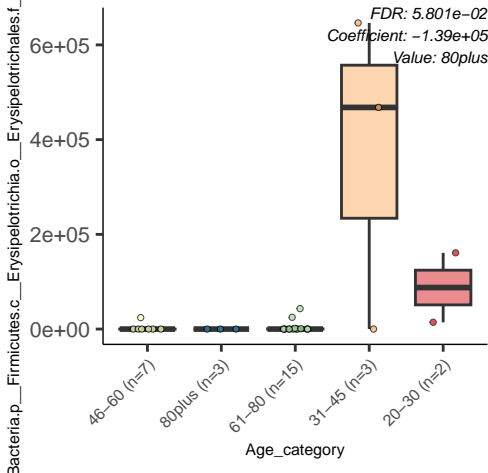



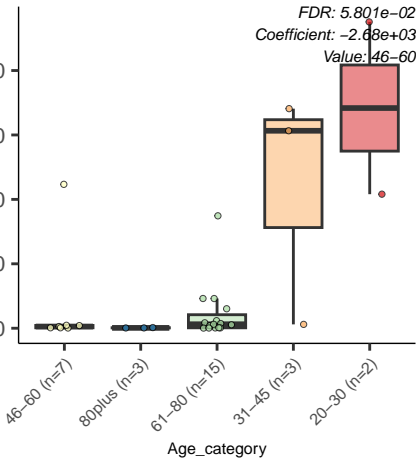

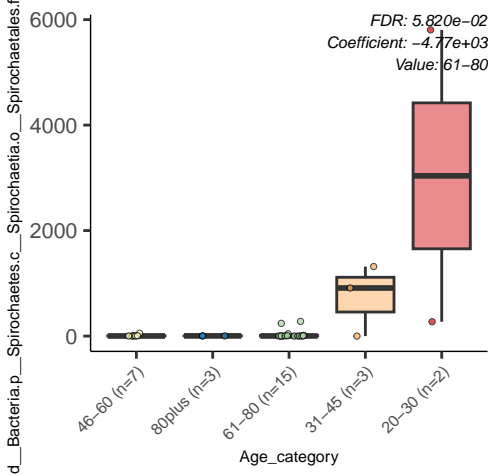

Firmicutes.c\_\_Negativicutes.o\_\_Acidaminococcales.f\_\_Acidaminoc

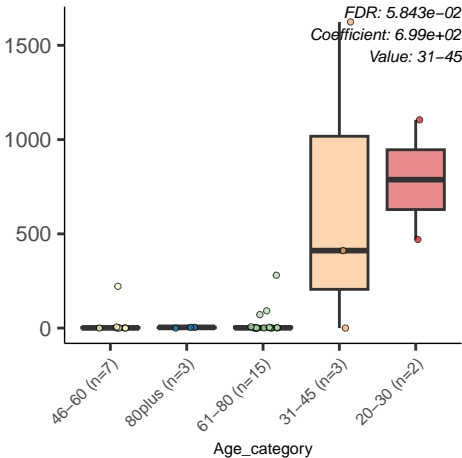

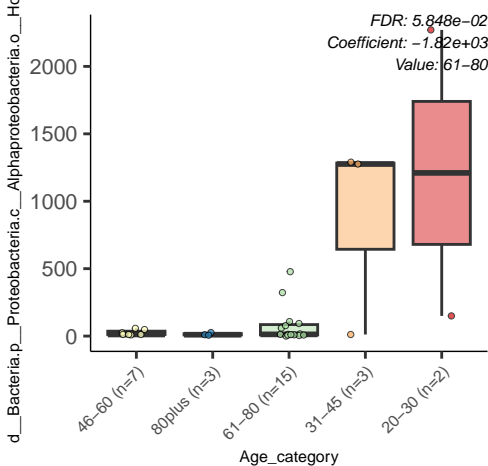

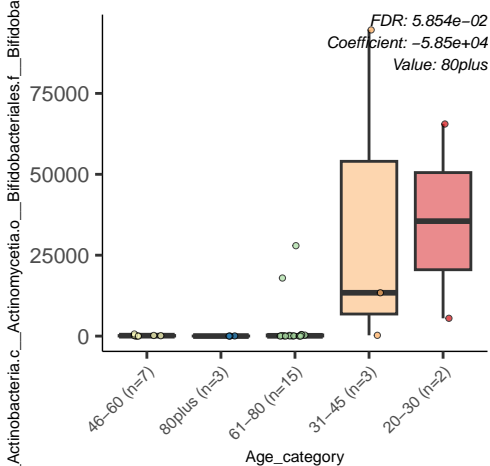

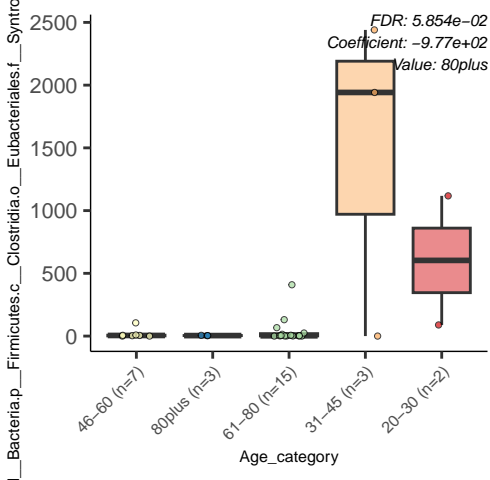

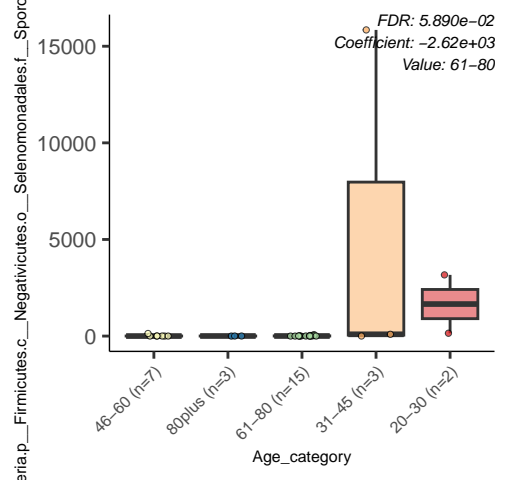

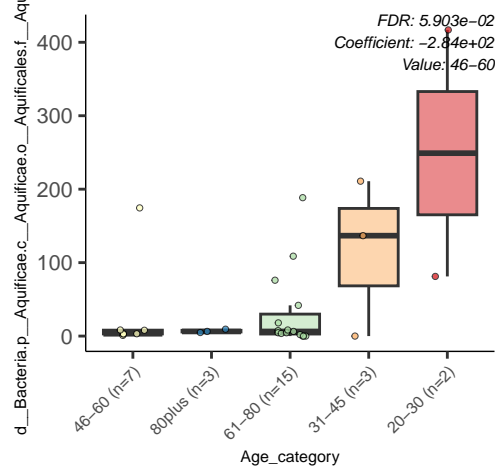



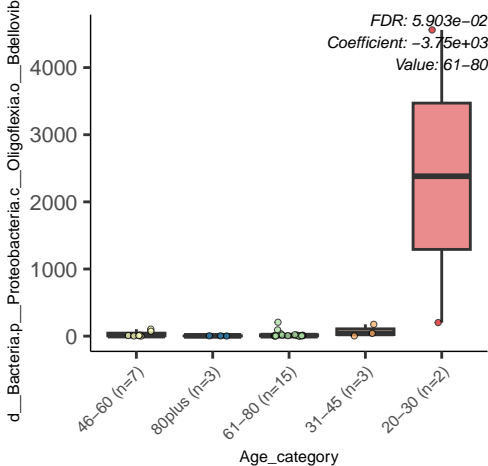

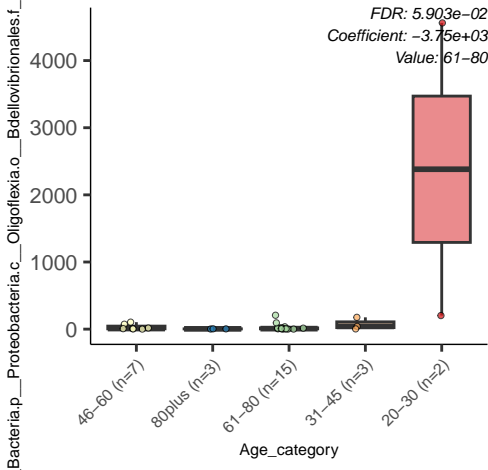

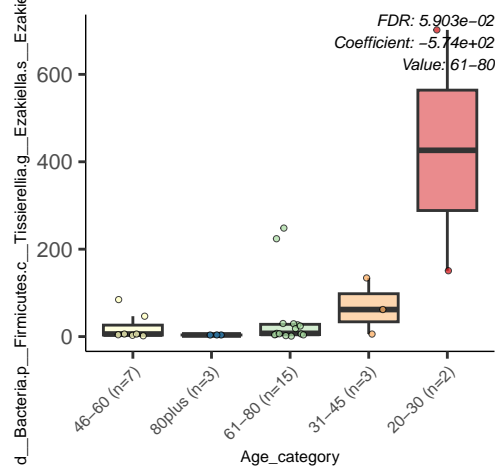

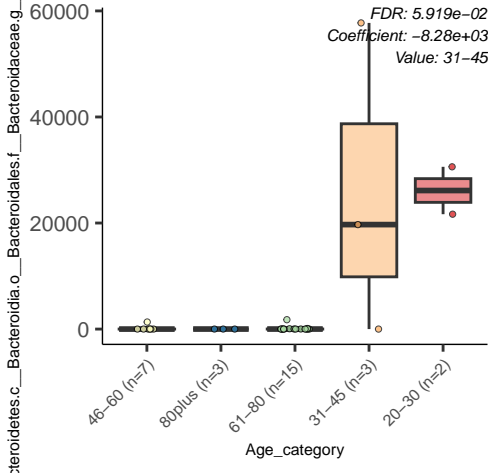

ria.p\_\_Firmicutes.c\_\_Clostridia.o\_\_Eubacteriales.f\_\_Lachnospirace

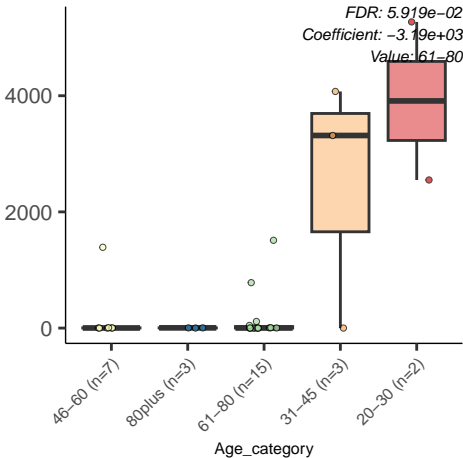

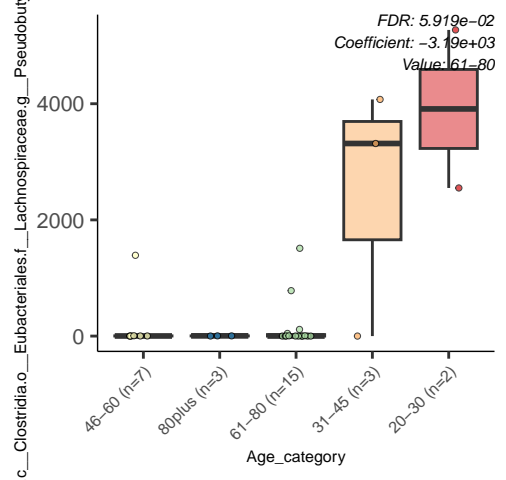

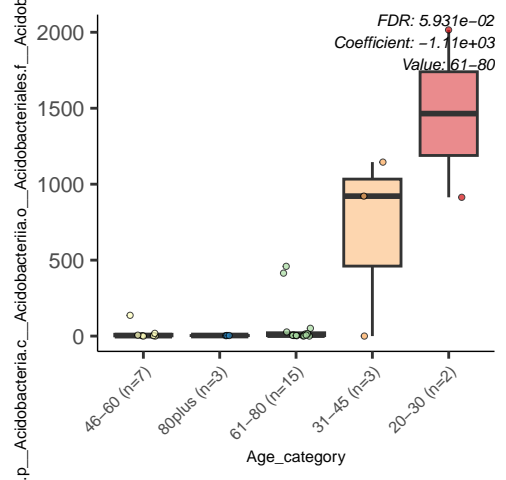

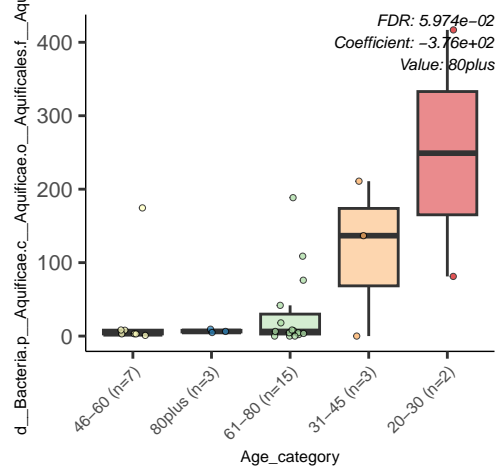



a.p\_\_Proteobacteria.c\_\_Oligoflexia.o\_\_Bdellovibrionales.f\_\_Bdellov

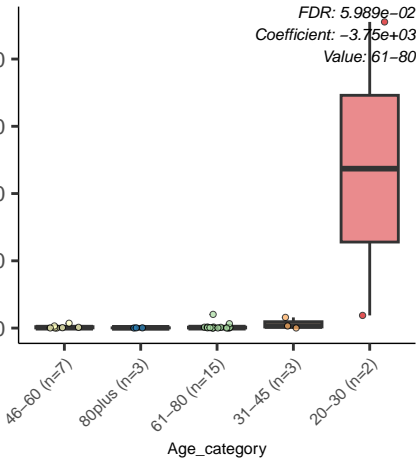

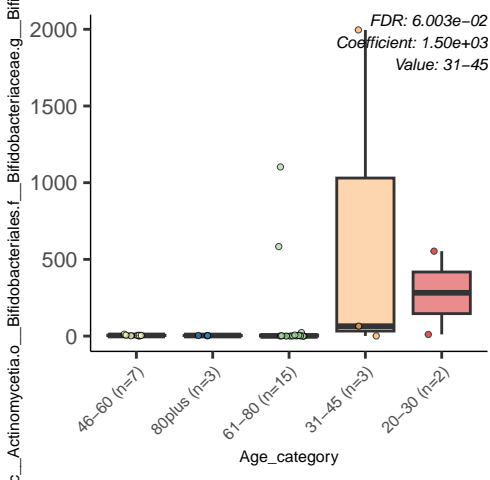

Bacteria.p\_\_Proteobacteria.c\_\_Alphaproteobacteria.o\_\_Holosporales

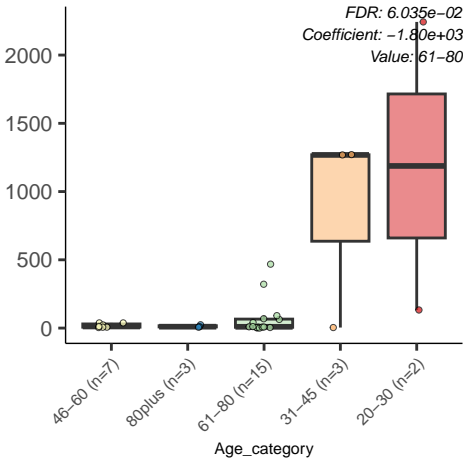

detes.c\_\_Flavobacteriia.o\_\_Flavobacteriales.f\_\_Flavobacteriaceae.g

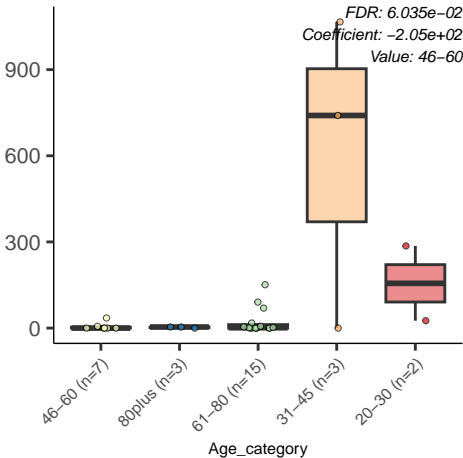

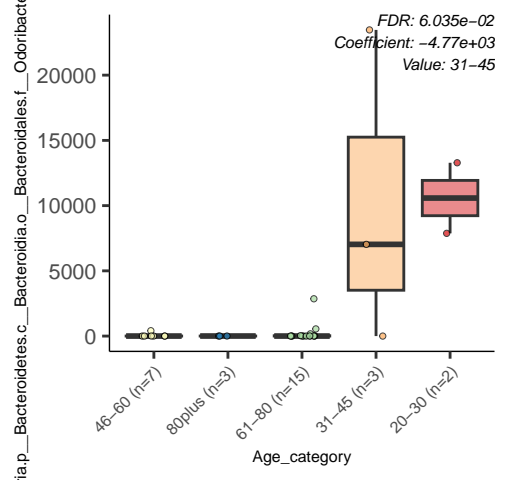

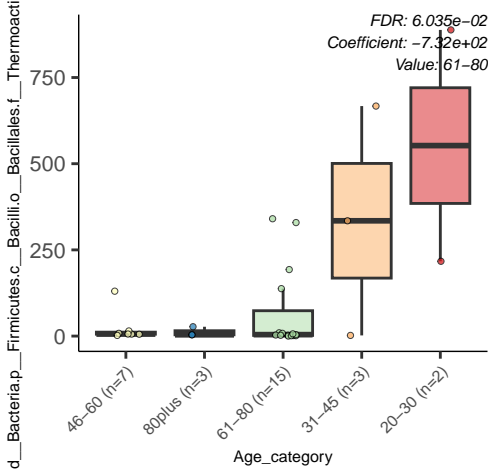

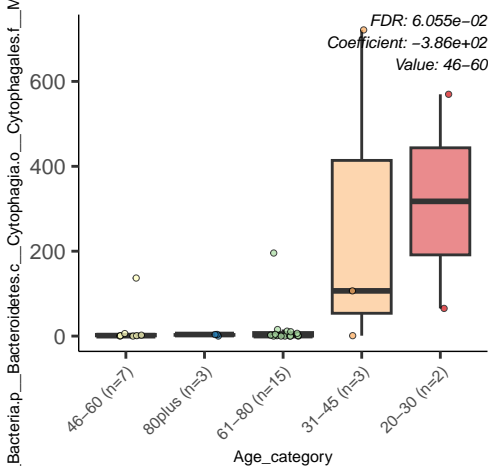

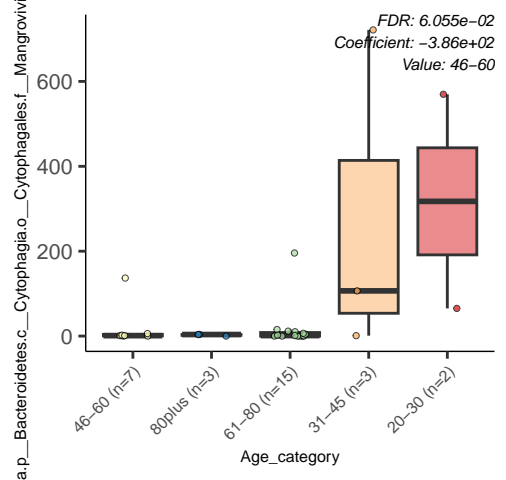



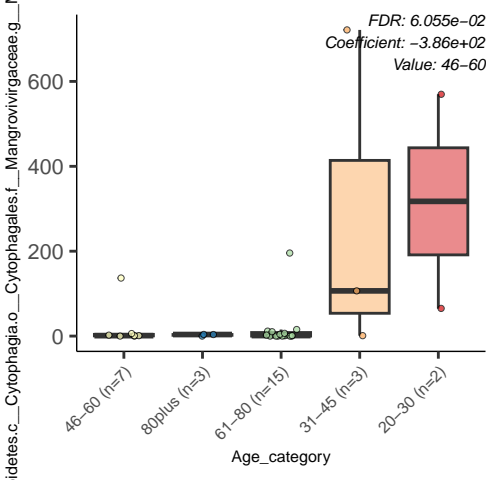

es.c\_\_Flavobacteriia.o\_\_Flavobacteriales.f\_\_Blattabacteriaceae.g

FDR: 6.055e-02  
Coefficient: -1.15e+03  
Value: 46-60

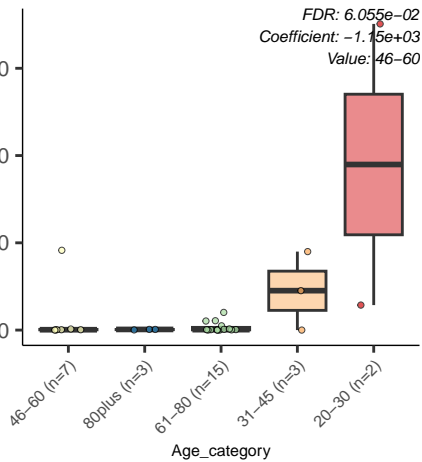

p\_\_Bacteroidetes.c\_\_Flavobacteriia.o\_\_Flavobacteriales.f\_\_Weeks

FDR:  $6.055e-02$   
Coefficient:  $-1.83e+02$   
Value: 80plus

1000

500

0

46-60 (n=7)

80plus (n=3)

61-80 (n=15)

31-45 (n=3)

20-30 (n=2)

Age\_category

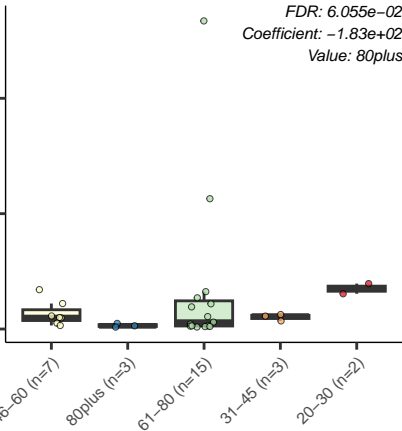

d\_Bacteria.p\_Deinococcus.Thermus.c\_Deinococci.o\_Dein

FDR:  $6.055e-02$   
Coefficient:  $-2.87e+02$   
Value: 46-60

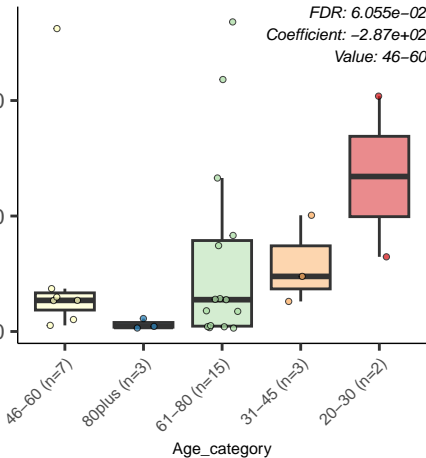

bacteria.p\_\_Deinococcus.Thermus.c\_\_Deinococci.o\_\_Deinococcales

FDR:  $6.055e-02$   
Coefficient:  $-2.87e+02$   
Value: 46-60

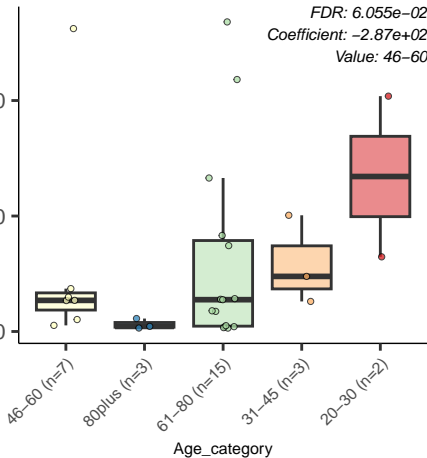

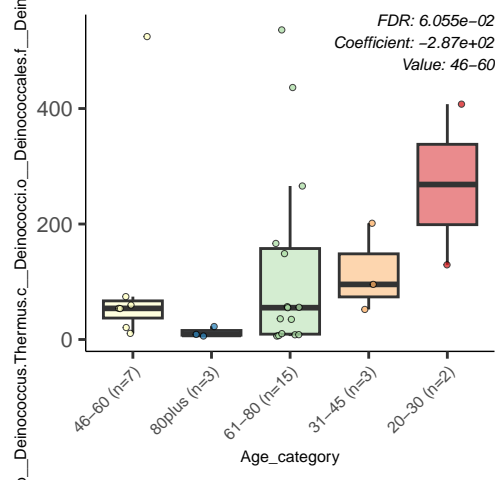

tertia.c\_\_Acidobacteriia.o\_\_Acidobacteriales.f\_\_Acidobacteriaceae.g

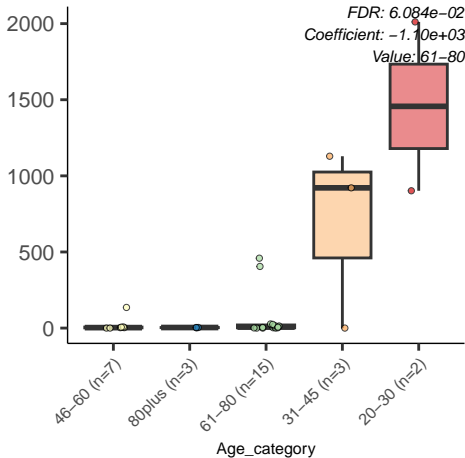

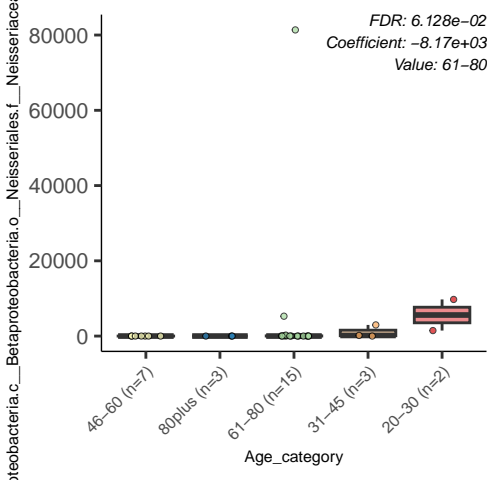



Bacteroidetes.c\_\_Bacteroidia.o\_\_Bacteroidales.f\_\_Muribaculaceae.g

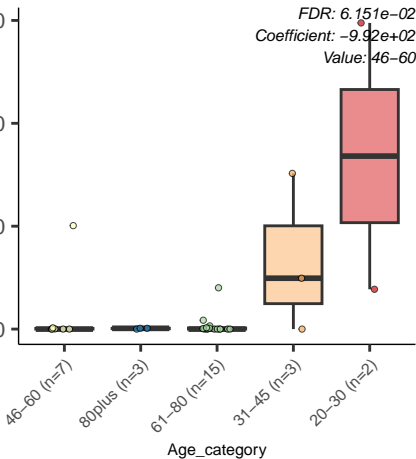

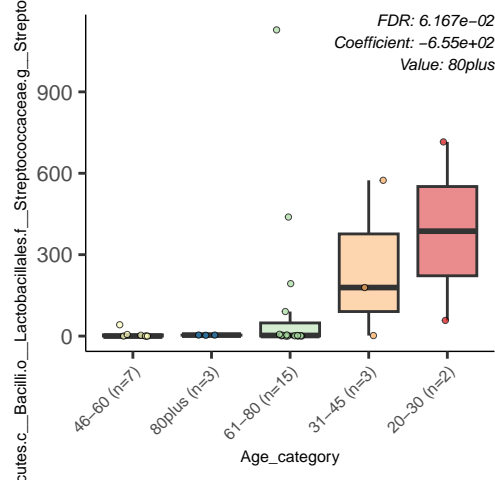

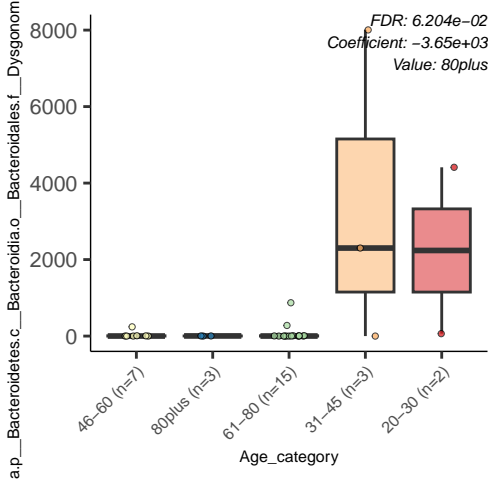

oidetes.c.c\_\_Bacteroidia.o\_\_Bacteroidales.f\_\_Dysgonomonadaceae.

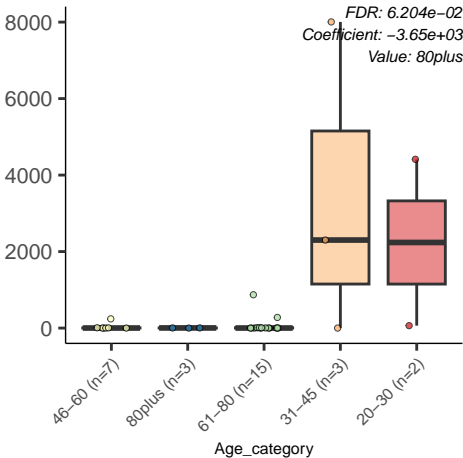

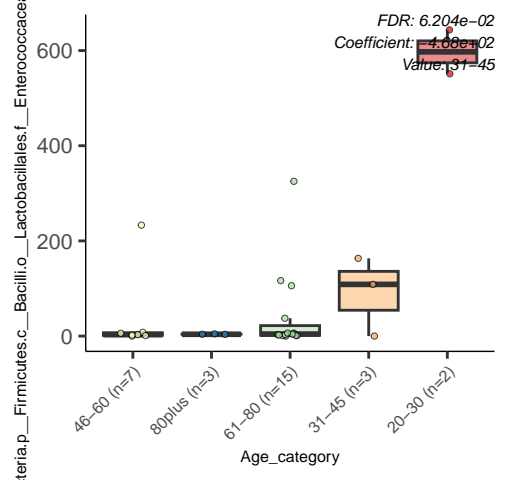

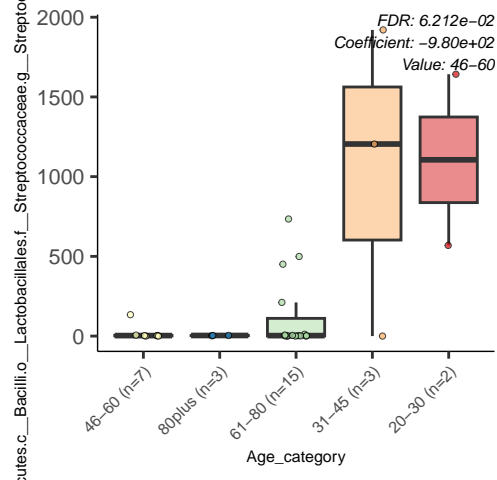

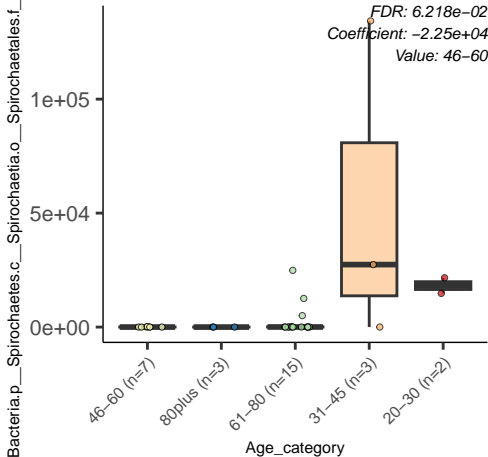

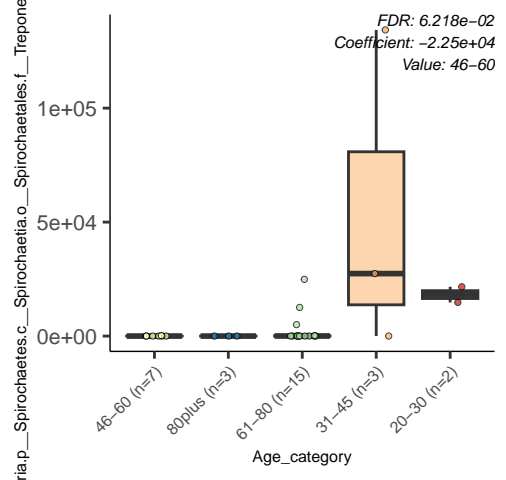



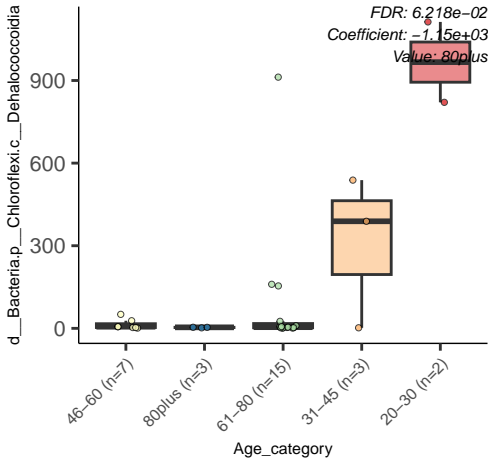

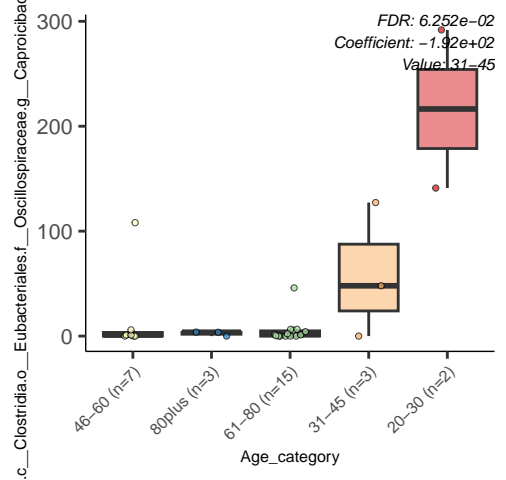

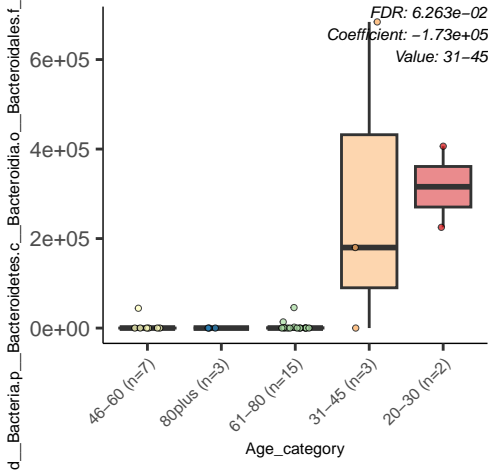

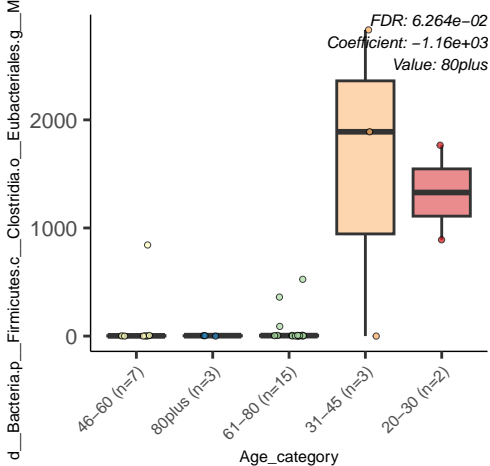

p\_\_Firmicutes.c\_\_Clostridia.o\_\_Eubacteriales.g\_\_Massilistercora.s

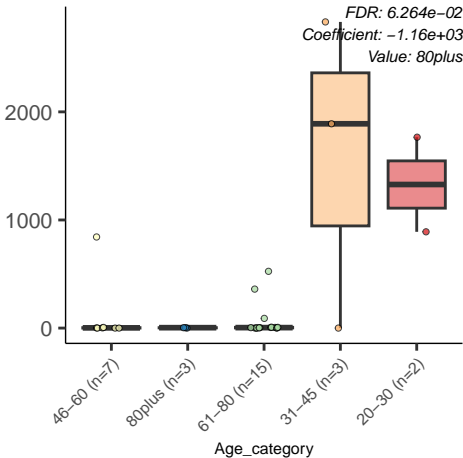

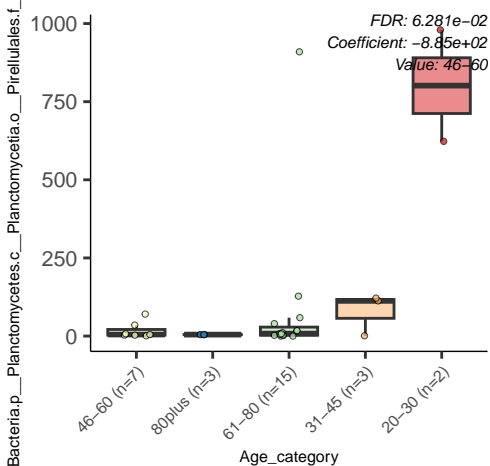

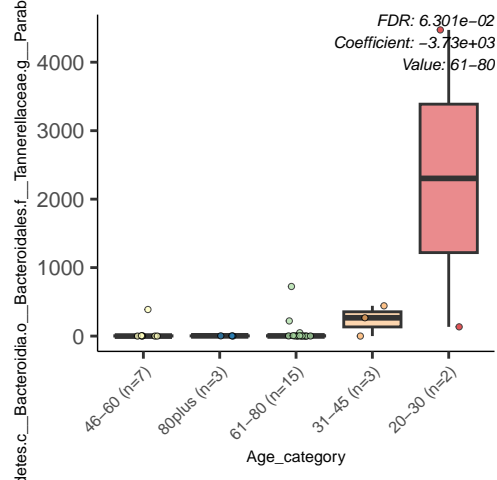

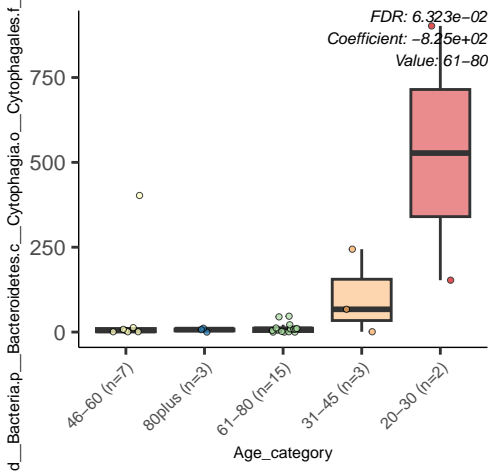



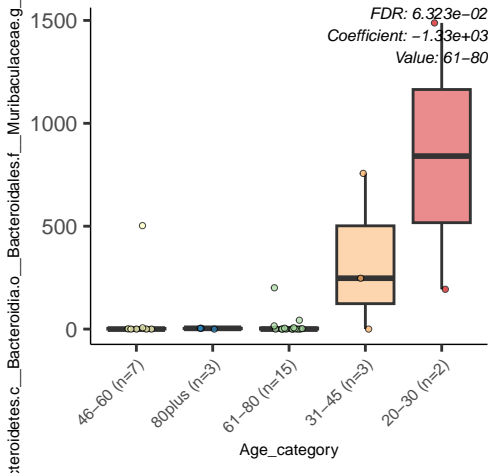

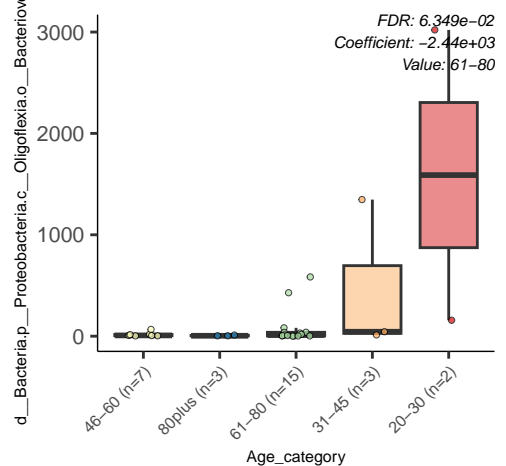

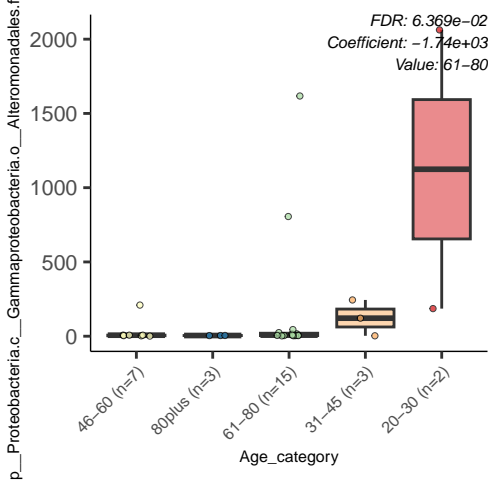

d\_\_Bacteria.p\_\_Nitrospirae

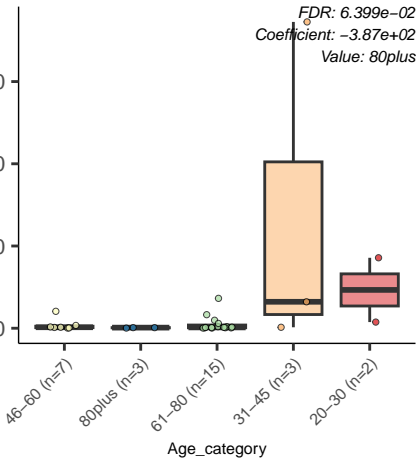

es.c\_\_Flavobacteriia.o\_\_Flavobacteriales.f\_\_Blattabacteriaceae.g

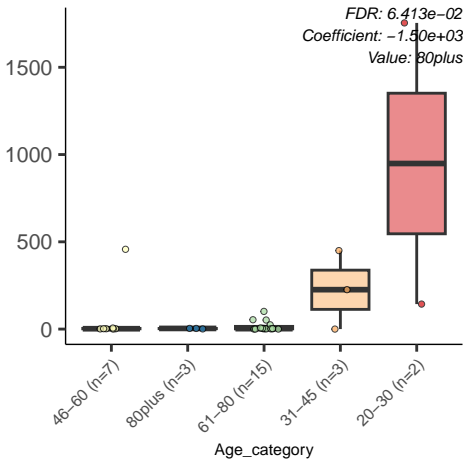

d\_Bacteria.p\_Deinococcus.Thermus.c\_Deinococci.o\_Dein

FDR:  $6.418e-02$   
Coefficient:  $-3.76e+02$   
Value: 80plus

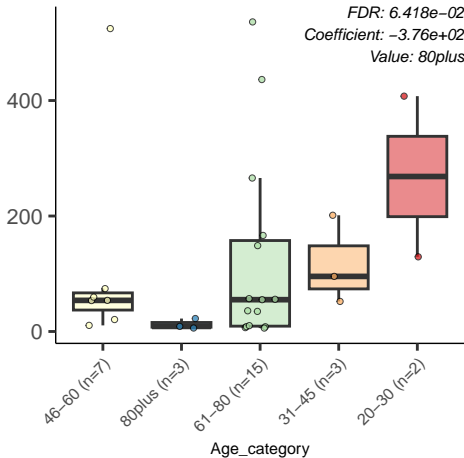

bacteria.p\_\_Deinococcus.Thermus.c\_\_Deinococci.o\_\_Deinococcales

FDR:  $6.418e-02$   
Coefficient:  $-3.76e+02$   
Value: 80plus

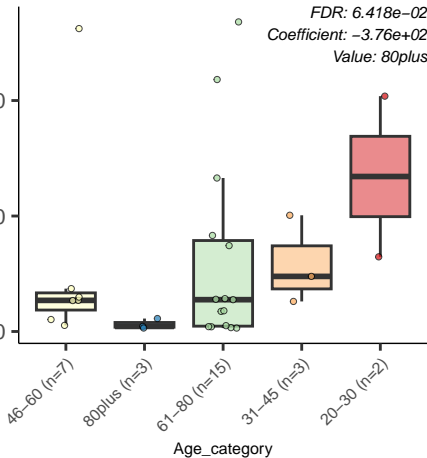

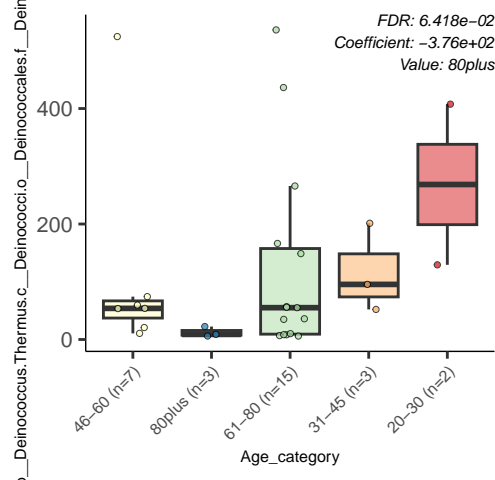



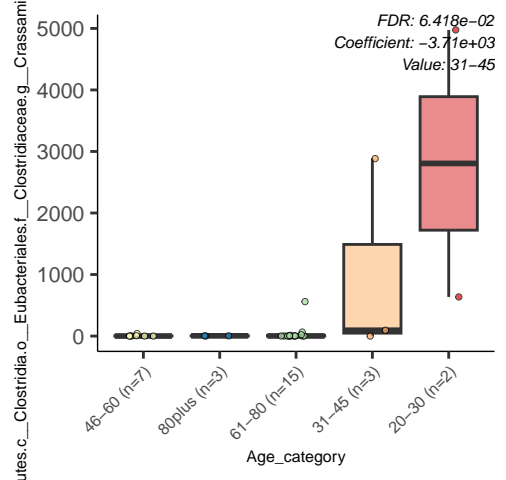

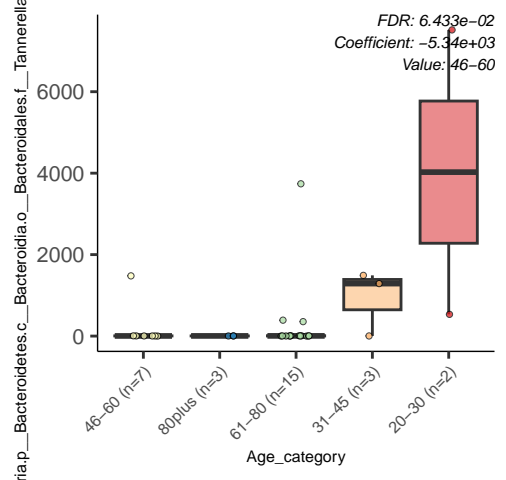

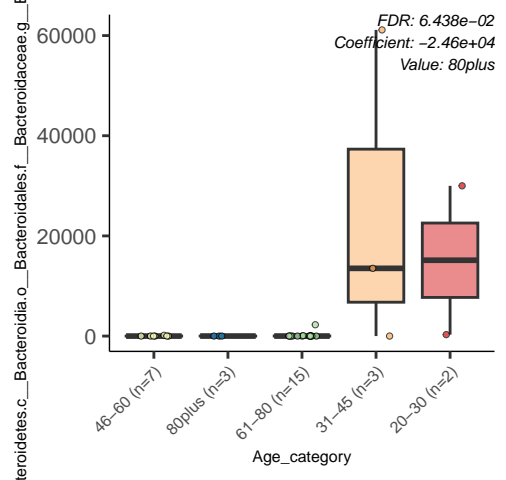

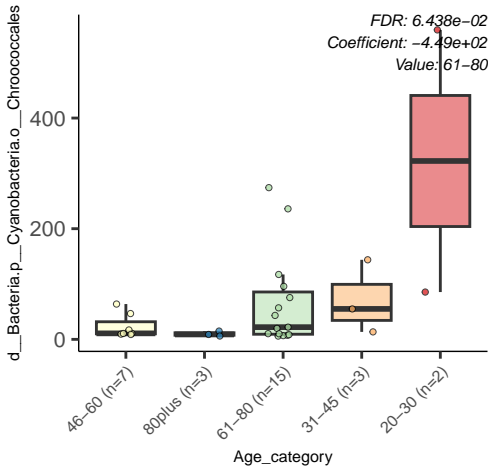

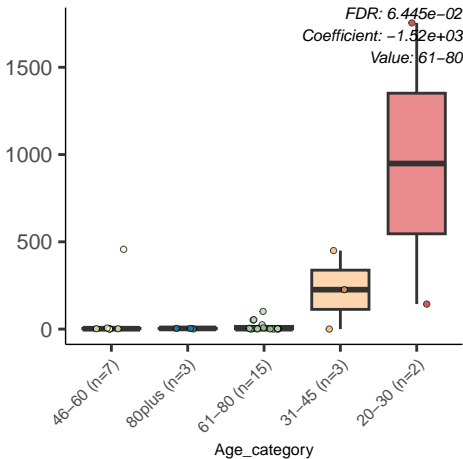

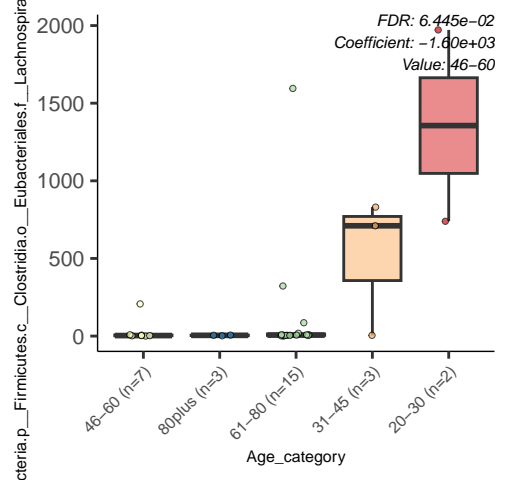

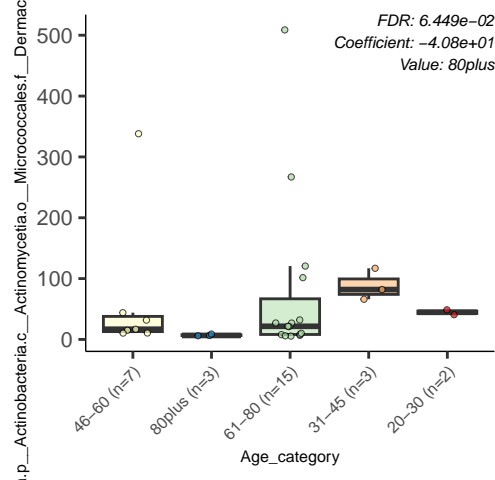

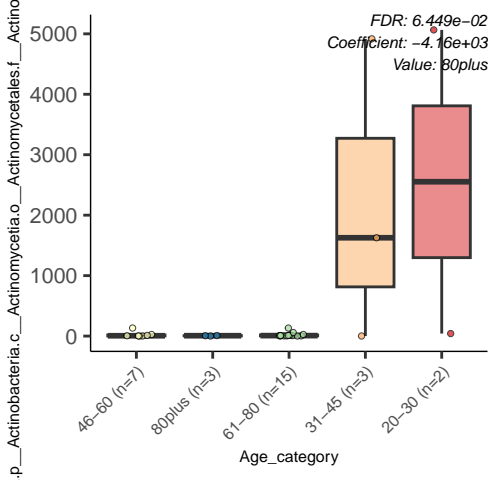



bacteria.c\_\_Actinomycetia.o\_\_Actinomycetales.f\_\_Actinomycetaceae

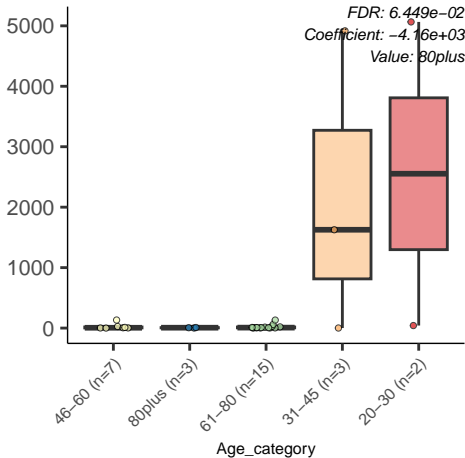

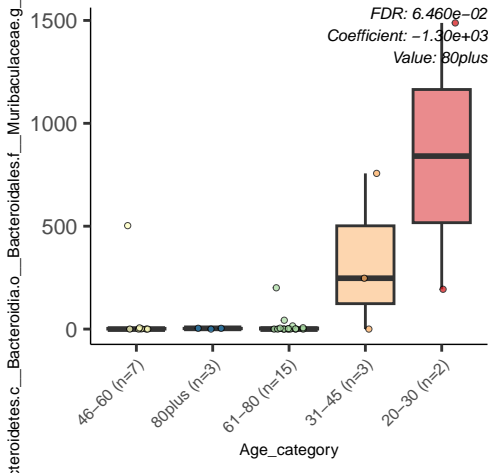

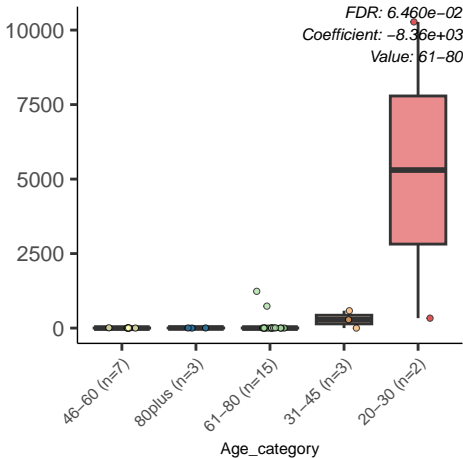

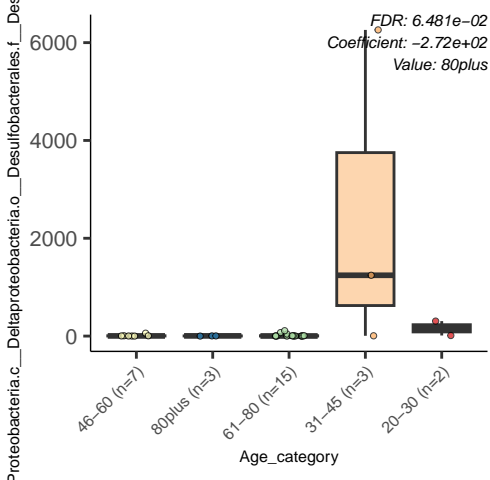

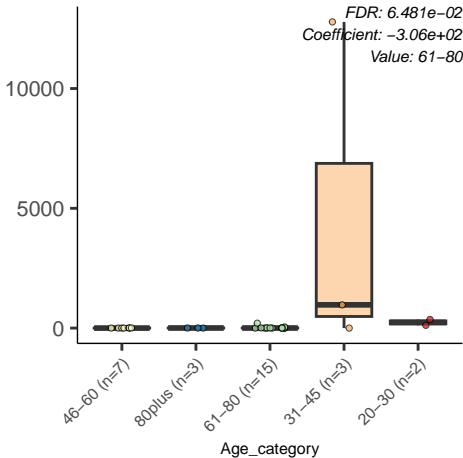

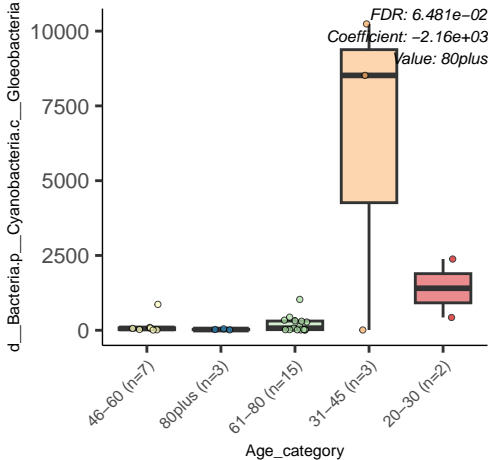

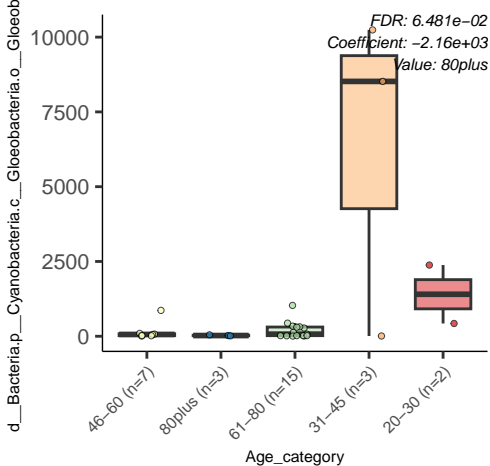

Bacteria.p\_\_Cyanobacteria.c\_\_Gloeobacteria.o\_\_Gloeobacterales.f\_\_

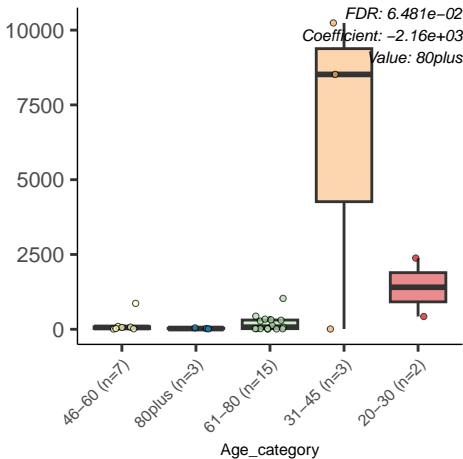



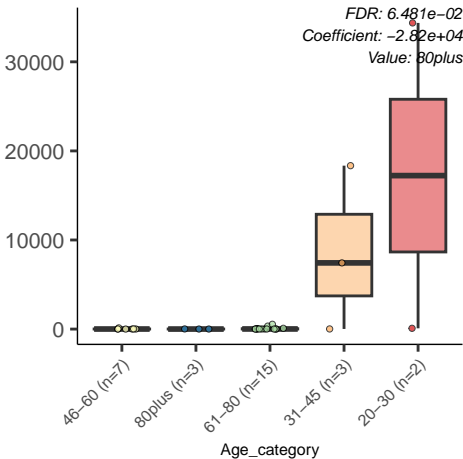

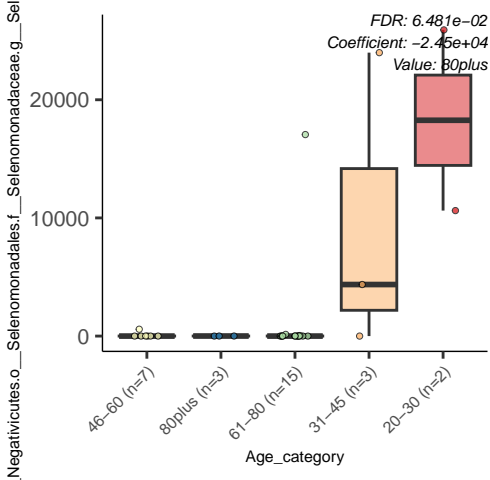

d\_\_Bacteria.p\_\_Nitrospirae

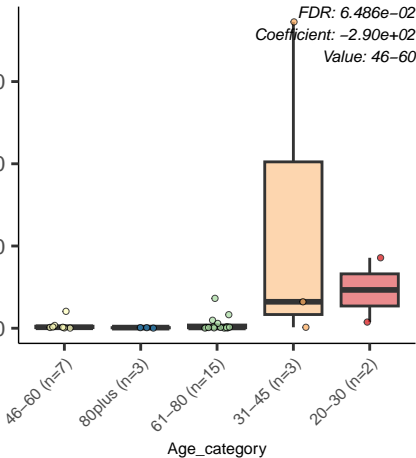

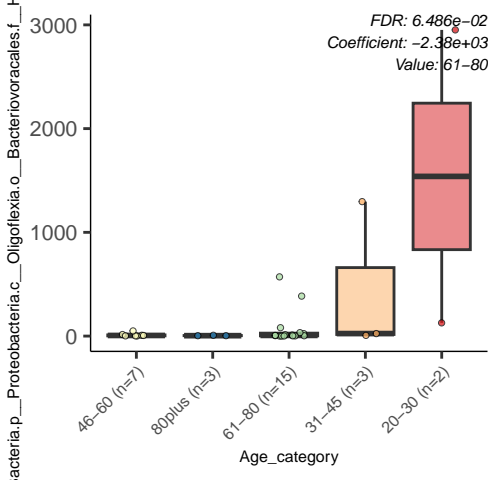

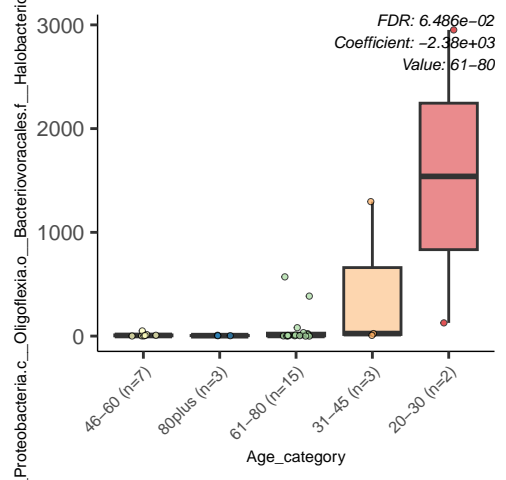

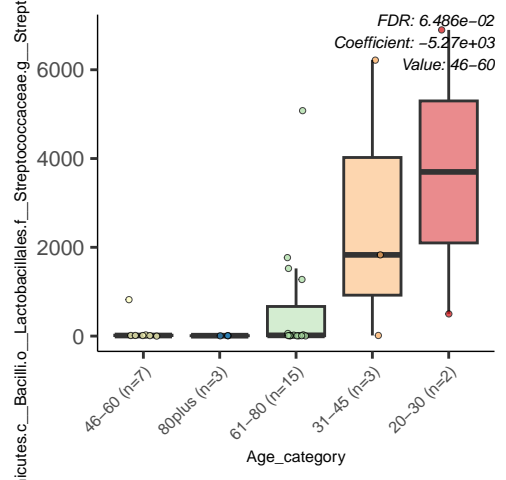

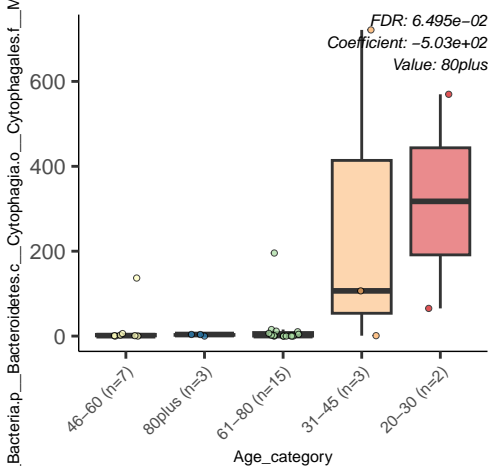

a.p\_\_Bacteroidetes.c\_\_Cytophagia.o\_\_Cytophagales.f\_\_Mangroviv

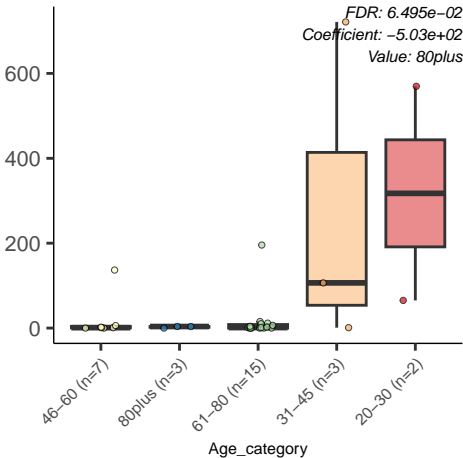



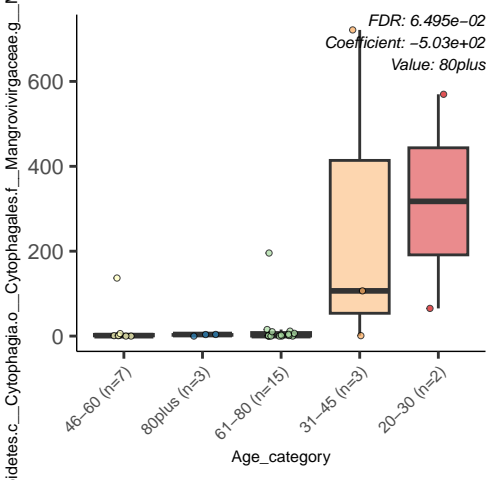

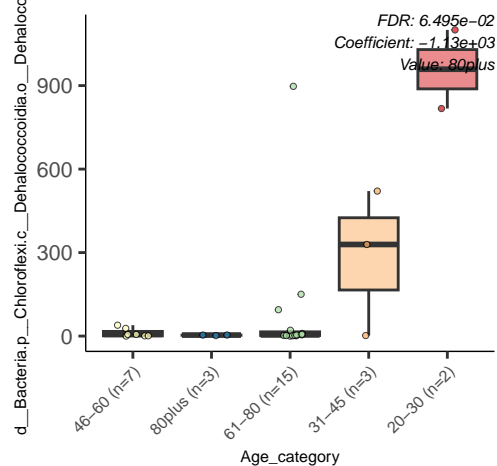

bacteria.p\_\_Chloroflexi.c\_\_Dehalococcoidia.o\_\_Dehalococcoidales.f

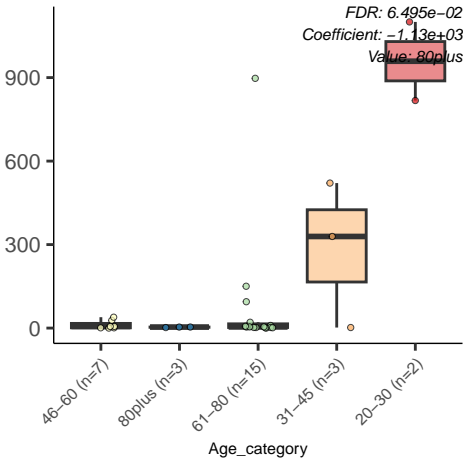

Chloroflexi.c\_\_Dehalococcoidia.o\_\_Dehalococcoidales.f\_\_Dehaloco

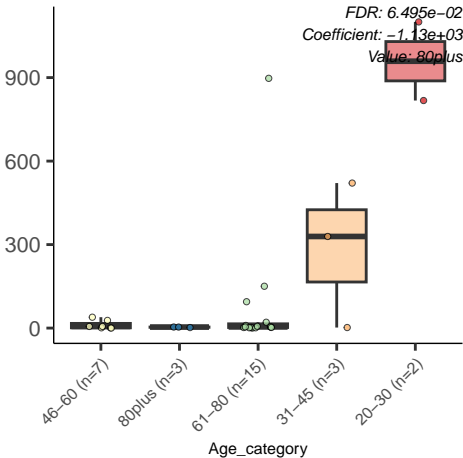

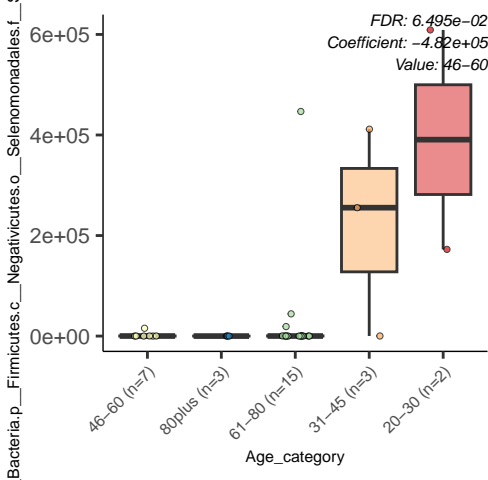

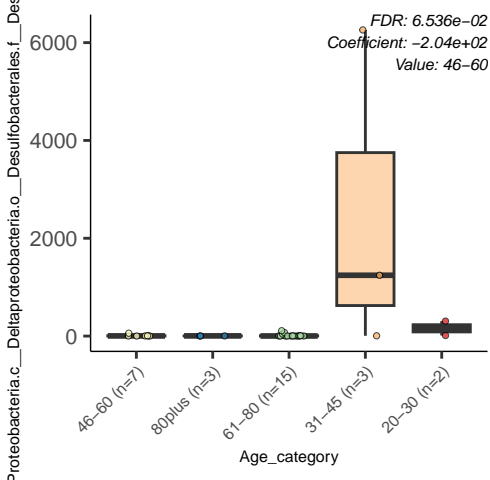

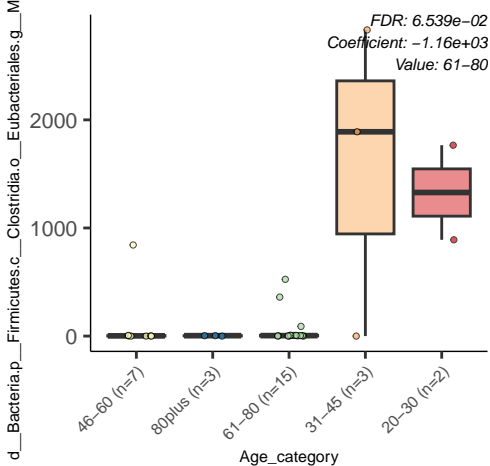

p\_\_Firmicutes.c\_\_Clostridia.o\_\_Eubacteriales.g\_\_Massilistercora.s

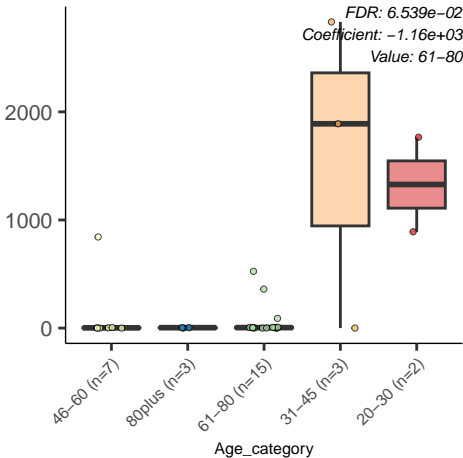



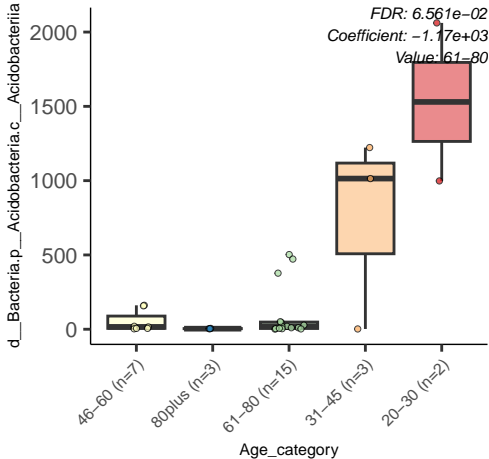

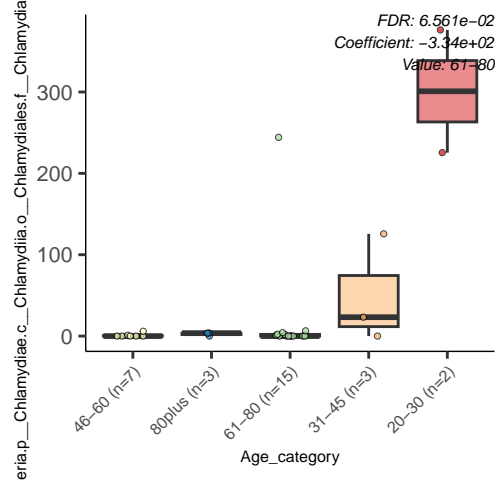

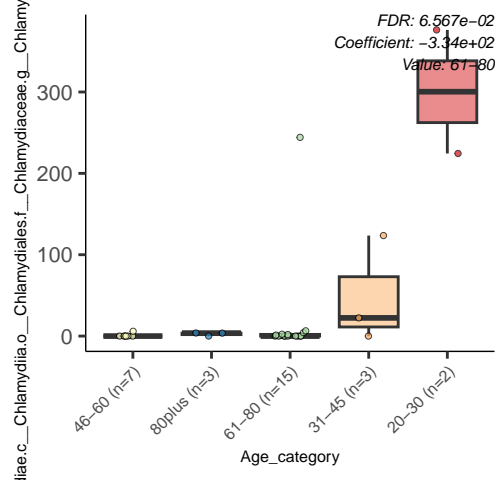

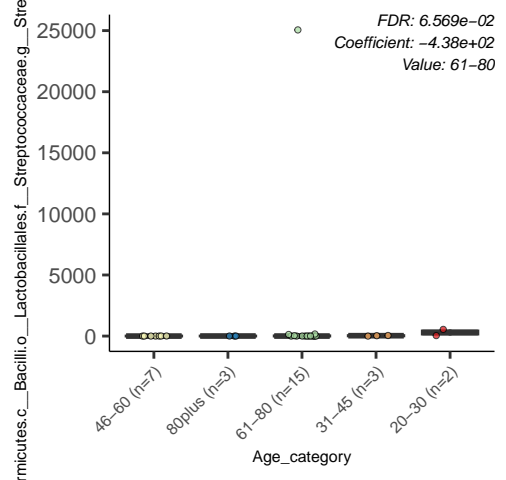

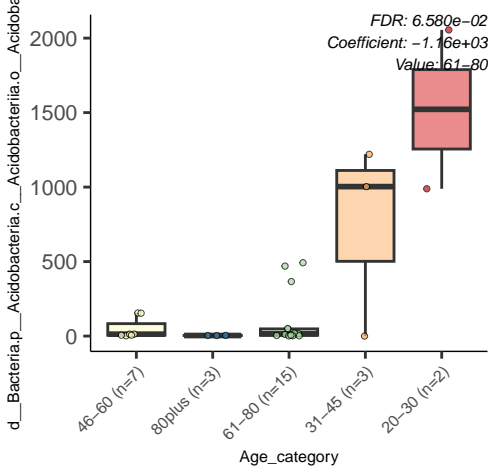

Bacteria.p\_\_Acidobacteria.c\_\_Acidobacteriia.o\_\_Acidobacteriales.f\_\_

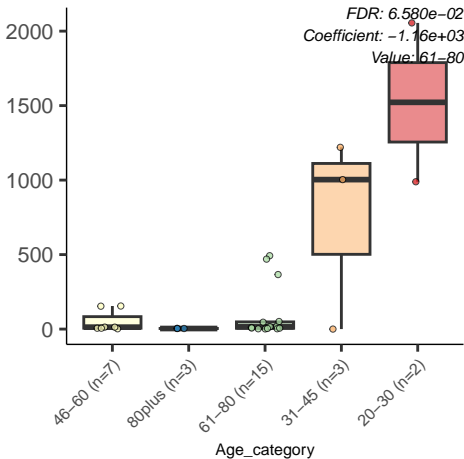

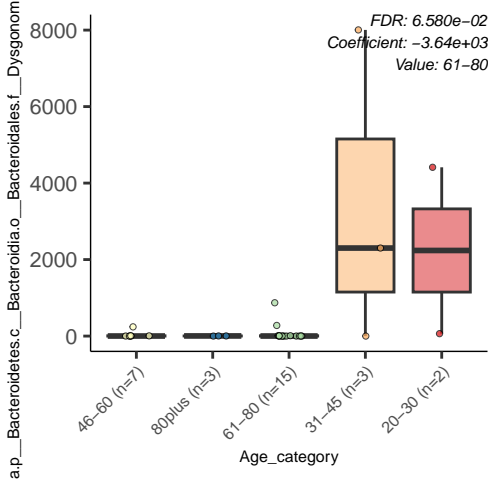

oidetes.c\_\_Bacteroidia.o\_\_Bacteroidales.f\_\_Dysgonomonadaceae.g\_\_

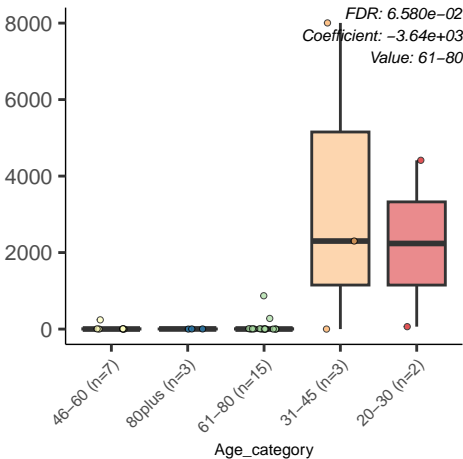



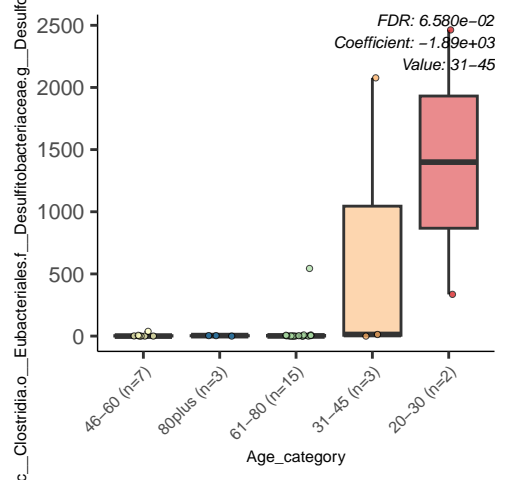

c\_\_Clostridia.o\_\_Eubacteriales.f\_\_Eubacteriales.Family.XIII..Incerta

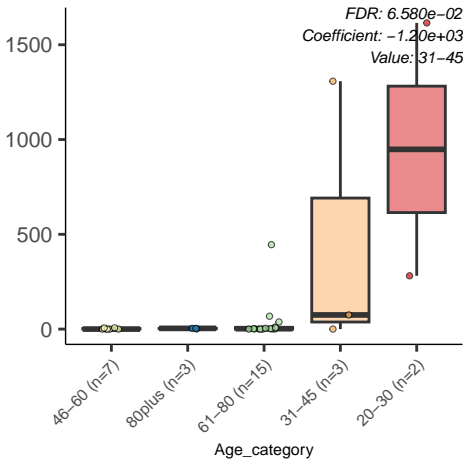

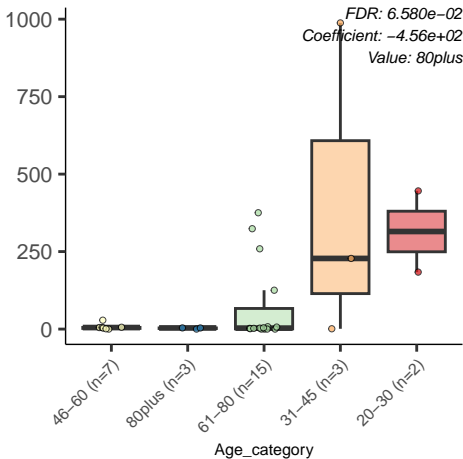

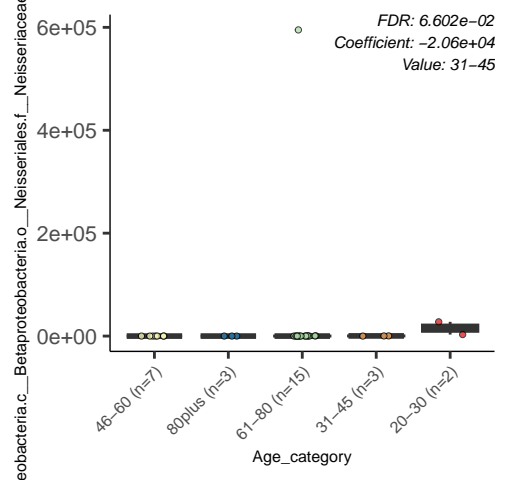

teria.p\_\_Proteobacteria.c\_\_Deltaproteobacteria.o\_\_Desulfobactera

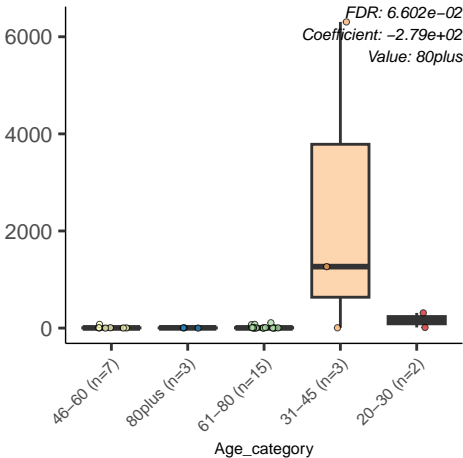

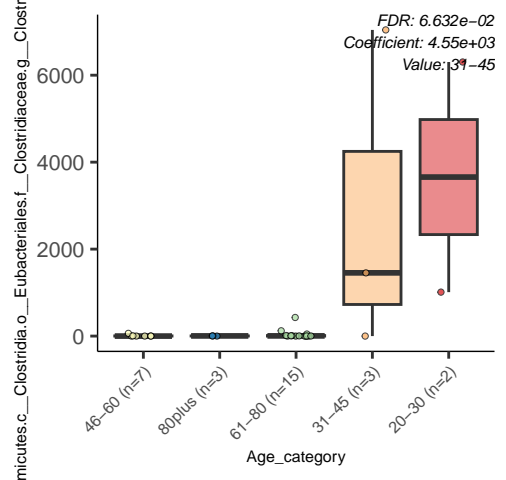

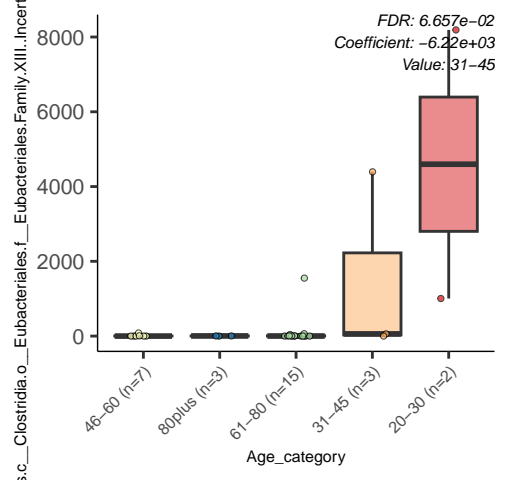

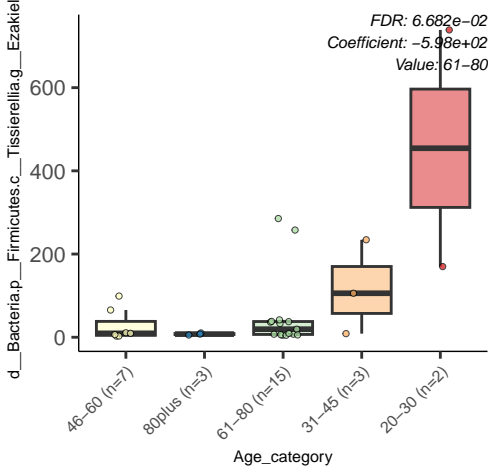



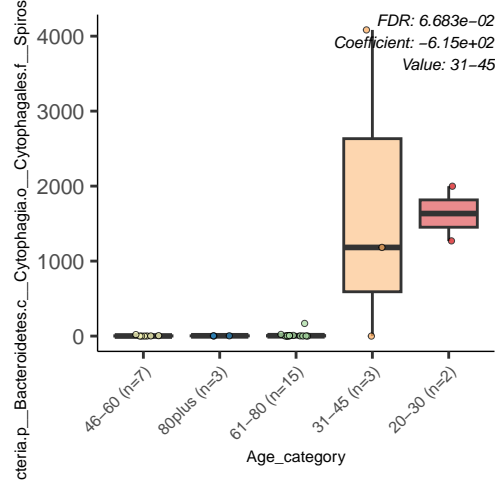

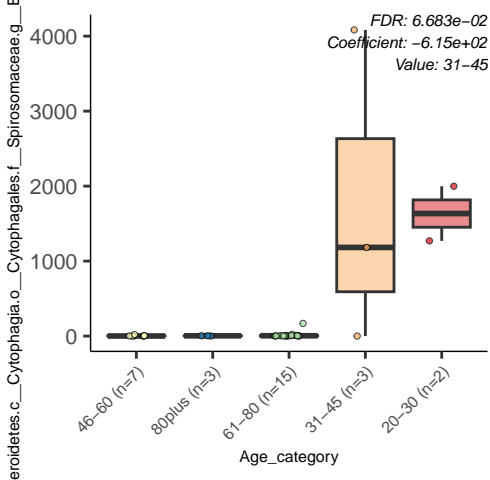

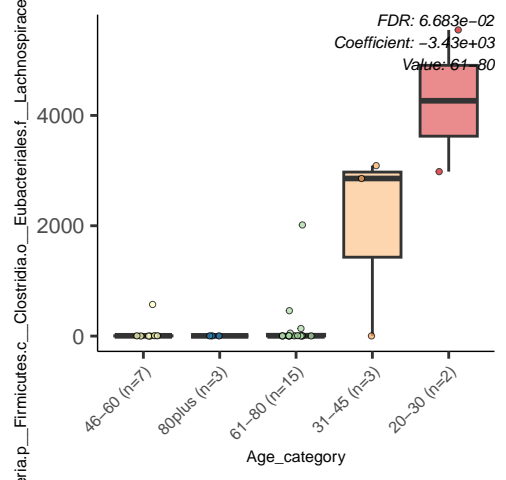

micutes.c\_\_Clostridia.o\_\_Eubacteriales.f\_\_Lachnospiraceae.g\_\_Bu

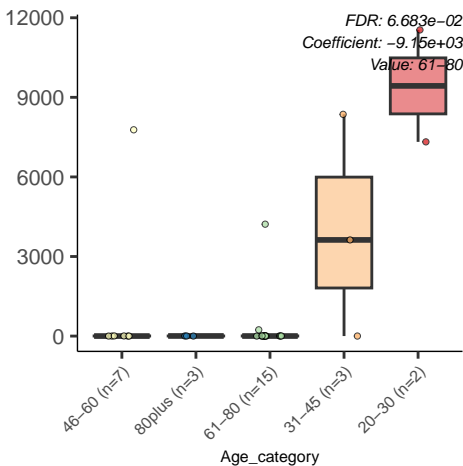

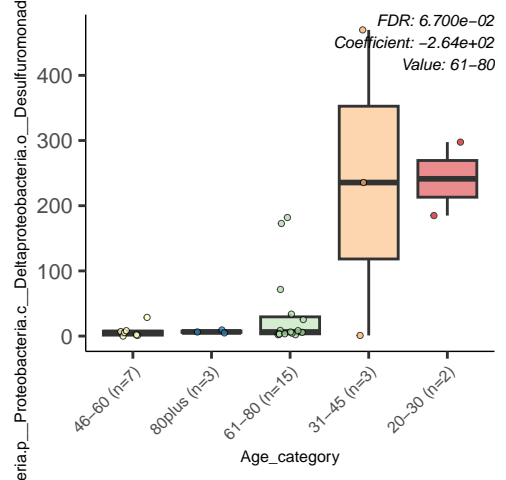

detes.c\_\_Flavobacteriia.o\_\_Flavobacteriales.f\_\_Flavobacteriaceae.g

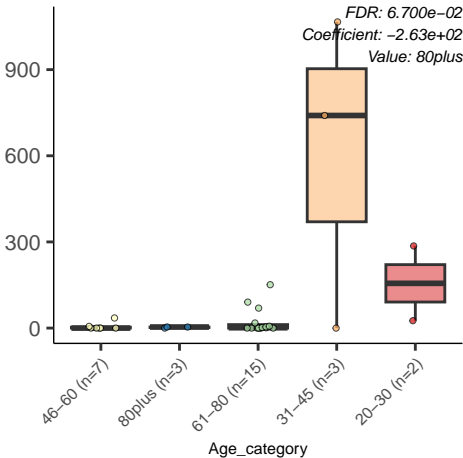

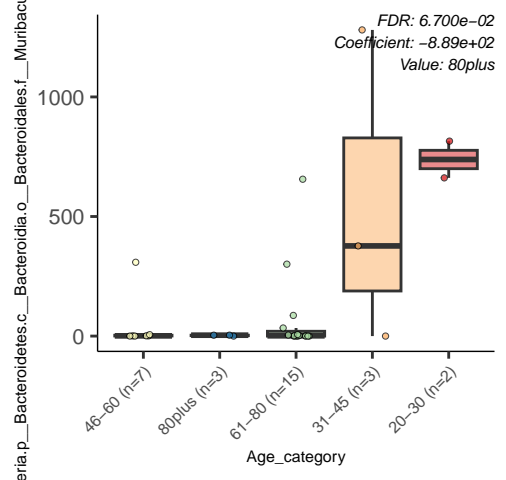

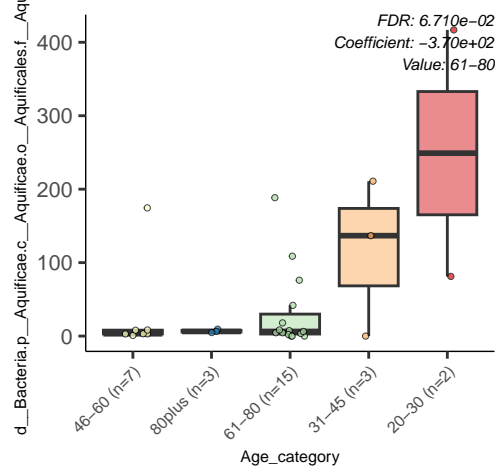



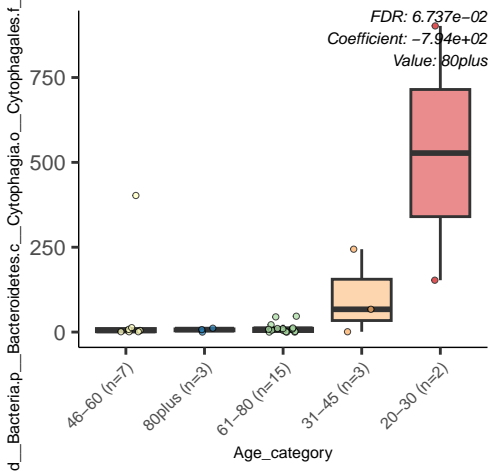

bacteria.p\_\_Firmicutes.c\_\_Clostridia.o\_\_Eubacteriales.f\_\_Oscillospira

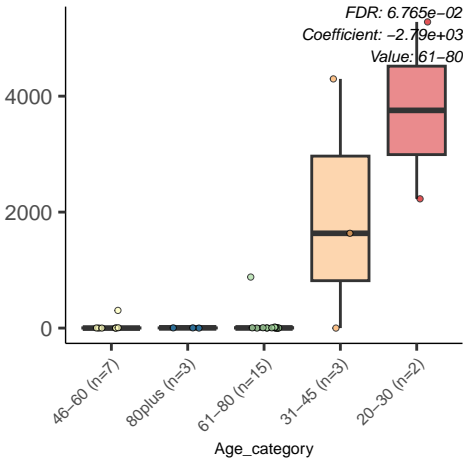

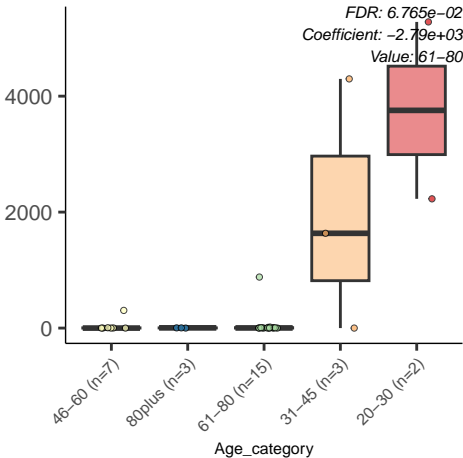

Neisseriaceae

FDR:  $6.779e-02$   
Coefficient:  $-5.75e+02$   
Value: 61-80

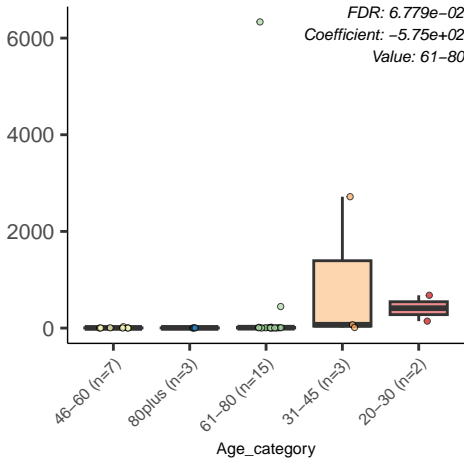

teroidetes.c\_\_Cytophagia.o\_\_Cytophagales.f\_\_Cytophagaceae.g

FDR: 6.779e-02  
Coefficient: -2.41e+02  
Value: 61-80

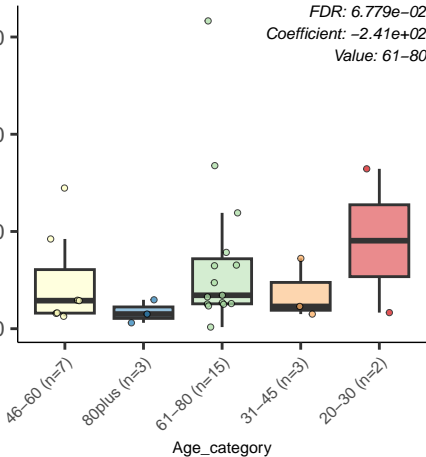

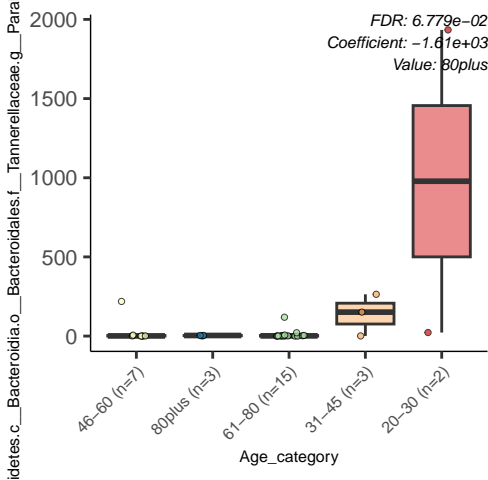

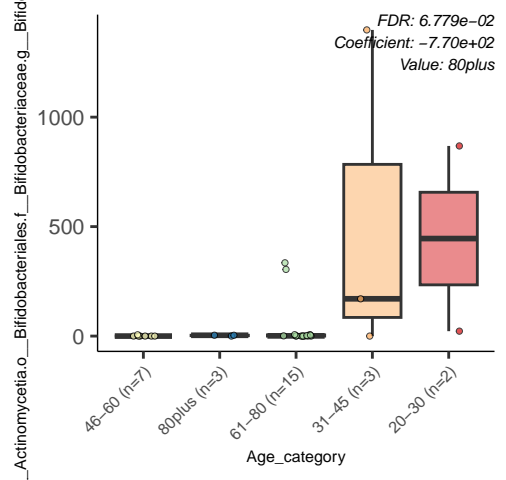

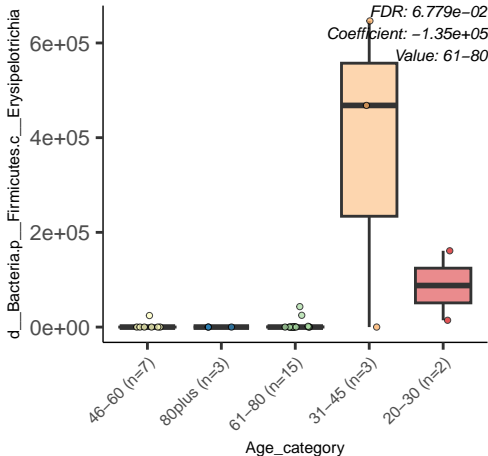



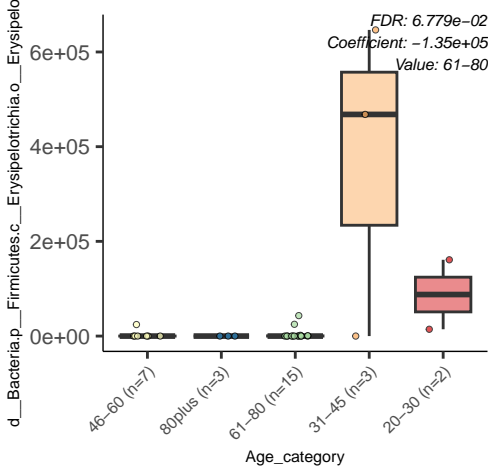

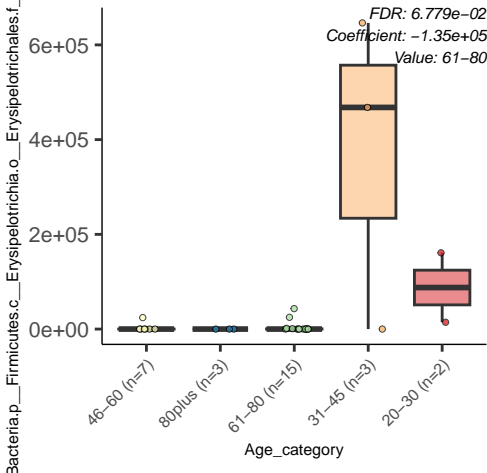

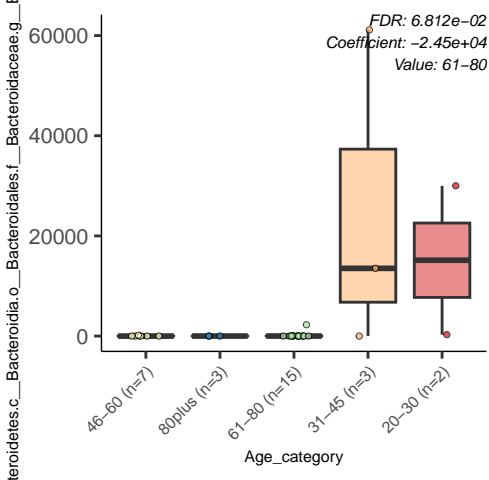

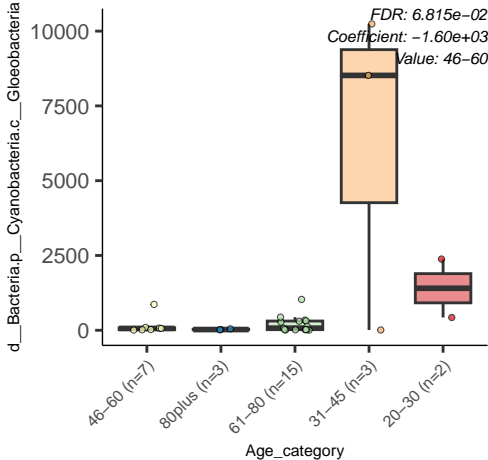

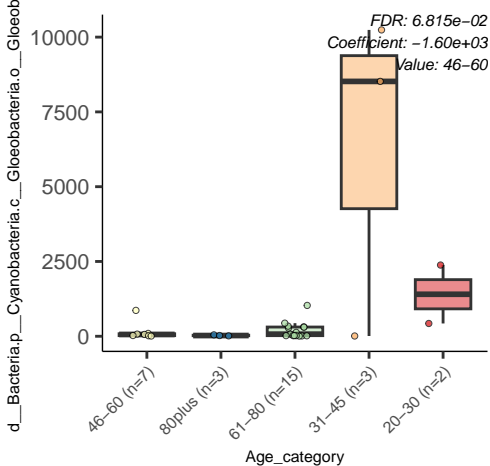

Bacteria.p\_\_Cyanobacteria.c\_\_Gloeobacteria.o\_\_Gloeobacterales.f

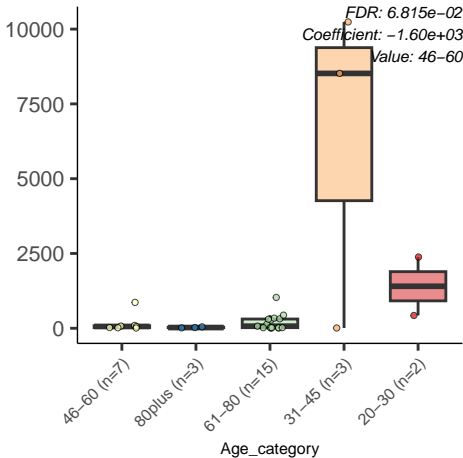

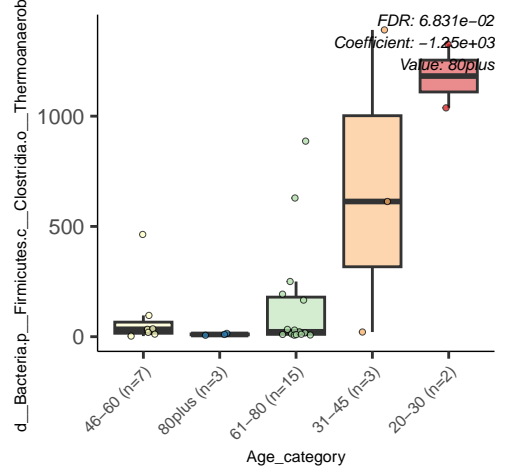

micutes.c\_\_Clostridia.o\_\_Eubacteriales.f\_\_Lachnospiraceae.g\_\_Bu

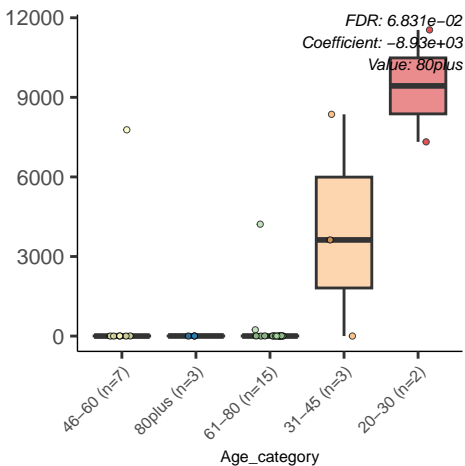



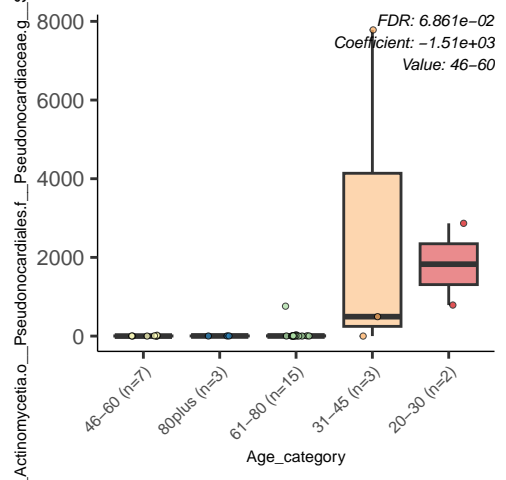

bacteria.p\_\_Firmicutes.c\_\_Clostridia.o\_\_Eubacteriales.f\_\_Lachnospir

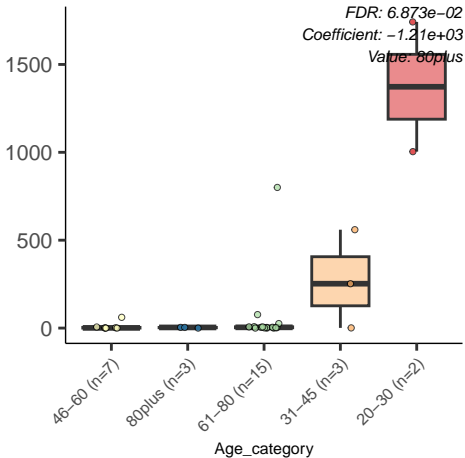

micutes.c\_\_Clostridia.o\_\_Eubacteriales.f\_\_Lachnospiraceae.g\_\_Se

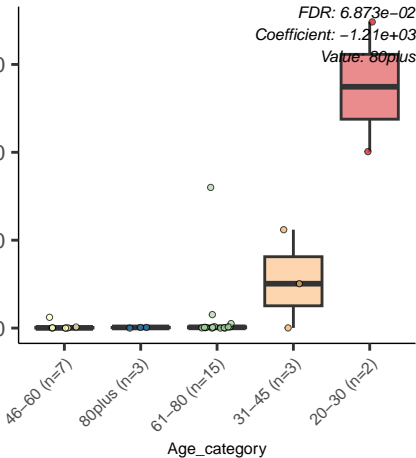

d\_Bacteria.p\_\_Cyanobacteria

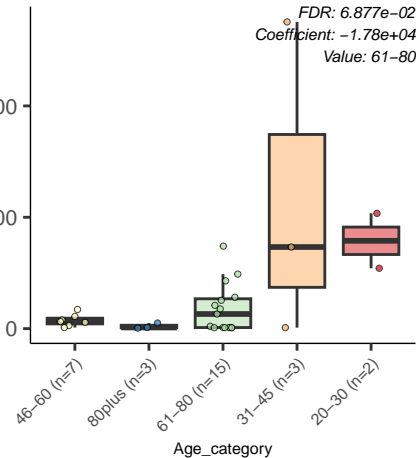

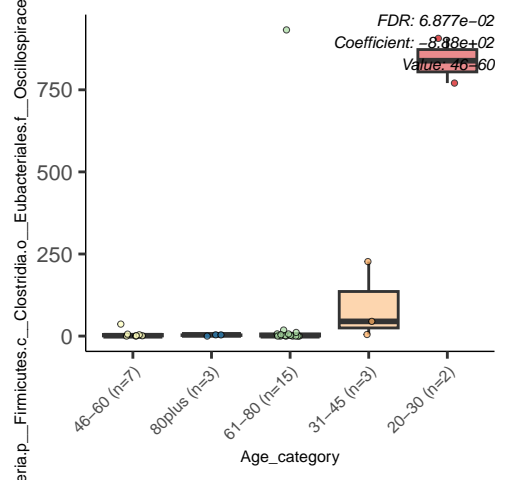

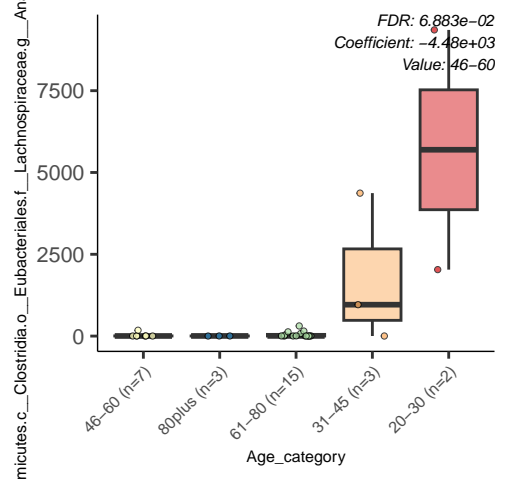

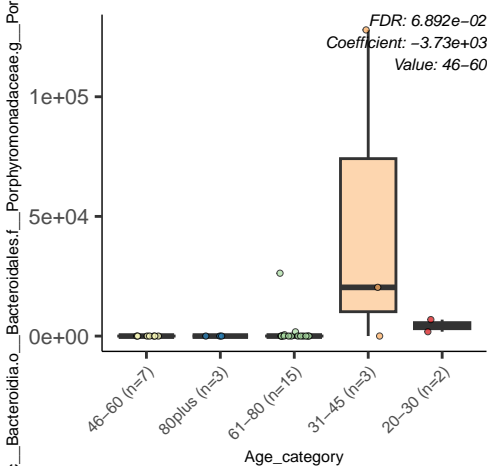

Actinomycetia.o\_\_Corynebacteriales.f\_\_Corynebacteriaceae.g\_\_C

FDR:  $6.908e-02$   
Coefficient:  $4.74e+03$   
Value: 61-80

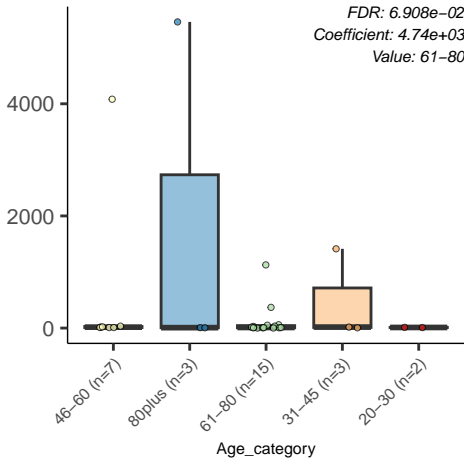



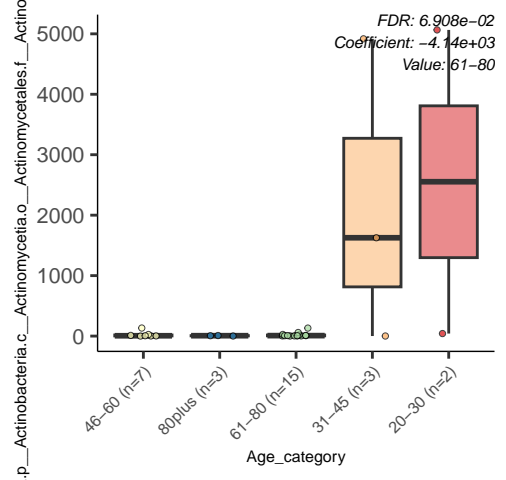

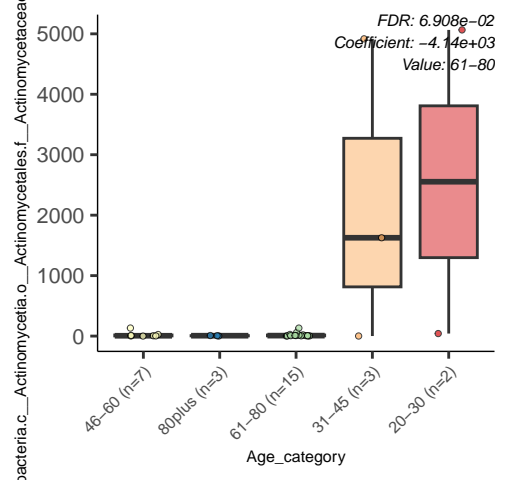

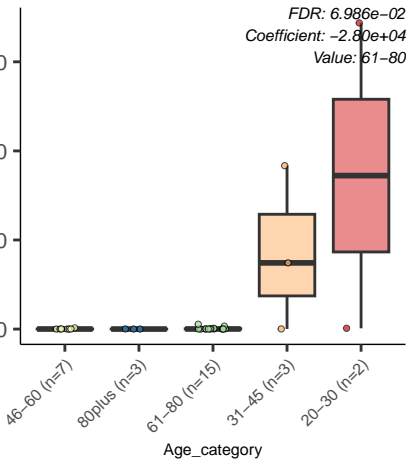

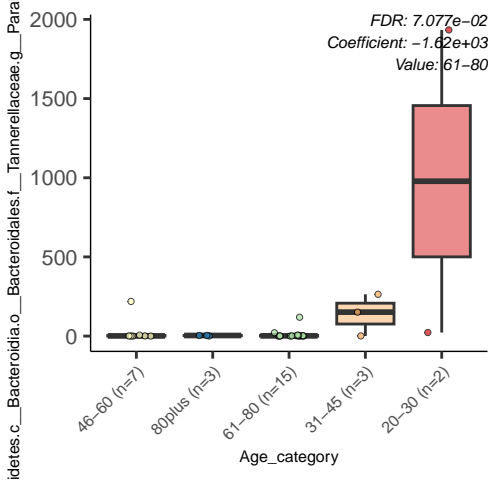

teria.p\_\_Proteobacteria.c\_\_Deltaproteobacteria.o\_\_Desulfobactera

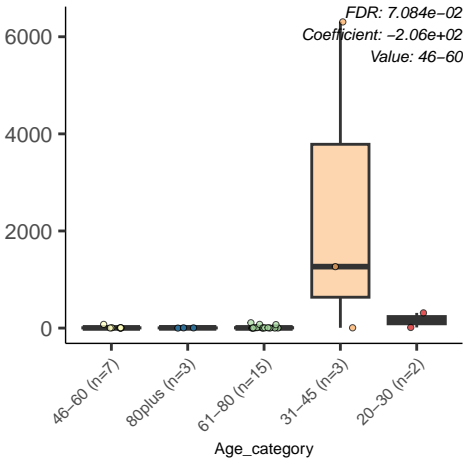

Bacteroidetes.c\_\_Bacteroidia.o\_\_Bacteroidales.f\_\_Prevotellaceae.g

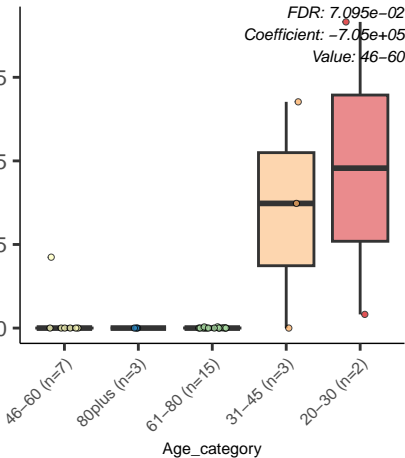

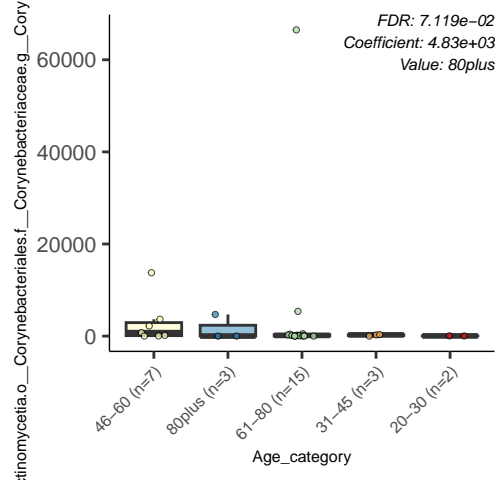

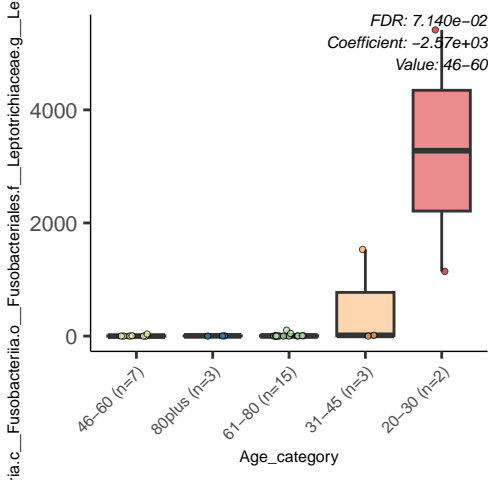



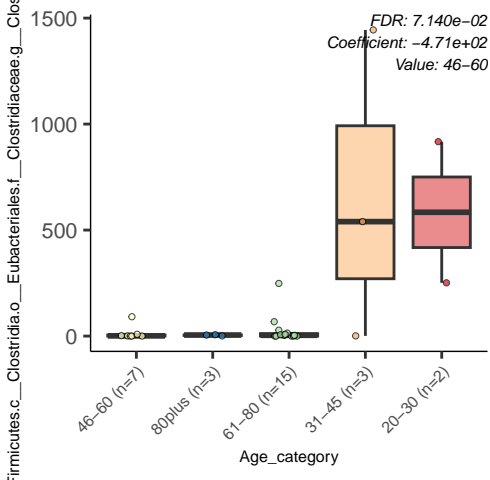

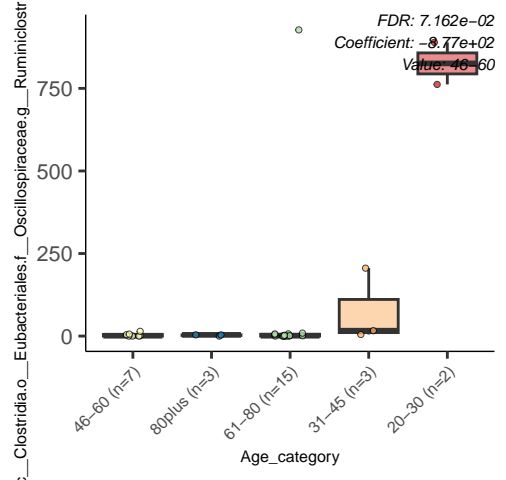

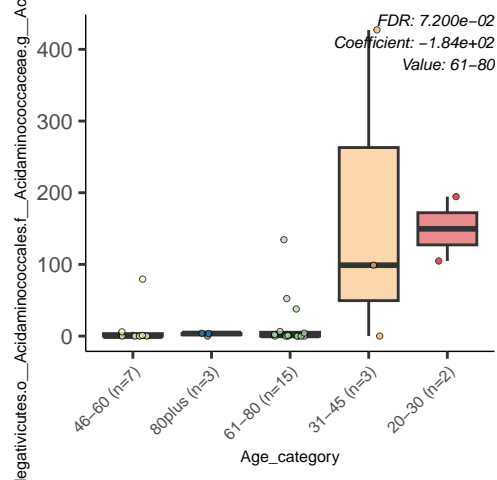

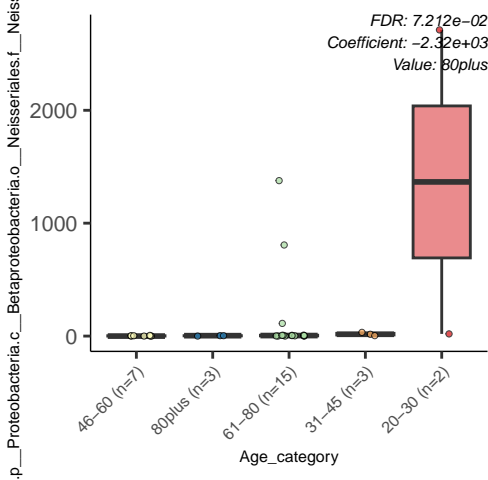

bacteria.c\_\_Betaproteobacteria.o\_\_Neisseriales.f\_\_Neisseriaceae.g

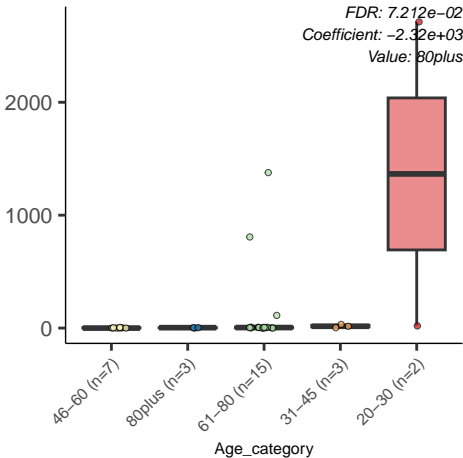

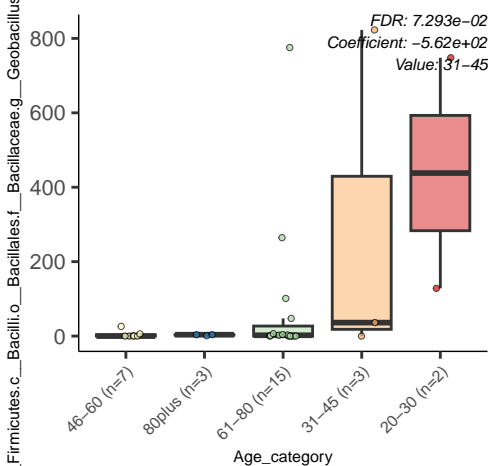

Bacteroidetes.c\_\_Bacteroidia.o\_\_Bacteroidales.f\_\_Prevotellaceae.g

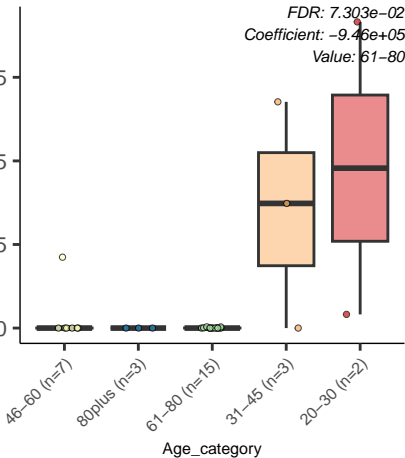

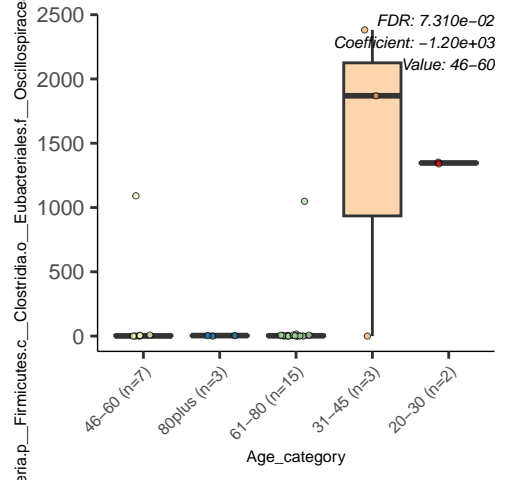



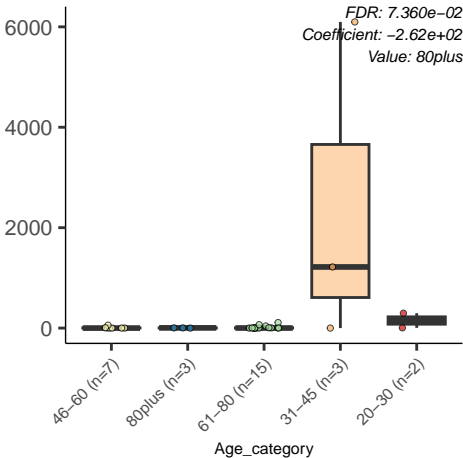

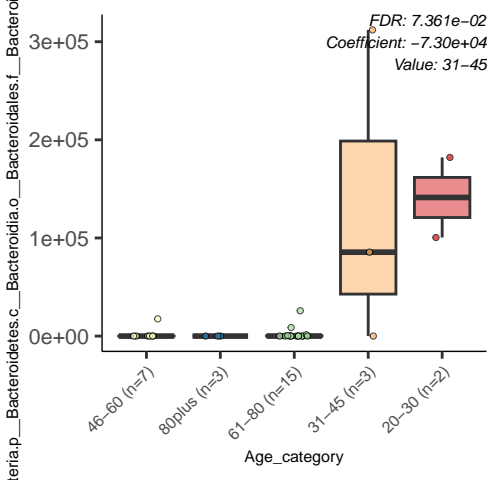

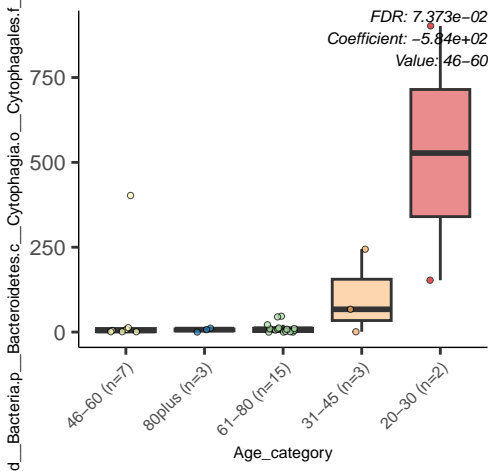

o\_\_Firmicutes.c\_\_Erysipelotrichia.o\_\_Erysipelotrichales.f\_\_Erysipel

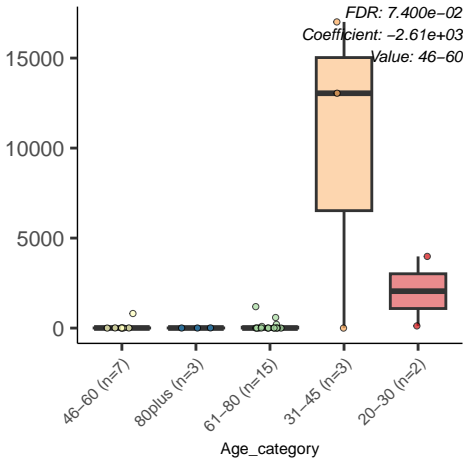

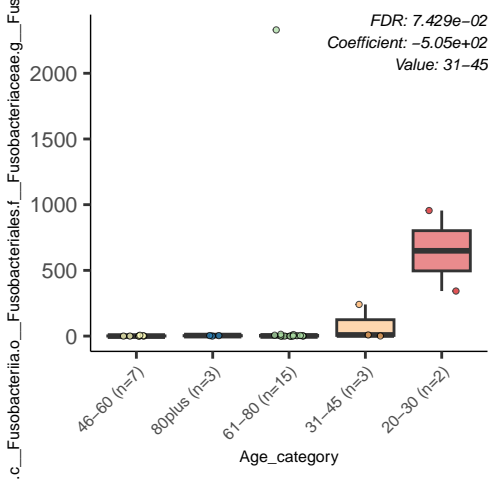

Bacteroidetes.c\_\_Bacteroidia.o\_\_Bacteroidales.f\_\_Prevotellaceae.g

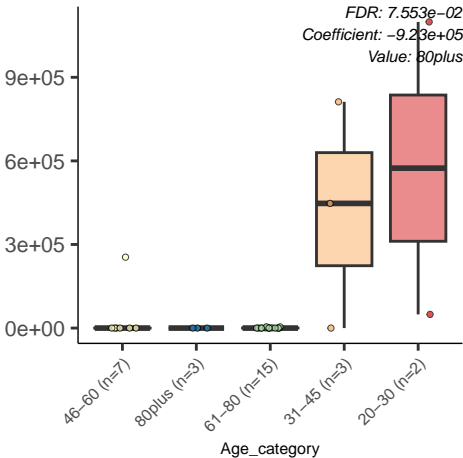

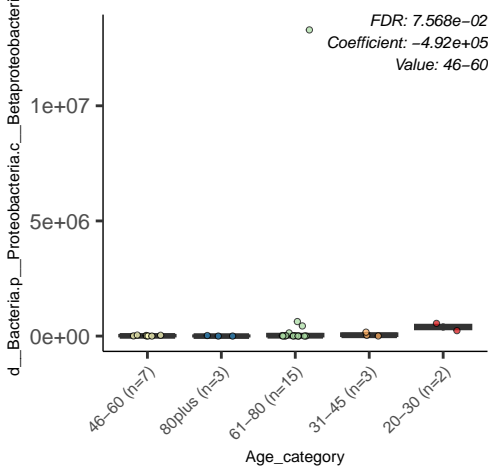

\_\_Bacteroidetes.c\_\_Flavobacteriia.o\_\_Flavobacteriales.f\_\_Flavoba

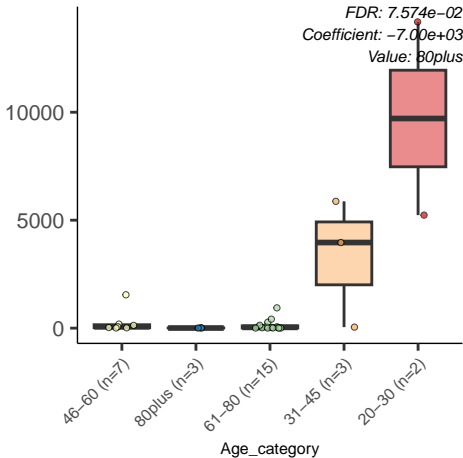



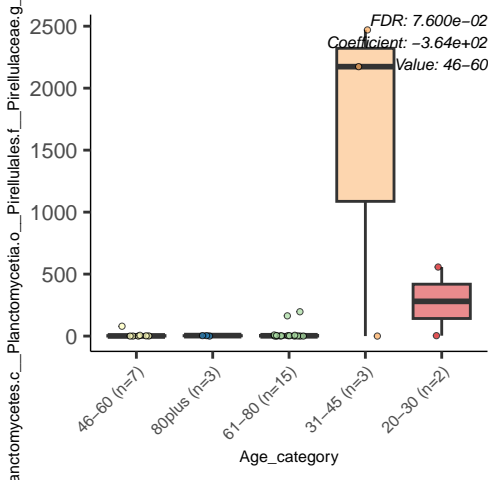

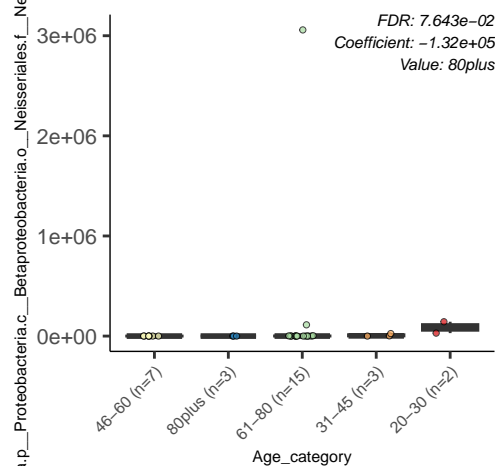

p\_\_Bacteroidetes.c\_\_Chitinophagia.o\_\_Chitinophagales.f\_\_Chitinop

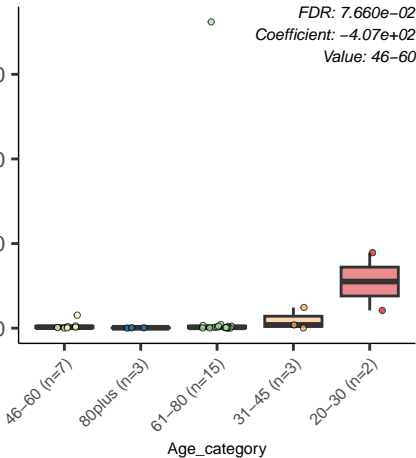

ia.c\_\_Deltaproteobacteria.o\_\_Desulfobacterales.f\_\_Desulfobulbace

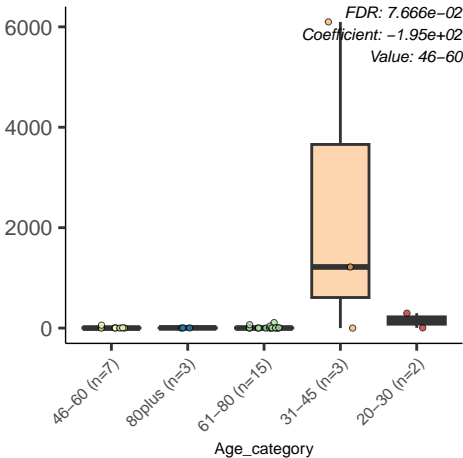

o\_\_Firmicutes.c\_\_Erysipelotrichia.o\_\_Erysipelotrichales.f\_\_Erysipel

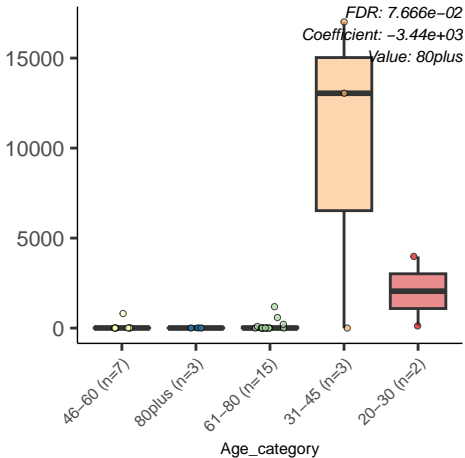

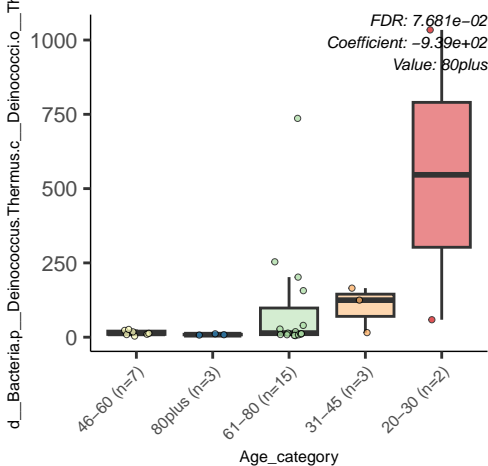

l\_Bacteria.p\_Deinococcus.Thermus.c\_Deinococci.o\_Thermales

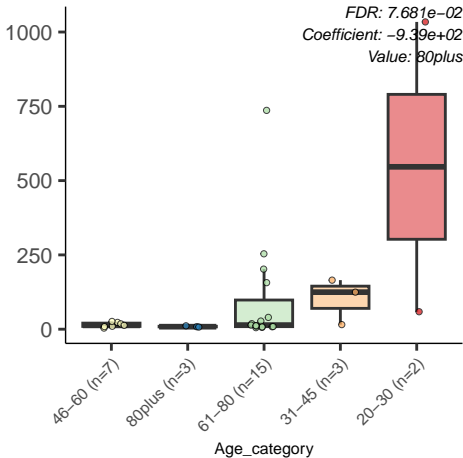

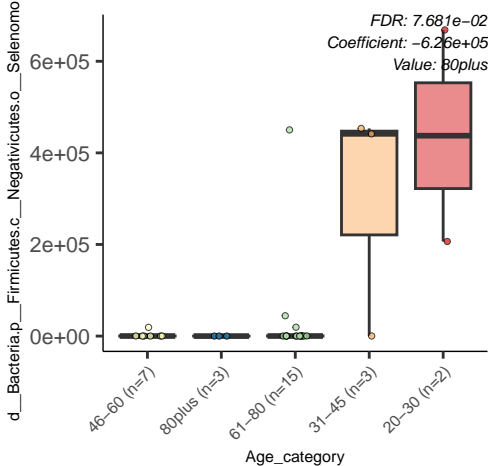



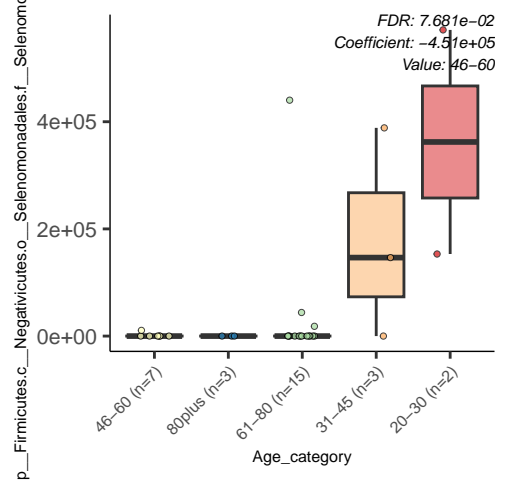

d\_\_Bacteria.p\_\_Nitrospirae.c\_\_Nitrospira

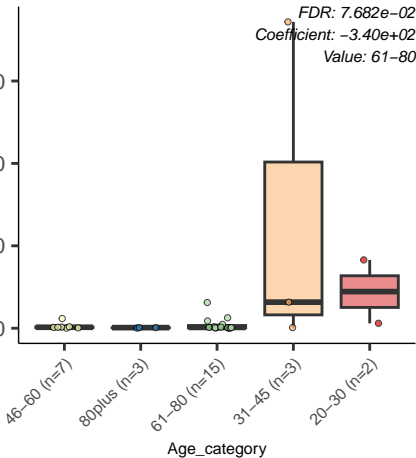

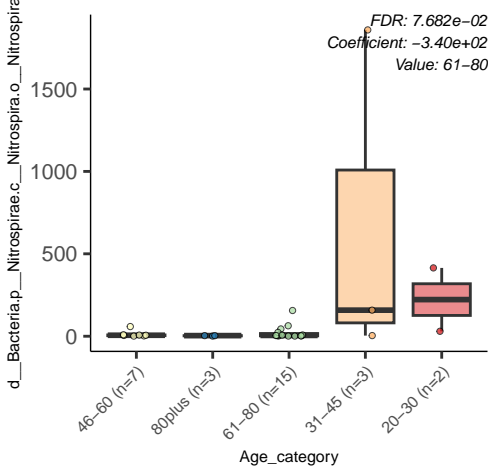

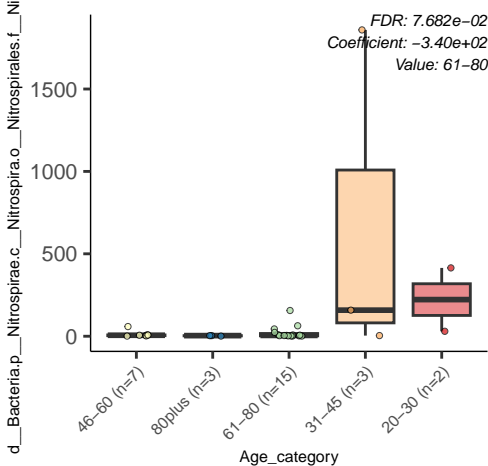

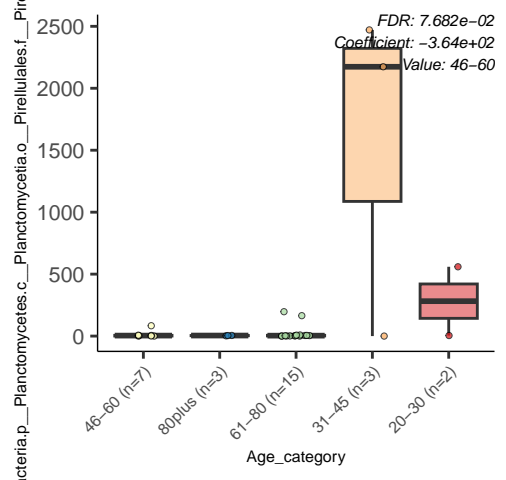

d\_\_Bacteria.p\_\_Deinococcus.Thermus

FDR:  $7.682e-02$   
Coefficient:  $-1.42e+03$   
Value: 61-80

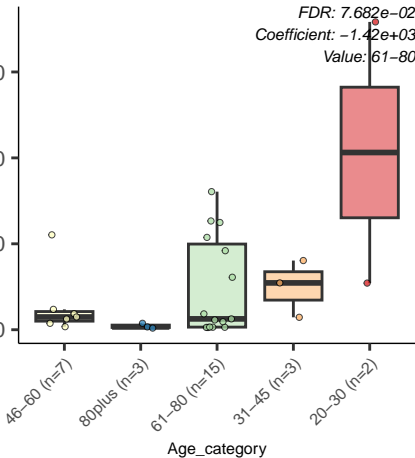

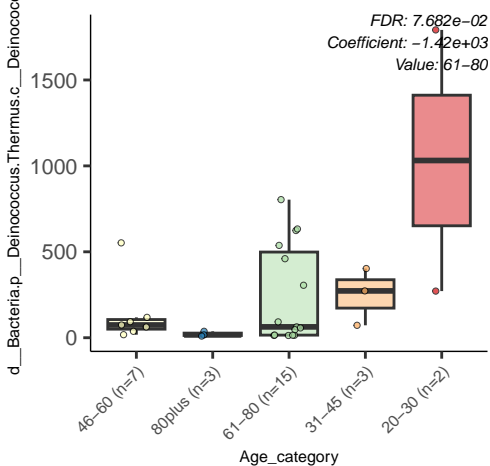

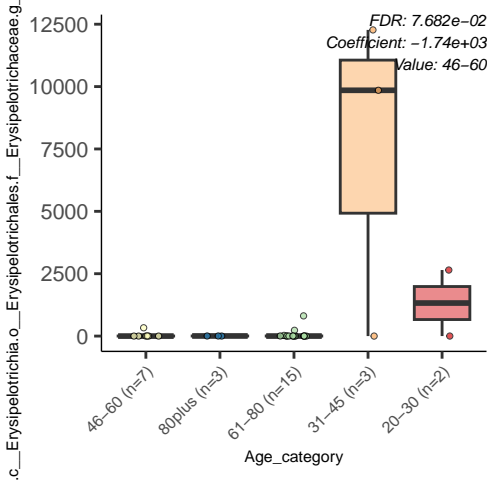



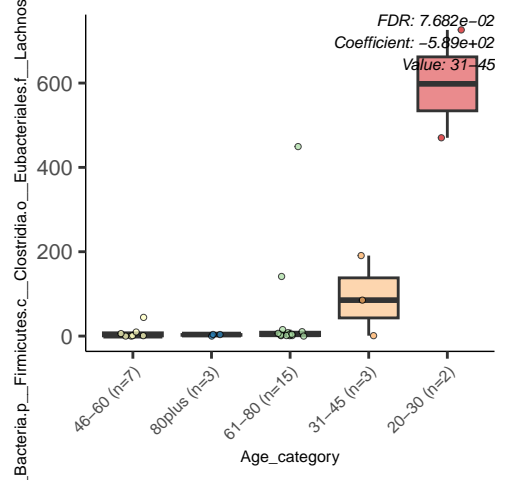

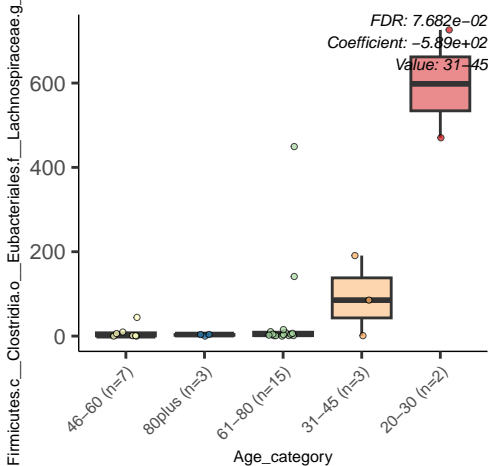

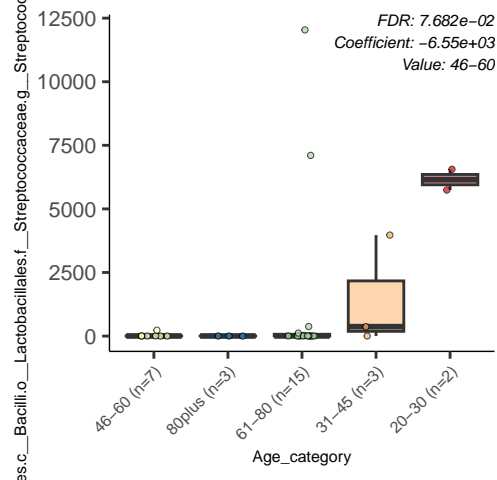

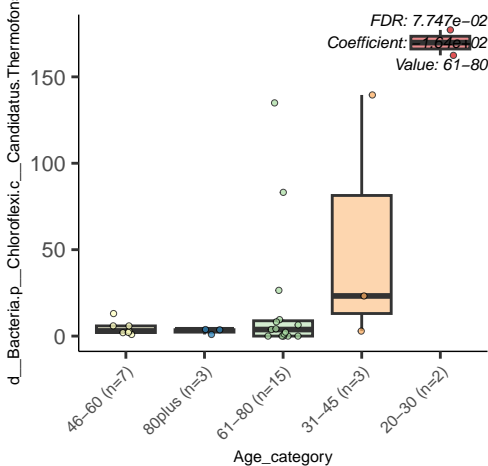

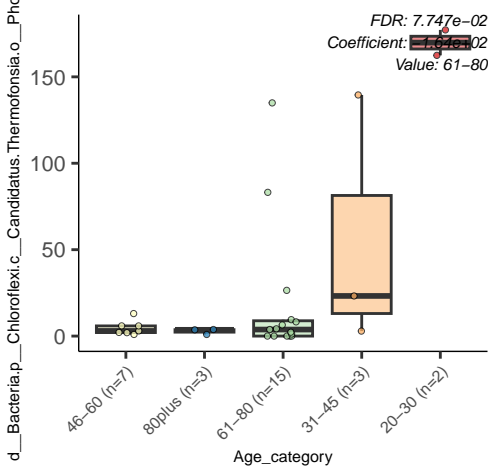

eria.p\_\_Chloroflexi.c\_\_Candidatus.Thermofonsia.o\_\_Phototrophical

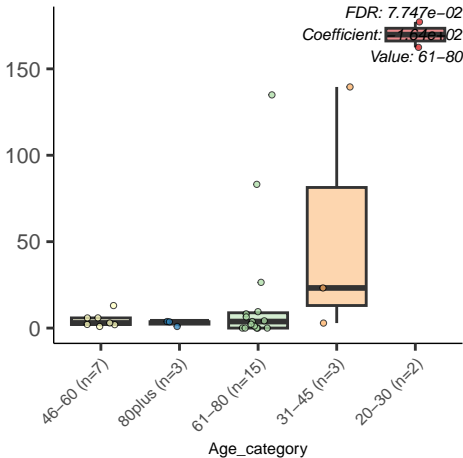

Chloroflexi.c\_\_Candidatus.Thermofonsia.o\_\_Phototrophicales.f\_\_Pho

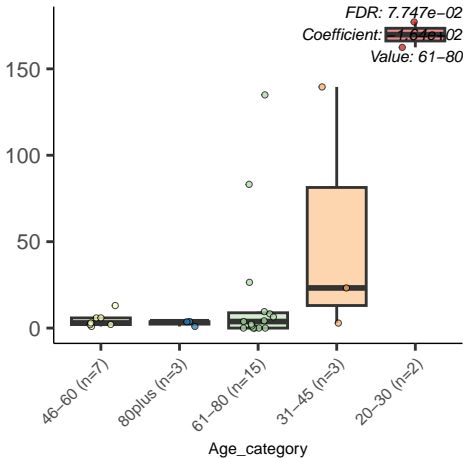

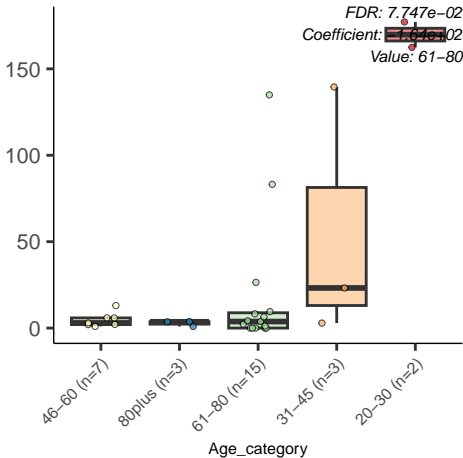



cutes.c\_\_Bacilli.o\_\_Lactobacillales.f\_\_Streptococcaceae.g\_\_Strepto

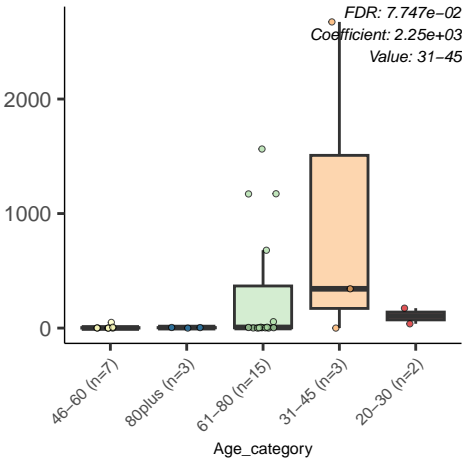

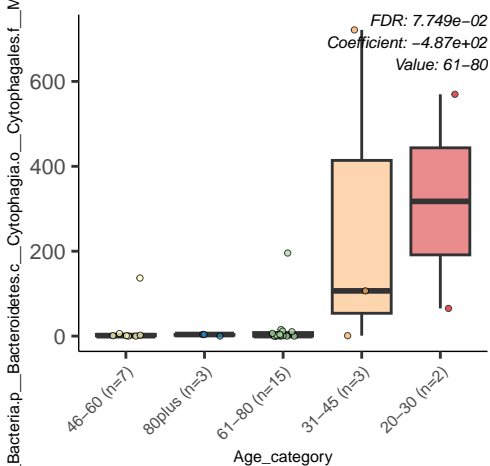

a.p\_\_Bacteroidetes.c\_\_Cytophagia.o\_\_Cytophagales.f\_\_Mangroviv

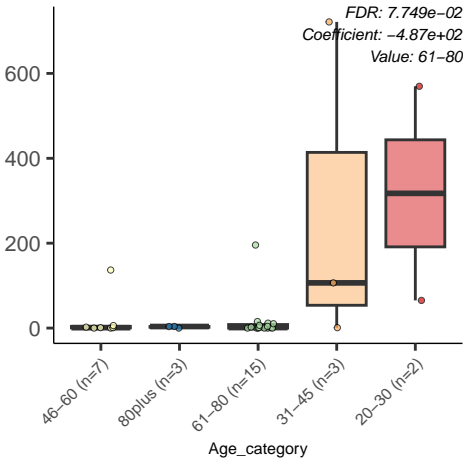

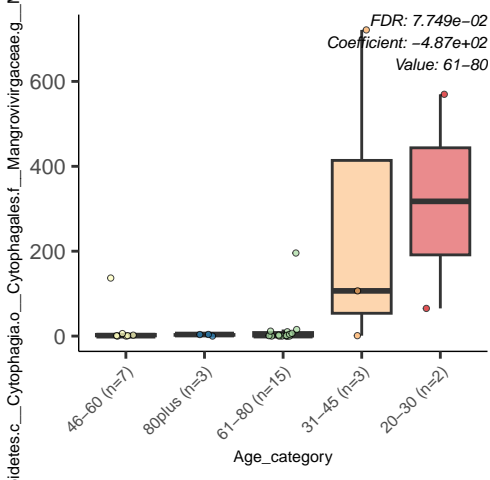

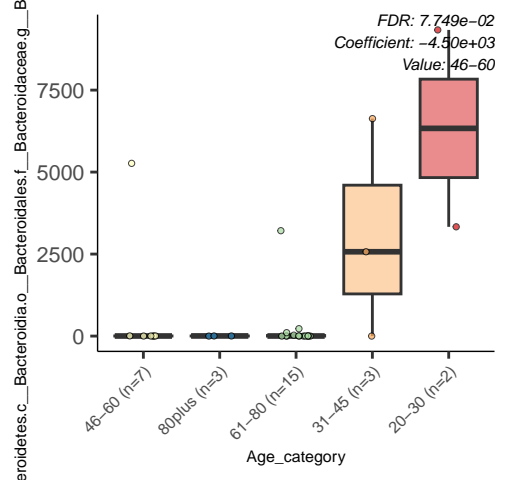

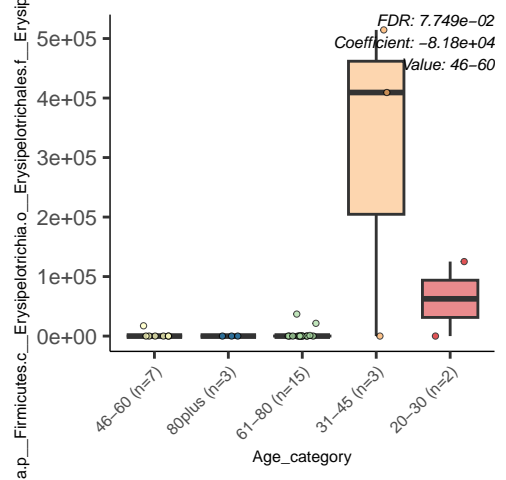

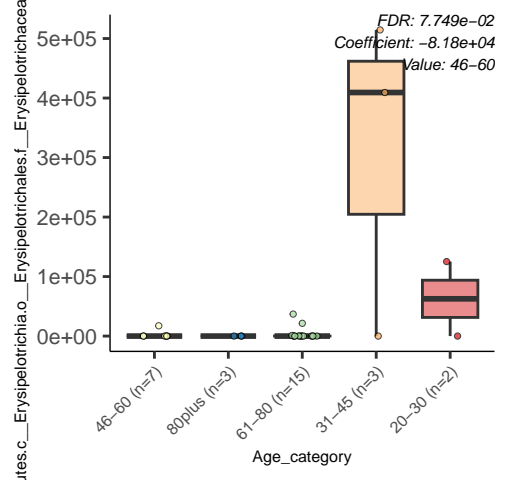

a.p.\_Firmicutes.c.\_Clostridia.o.\_Eubacteriales.f.\_Lachnospiraceae

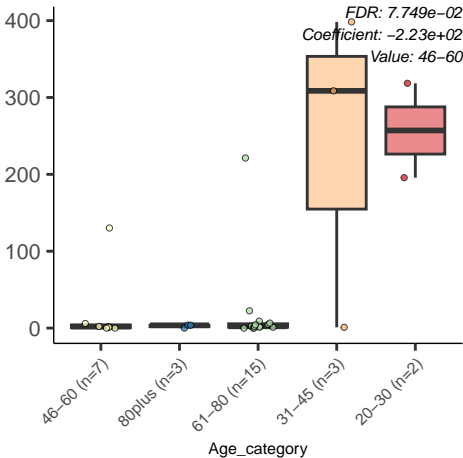



\_\_Bacteroidetes.c\_\_Flavobacteriia.o\_\_Flavobacteriales.f\_\_Flavoba

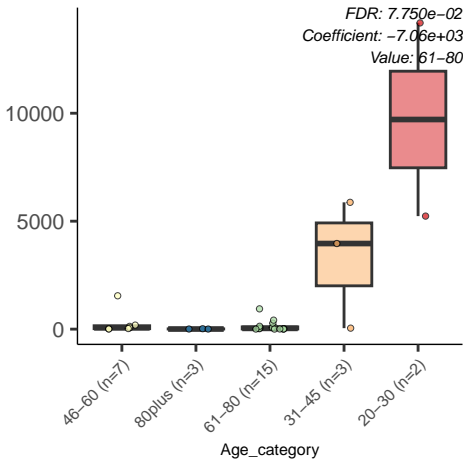

d\_Bacteria.p\_\_Spirochaetes

1e+05

5e+04

0e+00

FDR: 7.763e-02  
Coefficient: -2.93e+04  
Value: 80plus

46-60 (n=7)

80plus (n=3)

61-80 (n=15)

31-45 (n=3)

20-30 (n=2)

Age\_category

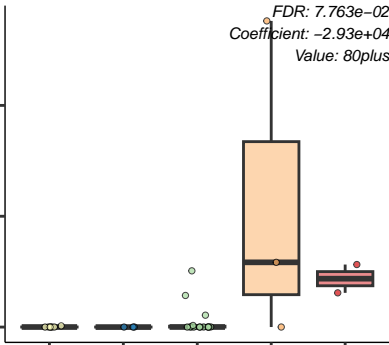

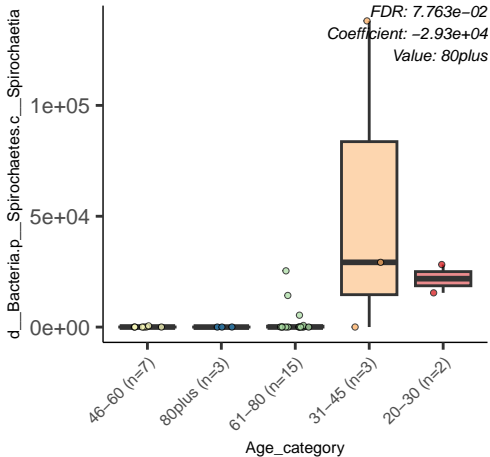

d\_\_Bacteria.p\_Actinobacteria.c\_Actinomycetia.o\_Coryneb

FDR: 7.767e-02  
Coefficient: 1.99e+05  
Value: 61-80

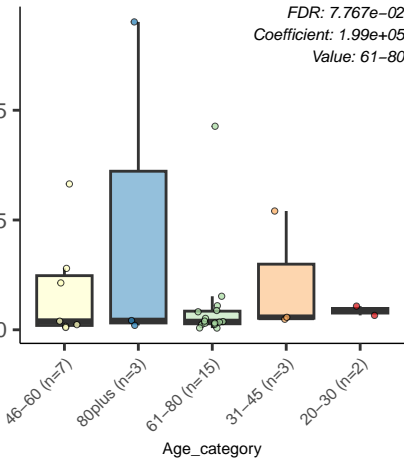

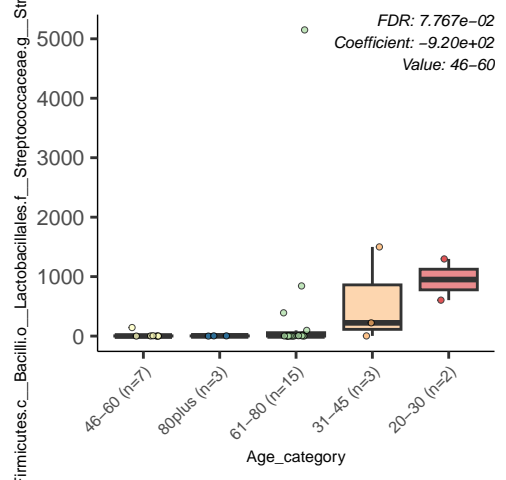

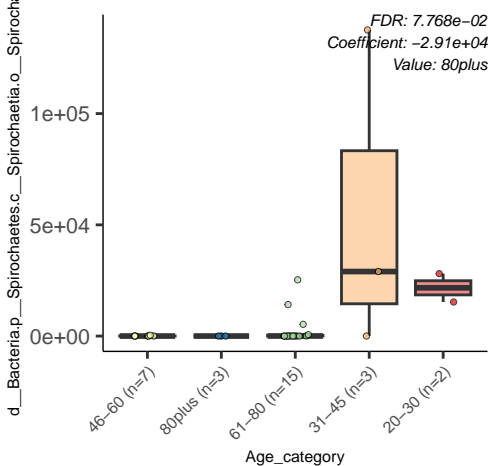

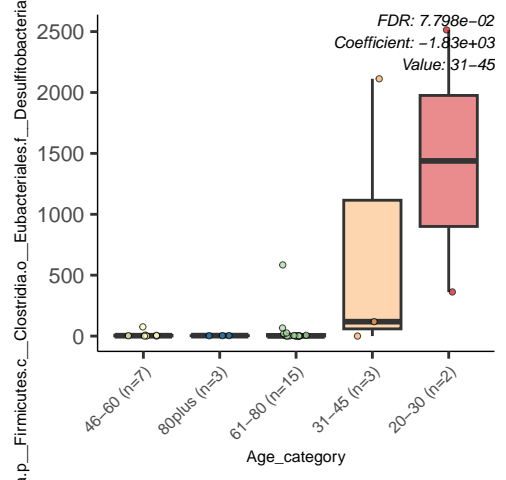

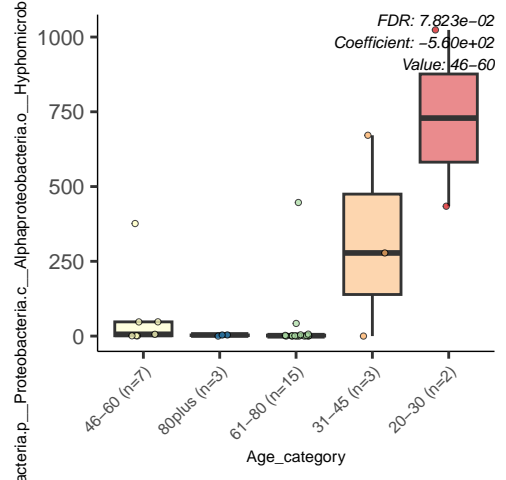



Proteobacteria.c\_\_Alphaproteobacteria.o\_\_Hyphomicrobiales.g\_\_Tetrasphaera

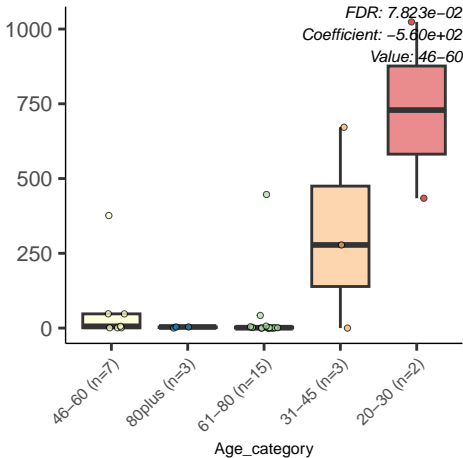

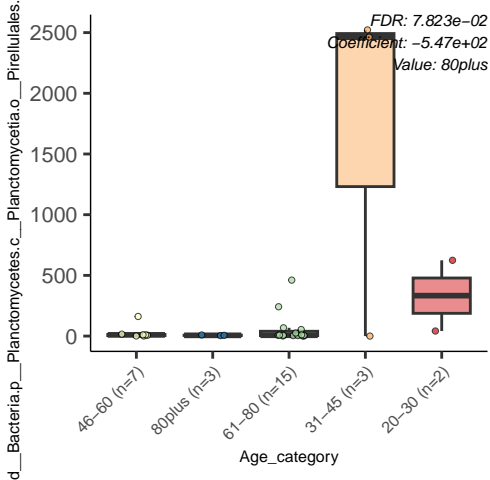

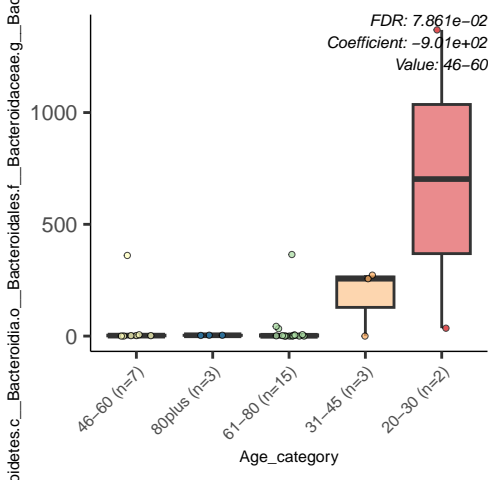

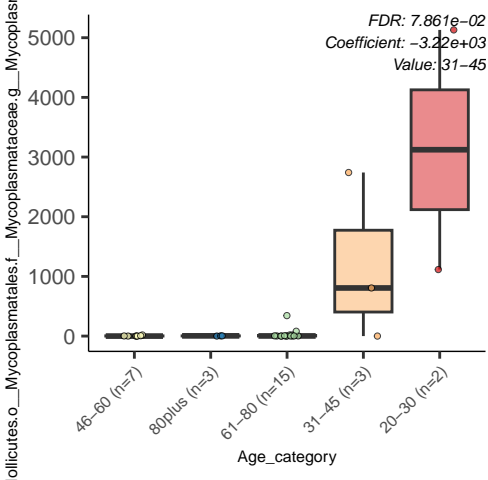

bacteria.p\_Actinobacteria.c\_Actinomycetia.o\_Corynebacteriales.f\_

FDR:  $7.861e-02$   
Coefficient:  $2.02e+05$   
Value: 61-80

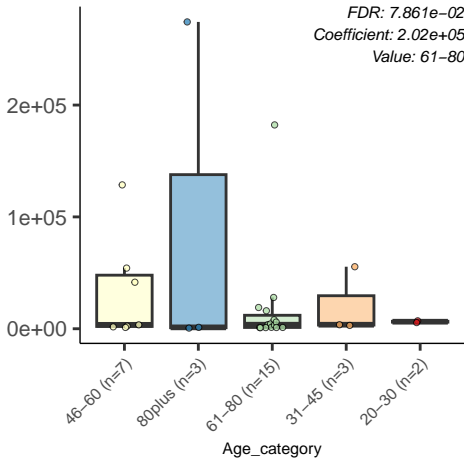

Actinobacteria.c\_\_Actinomycetia.o\_\_Corynebacteriales.f\_\_Coryneb

FDR: 7.861e-02  
Coefficient: 2.02e+05  
Value: 61-80

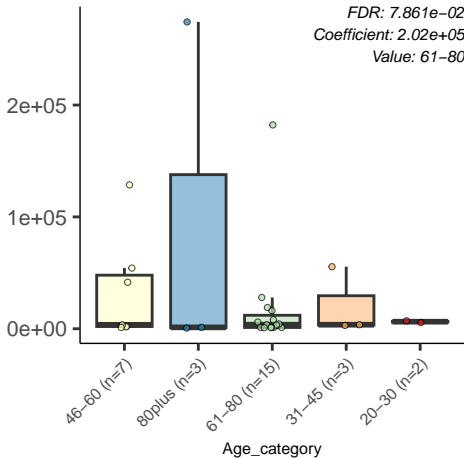

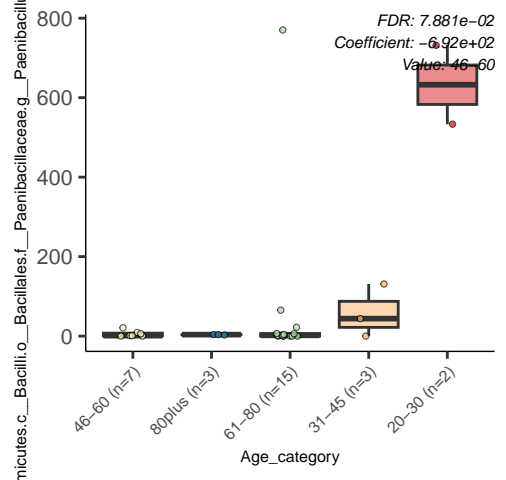

Actinomycetia.o\_\_Corynebacteriales.f\_\_Corynebacteriaceae.g

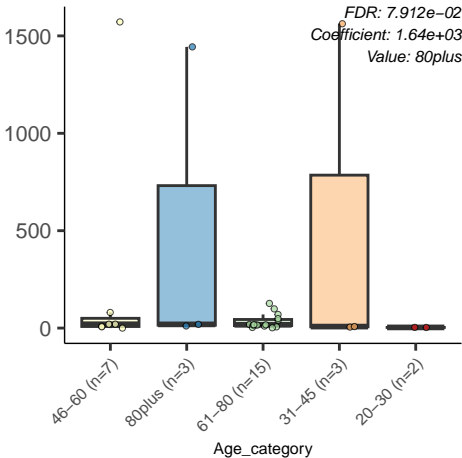



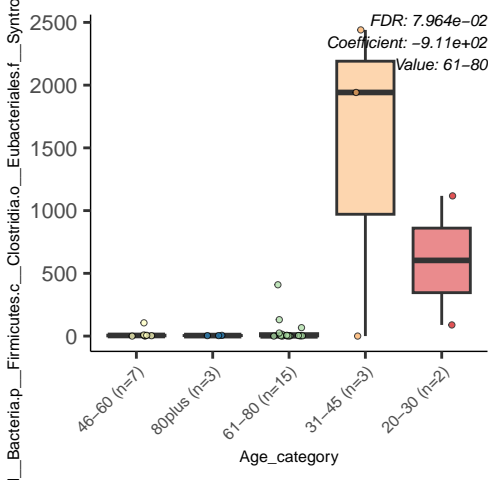

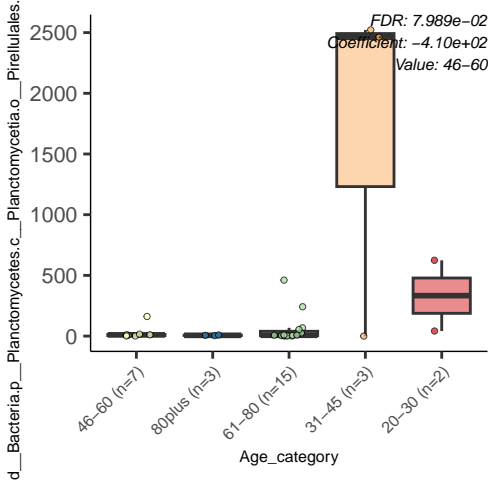

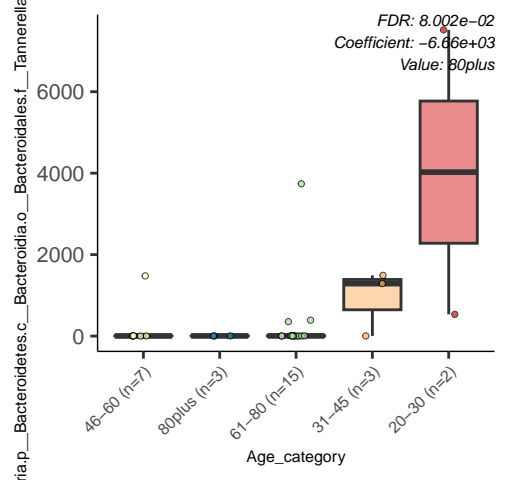

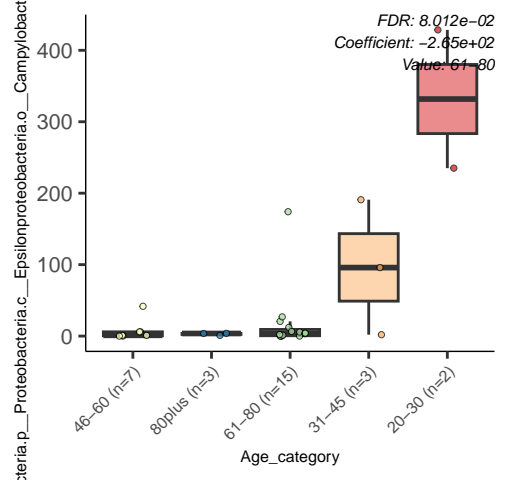

Cyanobacteria.c\_\_Gloeobacteria.o\_\_Gloeobacterales.f\_\_Gloeobac

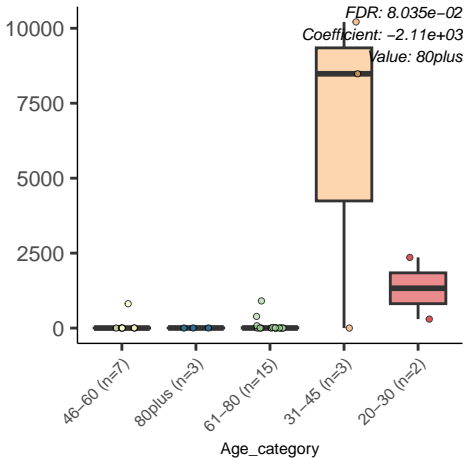

\_\_Gloeobacteria.o\_\_Gloeobacterales.f\_\_Gloeobacteraceae.g\_\_Ant

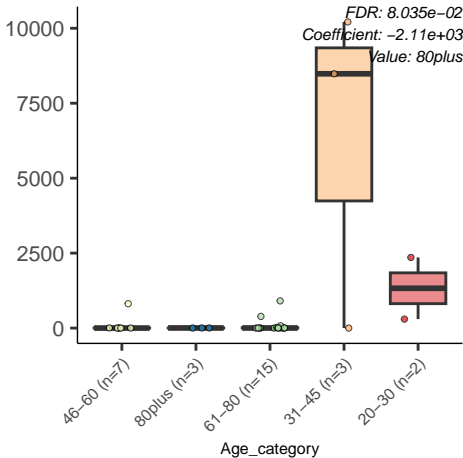

acteria.p\_\_Firmicutes.c\_\_Clostridia.o\_\_Eubacteriales.f\_\_Oscillospirac

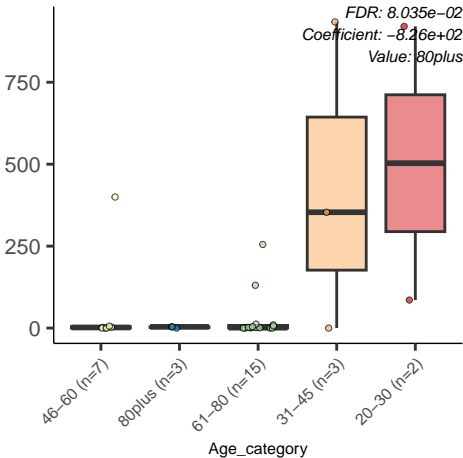

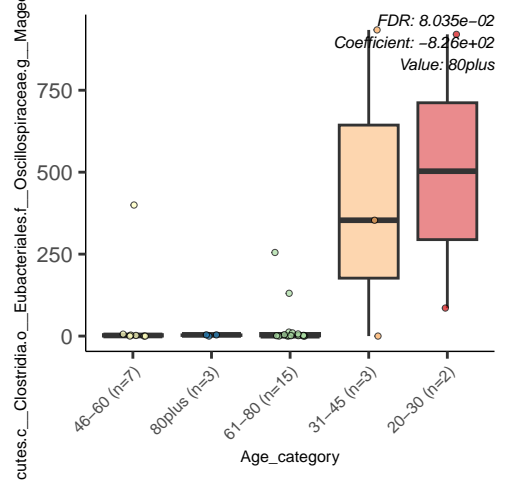



acteria.p\_\_Firmicutes.c\_\_Clostridia.o\_\_Eubacteriales.f\_\_Lachnospira

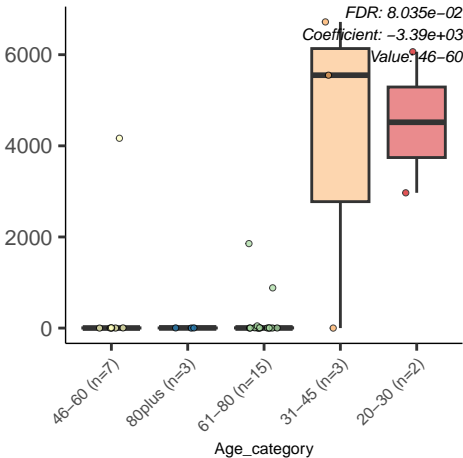

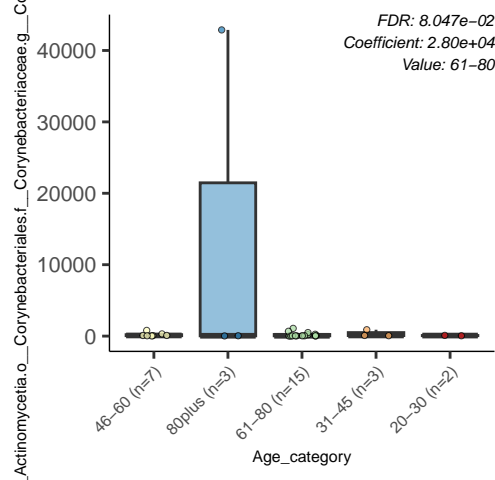

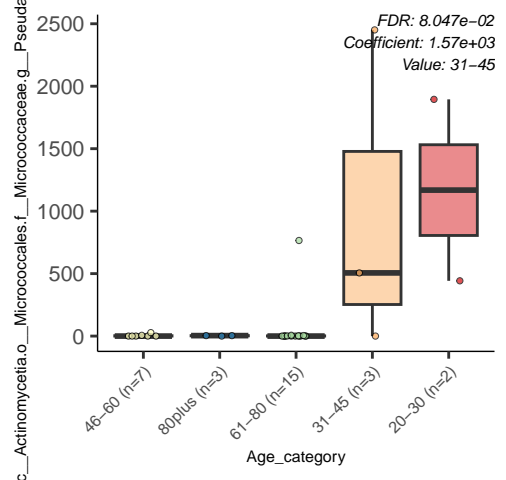

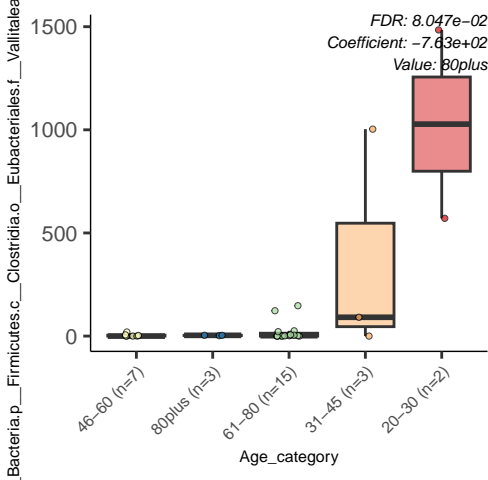

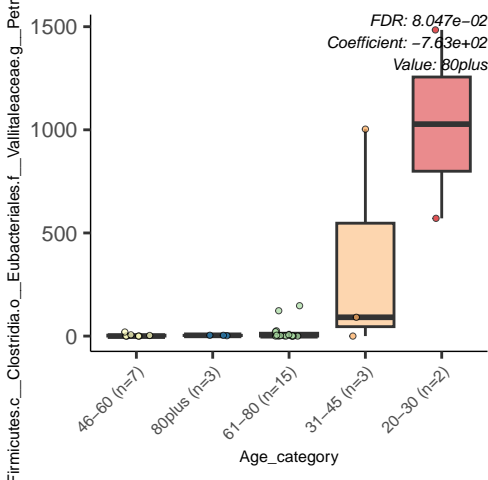

acteria.p\_Firmicutes.c\_Clostridia.o\_Eubacteriales.f\_Lachnospira

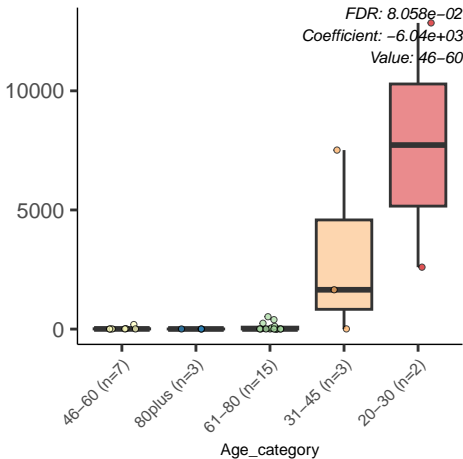

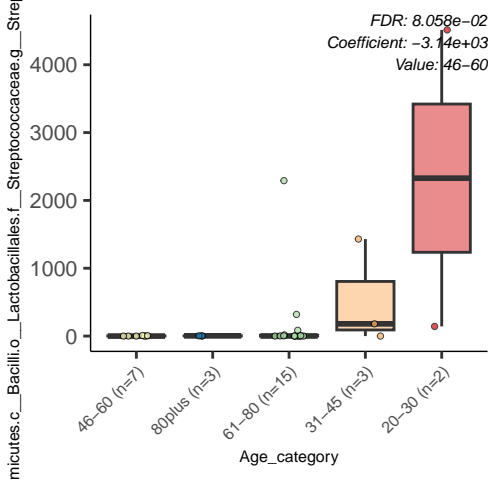

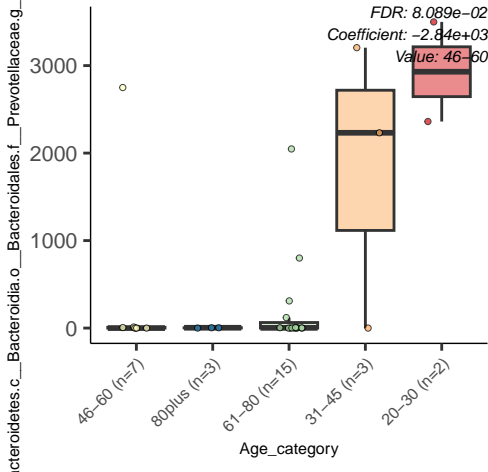



p\_\_Firmicutes.c\_\_Erysipelotrichia.o\_\_Erysipelotrichales.f\_\_Erysipe

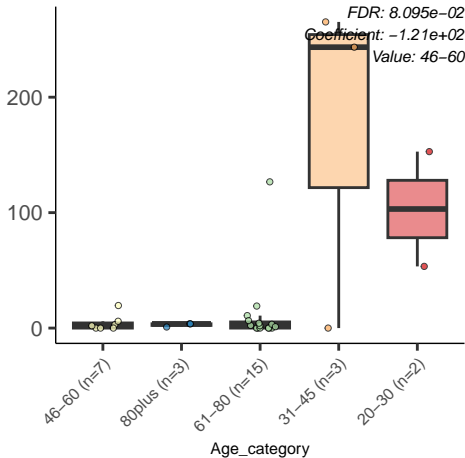

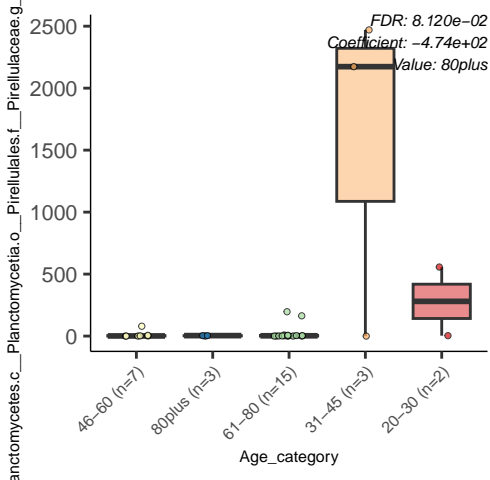

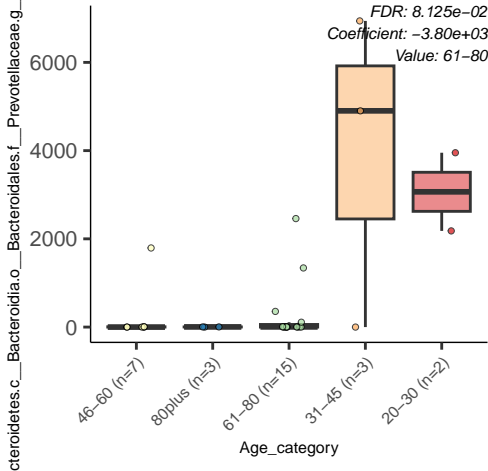

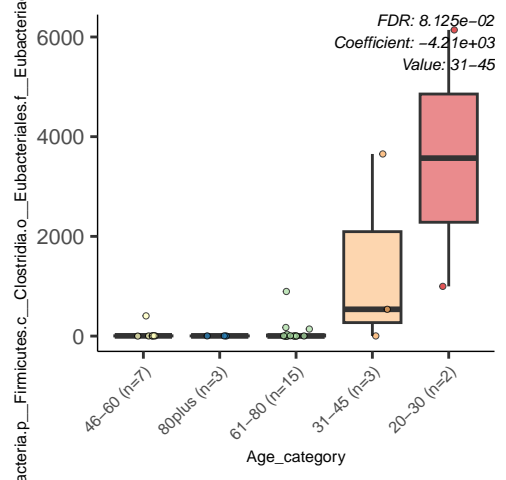

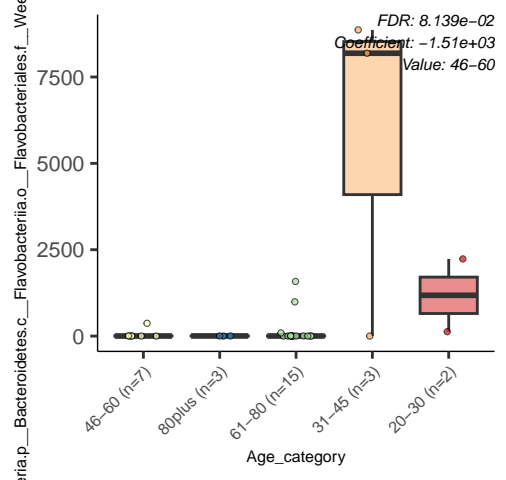

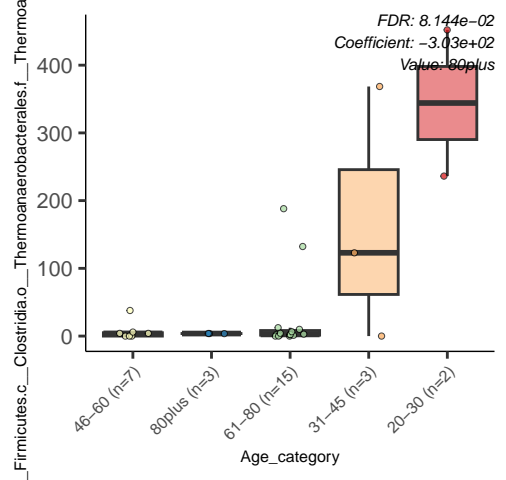

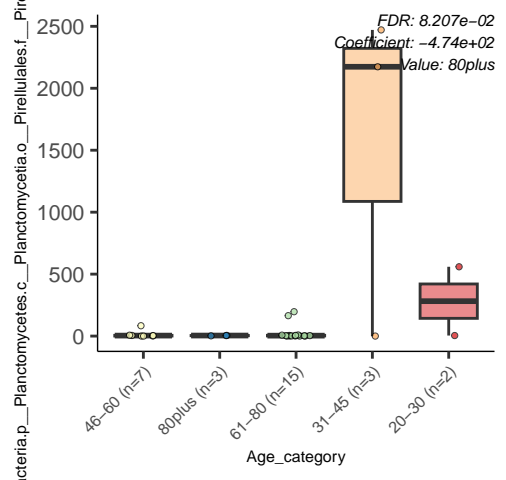

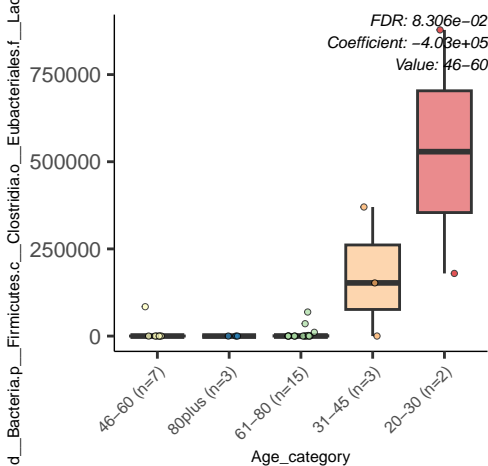



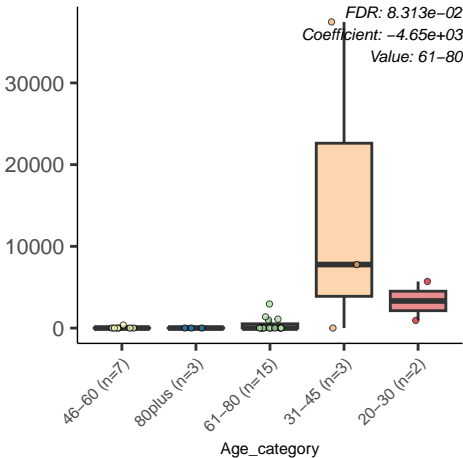

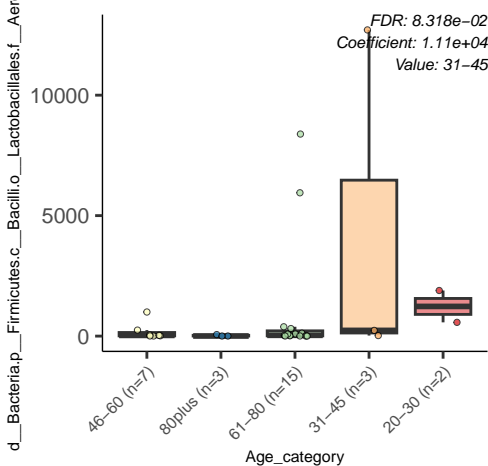

Cyanobacteria.c\_\_Gloeobacteria.o\_\_Gloeobacterales.f\_\_Gloeobac

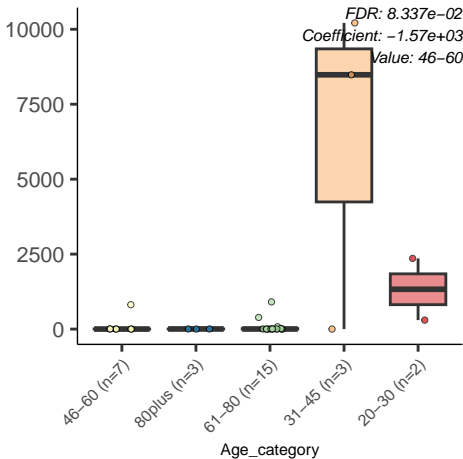

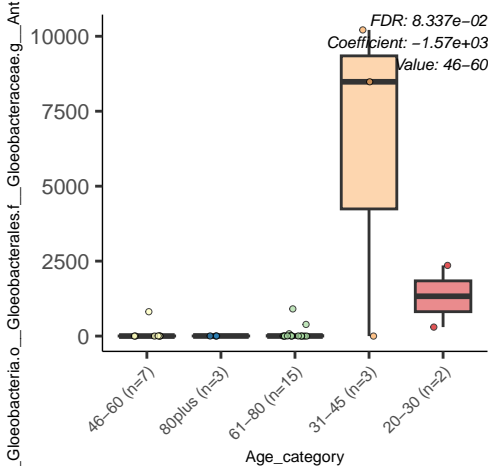

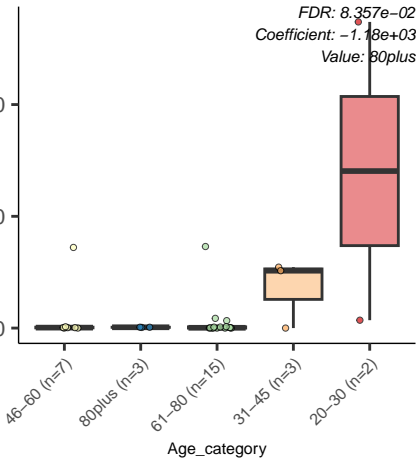

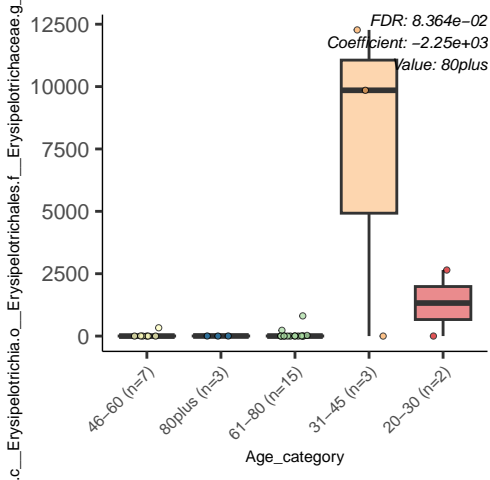

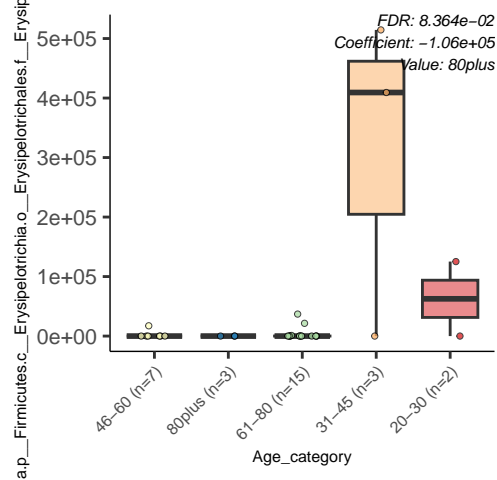

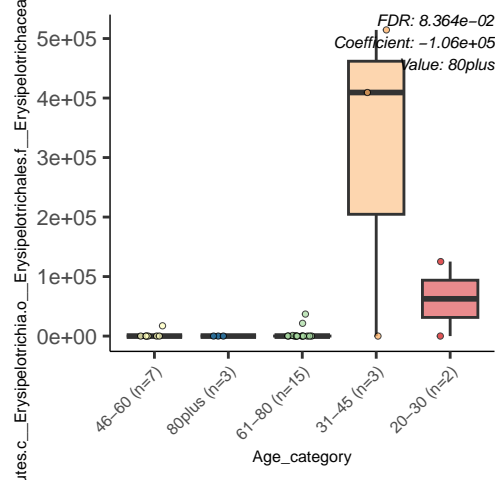



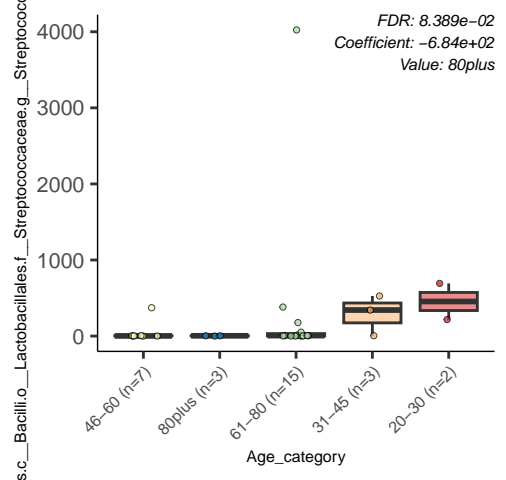

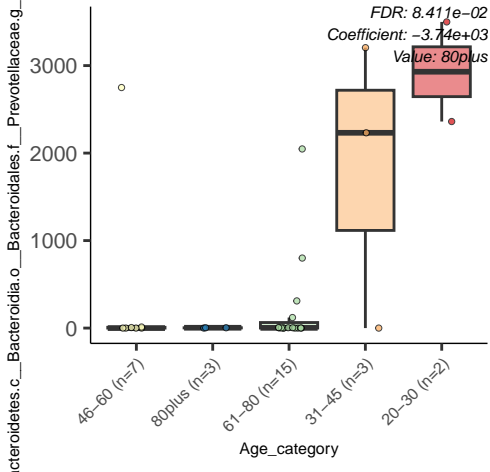

p\_\_Bacteroidetes.c\_\_Flavobacteriia.o\_\_Flavobacteriales.f\_\_Weeks

FDR:  $8.432e-02$   
Coefficient:  $-1.70e+02$   
Value: 61-80

1000

500

0

46-60 (n=7)

80plus (n=3)

61-80 (n=15)

31-45 (n=3)

20-30 (n=2)

Age\_category

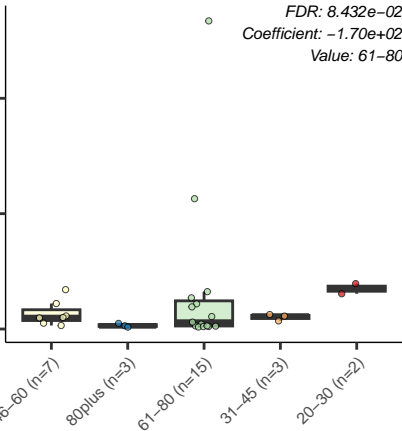

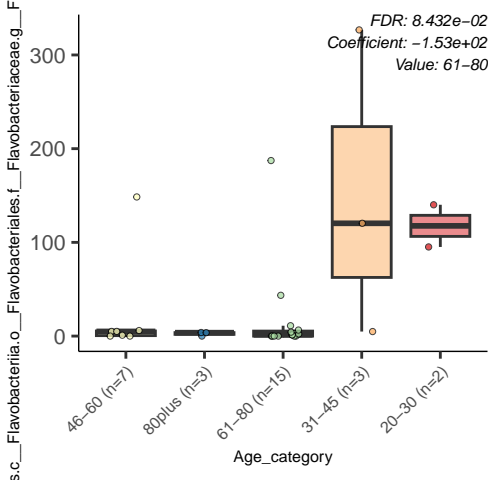

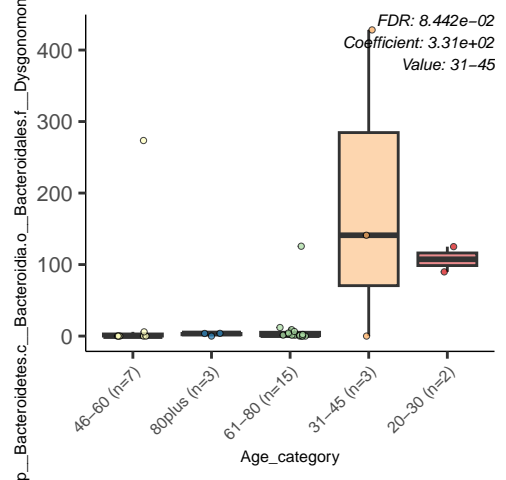

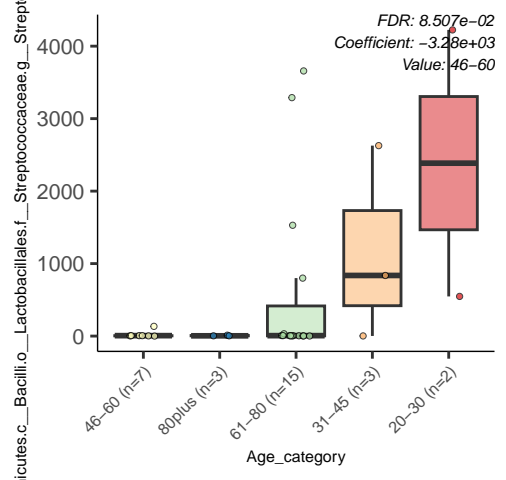

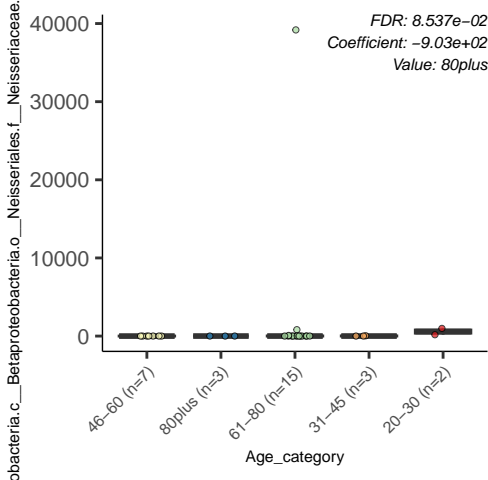

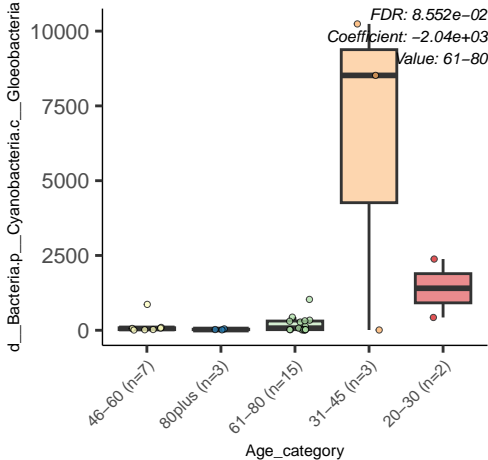



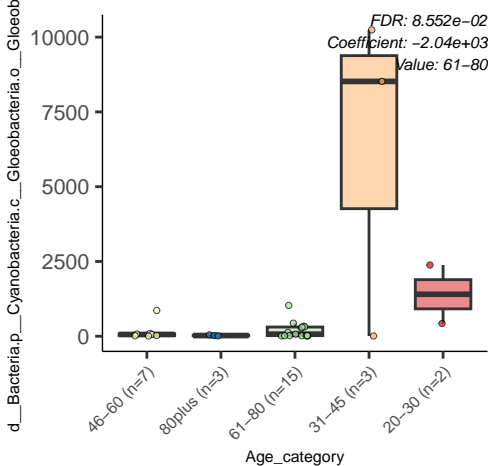

Bacteria.p\_\_Cyanobacteria.c\_\_Gloeobacteria.o\_\_Gloeobacterales.f\_\_

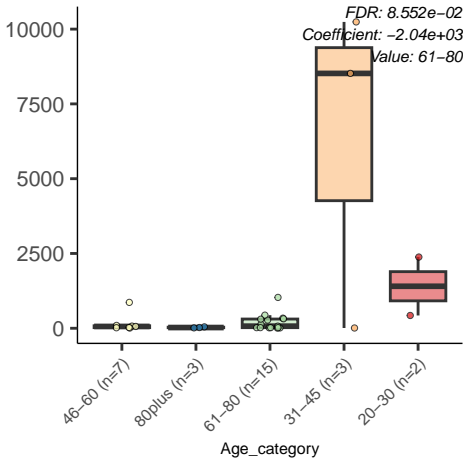

bacteria.c\_\_Fusobacteriia.o\_\_Fusobacteriales.f\_\_Leptotrichiaceae.g

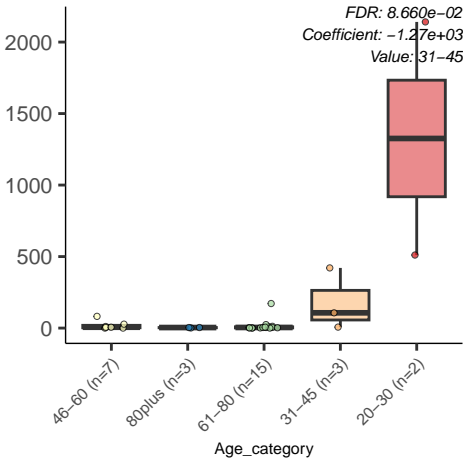

d\_\_Bacteria.p\_\_Chlorobi

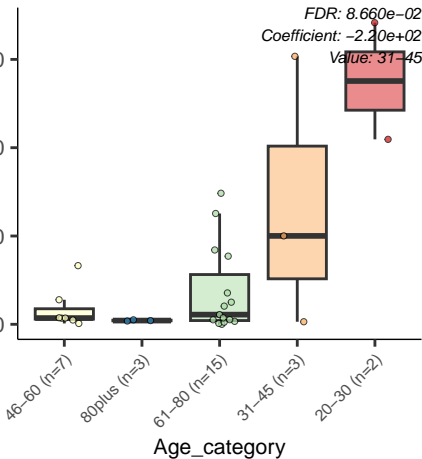

d\_Bacteria.p\_\_Chlorobi.c\_\_Chlorobia

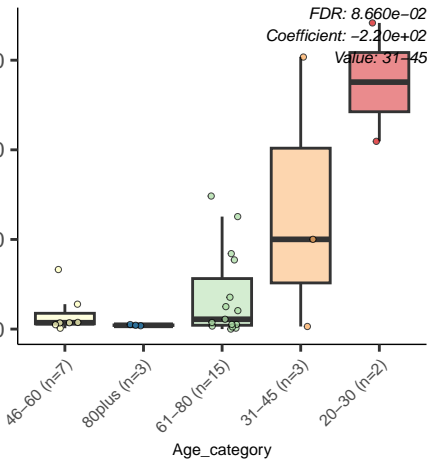

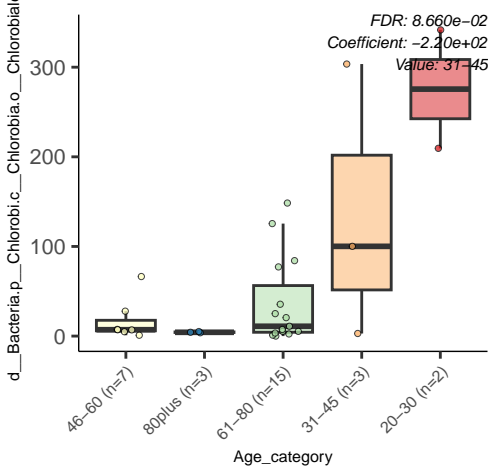

d\_\_Bacteria.p\_\_Chlorobi.c\_\_Chlorobia.o\_\_Chlorobiales.f\_\_Ch

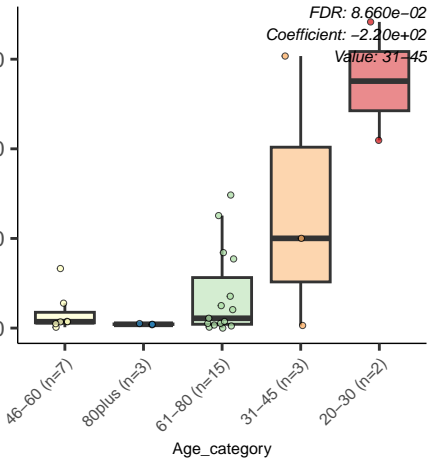

u.p\_\_Actinobacteria.c\_\_Actinomycetia.o\_\_Micrococcales.f\_\_Derma

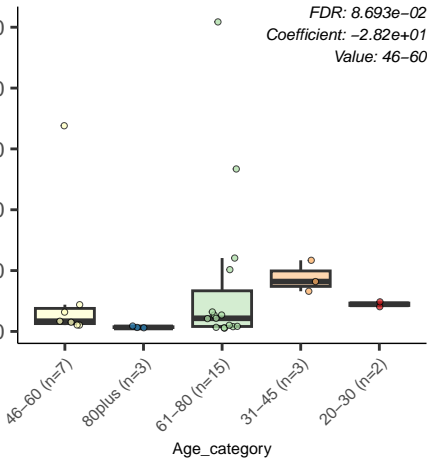



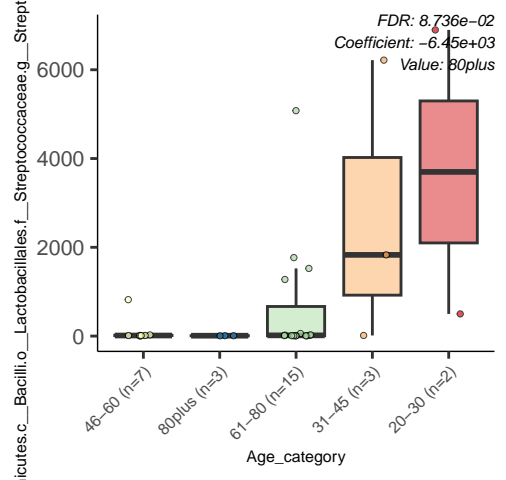

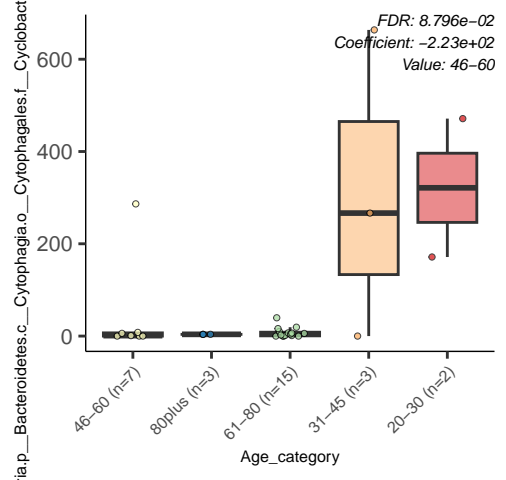

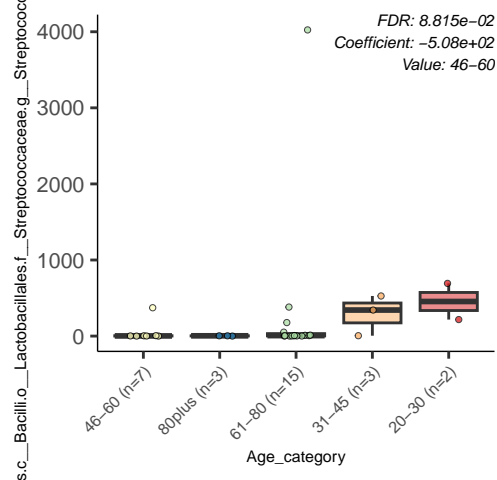

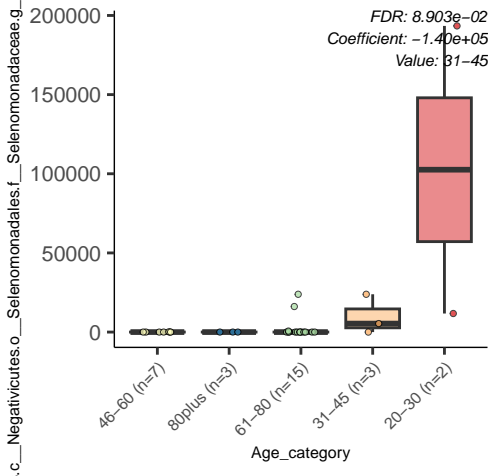

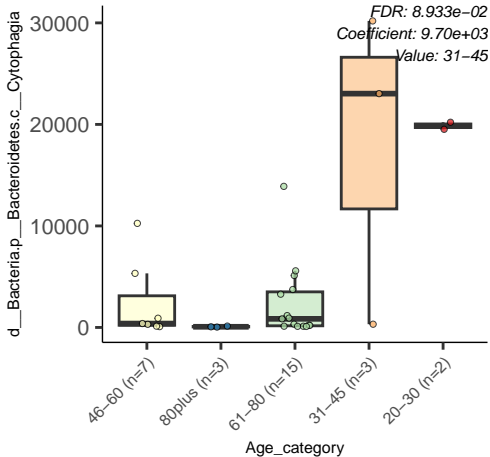

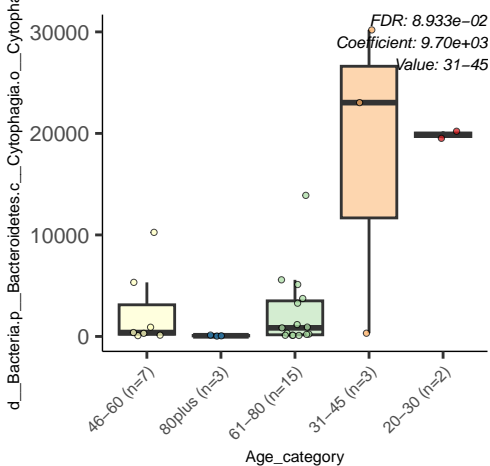

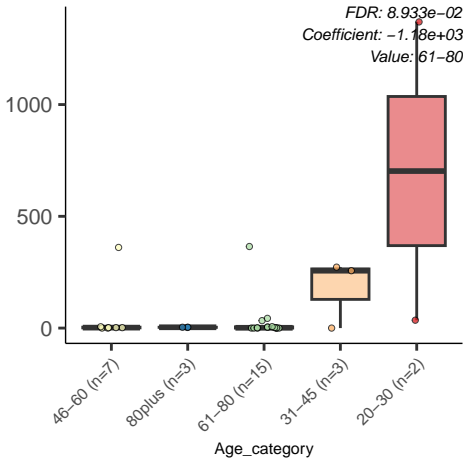

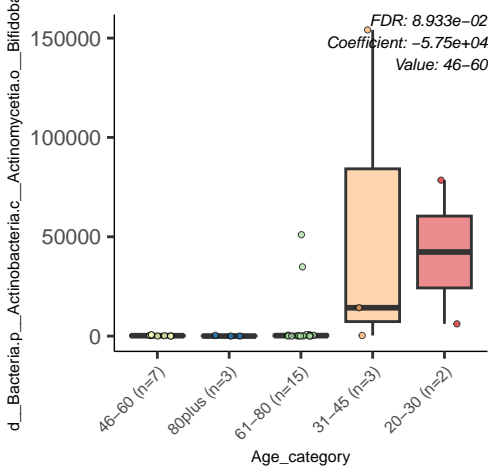



Bacteria.p\_Actinobacteria.c\_Actinomycetia.o\_Bifidobacteriales.f

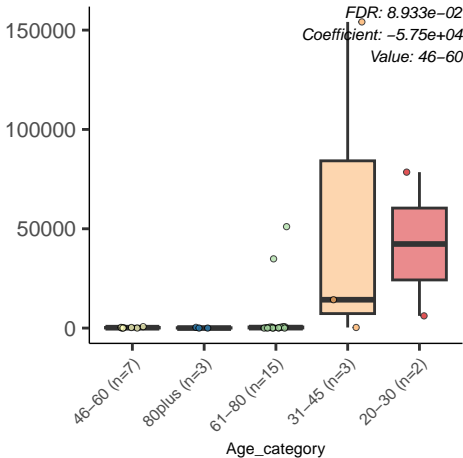

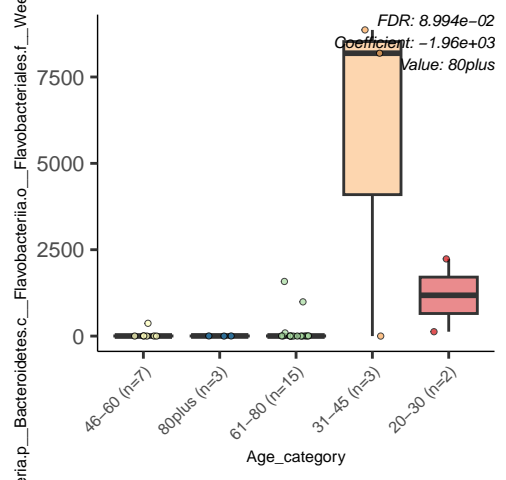

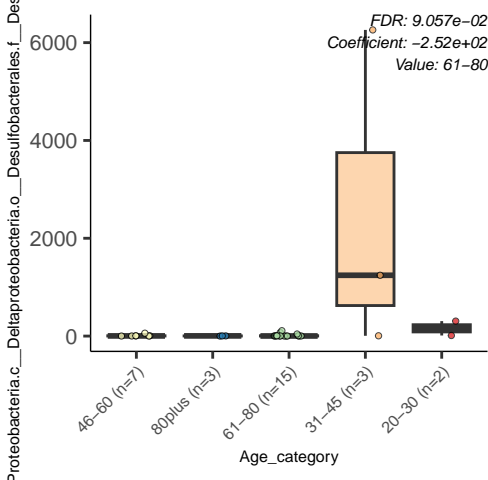

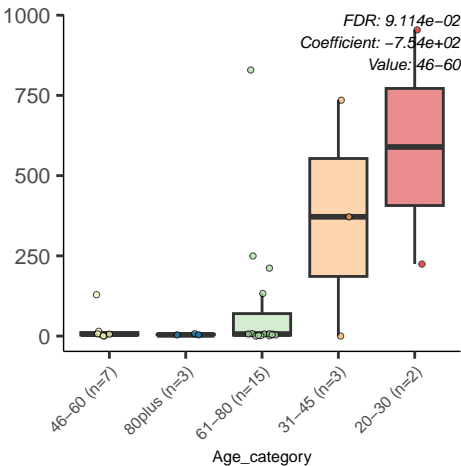

d\_Bacteria.p\_Thermotogae

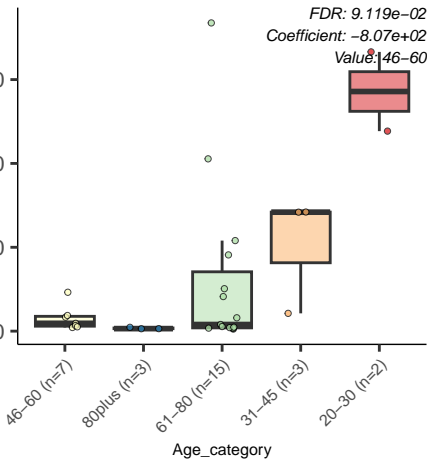

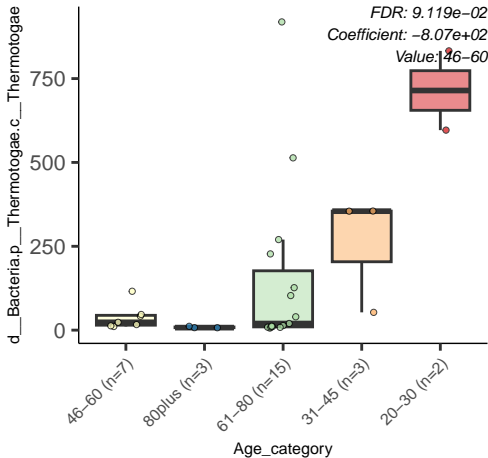

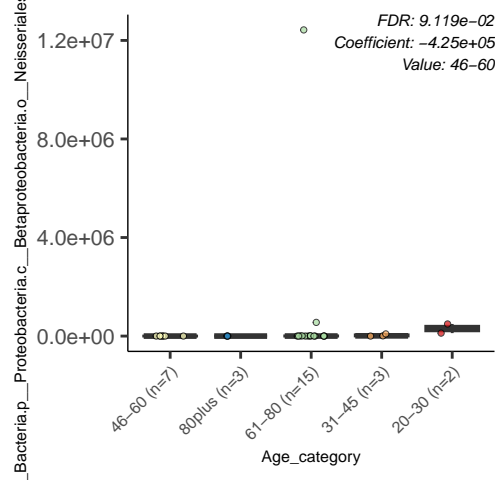

teria.p\_\_Proteobacteria.c\_\_Deltaproteobacteria.o\_\_Desulfobactera

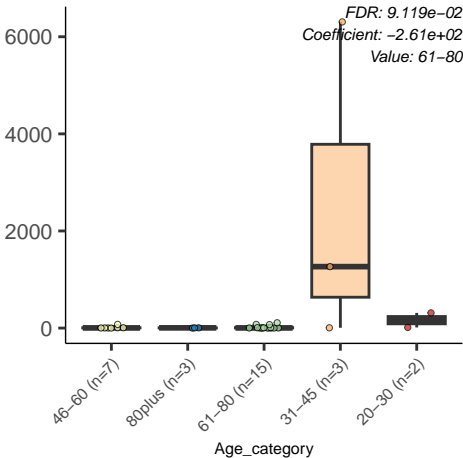



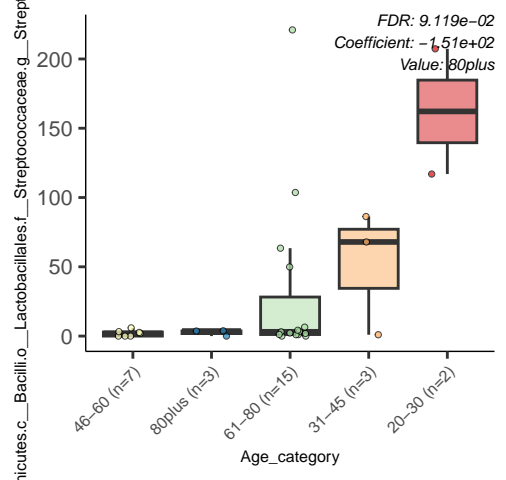

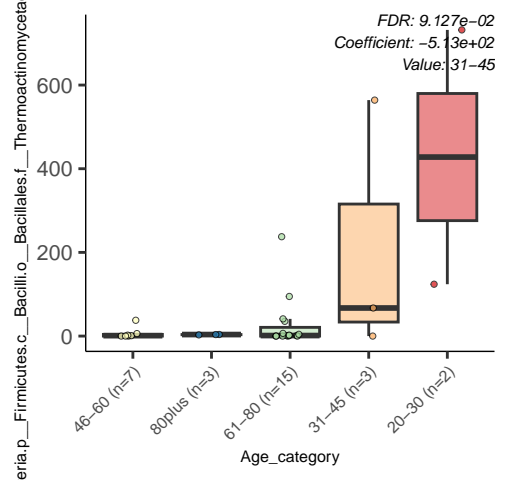

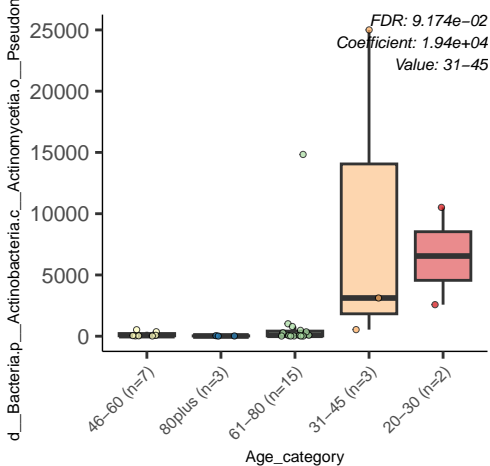

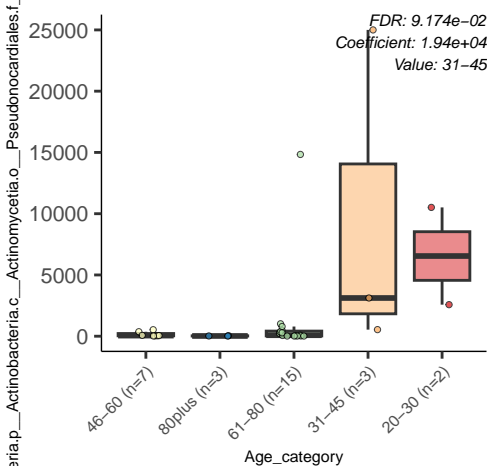

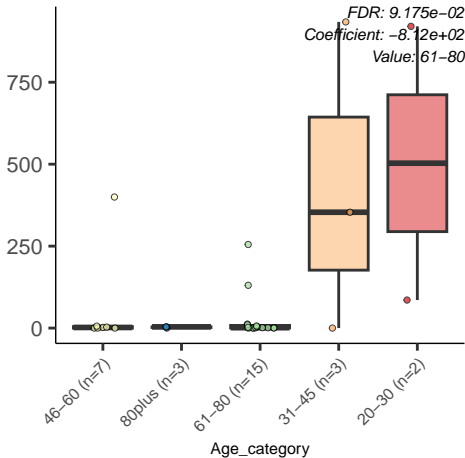

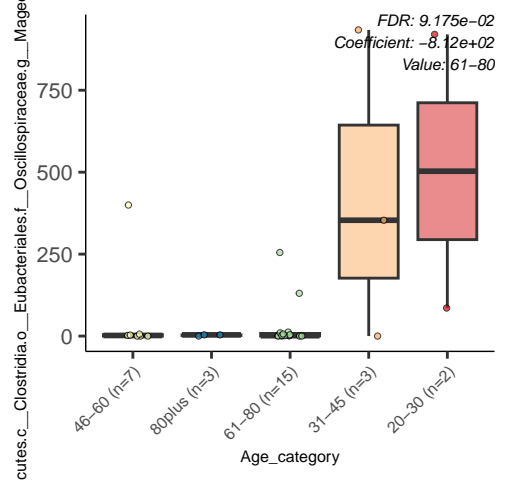

d\_\_Bacteria.p\_\_Nitrospirae

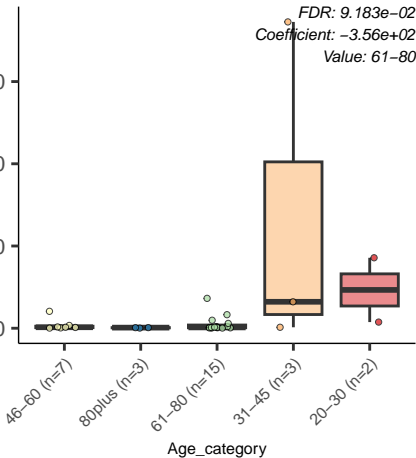

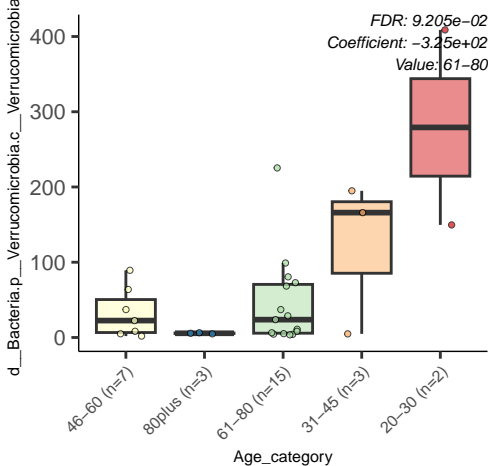



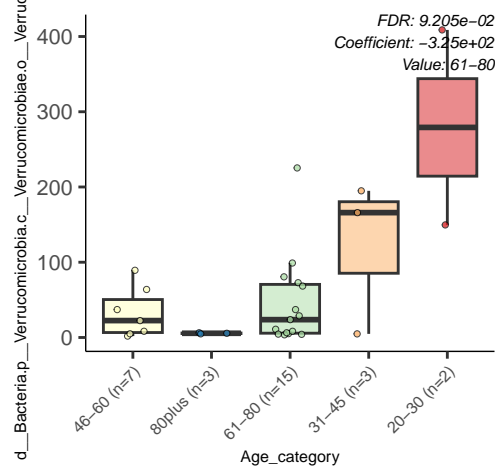

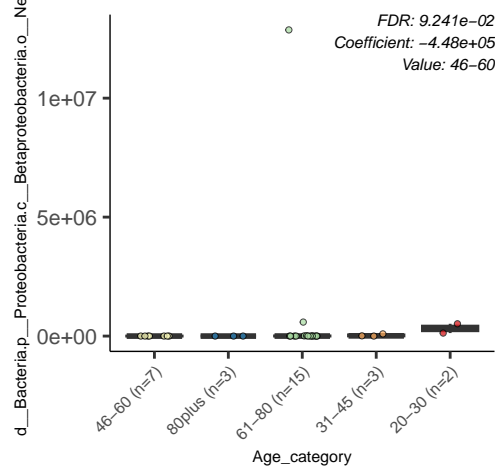

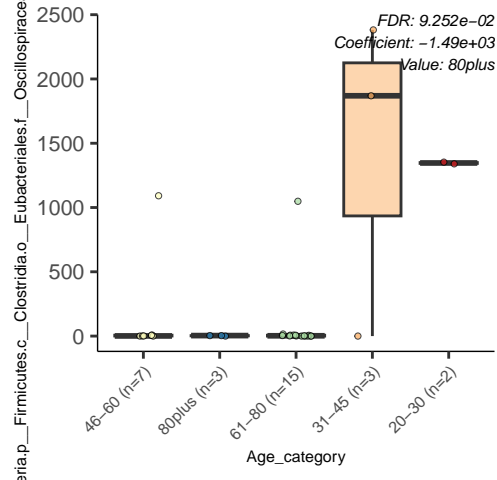

o\_\_Firmicutes.c\_\_Erysipelotrichia.o\_\_Erysipelotrichales.f\_\_Erysipel

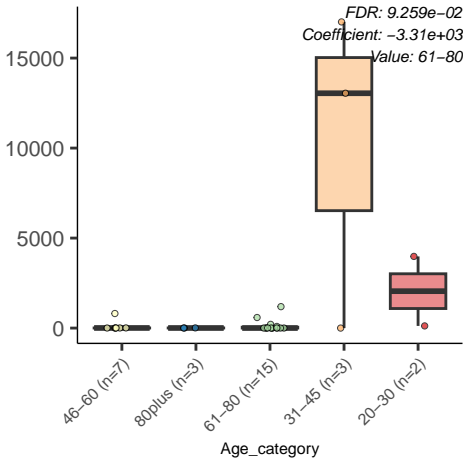

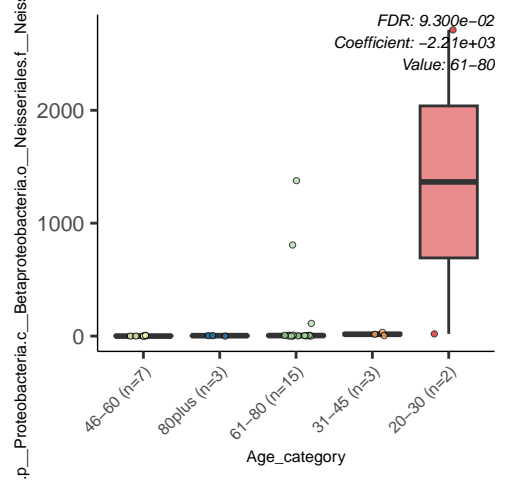

bacteria.c\_\_Betaproteobacteria.o\_\_Neisseriales.f\_\_Neisseriaceae.g

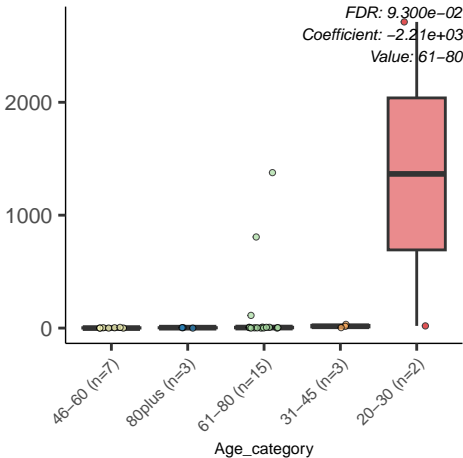

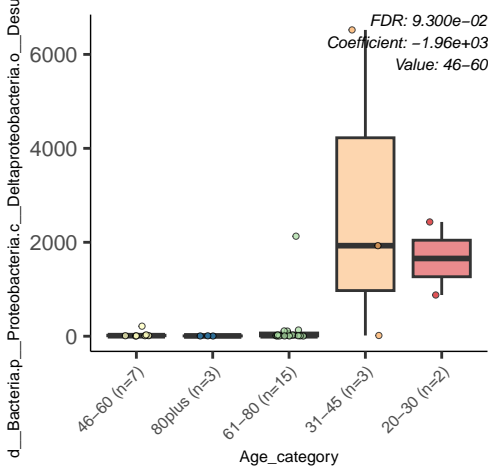

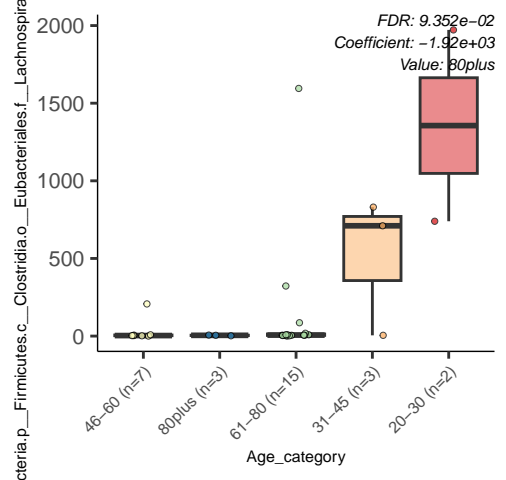



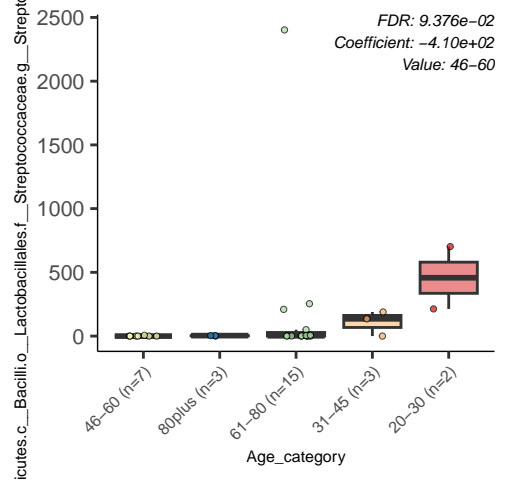

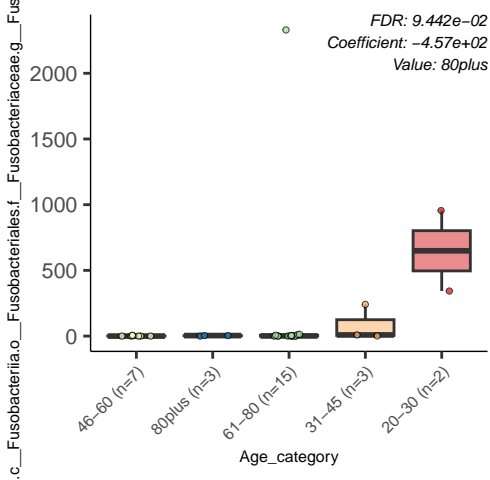

Firmicutes.c\_\_Clostridia.o\_\_Eubacteriales.f\_\_Lachnospiraceae.g\_\_

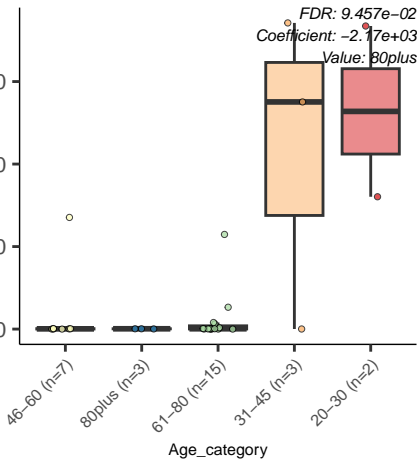

Cyanobacteria.c\_\_Gloeobacteria.o\_\_Gloeobacterales.f\_\_Gloeobac

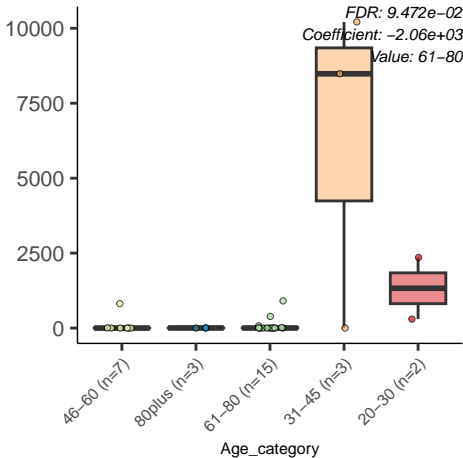

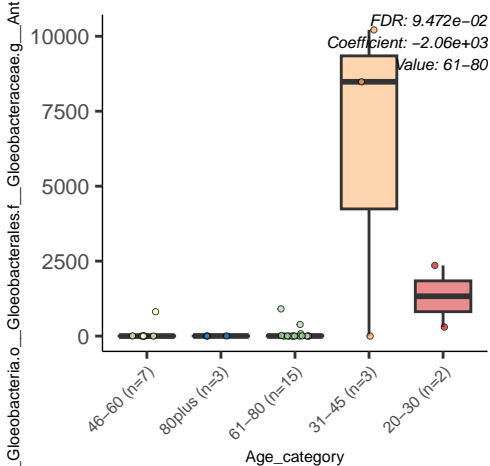

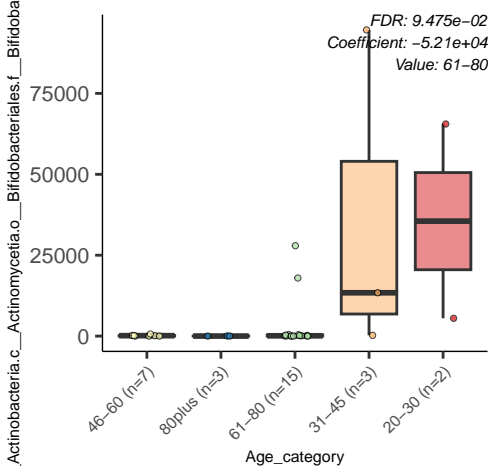

Firmicutes.c\_\_Clostridia.o\_\_Eubacteriales.f\_\_Lachnospiraceae.g

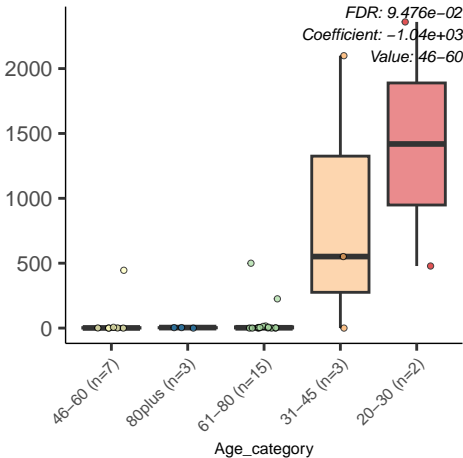

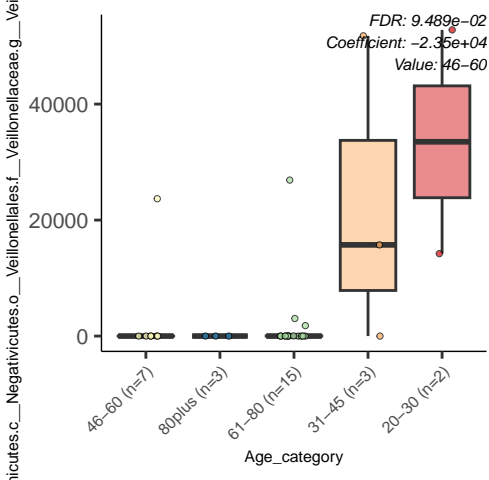



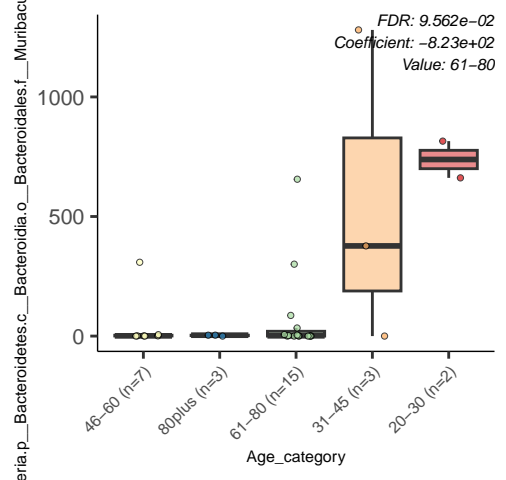

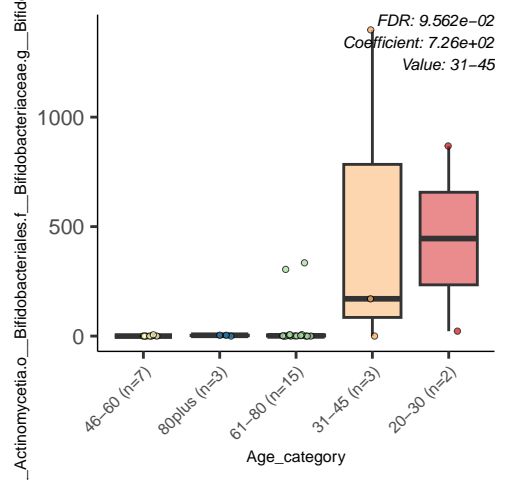

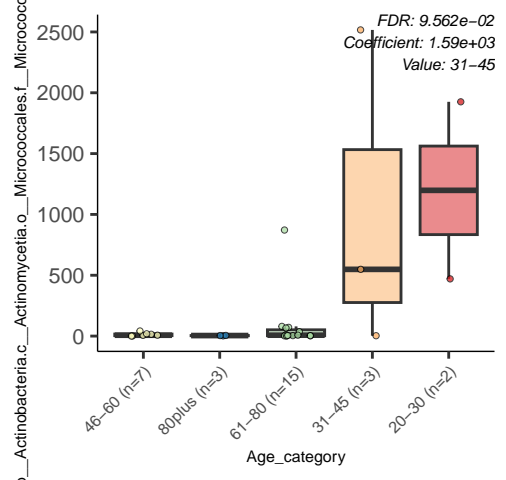

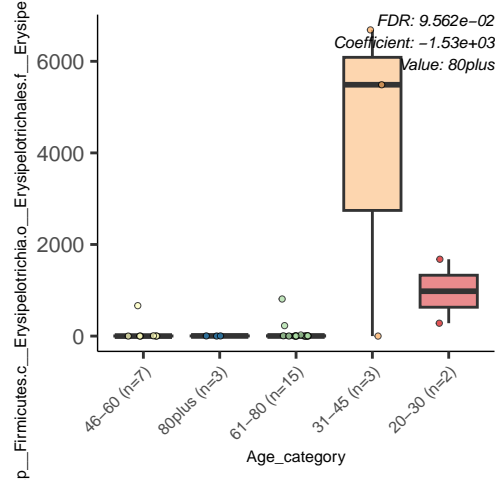

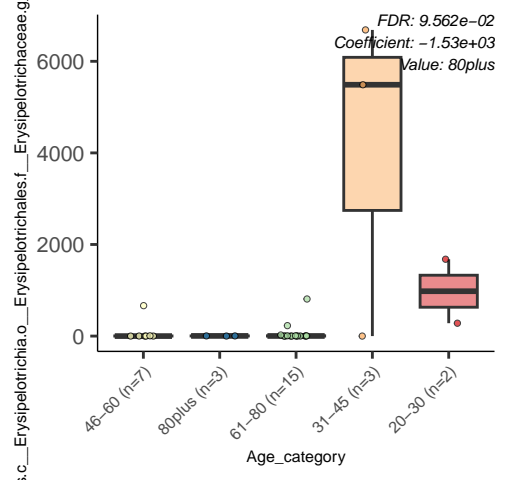

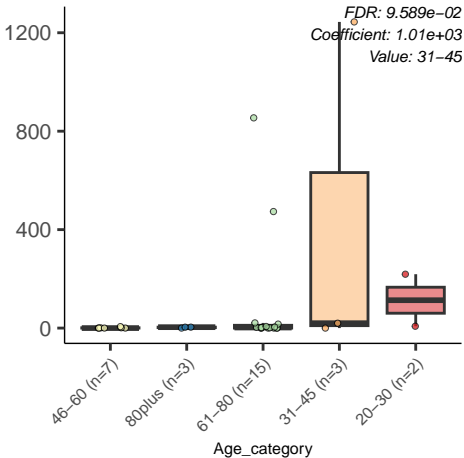

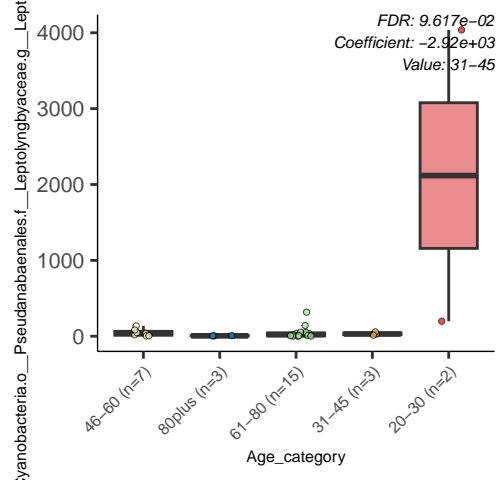

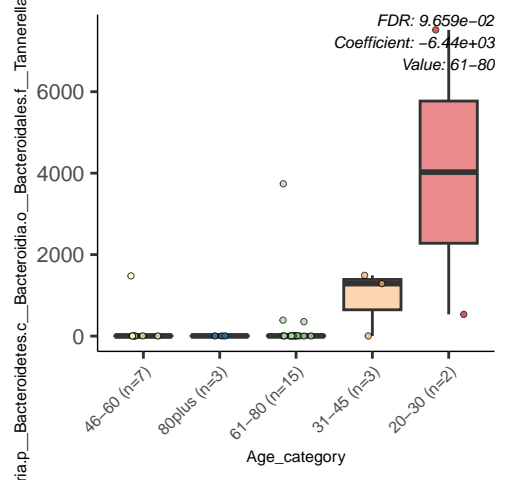



d\_\_Bacteria.p\_\_Chloroflexi

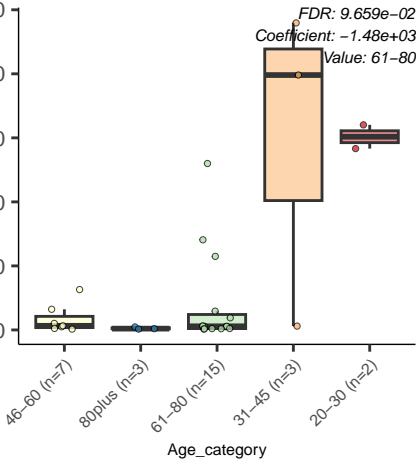

p\_Firmicutes.c\_\_Erysipelotrichia.o\_\_Erysipelotrichales.f\_\_Erysipe

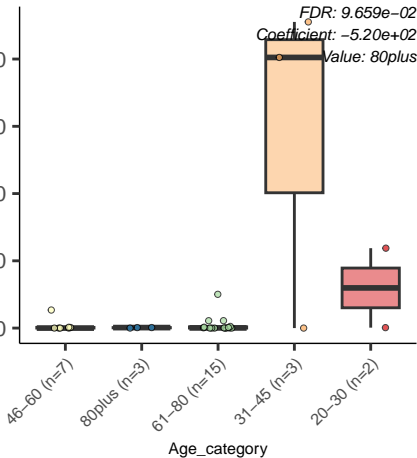

es.c\_\_Erysipelotrichia.o\_\_Erysipelotrichales.f\_\_Erysipelotrichaceae

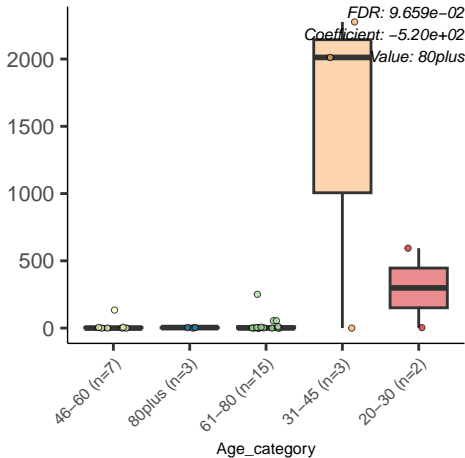

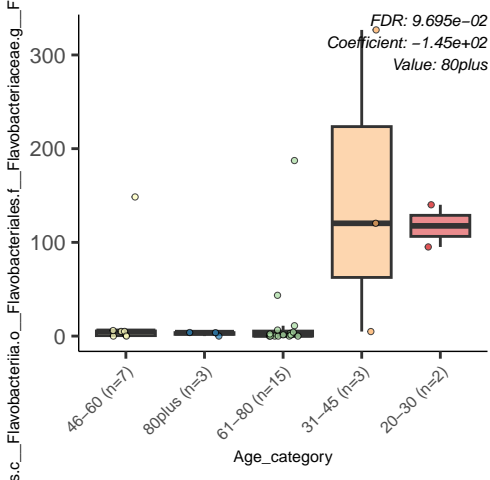

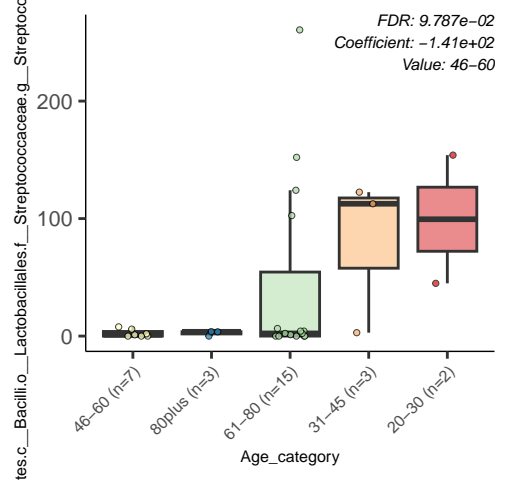

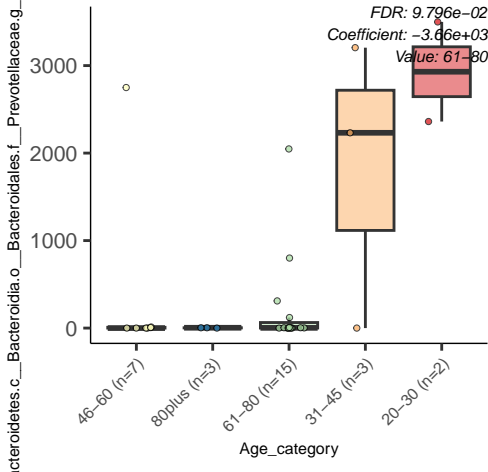

acteria.p\_\_Firmicutes.c\_\_Clostridia.o\_\_Eubacteriales.f\_\_Oscillospiraceae

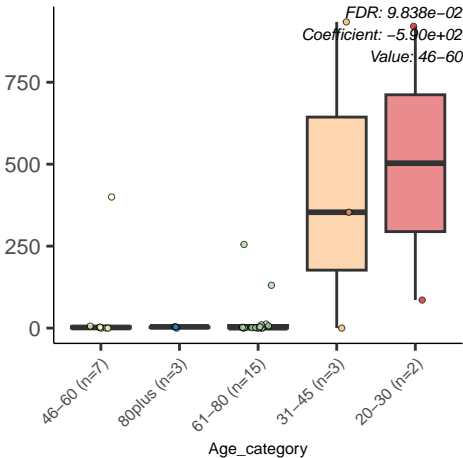

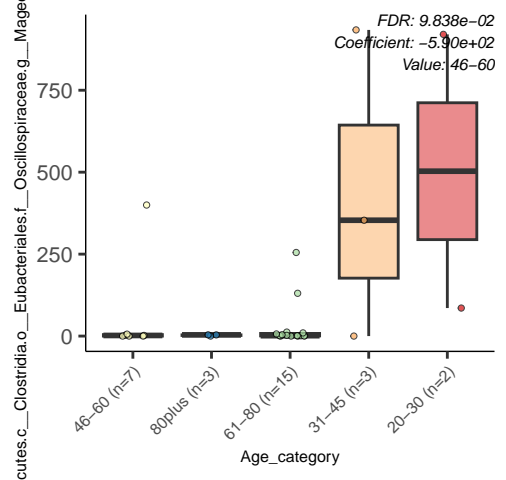



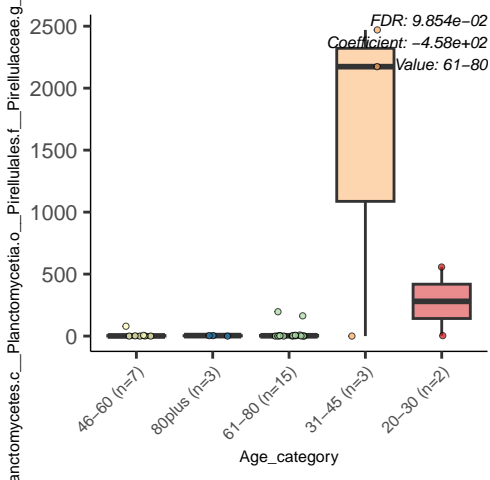

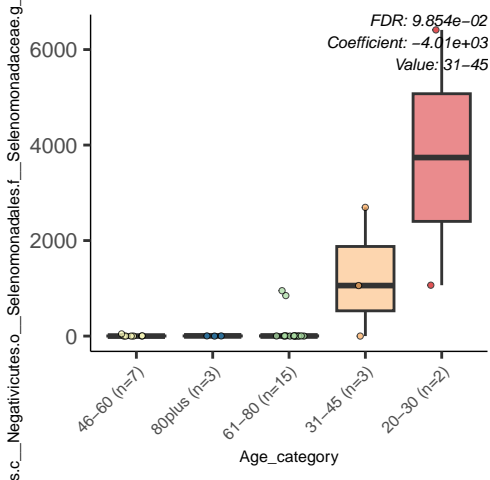

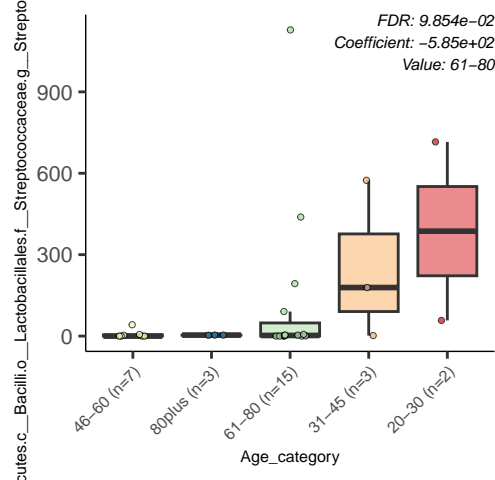

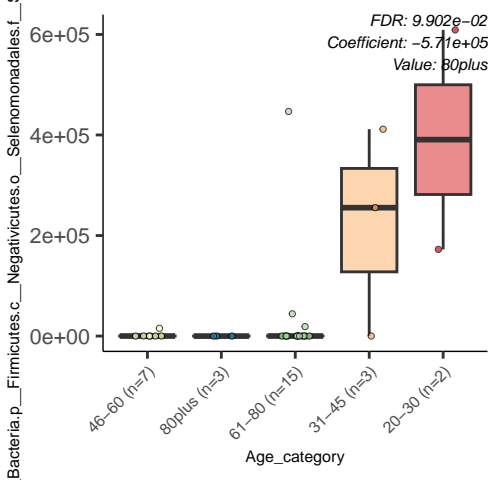

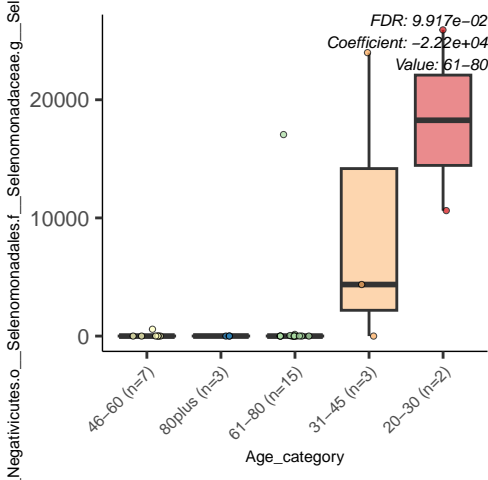

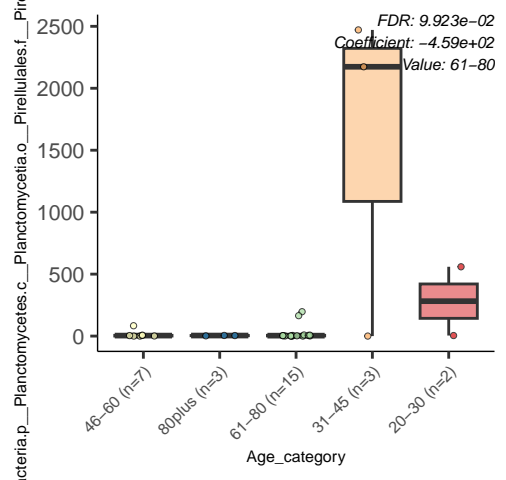

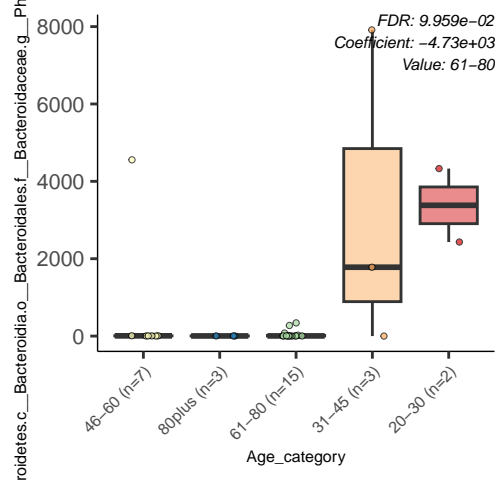

bacteria.c\_\_Fusobacteriia.o\_\_Fusobacteriales.f\_\_Leptotrichiaceae.g\_\_

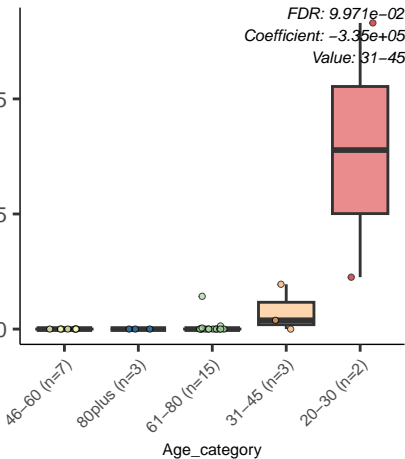



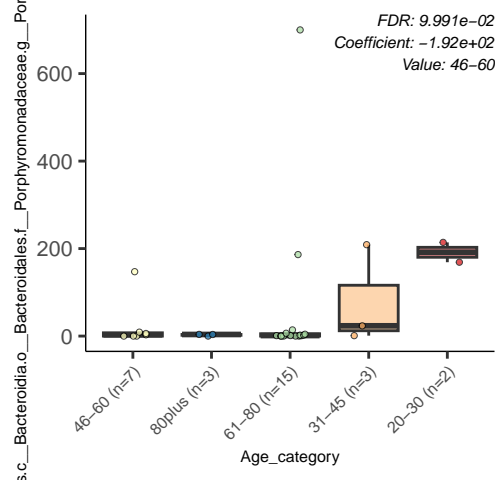

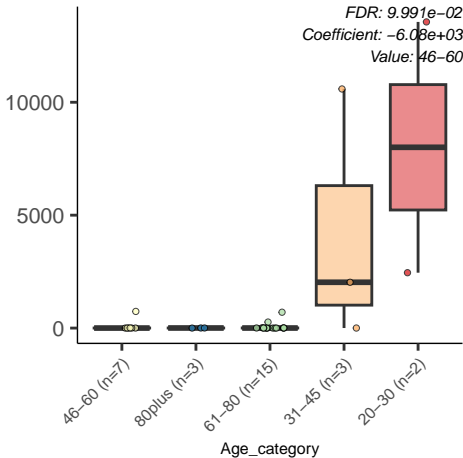

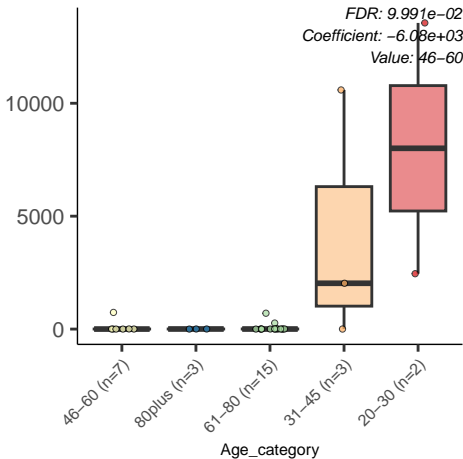

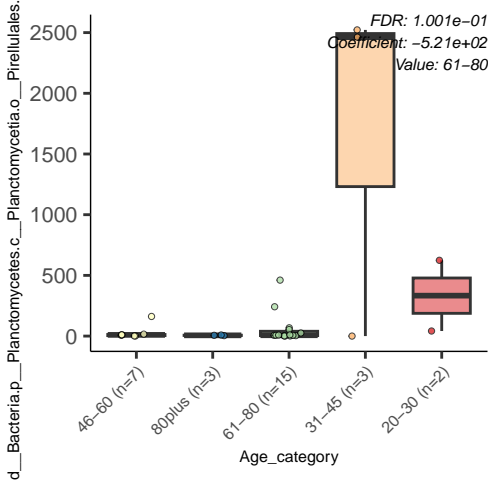

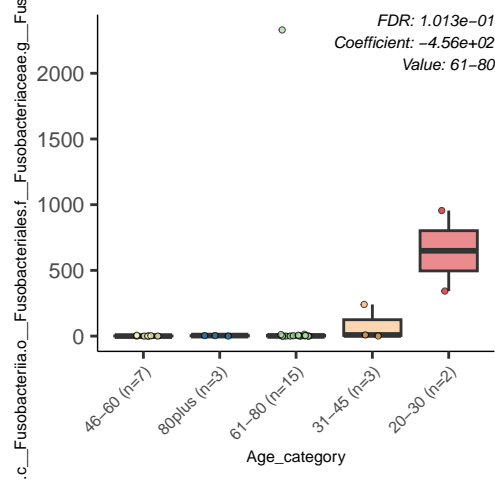

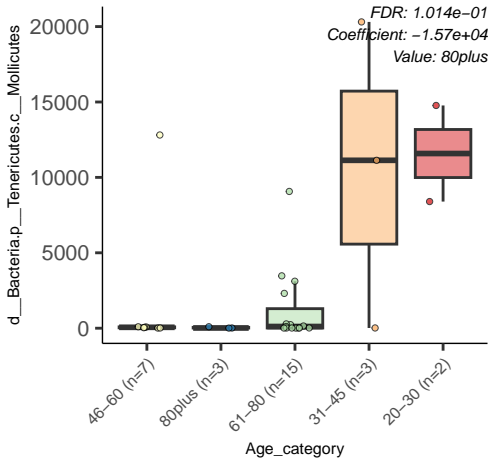

p\_Firmicutes.c\_\_Erysipelotrichia.o\_\_Erysipelotrichales.f\_\_Erysipe

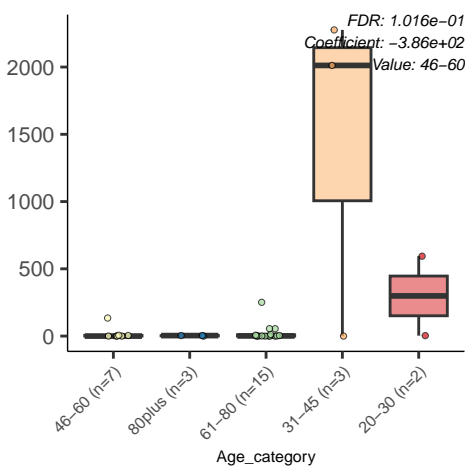

es.c\_\_Erysipelotrichia.o\_\_Erysipelotrichales.f\_\_Erysipelotrichaceae

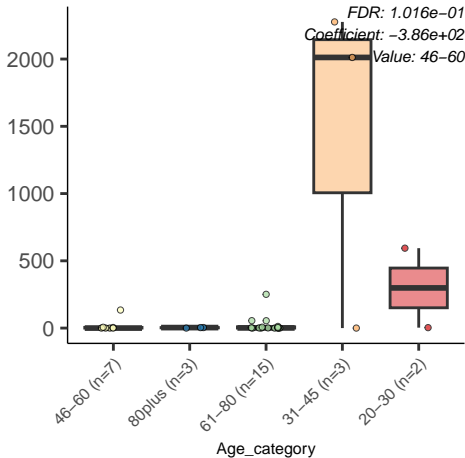



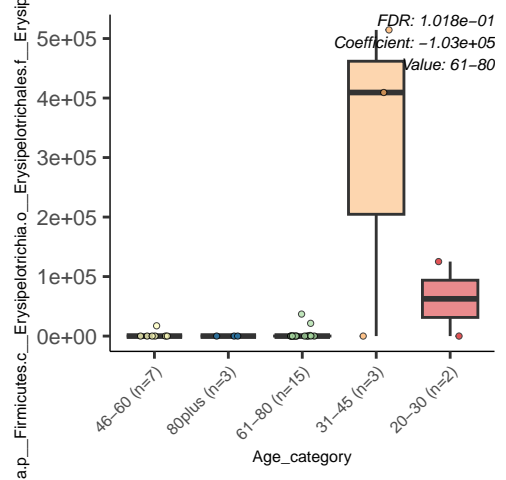

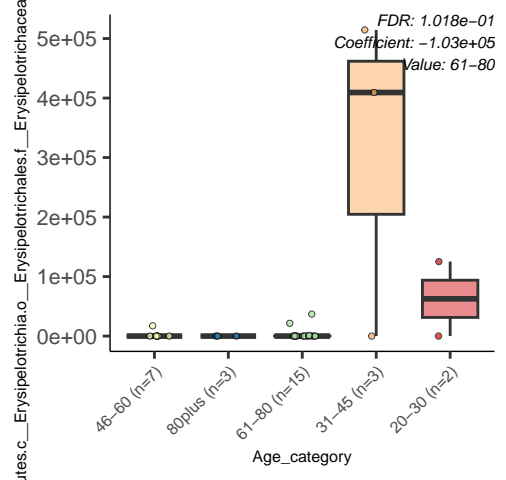

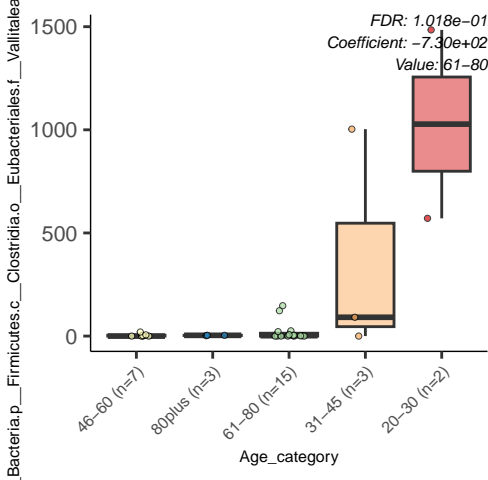

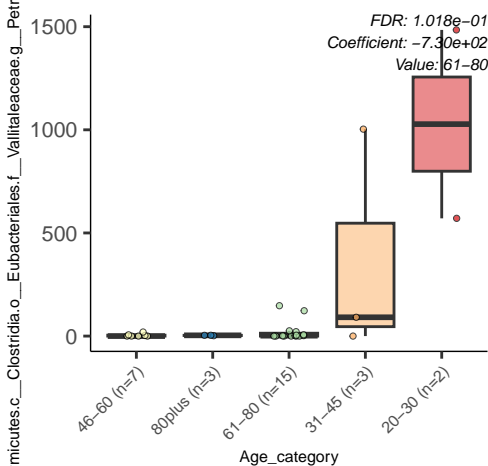

acteria.p\_\_Firmicutes.c\_\_Bacilli.o\_\_Lactobacillales.f\_\_Lactobacillaceae

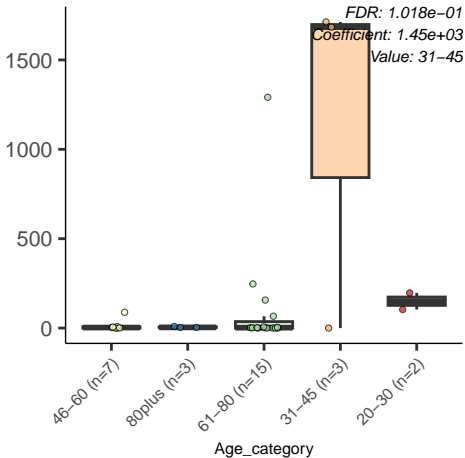

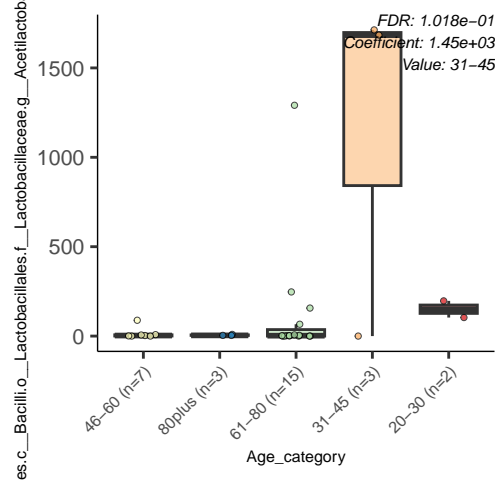

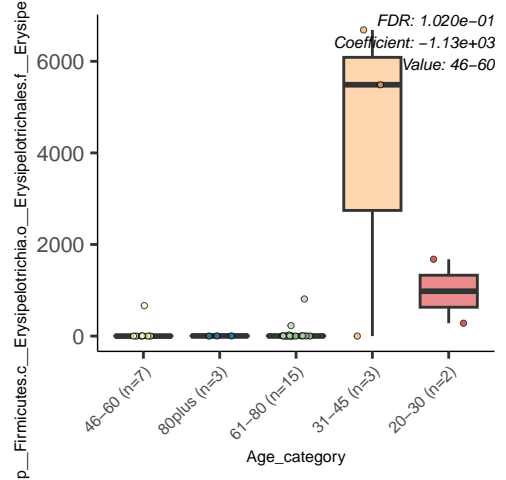

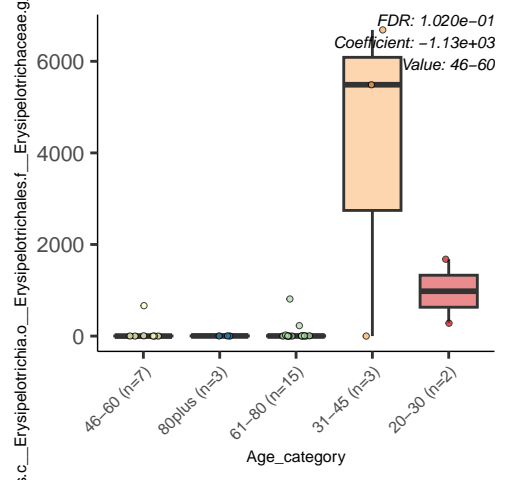



ia.c\_\_Deltaproteobacteria.o\_\_Desulfobacterales.f\_\_Desulfobulbac

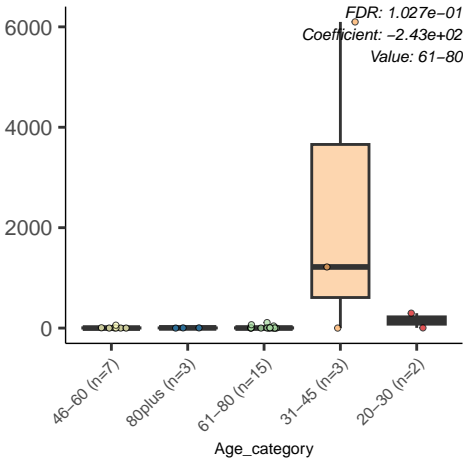

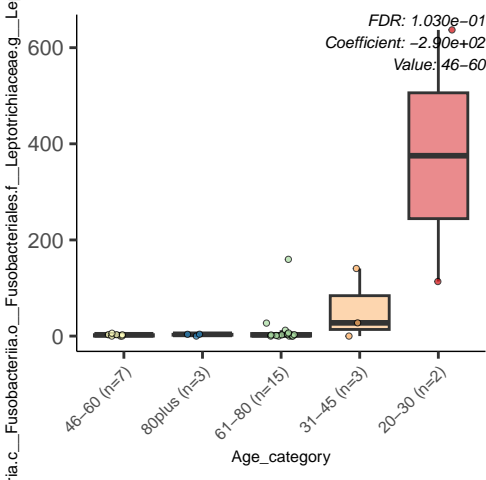

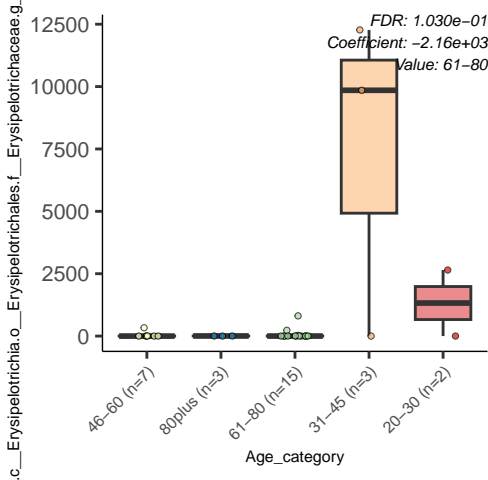

bacteria.p\_\_Firmicutes.c\_\_Clostridia.o\_\_Eubacteriales.f\_\_Lachnospir

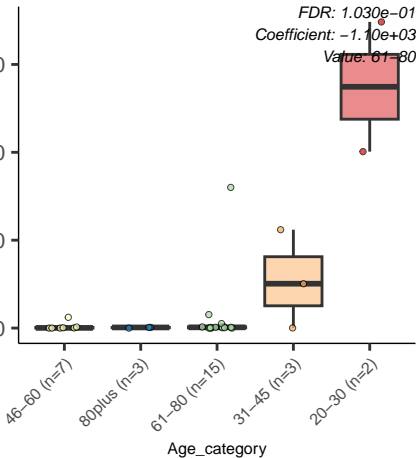

micutes.c\_\_Clostridia.o\_\_Eubacteriales.f\_\_Lachnospiraceae.g\_\_Se

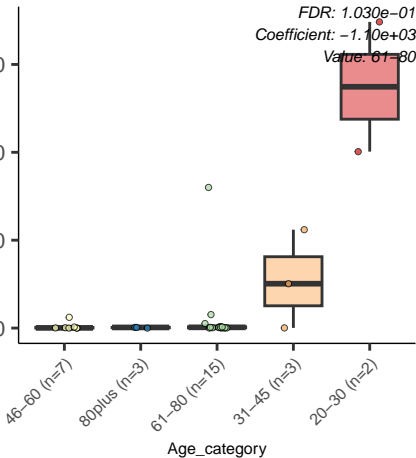

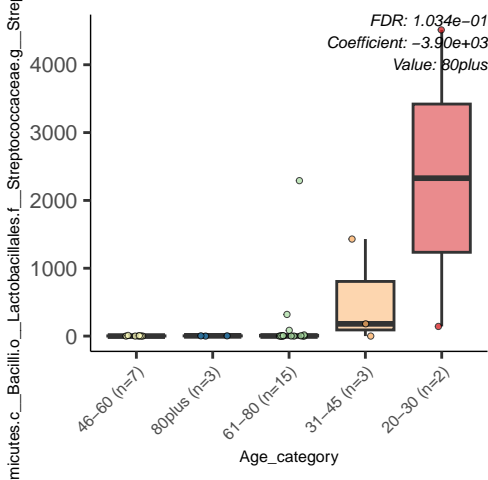

d\_\_Bacteria.p\_\_Planctomycetes.c\_\_Planctomycetia.o\_\_Planct

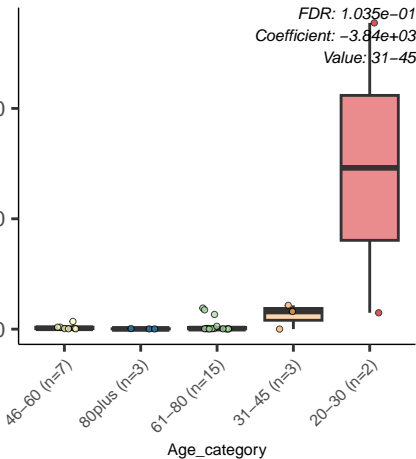

acteria.p\_\_Planctomycetes.c\_\_Planctomycetia.o\_\_Planctomycetales.

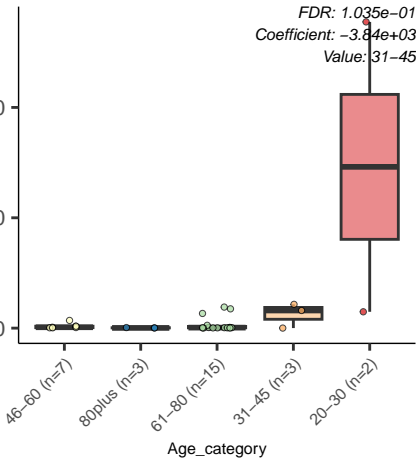



ilonproteobacteria.o\_\_Campylobacterales.f\_\_Campylobacteraceae.g

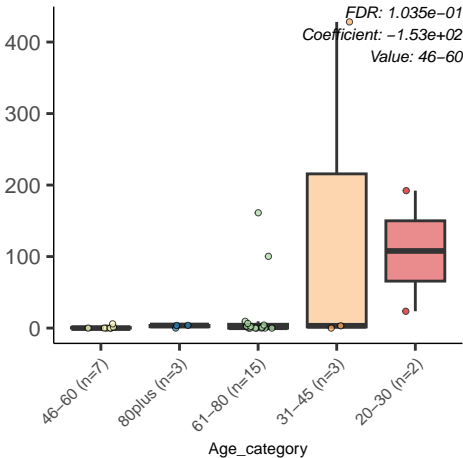

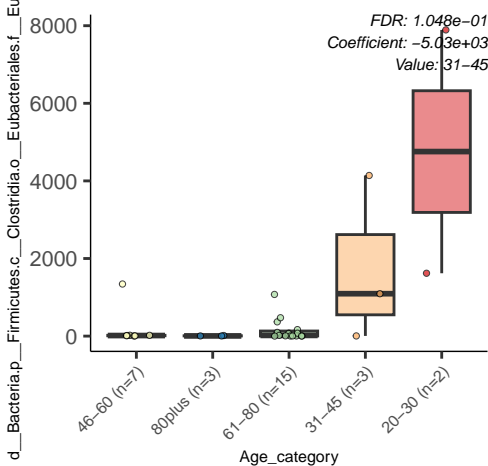

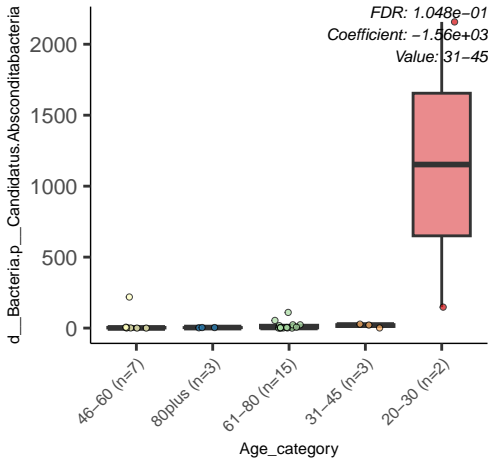

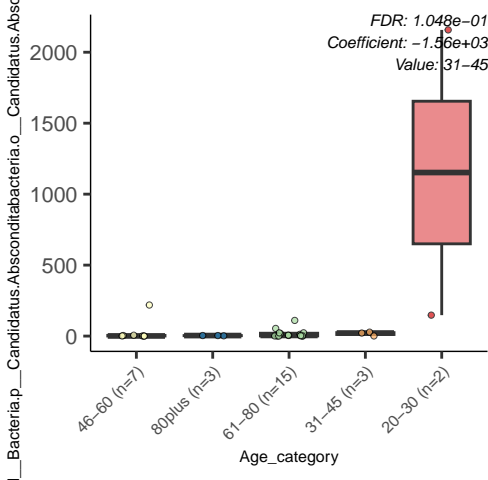

ndidatus.Absconditabacteria.o\_\_Candidatus.Absconditabacteriales.f.

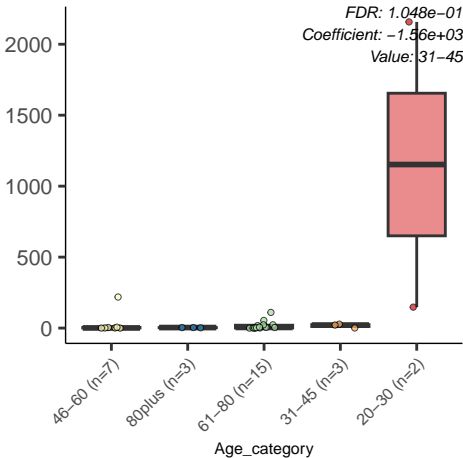

ditabacteria.o\_\_Candidatus.Absconditabacterales.f\_\_Candidatus.Ab

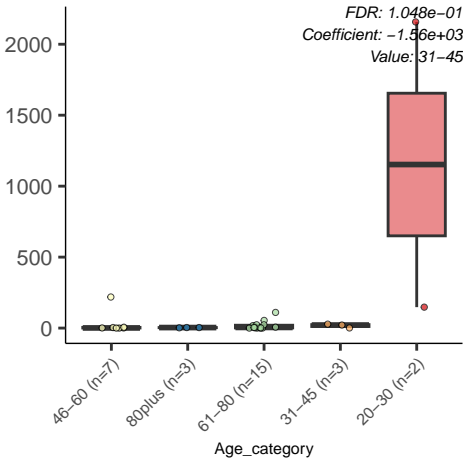

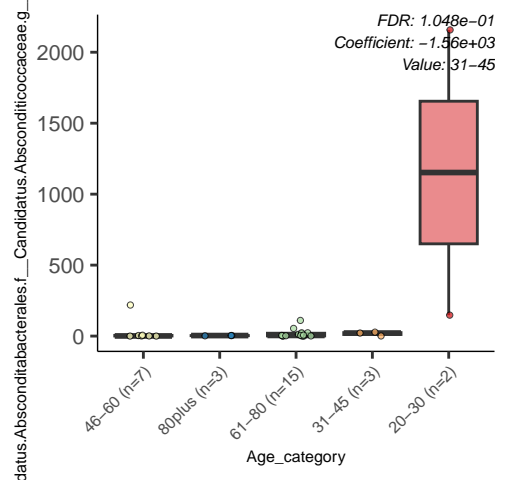

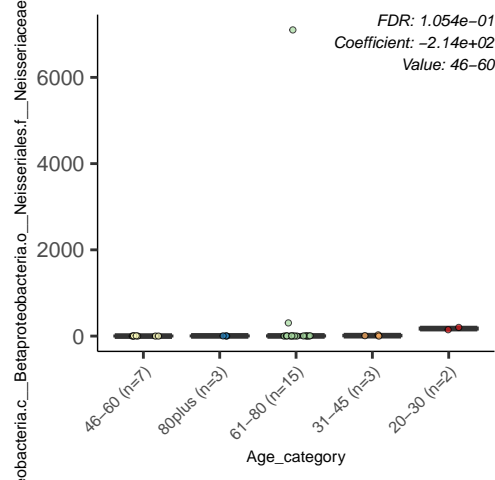



Firmicutes.c\_\_Clostridia.o\_\_Eubacteriales.f\_\_Lachnospiraceae.g\_\_

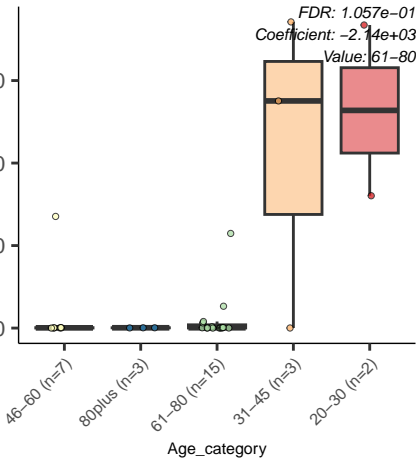

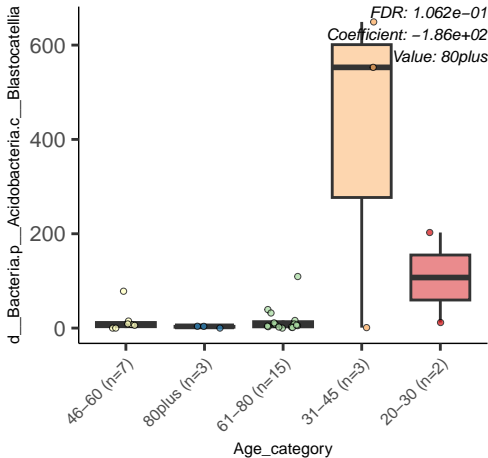

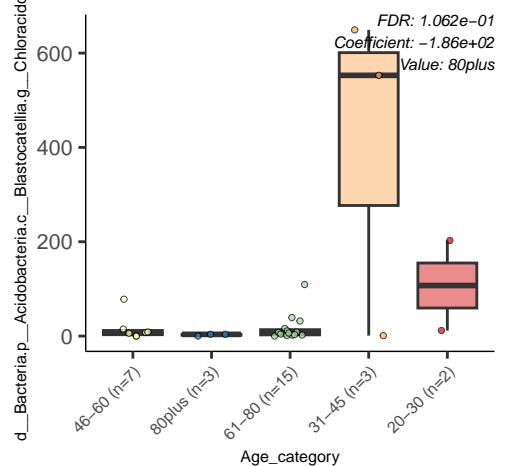

icutes.c\_\_Tissierellia.o\_\_Tissierellales.f\_\_Peptoniphilaceae.g\_\_Ana

*FDR: 1.069e-01*  
*Coefficient: 1.39e+03*  
*Value: 80plus*

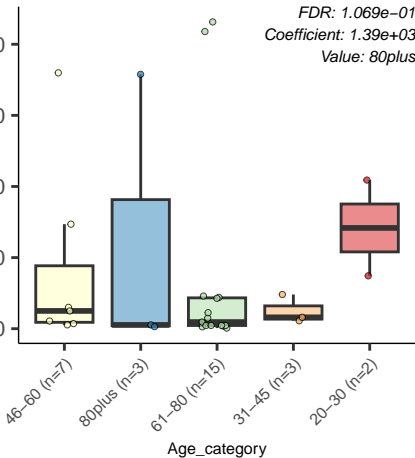

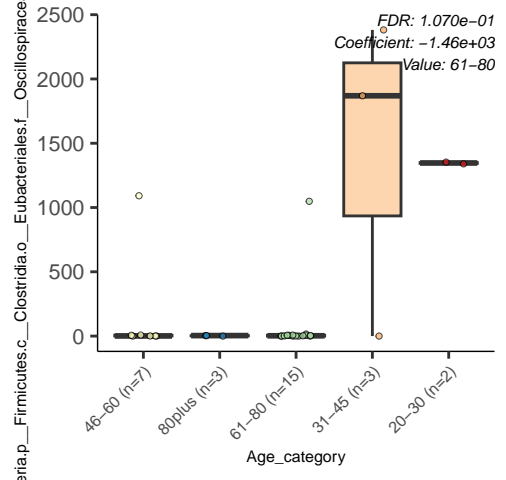

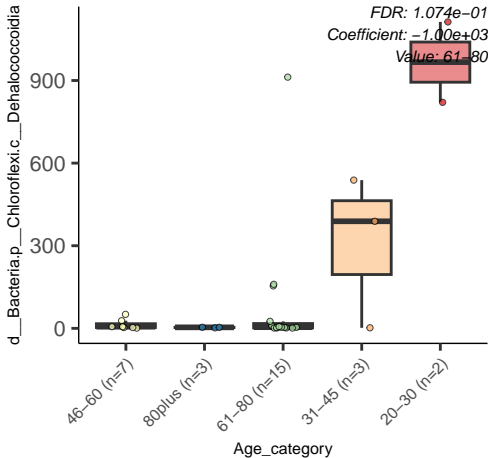

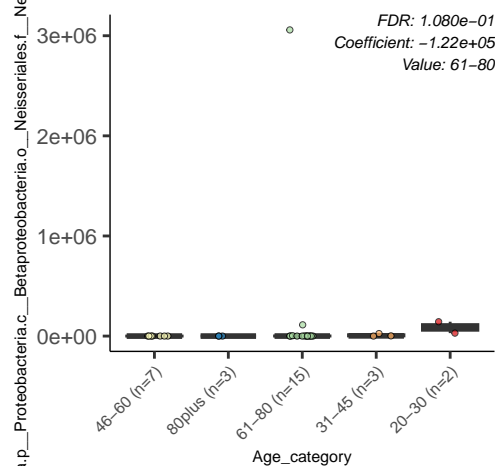

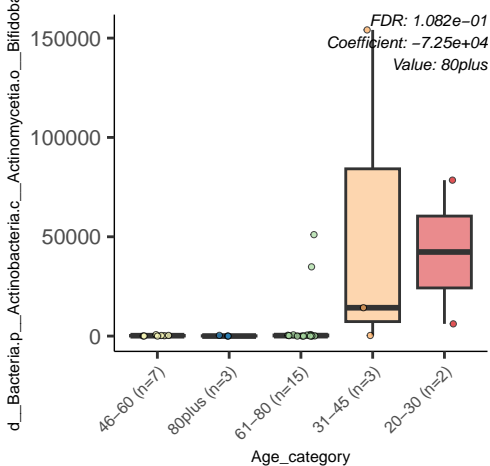



Bacteria.p\_Actinobacteria.c\_Actinomycetia.o\_Bifidobacteriales.f

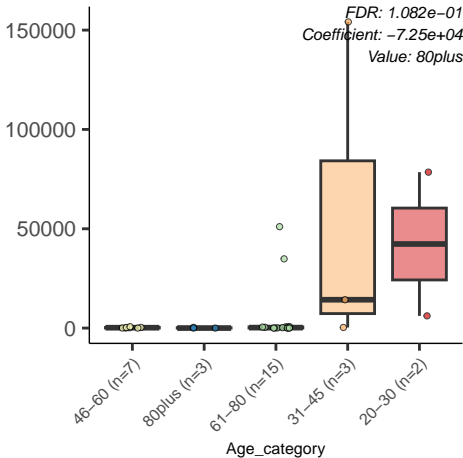

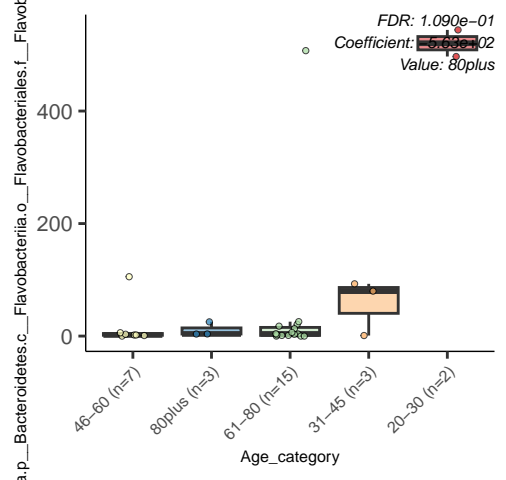

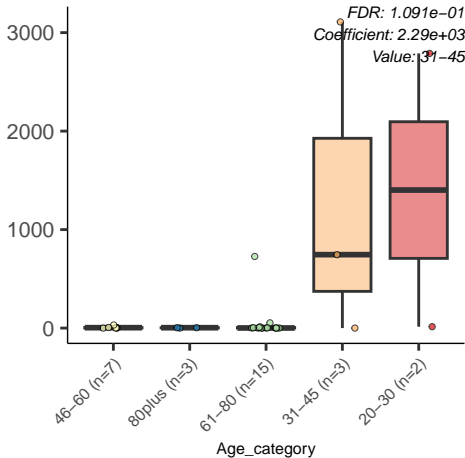

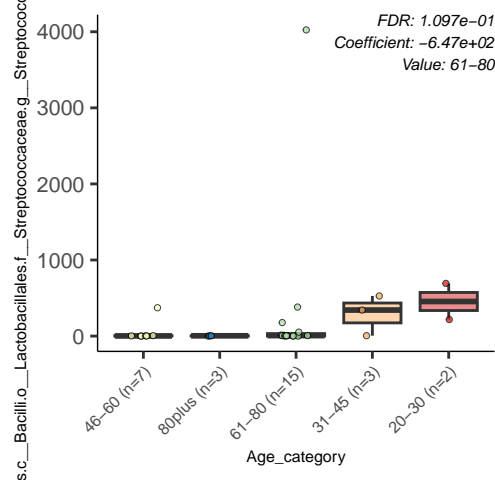

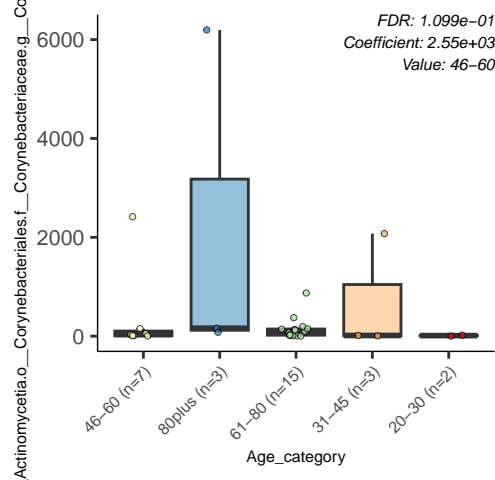

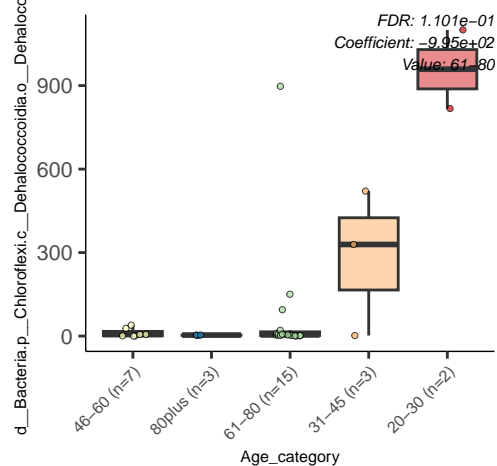

bacteria.p\_\_Chloroflexi.c\_\_Dehalococcoidia.o\_\_Dehalococcoidales.f

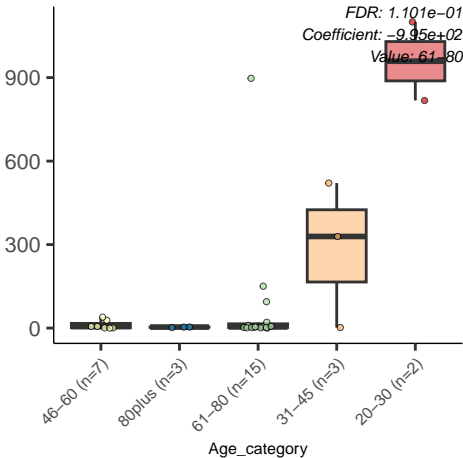

Chloroflexi.c\_\_Dehalococcoidia.o\_\_Dehalococcoidales.f\_\_Dehaloco

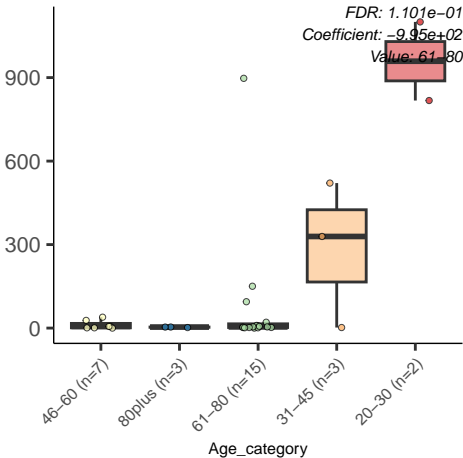



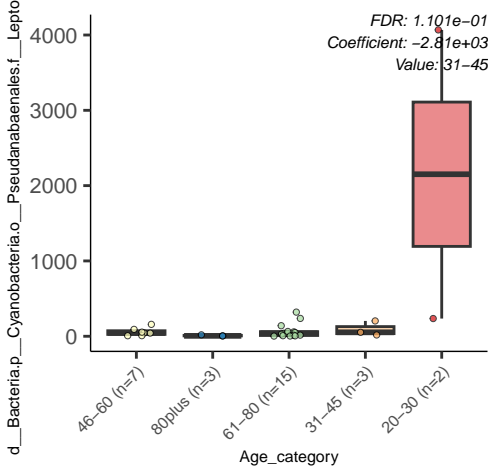

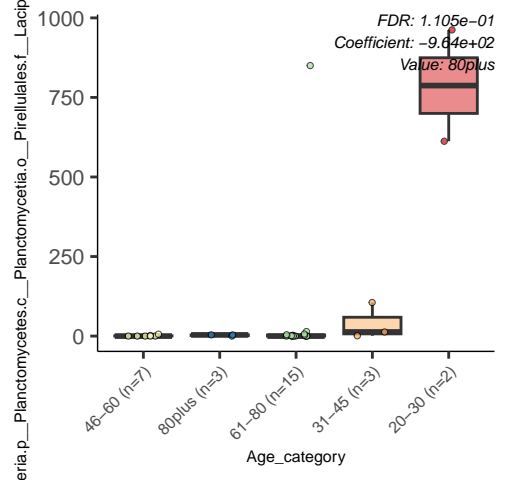

ctomycetes.c\_\_Planctomycetia.o\_\_Pirellulales.f\_\_Lacipirellulaceae.

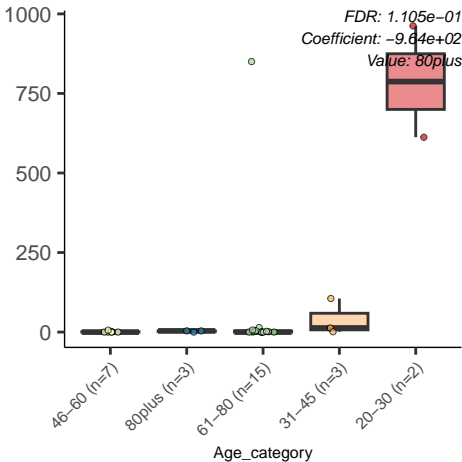

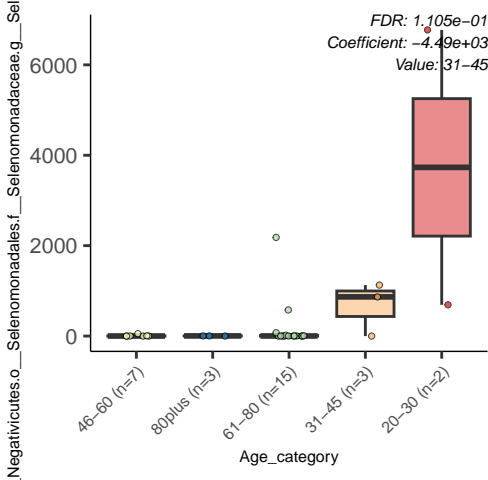

eria.c\_Actinomycetia.o\_Actinomycetales.f\_Actinomycetaceae.g

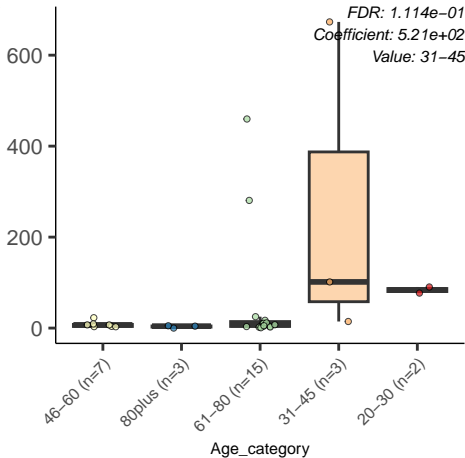

p\_\_Firmicutes.c\_\_Erysipelotrichia.o\_\_Erysipelotrichales.f\_\_Erysipe

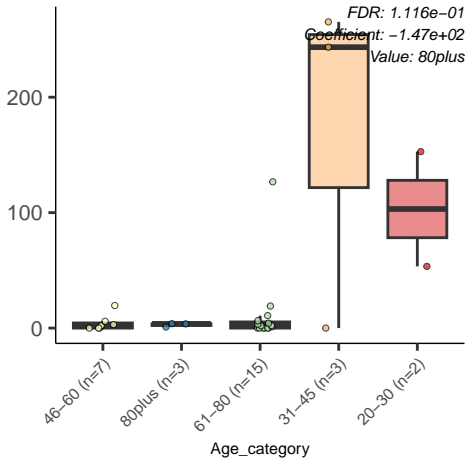

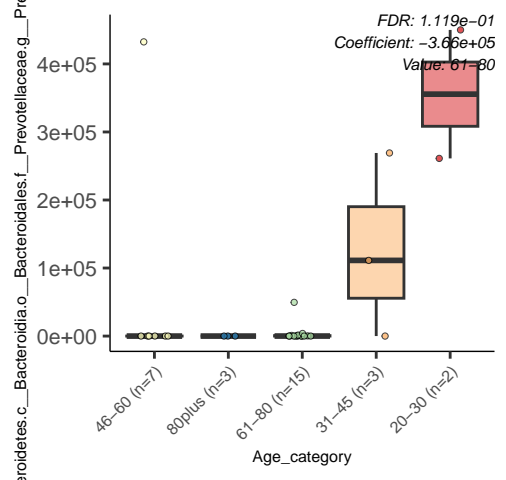

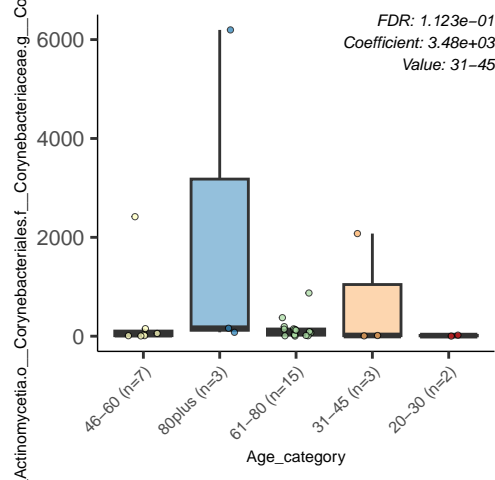



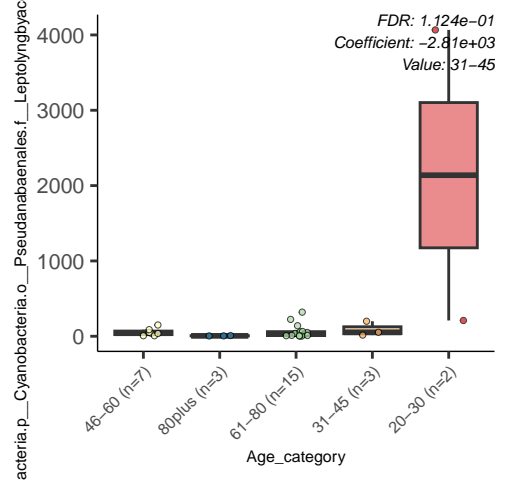

detes.c\_\_Flavobacteriia.o\_\_Flavobacteriales.f\_\_Flavobacteriaceae.g

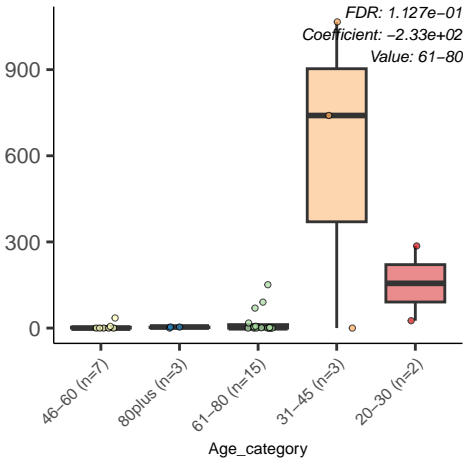

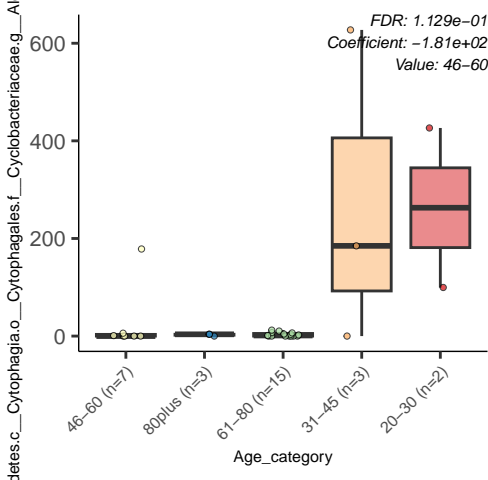

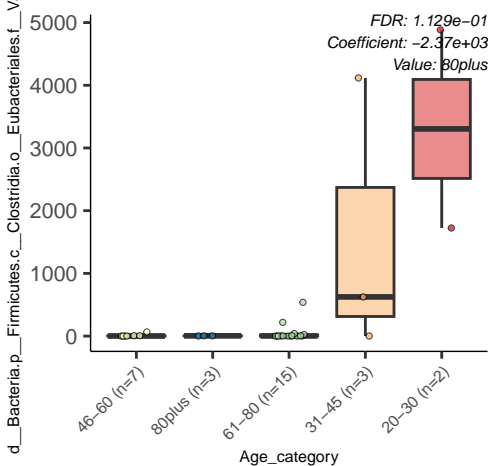

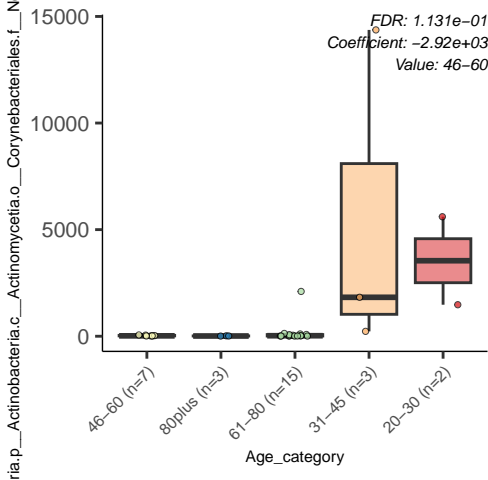

d\_\_Bacteria.p\_\_Tenericutes

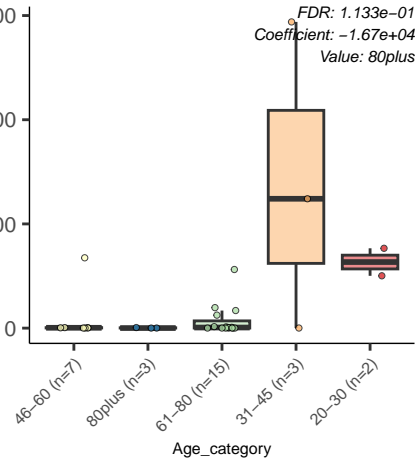

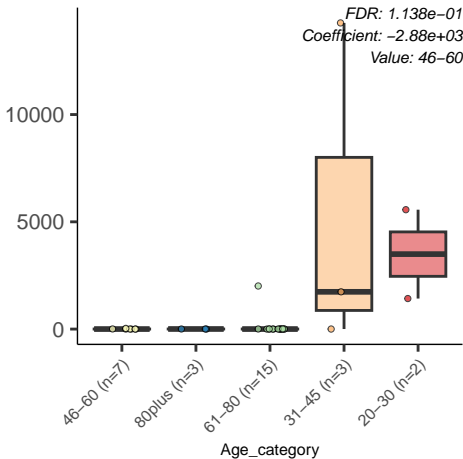

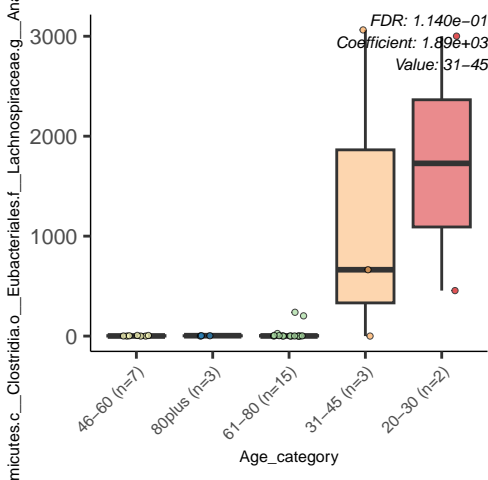



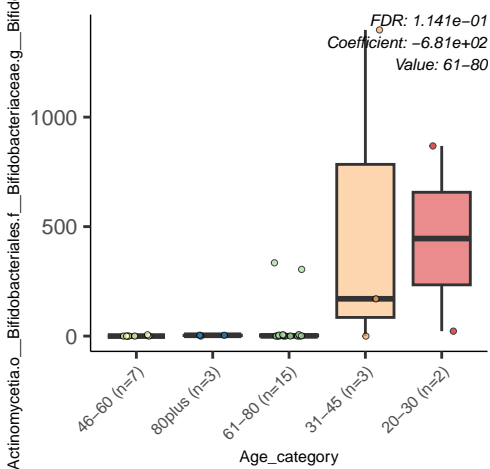

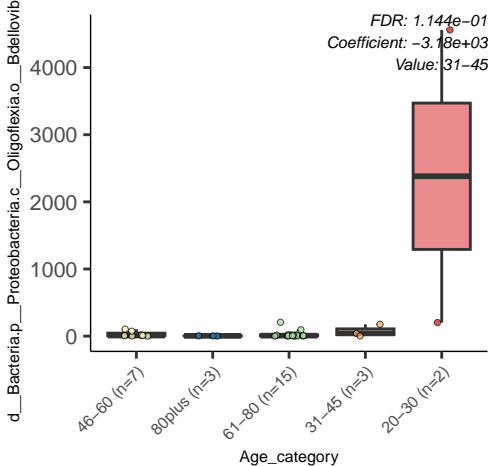

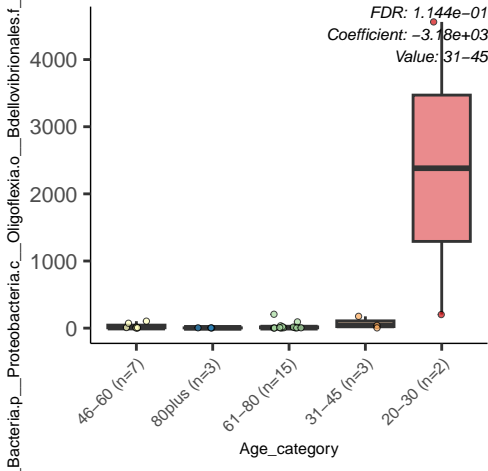

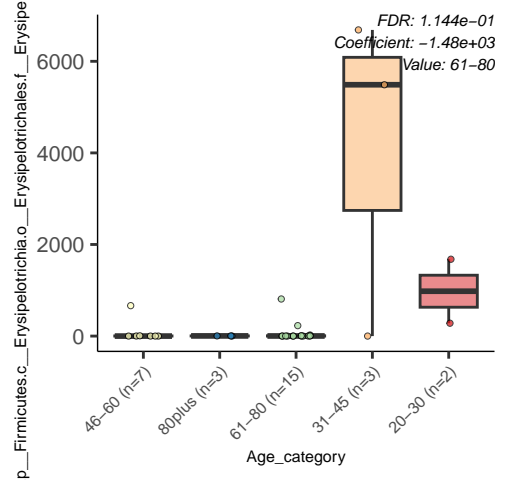

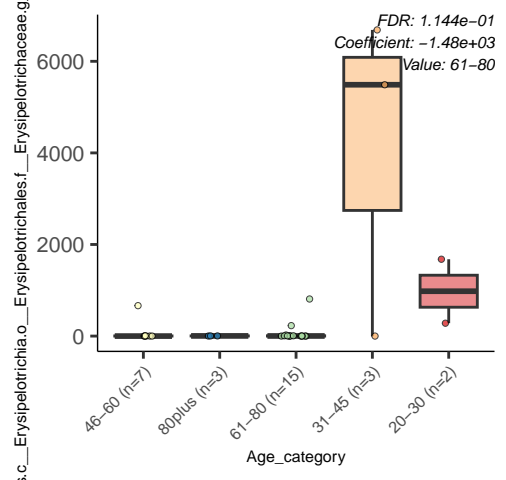

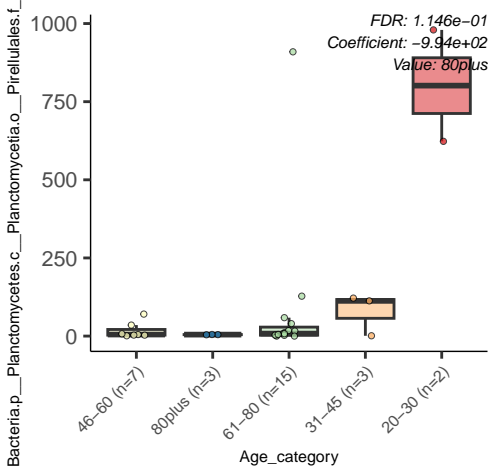

a.p\_\_Proteobacteria.c\_\_Oligoflexia.o\_\_Bdellovibrionales.f\_\_Bdellov

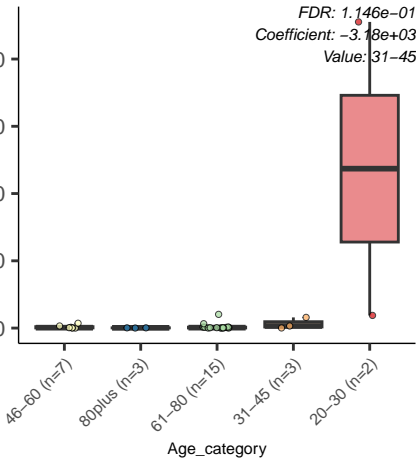

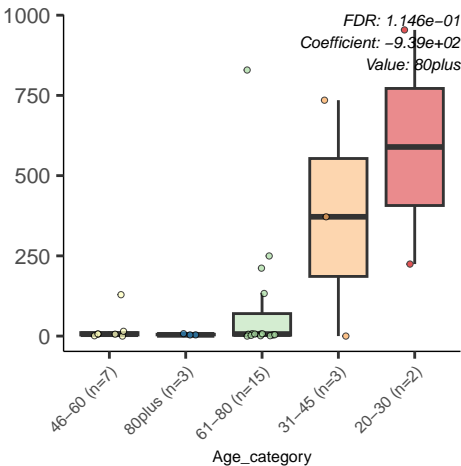



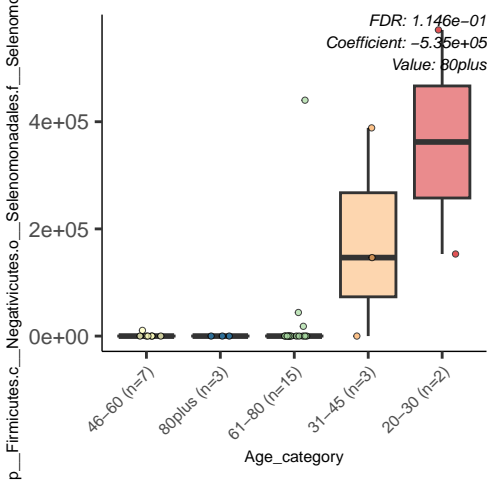

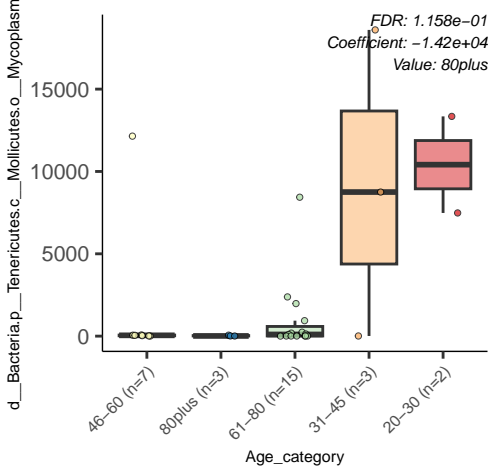

Bacteria.p\_\_Tenericutes.c\_\_Mollicutes.o\_\_Mycoplasmales.f\_\_M

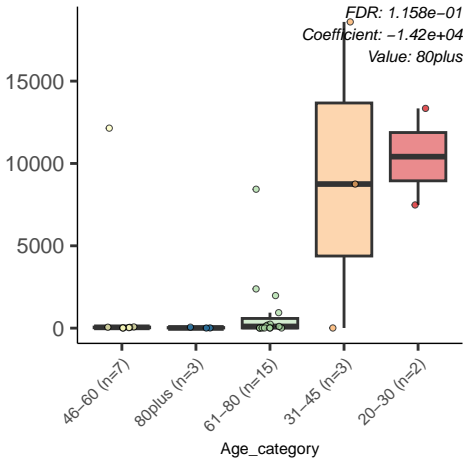

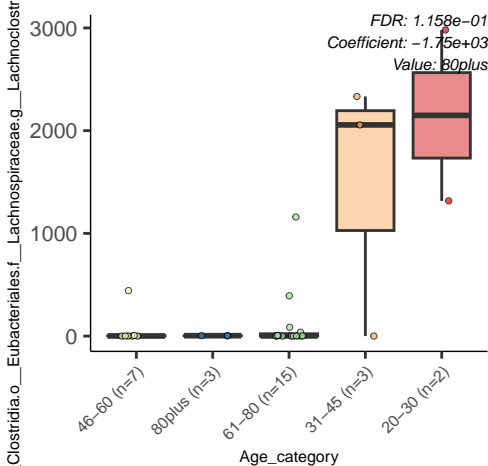

icutes.c\_\_Bacilli.o\_\_Lactobacillales.f\_\_Streptococcaceae.g\_\_Strept

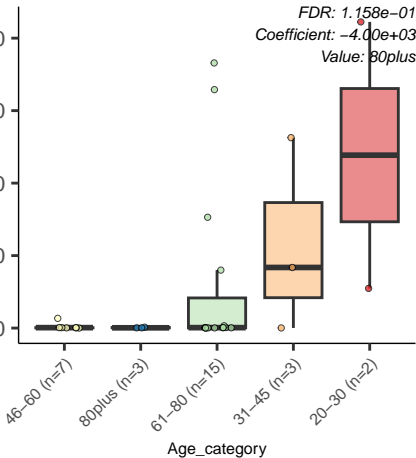

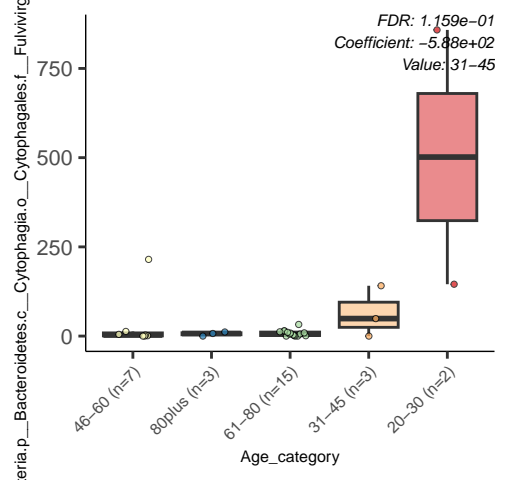

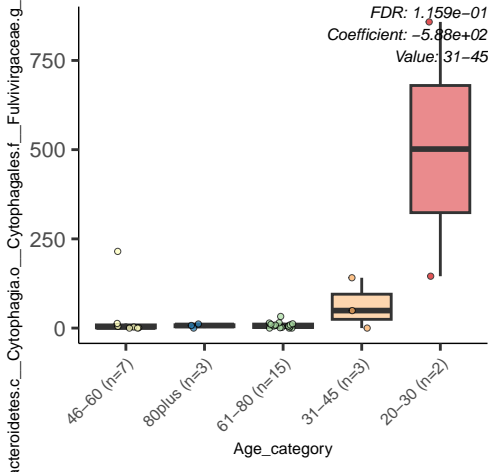

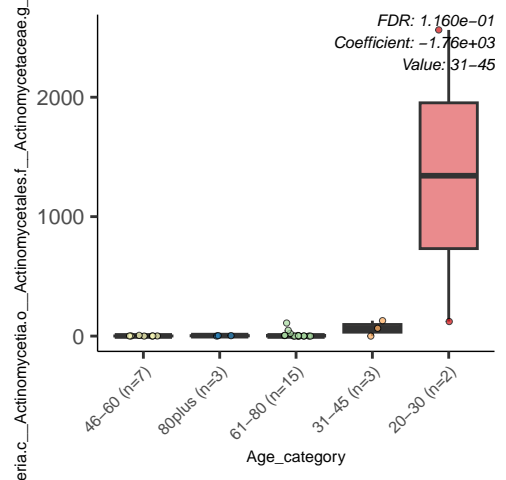



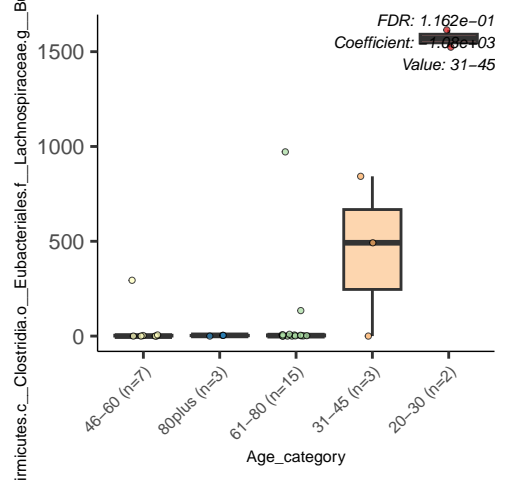

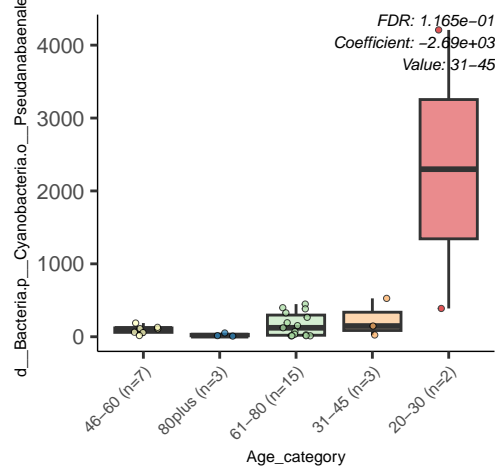

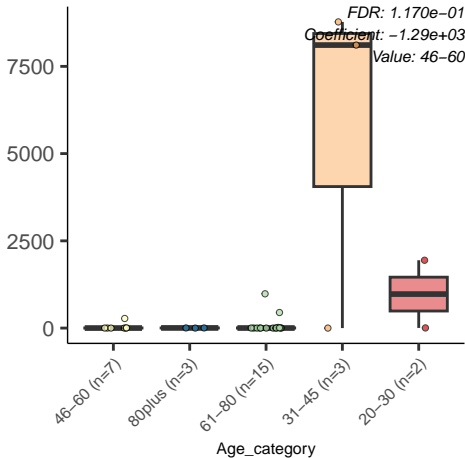

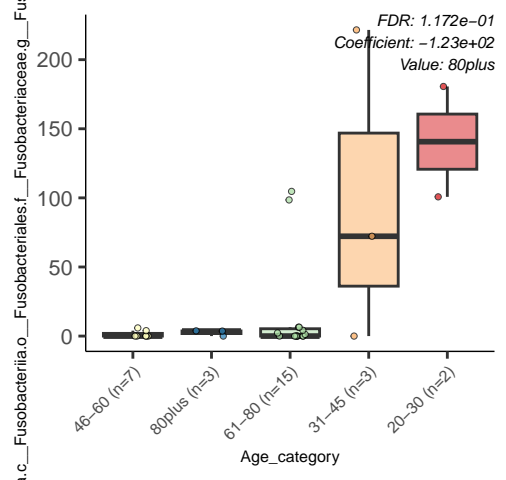

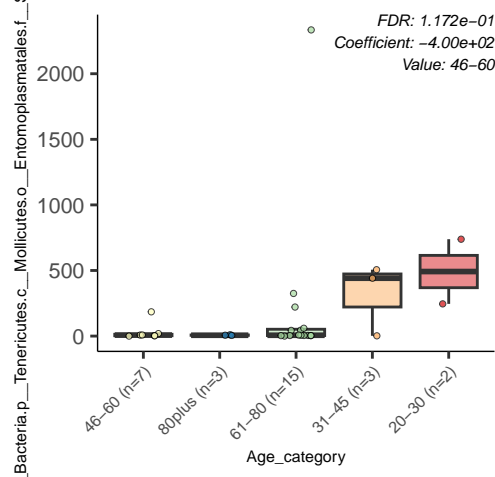

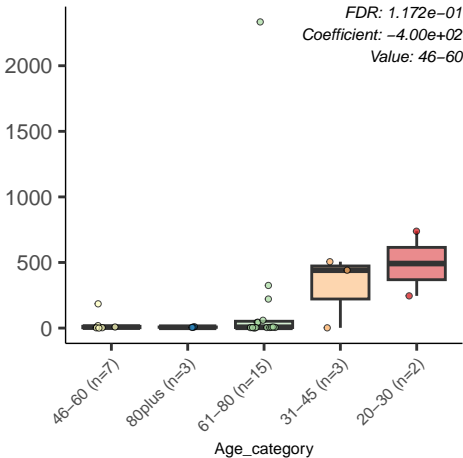

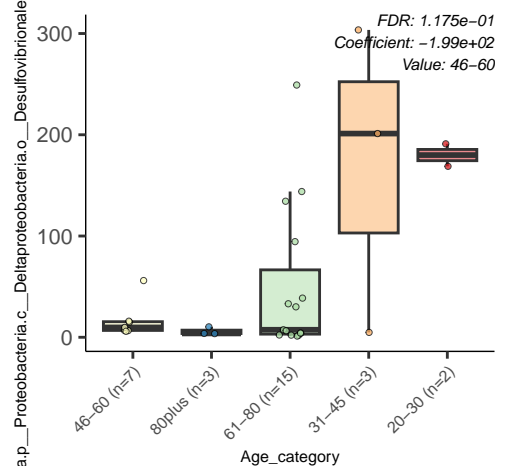

acteria.p\_\_Firmicutes.c\_\_Clostridia.o\_\_Eubacteriales.f\_\_Lachnospira

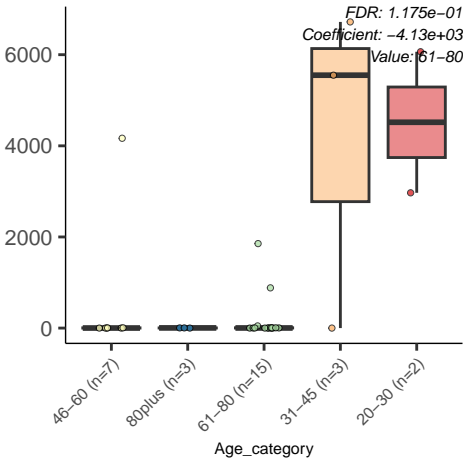



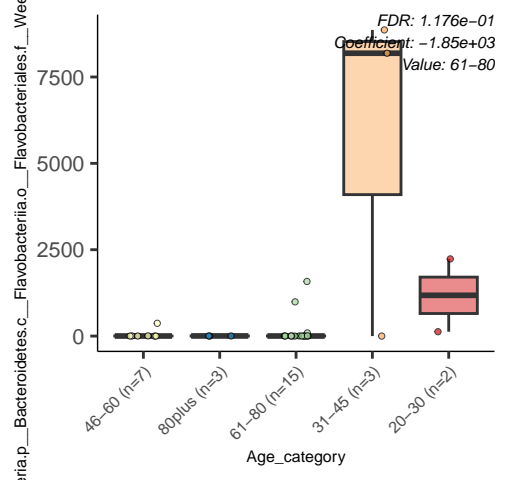

eria.p\_\_Proteobacteria.c\_\_Alphaproteobacteria.o\_\_Rhodobacterales

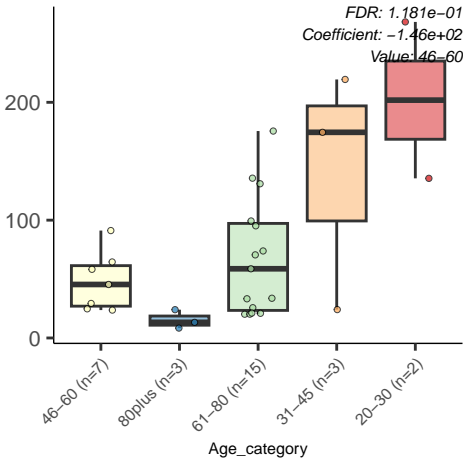

bacteria.p\_\_Proteobacteria.c\_\_Betaproteobacteria.o\_\_Neisseriales.f

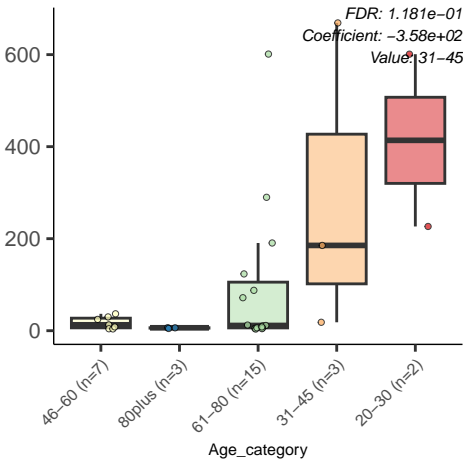

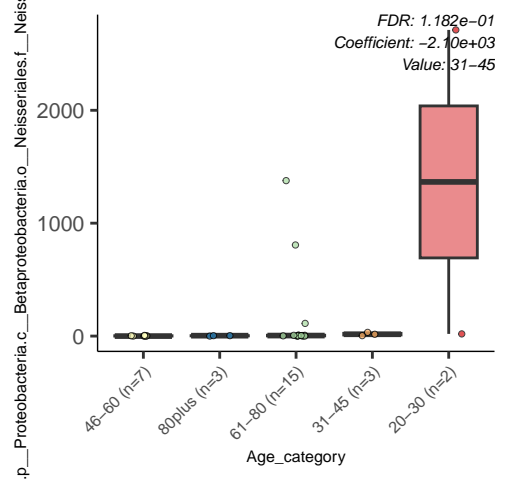

bacteria.c\_\_Betaproteobacteria.o\_\_Neisseriales.f\_\_Neisseriaceae.g

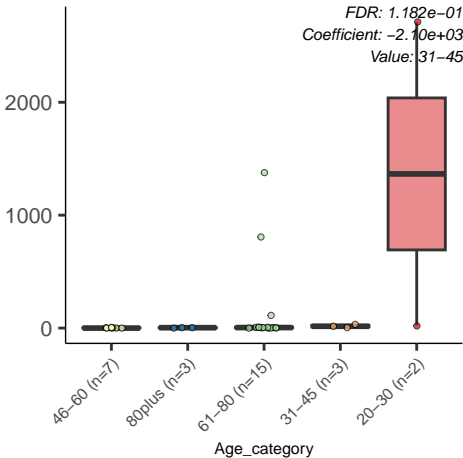

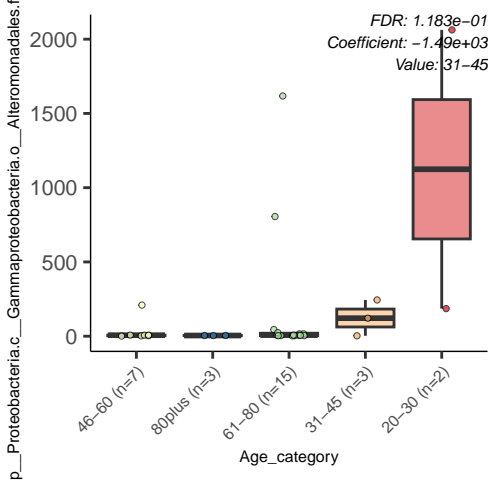

ctinomycetia.o\_\_Corynebacteriales.f\_\_Corynebacteriaceae.g\_\_Cor

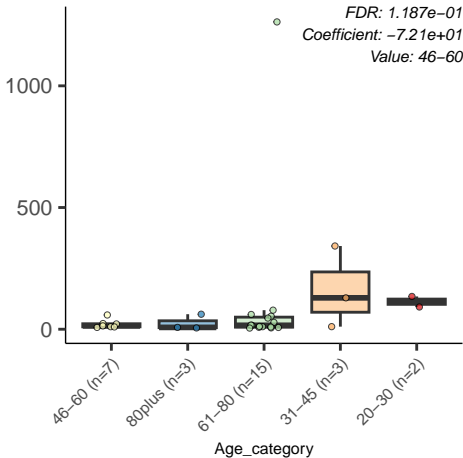

roidetes.c\_\_Bacteroidia.o\_\_Bacteroidales.f\_\_Bacteroidaceae.g\_\_Ba

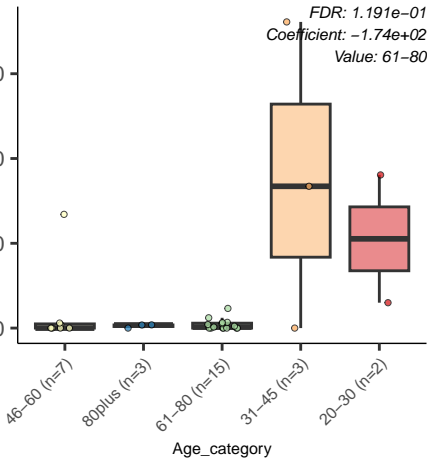



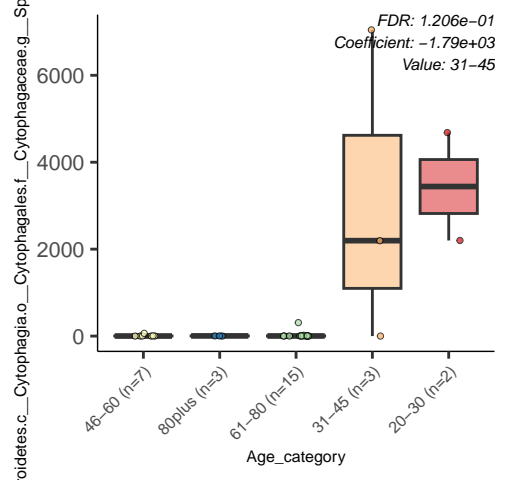

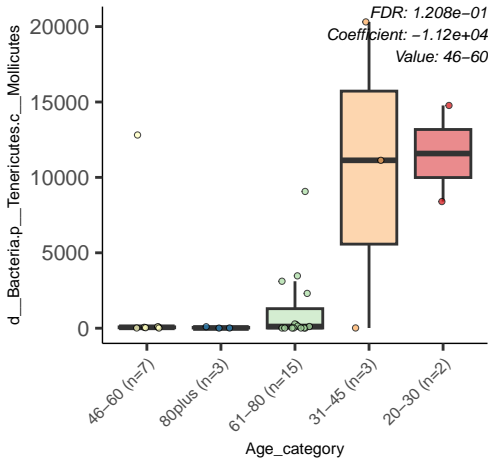

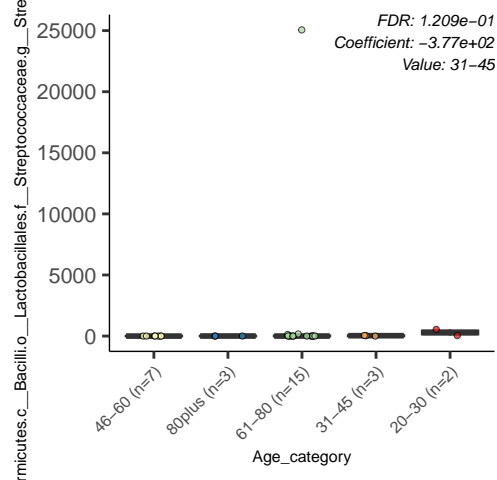

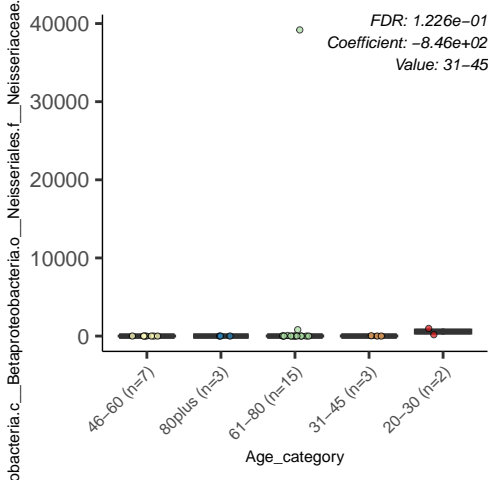

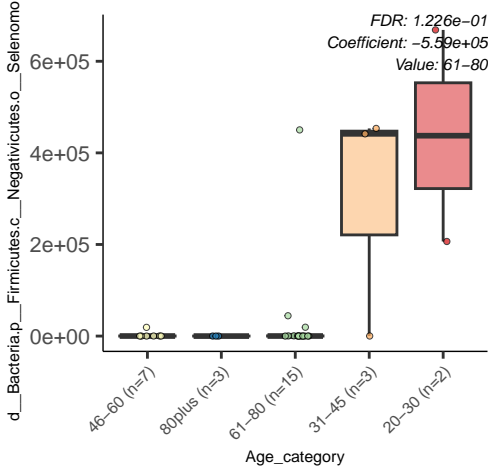

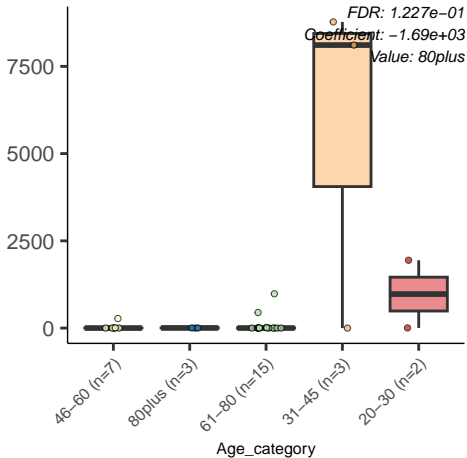

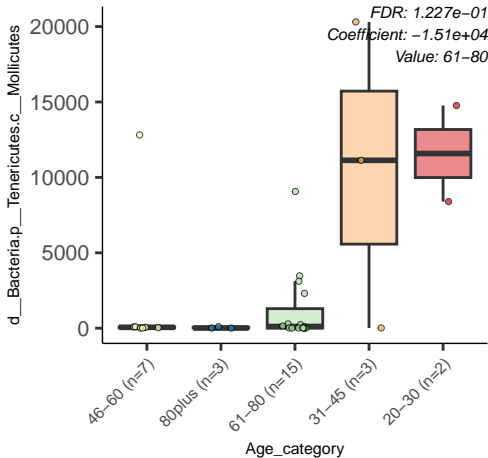

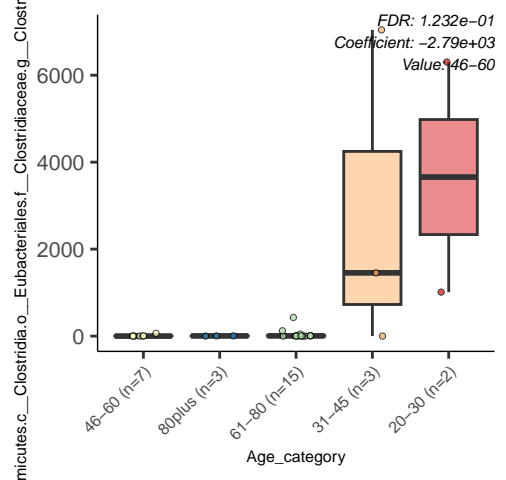



Clostridia.o\_Eubacteriales.f\_Oscillospiraceae.g\_\_Caproicibacte

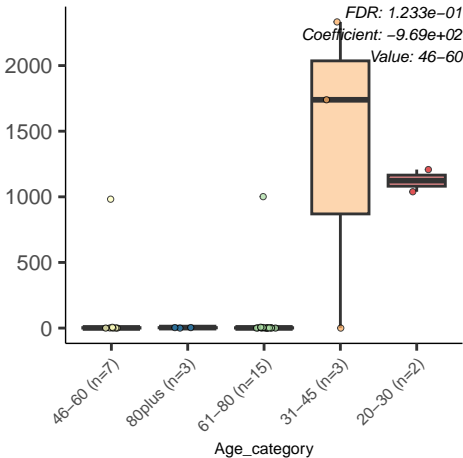

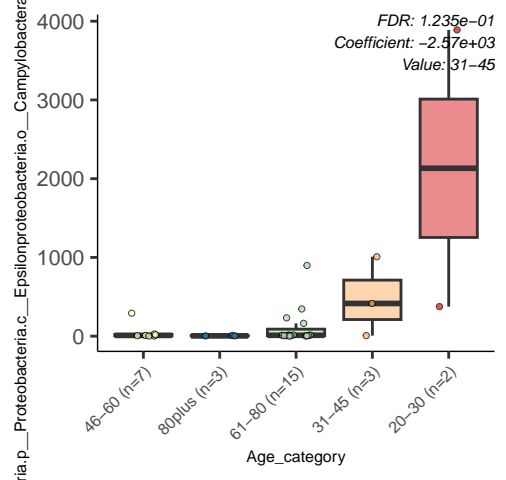

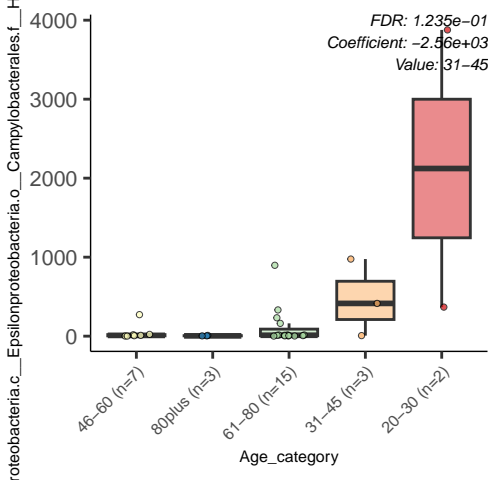

teroidetes.c\_\_Cytophagia.o\_\_Cytophagales.f\_\_Cytophagaceae.g

FDR: 1.236e-01  
Coefficient: -2.08e+02  
Value: 31-45

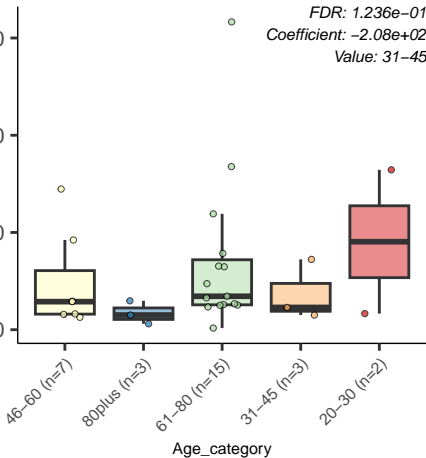

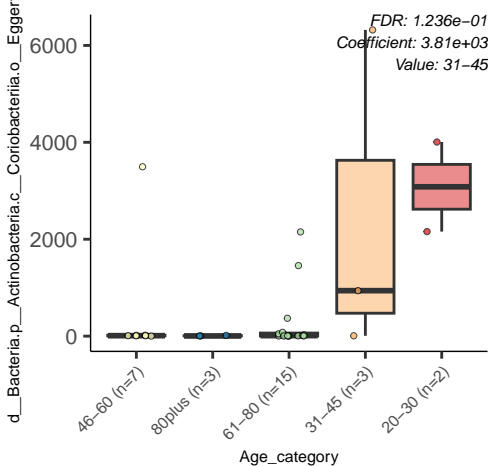

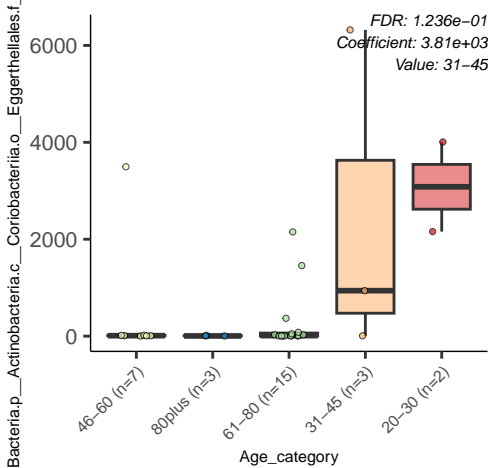

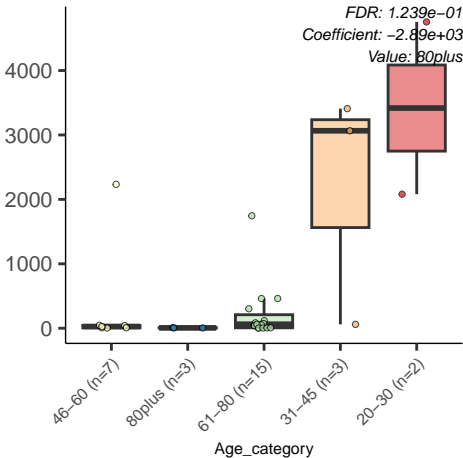

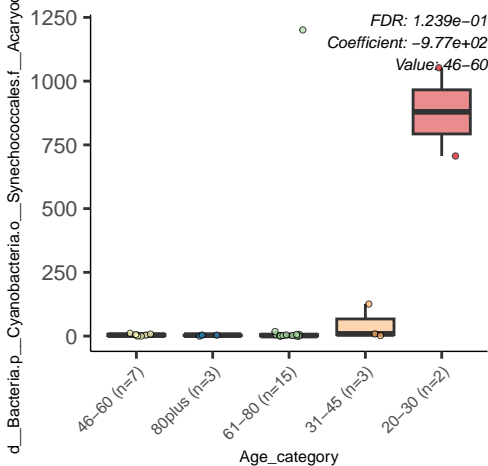



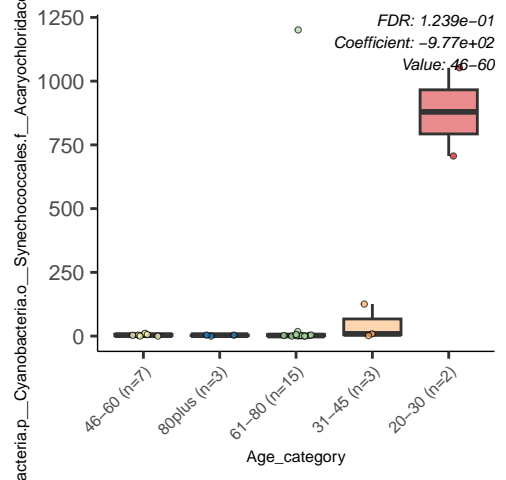

d\_\_Bacteria.p\_\_Tenericutes.c\_\_Mollicutes.o\_\_Acholeplasma

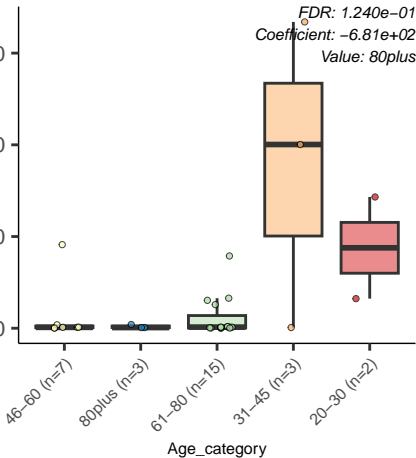

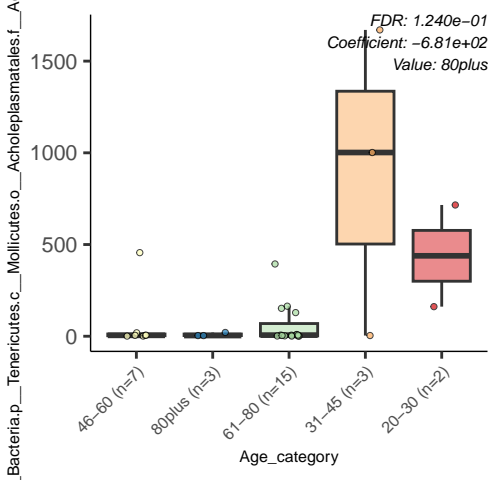

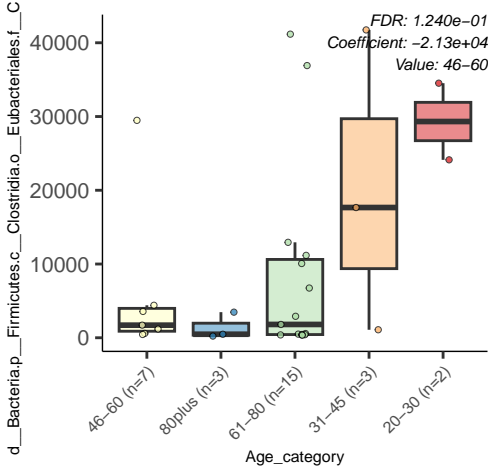

d\_\_Bacteria.p\_\_Cyanobacteria.o\_\_Nostocales.f\_\_Nostocaceae

FDR: 1.240e-01  
Coefficient: -5.92e+01  
Value: 46-60

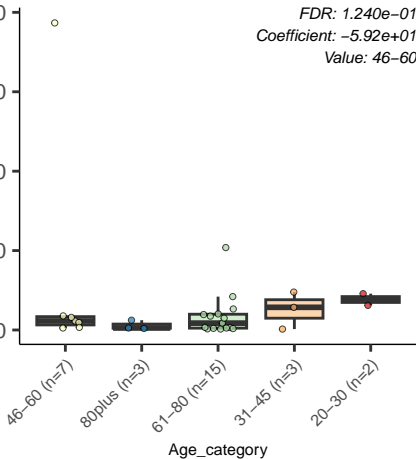

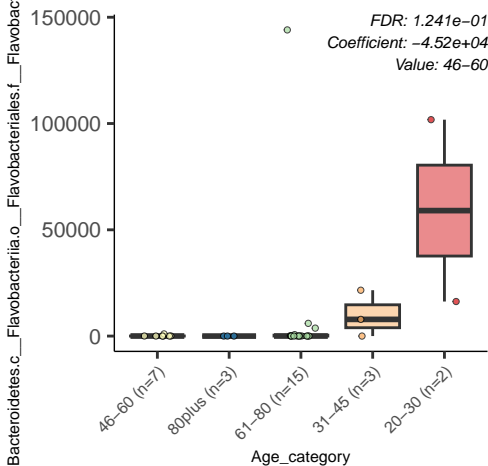

a.p\_\_Actinobacteria.c\_\_Actinomycetia.o\_\_Actinomycetales.f\_\_Actino

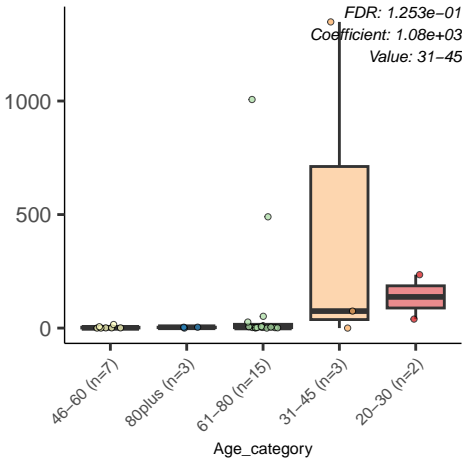

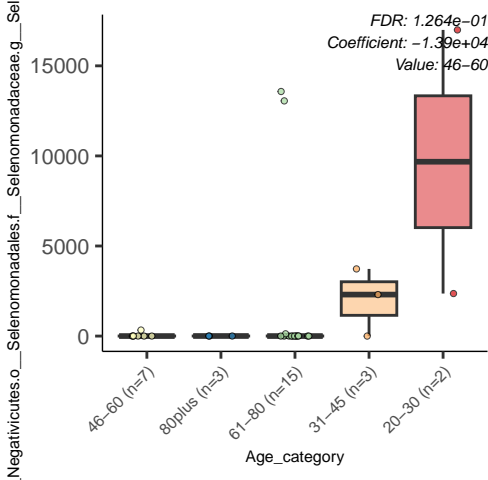



eroidetes.c\_\_Bacteroidia.o\_\_Bacteroidales.f\_\_Bacteroidaceae.g\_\_B

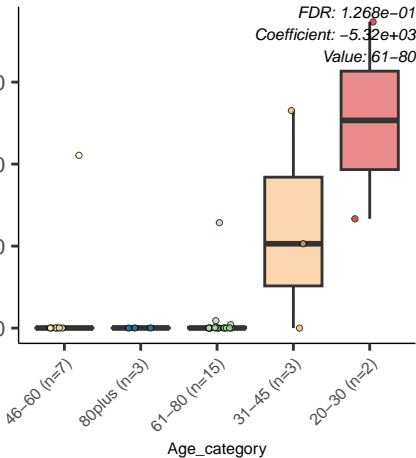

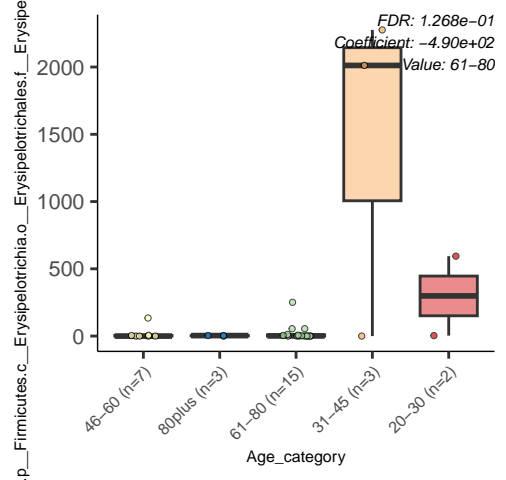

es.c\_\_Erysipelotrichia.o\_\_Erysipelotrichales.f\_\_Erysipelotrichaceae

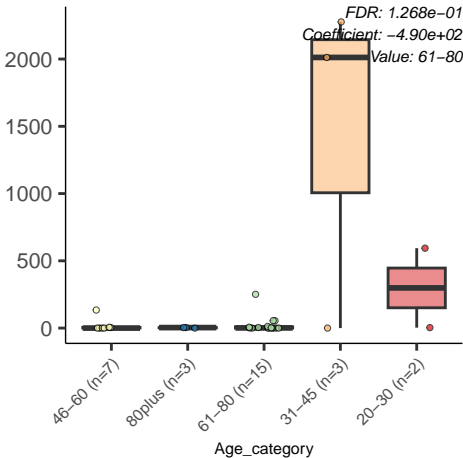

d\_Bacteria.p\_Deinococcus.Thermus.c\_Deinococci.o\_Dein

FDR: 1.275e-01  
Coefficient: -3.15e+02  
Value: 61-80

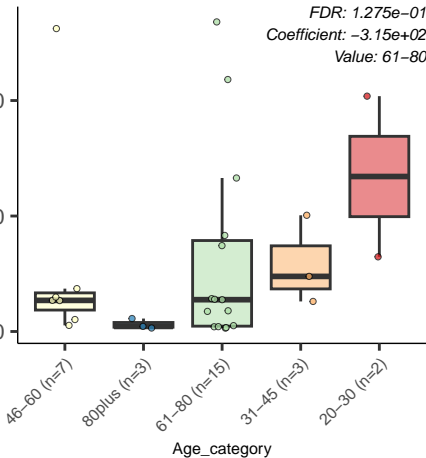

bacteria.p\_Deinococcus.Thermus.c\_Deinococci.o\_Deinococcales

FDR: 1.275e-01  
Coefficient: -3.15e+02  
Value: 61-80

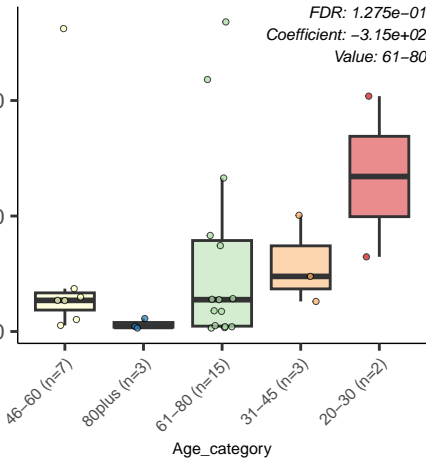

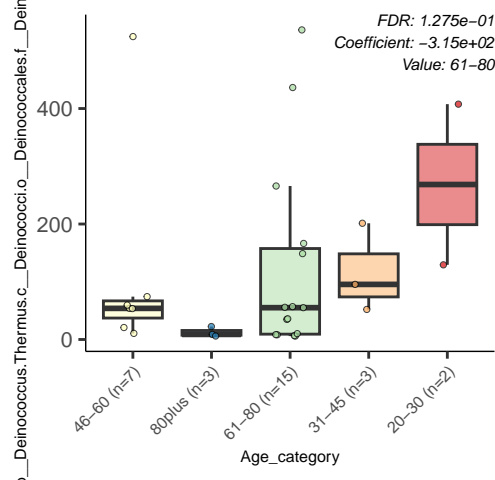

d\_\_Bacteria.p\_\_Tenericutes

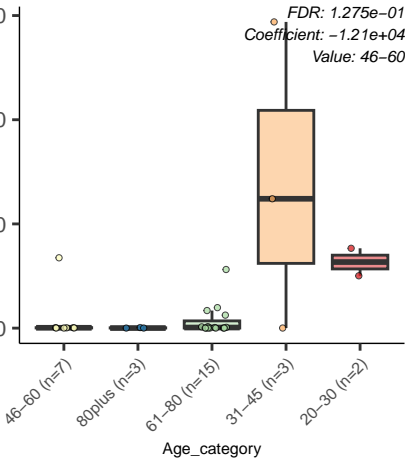

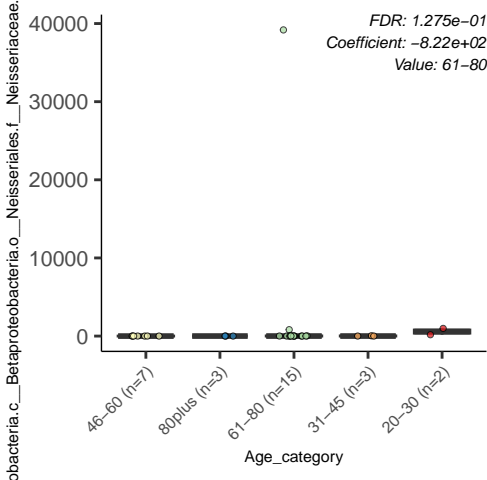



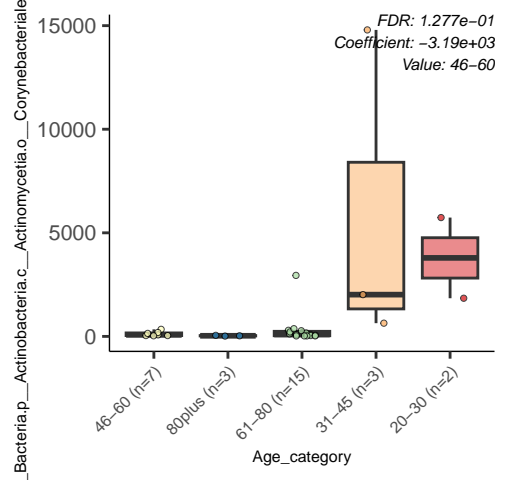

acteria.p\_\_Firmicutes.c\_\_Clostridia.o\_\_Eubacteriales.f\_\_Lachnospira

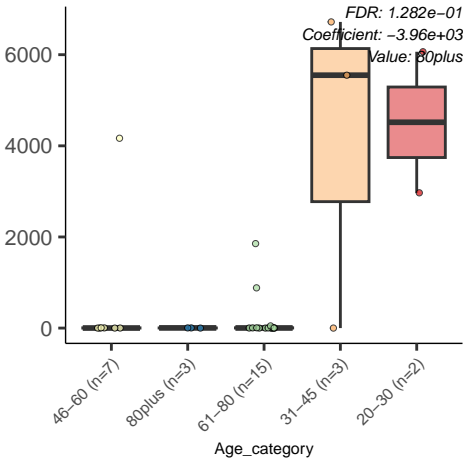

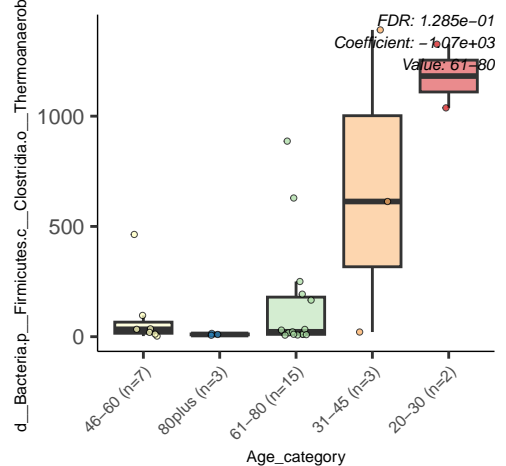

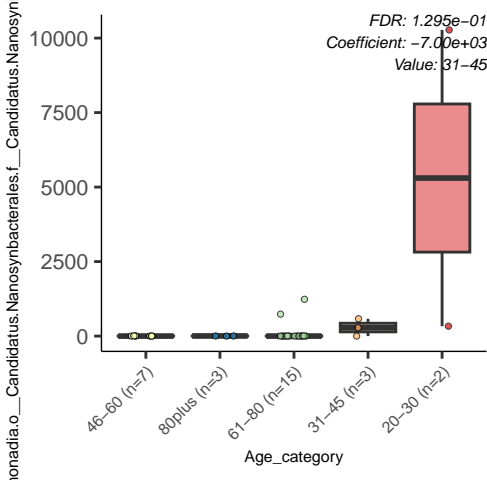

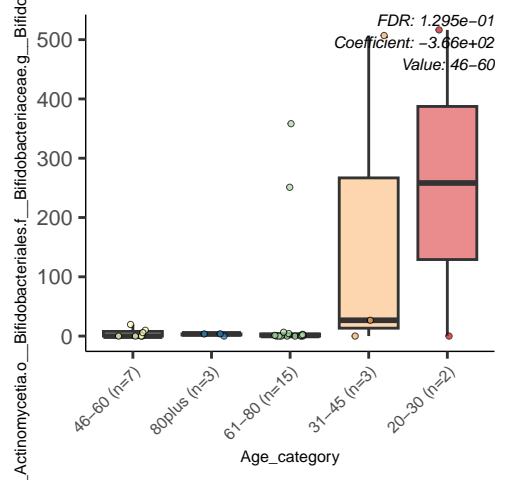

Clostridia.o\_\_Eubacteriales.f\_\_Oscillospiraceae.g\_\_Caproicibacte

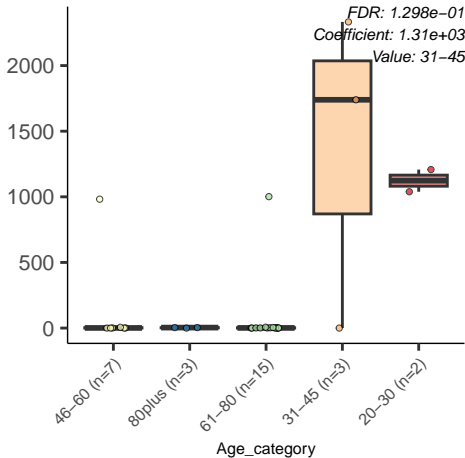

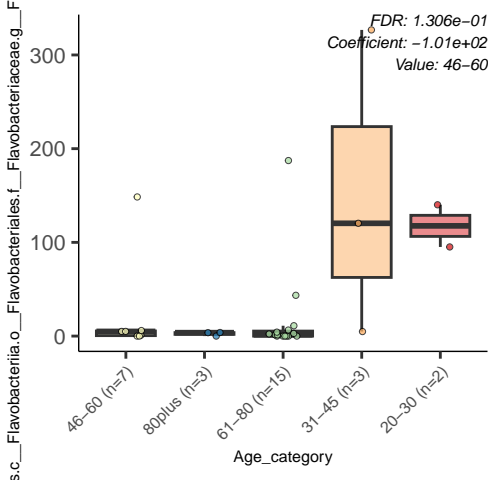

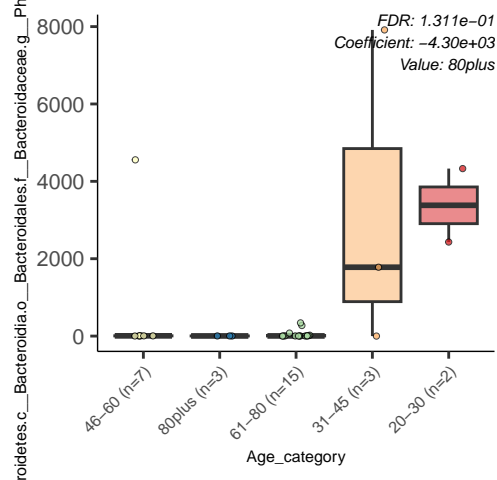



Proteobacteria.c\_\_Betaproteobacteria.o\_\_Burkholderiales.f\_\_Burkholderiales

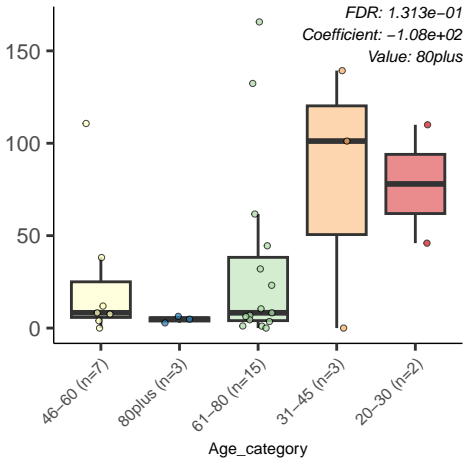

cteria.p\_\_Firmicutes.c\_\_Bacilli.o\_\_Lactobacillales.f\_\_Streptococcae

*FDR: 1.314e-01*  
*Coefficient: -1.82e+06*  
*Value: 46-60*

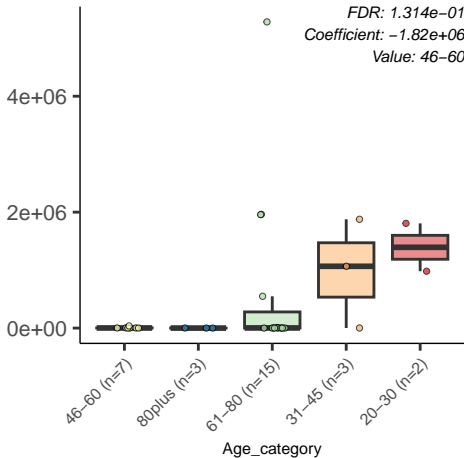

.c\_\_Actinomycetia.o\_\_Candidatus.Nanopelagicales.f\_\_Candidatus.

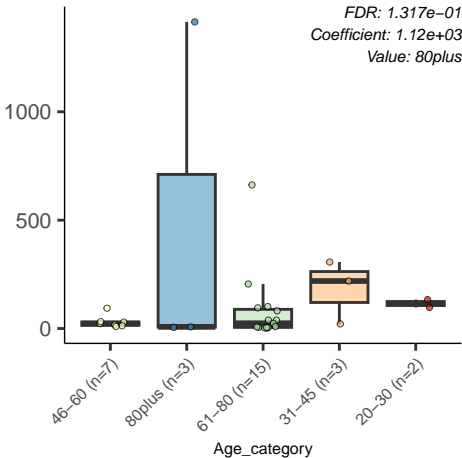

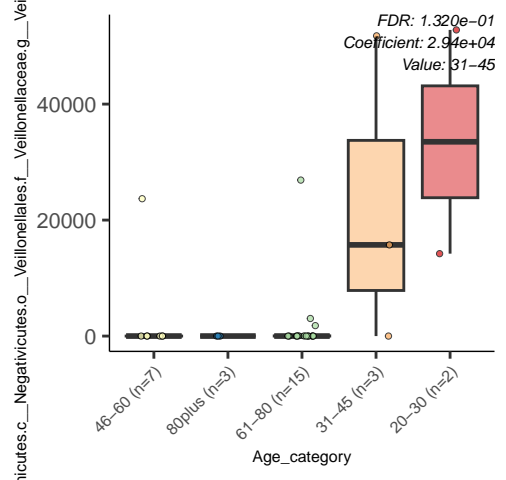

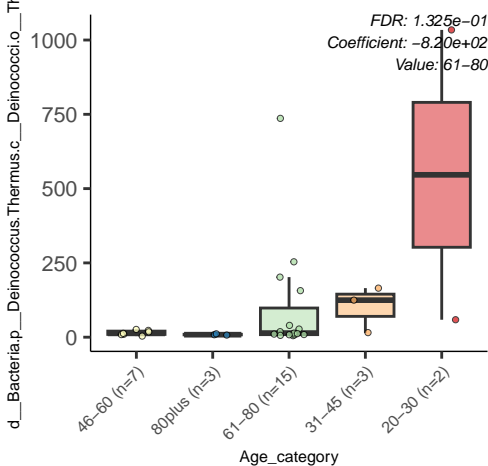

l\_Bacteria.p\_Deinococcus.Thermus.c\_Deinococci.o\_Thermales

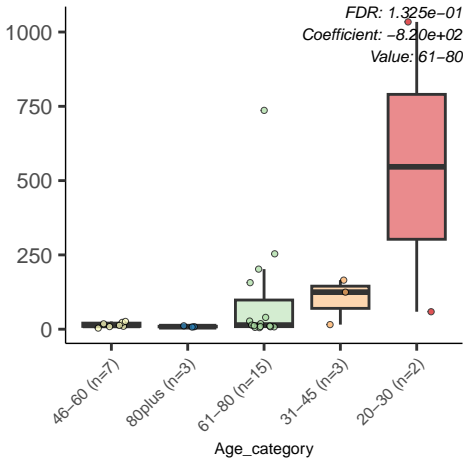

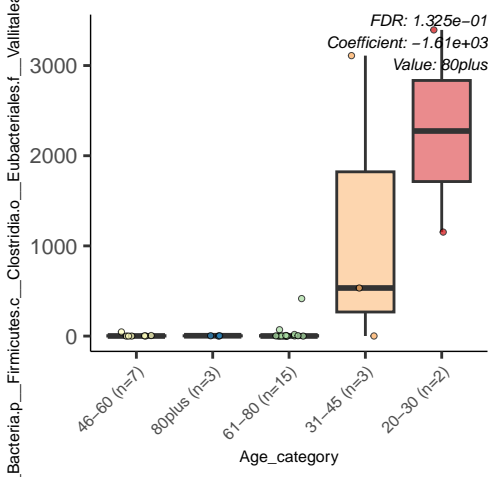

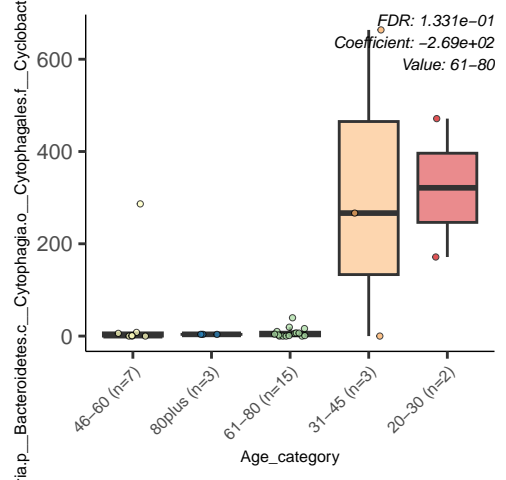



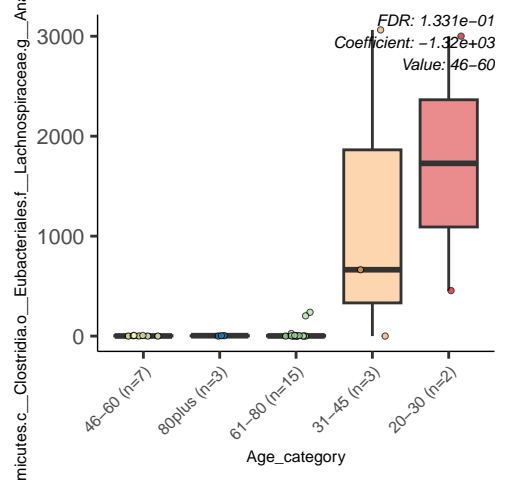

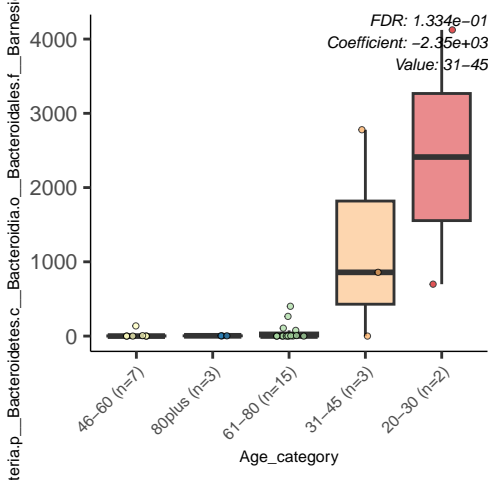

eroidetes.c\_\_Bacteroidia.o\_\_Bacteroidales.f\_\_Barnesiellaceae.g\_\_B

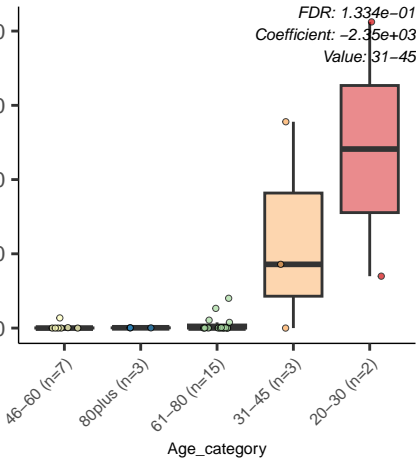

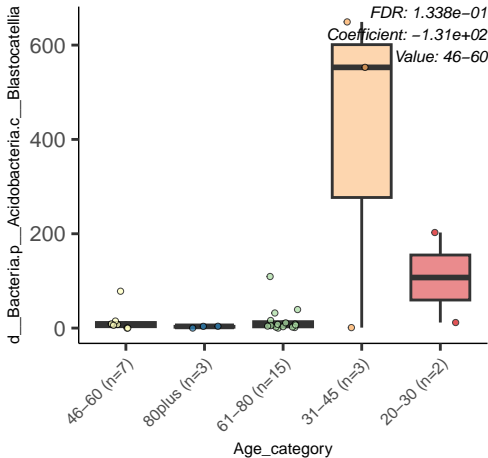

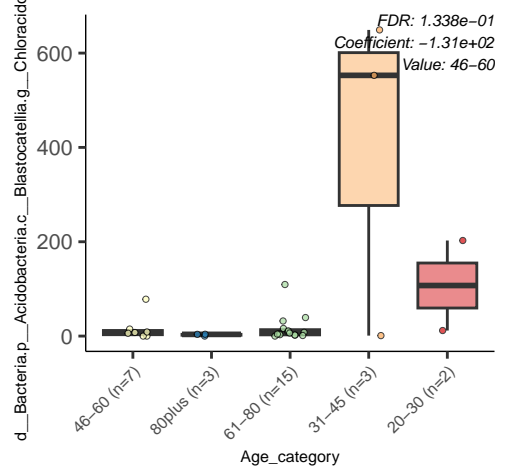

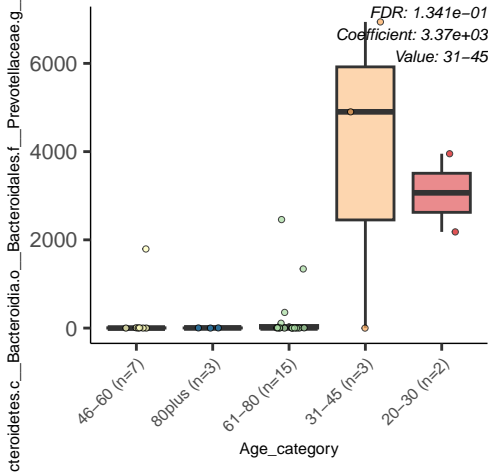

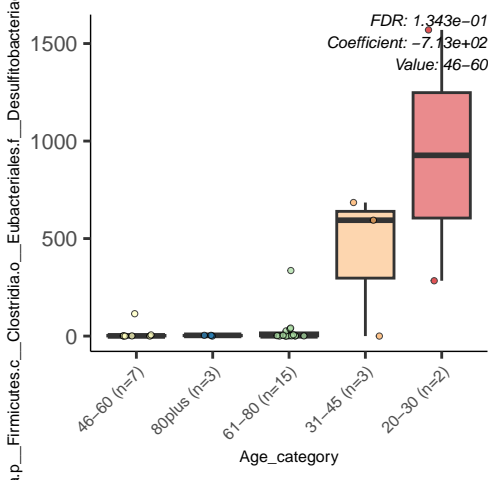

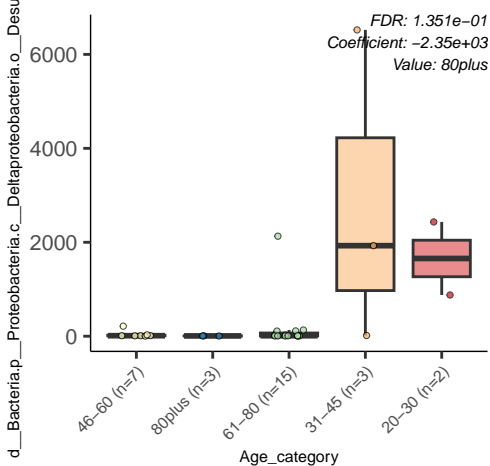



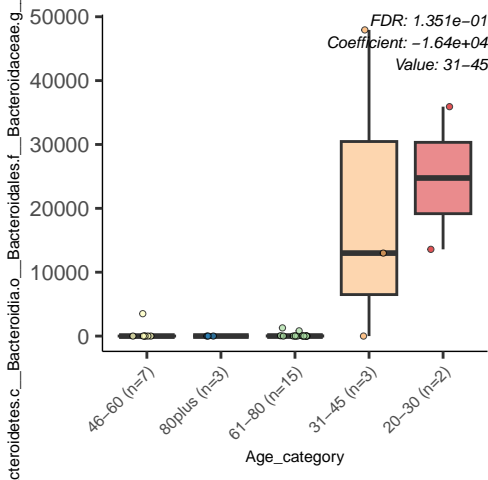

Firmicutes.c\_\_Erysipelotrichia.o\_\_Erysipelotrichales.f\_\_Erysipel

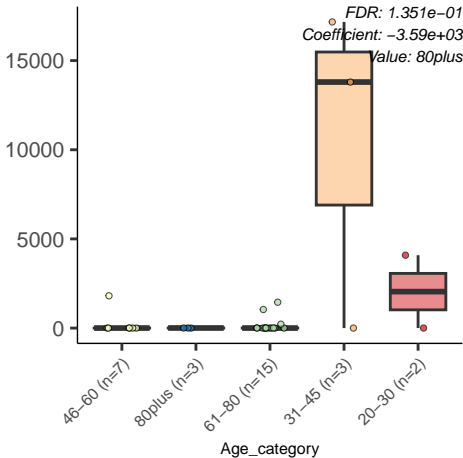

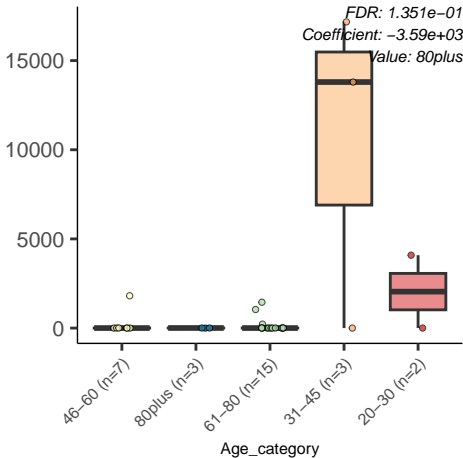

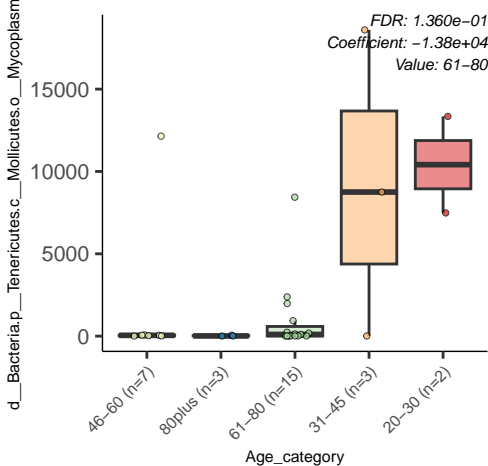

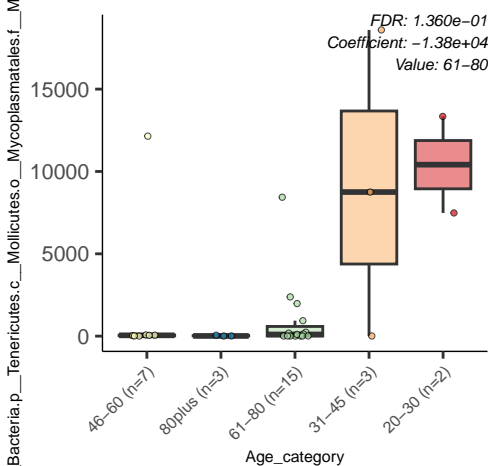

a.c\_\_Betaproteobacteria.o\_\_Burkholderiales.f\_\_Burkholderiaceae.g

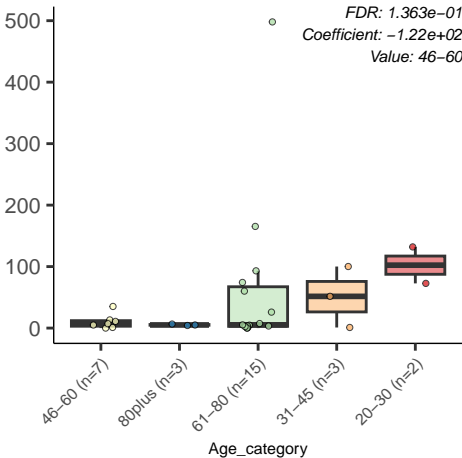

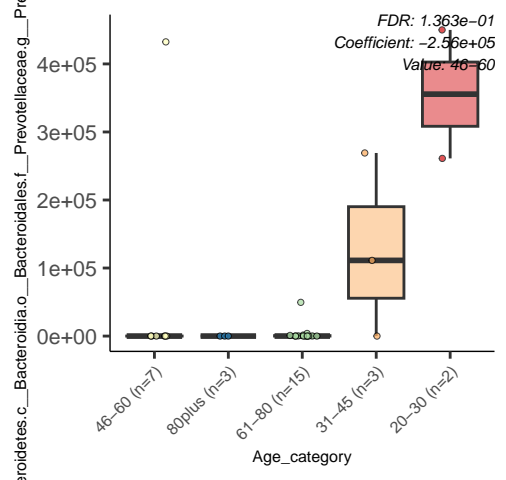

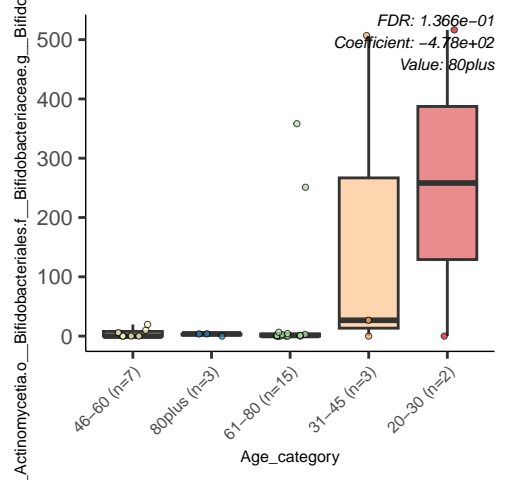



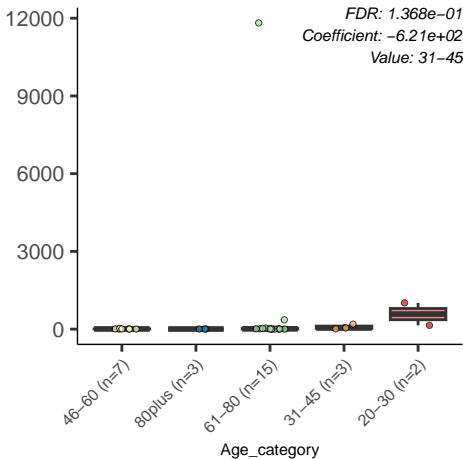

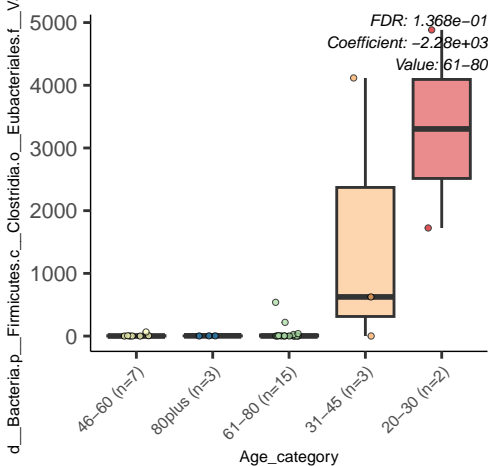

bacteria.p\_Firmicutes.c\_Clostridia.o\_Eubacteriales.f\_Lachnosp

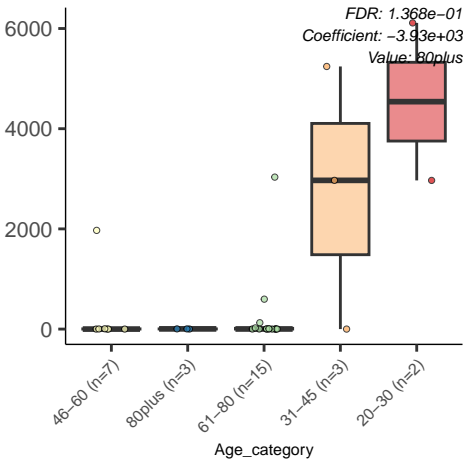

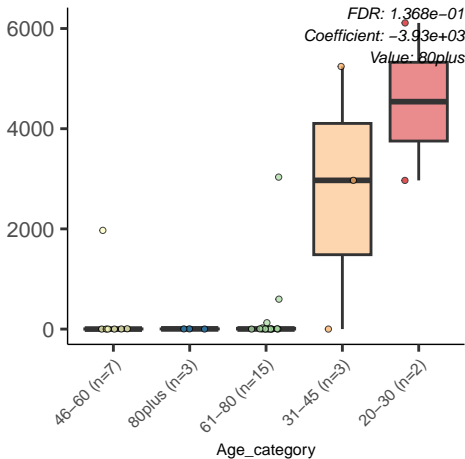

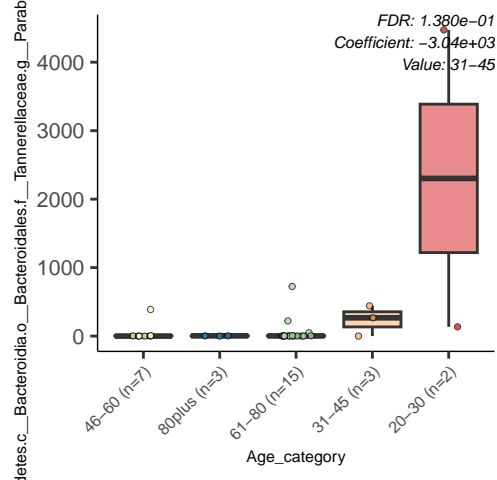

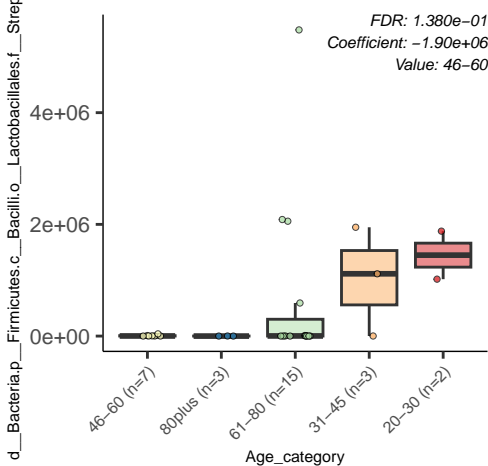

acteria.p\_\_Firmicutes.c\_\_Clostridia.o\_\_Eubacteriales.f\_\_Eubacteria

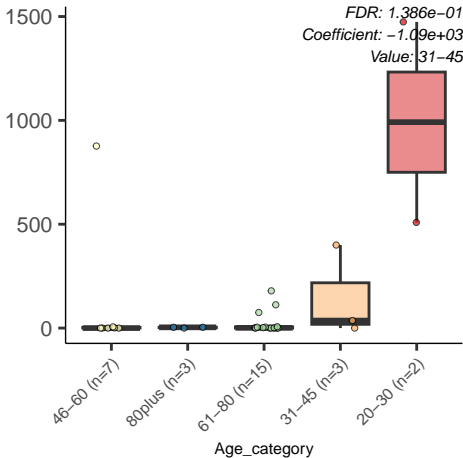

rmicutes.c\_\_Clostridia.o\_\_Eubacteriales.f\_\_Eubacteriaceae.g\_\_Alka

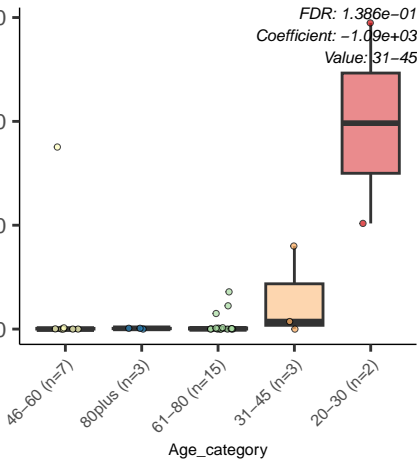



Actinomycetia.o\_Corynebacteriales.f\_Corynebacteriaceae.g

FDR: 1.389e-01  
Coefficient: 2.89e+03  
Value: 46-60

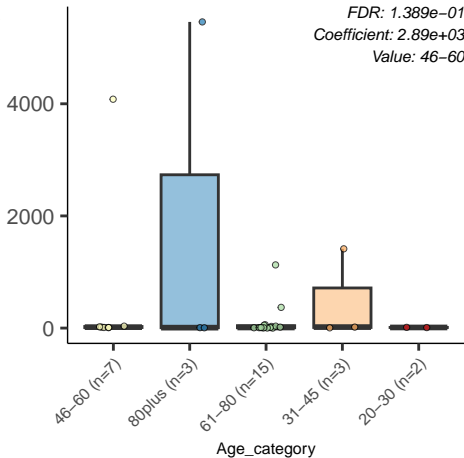

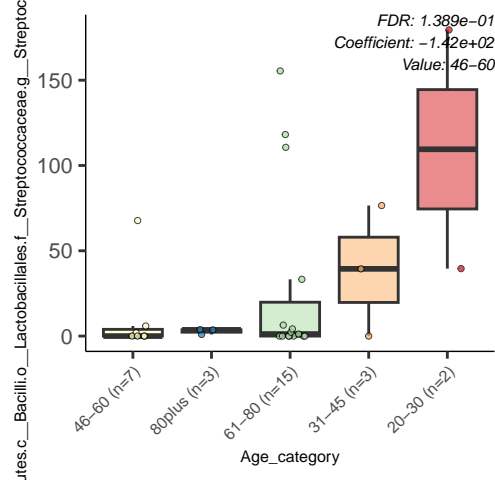

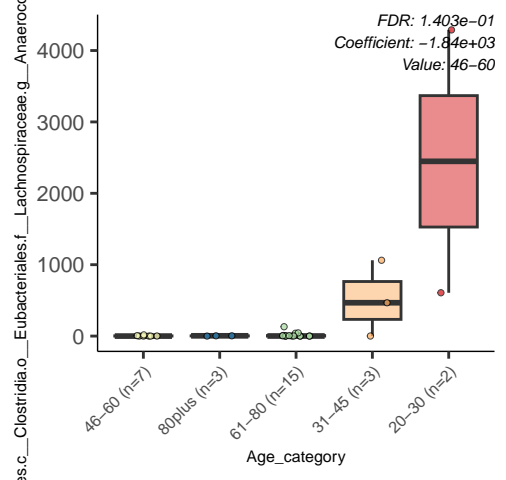

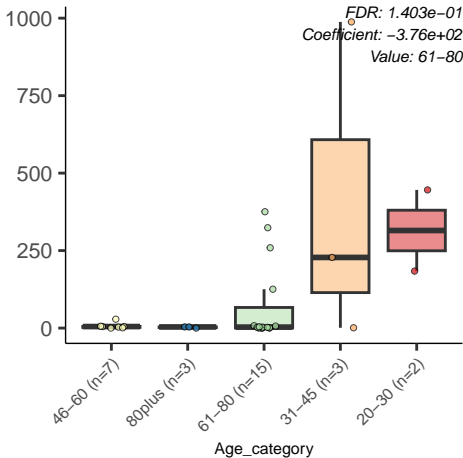

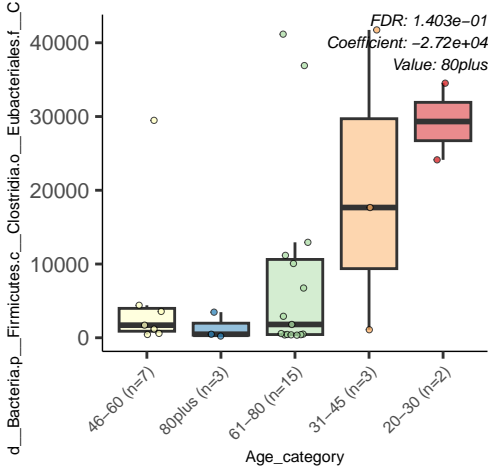

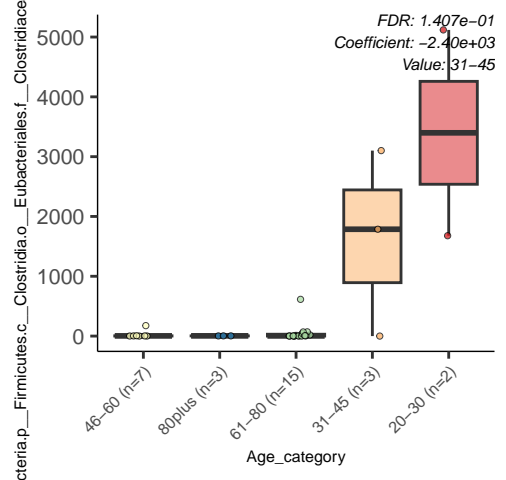

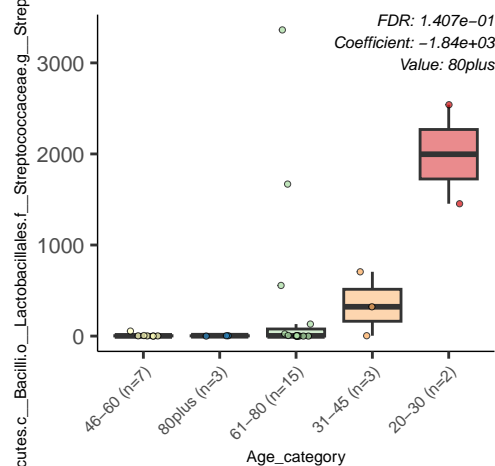

d\_Bacteria.p\_\_Spirochaetes

1e+05

5e+04

0e+00

FDR: 1.407e-01  
Coefficient: -2.52e+04  
Value: 61-80

46-60 (n=7)

80plus (n=3)

61-80 (n=15)

31-45 (n=3)

20-30 (n=2)

Age\_category

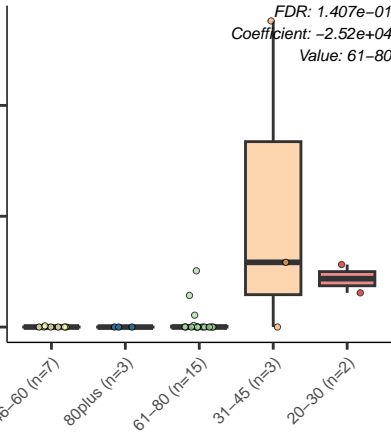



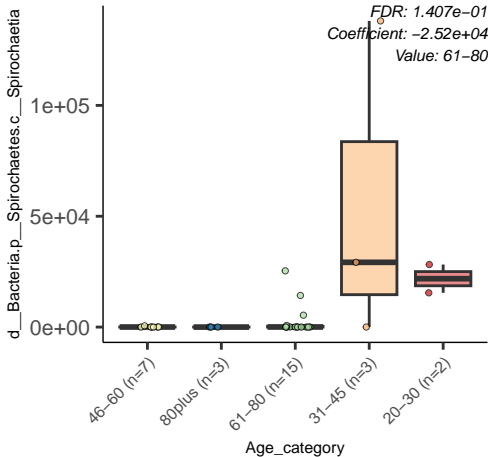

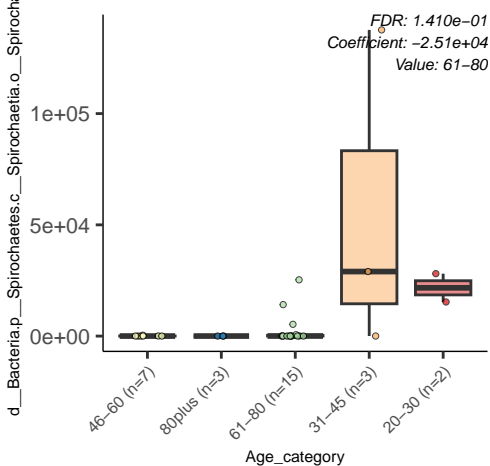

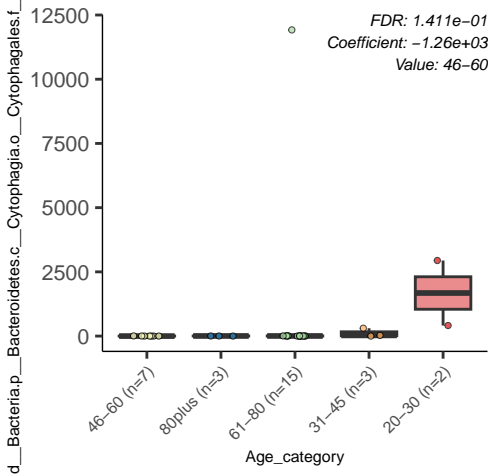

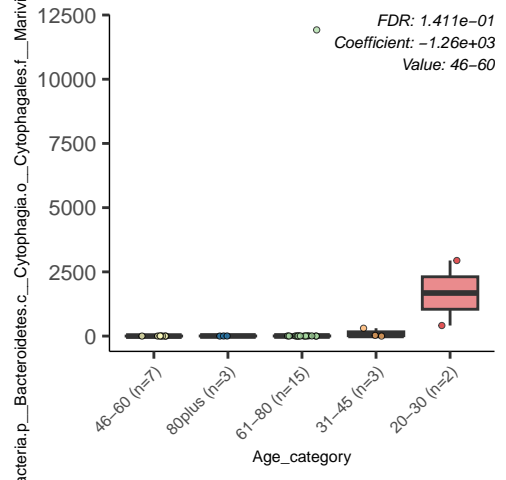

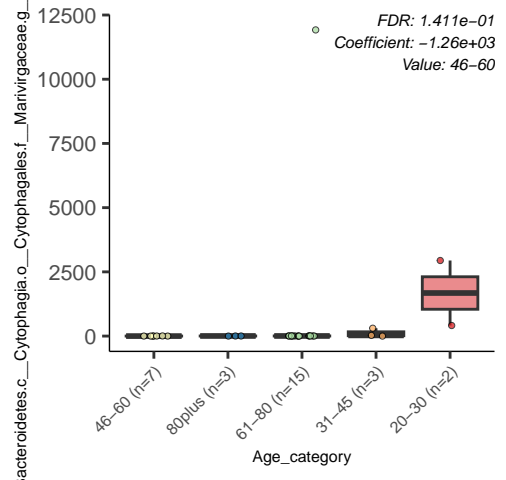

roidetes.c\_\_Bacteroidia.o\_\_Bacteroidales.f\_\_Bacteroidaceae.g\_\_Ba

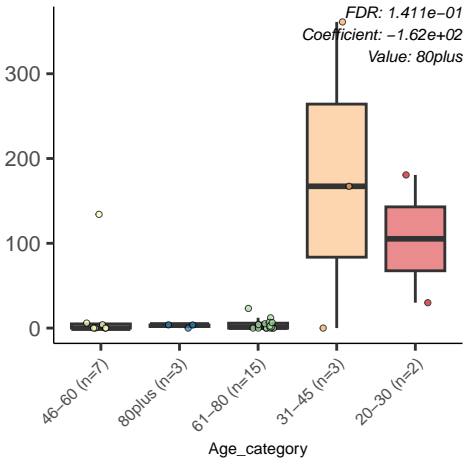

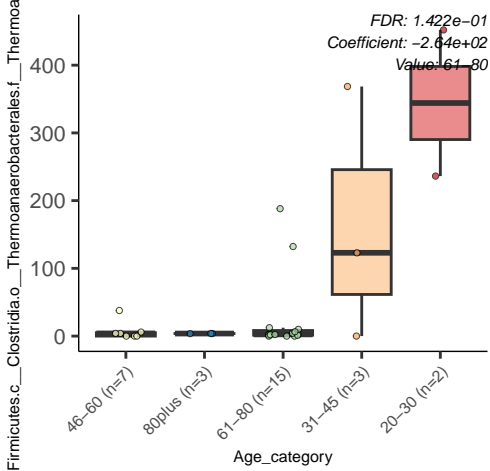

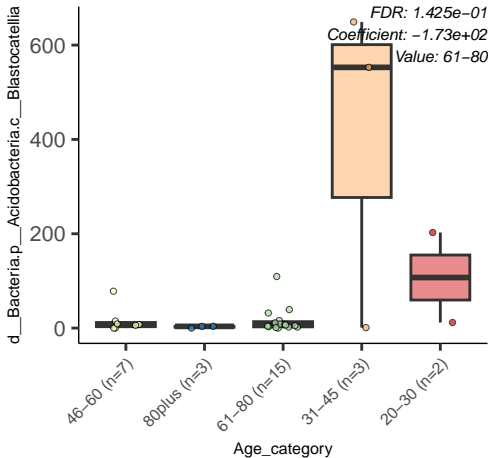



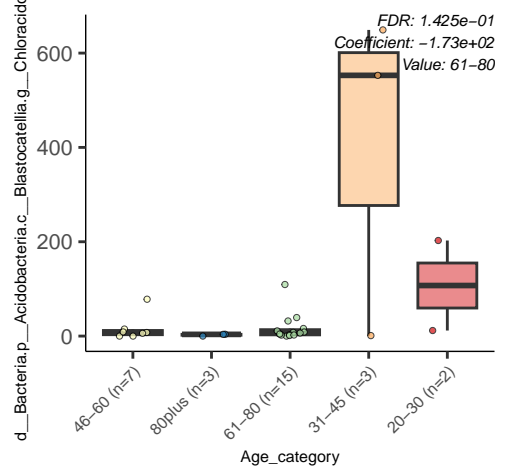

Proteobacteria.c\_\_Betaproteobacteria.o\_\_Burkholderiales.f\_\_Burkholderiales

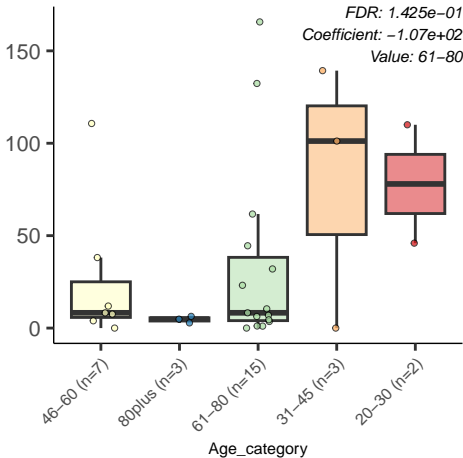

d\_\_Bacteria.p\_\_Tenericutes

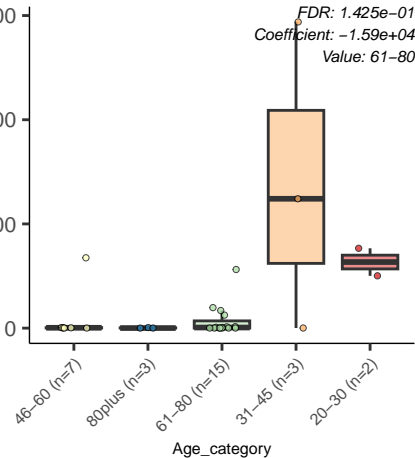

psilonproteobacteria.o\_\_Campylobacterales.f\_\_Campylobacteraceae

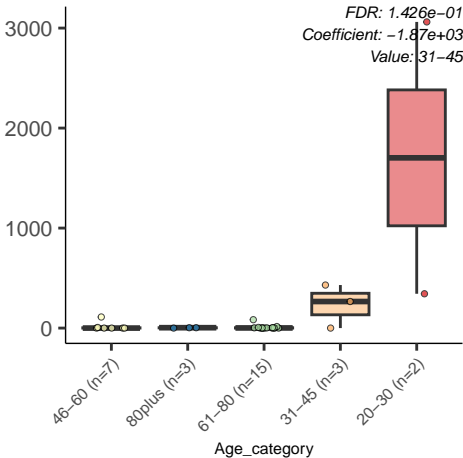

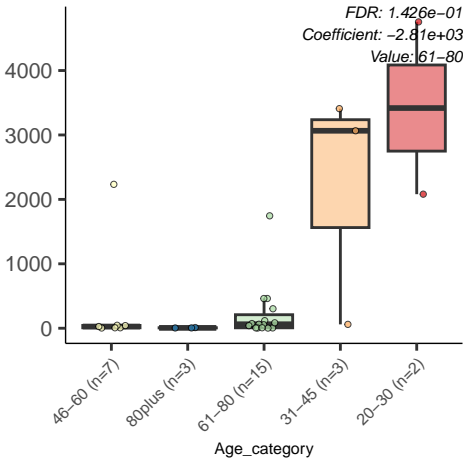

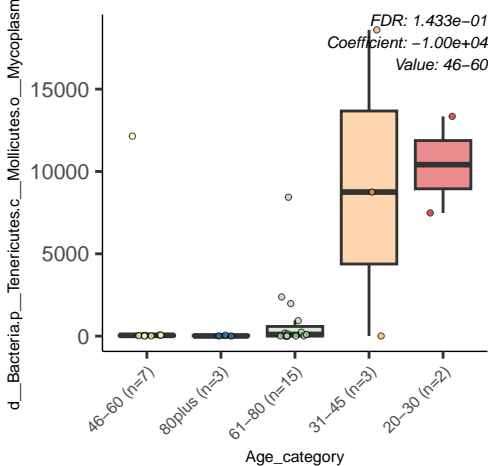

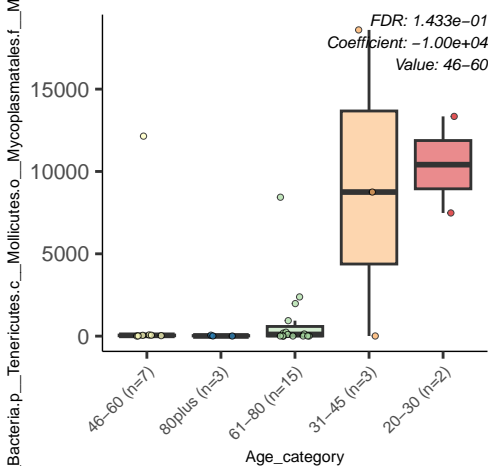

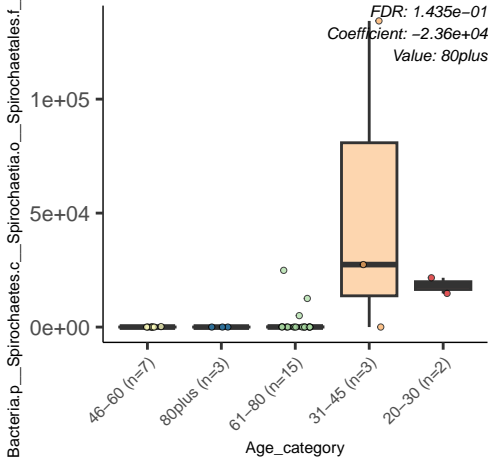



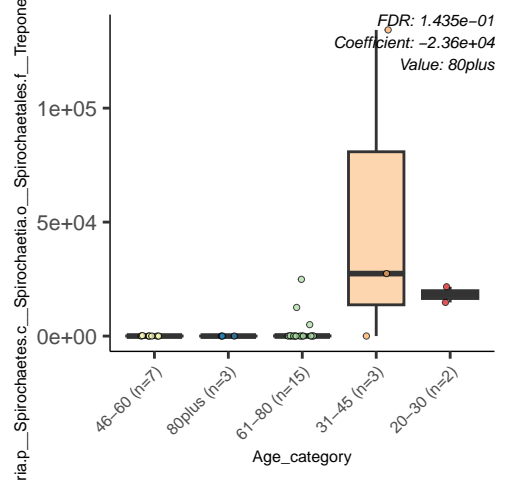

ilonproteobacteria.o\_\_Campylobacterales.f\_\_Campylobacteraceae.g

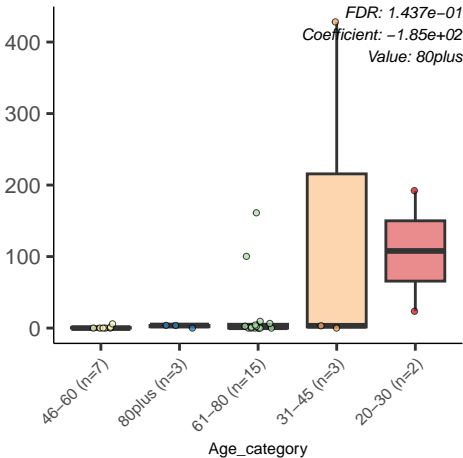

p\_Bacteroidetes.c\_Flavobacteriia.o\_Flavobacteriales.f\_Weeks

FDR: 1.437e-01  
Coefficient: -1.49e+02  
Value: 31-45

1000

500

0

46-60 (n=7)

80plus (n=3)

61-80 (n=15)

31-45 (n=3)

20-30 (n=2)

Age\_category

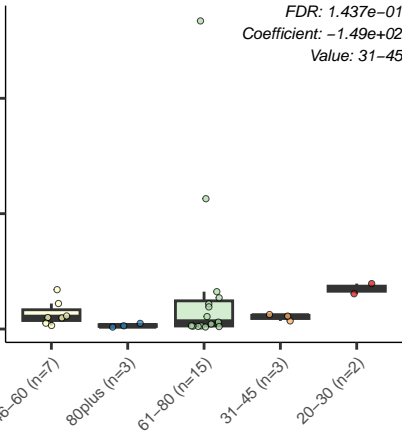

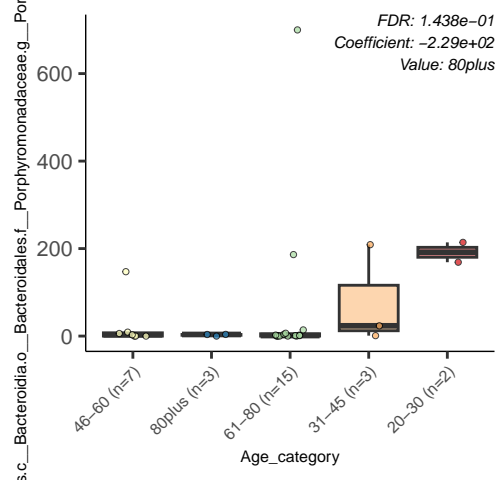

a.p\_\_Actinobacteria.c\_\_Actinomycetia.o\_\_Micrococcales.f\_\_Microc

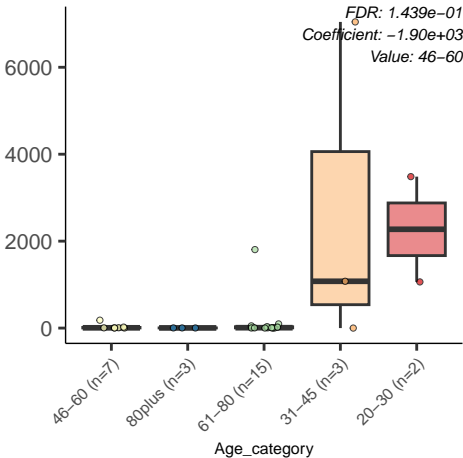

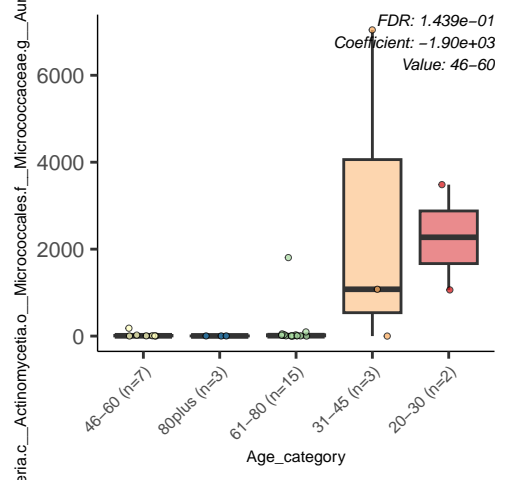

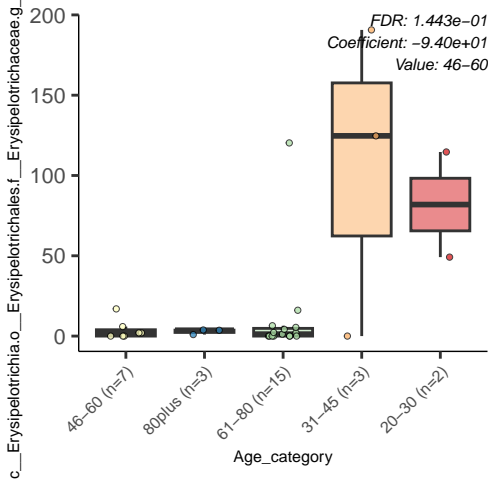

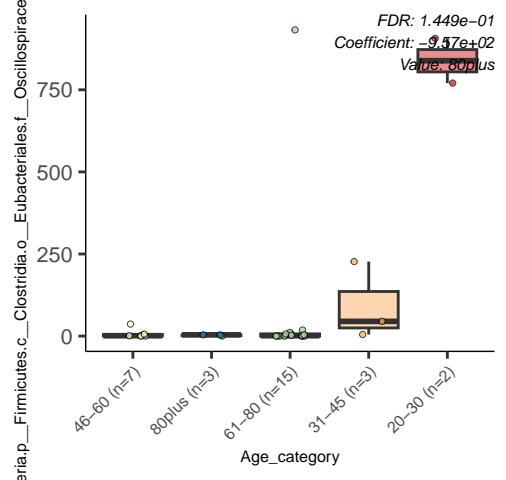



Actinomycetia.o\_\_Corynebacteriales.f\_\_Corynebacteriaceae.g

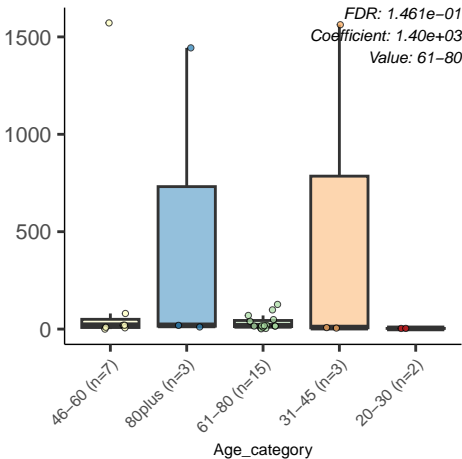

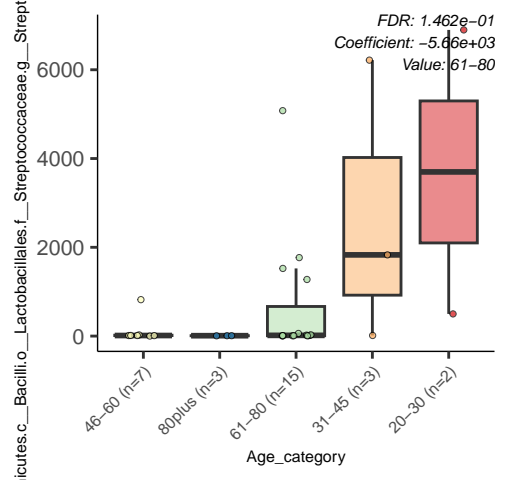

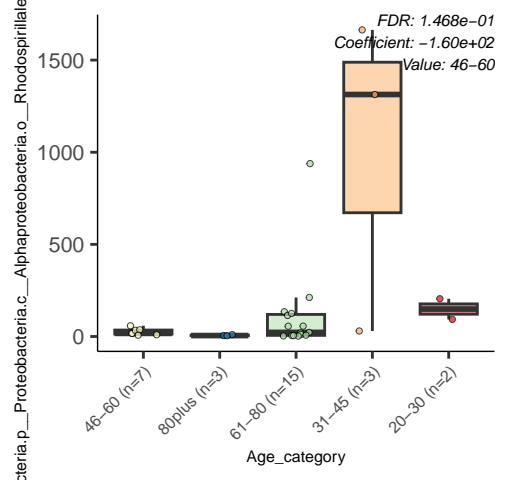

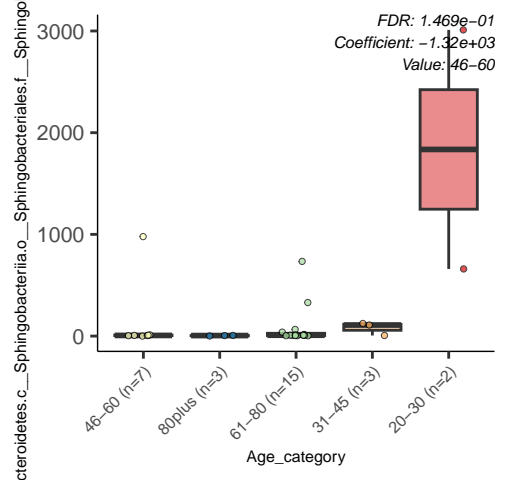

tes.c\_\_Bacilli.o\_\_Lactobacillales.f\_\_Streptococcaceae.g\_\_Streptococcus

200

100

0

46-60 (n=7)

80plus (n=3)

61-80 (n=15)

31-45 (n=3)

20-30 (n=2)

Age\_category

FDR: 1.470e-01  
Coefficient: -1.66e+02  
Value: 80plus

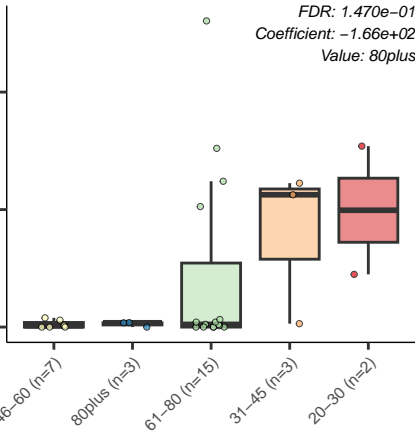

Firmicutes.c\_\_Erysipelotrichia.o\_\_Erysipelotrichales.f\_\_Erysipel

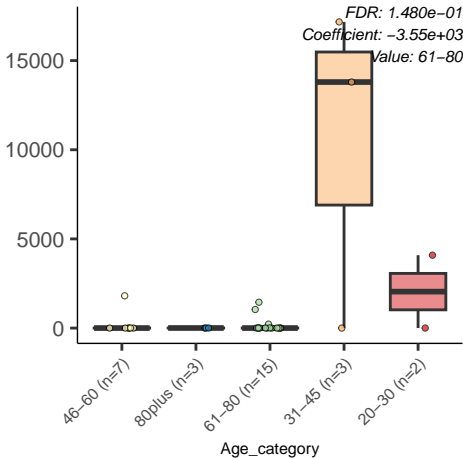

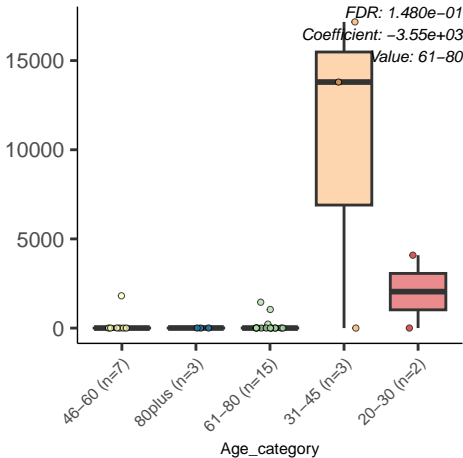

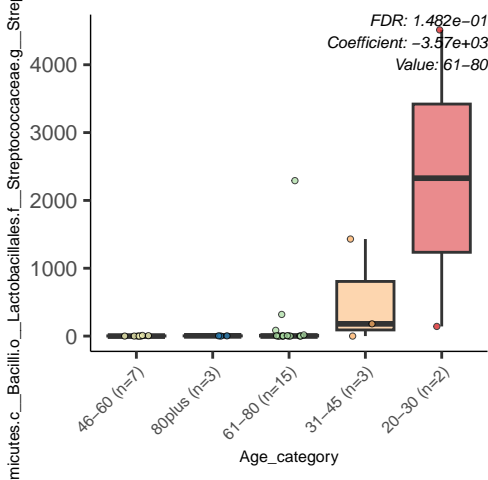



Clostridia.o\_\_Eubacteriales.f\_\_Oscillospiraceae.g\_\_Caproicibacte

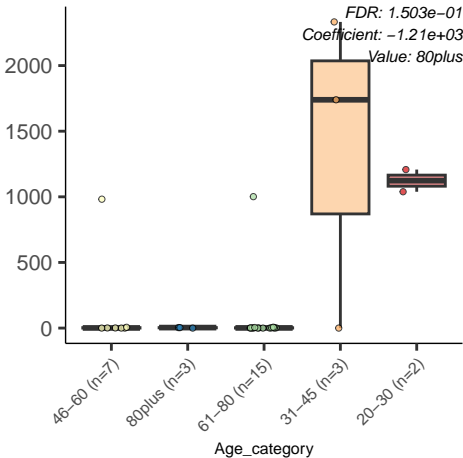

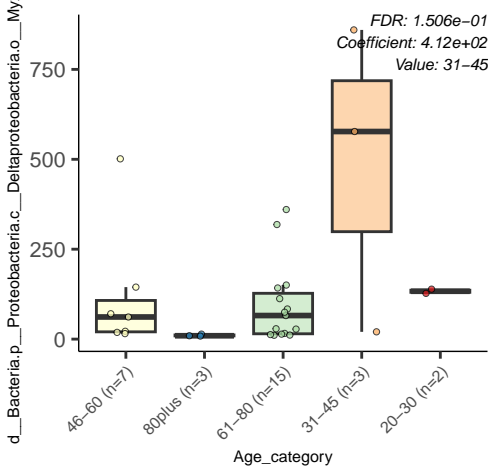

eroidetes.c\_\_Bacteroidia.o\_\_Bacteroidales.f\_\_Prevotellaceae.g\_\_Pr

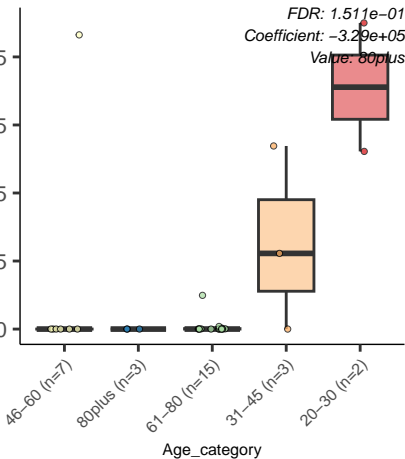

d\_Bacteria.p\_Actinobacteria.c\_Actinomycetia.o\_Candidatus.N

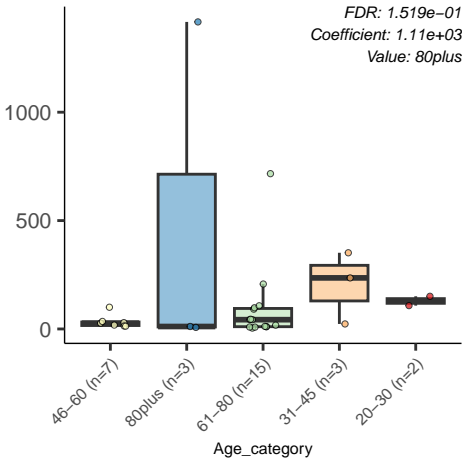

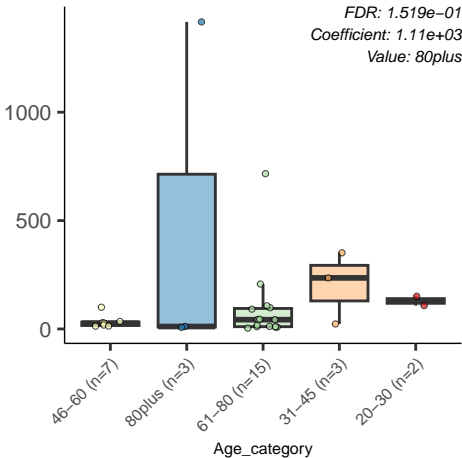

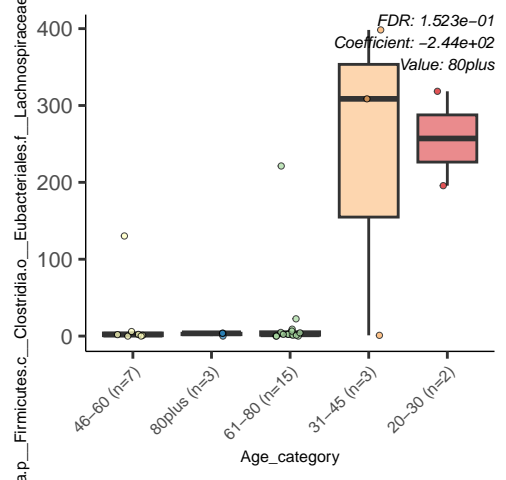

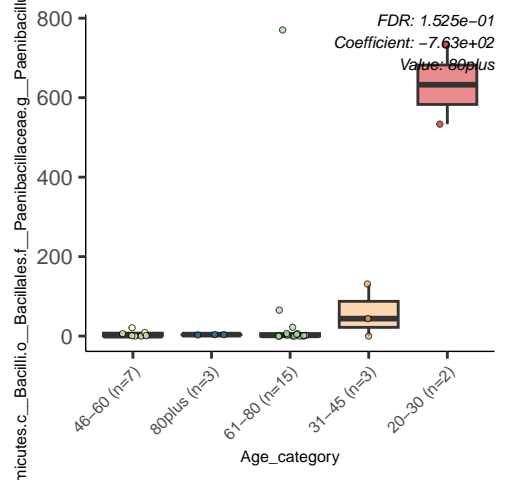

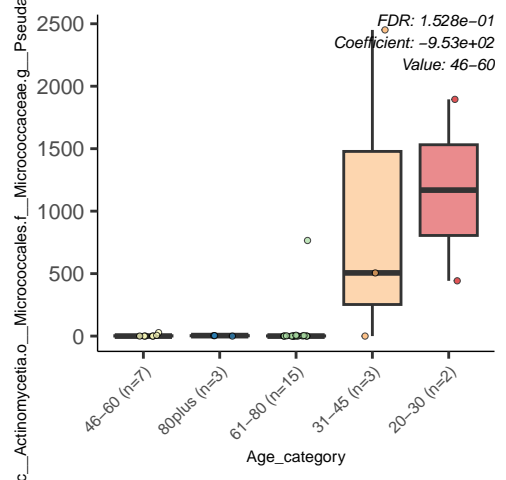



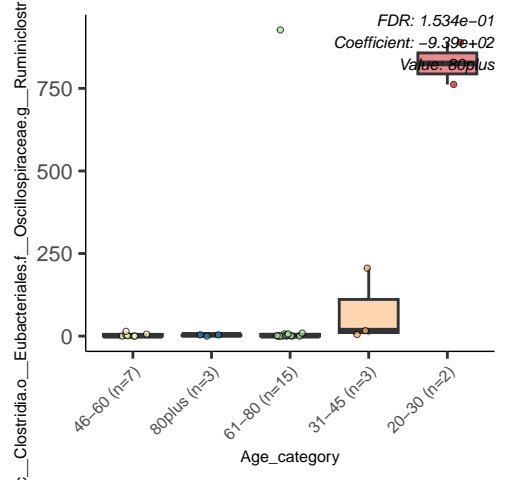

d\_Bacteria.p\_Thermotogae

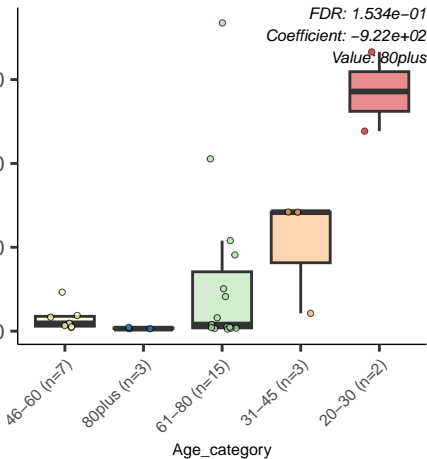

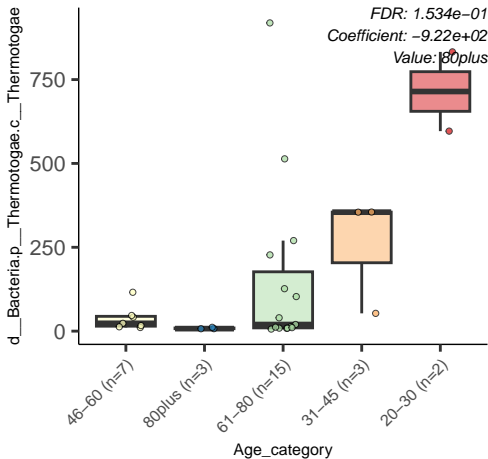

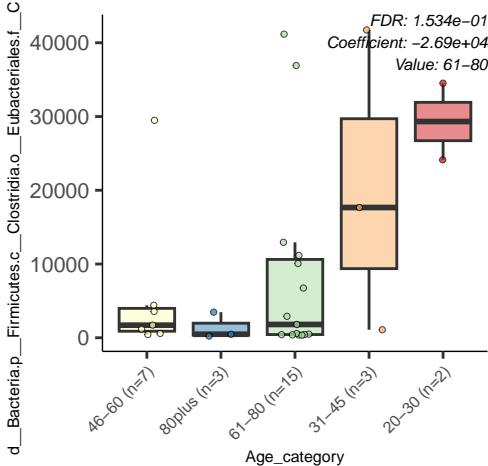

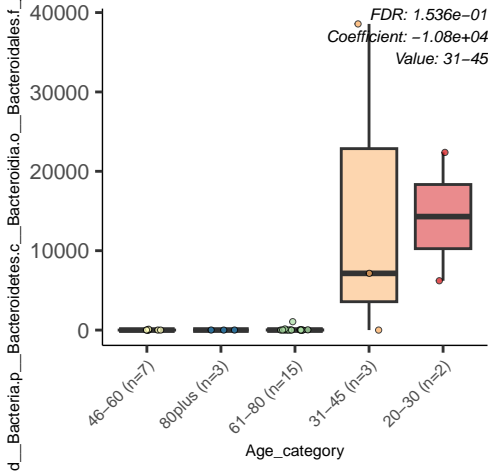

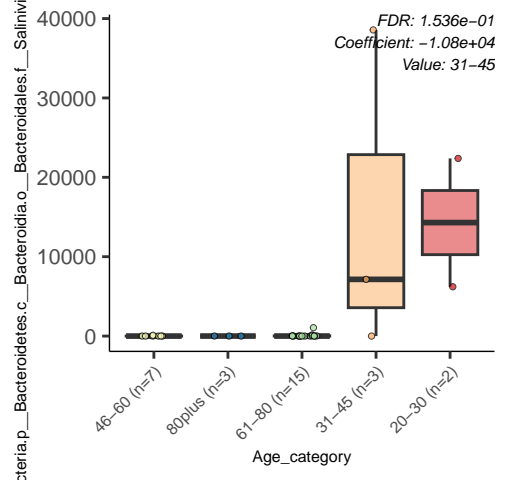

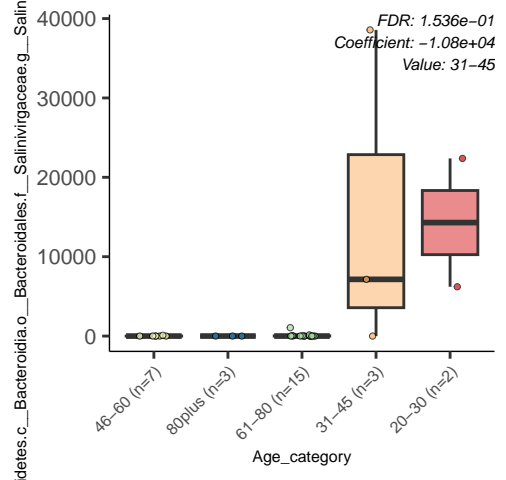

acteria.c\_Actinomycetia.o\_Actinomycetales.f\_Actinomycetaceae.

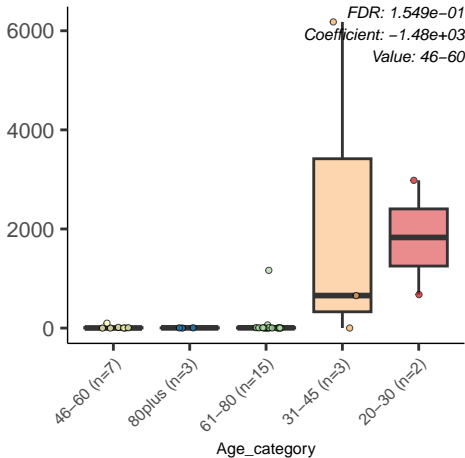



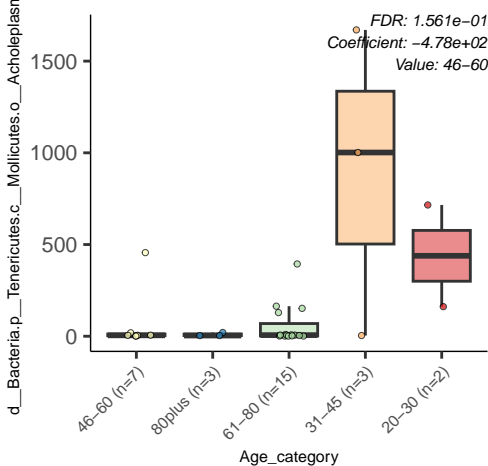

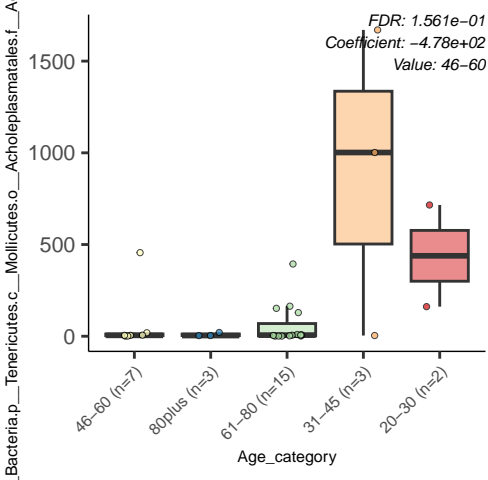

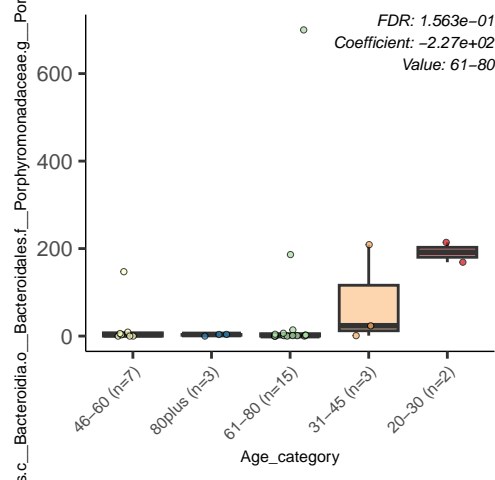

bacteria.p\_\_Firmicutes.c\_\_Clostridia.o\_\_Eubacteriales.f\_\_Lachnospir

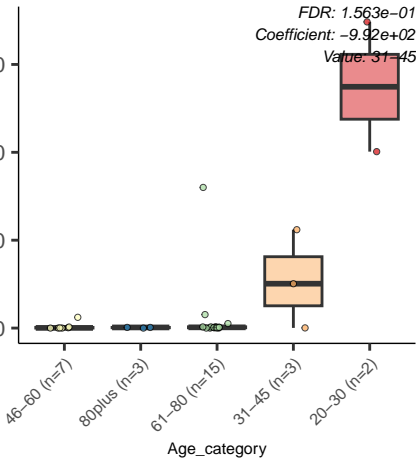

micutes.c\_\_Clostridia.o\_\_Eubacteriales.f\_\_Lachnospiraceae.g\_\_Se

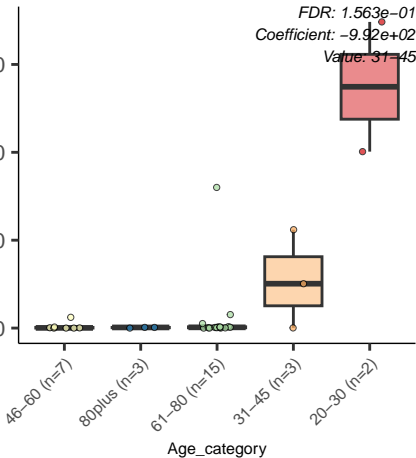

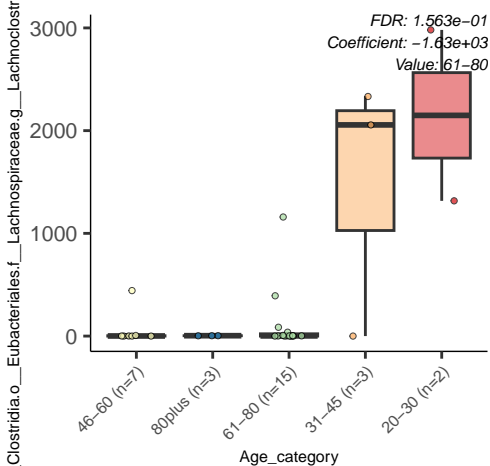

acteria.p\_Firmicutes.c\_Clostridia.o\_Eubacteriales.f\_Oscillospirac

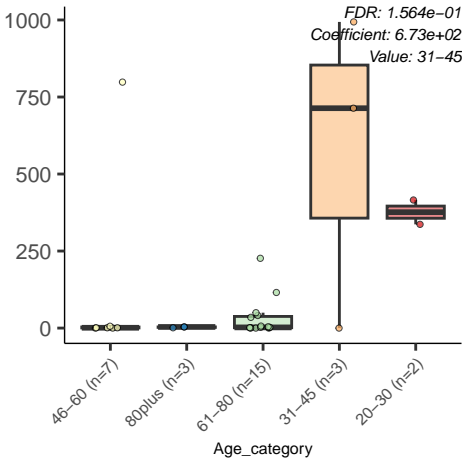

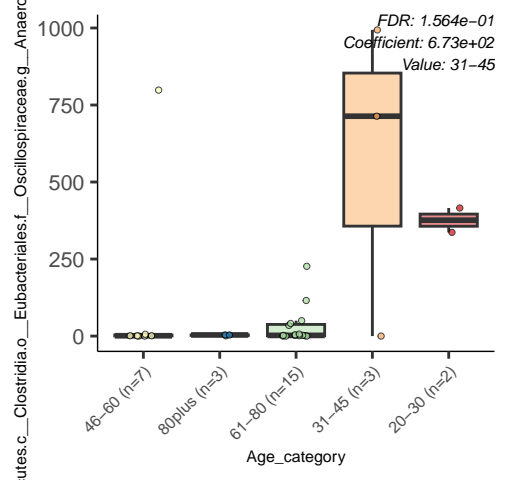



\_Bacteria.p\_\_Firmicutes.c\_\_Clostridia.o\_\_Eubacteriales.f\_\_Vallitale

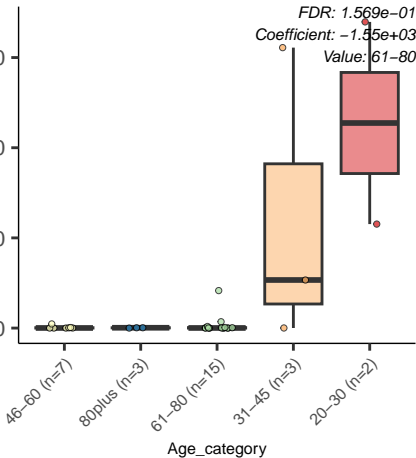

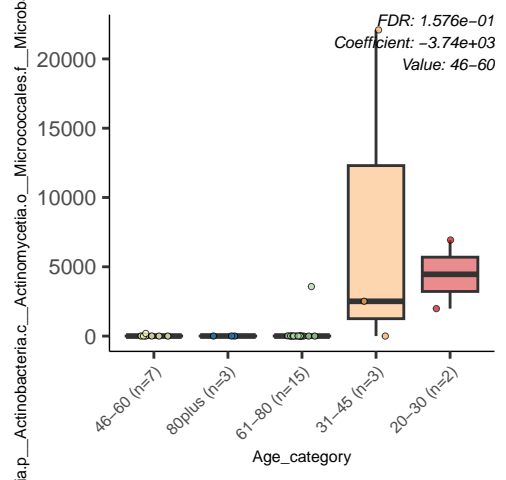

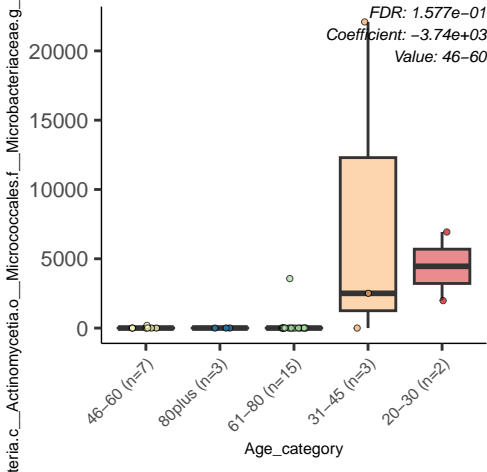

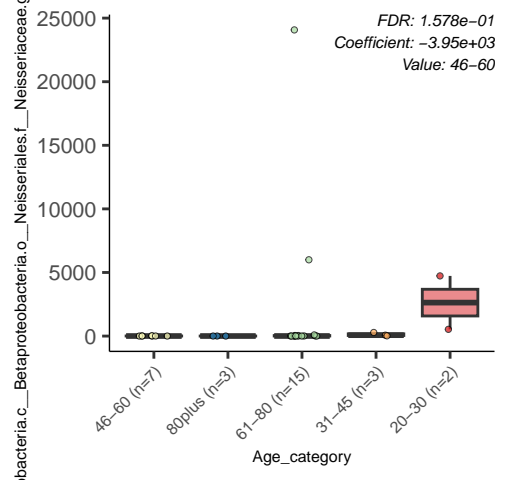

d\_\_Bacteria.p\_\_Tenericutes.c\_\_Mollicutes.o\_\_Acholeplasma

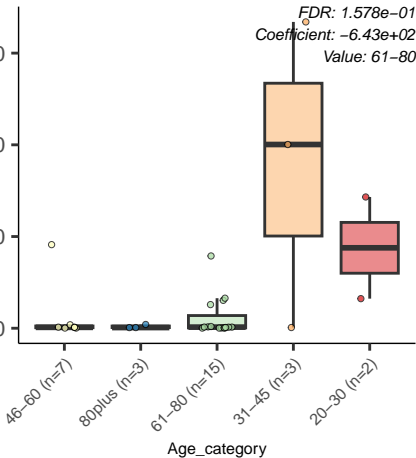

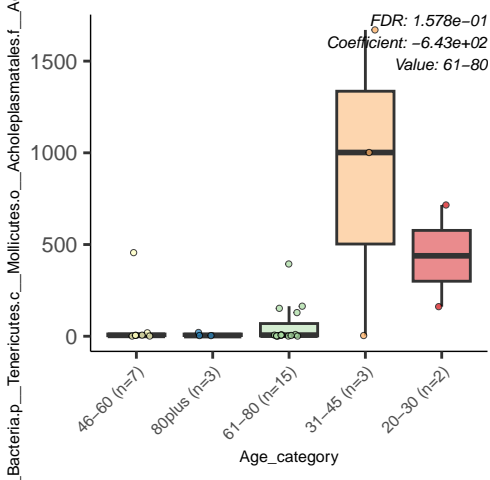

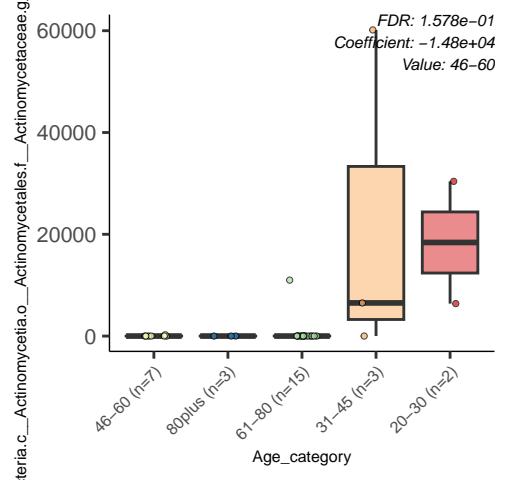

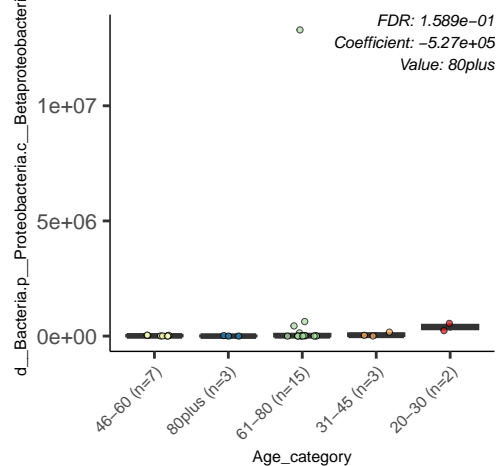



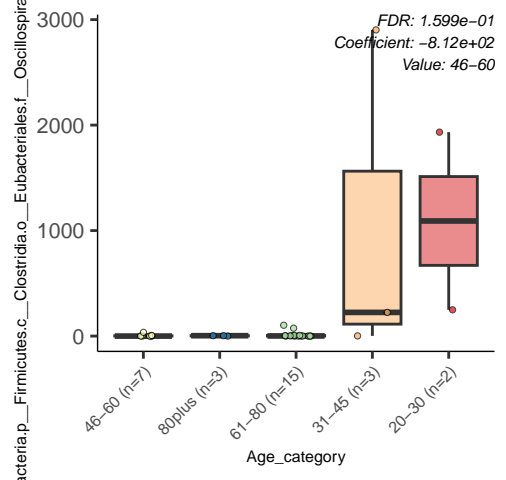

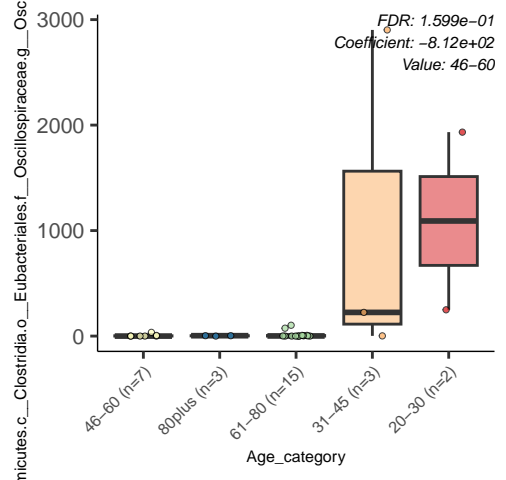

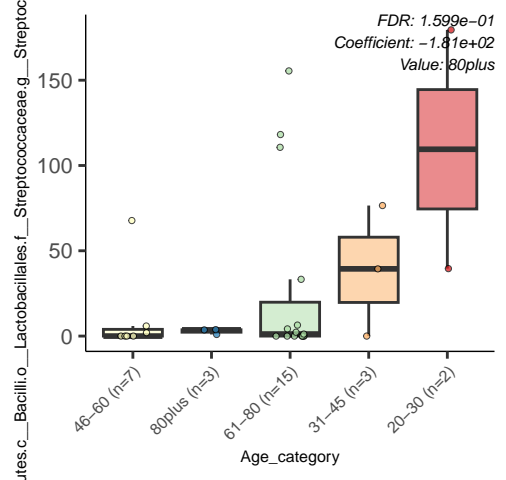

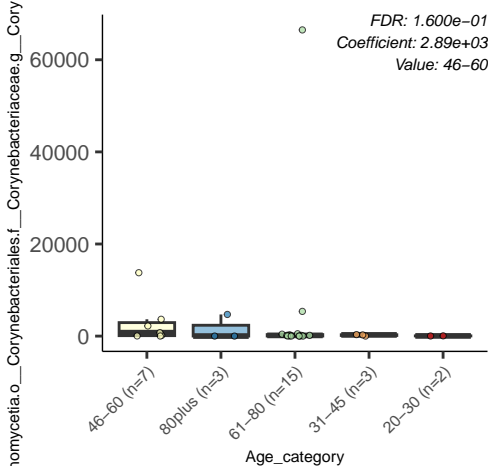

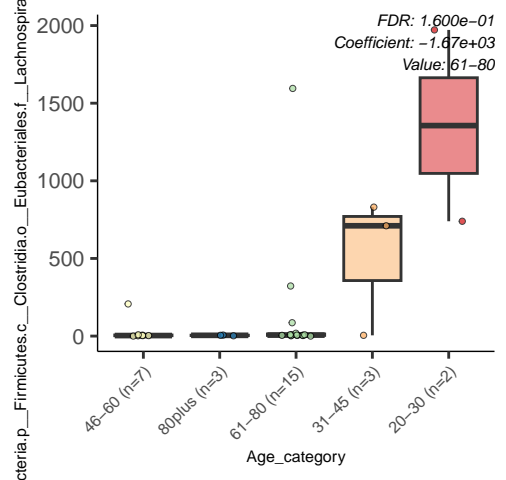

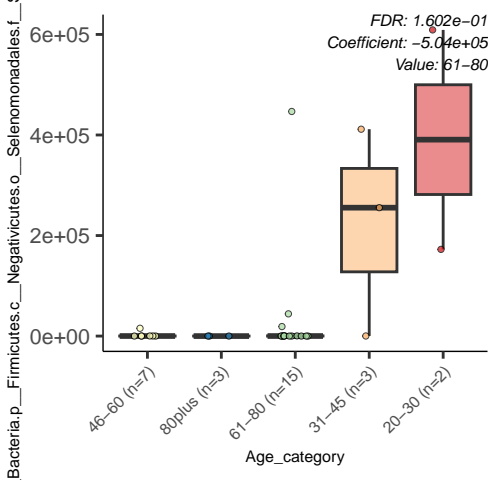

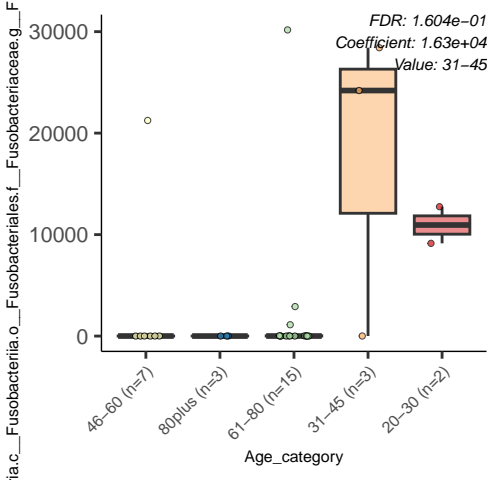

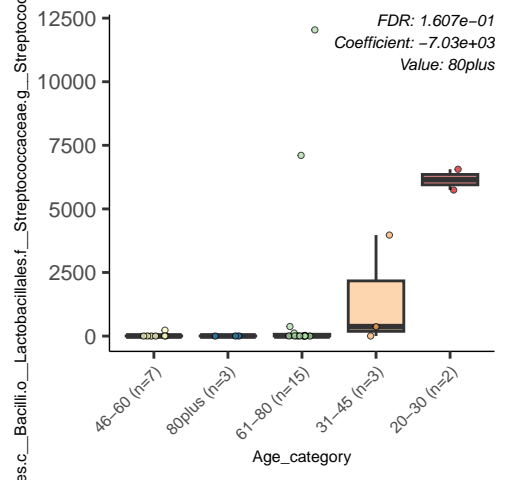



bacteria.p\_Actinobacteria.c\_Actinomycetia.o\_Corynebacteriales.f\_

FDR: 1.608e-01  
Coefficient: 1.22e+05  
Value: 46-60

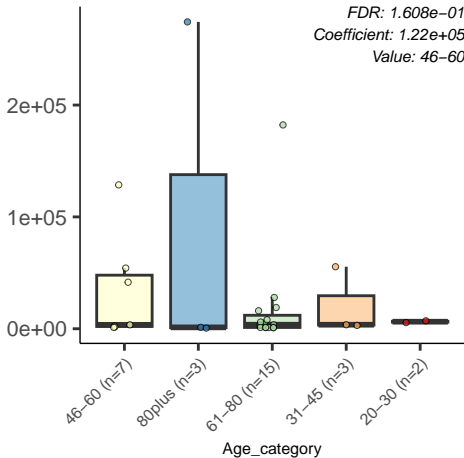

Actinobacteria.c\_\_Actinomycetia.o\_\_Corynebacteriales.f\_\_Coryneb

FDR: 1.608e-01  
Coefficient: 1.22e+05  
Value: 46-60

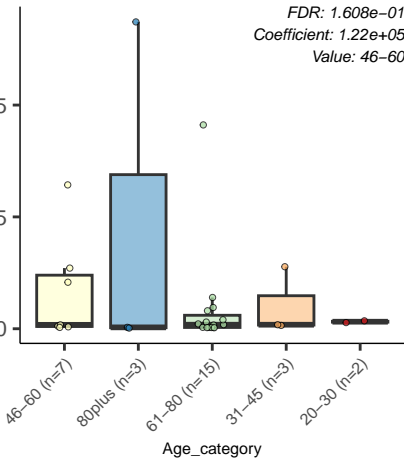

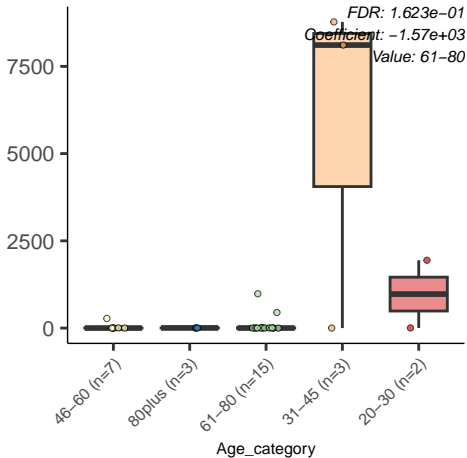

FDR: 1.623e-01  
Coefficient: 9.81e+01  
Value: 80plus

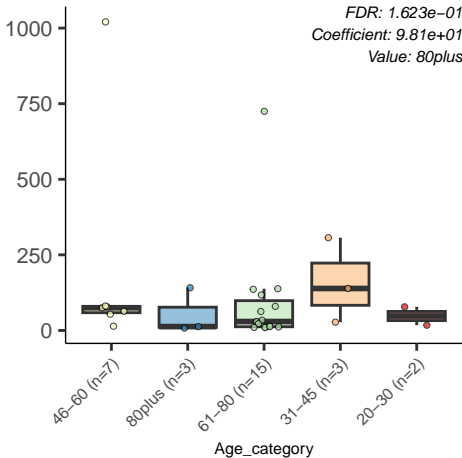

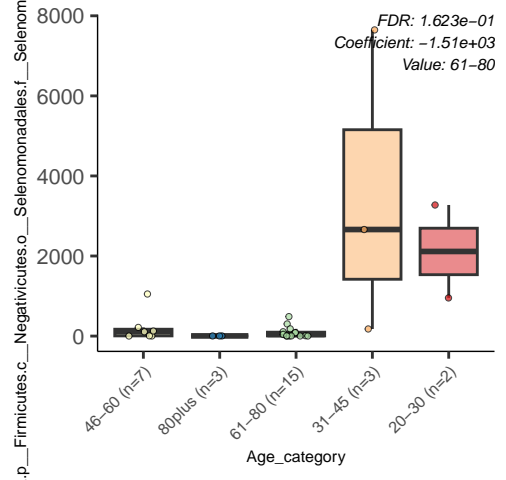

ites.c\_\_Clostridia.o\_\_Eubacteriales.f\_\_Lachnospiraceae.g\_\_Mediter

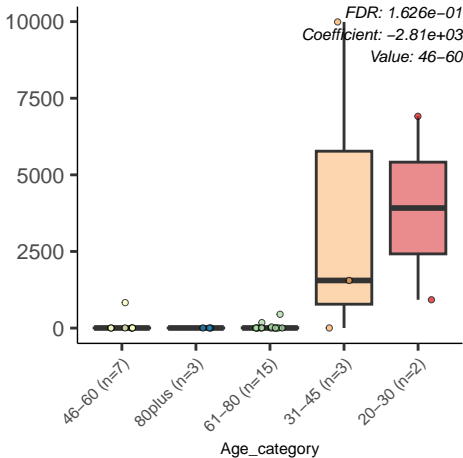

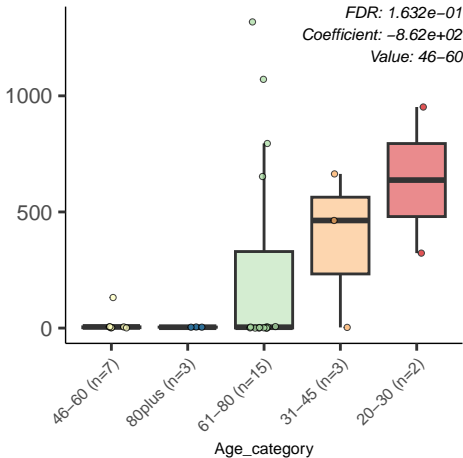

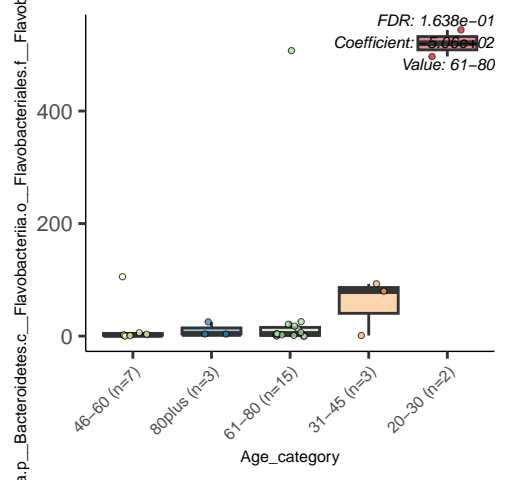



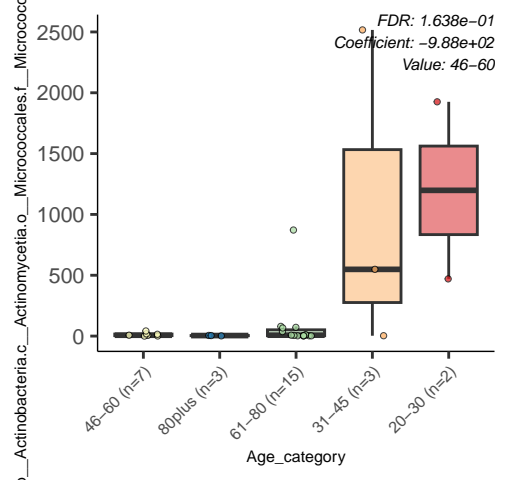

cteria.p\_\_Proteobacteria.c\_\_Alphaproteobacteria.o\_\_Rhodospirillales

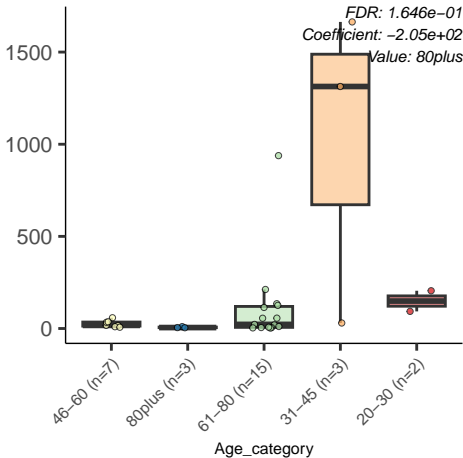

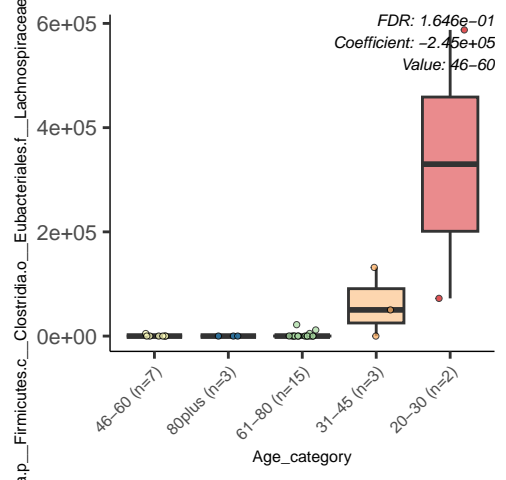

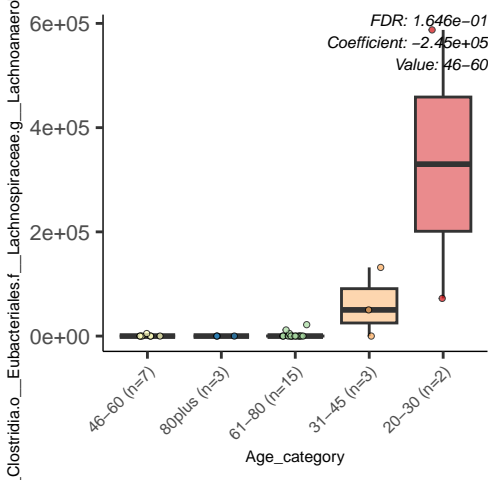

d\_\_Bacteria.p\_\_Firmicutes.c\_\_Clostridia.o\_\_Eubacteriales.f\_\_Pro

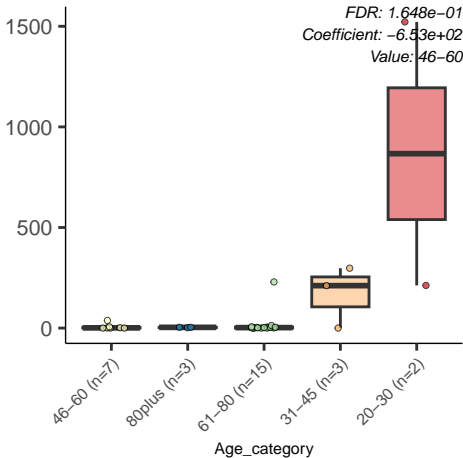

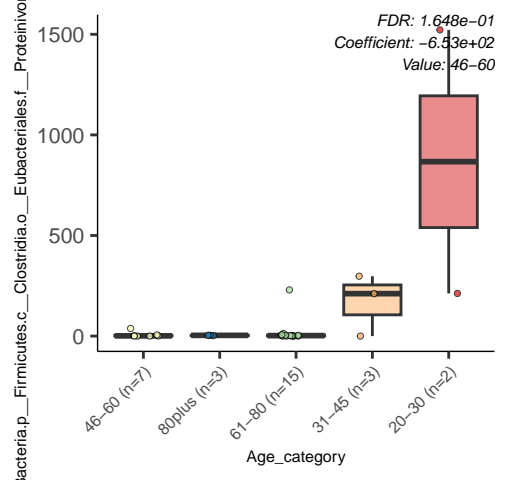

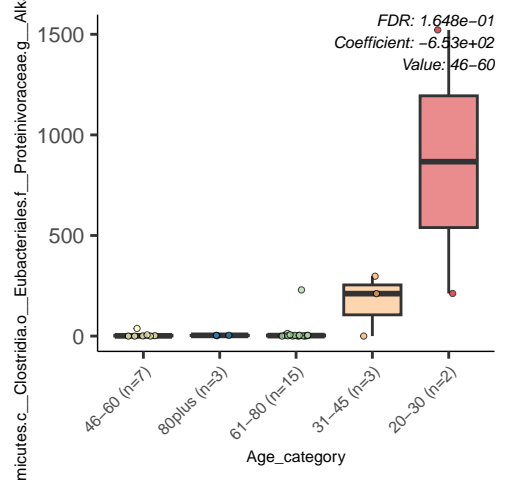

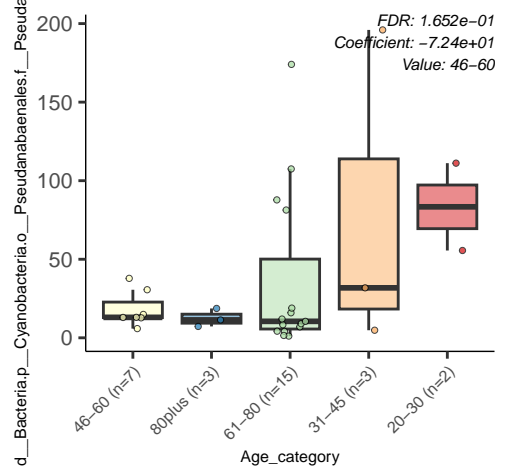



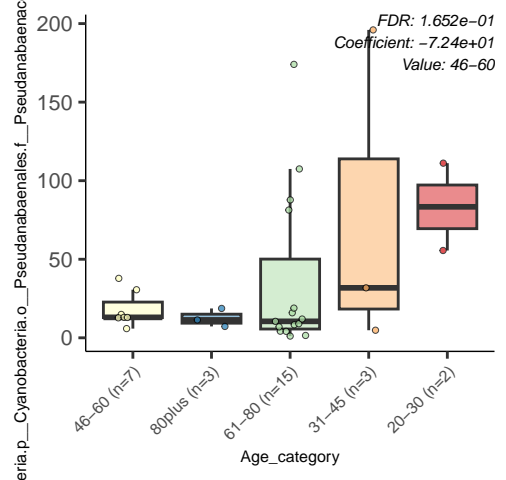

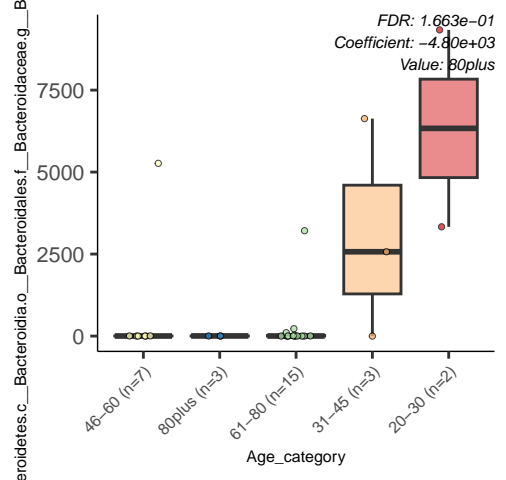



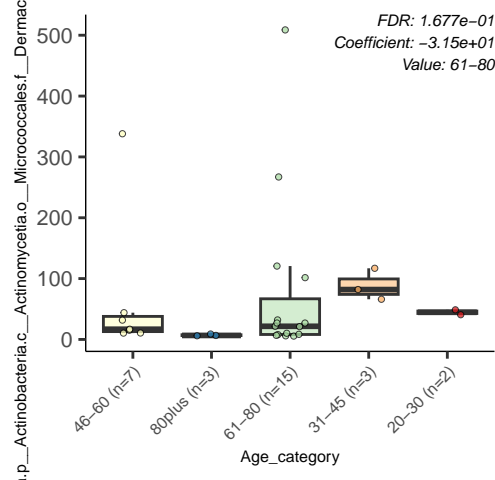

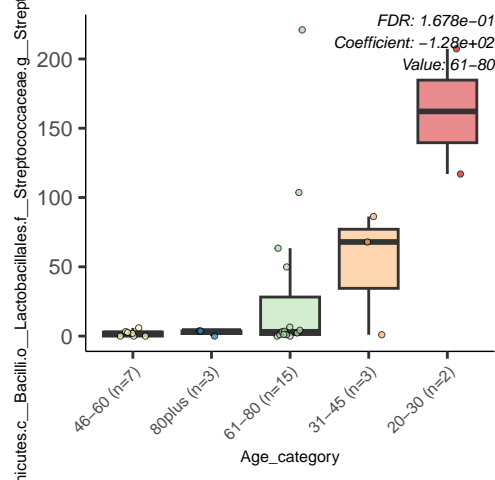

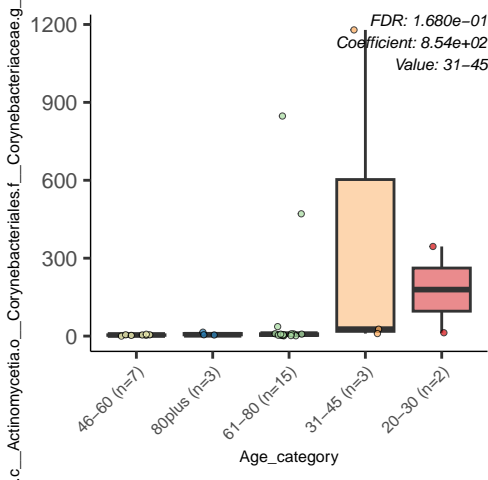

p\_\_Bacteroidetes.c\_\_Flavobacteriia.o\_\_Flavobacteriales.f\_\_Weeks

FDR: 1.687e-01  
Coefficient: -1.03e+02  
Value: 46-60

1000

500

0

46-60 (n=7)

80plus (n=3)

61-80 (n=15)

31-45 (n=3)

20-30 (n=2)

Age\_category

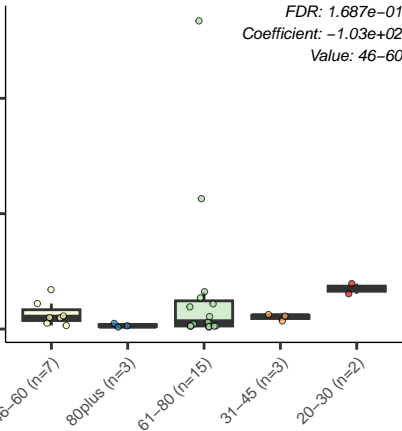

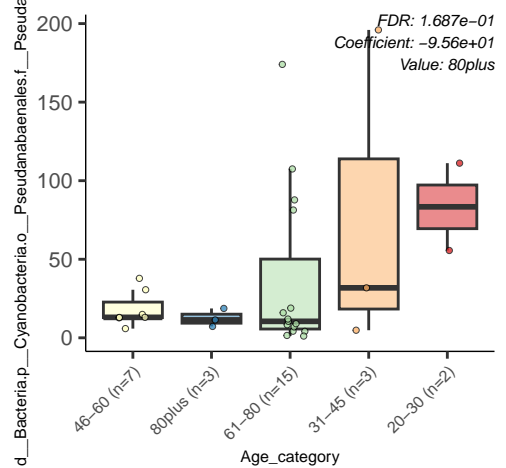



eria.p\_\_Cyanobacteria.o\_\_Pseudanabaenales.f\_\_Pseudanabaena

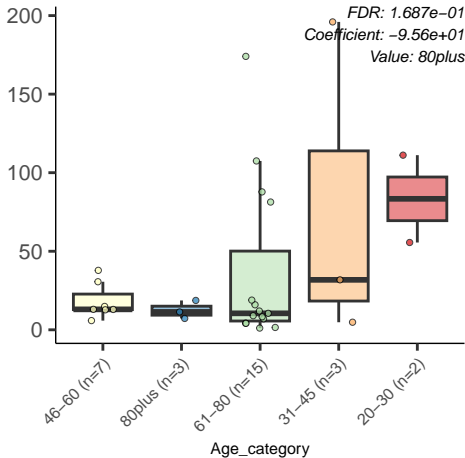

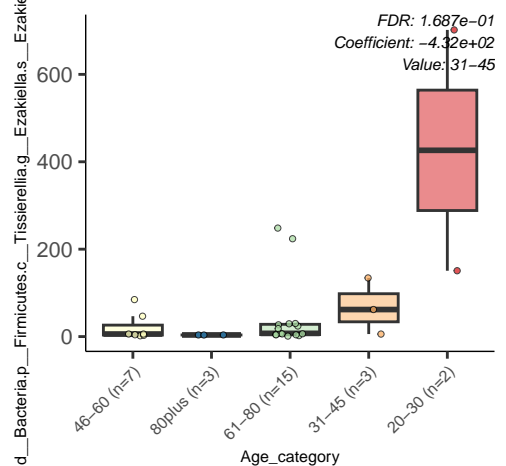

acteria.p\_\_Proteobacteria.c\_\_Gammaproteobacteria.o\_\_Orbales.f\_\_C

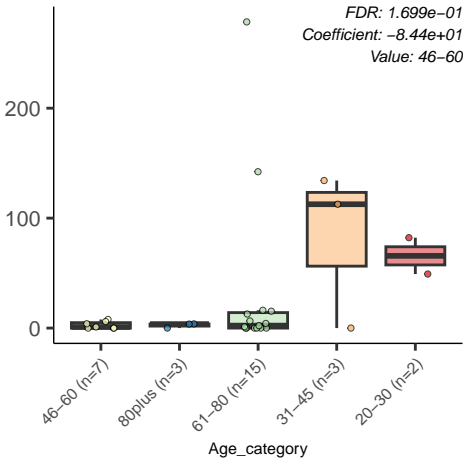

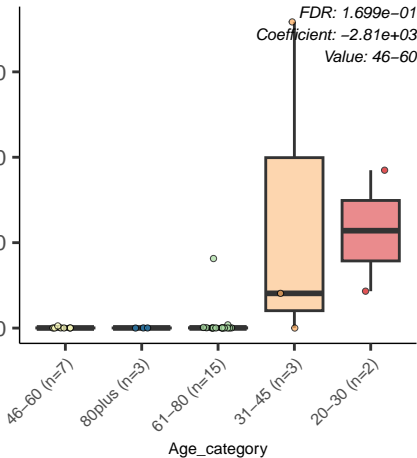

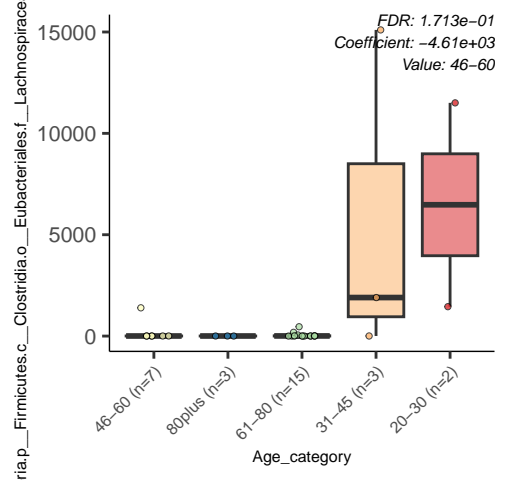

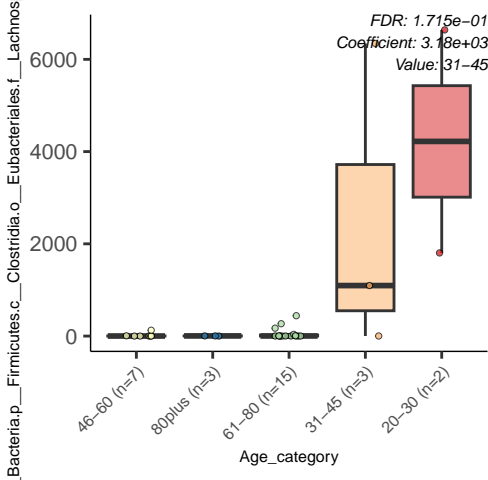

Firmicutes.c\_\_Clostridia.o\_\_Eubacteriales.f\_\_Lachnospiraceae.g

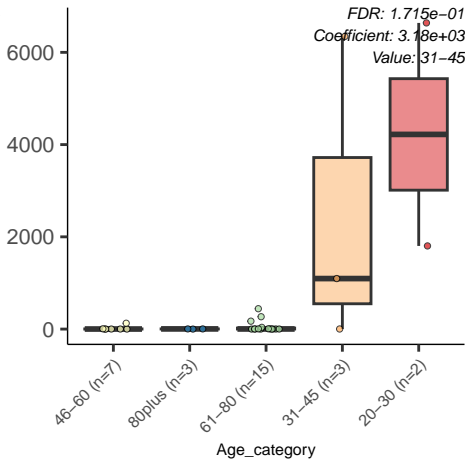

bacteria.p\_\_Proteobacteria.c\_\_Alphaproteobacteria.o\_\_Hyphomicrob

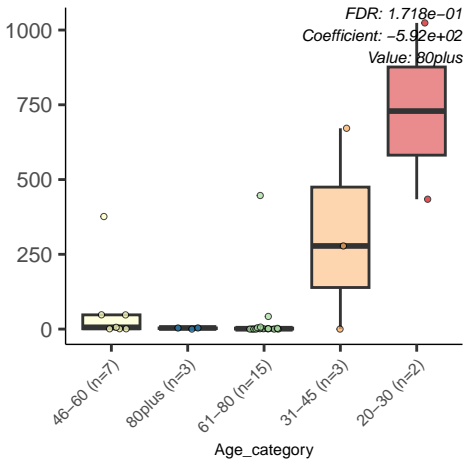



Proteobacteria.c\_\_Alphaproteobacteria.o\_\_Hyphomicrobiales.g\_\_Tetrasphaera

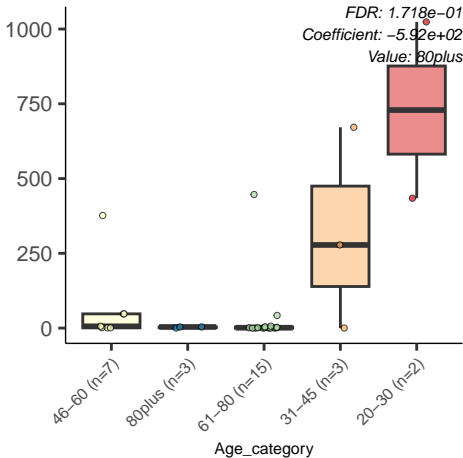

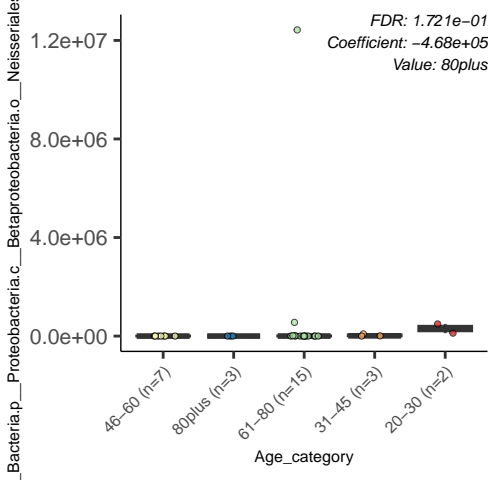

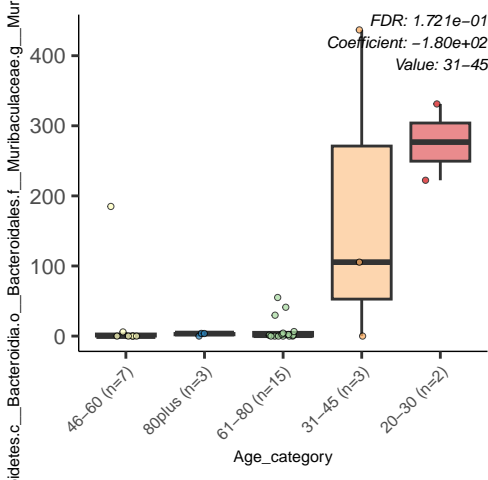

eria.p\_\_Proteobacteria.c\_\_Alphaproteobacteria.o\_\_Rhodobacterales

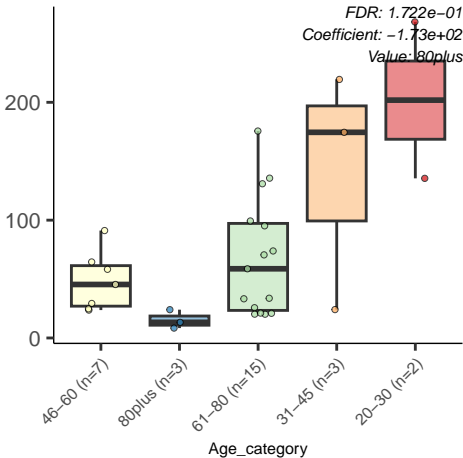

p\_\_Firmicutes.c\_\_Erysipelotrichia.o\_\_Erysipelotrichales.f\_\_Erysipe

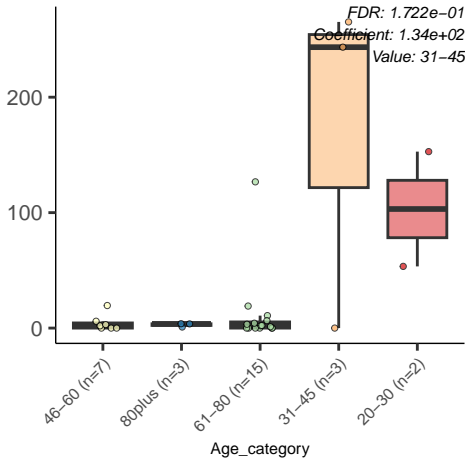

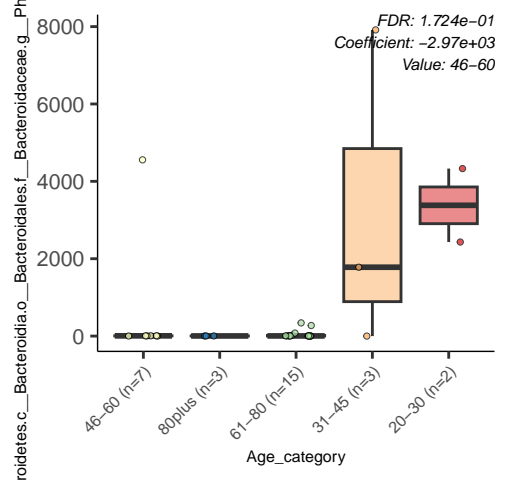

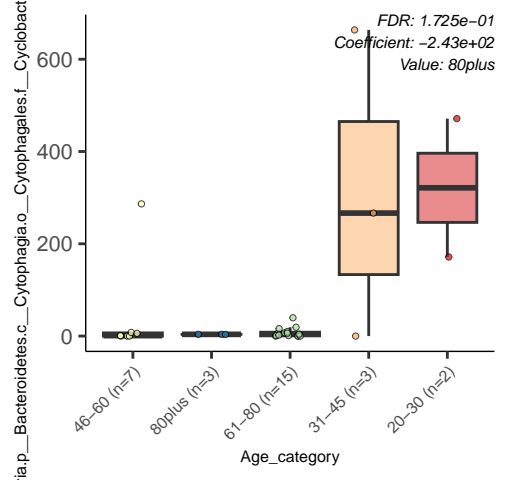

rmicutes.c\_\_Bacilli.o\_\_Lactobacillales.f\_\_Streptococcaceae.g\_\_Stre

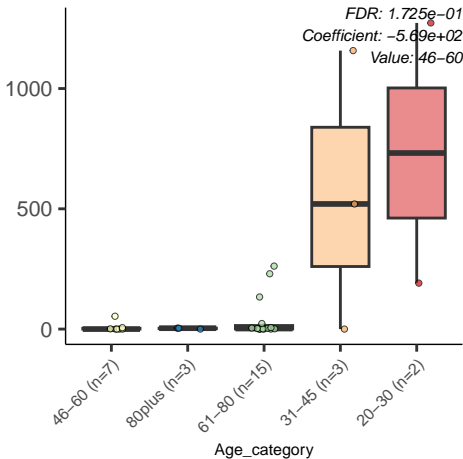



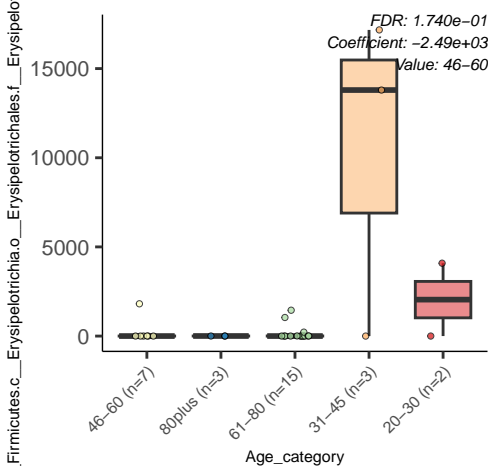

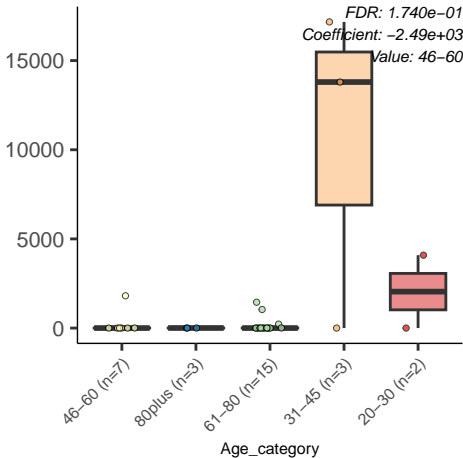

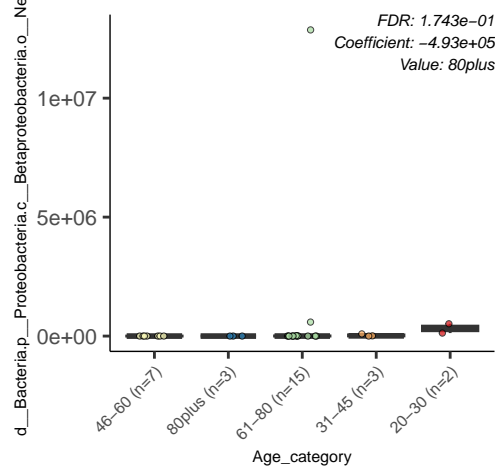

p\_\_Firmicutes.c\_\_Erysipelotrichia.o\_\_Erysipelotrichales.f\_\_Erysipe

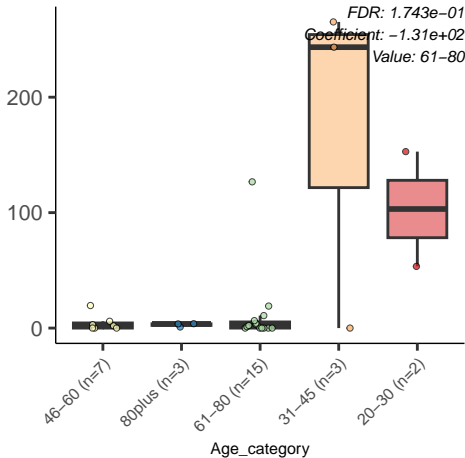

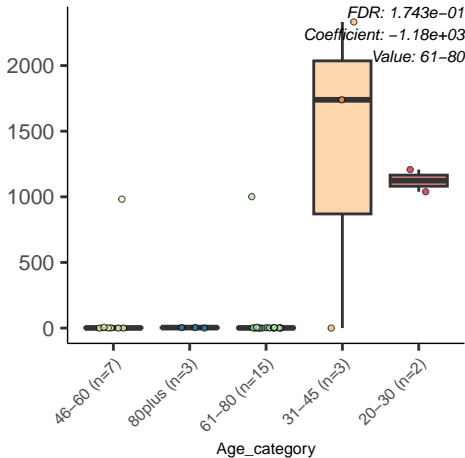

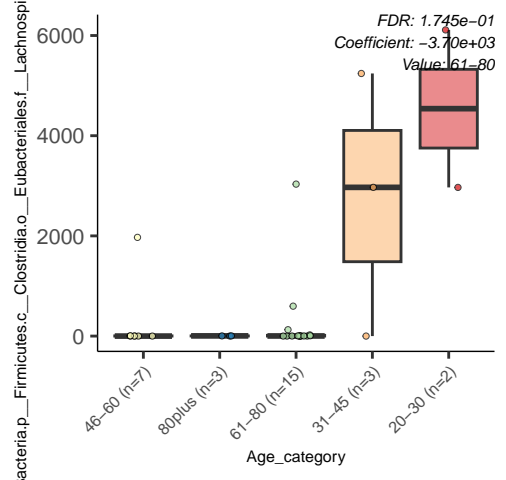

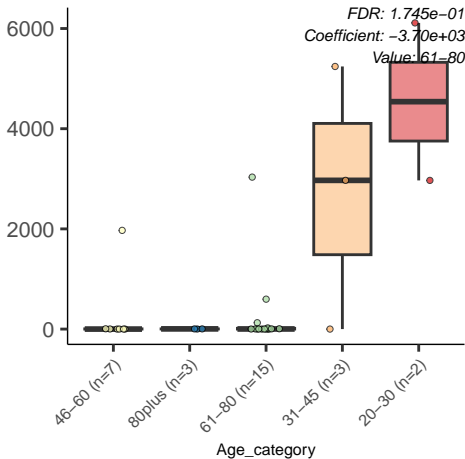

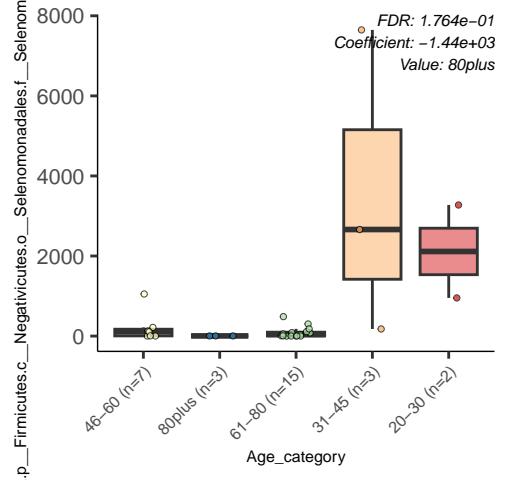



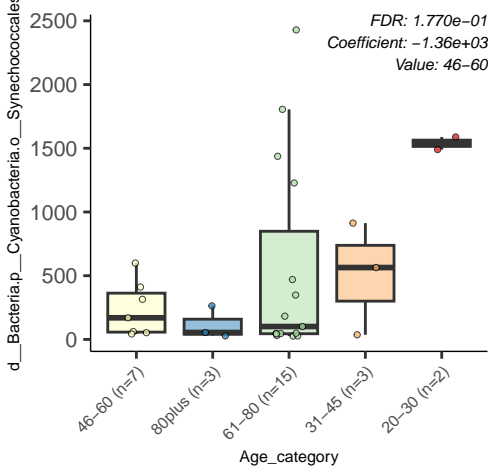

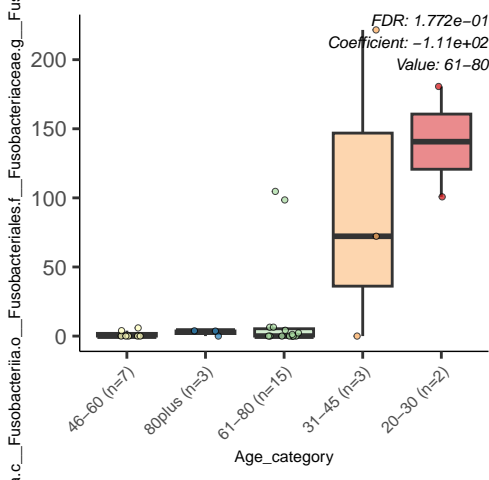

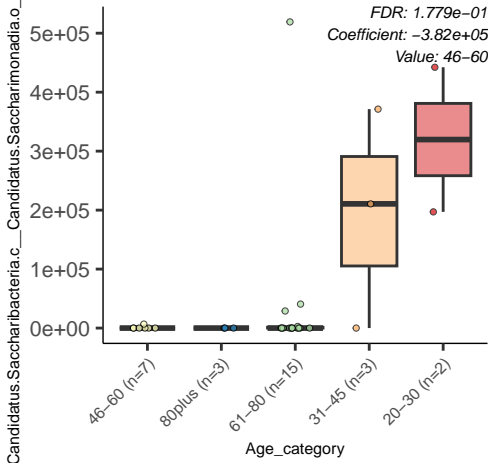

naribacteria.c\_\_Candidatus.Saccharimonadia.o\_\_Candidatus.Nanos

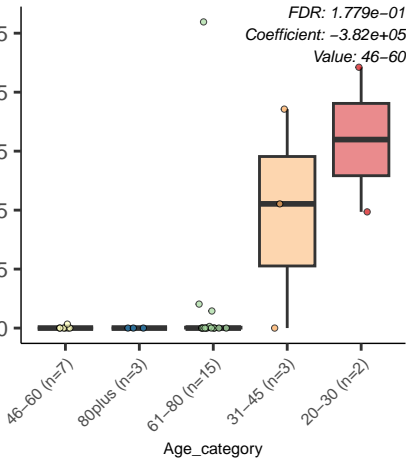

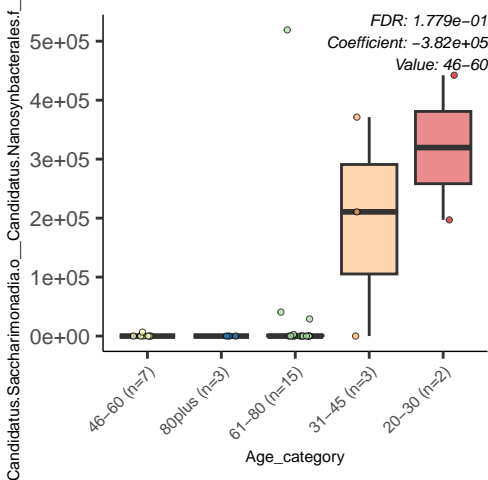

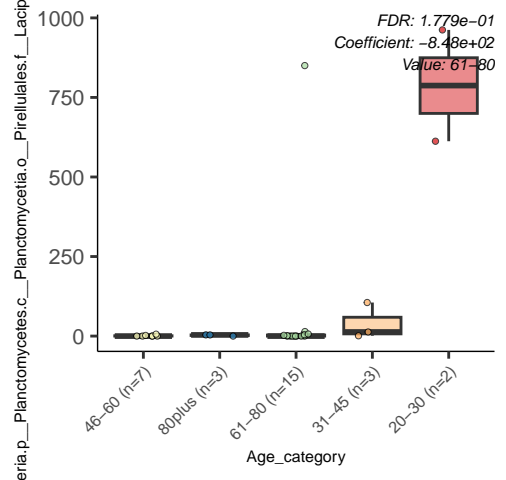

ctomycetes.c\_\_Planctomycetia.o\_\_Pirellulales.f\_\_Lacipirellulaceae.

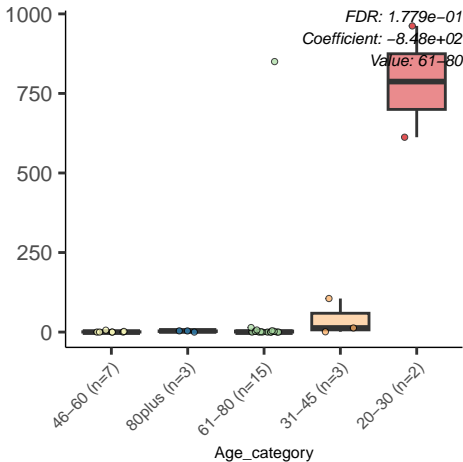

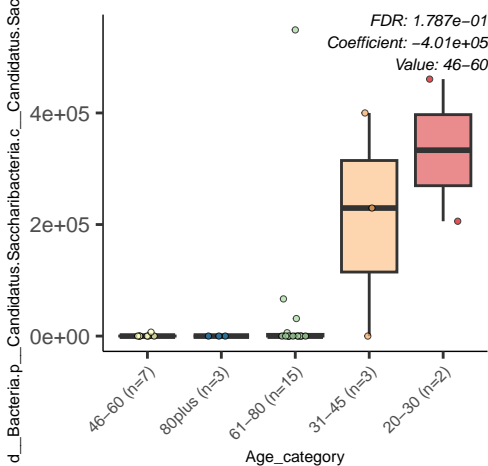



acteria.c\_Actinomycetia.o\_Actinomycetales.f\_Actinomycetaceae

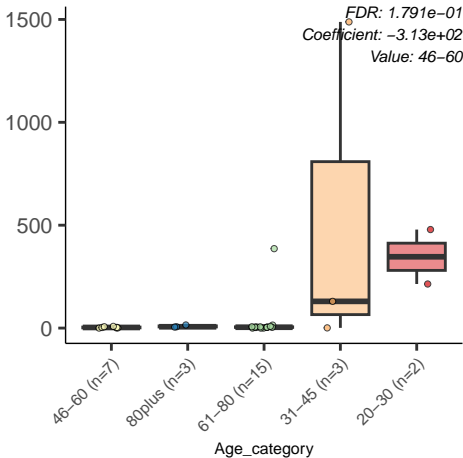

Bacteria.p\_Firmicutes.c\_Bacilli.o\_Bacillales.g\_Gemella.s\_G

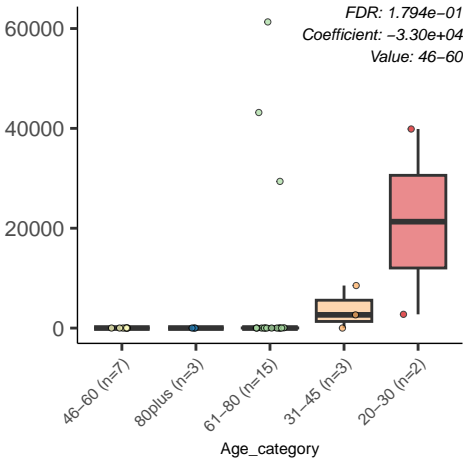

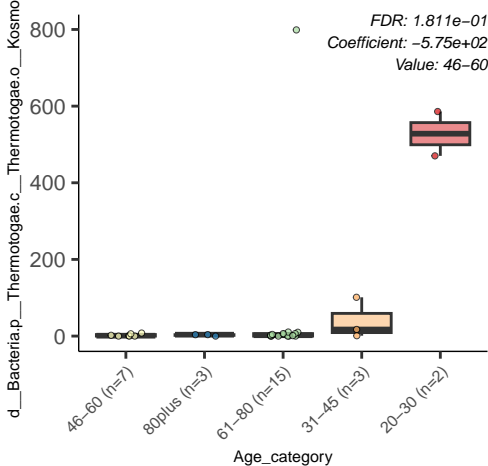

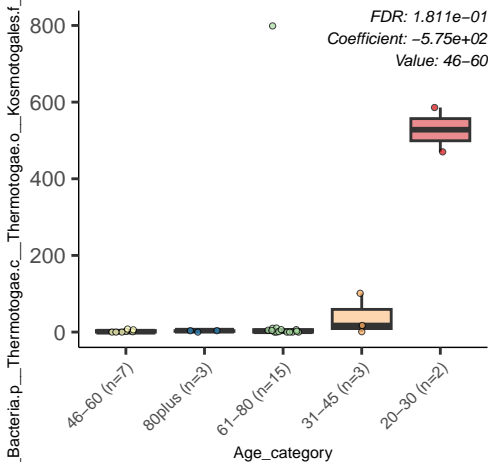

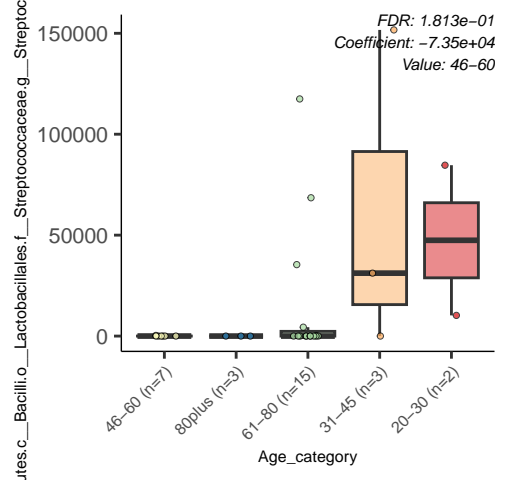

d\_\_Bacteria.p\_Actinobacteria.c\_Actinomycetia.o\_Coryneb

FDR: 1.815e-01  
Coefficient: 1.15e+05  
Value: 46-60

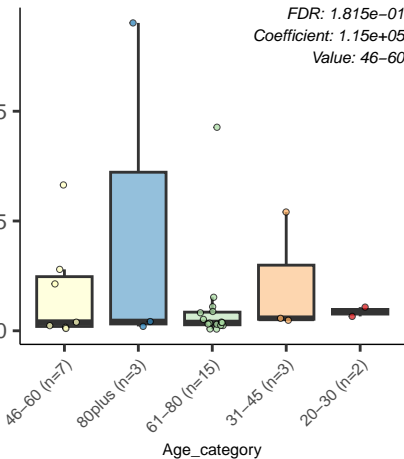

d\_Bacteria.p\_Acidobacteria

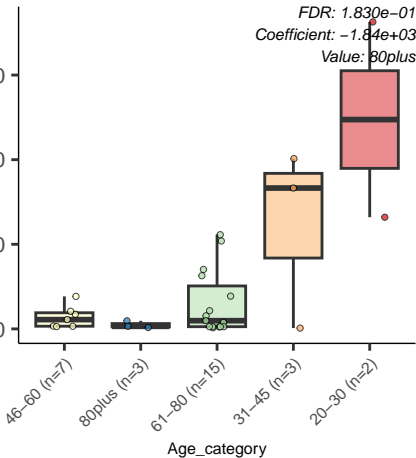

bacteria.p\_\_Firmicutes.c\_\_Clostridia.o\_\_Eubacteriales.f\_\_Clostridiace

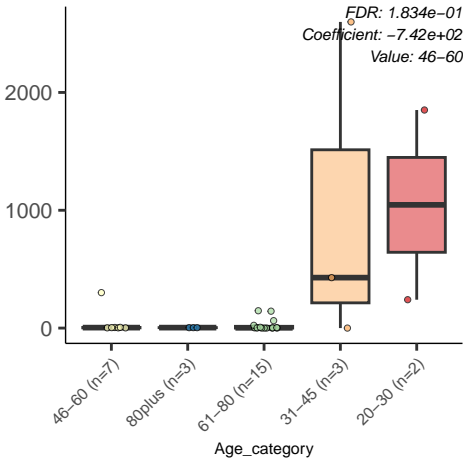



icutes.c\_\_Clostridia.o\_\_Eubacteriales.f\_\_Clostridiaceae.g\_\_Serpen

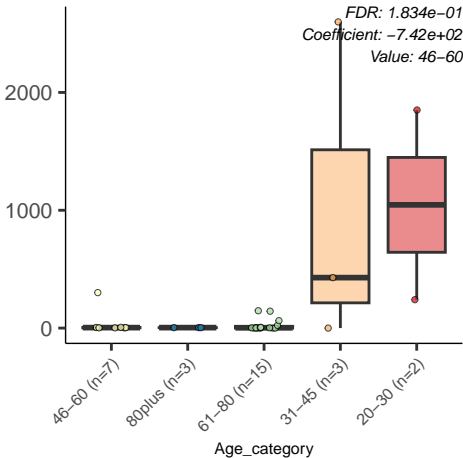

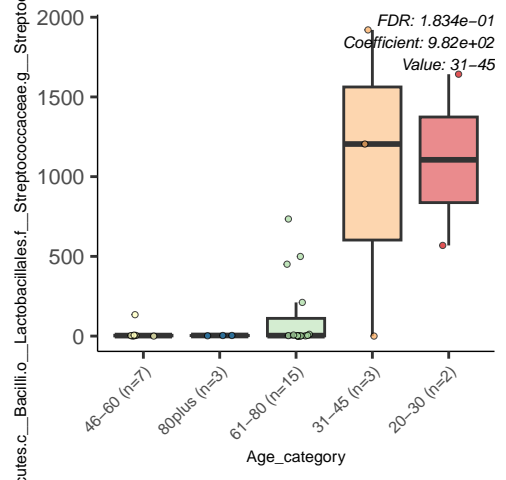

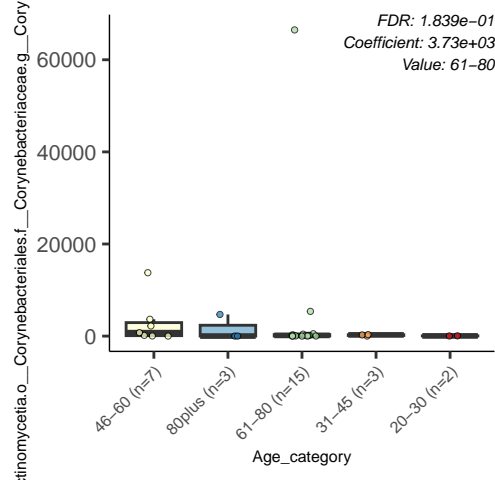

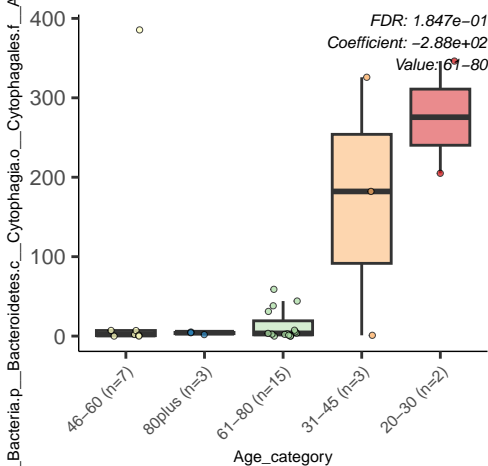

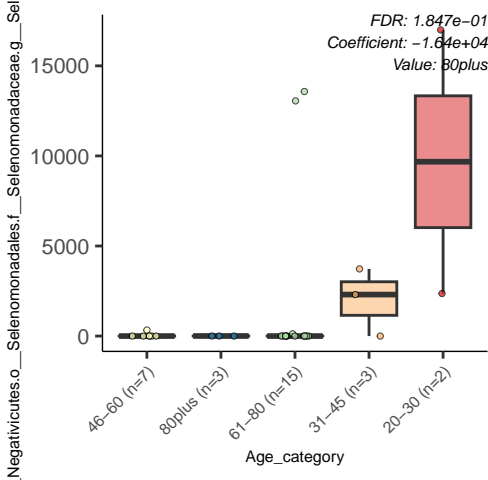

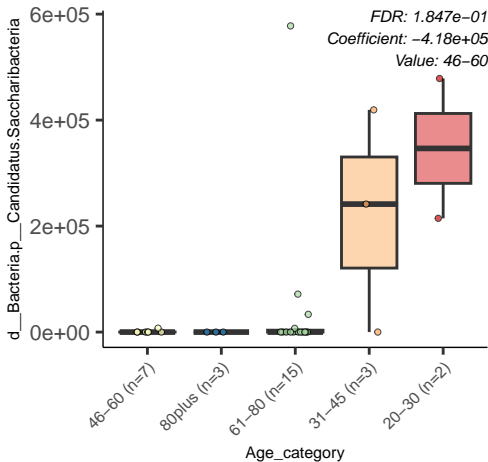

Actinobacteria.c\_Actinomycetia.o\_Corynebacteriales.f\_Mycobac

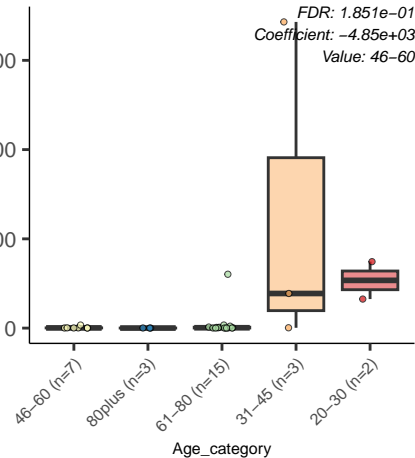

icutes.c\_\_Tissierellia.o\_\_Tissierellales.f\_\_Peptoniphilaceae.g\_\_Ana

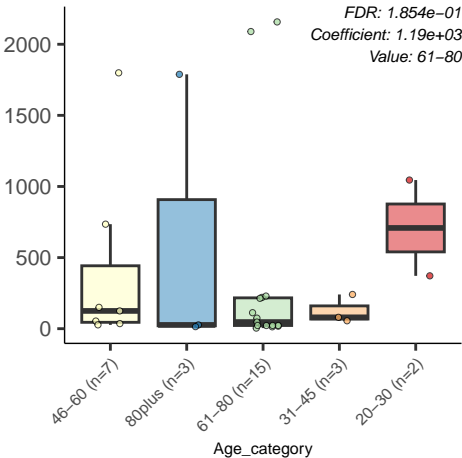



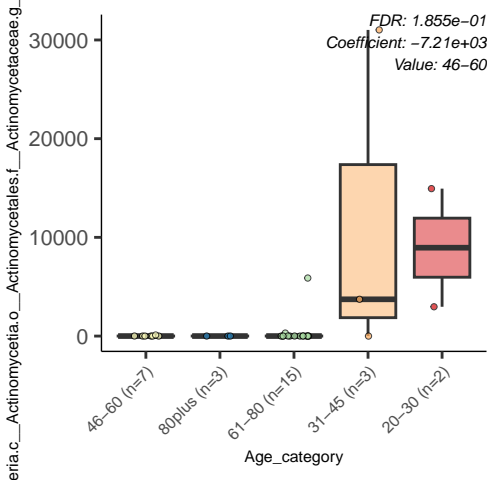

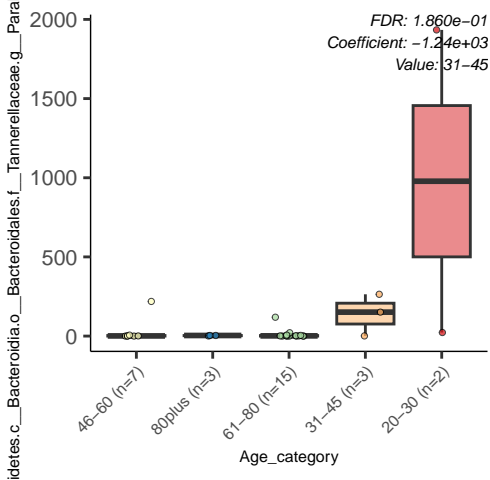

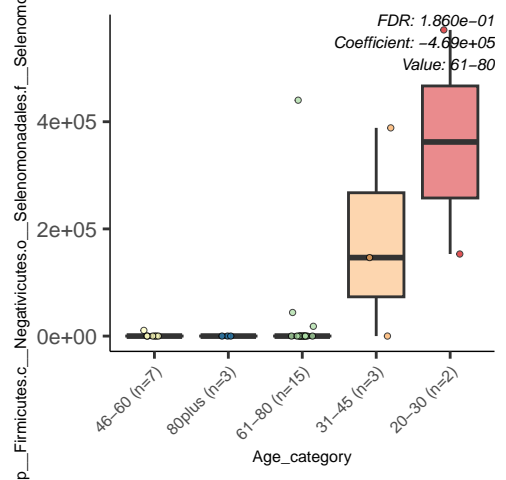

d\_\_Bacteria.p\_\_Deinococcus.Thermus

FDR:  $1.862e-01$   
Coefficient:  $-1.11e+03$   
Value: 31-45

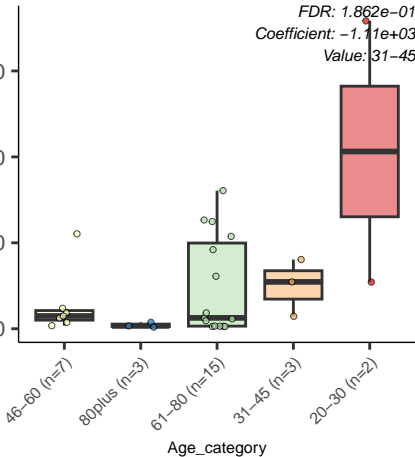

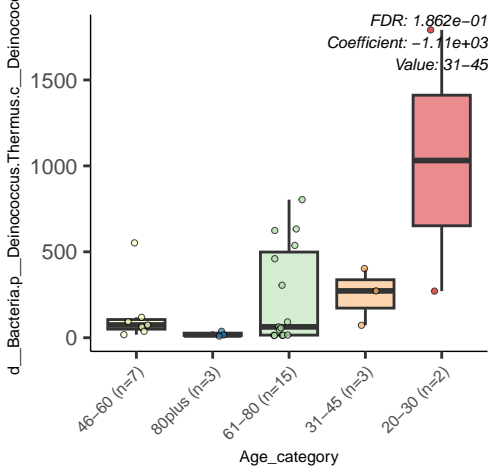

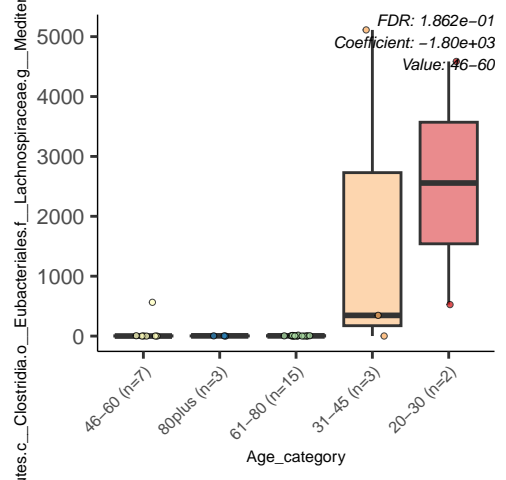

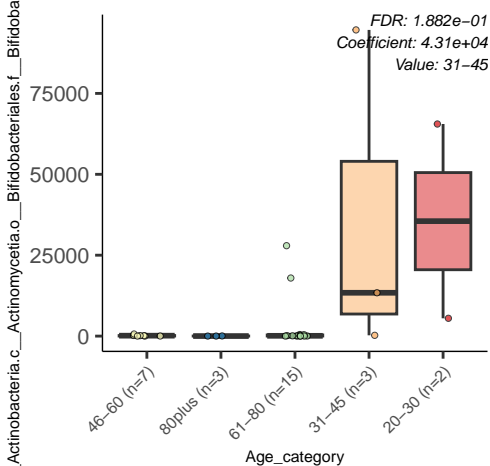

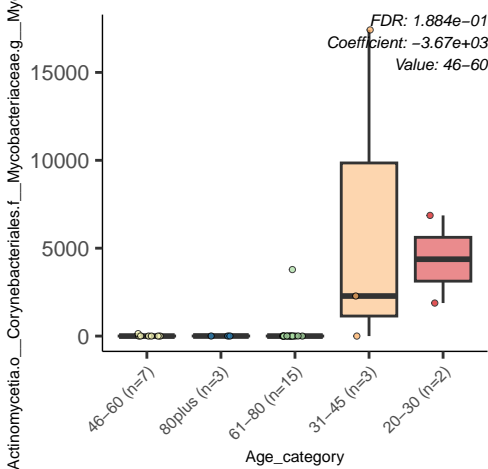



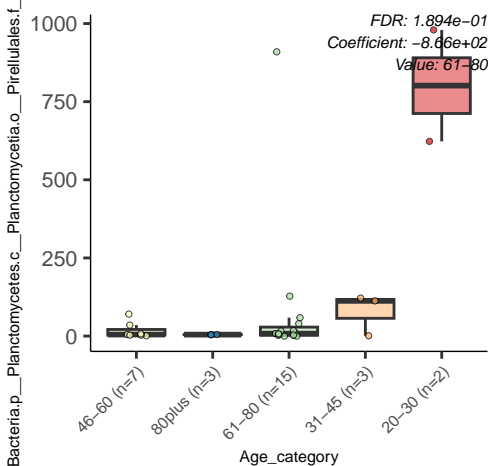

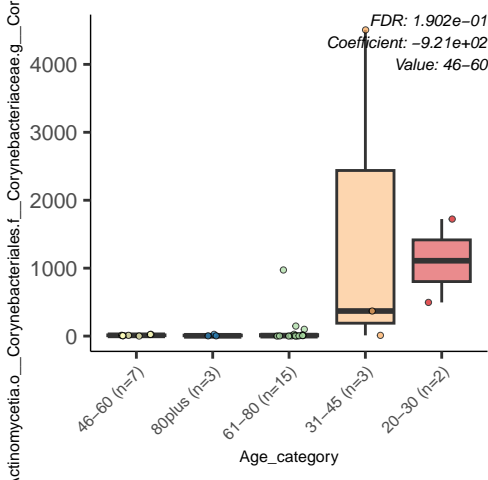

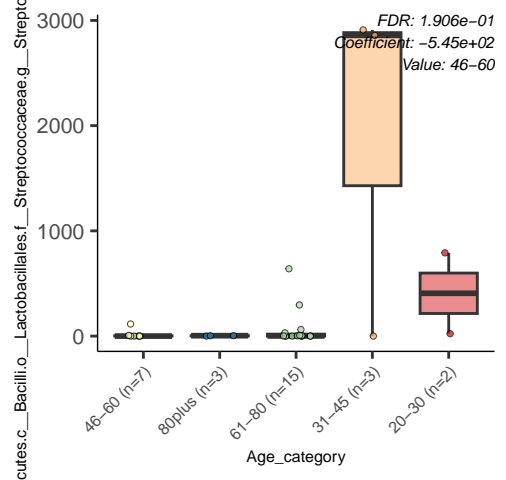

d\_\_Bacteria.p\_\_Gemmatimonadetes

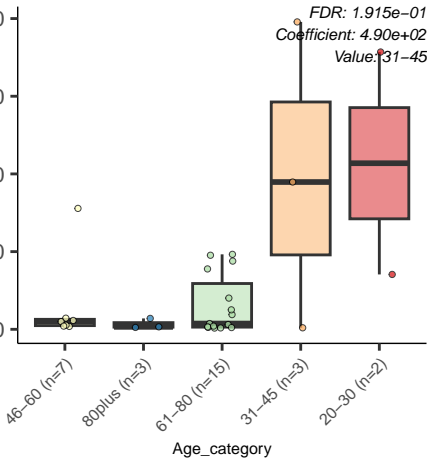

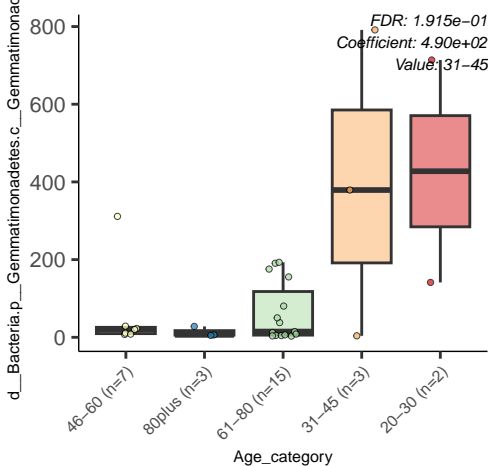

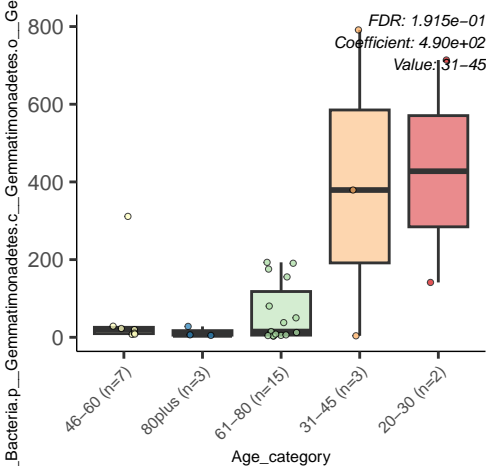

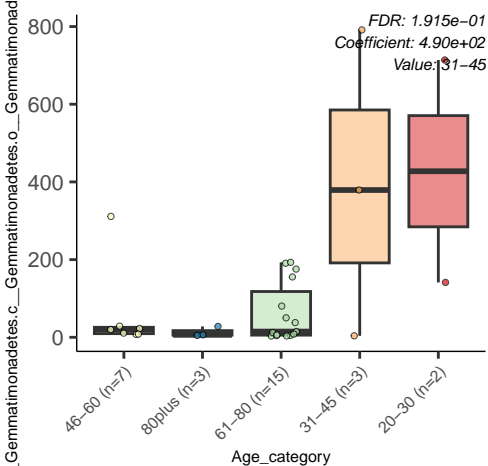

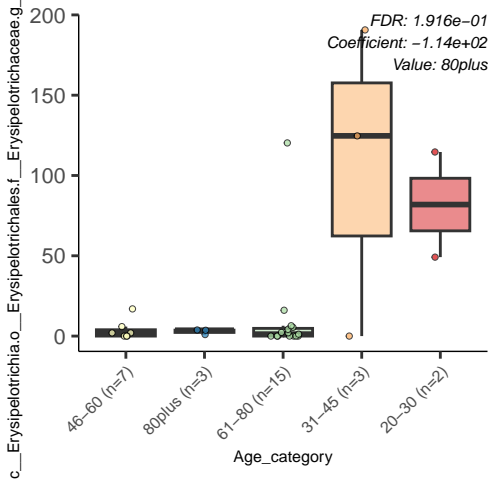



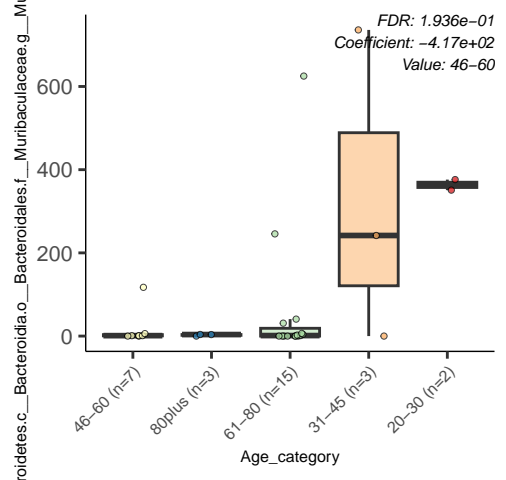

Bacteria.p\_\_Bacteroidetes.c\_\_Flavobacteriia.o\_\_Flavobacteriales.f\_\_

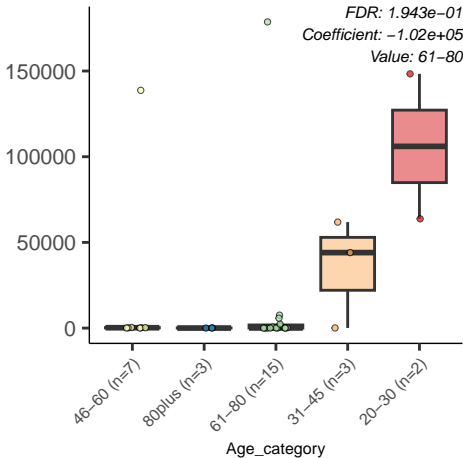

Actinobacteria.c\_Actinomyces.o\_Pseudonocardiales.f\_Pseudonocardia.g\_Pseudonocardia.s\_Pseudonocardia

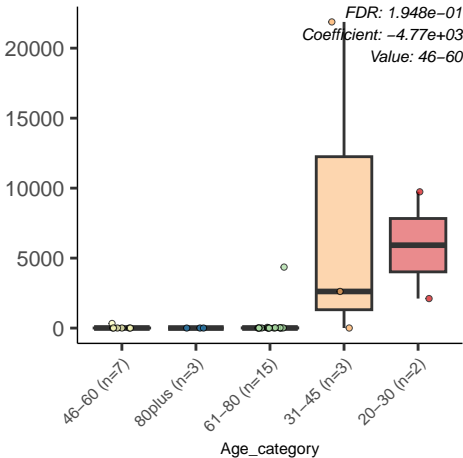



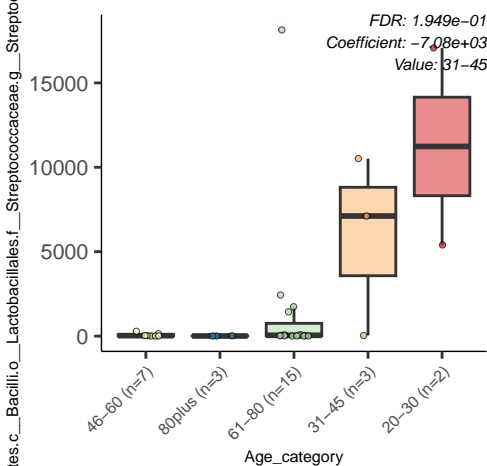

a.c\_\_Betaproteobacteria.o\_\_Burkholderiales.f\_\_Burkholderiaceae.g

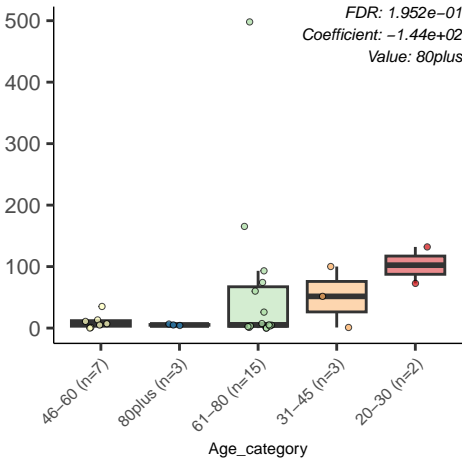

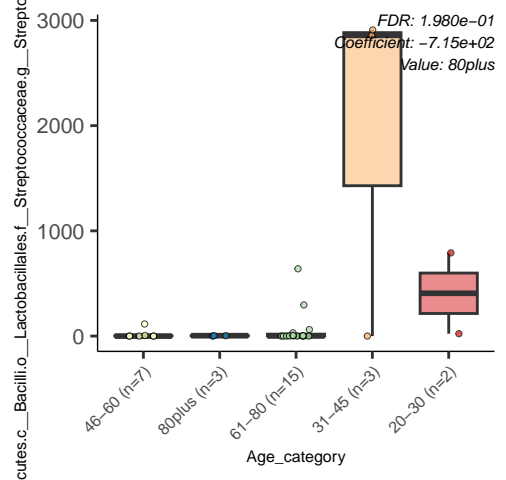

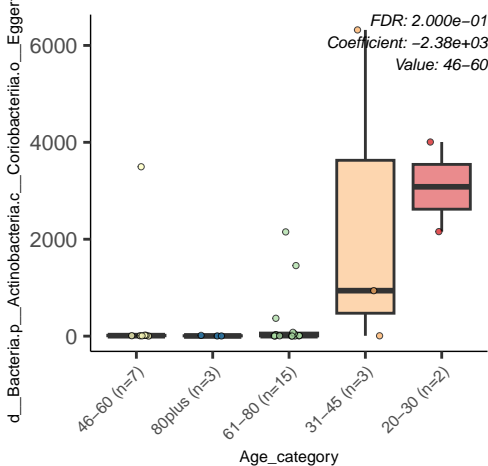



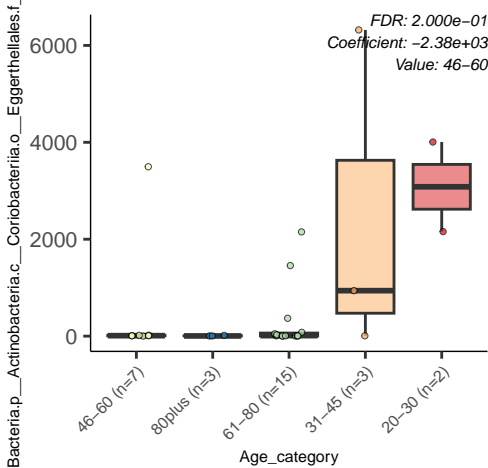

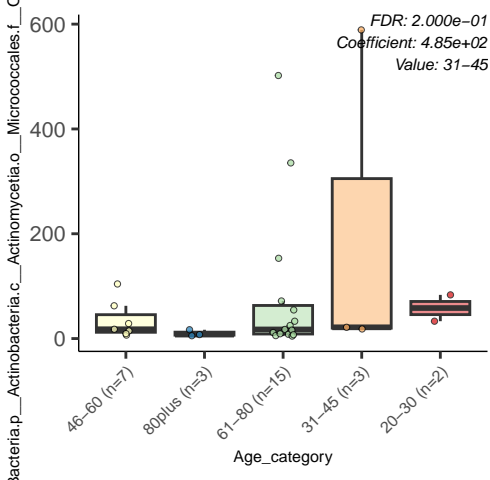

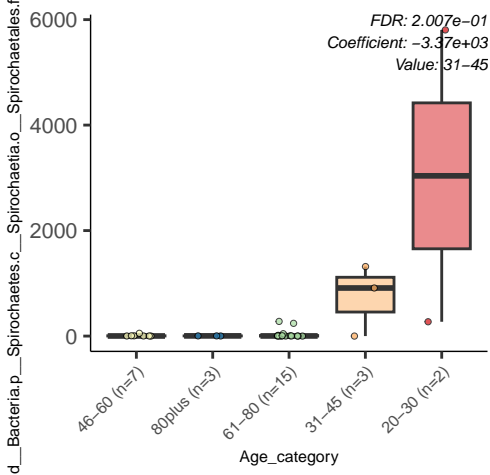

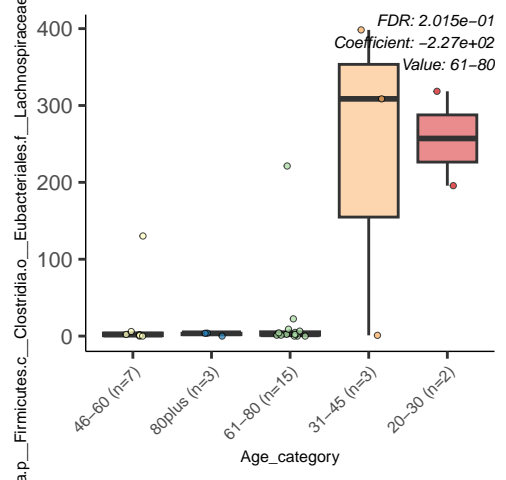

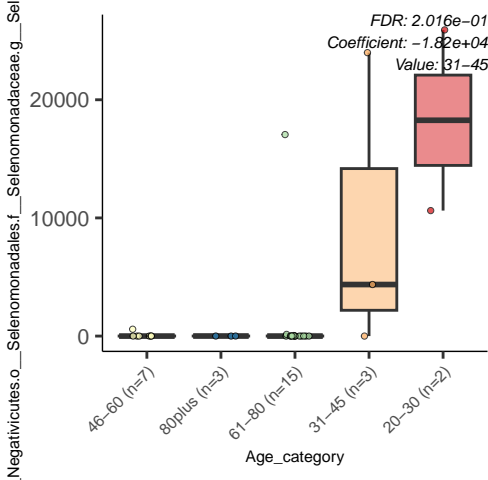

Firmicutes.c\_\_Clostridia.o\_\_Eubacteriales.f\_\_Lachnospiraceae.g

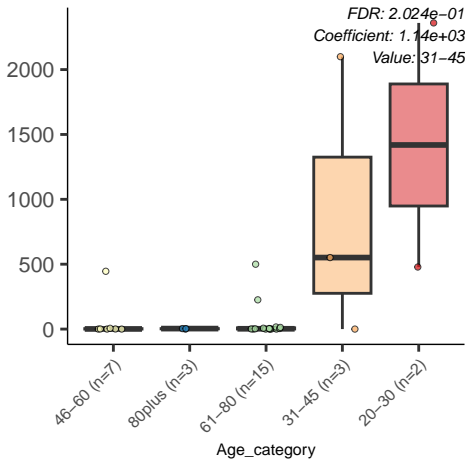

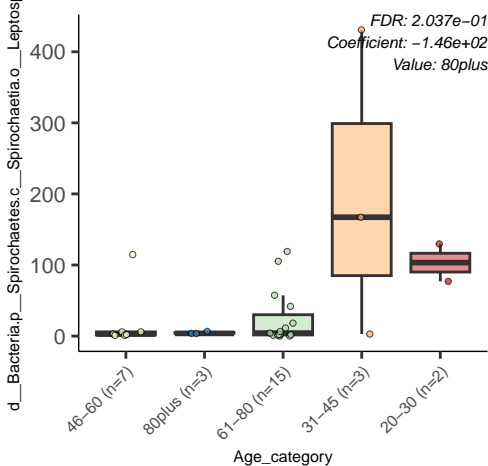

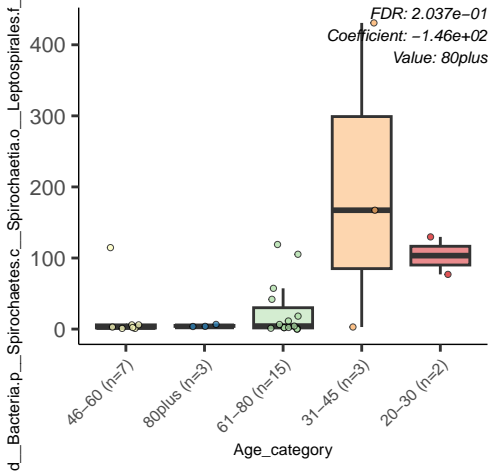



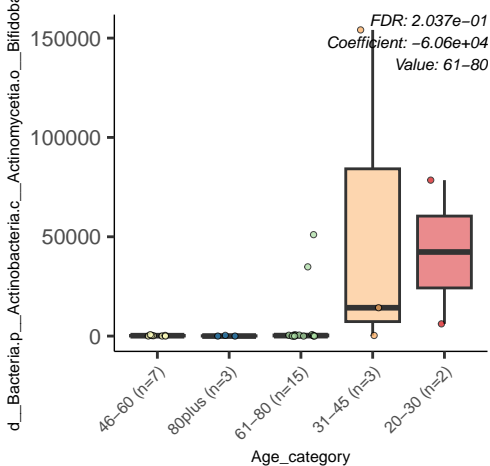

Bacteria.p\_Actinobacteria.c\_Actinomycetia.o\_Bifidobacteriales.f

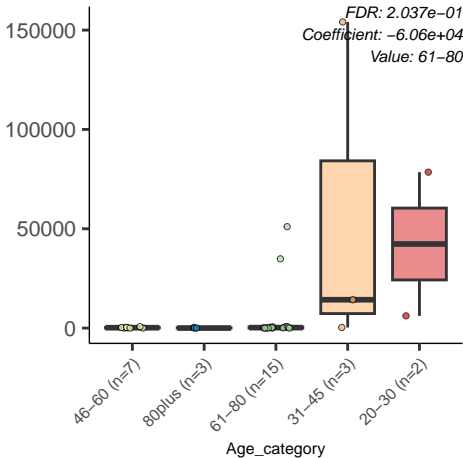

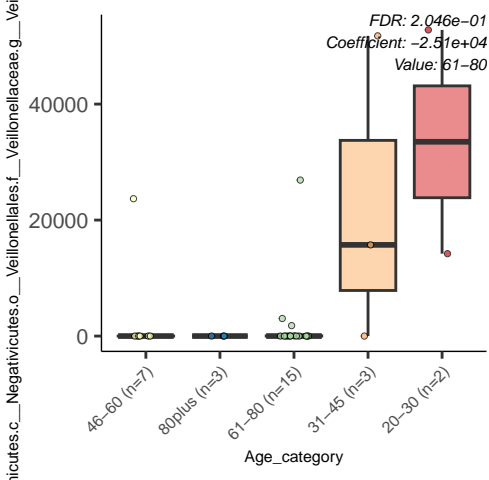

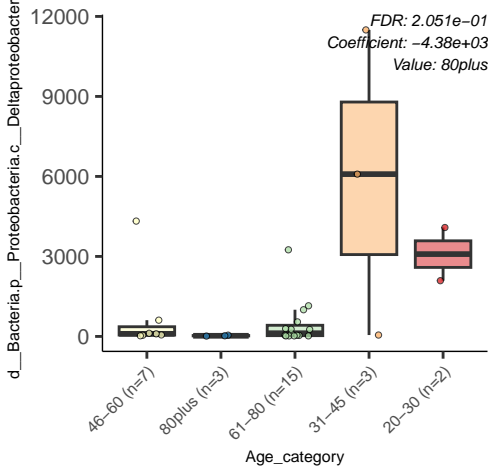

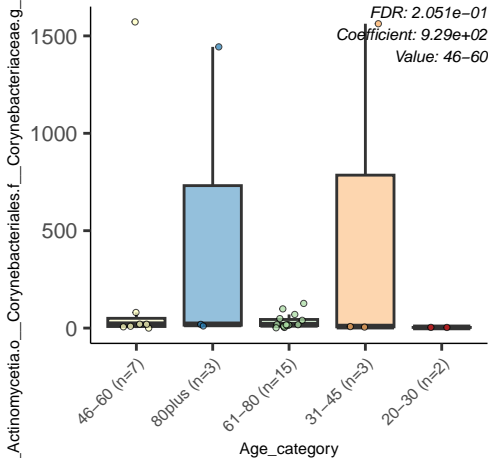

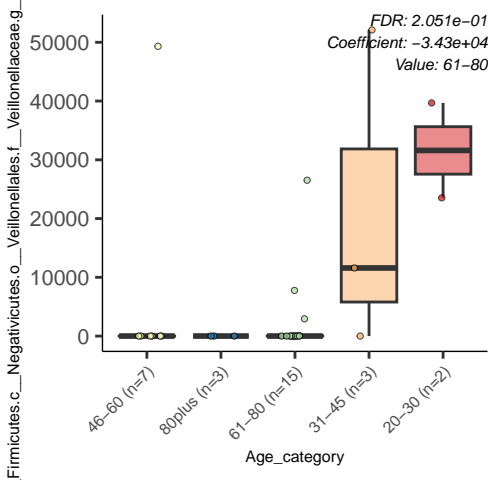

d\_Bacteria.p\_Firmicutes.c\_Clostridia

FDR: 2.055e-01  
Coefficient: -7.43e+05  
Value: 46-60

1e+06

5e+05

0e+00

46-60 (n=7)

80plus (n=3)

61-80 (n=15)

31-45 (n=3)

20-30 (n=2)

Age\_category

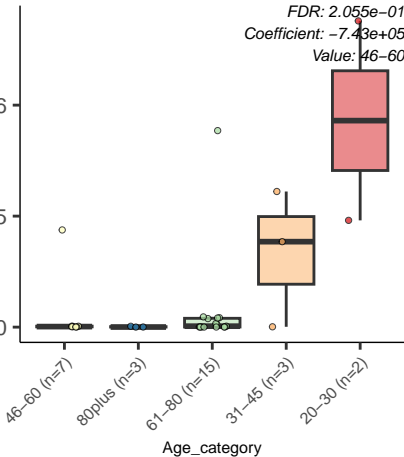

roidetes.c\_\_Bacteroidia.o\_\_Bacteroidales.f\_\_Bacteroidaceae.g\_\_Ba

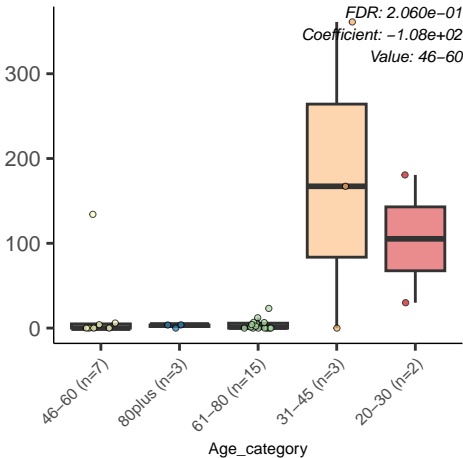



micutes.c\_\_Bacilli.o\_\_Lactobacillales.f\_\_Streptococcaceae.g\_\_Stre

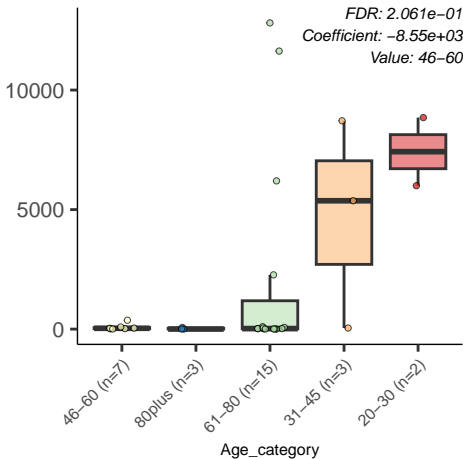

icutes.c\_\_Bacilli.o\_\_Lactobacillales.f\_\_Streptococcaceae.g\_\_Strept

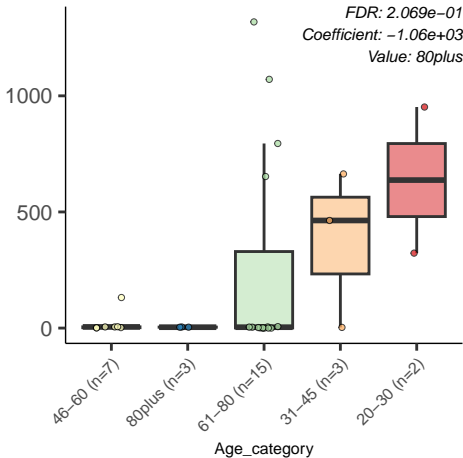

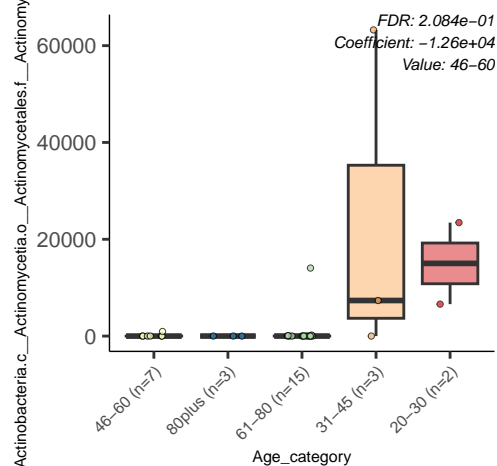

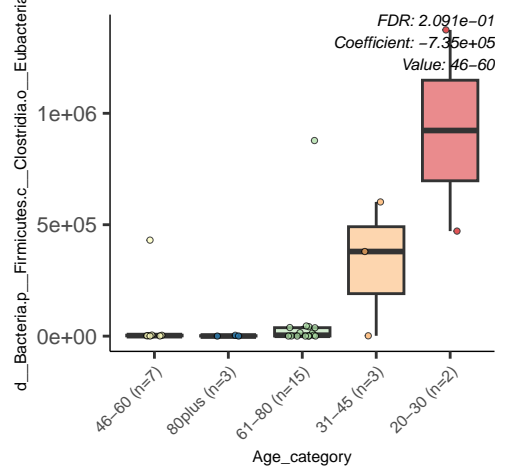

bacteria.p\_\_Proteobacteria.c\_\_Alphaproteobacteria.o\_\_Hyphomicrob

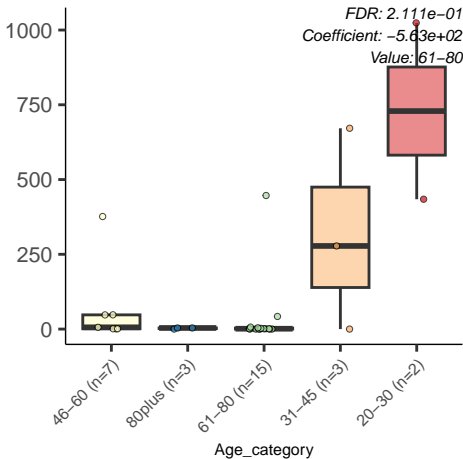

Proteobacteria.c\_\_Alphaproteobacteria.o\_\_Hyphomicrobiales.g\_\_Tetrasphaera

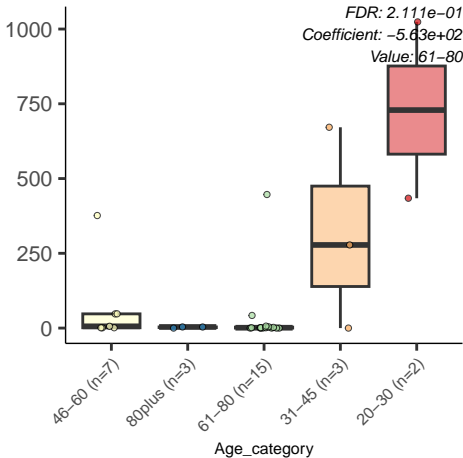

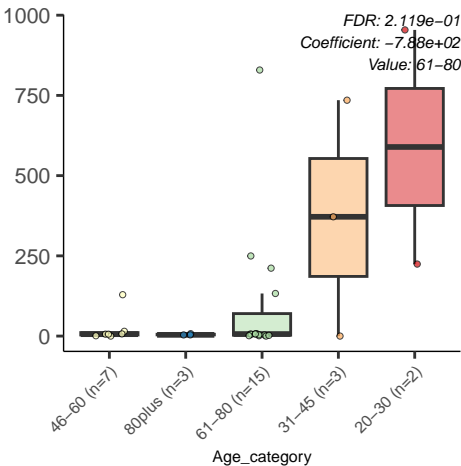

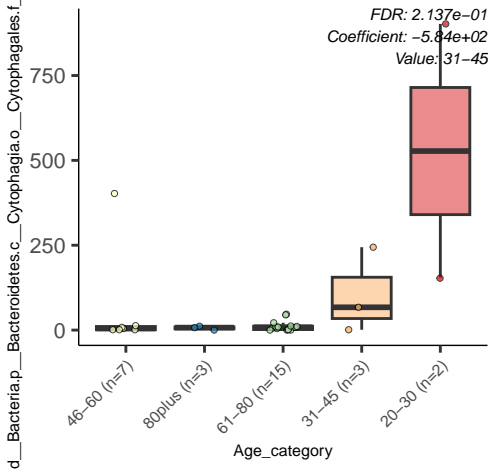



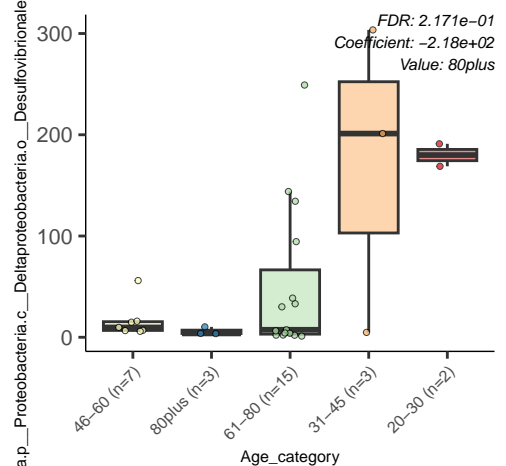

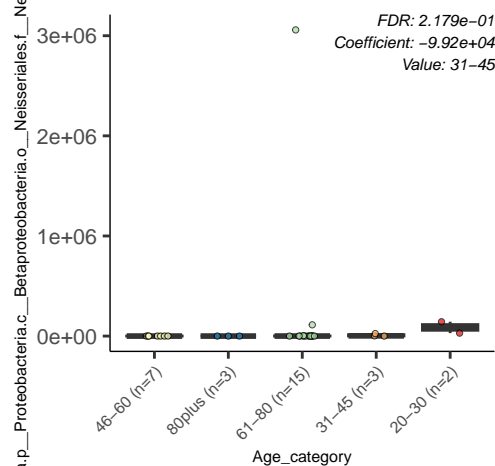

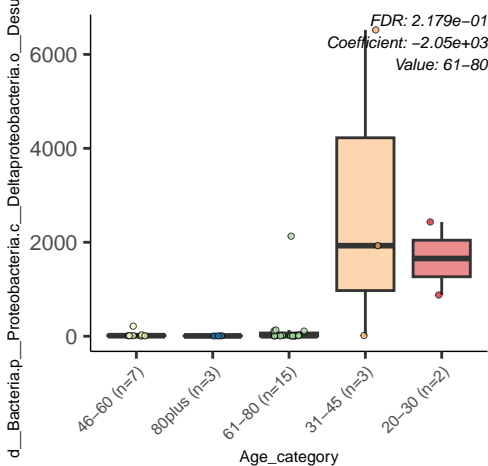

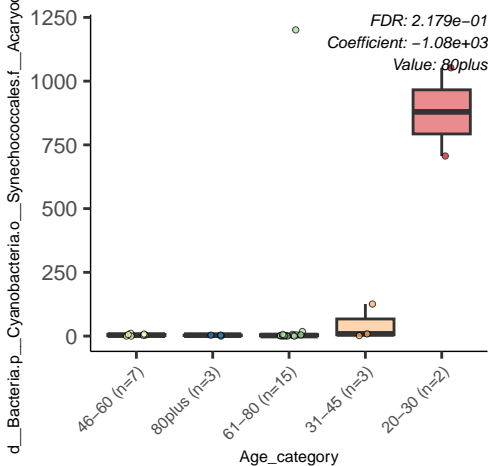

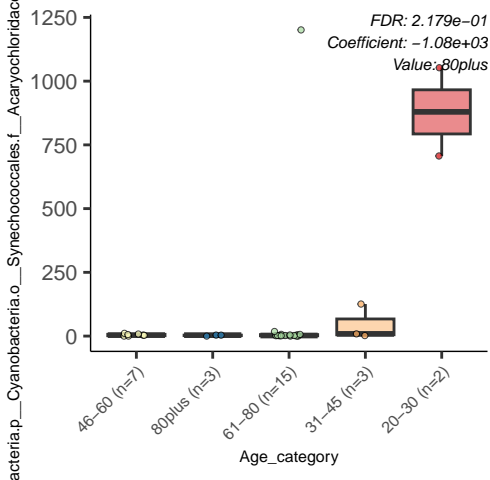

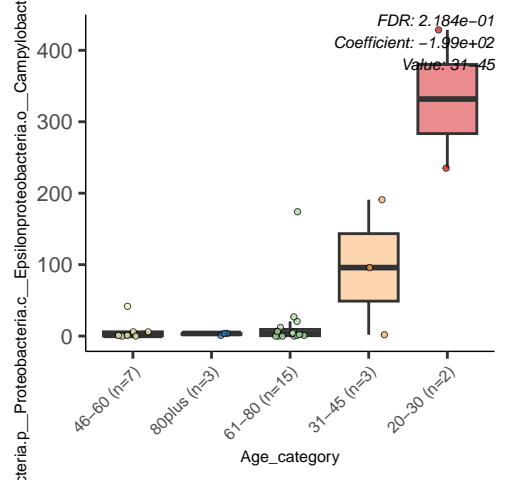

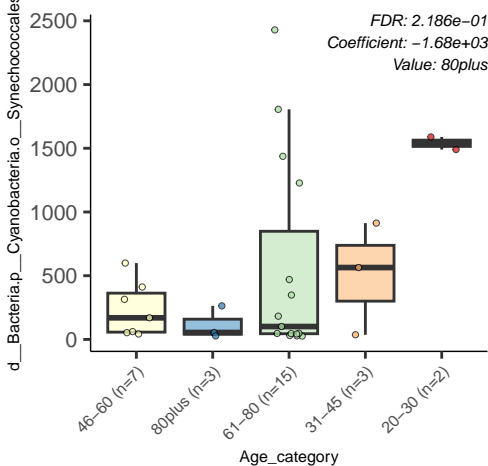

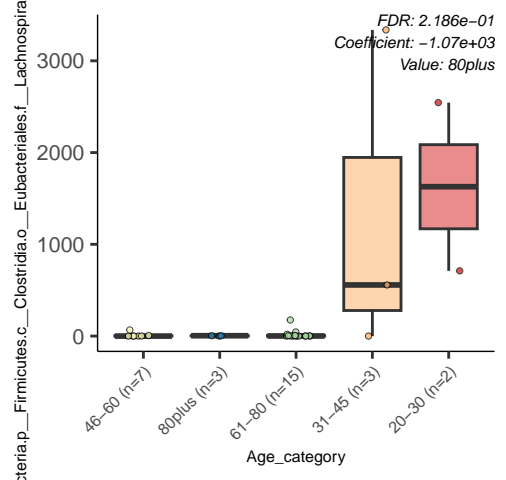



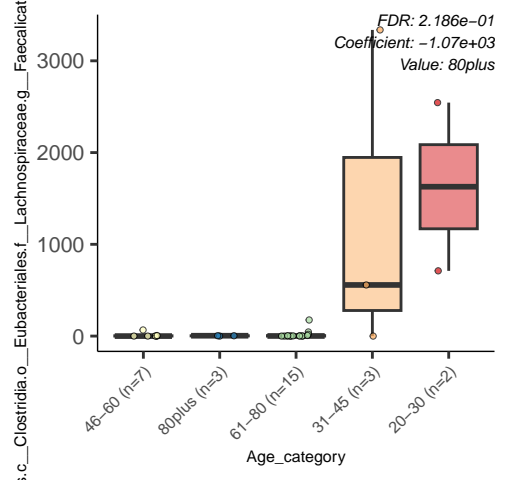

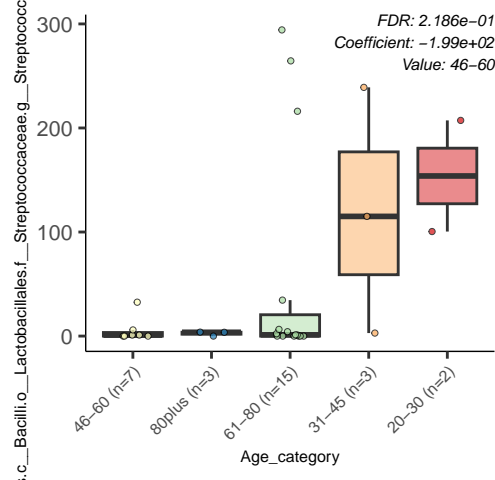

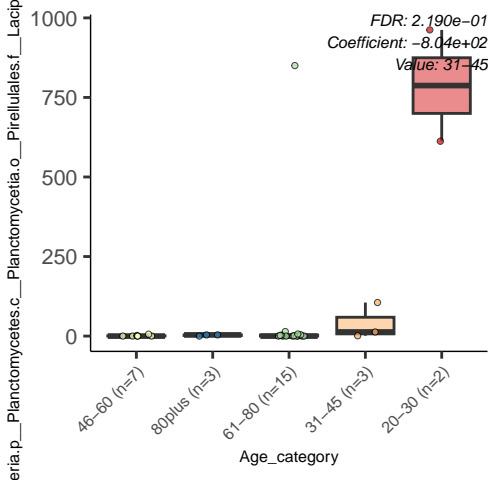

ctomycetes.c\_\_Planctomycetia.o\_\_Pirellulales.f\_\_Lacipirellulaceae.

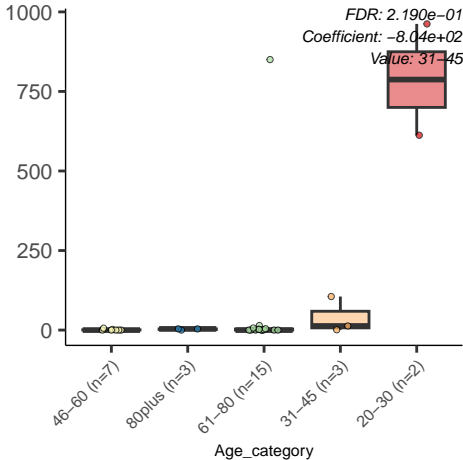

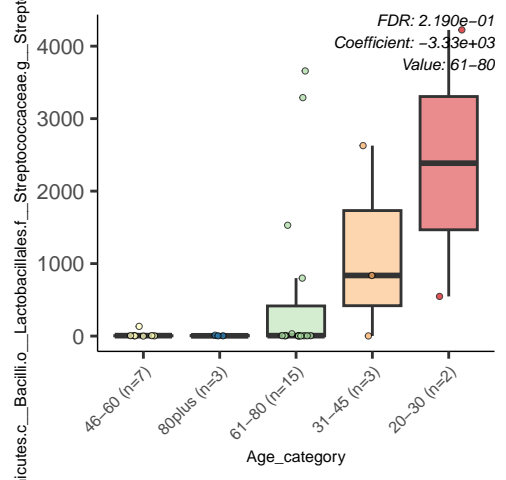

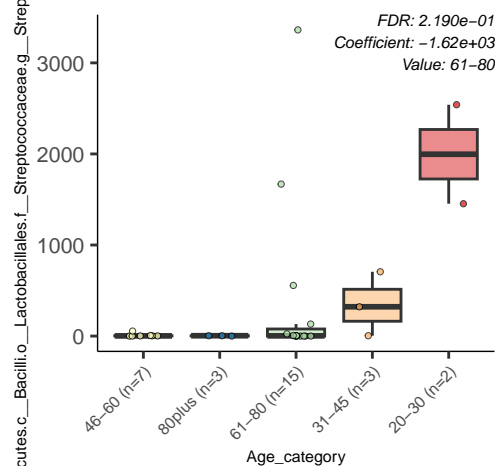

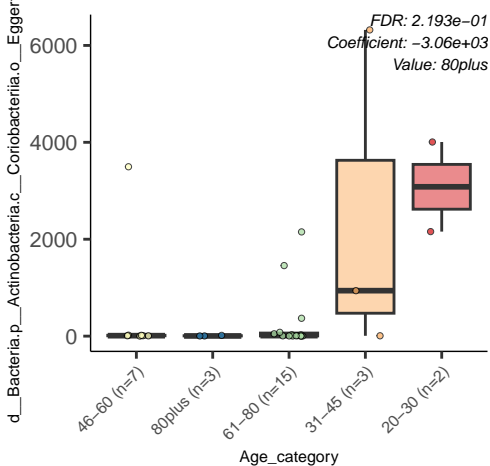

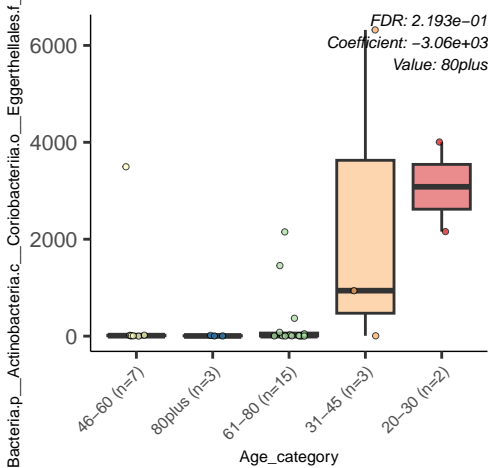



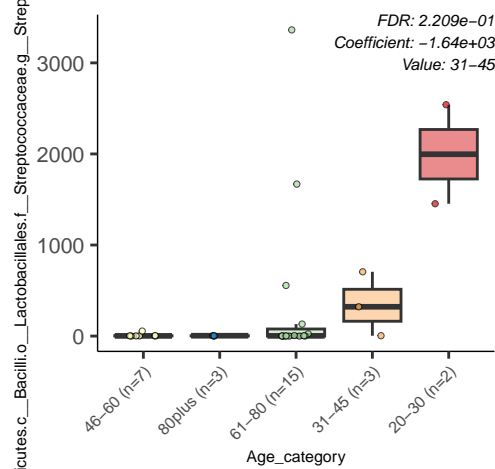

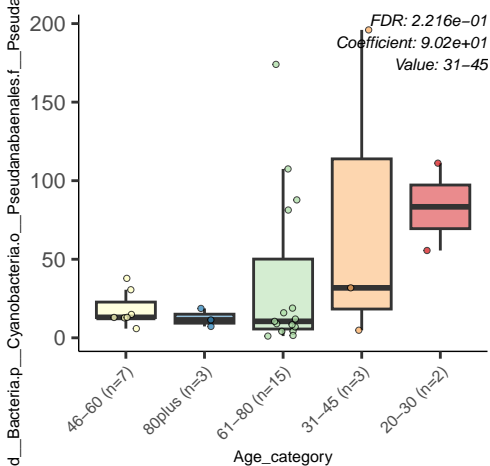

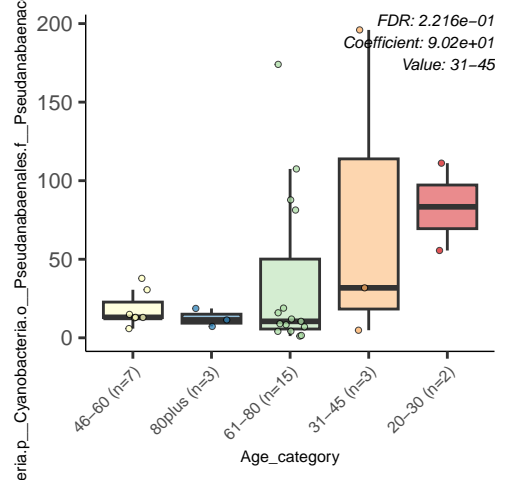

Proteobacteria.c\_\_Betaproteobacteria.o\_\_Burkholderiales.f\_\_Burkholderiales

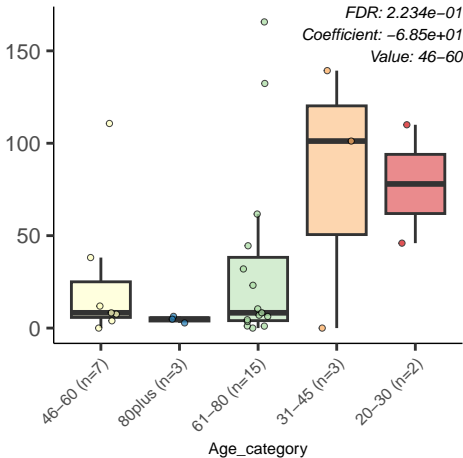

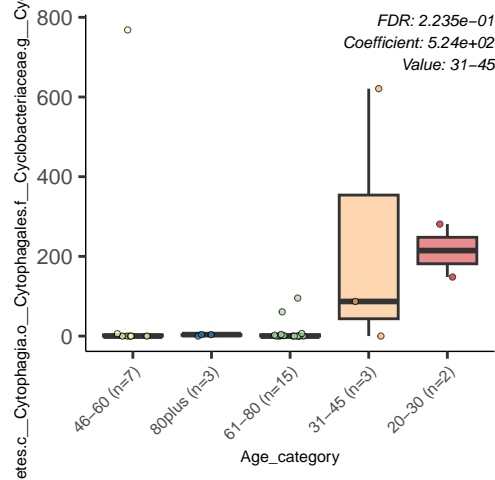

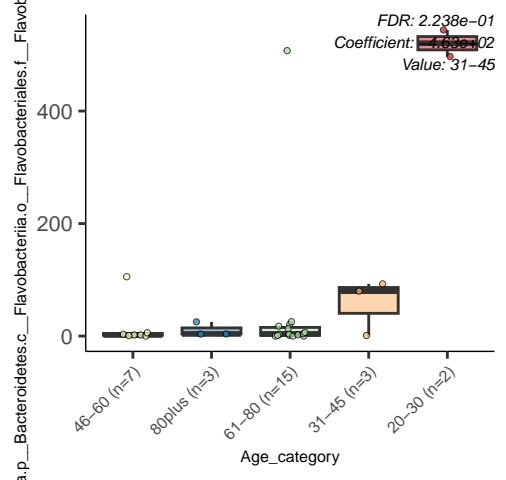

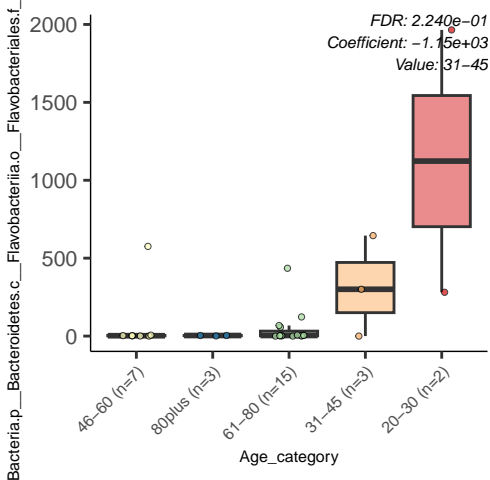

Bacteroidetes.c\_Flavobacteriia.o\_Flavobacteriales.f\_Blattaba

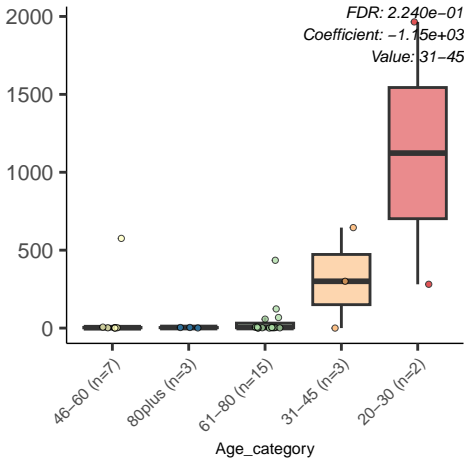



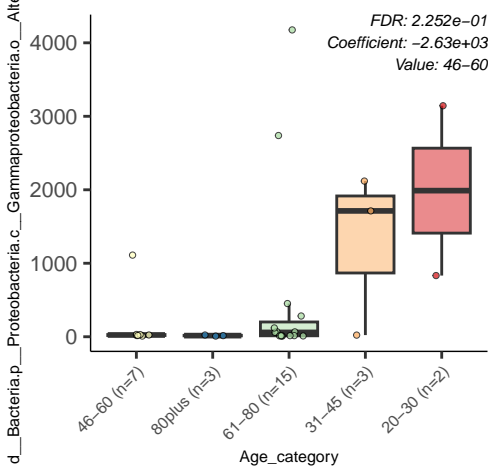

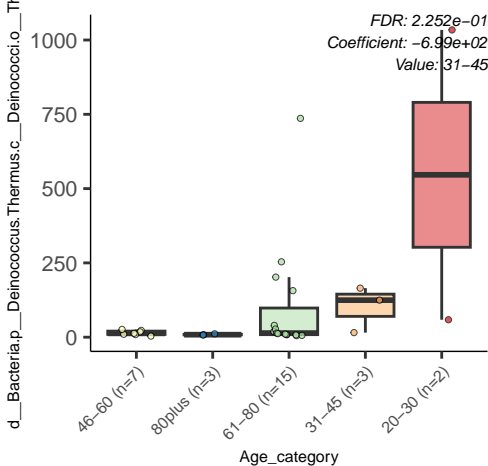

l\_\_Bacteria.p\_\_Deinococcus.Thermus.c\_\_Deinococci.o\_\_Thermales

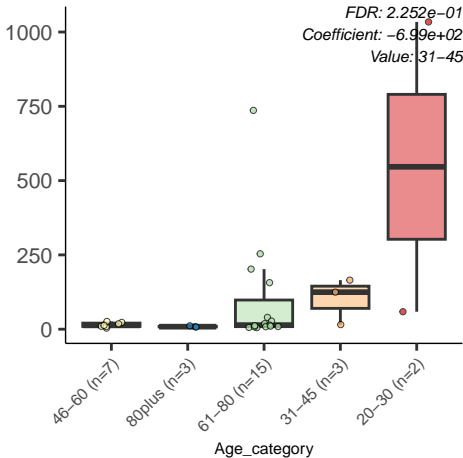

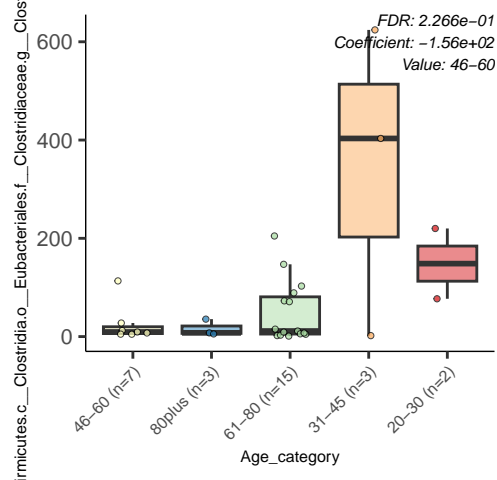

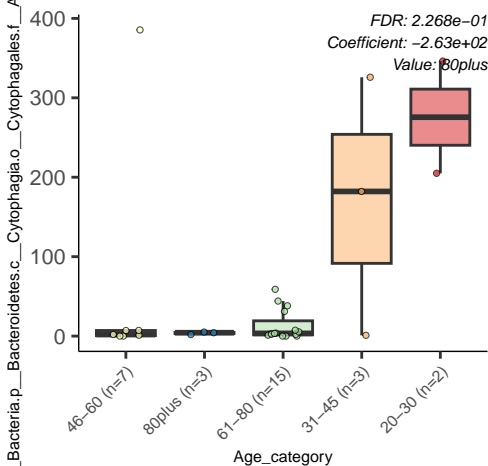

cteria.p\_\_Firmicutes.c\_\_Bacilli.o\_\_Lactobacillales.f\_\_Streptococcae

*FDR: 2.285e-01*  
*Coefficient: -2.02e+06*  
*Value: 80plus*

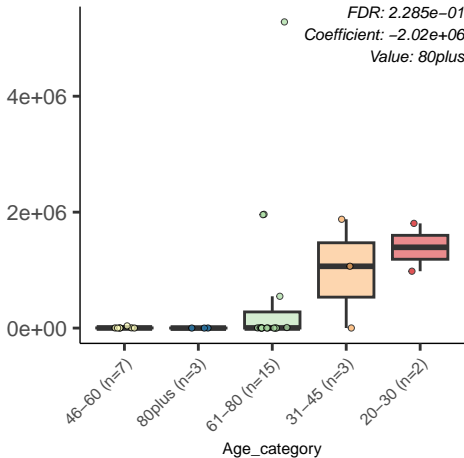

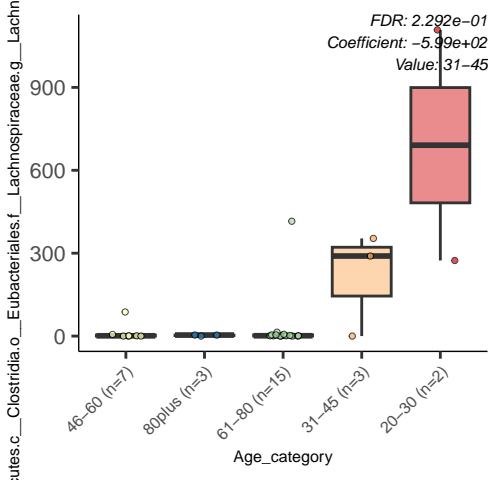

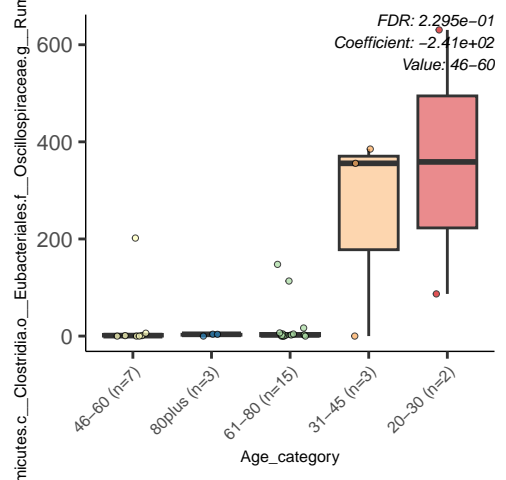



ilonproteobacteria.o\_\_Campylobacteriales.f\_\_Campylobacteraceae.g

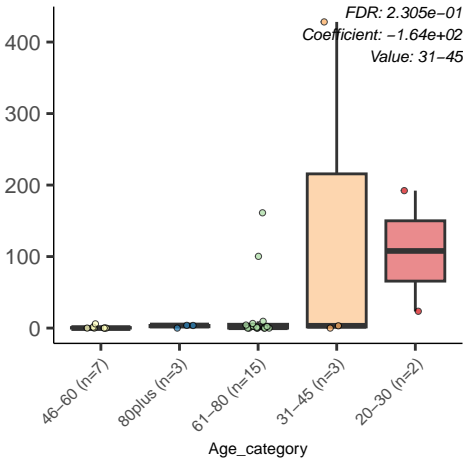

d\_\_Bacteria.p\_\_Cyanobacteria.o\_\_Nostocales.f\_\_Nostocaceae

FDR: 2.305e-01  
Coefficient: -6.43e+01  
Value: 80plus

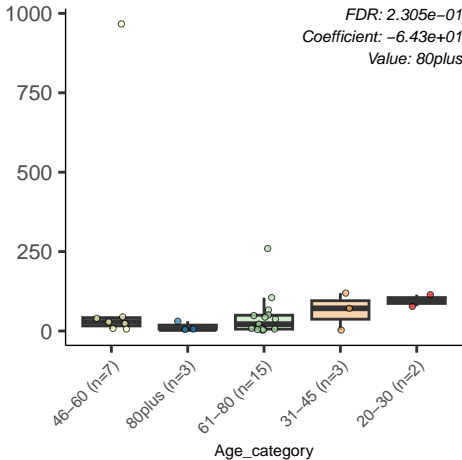

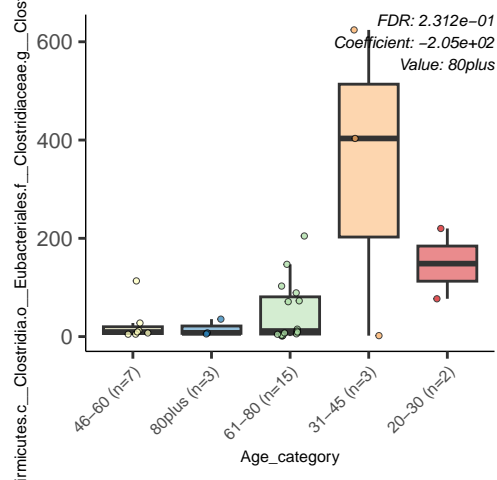

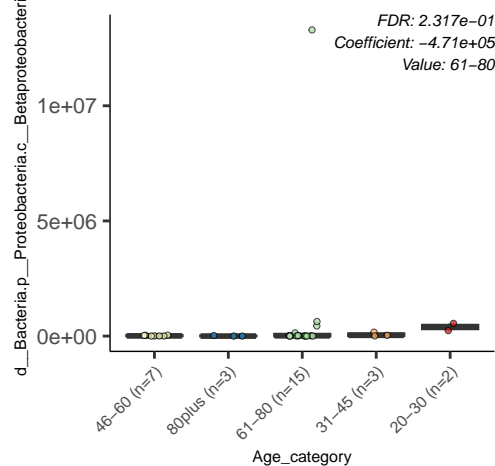

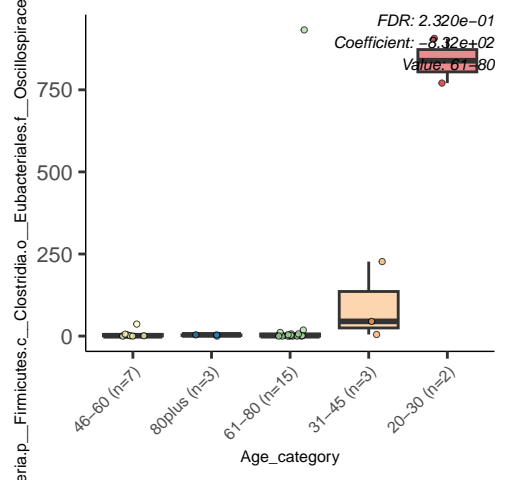

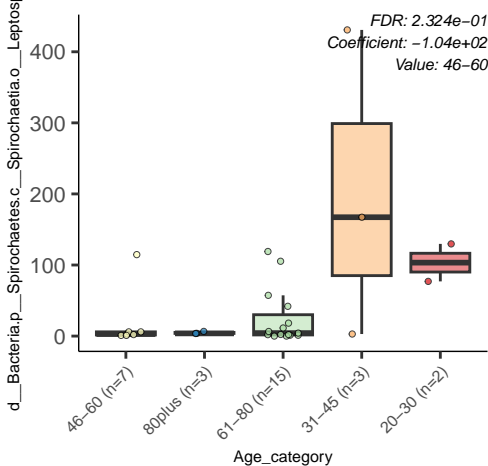

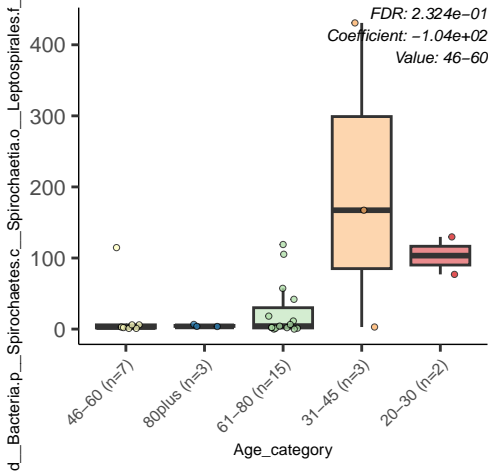

ia.c\_\_Fusobacteriia.o\_\_Fusobacteriales.f\_\_Fusobacteriaceae.g\_\_F

*FDR: 2.338e-01*  
*Coefficient: 3.21e+02*  
*Value: 31-45*

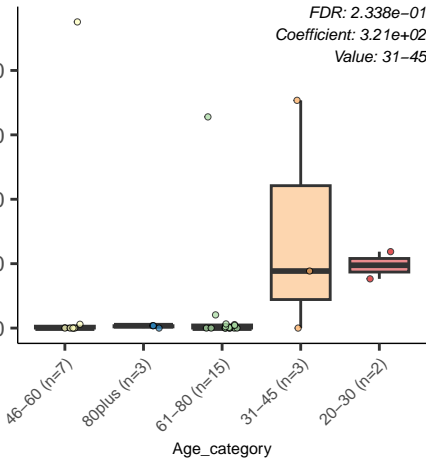



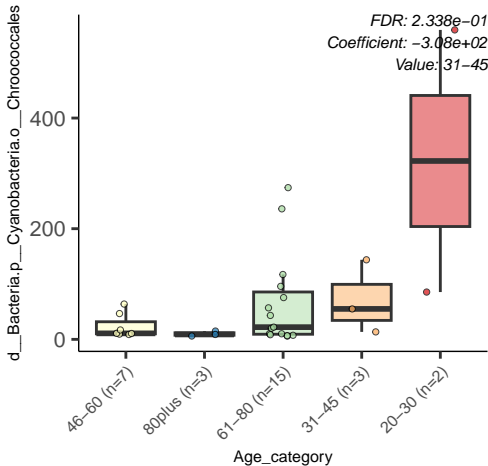

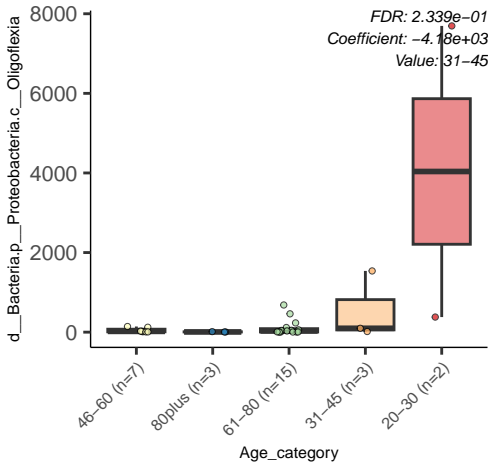

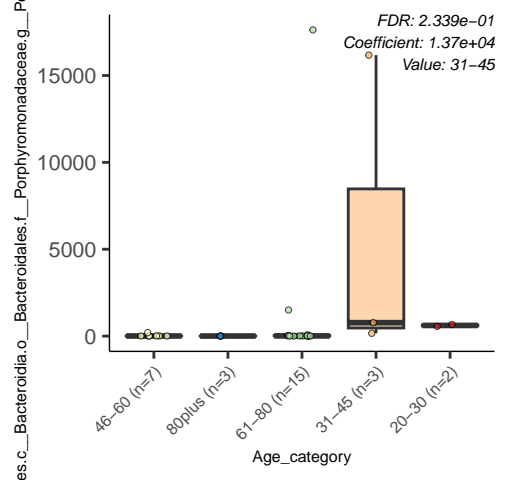

acteroidetes.c\_\_Bacteroidia.o\_\_Bacteroidales.f\_\_Prevotellaceae.g

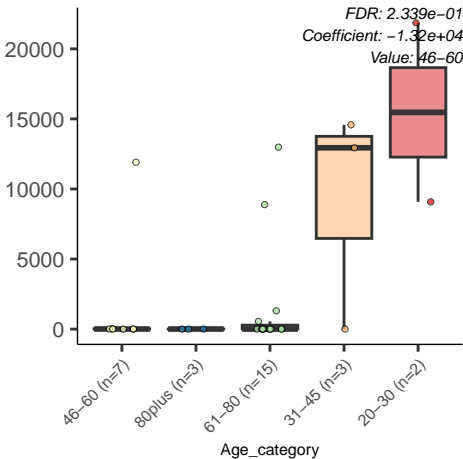

d\_Bacteria.p\_Cyanobacteria.o\_Oscillatoriales.f\_Oscillatoriaceae

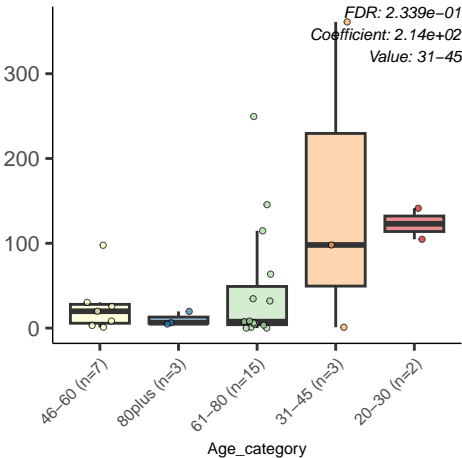

Bacteria.p\_Actinobacteria.c\_Actinomycetia.o\_Corynebacteriales

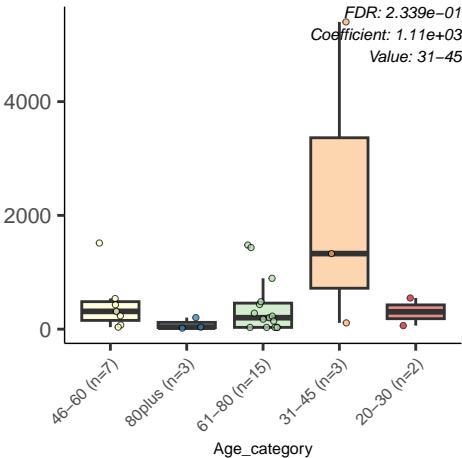

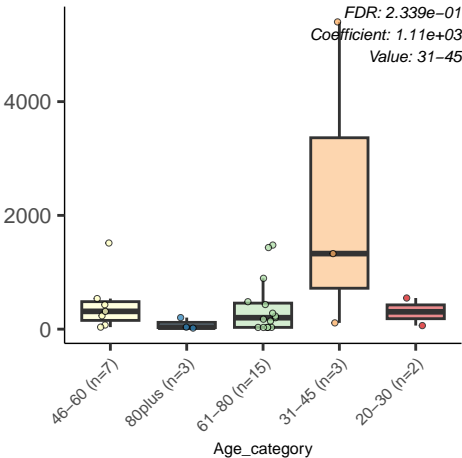

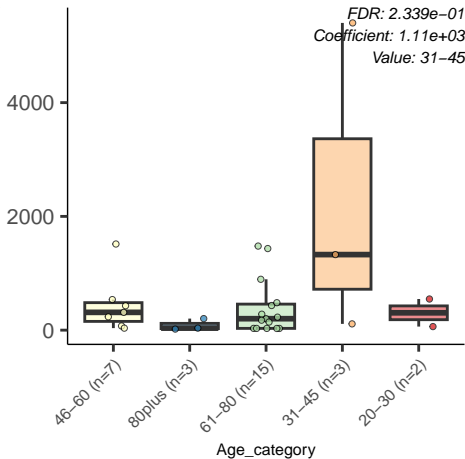



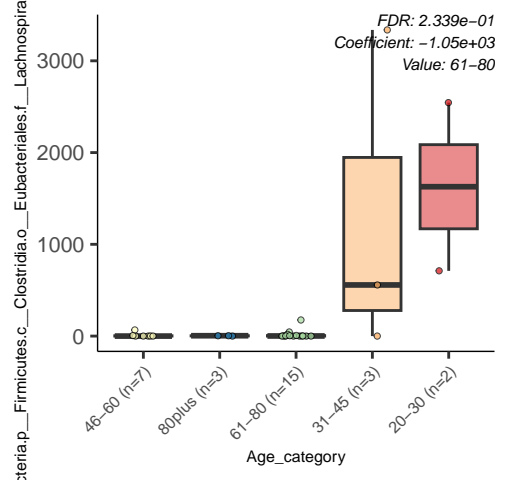

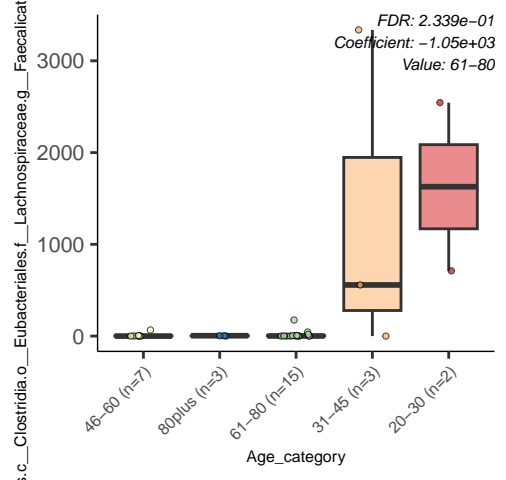

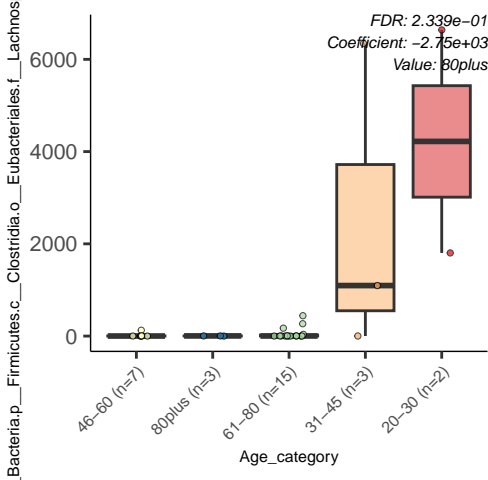

Firmicutes.c\_\_Clostridia.o\_\_Eubacteriales.f\_\_Lachnospiraceae.g

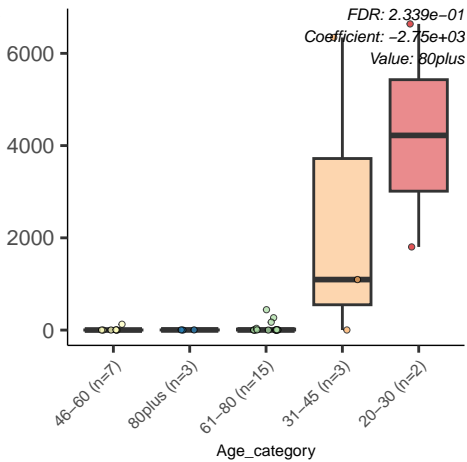

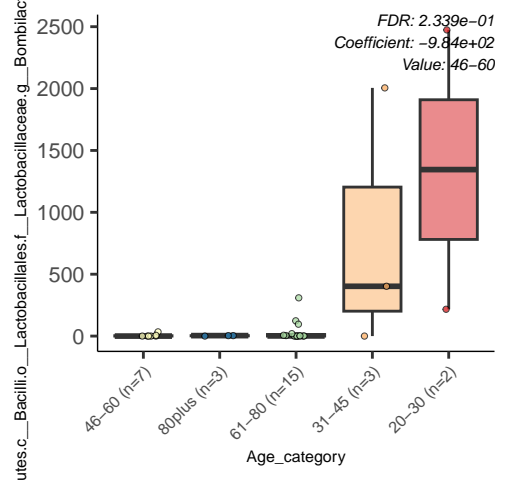

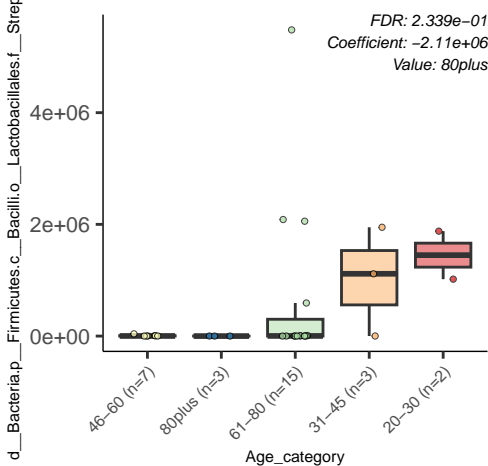

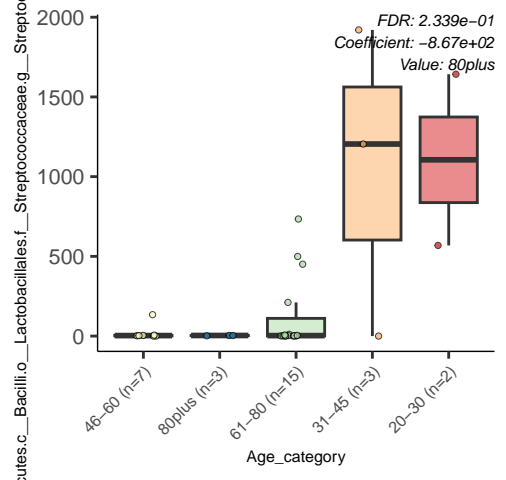

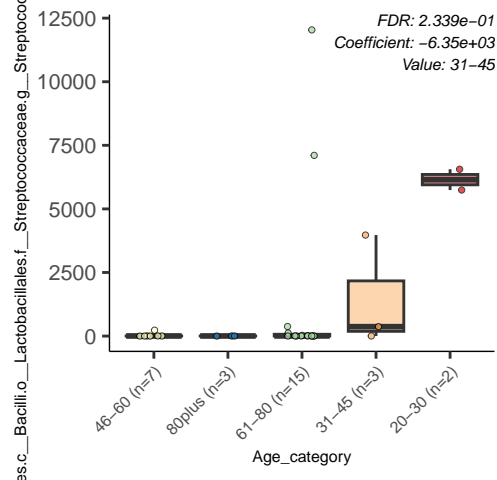



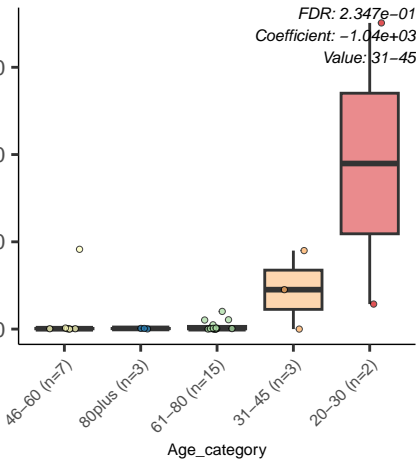

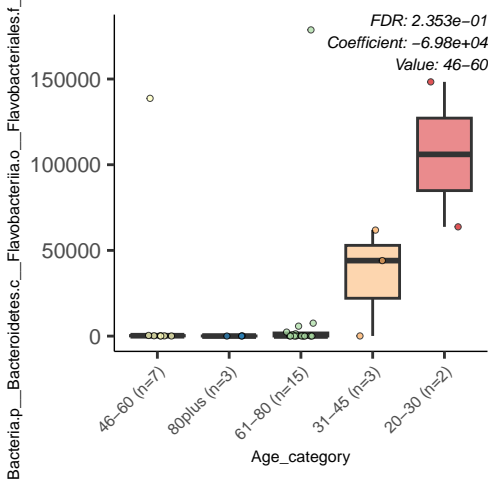

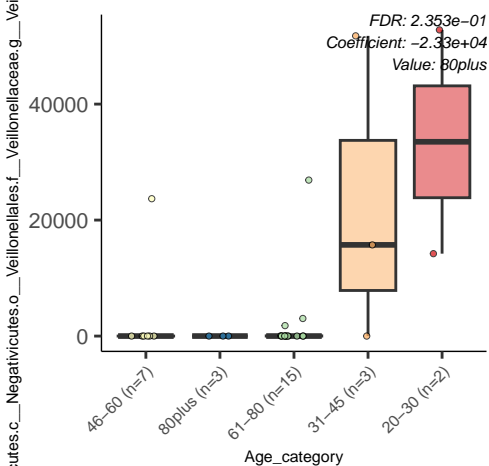

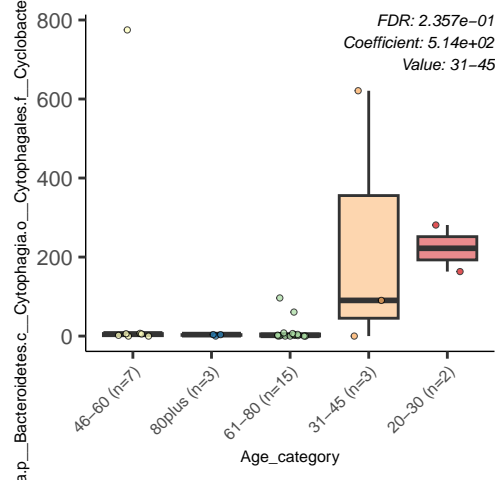

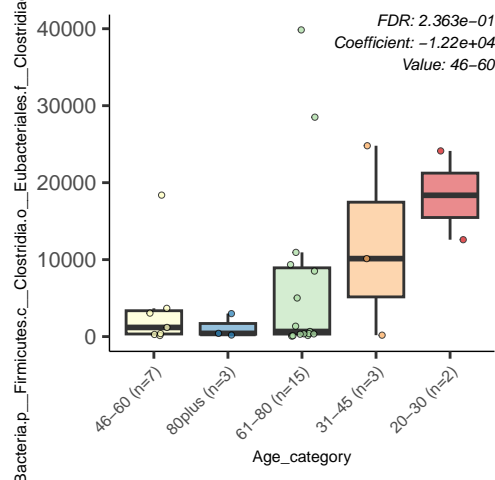

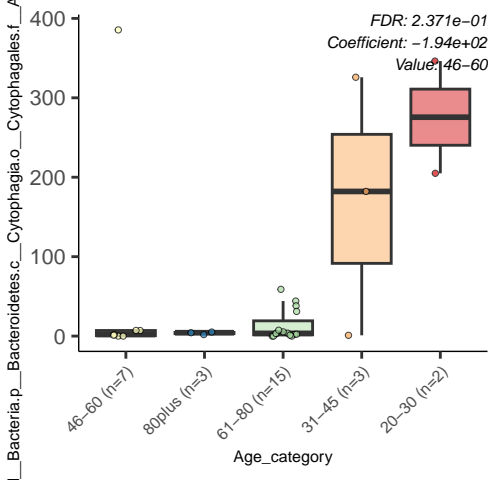

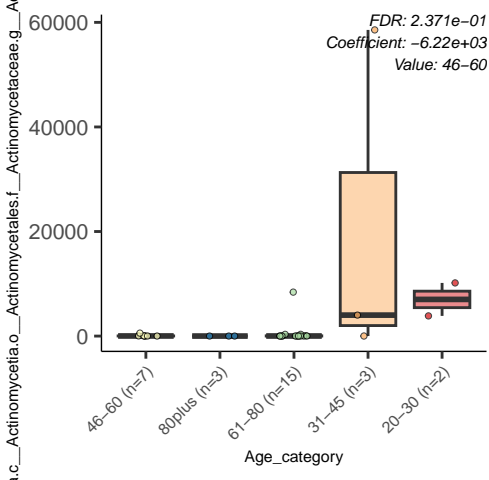

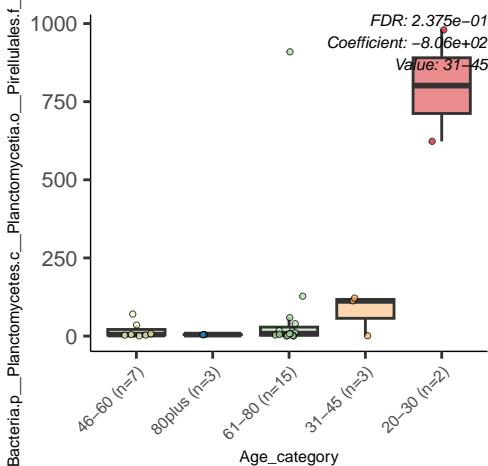



Bacteria.p\_\_Proteobacteria.c\_\_Alphaproteobacteria.o\_\_Rickettsiales

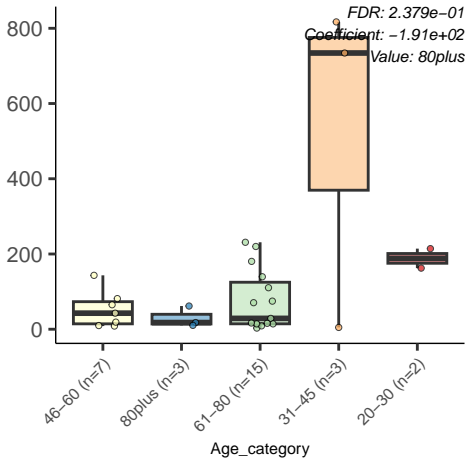

Bacteria.p\_Firmicutes.c\_Clostridia.o\_Eubacteriales.f\_Lachnosp

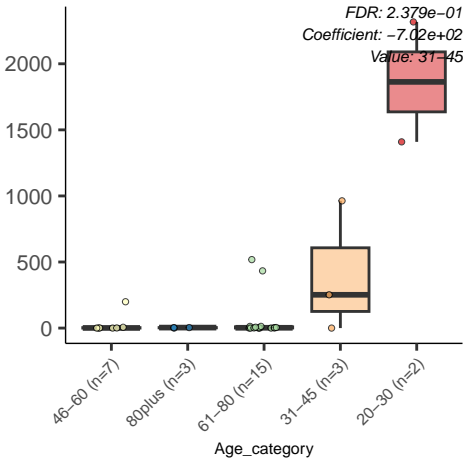

p\_\_Firmicutes.c\_\_Clostridia.o\_\_Eubacteriales.f\_\_Lachnospiraceae.g\_\_

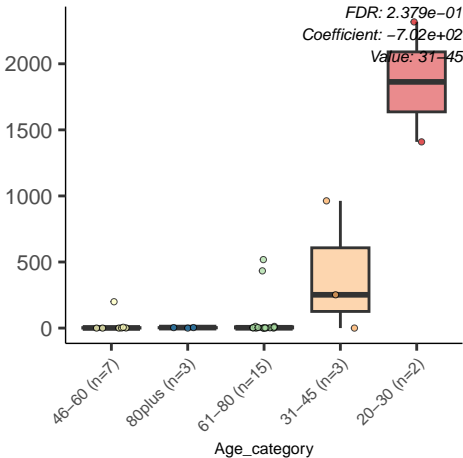

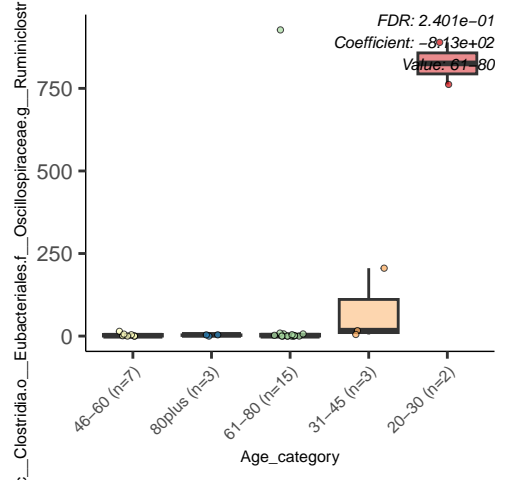

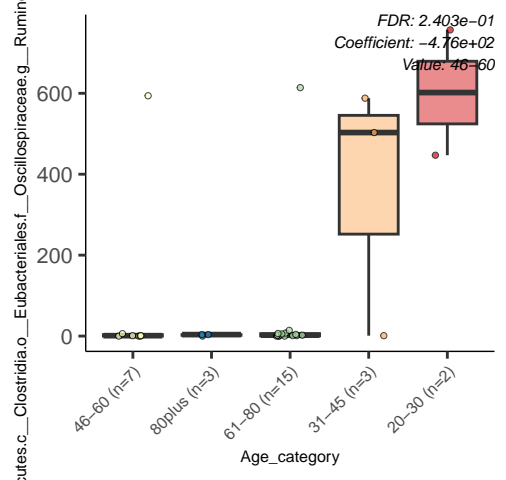



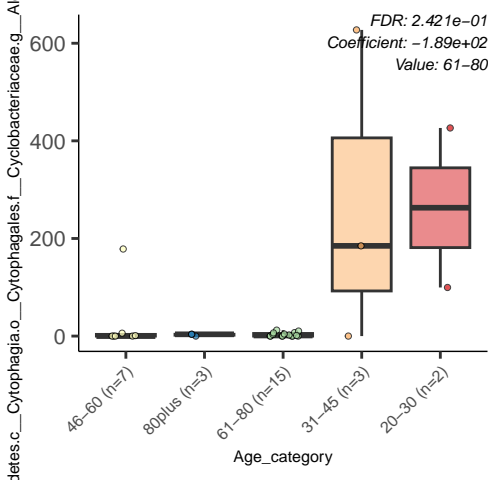

micutes.c\_\_Clostridia.o\_\_Eubacteriales.f\_\_Lachnospiraceae.g\_\_Ent

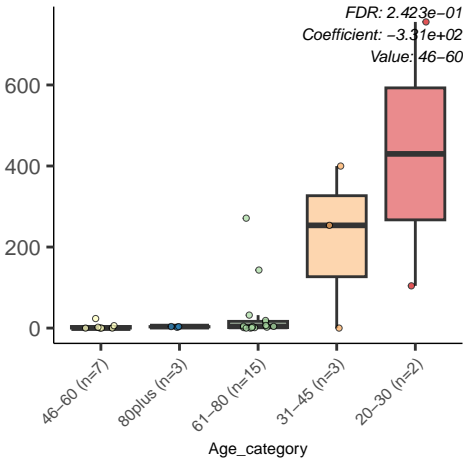



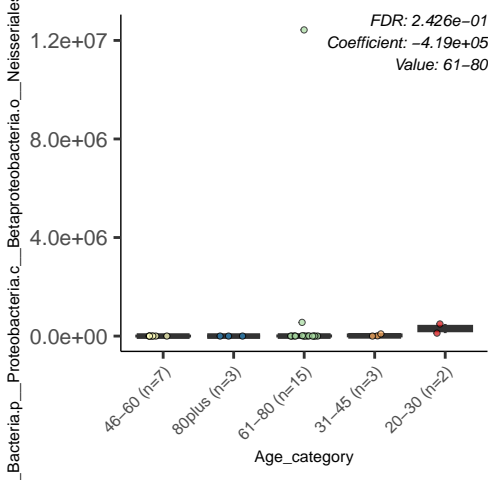

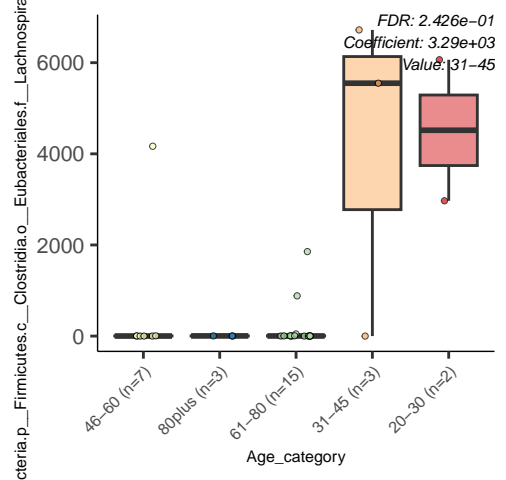

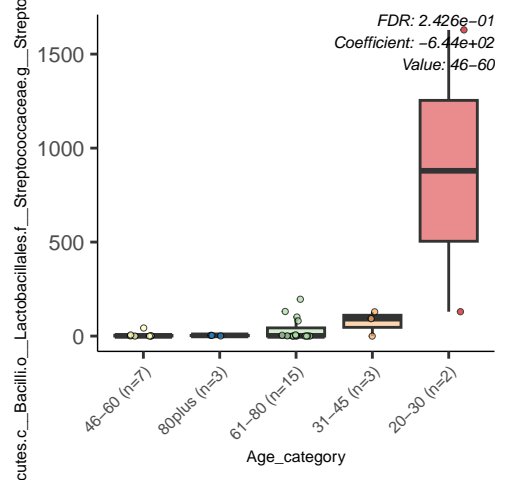

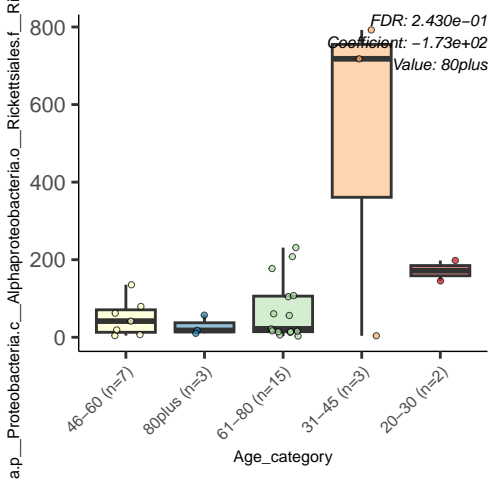

acteria.c\_\_Actinomycetia.o\_\_Actinomycetales.f\_\_Actinomycetaceae.g\_\_

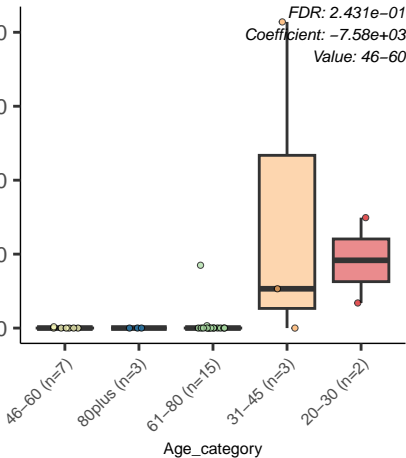

ria.p\_\_Proteobacteria.c\_\_Alphaproteobacteria.o\_\_Sphingomonadales

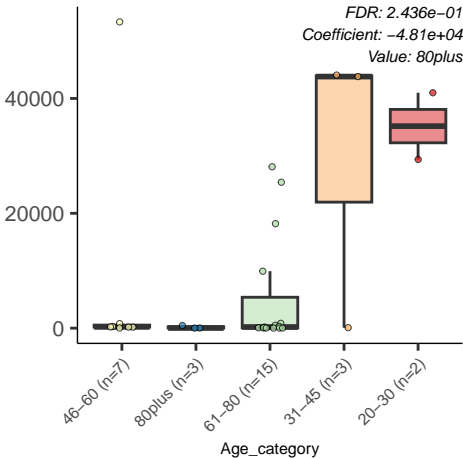

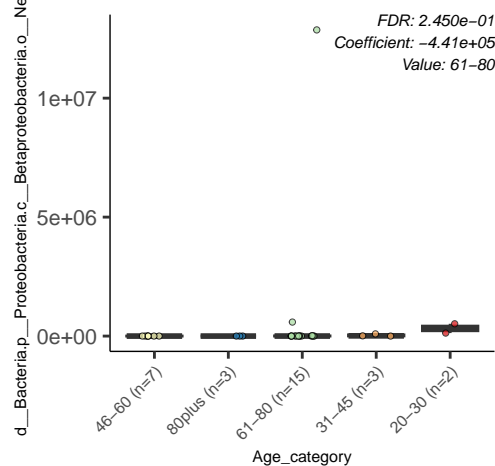

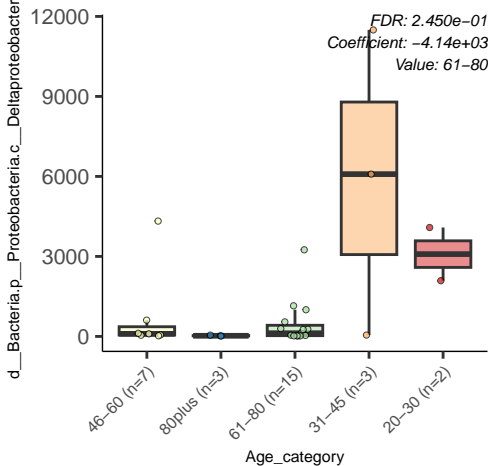



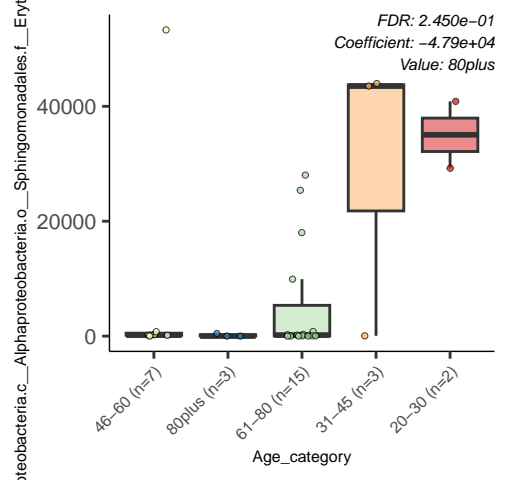

Alphaproteobacteria.o\_\_Sphingomonadales.f\_\_Erythrobacteracea

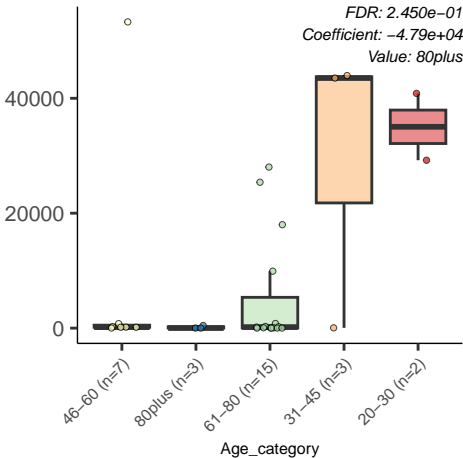

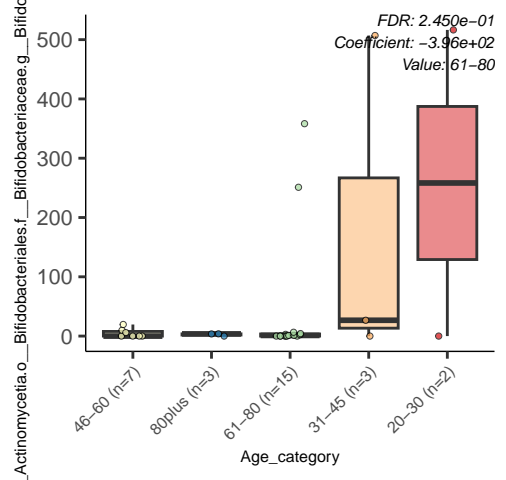

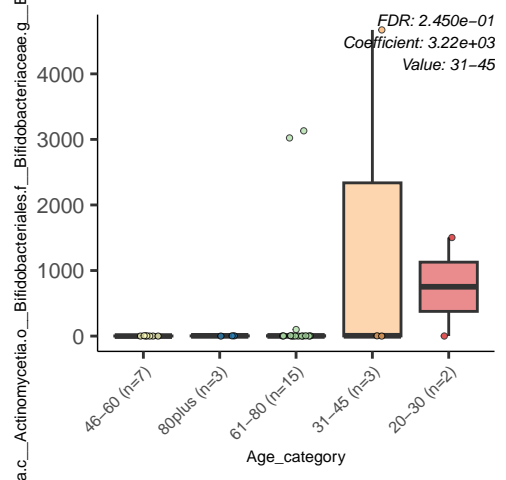

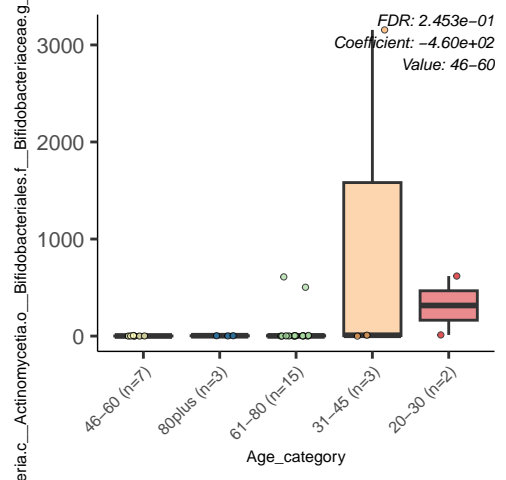

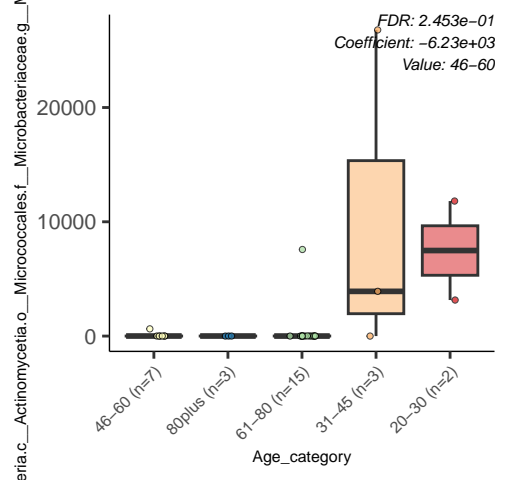

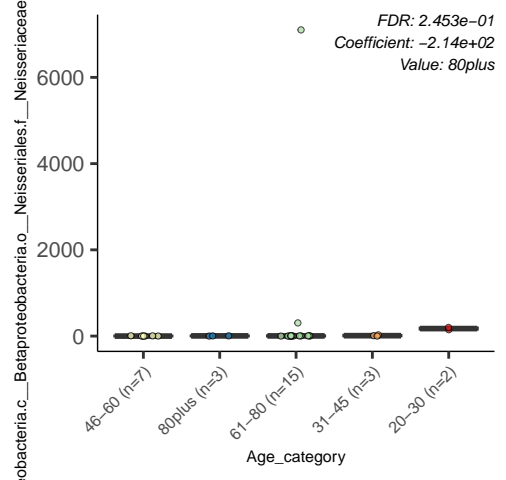

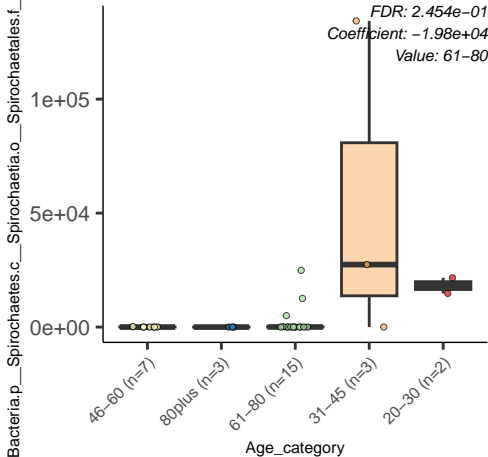



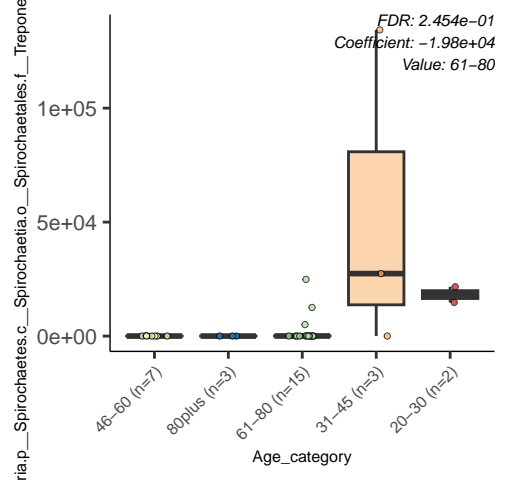

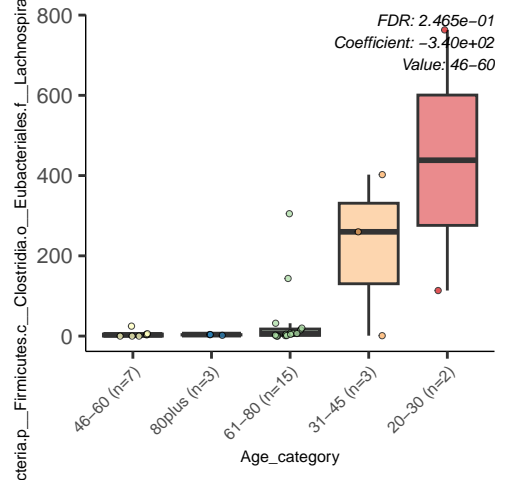

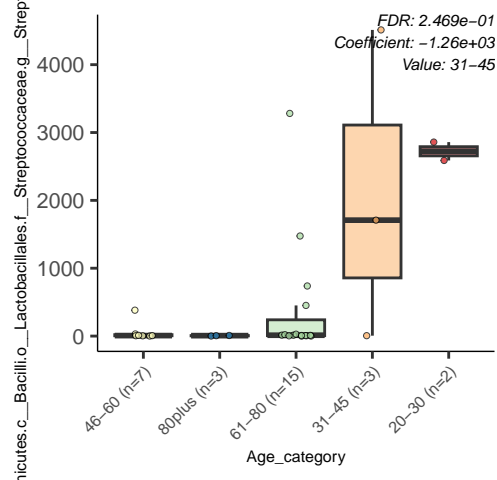

Bacteria.p\_Firmicutes.c\_Bacilli.o\_Bacillales.g\_Gemella.s\_G

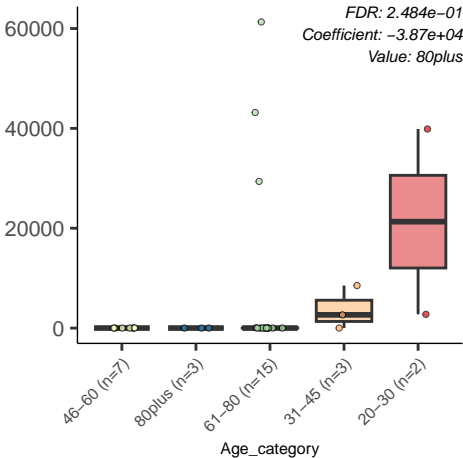

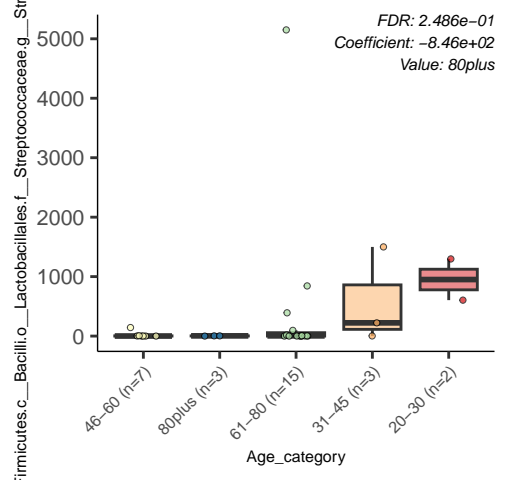

ria.c\_\_Gammaproteobacteria.o\_\_Pasteurellales.f\_\_Pasteurellaceae

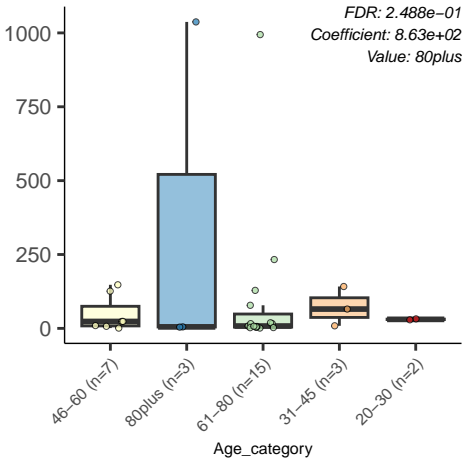

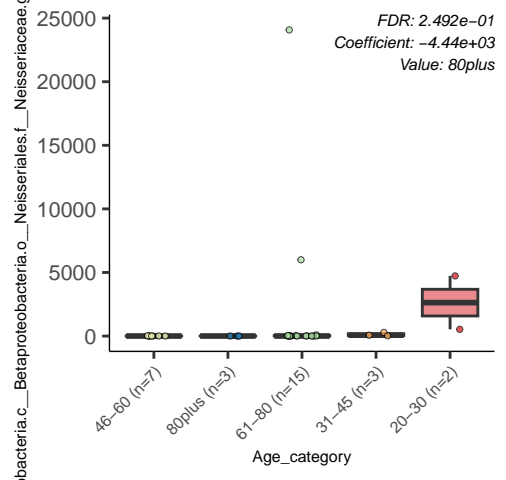

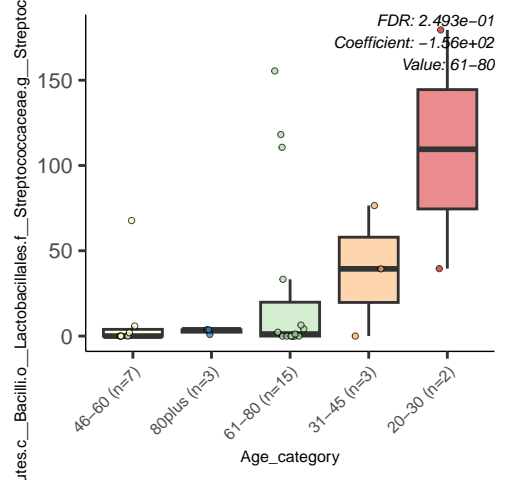



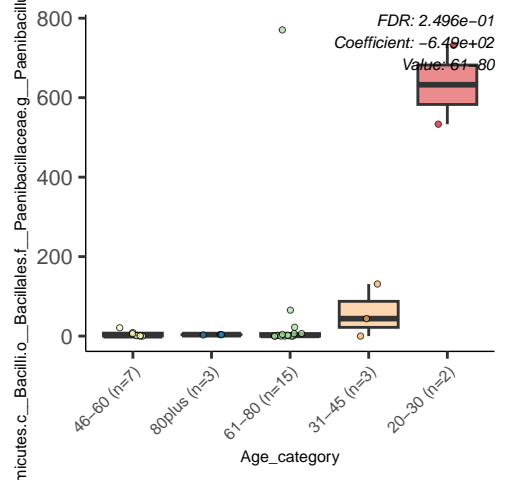

bacteria.p\_Actinobacteria.c\_Actinomycetia.o\_Corynebacteriales.

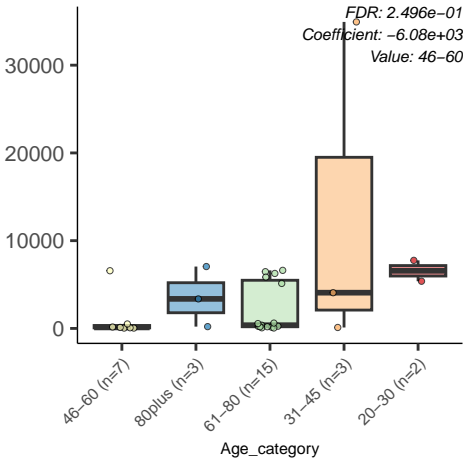

Supplement: s1 [file s1]
