# Supplementary material for: Metatranscriptome Analysis of Nasopharyngeal Swabs across the Varying Severity of COVID-19 Disease Demonstrated Unprecedented Species Diversity
Source: MDPI journal article supplement (doi:10.3390/microorganisms11071804), 2023-07-14

Gammaproteobacteria.o\_\_Cardiobacteriales.f\_\_Cardiobacteriaceae,

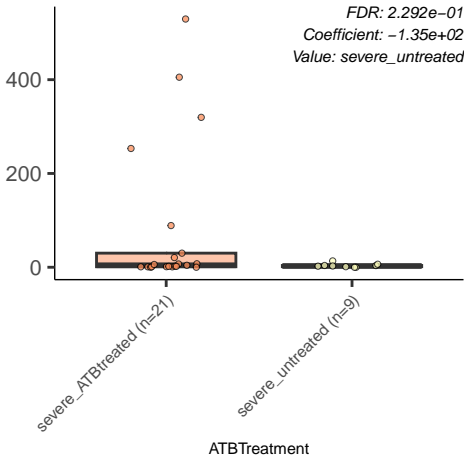

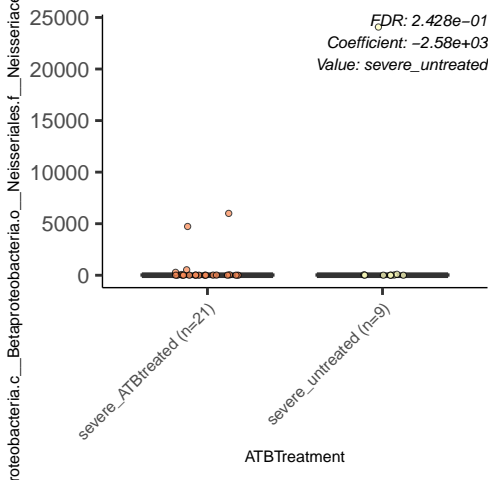

d\_\_Bacteria.p\_\_Proteobacteria.c\_\_Betaproteobacteria.o

FDR: 2.439e-01

Coefficient:  $-2.50e+05$

Value: *severe\_untreated*

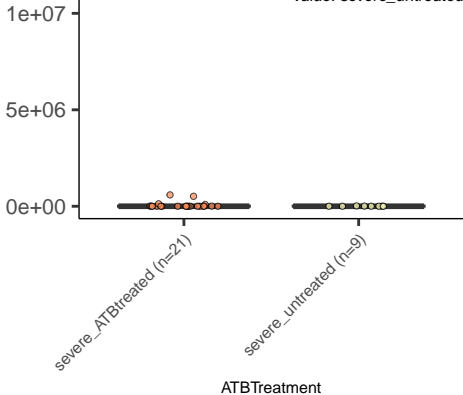

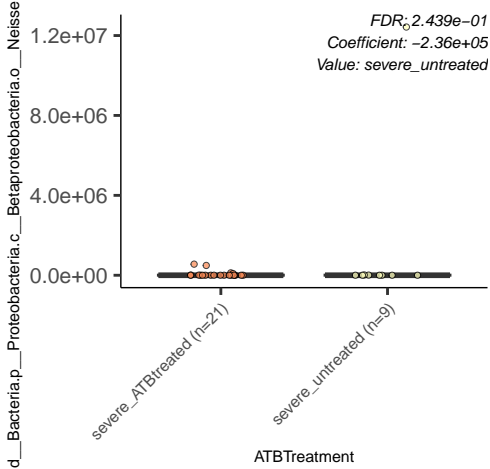

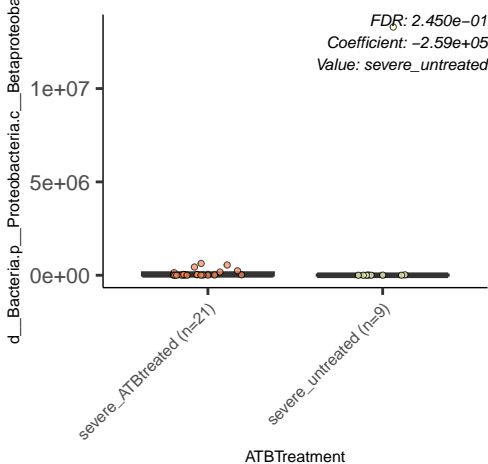

Supplement: s1 [file s1]
