# Supplementary figures and images for: Metatranscriptome Analysis of Nasopharyngeal Swabs across the Varying Severity of COVID-19 Disease Demonstrated Unprecedented Species Diversity
Source: MDPI journal article supplement (doi:10.3390/microorganisms11071804), 2023-07-14

icant associations ( $-\log(qval) \cdot \text{sign}(coeff)$ )

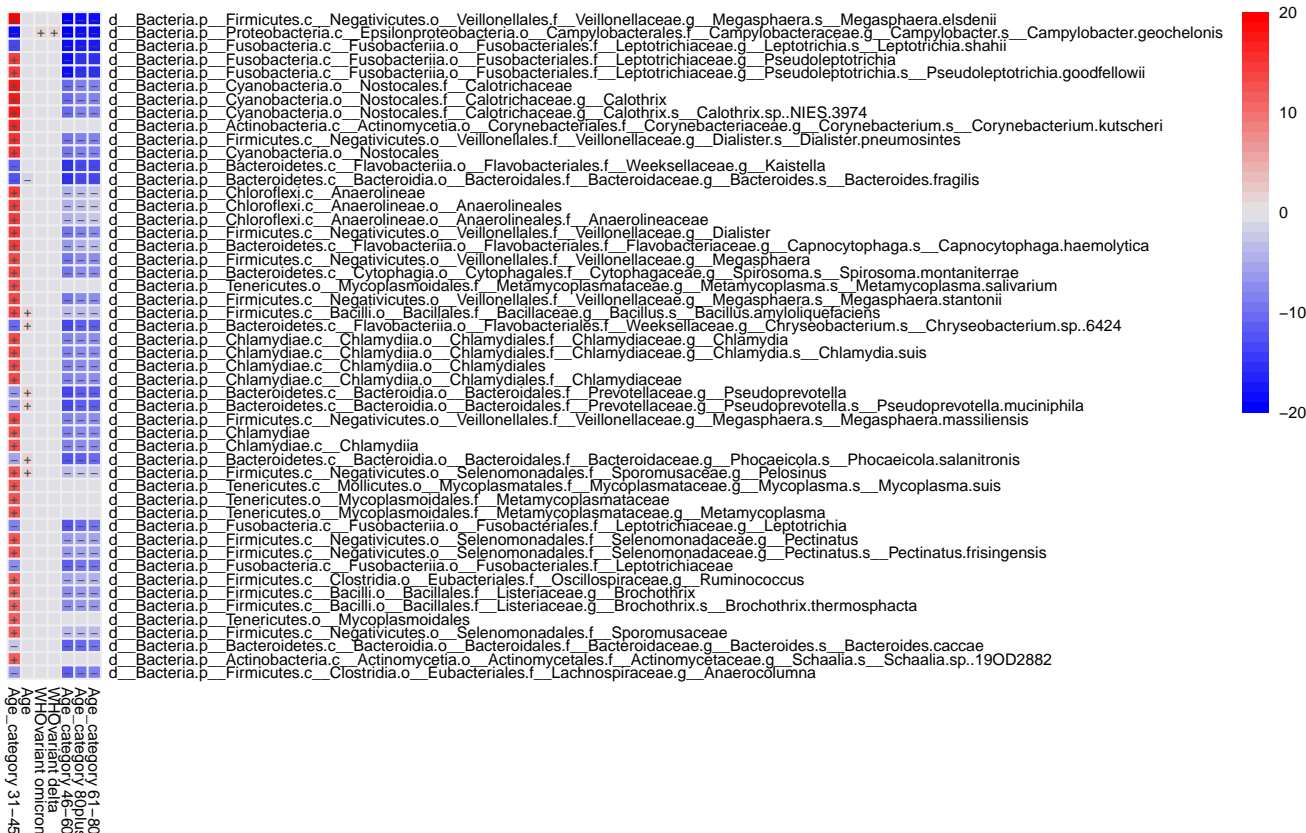

Supplement: s1 [file s1]

c\_Actinomycetia.o\_Propionibacteriales.f\_Propionibacteriaceae.g

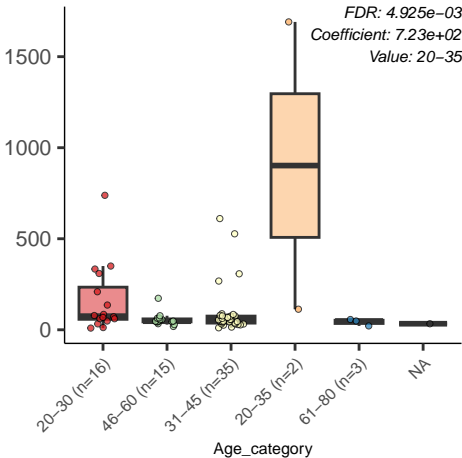

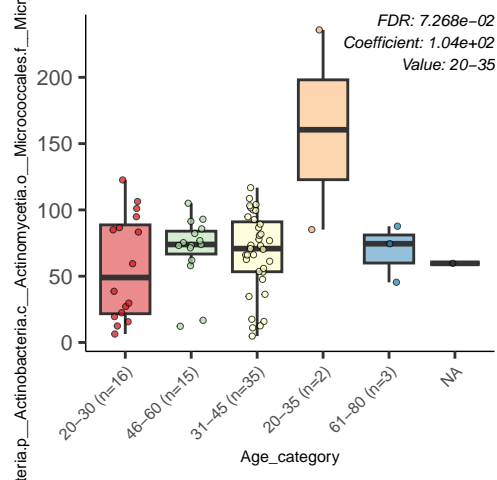

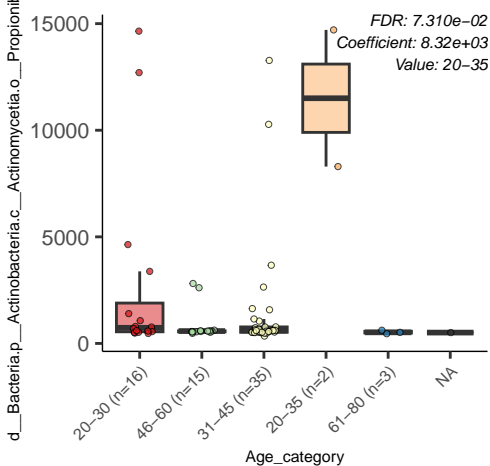

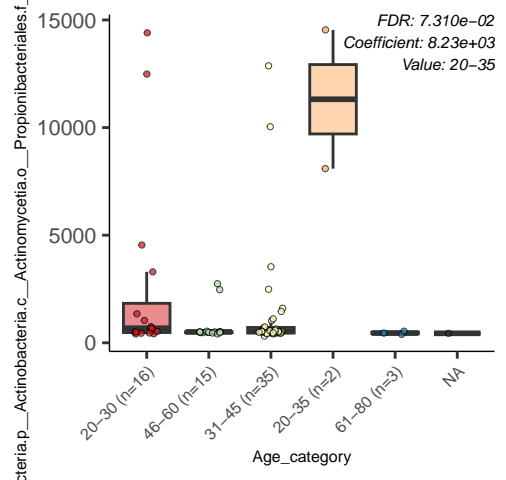

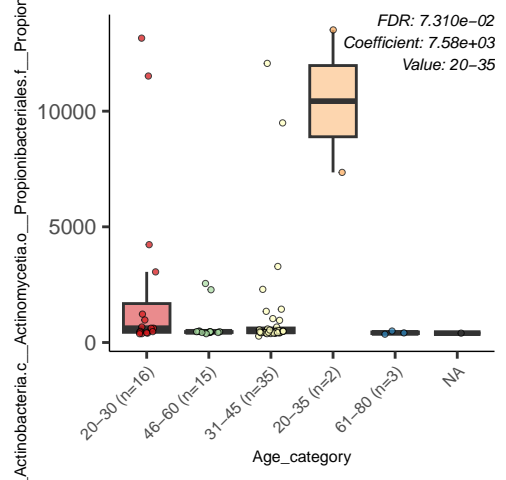

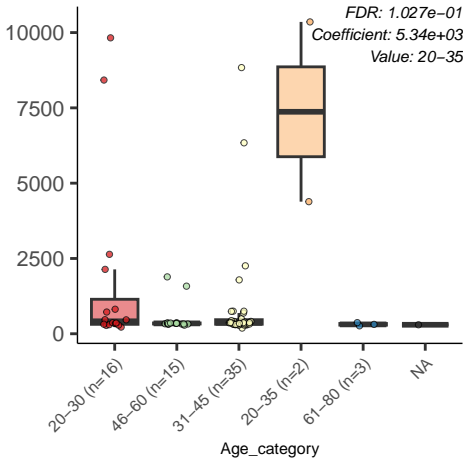

Supplement: s1 [file s1]

significant associations ( $-\log(qval) * \text{sign}(coeff)$ )

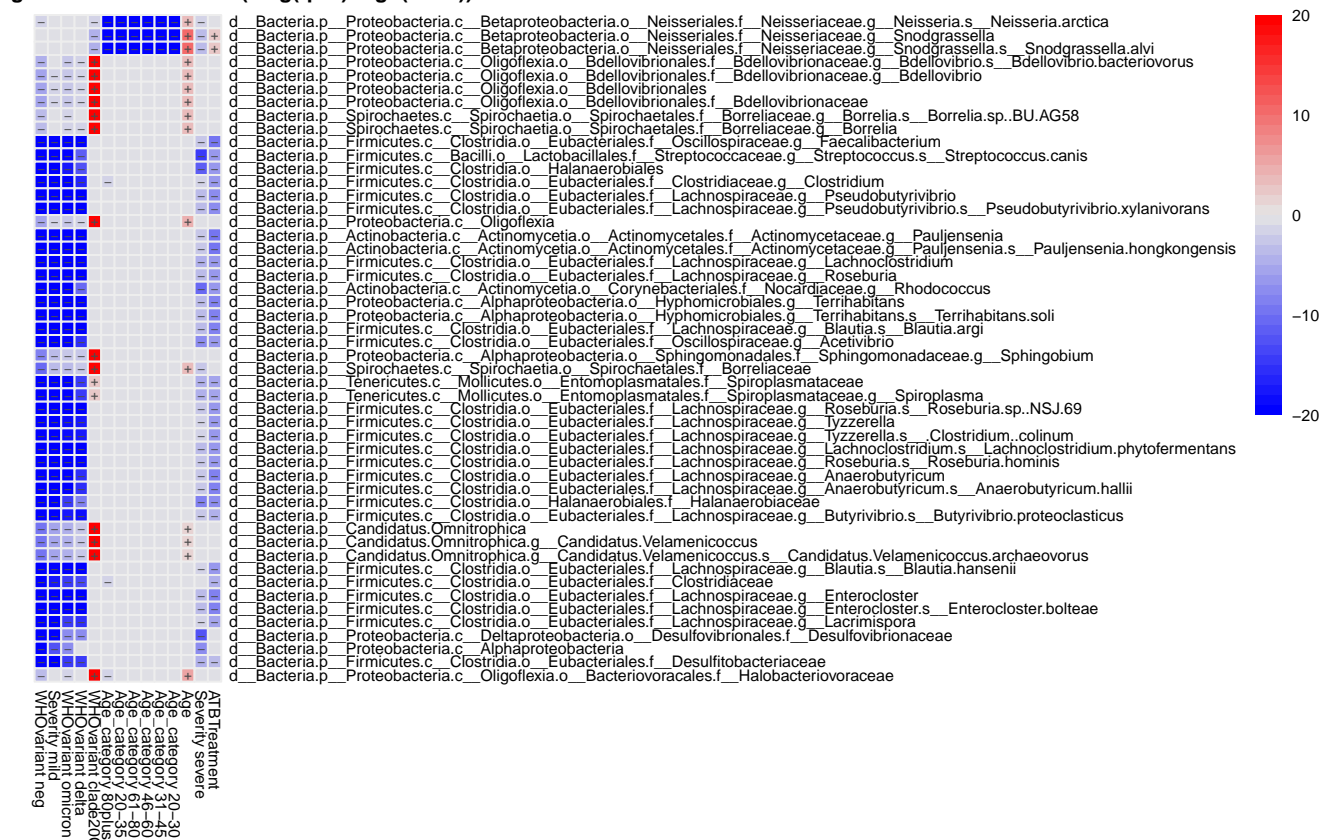

Supplement: s1 [file s1]
